# Supplementary material for: Distinguishing between bulk and edge hydroxyl vibrational properties of 2 : 1 phyllosilicates via deuteration
Source: Royal Society of Chemistry journal article supplement (doi:10.1039/c9cc00164f), 2019-01-01
Supplement: c9cc00164f1.pdf [file c9cc00164f1.pdf]

## LAMMPS Input Files for Pyrophyllite Calculations

### Bulk Pyrophyllite With Angle Bending Term

#### LAMMPS Data File:

LAMMPS data file. clayff2lmp v1.0.0 / 03 Oct 2017 / CGMM for bulkpy-6x4x4Clean

3840 atoms  
384 bonds  
768 angles  
0 dihedrals  
0 impropers

5 atom types  
1 bond types types  
1 angle types types

-15.530100000 15.530100000 xlo xhi  
-17.818200000 17.818200000 ylo yhi  
-18.665000000 18.665000000 zlo zhi

Masses

1 26.981540 # ao  
2 1.007970 # ho  
3 15.999400 # ob  
4 15.999400 # oh  
5 28.085500 # st

Pair Coeffs # lj/cut/coul/long

1 0.0000013297 4.2713219316 # ao  
2 0.0000000000 0.0000000000 # ho  
3 0.1554164124 3.1655200879 # ob  
4 0.1554164124 3.1655200879 # oh  
5 0.0000018402 3.3019566252 # st

Bond Coeffs # harmonic

1 132.2491 2.1815 0.945 # ho-oh

Angle Coeffs # harmonic

1 15.0000 110.0000 # ao-oh-ho

Atoms # full

|    |   |   |           |             |             |              |   |   |   |      |
|----|---|---|-----------|-------------|-------------|--------------|---|---|---|------|
| 1  | 1 | 1 | 1.575000  | 2.588555029 | 1.474661568 | 0.000270632  | 0 | 0 | 0 | # ao |
| 2  | 1 | 1 | 1.575000  | 0.000205029 | 5.929211568 | 0.000270632  | 0 | 0 | 0 | # ao |
| 3  | 1 | 1 | 1.575000  | 2.588144971 | 7.434438432 | -0.000270632 | 0 | 0 | 0 | # ao |
| 4  | 1 | 1 | 1.575000  | 5.176494971 | 2.979888432 | -0.000270632 | 0 | 0 | 0 | # ao |
| 5  | 1 | 2 | 0.425000  | 3.734650872 | 4.457267322 | 1.486115063  | 0 | 0 | 0 | # ho |
| 6  | 1 | 2 | 0.425000  | 1.146300872 | 0.002717322 | 1.486115063  | 0 | 0 | 0 | # ho |
| 7  | 1 | 2 | 0.425000  | 1.442049128 | 4.451832678 | -1.486115063 | 0 | 0 | 0 | # ho |
| 8  | 1 | 2 | 0.425000  | 4.030399128 | 8.906382678 | -1.486115063 | 0 | 0 | 0 | # ho |
| 9  | 1 | 3 | -1.050000 | 0.981314655 | 1.677501481 | -1.033422068 | 0 | 0 | 0 | # ob |
| 10 | 1 | 3 | -1.050000 | 5.023517264 | 6.305096126 | -3.231846262 | 0 | 0 | 0 | # ob |
| 11 | 1 | 3 | -1.050000 | 3.570244487 | 2.773649320 | -1.033631378 | 0 | 0 | 0 | # ob |
| 12 | 1 | 3 | -1.050000 | 2.434839092 | 7.048710300 | -3.233079711 | 0 | 0 | 0 | # ob |
| 13 | 1 | 3 | -1.050000 | 0.981894487 | 7.228199320 | -1.033631378 | 0 | 0 | 0 | # ob |
| 14 | 1 | 3 | -1.050000 | 1.606455513 | 6.135450680 | 1.033631378  | 0 | 0 | 0 | # ob |
| 15 | 1 | 3 | -1.050000 | 5.023189092 | 2.594160300 | -3.233079711 | 0 | 0 | 0 | # ob |
| 16 | 1 | 3 | -1.050000 | 1.607035345 | 2.777048519 | 1.033422068  | 0 | 0 | 0 | # ob |
| 17 | 1 | 3 | -1.050000 | 2.741532736 | 7.058553874 | 3.231846262  | 0 | 0 | 0 | # ob |
| 18 | 1 | 3 | -1.050000 | 4.195385345 | 7.231598519 | 1.033422068  | 0 | 0 | 0 | # ob |
| 19 | 1 | 3 | -1.050000 | 0.153182736 | 2.604003874 | 3.231846262  | 0 | 0 | 0 | # ob |
| 20 | 1 | 3 | -1.050000 | 2.741860908 | 1.860389700 | 3.233079711  | 0 | 0 | 0 | # ob |
| 21 | 1 | 4 | -0.950000 | 1.999257657 | 0.000940996 | 1.012582885  | 0 | 0 | 0 | # oh |
| 22 | 1 | 3 | -1.050000 | 4.667081651 | 0.003976970 | 3.061482417  | 0 | 0 | 0 | # ob |
| 23 | 1 | 4 | -0.950000 | 4.587607657 | 4.455490996 | 1.012582885  | 0 | 0 | 0 | # oh |
| 24 | 1 | 3 | -1.050000 | 2.078731651 | 4.458526970 | 3.061482417  | 0 | 0 | 0 | # ob |
| 25 | 1 | 4 | -0.950000 | 3.177442343 | 8.908159004 | -1.012582885 | 0 | 0 | 0 | # oh |
| 26 | 1 | 3 | -1.050000 | 0.509618349 | 8.905123030 | -3.061482417 | 0 | 0 | 0 | # ob |
| 27 | 1 | 4 | -0.950000 | 0.589092343 | 4.453609004 | -1.012582885 | 0 | 0 | 0 | # oh |
| 28 | 1 | 3 | -1.050000 | 3.097968349 | 4.450573030 | -3.061482417 | 0 | 0 | 0 | # ob |
| 29 | 1 | 3 | -1.050000 | 4.194805513 | 1.680900680 | 1.033631378  | 0 | 0 | 0 | # ob |
| 30 | 1 | 3 | -1.050000 | 0.153510908 | 6.314939700 | 3.233079711  | 0 | 0 | 0 | # ob |
| 31 | 1 | 3 | -1.050000 | 3.569664655 | 6.132051481 | -1.033422068 | 0 | 0 | 0 | # ob |
| 32 | 1 | 3 | -1.050000 | 2.435167264 | 1.850546126 | -3.231846262 | 0 | 0 | 0 | # ob |
| 33 | 1 | 5 | 2.100000  | 4.222997014 | 1.527119204 | 2.662777170  | 0 | 0 | 0 | # st |
| 34 | 1 | 5 | 2.100000  | 3.542027774 | 5.973370782 | -2.661798097 | 0 | 0 | 0 | # st |
| 35 | 1 | 5 | 2.100000  | 0.953702986 | 7.381980796 | -2.662777170 | 0 | 0 | 0 | # st |
| 36 | 1 | 5 | 2.100000  | 3.542052986 | 2.927430796 | -2.662777170 | 0 | 0 | 0 | # st |
| 37 | 1 | 5 | 2.100000  | 4.223022226 | 7.390279218 | 2.661798097  | 0 | 0 | 0 | # st |
| 38 | 1 | 5 | 2.100000  | 1.634672226 | 2.935729218 | 2.661798097  | 0 | 0 | 0 | # st |
| 39 | 1 | 5 | 2.100000  | 1.634647014 | 5.981669204 | 2.662777170  | 0 | 0 | 0 | # st |
| 40 | 1 | 5 | 2.100000  | 0.953677774 | 1.518820782 | -2.661798097 | 0 | 0 | 0 | # st |

|     |   |   |           |               |             |              |   |   |   |   |    |
|-----|---|---|-----------|---------------|-------------|--------------|---|---|---|---|----|
| 41  | 1 | 1 | 1.575000  | 7.765255029   | 1.474661568 | 0.000270632  | 0 | 0 | 0 | # | ao |
| 42  | 1 | 1 | 1.575000  | 5.176905029   | 5.929211568 | 0.000270632  | 0 | 0 | 0 | # | ao |
| 43  | 1 | 1 | 1.575000  | 7.764844971   | 7.434438432 | -0.000270632 | 0 | 0 | 0 | # | ao |
| 44  | 1 | 1 | 1.575000  | 10.353194971  | 2.979888432 | -0.000270632 | 0 | 0 | 0 | # | ao |
| 45  | 1 | 2 | 0.425000  | 8.911350872   | 4.457267322 | 1.486115063  | 0 | 0 | 0 | # | ho |
| 46  | 1 | 2 | 0.425000  | 6.323000872   | 0.002717322 | 1.486115063  | 0 | 0 | 0 | # | ho |
| 47  | 1 | 2 | 0.425000  | 6.618749128   | 4.451832678 | -1.486115063 | 0 | 0 | 0 | # | ho |
| 48  | 1 | 2 | 0.425000  | 9.207099128   | 8.906382678 | -1.486115063 | 0 | 0 | 0 | # | ho |
| 49  | 1 | 3 | -1.050000 | 6.158014655   | 1.677501481 | -1.033422068 | 0 | 0 | 0 | # | ob |
| 50  | 1 | 3 | -1.050000 | 10.200217264  | 6.305096126 | -3.231846262 | 0 | 0 | 0 | # | ob |
| 51  | 1 | 3 | -1.050000 | 8.746944487   | 2.773649320 | -1.033631378 | 0 | 0 | 0 | # | ob |
| 52  | 1 | 3 | -1.050000 | 7.611539092   | 7.048710300 | -3.233079711 | 0 | 0 | 0 | # | ob |
| 53  | 1 | 3 | -1.050000 | 6.158594487   | 7.228199320 | -1.033631378 | 0 | 0 | 0 | # | ob |
| 54  | 1 | 3 | -1.050000 | 6.783155513   | 6.135450680 | 1.033631378  | 0 | 0 | 0 | # | ob |
| 55  | 1 | 3 | -1.050000 | 10.199889092  | 2.594160300 | -3.233079711 | 0 | 0 | 0 | # | ob |
| 56  | 1 | 3 | -1.050000 | 6.783735345   | 2.777048519 | 1.033422068  | 0 | 0 | 0 | # | ob |
| 57  | 1 | 3 | -1.050000 | 7.918232736   | 7.058553874 | 3.231846262  | 0 | 0 | 0 | # | ob |
| 58  | 1 | 3 | -1.050000 | 9.372085345   | 7.231598519 | 1.033422068  | 0 | 0 | 0 | # | ob |
| 59  | 1 | 3 | -1.050000 | 5.329882736   | 2.604003874 | 3.231846262  | 0 | 0 | 0 | # | ob |
| 60  | 1 | 3 | -1.050000 | 7.918560908   | 1.860389700 | 3.233079711  | 0 | 0 | 0 | # | ob |
| 61  | 1 | 4 | -0.950000 | 7.175957657   | 0.000940996 | 1.012582885  | 0 | 0 | 0 | # | oh |
| 62  | 1 | 3 | -1.050000 | 9.843781651   | 0.003976970 | 3.061482417  | 0 | 0 | 0 | # | ob |
| 63  | 1 | 4 | -0.950000 | 9.764307657   | 4.455490996 | 1.012582885  | 0 | 0 | 0 | # | oh |
| 64  | 1 | 3 | -1.050000 | 7.255431651   | 4.458526970 | 3.061482417  | 0 | 0 | 0 | # | ob |
| 65  | 1 | 4 | -0.950000 | 8.354142343   | 8.908159004 | -1.012582885 | 0 | 0 | 0 | # | oh |
| 66  | 1 | 3 | -1.050000 | 5.686318349   | 8.905123030 | -3.061482417 | 0 | 0 | 0 | # | ob |
| 67  | 1 | 4 | -0.950000 | 5.765792343   | 4.453609004 | -1.012582885 | 0 | 0 | 0 | # | oh |
| 68  | 1 | 3 | -1.050000 | 8.274668349   | 4.450573030 | -3.061482417 | 0 | 0 | 0 | # | ob |
| 69  | 1 | 3 | -1.050000 | 9.371505513   | 1.680900680 | 1.033631378  | 0 | 0 | 0 | # | ob |
| 70  | 1 | 3 | -1.050000 | 5.330210908   | 6.314939700 | 3.233079711  | 0 | 0 | 0 | # | ob |
| 71  | 1 | 3 | -1.050000 | 8.746364655   | 6.132051481 | -1.033422068 | 0 | 0 | 0 | # | ob |
| 72  | 1 | 3 | -1.050000 | 7.611867264   | 1.850546126 | -3.231846262 | 0 | 0 | 0 | # | ob |
| 73  | 1 | 5 | 2.100000  | 9.399697014   | 1.527119204 | 2.662777170  | 0 | 0 | 0 | # | st |
| 74  | 1 | 5 | 2.100000  | 8.718727774   | 5.973370782 | -2.661798097 | 0 | 0 | 0 | # | st |
| 75  | 1 | 5 | 2.100000  | 6.130402986   | 7.381980796 | -2.662777170 | 0 | 0 | 0 | # | st |
| 76  | 1 | 5 | 2.100000  | 8.718752986   | 2.927430796 | -2.662777170 | 0 | 0 | 0 | # | st |
| 77  | 1 | 5 | 2.100000  | 9.399722226   | 7.390279218 | 2.661798097  | 0 | 0 | 0 | # | st |
| 78  | 1 | 5 | 2.100000  | 6.811372226   | 2.935729218 | 2.661798097  | 0 | 0 | 0 | # | st |
| 79  | 1 | 5 | 2.100000  | 6.811347014   | 5.981669204 | 2.662777170  | 0 | 0 | 0 | # | st |
| 80  | 1 | 5 | 2.100000  | 6.130377774   | 1.518820782 | -2.661798097 | 0 | 0 | 0 | # | st |
| 81  | 1 | 1 | 1.575000  | 12.941955029  | 1.474661568 | 0.000270632  | 0 | 0 | 0 | # | ao |
| 82  | 1 | 1 | 1.575000  | 10.353605029  | 5.929211568 | 0.000270632  | 0 | 0 | 0 | # | ao |
| 83  | 1 | 1 | 1.575000  | 12.941544971  | 7.434438432 | -0.000270632 | 0 | 0 | 0 | # | ao |
| 84  | 1 | 1 | 1.575000  | 15.529894971  | 2.979888432 | -0.000270632 | 0 | 0 | 0 | # | ao |
| 85  | 1 | 2 | 0.425000  | 14.088050872  | 4.457267322 | 1.486115063  | 0 | 0 | 0 | # | ho |
| 86  | 1 | 2 | 0.425000  | 11.499700872  | 0.002717322 | 1.486115063  | 0 | 0 | 0 | # | ho |
| 87  | 1 | 2 | 0.425000  | 11.795449128  | 4.451832678 | -1.486115063 | 0 | 0 | 0 | # | ho |
| 88  | 1 | 2 | 0.425000  | 14.383799128  | 8.906382678 | -1.486115063 | 0 | 0 | 0 | # | ho |
| 89  | 1 | 3 | -1.050000 | 11.334714655  | 1.677501481 | -1.033422068 | 0 | 0 | 0 | # | ob |
| 90  | 1 | 3 | -1.050000 | 15.376917264  | 6.305096126 | -3.231846262 | 0 | 0 | 0 | # | ob |
| 91  | 1 | 3 | -1.050000 | 13.923644487  | 2.773649320 | -1.033631378 | 0 | 0 | 0 | # | ob |
| 92  | 1 | 3 | -1.050000 | 12.788239092  | 7.048710300 | -3.233079711 | 0 | 0 | 0 | # | ob |
| 93  | 1 | 3 | -1.050000 | 11.335294487  | 7.228199320 | -1.033631378 | 0 | 0 | 0 | # | ob |
| 94  | 1 | 3 | -1.050000 | 11.959855513  | 6.135450680 | 1.033631378  | 0 | 0 | 0 | # | ob |
| 95  | 1 | 3 | -1.050000 | 15.376589092  | 2.594160300 | -3.233079711 | 0 | 0 | 0 | # | ob |
| 96  | 1 | 3 | -1.050000 | 11.960435345  | 2.777048519 | 1.033422068  | 0 | 0 | 0 | # | ob |
| 97  | 1 | 3 | -1.050000 | 13.094932736  | 7.058553874 | 3.231846262  | 0 | 0 | 0 | # | ob |
| 98  | 1 | 3 | -1.050000 | 14.548785345  | 7.231598519 | 1.033422068  | 0 | 0 | 0 | # | ob |
| 99  | 1 | 3 | -1.050000 | 10.506582736  | 2.604003874 | 3.231846262  | 0 | 0 | 0 | # | ob |
| 100 | 1 | 3 | -1.050000 | 13.095260908  | 1.860389700 | 3.233079711  | 0 | 0 | 0 | # | ob |
| 101 | 1 | 4 | -0.950000 | 12.352657657  | 0.000940996 | 1.012582885  | 0 | 0 | 0 | # | oh |
| 102 | 1 | 3 | -1.050000 | 15.020481651  | 0.003976970 | 3.061482417  | 0 | 0 | 0 | # | ob |
| 103 | 1 | 4 | -0.950000 | 14.941007657  | 4.455490996 | 1.012582885  | 0 | 0 | 0 | # | oh |
| 104 | 1 | 3 | -1.050000 | 12.432131651  | 4.458526970 | 3.061482417  | 0 | 0 | 0 | # | ob |
| 105 | 1 | 4 | -0.950000 | 13.530842343  | 8.908159004 | -1.012582885 | 0 | 0 | 0 | # | oh |
| 106 | 1 | 3 | -1.050000 | 10.863018349  | 8.905123030 | -3.061482417 | 0 | 0 | 0 | # | ob |
| 107 | 1 | 4 | -0.950000 | 10.942492343  | 4.453609004 | -1.012582885 | 0 | 0 | 0 | # | oh |
| 108 | 1 | 3 | -1.050000 | 13.451368349  | 4.450573030 | -3.061482417 | 0 | 0 | 0 | # | ob |
| 109 | 1 | 3 | -1.050000 | 14.548205513  | 1.680900680 | 1.033631378  | 0 | 0 | 0 | # | ob |
| 110 | 1 | 3 | -1.050000 | 10.506910908  | 6.314939700 | 3.233079711  | 0 | 0 | 0 | # | ob |
| 111 | 1 | 3 | -1.050000 | 13.923064655  | 6.132051481 | -1.033422068 | 0 | 0 | 0 | # | ob |
| 112 | 1 | 3 | -1.050000 | 12.788567264  | 1.850546126 | -3.231846262 | 0 | 0 | 0 | # | ob |
| 113 | 1 | 5 | 2.100000  | 14.576397014  | 1.527119204 | 2.662777170  | 0 | 0 | 0 | # | st |
| 114 | 1 | 5 | 2.100000  | 13.895427774  | 5.973370782 | -2.661798097 | 0 | 0 | 0 | # | st |
| 115 | 1 | 5 | 2.100000  | 11.307102986  | 7.381980796 | -2.662777170 | 0 | 0 | 0 | # | st |
| 116 | 1 | 5 | 2.100000  | 13.895452986  | 2.927430796 | -2.662777170 | 0 | 0 | 0 | # | st |
| 117 | 1 | 5 | 2.100000  | 14.576422226  | 7.390279218 | 2.661798097  | 0 | 0 | 0 | # | st |
| 118 | 1 | 5 | 2.100000  | 11.988072226  | 2.935729218 | 2.661798097  | 0 | 0 | 0 | # | st |
| 119 | 1 | 5 | 2.100000  | 11.988047014  | 5.981669204 | 2.662777170  | 0 | 0 | 0 | # | st |
| 120 | 1 | 5 | 2.100000  | 11.307077774  | 1.518820782 | -2.661798097 | 0 | 0 | 0 | # | st |
| 121 | 1 | 1 | 1.575000  | -12.941544971 | 1.474661568 | 0.000270632  | 1 | 0 | 0 | # | ao |
| 122 | 1 | 1 | 1.575000  | -15.529894971 | 5.929211568 | 0.000270632  | 1 | 0 | 0 | # | ao |
| 123 | 1 | 1 | 1.575000  | -12.941955029 | 7.434438432 | -0.000270632 | 1 | 0 | 0 | # | ao |
| 124 | 1 | 1 | 1.575000  | -10.353605029 | 2.979888432 | -0.000270632 | 1 | 0 | 0 | # | ao |
| 125 | 1 | 2 | 0.425000  | -11.795449128 | 4.457267322 | 1.486115063  | 1 | 0 | 0 | # | ho |
| 126 | 1 | 2 | 0.425000  | -14.383799128 | 0.002717322 | 1.486115063  | 1 | 0 | 0 | # | ho |
| 127 | 1 | 2 | 0.425000  | -14.088050872 | 4.451832678 | -1.486115063 | 1 | 0 | 0 | # | ho |
| 128 | 1 | 2 | 0.425000  | -11.499700872 | 8.906382678 | -1.486115063 | 1 | 0 | 0 | # | ho |
| 129 | 1 | 3 | -1.050000 | -14.548785345 | 1.677501481 | -1.033422068 | 1 | 0 | 0 | # | ob |
| 130 | 1 | 3 | -1.050000 | -10.506582736 | 6.305096126 | -3.231846262 | 1 | 0 | 0 | # | ob |
| 131 | 1 | 3 | -1.050000 | -11.959855513 | 2.773649320 | -1.033631378 | 1 | 0 | 0 | # | ob |
| 132 | 1 | 3 | -1.050000 | -13.095260908 | 7.048710300 | -3.233079711 | 1 | 0 | 0 | # | ob |
| 133 | 1 | 3 | -1.050000 | -14.548205513 | 7.228199320 | -1.033631378 | 1 | 0 | 0 | # | ob |

|     |   |   |           |               |             |              |   |   |   |   |    |
|-----|---|---|-----------|---------------|-------------|--------------|---|---|---|---|----|
| 134 | 1 | 3 | -1.050000 | -13.923644487 | 6.135450680 | 1.033631378  | 1 | 0 | 0 | # | ob |
| 135 | 1 | 3 | -1.050000 | -10.506910908 | 2.594160300 | -3.233079711 | 1 | 0 | 0 | # | ob |
| 136 | 1 | 3 | -1.050000 | -13.923064655 | 2.777048519 | 1.033422068  | 1 | 0 | 0 | # | ob |
| 137 | 1 | 3 | -1.050000 | -12.788567264 | 7.058553874 | 3.231846262  | 1 | 0 | 0 | # | ob |
| 138 | 1 | 3 | -1.050000 | -11.334714655 | 7.231598519 | 1.033422068  | 1 | 0 | 0 | # | ob |
| 139 | 1 | 3 | -1.050000 | -15.376917264 | 2.604003874 | 3.231846262  | 1 | 0 | 0 | # | ob |
| 140 | 1 | 3 | -1.050000 | -12.788239092 | 1.860389700 | 3.233079711  | 1 | 0 | 0 | # | ob |
| 141 | 1 | 4 | -0.950000 | -13.530842343 | 0.000940996 | 1.012582885  | 1 | 0 | 0 | # | oh |
| 142 | 1 | 3 | -1.050000 | -10.863018349 | 0.003976970 | 3.061482417  | 1 | 0 | 0 | # | ob |
| 143 | 1 | 4 | -0.950000 | -10.942492343 | 4.455490996 | 1.012582885  | 1 | 0 | 0 | # | oh |
| 144 | 1 | 3 | -1.050000 | -13.451368349 | 4.458526970 | 3.061482417  | 1 | 0 | 0 | # | ob |
| 145 | 1 | 4 | -0.950000 | -12.352657657 | 8.908159004 | -1.012582885 | 1 | 0 | 0 | # | oh |
| 146 | 1 | 3 | -1.050000 | -15.020481651 | 8.905123030 | -3.061482417 | 1 | 0 | 0 | # | ob |
| 147 | 1 | 4 | -0.950000 | -14.941007657 | 4.453609004 | -1.012582885 | 1 | 0 | 0 | # | oh |
| 148 | 1 | 3 | -1.050000 | -12.432131651 | 4.450573030 | -3.061482417 | 1 | 0 | 0 | # | ob |
| 149 | 1 | 3 | -1.050000 | -11.335294487 | 1.680900680 | 1.033631378  | 1 | 0 | 0 | # | ob |
| 150 | 1 | 3 | -1.050000 | -15.376589092 | 6.314939700 | 3.233079711  | 1 | 0 | 0 | # | ob |
| 151 | 1 | 3 | -1.050000 | -11.960435345 | 6.132051481 | -1.033422068 | 1 | 0 | 0 | # | ob |
| 152 | 1 | 3 | -1.050000 | -13.094932736 | 1.850546126 | -3.231846262 | 1 | 0 | 0 | # | ob |
| 153 | 1 | 5 | 2.100000  | -11.307102986 | 1.527119204 | 2.662777170  | 1 | 0 | 0 | # | st |
| 154 | 1 | 5 | 2.100000  | -11.988072226 | 5.973370782 | -2.661798097 | 1 | 0 | 0 | # | st |
| 155 | 1 | 5 | 2.100000  | -14.576397014 | 7.381980796 | -2.662777170 | 1 | 0 | 0 | # | st |
| 156 | 1 | 5 | 2.100000  | -11.988047014 | 2.927430796 | -2.662777170 | 1 | 0 | 0 | # | st |
| 157 | 1 | 5 | 2.100000  | -11.307077774 | 7.390279218 | 2.661798097  | 1 | 0 | 0 | # | st |
| 158 | 1 | 5 | 2.100000  | -13.895427774 | 2.935729218 | 2.661798097  | 1 | 0 | 0 | # | st |
| 159 | 1 | 5 | 2.100000  | -13.895452986 | 5.981669204 | 2.662777170  | 1 | 0 | 0 | # | st |
| 160 | 1 | 5 | 2.100000  | -14.576422226 | 1.518820782 | -2.661798097 | 1 | 0 | 0 | # | st |
| 161 | 1 | 1 | 1.575000  | -7.764844971  | 1.474661568 | 0.000270632  | 1 | 0 | 0 | # | ao |
| 162 | 1 | 1 | 1.575000  | -10.353194971 | 5.929211568 | 0.000270632  | 1 | 0 | 0 | # | ao |
| 163 | 1 | 1 | 1.575000  | -7.765255029  | 7.434438432 | -0.000270632 | 1 | 0 | 0 | # | ao |
| 164 | 1 | 1 | 1.575000  | -5.176905029  | 2.979888432 | -0.000270632 | 1 | 0 | 0 | # | ao |
| 165 | 1 | 2 | 0.425000  | -6.618749128  | 4.457267322 | 1.486115063  | 1 | 0 | 0 | # | ho |
| 166 | 1 | 2 | 0.425000  | -9.207099128  | 0.002717322 | 1.486115063  | 1 | 0 | 0 | # | ho |
| 167 | 1 | 2 | 0.425000  | -8.911350872  | 4.451832678 | -1.486115063 | 1 | 0 | 0 | # | ho |
| 168 | 1 | 2 | 0.425000  | -6.323000872  | 8.906382678 | -1.486115063 | 1 | 0 | 0 | # | ho |
| 169 | 1 | 3 | -1.050000 | -9.372085345  | 1.677501481 | -1.033422068 | 1 | 0 | 0 | # | ob |
| 170 | 1 | 3 | -1.050000 | -5.329882736  | 6.305096126 | -3.231846262 | 1 | 0 | 0 | # | ob |
| 171 | 1 | 3 | -1.050000 | -6.783155513  | 2.773649320 | -1.033631378 | 1 | 0 | 0 | # | ob |
| 172 | 1 | 3 | -1.050000 | -7.918569098  | 7.048710300 | -3.233079711 | 1 | 0 | 0 | # | ob |
| 173 | 1 | 3 | -1.050000 | -9.371505513  | 7.228199320 | -1.033631378 | 1 | 0 | 0 | # | ob |
| 174 | 1 | 3 | -1.050000 | -8.746944487  | 6.135450680 | 1.033631378  | 1 | 0 | 0 | # | ob |
| 175 | 1 | 3 | -1.050000 | -5.330210908  | 2.594160300 | -3.233079711 | 1 | 0 | 0 | # | ob |
| 176 | 1 | 3 | -1.050000 | -8.746364655  | 2.777048519 | 1.033422068  | 1 | 0 | 0 | # | ob |
| 177 | 1 | 3 | -1.050000 | -7.611867264  | 7.058553874 | 3.231846262  | 1 | 0 | 0 | # | ob |
| 178 | 1 | 3 | -1.050000 | -6.158014655  | 7.231598519 | 1.033422068  | 1 | 0 | 0 | # | ob |
| 179 | 1 | 3 | -1.050000 | -10.200217264 | 2.604003874 | 3.231846262  | 1 | 0 | 0 | # | ob |
| 180 | 1 | 3 | -1.050000 | -7.611539092  | 1.860389700 | 3.233079711  | 1 | 0 | 0 | # | ob |
| 181 | 1 | 4 | -0.950000 | -8.354142343  | 0.000940996 | 1.012582885  | 1 | 0 | 0 | # | oh |
| 182 | 1 | 3 | -1.050000 | -5.686318349  | 0.003976970 | 3.061482417  | 1 | 0 | 0 | # | ob |
| 183 | 1 | 4 | -0.950000 | -5.765792343  | 4.455490996 | 1.012582885  | 1 | 0 | 0 | # | oh |
| 184 | 1 | 3 | -1.050000 | -8.274668349  | 4.458526970 | 3.061482417  | 1 | 0 | 0 | # | ob |
| 185 | 1 | 4 | -0.950000 | -7.175957657  | 8.908159004 | -1.012582885 | 1 | 0 | 0 | # | oh |
| 186 | 1 | 3 | -1.050000 | -9.843781651  | 8.905123030 | -3.061482417 | 1 | 0 | 0 | # | ob |
| 187 | 1 | 4 | -0.950000 | -9.764307657  | 4.453609004 | -1.012582885 | 1 | 0 | 0 | # | oh |
| 188 | 1 | 3 | -1.050000 | -7.255341651  | 4.450573030 | -3.061482417 | 1 | 0 | 0 | # | ob |
| 189 | 1 | 3 | -1.050000 | -6.158594487  | 1.680900680 | 1.033631378  | 1 | 0 | 0 | # | ob |
| 190 | 1 | 3 | -1.050000 | -10.199889092 | 6.314939700 | 3.233079711  | 1 | 0 | 0 | # | ob |
| 191 | 1 | 3 | -1.050000 | -6.783735345  | 6.132051481 | -1.033422068 | 1 | 0 | 0 | # | ob |
| 192 | 1 | 3 | -1.050000 | -7.918232736  | 1.850546126 | -3.231846262 | 1 | 0 | 0 | # | ob |
| 193 | 1 | 5 | 2.100000  | -6.130402986  | 1.527119204 | 2.662777170  | 1 | 0 | 0 | # | st |
| 194 | 1 | 5 | 2.100000  | -6.811372226  | 5.973370782 | -2.661798097 | 1 | 0 | 0 | # | st |
| 195 | 1 | 5 | 2.100000  | -9.399697014  | 7.381980796 | -2.662777170 | 1 | 0 | 0 | # | st |
| 196 | 1 | 5 | 2.100000  | -6.811347014  | 2.927430796 | -2.662777170 | 1 | 0 | 0 | # | st |
| 197 | 1 | 5 | 2.100000  | -6.130377774  | 7.390279218 | 2.661798097  | 1 | 0 | 0 | # | st |
| 198 | 1 | 5 | 2.100000  | -8.718727774  | 2.935729218 | 2.661798097  | 1 | 0 | 0 | # | st |
| 199 | 1 | 5 | 2.100000  | -8.718752986  | 5.981669204 | 2.662777170  | 1 | 0 | 0 | # | st |
| 200 | 1 | 5 | 2.100000  | -9.399722226  | 1.518820782 | -2.661798097 | 1 | 0 | 0 | # | st |
| 201 | 1 | 1 | 1.575000  | -2.588144971  | 1.474661568 | 0.000270632  | 1 | 0 | 0 | # | ao |
| 202 | 1 | 1 | 1.575000  | -5.176494971  | 5.929211568 | 0.000270632  | 1 | 0 | 0 | # | ao |
| 203 | 1 | 1 | 1.575000  | -2.588555029  | 7.434438432 | -0.000270632 | 1 | 0 | 0 | # | ao |
| 204 | 1 | 1 | 1.575000  | -0.000205029  | 2.979888432 | -0.000270632 | 1 | 0 | 0 | # | ao |
| 205 | 1 | 2 | 0.425000  | -1.442049128  | 4.457267322 | 1.486115063  | 1 | 0 | 0 | # | ho |
| 206 | 1 | 2 | 0.425000  | -4.030399128  | 0.002717322 | 1.486115063  | 1 | 0 | 0 | # | ho |
| 207 | 1 | 2 | 0.425000  | -3.734650872  | 4.451832678 | -1.486115063 | 1 | 0 | 0 | # | ho |
| 208 | 1 | 2 | 0.425000  | -1.146300872  | 8.906382678 | -1.486115063 | 1 | 0 | 0 | # | ho |
| 209 | 1 | 3 | -1.050000 | -4.195385345  | 1.677501481 | -1.033422068 | 1 | 0 | 0 | # | ob |
| 210 | 1 | 3 | -1.050000 | -0.153182736  | 6.305096126 | -3.231846262 | 1 | 0 | 0 | # | ob |
| 211 | 1 | 3 | -1.050000 | -1.606455513  | 2.773649320 | -1.033631378 | 1 | 0 | 0 | # | ob |
| 212 | 1 | 3 | -1.050000 | -2.741869098  | 7.048710300 | -3.233079711 | 1 | 0 | 0 | # | ob |
| 213 | 1 | 3 | -1.050000 | -4.194805513  | 7.228199320 | -1.033631378 | 1 | 0 | 0 | # | ob |
| 214 | 1 | 3 | -1.050000 | -3.570244487  | 6.135450680 | 1.033631378  | 1 | 0 | 0 | # | ob |
| 215 | 1 | 3 | -1.050000 | -0.153510908  | 2.594160300 | -3.233079711 | 1 | 0 | 0 | # | ob |
| 216 | 1 | 3 | -1.050000 | -3.569664655  | 2.777048519 | 1.033422068  | 1 | 0 | 0 | # | ob |
| 217 | 1 | 3 | -1.050000 | -2.435167264  | 7.058553874 | 3.231846262  | 1 | 0 | 0 | # | ob |
| 218 | 1 | 3 | -1.050000 | -0.981314655  | 7.231598519 | 1.033422068  | 1 | 0 | 0 | # | ob |
| 219 | 1 | 3 | -1.050000 | -5.023517264  | 2.604003874 | 3.231846262  | 1 | 0 | 0 | # | ob |
| 220 | 1 | 3 | -1.050000 | -2.434839092  | 1.860389700 | 3.233079711  | 1 | 0 | 0 | # | ob |
| 221 | 1 | 4 | -0.950000 | -3.177442343  | 0.000940996 | 1.012582885  | 1 | 0 | 0 | # | oh |
| 222 | 1 | 3 | -1.050000 | -0.509618349  | 0.003976970 | 3.061482417  | 1 | 0 | 0 | # | ob |
| 223 | 1 | 4 | -0.950000 | -0.589092343  | 4.455490996 | 1.012582885  | 1 | 0 | 0 | # | oh |
| 224 | 1 | 3 | -1.050000 | -3.097968349  | 4.458526970 | 3.061482417  | 1 | 0 | 0 | # | ob |
| 225 | 1 | 4 | -0.950000 | -1.999257657  | 8.908159004 | -1.012582885 | 1 | 0 | 0 | # | oh |
| 226 | 1 | 3 | -1.050000 | -4.667081651  | 8.905123030 | -3.061482417 | 1 | 0 | 0 | # | ob |

|     |   |   |           |              |              |              |   |   |   |    |
|-----|---|---|-----------|--------------|--------------|--------------|---|---|---|----|
| 227 | 1 | 4 | -0.950000 | -4.587607657 | 4.453609004  | -1.012582885 | 1 | 0 | 0 | oh |
| 228 | 1 | 3 | -1.050000 | -2.078731651 | 4.450573030  | -3.061482417 | 1 | 0 | 0 | ob |
| 229 | 1 | 3 | -1.050000 | -0.981894487 | 1.680900680  | 1.033631378  | 1 | 0 | 0 | ob |
| 230 | 1 | 3 | -1.050000 | -5.023189092 | 6.314939700  | 3.233079711  | 1 | 0 | 0 | ob |
| 231 | 1 | 3 | -1.050000 | -1.607035345 | 6.132051481  | -1.033422068 | 1 | 0 | 0 | ob |
| 232 | 1 | 3 | -1.050000 | -2.741532736 | 1.850546126  | -3.231846262 | 1 | 0 | 0 | ob |
| 233 | 1 | 5 | 2.100000  | -0.953702986 | 1.527119204  | 2.662777170  | 1 | 0 | 0 | st |
| 234 | 1 | 5 | 2.100000  | -1.634672226 | 5.973370782  | -2.661798097 | 1 | 0 | 0 | st |
| 235 | 1 | 5 | 2.100000  | -4.222997014 | 7.381980796  | -2.662777170 | 1 | 0 | 0 | st |
| 236 | 1 | 5 | 2.100000  | -1.634647014 | 2.927430796  | -2.662777170 | 1 | 0 | 0 | st |
| 237 | 1 | 5 | 2.100000  | -0.953677774 | 7.390279218  | 2.661798097  | 1 | 0 | 0 | st |
| 238 | 1 | 5 | 2.100000  | -3.542027774 | 2.935729218  | 2.661798097  | 1 | 0 | 0 | st |
| 239 | 1 | 5 | 2.100000  | -3.542052986 | 5.981669204  | 2.662777170  | 1 | 0 | 0 | st |
| 240 | 1 | 5 | 2.100000  | -4.223022226 | 1.518820782  | -2.661798097 | 1 | 0 | 0 | st |
| 241 | 1 | 1 | 1.575000  | 2.588555029  | 10.383761568 | 0.000270632  | 0 | 0 | 0 | ao |
| 242 | 1 | 1 | 1.575000  | 0.000205029  | 14.838311568 | 0.000270632  | 0 | 0 | 0 | ao |
| 243 | 1 | 1 | 1.575000  | 2.588144971  | 16.343538432 | -0.000270632 | 0 | 0 | 0 | ao |
| 244 | 1 | 1 | 1.575000  | 5.176494971  | 11.888988432 | -0.000270632 | 0 | 0 | 0 | ao |
| 245 | 1 | 2 | 0.425000  | 3.734650872  | 13.366367322 | 1.486115063  | 0 | 0 | 0 | ho |
| 246 | 1 | 2 | 0.425000  | 1.146300872  | 8.911817322  | 1.486115063  | 0 | 0 | 0 | ho |
| 247 | 1 | 2 | 0.425000  | 1.442049128  | 13.360932678 | -1.486115063 | 0 | 0 | 0 | ho |
| 248 | 1 | 2 | 0.425000  | 4.030399128  | 17.815482678 | -1.486115063 | 0 | 0 | 0 | ho |
| 249 | 1 | 3 | -1.050000 | 0.981314655  | 10.586601481 | -1.033422068 | 0 | 0 | 0 | ob |
| 250 | 1 | 3 | -1.050000 | 5.023517264  | 15.214196126 | -3.231846262 | 0 | 0 | 0 | ob |
| 251 | 1 | 3 | -1.050000 | 3.570244487  | 11.682749320 | -1.033631378 | 0 | 0 | 0 | ob |
| 252 | 1 | 3 | -1.050000 | 2.434839092  | 15.957810300 | -3.233079711 | 0 | 0 | 0 | ob |
| 253 | 1 | 3 | -1.050000 | 0.981894487  | 16.137299320 | -1.033631378 | 0 | 0 | 0 | ob |
| 254 | 1 | 3 | -1.050000 | 1.606455513  | 15.044550680 | 1.033631378  | 0 | 0 | 0 | ob |
| 255 | 1 | 3 | -1.050000 | 5.023189092  | 11.503260300 | -3.233079711 | 0 | 0 | 0 | ob |
| 256 | 1 | 3 | -1.050000 | 1.607035345  | 11.686148519 | 1.033422068  | 0 | 0 | 0 | ob |
| 257 | 1 | 3 | -1.050000 | 2.741532736  | 15.967653874 | 3.231846262  | 0 | 0 | 0 | ob |
| 258 | 1 | 3 | -1.050000 | 4.195385345  | 16.140698519 | 1.033422068  | 0 | 0 | 0 | ob |
| 259 | 1 | 3 | -1.050000 | 0.153182736  | 11.513103874 | 3.231846262  | 0 | 0 | 0 | ob |
| 260 | 1 | 3 | -1.050000 | 2.741860908  | 10.769489700 | 3.233079711  | 0 | 0 | 0 | ob |
| 261 | 1 | 4 | -0.950000 | 1.999257657  | 8.910040996  | 1.012582885  | 0 | 0 | 0 | oh |
| 262 | 1 | 3 | -1.050000 | 4.667081651  | 8.913076970  | 3.061482417  | 0 | 0 | 0 | ob |
| 263 | 1 | 4 | -0.950000 | 4.587607657  | 13.364590996 | 1.012582885  | 0 | 0 | 0 | oh |
| 264 | 1 | 3 | -1.050000 | 2.078731651  | 13.367626970 | 3.061482417  | 0 | 0 | 0 | ob |
| 265 | 1 | 4 | -0.950000 | 3.177442343  | 17.817259004 | -1.012582885 | 0 | 0 | 0 | oh |
| 266 | 1 | 3 | -1.050000 | 0.509618349  | 17.814223030 | -3.061482417 | 0 | 0 | 0 | ob |
| 267 | 1 | 4 | -0.950000 | 0.589092343  | 13.362709004 | -1.012582885 | 0 | 0 | 0 | oh |
| 268 | 1 | 3 | -1.050000 | 3.097968349  | 13.359673030 | -3.061482417 | 0 | 0 | 0 | ob |
| 269 | 1 | 3 | -1.050000 | 4.194805513  | 10.590000680 | 1.033631378  | 0 | 0 | 0 | ob |
| 270 | 1 | 3 | -1.050000 | 0.153510908  | 15.224039700 | 3.233079711  | 0 | 0 | 0 | ob |
| 271 | 1 | 3 | -1.050000 | 3.569664655  | 15.041151481 | -1.033422068 | 0 | 0 | 0 | ob |
| 272 | 1 | 3 | -1.050000 | 2.435167264  | 10.759646126 | -3.231846262 | 0 | 0 | 0 | ob |
| 273 | 1 | 5 | 2.100000  | 4.222997014  | 10.436219204 | 2.662777170  | 0 | 0 | 0 | st |
| 274 | 1 | 5 | 2.100000  | 3.542027774  | 14.882470782 | -2.661798097 | 0 | 0 | 0 | st |
| 275 | 1 | 5 | 2.100000  | 0.953702986  | 16.291080796 | -2.662777170 | 0 | 0 | 0 | st |
| 276 | 1 | 5 | 2.100000  | 3.542052986  | 11.836530796 | -2.662777170 | 0 | 0 | 0 | st |
| 277 | 1 | 5 | 2.100000  | 4.223022226  | 16.299379218 | 2.661798097  | 0 | 0 | 0 | st |
| 278 | 1 | 5 | 2.100000  | 1.634672226  | 11.844829218 | 2.661798097  | 0 | 0 | 0 | st |
| 279 | 1 | 5 | 2.100000  | 1.634647014  | 14.890769204 | 2.662777170  | 0 | 0 | 0 | st |
| 280 | 1 | 5 | 2.100000  | 0.953677774  | 10.427920782 | -2.661798097 | 0 | 0 | 0 | st |
| 281 | 1 | 1 | 1.575000  | 7.765255029  | 10.383761568 | 0.000270632  | 0 | 0 | 0 | ao |
| 282 | 1 | 1 | 1.575000  | 5.176905029  | 14.838311568 | 0.000270632  | 0 | 0 | 0 | ao |
| 283 | 1 | 1 | 1.575000  | 7.764844971  | 16.343538432 | -0.000270632 | 0 | 0 | 0 | ao |
| 284 | 1 | 1 | 1.575000  | 10.353194971 | 11.888988432 | -0.000270632 | 0 | 0 | 0 | ao |
| 285 | 1 | 2 | 0.425000  | 8.911350872  | 13.366367322 | 1.486115063  | 0 | 0 | 0 | ho |
| 286 | 1 | 2 | 0.425000  | 6.323000872  | 8.911817322  | 1.486115063  | 0 | 0 | 0 | ho |
| 287 | 1 | 2 | 0.425000  | 6.618749128  | 13.360932678 | -1.486115063 | 0 | 0 | 0 | ho |
| 288 | 1 | 2 | 0.425000  | 9.207099128  | 17.815482678 | -1.486115063 | 0 | 0 | 0 | ho |
| 289 | 1 | 3 | -1.050000 | 6.158014655  | 10.586601481 | -1.033422068 | 0 | 0 | 0 | ob |
| 290 | 1 | 3 | -1.050000 | 10.200217264 | 15.214196126 | -3.231846262 | 0 | 0 | 0 | ob |
| 291 | 1 | 3 | -1.050000 | 8.746944487  | 11.682749320 | -1.033631378 | 0 | 0 | 0 | ob |
| 292 | 1 | 3 | -1.050000 | 7.611539092  | 15.957810300 | -3.233079711 | 0 | 0 | 0 | ob |
| 293 | 1 | 3 | -1.050000 | 6.158594487  | 16.137299320 | -1.033631378 | 0 | 0 | 0 | ob |
| 294 | 1 | 3 | -1.050000 | 6.783155513  | 15.044550680 | 1.033631378  | 0 | 0 | 0 | ob |
| 295 | 1 | 3 | -1.050000 | 10.199889092 | 11.503260300 | -3.233079711 | 0 | 0 | 0 | ob |
| 296 | 1 | 3 | -1.050000 | 6.783735345  | 11.686148519 | 1.033422068  | 0 | 0 | 0 | ob |
| 297 | 1 | 3 | -1.050000 | 7.918232736  | 15.967653874 | 3.231846262  | 0 | 0 | 0 | ob |
| 298 | 1 | 3 | -1.050000 | 9.372085345  | 16.140698519 | 1.033422068  | 0 | 0 | 0 | ob |
| 299 | 1 | 3 | -1.050000 | 5.329882736  | 11.513103874 | 3.231846262  | 0 | 0 | 0 | ob |
| 300 | 1 | 3 | -1.050000 | 7.918560908  | 10.769489700 | 3.233079711  | 0 | 0 | 0 | ob |
| 301 | 1 | 4 | -0.950000 | 7.175957657  | 8.910040996  | 1.012582885  | 0 | 0 | 0 | oh |
| 302 | 1 | 3 | -1.050000 | 9.843781651  | 8.913076970  | 3.061482417  | 0 | 0 | 0 | ob |
| 303 | 1 | 4 | -0.950000 | 9.764307657  | 13.364590996 | 1.012582885  | 0 | 0 | 0 | oh |
| 304 | 1 | 3 | -1.050000 | 7.255431651  | 13.367626970 | 3.061482417  | 0 | 0 | 0 | ob |
| 305 | 1 | 4 | -0.950000 | 8.354142343  | 17.817259004 | -1.012582885 | 0 | 0 | 0 | oh |
| 306 | 1 | 3 | -1.050000 | 5.686318349  | 17.814223030 | -3.061482417 | 0 | 0 | 0 | ob |
| 307 | 1 | 4 | -0.950000 | 5.765792343  | 13.362709004 | -1.012582885 | 0 | 0 | 0 | oh |
| 308 | 1 | 3 | -1.050000 | 8.274668349  | 13.359673030 | -3.061482417 | 0 | 0 | 0 | ob |
| 309 | 1 | 3 | -1.050000 | 9.371505513  | 10.590000680 | 1.033631378  | 0 | 0 | 0 | ob |
| 310 | 1 | 3 | -1.050000 | 5.330210908  | 15.224039700 | 3.233079711  | 0 | 0 | 0 | ob |
| 311 | 1 | 3 | -1.050000 | 8.746364655  | 15.041151481 | -1.033422068 | 0 | 0 | 0 | ob |
| 312 | 1 | 3 | -1.050000 | 7.611867264  | 10.759646126 | -3.231846262 | 0 | 0 | 0 | ob |
| 313 | 1 | 5 | 2.100000  | 9.399697014  | 10.436219204 | 2.662777170  | 0 | 0 | 0 | st |
| 314 | 1 | 5 | 2.100000  | 8.718727774  | 14.882470782 | -2.661798097 | 0 | 0 | 0 | st |
| 315 | 1 | 5 | 2.100000  | 6.130402986  | 16.291080796 | -2.662777170 | 0 | 0 | 0 | st |
| 316 | 1 | 5 | 2.100000  | 8.718752986  | 11.836530796 | -2.662777170 | 0 | 0 | 0 | st |
| 317 | 1 | 5 | 2.100000  | 9.399722226  | 16.299379218 | 2.661798097  | 0 | 0 | 0 | st |
| 318 | 1 | 5 | 2.100000  | 6.811372226  | 11.844829218 | 2.661798097  | 0 | 0 | 0 | st |
| 319 | 1 | 5 | 2.100000  | 6.811347014  | 14.890769204 | 2.662777170  | 0 | 0 | 0 | st |

|     |   |   |           |               |              |              |   |   |   |   |    |
|-----|---|---|-----------|---------------|--------------|--------------|---|---|---|---|----|
| 320 | 1 | 5 | 2.100000  | 6.130377774   | 10.427920782 | -2.661798097 | 0 | 0 | 0 | # | st |
| 321 | 1 | 1 | 1.575000  | 12.941955029  | 10.383761568 | 0.000270632  | 0 | 0 | 0 | # | ao |
| 322 | 1 | 1 | 1.575000  | 10.353605029  | 14.838311568 | 0.000270632  | 0 | 0 | 0 | # | ao |
| 323 | 1 | 1 | 1.575000  | 12.941544971  | 16.343538432 | -0.000270632 | 0 | 0 | 0 | # | ao |
| 324 | 1 | 1 | 1.575000  | 15.529894971  | 11.888988432 | -0.000270632 | 0 | 0 | 0 | # | ao |
| 325 | 1 | 2 | 0.425000  | 14.088050872  | 13.366367322 | 1.486115063  | 0 | 0 | 0 | # | ho |
| 326 | 1 | 2 | 0.425000  | 11.499700872  | 8.911817322  | 1.486115063  | 0 | 0 | 0 | # | ho |
| 327 | 1 | 2 | 0.425000  | 11.795449128  | 13.360932678 | -1.486115063 | 0 | 0 | 0 | # | ho |
| 328 | 1 | 2 | 0.425000  | 14.383799128  | 17.815482678 | -1.486115063 | 0 | 0 | 0 | # | ho |
| 329 | 1 | 3 | -1.050000 | 11.334714655  | 10.586601481 | -1.033422068 | 0 | 0 | 0 | # | ob |
| 330 | 1 | 3 | -1.050000 | 15.376917264  | 15.214196126 | -3.231846262 | 0 | 0 | 0 | # | ob |
| 331 | 1 | 3 | -1.050000 | 13.923644487  | 11.682749320 | -1.033631378 | 0 | 0 | 0 | # | ob |
| 332 | 1 | 3 | -1.050000 | 12.788239092  | 15.957810300 | -3.233079711 | 0 | 0 | 0 | # | ob |
| 333 | 1 | 3 | -1.050000 | 11.335294487  | 16.137299320 | -1.033631378 | 0 | 0 | 0 | # | ob |
| 334 | 1 | 3 | -1.050000 | 11.959855513  | 15.044550680 | 1.033631378  | 0 | 0 | 0 | # | ob |
| 335 | 1 | 3 | -1.050000 | 15.376589092  | 11.503260300 | -3.233079711 | 0 | 0 | 0 | # | ob |
| 336 | 1 | 3 | -1.050000 | 11.960435345  | 11.686148519 | 1.033422068  | 0 | 0 | 0 | # | ob |
| 337 | 1 | 3 | -1.050000 | 13.094932736  | 15.967653874 | 3.231846262  | 0 | 0 | 0 | # | ob |
| 338 | 1 | 3 | -1.050000 | 14.548785345  | 16.140698519 | 1.033422068  | 0 | 0 | 0 | # | ob |
| 339 | 1 | 3 | -1.050000 | 10.506582736  | 11.513103874 | 3.231846262  | 0 | 0 | 0 | # | ob |
| 340 | 1 | 3 | -1.050000 | 13.095260908  | 10.769489700 | 3.233079711  | 0 | 0 | 0 | # | ob |
| 341 | 1 | 4 | -0.950000 | 12.352657657  | 8.910040996  | 1.012582885  | 0 | 0 | 0 | # | oh |
| 342 | 1 | 3 | -1.050000 | 15.020481651  | 8.913076970  | 3.061482417  | 0 | 0 | 0 | # | ob |
| 343 | 1 | 4 | -0.950000 | 14.941007657  | 13.364590996 | 1.012582885  | 0 | 0 | 0 | # | oh |
| 344 | 1 | 3 | -1.050000 | 12.432131651  | 13.367626970 | 3.061482417  | 0 | 0 | 0 | # | ob |
| 345 | 1 | 4 | -0.950000 | 13.530842343  | 17.817259004 | -1.012582885 | 0 | 0 | 0 | # | oh |
| 346 | 1 | 3 | -1.050000 | 10.863018349  | 17.814223030 | -3.061482417 | 0 | 0 | 0 | # | ob |
| 347 | 1 | 4 | -0.950000 | 10.942492343  | 13.362709004 | -1.012582885 | 0 | 0 | 0 | # | oh |
| 348 | 1 | 3 | -1.050000 | 13.451368349  | 13.359673030 | -3.061482417 | 0 | 0 | 0 | # | ob |
| 349 | 1 | 3 | -1.050000 | 14.548205513  | 10.590000680 | 1.033631378  | 0 | 0 | 0 | # | ob |
| 350 | 1 | 3 | -1.050000 | 10.506910908  | 15.224039700 | 3.233079711  | 0 | 0 | 0 | # | ob |
| 351 | 1 | 3 | -1.050000 | 13.923064655  | 15.041151481 | -1.033422068 | 0 | 0 | 0 | # | ob |
| 352 | 1 | 3 | -1.050000 | 12.788567264  | 10.759646126 | -3.231846262 | 0 | 0 | 0 | # | ob |
| 353 | 1 | 5 | 2.100000  | 14.576397014  | 10.436219204 | 2.662777170  | 0 | 0 | 0 | # | st |
| 354 | 1 | 5 | 2.100000  | 13.895427774  | 14.882470782 | -2.661798097 | 0 | 0 | 0 | # | st |
| 355 | 1 | 5 | 2.100000  | 11.307102986  | 16.291080796 | -2.662777170 | 0 | 0 | 0 | # | st |
| 356 | 1 | 5 | 2.100000  | 13.895452986  | 11.836530796 | -2.662777170 | 0 | 0 | 0 | # | st |
| 357 | 1 | 5 | 2.100000  | 14.576422226  | 16.299379218 | 2.661798097  | 0 | 0 | 0 | # | st |
| 358 | 1 | 5 | 2.100000  | 11.988072226  | 11.844829218 | 2.661798097  | 0 | 0 | 0 | # | st |
| 359 | 1 | 5 | 2.100000  | 11.988047014  | 14.890769204 | 2.662777170  | 0 | 0 | 0 | # | st |
| 360 | 1 | 5 | 2.100000  | 11.307077774  | 10.427920782 | -2.661798097 | 0 | 0 | 0 | # | st |
| 361 | 1 | 1 | 1.575000  | -12.941544971 | 10.383761568 | 0.000270632  | 1 | 0 | 0 | # | ao |
| 362 | 1 | 1 | 1.575000  | -15.529894971 | 14.838311568 | 0.000270632  | 1 | 0 | 0 | # | ao |
| 363 | 1 | 1 | 1.575000  | -12.941955029 | 16.343538432 | -0.000270632 | 1 | 0 | 0 | # | ao |
| 364 | 1 | 1 | 1.575000  | -10.353605029 | 11.888988432 | -0.000270632 | 1 | 0 | 0 | # | ao |
| 365 | 1 | 2 | 0.425000  | -11.795449128 | 13.366367322 | 1.486115063  | 1 | 0 | 0 | # | ho |
| 366 | 1 | 2 | 0.425000  | -14.383799128 | 8.911817322  | 1.486115063  | 1 | 0 | 0 | # | ho |
| 367 | 1 | 2 | 0.425000  | -14.088050872 | 13.360932678 | -1.486115063 | 1 | 0 | 0 | # | ho |
| 368 | 1 | 2 | 0.425000  | -11.499700872 | 17.815482678 | -1.486115063 | 1 | 0 | 0 | # | ho |
| 369 | 1 | 3 | -1.050000 | -14.548785345 | 10.586601481 | -1.033422068 | 1 | 0 | 0 | # | ob |
| 370 | 1 | 3 | -1.050000 | -10.506582736 | 15.214196126 | -3.231846262 | 1 | 0 | 0 | # | ob |
| 371 | 1 | 3 | -1.050000 | -11.959855513 | 11.682749320 | -1.033631378 | 1 | 0 | 0 | # | ob |
| 372 | 1 | 3 | -1.050000 | -13.095260908 | 15.957810300 | -3.233079711 | 1 | 0 | 0 | # | ob |
| 373 | 1 | 3 | -1.050000 | -14.548205513 | 16.137299320 | -1.033631378 | 1 | 0 | 0 | # | ob |
| 374 | 1 | 3 | -1.050000 | -13.923644487 | 15.044550680 | 1.033631378  | 1 | 0 | 0 | # | ob |
| 375 | 1 | 3 | -1.050000 | -10.506910908 | 11.503260300 | -3.233079711 | 1 | 0 | 0 | # | ob |
| 376 | 1 | 3 | -1.050000 | -13.923064655 | 11.686148519 | 1.033422068  | 1 | 0 | 0 | # | ob |
| 377 | 1 | 3 | -1.050000 | -12.788567264 | 15.967653874 | 3.231846262  | 1 | 0 | 0 | # | ob |
| 378 | 1 | 3 | -1.050000 | -11.334714655 | 16.140698519 | 1.033422068  | 1 | 0 | 0 | # | ob |
| 379 | 1 | 3 | -1.050000 | -15.376917264 | 11.513103874 | 3.231846262  | 1 | 0 | 0 | # | ob |
| 380 | 1 | 3 | -1.050000 | -12.788239092 | 10.769489700 | 3.233079711  | 1 | 0 | 0 | # | ob |
| 381 | 1 | 4 | -0.950000 | -13.530842343 | 8.910040996  | 1.012582885  | 1 | 0 | 0 | # | oh |
| 382 | 1 | 3 | -1.050000 | -10.863018349 | 8.913076970  | 3.061482417  | 1 | 0 | 0 | # | ob |
| 383 | 1 | 4 | -0.950000 | -10.942492343 | 13.364590996 | 1.012582885  | 1 | 0 | 0 | # | oh |
| 384 | 1 | 3 | -1.050000 | -13.451368349 | 13.367626970 | 3.061482417  | 1 | 0 | 0 | # | ob |
| 385 | 1 | 4 | -0.950000 | -12.352657657 | 17.817259004 | -1.012582885 | 1 | 0 | 0 | # | oh |
| 386 | 1 | 3 | -1.050000 | -15.020481651 | 17.814223030 | -3.061482417 | 1 | 0 | 0 | # | ob |
| 387 | 1 | 4 | -0.950000 | -14.941007657 | 13.362709004 | -1.012582885 | 1 | 0 | 0 | # | oh |
| 388 | 1 | 3 | -1.050000 | -12.432131651 | 13.359673030 | -3.061482417 | 1 | 0 | 0 | # | ob |
| 389 | 1 | 3 | -1.050000 | -11.335294487 | 10.590000680 | 1.033631378  | 1 | 0 | 0 | # | ob |
| 390 | 1 | 3 | -1.050000 | -15.376589092 | 15.224039700 | 3.233079711  | 1 | 0 | 0 | # | ob |
| 391 | 1 | 3 | -1.050000 | -11.960435345 | 15.041151481 | -1.033422068 | 1 | 0 | 0 | # | ob |
| 392 | 1 | 3 | -1.050000 | -13.094932736 | 10.759646126 | -3.231846262 | 1 | 0 | 0 | # | ob |
| 393 | 1 | 5 | 2.100000  | -11.307102986 | 10.436219204 | 2.662777170  | 1 | 0 | 0 | # | st |
| 394 | 1 | 5 | 2.100000  | -11.988072226 | 14.882470782 | -2.661798097 | 1 | 0 | 0 | # | st |
| 395 | 1 | 5 | 2.100000  | -14.576397014 | 16.291080796 | -2.662777170 | 1 | 0 | 0 | # | st |
| 396 | 1 | 5 | 2.100000  | -11.988047014 | 11.836530796 | -2.662777170 | 1 | 0 | 0 | # | st |
| 397 | 1 | 5 | 2.100000  | -11.307077774 | 16.299379218 | 2.661798097  | 1 | 0 | 0 | # | st |
| 398 | 1 | 5 | 2.100000  | -13.895427774 | 11.844829218 | 2.661798097  | 1 | 0 | 0 | # | st |
| 399 | 1 | 5 | 2.100000  | -13.895452986 | 14.890769204 | 2.662777170  | 1 | 0 | 0 | # | st |
| 400 | 1 | 5 | 2.100000  | -14.576422226 | 10.427920782 | -2.661798097 | 1 | 0 | 0 | # | st |
| 401 | 1 | 1 | 1.575000  | -7.764844971  | 10.383761568 | 0.000270632  | 1 | 0 | 0 | # | ao |
| 402 | 1 | 1 | 1.575000  | -10.353194971 | 14.838311568 | 0.000270632  | 1 | 0 | 0 | # | ao |
| 403 | 1 | 1 | 1.575000  | -7.765255029  | 16.343538432 | -0.000270632 | 1 | 0 | 0 | # | ao |
| 404 | 1 | 1 | 1.575000  | -5.176905029  | 11.888988432 | -0.000270632 | 1 | 0 | 0 | # | ao |
| 405 | 1 | 2 | 0.425000  | -6.618749128  | 13.366367322 | 1.486115063  | 1 | 0 | 0 | # | ho |
| 406 | 1 | 2 | 0.425000  | -9.207099128  | 8.911817322  | 1.486115063  | 1 | 0 | 0 | # | ho |
| 407 | 1 | 2 | 0.425000  | -8.911350872  | 13.360932678 | -1.486115063 | 1 | 0 | 0 | # | ho |
| 408 | 1 | 2 | 0.425000  | -6.323000872  | 17.815482678 | -1.486115063 | 1 | 0 | 0 | # | ho |
| 409 | 1 | 3 | -1.050000 | -9.372085345  | 10.586601481 | -1.033422068 | 1 | 0 | 0 | # | ob |
| 410 | 1 | 3 | -1.050000 | -5.329882736  | 15.214196126 | -3.231846262 | 1 | 0 | 0 | # | ob |
| 411 | 1 | 3 | -1.050000 | -6.783155513  | 11.682749320 | -1.033631378 | 1 | 0 | 0 | # | ob |
| 412 | 1 | 3 | -1.050000 | -7.918560908  | 15.957810300 | -3.233079711 | 1 | 0 | 0 | # | ob |

|     |   |   |           |               |               |              |   |   |   |   |    |
|-----|---|---|-----------|---------------|---------------|--------------|---|---|---|---|----|
| 413 | 1 | 3 | -1.050000 | -9.371505513  | 16.137299320  | -1.033631378 | 1 | 0 | 0 | # | ob |
| 414 | 1 | 3 | -1.050000 | -8.746944487  | 15.044550680  | 1.033631378  | 1 | 0 | 0 | # | ob |
| 415 | 1 | 3 | -1.050000 | -5.330210908  | 11.503260300  | -3.233079711 | 1 | 0 | 0 | # | ob |
| 416 | 1 | 3 | -1.050000 | -8.746364655  | 11.686148519  | 1.033422068  | 1 | 0 | 0 | # | ob |
| 417 | 1 | 3 | -1.050000 | -7.611867264  | 15.967653874  | 3.231846262  | 1 | 0 | 0 | # | ob |
| 418 | 1 | 3 | -1.050000 | -6.158014655  | 16.140698519  | 1.033422068  | 1 | 0 | 0 | # | ob |
| 419 | 1 | 3 | -1.050000 | -10.200217264 | 11.513103874  | 3.231846262  | 1 | 0 | 0 | # | ob |
| 420 | 1 | 3 | -1.050000 | -7.611539092  | 10.769489700  | 3.233079711  | 1 | 0 | 0 | # | ob |
| 421 | 1 | 4 | -0.950000 | -8.354142343  | 8.910040996   | 1.012582885  | 1 | 0 | 0 | # | oh |
| 422 | 1 | 3 | -1.050000 | -5.686318349  | 8.913076970   | 3.061482417  | 1 | 0 | 0 | # | ob |
| 423 | 1 | 4 | -0.950000 | -5.765792343  | 13.364590996  | 1.012582885  | 1 | 0 | 0 | # | oh |
| 424 | 1 | 3 | -1.050000 | -8.274668349  | 13.367626970  | 3.061482417  | 1 | 0 | 0 | # | ob |
| 425 | 1 | 4 | -0.950000 | -7.175957657  | 17.817259004  | -1.012582885 | 1 | 0 | 0 | # | oh |
| 426 | 1 | 3 | -1.050000 | -9.843781651  | 17.814223030  | -3.061482417 | 1 | 0 | 0 | # | ob |
| 427 | 1 | 4 | -0.950000 | -9.764307657  | 13.362709004  | -1.012582885 | 1 | 0 | 0 | # | oh |
| 428 | 1 | 3 | -1.050000 | -7.255431651  | 13.359673030  | -3.061482417 | 1 | 0 | 0 | # | ob |
| 429 | 1 | 3 | -1.050000 | -6.158594487  | 10.590000680  | 1.033631378  | 1 | 0 | 0 | # | ob |
| 430 | 1 | 3 | -1.050000 | -10.199889092 | 15.224039700  | 3.233079711  | 1 | 0 | 0 | # | ob |
| 431 | 1 | 3 | -1.050000 | -6.783735345  | 15.041151481  | -1.033422068 | 1 | 0 | 0 | # | ob |
| 432 | 1 | 3 | -1.050000 | -7.918232736  | 10.759646126  | -3.231846262 | 1 | 0 | 0 | # | ob |
| 433 | 1 | 5 | 2.100000  | -6.130402986  | 10.436219204  | 2.662777170  | 1 | 0 | 0 | # | st |
| 434 | 1 | 5 | 2.100000  | -6.811372226  | 14.882470782  | -2.661798097 | 1 | 0 | 0 | # | st |
| 435 | 1 | 5 | 2.100000  | -9.399697014  | 16.291080796  | -2.662777170 | 1 | 0 | 0 | # | st |
| 436 | 1 | 5 | 2.100000  | -6.811347014  | 11.836530796  | -2.662777170 | 1 | 0 | 0 | # | st |
| 437 | 1 | 5 | 2.100000  | -6.130377774  | 16.299379218  | 2.661798097  | 1 | 0 | 0 | # | st |
| 438 | 1 | 5 | 2.100000  | -8.718727774  | 11.844829218  | 2.661798097  | 1 | 0 | 0 | # | st |
| 439 | 1 | 5 | 2.100000  | -8.718752986  | 14.890769204  | 2.662777170  | 1 | 0 | 0 | # | st |
| 440 | 1 | 5 | 2.100000  | -9.399722226  | 10.427920782  | -2.661798097 | 1 | 0 | 0 | # | st |
| 441 | 1 | 1 | 1.575000  | -2.588144971  | 10.383761568  | 0.000270632  | 1 | 0 | 0 | # | ao |
| 442 | 1 | 1 | 1.575000  | -5.176494971  | 14.838311568  | 0.000270632  | 1 | 0 | 0 | # | ao |
| 443 | 1 | 1 | 1.575000  | -2.588555029  | 16.343538432  | -0.000270632 | 1 | 0 | 0 | # | ao |
| 444 | 1 | 1 | 1.575000  | -0.000205029  | 11.888988432  | -0.000270632 | 1 | 0 | 0 | # | ao |
| 445 | 1 | 2 | 0.425000  | -1.442049128  | 13.366367322  | 1.486115063  | 1 | 0 | 0 | # | ho |
| 446 | 1 | 2 | 0.425000  | -4.030399128  | 8.911817322   | 1.486115063  | 1 | 0 | 0 | # | ho |
| 447 | 1 | 2 | 0.425000  | -3.734650872  | 13.360932678  | -1.486115063 | 1 | 0 | 0 | # | ho |
| 448 | 1 | 2 | 0.425000  | -1.146300872  | 17.815482678  | -1.486115063 | 1 | 0 | 0 | # | ho |
| 449 | 1 | 3 | -1.050000 | -4.195385345  | 10.586601481  | -1.033422068 | 1 | 0 | 0 | # | ob |
| 450 | 1 | 3 | -1.050000 | -0.153182736  | 15.214196126  | -3.231846262 | 1 | 0 | 0 | # | ob |
| 451 | 1 | 3 | -1.050000 | -1.606455513  | 11.682749320  | -1.033631378 | 1 | 0 | 0 | # | ob |
| 452 | 1 | 3 | -1.050000 | -2.741860908  | 15.957810300  | -3.233079711 | 1 | 0 | 0 | # | ob |
| 453 | 1 | 3 | -1.050000 | -4.194805513  | 16.137299320  | -1.033631378 | 1 | 0 | 0 | # | ob |
| 454 | 1 | 3 | -1.050000 | -3.570244487  | 15.044550680  | 1.033631378  | 1 | 0 | 0 | # | ob |
| 455 | 1 | 3 | -1.050000 | -0.153510908  | 11.503260300  | -3.233079711 | 1 | 0 | 0 | # | ob |
| 456 | 1 | 3 | -1.050000 | -3.569664655  | 11.686148519  | 1.033422068  | 1 | 0 | 0 | # | ob |
| 457 | 1 | 3 | -1.050000 | -2.435167264  | 15.967653874  | 3.231846262  | 1 | 0 | 0 | # | ob |
| 458 | 1 | 3 | -1.050000 | -0.981314655  | 16.140698519  | 1.033422068  | 1 | 0 | 0 | # | ob |
| 459 | 1 | 3 | -1.050000 | -5.023517264  | 11.513103874  | 3.231846262  | 1 | 0 | 0 | # | ob |
| 460 | 1 | 3 | -1.050000 | -2.434839092  | 10.769489700  | 3.233079711  | 1 | 0 | 0 | # | ob |
| 461 | 1 | 4 | -0.950000 | -3.177442343  | 8.910040996   | 1.012582885  | 1 | 0 | 0 | # | oh |
| 462 | 1 | 3 | -1.050000 | -0.509618349  | 8.913076970   | 3.061482417  | 1 | 0 | 0 | # | ob |
| 463 | 1 | 4 | -0.950000 | -0.589092343  | 13.364590996  | 1.012582885  | 1 | 0 | 0 | # | oh |
| 464 | 1 | 3 | -1.050000 | -3.097968349  | 13.367626970  | 3.061482417  | 1 | 0 | 0 | # | ob |
| 465 | 1 | 4 | -0.950000 | -1.999257657  | 17.817259004  | -1.012582885 | 1 | 0 | 0 | # | oh |
| 466 | 1 | 3 | -1.050000 | -4.667081651  | 17.814223030  | -3.061482417 | 1 | 0 | 0 | # | ob |
| 467 | 1 | 4 | -0.950000 | -4.587607657  | 13.362709004  | -1.012582885 | 1 | 0 | 0 | # | oh |
| 468 | 1 | 3 | -1.050000 | -2.078731651  | 13.359673030  | -3.061482417 | 1 | 0 | 0 | # | ob |
| 469 | 1 | 3 | -1.050000 | -0.981894487  | 10.590000680  | 1.033631378  | 1 | 0 | 0 | # | ob |
| 470 | 1 | 3 | -1.050000 | -5.023189092  | 15.224039700  | 3.233079711  | 1 | 0 | 0 | # | ob |
| 471 | 1 | 3 | -1.050000 | -1.607035345  | 15.041151481  | -1.033422068 | 1 | 0 | 0 | # | ob |
| 472 | 1 | 3 | -1.050000 | -2.741532736  | 10.759646126  | -3.231846262 | 1 | 0 | 0 | # | ob |
| 473 | 1 | 5 | 2.100000  | -0.953702986  | 10.436219204  | 2.662777170  | 1 | 0 | 0 | # | st |
| 474 | 1 | 5 | 2.100000  | -1.634672226  | 14.882470782  | -2.661798097 | 1 | 0 | 0 | # | st |
| 475 | 1 | 5 | 2.100000  | -4.222997014  | 16.291080796  | -2.662777170 | 1 | 0 | 0 | # | st |
| 476 | 1 | 5 | 2.100000  | -1.634647014  | 11.836530796  | -2.662777170 | 1 | 0 | 0 | # | st |
| 477 | 1 | 5 | 2.100000  | -0.953677774  | 16.299379218  | 2.661798097  | 1 | 0 | 0 | # | st |
| 478 | 1 | 5 | 2.100000  | -3.542027774  | 11.844829218  | 2.661798097  | 1 | 0 | 0 | # | st |
| 479 | 1 | 5 | 2.100000  | -3.542052986  | 14.890769204  | 2.662777170  | 1 | 0 | 0 | # | st |
| 480 | 1 | 5 | 2.100000  | -4.223022226  | 10.427920782  | -2.661798097 | 1 | 0 | 0 | # | st |
| 481 | 1 | 1 | 1.575000  | 2.588555029   | -16.343538432 | 0.000270632  | 0 | 1 | 0 | # | ao |
| 482 | 1 | 1 | 1.575000  | 0.000205029   | -11.888988432 | 0.000270632  | 0 | 1 | 0 | # | ao |
| 483 | 1 | 1 | 1.575000  | 2.588144971   | -10.383761568 | -0.000270632 | 0 | 1 | 0 | # | ao |
| 484 | 1 | 1 | 1.575000  | 5.176494971   | -14.838311568 | -0.000270632 | 0 | 1 | 0 | # | ao |
| 485 | 1 | 2 | 0.425000  | 3.734650872   | -13.360932678 | 1.486115063  | 0 | 1 | 0 | # | ho |
| 486 | 1 | 2 | 0.425000  | 1.146300872   | -17.815482678 | 1.486115063  | 0 | 1 | 0 | # | ho |
| 487 | 1 | 2 | 0.425000  | 1.442049128   | -13.366367322 | -1.486115063 | 0 | 1 | 0 | # | ho |
| 488 | 1 | 2 | 0.425000  | 4.030399128   | -8.911817322  | -1.486115063 | 0 | 1 | 0 | # | ho |
| 489 | 1 | 3 | -1.050000 | 0.981314655   | -16.140698519 | -1.033422068 | 0 | 1 | 0 | # | ob |
| 490 | 1 | 3 | -1.050000 | 5.023517264   | -11.513103874 | -3.231846262 | 0 | 1 | 0 | # | ob |
| 491 | 1 | 3 | -1.050000 | 3.570244487   | -15.044550680 | -1.033631378 | 0 | 1 | 0 | # | ob |
| 492 | 1 | 3 | -1.050000 | 2.434839092   | -10.769489700 | -3.233079711 | 0 | 1 | 0 | # | ob |
| 493 | 1 | 3 | -1.050000 | 0.981894487   | -10.590000680 | -1.033631378 | 0 | 1 | 0 | # | ob |
| 494 | 1 | 3 | -1.050000 | 1.606455513   | -11.682749320 | 1.033631378  | 0 | 1 | 0 | # | ob |
| 495 | 1 | 3 | -1.050000 | 5.023189092   | -15.224039700 | -3.233079711 | 0 | 1 | 0 | # | ob |
| 496 | 1 | 3 | -1.050000 | 1.607035345   | -15.041151481 | 1.033422068  | 0 | 1 | 0 | # | ob |
| 497 | 1 | 3 | -1.050000 | 2.741532736   | -10.759646126 | 3.231846262  | 0 | 1 | 0 | # | ob |
| 498 | 1 | 3 | -1.050000 | 4.195385345   | -10.586601481 | 1.033422068  | 0 | 1 | 0 | # | ob |
| 499 | 1 | 3 | -1.050000 | 0.153182736   | -15.214196126 | 3.231846262  | 0 | 1 | 0 | # | ob |
| 500 | 1 | 3 | -1.050000 | 2.741860908   | -15.957810300 | 3.233079711  | 0 | 1 | 0 | # | ob |
| 501 | 1 | 4 | -0.950000 | 1.999257657   | -17.817259004 | 1.012582885  | 0 | 1 | 0 | # | oh |
| 502 | 1 | 3 | -1.050000 | 4.667081651   | -17.814223030 | 3.061482417  | 0 | 1 | 0 | # | ob |
| 503 | 1 | 4 | -0.950000 | 4.587607657   | -13.362709004 | 1.012582885  | 0 | 1 | 0 | # | oh |
| 504 | 1 | 3 | -1.050000 | 2.078731651   | -13.359673030 | 3.061482417  | 0 | 1 | 0 | # | ob |
| 505 | 1 | 4 | -0.950000 | 3.177442343   | -8.910040996  | -1.012582885 | 0 | 1 | 0 | # | oh |

|     |   |   |           |              |               |              |   |   |   |   |    |
|-----|---|---|-----------|--------------|---------------|--------------|---|---|---|---|----|
| 506 | 1 | 3 | -1.050000 | 0.509618349  | -8.913076970  | -3.061482417 | 0 | 1 | 0 | # | ob |
| 507 | 1 | 4 | -0.950000 | 0.589092343  | -13.364590996 | -1.012582885 | 0 | 1 | 0 | # | oh |
| 508 | 1 | 3 | -1.050000 | 3.097968349  | -13.367626970 | -3.061482417 | 0 | 1 | 0 | # | ob |
| 509 | 1 | 3 | -1.050000 | 4.194805513  | -16.137299320 | 1.033631378  | 0 | 1 | 0 | # | ob |
| 510 | 1 | 3 | -1.050000 | 0.153510908  | -11.503260300 | 3.233079711  | 0 | 1 | 0 | # | ob |
| 511 | 1 | 3 | -1.050000 | 3.569664655  | -11.686148519 | -1.033422068 | 0 | 1 | 0 | # | ob |
| 512 | 1 | 3 | -1.050000 | 2.435167264  | -15.967653874 | -3.231846262 | 0 | 1 | 0 | # | ob |
| 513 | 1 | 5 | 2.100000  | 4.222997014  | -16.291080796 | 2.662777170  | 0 | 1 | 0 | # | st |
| 514 | 1 | 5 | 2.100000  | 3.542027774  | -11.844829218 | -2.661798097 | 0 | 1 | 0 | # | st |
| 515 | 1 | 5 | 2.100000  | 0.953702986  | -10.436219204 | -2.662777170 | 0 | 1 | 0 | # | st |
| 516 | 1 | 5 | 2.100000  | 3.542052986  | -14.890769204 | -2.662777170 | 0 | 1 | 0 | # | st |
| 517 | 1 | 5 | 2.100000  | 4.223022226  | -10.427920782 | 2.661798097  | 0 | 1 | 0 | # | st |
| 518 | 1 | 5 | 2.100000  | 1.634672226  | -14.882470782 | 2.661798097  | 0 | 1 | 0 | # | st |
| 519 | 1 | 5 | 2.100000  | 1.634647014  | -11.836530796 | 2.662777170  | 0 | 1 | 0 | # | st |
| 520 | 1 | 5 | 2.100000  | 0.953677774  | -16.299379218 | -2.661798097 | 0 | 1 | 0 | # | st |
| 521 | 1 | 1 | 1.575000  | 7.765255029  | -16.343538432 | 0.000270632  | 0 | 1 | 0 | # | ao |
| 522 | 1 | 1 | 1.575000  | 5.176905029  | -11.888988432 | 0.000270632  | 0 | 1 | 0 | # | ao |
| 523 | 1 | 1 | 1.575000  | 7.764844971  | -10.383761568 | -0.000270632 | 0 | 1 | 0 | # | ao |
| 524 | 1 | 1 | 1.575000  | 10.353194971 | -14.838311568 | -0.000270632 | 0 | 1 | 0 | # | ao |
| 525 | 1 | 2 | 0.425000  | 8.911350872  | -13.360932678 | 1.486115063  | 0 | 1 | 0 | # | ho |
| 526 | 1 | 2 | 0.425000  | 6.323000872  | -17.815482678 | 1.486115063  | 0 | 1 | 0 | # | ho |
| 527 | 1 | 2 | 0.425000  | 6.618749128  | -13.366367322 | -1.486115063 | 0 | 1 | 0 | # | ho |
| 528 | 1 | 2 | 0.425000  | 9.207099128  | -8.911817322  | -1.486115063 | 0 | 1 | 0 | # | ho |
| 529 | 1 | 3 | -1.050000 | 6.158014655  | -16.140698519 | -1.033422068 | 0 | 1 | 0 | # | ob |
| 530 | 1 | 3 | -1.050000 | 10.200217264 | -11.513103874 | -3.231846262 | 0 | 1 | 0 | # | ob |
| 531 | 1 | 3 | -1.050000 | 8.746944487  | -15.044550680 | -1.033631378 | 0 | 1 | 0 | # | ob |
| 532 | 1 | 3 | -1.050000 | 7.611539092  | -10.769489700 | -3.233079711 | 0 | 1 | 0 | # | ob |
| 533 | 1 | 3 | -1.050000 | 6.158594487  | -10.590000680 | -1.033631378 | 0 | 1 | 0 | # | ob |
| 534 | 1 | 3 | -1.050000 | 6.783155513  | -11.682749320 | 1.033631378  | 0 | 1 | 0 | # | ob |
| 535 | 1 | 3 | -1.050000 | 10.199889092 | -15.224039700 | -3.233079711 | 0 | 1 | 0 | # | ob |
| 536 | 1 | 3 | -1.050000 | 6.783735345  | -15.041151481 | 1.033422068  | 0 | 1 | 0 | # | ob |
| 537 | 1 | 3 | -1.050000 | 7.918232736  | -10.759646126 | 3.231846262  | 0 | 1 | 0 | # | ob |
| 538 | 1 | 3 | -1.050000 | 9.372085345  | -10.586601481 | 1.033422068  | 0 | 1 | 0 | # | ob |
| 539 | 1 | 3 | -1.050000 | 5.329882736  | -15.214196126 | 3.231846262  | 0 | 1 | 0 | # | ob |
| 540 | 1 | 3 | -1.050000 | 7.918560908  | -15.957810300 | 3.233079711  | 0 | 1 | 0 | # | ob |
| 541 | 1 | 4 | -0.950000 | 7.175957657  | -17.817259004 | 1.012582885  | 0 | 1 | 0 | # | oh |
| 542 | 1 | 3 | -1.050000 | 9.843781651  | -17.814223030 | 3.061482417  | 0 | 1 | 0 | # | ob |
| 543 | 1 | 4 | -0.950000 | 9.764307657  | -13.362709004 | 1.012582885  | 0 | 1 | 0 | # | oh |
| 544 | 1 | 3 | -1.050000 | 7.255431651  | -13.359673030 | 3.061482417  | 0 | 1 | 0 | # | ob |
| 545 | 1 | 4 | -0.950000 | 8.354142343  | -8.910040996  | -1.012582885 | 0 | 1 | 0 | # | oh |
| 546 | 1 | 3 | -1.050000 | 5.686318349  | -8.913076970  | -3.061482417 | 0 | 1 | 0 | # | ob |
| 547 | 1 | 4 | -0.950000 | 5.765792343  | -13.364590996 | -1.012582885 | 0 | 1 | 0 | # | oh |
| 548 | 1 | 3 | -1.050000 | 8.274668349  | -13.367626970 | -3.061482417 | 0 | 1 | 0 | # | ob |
| 549 | 1 | 3 | -1.050000 | 9.371505513  | -16.137299320 | 1.033631378  | 0 | 1 | 0 | # | ob |
| 550 | 1 | 3 | -1.050000 | 5.330210908  | -11.503260300 | 3.233079711  | 0 | 1 | 0 | # | ob |
| 551 | 1 | 3 | -1.050000 | 8.746364655  | -11.686148519 | -1.033422068 | 0 | 1 | 0 | # | ob |
| 552 | 1 | 3 | -1.050000 | 7.611867264  | -15.967653874 | -3.231846262 | 0 | 1 | 0 | # | ob |
| 553 | 1 | 5 | 2.100000  | 9.399697014  | -16.291080796 | 2.662777170  | 0 | 1 | 0 | # | st |
| 554 | 1 | 5 | 2.100000  | 8.718727774  | -11.844829218 | -2.661798097 | 0 | 1 | 0 | # | st |
| 555 | 1 | 5 | 2.100000  | 6.130402986  | -10.436219204 | -2.662777170 | 0 | 1 | 0 | # | st |
| 556 | 1 | 5 | 2.100000  | 8.718752986  | -14.890769204 | -2.662777170 | 0 | 1 | 0 | # | st |
| 557 | 1 | 5 | 2.100000  | 9.399722226  | -10.427920782 | 2.661798097  | 0 | 1 | 0 | # | st |
| 558 | 1 | 5 | 2.100000  | 6.811372226  | -14.882470782 | 2.661798097  | 0 | 1 | 0 | # | st |
| 559 | 1 | 5 | 2.100000  | 6.811347014  | -11.836530796 | 2.662777170  | 0 | 1 | 0 | # | st |
| 560 | 1 | 5 | 2.100000  | 6.130377774  | -16.299379218 | -2.661798097 | 0 | 1 | 0 | # | st |
| 561 | 1 | 1 | 1.575000  | 12.941955029 | -16.343538432 | 0.000270632  | 0 | 1 | 0 | # | ao |
| 562 | 1 | 1 | 1.575000  | 10.353605029 | -11.888988432 | 0.000270632  | 0 | 1 | 0 | # | ao |
| 563 | 1 | 1 | 1.575000  | 12.941544971 | -10.383761568 | -0.000270632 | 0 | 1 | 0 | # | ao |
| 564 | 1 | 1 | 1.575000  | 15.529894971 | -14.838311568 | -0.000270632 | 0 | 1 | 0 | # | ao |
| 565 | 1 | 2 | 0.425000  | 14.088050872 | -13.360932678 | 1.486115063  | 0 | 1 | 0 | # | ho |
| 566 | 1 | 2 | 0.425000  | 11.499700872 | -17.815482678 | 1.486115063  | 0 | 1 | 0 | # | ho |
| 567 | 1 | 2 | 0.425000  | 11.795449128 | -13.366367322 | -1.486115063 | 0 | 1 | 0 | # | ho |
| 568 | 1 | 2 | 0.425000  | 14.383799128 | -8.911817322  | -1.486115063 | 0 | 1 | 0 | # | ho |
| 569 | 1 | 3 | -1.050000 | 11.334714655 | -16.140698519 | -1.033422068 | 0 | 1 | 0 | # | ob |
| 570 | 1 | 3 | -1.050000 | 15.376917264 | -11.513103874 | -3.231846262 | 0 | 1 | 0 | # | ob |
| 571 | 1 | 3 | -1.050000 | 13.923644487 | -15.044550680 | -1.033631378 | 0 | 1 | 0 | # | ob |
| 572 | 1 | 3 | -1.050000 | 12.788239092 | -10.769489700 | -3.233079711 | 0 | 1 | 0 | # | ob |
| 573 | 1 | 3 | -1.050000 | 11.335294487 | -10.590000680 | -1.033631378 | 0 | 1 | 0 | # | ob |
| 574 | 1 | 3 | -1.050000 | 11.959855513 | -11.682749320 | 1.033631378  | 0 | 1 | 0 | # | ob |
| 575 | 1 | 3 | -1.050000 | 15.376589092 | -15.224039700 | -3.233079711 | 0 | 1 | 0 | # | ob |
| 576 | 1 | 3 | -1.050000 | 11.960435345 | -15.041151481 | 1.033422068  | 0 | 1 | 0 | # | ob |
| 577 | 1 | 3 | -1.050000 | 13.094932736 | -10.759646126 | 3.231846262  | 0 | 1 | 0 | # | ob |
| 578 | 1 | 3 | -1.050000 | 14.548785345 | -10.586601481 | 1.033422068  | 0 | 1 | 0 | # | ob |
| 579 | 1 | 3 | -1.050000 | 10.506582736 | -15.214196126 | 3.231846262  | 0 | 1 | 0 | # | ob |
| 580 | 1 | 3 | -1.050000 | 13.095260908 | -15.957810300 | 3.233079711  | 0 | 1 | 0 | # | ob |
| 581 | 1 | 4 | -0.950000 | 12.352657657 | -17.817259004 | 1.012582885  | 0 | 1 | 0 | # | oh |
| 582 | 1 | 3 | -1.050000 | 15.020481651 | -17.814223030 | 3.061482417  | 0 | 1 | 0 | # | ob |
| 583 | 1 | 4 | -0.950000 | 14.941007657 | -13.362709004 | 1.012582885  | 0 | 1 | 0 | # | oh |
| 584 | 1 | 3 | -1.050000 | 12.432131651 | -13.359673030 | 3.061482417  | 0 | 1 | 0 | # | ob |
| 585 | 1 | 4 | -0.950000 | 13.530842343 | -8.910040996  | -1.012582885 | 0 | 1 | 0 | # | oh |
| 586 | 1 | 3 | -1.050000 | 10.863018349 | -8.913076970  | -3.061482417 | 0 | 1 | 0 | # | ob |
| 587 | 1 | 4 | -0.950000 | 10.942492343 | -13.364590996 | -1.012582885 | 0 | 1 | 0 | # | oh |
| 588 | 1 | 3 | -1.050000 | 13.451368349 | -13.367626970 | -3.061482417 | 0 | 1 | 0 | # | ob |
| 589 | 1 | 3 | -1.050000 | 14.548205513 | -16.137299320 | 1.033631378  | 0 | 1 | 0 | # | ob |
| 590 | 1 | 3 | -1.050000 | 10.506910908 | -11.503260300 | 3.233079711  | 0 | 1 | 0 | # | ob |
| 591 | 1 | 3 | -1.050000 | 13.923664655 | -11.686148519 | -1.033422068 | 0 | 1 | 0 | # | ob |
| 592 | 1 | 3 | -1.050000 | 12.788567264 | -15.967653874 | -3.231846262 | 0 | 1 | 0 | # | ob |
| 593 | 1 | 5 | 2.100000  | 14.576397014 | -16.291080796 | 2.662777170  | 0 | 1 | 0 | # | st |
| 594 | 1 | 5 | 2.100000  | 13.895427774 | -11.844829218 | -2.661798097 | 0 | 1 | 0 | # | st |
| 595 | 1 | 5 | 2.100000  | 11.307102986 | -10.436219204 | -2.662777170 | 0 | 1 | 0 | # | st |
| 596 | 1 | 5 | 2.100000  | 13.895452986 | -14.890769204 | -2.662777170 | 0 | 1 | 0 | # | st |
| 597 | 1 | 5 | 2.100000  | 14.576422226 | -10.427920782 | 2.661798097  | 0 | 1 | 0 | # | st |
| 598 | 1 | 5 | 2.100000  | 11.988072226 | -14.882470782 | 2.661798097  | 0 | 1 | 0 | # | st |

|     |   |   |           |               |               |              |   |   |   |   |    |
|-----|---|---|-----------|---------------|---------------|--------------|---|---|---|---|----|
| 599 | 1 | 5 | 2.100000  | 11.988047014  | -11.836530796 | 2.662777170  | 0 | 1 | 0 | # | st |
| 600 | 1 | 5 | 2.100000  | 11.307077774  | -16.299379218 | -2.661798097 | 0 | 1 | 0 | # | st |
| 601 | 1 | 1 | 1.575000  | -12.941544971 | -16.343538432 | 0.000270632  | 1 | 1 | 0 | # | ao |
| 602 | 1 | 1 | 1.575000  | -15.529894971 | -11.888988432 | 0.000270632  | 1 | 1 | 0 | # | ao |
| 603 | 1 | 1 | 1.575000  | -12.941955029 | -10.383761568 | -0.000270632 | 1 | 1 | 0 | # | ao |
| 604 | 1 | 1 | 1.575000  | -10.353605029 | -14.838311568 | -0.000270632 | 1 | 1 | 0 | # | ao |
| 605 | 1 | 2 | 0.425000  | -11.795449128 | -13.360932678 | 1.486115063  | 1 | 1 | 0 | # | ho |
| 606 | 1 | 2 | 0.425000  | -14.383799128 | -17.815482678 | 1.486115063  | 1 | 1 | 0 | # | ho |
| 607 | 1 | 2 | 0.425000  | -14.088050872 | -13.366367322 | -1.486115063 | 1 | 1 | 0 | # | ho |
| 608 | 1 | 2 | 0.425000  | -11.499700872 | -8.911817322  | -1.486115063 | 1 | 1 | 0 | # | ho |
| 609 | 1 | 3 | -1.050000 | -14.548785345 | -16.140698519 | -1.033422068 | 1 | 1 | 0 | # | ob |
| 610 | 1 | 3 | -1.050000 | -10.506582736 | -11.513103874 | -3.231846262 | 1 | 1 | 0 | # | ob |
| 611 | 1 | 3 | -1.050000 | -11.959855513 | -15.044550680 | -1.033631378 | 1 | 1 | 0 | # | ob |
| 612 | 1 | 3 | -1.050000 | -13.095260908 | -10.769489700 | -3.233079711 | 1 | 1 | 0 | # | ob |
| 613 | 1 | 3 | -1.050000 | -14.548205513 | -10.590000680 | -1.033631378 | 1 | 1 | 0 | # | ob |
| 614 | 1 | 3 | -1.050000 | -13.923644487 | -11.682749320 | 1.033631378  | 1 | 1 | 0 | # | ob |
| 615 | 1 | 3 | -1.050000 | -10.506910908 | -15.224039700 | -3.233079711 | 1 | 1 | 0 | # | ob |
| 616 | 1 | 3 | -1.050000 | -13.923064655 | -15.041151481 | 1.033422068  | 1 | 1 | 0 | # | ob |
| 617 | 1 | 3 | -1.050000 | -12.788567264 | -10.759646126 | 3.231846262  | 1 | 1 | 0 | # | ob |
| 618 | 1 | 3 | -1.050000 | -11.334714655 | -10.586601481 | 1.033422068  | 1 | 1 | 0 | # | ob |
| 619 | 1 | 3 | -1.050000 | -15.376917264 | -15.214196126 | 3.231846262  | 1 | 1 | 0 | # | ob |
| 620 | 1 | 3 | -1.050000 | -12.788239092 | -15.957810300 | 3.233079711  | 1 | 1 | 0 | # | ob |
| 621 | 1 | 4 | -0.950000 | -13.530842343 | -17.817259004 | 1.012582885  | 1 | 1 | 0 | # | oh |
| 622 | 1 | 3 | -1.050000 | -10.863018349 | -17.814223030 | 3.061482417  | 1 | 1 | 0 | # | ob |
| 623 | 1 | 4 | -0.950000 | -10.942492343 | -13.362709004 | 1.012582885  | 1 | 1 | 0 | # | oh |
| 624 | 1 | 3 | -1.050000 | -13.451368349 | -13.359673030 | 3.061482417  | 1 | 1 | 0 | # | ob |
| 625 | 1 | 4 | -0.950000 | -12.352657657 | -8.910040996  | -1.012582885 | 1 | 1 | 0 | # | oh |
| 626 | 1 | 3 | -1.050000 | -15.020481651 | -8.913076970  | -3.061482417 | 1 | 1 | 0 | # | ob |
| 627 | 1 | 4 | -0.950000 | -14.941007657 | -13.364590996 | -1.012582885 | 1 | 1 | 0 | # | oh |
| 628 | 1 | 3 | -1.050000 | -12.432131651 | -13.367626970 | -3.061482417 | 1 | 1 | 0 | # | ob |
| 629 | 1 | 3 | -1.050000 | -11.335294487 | -16.137299320 | 1.033631378  | 1 | 1 | 0 | # | ob |
| 630 | 1 | 3 | -1.050000 | -15.376589092 | -11.503260300 | 3.233079711  | 1 | 1 | 0 | # | ob |
| 631 | 1 | 3 | -1.050000 | -11.960435345 | -11.686148519 | -1.033422068 | 1 | 1 | 0 | # | ob |
| 632 | 1 | 3 | -1.050000 | -13.094932736 | -15.967653874 | -3.231846262 | 1 | 1 | 0 | # | ob |
| 633 | 1 | 5 | 2.100000  | -11.307102986 | -16.291080796 | 2.662777170  | 1 | 1 | 0 | # | st |
| 634 | 1 | 5 | 2.100000  | -11.988072226 | -11.844829218 | -2.661798097 | 1 | 1 | 0 | # | st |
| 635 | 1 | 5 | 2.100000  | -14.576397014 | -10.436219204 | -2.662777170 | 1 | 1 | 0 | # | st |
| 636 | 1 | 5 | 2.100000  | -11.988047014 | -14.890769204 | -2.662777170 | 1 | 1 | 0 | # | st |
| 637 | 1 | 5 | 2.100000  | -11.307077774 | -10.427920782 | 2.661798097  | 1 | 1 | 0 | # | st |
| 638 | 1 | 5 | 2.100000  | -13.895427774 | -14.882470782 | 2.661798097  | 1 | 1 | 0 | # | st |
| 639 | 1 | 5 | 2.100000  | -13.895425986 | -11.836530796 | 2.662777170  | 1 | 1 | 0 | # | st |
| 640 | 1 | 5 | 2.100000  | -14.576422226 | -16.299379218 | -2.661798097 | 1 | 1 | 0 | # | st |
| 641 | 1 | 1 | 1.575000  | -7.764844971  | -16.343538432 | 0.000270632  | 1 | 1 | 0 | # | ao |
| 642 | 1 | 1 | 1.575000  | -10.353194971 | -11.888988432 | 0.000270632  | 1 | 1 | 0 | # | ao |
| 643 | 1 | 1 | 1.575000  | -7.765255029  | -10.383761568 | -0.000270632 | 1 | 1 | 0 | # | ao |
| 644 | 1 | 1 | 1.575000  | -5.176905029  | -14.838311568 | -0.000270632 | 1 | 1 | 0 | # | ao |
| 645 | 1 | 2 | 0.425000  | -6.618749128  | -13.360932678 | 1.486115063  | 1 | 1 | 0 | # | ho |
| 646 | 1 | 2 | 0.425000  | -9.207099128  | -17.815482678 | 1.486115063  | 1 | 1 | 0 | # | ho |
| 647 | 1 | 2 | 0.425000  | -8.911350872  | -13.366367322 | -1.486115063 | 1 | 1 | 0 | # | ho |
| 648 | 1 | 2 | 0.425000  | -6.323000872  | -8.911817322  | -1.486115063 | 1 | 1 | 0 | # | ho |
| 649 | 1 | 3 | -1.050000 | -9.372085345  | -16.140698519 | -1.033422068 | 1 | 1 | 0 | # | ob |
| 650 | 1 | 3 | -1.050000 | -5.329882736  | -11.513103874 | -3.231846262 | 1 | 1 | 0 | # | ob |
| 651 | 1 | 3 | -1.050000 | -6.783155513  | -15.044550680 | -1.033631378 | 1 | 1 | 0 | # | ob |
| 652 | 1 | 3 | -1.050000 | -7.918560908  | -10.769489700 | -3.233079711 | 1 | 1 | 0 | # | ob |
| 653 | 1 | 3 | -1.050000 | -9.371505513  | -10.590000680 | -1.033631378 | 1 | 1 | 0 | # | ob |
| 654 | 1 | 3 | -1.050000 | -8.746944487  | -11.682749320 | 1.033631378  | 1 | 1 | 0 | # | ob |
| 655 | 1 | 3 | -1.050000 | -5.330210908  | -15.224039700 | -3.233079711 | 1 | 1 | 0 | # | ob |
| 656 | 1 | 3 | -1.050000 | -8.746364655  | -15.041151481 | 1.033422068  | 1 | 1 | 0 | # | ob |
| 657 | 1 | 3 | -1.050000 | -7.611867264  | -10.759646126 | 3.231846262  | 1 | 1 | 0 | # | ob |
| 658 | 1 | 3 | -1.050000 | -6.158014655  | -10.586601481 | 1.033422068  | 1 | 1 | 0 | # | ob |
| 659 | 1 | 3 | -1.050000 | -10.200217264 | -15.214196126 | 3.231846262  | 1 | 1 | 0 | # | ob |
| 660 | 1 | 3 | -1.050000 | -7.611539092  | -15.957810300 | 3.233079711  | 1 | 1 | 0 | # | ob |
| 661 | 1 | 4 | -0.950000 | -8.354142343  | -17.817259004 | 1.012582885  | 1 | 1 | 0 | # | oh |
| 662 | 1 | 3 | -1.050000 | -5.686318349  | -17.814223030 | 3.061482417  | 1 | 1 | 0 | # | ob |
| 663 | 1 | 4 | -0.950000 | -5.765792343  | -13.362709004 | 1.012582885  | 1 | 1 | 0 | # | oh |
| 664 | 1 | 3 | -1.050000 | -8.274668349  | -13.359673030 | 3.061482417  | 1 | 1 | 0 | # | ob |
| 665 | 1 | 4 | -0.950000 | -7.175957657  | -8.910040996  | -1.012582885 | 1 | 1 | 0 | # | oh |
| 666 | 1 | 3 | -1.050000 | -9.843781651  | -8.913076970  | -3.061482417 | 1 | 1 | 0 | # | ob |
| 667 | 1 | 4 | -0.950000 | -9.764307657  | -13.364590996 | -1.012582885 | 1 | 1 | 0 | # | oh |
| 668 | 1 | 3 | -1.050000 | -7.255431651  | -13.367626970 | -3.061482417 | 1 | 1 | 0 | # | ob |
| 669 | 1 | 3 | -1.050000 | -6.158594487  | -16.137299320 | 1.033631378  | 1 | 1 | 0 | # | ob |
| 670 | 1 | 3 | -1.050000 | -10.199889092 | -11.503260300 | 3.233079711  | 1 | 1 | 0 | # | ob |
| 671 | 1 | 3 | -1.050000 | -6.783735345  | -11.686148519 | -1.033422068 | 1 | 1 | 0 | # | ob |
| 672 | 1 | 3 | -1.050000 | -7.918232736  | -15.967653874 | -3.231846262 | 1 | 1 | 0 | # | ob |
| 673 | 1 | 5 | 2.100000  | -6.130402986  | -16.291080796 | 2.662777170  | 1 | 1 | 0 | # | st |
| 674 | 1 | 5 | 2.100000  | -6.811372226  | -11.844829218 | -2.661798097 | 1 | 1 | 0 | # | st |
| 675 | 1 | 5 | 2.100000  | -9.399697014  | -10.436219204 | -2.662777170 | 1 | 1 | 0 | # | st |
| 676 | 1 | 5 | 2.100000  | -6.811347014  | -14.890769204 | -2.662777170 | 1 | 1 | 0 | # | st |
| 677 | 1 | 5 | 2.100000  | -6.130377774  | -10.427920782 | 2.661798097  | 1 | 1 | 0 | # | st |
| 678 | 1 | 5 | 2.100000  | -8.718727774  | -14.882470782 | 2.661798097  | 1 | 1 | 0 | # | st |
| 679 | 1 | 5 | 2.100000  | -8.718752986  | -11.836530796 | 2.662777170  | 1 | 1 | 0 | # | st |
| 680 | 1 | 5 | 2.100000  | -9.399722226  | -16.299379218 | -2.661798097 | 1 | 1 | 0 | # | st |
| 681 | 1 | 1 | 1.575000  | -2.588144971  | -16.343538432 | 0.000270632  | 1 | 1 | 0 | # | ao |
| 682 | 1 | 1 | 1.575000  | -5.176494971  | -11.888988432 | 0.000270632  | 1 | 1 | 0 | # | ao |
| 683 | 1 | 1 | 1.575000  | -2.588555029  | -10.383761568 | -0.000270632 | 1 | 1 | 0 | # | ao |
| 684 | 1 | 1 | 1.575000  | -0.000205029  | -14.838311568 | -0.000270632 | 1 | 1 | 0 | # | ao |
| 685 | 1 | 2 | 0.425000  | -1.442049128  | -13.360932678 | 1.486115063  | 1 | 1 | 0 | # | ho |
| 686 | 1 | 2 | 0.425000  | -4.030399128  | -17.815482678 | 1.486115063  | 1 | 1 | 0 | # | ho |
| 687 | 1 | 2 | 0.425000  | -3.734650872  | -13.366367322 | -1.486115063 | 1 | 1 | 0 | # | ho |
| 688 | 1 | 2 | 0.425000  | -1.146300872  | -8.911817322  | -1.486115063 | 1 | 1 | 0 | # | ho |
| 689 | 1 | 3 | -1.050000 | -4.195385345  | -16.140698519 | -1.033422068 | 1 | 1 | 0 | # | ob |
| 690 | 1 | 3 | -1.050000 | -0.153182736  | -11.513103874 | -3.231846262 | 1 | 1 | 0 | # | ob |
| 691 | 1 | 3 | -1.050000 | -1.606455513  | -15.044550680 | -1.033631378 | 1 | 1 | 0 | # | ob |



|     |   |   |           |              |               |              |   |   |   |   |    |
|-----|---|---|-----------|--------------|---------------|--------------|---|---|---|---|----|
| 692 | 1 | 3 | -1.050000 | -2.741860908 | -10.769489700 | -3.233079711 | 1 | 1 | 0 | # | ob |
| 693 | 1 | 3 | -1.050000 | -4.194805513 | -10.590000680 | -1.033631378 | 1 | 1 | 0 | # | ob |
| 694 | 1 | 3 | -1.050000 | -3.570244487 | -11.682749320 | 1.033631378  | 1 | 1 | 0 | # | ob |
| 695 | 1 | 3 | -1.050000 | -0.153510908 | -15.224039700 | -3.233079711 | 1 | 1 | 0 | # | ob |
| 696 | 1 | 3 | -1.050000 | -3.569664655 | -15.041151481 | 1.033422068  | 1 | 1 | 0 | # | ob |
| 697 | 1 | 3 | -1.050000 | -2.435167264 | -10.759646126 | 3.231846262  | 1 | 1 | 0 | # | ob |
| 698 | 1 | 3 | -1.050000 | -0.981314655 | -10.586601481 | 1.033422068  | 1 | 1 | 0 | # | ob |
| 699 | 1 | 3 | -1.050000 | -5.023517264 | -15.214196126 | 3.231846262  | 1 | 1 | 0 | # | ob |
| 700 | 1 | 3 | -1.050000 | -2.434839092 | -15.957810300 | 3.233079711  | 1 | 1 | 0 | # | ob |
| 701 | 1 | 4 | -0.950000 | -3.177442343 | -17.817259004 | 1.012582885  | 1 | 1 | 0 | # | oh |
| 702 | 1 | 3 | -1.050000 | -0.509618349 | -17.814223030 | 3.061482417  | 1 | 1 | 0 | # | ob |
| 703 | 1 | 4 | -0.950000 | -0.589092343 | -13.362709004 | 1.012582885  | 1 | 1 | 0 | # | oh |
| 704 | 1 | 3 | -1.050000 | -3.097968349 | -13.359673030 | 3.061482417  | 1 | 1 | 0 | # | ob |
| 705 | 1 | 4 | -0.950000 | -1.999257657 | -8.910040996  | -1.012582885 | 1 | 1 | 0 | # | oh |
| 706 | 1 | 3 | -1.050000 | -4.667081651 | -8.913076970  | -3.061482417 | 1 | 1 | 0 | # | ob |
| 707 | 1 | 4 | -0.950000 | -4.587607657 | -13.364590996 | -1.012582885 | 1 | 1 | 0 | # | oh |
| 708 | 1 | 3 | -1.050000 | -2.078731651 | -13.367626970 | -3.061482417 | 1 | 1 | 0 | # | ob |
| 709 | 1 | 3 | -1.050000 | -0.981894487 | -16.137299320 | 1.033631378  | 1 | 1 | 0 | # | ob |
| 710 | 1 | 3 | -1.050000 | -5.023189092 | -11.503260300 | 3.233079711  | 1 | 1 | 0 | # | ob |
| 711 | 1 | 3 | -1.050000 | -1.607035345 | -11.686148519 | -1.033422068 | 1 | 1 | 0 | # | ob |
| 712 | 1 | 3 | -1.050000 | -2.741532736 | -15.967653874 | -3.231846262 | 1 | 1 | 0 | # | ob |
| 713 | 1 | 5 | 2.100000  | -0.953702986 | -16.291080796 | 2.662777170  | 1 | 1 | 0 | # | st |
| 714 | 1 | 5 | 2.100000  | -1.634672226 | -11.844829218 | -2.661798097 | 1 | 1 | 0 | # | st |
| 715 | 1 | 5 | 2.100000  | -4.222997014 | -10.436219204 | -2.662777170 | 1 | 1 | 0 | # | st |
| 716 | 1 | 5 | 2.100000  | -1.634647014 | -14.890769204 | -2.662777170 | 1 | 1 | 0 | # | st |
| 717 | 1 | 5 | 2.100000  | -0.953677774 | -10.427920782 | 2.661798097  | 1 | 1 | 0 | # | st |
| 718 | 1 | 5 | 2.100000  | -3.542027774 | -14.882470782 | 2.661798097  | 1 | 1 | 0 | # | st |
| 719 | 1 | 5 | 2.100000  | -3.542052986 | -11.836530796 | 2.662777170  | 1 | 1 | 0 | # | st |
| 720 | 1 | 5 | 2.100000  | -4.223022226 | -16.299379218 | -2.661798097 | 1 | 1 | 0 | # | st |
| 721 | 1 | 1 | 1.575000  | 2.588555029  | -7.434438432  | 0.000270632  | 0 | 1 | 0 | # | ao |
| 722 | 1 | 1 | 1.575000  | 0.000205029  | -2.979888432  | 0.000270632  | 0 | 1 | 0 | # | ao |
| 723 | 1 | 1 | 1.575000  | 2.588144971  | -1.474661568  | -0.000270632 | 0 | 1 | 0 | # | ao |
| 724 | 1 | 1 | 1.575000  | 5.176494971  | -5.929211568  | -0.000270632 | 0 | 1 | 0 | # | ao |
| 725 | 1 | 2 | 0.425000  | 3.734650872  | -4.451832678  | 1.486115063  | 0 | 1 | 0 | # | ho |
| 726 | 1 | 2 | 0.425000  | 1.146300872  | -8.906382678  | 1.486115063  | 0 | 1 | 0 | # | ho |
| 727 | 1 | 2 | 0.425000  | 1.442049128  | -4.457267322  | -1.486115063 | 0 | 1 | 0 | # | ho |
| 728 | 1 | 2 | 0.425000  | 4.030399128  | -0.002717322  | -1.486115063 | 0 | 1 | 0 | # | ho |
| 729 | 1 | 3 | -1.050000 | 0.981314655  | -7.231598519  | -1.033422068 | 0 | 1 | 0 | # | ob |
| 730 | 1 | 3 | -1.050000 | 5.023517264  | -2.604003874  | -3.231846262 | 0 | 1 | 0 | # | ob |
| 731 | 1 | 3 | -1.050000 | 3.570244487  | -6.135450680  | -1.033631378 | 0 | 1 | 0 | # | ob |
| 732 | 1 | 3 | -1.050000 | 2.434839092  | -1.860389700  | -3.233079711 | 0 | 1 | 0 | # | ob |
| 733 | 1 | 3 | -1.050000 | 0.981894487  | -1.680900680  | -1.033631378 | 0 | 1 | 0 | # | ob |
| 734 | 1 | 3 | -1.050000 | 1.606455513  | -2.773649320  | 1.033631378  | 0 | 1 | 0 | # | ob |
| 735 | 1 | 3 | -1.050000 | 5.023189092  | -6.314939700  | -3.233079711 | 0 | 1 | 0 | # | ob |
| 736 | 1 | 3 | -1.050000 | 1.607035345  | -6.132051481  | 1.033422068  | 0 | 1 | 0 | # | ob |
| 737 | 1 | 3 | -1.050000 | 2.741532736  | -1.850546126  | 3.231846262  | 0 | 1 | 0 | # | ob |
| 738 | 1 | 3 | -1.050000 | 4.195385345  | -1.677501481  | 1.033422068  | 0 | 1 | 0 | # | ob |
| 739 | 1 | 3 | -1.050000 | 0.153182736  | -6.305096126  | 3.231846262  | 0 | 1 | 0 | # | ob |
| 740 | 1 | 3 | -1.050000 | 2.741860908  | -7.048710300  | 3.233079711  | 0 | 1 | 0 | # | ob |
| 741 | 1 | 4 | -0.950000 | 1.999257657  | -8.908159004  | 1.012582885  | 0 | 1 | 0 | # | oh |
| 742 | 1 | 3 | -1.050000 | 4.667081651  | -8.905123030  | 3.061482417  | 0 | 1 | 0 | # | ob |
| 743 | 1 | 4 | -0.950000 | 4.587607657  | -4.453609004  | 1.012582885  | 0 | 1 | 0 | # | oh |
| 744 | 1 | 3 | -1.050000 | 2.078731651  | -4.450573030  | 3.061482417  | 0 | 1 | 0 | # | ob |
| 745 | 1 | 4 | -0.950000 | 3.177442343  | -0.000940996  | -1.012582885 | 0 | 1 | 0 | # | oh |
| 746 | 1 | 3 | -1.050000 | 0.509618349  | -0.003976970  | -3.061482417 | 0 | 1 | 0 | # | ob |
| 747 | 1 | 4 | -0.950000 | 0.589092343  | -4.455490996  | -1.012582885 | 0 | 1 | 0 | # | oh |
| 748 | 1 | 3 | -1.050000 | 3.097968349  | -4.458526970  | -3.061482417 | 0 | 1 | 0 | # | ob |
| 749 | 1 | 3 | -1.050000 | 4.194805513  | -7.228199320  | 1.033631378  | 0 | 1 | 0 | # | ob |
| 750 | 1 | 3 | -1.050000 | 0.153510908  | -2.594160300  | 3.233079711  | 0 | 1 | 0 | # | ob |
| 751 | 1 | 3 | -1.050000 | 3.569664655  | -2.777048519  | -1.033422068 | 0 | 1 | 0 | # | ob |
| 752 | 1 | 3 | -1.050000 | 2.435167264  | -7.058553874  | -3.231846262 | 0 | 1 | 0 | # | ob |
| 753 | 1 | 5 | 2.100000  | 4.222997014  | -7.381980796  | 2.662777170  | 0 | 1 | 0 | # | st |
| 754 | 1 | 5 | 2.100000  | 3.542027774  | -2.935729218  | -2.661798097 | 0 | 1 | 0 | # | st |
| 755 | 1 | 5 | 2.100000  | 0.953702986  | -1.527119204  | -2.662777170 | 0 | 1 | 0 | # | st |
| 756 | 1 | 5 | 2.100000  | 3.542052986  | -5.981669204  | -2.662777170 | 0 | 1 | 0 | # | st |
| 757 | 1 | 5 | 2.100000  | 4.223022226  | -1.518820782  | 2.661798097  | 0 | 1 | 0 | # | st |
| 758 | 1 | 5 | 2.100000  | 1.634672226  | -5.973370782  | 2.661798097  | 0 | 1 | 0 | # | st |
| 759 | 1 | 5 | 2.100000  | 1.634647014  | -2.927430796  | 2.662777170  | 0 | 1 | 0 | # | st |
| 760 | 1 | 5 | 2.100000  | 0.953677774  | -7.390279218  | -2.661798097 | 0 | 1 | 0 | # | st |
| 761 | 1 | 1 | 1.575000  | 7.765255029  | -7.434438432  | 0.000270632  | 0 | 1 | 0 | # | ao |
| 762 | 1 | 1 | 1.575000  | 5.176905029  | -2.979888432  | 0.000270632  | 0 | 1 | 0 | # | ao |
| 763 | 1 | 1 | 1.575000  | 7.764844971  | -1.474661568  | -0.000270632 | 0 | 1 | 0 | # | ao |
| 764 | 1 | 1 | 1.575000  | 10.353194971 | -5.929211568  | -0.000270632 | 0 | 1 | 0 | # | ao |
| 765 | 1 | 2 | 0.425000  | 8.911350872  | -4.451832678  | 1.486115063  | 0 | 1 | 0 | # | ho |
| 766 | 1 | 2 | 0.425000  | 6.323000872  | -8.906382678  | 1.486115063  | 0 | 1 | 0 | # | ho |
| 767 | 1 | 2 | 0.425000  | 6.618749128  | -4.457267322  | -1.486115063 | 0 | 1 | 0 | # | ho |
| 768 | 1 | 2 | 0.425000  | 9.207099128  | -0.002717322  | -1.486115063 | 0 | 1 | 0 | # | ho |
| 769 | 1 | 3 | -1.050000 | 6.158014655  | -7.231598519  | -1.033422068 | 0 | 1 | 0 | # | ob |
| 770 | 1 | 3 | -1.050000 | 10.200217264 | -2.604003874  | -3.231846262 | 0 | 1 | 0 | # | ob |
| 771 | 1 | 3 | -1.050000 | 8.746944487  | -6.135450680  | -1.033631378 | 0 | 1 | 0 | # | ob |
| 772 | 1 | 3 | -1.050000 | 7.611539092  | -1.860389700  | -3.233079711 | 0 | 1 | 0 | # | ob |
| 773 | 1 | 3 | -1.050000 | 6.158594487  | -1.680900680  | -1.033631378 | 0 | 1 | 0 | # | ob |
| 774 | 1 | 3 | -1.050000 | 6.783155513  | -2.773649320  | 1.033631378  | 0 | 1 | 0 | # | ob |
| 775 | 1 | 3 | -1.050000 | 10.199889092 | -6.314939700  | -3.233079711 | 0 | 1 | 0 | # | ob |
| 776 | 1 | 3 | -1.050000 | 6.783735345  | -6.132051481  | 1.033422068  | 0 | 1 | 0 | # | ob |
| 777 | 1 | 3 | -1.050000 | 7.918232736  | -1.850546126  | 3.231846262  | 0 | 1 | 0 | # | ob |
| 778 | 1 | 3 | -1.050000 | 9.372085345  | -1.677501481  | 1.033422068  | 0 | 1 | 0 | # | ob |
| 779 | 1 | 3 | -1.050000 | 5.329882736  | -6.305096126  | 3.231846262  | 0 | 1 | 0 | # | ob |
| 780 | 1 | 3 | -1.050000 | 7.918560908  | -7.048710300  | 3.233079711  | 0 | 1 | 0 | # | ob |
| 781 | 1 | 4 | -0.950000 | 7.175957657  | -8.908159004  | 1.012582885  | 0 | 1 | 0 | # | oh |
| 782 | 1 | 3 | -1.050000 | 9.843781651  | -8.905123030  | 3.061482417  | 0 | 1 | 0 | # | ob |
| 783 | 1 | 4 | -0.950000 | 9.764307657  | -4.453609004  | 1.012582885  | 0 | 1 | 0 | # | oh |
| 784 | 1 | 3 | -1.050000 | 7.255431651  | -4.450573030  | 3.061482417  | 0 | 1 | 0 | # | ob |

785 1 4 -0.950000 8.354142343 -0.000940996 -1.012582885 0 1 0 # oh  
786 1 3 -1.050000 5.686318349 -0.003976970 -3.061482417 0 1 0 # ob  
787 1 4 -0.950000 5.765792343 -4.455490996 -1.012582885 0 1 0 # oh  
788 1 3 -1.050000 8.274668349 -4.458526970 -3.061482417 0 1 0 # ob  
789 1 3 -1.050000 9.371505513 -7.228199320 1.033631378 0 1 0 # ob  
790 1 3 -1.050000 5.330210908 -2.594160300 3.233079711 0 1 0 # ob  
791 1 3 -1.050000 8.746364655 -2.777048519 -1.033422068 0 1 0 # ob  
792 1 3 -1.050000 7.611867264 -7.058553874 -3.231846262 0 1 0 # ob  
793 1 5 2.100000 9.399697014 -7.381980796 2.662777170 0 1 0 # st  
794 1 5 2.100000 8.718727774 -2.935729218 -2.661798097 0 1 0 # st  
795 1 5 2.100000 6.130402986 -1.527119204 -2.662777170 0 1 0 # st  
796 1 5 2.100000 8.718752986 -5.981669204 -2.662777170 0 1 0 # st  
797 1 5 2.100000 9.399722226 -1.518820782 2.661798097 0 1 0 # st  
798 1 5 2.100000 6.811372226 -5.973370782 2.661798097 0 1 0 # st  
799 1 5 2.100000 6.811347014 -2.927430796 2.662777170 0 1 0 # st  
800 1 5 2.100000 6.130377774 -7.390279218 -2.661798097 0 1 0 # st  
801 1 1 1.575000 12.941955029 -7.434438432 0.000270632 0 1 0 # ao  
802 1 1 1.575000 10.353605029 -2.979888432 0.000270632 0 1 0 # ao  
803 1 1 1.575000 12.941544971 -1.474661568 -0.000270632 0 1 0 # ao  
804 1 1 1.575000 15.529894971 -5.929211568 -0.000270632 0 1 0 # ao  
805 1 2 0.425000 14.088050872 -4.451832678 1.486115063 0 1 0 # ho  
806 1 2 0.425000 11.499700872 -8.906382678 1.486115063 0 1 0 # ho  
807 1 2 0.425000 11.795449128 -4.457267322 -1.486115063 0 1 0 # ho  
808 1 2 0.425000 14.383799128 -0.002717322 -1.486115063 0 1 0 # ho  
809 1 3 -1.050000 11.334714655 -7.231598519 -1.033422068 0 1 0 # ob  
810 1 3 -1.050000 15.376917264 -2.604003874 -3.231846262 0 1 0 # ob  
811 1 3 -1.050000 13.923644487 -6.135450680 -1.033631378 0 1 0 # ob  
812 1 3 -1.050000 12.788239092 -1.860389700 -3.233079711 0 1 0 # ob  
813 1 3 -1.050000 11.335294487 -1.680900680 -1.033631378 0 1 0 # ob  
814 1 3 -1.050000 11.959855513 -2.773649320 1.033631378 0 1 0 # ob  
815 1 3 -1.050000 15.376589092 -6.314939700 -3.233079711 0 1 0 # ob  
816 1 3 -1.050000 11.960435345 -6.132051481 1.033422068 0 1 0 # ob  
817 1 3 -1.050000 13.094932736 -1.850546126 3.231846262 0 1 0 # ob  
818 1 3 -1.050000 14.548785345 -1.677501481 1.033422068 0 1 0 # ob  
819 1 3 -1.050000 10.506582736 -6.305096126 3.231846262 0 1 0 # ob  
820 1 3 -1.050000 13.095260908 -7.048710300 3.233079711 0 1 0 # ob  
821 1 4 -0.950000 12.352657657 -8.908159004 1.012582885 0 1 0 # oh  
822 1 3 -1.050000 15.020481651 -8.905123030 3.061482417 0 1 0 # ob  
823 1 4 -0.950000 14.941007657 -4.453609004 1.012582885 0 1 0 # oh  
824 1 3 -1.050000 12.432131651 -4.450573030 3.061482417 0 1 0 # ob  
825 1 4 -0.950000 13.530842343 -0.000940996 -1.012582885 0 1 0 # oh  
826 1 3 -1.050000 10.863018349 -0.003976970 -3.061482417 0 1 0 # ob  
827 1 4 -0.950000 10.942492343 -4.455490996 -1.012582885 0 1 0 # oh  
828 1 3 -1.050000 13.451368349 -4.458526970 -3.061482417 0 1 0 # ob  
829 1 3 -1.050000 14.548205513 -7.228199320 1.033631378 0 1 0 # ob  
830 1 3 -1.050000 10.506910908 -2.594160300 3.233079711 0 1 0 # ob  
831 1 3 -1.050000 13.923064655 -2.777048519 -1.033422068 0 1 0 # ob  
832 1 3 -1.050000 12.788567264 -7.058553874 -3.231846262 0 1 0 # ob  
833 1 5 2.100000 14.576397014 -7.381980796 2.662777170 0 1 0 # st  
834 1 5 2.100000 13.895427774 -2.935729218 -2.661798097 0 1 0 # st  
835 1 5 2.100000 11.307102986 -1.527119204 -2.662777170 0 1 0 # st  
836 1 5 2.100000 13.895452986 -5.981669204 -2.662777170 0 1 0 # st  
837 1 5 2.100000 14.576422226 -1.518820782 2.661798097 0 1 0 # st  
838 1 5 2.100000 11.988072226 -5.973370782 2.661798097 0 1 0 # st  
839 1 5 2.100000 11.988047014 -2.927430796 2.662777170 0 1 0 # st  
840 1 5 2.100000 11.307077774 -7.390279218 -2.661798097 0 1 0 # st  
841 1 1 1.575000 -12.941544971 -7.434438432 0.000270632 1 1 0 # ao  
842 1 1 1.575000 -15.529894971 -2.979888432 0.000270632 1 1 0 # ao  
843 1 1 1.575000 -12.941955029 -1.474661568 -0.000270632 1 1 0 # ao  
844 1 1 1.575000 -10.353605029 -5.929211568 -0.000270632 1 1 0 # ao  
845 1 2 0.425000 -11.795449128 -4.451832678 1.486115063 1 1 0 # ho  
846 1 2 0.425000 -14.383799128 -8.906382678 1.486115063 1 1 0 # ho  
847 1 2 0.425000 -14.088050872 -4.457267322 -1.486115063 1 1 0 # ho  
848 1 2 0.425000 -11.499700872 -0.002717322 -1.486115063 1 1 0 # ho  
849 1 3 -1.050000 -14.548785345 -7.231598519 -1.033422068 1 1 0 # ob  
850 1 3 -1.050000 -10.506582736 -2.604003874 -3.231846262 1 1 0 # ob  
851 1 3 -1.050000 -11.959855513 -6.135450680 -1.033631378 1 1 0 # ob  
852 1 3 -1.050000 -13.095260908 -1.860389700 -3.233079711 1 1 0 # ob  
853 1 3 -1.050000 -14.548205513 -1.680900680 -1.033631378 1 1 0 # ob  
854 1 3 -1.050000 -13.923644487 -2.773649320 1.033631378 1 1 0 # ob  
855 1 3 -1.050000 -10.506910908 -6.314939700 -3.233079711 1 1 0 # ob  
856 1 3 -1.050000 -13.923064655 -6.132051481 1.033422068 1 1 0 # ob  
857 1 3 -1.050000 -12.788567264 -1.850546126 3.231846262 1 1 0 # ob  
858 1 3 -1.050000 -11.334714655 -1.677501481 1.033422068 1 1 0 # ob  
859 1 3 -1.050000 -15.376917264 -6.305096126 3.231846262 1 1 0 # ob  
860 1 3 -1.050000 -12.788239092 -7.048710300 3.233079711 1 1 0 # ob  
861 1 4 -0.950000 -13.530842343 -8.908159004 1.012582885 1 1 0 # oh  
862 1 3 -1.050000 -10.863018349 -8.905123030 3.061482417 1 1 0 # ob  
863 1 4 -0.950000 -10.942492343 -4.453609004 1.012582885 1 1 0 # oh  
864 1 3 -1.050000 -13.451368349 -4.450573030 3.061482417 1 1 0 # ob  
865 1 4 -0.950000 -12.352657657 -0.000940996 -1.012582885 1 1 0 # oh  
866 1 3 -1.050000 -15.020481651 -0.003976970 -3.061482417 1 1 0 # ob  
867 1 4 -0.950000 -14.941007657 -4.455490996 -1.012582885 1 1 0 # oh  
868 1 3 -1.050000 -12.432131651 -4.458526970 -3.061482417 1 1 0 # ob  
869 1 3 -1.050000 -11.335294487 -7.228199320 1.033631378 1 1 0 # ob  
870 1 3 -1.050000 -15.376589092 -2.594160300 3.233079711 1 1 0 # ob  
871 1 3 -1.050000 -11.960435345 -2.777048519 -1.033422068 1 1 0 # ob  
872 1 3 -1.050000 -13.094932736 -7.058553874 -3.231846262 1 1 0 # ob  
873 1 5 2.100000 -11.307102986 -7.381980796 2.662777170 1 1 0 # st  
874 1 5 2.100000 -11.988072226 -2.935729218 -2.661798097 1 1 0 # st  
875 1 5 2.100000 -14.576397014 -1.527119204 -2.662777170 1 1 0 # st  
876 1 5 2.100000 -11.988047014 -5.981669204 -2.662777170 1 1 0 # st  
877 1 5 2.100000 -11.307077774 -1.518820782 2.661798097 1 1 0 # st

|     |   |   |           |               |              |              |   |   |   |   |    |
|-----|---|---|-----------|---------------|--------------|--------------|---|---|---|---|----|
| 878 | 1 | 5 | 2.100000  | -13.895427774 | -5.973370782 | 2.661798097  | 1 | 1 | 0 | # | st |
| 879 | 1 | 5 | 2.100000  | -13.895452986 | -2.927430796 | 2.662777170  | 1 | 1 | 0 | # | st |
| 880 | 1 | 5 | 2.100000  | -14.576422226 | -7.390279218 | -2.661798097 | 1 | 1 | 0 | # | st |
| 881 | 1 | 1 | 1.575000  | -7.764844971  | -7.434438432 | 0.000270632  | 1 | 1 | 0 | # | ao |
| 882 | 1 | 1 | 1.575000  | -10.353194971 | -2.979888432 | 0.000270632  | 1 | 1 | 0 | # | ao |
| 883 | 1 | 1 | 1.575000  | -7.765255029  | -1.474661568 | -0.000270632 | 1 | 1 | 0 | # | ao |
| 884 | 1 | 1 | 1.575000  | -5.176905029  | -5.929211568 | -0.000270632 | 1 | 1 | 0 | # | ao |
| 885 | 1 | 2 | 0.425000  | -6.618749128  | -4.451832678 | 1.486115063  | 1 | 1 | 0 | # | ho |
| 886 | 1 | 2 | 0.425000  | -9.207099128  | -8.906382678 | 1.486115063  | 1 | 1 | 0 | # | ho |
| 887 | 1 | 2 | 0.425000  | -8.911350872  | -4.457267322 | -1.486115063 | 1 | 1 | 0 | # | ho |
| 888 | 1 | 2 | 0.425000  | -6.323000872  | -0.002717322 | -1.486115063 | 1 | 1 | 0 | # | ho |
| 889 | 1 | 3 | -1.050000 | -9.372085345  | -7.231598519 | -1.033422068 | 1 | 1 | 0 | # | ob |
| 890 | 1 | 3 | -1.050000 | -5.329882736  | -2.604003874 | -3.231846262 | 1 | 1 | 0 | # | ob |
| 891 | 1 | 3 | -1.050000 | -6.783155513  | -6.135450680 | -1.033631378 | 1 | 1 | 0 | # | ob |
| 892 | 1 | 3 | -1.050000 | -7.918560908  | -1.860389700 | -3.233079711 | 1 | 1 | 0 | # | ob |
| 893 | 1 | 3 | -1.050000 | -9.371505513  | -1.680900680 | -1.033631378 | 1 | 1 | 0 | # | ob |
| 894 | 1 | 3 | -1.050000 | -8.746944487  | -2.773649320 | 1.033631378  | 1 | 1 | 0 | # | ob |
| 895 | 1 | 3 | -1.050000 | -5.330210908  | -6.314939700 | -3.233079711 | 1 | 1 | 0 | # | ob |
| 896 | 1 | 3 | -1.050000 | -8.746364655  | -6.132051481 | 1.033422068  | 1 | 1 | 0 | # | ob |
| 897 | 1 | 3 | -1.050000 | -7.611867264  | -1.850546126 | 3.231846262  | 1 | 1 | 0 | # | ob |
| 898 | 1 | 3 | -1.050000 | -6.158014655  | -1.677501481 | 1.033422068  | 1 | 1 | 0 | # | ob |
| 899 | 1 | 3 | -1.050000 | -10.200217264 | -6.305096126 | 3.231846262  | 1 | 1 | 0 | # | ob |
| 900 | 1 | 3 | -1.050000 | -7.611539092  | -7.048710300 | 3.233079711  | 1 | 1 | 0 | # | ob |
| 901 | 1 | 4 | -0.950000 | -8.354142343  | -8.908159004 | 1.012582885  | 1 | 1 | 0 | # | oh |
| 902 | 1 | 3 | -1.050000 | -5.686318349  | -8.905123030 | 3.061482417  | 1 | 1 | 0 | # | ob |
| 903 | 1 | 4 | -0.950000 | -5.765792343  | -4.453609004 | 1.012582885  | 1 | 1 | 0 | # | oh |
| 904 | 1 | 3 | -1.050000 | -8.274668349  | -4.450573030 | 3.061482417  | 1 | 1 | 0 | # | ob |
| 905 | 1 | 4 | -0.950000 | -7.175957657  | -0.000940996 | -1.012582885 | 1 | 1 | 0 | # | oh |
| 906 | 1 | 3 | -1.050000 | -9.843781651  | -0.003976970 | -3.061482417 | 1 | 1 | 0 | # | ob |
| 907 | 1 | 4 | -0.950000 | -9.764307657  | -4.455490996 | -1.012582885 | 1 | 1 | 0 | # | oh |
| 908 | 1 | 3 | -1.050000 | -7.255431651  | -4.458526970 | -3.061482417 | 1 | 1 | 0 | # | ob |
| 909 | 1 | 3 | -1.050000 | -6.158594487  | -7.228199320 | 1.033631378  | 1 | 1 | 0 | # | ob |
| 910 | 1 | 3 | -1.050000 | -10.199889092 | -2.594160300 | 3.233079711  | 1 | 1 | 0 | # | ob |
| 911 | 1 | 3 | -1.050000 | -6.783735345  | -2.777048519 | -1.033422068 | 1 | 1 | 0 | # | ob |
| 912 | 1 | 3 | -1.050000 | -7.918232736  | -7.058553874 | -3.231846262 | 1 | 1 | 0 | # | ob |
| 913 | 1 | 5 | 2.100000  | -6.130402986  | -7.381980796 | 2.662777170  | 1 | 1 | 0 | # | st |
| 914 | 1 | 5 | 2.100000  | -6.811372226  | -2.935729218 | -2.661798097 | 1 | 1 | 0 | # | st |
| 915 | 1 | 5 | 2.100000  | -9.399697014  | -1.527119204 | -2.662777170 | 1 | 1 | 0 | # | st |
| 916 | 1 | 5 | 2.100000  | -6.811347014  | -5.981669204 | -2.662777170 | 1 | 1 | 0 | # | st |
| 917 | 1 | 5 | 2.100000  | -6.130377774  | -1.518820782 | 2.661798097  | 1 | 1 | 0 | # | st |
| 918 | 1 | 5 | 2.100000  | -8.718727774  | -5.973370782 | 2.661798097  | 1 | 1 | 0 | # | st |
| 919 | 1 | 5 | 2.100000  | -8.718752986  | -2.927430796 | 2.662777170  | 1 | 1 | 0 | # | st |
| 920 | 1 | 5 | 2.100000  | -9.399722226  | -7.390279218 | -2.661798097 | 1 | 1 | 0 | # | st |
| 921 | 1 | 1 | 1.575000  | -2.588144971  | -7.434438432 | 0.000270632  | 1 | 1 | 0 | # | ao |
| 922 | 1 | 1 | 1.575000  | -5.176494971  | -2.979888432 | 0.000270632  | 1 | 1 | 0 | # | ao |
| 923 | 1 | 1 | 1.575000  | -2.588555029  | -1.474661568 | -0.000270632 | 1 | 1 | 0 | # | ao |
| 924 | 1 | 1 | 1.575000  | -0.000205029  | -5.929211568 | -0.000270632 | 1 | 1 | 0 | # | ao |
| 925 | 1 | 2 | 0.425000  | -1.442049128  | -4.451832678 | 1.486115063  | 1 | 1 | 0 | # | ho |
| 926 | 1 | 2 | 0.425000  | -4.030399128  | -8.906382678 | 1.486115063  | 1 | 1 | 0 | # | ho |
| 927 | 1 | 2 | 0.425000  | -3.734650872  | -4.457267322 | -1.486115063 | 1 | 1 | 0 | # | ho |
| 928 | 1 | 2 | 0.425000  | -1.146300872  | -0.002717322 | -1.486115063 | 1 | 1 | 0 | # | ho |
| 929 | 1 | 3 | -1.050000 | -4.195385345  | -7.231598519 | -1.033422068 | 1 | 1 | 0 | # | ob |
| 930 | 1 | 3 | -1.050000 | -0.153182736  | -2.604003874 | -3.231846262 | 1 | 1 | 0 | # | ob |
| 931 | 1 | 3 | -1.050000 | -1.606455513  | -6.135450680 | -1.033631378 | 1 | 1 | 0 | # | ob |
| 932 | 1 | 3 | -1.050000 | -2.741860908  | -1.860389700 | -3.233079711 | 1 | 1 | 0 | # | ob |
| 933 | 1 | 3 | -1.050000 | -4.194805513  | -1.680900680 | -1.033631378 | 1 | 1 | 0 | # | ob |
| 934 | 1 | 3 | -1.050000 | -3.570244487  | -2.773649320 | 1.033631378  | 1 | 1 | 0 | # | ob |
| 935 | 1 | 3 | -1.050000 | -0.153510908  | -6.314939700 | -3.233079711 | 1 | 1 | 0 | # | ob |
| 936 | 1 | 3 | -1.050000 | -3.569664655  | -6.132051481 | 1.033422068  | 1 | 1 | 0 | # | ob |
| 937 | 1 | 3 | -1.050000 | -2.435167264  | -1.850546126 | 3.231846262  | 1 | 1 | 0 | # | ob |
| 938 | 1 | 3 | -1.050000 | -0.981314655  | -1.677501481 | 1.033422068  | 1 | 1 | 0 | # | ob |
| 939 | 1 | 3 | -1.050000 | -5.023517264  | -6.305096126 | 3.231846262  | 1 | 1 | 0 | # | ob |
| 940 | 1 | 3 | -1.050000 | -2.434839092  | -7.048710300 | 3.233079711  | 1 | 1 | 0 | # | ob |
| 941 | 1 | 4 | -0.950000 | -3.177442343  | -8.908159004 | 1.012582885  | 1 | 1 | 0 | # | oh |
| 942 | 1 | 3 | -1.050000 | -0.509618349  | -8.905123030 | 3.061482417  | 1 | 1 | 0 | # | ob |
| 943 | 1 | 4 | -0.950000 | -0.589092343  | -4.453609004 | 1.012582885  | 1 | 1 | 0 | # | oh |
| 944 | 1 | 3 | -1.050000 | -3.097968349  | -4.450573030 | 3.061482417  | 1 | 1 | 0 | # | ob |
| 945 | 1 | 4 | -0.950000 | -1.999257657  | -0.000940996 | -1.012582885 | 1 | 1 | 0 | # | oh |
| 946 | 1 | 3 | -1.050000 | -4.667081651  | -0.003976970 | -3.061482417 | 1 | 1 | 0 | # | ob |
| 947 | 1 | 4 | -0.950000 | -4.587607657  | -4.455490996 | -1.012582885 | 1 | 1 | 0 | # | oh |
| 948 | 1 | 3 | -1.050000 | -2.078731651  | -4.458526970 | -3.061482417 | 1 | 1 | 0 | # | ob |
| 949 | 1 | 3 | -1.050000 | -0.981894487  | -7.228199320 | 1.033631378  | 1 | 1 | 0 | # | ob |
| 950 | 1 | 3 | -1.050000 | -5.023189092  | -2.594160300 | 3.233079711  | 1 | 1 | 0 | # | ob |
| 951 | 1 | 3 | -1.050000 | -1.607035345  | -2.777048519 | -1.033422068 | 1 | 1 | 0 | # | ob |
| 952 | 1 | 3 | -1.050000 | -2.741532736  | -7.058553874 | -3.231846262 | 1 | 1 | 0 | # | ob |
| 953 | 1 | 5 | 2.100000  | -0.953702986  | -7.381980796 | 2.662777170  | 1 | 1 | 0 | # | st |
| 954 | 1 | 5 | 2.100000  | -1.634672226  | -2.935729218 | -2.661798097 | 1 | 1 | 0 | # | st |
| 955 | 1 | 5 | 2.100000  | -4.222997014  | -1.527119204 | -2.662777170 | 1 | 1 | 0 | # | st |
| 956 | 1 | 5 | 2.100000  | -1.634647014  | -5.981669204 | -2.662777170 | 1 | 1 | 0 | # | st |
| 957 | 1 | 5 | 2.100000  | -0.953677774  | -1.518820782 | 2.661798097  | 1 | 1 | 0 | # | st |
| 958 | 1 | 5 | 2.100000  | -3.542027774  | -5.973370782 | 2.661798097  | 1 | 1 | 0 | # | st |
| 959 | 1 | 5 | 2.100000  | -3.542052986  | -2.927430796 | 2.662777170  | 1 | 1 | 0 | # | st |
| 960 | 1 | 5 | 2.100000  | -4.223022226  | -7.390279218 | -2.661798097 | 1 | 1 | 0 | # | st |
| 961 | 1 | 1 | 1.575000  | 2.588555029   | 1.474661568  | 9.332770632  | 0 | 0 | 0 | # | ao |
| 962 | 1 | 1 | 1.575000  | 0.000205029   | 5.929211568  | 9.332770632  | 0 | 0 | 0 | # | ao |
| 963 | 1 | 1 | 1.575000  | 2.588144971   | 7.434438432  | 9.332229368  | 0 | 0 | 0 | # | ao |
| 964 | 1 | 1 | 1.575000  | 5.176494971   | 2.979888432  | 9.332229368  | 0 | 0 | 0 | # | ao |
| 965 | 1 | 2 | 0.425000  | 3.734650872   | 4.457267322  | 10.818615063 | 0 | 0 | 0 | # | ho |
| 966 | 1 | 2 | 0.425000  | 1.146300872   | 0.002717322  | 10.818615063 | 0 | 0 | 0 | # | ho |
| 967 | 1 | 2 | 0.425000  | 1.442049128   | 4.451832678  | 7.846384937  | 0 | 0 | 0 | # | ho |
| 968 | 1 | 2 | 0.425000  | 4.030399128   | 8.906382678  | 7.846384937  | 0 | 0 | 0 | # | ho |
| 969 | 1 | 3 | -1.050000 | 0.981314655   | 1.677501481  | 8.299077932  | 0 | 0 | 0 | # | ob |
| 970 | 1 | 3 | -1.050000 | 5.023517264   | 6.305096126  | 6.100653738  | 0 | 0 | 0 | # | ob |

|      |   |   |           |              |             |              |   |   |   |   |    |
|------|---|---|-----------|--------------|-------------|--------------|---|---|---|---|----|
| 971  | 1 | 3 | -1.050000 | 3.570244487  | 2.773649320 | 8.298868622  | 0 | 0 | 0 | # | ob |
| 972  | 1 | 3 | -1.050000 | 2.434839092  | 7.048710300 | 6.099420289  | 0 | 0 | 0 | # | ob |
| 973  | 1 | 3 | -1.050000 | 0.981894487  | 7.228199320 | 8.298868622  | 0 | 0 | 0 | # | ob |
| 974  | 1 | 3 | -1.050000 | 1.606455513  | 6.135450680 | 10.366131378 | 0 | 0 | 0 | # | ob |
| 975  | 1 | 3 | -1.050000 | 5.023189092  | 2.594160300 | 6.099420289  | 0 | 0 | 0 | # | ob |
| 976  | 1 | 3 | -1.050000 | 1.607035345  | 2.777048519 | 10.365922068 | 0 | 0 | 0 | # | ob |
| 977  | 1 | 3 | -1.050000 | 2.741532736  | 7.058553874 | 12.564346262 | 0 | 0 | 0 | # | ob |
| 978  | 1 | 3 | -1.050000 | 4.195385345  | 7.231598519 | 10.365922068 | 0 | 0 | 0 | # | ob |
| 979  | 1 | 3 | -1.050000 | 0.153182736  | 2.604003874 | 12.564346262 | 0 | 0 | 0 | # | ob |
| 980  | 1 | 3 | -1.050000 | 2.741860908  | 1.860389700 | 12.565579711 | 0 | 0 | 0 | # | ob |
| 981  | 1 | 4 | -0.950000 | 1.999257657  | 0.000940996 | 10.345082885 | 0 | 0 | 0 | # | oh |
| 982  | 1 | 3 | -1.050000 | 4.667081651  | 0.003976970 | 12.393982417 | 0 | 0 | 0 | # | ob |
| 983  | 1 | 4 | -0.950000 | 4.587607657  | 4.455490996 | 10.345082885 | 0 | 0 | 0 | # | oh |
| 984  | 1 | 3 | -1.050000 | 2.078731651  | 4.458526970 | 12.393982417 | 0 | 0 | 0 | # | ob |
| 985  | 1 | 4 | -0.950000 | 3.177442343  | 8.908159004 | 8.319917115  | 0 | 0 | 0 | # | oh |
| 986  | 1 | 3 | -1.050000 | 0.509618349  | 8.905123030 | 6.271017583  | 0 | 0 | 0 | # | ob |
| 987  | 1 | 4 | -0.950000 | 0.589092343  | 4.453609004 | 8.319917115  | 0 | 0 | 0 | # | oh |
| 988  | 1 | 3 | -1.050000 | 3.097968349  | 4.450573030 | 6.271017583  | 0 | 0 | 0 | # | ob |
| 989  | 1 | 3 | -1.050000 | 4.194805513  | 1.680900680 | 10.366131378 | 0 | 0 | 0 | # | ob |
| 990  | 1 | 3 | -1.050000 | 0.153510908  | 6.314939700 | 12.565579711 | 0 | 0 | 0 | # | ob |
| 991  | 1 | 3 | -1.050000 | 3.569664655  | 6.132051481 | 8.299077932  | 0 | 0 | 0 | # | ob |
| 992  | 1 | 3 | -1.050000 | 2.435167264  | 1.850546126 | 6.100653738  | 0 | 0 | 0 | # | ob |
| 993  | 1 | 5 | 2.100000  | 4.222997014  | 1.527119204 | 11.995277170 | 0 | 0 | 0 | # | st |
| 994  | 1 | 5 | 2.100000  | 3.542027774  | 5.973370782 | 6.670701903  | 0 | 0 | 0 | # | st |
| 995  | 1 | 5 | 2.100000  | 0.953702986  | 7.381980796 | 6.669722830  | 0 | 0 | 0 | # | st |
| 996  | 1 | 5 | 2.100000  | 3.542052986  | 2.927430796 | 6.669722830  | 0 | 0 | 0 | # | st |
| 997  | 1 | 5 | 2.100000  | 4.223022226  | 7.390279218 | 11.994298097 | 0 | 0 | 0 | # | st |
| 998  | 1 | 5 | 2.100000  | 1.634672226  | 2.935729218 | 11.994298097 | 0 | 0 | 0 | # | st |
| 999  | 1 | 5 | 2.100000  | 1.634647014  | 5.981669204 | 11.995277170 | 0 | 0 | 0 | # | st |
| 1000 | 1 | 5 | 2.100000  | 0.953677774  | 1.518820782 | 6.670701903  | 0 | 0 | 0 | # | st |
| 1001 | 1 | 1 | 1.575000  | 7.765255029  | 1.474661568 | 9.332770632  | 0 | 0 | 0 | # | ao |
| 1002 | 1 | 1 | 1.575000  | 5.176905029  | 5.929211568 | 9.332770632  | 0 | 0 | 0 | # | ao |
| 1003 | 1 | 1 | 1.575000  | 7.764844971  | 7.434438432 | 9.332229368  | 0 | 0 | 0 | # | ao |
| 1004 | 1 | 1 | 1.575000  | 10.353194971 | 2.979888432 | 9.332229368  | 0 | 0 | 0 | # | ao |
| 1005 | 1 | 2 | 0.425000  | 8.911350872  | 4.457267322 | 10.818615063 | 0 | 0 | 0 | # | ho |
| 1006 | 1 | 2 | 0.425000  | 6.323000872  | 0.002717322 | 10.818615063 | 0 | 0 | 0 | # | ho |
| 1007 | 1 | 2 | 0.425000  | 6.618749128  | 4.451832678 | 7.846384937  | 0 | 0 | 0 | # | ho |
| 1008 | 1 | 2 | 0.425000  | 9.207099128  | 8.906382678 | 7.846384937  | 0 | 0 | 0 | # | ho |
| 1009 | 1 | 3 | -1.050000 | 6.158014655  | 1.677501481 | 8.299077932  | 0 | 0 | 0 | # | ob |
| 1010 | 1 | 3 | -1.050000 | 10.200217264 | 6.305096126 | 6.100653738  | 0 | 0 | 0 | # | ob |
| 1011 | 1 | 3 | -1.050000 | 8.746944487  | 2.773649320 | 8.298868622  | 0 | 0 | 0 | # | ob |
| 1012 | 1 | 3 | -1.050000 | 7.611539092  | 7.048710300 | 6.099420289  | 0 | 0 | 0 | # | ob |
| 1013 | 1 | 3 | -1.050000 | 6.158594487  | 7.228199320 | 8.298868622  | 0 | 0 | 0 | # | ob |
| 1014 | 1 | 3 | -1.050000 | 6.783155513  | 6.135450680 | 10.366131378 | 0 | 0 | 0 | # | ob |
| 1015 | 1 | 3 | -1.050000 | 10.199889092 | 2.594160300 | 6.099420289  | 0 | 0 | 0 | # | ob |
| 1016 | 1 | 3 | -1.050000 | 6.783735345  | 2.777048519 | 10.365922068 | 0 | 0 | 0 | # | ob |
| 1017 | 1 | 3 | -1.050000 | 7.918232736  | 7.058553874 | 12.564346262 | 0 | 0 | 0 | # | ob |
| 1018 | 1 | 3 | -1.050000 | 9.372085345  | 7.231598519 | 10.365922068 | 0 | 0 | 0 | # | ob |
| 1019 | 1 | 3 | -1.050000 | 5.329882736  | 2.604003874 | 12.564346262 | 0 | 0 | 0 | # | ob |
| 1020 | 1 | 3 | -1.050000 | 7.918560908  | 1.860389700 | 12.565579711 | 0 | 0 | 0 | # | ob |
| 1021 | 1 | 4 | -0.950000 | 7.175957657  | 0.000940996 | 10.345082885 | 0 | 0 | 0 | # | oh |
| 1022 | 1 | 3 | -1.050000 | 9.843781651  | 0.003976970 | 12.393982417 | 0 | 0 | 0 | # | ob |
| 1023 | 1 | 4 | -0.950000 | 9.764307657  | 4.455490996 | 10.345082885 | 0 | 0 | 0 | # | oh |
| 1024 | 1 | 3 | -1.050000 | 7.255431651  | 4.458526970 | 12.393982417 | 0 | 0 | 0 | # | ob |
| 1025 | 1 | 4 | -0.950000 | 8.354142343  | 8.908159004 | 8.319917115  | 0 | 0 | 0 | # | oh |
| 1026 | 1 | 3 | -1.050000 | 5.686318349  | 8.905123030 | 6.271017583  | 0 | 0 | 0 | # | ob |
| 1027 | 1 | 4 | -0.950000 | 5.765792343  | 4.453609004 | 8.319917115  | 0 | 0 | 0 | # | oh |
| 1028 | 1 | 3 | -1.050000 | 8.274668349  | 4.450573030 | 6.271017583  | 0 | 0 | 0 | # | ob |
| 1029 | 1 | 3 | -1.050000 | 9.371505513  | 1.680900680 | 10.366131378 | 0 | 0 | 0 | # | ob |
| 1030 | 1 | 3 | -1.050000 | 5.330210908  | 6.314939700 | 12.565579711 | 0 | 0 | 0 | # | ob |
| 1031 | 1 | 3 | -1.050000 | 8.746364655  | 6.132051481 | 8.299077932  | 0 | 0 | 0 | # | ob |
| 1032 | 1 | 3 | -1.050000 | 7.611867264  | 1.850546126 | 6.100653738  | 0 | 0 | 0 | # | ob |
| 1033 | 1 | 5 | 2.100000  | 9.399697014  | 1.527119204 | 11.995277170 | 0 | 0 | 0 | # | st |
| 1034 | 1 | 5 | 2.100000  | 8.718727774  | 5.973370782 | 6.670701903  | 0 | 0 | 0 | # | st |
| 1035 | 1 | 5 | 2.100000  | 6.130402986  | 7.381980796 | 6.669722830  | 0 | 0 | 0 | # | st |
| 1036 | 1 | 5 | 2.100000  | 8.718752986  | 2.927430796 | 6.669722830  | 0 | 0 | 0 | # | st |
| 1037 | 1 | 5 | 2.100000  | 9.399722226  | 7.390279218 | 11.994298097 | 0 | 0 | 0 | # | st |
| 1038 | 1 | 5 | 2.100000  | 6.811372226  | 2.935729218 | 11.994298097 | 0 | 0 | 0 | # | st |
| 1039 | 1 | 5 | 2.100000  | 6.811347014  | 5.981669204 | 11.995277170 | 0 | 0 | 0 | # | st |
| 1040 | 1 | 5 | 2.100000  | 6.130377774  | 1.518820782 | 6.670701903  | 0 | 0 | 0 | # | st |
| 1041 | 1 | 1 | 1.575000  | 12.941955029 | 1.474661568 | 9.332770632  | 0 | 0 | 0 | # | ao |
| 1042 | 1 | 1 | 1.575000  | 10.353605029 | 5.929211568 | 9.332770632  | 0 | 0 | 0 | # | ao |
| 1043 | 1 | 1 | 1.575000  | 12.941544971 | 7.434438432 | 9.332229368  | 0 | 0 | 0 | # | ao |
| 1044 | 1 | 1 | 1.575000  | 15.529894971 | 2.979888432 | 9.332229368  | 0 | 0 | 0 | # | ao |
| 1045 | 1 | 2 | 0.425000  | 14.088050872 | 4.457267322 | 10.818615063 | 0 | 0 | 0 | # | ho |
| 1046 | 1 | 2 | 0.425000  | 11.499700872 | 0.002717322 | 10.818615063 | 0 | 0 | 0 | # | ho |
| 1047 | 1 | 2 | 0.425000  | 11.795449128 | 4.451832678 | 7.846384937  | 0 | 0 | 0 | # | ho |
| 1048 | 1 | 2 | 0.425000  | 14.383799128 | 8.906382678 | 7.846384937  | 0 | 0 | 0 | # | ho |
| 1049 | 1 | 3 | -1.050000 | 11.334714655 | 1.677501481 | 8.299077932  | 0 | 0 | 0 | # | ob |
| 1050 | 1 | 3 | -1.050000 | 15.376917264 | 6.305096126 | 6.100653738  | 0 | 0 | 0 | # | ob |
| 1051 | 1 | 3 | -1.050000 | 13.923644487 | 2.773649320 | 8.298868622  | 0 | 0 | 0 | # | ob |
| 1052 | 1 | 3 | -1.050000 | 12.788239092 | 7.048710300 | 6.099420289  | 0 | 0 | 0 | # | ob |
| 1053 | 1 | 3 | -1.050000 | 11.335294487 | 7.228199320 | 8.298868622  | 0 | 0 | 0 | # | ob |
| 1054 | 1 | 3 | -1.050000 | 11.959855513 | 6.135450680 | 10.366131378 | 0 | 0 | 0 | # | ob |
| 1055 | 1 | 3 | -1.050000 | 15.376589092 | 2.594160300 | 6.099420289  | 0 | 0 | 0 | # | ob |
| 1056 | 1 | 3 | -1.050000 | 11.960435345 | 2.777048519 | 10.365922068 | 0 | 0 | 0 | # | ob |
| 1057 | 1 | 3 | -1.050000 | 13.094932736 | 7.058553874 | 12.564346262 | 0 | 0 | 0 | # | ob |
| 1058 | 1 | 3 | -1.050000 | 14.548785345 | 7.231598519 | 10.365922068 | 0 | 0 | 0 | # | ob |
| 1059 | 1 | 3 | -1.050000 | 10.506582736 | 2.604003874 | 12.564346262 | 0 | 0 | 0 | # | ob |
| 1060 | 1 | 3 | -1.050000 | 13.095260908 | 1.860389700 | 12.565579711 | 0 | 0 | 0 | # | ob |
| 1061 | 1 | 4 | -0.950000 | 12.352657657 | 0.000940996 | 10.345082885 | 0 | 0 | 0 | # | oh |
| 1062 | 1 | 3 | -1.050000 | 15.020481651 | 0.003976970 | 12.393982417 | 0 | 0 | 0 | # | ob |
| 1063 | 1 | 4 | -0.950000 | 14.941007657 | 4.455490996 | 10.345082885 | 0 | 0 | 0 | # | oh |

|      |   |   |           |               |             |              |   |   |   |    |
|------|---|---|-----------|---------------|-------------|--------------|---|---|---|----|
| 1064 | 1 | 3 | -1.050000 | 12.432131651  | 4.458526970 | 12.393982417 | 0 | 0 | 0 | ob |
| 1065 | 1 | 4 | -0.950000 | 13.530842343  | 8.908159004 | 8.319917115  | 0 | 0 | 0 | oh |
| 1066 | 1 | 3 | -1.050000 | 10.863018349  | 8.905123030 | 6.271017583  | 0 | 0 | 0 | ob |
| 1067 | 1 | 4 | -0.950000 | 10.942492343  | 4.453609004 | 8.319917115  | 0 | 0 | 0 | oh |
| 1068 | 1 | 3 | -1.050000 | 13.451368349  | 4.450573030 | 6.271017583  | 0 | 0 | 0 | ob |
| 1069 | 1 | 3 | -1.050000 | 14.548205513  | 1.680900680 | 10.366131378 | 0 | 0 | 0 | ob |
| 1070 | 1 | 3 | -1.050000 | 10.506910908  | 6.314939700 | 12.565579711 | 0 | 0 | 0 | ob |
| 1071 | 1 | 3 | -1.050000 | 13.923064655  | 6.132051481 | 8.299077932  | 0 | 0 | 0 | ob |
| 1072 | 1 | 3 | -1.050000 | 12.788567264  | 1.850546126 | 6.100653738  | 0 | 0 | 0 | ob |
| 1073 | 1 | 5 | 2.100000  | 14.576397014  | 1.527119204 | 11.995277170 | 0 | 0 | 0 | st |
| 1074 | 1 | 5 | 2.100000  | 13.895427774  | 5.973370782 | 6.670701903  | 0 | 0 | 0 | st |
| 1075 | 1 | 5 | 2.100000  | 11.307102986  | 7.381980796 | 6.669722830  | 0 | 0 | 0 | st |
| 1076 | 1 | 5 | 2.100000  | 13.895452986  | 2.927430796 | 6.669722830  | 0 | 0 | 0 | st |
| 1077 | 1 | 5 | 2.100000  | 14.576422226  | 7.390279218 | 11.994298097 | 0 | 0 | 0 | st |
| 1078 | 1 | 5 | 2.100000  | 11.988072226  | 2.935729218 | 11.994298097 | 0 | 0 | 0 | st |
| 1079 | 1 | 5 | 2.100000  | 11.988047014  | 5.981669204 | 11.995277170 | 0 | 0 | 0 | st |
| 1080 | 1 | 5 | 2.100000  | 11.307077774  | 1.518820782 | 6.670701903  | 0 | 0 | 0 | st |
| 1081 | 1 | 1 | 1.575000  | -12.941544971 | 1.474661568 | 9.332770632  | 1 | 0 | 0 | ao |
| 1082 | 1 | 1 | 1.575000  | -15.529894971 | 5.929211568 | 9.332770632  | 1 | 0 | 0 | ao |
| 1083 | 1 | 1 | 1.575000  | -12.941955029 | 7.434438432 | 9.332229368  | 1 | 0 | 0 | ao |
| 1084 | 1 | 1 | 1.575000  | -10.353605029 | 2.979888432 | 9.332229368  | 1 | 0 | 0 | ao |
| 1085 | 1 | 2 | 0.425000  | -11.795449128 | 4.457267322 | 10.818615063 | 1 | 0 | 0 | ho |
| 1086 | 1 | 2 | 0.425000  | -14.383799128 | 0.002717322 | 10.818615063 | 1 | 0 | 0 | ho |
| 1087 | 1 | 2 | 0.425000  | -14.088050872 | 4.451832678 | 7.846384937  | 1 | 0 | 0 | ho |
| 1088 | 1 | 2 | 0.425000  | -11.499700872 | 8.906382678 | 7.846384937  | 1 | 0 | 0 | ho |
| 1089 | 1 | 3 | -1.050000 | -14.548785345 | 1.677501481 | 8.299077932  | 1 | 0 | 0 | ob |
| 1090 | 1 | 3 | -1.050000 | -10.506582736 | 6.305096126 | 6.100653738  | 1 | 0 | 0 | ob |
| 1091 | 1 | 3 | -1.050000 | -11.959855513 | 2.773649320 | 8.298868622  | 1 | 0 | 0 | ob |
| 1092 | 1 | 3 | -1.050000 | -13.095260908 | 7.048710300 | 6.099420289  | 1 | 0 | 0 | ob |
| 1093 | 1 | 3 | -1.050000 | -14.548205513 | 7.228199320 | 8.298868622  | 1 | 0 | 0 | ob |
| 1094 | 1 | 3 | -1.050000 | -13.923644487 | 6.135450680 | 10.366131378 | 1 | 0 | 0 | ob |
| 1095 | 1 | 3 | -1.050000 | -10.506910908 | 2.594160300 | 6.099420289  | 1 | 0 | 0 | ob |
| 1096 | 1 | 3 | -1.050000 | -13.923064655 | 2.777048519 | 10.365922068 | 1 | 0 | 0 | ob |
| 1097 | 1 | 3 | -1.050000 | -12.788567264 | 7.058553874 | 12.564346262 | 1 | 0 | 0 | ob |
| 1098 | 1 | 3 | -1.050000 | -11.334714655 | 7.231598519 | 10.365922068 | 1 | 0 | 0 | ob |
| 1099 | 1 | 3 | -1.050000 | -15.376917264 | 2.604003874 | 12.564346262 | 1 | 0 | 0 | ob |
| 1100 | 1 | 3 | -1.050000 | -12.788239092 | 1.860389700 | 12.565579711 | 1 | 0 | 0 | ob |
| 1101 | 1 | 4 | -0.950000 | -13.530842343 | 0.000940996 | 10.345082885 | 1 | 0 | 0 | oh |
| 1102 | 1 | 3 | -1.050000 | -10.863018349 | 0.003976970 | 12.393982417 | 1 | 0 | 0 | ob |
| 1103 | 1 | 4 | -0.950000 | -10.942492343 | 4.455490996 | 10.345082885 | 1 | 0 | 0 | oh |
| 1104 | 1 | 3 | -1.050000 | -13.451368349 | 4.458526970 | 12.393982417 | 1 | 0 | 0 | ob |
| 1105 | 1 | 4 | -0.950000 | -12.352657657 | 8.908159004 | 8.319917115  | 1 | 0 | 0 | oh |
| 1106 | 1 | 3 | -1.050000 | -15.020481651 | 8.905123030 | 6.271017583  | 1 | 0 | 0 | ob |
| 1107 | 1 | 4 | -0.950000 | -14.941007657 | 4.453609004 | 8.319917115  | 1 | 0 | 0 | oh |
| 1108 | 1 | 3 | -1.050000 | -12.432131651 | 4.450573030 | 6.271017583  | 1 | 0 | 0 | ob |
| 1109 | 1 | 3 | -1.050000 | -11.335294487 | 1.680900680 | 10.366131378 | 1 | 0 | 0 | ob |
| 1110 | 1 | 3 | -1.050000 | -15.376589092 | 6.314939700 | 12.565579711 | 1 | 0 | 0 | ob |
| 1111 | 1 | 3 | -1.050000 | -11.960435345 | 6.132051481 | 8.299077932  | 1 | 0 | 0 | ob |
| 1112 | 1 | 3 | -1.050000 | -13.094932736 | 1.850546126 | 6.100653738  | 1 | 0 | 0 | ob |
| 1113 | 1 | 5 | 2.100000  | -11.307102986 | 1.527119204 | 11.995277170 | 1 | 0 | 0 | st |
| 1114 | 1 | 5 | 2.100000  | -11.988072226 | 5.973370782 | 6.670701903  | 1 | 0 | 0 | st |
| 1115 | 1 | 5 | 2.100000  | -14.576397014 | 7.381980796 | 6.669722830  | 1 | 0 | 0 | st |
| 1116 | 1 | 5 | 2.100000  | -11.988047014 | 2.927430796 | 6.669722830  | 1 | 0 | 0 | st |
| 1117 | 1 | 5 | 2.100000  | -11.307077774 | 7.390279218 | 11.994298097 | 1 | 0 | 0 | st |
| 1118 | 1 | 5 | 2.100000  | -13.895427774 | 2.935729218 | 11.994298097 | 1 | 0 | 0 | st |
| 1119 | 1 | 5 | 2.100000  | -13.895452986 | 5.981669204 | 11.995277170 | 1 | 0 | 0 | st |
| 1120 | 1 | 5 | 2.100000  | -14.576422226 | 1.518820782 | 6.670701903  | 1 | 0 | 0 | st |
| 1121 | 1 | 1 | 1.575000  | -7.764844971  | 1.474661568 | 9.332770632  | 1 | 0 | 0 | ao |
| 1122 | 1 | 1 | 1.575000  | -10.353194971 | 5.929211568 | 9.332770632  | 1 | 0 | 0 | ao |
| 1123 | 1 | 1 | 1.575000  | -7.765255029  | 7.434438432 | 9.332229368  | 1 | 0 | 0 | ao |
| 1124 | 1 | 1 | 1.575000  | -5.176905029  | 2.979888432 | 9.332229368  | 1 | 0 | 0 | ao |
| 1125 | 1 | 2 | 0.425000  | -6.618749128  | 4.457267322 | 10.818615063 | 1 | 0 | 0 | ho |
| 1126 | 1 | 2 | 0.425000  | -9.207099128  | 0.002717322 | 10.818615063 | 1 | 0 | 0 | ho |
| 1127 | 1 | 2 | 0.425000  | -8.911350872  | 4.451832678 | 7.846384937  | 1 | 0 | 0 | ho |
| 1128 | 1 | 2 | 0.425000  | -6.323000872  | 8.906382678 | 7.846384937  | 1 | 0 | 0 | ho |
| 1129 | 1 | 3 | -1.050000 | -9.372085345  | 1.677501481 | 8.299077932  | 1 | 0 | 0 | ob |
| 1130 | 1 | 3 | -1.050000 | -5.329882736  | 6.305096126 | 6.100653738  | 1 | 0 | 0 | ob |
| 1131 | 1 | 3 | -1.050000 | -6.783155513  | 2.773649320 | 8.298868622  | 1 | 0 | 0 | ob |
| 1132 | 1 | 3 | -1.050000 | -7.918560908  | 7.048710300 | 6.099420289  | 1 | 0 | 0 | ob |
| 1133 | 1 | 3 | -1.050000 | -9.371505513  | 7.228199320 | 8.298868622  | 1 | 0 | 0 | ob |
| 1134 | 1 | 3 | -1.050000 | -8.746944487  | 6.135450680 | 10.366131378 | 1 | 0 | 0 | ob |
| 1135 | 1 | 3 | -1.050000 | -5.330210908  | 2.594160300 | 6.099420289  | 1 | 0 | 0 | ob |
| 1136 | 1 | 3 | -1.050000 | -8.746364655  | 2.777048519 | 10.365922068 | 1 | 0 | 0 | ob |
| 1137 | 1 | 3 | -1.050000 | -7.611867264  | 7.058553874 | 12.564346262 | 1 | 0 | 0 | ob |
| 1138 | 1 | 3 | -1.050000 | -6.158014655  | 7.231598519 | 10.365922068 | 1 | 0 | 0 | ob |
| 1139 | 1 | 3 | -1.050000 | -10.200217264 | 2.604003874 | 12.564346262 | 1 | 0 | 0 | ob |
| 1140 | 1 | 3 | -1.050000 | -7.611539092  | 1.860389700 | 12.565579711 | 1 | 0 | 0 | ob |
| 1141 | 1 | 4 | -0.950000 | -8.354142343  | 0.000940996 | 10.345082885 | 1 | 0 | 0 | oh |
| 1142 | 1 | 3 | -1.050000 | -5.686318349  | 0.003976970 | 12.393982417 | 1 | 0 | 0 | ob |
| 1143 | 1 | 4 | -0.950000 | -5.765792343  | 4.455490996 | 10.345082885 | 1 | 0 | 0 | oh |
| 1144 | 1 | 3 | -1.050000 | -8.274668349  | 4.458526970 | 12.393982417 | 1 | 0 | 0 | ob |
| 1145 | 1 | 4 | -0.950000 | -7.175957657  | 8.908159004 | 8.319917115  | 1 | 0 | 0 | oh |
| 1146 | 1 | 3 | -1.050000 | -9.843781651  | 8.905123030 | 6.271017583  | 1 | 0 | 0 | ob |
| 1147 | 1 | 4 | -0.950000 | -9.764307657  | 4.453609004 | 8.319917115  | 1 | 0 | 0 | oh |
| 1148 | 1 | 3 | -1.050000 | -7.255431651  | 4.450573030 | 6.271017583  | 1 | 0 | 0 | ob |
| 1149 | 1 | 3 | -1.050000 | -6.158594487  | 1.680900680 | 10.366131378 | 1 | 0 | 0 | ob |
| 1150 | 1 | 3 | -1.050000 | -10.199890902 | 6.314939700 | 12.565579711 | 1 | 0 | 0 | ob |
| 1151 | 1 | 3 | -1.050000 | -6.783735345  | 6.132051481 | 8.299077932  | 1 | 0 | 0 | ob |
| 1152 | 1 | 3 | -1.050000 | -7.918232736  | 1.850546126 | 6.100653738  | 1 | 0 | 0 | ob |
| 1153 | 1 | 5 | 2.100000  | -6.130402986  | 1.527119204 | 11.995277170 | 1 | 0 | 0 | st |
| 1154 | 1 | 5 | 2.100000  | -6.811372226  | 5.973370782 | 6.670701903  | 1 | 0 | 0 | st |
| 1155 | 1 | 5 | 2.100000  | -9.399697014  | 7.381980796 | 6.669722830  | 1 | 0 | 0 | st |
| 1156 | 1 | 5 | 2.100000  | -6.811347014  | 2.927430796 | 6.669722830  | 1 | 0 | 0 | st |

|      |   |   |           |              |              |              |   |   |   |   |    |
|------|---|---|-----------|--------------|--------------|--------------|---|---|---|---|----|
| 1157 | 1 | 5 | 2.100000  | -6.130377774 | 7.390279218  | 11.994298097 | 1 | 0 | 0 | # | st |
| 1158 | 1 | 5 | 2.100000  | -8.718727774 | 2.935729218  | 11.994298097 | 1 | 0 | 0 | # | st |
| 1159 | 1 | 5 | 2.100000  | -8.718752986 | 5.981669204  | 11.995277170 | 1 | 0 | 0 | # | st |
| 1160 | 1 | 5 | 2.100000  | -9.399722226 | 1.518820782  | 6.670701903  | 1 | 0 | 0 | # | st |
| 1161 | 1 | 1 | 1.575000  | -2.588144971 | 1.474661568  | 9.332770632  | 1 | 0 | 0 | # | ao |
| 1162 | 1 | 1 | 1.575000  | -5.176494971 | 5.929211568  | 9.332770632  | 1 | 0 | 0 | # | ao |
| 1163 | 1 | 1 | 1.575000  | -2.588555029 | 7.434438432  | 9.332229368  | 1 | 0 | 0 | # | ao |
| 1164 | 1 | 1 | 1.575000  | -0.000205029 | 2.979888432  | 9.332229368  | 1 | 0 | 0 | # | ao |
| 1165 | 1 | 2 | 0.425000  | -1.442049128 | 4.457267322  | 10.818615063 | 1 | 0 | 0 | # | ho |
| 1166 | 1 | 2 | 0.425000  | -4.030399128 | 0.002717322  | 10.818615063 | 1 | 0 | 0 | # | ho |
| 1167 | 1 | 2 | 0.425000  | -3.734650872 | 4.451832678  | 7.846384937  | 1 | 0 | 0 | # | ho |
| 1168 | 1 | 2 | 0.425000  | -1.146300872 | 8.906382678  | 7.846384937  | 1 | 0 | 0 | # | ho |
| 1169 | 1 | 3 | -1.050000 | -4.195385345 | 1.677501481  | 8.299077932  | 1 | 0 | 0 | # | ob |
| 1170 | 1 | 3 | -1.050000 | -0.153182736 | 6.305096126  | 6.100653738  | 1 | 0 | 0 | # | ob |
| 1171 | 1 | 3 | -1.050000 | -1.606455513 | 2.773649320  | 8.298868622  | 1 | 0 | 0 | # | ob |
| 1172 | 1 | 3 | -1.050000 | -2.741860908 | 7.048710300  | 6.099420289  | 1 | 0 | 0 | # | ob |
| 1173 | 1 | 3 | -1.050000 | -4.194805513 | 7.228199320  | 8.298868622  | 1 | 0 | 0 | # | ob |
| 1174 | 1 | 3 | -1.050000 | -3.570244487 | 6.135450680  | 10.366131378 | 1 | 0 | 0 | # | ob |
| 1175 | 1 | 3 | -1.050000 | -0.153510908 | 2.594160300  | 6.099420289  | 1 | 0 | 0 | # | ob |
| 1176 | 1 | 3 | -1.050000 | -3.569664655 | 2.777048519  | 10.365922068 | 1 | 0 | 0 | # | ob |
| 1177 | 1 | 3 | -1.050000 | -2.435167264 | 7.058553874  | 12.564346262 | 1 | 0 | 0 | # | ob |
| 1178 | 1 | 3 | -1.050000 | -0.981314655 | 7.231598519  | 10.365922068 | 1 | 0 | 0 | # | ob |
| 1179 | 1 | 3 | -1.050000 | -5.023517264 | 2.604003874  | 12.564346262 | 1 | 0 | 0 | # | ob |
| 1180 | 1 | 3 | -1.050000 | -2.434839092 | 1.860389700  | 12.565579711 | 1 | 0 | 0 | # | ob |
| 1181 | 1 | 4 | -0.950000 | -3.177442343 | 0.000940996  | 10.345082885 | 1 | 0 | 0 | # | oh |
| 1182 | 1 | 3 | -1.050000 | -0.509618349 | 0.003976970  | 12.393982417 | 1 | 0 | 0 | # | ob |
| 1183 | 1 | 4 | -0.950000 | -0.589092343 | 4.455490996  | 10.345082885 | 1 | 0 | 0 | # | oh |
| 1184 | 1 | 3 | -1.050000 | -3.097968349 | 4.458526970  | 12.393982417 | 1 | 0 | 0 | # | ob |
| 1185 | 1 | 4 | -0.950000 | -1.999257657 | 8.908159004  | 8.319917115  | 1 | 0 | 0 | # | oh |
| 1186 | 1 | 3 | -1.050000 | -4.667081651 | 8.905123030  | 6.271017583  | 1 | 0 | 0 | # | ob |
| 1187 | 1 | 4 | -0.950000 | -4.587607657 | 4.453609004  | 8.319917115  | 1 | 0 | 0 | # | oh |
| 1188 | 1 | 3 | -1.050000 | -2.078731651 | 4.450573030  | 6.271017583  | 1 | 0 | 0 | # | ob |
| 1189 | 1 | 3 | -1.050000 | -0.981894487 | 1.680900680  | 10.366131378 | 1 | 0 | 0 | # | ob |
| 1190 | 1 | 3 | -1.050000 | -5.023189092 | 6.314939700  | 12.565579711 | 1 | 0 | 0 | # | ob |
| 1191 | 1 | 3 | -1.050000 | -1.607035345 | 6.132051481  | 8.299077932  | 1 | 0 | 0 | # | ob |
| 1192 | 1 | 3 | -1.050000 | -2.741532736 | 1.850546126  | 6.100653738  | 1 | 0 | 0 | # | ob |
| 1193 | 1 | 5 | 2.100000  | -0.953702986 | 1.527119204  | 11.995277170 | 1 | 0 | 0 | # | st |
| 1194 | 1 | 5 | 2.100000  | -1.634672226 | 5.973370782  | 6.670701903  | 1 | 0 | 0 | # | st |
| 1195 | 1 | 5 | 2.100000  | -4.222997014 | 7.381980796  | 6.669722830  | 1 | 0 | 0 | # | st |
| 1196 | 1 | 5 | 2.100000  | -1.634647014 | 2.927430796  | 6.669722830  | 1 | 0 | 0 | # | st |
| 1197 | 1 | 5 | 2.100000  | -0.953677774 | 7.390279218  | 11.994298097 | 1 | 0 | 0 | # | st |
| 1198 | 1 | 5 | 2.100000  | -3.542027774 | 2.935729218  | 11.994298097 | 1 | 0 | 0 | # | st |
| 1199 | 1 | 5 | 2.100000  | -3.542052986 | 5.981669204  | 11.995277170 | 1 | 0 | 0 | # | st |
| 1200 | 1 | 5 | 2.100000  | -4.223022226 | 1.518820782  | 6.670701903  | 1 | 0 | 0 | # | st |
| 1201 | 1 | 1 | 1.575000  | 2.588555029  | 10.383761568 | 9.332770632  | 0 | 0 | 0 | # | ao |
| 1202 | 1 | 1 | 1.575000  | 0.000205029  | 14.838311568 | 9.332770632  | 0 | 0 | 0 | # | ao |
| 1203 | 1 | 1 | 1.575000  | 2.588144971  | 16.343538432 | 9.332229368  | 0 | 0 | 0 | # | ao |
| 1204 | 1 | 1 | 1.575000  | 5.176494971  | 11.888988432 | 9.332229368  | 0 | 0 | 0 | # | ao |
| 1205 | 1 | 2 | 0.425000  | 3.734650872  | 13.366367322 | 10.818615063 | 0 | 0 | 0 | # | ho |
| 1206 | 1 | 2 | 0.425000  | 1.146300872  | 8.911817322  | 10.818615063 | 0 | 0 | 0 | # | ho |
| 1207 | 1 | 2 | 0.425000  | 1.442049128  | 13.360932678 | 7.846384937  | 0 | 0 | 0 | # | ho |
| 1208 | 1 | 2 | 0.425000  | 4.030399128  | 17.815482678 | 7.846384937  | 0 | 0 | 0 | # | ho |
| 1209 | 1 | 3 | -1.050000 | 0.981314655  | 10.586601481 | 8.299077932  | 0 | 0 | 0 | # | ob |
| 1210 | 1 | 3 | -1.050000 | 5.023517264  | 15.214196126 | 6.100653738  | 0 | 0 | 0 | # | ob |
| 1211 | 1 | 3 | -1.050000 | 3.570244487  | 11.682749320 | 8.298868622  | 0 | 0 | 0 | # | ob |
| 1212 | 1 | 3 | -1.050000 | 2.434839092  | 15.957810300 | 6.099420289  | 0 | 0 | 0 | # | ob |
| 1213 | 1 | 3 | -1.050000 | 0.981894487  | 16.137299320 | 8.298868622  | 0 | 0 | 0 | # | ob |
| 1214 | 1 | 3 | -1.050000 | 1.606455513  | 15.044550680 | 10.366131378 | 0 | 0 | 0 | # | ob |
| 1215 | 1 | 3 | -1.050000 | 5.023189092  | 11.503260300 | 6.099420289  | 0 | 0 | 0 | # | ob |
| 1216 | 1 | 3 | -1.050000 | 1.607035345  | 11.686148519 | 10.365922068 | 0 | 0 | 0 | # | ob |
| 1217 | 1 | 3 | -1.050000 | 2.741532736  | 15.967653874 | 12.564346262 | 0 | 0 | 0 | # | ob |
| 1218 | 1 | 3 | -1.050000 | 4.195385345  | 16.140698519 | 10.365922068 | 0 | 0 | 0 | # | ob |
| 1219 | 1 | 3 | -1.050000 | 0.153182736  | 11.513103874 | 12.564346262 | 0 | 0 | 0 | # | ob |
| 1220 | 1 | 3 | -1.050000 | 2.741860908  | 10.769489700 | 12.565579711 | 0 | 0 | 0 | # | ob |
| 1221 | 1 | 4 | -0.950000 | 1.999257657  | 8.910040996  | 10.345082885 | 0 | 0 | 0 | # | oh |
| 1222 | 1 | 3 | -1.050000 | 4.667081651  | 8.913076970  | 12.393982417 | 0 | 0 | 0 | # | ob |
| 1223 | 1 | 4 | -0.950000 | 4.587607657  | 13.364590996 | 10.345082885 | 0 | 0 | 0 | # | oh |
| 1224 | 1 | 3 | -1.050000 | 2.078731651  | 13.367626970 | 12.393982417 | 0 | 0 | 0 | # | ob |
| 1225 | 1 | 4 | -0.950000 | 3.177442343  | 17.817259004 | 8.319917115  | 0 | 0 | 0 | # | oh |
| 1226 | 1 | 3 | -1.050000 | 0.509618349  | 17.814223030 | 6.271017583  | 0 | 0 | 0 | # | ob |
| 1227 | 1 | 4 | -0.950000 | 0.589092343  | 13.362709004 | 8.319917115  | 0 | 0 | 0 | # | oh |
| 1228 | 1 | 3 | -1.050000 | 3.097968349  | 13.359673030 | 6.271017583  | 0 | 0 | 0 | # | ob |
| 1229 | 1 | 3 | -1.050000 | 4.194805513  | 10.590000680 | 10.366131378 | 0 | 0 | 0 | # | ob |
| 1230 | 1 | 3 | -1.050000 | 0.153510908  | 15.224039700 | 12.565579711 | 0 | 0 | 0 | # | ob |
| 1231 | 1 | 3 | -1.050000 | 3.569664655  | 15.041151481 | 8.299077932  | 0 | 0 | 0 | # | ob |
| 1232 | 1 | 3 | -1.050000 | 2.435167264  | 10.759646126 | 6.100653738  | 0 | 0 | 0 | # | ob |
| 1233 | 1 | 5 | 2.100000  | 4.222997014  | 10.436219204 | 11.995277170 | 0 | 0 | 0 | # | st |
| 1234 | 1 | 5 | 2.100000  | 3.542027774  | 14.882470782 | 6.670701903  | 0 | 0 | 0 | # | st |
| 1235 | 1 | 5 | 2.100000  | 0.953702986  | 16.291080796 | 6.669722830  | 0 | 0 | 0 | # | st |
| 1236 | 1 | 5 | 2.100000  | 3.542052986  | 11.836530796 | 6.669722830  | 0 | 0 | 0 | # | st |
| 1237 | 1 | 5 | 2.100000  | 4.223022226  | 16.299379218 | 11.994298097 | 0 | 0 | 0 | # | st |
| 1238 | 1 | 5 | 2.100000  | 1.634672226  | 11.844829218 | 11.994298097 | 0 | 0 | 0 | # | st |
| 1239 | 1 | 5 | 2.100000  | 1.634647014  | 14.890769204 | 11.995277170 | 0 | 0 | 0 | # | st |
| 1240 | 1 | 5 | 2.100000  | 0.953677774  | 10.427920782 | 6.670701903  | 0 | 0 | 0 | # | st |
| 1241 | 1 | 1 | 1.575000  | 7.765255029  | 10.383761568 | 9.332770632  | 0 | 0 | 0 | # | ao |
| 1242 | 1 | 1 | 1.575000  | 5.176905029  | 14.838311568 | 9.332770632  | 0 | 0 | 0 | # | ao |
| 1243 | 1 | 1 | 1.575000  | 7.764844971  | 16.343538432 | 9.332229368  | 0 | 0 | 0 | # | ao |
| 1244 | 1 | 1 | 1.575000  | 10.353194971 | 11.888988432 | 9.332229368  | 0 | 0 | 0 | # | ao |
| 1245 | 1 | 2 | 0.425000  | 8.911350872  | 13.366367322 | 10.818615063 | 0 | 0 | 0 | # | ho |
| 1246 | 1 | 2 | 0.425000  | 6.323000872  | 8.911817322  | 10.818615063 | 0 | 0 | 0 | # | ho |
| 1247 | 1 | 2 | 0.425000  | 6.618749128  | 13.360932678 | 7.846384937  | 0 | 0 | 0 | # | ho |
| 1248 | 1 | 2 | 0.425000  | 9.207099128  | 17.815482678 | 7.846384937  | 0 | 0 | 0 | # | ho |
| 1249 | 1 | 3 | -1.050000 | 6.158014655  | 10.586601481 | 8.299077932  | 0 | 0 | 0 | # | ob |

|      |   |   |           |               |              |              |   |   |   |   |    |
|------|---|---|-----------|---------------|--------------|--------------|---|---|---|---|----|
| 1250 | 1 | 3 | -1.050000 | 10.200217264  | 15.214196126 | 6.100653738  | 0 | 0 | 0 | # | ob |
| 1251 | 1 | 3 | -1.050000 | 8.746944487   | 11.682749320 | 8.298868622  | 0 | 0 | 0 | # | ob |
| 1252 | 1 | 3 | -1.050000 | 7.611539092   | 15.957810300 | 6.099420289  | 0 | 0 | 0 | # | ob |
| 1253 | 1 | 3 | -1.050000 | 6.158594487   | 16.137299320 | 8.298868622  | 0 | 0 | 0 | # | ob |
| 1254 | 1 | 3 | -1.050000 | 6.783155513   | 15.044550680 | 10.366131378 | 0 | 0 | 0 | # | ob |
| 1255 | 1 | 3 | -1.050000 | 10.199889092  | 11.503260300 | 6.099420289  | 0 | 0 | 0 | # | ob |
| 1256 | 1 | 3 | -1.050000 | 6.783735345   | 11.686148519 | 10.365922068 | 0 | 0 | 0 | # | ob |
| 1257 | 1 | 3 | -1.050000 | 7.918232736   | 15.967653874 | 12.564346262 | 0 | 0 | 0 | # | ob |
| 1258 | 1 | 3 | -1.050000 | 9.372085345   | 16.140698519 | 10.365922068 | 0 | 0 | 0 | # | ob |
| 1259 | 1 | 3 | -1.050000 | 5.329882736   | 11.513103874 | 12.564346262 | 0 | 0 | 0 | # | ob |
| 1260 | 1 | 3 | -1.050000 | 7.918560908   | 10.769489700 | 12.565579711 | 0 | 0 | 0 | # | ob |
| 1261 | 1 | 4 | -0.950000 | 7.175957657   | 8.910040996  | 10.345082885 | 0 | 0 | 0 | # | oh |
| 1262 | 1 | 3 | -1.050000 | 9.843781651   | 8.913076970  | 12.393982417 | 0 | 0 | 0 | # | ob |
| 1263 | 1 | 4 | -0.950000 | 9.764307657   | 13.364590996 | 10.345082885 | 0 | 0 | 0 | # | oh |
| 1264 | 1 | 3 | -1.050000 | 7.255431651   | 13.367626970 | 12.393982417 | 0 | 0 | 0 | # | ob |
| 1265 | 1 | 4 | -0.950000 | 8.354142343   | 17.817259004 | 8.319917115  | 0 | 0 | 0 | # | oh |
| 1266 | 1 | 3 | -1.050000 | 5.686318349   | 17.814223030 | 6.271017583  | 0 | 0 | 0 | # | ob |
| 1267 | 1 | 4 | -0.950000 | 5.765792343   | 13.362709004 | 8.319917115  | 0 | 0 | 0 | # | oh |
| 1268 | 1 | 3 | -1.050000 | 8.274668349   | 13.359673030 | 6.271017583  | 0 | 0 | 0 | # | ob |
| 1269 | 1 | 3 | -1.050000 | 9.371505513   | 10.590000680 | 10.366131378 | 0 | 0 | 0 | # | ob |
| 1270 | 1 | 3 | -1.050000 | 5.330210908   | 15.224039700 | 12.565579711 | 0 | 0 | 0 | # | ob |
| 1271 | 1 | 3 | -1.050000 | 8.746364655   | 15.041151481 | 8.299077932  | 0 | 0 | 0 | # | ob |
| 1272 | 1 | 3 | -1.050000 | 7.611867264   | 10.759646126 | 6.100653738  | 0 | 0 | 0 | # | ob |
| 1273 | 1 | 5 | 2.100000  | 9.399697014   | 10.436219204 | 11.995277170 | 0 | 0 | 0 | # | st |
| 1274 | 1 | 5 | 2.100000  | 8.718277774   | 14.882470782 | 6.670701903  | 0 | 0 | 0 | # | st |
| 1275 | 1 | 5 | 2.100000  | 6.130402986   | 16.291080796 | 6.669722830  | 0 | 0 | 0 | # | st |
| 1276 | 1 | 5 | 2.100000  | 8.718752986   | 11.836530796 | 6.669722830  | 0 | 0 | 0 | # | st |
| 1277 | 1 | 5 | 2.100000  | 9.399722226   | 16.299379218 | 11.994298097 | 0 | 0 | 0 | # | st |
| 1278 | 1 | 5 | 2.100000  | 6.811372226   | 11.844829218 | 11.994298097 | 0 | 0 | 0 | # | st |
| 1279 | 1 | 5 | 2.100000  | 6.811347014   | 14.890769204 | 11.995277170 | 0 | 0 | 0 | # | st |
| 1280 | 1 | 5 | 2.100000  | 6.130377774   | 10.427920782 | 6.670701903  | 0 | 0 | 0 | # | st |
| 1281 | 1 | 1 | 1.575000  | 12.941955029  | 10.383761568 | 9.332770632  | 0 | 0 | 0 | # | ao |
| 1282 | 1 | 1 | 1.575000  | 10.353605029  | 14.838311568 | 9.332770632  | 0 | 0 | 0 | # | ao |
| 1283 | 1 | 1 | 1.575000  | 12.941544971  | 16.343538432 | 9.332229368  | 0 | 0 | 0 | # | ao |
| 1284 | 1 | 1 | 1.575000  | 15.529894971  | 11.888988432 | 9.332229368  | 0 | 0 | 0 | # | ao |
| 1285 | 1 | 2 | 0.425000  | 14.088050872  | 13.366367322 | 10.818615063 | 0 | 0 | 0 | # | ho |
| 1286 | 1 | 2 | 0.425000  | 11.499700872  | 8.911817322  | 10.818615063 | 0 | 0 | 0 | # | ho |
| 1287 | 1 | 2 | 0.425000  | 11.795449128  | 13.360932678 | 7.846384937  | 0 | 0 | 0 | # | ho |
| 1288 | 1 | 2 | 0.425000  | 14.383799128  | 17.815482678 | 7.846384937  | 0 | 0 | 0 | # | ho |
| 1289 | 1 | 3 | -1.050000 | 11.334714655  | 10.586601481 | 8.299077932  | 0 | 0 | 0 | # | ob |
| 1290 | 1 | 3 | -1.050000 | 15.376917264  | 15.214196126 | 6.100653738  | 0 | 0 | 0 | # | ob |
| 1291 | 1 | 3 | -1.050000 | 13.923644487  | 11.682749320 | 8.298868622  | 0 | 0 | 0 | # | ob |
| 1292 | 1 | 3 | -1.050000 | 12.788239092  | 15.957810300 | 6.099420289  | 0 | 0 | 0 | # | ob |
| 1293 | 1 | 3 | -1.050000 | 11.335294487  | 16.137299320 | 8.298868622  | 0 | 0 | 0 | # | ob |
| 1294 | 1 | 3 | -1.050000 | 11.959855513  | 15.044550680 | 10.366131378 | 0 | 0 | 0 | # | ob |
| 1295 | 1 | 3 | -1.050000 | 15.376589092  | 11.503260300 | 6.099420289  | 0 | 0 | 0 | # | ob |
| 1296 | 1 | 3 | -1.050000 | 11.960435345  | 11.686148519 | 10.365922068 | 0 | 0 | 0 | # | ob |
| 1297 | 1 | 3 | -1.050000 | 13.094932736  | 15.967653874 | 12.564346262 | 0 | 0 | 0 | # | ob |
| 1298 | 1 | 3 | -1.050000 | 14.548785345  | 16.140698519 | 10.365922068 | 0 | 0 | 0 | # | ob |
| 1299 | 1 | 3 | -1.050000 | 10.506582736  | 11.513103874 | 12.564346262 | 0 | 0 | 0 | # | ob |
| 1300 | 1 | 3 | -1.050000 | 13.095260908  | 10.769489700 | 12.565579711 | 0 | 0 | 0 | # | ob |
| 1301 | 1 | 4 | -0.950000 | 12.352657657  | 8.910040996  | 10.345082885 | 0 | 0 | 0 | # | oh |
| 1302 | 1 | 3 | -1.050000 | 15.020481651  | 8.913076970  | 12.393982417 | 0 | 0 | 0 | # | ob |
| 1303 | 1 | 4 | -0.950000 | 14.941007657  | 13.364590996 | 10.345082885 | 0 | 0 | 0 | # | oh |
| 1304 | 1 | 3 | -1.050000 | 12.432131651  | 13.367626970 | 12.393982417 | 0 | 0 | 0 | # | ob |
| 1305 | 1 | 4 | -0.950000 | 13.530842343  | 17.817259004 | 8.319917115  | 0 | 0 | 0 | # | oh |
| 1306 | 1 | 3 | -1.050000 | 10.863018349  | 17.814223030 | 6.271017583  | 0 | 0 | 0 | # | ob |
| 1307 | 1 | 4 | -0.950000 | 10.942492343  | 13.362709004 | 8.319917115  | 0 | 0 | 0 | # | oh |
| 1308 | 1 | 3 | -1.050000 | 13.451368349  | 13.359673030 | 6.271017583  | 0 | 0 | 0 | # | ob |
| 1309 | 1 | 3 | -1.050000 | 14.548205513  | 10.590000680 | 10.366131378 | 0 | 0 | 0 | # | ob |
| 1310 | 1 | 3 | -1.050000 | 10.506910908  | 15.224039700 | 12.565579711 | 0 | 0 | 0 | # | ob |
| 1311 | 1 | 3 | -1.050000 | 13.923064655  | 15.041151481 | 8.299077932  | 0 | 0 | 0 | # | ob |
| 1312 | 1 | 3 | -1.050000 | 12.788567264  | 10.759646126 | 6.100653738  | 0 | 0 | 0 | # | ob |
| 1313 | 1 | 5 | 2.100000  | 14.576397014  | 10.436219204 | 11.995277170 | 0 | 0 | 0 | # | st |
| 1314 | 1 | 5 | 2.100000  | 13.895427774  | 14.882470782 | 6.670701903  | 0 | 0 | 0 | # | st |
| 1315 | 1 | 5 | 2.100000  | 11.307102986  | 16.291080796 | 6.669722830  | 0 | 0 | 0 | # | st |
| 1316 | 1 | 5 | 2.100000  | 13.895452986  | 11.836530796 | 6.669722830  | 0 | 0 | 0 | # | st |
| 1317 | 1 | 5 | 2.100000  | 14.576422226  | 16.299379218 | 11.994298097 | 0 | 0 | 0 | # | st |
| 1318 | 1 | 5 | 2.100000  | 11.988072226  | 11.844829218 | 11.994298097 | 0 | 0 | 0 | # | st |
| 1319 | 1 | 5 | 2.100000  | 11.988047014  | 14.890769204 | 11.995277170 | 0 | 0 | 0 | # | st |
| 1320 | 1 | 5 | 2.100000  | 11.307077774  | 10.427920782 | 6.670701903  | 0 | 0 | 0 | # | st |
| 1321 | 1 | 1 | 1.575000  | -12.941544971 | 10.383761568 | 9.332770632  | 1 | 0 | 0 | # | ao |
| 1322 | 1 | 1 | 1.575000  | -15.529894971 | 14.838311568 | 9.332770632  | 1 | 0 | 0 | # | ao |
| 1323 | 1 | 1 | 1.575000  | -12.941955029 | 16.343538432 | 9.332229368  | 1 | 0 | 0 | # | ao |
| 1324 | 1 | 1 | 1.575000  | -10.353605029 | 11.888988432 | 9.332229368  | 1 | 0 | 0 | # | ao |
| 1325 | 1 | 2 | 0.425000  | -11.795449128 | 13.366367322 | 10.818615063 | 1 | 0 | 0 | # | ho |
| 1326 | 1 | 2 | 0.425000  | -14.383799128 | 8.911817322  | 10.818615063 | 1 | 0 | 0 | # | ho |
| 1327 | 1 | 2 | 0.425000  | -14.088050872 | 13.360932678 | 7.846384937  | 1 | 0 | 0 | # | ho |
| 1328 | 1 | 2 | 0.425000  | -11.499700872 | 17.815482678 | 7.846384937  | 1 | 0 | 0 | # | ho |
| 1329 | 1 | 3 | -1.050000 | -14.548785345 | 10.586601481 | 8.299077932  | 1 | 0 | 0 | # | ob |
| 1330 | 1 | 3 | -1.050000 | -10.506582736 | 15.214196126 | 6.100653738  | 1 | 0 | 0 | # | ob |
| 1331 | 1 | 3 | -1.050000 | -11.959855513 | 11.682749320 | 8.298868622  | 1 | 0 | 0 | # | ob |
| 1332 | 1 | 3 | -1.050000 | -13.095260908 | 15.957810300 | 6.099420289  | 1 | 0 | 0 | # | ob |
| 1333 | 1 | 3 | -1.050000 | -14.548205513 | 16.137299320 | 8.298868622  | 1 | 0 | 0 | # | ob |
| 1334 | 1 | 3 | -1.050000 | -13.923644487 | 15.044550680 | 10.366131378 | 1 | 0 | 0 | # | ob |
| 1335 | 1 | 3 | -1.050000 | -10.506910908 | 11.503260300 | 6.099420289  | 1 | 0 | 0 | # | ob |
| 1336 | 1 | 3 | -1.050000 | -13.923064655 | 11.686148519 | 10.365922068 | 1 | 0 | 0 | # | ob |
| 1337 | 1 | 3 | -1.050000 | -12.788567264 | 15.967653874 | 12.564346262 | 1 | 0 | 0 | # | ob |
| 1338 | 1 | 3 | -1.050000 | -11.334714655 | 16.140698519 | 10.365922068 | 1 | 0 | 0 | # | ob |
| 1339 | 1 | 3 | -1.050000 | -15.376917264 | 11.513103874 | 12.564346262 | 1 | 0 | 0 | # | ob |
| 1340 | 1 | 3 | -1.050000 | -12.788239092 | 10.769489700 | 12.565579711 | 1 | 0 | 0 | # | ob |
| 1341 | 1 | 4 | -0.950000 | -13.530842343 | 8.910040996  | 10.345082885 | 1 | 0 | 0 | # | oh |
| 1342 | 1 | 3 | -1.050000 | -10.863018349 | 8.913076970  | 12.393982417 | 1 | 0 | 0 | # | ob |

|      |   |   |           |               |              |              |   |   |   |    |
|------|---|---|-----------|---------------|--------------|--------------|---|---|---|----|
| 1343 | 1 | 4 | -0.950000 | -10.942492343 | 13.364590996 | 10.345082885 | 1 | 0 | 0 | oh |
| 1344 | 1 | 3 | -1.050000 | -13.451368349 | 13.367626970 | 12.393982417 | 1 | 0 | 0 | ob |
| 1345 | 1 | 4 | -0.950000 | -12.352657657 | 17.817259004 | 8.319917115  | 1 | 0 | 0 | oh |
| 1346 | 1 | 3 | -1.050000 | -15.020481651 | 17.814223030 | 6.271017583  | 1 | 0 | 0 | ob |
| 1347 | 1 | 4 | -0.950000 | -14.941007657 | 13.362709004 | 8.319917115  | 1 | 0 | 0 | oh |
| 1348 | 1 | 3 | -1.050000 | -12.432131651 | 13.359673030 | 6.271017583  | 1 | 0 | 0 | ob |
| 1349 | 1 | 3 | -1.050000 | -11.335294487 | 10.590000680 | 10.366131378 | 1 | 0 | 0 | ob |
| 1350 | 1 | 3 | -1.050000 | -15.376589092 | 15.224039700 | 12.565579711 | 1 | 0 | 0 | ob |
| 1351 | 1 | 3 | -1.050000 | -11.960435345 | 15.041151481 | 8.299077932  | 1 | 0 | 0 | ob |
| 1352 | 1 | 3 | -1.050000 | -13.094932736 | 10.759646126 | 6.100653738  | 1 | 0 | 0 | ob |
| 1353 | 1 | 5 | 2.100000  | -11.307102986 | 10.436219204 | 11.995277170 | 1 | 0 | 0 | st |
| 1354 | 1 | 5 | 2.100000  | -11.988072226 | 14.882470782 | 6.670701903  | 1 | 0 | 0 | st |
| 1355 | 1 | 5 | 2.100000  | -14.576397014 | 16.291080796 | 6.669722830  | 1 | 0 | 0 | st |
| 1356 | 1 | 5 | 2.100000  | -11.988047014 | 11.836530796 | 6.669722830  | 1 | 0 | 0 | st |
| 1357 | 1 | 5 | 2.100000  | -11.307077774 | 16.299379218 | 11.994298097 | 1 | 0 | 0 | st |
| 1358 | 1 | 5 | 2.100000  | -13.895427774 | 11.844829218 | 11.994298097 | 1 | 0 | 0 | st |
| 1359 | 1 | 5 | 2.100000  | -13.895452986 | 14.890769204 | 11.995277170 | 1 | 0 | 0 | st |
| 1360 | 1 | 5 | 2.100000  | -14.576422226 | 10.427920782 | 6.670701903  | 1 | 0 | 0 | st |
| 1361 | 1 | 1 | 1.575000  | -7.764844971  | 10.383761568 | 9.332770632  | 1 | 0 | 0 | ao |
| 1362 | 1 | 1 | 1.575000  | -10.353194971 | 14.838311568 | 9.332770632  | 1 | 0 | 0 | ao |
| 1363 | 1 | 1 | 1.575000  | -7.765255029  | 16.343538432 | 9.332229368  | 1 | 0 | 0 | ao |
| 1364 | 1 | 1 | 1.575000  | -5.176905029  | 11.888988432 | 9.332229368  | 1 | 0 | 0 | ao |
| 1365 | 1 | 2 | 0.425000  | -6.618749128  | 13.366367322 | 10.818615063 | 1 | 0 | 0 | ho |
| 1366 | 1 | 2 | 0.425000  | -9.207099128  | 8.911817322  | 10.818615063 | 1 | 0 | 0 | ho |
| 1367 | 1 | 2 | 0.425000  | -8.911330872  | 13.360932678 | 7.846384937  | 1 | 0 | 0 | ho |
| 1368 | 1 | 2 | 0.425000  | -6.323000872  | 17.815482678 | 7.846384937  | 1 | 0 | 0 | ho |
| 1369 | 1 | 3 | -1.050000 | -9.372085345  | 10.586601481 | 8.299077932  | 1 | 0 | 0 | ob |
| 1370 | 1 | 3 | -1.050000 | -5.329882736  | 15.214196126 | 6.100653738  | 1 | 0 | 0 | ob |
| 1371 | 1 | 3 | -1.050000 | -6.783155513  | 11.682749320 | 8.298868622  | 1 | 0 | 0 | ob |
| 1372 | 1 | 3 | -1.050000 | -7.918560908  | 15.957810300 | 6.099420289  | 1 | 0 | 0 | ob |
| 1373 | 1 | 3 | -1.050000 | -9.371505513  | 16.137299320 | 8.298868622  | 1 | 0 | 0 | ob |
| 1374 | 1 | 3 | -1.050000 | -8.746944487  | 15.044550680 | 10.366131378 | 1 | 0 | 0 | ob |
| 1375 | 1 | 3 | -1.050000 | -5.330210908  | 11.503260300 | 6.099420289  | 1 | 0 | 0 | ob |
| 1376 | 1 | 3 | -1.050000 | -8.746364655  | 11.686148519 | 10.365922068 | 1 | 0 | 0 | ob |
| 1377 | 1 | 3 | -1.050000 | -7.611867264  | 15.967653874 | 12.564346262 | 1 | 0 | 0 | ob |
| 1378 | 1 | 3 | -1.050000 | -6.158014655  | 16.140698519 | 10.365922068 | 1 | 0 | 0 | ob |
| 1379 | 1 | 3 | -1.050000 | -10.200217264 | 11.513103874 | 12.564346262 | 1 | 0 | 0 | ob |
| 1380 | 1 | 3 | -1.050000 | -7.611539092  | 10.769489700 | 12.565579711 | 1 | 0 | 0 | ob |
| 1381 | 1 | 4 | -0.950000 | -8.354142343  | 8.910040996  | 10.345082885 | 1 | 0 | 0 | oh |
| 1382 | 1 | 3 | -1.050000 | -5.686318349  | 8.913076970  | 12.393982417 | 1 | 0 | 0 | ob |
| 1383 | 1 | 4 | -0.950000 | -5.765792343  | 13.364590996 | 10.345082885 | 1 | 0 | 0 | oh |
| 1384 | 1 | 3 | -1.050000 | -8.274668349  | 13.367626970 | 12.393982417 | 1 | 0 | 0 | ob |
| 1385 | 1 | 4 | -0.950000 | -7.175957657  | 17.817259004 | 8.319917115  | 1 | 0 | 0 | oh |
| 1386 | 1 | 3 | -1.050000 | -9.843781651  | 17.814223030 | 6.271017583  | 1 | 0 | 0 | ob |
| 1387 | 1 | 4 | -0.950000 | -9.764307657  | 13.362709004 | 8.319917115  | 1 | 0 | 0 | oh |
| 1388 | 1 | 3 | -1.050000 | -7.255431651  | 13.359673030 | 6.271017583  | 1 | 0 | 0 | ob |
| 1389 | 1 | 3 | -1.050000 | -6.158594487  | 10.590000680 | 10.366131378 | 1 | 0 | 0 | ob |
| 1390 | 1 | 3 | -1.050000 | -10.199889092 | 15.224039700 | 12.565579711 | 1 | 0 | 0 | ob |
| 1391 | 1 | 3 | -1.050000 | -6.783735345  | 15.041151481 | 8.299077932  | 1 | 0 | 0 | ob |
| 1392 | 1 | 3 | -1.050000 | -7.918232736  | 10.759646126 | 6.100653738  | 1 | 0 | 0 | ob |
| 1393 | 1 | 5 | 2.100000  | -6.130402986  | 10.436219204 | 11.995277170 | 1 | 0 | 0 | st |
| 1394 | 1 | 5 | 2.100000  | -6.811372226  | 14.882470782 | 6.670701903  | 1 | 0 | 0 | st |
| 1395 | 1 | 5 | 2.100000  | -9.399670114  | 16.291080796 | 6.669722830  | 1 | 0 | 0 | st |
| 1396 | 1 | 5 | 2.100000  | -6.811347014  | 11.836530796 | 6.669722830  | 1 | 0 | 0 | st |
| 1397 | 1 | 5 | 2.100000  | -6.130377774  | 16.299379218 | 11.994298097 | 1 | 0 | 0 | st |
| 1398 | 1 | 5 | 2.100000  | -8.718727774  | 11.844829218 | 11.994298097 | 1 | 0 | 0 | st |
| 1399 | 1 | 5 | 2.100000  | -8.718752986  | 14.890769204 | 11.995277170 | 1 | 0 | 0 | st |
| 1400 | 1 | 5 | 2.100000  | -9.399722226  | 10.427920782 | 6.670701903  | 1 | 0 | 0 | st |
| 1401 | 1 | 1 | 1.575000  | -2.588144971  | 10.383761568 | 9.332770632  | 1 | 0 | 0 | ao |
| 1402 | 1 | 1 | 1.575000  | -5.176494971  | 14.838311568 | 9.332770632  | 1 | 0 | 0 | ao |
| 1403 | 1 | 1 | 1.575000  | -2.588555029  | 16.343538432 | 9.332229368  | 1 | 0 | 0 | ao |
| 1404 | 1 | 1 | 1.575000  | -0.000205029  | 11.888988432 | 9.332229368  | 1 | 0 | 0 | ao |
| 1405 | 1 | 2 | 0.425000  | -1.442049128  | 13.366367322 | 10.818615063 | 1 | 0 | 0 | ho |
| 1406 | 1 | 2 | 0.425000  | -4.030399128  | 8.911817322  | 10.818615063 | 1 | 0 | 0 | ho |
| 1407 | 1 | 2 | 0.425000  | -3.734650872  | 13.360932678 | 7.846384937  | 1 | 0 | 0 | ho |
| 1408 | 1 | 2 | 0.425000  | -1.146300872  | 17.815482678 | 7.846384937  | 1 | 0 | 0 | ho |
| 1409 | 1 | 3 | -1.050000 | -4.195385345  | 10.586601481 | 8.299077932  | 1 | 0 | 0 | ob |
| 1410 | 1 | 3 | -1.050000 | -0.153182736  | 15.214196126 | 6.100653738  | 1 | 0 | 0 | ob |
| 1411 | 1 | 3 | -1.050000 | -1.606455513  | 11.682749320 | 8.298868622  | 1 | 0 | 0 | ob |
| 1412 | 1 | 3 | -1.050000 | -2.741860908  | 15.957810300 | 6.099420289  | 1 | 0 | 0 | ob |
| 1413 | 1 | 3 | -1.050000 | -4.194805513  | 16.137299320 | 8.298868622  | 1 | 0 | 0 | ob |
| 1414 | 1 | 3 | -1.050000 | -3.570244487  | 15.044550680 | 10.366131378 | 1 | 0 | 0 | ob |
| 1415 | 1 | 3 | -1.050000 | -0.153510908  | 11.503260300 | 6.099420289  | 1 | 0 | 0 | ob |
| 1416 | 1 | 3 | -1.050000 | -3.569646655  | 11.686148519 | 10.365922068 | 1 | 0 | 0 | ob |
| 1417 | 1 | 3 | -1.050000 | -2.435167264  | 15.967653874 | 12.564346262 | 1 | 0 | 0 | ob |
| 1418 | 1 | 3 | -1.050000 | -0.981314655  | 16.140698519 | 10.365922068 | 1 | 0 | 0 | ob |
| 1419 | 1 | 3 | -1.050000 | -5.023517264  | 11.513103874 | 12.564346262 | 1 | 0 | 0 | ob |
| 1420 | 1 | 3 | -1.050000 | -2.434839092  | 10.769489700 | 12.565579711 | 1 | 0 | 0 | ob |
| 1421 | 1 | 4 | -0.950000 | -3.177442343  | 8.910040996  | 10.345082885 | 1 | 0 | 0 | oh |
| 1422 | 1 | 3 | -1.050000 | -0.509618349  | 8.913076970  | 12.393982417 | 1 | 0 | 0 | ob |
| 1423 | 1 | 4 | -0.950000 | -0.589092343  | 13.364590996 | 10.345082885 | 1 | 0 | 0 | oh |
| 1424 | 1 | 3 | -1.050000 | -3.097968349  | 13.367626970 | 12.393982417 | 1 | 0 | 0 | ob |
| 1425 | 1 | 4 | -0.950000 | -1.999257657  | 17.817259004 | 8.319917115  | 1 | 0 | 0 | oh |
| 1426 | 1 | 3 | -1.050000 | -4.667081651  | 17.814223030 | 6.271017583  | 1 | 0 | 0 | ob |
| 1427 | 1 | 4 | -0.950000 | -4.587607657  | 13.362709004 | 8.319917115  | 1 | 0 | 0 | oh |
| 1428 | 1 | 3 | -1.050000 | -2.078731651  | 13.359673030 | 6.271017583  | 1 | 0 | 0 | ob |
| 1429 | 1 | 3 | -1.050000 | -0.981894487  | 10.590000680 | 10.366131378 | 1 | 0 | 0 | ob |
| 1430 | 1 | 3 | -1.050000 | -5.023189092  | 15.224039700 | 12.565579711 | 1 | 0 | 0 | ob |
| 1431 | 1 | 3 | -1.050000 | -1.607035345  | 15.041151481 | 8.299077932  | 1 | 0 | 0 | ob |
| 1432 | 1 | 3 | -1.050000 | -2.741532736  | 10.759646126 | 6.100653738  | 1 | 0 | 0 | ob |
| 1433 | 1 | 5 | 2.100000  | -0.953702986  | 10.436219204 | 11.995277170 | 1 | 0 | 0 | st |
| 1434 | 1 | 5 | 2.100000  | -1.634672226  | 14.882470782 | 6.670701903  | 1 | 0 | 0 | st |
| 1435 | 1 | 5 | 2.100000  | -4.222997014  | 16.291080796 | 6.669722830  | 1 | 0 | 0 | st |



|      |   |   |           |              |               |              |   |   |   |   |    |
|------|---|---|-----------|--------------|---------------|--------------|---|---|---|---|----|
| 1436 | 1 | 5 | 2.100000  | -1.634647014 | 11.836530796  | 6.669722830  | 1 | 0 | 0 | # | st |
| 1437 | 1 | 5 | 2.100000  | -0.953677774 | 16.299379218  | 11.994298097 | 1 | 0 | 0 | # | st |
| 1438 | 1 | 5 | 2.100000  | -3.542027774 | 11.844829218  | 11.994298097 | 1 | 0 | 0 | # | st |
| 1439 | 1 | 5 | 2.100000  | -3.542052986 | 14.890769204  | 11.995277170 | 1 | 0 | 0 | # | st |
| 1440 | 1 | 5 | 2.100000  | -4.223022226 | 10.427920782  | 6.670701903  | 1 | 0 | 0 | # | st |
| 1441 | 1 | 1 | 1.575000  | 2.588555029  | -16.343538432 | 9.332770632  | 0 | 1 | 0 | # | ao |
| 1442 | 1 | 1 | 1.575000  | 0.000205029  | -11.888988432 | 9.332770632  | 0 | 1 | 0 | # | ao |
| 1443 | 1 | 1 | 1.575000  | 2.588144971  | -10.383761568 | 9.332229368  | 0 | 1 | 0 | # | ao |
| 1444 | 1 | 1 | 1.575000  | 5.176494971  | -14.838311568 | 9.332229368  | 0 | 1 | 0 | # | ao |
| 1445 | 1 | 2 | 0.425000  | 3.734650872  | -13.360932678 | 10.818615063 | 0 | 1 | 0 | # | ho |
| 1446 | 1 | 2 | 0.425000  | 1.146300872  | -17.815482678 | 10.818615063 | 0 | 1 | 0 | # | ho |
| 1447 | 1 | 2 | 0.425000  | 1.442049128  | -13.366367322 | 7.846384937  | 0 | 1 | 0 | # | ho |
| 1448 | 1 | 2 | 0.425000  | 4.030399128  | -8.911817322  | 7.846384937  | 0 | 1 | 0 | # | ho |
| 1449 | 1 | 3 | -1.050000 | 0.981314655  | -16.140698519 | 8.299077932  | 0 | 1 | 0 | # | ob |
| 1450 | 1 | 3 | -1.050000 | 5.023517264  | -11.513103874 | 6.100653738  | 0 | 1 | 0 | # | ob |
| 1451 | 1 | 3 | -1.050000 | 3.570244487  | -15.044550680 | 8.298868622  | 0 | 1 | 0 | # | ob |
| 1452 | 1 | 3 | -1.050000 | 2.434839092  | -10.769489700 | 6.099420289  | 0 | 1 | 0 | # | ob |
| 1453 | 1 | 3 | -1.050000 | 0.981894487  | -10.590000680 | 8.298868622  | 0 | 1 | 0 | # | ob |
| 1454 | 1 | 3 | -1.050000 | 1.606455513  | -11.682749320 | 10.366131378 | 0 | 1 | 0 | # | ob |
| 1455 | 1 | 3 | -1.050000 | 5.023189092  | -15.224039700 | 6.099420289  | 0 | 1 | 0 | # | ob |
| 1456 | 1 | 3 | -1.050000 | 1.607035345  | -15.041151481 | 10.365922068 | 0 | 1 | 0 | # | ob |
| 1457 | 1 | 3 | -1.050000 | 2.741532736  | -10.759646126 | 12.564346262 | 0 | 1 | 0 | # | ob |
| 1458 | 1 | 3 | -1.050000 | 4.195385345  | -10.586601481 | 10.365922068 | 0 | 1 | 0 | # | ob |
| 1459 | 1 | 3 | -1.050000 | 0.153182736  | -15.214196126 | 12.564346262 | 0 | 1 | 0 | # | ob |
| 1460 | 1 | 3 | -1.050000 | 2.741860908  | -15.957810300 | 12.565579711 | 0 | 1 | 0 | # | ob |
| 1461 | 1 | 4 | -0.950000 | 1.999257657  | -17.817259004 | 10.345082885 | 0 | 1 | 0 | # | oh |
| 1462 | 1 | 3 | -1.050000 | 4.667801651  | -17.814223030 | 12.393982417 | 0 | 1 | 0 | # | ob |
| 1463 | 1 | 4 | -0.950000 | 4.587607657  | -13.362709004 | 10.345082885 | 0 | 1 | 0 | # | oh |
| 1464 | 1 | 3 | -1.050000 | 2.078731651  | -13.359673030 | 12.393982417 | 0 | 1 | 0 | # | ob |
| 1465 | 1 | 4 | -0.950000 | 3.177442343  | -8.910040996  | 8.319917115  | 0 | 1 | 0 | # | oh |
| 1466 | 1 | 3 | -1.050000 | 0.509618349  | -8.913076970  | 6.271017583  | 0 | 1 | 0 | # | ob |
| 1467 | 1 | 4 | -0.950000 | 0.589092343  | -13.364590996 | 8.319917115  | 0 | 1 | 0 | # | oh |
| 1468 | 1 | 3 | -1.050000 | 3.097968349  | -13.367626970 | 6.271017583  | 0 | 1 | 0 | # | ob |
| 1469 | 1 | 3 | -1.050000 | 4.194805513  | -16.137299320 | 10.366131378 | 0 | 1 | 0 | # | ob |
| 1470 | 1 | 3 | -1.050000 | 0.153510908  | -11.503260300 | 12.565579711 | 0 | 1 | 0 | # | ob |
| 1471 | 1 | 3 | -1.050000 | 3.569664655  | -11.686148519 | 8.299077932  | 0 | 1 | 0 | # | ob |
| 1472 | 1 | 3 | -1.050000 | 2.435167264  | -15.967653874 | 6.100653738  | 0 | 1 | 0 | # | ob |
| 1473 | 1 | 5 | 2.100000  | 4.222997014  | -16.291080796 | 11.995277170 | 0 | 1 | 0 | # | st |
| 1474 | 1 | 5 | 2.100000  | 3.542027774  | -11.844829218 | 6.670701903  | 0 | 1 | 0 | # | st |
| 1475 | 1 | 5 | 2.100000  | 0.953702986  | -10.436219204 | 6.669722830  | 0 | 1 | 0 | # | st |
| 1476 | 1 | 5 | 2.100000  | 3.542052986  | -14.890769204 | 6.669722830  | 0 | 1 | 0 | # | st |
| 1477 | 1 | 5 | 2.100000  | 4.223022226  | -10.427920782 | 11.994298097 | 0 | 1 | 0 | # | st |
| 1478 | 1 | 5 | 2.100000  | 1.634672226  | -14.882470782 | 11.994298097 | 0 | 1 | 0 | # | st |
| 1479 | 1 | 5 | 2.100000  | 1.634647014  | -11.836530796 | 11.995277170 | 0 | 1 | 0 | # | st |
| 1480 | 1 | 5 | 2.100000  | 0.953677774  | -16.299379218 | 6.670701903  | 0 | 1 | 0 | # | st |
| 1481 | 1 | 1 | 1.575000  | 7.765255029  | -16.343538432 | 9.332770632  | 0 | 1 | 0 | # | ao |
| 1482 | 1 | 1 | 1.575000  | 5.176905029  | -11.888988432 | 9.332770632  | 0 | 1 | 0 | # | ao |
| 1483 | 1 | 1 | 1.575000  | 7.764844971  | -10.383761568 | 9.332229368  | 0 | 1 | 0 | # | ao |
| 1484 | 1 | 1 | 1.575000  | 10.353194971 | -14.838311568 | 9.332229368  | 0 | 1 | 0 | # | ao |
| 1485 | 1 | 2 | 0.425000  | 8.911350872  | -13.360932678 | 10.818615063 | 0 | 1 | 0 | # | ho |
| 1486 | 1 | 2 | 0.425000  | 6.323000872  | -17.815482678 | 10.818615063 | 0 | 1 | 0 | # | ho |
| 1487 | 1 | 2 | 0.425000  | 6.618749128  | -13.366367322 | 7.846384937  | 0 | 1 | 0 | # | ho |
| 1488 | 1 | 2 | 0.425000  | 9.207099128  | -8.911817322  | 7.846384937  | 0 | 1 | 0 | # | ho |
| 1489 | 1 | 3 | -1.050000 | 6.158014655  | -16.140698519 | 8.299077932  | 0 | 1 | 0 | # | ob |
| 1490 | 1 | 3 | -1.050000 | 10.200217264 | -11.513103874 | 6.100653738  | 0 | 1 | 0 | # | ob |
| 1491 | 1 | 3 | -1.050000 | 8.746944487  | -15.044550680 | 8.298868622  | 0 | 1 | 0 | # | ob |
| 1492 | 1 | 3 | -1.050000 | 7.611539092  | -10.769489700 | 6.099420289  | 0 | 1 | 0 | # | ob |
| 1493 | 1 | 3 | -1.050000 | 6.158594487  | -10.590000680 | 8.298868622  | 0 | 1 | 0 | # | ob |
| 1494 | 1 | 3 | -1.050000 | 6.783155513  | -11.682749320 | 10.366131378 | 0 | 1 | 0 | # | ob |
| 1495 | 1 | 3 | -1.050000 | 10.199889092 | -15.224039700 | 6.099420289  | 0 | 1 | 0 | # | ob |
| 1496 | 1 | 3 | -1.050000 | 6.783735345  | -15.041151481 | 10.365922068 | 0 | 1 | 0 | # | ob |
| 1497 | 1 | 3 | -1.050000 | 7.918232736  | -10.759646126 | 12.564346262 | 0 | 1 | 0 | # | ob |
| 1498 | 1 | 3 | -1.050000 | 9.372085345  | -10.586601481 | 10.365922068 | 0 | 1 | 0 | # | ob |
| 1499 | 1 | 3 | -1.050000 | 5.329882736  | -15.214196126 | 12.564346262 | 0 | 1 | 0 | # | ob |
| 1500 | 1 | 3 | -1.050000 | 7.918560908  | -15.957810300 | 12.565579711 | 0 | 1 | 0 | # | ob |
| 1501 | 1 | 4 | -0.950000 | 7.175957657  | -17.817259004 | 10.345082885 | 0 | 1 | 0 | # | oh |
| 1502 | 1 | 3 | -1.050000 | 9.843781651  | -17.814223030 | 12.393982417 | 0 | 1 | 0 | # | ob |
| 1503 | 1 | 4 | -0.950000 | 9.764307657  | -13.362709004 | 10.345082885 | 0 | 1 | 0 | # | oh |
| 1504 | 1 | 3 | -1.050000 | 7.255431651  | -13.359673030 | 12.393982417 | 0 | 1 | 0 | # | ob |
| 1505 | 1 | 4 | -0.950000 | 8.354142343  | -8.910040996  | 8.319917115  | 0 | 1 | 0 | # | oh |
| 1506 | 1 | 3 | -1.050000 | 5.686318349  | -8.913076970  | 6.271017583  | 0 | 1 | 0 | # | ob |
| 1507 | 1 | 4 | -0.950000 | 5.765792343  | -13.364590996 | 8.319917115  | 0 | 1 | 0 | # | oh |
| 1508 | 1 | 3 | -1.050000 | 8.274668349  | -13.367626970 | 6.271017583  | 0 | 1 | 0 | # | ob |
| 1509 | 1 | 3 | -1.050000 | 9.371505513  | -16.137299320 | 10.366131378 | 0 | 1 | 0 | # | ob |
| 1510 | 1 | 3 | -1.050000 | 5.330210908  | -11.503260300 | 12.565579711 | 0 | 1 | 0 | # | ob |
| 1511 | 1 | 3 | -1.050000 | 8.746364655  | -11.686148519 | 8.299077932  | 0 | 1 | 0 | # | ob |
| 1512 | 1 | 3 | -1.050000 | 7.611867264  | -15.967653874 | 6.100653738  | 0 | 1 | 0 | # | ob |
| 1513 | 1 | 5 | 2.100000  | 9.399697014  | -16.291080796 | 11.995277170 | 0 | 1 | 0 | # | st |
| 1514 | 1 | 5 | 2.100000  | 8.718727774  | -11.844829218 | 6.670701903  | 0 | 1 | 0 | # | st |
| 1515 | 1 | 5 | 2.100000  | 6.130402986  | -10.436219204 | 6.669722830  | 0 | 1 | 0 | # | st |
| 1516 | 1 | 5 | 2.100000  | 8.718752986  | -14.890769204 | 6.669722830  | 0 | 1 | 0 | # | st |
| 1517 | 1 | 5 | 2.100000  | 9.399722226  | -10.427920782 | 11.994298097 | 0 | 1 | 0 | # | st |
| 1518 | 1 | 5 | 2.100000  | 6.811372226  | -14.882470782 | 11.994298097 | 0 | 1 | 0 | # | st |
| 1519 | 1 | 5 | 2.100000  | 6.811347014  | -11.836530796 | 11.995277170 | 0 | 1 | 0 | # | st |
| 1520 | 1 | 5 | 2.100000  | 6.130377774  | -16.299379218 | 6.670701903  | 0 | 1 | 0 | # | st |
| 1521 | 1 | 1 | 1.575000  | 12.941955029 | -16.343538432 | 9.332770632  | 0 | 1 | 0 | # | ao |
| 1522 | 1 | 1 | 1.575000  | 10.353605029 | -11.888988432 | 9.332770632  | 0 | 1 | 0 | # | ao |
| 1523 | 1 | 1 | 1.575000  | 12.941544971 | -10.383761568 | 9.332229368  | 0 | 1 | 0 | # | ao |
| 1524 | 1 | 1 | 1.575000  | 15.529894971 | -14.838311568 | 9.332229368  | 0 | 1 | 0 | # | ao |
| 1525 | 1 | 2 | 0.425000  | 14.088050872 | -13.360932678 | 10.818615063 | 0 | 1 | 0 | # | ho |
| 1526 | 1 | 2 | 0.425000  | 11.499700872 | -17.815482678 | 10.818615063 | 0 | 1 | 0 | # | ho |
| 1527 | 1 | 2 | 0.425000  | 11.795449128 | -13.366367322 | 7.846384937  | 0 | 1 | 0 | # | ho |
| 1528 | 1 | 2 | 0.425000  | 14.383799128 | -8.911817322  | 7.846384937  | 0 | 1 | 0 | # | ho |

|      |   |   |           |               |               |              |   |   |   |   |    |
|------|---|---|-----------|---------------|---------------|--------------|---|---|---|---|----|
| 1529 | 1 | 3 | -1.050000 | 11.334714655  | -16.140698519 | 8.299077932  | 0 | 1 | 0 | # | ob |
| 1530 | 1 | 3 | -1.050000 | 15.376917264  | -11.513103874 | 6.100653738  | 0 | 1 | 0 | # | ob |
| 1531 | 1 | 3 | -1.050000 | 13.923644487  | -15.044550680 | 8.298868622  | 0 | 1 | 0 | # | ob |
| 1532 | 1 | 3 | -1.050000 | 12.788239092  | -10.769489700 | 6.099420289  | 0 | 1 | 0 | # | ob |
| 1533 | 1 | 3 | -1.050000 | 11.335294487  | -10.590000680 | 8.298868622  | 0 | 1 | 0 | # | ob |
| 1534 | 1 | 3 | -1.050000 | 11.959855513  | -11.682749320 | 10.366131378 | 0 | 1 | 0 | # | ob |
| 1535 | 1 | 3 | -1.050000 | 15.376589092  | -15.224039700 | 6.099420289  | 0 | 1 | 0 | # | ob |
| 1536 | 1 | 3 | -1.050000 | 11.960435345  | -15.041151481 | 10.365922068 | 0 | 1 | 0 | # | ob |
| 1537 | 1 | 3 | -1.050000 | 13.094932736  | -10.759646126 | 12.564346262 | 0 | 1 | 0 | # | ob |
| 1538 | 1 | 3 | -1.050000 | 14.548785345  | -10.586601481 | 10.365922068 | 0 | 1 | 0 | # | ob |
| 1539 | 1 | 3 | -1.050000 | 10.506582736  | -15.214196126 | 12.564346262 | 0 | 1 | 0 | # | ob |
| 1540 | 1 | 3 | -1.050000 | 13.095260908  | -15.957810300 | 12.565579711 | 0 | 1 | 0 | # | ob |
| 1541 | 1 | 4 | -0.950000 | 12.352657657  | -17.817259004 | 10.345082885 | 0 | 1 | 0 | # | oh |
| 1542 | 1 | 3 | -1.050000 | 15.020481651  | -17.814223030 | 12.393982417 | 0 | 1 | 0 | # | ob |
| 1543 | 1 | 4 | -0.950000 | 14.941007657  | -13.362709004 | 10.345082885 | 0 | 1 | 0 | # | oh |
| 1544 | 1 | 3 | -1.050000 | 12.432131651  | -13.359673030 | 12.393982417 | 0 | 1 | 0 | # | ob |
| 1545 | 1 | 4 | -0.950000 | 13.530842343  | -8.910040996  | 8.319917115  | 0 | 1 | 0 | # | oh |
| 1546 | 1 | 3 | -1.050000 | 10.863018349  | -8.913076970  | 6.271017583  | 0 | 1 | 0 | # | ob |
| 1547 | 1 | 4 | -0.950000 | 10.942492343  | -13.364590996 | 8.319917115  | 0 | 1 | 0 | # | oh |
| 1548 | 1 | 3 | -1.050000 | 13.451368349  | -13.367626970 | 6.271017583  | 0 | 1 | 0 | # | ob |
| 1549 | 1 | 3 | -1.050000 | 14.548205513  | -16.137299320 | 10.366131378 | 0 | 1 | 0 | # | ob |
| 1550 | 1 | 3 | -1.050000 | 10.506910908  | -11.503260300 | 12.565579711 | 0 | 1 | 0 | # | ob |
| 1551 | 1 | 3 | -1.050000 | 13.923064655  | -11.686148519 | 8.299077932  | 0 | 1 | 0 | # | ob |
| 1552 | 1 | 3 | -1.050000 | 12.788567264  | -15.967653874 | 6.100653738  | 0 | 1 | 0 | # | ob |
| 1553 | 1 | 5 | 2.100000  | 14.576397014  | -16.291080796 | 11.995277170 | 0 | 1 | 0 | # | st |
| 1554 | 1 | 5 | 2.100000  | 13.895427774  | -11.844829218 | 6.670701903  | 0 | 1 | 0 | # | st |
| 1555 | 1 | 5 | 2.100000  | 11.307102986  | -10.436219204 | 6.669722830  | 0 | 1 | 0 | # | st |
| 1556 | 1 | 5 | 2.100000  | 13.895452986  | -14.890769204 | 6.669722830  | 0 | 1 | 0 | # | st |
| 1557 | 1 | 5 | 2.100000  | 14.576422226  | -10.427920782 | 11.994298097 | 0 | 1 | 0 | # | st |
| 1558 | 1 | 5 | 2.100000  | 11.988072226  | -14.882470782 | 11.994298097 | 0 | 1 | 0 | # | st |
| 1559 | 1 | 5 | 2.100000  | 11.988047014  | -11.836530796 | 11.995277170 | 0 | 1 | 0 | # | st |
| 1560 | 1 | 5 | 2.100000  | 11.307077774  | -16.299379218 | 6.670701903  | 0 | 1 | 0 | # | st |
| 1561 | 1 | 1 | 1.575000  | -12.941544971 | -16.343538432 | 9.332770632  | 1 | 1 | 0 | # | ao |
| 1562 | 1 | 1 | 1.575000  | -15.529894971 | -11.888988432 | 9.332770632  | 1 | 1 | 0 | # | ao |
| 1563 | 1 | 1 | 1.575000  | -12.941955029 | -10.383761568 | 9.332229368  | 1 | 1 | 0 | # | ao |
| 1564 | 1 | 1 | 1.575000  | -10.353605029 | -14.838311568 | 9.332229368  | 1 | 1 | 0 | # | ao |
| 1565 | 1 | 2 | 0.425000  | -11.795449128 | -13.360932678 | 10.818615063 | 1 | 1 | 0 | # | ho |
| 1566 | 1 | 2 | 0.425000  | -14.383799128 | -17.815482678 | 10.818615063 | 1 | 1 | 0 | # | ho |
| 1567 | 1 | 2 | 0.425000  | -14.088050872 | -13.366367322 | 7.846384937  | 1 | 1 | 0 | # | ho |
| 1568 | 1 | 2 | 0.425000  | -11.499700872 | -8.911817322  | 7.846384937  | 1 | 1 | 0 | # | ho |
| 1569 | 1 | 3 | -1.050000 | -14.548785345 | -16.140698519 | 8.299077932  | 1 | 1 | 0 | # | ob |
| 1570 | 1 | 3 | -1.050000 | -10.506582736 | -11.513103874 | 6.100653738  | 1 | 1 | 0 | # | ob |
| 1571 | 1 | 3 | -1.050000 | -11.959855513 | -15.044550680 | 8.298868622  | 1 | 1 | 0 | # | ob |
| 1572 | 1 | 3 | -1.050000 | -13.095260908 | -10.769489700 | 6.099420289  | 1 | 1 | 0 | # | ob |
| 1573 | 1 | 3 | -1.050000 | -14.548205513 | -10.590000680 | 8.298868622  | 1 | 1 | 0 | # | ob |
| 1574 | 1 | 3 | -1.050000 | -13.923644487 | -11.682749320 | 10.366131378 | 1 | 1 | 0 | # | ob |
| 1575 | 1 | 3 | -1.050000 | -10.506910908 | -15.224039700 | 6.099420289  | 1 | 1 | 0 | # | ob |
| 1576 | 1 | 3 | -1.050000 | -13.923064655 | -15.041151481 | 10.365922068 | 1 | 1 | 0 | # | ob |
| 1577 | 1 | 3 | -1.050000 | -12.788567264 | -10.759646126 | 12.564346262 | 1 | 1 | 0 | # | ob |
| 1578 | 1 | 3 | -1.050000 | -11.334714655 | -10.586601481 | 10.365922068 | 1 | 1 | 0 | # | ob |
| 1579 | 1 | 3 | -1.050000 | -15.376917264 | -15.214196126 | 12.564346262 | 1 | 1 | 0 | # | ob |
| 1580 | 1 | 3 | -1.050000 | -12.788239092 | -15.957810300 | 12.565579711 | 1 | 1 | 0 | # | ob |
| 1581 | 1 | 4 | -0.950000 | -13.530842343 | -17.817259004 | 10.345082885 | 1 | 1 | 0 | # | oh |
| 1582 | 1 | 3 | -1.050000 | -10.863018349 | -17.814223030 | 12.393982417 | 1 | 1 | 0 | # | ob |
| 1583 | 1 | 4 | -0.950000 | -10.942492343 | -13.362709004 | 10.345082885 | 1 | 1 | 0 | # | oh |
| 1584 | 1 | 3 | -1.050000 | -13.451368349 | -13.359673030 | 12.393982417 | 1 | 1 | 0 | # | ob |
| 1585 | 1 | 4 | -0.950000 | -12.352657657 | -8.910040996  | 8.319917115  | 1 | 1 | 0 | # | oh |
| 1586 | 1 | 3 | -1.050000 | -15.020481651 | -8.913076970  | 6.271017583  | 1 | 1 | 0 | # | ob |
| 1587 | 1 | 4 | -0.950000 | -14.941007657 | -13.364590996 | 8.319917115  | 1 | 1 | 0 | # | oh |
| 1588 | 1 | 3 | -1.050000 | -12.432131651 | -13.367626970 | 6.271017583  | 1 | 1 | 0 | # | ob |
| 1589 | 1 | 3 | -1.050000 | -11.335294487 | -16.137299320 | 10.366131378 | 1 | 1 | 0 | # | ob |
| 1590 | 1 | 3 | -1.050000 | -15.376589092 | -11.503260300 | 12.565579711 | 1 | 1 | 0 | # | ob |
| 1591 | 1 | 3 | -1.050000 | -11.960435345 | -11.686148519 | 8.299077932  | 1 | 1 | 0 | # | ob |
| 1592 | 1 | 3 | -1.050000 | -13.094932736 | -15.967653874 | 6.100653738  | 1 | 1 | 0 | # | ob |
| 1593 | 1 | 5 | 2.100000  | -11.307102986 | -16.291080796 | 11.995277170 | 1 | 1 | 0 | # | st |
| 1594 | 1 | 5 | 2.100000  | -11.988072226 | -11.844829218 | 6.670701903  | 1 | 1 | 0 | # | st |
| 1595 | 1 | 5 | 2.100000  | -14.576397014 | -10.436219204 | 6.669722830  | 1 | 1 | 0 | # | st |
| 1596 | 1 | 5 | 2.100000  | -11.988047014 | -14.890769204 | 6.669722830  | 1 | 1 | 0 | # | st |
| 1597 | 1 | 5 | 2.100000  | -11.307077774 | -10.427920782 | 11.994298097 | 1 | 1 | 0 | # | st |
| 1598 | 1 | 5 | 2.100000  | -13.895427774 | -14.882470782 | 11.994298097 | 1 | 1 | 0 | # | st |
| 1599 | 1 | 5 | 2.100000  | -13.895452986 | -11.836530796 | 11.995277170 | 1 | 1 | 0 | # | st |
| 1600 | 1 | 5 | 2.100000  | -14.576422226 | -16.299379218 | 6.670701903  | 1 | 1 | 0 | # | st |
| 1601 | 1 | 1 | 1.575000  | -7.764844971  | -16.343538432 | 9.332770632  | 1 | 1 | 0 | # | ao |
| 1602 | 1 | 1 | 1.575000  | -10.353194971 | -11.888988432 | 9.332770632  | 1 | 1 | 0 | # | ao |
| 1603 | 1 | 1 | 1.575000  | -7.765255029  | -10.383761568 | 9.332229368  | 1 | 1 | 0 | # | ao |
| 1604 | 1 | 1 | 1.575000  | -5.176905029  | -14.838311568 | 9.332229368  | 1 | 1 | 0 | # | ao |
| 1605 | 1 | 2 | 0.425000  | -6.618749128  | -13.360932678 | 10.818615063 | 1 | 1 | 0 | # | ho |
| 1606 | 1 | 2 | 0.425000  | -9.207099128  | -17.815482678 | 10.818615063 | 1 | 1 | 0 | # | ho |
| 1607 | 1 | 2 | 0.425000  | -8.911350872  | -13.366367322 | 7.846384937  | 1 | 1 | 0 | # | ho |
| 1608 | 1 | 2 | 0.425000  | -6.323000872  | -8.911817322  | 7.846384937  | 1 | 1 | 0 | # | ho |
| 1609 | 1 | 3 | -1.050000 | -9.372085345  | -16.140698519 | 8.299077932  | 1 | 1 | 0 | # | ob |
| 1610 | 1 | 3 | -1.050000 | -5.329882736  | -11.513103874 | 6.100653738  | 1 | 1 | 0 | # | ob |
| 1611 | 1 | 3 | -1.050000 | -6.783155513  | -15.044550680 | 8.298868622  | 1 | 1 | 0 | # | ob |
| 1612 | 1 | 3 | -1.050000 | -7.918560908  | -10.769489700 | 6.099420289  | 1 | 1 | 0 | # | ob |
| 1613 | 1 | 3 | -1.050000 | -9.371505513  | -10.590000680 | 8.298868622  | 1 | 1 | 0 | # | ob |
| 1614 | 1 | 3 | -1.050000 | -8.746944487  | -11.682749320 | 10.366131378 | 1 | 1 | 0 | # | ob |
| 1615 | 1 | 3 | -1.050000 | -5.330210908  | -15.224039700 | 6.099420289  | 1 | 1 | 0 | # | ob |
| 1616 | 1 | 3 | -1.050000 | -8.746346455  | -15.041151481 | 10.365922068 | 1 | 1 | 0 | # | ob |
| 1617 | 1 | 3 | -1.050000 | -7.611867264  | -10.759646126 | 12.564346262 | 1 | 1 | 0 | # | ob |
| 1618 | 1 | 3 | -1.050000 | -6.158014655  | -10.586601481 | 10.365922068 | 1 | 1 | 0 | # | ob |
| 1619 | 1 | 3 | -1.050000 | -10.200217264 | -15.214196126 | 12.564346262 | 1 | 1 | 0 | # | ob |
| 1620 | 1 | 3 | -1.050000 | -7.611539092  | -15.957810300 | 12.565579711 | 1 | 1 | 0 | # | ob |
| 1621 | 1 | 4 | -0.950000 | -8.354142343  | -17.817259004 | 10.345082885 | 1 | 1 | 0 | # | oh |

|      |   |   |           |               |               |              |   |   |   |   |    |
|------|---|---|-----------|---------------|---------------|--------------|---|---|---|---|----|
| 1622 | 1 | 3 | -1.050000 | -5.686318349  | -17.814223030 | 12.393982417 | 1 | 1 | 0 | # | ob |
| 1623 | 1 | 4 | -0.950000 | -5.765792343  | -13.362709004 | 10.345082885 | 1 | 1 | 0 | # | oh |
| 1624 | 1 | 3 | -1.050000 | -8.274668349  | -13.359673030 | 12.393982417 | 1 | 1 | 0 | # | ob |
| 1625 | 1 | 4 | -0.950000 | -7.175957657  | -8.910040996  | 8.319917115  | 1 | 1 | 0 | # | oh |
| 1626 | 1 | 3 | -1.050000 | -9.843781651  | -8.913076970  | 6.271017583  | 1 | 1 | 0 | # | ob |
| 1627 | 1 | 4 | -0.950000 | -9.764307657  | -13.364590996 | 8.319917115  | 1 | 1 | 0 | # | oh |
| 1628 | 1 | 3 | -1.050000 | -7.255431651  | -13.367626970 | 6.271017583  | 1 | 1 | 0 | # | ob |
| 1629 | 1 | 3 | -1.050000 | -6.158594487  | -16.137299320 | 10.366131378 | 1 | 1 | 0 | # | ob |
| 1630 | 1 | 3 | -1.050000 | -10.199889092 | -11.503260300 | 12.565579711 | 1 | 1 | 0 | # | ob |
| 1631 | 1 | 3 | -1.050000 | -6.783735345  | -11.686148519 | 8.299077932  | 1 | 1 | 0 | # | ob |
| 1632 | 1 | 3 | -1.050000 | -7.918232736  | -15.967653874 | 6.100653738  | 1 | 1 | 0 | # | ob |
| 1633 | 1 | 5 | 2.100000  | -6.130402986  | -16.291080796 | 11.995277170 | 1 | 1 | 0 | # | st |
| 1634 | 1 | 5 | 2.100000  | -6.811372226  | -11.844829218 | 6.670701903  | 1 | 1 | 0 | # | st |
| 1635 | 1 | 5 | 2.100000  | -9.399697014  | -10.436219204 | 6.669722830  | 1 | 1 | 0 | # | st |
| 1636 | 1 | 5 | 2.100000  | -6.811347014  | -14.890769204 | 6.669722830  | 1 | 1 | 0 | # | st |
| 1637 | 1 | 5 | 2.100000  | -6.130377774  | -10.427920782 | 11.994298097 | 1 | 1 | 0 | # | st |
| 1638 | 1 | 5 | 2.100000  | -8.718727774  | -14.882470782 | 11.994298097 | 1 | 1 | 0 | # | st |
| 1639 | 1 | 5 | 2.100000  | -8.718752986  | -11.836530796 | 11.995277170 | 1 | 1 | 0 | # | st |
| 1640 | 1 | 5 | 2.100000  | -9.399722226  | -16.299379218 | 6.670701903  | 1 | 1 | 0 | # | st |
| 1641 | 1 | 1 | 1.575000  | -2.588144971  | -16.343538432 | 9.332770632  | 1 | 1 | 0 | # | ao |
| 1642 | 1 | 1 | 1.575000  | -5.176494971  | -11.888988432 | 9.332770632  | 1 | 1 | 0 | # | ao |
| 1643 | 1 | 1 | 1.575000  | -2.588555029  | -10.383761568 | 9.332229368  | 1 | 1 | 0 | # | ao |
| 1644 | 1 | 1 | 1.575000  | -0.000205029  | -14.838311568 | 9.332229368  | 1 | 1 | 0 | # | ao |
| 1645 | 1 | 2 | 0.425000  | -1.442049128  | -13.360932678 | 10.818615063 | 1 | 1 | 0 | # | ho |
| 1646 | 1 | 2 | 0.425000  | -4.030399128  | -17.815482678 | 10.818615063 | 1 | 1 | 0 | # | ho |
| 1647 | 1 | 2 | 0.425000  | -3.734650872  | -13.366367322 | 7.846384937  | 1 | 1 | 0 | # | ho |
| 1648 | 1 | 2 | 0.425000  | -1.146300872  | -8.911817322  | 7.846384937  | 1 | 1 | 0 | # | ho |
| 1649 | 1 | 3 | -1.050000 | -4.195385345  | -16.140698519 | 8.299077932  | 1 | 1 | 0 | # | ob |
| 1650 | 1 | 3 | -1.050000 | -0.153182736  | -11.513103874 | 6.100653738  | 1 | 1 | 0 | # | ob |
| 1651 | 1 | 3 | -1.050000 | -1.606455513  | -15.044550680 | 8.298868622  | 1 | 1 | 0 | # | ob |
| 1652 | 1 | 3 | -1.050000 | -2.741860908  | -10.769489700 | 6.099420289  | 1 | 1 | 0 | # | ob |
| 1653 | 1 | 3 | -1.050000 | -4.194805513  | -10.590000680 | 8.298868622  | 1 | 1 | 0 | # | ob |
| 1654 | 1 | 3 | -1.050000 | -3.570244487  | -11.682749320 | 10.366131378 | 1 | 1 | 0 | # | ob |
| 1655 | 1 | 3 | -1.050000 | -0.153510908  | -15.224039700 | 6.099420289  | 1 | 1 | 0 | # | ob |
| 1656 | 1 | 3 | -1.050000 | -3.569664655  | -15.041151481 | 10.365922068 | 1 | 1 | 0 | # | ob |
| 1657 | 1 | 3 | -1.050000 | -2.435167264  | -10.759646126 | 12.564346262 | 1 | 1 | 0 | # | ob |
| 1658 | 1 | 3 | -1.050000 | -0.981314655  | -10.586601481 | 10.365922068 | 1 | 1 | 0 | # | ob |
| 1659 | 1 | 3 | -1.050000 | -5.023517264  | -15.214196126 | 12.564346262 | 1 | 1 | 0 | # | ob |
| 1660 | 1 | 3 | -1.050000 | -2.434839092  | -15.957810300 | 12.565579711 | 1 | 1 | 0 | # | ob |
| 1661 | 1 | 4 | -0.950000 | -3.177442343  | -17.817259004 | 10.345082885 | 1 | 1 | 0 | # | oh |
| 1662 | 1 | 3 | -1.050000 | -0.509618349  | -17.814223030 | 12.393982417 | 1 | 1 | 0 | # | ob |
| 1663 | 1 | 4 | -0.950000 | -0.589092343  | -13.362709004 | 10.345082885 | 1 | 1 | 0 | # | oh |
| 1664 | 1 | 3 | -1.050000 | -3.097968349  | -13.359673030 | 12.393982417 | 1 | 1 | 0 | # | ob |
| 1665 | 1 | 4 | -0.950000 | -1.999257657  | -8.910040996  | 8.319917115  | 1 | 1 | 0 | # | oh |
| 1666 | 1 | 3 | -1.050000 | -4.667081651  | -8.913076970  | 6.271017583  | 1 | 1 | 0 | # | ob |
| 1667 | 1 | 4 | -0.950000 | -4.587607657  | -13.364590996 | 8.319917115  | 1 | 1 | 0 | # | oh |
| 1668 | 1 | 3 | -1.050000 | -2.078731651  | -13.367626970 | 6.271017583  | 1 | 1 | 0 | # | ob |
| 1669 | 1 | 3 | -1.050000 | -0.981894487  | -16.137299320 | 10.366131378 | 1 | 1 | 0 | # | ob |
| 1670 | 1 | 3 | -1.050000 | -5.023189092  | -11.503260300 | 12.565579711 | 1 | 1 | 0 | # | ob |
| 1671 | 1 | 3 | -1.050000 | -1.607035345  | -11.686148519 | 8.299077932  | 1 | 1 | 0 | # | ob |
| 1672 | 1 | 3 | -1.050000 | -2.741532736  | -15.967653874 | 6.100653738  | 1 | 1 | 0 | # | ob |
| 1673 | 1 | 5 | 2.100000  | -0.953702986  | -16.291080796 | 11.995277170 | 1 | 1 | 0 | # | st |
| 1674 | 1 | 5 | 2.100000  | -1.634672226  | -11.844829218 | 6.670701903  | 1 | 1 | 0 | # | st |
| 1675 | 1 | 5 | 2.100000  | -4.222997014  | -10.436219204 | 6.669722830  | 1 | 1 | 0 | # | st |
| 1676 | 1 | 5 | 2.100000  | -1.634647014  | -14.890769204 | 6.669722830  | 1 | 1 | 0 | # | st |
| 1677 | 1 | 5 | 2.100000  | -0.953677774  | -10.427920782 | 11.994298097 | 1 | 1 | 0 | # | st |
| 1678 | 1 | 5 | 2.100000  | -3.542027774  | -14.882470782 | 11.994298097 | 1 | 1 | 0 | # | st |
| 1679 | 1 | 5 | 2.100000  | -3.542052986  | -11.836530796 | 11.995277170 | 1 | 1 | 0 | # | st |
| 1680 | 1 | 5 | 2.100000  | -4.223022226  | -16.299379218 | 6.670701903  | 1 | 1 | 0 | # | st |
| 1681 | 1 | 1 | 1.575000  | 2.588555029   | -7.434438432  | 9.332770632  | 0 | 1 | 0 | # | ao |
| 1682 | 1 | 1 | 1.575000  | 0.000205029   | -2.979888432  | 9.332770632  | 0 | 1 | 0 | # | ao |
| 1683 | 1 | 1 | 1.575000  | 2.588144971   | -1.474661568  | 9.332229368  | 0 | 1 | 0 | # | ao |
| 1684 | 1 | 1 | 1.575000  | 5.176494971   | -5.929211568  | 9.332229368  | 0 | 1 | 0 | # | ao |
| 1685 | 1 | 2 | 0.425000  | 3.734650872   | -4.451832678  | 10.818615063 | 0 | 1 | 0 | # | ho |
| 1686 | 1 | 2 | 0.425000  | 1.146300872   | -8.906382678  | 10.818615063 | 0 | 1 | 0 | # | ho |
| 1687 | 1 | 2 | 0.425000  | 1.442049128   | -4.457267322  | 7.846384937  | 0 | 1 | 0 | # | ho |
| 1688 | 1 | 2 | 0.425000  | 4.030399128   | -0.002717322  | 7.846384937  | 0 | 1 | 0 | # | ho |
| 1689 | 1 | 3 | -1.050000 | 0.981314655   | -7.231598519  | 8.299077932  | 0 | 1 | 0 | # | ob |
| 1690 | 1 | 3 | -1.050000 | 5.023517264   | -2.604003874  | 6.100653738  | 0 | 1 | 0 | # | ob |
| 1691 | 1 | 3 | -1.050000 | 3.570244487   | -6.135450680  | 8.298868622  | 0 | 1 | 0 | # | ob |
| 1692 | 1 | 3 | -1.050000 | 2.434839092   | -1.860389700  | 6.099420289  | 0 | 1 | 0 | # | ob |
| 1693 | 1 | 3 | -1.050000 | 0.981894487   | -1.680900680  | 8.298868622  | 0 | 1 | 0 | # | ob |
| 1694 | 1 | 3 | -1.050000 | 1.606455513   | -2.773649320  | 10.366131378 | 0 | 1 | 0 | # | ob |
| 1695 | 1 | 3 | -1.050000 | 5.023189092   | -6.314939700  | 6.099420289  | 0 | 1 | 0 | # | ob |
| 1696 | 1 | 3 | -1.050000 | 1.607035345   | -6.132051481  | 10.365922068 | 0 | 1 | 0 | # | ob |
| 1697 | 1 | 3 | -1.050000 | 2.741532736   | -1.850546126  | 12.564346262 | 0 | 1 | 0 | # | ob |
| 1698 | 1 | 3 | -1.050000 | 4.195385345   | -1.677501481  | 10.365922068 | 0 | 1 | 0 | # | ob |
| 1699 | 1 | 3 | -1.050000 | 0.153182736   | -6.305096126  | 12.564346262 | 0 | 1 | 0 | # | ob |
| 1700 | 1 | 3 | -1.050000 | 2.741860908   | -7.048710300  | 12.565579711 | 0 | 1 | 0 | # | ob |
| 1701 | 1 | 4 | -0.950000 | 1.999257657   | -8.908159004  | 10.345082885 | 0 | 1 | 0 | # | oh |
| 1702 | 1 | 3 | -1.050000 | 4.667081651   | -8.905123030  | 12.393982417 | 0 | 1 | 0 | # | ob |
| 1703 | 1 | 4 | -0.950000 | 4.587607657   | -4.453609004  | 10.345082885 | 0 | 1 | 0 | # | oh |
| 1704 | 1 | 3 | -1.050000 | 2.078731651   | -4.450573030  | 12.393982417 | 0 | 1 | 0 | # | ob |
| 1705 | 1 | 4 | -0.950000 | 3.177442343   | -0.000940996  | 8.319917115  | 0 | 1 | 0 | # | oh |
| 1706 | 1 | 3 | -1.050000 | 0.509618349   | -0.003976970  | 6.271017583  | 0 | 1 | 0 | # | ob |
| 1707 | 1 | 4 | -0.950000 | 0.589092343   | -4.455490996  | 8.319917115  | 0 | 1 | 0 | # | oh |
| 1708 | 1 | 3 | -1.050000 | 3.097968349   | -4.458526970  | 6.271017583  | 0 | 1 | 0 | # | ob |
| 1709 | 1 | 3 | -1.050000 | 4.194805513   | -7.228199320  | 10.366131378 | 0 | 1 | 0 | # | ob |
| 1710 | 1 | 3 | -1.050000 | 0.153510908   | -2.594160300  | 12.565579711 | 0 | 1 | 0 | # | ob |
| 1711 | 1 | 3 | -1.050000 | 3.569664655   | -2.777048519  | 8.299077932  | 0 | 1 | 0 | # | ob |
| 1712 | 1 | 3 | -1.050000 | 2.435167264   | -7.058553874  | 6.100653738  | 0 | 1 | 0 | # | ob |
| 1713 | 1 | 5 | 2.100000  | 4.222997014   | -7.381980796  | 11.995277170 | 0 | 1 | 0 | # | st |
| 1714 | 1 | 5 | 2.100000  | 3.542027774   | -2.935729218  | 6.670701903  | 0 | 1 | 0 | # | st |

|      |   |   |           |               |              |              |   |   |   |   |    |
|------|---|---|-----------|---------------|--------------|--------------|---|---|---|---|----|
| 1715 | 1 | 5 | 2.100000  | 0.953702986   | -1.527119204 | 6.669722830  | 0 | 1 | 0 | # | st |
| 1716 | 1 | 5 | 2.100000  | 3.542052986   | -5.981669204 | 6.669722830  | 0 | 1 | 0 | # | st |
| 1717 | 1 | 5 | 2.100000  | 4.223022226   | -1.518820782 | 11.994298097 | 0 | 1 | 0 | # | st |
| 1718 | 1 | 5 | 2.100000  | 1.634672226   | -5.973370782 | 11.994298097 | 0 | 1 | 0 | # | st |
| 1719 | 1 | 5 | 2.100000  | 1.634647014   | -2.927430796 | 11.995277170 | 0 | 1 | 0 | # | st |
| 1720 | 1 | 5 | 2.100000  | 0.953677774   | -7.390279218 | 6.670701903  | 0 | 1 | 0 | # | st |
| 1721 | 1 | 1 | 1.575000  | 7.765255029   | -7.434438432 | 9.332770632  | 0 | 1 | 0 | # | ao |
| 1722 | 1 | 1 | 1.575000  | 5.176905029   | -2.979888432 | 9.332770632  | 0 | 1 | 0 | # | ao |
| 1723 | 1 | 1 | 1.575000  | 7.764844971   | -1.474661568 | 9.332229368  | 0 | 1 | 0 | # | ao |
| 1724 | 1 | 1 | 1.575000  | 10.353194971  | -5.929211568 | 9.332229368  | 0 | 1 | 0 | # | ao |
| 1725 | 1 | 2 | 0.425000  | 8.911350872   | -4.451832678 | 10.818615063 | 0 | 1 | 0 | # | ho |
| 1726 | 1 | 2 | 0.425000  | 6.323000872   | -8.906382678 | 10.818615063 | 0 | 1 | 0 | # | ho |
| 1727 | 1 | 2 | 0.425000  | 6.618749128   | -4.457267322 | 7.846384937  | 0 | 1 | 0 | # | ho |
| 1728 | 1 | 2 | 0.425000  | 9.207099128   | -0.002717322 | 7.846384937  | 0 | 1 | 0 | # | ho |
| 1729 | 1 | 3 | -1.050000 | 6.158014655   | -7.231598519 | 8.299077932  | 0 | 1 | 0 | # | ob |
| 1730 | 1 | 3 | -1.050000 | 10.200217264  | -2.604003874 | 6.100653738  | 0 | 1 | 0 | # | ob |
| 1731 | 1 | 3 | -1.050000 | 8.746944487   | -6.135450680 | 8.298868622  | 0 | 1 | 0 | # | ob |
| 1732 | 1 | 3 | -1.050000 | 7.611539092   | -1.860389700 | 6.099420289  | 0 | 1 | 0 | # | ob |
| 1733 | 1 | 3 | -1.050000 | 6.158594487   | -1.680900680 | 8.298868622  | 0 | 1 | 0 | # | ob |
| 1734 | 1 | 3 | -1.050000 | 6.783155513   | -2.773649320 | 10.366131378 | 0 | 1 | 0 | # | ob |
| 1735 | 1 | 3 | -1.050000 | 10.199889092  | -6.314939700 | 6.099420289  | 0 | 1 | 0 | # | ob |
| 1736 | 1 | 3 | -1.050000 | 6.783735345   | -6.132051481 | 10.365922068 | 0 | 1 | 0 | # | ob |
| 1737 | 1 | 3 | -1.050000 | 7.918232736   | -1.850546126 | 12.564346262 | 0 | 1 | 0 | # | ob |
| 1738 | 1 | 3 | -1.050000 | 9.372085345   | -1.677501481 | 10.365922068 | 0 | 1 | 0 | # | ob |
| 1739 | 1 | 3 | -1.050000 | 5.329882736   | -6.305096126 | 12.564346262 | 0 | 1 | 0 | # | ob |
| 1740 | 1 | 3 | -1.050000 | 7.918560908   | -7.048710300 | 12.565579711 | 0 | 1 | 0 | # | ob |
| 1741 | 1 | 4 | -0.950000 | 7.175957657   | -8.908159004 | 10.345082885 | 0 | 1 | 0 | # | oh |
| 1742 | 1 | 3 | -1.050000 | 9.843781651   | -8.905123030 | 12.393982417 | 0 | 1 | 0 | # | ob |
| 1743 | 1 | 4 | -0.950000 | 9.764307657   | -4.453609004 | 10.345082885 | 0 | 1 | 0 | # | oh |
| 1744 | 1 | 3 | -1.050000 | 7.255431651   | -4.450573030 | 12.393982417 | 0 | 1 | 0 | # | ob |
| 1745 | 1 | 4 | -0.950000 | 8.354142343   | -0.000940996 | 8.319917115  | 0 | 1 | 0 | # | oh |
| 1746 | 1 | 3 | -1.050000 | 5.686318349   | -0.003976970 | 6.271017583  | 0 | 1 | 0 | # | ob |
| 1747 | 1 | 4 | -0.950000 | 5.765792343   | -4.455490996 | 8.319917115  | 0 | 1 | 0 | # | oh |
| 1748 | 1 | 3 | -1.050000 | 8.274668349   | -4.458526970 | 6.271017583  | 0 | 1 | 0 | # | ob |
| 1749 | 1 | 3 | -1.050000 | 9.371505513   | -7.228199320 | 10.366131378 | 0 | 1 | 0 | # | ob |
| 1750 | 1 | 3 | -1.050000 | 5.330210908   | -2.594160300 | 12.565579711 | 0 | 1 | 0 | # | ob |
| 1751 | 1 | 3 | -1.050000 | 8.746364655   | -2.777048519 | 8.299077932  | 0 | 1 | 0 | # | ob |
| 1752 | 1 | 3 | -1.050000 | 7.611867264   | -7.058553874 | 6.100653738  | 0 | 1 | 0 | # | ob |
| 1753 | 1 | 5 | 2.100000  | 9.399697014   | -7.381980796 | 11.995277170 | 0 | 1 | 0 | # | st |
| 1754 | 1 | 5 | 2.100000  | 8.718727774   | -2.935729218 | 6.670701903  | 0 | 1 | 0 | # | st |
| 1755 | 1 | 5 | 2.100000  | 6.130402986   | -1.527119204 | 6.669722830  | 0 | 1 | 0 | # | st |
| 1756 | 1 | 5 | 2.100000  | 8.718752986   | -5.981669204 | 6.669722830  | 0 | 1 | 0 | # | st |
| 1757 | 1 | 5 | 2.100000  | 9.399722226   | -1.518820782 | 11.994298097 | 0 | 1 | 0 | # | st |
| 1758 | 1 | 5 | 2.100000  | 6.811372226   | -5.973370782 | 11.994298097 | 0 | 1 | 0 | # | st |
| 1759 | 1 | 5 | 2.100000  | 6.811347014   | -2.927430796 | 11.995277170 | 0 | 1 | 0 | # | st |
| 1760 | 1 | 5 | 2.100000  | 6.130377774   | -7.390279218 | 6.670701903  | 0 | 1 | 0 | # | st |
| 1761 | 1 | 1 | 1.575000  | 12.941955029  | -7.434438432 | 9.332770632  | 0 | 1 | 0 | # | ao |
| 1762 | 1 | 1 | 1.575000  | 10.353605029  | -2.979888432 | 9.332770632  | 0 | 1 | 0 | # | ao |
| 1763 | 1 | 1 | 1.575000  | 12.941544971  | -1.474661568 | 9.332229368  | 0 | 1 | 0 | # | ao |
| 1764 | 1 | 1 | 1.575000  | 15.529894971  | -5.929211568 | 9.332229368  | 0 | 1 | 0 | # | ao |
| 1765 | 1 | 2 | 0.425000  | 14.088050872  | -4.451832678 | 10.818615063 | 0 | 1 | 0 | # | ho |
| 1766 | 1 | 2 | 0.425000  | 11.499700872  | -8.906382678 | 10.818615063 | 0 | 1 | 0 | # | ho |
| 1767 | 1 | 2 | 0.425000  | 11.795449128  | -4.457267322 | 7.846384937  | 0 | 1 | 0 | # | ho |
| 1768 | 1 | 2 | 0.425000  | 14.383799128  | -0.002717322 | 7.846384937  | 0 | 1 | 0 | # | ho |
| 1769 | 1 | 3 | -1.050000 | 11.334714655  | -7.231598519 | 8.299077932  | 0 | 1 | 0 | # | ob |
| 1770 | 1 | 3 | -1.050000 | 15.376917264  | -2.604003874 | 6.100653738  | 0 | 1 | 0 | # | ob |
| 1771 | 1 | 3 | -1.050000 | 13.923644487  | -6.135450680 | 8.298868622  | 0 | 1 | 0 | # | ob |
| 1772 | 1 | 3 | -1.050000 | 12.788239092  | -1.860389700 | 6.099420289  | 0 | 1 | 0 | # | ob |
| 1773 | 1 | 3 | -1.050000 | 11.335294487  | -1.680900680 | 8.298868622  | 0 | 1 | 0 | # | ob |
| 1774 | 1 | 3 | -1.050000 | 11.959855513  | -2.773649320 | 10.366131378 | 0 | 1 | 0 | # | ob |
| 1775 | 1 | 3 | -1.050000 | 15.376589092  | -6.314939700 | 6.099420289  | 0 | 1 | 0 | # | ob |
| 1776 | 1 | 3 | -1.050000 | 11.960435345  | -6.132051481 | 10.365922068 | 0 | 1 | 0 | # | ob |
| 1777 | 1 | 3 | -1.050000 | 13.094932736  | -1.850546126 | 12.564346262 | 0 | 1 | 0 | # | ob |
| 1778 | 1 | 3 | -1.050000 | 14.548785345  | -1.677501481 | 10.365922068 | 0 | 1 | 0 | # | ob |
| 1779 | 1 | 3 | -1.050000 | 10.506582736  | -6.305096126 | 12.564346262 | 0 | 1 | 0 | # | ob |
| 1780 | 1 | 3 | -1.050000 | 13.095260908  | -7.048710300 | 12.565579711 | 0 | 1 | 0 | # | ob |
| 1781 | 1 | 4 | -0.950000 | 12.352657657  | -8.908159004 | 10.345082885 | 0 | 1 | 0 | # | oh |
| 1782 | 1 | 3 | -1.050000 | 15.020481651  | -8.905123030 | 12.393982417 | 0 | 1 | 0 | # | ob |
| 1783 | 1 | 4 | -0.950000 | 14.941007657  | -4.453609004 | 10.345082885 | 0 | 1 | 0 | # | oh |
| 1784 | 1 | 3 | -1.050000 | 12.432131651  | -4.450573030 | 12.393982417 | 0 | 1 | 0 | # | ob |
| 1785 | 1 | 4 | -0.950000 | 13.530842343  | -0.000940996 | 8.319917115  | 0 | 1 | 0 | # | oh |
| 1786 | 1 | 3 | -1.050000 | 10.863018349  | -0.003976970 | 6.271017583  | 0 | 1 | 0 | # | ob |
| 1787 | 1 | 4 | -0.950000 | 10.942492343  | -4.455490996 | 8.319917115  | 0 | 1 | 0 | # | oh |
| 1788 | 1 | 3 | -1.050000 | 13.451368349  | -4.458526970 | 6.271017583  | 0 | 1 | 0 | # | ob |
| 1789 | 1 | 3 | -1.050000 | 14.548205513  | -7.228199320 | 10.366131378 | 0 | 1 | 0 | # | ob |
| 1790 | 1 | 3 | -1.050000 | 10.506910908  | -2.594160300 | 12.565579711 | 0 | 1 | 0 | # | ob |
| 1791 | 1 | 3 | -1.050000 | 13.923064655  | -2.777048519 | 8.299077932  | 0 | 1 | 0 | # | ob |
| 1792 | 1 | 3 | -1.050000 | 12.788567264  | -7.058553874 | 6.100653738  | 0 | 1 | 0 | # | ob |
| 1793 | 1 | 5 | 2.100000  | 14.576397014  | -7.381980796 | 11.995277170 | 0 | 1 | 0 | # | st |
| 1794 | 1 | 5 | 2.100000  | 13.895427774  | -2.935729218 | 6.670701903  | 0 | 1 | 0 | # | st |
| 1795 | 1 | 5 | 2.100000  | 11.307102986  | -1.527119204 | 6.669722830  | 0 | 1 | 0 | # | st |
| 1796 | 1 | 5 | 2.100000  | 13.895452986  | -5.981669204 | 6.669722830  | 0 | 1 | 0 | # | st |
| 1797 | 1 | 5 | 2.100000  | 14.576422226  | -1.518820782 | 11.994298097 | 0 | 1 | 0 | # | st |
| 1798 | 1 | 5 | 2.100000  | 11.988072226  | -5.973370782 | 11.994298097 | 0 | 1 | 0 | # | st |
| 1799 | 1 | 5 | 2.100000  | 11.988047014  | -2.927430796 | 11.995277170 | 0 | 1 | 0 | # | st |
| 1800 | 1 | 5 | 2.100000  | 11.307077774  | -7.390279218 | 6.670701903  | 0 | 1 | 0 | # | st |
| 1801 | 1 | 1 | 1.575000  | -12.941544971 | -7.434438432 | 9.332770632  | 1 | 1 | 0 | # | ao |
| 1802 | 1 | 1 | 1.575000  | -15.529894971 | -2.979888432 | 9.332770632  | 1 | 1 | 0 | # | ao |
| 1803 | 1 | 1 | 1.575000  | -12.941955029 | -1.474661568 | 9.332229368  | 1 | 1 | 0 | # | ao |
| 1804 | 1 | 1 | 1.575000  | -10.353605029 | -5.929211568 | 9.332229368  | 1 | 1 | 0 | # | ao |
| 1805 | 1 | 2 | 0.425000  | -11.795449128 | -4.451832678 | 10.818615063 | 1 | 1 | 0 | # | ho |
| 1806 | 1 | 2 | 0.425000  | -14.383799128 | -8.906382678 | 10.818615063 | 1 | 1 | 0 | # | ho |
| 1807 | 1 | 2 | 0.425000  | -14.088050872 | -4.457267322 | 7.846384937  | 1 | 1 | 0 | # | ho |

|      |   |   |           |               |              |              |   |   |   |   |    |
|------|---|---|-----------|---------------|--------------|--------------|---|---|---|---|----|
| 1808 | 1 | 2 | 0.425000  | -11.499700872 | -0.002717322 | 7.846384937  | 1 | 1 | 0 | # | ho |
| 1809 | 1 | 3 | -1.050000 | -14.548785345 | -7.231598519 | 8.299077932  | 1 | 1 | 0 | # | ob |
| 1810 | 1 | 3 | -1.050000 | -10.506582736 | -2.604003874 | 6.100653738  | 1 | 1 | 0 | # | ob |
| 1811 | 1 | 3 | -1.050000 | -11.959855513 | -6.135450680 | 8.298868622  | 1 | 1 | 0 | # | ob |
| 1812 | 1 | 3 | -1.050000 | -13.095260908 | -1.860389700 | 6.099420289  | 1 | 1 | 0 | # | ob |
| 1813 | 1 | 3 | -1.050000 | -14.548205513 | -1.680900680 | 8.298868622  | 1 | 1 | 0 | # | ob |
| 1814 | 1 | 3 | -1.050000 | -13.923644487 | -2.773649320 | 10.366131378 | 1 | 1 | 0 | # | ob |
| 1815 | 1 | 3 | -1.050000 | -10.506910908 | -6.314939700 | 6.099420289  | 1 | 1 | 0 | # | ob |
| 1816 | 1 | 3 | -1.050000 | -13.923064655 | -6.132051481 | 10.365922068 | 1 | 1 | 0 | # | ob |
| 1817 | 1 | 3 | -1.050000 | -12.788567264 | -1.850546126 | 12.564346262 | 1 | 1 | 0 | # | ob |
| 1818 | 1 | 3 | -1.050000 | -11.334714655 | -1.677501481 | 10.365922068 | 1 | 1 | 0 | # | ob |
| 1819 | 1 | 3 | -1.050000 | -15.376917264 | -6.305096126 | 12.564346262 | 1 | 1 | 0 | # | ob |
| 1820 | 1 | 3 | -1.050000 | -12.788239902 | -7.048710300 | 12.565579711 | 1 | 1 | 0 | # | ob |
| 1821 | 1 | 4 | -0.950000 | -13.530842343 | -8.908159004 | 10.345082885 | 1 | 1 | 0 | # | oh |
| 1822 | 1 | 3 | -1.050000 | -10.863018349 | -8.905123030 | 12.393982417 | 1 | 1 | 0 | # | ob |
| 1823 | 1 | 4 | -0.950000 | -10.942492343 | -4.453609004 | 10.345082885 | 1 | 1 | 0 | # | oh |
| 1824 | 1 | 3 | -1.050000 | -13.451368349 | -4.450573030 | 12.393982417 | 1 | 1 | 0 | # | ob |
| 1825 | 1 | 4 | -0.950000 | -12.352657657 | -0.000940996 | 8.319917115  | 1 | 1 | 0 | # | oh |
| 1826 | 1 | 3 | -1.050000 | -15.020481651 | -0.003976970 | 6.271017583  | 1 | 1 | 0 | # | ob |
| 1827 | 1 | 4 | -0.950000 | -14.941007657 | -4.455490996 | 8.319917115  | 1 | 1 | 0 | # | oh |
| 1828 | 1 | 3 | -1.050000 | -12.432131651 | -4.458526970 | 6.271017583  | 1 | 1 | 0 | # | ob |
| 1829 | 1 | 3 | -1.050000 | -11.335294487 | -7.228199320 | 10.366131378 | 1 | 1 | 0 | # | ob |
| 1830 | 1 | 3 | -1.050000 | -15.376589092 | -2.594160300 | 12.565579711 | 1 | 1 | 0 | # | ob |
| 1831 | 1 | 3 | -1.050000 | -11.960435345 | -2.777048519 | 8.299077932  | 1 | 1 | 0 | # | ob |
| 1832 | 1 | 3 | -1.050000 | -13.094932736 | -7.058553874 | 6.100653738  | 1 | 1 | 0 | # | ob |
| 1833 | 1 | 5 | 2.100000  | -11.307102986 | -7.381980796 | 11.995277170 | 1 | 1 | 0 | # | st |
| 1834 | 1 | 5 | 2.100000  | -11.988072226 | -2.935729218 | 6.670701903  | 1 | 1 | 0 | # | st |
| 1835 | 1 | 5 | 2.100000  | -14.576397014 | -1.527119204 | 6.669722830  | 1 | 1 | 0 | # | st |
| 1836 | 1 | 5 | 2.100000  | -11.988047014 | -5.981669204 | 6.669722830  | 1 | 1 | 0 | # | st |
| 1837 | 1 | 5 | 2.100000  | -11.307077774 | -1.518820782 | 11.994298097 | 1 | 1 | 0 | # | st |
| 1838 | 1 | 5 | 2.100000  | -13.895427774 | -5.973370782 | 11.994298097 | 1 | 1 | 0 | # | st |
| 1839 | 1 | 5 | 2.100000  | -13.895452986 | -2.927430796 | 11.995277170 | 1 | 1 | 0 | # | st |
| 1840 | 1 | 5 | 2.100000  | -14.576422226 | -7.390279218 | 6.670701903  | 1 | 1 | 0 | # | st |
| 1841 | 1 | 1 | 1.575000  | -7.764844971  | -7.434438432 | 9.332770632  | 1 | 1 | 0 | # | ao |
| 1842 | 1 | 1 | 1.575000  | -10.353194971 | -2.979888432 | 9.332770632  | 1 | 1 | 0 | # | ao |
| 1843 | 1 | 1 | 1.575000  | -7.765255029  | -1.474661568 | 9.332229368  | 1 | 1 | 0 | # | ao |
| 1844 | 1 | 1 | 1.575000  | -5.176905029  | -5.929211568 | 9.332229368  | 1 | 1 | 0 | # | ao |
| 1845 | 1 | 2 | 0.425000  | -6.618749128  | -4.451832678 | 10.818615063 | 1 | 1 | 0 | # | ho |
| 1846 | 1 | 2 | 0.425000  | -9.207099128  | -8.906382678 | 10.818615063 | 1 | 1 | 0 | # | ho |
| 1847 | 1 | 2 | 0.425000  | -8.911350872  | -4.457267322 | 7.846384937  | 1 | 1 | 0 | # | ho |
| 1848 | 1 | 2 | 0.425000  | -6.323000872  | -0.002717322 | 7.846384937  | 1 | 1 | 0 | # | ho |
| 1849 | 1 | 3 | -1.050000 | -9.372085345  | -7.231598519 | 8.299077932  | 1 | 1 | 0 | # | ob |
| 1850 | 1 | 3 | -1.050000 | -5.329882736  | -2.604003874 | 6.100653738  | 1 | 1 | 0 | # | ob |
| 1851 | 1 | 3 | -1.050000 | -6.783155513  | -6.135450680 | 8.298868622  | 1 | 1 | 0 | # | ob |
| 1852 | 1 | 3 | -1.050000 | -7.918560908  | -1.860389700 | 6.099420289  | 1 | 1 | 0 | # | ob |
| 1853 | 1 | 3 | -1.050000 | -9.371505513  | -1.680900680 | 8.298868622  | 1 | 1 | 0 | # | ob |
| 1854 | 1 | 3 | -1.050000 | -8.746944487  | -2.773649320 | 10.366131378 | 1 | 1 | 0 | # | ob |
| 1855 | 1 | 3 | -1.050000 | -5.330210908  | -6.314939700 | 6.099420289  | 1 | 1 | 0 | # | ob |
| 1856 | 1 | 3 | -1.050000 | -8.746364655  | -6.132051481 | 10.365922068 | 1 | 1 | 0 | # | ob |
| 1857 | 1 | 3 | -1.050000 | -7.611867264  | -1.850546126 | 12.564346262 | 1 | 1 | 0 | # | ob |
| 1858 | 1 | 3 | -1.050000 | -6.158014655  | -1.677501481 | 10.365922068 | 1 | 1 | 0 | # | ob |
| 1859 | 1 | 3 | -1.050000 | -10.200217264 | -6.305096126 | 12.564346262 | 1 | 1 | 0 | # | ob |
| 1860 | 1 | 3 | -1.050000 | -7.611539902  | -7.048710300 | 12.565579711 | 1 | 1 | 0 | # | ob |
| 1861 | 1 | 4 | -0.950000 | -8.354142343  | -8.908159004 | 10.345082885 | 1 | 1 | 0 | # | oh |
| 1862 | 1 | 3 | -1.050000 | -5.686318349  | -8.905123030 | 12.393982417 | 1 | 1 | 0 | # | ob |
| 1863 | 1 | 4 | -0.950000 | -5.765792343  | -4.453609004 | 10.345082885 | 1 | 1 | 0 | # | oh |
| 1864 | 1 | 3 | -1.050000 | -8.274668349  | -4.450573030 | 12.393982417 | 1 | 1 | 0 | # | ob |
| 1865 | 1 | 4 | -0.950000 | -7.175957657  | -0.000940996 | 8.319917115  | 1 | 1 | 0 | # | oh |
| 1866 | 1 | 3 | -1.050000 | -9.843781651  | -0.003976970 | 6.271017583  | 1 | 1 | 0 | # | ob |
| 1867 | 1 | 4 | -0.950000 | -9.764307657  | -4.455490996 | 8.319917115  | 1 | 1 | 0 | # | oh |
| 1868 | 1 | 3 | -1.050000 | -7.255431651  | -4.458526970 | 6.271017583  | 1 | 1 | 0 | # | ob |
| 1869 | 1 | 3 | -1.050000 | -6.158594487  | -7.228199320 | 10.366131378 | 1 | 1 | 0 | # | ob |
| 1870 | 1 | 3 | -1.050000 | -10.199889092 | -2.594160300 | 12.565579711 | 1 | 1 | 0 | # | ob |
| 1871 | 1 | 3 | -1.050000 | -6.783735345  | -2.777048519 | 8.299077932  | 1 | 1 | 0 | # | ob |
| 1872 | 1 | 3 | -1.050000 | -7.918232736  | -7.058553874 | 6.100653738  | 1 | 1 | 0 | # | ob |
| 1873 | 1 | 5 | 2.100000  | -6.130402986  | -7.381980796 | 11.995277170 | 1 | 1 | 0 | # | st |
| 1874 | 1 | 5 | 2.100000  | -6.811372226  | -2.935729218 | 6.670701903  | 1 | 1 | 0 | # | st |
| 1875 | 1 | 5 | 2.100000  | -9.399697014  | -1.527119204 | 6.669722830  | 1 | 1 | 0 | # | st |
| 1876 | 1 | 5 | 2.100000  | -6.811347014  | -5.981669204 | 6.669722830  | 1 | 1 | 0 | # | st |
| 1877 | 1 | 5 | 2.100000  | -6.130377774  | -1.518820782 | 11.994298097 | 1 | 1 | 0 | # | st |
| 1878 | 1 | 5 | 2.100000  | -8.718727774  | -5.973370782 | 11.994298097 | 1 | 1 | 0 | # | st |
| 1879 | 1 | 5 | 2.100000  | -8.718752986  | -2.927430796 | 11.995277170 | 1 | 1 | 0 | # | st |
| 1880 | 1 | 5 | 2.100000  | -9.399722226  | -7.390279218 | 6.670701903  | 1 | 1 | 0 | # | st |
| 1881 | 1 | 1 | 1.575000  | -2.588144971  | -7.434438432 | 9.332770632  | 1 | 1 | 0 | # | ao |
| 1882 | 1 | 1 | 1.575000  | -5.176494971  | -2.979888432 | 9.332770632  | 1 | 1 | 0 | # | ao |
| 1883 | 1 | 1 | 1.575000  | -2.588555029  | -1.474661568 | 9.332229368  | 1 | 1 | 0 | # | ao |
| 1884 | 1 | 1 | 1.575000  | -0.000205029  | -5.929211568 | 9.332229368  | 1 | 1 | 0 | # | ao |
| 1885 | 1 | 2 | 0.425000  | -1.442049128  | -4.451832678 | 10.818615063 | 1 | 1 | 0 | # | ho |
| 1886 | 1 | 2 | 0.425000  | -4.030399128  | -8.906382678 | 10.818615063 | 1 | 1 | 0 | # | ho |
| 1887 | 1 | 2 | 0.425000  | -3.734650872  | -4.457267322 | 7.846384937  | 1 | 1 | 0 | # | ho |
| 1888 | 1 | 2 | 0.425000  | -1.146300872  | -0.002717322 | 7.846384937  | 1 | 1 | 0 | # | ho |
| 1889 | 1 | 3 | -1.050000 | -4.195385345  | -7.231598519 | 8.299077932  | 1 | 1 | 0 | # | ob |
| 1890 | 1 | 3 | -1.050000 | -0.153182736  | -2.604003874 | 6.100653738  | 1 | 1 | 0 | # | ob |
| 1891 | 1 | 3 | -1.050000 | -1.606455513  | -6.135450680 | 8.298868622  | 1 | 1 | 0 | # | ob |
| 1892 | 1 | 3 | -1.050000 | -2.741860908  | -1.860389700 | 6.099420289  | 1 | 1 | 0 | # | ob |
| 1893 | 1 | 3 | -1.050000 | -4.194805513  | -1.680900680 | 8.298868622  | 1 | 1 | 0 | # | ob |
| 1894 | 1 | 3 | -1.050000 | -3.570244487  | -2.773649320 | 10.366131378 | 1 | 1 | 0 | # | ob |
| 1895 | 1 | 3 | -1.050000 | -0.153510908  | -6.314939700 | 6.099420289  | 1 | 1 | 0 | # | ob |
| 1896 | 1 | 3 | -1.050000 | -3.569664655  | -6.132051481 | 10.365922068 | 1 | 1 | 0 | # | ob |
| 1897 | 1 | 3 | -1.050000 | -2.435167264  | -1.850546126 | 12.564346262 | 1 | 1 | 0 | # | ob |
| 1898 | 1 | 3 | -1.050000 | -0.981314655  | -1.677501481 | 10.365922068 | 1 | 1 | 0 | # | ob |
| 1899 | 1 | 3 | -1.050000 | -5.023517264  | -6.305096126 | 12.564346262 | 1 | 1 | 0 | # | ob |
| 1900 | 1 | 3 | -1.050000 | -2.434839092  | -7.048710300 | 12.565579711 | 1 | 1 | 0 | # | ob |

|      |   |   |           |              |              |               |   |   |   |   |    |
|------|---|---|-----------|--------------|--------------|---------------|---|---|---|---|----|
| 1901 | 1 | 4 | -0.950000 | -3.177442343 | -8.908159004 | 10.345082885  | 1 | 1 | 0 | # | oh |
| 1902 | 1 | 3 | -1.050000 | -0.509618349 | -8.905123030 | 12.393982417  | 1 | 1 | 0 | # | ob |
| 1903 | 1 | 4 | -0.950000 | -0.589092343 | -4.453609004 | 10.345082885  | 1 | 1 | 0 | # | oh |
| 1904 | 1 | 3 | -1.050000 | -3.097968349 | -4.450573030 | 12.393982417  | 1 | 1 | 0 | # | ob |
| 1905 | 1 | 4 | -0.950000 | -1.999257657 | -0.000940996 | 8.319917115   | 1 | 1 | 0 | # | oh |
| 1906 | 1 | 3 | -1.050000 | -4.667081651 | -0.003976970 | 6.271017583   | 1 | 1 | 0 | # | ob |
| 1907 | 1 | 4 | -0.950000 | -4.587607657 | -4.455490996 | 8.319917115   | 1 | 1 | 0 | # | oh |
| 1908 | 1 | 3 | -1.050000 | -2.078731651 | -4.458526970 | 6.271017583   | 1 | 1 | 0 | # | ob |
| 1909 | 1 | 3 | -1.050000 | -0.981894487 | -7.228199320 | 10.366131378  | 1 | 1 | 0 | # | ob |
| 1910 | 1 | 3 | -1.050000 | -5.023189092 | -2.594160300 | 12.565579711  | 1 | 1 | 0 | # | ob |
| 1911 | 1 | 3 | -1.050000 | -1.607035345 | -2.77048519  | 8.299077932   | 1 | 1 | 0 | # | ob |
| 1912 | 1 | 3 | -1.050000 | -2.741532736 | -7.058553874 | 6.100653738   | 1 | 1 | 0 | # | ob |
| 1913 | 1 | 5 | 2.100000  | -0.953702986 | -7.381980796 | 11.995277170  | 1 | 1 | 0 | # | st |
| 1914 | 1 | 5 | 2.100000  | -1.634672226 | -2.935729218 | 6.670701903   | 1 | 1 | 0 | # | st |
| 1915 | 1 | 5 | 2.100000  | -4.222997014 | -1.527119204 | 6.669722830   | 1 | 1 | 0 | # | st |
| 1916 | 1 | 5 | 2.100000  | -1.634647014 | -5.981669204 | 6.669722830   | 1 | 1 | 0 | # | st |
| 1917 | 1 | 5 | 2.100000  | -0.953677774 | -1.518820782 | 11.994298097  | 1 | 1 | 0 | # | st |
| 1918 | 1 | 5 | 2.100000  | -3.542027774 | -5.973370782 | 11.994298097  | 1 | 1 | 0 | # | st |
| 1919 | 1 | 5 | 2.100000  | -3.542052986 | -2.927430796 | 11.995277170  | 1 | 1 | 0 | # | st |
| 1920 | 1 | 5 | 2.100000  | -4.223022226 | -7.390279218 | 6.670701903   | 1 | 1 | 0 | # | st |
| 1921 | 1 | 1 | 1.575000  | 2.588555029  | 1.474661568  | -18.664729368 | 0 | 0 | 1 | # | ao |
| 1922 | 1 | 1 | 1.575000  | 0.00205029   | 5.929211568  | -18.664729368 | 0 | 0 | 1 | # | ao |
| 1923 | 1 | 1 | 1.575000  | 2.588144971  | 7.434438432  | 18.664729368  | 0 | 0 | 0 | # | ao |
| 1924 | 1 | 1 | 1.575000  | 5.176494971  | 2.979888432  | 18.664729368  | 0 | 0 | 0 | # | ao |
| 1925 | 1 | 2 | 0.425000  | 3.734650872  | 4.457267322  | -17.178884937 | 0 | 0 | 1 | # | ho |
| 1926 | 1 | 2 | 0.425000  | 1.146300872  | 0.002717322  | -17.178884937 | 0 | 0 | 1 | # | ho |
| 1927 | 1 | 2 | 0.425000  | 1.442049128  | 4.451832678  | 17.178884937  | 0 | 0 | 0 | # | ho |
| 1928 | 1 | 2 | 0.425000  | 4.030399128  | 8.906382678  | 17.178884937  | 0 | 0 | 0 | # | ho |
| 1929 | 1 | 3 | -1.050000 | 0.981314655  | 1.677501481  | 17.631577932  | 0 | 0 | 0 | # | ob |
| 1930 | 1 | 3 | -1.050000 | 5.023517264  | 6.305096126  | 15.433153738  | 0 | 0 | 0 | # | ob |
| 1931 | 1 | 3 | -1.050000 | 3.570244487  | 2.773649320  | 17.631368622  | 0 | 0 | 0 | # | ob |
| 1932 | 1 | 3 | -1.050000 | 2.434839092  | 7.048710300  | 15.431920289  | 0 | 0 | 0 | # | ob |
| 1933 | 1 | 3 | -1.050000 | 0.981894487  | 7.228199320  | 17.631368622  | 0 | 0 | 0 | # | ob |
| 1934 | 1 | 3 | -1.050000 | 1.606455513  | 6.135450680  | -17.631368622 | 0 | 0 | 1 | # | ob |
| 1935 | 1 | 3 | -1.050000 | 5.023189092  | 2.594160300  | 15.431920289  | 0 | 0 | 0 | # | ob |
| 1936 | 1 | 3 | -1.050000 | 1.607035345  | 2.777048519  | -17.631577932 | 0 | 0 | 1 | # | ob |
| 1937 | 1 | 3 | -1.050000 | 2.741532736  | 7.058553874  | -15.433153738 | 0 | 0 | 1 | # | ob |
| 1938 | 1 | 3 | -1.050000 | 4.195385345  | 7.231598519  | -17.631577932 | 0 | 0 | 1 | # | ob |
| 1939 | 1 | 3 | -1.050000 | 0.153182736  | 2.604003874  | -15.433153738 | 0 | 0 | 1 | # | ob |
| 1940 | 1 | 3 | -1.050000 | 2.741860908  | 1.860389700  | -15.431920289 | 0 | 0 | 1 | # | ob |
| 1941 | 1 | 4 | -0.950000 | 1.999257657  | 0.000940996  | -17.652417115 | 0 | 0 | 1 | # | oh |
| 1942 | 1 | 3 | -1.050000 | 4.667081651  | 0.003976970  | -15.603517583 | 0 | 0 | 1 | # | ob |
| 1943 | 1 | 4 | -0.950000 | 4.587607657  | 4.455490996  | -17.652417115 | 0 | 0 | 1 | # | oh |
| 1944 | 1 | 3 | -1.050000 | 2.078731651  | 4.458526970  | -15.603517583 | 0 | 0 | 1 | # | ob |
| 1945 | 1 | 4 | -0.950000 | 3.177442343  | 8.908159004  | 17.652417115  | 0 | 0 | 0 | # | oh |
| 1946 | 1 | 3 | -1.050000 | 0.509618349  | 8.905123030  | 15.603517583  | 0 | 0 | 0 | # | ob |
| 1947 | 1 | 4 | -0.950000 | 0.589092343  | 4.453609004  | 17.652417115  | 0 | 0 | 0 | # | oh |
| 1948 | 1 | 3 | -1.050000 | 3.097968349  | 4.450573030  | 15.603517583  | 0 | 0 | 0 | # | ob |
| 1949 | 1 | 3 | -1.050000 | 4.194805513  | 1.680900680  | -17.631368622 | 0 | 0 | 1 | # | ob |
| 1950 | 1 | 3 | -1.050000 | 0.153510908  | 6.314939700  | -15.431920289 | 0 | 0 | 1 | # | ob |
| 1951 | 1 | 3 | -1.050000 | 3.569664655  | 6.132051481  | 17.631577932  | 0 | 0 | 0 | # | ob |
| 1952 | 1 | 3 | -1.050000 | 2.435167264  | 1.850546126  | 15.433153738  | 0 | 0 | 0 | # | ob |
| 1953 | 1 | 5 | 2.100000  | 4.222997014  | 1.527119204  | -16.002222830 | 0 | 0 | 1 | # | st |
| 1954 | 1 | 5 | 2.100000  | 3.542027774  | 5.973370782  | 16.003201903  | 0 | 0 | 0 | # | st |
| 1955 | 1 | 5 | 2.100000  | 0.953702986  | 7.381980796  | 16.002222830  | 0 | 0 | 0 | # | st |
| 1956 | 1 | 5 | 2.100000  | 3.542052986  | 2.927430796  | 16.002222830  | 0 | 0 | 0 | # | st |
| 1957 | 1 | 5 | 2.100000  | 4.223022226  | 7.390279218  | -16.003201903 | 0 | 0 | 1 | # | st |
| 1958 | 1 | 5 | 2.100000  | 1.634672226  | 2.935729218  | -16.003201903 | 0 | 0 | 1 | # | st |
| 1959 | 1 | 5 | 2.100000  | 1.634647014  | 5.981669204  | -16.002222830 | 0 | 0 | 1 | # | st |
| 1960 | 1 | 5 | 2.100000  | 0.953677774  | 1.518820782  | 16.003201903  | 0 | 0 | 0 | # | st |
| 1961 | 1 | 1 | 1.575000  | 7.765255029  | 1.474661568  | -18.664729368 | 0 | 0 | 1 | # | ao |
| 1962 | 1 | 1 | 1.575000  | 5.176905029  | 5.929211568  | -18.664729368 | 0 | 0 | 1 | # | ao |
| 1963 | 1 | 1 | 1.575000  | 7.764844971  | 7.434438432  | 18.664729368  | 0 | 0 | 0 | # | ao |
| 1964 | 1 | 1 | 1.575000  | 10.353194971 | 2.979888432  | 18.664729368  | 0 | 0 | 0 | # | ao |
| 1965 | 1 | 2 | 0.425000  | 8.911350872  | 4.457267322  | -17.178884937 | 0 | 0 | 1 | # | ho |
| 1966 | 1 | 2 | 0.425000  | 6.323000872  | 0.002717322  | -17.178884937 | 0 | 0 | 1 | # | ho |
| 1967 | 1 | 2 | 0.425000  | 6.618749128  | 4.451832678  | 17.178884937  | 0 | 0 | 0 | # | ho |
| 1968 | 1 | 2 | 0.425000  | 9.207099128  | 8.906382678  | 17.178884937  | 0 | 0 | 0 | # | ho |
| 1969 | 1 | 3 | -1.050000 | 6.158014655  | 1.677501481  | 17.631577932  | 0 | 0 | 0 | # | ob |
| 1970 | 1 | 3 | -1.050000 | 10.200217264 | 6.305096126  | 15.433153738  | 0 | 0 | 0 | # | ob |
| 1971 | 1 | 3 | -1.050000 | 8.746944487  | 2.773649320  | 17.631368622  | 0 | 0 | 0 | # | ob |
| 1972 | 1 | 3 | -1.050000 | 7.611539092  | 7.048710300  | 15.431920289  | 0 | 0 | 0 | # | ob |
| 1973 | 1 | 3 | -1.050000 | 6.158594487  | 7.228199320  | 17.631368622  | 0 | 0 | 0 | # | ob |
| 1974 | 1 | 3 | -1.050000 | 6.783155513  | 6.135450680  | -17.631368622 | 0 | 0 | 1 | # | ob |
| 1975 | 1 | 3 | -1.050000 | 10.199889092 | 2.594160300  | 15.431920289  | 0 | 0 | 0 | # | ob |
| 1976 | 1 | 3 | -1.050000 | 6.783735345  | 2.777048519  | -17.631577932 | 0 | 0 | 1 | # | ob |
| 1977 | 1 | 3 | -1.050000 | 7.918232736  | 7.058553874  | -15.433153738 | 0 | 0 | 1 | # | ob |
| 1978 | 1 | 3 | -1.050000 | 9.372085345  | 7.231598519  | -17.631577932 | 0 | 0 | 1 | # | ob |
| 1979 | 1 | 3 | -1.050000 | 5.329882736  | 2.604003874  | -15.433153738 | 0 | 0 | 1 | # | ob |
| 1980 | 1 | 3 | -1.050000 | 7.918560908  | 1.860389700  | -15.431920289 | 0 | 0 | 1 | # | ob |
| 1981 | 1 | 4 | -0.950000 | 7.175957657  | 0.000940996  | -17.652417115 | 0 | 0 | 1 | # | oh |
| 1982 | 1 | 3 | -1.050000 | 9.843781651  | 0.003976970  | -15.603517583 | 0 | 0 | 1 | # | ob |
| 1983 | 1 | 4 | -0.950000 | 9.764307657  | 4.455490996  | -17.652417115 | 0 | 0 | 1 | # | oh |
| 1984 | 1 | 3 | -1.050000 | 7.255431651  | 4.458526970  | -15.603517583 | 0 | 0 | 1 | # | ob |
| 1985 | 1 | 4 | -0.950000 | 8.354142343  | 8.908159004  | 17.652417115  | 0 | 0 | 0 | # | oh |
| 1986 | 1 | 3 | -1.050000 | 5.686318349  | 8.905123030  | 15.603517583  | 0 | 0 | 0 | # | ob |
| 1987 | 1 | 4 | -0.950000 | 5.765792343  | 4.453609004  | 17.652417115  | 0 | 0 | 0 | # | oh |
| 1988 | 1 | 3 | -1.050000 | 8.274668349  | 4.450573030  | 15.603517583  | 0 | 0 | 0 | # | ob |
| 1989 | 1 | 3 | -1.050000 | 9.371505513  | 1.680900680  | -17.631368622 | 0 | 0 | 1 | # | ob |
| 1990 | 1 | 3 | -1.050000 | 5.330210908  | 6.314939700  | -15.431920289 | 0 | 0 | 1 | # | ob |
| 1991 | 1 | 3 | -1.050000 | 8.746364655  | 6.132051481  | 17.631577932  | 0 | 0 | 0 | # | ob |
| 1992 | 1 | 3 | -1.050000 | 7.611867264  | 1.850546126  | 15.433153738  | 0 | 0 | 0 | # | ob |
| 1993 | 1 | 5 | 2.100000  | 9.399697014  | 1.527119204  | -16.002222830 | 0 | 0 | 1 | # | st |

|      |   |   |           |               |             |               |   |   |   |   |    |
|------|---|---|-----------|---------------|-------------|---------------|---|---|---|---|----|
| 1994 | 1 | 5 | 2.100000  | 8.718727774   | 5.973370782 | 16.003201903  | 0 | 0 | 0 | # | st |
| 1995 | 1 | 5 | 2.100000  | 6.130402986   | 7.381980796 | 16.002222830  | 0 | 0 | 0 | # | st |
| 1996 | 1 | 5 | 2.100000  | 8.718752986   | 2.927430796 | 16.002222830  | 0 | 0 | 0 | # | st |
| 1997 | 1 | 5 | 2.100000  | 9.399722226   | 7.390279218 | -16.003201903 | 0 | 0 | 1 | # | st |
| 1998 | 1 | 5 | 2.100000  | 6.811372226   | 2.935729218 | -16.003201903 | 0 | 0 | 1 | # | st |
| 1999 | 1 | 5 | 2.100000  | 6.811347014   | 5.981669204 | -16.002222830 | 0 | 0 | 1 | # | st |
| 2000 | 1 | 5 | 2.100000  | 6.130377774   | 1.518820782 | 16.003201903  | 0 | 0 | 0 | # | st |
| 2001 | 1 | 1 | 1.575000  | 12.941955029  | 1.474661568 | -18.664729368 | 0 | 0 | 1 | # | ao |
| 2002 | 1 | 1 | 1.575000  | 10.353605029  | 5.929211568 | -18.664729368 | 0 | 0 | 1 | # | ao |
| 2003 | 1 | 1 | 1.575000  | 12.941544971  | 7.434438432 | 18.664729368  | 0 | 0 | 0 | # | ao |
| 2004 | 1 | 1 | 1.575000  | 15.529894971  | 2.979888432 | 18.664729368  | 0 | 0 | 0 | # | ao |
| 2005 | 1 | 2 | 0.425000  | 14.088050872  | 4.457267322 | -17.178884937 | 0 | 0 | 1 | # | ho |
| 2006 | 1 | 2 | 0.425000  | 11.499700872  | 0.002717322 | -17.178884937 | 0 | 0 | 1 | # | ho |
| 2007 | 1 | 2 | 0.425000  | 11.795449128  | 4.451832678 | 17.178884937  | 0 | 0 | 0 | # | ho |
| 2008 | 1 | 2 | 0.425000  | 14.383799128  | 8.906382678 | 17.178884937  | 0 | 0 | 0 | # | ho |
| 2009 | 1 | 3 | -1.050000 | 11.334714655  | 1.677501481 | 17.631577932  | 0 | 0 | 0 | # | ob |
| 2010 | 1 | 3 | -1.050000 | 15.376917264  | 6.305096126 | 15.433153738  | 0 | 0 | 0 | # | ob |
| 2011 | 1 | 3 | -1.050000 | 13.923644487  | 2.773649320 | 17.631368622  | 0 | 0 | 0 | # | ob |
| 2012 | 1 | 3 | -1.050000 | 12.788239092  | 7.048710300 | 15.431920289  | 0 | 0 | 0 | # | ob |
| 2013 | 1 | 3 | -1.050000 | 11.335294487  | 7.228199320 | 17.631368622  | 0 | 0 | 0 | # | ob |
| 2014 | 1 | 3 | -1.050000 | 11.959855513  | 6.135450680 | -17.631368622 | 0 | 0 | 1 | # | ob |
| 2015 | 1 | 3 | -1.050000 | 15.376589092  | 2.594160300 | 15.431920289  | 0 | 0 | 0 | # | ob |
| 2016 | 1 | 3 | -1.050000 | 11.960435345  | 2.777048519 | -17.631577932 | 0 | 0 | 1 | # | ob |
| 2017 | 1 | 3 | -1.050000 | 13.094932736  | 7.058553874 | -15.433153738 | 0 | 0 | 1 | # | ob |
| 2018 | 1 | 3 | -1.050000 | 14.548785345  | 7.231598519 | -17.631577932 | 0 | 0 | 1 | # | ob |
| 2019 | 1 | 3 | -1.050000 | 10.506582736  | 2.604003874 | -15.433153738 | 0 | 0 | 1 | # | ob |
| 2020 | 1 | 3 | -1.050000 | 13.095260908  | 1.860389700 | -15.431920289 | 0 | 0 | 1 | # | ob |
| 2021 | 1 | 4 | -0.950000 | 12.352657657  | 0.000940996 | -17.652417115 | 0 | 0 | 1 | # | oh |
| 2022 | 1 | 3 | -1.050000 | 15.020481651  | 0.003976970 | -15.603517583 | 0 | 0 | 1 | # | ob |
| 2023 | 1 | 4 | -0.950000 | 14.941007657  | 4.455490996 | -17.652417115 | 0 | 0 | 1 | # | oh |
| 2024 | 1 | 3 | -1.050000 | 12.432131651  | 4.458526970 | -15.603517583 | 0 | 0 | 1 | # | ob |
| 2025 | 1 | 4 | -0.950000 | 13.530842343  | 8.908159004 | 17.652417115  | 0 | 0 | 0 | # | oh |
| 2026 | 1 | 3 | -1.050000 | 10.863018349  | 8.905123030 | 15.603517583  | 0 | 0 | 0 | # | ob |
| 2027 | 1 | 4 | -0.950000 | 10.942492343  | 4.453609004 | 17.652417115  | 0 | 0 | 0 | # | oh |
| 2028 | 1 | 3 | -1.050000 | 13.451368349  | 4.450573030 | 15.603517583  | 0 | 0 | 0 | # | ob |
| 2029 | 1 | 3 | -1.050000 | 14.548205513  | 1.680900680 | -17.631368622 | 0 | 0 | 1 | # | ob |
| 2030 | 1 | 3 | -1.050000 | 10.506910908  | 6.314939700 | -15.431920289 | 0 | 0 | 1 | # | ob |
| 2031 | 1 | 3 | -1.050000 | 13.923064655  | 6.132051481 | 17.631577932  | 0 | 0 | 0 | # | ob |
| 2032 | 1 | 3 | -1.050000 | 12.788567264  | 1.850546126 | 15.433153738  | 0 | 0 | 0 | # | ob |
| 2033 | 1 | 5 | 2.100000  | 14.576397014  | 1.527119204 | -16.002222830 | 0 | 0 | 1 | # | st |
| 2034 | 1 | 5 | 2.100000  | 13.895427774  | 5.973370782 | 16.003201903  | 0 | 0 | 0 | # | st |
| 2035 | 1 | 5 | 2.100000  | 11.307102986  | 7.381980796 | 16.002222830  | 0 | 0 | 0 | # | st |
| 2036 | 1 | 5 | 2.100000  | 13.895452986  | 2.927430796 | 16.002222830  | 0 | 0 | 0 | # | st |
| 2037 | 1 | 5 | 2.100000  | 14.576422226  | 7.390279218 | -16.003201903 | 0 | 0 | 1 | # | st |
| 2038 | 1 | 5 | 2.100000  | 11.988072226  | 2.935729218 | -16.003201903 | 0 | 0 | 1 | # | st |
| 2039 | 1 | 5 | 2.100000  | 11.988047014  | 5.981669204 | -16.002222830 | 0 | 0 | 1 | # | st |
| 2040 | 1 | 5 | 2.100000  | 11.307077774  | 1.518820782 | 16.003201903  | 0 | 0 | 0 | # | st |
| 2041 | 1 | 1 | 1.575000  | -12.941544971 | 1.474661568 | -18.664729368 | 1 | 0 | 1 | # | ao |
| 2042 | 1 | 1 | 1.575000  | -15.529894971 | 5.929211568 | -18.664729368 | 1 | 0 | 1 | # | ao |
| 2043 | 1 | 1 | 1.575000  | -12.941955029 | 7.434438432 | 18.664729368  | 1 | 0 | 0 | # | ao |
| 2044 | 1 | 1 | 1.575000  | -10.353605029 | 2.979888432 | 18.664729368  | 1 | 0 | 0 | # | ao |
| 2045 | 1 | 2 | 0.425000  | -11.795449128 | 4.457267322 | -17.178884937 | 1 | 0 | 1 | # | ho |
| 2046 | 1 | 2 | 0.425000  | -14.383799128 | 0.002717322 | -17.178884937 | 1 | 0 | 1 | # | ho |
| 2047 | 1 | 2 | 0.425000  | -14.088050872 | 4.451832678 | 17.178884937  | 1 | 0 | 0 | # | ho |
| 2048 | 1 | 2 | 0.425000  | -11.499700872 | 8.906382678 | 17.178884937  | 1 | 0 | 0 | # | ho |
| 2049 | 1 | 3 | -1.050000 | -14.548785345 | 1.677501481 | 17.631577932  | 1 | 0 | 0 | # | ob |
| 2050 | 1 | 3 | -1.050000 | -10.506582736 | 6.305096126 | 15.433153738  | 1 | 0 | 0 | # | ob |
| 2051 | 1 | 3 | -1.050000 | -11.959855513 | 2.773649320 | 17.631368622  | 1 | 0 | 0 | # | ob |
| 2052 | 1 | 3 | -1.050000 | -13.095260908 | 7.048710300 | 15.431920289  | 1 | 0 | 0 | # | ob |
| 2053 | 1 | 3 | -1.050000 | -14.548205513 | 7.228199320 | 17.631368622  | 1 | 0 | 0 | # | ob |
| 2054 | 1 | 3 | -1.050000 | -13.923644487 | 6.135450680 | -17.631368622 | 1 | 0 | 1 | # | ob |
| 2055 | 1 | 3 | -1.050000 | -10.506910908 | 2.594160300 | 15.431920289  | 1 | 0 | 0 | # | ob |
| 2056 | 1 | 3 | -1.050000 | -13.923064655 | 2.777048519 | -17.631577932 | 1 | 0 | 1 | # | ob |
| 2057 | 1 | 3 | -1.050000 | -12.788567264 | 7.058553874 | -15.433153738 | 1 | 0 | 1 | # | ob |
| 2058 | 1 | 3 | -1.050000 | -11.334714655 | 7.231598519 | -17.631577932 | 1 | 0 | 1 | # | ob |
| 2059 | 1 | 3 | -1.050000 | -15.376917264 | 2.604003874 | -15.433153738 | 1 | 0 | 1 | # | ob |
| 2060 | 1 | 3 | -1.050000 | -12.788239092 | 1.860389700 | -15.431920289 | 1 | 0 | 1 | # | ob |
| 2061 | 1 | 4 | -0.950000 | -13.530842343 | 0.000940996 | -17.652417115 | 1 | 0 | 1 | # | oh |
| 2062 | 1 | 3 | -1.050000 | -10.863018349 | 0.003976970 | -15.603517583 | 1 | 0 | 1 | # | ob |
| 2063 | 1 | 4 | -0.950000 | -10.942492343 | 4.455490996 | -17.652417115 | 1 | 0 | 1 | # | oh |
| 2064 | 1 | 3 | -1.050000 | -13.451368349 | 4.458526970 | -15.603517583 | 1 | 0 | 1 | # | ob |
| 2065 | 1 | 4 | -0.950000 | -12.352657657 | 8.908159004 | 17.652417115  | 1 | 0 | 0 | # | oh |
| 2066 | 1 | 3 | -1.050000 | -15.020481651 | 8.905123030 | 15.603517583  | 1 | 0 | 0 | # | ob |
| 2067 | 1 | 4 | -0.950000 | -14.941007657 | 4.453609004 | 17.652417115  | 1 | 0 | 0 | # | oh |
| 2068 | 1 | 3 | -1.050000 | -12.432131651 | 4.450573030 | 15.603517583  | 1 | 0 | 0 | # | ob |
| 2069 | 1 | 3 | -1.050000 | -11.335294487 | 1.680900680 | -17.631368622 | 1 | 0 | 1 | # | ob |
| 2070 | 1 | 3 | -1.050000 | -15.376589092 | 6.314939700 | -15.431920289 | 1 | 0 | 1 | # | ob |
| 2071 | 1 | 3 | -1.050000 | -11.960435345 | 6.132051481 | 17.631577932  | 1 | 0 | 0 | # | ob |
| 2072 | 1 | 3 | -1.050000 | -13.094932736 | 1.850546126 | 15.433153738  | 1 | 0 | 0 | # | ob |
| 2073 | 1 | 5 | 2.100000  | -11.307102986 | 1.527119204 | -16.002222830 | 1 | 0 | 1 | # | st |
| 2074 | 1 | 5 | 2.100000  | -11.988072226 | 5.973370782 | 16.003201903  | 1 | 0 | 0 | # | st |
| 2075 | 1 | 5 | 2.100000  | -14.576397014 | 7.381980796 | 16.002222830  | 1 | 0 | 0 | # | st |
| 2076 | 1 | 5 | 2.100000  | -11.988047014 | 2.927430796 | 16.002222830  | 1 | 0 | 0 | # | st |
| 2077 | 1 | 5 | 2.100000  | -11.307077774 | 7.390279218 | -16.003201903 | 1 | 0 | 1 | # | st |
| 2078 | 1 | 5 | 2.100000  | -13.895427774 | 2.935729218 | -16.003201903 | 1 | 0 | 1 | # | st |
| 2079 | 1 | 5 | 2.100000  | -13.895452986 | 5.981669204 | -16.002222830 | 1 | 0 | 1 | # | st |
| 2080 | 1 | 5 | 2.100000  | -14.576422226 | 1.518820782 | 16.003201903  | 1 | 0 | 0 | # | st |
| 2081 | 1 | 1 | 1.575000  | -7.764844971  | 1.474661568 | -18.664729368 | 1 | 0 | 1 | # | ao |
| 2082 | 1 | 1 | 1.575000  | -10.353194971 | 5.929211568 | -18.664729368 | 1 | 0 | 1 | # | ao |
| 2083 | 1 | 1 | 1.575000  | -7.765255029  | 7.434438432 | 18.664729368  | 1 | 0 | 0 | # | ao |
| 2084 | 1 | 1 | 1.575000  | -5.176905029  | 2.979888432 | 18.664729368  | 1 | 0 | 0 | # | ao |
| 2085 | 1 | 2 | 0.425000  | -6.618749128  | 4.457267322 | -17.178884937 | 1 | 0 | 1 | # | ho |
| 2086 | 1 | 2 | 0.425000  | -9.207099128  | 0.002717322 | -17.178884937 | 1 | 0 | 1 | # | ho |

|      |   |   |           |               |              |               |   |   |   |   |    |
|------|---|---|-----------|---------------|--------------|---------------|---|---|---|---|----|
| 2087 | 1 | 2 | 0.425000  | -8.911350872  | 4.451832678  | 17.178884937  | 1 | 0 | 0 | # | ho |
| 2088 | 1 | 2 | 0.425000  | -6.323000872  | 8.906382678  | 17.178884937  | 1 | 0 | 0 | # | ho |
| 2089 | 1 | 3 | -1.050000 | -9.372085345  | 1.677501481  | 17.631577932  | 1 | 0 | 0 | # | ob |
| 2090 | 1 | 3 | -1.050000 | -5.329882736  | 6.305096126  | 15.433153738  | 1 | 0 | 0 | # | ob |
| 2091 | 1 | 3 | -1.050000 | -6.783155513  | 2.773649320  | 17.631368622  | 1 | 0 | 0 | # | ob |
| 2092 | 1 | 3 | -1.050000 | -7.918560908  | 7.048710300  | 15.431920289  | 1 | 0 | 0 | # | ob |
| 2093 | 1 | 3 | -1.050000 | -9.371505513  | 7.228199320  | 17.631368622  | 1 | 0 | 0 | # | ob |
| 2094 | 1 | 3 | -1.050000 | -8.746944487  | 6.135450680  | -17.631368622 | 1 | 0 | 1 | # | ob |
| 2095 | 1 | 3 | -1.050000 | -5.330210908  | 2.594160300  | 15.431920289  | 1 | 0 | 0 | # | ob |
| 2096 | 1 | 3 | -1.050000 | -8.746364655  | 2.777048519  | -17.631577932 | 1 | 0 | 1 | # | ob |
| 2097 | 1 | 3 | -1.050000 | -7.611867264  | 7.058553874  | -15.433153738 | 1 | 0 | 1 | # | ob |
| 2098 | 1 | 3 | -1.050000 | -6.158014655  | 7.231598519  | -17.631577932 | 1 | 0 | 1 | # | ob |
| 2099 | 1 | 3 | -1.050000 | -10.200217264 | 2.604003874  | -15.433153738 | 1 | 0 | 1 | # | ob |
| 2100 | 1 | 3 | -1.050000 | -7.611539092  | 1.860389700  | -15.431920289 | 1 | 0 | 1 | # | ob |
| 2101 | 1 | 4 | -0.950000 | -8.354142343  | 0.000940996  | -17.652417115 | 1 | 0 | 1 | # | oh |
| 2102 | 1 | 3 | -1.050000 | -5.686318349  | 0.003976970  | -15.603517583 | 1 | 0 | 1 | # | ob |
| 2103 | 1 | 4 | -0.950000 | -5.765792343  | 4.455490996  | -17.652417115 | 1 | 0 | 1 | # | oh |
| 2104 | 1 | 3 | -1.050000 | -8.274668349  | 4.458526970  | -15.603517583 | 1 | 0 | 1 | # | ob |
| 2105 | 1 | 4 | -0.950000 | -7.175957657  | 8.908159004  | 17.652417115  | 1 | 0 | 0 | # | oh |
| 2106 | 1 | 3 | -1.050000 | -9.843781651  | 8.905123030  | 15.603517583  | 1 | 0 | 0 | # | ob |
| 2107 | 1 | 4 | -0.950000 | -9.764307657  | 4.453609004  | 17.652417115  | 1 | 0 | 0 | # | oh |
| 2108 | 1 | 3 | -1.050000 | -7.255431651  | 4.450573030  | 15.603517583  | 1 | 0 | 0 | # | ob |
| 2109 | 1 | 3 | -1.050000 | -6.158594487  | 1.680900680  | -17.631368622 | 1 | 0 | 1 | # | ob |
| 2110 | 1 | 3 | -1.050000 | -10.199889092 | 6.314939700  | -15.431920289 | 1 | 0 | 1 | # | ob |
| 2111 | 1 | 3 | -1.050000 | -6.783735345  | 6.132051481  | 17.631577932  | 1 | 0 | 0 | # | ob |
| 2112 | 1 | 3 | -1.050000 | -7.918232736  | 1.850546126  | 15.433153738  | 1 | 0 | 0 | # | ob |
| 2113 | 1 | 5 | 2.100000  | -6.130402986  | 1.527119204  | -16.002222830 | 1 | 0 | 1 | # | st |
| 2114 | 1 | 5 | 2.100000  | -6.811372226  | 5.973370782  | 16.003201903  | 1 | 0 | 0 | # | st |
| 2115 | 1 | 5 | 2.100000  | -9.399697014  | 7.381980796  | 16.002222830  | 1 | 0 | 0 | # | st |
| 2116 | 1 | 5 | 2.100000  | -6.811347014  | 2.927430796  | 16.002222830  | 1 | 0 | 0 | # | st |
| 2117 | 1 | 5 | 2.100000  | -6.130377774  | 7.390279218  | -16.003201903 | 1 | 0 | 1 | # | st |
| 2118 | 1 | 5 | 2.100000  | -8.718727774  | 2.935729218  | -16.003201903 | 1 | 0 | 1 | # | st |
| 2119 | 1 | 5 | 2.100000  | -8.718752986  | 5.981669204  | -16.002222830 | 1 | 0 | 1 | # | st |
| 2120 | 1 | 5 | 2.100000  | -9.399722226  | 1.518820782  | 16.003201903  | 1 | 0 | 0 | # | st |
| 2121 | 1 | 1 | 1.575000  | -2.588144971  | 1.474661568  | -18.664729368 | 1 | 0 | 1 | # | ao |
| 2122 | 1 | 1 | 1.575000  | -5.176494971  | 5.929211568  | -18.664729368 | 1 | 0 | 1 | # | ao |
| 2123 | 1 | 1 | 1.575000  | -2.588555029  | 7.434438432  | 18.664729368  | 1 | 0 | 0 | # | ao |
| 2124 | 1 | 1 | 1.575000  | -0.000205029  | 2.979888432  | 18.664729368  | 1 | 0 | 0 | # | ao |
| 2125 | 1 | 2 | 0.425000  | -1.442049128  | 4.457267322  | -17.178884937 | 1 | 0 | 1 | # | ho |
| 2126 | 1 | 2 | 0.425000  | -4.030399128  | 0.002717322  | -17.178884937 | 1 | 0 | 1 | # | ho |
| 2127 | 1 | 2 | 0.425000  | -3.734650872  | 4.451832678  | 17.178884937  | 1 | 0 | 0 | # | ho |
| 2128 | 1 | 2 | 0.425000  | -1.146300872  | 8.906382678  | 17.178884937  | 1 | 0 | 0 | # | ho |
| 2129 | 1 | 3 | -1.050000 | -4.195385345  | 1.677501481  | 17.631577932  | 1 | 0 | 0 | # | ob |
| 2130 | 1 | 3 | -1.050000 | -0.153182736  | 6.305096126  | 15.433153738  | 1 | 0 | 0 | # | ob |
| 2131 | 1 | 3 | -1.050000 | -1.606455513  | 2.773649320  | 17.631368622  | 1 | 0 | 0 | # | ob |
| 2132 | 1 | 3 | -1.050000 | -2.741860908  | 7.048710300  | 15.431920289  | 1 | 0 | 0 | # | ob |
| 2133 | 1 | 3 | -1.050000 | -4.194805513  | 7.228199320  | 17.631368622  | 1 | 0 | 0 | # | ob |
| 2134 | 1 | 3 | -1.050000 | -3.570244487  | 6.135450680  | -17.631368622 | 1 | 0 | 1 | # | ob |
| 2135 | 1 | 3 | -1.050000 | -0.153510908  | 2.594160300  | 15.431920289  | 1 | 0 | 0 | # | ob |
| 2136 | 1 | 3 | -1.050000 | -3.569664655  | 2.777048519  | -17.631577932 | 1 | 0 | 1 | # | ob |
| 2137 | 1 | 3 | -1.050000 | -2.435167264  | 7.058553874  | -15.433153738 | 1 | 0 | 1 | # | ob |
| 2138 | 1 | 3 | -1.050000 | -0.981314655  | 7.231598519  | -17.631577932 | 1 | 0 | 1 | # | ob |
| 2139 | 1 | 3 | -1.050000 | -5.023517264  | 2.604003874  | -15.433153738 | 1 | 0 | 1 | # | ob |
| 2140 | 1 | 3 | -1.050000 | -2.434839092  | 1.860389700  | -15.431920289 | 1 | 0 | 1 | # | ob |
| 2141 | 1 | 4 | -0.950000 | -3.177442343  | 0.000940996  | -17.652417115 | 1 | 0 | 1 | # | oh |
| 2142 | 1 | 3 | -1.050000 | -0.509618349  | 0.003976970  | -15.603517583 | 1 | 0 | 1 | # | ob |
| 2143 | 1 | 4 | -0.950000 | -0.589092343  | 4.455490996  | -17.652417115 | 1 | 0 | 1 | # | oh |
| 2144 | 1 | 3 | -1.050000 | -3.097968349  | 4.458526970  | -15.603517583 | 1 | 0 | 1 | # | ob |
| 2145 | 1 | 4 | -0.950000 | -1.999257657  | 8.908159004  | 17.652417115  | 1 | 0 | 0 | # | oh |
| 2146 | 1 | 3 | -1.050000 | -4.667081651  | 8.905123030  | 15.603517583  | 1 | 0 | 0 | # | ob |
| 2147 | 1 | 4 | -0.950000 | -4.587607657  | 4.453609004  | 17.652417115  | 1 | 0 | 0 | # | oh |
| 2148 | 1 | 3 | -1.050000 | -2.078731651  | 4.450573030  | 15.603517583  | 1 | 0 | 0 | # | ob |
| 2149 | 1 | 3 | -1.050000 | -0.981894487  | 1.680900680  | -17.631368622 | 1 | 0 | 1 | # | ob |
| 2150 | 1 | 3 | -1.050000 | -5.023189092  | 6.314939700  | -15.431920289 | 1 | 0 | 1 | # | ob |
| 2151 | 1 | 3 | -1.050000 | -1.607035345  | 6.132051481  | 17.631577932  | 1 | 0 | 0 | # | ob |
| 2152 | 1 | 3 | -1.050000 | -2.741532736  | 1.850546126  | 15.433153738  | 1 | 0 | 0 | # | ob |
| 2153 | 1 | 5 | 2.100000  | -0.953702986  | 1.527119204  | -16.002222830 | 1 | 0 | 1 | # | st |
| 2154 | 1 | 5 | 2.100000  | -1.634672226  | 5.973370782  | 16.003201903  | 1 | 0 | 0 | # | st |
| 2155 | 1 | 5 | 2.100000  | -4.222997014  | 7.381980796  | 16.002222830  | 1 | 0 | 0 | # | st |
| 2156 | 1 | 5 | 2.100000  | -1.634647014  | 2.927430796  | 16.002222830  | 1 | 0 | 0 | # | st |
| 2157 | 1 | 5 | 2.100000  | -0.953677774  | 7.390279218  | -16.003201903 | 1 | 0 | 1 | # | st |
| 2158 | 1 | 5 | 2.100000  | -3.542027774  | 2.935729218  | -16.003201903 | 1 | 0 | 1 | # | st |
| 2159 | 1 | 5 | 2.100000  | -3.542052986  | 5.981669204  | -16.002222830 | 1 | 0 | 1 | # | st |
| 2160 | 1 | 5 | 2.100000  | -4.223022226  | 1.518820782  | 16.003201903  | 1 | 0 | 0 | # | st |
| 2161 | 1 | 1 | 1.575000  | 2.588555029   | 10.383761568 | -18.664729368 | 0 | 0 | 1 | # | ao |
| 2162 | 1 | 1 | 1.575000  | 0.000205029   | 14.838311568 | -18.664729368 | 0 | 0 | 1 | # | ao |
| 2163 | 1 | 1 | 1.575000  | 2.588144971   | 16.343538432 | 18.664729368  | 0 | 0 | 0 | # | ao |
| 2164 | 1 | 1 | 1.575000  | 5.176494971   | 11.888988432 | 18.664729368  | 0 | 0 | 0 | # | ao |
| 2165 | 1 | 2 | 0.425000  | 3.734650872   | 13.366367322 | -17.178884937 | 0 | 0 | 1 | # | ho |
| 2166 | 1 | 2 | 0.425000  | 1.146300872   | 8.911817322  | -17.178884937 | 0 | 0 | 1 | # | ho |
| 2167 | 1 | 2 | 0.425000  | 1.442049128   | 13.360932678 | 17.178884937  | 0 | 0 | 0 | # | ho |
| 2168 | 1 | 2 | 0.425000  | 4.030399128   | 17.815482678 | 17.178884937  | 0 | 0 | 0 | # | ho |
| 2169 | 1 | 3 | -1.050000 | 0.981314655   | 10.586601481 | 17.631577932  | 0 | 0 | 0 | # | ob |
| 2170 | 1 | 3 | -1.050000 | 5.023517264   | 15.214196126 | 15.433153738  | 0 | 0 | 0 | # | ob |
| 2171 | 1 | 3 | -1.050000 | 3.570244487   | 11.682749320 | 17.631368622  | 0 | 0 | 0 | # | ob |
| 2172 | 1 | 3 | -1.050000 | 2.434839092   | 15.957810300 | 15.431920289  | 0 | 0 | 0 | # | ob |
| 2173 | 1 | 3 | -1.050000 | 0.981894487   | 16.137299320 | 17.631368622  | 0 | 0 | 0 | # | ob |
| 2174 | 1 | 3 | -1.050000 | 1.606455513   | 15.044550680 | -17.631368622 | 0 | 0 | 1 | # | ob |
| 2175 | 1 | 3 | -1.050000 | 5.023189092   | 11.503260300 | 15.431920289  | 0 | 0 | 0 | # | ob |
| 2176 | 1 | 3 | -1.050000 | 1.607035345   | 11.686148519 | -17.631577932 | 0 | 0 | 1 | # | ob |
| 2177 | 1 | 3 | -1.050000 | 2.741532736   | 15.967653874 | -15.433153738 | 0 | 0 | 1 | # | ob |
| 2178 | 1 | 3 | -1.050000 | 4.195385345   | 16.140698519 | -17.631577932 | 0 | 0 | 1 | # | ob |
| 2179 | 1 | 3 | -1.050000 | 0.153182736   | 11.513103874 | -15.433153738 | 0 | 0 | 1 | # | ob |



|      |   |   |           |              |              |               |   |   |   |   |    |
|------|---|---|-----------|--------------|--------------|---------------|---|---|---|---|----|
| 2180 | 1 | 3 | -1.050000 | 2.741860908  | 10.769489700 | -15.431920289 | 0 | 0 | 1 | # | ob |
| 2181 | 1 | 4 | -0.950000 | 1.999257657  | 8.910040996  | -17.652417115 | 0 | 0 | 1 | # | oh |
| 2182 | 1 | 3 | -1.050000 | 4.667081651  | 8.913076970  | -15.603517583 | 0 | 0 | 1 | # | ob |
| 2183 | 1 | 4 | -0.950000 | 4.587607657  | 13.364590996 | -17.652417115 | 0 | 0 | 1 | # | oh |
| 2184 | 1 | 3 | -1.050000 | 2.078731651  | 13.367626970 | -15.603517583 | 0 | 0 | 1 | # | ob |
| 2185 | 1 | 4 | -0.950000 | 3.177442343  | 17.817259004 | 17.652417115  | 0 | 0 | 0 | # | oh |
| 2186 | 1 | 3 | -1.050000 | 0.509618349  | 17.814223030 | 15.603517583  | 0 | 0 | 0 | # | ob |
| 2187 | 1 | 4 | -0.950000 | 0.589092343  | 13.362709004 | 17.652417115  | 0 | 0 | 0 | # | oh |
| 2188 | 1 | 3 | -1.050000 | 3.097968349  | 13.359673030 | 15.603517583  | 0 | 0 | 0 | # | ob |
| 2189 | 1 | 3 | -1.050000 | 4.194805513  | 10.590000680 | -17.631368622 | 0 | 0 | 1 | # | ob |
| 2190 | 1 | 3 | -1.050000 | 0.153510908  | 15.224039700 | -15.431920289 | 0 | 0 | 1 | # | ob |
| 2191 | 1 | 3 | -1.050000 | 3.569664655  | 15.041151481 | 17.631577932  | 0 | 0 | 0 | # | ob |
| 2192 | 1 | 3 | -1.050000 | 2.435167264  | 10.759646126 | 15.433153738  | 0 | 0 | 0 | # | ob |
| 2193 | 1 | 5 | 2.100000  | 4.222997014  | 10.436219204 | -16.002228300 | 0 | 0 | 1 | # | st |
| 2194 | 1 | 5 | 2.100000  | 3.542027774  | 14.882470782 | 16.003201903  | 0 | 0 | 0 | # | st |
| 2195 | 1 | 5 | 2.100000  | 0.953702986  | 16.291080796 | 16.002228300  | 0 | 0 | 0 | # | st |
| 2196 | 1 | 5 | 2.100000  | 3.542052986  | 11.836530796 | 16.002228300  | 0 | 0 | 0 | # | st |
| 2197 | 1 | 5 | 2.100000  | 4.223022226  | 16.299379218 | -16.003201903 | 0 | 0 | 1 | # | st |
| 2198 | 1 | 5 | 2.100000  | 1.634672226  | 11.844829218 | -16.003201903 | 0 | 0 | 1 | # | st |
| 2199 | 1 | 5 | 2.100000  | 1.634647014  | 14.890769204 | -16.002228300 | 0 | 0 | 1 | # | st |
| 2200 | 1 | 5 | 2.100000  | 0.953677774  | 10.427920782 | 16.003201903  | 0 | 0 | 0 | # | st |
| 2201 | 1 | 1 | 1.575000  | 7.765255029  | 10.383761568 | -18.664729368 | 0 | 0 | 1 | # | ao |
| 2202 | 1 | 1 | 1.575000  | 5.176905029  | 14.838311568 | -18.664729368 | 0 | 0 | 1 | # | ao |
| 2203 | 1 | 1 | 1.575000  | 7.764844971  | 16.343538432 | 18.664729368  | 0 | 0 | 0 | # | ao |
| 2204 | 1 | 1 | 1.575000  | 10.353194971 | 11.888988432 | 18.664729368  | 0 | 0 | 0 | # | ao |
| 2205 | 1 | 2 | 0.425000  | 8.911350872  | 13.366367322 | -17.178884937 | 0 | 0 | 1 | # | ho |
| 2206 | 1 | 2 | 0.425000  | 6.323000872  | 8.911817322  | -17.178884937 | 0 | 0 | 1 | # | ho |
| 2207 | 1 | 2 | 0.425000  | 6.618749128  | 13.360932678 | 17.178884937  | 0 | 0 | 0 | # | ho |
| 2208 | 1 | 2 | 0.425000  | 9.207099128  | 17.815482678 | 17.178884937  | 0 | 0 | 0 | # | ho |
| 2209 | 1 | 3 | -1.050000 | 6.158014655  | 10.586601481 | 17.631577932  | 0 | 0 | 0 | # | ob |
| 2210 | 1 | 3 | -1.050000 | 10.200217264 | 15.214196126 | 15.433153738  | 0 | 0 | 0 | # | ob |
| 2211 | 1 | 3 | -1.050000 | 8.746944487  | 11.682749320 | 17.631368622  | 0 | 0 | 0 | # | ob |
| 2212 | 1 | 3 | -1.050000 | 7.611539092  | 15.957810300 | 15.431920289  | 0 | 0 | 0 | # | ob |
| 2213 | 1 | 3 | -1.050000 | 6.158594487  | 16.137299320 | 17.631368622  | 0 | 0 | 0 | # | ob |
| 2214 | 1 | 3 | -1.050000 | 6.783155513  | 15.044550680 | -17.631368622 | 0 | 0 | 1 | # | ob |
| 2215 | 1 | 3 | -1.050000 | 10.199889092 | 11.503260300 | 15.431920289  | 0 | 0 | 0 | # | ob |
| 2216 | 1 | 3 | -1.050000 | 6.783735345  | 11.686148519 | -17.631577932 | 0 | 0 | 1 | # | ob |
| 2217 | 1 | 3 | -1.050000 | 7.918232736  | 15.967653874 | -15.433153738 | 0 | 0 | 1 | # | ob |
| 2218 | 1 | 3 | -1.050000 | 9.372085345  | 16.140698519 | -17.631577932 | 0 | 0 | 1 | # | ob |
| 2219 | 1 | 3 | -1.050000 | 5.329882736  | 11.513103874 | -15.433153738 | 0 | 0 | 1 | # | ob |
| 2220 | 1 | 3 | -1.050000 | 7.918560908  | 10.769489700 | -15.431920289 | 0 | 0 | 1 | # | ob |
| 2221 | 1 | 4 | -0.950000 | 7.175957657  | 8.910040996  | -17.652417115 | 0 | 0 | 1 | # | oh |
| 2222 | 1 | 3 | -1.050000 | 9.843781651  | 8.913076970  | -15.603517583 | 0 | 0 | 1 | # | ob |
| 2223 | 1 | 4 | -0.950000 | 9.764307657  | 13.364590996 | -17.652417115 | 0 | 0 | 1 | # | oh |
| 2224 | 1 | 3 | -1.050000 | 7.255431651  | 13.367626970 | -15.603517583 | 0 | 0 | 1 | # | ob |
| 2225 | 1 | 4 | -0.950000 | 8.354142343  | 17.817259004 | 17.652417115  | 0 | 0 | 0 | # | oh |
| 2226 | 1 | 3 | -1.050000 | 5.686318349  | 17.814223030 | 15.603517583  | 0 | 0 | 0 | # | ob |
| 2227 | 1 | 4 | -0.950000 | 5.765792343  | 13.362709004 | 17.652417115  | 0 | 0 | 0 | # | oh |
| 2228 | 1 | 3 | -1.050000 | 8.274668349  | 13.359673030 | 15.603517583  | 0 | 0 | 0 | # | ob |
| 2229 | 1 | 3 | -1.050000 | 9.371505513  | 10.590000680 | -17.631368622 | 0 | 0 | 1 | # | ob |
| 2230 | 1 | 3 | -1.050000 | 5.330210908  | 15.224039700 | -15.431920289 | 0 | 0 | 1 | # | ob |
| 2231 | 1 | 3 | -1.050000 | 8.746364655  | 15.041151481 | 17.631577932  | 0 | 0 | 0 | # | ob |
| 2232 | 1 | 3 | -1.050000 | 7.611867264  | 10.759646126 | 15.433153738  | 0 | 0 | 0 | # | ob |
| 2233 | 1 | 5 | 2.100000  | 9.399697014  | 10.436219204 | -16.002228300 | 0 | 0 | 1 | # | st |
| 2234 | 1 | 5 | 2.100000  | 8.718727774  | 14.882470782 | 16.003201903  | 0 | 0 | 0 | # | st |
| 2235 | 1 | 5 | 2.100000  | 6.130402986  | 16.291080796 | 16.002228300  | 0 | 0 | 0 | # | st |
| 2236 | 1 | 5 | 2.100000  | 8.718752986  | 11.836530796 | 16.002228300  | 0 | 0 | 0 | # | st |
| 2237 | 1 | 5 | 2.100000  | 9.399722226  | 16.299379218 | -16.003201903 | 0 | 0 | 1 | # | st |
| 2238 | 1 | 5 | 2.100000  | 6.811372226  | 11.844829218 | -16.003201903 | 0 | 0 | 1 | # | st |
| 2239 | 1 | 5 | 2.100000  | 6.811347014  | 14.890769204 | -16.002228300 | 0 | 0 | 1 | # | st |
| 2240 | 1 | 5 | 2.100000  | 6.130377774  | 10.427920782 | 16.003201903  | 0 | 0 | 0 | # | st |
| 2241 | 1 | 1 | 1.575000  | 12.941955029 | 10.383761568 | -18.664729368 | 0 | 0 | 1 | # | ao |
| 2242 | 1 | 1 | 1.575000  | 10.353605029 | 14.838311568 | -18.664729368 | 0 | 0 | 1 | # | ao |
| 2243 | 1 | 1 | 1.575000  | 12.941544971 | 16.343538432 | 18.664729368  | 0 | 0 | 0 | # | ao |
| 2244 | 1 | 1 | 1.575000  | 15.29894971  | 11.888988432 | 18.664729368  | 0 | 0 | 0 | # | ao |
| 2245 | 1 | 2 | 0.425000  | 14.088050872 | 13.366367322 | -17.178884937 | 0 | 0 | 1 | # | ho |
| 2246 | 1 | 2 | 0.425000  | 11.499700872 | 8.911817322  | -17.178884937 | 0 | 0 | 1 | # | ho |
| 2247 | 1 | 2 | 0.425000  | 11.795449128 | 13.360932678 | 17.178884937  | 0 | 0 | 0 | # | ho |
| 2248 | 1 | 2 | 0.425000  | 14.383799128 | 17.815482678 | 17.178884937  | 0 | 0 | 0 | # | ho |
| 2249 | 1 | 3 | -1.050000 | 11.334714655 | 10.586601481 | 17.631577932  | 0 | 0 | 0 | # | ob |
| 2250 | 1 | 3 | -1.050000 | 15.376917264 | 15.214196126 | 15.433153738  | 0 | 0 | 0 | # | ob |
| 2251 | 1 | 3 | -1.050000 | 13.923644487 | 11.682749320 | 17.631368622  | 0 | 0 | 0 | # | ob |
| 2252 | 1 | 3 | -1.050000 | 12.788239092 | 15.957810300 | 15.431920289  | 0 | 0 | 0 | # | ob |
| 2253 | 1 | 3 | -1.050000 | 11.335294487 | 16.137299320 | 17.631368622  | 0 | 0 | 0 | # | ob |
| 2254 | 1 | 3 | -1.050000 | 11.959855513 | 15.044550680 | -17.631368622 | 0 | 0 | 1 | # | ob |
| 2255 | 1 | 3 | -1.050000 | 15.376589092 | 11.503260300 | 15.431920289  | 0 | 0 | 0 | # | ob |
| 2256 | 1 | 3 | -1.050000 | 11.960435345 | 11.686148519 | -17.631577932 | 0 | 0 | 1 | # | ob |
| 2257 | 1 | 3 | -1.050000 | 13.094932736 | 15.967653874 | -15.433153738 | 0 | 0 | 1 | # | ob |
| 2258 | 1 | 3 | -1.050000 | 14.548785345 | 16.140698519 | -17.631577932 | 0 | 0 | 1 | # | ob |
| 2259 | 1 | 3 | -1.050000 | 10.506582736 | 11.513103874 | -15.433153738 | 0 | 0 | 1 | # | ob |
| 2260 | 1 | 3 | -1.050000 | 13.095260908 | 10.769489700 | -15.431920289 | 0 | 0 | 1 | # | ob |
| 2261 | 1 | 4 | -0.950000 | 12.352657657 | 8.910040996  | -17.652417115 | 0 | 0 | 1 | # | oh |
| 2262 | 1 | 3 | -1.050000 | 15.020481651 | 8.913076970  | -15.603517583 | 0 | 0 | 1 | # | ob |
| 2263 | 1 | 4 | -0.950000 | 14.941007657 | 13.364590996 | -17.652417115 | 0 | 0 | 1 | # | oh |
| 2264 | 1 | 3 | -1.050000 | 12.432131651 | 13.367626970 | -15.603517583 | 0 | 0 | 1 | # | ob |
| 2265 | 1 | 4 | -0.950000 | 13.530842343 | 17.817259004 | 17.652417115  | 0 | 0 | 0 | # | oh |
| 2266 | 1 | 3 | -1.050000 | 10.863018349 | 17.814223030 | 15.603517583  | 0 | 0 | 0 | # | ob |
| 2267 | 1 | 4 | -0.950000 | 10.942492343 | 13.362709004 | 17.652417115  | 0 | 0 | 0 | # | oh |
| 2268 | 1 | 3 | -1.050000 | 13.451368349 | 13.359673030 | 15.603517583  | 0 | 0 | 0 | # | ob |
| 2269 | 1 | 3 | -1.050000 | 14.548205513 | 10.590000680 | -17.631368622 | 0 | 0 | 1 | # | ob |
| 2270 | 1 | 3 | -1.050000 | 10.506910908 | 15.224039700 | -15.431920289 | 0 | 0 | 1 | # | ob |
| 2271 | 1 | 3 | -1.050000 | 13.923064655 | 15.041151481 | 17.631577932  | 0 | 0 | 0 | # | ob |
| 2272 | 1 | 3 | -1.050000 | 12.788567264 | 10.759646126 | 15.433153738  | 0 | 0 | 0 | # | ob |

|      |   |   |           |               |              |               |   |   |   |   |    |
|------|---|---|-----------|---------------|--------------|---------------|---|---|---|---|----|
| 2273 | 1 | 5 | 2.100000  | 14.576397014  | 10.436219204 | -16.002222830 | 0 | 0 | 1 | # | st |
| 2274 | 1 | 5 | 2.100000  | 13.895427774  | 14.882470782 | 16.003201903  | 0 | 0 | 0 | # | st |
| 2275 | 1 | 5 | 2.100000  | 11.307102986  | 16.291080796 | 16.002222830  | 0 | 0 | 0 | # | st |
| 2276 | 1 | 5 | 2.100000  | 13.895452986  | 11.836530796 | 16.002222830  | 0 | 0 | 0 | # | st |
| 2277 | 1 | 5 | 2.100000  | 14.576422226  | 16.299379218 | -16.003201903 | 0 | 0 | 1 | # | st |
| 2278 | 1 | 5 | 2.100000  | 11.988072226  | 11.844829218 | -16.003201903 | 0 | 0 | 1 | # | st |
| 2279 | 1 | 5 | 2.100000  | 11.988047014  | 14.890769204 | -16.002222830 | 0 | 0 | 1 | # | st |
| 2280 | 1 | 5 | 2.100000  | 11.307077774  | 10.427920782 | 16.003201903  | 0 | 0 | 0 | # | st |
| 2281 | 1 | 1 | 1.575000  | -12.941544971 | 10.383761568 | -18.664729368 | 1 | 0 | 1 | # | ao |
| 2282 | 1 | 1 | 1.575000  | -15.529894971 | 14.838311568 | -18.664729368 | 1 | 0 | 1 | # | ao |
| 2283 | 1 | 1 | 1.575000  | -12.941955029 | 16.343538432 | 18.664729368  | 1 | 0 | 0 | # | ao |
| 2284 | 1 | 1 | 1.575000  | -10.353605029 | 11.888988432 | 18.664729368  | 1 | 0 | 0 | # | ao |
| 2285 | 1 | 2 | 0.425000  | -11.795449128 | 13.366367322 | -17.178884937 | 1 | 0 | 1 | # | ho |
| 2286 | 1 | 2 | 0.425000  | -14.383799128 | 8.911817322  | -17.178884937 | 1 | 0 | 1 | # | ho |
| 2287 | 1 | 2 | 0.425000  | -14.088050872 | 13.360932678 | 17.178884937  | 1 | 0 | 0 | # | ho |
| 2288 | 1 | 2 | 0.425000  | -11.499700872 | 17.815482678 | 17.178884937  | 1 | 0 | 0 | # | ho |
| 2289 | 1 | 3 | -1.050000 | -14.548785345 | 10.586601481 | 17.631577932  | 1 | 0 | 0 | # | ob |
| 2290 | 1 | 3 | -1.050000 | -10.506582736 | 15.214196126 | 15.433153738  | 1 | 0 | 0 | # | ob |
| 2291 | 1 | 3 | -1.050000 | -11.959855513 | 11.682749320 | 17.631368622  | 1 | 0 | 0 | # | ob |
| 2292 | 1 | 3 | -1.050000 | -13.095260908 | 15.957810300 | 15.431920289  | 1 | 0 | 0 | # | ob |
| 2293 | 1 | 3 | -1.050000 | -14.548205513 | 16.137299320 | 17.631368622  | 1 | 0 | 0 | # | ob |
| 2294 | 1 | 3 | -1.050000 | -13.923644487 | 15.044550680 | -17.631368622 | 1 | 0 | 1 | # | ob |
| 2295 | 1 | 3 | -1.050000 | -10.506910908 | 11.503260300 | 15.431920289  | 1 | 0 | 0 | # | ob |
| 2296 | 1 | 3 | -1.050000 | -13.923064655 | 11.686148519 | -17.631577932 | 1 | 0 | 1 | # | ob |
| 2297 | 1 | 3 | -1.050000 | -12.788567264 | 15.967653874 | -15.433153738 | 1 | 0 | 1 | # | ob |
| 2298 | 1 | 3 | -1.050000 | -11.334714655 | 16.140698519 | -17.631577932 | 1 | 0 | 1 | # | ob |
| 2299 | 1 | 3 | -1.050000 | -15.376917264 | 11.513103874 | -15.433153738 | 1 | 0 | 1 | # | ob |
| 2300 | 1 | 3 | -1.050000 | -12.788239092 | 10.769489700 | -15.431920289 | 1 | 0 | 1 | # | ob |
| 2301 | 1 | 4 | -0.950000 | -13.530842343 | 8.910040996  | -17.652417115 | 1 | 0 | 1 | # | oh |
| 2302 | 1 | 3 | -1.050000 | -10.863018349 | 8.913076970  | -15.603517583 | 1 | 0 | 1 | # | ob |
| 2303 | 1 | 4 | -0.950000 | -10.942492343 | 13.364590996 | -17.652417115 | 1 | 0 | 1 | # | oh |
| 2304 | 1 | 3 | -1.050000 | -13.451368349 | 13.367626970 | -15.603517583 | 1 | 0 | 1 | # | ob |
| 2305 | 1 | 4 | -0.950000 | -12.352657657 | 17.817259004 | 17.652417115  | 1 | 0 | 0 | # | oh |
| 2306 | 1 | 3 | -1.050000 | -15.020481651 | 17.814223030 | 15.603517583  | 1 | 0 | 0 | # | ob |
| 2307 | 1 | 4 | -0.950000 | -14.941007657 | 13.362709004 | 17.652417115  | 1 | 0 | 0 | # | oh |
| 2308 | 1 | 3 | -1.050000 | -12.432131651 | 13.359673030 | 15.603517583  | 1 | 0 | 0 | # | ob |
| 2309 | 1 | 3 | -1.050000 | -11.335294487 | 10.590000680 | -17.631368622 | 1 | 0 | 1 | # | ob |
| 2310 | 1 | 3 | -1.050000 | -15.376589092 | 15.224039700 | -15.431920289 | 1 | 0 | 1 | # | ob |
| 2311 | 1 | 3 | -1.050000 | -11.960435345 | 15.041151481 | 17.631577932  | 1 | 0 | 0 | # | ob |
| 2312 | 1 | 3 | -1.050000 | -13.094932736 | 10.759646126 | 15.433153738  | 1 | 0 | 0 | # | ob |
| 2313 | 1 | 5 | 2.100000  | -11.307102986 | 10.436219204 | -16.002222830 | 1 | 0 | 1 | # | st |
| 2314 | 1 | 5 | 2.100000  | -11.988072226 | 14.882470782 | 16.003201903  | 1 | 0 | 0 | # | st |
| 2315 | 1 | 5 | 2.100000  | -14.576397014 | 16.291080796 | 16.002222830  | 1 | 0 | 0 | # | st |
| 2316 | 1 | 5 | 2.100000  | -11.988047014 | 11.836530796 | 16.002222830  | 1 | 0 | 0 | # | st |
| 2317 | 1 | 5 | 2.100000  | -11.307077774 | 16.299379218 | -16.003201903 | 1 | 0 | 1 | # | st |
| 2318 | 1 | 5 | 2.100000  | -13.895427774 | 11.844829218 | -16.003201903 | 1 | 0 | 1 | # | st |
| 2319 | 1 | 5 | 2.100000  | -13.895452986 | 14.890769204 | -16.002222830 | 1 | 0 | 1 | # | st |
| 2320 | 1 | 5 | 2.100000  | -14.576422226 | 10.427920782 | 16.003201903  | 1 | 0 | 0 | # | st |
| 2321 | 1 | 1 | 1.575000  | -7.764844971  | 10.383761568 | -18.664729368 | 1 | 0 | 1 | # | ao |
| 2322 | 1 | 1 | 1.575000  | -10.353194971 | 14.838311568 | -18.664729368 | 1 | 0 | 1 | # | ao |
| 2323 | 1 | 1 | 1.575000  | -7.765255029  | 16.343538432 | 18.664729368  | 1 | 0 | 0 | # | ao |
| 2324 | 1 | 1 | 1.575000  | -5.176905029  | 11.888988432 | 18.664729368  | 1 | 0 | 0 | # | ao |
| 2325 | 1 | 2 | 0.425000  | -6.618749128  | 13.366367322 | -17.178884937 | 1 | 0 | 1 | # | ho |
| 2326 | 1 | 2 | 0.425000  | -9.207099128  | 8.911817322  | -17.178884937 | 1 | 0 | 1 | # | ho |
| 2327 | 1 | 2 | 0.425000  | -8.911350872  | 13.360932678 | 17.178884937  | 1 | 0 | 0 | # | ho |
| 2328 | 1 | 2 | 0.425000  | -6.323000872  | 17.815482678 | 17.178884937  | 1 | 0 | 0 | # | ho |
| 2329 | 1 | 3 | -1.050000 | -9.372085345  | 10.586601481 | 17.631577932  | 1 | 0 | 0 | # | ob |
| 2330 | 1 | 3 | -1.050000 | -5.329882736  | 15.214196126 | 15.433153738  | 1 | 0 | 0 | # | ob |
| 2331 | 1 | 3 | -1.050000 | -6.783155513  | 11.682749320 | 17.631368622  | 1 | 0 | 0 | # | ob |
| 2332 | 1 | 3 | -1.050000 | -7.918560908  | 15.957810300 | 15.431920289  | 1 | 0 | 0 | # | ob |
| 2333 | 1 | 3 | -1.050000 | -9.371505513  | 16.137299320 | 17.631368622  | 1 | 0 | 0 | # | ob |
| 2334 | 1 | 3 | -1.050000 | -8.746944487  | 15.044550680 | -17.631368622 | 1 | 0 | 1 | # | ob |
| 2335 | 1 | 3 | -1.050000 | -5.330210908  | 11.503260300 | 15.431920289  | 1 | 0 | 0 | # | ob |
| 2336 | 1 | 3 | -1.050000 | -8.746364655  | 11.686148519 | -17.631577932 | 1 | 0 | 1 | # | ob |
| 2337 | 1 | 3 | -1.050000 | -7.611867264  | 15.967653874 | -15.433153738 | 1 | 0 | 1 | # | ob |
| 2338 | 1 | 3 | -1.050000 | -6.158014655  | 16.140698519 | -17.631577932 | 1 | 0 | 1 | # | ob |
| 2339 | 1 | 3 | -1.050000 | -10.200217264 | 11.513103874 | -15.433153738 | 1 | 0 | 1 | # | ob |
| 2340 | 1 | 3 | -1.050000 | -7.611539092  | 10.769489700 | -15.431920289 | 1 | 0 | 1 | # | ob |
| 2341 | 1 | 4 | -0.950000 | -8.354142343  | 8.910040996  | -17.652417115 | 1 | 0 | 1 | # | oh |
| 2342 | 1 | 3 | -1.050000 | -5.686318349  | 8.913076970  | -15.603517583 | 1 | 0 | 1 | # | ob |
| 2343 | 1 | 4 | -0.950000 | -5.765792343  | 13.364590996 | -17.652417115 | 1 | 0 | 1 | # | oh |
| 2344 | 1 | 3 | -1.050000 | -8.274668349  | 13.367626970 | -15.603517583 | 1 | 0 | 1 | # | ob |
| 2345 | 1 | 4 | -0.950000 | -7.175957657  | 17.817259004 | 17.652417115  | 1 | 0 | 0 | # | oh |
| 2346 | 1 | 3 | -1.050000 | -9.843781651  | 17.814223030 | 15.603517583  | 1 | 0 | 0 | # | ob |
| 2347 | 1 | 4 | -0.950000 | -9.764307657  | 13.362709004 | 17.652417115  | 1 | 0 | 0 | # | oh |
| 2348 | 1 | 3 | -1.050000 | -7.255431651  | 13.359673030 | 15.603517583  | 1 | 0 | 0 | # | ob |
| 2349 | 1 | 3 | -1.050000 | -6.158594487  | 10.590000680 | -17.631368622 | 1 | 0 | 1 | # | ob |
| 2350 | 1 | 3 | -1.050000 | -10.199889092 | 15.224039700 | -15.431920289 | 1 | 0 | 1 | # | ob |
| 2351 | 1 | 3 | -1.050000 | -6.783735345  | 15.041151481 | 17.631577932  | 1 | 0 | 0 | # | ob |
| 2352 | 1 | 3 | -1.050000 | -7.918232736  | 10.759646126 | 15.433153738  | 1 | 0 | 0 | # | ob |
| 2353 | 1 | 5 | 2.100000  | -6.130402986  | 10.436219204 | -16.002222830 | 1 | 0 | 1 | # | st |
| 2354 | 1 | 5 | 2.100000  | -6.811372226  | 14.882470782 | 16.003201903  | 1 | 0 | 0 | # | st |
| 2355 | 1 | 5 | 2.100000  | -9.399697014  | 16.291080796 | 16.002222830  | 1 | 0 | 0 | # | st |
| 2356 | 1 | 5 | 2.100000  | -6.811347014  | 11.836530796 | 16.002222830  | 1 | 0 | 0 | # | st |
| 2357 | 1 | 5 | 2.100000  | -6.130377774  | 16.299379218 | -16.003201903 | 1 | 0 | 1 | # | st |
| 2358 | 1 | 5 | 2.100000  | -8.718727774  | 11.844829218 | -16.003201903 | 1 | 0 | 1 | # | st |
| 2359 | 1 | 5 | 2.100000  | -8.718752986  | 14.890769204 | -16.002222830 | 1 | 0 | 1 | # | st |
| 2360 | 1 | 5 | 2.100000  | -9.399722226  | 10.427920782 | 16.003201903  | 1 | 0 | 0 | # | st |
| 2361 | 1 | 1 | 1.575000  | -2.588144971  | 10.383761568 | -18.664729368 | 1 | 0 | 1 | # | ao |
| 2362 | 1 | 1 | 1.575000  | -5.176494971  | 14.838311568 | -18.664729368 | 1 | 0 | 1 | # | ao |
| 2363 | 1 | 1 | 1.575000  | -2.588555029  | 16.343538432 | 18.664729368  | 1 | 0 | 0 | # | ao |
| 2364 | 1 | 1 | 1.575000  | -0.000205029  | 11.888988432 | 18.664729368  | 1 | 0 | 0 | # | ao |
| 2365 | 1 | 2 | 0.425000  | -1.442049128  | 13.366367322 | -17.178884937 | 1 | 0 | 1 | # | ho |

|      |   |   |           |              |               |               |   |   |   |   |    |
|------|---|---|-----------|--------------|---------------|---------------|---|---|---|---|----|
| 2366 | 1 | 2 | 0.425000  | -4.030399128 | 8.911817322   | -17.178884937 | 1 | 0 | 1 | # | ho |
| 2367 | 1 | 2 | 0.425000  | -3.734650872 | 13.360932678  | 17.178884937  | 1 | 0 | 0 | # | ho |
| 2368 | 1 | 2 | 0.425000  | -1.146300872 | 17.815482678  | 17.178884937  | 1 | 0 | 0 | # | ho |
| 2369 | 1 | 3 | -1.050000 | -4.195385345 | 10.586601481  | 17.631577932  | 1 | 0 | 0 | # | ob |
| 2370 | 1 | 3 | -1.050000 | -0.153182736 | 15.214196126  | 15.433153738  | 1 | 0 | 0 | # | ob |
| 2371 | 1 | 3 | -1.050000 | -1.606455513 | 11.682749320  | 17.631368622  | 1 | 0 | 0 | # | ob |
| 2372 | 1 | 3 | -1.050000 | -2.741860908 | 15.957810300  | 15.431920289  | 1 | 0 | 0 | # | ob |
| 2373 | 1 | 3 | -1.050000 | -4.194805513 | 16.137299320  | 17.631368622  | 1 | 0 | 0 | # | ob |
| 2374 | 1 | 3 | -1.050000 | -3.570244487 | 15.044550680  | -17.631368622 | 1 | 0 | 1 | # | ob |
| 2375 | 1 | 3 | -1.050000 | -0.153510908 | 11.503260300  | 15.431920289  | 1 | 0 | 0 | # | ob |
| 2376 | 1 | 3 | -1.050000 | -3.569664655 | 11.686148519  | -17.631577932 | 1 | 0 | 1 | # | ob |
| 2377 | 1 | 3 | -1.050000 | -2.435167264 | 15.967653874  | -15.433153738 | 1 | 0 | 1 | # | ob |
| 2378 | 1 | 3 | -1.050000 | -0.981314655 | 16.140698519  | -17.631577932 | 1 | 0 | 1 | # | ob |
| 2379 | 1 | 3 | -1.050000 | -5.023517264 | 11.513103874  | -15.433153738 | 1 | 0 | 1 | # | ob |
| 2380 | 1 | 3 | -1.050000 | -2.434839092 | 10.769489700  | -15.431920289 | 1 | 0 | 1 | # | ob |
| 2381 | 1 | 4 | -0.950000 | -3.177442343 | 8.910040996   | -17.652417115 | 1 | 0 | 1 | # | oh |
| 2382 | 1 | 3 | -1.050000 | -0.509618349 | 8.913076970   | -15.603517583 | 1 | 0 | 1 | # | ob |
| 2383 | 1 | 4 | -0.950000 | -0.589092343 | 13.364590996  | -17.652417115 | 1 | 0 | 1 | # | oh |
| 2384 | 1 | 3 | -1.050000 | -3.097968349 | 13.367626970  | -15.603517583 | 1 | 0 | 1 | # | ob |
| 2385 | 1 | 4 | -0.950000 | -1.999257657 | 17.817259004  | 17.652417115  | 1 | 0 | 0 | # | oh |
| 2386 | 1 | 3 | -1.050000 | -4.667081651 | 17.814223030  | 15.603517583  | 1 | 0 | 0 | # | ob |
| 2387 | 1 | 4 | -0.950000 | -4.587607657 | 13.362709004  | 17.652417115  | 1 | 0 | 0 | # | oh |
| 2388 | 1 | 3 | -1.050000 | -2.078731651 | 13.359673030  | 15.603517583  | 1 | 0 | 0 | # | ob |
| 2389 | 1 | 3 | -1.050000 | -0.981894487 | 10.590000680  | -17.631368622 | 1 | 0 | 1 | # | ob |
| 2390 | 1 | 3 | -1.050000 | -5.023189092 | 15.224039700  | -15.431920289 | 1 | 0 | 1 | # | ob |
| 2391 | 1 | 3 | -1.050000 | -1.607035345 | 15.041151481  | 17.631577932  | 1 | 0 | 0 | # | ob |
| 2392 | 1 | 3 | -1.050000 | -2.741532736 | 10.759646126  | 15.433153738  | 1 | 0 | 0 | # | ob |
| 2393 | 1 | 5 | 2.100000  | -0.953702986 | 10.436219204  | -16.002222830 | 1 | 0 | 1 | # | st |
| 2394 | 1 | 5 | 2.100000  | -1.634672226 | 14.882470782  | 16.003201903  | 1 | 0 | 0 | # | st |
| 2395 | 1 | 5 | 2.100000  | -4.222997014 | 16.291080796  | 16.002222830  | 1 | 0 | 0 | # | st |
| 2396 | 1 | 5 | 2.100000  | -1.634647014 | 11.836530796  | 16.002222830  | 1 | 0 | 0 | # | st |
| 2397 | 1 | 5 | 2.100000  | -0.953677774 | 16.299379218  | -16.003201903 | 1 | 0 | 1 | # | st |
| 2398 | 1 | 5 | 2.100000  | -3.542027774 | 11.844829218  | -16.003201903 | 1 | 0 | 1 | # | st |
| 2399 | 1 | 5 | 2.100000  | -3.542052986 | 14.890769204  | -16.002222830 | 1 | 0 | 1 | # | st |
| 2400 | 1 | 5 | 2.100000  | -4.223022226 | 10.427920782  | 16.003201903  | 1 | 0 | 0 | # | st |
| 2401 | 1 | 1 | 1.575000  | 2.588555029  | -16.343538432 | -18.664729368 | 0 | 1 | 1 | # | ao |
| 2402 | 1 | 1 | 1.575000  | 0.000205029  | -11.888988432 | -18.664729368 | 0 | 1 | 1 | # | ao |
| 2403 | 1 | 1 | 1.575000  | 2.588144971  | -10.383761568 | 18.664729368  | 0 | 1 | 0 | # | ao |
| 2404 | 1 | 1 | 1.575000  | 5.176494971  | -14.838311568 | 18.664729368  | 0 | 1 | 0 | # | ao |
| 2405 | 1 | 2 | 0.425000  | 3.734650872  | -13.360932678 | -17.178884937 | 0 | 1 | 1 | # | ho |
| 2406 | 1 | 2 | 0.425000  | 1.146300872  | -17.815482678 | -17.178884937 | 0 | 1 | 1 | # | ho |
| 2407 | 1 | 2 | 0.425000  | 1.442049128  | -13.366367322 | 17.178884937  | 0 | 1 | 0 | # | ho |
| 2408 | 1 | 2 | 0.425000  | 4.030399128  | -8.911817322  | 17.178884937  | 0 | 1 | 0 | # | ho |
| 2409 | 1 | 3 | -1.050000 | 0.981314655  | -16.140698519 | 17.631577932  | 0 | 1 | 0 | # | ob |
| 2410 | 1 | 3 | -1.050000 | 5.023517264  | -11.513103874 | 15.433153738  | 0 | 1 | 0 | # | ob |
| 2411 | 1 | 3 | -1.050000 | 3.570244487  | -15.044550680 | 17.631368622  | 0 | 1 | 0 | # | ob |
| 2412 | 1 | 3 | -1.050000 | 2.434839092  | -10.769489700 | 15.431920289  | 0 | 1 | 0 | # | ob |
| 2413 | 1 | 3 | -1.050000 | 0.981894487  | -10.590000680 | 17.631368622  | 0 | 1 | 0 | # | ob |
| 2414 | 1 | 3 | -1.050000 | 1.606455513  | -11.682749320 | -17.631368622 | 0 | 1 | 1 | # | ob |
| 2415 | 1 | 3 | -1.050000 | 5.023189092  | -15.224039700 | 15.431920289  | 0 | 1 | 0 | # | ob |
| 2416 | 1 | 3 | -1.050000 | 1.607035345  | -15.041151481 | -17.631577932 | 0 | 1 | 1 | # | ob |
| 2417 | 1 | 3 | -1.050000 | 2.741532736  | -10.759646126 | -15.433153738 | 0 | 1 | 1 | # | ob |
| 2418 | 1 | 3 | -1.050000 | 4.195385345  | -10.586601481 | -17.631577932 | 0 | 1 | 1 | # | ob |
| 2419 | 1 | 3 | -1.050000 | 0.153182736  | -15.214196126 | -15.433153738 | 0 | 1 | 1 | # | ob |
| 2420 | 1 | 3 | -1.050000 | 2.741860908  | -15.957810300 | -15.431920289 | 0 | 1 | 1 | # | ob |
| 2421 | 1 | 4 | -0.950000 | 1.999257657  | -17.817259004 | -17.652417115 | 0 | 1 | 1 | # | oh |
| 2422 | 1 | 3 | -1.050000 | 4.667081651  | -17.814223030 | -15.603517583 | 0 | 1 | 1 | # | ob |
| 2423 | 1 | 4 | -0.950000 | 4.587607657  | -13.362709004 | -17.652417115 | 0 | 1 | 1 | # | oh |
| 2424 | 1 | 3 | -1.050000 | 2.078731651  | -13.359673030 | -15.603517583 | 0 | 1 | 1 | # | ob |
| 2425 | 1 | 4 | -0.950000 | 3.177442343  | -8.910040996  | 17.652417115  | 0 | 1 | 0 | # | oh |
| 2426 | 1 | 3 | -1.050000 | 0.509618349  | -8.913076970  | 15.603517583  | 0 | 1 | 0 | # | ob |
| 2427 | 1 | 4 | -0.950000 | 0.589092343  | -13.364590996 | 17.652417115  | 0 | 1 | 0 | # | oh |
| 2428 | 1 | 3 | -1.050000 | 3.097968349  | -13.367626970 | 15.603517583  | 0 | 1 | 0 | # | ob |
| 2429 | 1 | 3 | -1.050000 | 4.194805513  | -16.137299320 | -17.631368622 | 0 | 1 | 1 | # | ob |
| 2430 | 1 | 3 | -1.050000 | 0.153510908  | -11.503260300 | -15.431920289 | 0 | 1 | 1 | # | ob |
| 2431 | 1 | 3 | -1.050000 | 3.569664655  | -11.686148519 | 17.631577932  | 0 | 1 | 0 | # | ob |
| 2432 | 1 | 3 | -1.050000 | 2.435167264  | -15.967653874 | 15.433153738  | 0 | 1 | 0 | # | ob |
| 2433 | 1 | 5 | 2.100000  | 4.222997014  | -16.291080796 | -16.002222830 | 0 | 1 | 1 | # | st |
| 2434 | 1 | 5 | 2.100000  | 3.542027774  | -11.844829218 | 16.003201903  | 0 | 1 | 0 | # | st |
| 2435 | 1 | 5 | 2.100000  | 0.953702986  | -10.436219204 | 16.002222830  | 0 | 1 | 0 | # | st |
| 2436 | 1 | 5 | 2.100000  | 3.542052986  | -14.890769204 | 16.002222830  | 0 | 1 | 0 | # | st |
| 2437 | 1 | 5 | 2.100000  | 4.223022226  | -10.427920782 | -16.003201903 | 0 | 1 | 1 | # | st |
| 2438 | 1 | 5 | 2.100000  | 1.634672226  | -14.882470782 | -16.003201903 | 0 | 1 | 1 | # | st |
| 2439 | 1 | 5 | 2.100000  | 1.634647014  | -11.836530796 | -16.002222830 | 0 | 1 | 1 | # | st |
| 2440 | 1 | 5 | 2.100000  | 0.953677774  | -16.299379218 | 16.003201903  | 0 | 1 | 0 | # | st |
| 2441 | 1 | 1 | 1.575000  | 7.765255029  | -16.343538432 | -18.664729368 | 0 | 1 | 1 | # | ao |
| 2442 | 1 | 1 | 1.575000  | 5.176905029  | -11.888988432 | -18.664729368 | 0 | 1 | 1 | # | ao |
| 2443 | 1 | 1 | 1.575000  | 7.764844971  | -10.383761568 | 18.664729368  | 0 | 1 | 0 | # | ao |
| 2444 | 1 | 1 | 1.575000  | 10.353194971 | -14.838311568 | 18.664729368  | 0 | 1 | 0 | # | ao |
| 2445 | 1 | 2 | 0.425000  | 8.911350872  | -13.360932678 | -17.178884937 | 0 | 1 | 1 | # | ho |
| 2446 | 1 | 2 | 0.425000  | 6.323000872  | -17.815482678 | -17.178884937 | 0 | 1 | 1 | # | ho |
| 2447 | 1 | 2 | 0.425000  | 6.618749128  | -13.366367322 | 17.178884937  | 0 | 1 | 0 | # | ho |
| 2448 | 1 | 2 | 0.425000  | 9.207099128  | -8.911817322  | 17.178884937  | 0 | 1 | 0 | # | ho |
| 2449 | 1 | 3 | -1.050000 | 6.158014655  | -16.140698519 | 17.631577932  | 0 | 1 | 0 | # | ob |
| 2450 | 1 | 3 | -1.050000 | 10.200217264 | -11.513103874 | 15.433153738  | 0 | 1 | 0 | # | ob |
| 2451 | 1 | 3 | -1.050000 | 8.746944487  | -15.044550680 | 17.631368622  | 0 | 1 | 0 | # | ob |
| 2452 | 1 | 3 | -1.050000 | 7.611539092  | -10.769489700 | 15.431920289  | 0 | 1 | 0 | # | ob |
| 2453 | 1 | 3 | -1.050000 | 6.158594487  | -10.590000680 | 17.631368622  | 0 | 1 | 0 | # | ob |
| 2454 | 1 | 3 | -1.050000 | 6.783155513  | -11.682749320 | -17.631368622 | 0 | 1 | 1 | # | ob |
| 2455 | 1 | 3 | -1.050000 | 10.199889092 | -15.224039700 | 15.431920289  | 0 | 1 | 0 | # | ob |
| 2456 | 1 | 3 | -1.050000 | 6.783735345  | -15.041151481 | -17.631577932 | 0 | 1 | 1 | # | ob |
| 2457 | 1 | 3 | -1.050000 | 7.918232736  | -10.759646126 | -15.433153738 | 0 | 1 | 1 | # | ob |
| 2458 | 1 | 3 | -1.050000 | 9.372085345  | -10.586601481 | -17.631577932 | 0 | 1 | 1 | # | ob |

|      |   |   |           |               |               |               |   |   |   |   |    |
|------|---|---|-----------|---------------|---------------|---------------|---|---|---|---|----|
| 2459 | 1 | 3 | -1.050000 | 5.329882736   | -15.214196126 | -15.433153738 | 0 | 1 | 1 | # | ob |
| 2460 | 1 | 3 | -1.050000 | 7.918560908   | -15.957810300 | -15.431920289 | 0 | 1 | 1 | # | ob |
| 2461 | 1 | 4 | -0.950000 | 7.175957657   | -17.817259004 | -17.652417115 | 0 | 1 | 1 | # | oh |
| 2462 | 1 | 3 | -1.050000 | 9.843781651   | -17.814223030 | -15.603517583 | 0 | 1 | 1 | # | ob |
| 2463 | 1 | 4 | -0.950000 | 9.764307657   | -13.362709004 | -17.652417115 | 0 | 1 | 1 | # | oh |
| 2464 | 1 | 3 | -1.050000 | 7.255431651   | -13.359673030 | -15.603517583 | 0 | 1 | 1 | # | ob |
| 2465 | 1 | 4 | -0.950000 | 8.354142343   | -8.910040996  | 17.652417115  | 0 | 1 | 0 | # | oh |
| 2466 | 1 | 3 | -1.050000 | 5.686318349   | -8.913076970  | 15.603517583  | 0 | 1 | 0 | # | ob |
| 2467 | 1 | 4 | -0.950000 | 5.765792343   | -13.364590996 | 17.652417115  | 0 | 1 | 0 | # | oh |
| 2468 | 1 | 3 | -1.050000 | 8.274668349   | -13.367626970 | 15.603517583  | 0 | 1 | 0 | # | ob |
| 2469 | 1 | 3 | -1.050000 | 9.371505513   | -16.137299320 | -17.631368622 | 0 | 1 | 1 | # | ob |
| 2470 | 1 | 3 | -1.050000 | 5.330210908   | -11.503260300 | -15.431920289 | 0 | 1 | 1 | # | ob |
| 2471 | 1 | 3 | -1.050000 | 8.746364655   | -11.686148519 | 17.631577932  | 0 | 1 | 0 | # | ob |
| 2472 | 1 | 3 | -1.050000 | 7.611867264   | -15.967653874 | 15.433153738  | 0 | 1 | 0 | # | ob |
| 2473 | 1 | 5 | 2.100000  | 9.399697014   | -16.291080796 | -16.002222830 | 0 | 1 | 1 | # | st |
| 2474 | 1 | 5 | 2.100000  | 8.718727774   | -11.844829218 | 16.003201903  | 0 | 1 | 0 | # | st |
| 2475 | 1 | 5 | 2.100000  | 6.130402986   | -10.436219204 | 16.002222830  | 0 | 1 | 0 | # | st |
| 2476 | 1 | 5 | 2.100000  | 8.718752986   | -14.890769204 | 16.002222830  | 0 | 1 | 0 | # | st |
| 2477 | 1 | 5 | 2.100000  | 9.399722226   | -10.427920782 | -16.003201903 | 0 | 1 | 1 | # | st |
| 2478 | 1 | 5 | 2.100000  | 6.811372226   | -14.882470782 | -16.003201903 | 0 | 1 | 1 | # | st |
| 2479 | 1 | 5 | 2.100000  | 6.811347014   | -11.836530796 | -16.002222830 | 0 | 1 | 1 | # | st |
| 2480 | 1 | 5 | 2.100000  | 6.130377774   | -16.299379218 | 16.003201903  | 0 | 1 | 0 | # | st |
| 2481 | 1 | 1 | 1.575000  | 12.941955029  | -16.343538432 | -18.664729368 | 0 | 1 | 1 | # | ao |
| 2482 | 1 | 1 | 1.575000  | 10.353605029  | -11.888988432 | -18.664729368 | 0 | 1 | 1 | # | ao |
| 2483 | 1 | 1 | 1.575000  | 12.941544971  | -10.383761568 | 18.664729368  | 0 | 1 | 0 | # | ao |
| 2484 | 1 | 1 | 1.575000  | 15.529894971  | -14.838311568 | 18.664729368  | 0 | 1 | 0 | # | ao |
| 2485 | 1 | 2 | 0.425000  | 14.088050872  | -13.360932678 | -17.178884937 | 0 | 1 | 1 | # | ho |
| 2486 | 1 | 2 | 0.425000  | 11.499700872  | -17.815482678 | -17.178884937 | 0 | 1 | 1 | # | ho |
| 2487 | 1 | 2 | 0.425000  | 11.795449128  | -13.366367322 | 17.178884937  | 0 | 1 | 0 | # | ho |
| 2488 | 1 | 2 | 0.425000  | 14.383799128  | -8.911817322  | 17.178884937  | 0 | 1 | 0 | # | ho |
| 2489 | 1 | 3 | -1.050000 | 11.334714655  | -16.140698519 | 17.631577932  | 0 | 1 | 0 | # | ob |
| 2490 | 1 | 3 | -1.050000 | 15.376917264  | -11.513103874 | 15.433153738  | 0 | 1 | 0 | # | ob |
| 2491 | 1 | 3 | -1.050000 | 13.923644487  | -15.044550680 | 17.631368622  | 0 | 1 | 0 | # | ob |
| 2492 | 1 | 3 | -1.050000 | 12.788239092  | -10.769489700 | 15.431920289  | 0 | 1 | 0 | # | ob |
| 2493 | 1 | 3 | -1.050000 | 11.335294487  | -10.590000680 | 17.631368622  | 0 | 1 | 0 | # | ob |
| 2494 | 1 | 3 | -1.050000 | 11.959855513  | -11.682749320 | -17.631368622 | 0 | 1 | 1 | # | ob |
| 2495 | 1 | 3 | -1.050000 | 15.376589092  | -15.224039700 | 15.431920289  | 0 | 1 | 0 | # | ob |
| 2496 | 1 | 3 | -1.050000 | 11.960435345  | -15.041151481 | -17.631577932 | 0 | 1 | 1 | # | ob |
| 2497 | 1 | 3 | -1.050000 | 13.094932736  | -10.759646126 | -15.433153738 | 0 | 1 | 1 | # | ob |
| 2498 | 1 | 3 | -1.050000 | 14.548785345  | -10.586601481 | -17.631577932 | 0 | 1 | 1 | # | ob |
| 2499 | 1 | 3 | -1.050000 | 10.506582736  | -15.214196126 | -15.433153738 | 0 | 1 | 1 | # | ob |
| 2500 | 1 | 3 | -1.050000 | 13.095260908  | -15.957810300 | -15.431920289 | 0 | 1 | 1 | # | ob |
| 2501 | 1 | 4 | -0.950000 | 12.352657657  | -17.817259004 | -17.652417115 | 0 | 1 | 1 | # | oh |
| 2502 | 1 | 3 | -1.050000 | 15.020481651  | -17.814223030 | -15.603517583 | 0 | 1 | 1 | # | ob |
| 2503 | 1 | 4 | -0.950000 | 14.941007657  | -13.362709004 | -17.652417115 | 0 | 1 | 1 | # | oh |
| 2504 | 1 | 3 | -1.050000 | 12.432131651  | -13.359673030 | -15.603517583 | 0 | 1 | 1 | # | ob |
| 2505 | 1 | 4 | -0.950000 | 13.530842343  | -8.910040996  | 17.652417115  | 0 | 1 | 0 | # | oh |
| 2506 | 1 | 3 | -1.050000 | 10.863018349  | -8.913076970  | 15.603517583  | 0 | 1 | 0 | # | ob |
| 2507 | 1 | 4 | -0.950000 | 10.942492343  | -13.364590996 | 17.652417115  | 0 | 1 | 0 | # | oh |
| 2508 | 1 | 3 | -1.050000 | 13.451368349  | -13.367626970 | 15.603517583  | 0 | 1 | 0 | # | ob |
| 2509 | 1 | 3 | -1.050000 | 14.548205513  | -16.137299320 | -17.631368622 | 0 | 1 | 1 | # | ob |
| 2510 | 1 | 3 | -1.050000 | 10.506910908  | -11.503260300 | -15.431920289 | 0 | 1 | 1 | # | ob |
| 2511 | 1 | 3 | -1.050000 | 13.923064655  | -11.686148519 | 17.631577932  | 0 | 1 | 0 | # | ob |
| 2512 | 1 | 3 | -1.050000 | 12.788567264  | -15.967653874 | 15.433153738  | 0 | 1 | 0 | # | ob |
| 2513 | 1 | 5 | 2.100000  | 14.576397014  | -16.291080796 | -16.002222830 | 0 | 1 | 1 | # | st |
| 2514 | 1 | 5 | 2.100000  | 13.895427774  | -11.844829218 | 16.003201903  | 0 | 1 | 0 | # | st |
| 2515 | 1 | 5 | 2.100000  | 11.307102986  | -10.436219204 | 16.002222830  | 0 | 1 | 0 | # | st |
| 2516 | 1 | 5 | 2.100000  | 13.895452986  | -14.890769204 | 16.002222830  | 0 | 1 | 0 | # | st |
| 2517 | 1 | 5 | 2.100000  | 14.576422226  | -10.427920782 | -16.003201903 | 0 | 1 | 1 | # | st |
| 2518 | 1 | 5 | 2.100000  | 11.988072226  | -14.882470782 | -16.003201903 | 0 | 1 | 1 | # | st |
| 2519 | 1 | 5 | 2.100000  | 11.988047014  | -11.836530796 | -16.002222830 | 0 | 1 | 1 | # | st |
| 2520 | 1 | 5 | 2.100000  | 11.307077774  | -16.299379218 | 16.003201903  | 0 | 1 | 0 | # | st |
| 2521 | 1 | 1 | 1.575000  | -12.941544971 | -16.343538432 | -18.664729368 | 1 | 1 | 1 | # | ao |
| 2522 | 1 | 1 | 1.575000  | -15.529894971 | -11.888988432 | -18.664729368 | 1 | 1 | 1 | # | ao |
| 2523 | 1 | 1 | 1.575000  | -12.941955029 | -10.383761568 | 18.664729368  | 1 | 1 | 0 | # | ao |
| 2524 | 1 | 1 | 1.575000  | -10.353605029 | -14.838311568 | 18.664729368  | 1 | 1 | 0 | # | ao |
| 2525 | 1 | 2 | 0.425000  | -11.795449128 | -13.360932678 | -17.178884937 | 1 | 1 | 1 | # | ho |
| 2526 | 1 | 2 | 0.425000  | -14.383799128 | -17.815482678 | -17.178884937 | 1 | 1 | 1 | # | ho |
| 2527 | 1 | 2 | 0.425000  | -14.088050872 | -13.366367322 | 17.178884937  | 1 | 1 | 0 | # | ho |
| 2528 | 1 | 2 | 0.425000  | -11.499700872 | -8.911817322  | 17.178884937  | 1 | 1 | 0 | # | ho |
| 2529 | 1 | 3 | -1.050000 | -14.548785345 | -16.140698519 | 17.631577932  | 1 | 1 | 0 | # | ob |
| 2530 | 1 | 3 | -1.050000 | -10.506582736 | -11.513103874 | 15.433153738  | 1 | 1 | 0 | # | ob |
| 2531 | 1 | 3 | -1.050000 | -11.959855513 | -15.044550680 | 17.631368622  | 1 | 1 | 0 | # | ob |
| 2532 | 1 | 3 | -1.050000 | -13.095260908 | -10.769489700 | 15.431920289  | 1 | 1 | 0 | # | ob |
| 2533 | 1 | 3 | -1.050000 | -14.548205513 | -10.590000680 | 17.631368622  | 1 | 1 | 0 | # | ob |
| 2534 | 1 | 3 | -1.050000 | -13.923644487 | -11.682749320 | -17.631368622 | 1 | 1 | 1 | # | ob |
| 2535 | 1 | 3 | -1.050000 | -10.506910908 | -15.224039700 | 15.431920289  | 1 | 1 | 0 | # | ob |
| 2536 | 1 | 3 | -1.050000 | -13.923064655 | -15.041151481 | -17.631577932 | 1 | 1 | 1 | # | ob |
| 2537 | 1 | 3 | -1.050000 | -12.788567264 | -10.759646126 | -15.433153738 | 1 | 1 | 1 | # | ob |
| 2538 | 1 | 3 | -1.050000 | -11.334714655 | -10.586601481 | -17.631577932 | 1 | 1 | 1 | # | ob |
| 2539 | 1 | 3 | -1.050000 | -15.376917264 | -15.214196126 | -15.433153738 | 1 | 1 | 1 | # | ob |
| 2540 | 1 | 3 | -1.050000 | -12.788239092 | -15.957810300 | -15.431920289 | 1 | 1 | 1 | # | ob |
| 2541 | 1 | 4 | -0.950000 | -13.530842343 | -17.817259004 | -17.652417115 | 1 | 1 | 1 | # | oh |
| 2542 | 1 | 3 | -1.050000 | -10.863018349 | -17.814223030 | -15.603517583 | 1 | 1 | 1 | # | ob |
| 2543 | 1 | 4 | -0.950000 | -10.942492343 | -13.362709004 | -17.652417115 | 1 | 1 | 1 | # | oh |
| 2544 | 1 | 3 | -1.050000 | -13.451368349 | -13.359673030 | -15.603517583 | 1 | 1 | 1 | # | ob |
| 2545 | 1 | 4 | -0.950000 | -12.352657657 | -8.910040996  | 17.652417115  | 1 | 1 | 0 | # | oh |
| 2546 | 1 | 3 | -1.050000 | -15.020481651 | -8.913076970  | 15.603517583  | 1 | 1 | 0 | # | ob |
| 2547 | 1 | 4 | -0.950000 | -14.941007657 | -13.364590996 | 17.652417115  | 1 | 1 | 0 | # | oh |
| 2548 | 1 | 3 | -1.050000 | -12.432131651 | -13.367626970 | 15.603517583  | 1 | 1 | 0 | # | ob |
| 2549 | 1 | 3 | -1.050000 | -11.335294487 | -16.137299320 | -17.631368622 | 1 | 1 | 1 | # | ob |
| 2550 | 1 | 3 | -1.050000 | -15.376589092 | -11.503260300 | -15.431920289 | 1 | 1 | 1 | # | ob |
| 2551 | 1 | 3 | -1.050000 | -11.960435345 | -11.686148519 | 17.631577932  | 1 | 1 | 0 | # | ob |

|      |   |   |           |               |               |               |   |   |   |   |    |
|------|---|---|-----------|---------------|---------------|---------------|---|---|---|---|----|
| 2552 | 1 | 3 | -1.050000 | -13.094932736 | -15.967653874 | 15.433153738  | 1 | 1 | 0 | # | ob |
| 2553 | 1 | 5 | 2.100000  | -11.307102986 | -16.291080796 | -16.002222830 | 1 | 1 | 1 | # | st |
| 2554 | 1 | 5 | 2.100000  | -11.988072226 | -11.844829218 | 16.003201903  | 1 | 1 | 0 | # | st |
| 2555 | 1 | 5 | 2.100000  | -14.576397014 | -10.436219204 | 16.002222830  | 1 | 1 | 0 | # | st |
| 2556 | 1 | 5 | 2.100000  | -11.988047014 | -14.890769204 | 16.002222830  | 1 | 1 | 0 | # | st |
| 2557 | 1 | 5 | 2.100000  | -11.307077774 | -10.427920782 | -16.003201903 | 1 | 1 | 1 | # | st |
| 2558 | 1 | 5 | 2.100000  | -13.895427774 | -14.882470782 | -16.003201903 | 1 | 1 | 1 | # | st |
| 2559 | 1 | 5 | 2.100000  | -13.895452986 | -11.836530796 | -16.002222830 | 1 | 1 | 1 | # | st |
| 2560 | 1 | 5 | 2.100000  | -14.576422226 | -16.299379218 | 16.003201903  | 1 | 1 | 0 | # | st |
| 2561 | 1 | 1 | 1.575000  | -7.764844971  | -16.343538432 | -18.664729368 | 1 | 1 | 1 | # | ao |
| 2562 | 1 | 1 | 1.575000  | -10.353194971 | -11.888988432 | -18.664729368 | 1 | 1 | 1 | # | ao |
| 2563 | 1 | 1 | 1.575000  | -7.765255029  | -10.383761568 | 18.664729368  | 1 | 1 | 0 | # | ao |
| 2564 | 1 | 1 | 1.575000  | -5.176905029  | -14.838311568 | 18.664729368  | 1 | 1 | 0 | # | ao |
| 2565 | 1 | 2 | 0.425000  | -6.618749128  | -13.360932678 | -17.178884937 | 1 | 1 | 1 | # | ho |
| 2566 | 1 | 2 | 0.425000  | -9.207099128  | -17.815482678 | -17.178884937 | 1 | 1 | 1 | # | ho |
| 2567 | 1 | 2 | 0.425000  | -8.911350872  | -13.366367322 | 17.178884937  | 1 | 1 | 0 | # | ho |
| 2568 | 1 | 2 | 0.425000  | -6.323000872  | -8.911817322  | 17.178884937  | 1 | 1 | 0 | # | ho |
| 2569 | 1 | 3 | -1.050000 | -9.372085345  | -16.140698519 | 17.631577932  | 1 | 1 | 0 | # | ob |
| 2570 | 1 | 3 | -1.050000 | -5.329882736  | -11.513103874 | 15.433153738  | 1 | 1 | 0 | # | ob |
| 2571 | 1 | 3 | -1.050000 | -6.783155513  | -15.044550680 | 17.631368622  | 1 | 1 | 0 | # | ob |
| 2572 | 1 | 3 | -1.050000 | -7.918560908  | -10.769489700 | 15.431920289  | 1 | 1 | 0 | # | ob |
| 2573 | 1 | 3 | -1.050000 | -9.371505513  | -10.590000680 | 17.631368622  | 1 | 1 | 0 | # | ob |
| 2574 | 1 | 3 | -1.050000 | -8.746944487  | -11.682749320 | -17.631368622 | 1 | 1 | 1 | # | ob |
| 2575 | 1 | 3 | -1.050000 | -5.330210908  | -15.224039700 | 15.431920289  | 1 | 1 | 0 | # | ob |
| 2576 | 1 | 3 | -1.050000 | -8.746364655  | -15.041151481 | -17.631577932 | 1 | 1 | 1 | # | ob |
| 2577 | 1 | 3 | -1.050000 | -7.611867264  | -10.759646126 | -15.433153738 | 1 | 1 | 1 | # | ob |
| 2578 | 1 | 3 | -1.050000 | -6.158014655  | -10.586601481 | -17.631577932 | 1 | 1 | 1 | # | ob |
| 2579 | 1 | 3 | -1.050000 | -10.200217264 | -15.214196126 | -15.433153738 | 1 | 1 | 1 | # | ob |
| 2580 | 1 | 3 | -1.050000 | -7.611539902  | -15.957810300 | -15.431920289 | 1 | 1 | 1 | # | ob |
| 2581 | 1 | 4 | -0.950000 | -8.354142343  | -17.817259004 | -17.652417115 | 1 | 1 | 1 | # | oh |
| 2582 | 1 | 3 | -1.050000 | -5.686318349  | -17.814223030 | -15.603517583 | 1 | 1 | 1 | # | ob |
| 2583 | 1 | 4 | -0.950000 | -5.765792343  | -13.362709004 | -17.652417115 | 1 | 1 | 1 | # | oh |
| 2584 | 1 | 3 | -1.050000 | -8.274668349  | -13.359673030 | -15.603517583 | 1 | 1 | 1 | # | ob |
| 2585 | 1 | 4 | -0.950000 | -7.175957657  | -8.910040996  | 17.652417115  | 1 | 1 | 0 | # | oh |
| 2586 | 1 | 3 | -1.050000 | -9.843781651  | -8.913076970  | 15.603517583  | 1 | 1 | 0 | # | ob |
| 2587 | 1 | 4 | -0.950000 | -9.764307657  | -13.364590996 | 17.652417115  | 1 | 1 | 0 | # | oh |
| 2588 | 1 | 3 | -1.050000 | -7.255431651  | -13.367626970 | 15.603517583  | 1 | 1 | 0 | # | ob |
| 2589 | 1 | 3 | -1.050000 | -6.158594487  | -16.137299320 | -17.631368622 | 1 | 1 | 1 | # | ob |
| 2590 | 1 | 3 | -1.050000 | -10.199889092 | -11.503260300 | -15.431920289 | 1 | 1 | 1 | # | ob |
| 2591 | 1 | 3 | -1.050000 | -6.783735345  | -11.686148519 | 17.631577932  | 1 | 1 | 0 | # | ob |
| 2592 | 1 | 3 | -1.050000 | -7.918232736  | -15.967653874 | 15.433153738  | 1 | 1 | 0 | # | ob |
| 2593 | 1 | 5 | 2.100000  | -6.130402986  | -16.291080796 | -16.002222830 | 1 | 1 | 1 | # | st |
| 2594 | 1 | 5 | 2.100000  | -6.811372226  | -11.844829218 | 16.003201903  | 1 | 1 | 0 | # | st |
| 2595 | 1 | 5 | 2.100000  | -9.399697014  | -10.436219204 | 16.002222830  | 1 | 1 | 0 | # | st |
| 2596 | 1 | 5 | 2.100000  | -6.811347014  | -14.890769204 | 16.002222830  | 1 | 1 | 0 | # | st |
| 2597 | 1 | 5 | 2.100000  | -6.130377774  | -10.427920782 | -16.003201903 | 1 | 1 | 1 | # | st |
| 2598 | 1 | 5 | 2.100000  | -8.718727774  | -14.882470782 | -16.003201903 | 1 | 1 | 1 | # | st |
| 2599 | 1 | 5 | 2.100000  | -8.718752986  | -11.836530796 | -16.002222830 | 1 | 1 | 1 | # | st |
| 2600 | 1 | 5 | 2.100000  | -9.399722226  | -16.299379218 | 16.003201903  | 1 | 1 | 0 | # | st |
| 2601 | 1 | 1 | 1.575000  | -2.588144971  | -16.343538432 | -18.664729368 | 1 | 1 | 1 | # | ao |
| 2602 | 1 | 1 | 1.575000  | -5.176494971  | -11.888988432 | -18.664729368 | 1 | 1 | 1 | # | ao |
| 2603 | 1 | 1 | 1.575000  | -2.588555029  | -10.383761568 | 18.664729368  | 1 | 1 | 0 | # | ao |
| 2604 | 1 | 1 | 1.575000  | -0.000205029  | -14.838311568 | 18.664729368  | 1 | 1 | 0 | # | ao |
| 2605 | 1 | 2 | 0.425000  | -1.442049128  | -13.360932678 | -17.178884937 | 1 | 1 | 1 | # | ho |
| 2606 | 1 | 2 | 0.425000  | -4.030399128  | -17.815482678 | -17.178884937 | 1 | 1 | 1 | # | ho |
| 2607 | 1 | 2 | 0.425000  | -3.734650872  | -13.366367322 | 17.178884937  | 1 | 1 | 0 | # | ho |
| 2608 | 1 | 2 | 0.425000  | -1.146300872  | -8.911817322  | 17.178884937  | 1 | 1 | 0 | # | ho |
| 2609 | 1 | 3 | -1.050000 | -4.195385345  | -16.140698519 | 17.631577932  | 1 | 1 | 0 | # | ob |
| 2610 | 1 | 3 | -1.050000 | -0.153182736  | -11.513103874 | 15.433153738  | 1 | 1 | 0 | # | ob |
| 2611 | 1 | 3 | -1.050000 | -1.606455513  | -15.044550680 | 17.631368622  | 1 | 1 | 0 | # | ob |
| 2612 | 1 | 3 | -1.050000 | -2.741860908  | -10.769489700 | 15.431920289  | 1 | 1 | 0 | # | ob |
| 2613 | 1 | 3 | -1.050000 | -4.194805513  | -10.590000680 | 17.631368622  | 1 | 1 | 0 | # | ob |
| 2614 | 1 | 3 | -1.050000 | -3.570244487  | -11.682749320 | -17.631368622 | 1 | 1 | 1 | # | ob |
| 2615 | 1 | 3 | -1.050000 | -0.153510908  | -15.224039700 | 15.431920289  | 1 | 1 | 0 | # | ob |
| 2616 | 1 | 3 | -1.050000 | -3.569664655  | -15.041151481 | -17.631577932 | 1 | 1 | 1 | # | ob |
| 2617 | 1 | 3 | -1.050000 | -2.435167264  | -10.759646126 | -15.433153738 | 1 | 1 | 1 | # | ob |
| 2618 | 1 | 3 | -1.050000 | -0.981314655  | -10.586601481 | -17.631577932 | 1 | 1 | 1 | # | ob |
| 2619 | 1 | 3 | -1.050000 | -5.023517264  | -15.214196126 | -15.433153738 | 1 | 1 | 1 | # | ob |
| 2620 | 1 | 3 | -1.050000 | -2.434839092  | -15.957810300 | -15.431920289 | 1 | 1 | 1 | # | ob |
| 2621 | 1 | 4 | -0.950000 | -3.17742343   | -17.817259004 | -17.652417115 | 1 | 1 | 1 | # | oh |
| 2622 | 1 | 3 | -1.050000 | -0.509618349  | -17.814223030 | -15.603517583 | 1 | 1 | 1 | # | ob |
| 2623 | 1 | 4 | -0.950000 | -0.589092343  | -13.362709004 | -17.652417115 | 1 | 1 | 1 | # | oh |
| 2624 | 1 | 3 | -1.050000 | -3.097968349  | -13.359673030 | -15.603517583 | 1 | 1 | 1 | # | ob |
| 2625 | 1 | 4 | -0.950000 | -1.999257657  | -8.910040996  | 17.652417115  | 1 | 1 | 0 | # | oh |
| 2626 | 1 | 3 | -1.050000 | -4.667081651  | -8.913076970  | 15.603517583  | 1 | 1 | 0 | # | ob |
| 2627 | 1 | 4 | -0.950000 | -4.587607657  | -13.364590996 | 17.652417115  | 1 | 1 | 0 | # | oh |
| 2628 | 1 | 3 | -1.050000 | -2.078731651  | -13.367626970 | 15.603517583  | 1 | 1 | 0 | # | ob |
| 2629 | 1 | 3 | -1.050000 | -0.981894487  | -16.137299320 | -17.631368622 | 1 | 1 | 1 | # | ob |
| 2630 | 1 | 3 | -1.050000 | -5.023189092  | -11.503260300 | -15.431920289 | 1 | 1 | 1 | # | ob |
| 2631 | 1 | 3 | -1.050000 | -1.607035345  | -11.686148519 | 17.631577932  | 1 | 1 | 0 | # | ob |
| 2632 | 1 | 3 | -1.050000 | -2.741532736  | -15.967653874 | 15.433153738  | 1 | 1 | 0 | # | ob |
| 2633 | 1 | 5 | 2.100000  | -0.953702986  | -16.291080796 | -16.002222830 | 1 | 1 | 1 | # | st |
| 2634 | 1 | 5 | 2.100000  | -1.634672226  | -11.844829218 | 16.003201903  | 1 | 1 | 0 | # | st |
| 2635 | 1 | 5 | 2.100000  | -4.222997014  | -10.436219204 | 16.002222830  | 1 | 1 | 0 | # | st |
| 2636 | 1 | 5 | 2.100000  | -1.634647014  | -14.890769204 | 16.002222830  | 1 | 1 | 0 | # | st |
| 2637 | 1 | 5 | 2.100000  | -0.953677774  | -10.427920782 | -16.003201903 | 1 | 1 | 1 | # | st |
| 2638 | 1 | 5 | 2.100000  | -3.542027774  | -14.882470782 | -16.003201903 | 1 | 1 | 1 | # | st |
| 2639 | 1 | 5 | 2.100000  | -3.542052986  | -11.836530796 | -16.002222830 | 1 | 1 | 1 | # | st |
| 2640 | 1 | 5 | 2.100000  | -4.223022226  | -16.299379218 | 16.003201903  | 1 | 1 | 0 | # | st |
| 2641 | 1 | 1 | 1.575000  | 2.588555029   | -7.434438432  | -18.664729368 | 0 | 1 | 1 | # | ao |
| 2642 | 1 | 1 | 1.575000  | 0.000205029   | -2.979888432  | -18.664729368 | 0 | 1 | 1 | # | ao |
| 2643 | 1 | 1 | 1.575000  | 2.588144971   | -1.474661568  | 18.664729368  | 0 | 1 | 0 | # | ao |
| 2644 | 1 | 1 | 1.575000  | 5.176494971   | -5.929211568  | 18.664729368  | 0 | 1 | 0 | # | ao |

|      |   |   |           |              |              |               |   |   |   |   |    |
|------|---|---|-----------|--------------|--------------|---------------|---|---|---|---|----|
| 2645 | 1 | 2 | 0.425000  | 3.734650872  | -4.451832678 | -17.178884937 | 0 | 1 | 1 | # | ho |
| 2646 | 1 | 2 | 0.425000  | 1.146300872  | -8.906382678 | -17.178884937 | 0 | 1 | 1 | # | ho |
| 2647 | 1 | 2 | 0.425000  | 1.442049128  | -4.457267322 | 17.178884937  | 0 | 1 | 0 | # | ho |
| 2648 | 1 | 2 | 0.425000  | 4.030399128  | -0.002717322 | 17.178884937  | 0 | 1 | 0 | # | ho |
| 2649 | 1 | 3 | -1.050000 | 0.981314655  | -7.231598519 | 17.631577932  | 0 | 1 | 0 | # | ob |
| 2650 | 1 | 3 | -1.050000 | 5.023517264  | -2.604003874 | 15.433153738  | 0 | 1 | 0 | # | ob |
| 2651 | 1 | 3 | -1.050000 | 3.570244487  | -6.135450680 | 17.631368622  | 0 | 1 | 0 | # | ob |
| 2652 | 1 | 3 | -1.050000 | 2.434839092  | -1.860389700 | 15.431920289  | 0 | 1 | 0 | # | ob |
| 2653 | 1 | 3 | -1.050000 | 0.981894487  | -1.680900680 | 17.631368622  | 0 | 1 | 0 | # | ob |
| 2654 | 1 | 3 | -1.050000 | 1.606455513  | -2.773649320 | -17.631368622 | 0 | 1 | 1 | # | ob |
| 2655 | 1 | 3 | -1.050000 | 5.023189092  | -6.314939700 | 15.431920289  | 0 | 1 | 0 | # | ob |
| 2656 | 1 | 3 | -1.050000 | 1.607035345  | -6.132051481 | -17.631577932 | 0 | 1 | 1 | # | ob |
| 2657 | 1 | 3 | -1.050000 | 2.741532736  | -1.850546126 | -15.433153738 | 0 | 1 | 1 | # | ob |
| 2658 | 1 | 3 | -1.050000 | 4.195385345  | -1.677501481 | -17.631577932 | 0 | 1 | 1 | # | ob |
| 2659 | 1 | 3 | -1.050000 | 0.153182736  | -6.305096126 | -15.433153738 | 0 | 1 | 1 | # | ob |
| 2660 | 1 | 3 | -1.050000 | 2.741860908  | -7.048710300 | -15.431920289 | 0 | 1 | 1 | # | ob |
| 2661 | 1 | 4 | -0.950000 | 1.999257657  | -8.908159004 | -17.652417115 | 0 | 1 | 1 | # | oh |
| 2662 | 1 | 3 | -1.050000 | 4.667081651  | -8.905123030 | -15.603517583 | 0 | 1 | 1 | # | ob |
| 2663 | 1 | 4 | -0.950000 | 4.587607657  | -4.453609004 | -17.652417115 | 0 | 1 | 1 | # | oh |
| 2664 | 1 | 3 | -1.050000 | 2.078731651  | -4.450573030 | -15.603517583 | 0 | 1 | 1 | # | ob |
| 2665 | 1 | 4 | -0.950000 | 3.17742343   | -0.000940996 | 17.652417115  | 0 | 1 | 0 | # | oh |
| 2666 | 1 | 3 | -1.050000 | 0.509618349  | -0.003976970 | 15.603517583  | 0 | 1 | 0 | # | ob |
| 2667 | 1 | 4 | -0.950000 | 0.589092343  | -4.455490996 | 17.652417115  | 0 | 1 | 0 | # | oh |
| 2668 | 1 | 3 | -1.050000 | 3.097968349  | -4.458526970 | 15.603517583  | 0 | 1 | 0 | # | ob |
| 2669 | 1 | 3 | -1.050000 | 4.194805513  | -7.228199320 | -17.631368622 | 0 | 1 | 1 | # | ob |
| 2670 | 1 | 3 | -1.050000 | 0.153510908  | -2.594160300 | -15.431920289 | 0 | 1 | 1 | # | ob |
| 2671 | 1 | 3 | -1.050000 | 3.569664655  | -2.777048519 | 17.631577932  | 0 | 1 | 0 | # | ob |
| 2672 | 1 | 3 | -1.050000 | 2.435167264  | -7.058553874 | 15.433153738  | 0 | 1 | 0 | # | ob |
| 2673 | 1 | 5 | 2.100000  | 4.222997014  | -7.381980796 | -16.002222830 | 0 | 1 | 1 | # | st |
| 2674 | 1 | 5 | 2.100000  | 3.542027774  | -2.935729218 | 16.003201903  | 0 | 1 | 0 | # | st |
| 2675 | 1 | 5 | 2.100000  | 0.953702986  | -1.527119204 | 16.002222830  | 0 | 1 | 0 | # | st |
| 2676 | 1 | 5 | 2.100000  | 3.542052986  | -5.981669204 | 16.002222830  | 0 | 1 | 0 | # | st |
| 2677 | 1 | 5 | 2.100000  | 4.223022226  | -1.518820782 | -16.003201903 | 0 | 1 | 1 | # | st |
| 2678 | 1 | 5 | 2.100000  | 1.634672226  | -5.973370782 | -16.003201903 | 0 | 1 | 1 | # | st |
| 2679 | 1 | 5 | 2.100000  | 1.634647014  | -2.927430796 | -16.002222830 | 0 | 1 | 1 | # | st |
| 2680 | 1 | 5 | 2.100000  | 0.953677774  | -7.390279218 | 16.003201903  | 0 | 1 | 0 | # | st |
| 2681 | 1 | 1 | 1.575000  | 7.765255029  | -7.434438432 | -18.664729368 | 0 | 1 | 1 | # | ao |
| 2682 | 1 | 1 | 1.575000  | 5.176905029  | -2.979888432 | -18.664729368 | 0 | 1 | 1 | # | ao |
| 2683 | 1 | 1 | 1.575000  | 7.764844971  | -1.474661568 | 18.664729368  | 0 | 1 | 0 | # | ao |
| 2684 | 1 | 1 | 1.575000  | 10.353194971 | -5.929211568 | 18.664729368  | 0 | 1 | 0 | # | ao |
| 2685 | 1 | 2 | 0.425000  | 8.911350872  | -4.451832678 | -17.178884937 | 0 | 1 | 1 | # | ho |
| 2686 | 1 | 2 | 0.425000  | 6.323000872  | -8.906382678 | -17.178884937 | 0 | 1 | 1 | # | ho |
| 2687 | 1 | 2 | 0.425000  | 6.618749128  | -4.457267322 | 17.178884937  | 0 | 1 | 0 | # | ho |
| 2688 | 1 | 2 | 0.425000  | 9.207099128  | -0.002717322 | 17.178884937  | 0 | 1 | 0 | # | ho |
| 2689 | 1 | 3 | -1.050000 | 6.158014655  | -7.231598519 | 17.631577932  | 0 | 1 | 0 | # | ob |
| 2690 | 1 | 3 | -1.050000 | 10.200217264 | -2.604003874 | 15.433153738  | 0 | 1 | 0 | # | ob |
| 2691 | 1 | 3 | -1.050000 | 8.746944487  | -6.135450680 | 17.631368622  | 0 | 1 | 0 | # | ob |
| 2692 | 1 | 3 | -1.050000 | 7.611539092  | -1.860389700 | 15.431920289  | 0 | 1 | 0 | # | ob |
| 2693 | 1 | 3 | -1.050000 | 6.158594487  | -1.680900680 | 17.631368622  | 0 | 1 | 0 | # | ob |
| 2694 | 1 | 3 | -1.050000 | 6.783155513  | -2.773649320 | -17.631368622 | 0 | 1 | 1 | # | ob |
| 2695 | 1 | 3 | -1.050000 | 10.199889092 | -6.314939700 | 15.431920289  | 0 | 1 | 0 | # | ob |
| 2696 | 1 | 3 | -1.050000 | 6.783735345  | -6.132051481 | -17.631577932 | 0 | 1 | 1 | # | ob |
| 2697 | 1 | 3 | -1.050000 | 7.918232736  | -1.850546126 | -15.433153738 | 0 | 1 | 1 | # | ob |
| 2698 | 1 | 3 | -1.050000 | 9.372085345  | -1.677501481 | -17.631577932 | 0 | 1 | 1 | # | ob |
| 2699 | 1 | 3 | -1.050000 | 5.329882736  | -6.305096126 | -15.433153738 | 0 | 1 | 1 | # | ob |
| 2700 | 1 | 3 | -1.050000 | 7.918560908  | -7.048710300 | -15.431920289 | 0 | 1 | 1 | # | ob |
| 2701 | 1 | 4 | -0.950000 | 7.175957657  | -8.908159004 | -17.652417115 | 0 | 1 | 1 | # | oh |
| 2702 | 1 | 3 | -1.050000 | 9.843781651  | -8.905123030 | -15.603517583 | 0 | 1 | 1 | # | ob |
| 2703 | 1 | 4 | -0.950000 | 9.764307657  | -4.453609004 | -17.652417115 | 0 | 1 | 1 | # | oh |
| 2704 | 1 | 3 | -1.050000 | 7.255431651  | -4.450573030 | -15.603517583 | 0 | 1 | 1 | # | ob |
| 2705 | 1 | 4 | -0.950000 | 8.354142343  | -0.000940996 | 17.652417115  | 0 | 1 | 0 | # | oh |
| 2706 | 1 | 3 | -1.050000 | 5.686318349  | -0.003976970 | 15.603517583  | 0 | 1 | 0 | # | ob |
| 2707 | 1 | 4 | -0.950000 | 5.765792343  | -4.455490996 | 17.652417115  | 0 | 1 | 0 | # | oh |
| 2708 | 1 | 3 | -1.050000 | 8.274668349  | -4.458526970 | 15.603517583  | 0 | 1 | 0 | # | ob |
| 2709 | 1 | 3 | -1.050000 | 9.371505513  | -7.228199320 | -17.631368622 | 0 | 1 | 1 | # | ob |
| 2710 | 1 | 3 | -1.050000 | 5.330210908  | -2.594160300 | -15.431920289 | 0 | 1 | 1 | # | ob |
| 2711 | 1 | 3 | -1.050000 | 8.746364655  | -2.777048519 | 17.631577932  | 0 | 1 | 0 | # | ob |
| 2712 | 1 | 3 | -1.050000 | 7.611867264  | -7.058553874 | 15.433153738  | 0 | 1 | 0 | # | ob |
| 2713 | 1 | 5 | 2.100000  | 9.399697014  | -7.381980796 | -16.002222830 | 0 | 1 | 1 | # | st |
| 2714 | 1 | 5 | 2.100000  | 8.718727774  | -2.935729218 | 16.003201903  | 0 | 1 | 0 | # | st |
| 2715 | 1 | 5 | 2.100000  | 6.130402986  | -1.527119204 | 16.002222830  | 0 | 1 | 0 | # | st |
| 2716 | 1 | 5 | 2.100000  | 8.718752986  | -5.981669204 | 16.002222830  | 0 | 1 | 0 | # | st |
| 2717 | 1 | 5 | 2.100000  | 9.399722226  | -1.518820782 | -16.003201903 | 0 | 1 | 1 | # | st |
| 2718 | 1 | 5 | 2.100000  | 6.811372226  | -5.973370782 | -16.003201903 | 0 | 1 | 1 | # | st |
| 2719 | 1 | 5 | 2.100000  | 6.811347014  | -2.927430796 | -16.002222830 | 0 | 1 | 1 | # | st |
| 2720 | 1 | 5 | 2.100000  | 6.130377774  | -7.390279218 | 16.003201903  | 0 | 1 | 0 | # | st |
| 2721 | 1 | 1 | 1.575000  | 12.941955029 | -7.434438432 | -18.664729368 | 0 | 1 | 1 | # | ao |
| 2722 | 1 | 1 | 1.575000  | 10.353605029 | -2.979888432 | -18.664729368 | 0 | 1 | 1 | # | ao |
| 2723 | 1 | 1 | 1.575000  | 12.941544971 | -1.474661568 | 18.664729368  | 0 | 1 | 0 | # | ao |
| 2724 | 1 | 1 | 1.575000  | 15.529894971 | -5.929211568 | 18.664729368  | 0 | 1 | 0 | # | ao |
| 2725 | 1 | 2 | 0.425000  | 14.088050872 | -4.451832678 | -17.178884937 | 0 | 1 | 1 | # | ho |
| 2726 | 1 | 2 | 0.425000  | 11.499700872 | -8.906382678 | -17.178884937 | 0 | 1 | 1 | # | ho |
| 2727 | 1 | 2 | 0.425000  | 11.795449128 | -4.457267322 | 17.178884937  | 0 | 1 | 0 | # | ho |
| 2728 | 1 | 2 | 0.425000  | 14.383799128 | -0.002717322 | 17.178884937  | 0 | 1 | 0 | # | ho |
| 2729 | 1 | 3 | -1.050000 | 11.334714655 | -7.231598519 | 17.631577932  | 0 | 1 | 0 | # | ob |
| 2730 | 1 | 3 | -1.050000 | 15.376917264 | -2.604003874 | 15.433153738  | 0 | 1 | 0 | # | ob |
| 2731 | 1 | 3 | -1.050000 | 13.923644487 | -6.135450680 | 17.631368622  | 0 | 1 | 0 | # | ob |
| 2732 | 1 | 3 | -1.050000 | 12.788239092 | -1.860389700 | 15.431920289  | 0 | 1 | 0 | # | ob |
| 2733 | 1 | 3 | -1.050000 | 11.335294487 | -1.680900680 | 17.631368622  | 0 | 1 | 0 | # | ob |
| 2734 | 1 | 3 | -1.050000 | 11.959855513 | -2.773649320 | -17.631368622 | 0 | 1 | 1 | # | ob |
| 2735 | 1 | 3 | -1.050000 | 15.376589092 | -6.314939700 | 15.431920289  | 0 | 1 | 0 | # | ob |
| 2736 | 1 | 3 | -1.050000 | 11.960435345 | -6.132051481 | -17.631577932 | 0 | 1 | 1 | # | ob |
| 2737 | 1 | 3 | -1.050000 | 13.094932736 | -1.850546126 | -15.433153738 | 0 | 1 | 1 | # | ob |

|      |   |   |           |               |              |               |   |   |   |   |    |
|------|---|---|-----------|---------------|--------------|---------------|---|---|---|---|----|
| 2738 | 1 | 3 | -1.050000 | 14.548785345  | -1.677501481 | -17.631577932 | 0 | 1 | 1 | # | ob |
| 2739 | 1 | 3 | -1.050000 | 10.506582736  | -6.305096126 | -15.433153738 | 0 | 1 | 1 | # | ob |
| 2740 | 1 | 3 | -1.050000 | 13.095260908  | -7.048710300 | -15.431920289 | 0 | 1 | 1 | # | ob |
| 2741 | 1 | 4 | -0.950000 | 12.352657657  | -8.908159004 | -17.652417115 | 0 | 1 | 1 | # | oh |
| 2742 | 1 | 3 | -1.050000 | 15.020481651  | -8.905123030 | -15.603517583 | 0 | 1 | 1 | # | ob |
| 2743 | 1 | 4 | -0.950000 | 14.941007657  | -4.453609004 | -17.652417115 | 0 | 1 | 1 | # | oh |
| 2744 | 1 | 3 | -1.050000 | 12.432131651  | -4.450573030 | -15.603517583 | 0 | 1 | 1 | # | ob |
| 2745 | 1 | 4 | -0.950000 | 13.530842343  | -0.000940996 | 17.652417115  | 0 | 1 | 0 | # | oh |
| 2746 | 1 | 3 | -1.050000 | 10.863018349  | -0.003976970 | 15.603517583  | 0 | 1 | 0 | # | ob |
| 2747 | 1 | 4 | -0.950000 | 10.942492343  | -4.455490996 | 17.652417115  | 0 | 1 | 0 | # | oh |
| 2748 | 1 | 3 | -1.050000 | 13.451368349  | -4.458526970 | 15.603517583  | 0 | 1 | 0 | # | ob |
| 2749 | 1 | 3 | -1.050000 | 14.548205513  | -7.228199320 | -17.631368622 | 0 | 1 | 1 | # | ob |
| 2750 | 1 | 3 | -1.050000 | 10.506910908  | -2.594160300 | -15.431920289 | 0 | 1 | 1 | # | ob |
| 2751 | 1 | 3 | -1.050000 | 13.923064655  | -2.777048519 | 17.631577932  | 0 | 1 | 0 | # | ob |
| 2752 | 1 | 3 | -1.050000 | 12.788567264  | -7.058553874 | 15.433153738  | 0 | 1 | 0 | # | ob |
| 2753 | 1 | 5 | 2.100000  | 14.576397014  | -7.381980796 | -16.002222830 | 0 | 1 | 1 | # | st |
| 2754 | 1 | 5 | 2.100000  | 13.895427774  | -2.935729218 | 16.003201903  | 0 | 1 | 0 | # | st |
| 2755 | 1 | 5 | 2.100000  | 11.307102986  | -1.527119204 | 16.002222830  | 0 | 1 | 0 | # | st |
| 2756 | 1 | 5 | 2.100000  | 13.895452986  | -5.981669204 | 16.002222830  | 0 | 1 | 0 | # | st |
| 2757 | 1 | 5 | 2.100000  | 14.576422226  | -1.518820782 | -16.003201903 | 0 | 1 | 1 | # | st |
| 2758 | 1 | 5 | 2.100000  | 11.988072226  | -5.973370782 | -16.003201903 | 0 | 1 | 1 | # | st |
| 2759 | 1 | 5 | 2.100000  | 11.988047014  | -2.927430796 | -16.002222830 | 0 | 1 | 1 | # | st |
| 2760 | 1 | 5 | 2.100000  | 11.307077774  | -7.390279218 | 16.003201903  | 0 | 1 | 0 | # | st |
| 2761 | 1 | 1 | 1.575000  | -12.941544971 | -7.434438432 | -18.664729368 | 1 | 1 | 1 | # | ao |
| 2762 | 1 | 1 | 1.575000  | -15.529894971 | -2.979888432 | -18.664729368 | 1 | 1 | 1 | # | ao |
| 2763 | 1 | 1 | 1.575000  | -12.941955029 | -1.474661568 | 18.664729368  | 1 | 1 | 0 | # | ao |
| 2764 | 1 | 1 | 1.575000  | -10.353605029 | -5.929211568 | 18.664729368  | 1 | 1 | 0 | # | ao |
| 2765 | 1 | 2 | 0.425000  | -11.795449128 | -4.451832678 | -17.178884937 | 1 | 1 | 1 | # | ho |
| 2766 | 1 | 2 | 0.425000  | -14.383799128 | -8.906382678 | -17.178884937 | 1 | 1 | 1 | # | ho |
| 2767 | 1 | 2 | 0.425000  | -14.088050872 | -4.457267322 | 17.178884937  | 1 | 1 | 0 | # | ho |
| 2768 | 1 | 2 | 0.425000  | -11.499700872 | -0.002717322 | 17.178884937  | 1 | 1 | 0 | # | ho |
| 2769 | 1 | 3 | -1.050000 | -14.548785345 | -7.231598519 | 17.631577932  | 1 | 1 | 0 | # | ob |
| 2770 | 1 | 3 | -1.050000 | -10.506582736 | -2.604003874 | 15.433153738  | 1 | 1 | 0 | # | ob |
| 2771 | 1 | 3 | -1.050000 | -11.959855513 | -6.135450680 | 17.631368622  | 1 | 1 | 0 | # | ob |
| 2772 | 1 | 3 | -1.050000 | -13.095260908 | -1.860389700 | 15.431920289  | 1 | 1 | 0 | # | ob |
| 2773 | 1 | 3 | -1.050000 | -14.548205513 | -1.680900680 | 17.631368622  | 1 | 1 | 0 | # | ob |
| 2774 | 1 | 3 | -1.050000 | -13.923644487 | -2.773649320 | -17.631368622 | 1 | 1 | 1 | # | ob |
| 2775 | 1 | 3 | -1.050000 | -10.506910908 | -6.314939700 | 15.431920289  | 1 | 1 | 0 | # | ob |
| 2776 | 1 | 3 | -1.050000 | -13.923064655 | -6.132051481 | -17.631577932 | 1 | 1 | 1 | # | ob |
| 2777 | 1 | 3 | -1.050000 | -12.788567264 | -1.850546126 | -15.433153738 | 1 | 1 | 1 | # | ob |
| 2778 | 1 | 3 | -1.050000 | -11.334714655 | -1.677501481 | -17.631577932 | 1 | 1 | 1 | # | ob |
| 2779 | 1 | 3 | -1.050000 | -15.376917264 | -6.305096126 | -15.433153738 | 1 | 1 | 1 | # | ob |
| 2780 | 1 | 3 | -1.050000 | -12.788239092 | -7.048710300 | -15.431920289 | 1 | 1 | 1 | # | ob |
| 2781 | 1 | 4 | -0.950000 | -13.530842343 | -8.908159004 | -17.652417115 | 1 | 1 | 1 | # | oh |
| 2782 | 1 | 3 | -1.050000 | -10.863018349 | -8.905123030 | -15.603517583 | 1 | 1 | 1 | # | ob |
| 2783 | 1 | 4 | -0.950000 | -10.942492343 | -4.453609004 | -17.652417115 | 1 | 1 | 1 | # | oh |
| 2784 | 1 | 3 | -1.050000 | -13.451368349 | -4.450573030 | -15.603517583 | 1 | 1 | 1 | # | ob |
| 2785 | 1 | 4 | -0.950000 | -12.352657657 | -0.000940996 | 17.652417115  | 1 | 1 | 0 | # | oh |
| 2786 | 1 | 3 | -1.050000 | -15.020481651 | -0.003976970 | 15.603517583  | 1 | 1 | 0 | # | ob |
| 2787 | 1 | 4 | -0.950000 | -14.941007657 | -4.455490996 | 17.652417115  | 1 | 1 | 0 | # | oh |
| 2788 | 1 | 3 | -1.050000 | -12.432131651 | -4.458526970 | 15.603517583  | 1 | 1 | 0 | # | ob |
| 2789 | 1 | 3 | -1.050000 | -11.335294487 | -7.228199320 | -17.631368622 | 1 | 1 | 1 | # | ob |
| 2790 | 1 | 3 | -1.050000 | -15.376589092 | -2.594160300 | -15.431920289 | 1 | 1 | 1 | # | ob |
| 2791 | 1 | 3 | -1.050000 | -11.960435345 | -2.777048519 | 17.631577932  | 1 | 1 | 0 | # | ob |
| 2792 | 1 | 3 | -1.050000 | -13.094932736 | -7.058553874 | 15.433153738  | 1 | 1 | 0 | # | ob |
| 2793 | 1 | 5 | 2.100000  | -11.307102986 | -7.381980796 | -16.002222830 | 1 | 1 | 1 | # | st |
| 2794 | 1 | 5 | 2.100000  | -11.988072226 | -2.935729218 | 16.003201903  | 1 | 1 | 0 | # | st |
| 2795 | 1 | 5 | 2.100000  | -14.576397014 | -1.527119204 | 16.002222830  | 1 | 1 | 0 | # | st |
| 2796 | 1 | 5 | 2.100000  | -11.988047014 | -5.981669204 | 16.002222830  | 1 | 1 | 0 | # | st |
| 2797 | 1 | 5 | 2.100000  | -11.307077774 | -1.518820782 | -16.003201903 | 1 | 1 | 1 | # | st |
| 2798 | 1 | 5 | 2.100000  | -13.895427774 | -5.973370782 | -16.003201903 | 1 | 1 | 1 | # | st |
| 2799 | 1 | 5 | 2.100000  | -13.895452986 | -2.927430796 | -16.002222830 | 1 | 1 | 1 | # | st |
| 2800 | 1 | 5 | 2.100000  | -14.576422226 | -7.390279218 | 16.003201903  | 1 | 1 | 0 | # | st |
| 2801 | 1 | 1 | 1.575000  | -7.764844971  | -7.434438432 | -18.664729368 | 1 | 1 | 1 | # | ao |
| 2802 | 1 | 1 | 1.575000  | -10.353194971 | -2.979888432 | -18.664729368 | 1 | 1 | 1 | # | ao |
| 2803 | 1 | 1 | 1.575000  | -7.765255029  | -1.474661568 | 18.664729368  | 1 | 1 | 0 | # | ao |
| 2804 | 1 | 1 | 1.575000  | -5.176905029  | -5.929211568 | 18.664729368  | 1 | 1 | 0 | # | ao |
| 2805 | 1 | 2 | 0.425000  | -6.618749128  | -4.451832678 | -17.178884937 | 1 | 1 | 1 | # | ho |
| 2806 | 1 | 2 | 0.425000  | -9.207099128  | -8.906382678 | -17.178884937 | 1 | 1 | 1 | # | ho |
| 2807 | 1 | 2 | 0.425000  | -8.911350872  | -4.457267322 | 17.178884937  | 1 | 1 | 0 | # | ho |
| 2808 | 1 | 2 | 0.425000  | -6.323000872  | -0.002717322 | 17.178884937  | 1 | 1 | 0 | # | ho |
| 2809 | 1 | 3 | -1.050000 | -9.372085345  | -7.231598519 | 17.631577932  | 1 | 1 | 0 | # | ob |
| 2810 | 1 | 3 | -1.050000 | -5.329882736  | -2.604003874 | 15.433153738  | 1 | 1 | 0 | # | ob |
| 2811 | 1 | 3 | -1.050000 | -6.783155513  | -6.135450680 | 17.631368622  | 1 | 1 | 0 | # | ob |
| 2812 | 1 | 3 | -1.050000 | -7.918560908  | -1.860389700 | 15.431920289  | 1 | 1 | 0 | # | ob |
| 2813 | 1 | 3 | -1.050000 | -9.371505513  | -1.680900680 | 17.631368622  | 1 | 1 | 0 | # | ob |
| 2814 | 1 | 3 | -1.050000 | -8.746944487  | -2.773649320 | -17.631368622 | 1 | 1 | 1 | # | ob |
| 2815 | 1 | 3 | -1.050000 | -5.330210908  | -6.314939700 | 15.431920289  | 1 | 1 | 0 | # | ob |
| 2816 | 1 | 3 | -1.050000 | -8.746364655  | -6.132051481 | -17.631577932 | 1 | 1 | 1 | # | ob |
| 2817 | 1 | 3 | -1.050000 | -7.611867264  | -1.850546126 | -15.433153738 | 1 | 1 | 1 | # | ob |
| 2818 | 1 | 3 | -1.050000 | -6.158014655  | -1.677501481 | -17.631577932 | 1 | 1 | 1 | # | ob |
| 2819 | 1 | 3 | -1.050000 | -10.200217264 | -6.305096126 | -15.433153738 | 1 | 1 | 1 | # | ob |
| 2820 | 1 | 3 | -1.050000 | -7.611539092  | -7.048710300 | -15.431920289 | 1 | 1 | 1 | # | ob |
| 2821 | 1 | 4 | -0.950000 | -8.354142343  | -8.908159004 | -17.652417115 | 1 | 1 | 1 | # | oh |
| 2822 | 1 | 3 | -1.050000 | -5.686318349  | -8.905123030 | -15.603517583 | 1 | 1 | 1 | # | ob |
| 2823 | 1 | 4 | -0.950000 | -5.765792343  | -4.453609004 | -17.652417115 | 1 | 1 | 1 | # | oh |
| 2824 | 1 | 3 | -1.050000 | -8.274668349  | -4.450573030 | -15.603517583 | 1 | 1 | 1 | # | ob |
| 2825 | 1 | 4 | -0.950000 | -7.175957657  | -0.000940996 | 17.652417115  | 1 | 1 | 0 | # | oh |
| 2826 | 1 | 3 | -1.050000 | -9.843781651  | -0.003976970 | 15.603517583  | 1 | 1 | 0 | # | ob |
| 2827 | 1 | 4 | -0.950000 | -9.764307657  | -4.455490996 | 17.652417115  | 1 | 1 | 0 | # | oh |
| 2828 | 1 | 3 | -1.050000 | -7.255431651  | -4.458526970 | 15.603517583  | 1 | 1 | 0 | # | ob |
| 2829 | 1 | 3 | -1.050000 | -6.158594487  | -7.228199320 | -17.631368622 | 1 | 1 | 1 | # | ob |
| 2830 | 1 | 3 | -1.050000 | -10.199889092 | -2.594160300 | -15.431920289 | 1 | 1 | 1 | # | ob |

|      |   |   |           |              |              |               |   |   |   |   |    |
|------|---|---|-----------|--------------|--------------|---------------|---|---|---|---|----|
| 2831 | 1 | 3 | -1.050000 | -6.783735345 | -2.777048519 | 17.631577932  | 1 | 1 | 0 | # | ob |
| 2832 | 1 | 3 | -1.050000 | -7.918232736 | -7.058553874 | 15.433153738  | 1 | 1 | 0 | # | ob |
| 2833 | 1 | 5 | 2.100000  | -6.130402986 | -7.381980796 | -16.002222830 | 1 | 1 | 1 | # | st |
| 2834 | 1 | 5 | 2.100000  | -6.811372226 | -2.935729218 | 16.003201903  | 1 | 1 | 0 | # | st |
| 2835 | 1 | 5 | 2.100000  | -9.399697014 | -1.527119204 | 16.002222830  | 1 | 1 | 0 | # | st |
| 2836 | 1 | 5 | 2.100000  | -6.811347014 | -5.981669204 | 16.002222830  | 1 | 1 | 0 | # | st |
| 2837 | 1 | 5 | 2.100000  | -6.130377774 | -1.518820782 | -16.003201903 | 1 | 1 | 1 | # | st |
| 2838 | 1 | 5 | 2.100000  | -8.718727774 | -5.973370782 | -16.003201903 | 1 | 1 | 1 | # | st |
| 2839 | 1 | 5 | 2.100000  | -8.718752986 | -2.927430796 | -16.002222830 | 1 | 1 | 1 | # | st |
| 2840 | 1 | 5 | 2.100000  | -9.399722226 | -7.390279218 | 16.003201903  | 1 | 1 | 0 | # | st |
| 2841 | 1 | 1 | 1.575000  | -2.588144971 | -7.434438432 | -18.664729368 | 1 | 1 | 1 | # | ao |
| 2842 | 1 | 1 | 1.575000  | -5.176494971 | -2.979888432 | -18.664729368 | 1 | 1 | 1 | # | ao |
| 2843 | 1 | 1 | 1.575000  | -2.588555029 | -1.474661568 | 18.664729368  | 1 | 1 | 0 | # | ao |
| 2844 | 1 | 1 | 1.575000  | -0.000205029 | -5.929211568 | 18.664729368  | 1 | 1 | 0 | # | ao |
| 2845 | 1 | 2 | 0.425000  | -1.442049128 | -4.451832678 | -17.178884937 | 1 | 1 | 1 | # | ho |
| 2846 | 1 | 2 | 0.425000  | -4.030399128 | -8.906382678 | -17.178884937 | 1 | 1 | 1 | # | ho |
| 2847 | 1 | 2 | 0.425000  | -3.734650872 | -4.457267322 | 17.178884937  | 1 | 1 | 0 | # | ho |
| 2848 | 1 | 2 | 0.425000  | -1.146300872 | -0.002717322 | 17.178884937  | 1 | 1 | 0 | # | ho |
| 2849 | 1 | 3 | -1.050000 | -4.195385345 | -7.231598519 | 17.631577932  | 1 | 1 | 0 | # | ob |
| 2850 | 1 | 3 | -1.050000 | -0.153182736 | -2.604003874 | 15.433153738  | 1 | 1 | 0 | # | ob |
| 2851 | 1 | 3 | -1.050000 | -1.606455513 | -6.135450680 | 17.631368622  | 1 | 1 | 0 | # | ob |
| 2852 | 1 | 3 | -1.050000 | -2.741860908 | -1.860389700 | 15.431920289  | 1 | 1 | 0 | # | ob |
| 2853 | 1 | 3 | -1.050000 | -4.194805513 | -1.680900680 | 17.631368622  | 1 | 1 | 0 | # | ob |
| 2854 | 1 | 3 | -1.050000 | -3.570244487 | -2.773649320 | -17.631368622 | 1 | 1 | 1 | # | ob |
| 2855 | 1 | 3 | -1.050000 | -0.153510908 | -6.314939700 | 15.431920289  | 1 | 1 | 0 | # | ob |
| 2856 | 1 | 3 | -1.050000 | -3.569664655 | -6.132051481 | -17.631577932 | 1 | 1 | 1 | # | ob |
| 2857 | 1 | 3 | -1.050000 | -2.435167264 | -1.850546126 | -15.433153738 | 1 | 1 | 1 | # | ob |
| 2858 | 1 | 3 | -1.050000 | -0.981314655 | -1.677501481 | -17.631577932 | 1 | 1 | 1 | # | ob |
| 2859 | 1 | 3 | -1.050000 | -5.023517264 | -6.305096126 | -15.433153738 | 1 | 1 | 1 | # | ob |
| 2860 | 1 | 3 | -1.050000 | -2.434839092 | -7.048710300 | -15.431920289 | 1 | 1 | 1 | # | ob |
| 2861 | 1 | 4 | -0.950000 | -3.177442343 | -8.908159004 | -17.652417115 | 1 | 1 | 1 | # | oh |
| 2862 | 1 | 3 | -1.050000 | -0.509618349 | -8.905123030 | -15.603517583 | 1 | 1 | 1 | # | ob |
| 2863 | 1 | 4 | -0.950000 | -0.589092343 | -4.453609004 | -17.652417115 | 1 | 1 | 1 | # | oh |
| 2864 | 1 | 3 | -1.050000 | -3.097968349 | -4.450573030 | -15.603517583 | 1 | 1 | 1 | # | ob |
| 2865 | 1 | 4 | -0.950000 | -1.999257657 | -0.000940996 | 17.652417115  | 1 | 1 | 0 | # | oh |
| 2866 | 1 | 3 | -1.050000 | -4.667081651 | -0.003976970 | 15.603517583  | 1 | 1 | 0 | # | ob |
| 2867 | 1 | 4 | -0.950000 | -4.587607657 | -4.455490996 | 17.652417115  | 1 | 1 | 0 | # | oh |
| 2868 | 1 | 3 | -1.050000 | -2.078731651 | -4.458526970 | 15.603517583  | 1 | 1 | 0 | # | ob |
| 2869 | 1 | 3 | -1.050000 | -0.981894487 | -7.228199320 | -17.631368622 | 1 | 1 | 1 | # | ob |
| 2870 | 1 | 3 | -1.050000 | -5.023189092 | -2.594160300 | -15.431920289 | 1 | 1 | 1 | # | ob |
| 2871 | 1 | 3 | -1.050000 | -1.607035345 | -2.777048519 | 17.631577932  | 1 | 1 | 0 | # | ob |
| 2872 | 1 | 3 | -1.050000 | -2.741532736 | -7.058553874 | 15.433153738  | 1 | 1 | 0 | # | ob |
| 2873 | 1 | 5 | 2.100000  | -0.953702986 | -7.381980796 | -16.002222830 | 1 | 1 | 1 | # | st |
| 2874 | 1 | 5 | 2.100000  | -1.634672226 | -2.935729218 | 16.003201903  | 1 | 1 | 0 | # | st |
| 2875 | 1 | 5 | 2.100000  | -4.222997014 | -1.527119204 | 16.002222830  | 1 | 1 | 0 | # | st |
| 2876 | 1 | 5 | 2.100000  | -1.634647014 | -5.981669204 | 16.002222830  | 1 | 1 | 0 | # | st |
| 2877 | 1 | 5 | 2.100000  | -0.953677774 | -1.518820782 | -16.003201903 | 1 | 1 | 1 | # | st |
| 2878 | 1 | 5 | 2.100000  | -3.542027774 | -5.973370782 | -16.003201903 | 1 | 1 | 1 | # | st |
| 2879 | 1 | 5 | 2.100000  | -3.542052986 | -2.927430796 | -16.002222830 | 1 | 1 | 1 | # | st |
| 2880 | 1 | 5 | 2.100000  | -4.223022226 | -7.390279218 | 16.003201903  | 1 | 1 | 0 | # | st |
| 2881 | 1 | 1 | 1.575000  | 2.588555029  | 1.474661568  | -9.332229368  | 0 | 0 | 1 | # | ao |
| 2882 | 1 | 1 | 1.575000  | 0.000205029  | 5.929211568  | -9.332229368  | 0 | 0 | 1 | # | ao |
| 2883 | 1 | 1 | 1.575000  | 2.588144971  | 7.434438432  | -9.332770632  | 0 | 0 | 1 | # | ao |
| 2884 | 1 | 1 | 1.575000  | 5.176494971  | 2.979888432  | -9.332770632  | 0 | 0 | 1 | # | ao |
| 2885 | 1 | 2 | 0.425000  | 3.734650872  | 4.457267322  | -7.846384937  | 0 | 0 | 1 | # | ho |
| 2886 | 1 | 2 | 0.425000  | 1.146300872  | 0.002717322  | -7.846384937  | 0 | 0 | 1 | # | ho |
| 2887 | 1 | 2 | 0.425000  | 1.442049128  | 4.451832678  | -10.818615063 | 0 | 0 | 1 | # | ho |
| 2888 | 1 | 2 | 0.425000  | 4.030399128  | 8.906382678  | -10.818615063 | 0 | 0 | 1 | # | ho |
| 2889 | 1 | 3 | -1.050000 | 0.981314655  | 1.677501481  | -10.365922068 | 0 | 0 | 1 | # | ob |
| 2890 | 1 | 3 | -1.050000 | 5.023517264  | 6.305096126  | -12.564346262 | 0 | 0 | 1 | # | ob |
| 2891 | 1 | 3 | -1.050000 | 3.570244487  | 2.773649320  | -10.366131378 | 0 | 0 | 1 | # | ob |
| 2892 | 1 | 3 | -1.050000 | 2.434839092  | 7.048710300  | -12.565579711 | 0 | 0 | 1 | # | ob |
| 2893 | 1 | 3 | -1.050000 | 0.981894487  | 7.228199320  | -10.366131378 | 0 | 0 | 1 | # | ob |
| 2894 | 1 | 3 | -1.050000 | 1.606455513  | 6.135450680  | -8.298868622  | 0 | 0 | 1 | # | ob |
| 2895 | 1 | 3 | -1.050000 | 5.023189092  | 2.594160300  | -12.565579711 | 0 | 0 | 1 | # | ob |
| 2896 | 1 | 3 | -1.050000 | 1.607035345  | 2.777048519  | -8.299077932  | 0 | 0 | 1 | # | ob |
| 2897 | 1 | 3 | -1.050000 | 2.741532736  | 7.058553874  | -6.100653738  | 0 | 0 | 1 | # | ob |
| 2898 | 1 | 3 | -1.050000 | 4.195385345  | 7.231598519  | -8.299077932  | 0 | 0 | 1 | # | ob |
| 2899 | 1 | 3 | -1.050000 | 0.153182736  | 2.604003874  | -6.100653738  | 0 | 0 | 1 | # | ob |
| 2900 | 1 | 3 | -1.050000 | 2.741860908  | 1.860389700  | -6.099420289  | 0 | 0 | 1 | # | ob |
| 2901 | 1 | 4 | -0.950000 | 1.999257657  | 0.000940996  | -8.319917115  | 0 | 0 | 1 | # | oh |
| 2902 | 1 | 3 | -1.050000 | 4.667081651  | 0.003976970  | -6.271017583  | 0 | 0 | 1 | # | ob |
| 2903 | 1 | 4 | -0.950000 | 4.587607657  | 4.455490996  | -8.319917115  | 0 | 0 | 1 | # | oh |
| 2904 | 1 | 3 | -1.050000 | 2.078731651  | 4.458526970  | -6.271017583  | 0 | 0 | 1 | # | ob |
| 2905 | 1 | 4 | -0.950000 | 3.177442343  | 8.908159004  | -10.345082885 | 0 | 0 | 1 | # | oh |
| 2906 | 1 | 3 | -1.050000 | 0.509618349  | 8.905123030  | -12.393982417 | 0 | 0 | 1 | # | ob |
| 2907 | 1 | 4 | -0.950000 | 0.589092343  | 4.453609004  | -10.345082885 | 0 | 0 | 1 | # | oh |
| 2908 | 1 | 3 | -1.050000 | 3.097968349  | 4.450573030  | -12.393982417 | 0 | 0 | 1 | # | ob |
| 2909 | 1 | 3 | -1.050000 | 4.194805513  | 1.680900680  | -8.298868622  | 0 | 0 | 1 | # | ob |
| 2910 | 1 | 3 | -1.050000 | 0.153510908  | 6.314939700  | -6.099420289  | 0 | 0 | 1 | # | ob |
| 2911 | 1 | 3 | -1.050000 | 3.569664655  | 6.132051481  | -10.365922068 | 0 | 0 | 1 | # | ob |
| 2912 | 1 | 3 | -1.050000 | 2.435167264  | 1.850546126  | -12.564346262 | 0 | 0 | 1 | # | ob |
| 2913 | 1 | 5 | 2.100000  | 4.222997014  | 1.527119204  | -6.669722830  | 0 | 0 | 1 | # | st |
| 2914 | 1 | 5 | 2.100000  | 3.542027774  | 5.973370782  | -11.994298097 | 0 | 0 | 1 | # | st |
| 2915 | 1 | 5 | 2.100000  | 0.953702986  | 7.381980796  | -11.995277170 | 0 | 0 | 1 | # | st |
| 2916 | 1 | 5 | 2.100000  | 3.542052986  | 2.927430796  | -11.995277170 | 0 | 0 | 1 | # | st |
| 2917 | 1 | 5 | 2.100000  | 4.223022226  | 7.390279218  | -6.670701903  | 0 | 0 | 1 | # | st |
| 2918 | 1 | 5 | 2.100000  | 1.634672226  | 2.935729218  | -6.670701903  | 0 | 0 | 1 | # | st |
| 2919 | 1 | 5 | 2.100000  | 1.634647014  | 5.981669204  | -6.669722830  | 0 | 0 | 1 | # | st |
| 2920 | 1 | 5 | 2.100000  | 0.953677774  | 1.518820782  | -11.994298097 | 0 | 0 | 1 | # | st |
| 2921 | 1 | 1 | 1.575000  | 7.765255029  | 1.474661568  | -9.332229368  | 0 | 0 | 1 | # | ao |
| 2922 | 1 | 1 | 1.575000  | 5.176905029  | 5.929211568  | -9.332229368  | 0 | 0 | 1 | # | ao |
| 2923 | 1 | 1 | 1.575000  | 7.764844971  | 7.434438432  | -9.332770632  | 0 | 0 | 1 | # | ao |



|      |   |   |           |               |             |               |   |   |   |   |    |
|------|---|---|-----------|---------------|-------------|---------------|---|---|---|---|----|
| 2924 | 1 | 1 | 1.575000  | 10.353194971  | 2.979888432 | -9.332770632  | 0 | 0 | 1 | # | ao |
| 2925 | 1 | 2 | 0.425000  | 8.911350872   | 4.457267322 | -7.846384937  | 0 | 0 | 1 | # | ho |
| 2926 | 1 | 2 | 0.425000  | 6.323000872   | 0.002717322 | -7.846384937  | 0 | 0 | 1 | # | ho |
| 2927 | 1 | 2 | 0.425000  | 6.618749128   | 4.451832678 | -10.818615063 | 0 | 0 | 1 | # | ho |
| 2928 | 1 | 2 | 0.425000  | 9.207099128   | 8.906382678 | -10.818615063 | 0 | 0 | 1 | # | ho |
| 2929 | 1 | 3 | -1.050000 | 6.158014655   | 1.677501481 | -10.365922068 | 0 | 0 | 1 | # | ob |
| 2930 | 1 | 3 | -1.050000 | 10.200217264  | 6.305096126 | -12.564346262 | 0 | 0 | 1 | # | ob |
| 2931 | 1 | 3 | -1.050000 | 8.746944487   | 2.773649320 | -10.366131378 | 0 | 0 | 1 | # | ob |
| 2932 | 1 | 3 | -1.050000 | 7.611539092   | 7.048710300 | -12.565579711 | 0 | 0 | 1 | # | ob |
| 2933 | 1 | 3 | -1.050000 | 6.158594487   | 7.228199320 | -10.366131378 | 0 | 0 | 1 | # | ob |
| 2934 | 1 | 3 | -1.050000 | 6.783155513   | 6.135450680 | -8.298868622  | 0 | 0 | 1 | # | ob |
| 2935 | 1 | 3 | -1.050000 | 10.199889092  | 2.594160300 | -12.565579711 | 0 | 0 | 1 | # | ob |
| 2936 | 1 | 3 | -1.050000 | 6.783735345   | 2.777048519 | -8.299077932  | 0 | 0 | 1 | # | ob |
| 2937 | 1 | 3 | -1.050000 | 7.918232736   | 7.058553874 | -6.100653738  | 0 | 0 | 1 | # | ob |
| 2938 | 1 | 3 | -1.050000 | 9.372085345   | 7.231598519 | -8.299077932  | 0 | 0 | 1 | # | ob |
| 2939 | 1 | 3 | -1.050000 | 5.329882736   | 2.604003874 | -6.100653738  | 0 | 0 | 1 | # | ob |
| 2940 | 1 | 3 | -1.050000 | 7.918560908   | 1.860389700 | -6.099420289  | 0 | 0 | 1 | # | ob |
| 2941 | 1 | 4 | -0.950000 | 7.175957657   | 0.000940996 | -8.319917115  | 0 | 0 | 1 | # | oh |
| 2942 | 1 | 3 | -1.050000 | 9.843781651   | 0.003976970 | -6.271017583  | 0 | 0 | 1 | # | ob |
| 2943 | 1 | 4 | -0.950000 | 9.764307657   | 4.455490996 | -8.319917115  | 0 | 0 | 1 | # | oh |
| 2944 | 1 | 3 | -1.050000 | 7.255431651   | 4.458526970 | -6.271017583  | 0 | 0 | 1 | # | ob |
| 2945 | 1 | 4 | -0.950000 | 8.354142343   | 8.908159004 | -10.345082885 | 0 | 0 | 1 | # | oh |
| 2946 | 1 | 3 | -1.050000 | 5.686318349   | 8.905123030 | -12.393982417 | 0 | 0 | 1 | # | ob |
| 2947 | 1 | 4 | -0.950000 | 5.765792343   | 4.453609004 | -10.345082885 | 0 | 0 | 1 | # | oh |
| 2948 | 1 | 3 | -1.050000 | 8.274668349   | 4.450573030 | -12.393982417 | 0 | 0 | 1 | # | ob |
| 2949 | 1 | 3 | -1.050000 | 9.371505513   | 1.680900680 | -8.298868622  | 0 | 0 | 1 | # | ob |
| 2950 | 1 | 3 | -1.050000 | 5.330210908   | 6.314939700 | -6.099420289  | 0 | 0 | 1 | # | ob |
| 2951 | 1 | 3 | -1.050000 | 8.746364655   | 6.132051481 | -10.365922068 | 0 | 0 | 1 | # | ob |
| 2952 | 1 | 3 | -1.050000 | 7.611867264   | 1.850546126 | -12.564346262 | 0 | 0 | 1 | # | ob |
| 2953 | 1 | 5 | 2.100000  | 9.399697014   | 1.527119204 | -6.669722830  | 0 | 0 | 1 | # | st |
| 2954 | 1 | 5 | 2.100000  | 8.718727774   | 5.973370782 | -11.994298097 | 0 | 0 | 1 | # | st |
| 2955 | 1 | 5 | 2.100000  | 6.130402986   | 7.381980796 | -11.995277170 | 0 | 0 | 1 | # | st |
| 2956 | 1 | 5 | 2.100000  | 8.718752986   | 2.927430796 | -11.995277170 | 0 | 0 | 1 | # | st |
| 2957 | 1 | 5 | 2.100000  | 9.399722226   | 7.390279218 | -6.670701903  | 0 | 0 | 1 | # | st |
| 2958 | 1 | 5 | 2.100000  | 6.811372226   | 2.935729218 | -6.670701903  | 0 | 0 | 1 | # | st |
| 2959 | 1 | 5 | 2.100000  | 6.811347014   | 5.981669204 | -6.669722830  | 0 | 0 | 1 | # | st |
| 2960 | 1 | 5 | 2.100000  | 6.130377774   | 1.518820782 | -11.994298097 | 0 | 0 | 1 | # | st |
| 2961 | 1 | 1 | 1.575000  | 12.941955029  | 1.474661568 | -9.332229368  | 0 | 0 | 1 | # | ao |
| 2962 | 1 | 1 | 1.575000  | 10.353605029  | 5.929211568 | -9.332229368  | 0 | 0 | 1 | # | ao |
| 2963 | 1 | 1 | 1.575000  | 12.941544971  | 7.434438432 | -9.332770632  | 0 | 0 | 1 | # | ao |
| 2964 | 1 | 1 | 1.575000  | 15.529894971  | 2.979888432 | -9.332770632  | 0 | 0 | 1 | # | ao |
| 2965 | 1 | 2 | 0.425000  | 14.088050872  | 4.457267322 | -7.846384937  | 0 | 0 | 1 | # | ho |
| 2966 | 1 | 2 | 0.425000  | 11.499700872  | 0.002717322 | -7.846384937  | 0 | 0 | 1 | # | ho |
| 2967 | 1 | 2 | 0.425000  | 11.795449128  | 4.451832678 | -10.818615063 | 0 | 0 | 1 | # | ho |
| 2968 | 1 | 2 | 0.425000  | 14.383799128  | 8.906382678 | -10.818615063 | 0 | 0 | 1 | # | ho |
| 2969 | 1 | 3 | -1.050000 | 11.334714655  | 1.677501481 | -10.365922068 | 0 | 0 | 1 | # | ob |
| 2970 | 1 | 3 | -1.050000 | 15.376917264  | 6.305096126 | -12.564346262 | 0 | 0 | 1 | # | ob |
| 2971 | 1 | 3 | -1.050000 | 13.923644487  | 2.773649320 | -10.366131378 | 0 | 0 | 1 | # | ob |
| 2972 | 1 | 3 | -1.050000 | 12.788239092  | 7.048710300 | -12.565579711 | 0 | 0 | 1 | # | ob |
| 2973 | 1 | 3 | -1.050000 | 11.335294487  | 7.228199320 | -10.366131378 | 0 | 0 | 1 | # | ob |
| 2974 | 1 | 3 | -1.050000 | 11.959855513  | 6.135450680 | -8.298868622  | 0 | 0 | 1 | # | ob |
| 2975 | 1 | 3 | -1.050000 | 15.376589092  | 2.594160300 | -12.565579711 | 0 | 0 | 1 | # | ob |
| 2976 | 1 | 3 | -1.050000 | 11.960435345  | 2.777048519 | -8.299077932  | 0 | 0 | 1 | # | ob |
| 2977 | 1 | 3 | -1.050000 | 13.094932736  | 7.058553874 | -6.100653738  | 0 | 0 | 1 | # | ob |
| 2978 | 1 | 3 | -1.050000 | 14.548785345  | 7.231598519 | -8.299077932  | 0 | 0 | 1 | # | ob |
| 2979 | 1 | 3 | -1.050000 | 10.506582736  | 2.604003874 | -6.100653738  | 0 | 0 | 1 | # | ob |
| 2980 | 1 | 3 | -1.050000 | 13.095260908  | 1.860389700 | -6.099420289  | 0 | 0 | 1 | # | ob |
| 2981 | 1 | 4 | -0.950000 | 12.352657657  | 0.000940996 | -8.319917115  | 0 | 0 | 1 | # | oh |
| 2982 | 1 | 3 | -1.050000 | 15.020481651  | 0.003976970 | -6.271017583  | 0 | 0 | 1 | # | ob |
| 2983 | 1 | 4 | -0.950000 | 14.941007657  | 4.455490996 | -8.319917115  | 0 | 0 | 1 | # | oh |
| 2984 | 1 | 3 | -1.050000 | 12.432131651  | 4.458526970 | -6.271017583  | 0 | 0 | 1 | # | ob |
| 2985 | 1 | 4 | -0.950000 | 13.530842343  | 8.908159004 | -10.345082885 | 0 | 0 | 1 | # | oh |
| 2986 | 1 | 3 | -1.050000 | 10.863018349  | 8.905123030 | -12.393982417 | 0 | 0 | 1 | # | ob |
| 2987 | 1 | 4 | -0.950000 | 10.942492343  | 4.453609004 | -10.345082885 | 0 | 0 | 1 | # | oh |
| 2988 | 1 | 3 | -1.050000 | 13.451368349  | 4.450573030 | -12.393982417 | 0 | 0 | 1 | # | ob |
| 2989 | 1 | 3 | -1.050000 | 14.548205513  | 1.680900680 | -8.298868622  | 0 | 0 | 1 | # | ob |
| 2990 | 1 | 3 | -1.050000 | 10.506910908  | 6.314939700 | -6.099420289  | 0 | 0 | 1 | # | ob |
| 2991 | 1 | 3 | -1.050000 | 13.923064655  | 6.132051481 | -10.365922068 | 0 | 0 | 1 | # | ob |
| 2992 | 1 | 3 | -1.050000 | 12.788567264  | 1.850546126 | -12.564346262 | 0 | 0 | 1 | # | ob |
| 2993 | 1 | 5 | 2.100000  | 14.576397014  | 1.527119204 | -6.669722830  | 0 | 0 | 1 | # | st |
| 2994 | 1 | 5 | 2.100000  | 13.895427774  | 5.973370782 | -11.994298097 | 0 | 0 | 1 | # | st |
| 2995 | 1 | 5 | 2.100000  | 11.307102986  | 7.381980796 | -11.995277170 | 0 | 0 | 1 | # | st |
| 2996 | 1 | 5 | 2.100000  | 13.895452986  | 2.927430796 | -11.995277170 | 0 | 0 | 1 | # | st |
| 2997 | 1 | 5 | 2.100000  | 14.576422226  | 7.390279218 | -6.670701903  | 0 | 0 | 1 | # | st |
| 2998 | 1 | 5 | 2.100000  | 11.988072226  | 2.935729218 | -6.670701903  | 0 | 0 | 1 | # | st |
| 2999 | 1 | 5 | 2.100000  | 11.988047014  | 5.981669204 | -6.669722830  | 0 | 0 | 1 | # | st |
| 3000 | 1 | 5 | 2.100000  | 11.307077774  | 1.518820782 | -11.994298097 | 0 | 0 | 1 | # | st |
| 3001 | 1 | 1 | 1.575000  | -12.941544971 | 1.474661568 | -9.332229368  | 1 | 0 | 1 | # | ao |
| 3002 | 1 | 1 | 1.575000  | -15.529894971 | 5.929211568 | -9.332229368  | 1 | 0 | 1 | # | ao |
| 3003 | 1 | 1 | 1.575000  | -12.941955029 | 7.434438432 | -9.332770632  | 1 | 0 | 1 | # | ao |
| 3004 | 1 | 1 | 1.575000  | -10.353605029 | 2.979888432 | -9.332770632  | 1 | 0 | 1 | # | ao |
| 3005 | 1 | 2 | 0.425000  | -11.795449128 | 4.457267322 | -7.846384937  | 1 | 0 | 1 | # | ho |
| 3006 | 1 | 2 | 0.425000  | -14.383799128 | 0.002717322 | -7.846384937  | 1 | 0 | 1 | # | ho |
| 3007 | 1 | 2 | 0.425000  | -14.088050872 | 4.451832678 | -10.818615063 | 1 | 0 | 1 | # | ho |
| 3008 | 1 | 2 | 0.425000  | -11.499700872 | 8.906382678 | -10.818615063 | 1 | 0 | 1 | # | ho |
| 3009 | 1 | 3 | -1.050000 | -14.548785345 | 1.677501481 | -10.365922068 | 1 | 0 | 1 | # | ob |
| 3010 | 1 | 3 | -1.050000 | -10.506582736 | 6.305096126 | -12.564346262 | 1 | 0 | 1 | # | ob |
| 3011 | 1 | 3 | -1.050000 | -11.959855513 | 2.773649320 | -10.366131378 | 1 | 0 | 1 | # | ob |
| 3012 | 1 | 3 | -1.050000 | -13.095260908 | 7.048710300 | -12.565579711 | 1 | 0 | 1 | # | ob |
| 3013 | 1 | 3 | -1.050000 | -14.548205513 | 7.228199320 | -10.366131378 | 1 | 0 | 1 | # | ob |
| 3014 | 1 | 3 | -1.050000 | -13.923644487 | 6.135450680 | -8.298868622  | 1 | 0 | 1 | # | ob |
| 3015 | 1 | 3 | -1.050000 | -10.506910908 | 2.594160300 | -12.565579711 | 1 | 0 | 1 | # | ob |
| 3016 | 1 | 3 | -1.050000 | -13.923064655 | 2.777048519 | -8.299077932  | 1 | 0 | 1 | # | ob |

|      |   |   |           |               |             |               |   |   |   |   |    |
|------|---|---|-----------|---------------|-------------|---------------|---|---|---|---|----|
| 3017 | 1 | 3 | -1.050000 | -12.788567264 | 7.058553874 | -6.100653738  | 1 | 0 | 1 | # | ob |
| 3018 | 1 | 3 | -1.050000 | -11.334714655 | 7.231598519 | -8.299077932  | 1 | 0 | 1 | # | ob |
| 3019 | 1 | 3 | -1.050000 | -15.376917264 | 2.604003874 | -6.100653738  | 1 | 0 | 1 | # | ob |
| 3020 | 1 | 3 | -1.050000 | -12.788239092 | 1.860389700 | -6.099420289  | 1 | 0 | 1 | # | ob |
| 3021 | 1 | 4 | -0.950000 | -13.530842343 | 0.000940996 | -8.319917115  | 1 | 0 | 1 | # | oh |
| 3022 | 1 | 3 | -1.050000 | -10.863018349 | 0.003976970 | -6.271017583  | 1 | 0 | 1 | # | ob |
| 3023 | 1 | 4 | -0.950000 | -10.942492343 | 4.455490996 | -8.319917115  | 1 | 0 | 1 | # | oh |
| 3024 | 1 | 3 | -1.050000 | -13.451368349 | 4.458526970 | -6.271017583  | 1 | 0 | 1 | # | ob |
| 3025 | 1 | 4 | -0.950000 | -12.352657657 | 8.908159004 | -10.345082885 | 1 | 0 | 1 | # | oh |
| 3026 | 1 | 3 | -1.050000 | -15.020481651 | 8.905123030 | -12.393982417 | 1 | 0 | 1 | # | ob |
| 3027 | 1 | 4 | -0.950000 | -14.941007657 | 4.453609004 | -10.345082885 | 1 | 0 | 1 | # | oh |
| 3028 | 1 | 3 | -1.050000 | -12.432131651 | 4.450573030 | -12.393982417 | 1 | 0 | 1 | # | ob |
| 3029 | 1 | 3 | -1.050000 | -11.335294487 | 1.680900680 | -8.298868622  | 1 | 0 | 1 | # | ob |
| 3030 | 1 | 3 | -1.050000 | -15.376589092 | 6.314939700 | -6.099420289  | 1 | 0 | 1 | # | ob |
| 3031 | 1 | 3 | -1.050000 | -11.960435345 | 6.132051481 | -10.365922068 | 1 | 0 | 1 | # | ob |
| 3032 | 1 | 3 | -1.050000 | -13.094932736 | 1.850546126 | -12.564346262 | 1 | 0 | 1 | # | ob |
| 3033 | 1 | 5 | 2.100000  | -11.307102986 | 1.527119204 | -6.669722830  | 1 | 0 | 1 | # | st |
| 3034 | 1 | 5 | 2.100000  | -11.988072226 | 5.973370782 | -11.994298097 | 1 | 0 | 1 | # | st |
| 3035 | 1 | 5 | 2.100000  | -14.576397014 | 7.381980796 | -11.995277170 | 1 | 0 | 1 | # | st |
| 3036 | 1 | 5 | 2.100000  | -11.988047014 | 2.927430796 | -11.995277170 | 1 | 0 | 1 | # | st |
| 3037 | 1 | 5 | 2.100000  | -11.307077774 | 7.390279218 | -6.670701903  | 1 | 0 | 1 | # | st |
| 3038 | 1 | 5 | 2.100000  | -13.895427774 | 2.935729218 | -6.670701903  | 1 | 0 | 1 | # | st |
| 3039 | 1 | 5 | 2.100000  | -13.895452986 | 5.981669204 | -6.669722830  | 1 | 0 | 1 | # | st |
| 3040 | 1 | 5 | 2.100000  | -14.576422226 | 1.518820782 | -11.994298097 | 1 | 0 | 1 | # | st |
| 3041 | 1 | 1 | 1.575000  | -7.764844971  | 1.474661568 | -9.332229368  | 1 | 0 | 1 | # | ao |
| 3042 | 1 | 1 | 1.575000  | -10.353194971 | 5.929211568 | -9.332229368  | 1 | 0 | 1 | # | ao |
| 3043 | 1 | 1 | 1.575000  | -7.765255029  | 7.434438432 | -9.332770632  | 1 | 0 | 1 | # | ao |
| 3044 | 1 | 1 | 1.575000  | -5.176905029  | 2.979888432 | -9.332770632  | 1 | 0 | 1 | # | ao |
| 3045 | 1 | 2 | 0.425000  | -6.618749128  | 4.457267322 | -7.846384937  | 1 | 0 | 1 | # | ho |
| 3046 | 1 | 2 | 0.425000  | -9.207099128  | 0.002717322 | -7.846384937  | 1 | 0 | 1 | # | ho |
| 3047 | 1 | 2 | 0.425000  | -8.911350872  | 4.451832678 | -10.818615063 | 1 | 0 | 1 | # | ho |
| 3048 | 1 | 2 | 0.425000  | -6.323000872  | 8.906382678 | -10.818615063 | 1 | 0 | 1 | # | ho |
| 3049 | 1 | 3 | -1.050000 | -9.372085345  | 1.677501481 | -10.365922068 | 1 | 0 | 1 | # | ob |
| 3050 | 1 | 3 | -1.050000 | -5.329882736  | 6.305096126 | -12.564346262 | 1 | 0 | 1 | # | ob |
| 3051 | 1 | 3 | -1.050000 | -6.783155513  | 2.773649320 | -10.366131378 | 1 | 0 | 1 | # | ob |
| 3052 | 1 | 3 | -1.050000 | -7.918560908  | 7.048710300 | -12.565579711 | 1 | 0 | 1 | # | ob |
| 3053 | 1 | 3 | -1.050000 | -9.371505513  | 7.228199320 | -10.366131378 | 1 | 0 | 1 | # | ob |
| 3054 | 1 | 3 | -1.050000 | -8.746944487  | 6.135450680 | -8.298868622  | 1 | 0 | 1 | # | ob |
| 3055 | 1 | 3 | -1.050000 | -5.330210908  | 2.594160300 | -12.565579711 | 1 | 0 | 1 | # | ob |
| 3056 | 1 | 3 | -1.050000 | -8.746364655  | 2.777048519 | -8.299077932  | 1 | 0 | 1 | # | ob |
| 3057 | 1 | 3 | -1.050000 | -7.611867264  | 7.058553874 | -6.100653738  | 1 | 0 | 1 | # | ob |
| 3058 | 1 | 3 | -1.050000 | -6.158014655  | 7.231598519 | -8.299077932  | 1 | 0 | 1 | # | ob |
| 3059 | 1 | 3 | -1.050000 | -10.200217264 | 2.604003874 | -6.100653738  | 1 | 0 | 1 | # | ob |
| 3060 | 1 | 3 | -1.050000 | -7.611539092  | 1.860389700 | -6.099420289  | 1 | 0 | 1 | # | ob |
| 3061 | 1 | 4 | -0.950000 | -8.354142343  | 0.000940996 | -8.319917115  | 1 | 0 | 1 | # | oh |
| 3062 | 1 | 3 | -1.050000 | -5.686318349  | 0.003976970 | -6.271017583  | 1 | 0 | 1 | # | ob |
| 3063 | 1 | 4 | -0.950000 | -5.765792343  | 4.455490996 | -8.319917115  | 1 | 0 | 1 | # | oh |
| 3064 | 1 | 3 | -1.050000 | -8.274668349  | 4.458526970 | -6.271017583  | 1 | 0 | 1 | # | ob |
| 3065 | 1 | 4 | -0.950000 | -7.175957657  | 8.908159004 | -10.345082885 | 1 | 0 | 1 | # | oh |
| 3066 | 1 | 3 | -1.050000 | -9.843781651  | 8.905123030 | -12.393982417 | 1 | 0 | 1 | # | ob |
| 3067 | 1 | 4 | -0.950000 | -9.764307657  | 4.453609004 | -10.345082885 | 1 | 0 | 1 | # | oh |
| 3068 | 1 | 3 | -1.050000 | -7.255431651  | 4.450573030 | -12.393982417 | 1 | 0 | 1 | # | ob |
| 3069 | 1 | 3 | -1.050000 | -6.158594487  | 1.680900680 | -8.298868622  | 1 | 0 | 1 | # | ob |
| 3070 | 1 | 3 | -1.050000 | -10.199899092 | 6.314939700 | -6.099420289  | 1 | 0 | 1 | # | ob |
| 3071 | 1 | 3 | -1.050000 | -6.783735345  | 6.132051481 | -10.365922068 | 1 | 0 | 1 | # | ob |
| 3072 | 1 | 3 | -1.050000 | -7.918232736  | 1.850546126 | -12.564346262 | 1 | 0 | 1 | # | ob |
| 3073 | 1 | 5 | 2.100000  | -6.130402986  | 1.527119204 | -6.669722830  | 1 | 0 | 1 | # | st |
| 3074 | 1 | 5 | 2.100000  | -6.811372226  | 5.973370782 | -11.994298097 | 1 | 0 | 1 | # | st |
| 3075 | 1 | 5 | 2.100000  | -9.399697014  | 7.381980796 | -11.995277170 | 1 | 0 | 1 | # | st |
| 3076 | 1 | 5 | 2.100000  | -6.811347014  | 2.927430796 | -11.995277170 | 1 | 0 | 1 | # | st |
| 3077 | 1 | 5 | 2.100000  | -6.130377774  | 7.390279218 | -6.670701903  | 1 | 0 | 1 | # | st |
| 3078 | 1 | 5 | 2.100000  | -8.718727774  | 2.935729218 | -6.670701903  | 1 | 0 | 1 | # | st |
| 3079 | 1 | 5 | 2.100000  | -8.718752986  | 5.981669204 | -6.669722830  | 1 | 0 | 1 | # | st |
| 3080 | 1 | 5 | 2.100000  | -9.399722226  | 1.518820782 | -11.994298097 | 1 | 0 | 1 | # | st |
| 3081 | 1 | 1 | 1.575000  | -2.588144971  | 1.474661568 | -9.332229368  | 1 | 0 | 1 | # | ao |
| 3082 | 1 | 1 | 1.575000  | -5.176494971  | 5.929211568 | -9.332229368  | 1 | 0 | 1 | # | ao |
| 3083 | 1 | 1 | 1.575000  | -2.588555029  | 7.434438432 | -9.332770632  | 1 | 0 | 1 | # | ao |
| 3084 | 1 | 1 | 1.575000  | -0.000205029  | 2.979888432 | -9.332770632  | 1 | 0 | 1 | # | ao |
| 3085 | 1 | 2 | 0.425000  | -1.442049128  | 4.457267322 | -7.846384937  | 1 | 0 | 1 | # | ho |
| 3086 | 1 | 2 | 0.425000  | -4.030399128  | 0.002717322 | -7.846384937  | 1 | 0 | 1 | # | ho |
| 3087 | 1 | 2 | 0.425000  | -3.734650872  | 4.451832678 | -10.818615063 | 1 | 0 | 1 | # | ho |
| 3088 | 1 | 2 | 0.425000  | -1.146300872  | 8.906382678 | -10.818615063 | 1 | 0 | 1 | # | ho |
| 3089 | 1 | 3 | -1.050000 | -4.195385345  | 1.677501481 | -10.365922068 | 1 | 0 | 1 | # | ob |
| 3090 | 1 | 3 | -1.050000 | -0.153182736  | 6.305096126 | -12.564346262 | 1 | 0 | 1 | # | ob |
| 3091 | 1 | 3 | -1.050000 | -1.606455513  | 2.773649320 | -10.366131378 | 1 | 0 | 1 | # | ob |
| 3092 | 1 | 3 | -1.050000 | -2.741860908  | 7.048710300 | -12.565579711 | 1 | 0 | 1 | # | ob |
| 3093 | 1 | 3 | -1.050000 | -4.194805513  | 7.228199320 | -10.366131378 | 1 | 0 | 1 | # | ob |
| 3094 | 1 | 3 | -1.050000 | -3.570244487  | 6.135450680 | -8.298868622  | 1 | 0 | 1 | # | ob |
| 3095 | 1 | 3 | -1.050000 | -0.153510908  | 2.594160300 | -12.565579711 | 1 | 0 | 1 | # | ob |
| 3096 | 1 | 3 | -1.050000 | -3.569664655  | 2.777048519 | -8.299077932  | 1 | 0 | 1 | # | ob |
| 3097 | 1 | 3 | -1.050000 | -2.435167264  | 7.058553874 | -6.100653738  | 1 | 0 | 1 | # | ob |
| 3098 | 1 | 3 | -1.050000 | -0.981314655  | 7.231598519 | -8.299077932  | 1 | 0 | 1 | # | ob |
| 3099 | 1 | 3 | -1.050000 | -5.023517264  | 2.604003874 | -6.100653738  | 1 | 0 | 1 | # | ob |
| 3100 | 1 | 3 | -1.050000 | -2.434839092  | 1.860389700 | -6.099420289  | 1 | 0 | 1 | # | ob |
| 3101 | 1 | 4 | -0.950000 | -3.177442343  | 0.000940996 | -8.319917115  | 1 | 0 | 1 | # | oh |
| 3102 | 1 | 3 | -1.050000 | -0.509618349  | 0.003976970 | -6.271017583  | 1 | 0 | 1 | # | ob |
| 3103 | 1 | 4 | -0.950000 | -0.589092343  | 4.455490996 | -8.319917115  | 1 | 0 | 1 | # | oh |
| 3104 | 1 | 3 | -1.050000 | -3.097968349  | 4.458526970 | -6.271017583  | 1 | 0 | 1 | # | ob |
| 3105 | 1 | 4 | -0.950000 | -1.999257657  | 8.908159004 | -10.345082885 | 1 | 0 | 1 | # | oh |
| 3106 | 1 | 3 | -1.050000 | -4.667081651  | 8.905123030 | -12.393982417 | 1 | 0 | 1 | # | ob |
| 3107 | 1 | 4 | -0.950000 | -4.587607657  | 4.453609004 | -10.345082885 | 1 | 0 | 1 | # | oh |
| 3108 | 1 | 3 | -1.050000 | -2.078731651  | 4.450573030 | -12.393982417 | 1 | 0 | 1 | # | ob |
| 3109 | 1 | 3 | -1.050000 | -0.981894487  | 1.680900680 | -8.298868622  | 1 | 0 | 1 | # | ob |

|      |   |   |           |              |              |               |   |   |   |   |    |
|------|---|---|-----------|--------------|--------------|---------------|---|---|---|---|----|
| 3110 | 1 | 3 | -1.050000 | -5.023189092 | 6.314939700  | -6.099420289  | 1 | 0 | 1 | # | ob |
| 3111 | 1 | 3 | -1.050000 | -1.607035345 | 6.132051481  | -10.365922068 | 1 | 0 | 1 | # | ob |
| 3112 | 1 | 3 | -1.050000 | -2.741532736 | 1.850546126  | -12.564346262 | 1 | 0 | 1 | # | ob |
| 3113 | 1 | 5 | 2.100000  | -0.953702986 | 1.527119204  | -6.669722830  | 1 | 0 | 1 | # | st |
| 3114 | 1 | 5 | 2.100000  | -1.634672226 | 5.973370782  | -11.994298097 | 1 | 0 | 1 | # | st |
| 3115 | 1 | 5 | 2.100000  | -4.222997014 | 7.381980796  | -11.995277170 | 1 | 0 | 1 | # | st |
| 3116 | 1 | 5 | 2.100000  | -1.634647014 | 2.927430796  | -11.995277170 | 1 | 0 | 1 | # | st |
| 3117 | 1 | 5 | 2.100000  | -0.953677774 | 7.390279218  | -6.670701903  | 1 | 0 | 1 | # | st |
| 3118 | 1 | 5 | 2.100000  | -3.542027774 | 2.935729218  | -6.670701903  | 1 | 0 | 1 | # | st |
| 3119 | 1 | 5 | 2.100000  | -3.542052986 | 5.981669204  | -6.669722830  | 1 | 0 | 1 | # | st |
| 3120 | 1 | 5 | 2.100000  | -4.223022226 | 1.518820782  | -11.994298097 | 1 | 0 | 1 | # | st |
| 3121 | 1 | 1 | 1.575000  | 2.588555029  | 10.383761568 | -9.332229368  | 0 | 0 | 1 | # | ao |
| 3122 | 1 | 1 | 1.575000  | 0.000205029  | 14.838311568 | -9.332229368  | 0 | 0 | 1 | # | ao |
| 3123 | 1 | 1 | 1.575000  | 2.588144971  | 16.343538432 | -9.332770632  | 0 | 0 | 1 | # | ao |
| 3124 | 1 | 1 | 1.575000  | 5.176494971  | 11.888988432 | -9.332770632  | 0 | 0 | 1 | # | ao |
| 3125 | 1 | 2 | 0.425000  | 3.734650872  | 13.366367322 | -7.846384937  | 0 | 0 | 1 | # | ho |
| 3126 | 1 | 2 | 0.425000  | 1.146300872  | 8.911817322  | -7.846384937  | 0 | 0 | 1 | # | ho |
| 3127 | 1 | 2 | 0.425000  | 1.442049128  | 13.360932678 | -10.818615063 | 0 | 0 | 1 | # | ho |
| 3128 | 1 | 2 | 0.425000  | 4.030399128  | 17.815482678 | -10.818615063 | 0 | 0 | 1 | # | ho |
| 3129 | 1 | 3 | -1.050000 | 0.981314655  | 10.586601481 | -10.365922068 | 0 | 0 | 1 | # | ob |
| 3130 | 1 | 3 | -1.050000 | 5.023517264  | 15.214196126 | -12.564346262 | 0 | 0 | 1 | # | ob |
| 3131 | 1 | 3 | -1.050000 | 3.570244487  | 11.682749320 | -10.366131378 | 0 | 0 | 1 | # | ob |
| 3132 | 1 | 3 | -1.050000 | 2.434839092  | 15.957810300 | -12.565579711 | 0 | 0 | 1 | # | ob |
| 3133 | 1 | 3 | -1.050000 | 0.981894487  | 16.137299320 | -10.366131378 | 0 | 0 | 1 | # | ob |
| 3134 | 1 | 3 | -1.050000 | 1.606455513  | 15.044550680 | -8.298868622  | 0 | 0 | 1 | # | ob |
| 3135 | 1 | 3 | -1.050000 | 5.023189092  | 11.503260300 | -12.565579711 | 0 | 0 | 1 | # | ob |
| 3136 | 1 | 3 | -1.050000 | 1.607035345  | 11.686148519 | -8.299077932  | 0 | 0 | 1 | # | ob |
| 3137 | 1 | 3 | -1.050000 | 2.741532736  | 15.967653874 | -6.100653738  | 0 | 0 | 1 | # | ob |
| 3138 | 1 | 3 | -1.050000 | 4.195385345  | 16.140698519 | -8.299077932  | 0 | 0 | 1 | # | ob |
| 3139 | 1 | 3 | -1.050000 | 0.153182736  | 11.513103874 | -6.100653738  | 0 | 0 | 1 | # | ob |
| 3140 | 1 | 3 | -1.050000 | 2.741860908  | 10.769489700 | -6.099420289  | 0 | 0 | 1 | # | ob |
| 3141 | 1 | 4 | -0.950000 | 1.999257657  | 8.910040996  | -8.319917115  | 0 | 0 | 1 | # | oh |
| 3142 | 1 | 3 | -1.050000 | 4.667081651  | 8.913076970  | -6.271017583  | 0 | 0 | 1 | # | ob |
| 3143 | 1 | 4 | -0.950000 | 4.587607657  | 13.364590996 | -8.319917115  | 0 | 0 | 1 | # | oh |
| 3144 | 1 | 3 | -1.050000 | 2.078731651  | 13.367626970 | -6.271017583  | 0 | 0 | 1 | # | ob |
| 3145 | 1 | 4 | -0.950000 | 3.177442343  | 17.817259004 | -10.345082885 | 0 | 0 | 1 | # | oh |
| 3146 | 1 | 3 | -1.050000 | 0.509618349  | 17.814223030 | -12.393982417 | 0 | 0 | 1 | # | ob |
| 3147 | 1 | 4 | -0.950000 | 0.589092343  | 13.362709004 | -10.345082885 | 0 | 0 | 1 | # | oh |
| 3148 | 1 | 3 | -1.050000 | 3.097968349  | 13.359673030 | -12.393982417 | 0 | 0 | 1 | # | ob |
| 3149 | 1 | 3 | -1.050000 | 4.194805513  | 10.590000680 | -8.298868622  | 0 | 0 | 1 | # | ob |
| 3150 | 1 | 3 | -1.050000 | 0.153510908  | 15.224039700 | -6.099420289  | 0 | 0 | 1 | # | ob |
| 3151 | 1 | 3 | -1.050000 | 3.569664655  | 15.041151481 | -10.365922068 | 0 | 0 | 1 | # | ob |
| 3152 | 1 | 3 | -1.050000 | 2.435167264  | 10.759646126 | -12.564346262 | 0 | 0 | 1 | # | ob |
| 3153 | 1 | 5 | 2.100000  | 4.222997014  | 10.436219204 | -6.669722830  | 0 | 0 | 1 | # | st |
| 3154 | 1 | 5 | 2.100000  | 3.542027774  | 14.882470782 | -11.994298097 | 0 | 0 | 1 | # | st |
| 3155 | 1 | 5 | 2.100000  | 0.953702986  | 16.291080796 | -11.995277170 | 0 | 0 | 1 | # | st |
| 3156 | 1 | 5 | 2.100000  | 3.542052986  | 11.836530796 | -11.995277170 | 0 | 0 | 1 | # | st |
| 3157 | 1 | 5 | 2.100000  | 4.223022226  | 16.299379218 | -6.670701903  | 0 | 0 | 1 | # | st |
| 3158 | 1 | 5 | 2.100000  | 1.634672226  | 11.844829218 | -6.670701903  | 0 | 0 | 1 | # | st |
| 3159 | 1 | 5 | 2.100000  | 1.634647014  | 14.890769204 | -6.669722830  | 0 | 0 | 1 | # | st |
| 3160 | 1 | 5 | 2.100000  | 0.953677774  | 10.427920782 | -11.994298097 | 0 | 0 | 1 | # | st |
| 3161 | 1 | 1 | 1.575000  | 7.765255029  | 10.383761568 | -9.332229368  | 0 | 0 | 1 | # | ao |
| 3162 | 1 | 1 | 1.575000  | 5.176905029  | 14.838311568 | -9.332229368  | 0 | 0 | 1 | # | ao |
| 3163 | 1 | 1 | 1.575000  | 7.764844971  | 16.343538432 | -9.332770632  | 0 | 0 | 1 | # | ao |
| 3164 | 1 | 1 | 1.575000  | 10.353194971 | 11.888988432 | -9.332770632  | 0 | 0 | 1 | # | ao |
| 3165 | 1 | 2 | 0.425000  | 8.911350872  | 13.366367322 | -7.846384937  | 0 | 0 | 1 | # | ho |
| 3166 | 1 | 2 | 0.425000  | 6.323000872  | 8.911817322  | -7.846384937  | 0 | 0 | 1 | # | ho |
| 3167 | 1 | 2 | 0.425000  | 6.618749128  | 13.360932678 | -10.818615063 | 0 | 0 | 1 | # | ho |
| 3168 | 1 | 2 | 0.425000  | 9.207099128  | 17.815482678 | -10.818615063 | 0 | 0 | 1 | # | ho |
| 3169 | 1 | 3 | -1.050000 | 6.158014655  | 10.586601481 | -10.365922068 | 0 | 0 | 1 | # | ob |
| 3170 | 1 | 3 | -1.050000 | 10.200217264 | 15.214196126 | -12.564346262 | 0 | 0 | 1 | # | ob |
| 3171 | 1 | 3 | -1.050000 | 8.746944487  | 11.682749320 | -10.366131378 | 0 | 0 | 1 | # | ob |
| 3172 | 1 | 3 | -1.050000 | 7.611539092  | 15.957810300 | -12.565579711 | 0 | 0 | 1 | # | ob |
| 3173 | 1 | 3 | -1.050000 | 6.158594487  | 16.137299320 | -10.366131378 | 0 | 0 | 1 | # | ob |
| 3174 | 1 | 3 | -1.050000 | 6.783155513  | 15.044550680 | -8.298868622  | 0 | 0 | 1 | # | ob |
| 3175 | 1 | 3 | -1.050000 | 10.199899092 | 11.503260300 | -12.565579711 | 0 | 0 | 1 | # | ob |
| 3176 | 1 | 3 | -1.050000 | 6.783735345  | 11.686148519 | -8.299077932  | 0 | 0 | 1 | # | ob |
| 3177 | 1 | 3 | -1.050000 | 7.918232736  | 15.967653874 | -6.100653738  | 0 | 0 | 1 | # | ob |
| 3178 | 1 | 3 | -1.050000 | 9.372085345  | 16.140698519 | -8.299077932  | 0 | 0 | 1 | # | ob |
| 3179 | 1 | 3 | -1.050000 | 5.329882736  | 11.513103874 | -6.100653738  | 0 | 0 | 1 | # | ob |
| 3180 | 1 | 3 | -1.050000 | 7.918560908  | 10.769489700 | -6.099420289  | 0 | 0 | 1 | # | ob |
| 3181 | 1 | 4 | -0.950000 | 7.175957657  | 8.910040996  | -8.319917115  | 0 | 0 | 1 | # | oh |
| 3182 | 1 | 3 | -1.050000 | 9.843781651  | 8.913076970  | -6.271017583  | 0 | 0 | 1 | # | ob |
| 3183 | 1 | 4 | -0.950000 | 9.764307657  | 13.364590996 | -8.319917115  | 0 | 0 | 1 | # | oh |
| 3184 | 1 | 3 | -1.050000 | 7.255431651  | 13.367626970 | -6.271017583  | 0 | 0 | 1 | # | ob |
| 3185 | 1 | 4 | -0.950000 | 8.354142343  | 17.817259004 | -10.345082885 | 0 | 0 | 1 | # | oh |
| 3186 | 1 | 3 | -1.050000 | 5.686318349  | 17.814223030 | -12.393982417 | 0 | 0 | 1 | # | ob |
| 3187 | 1 | 4 | -0.950000 | 5.765792343  | 13.362709004 | -10.345082885 | 0 | 0 | 1 | # | oh |
| 3188 | 1 | 3 | -1.050000 | 8.274668349  | 13.359673030 | -12.393982417 | 0 | 0 | 1 | # | ob |
| 3189 | 1 | 3 | -1.050000 | 9.371505513  | 10.590000680 | -8.298868622  | 0 | 0 | 1 | # | ob |
| 3190 | 1 | 3 | -1.050000 | 5.330210908  | 15.224039700 | -6.099420289  | 0 | 0 | 1 | # | ob |
| 3191 | 1 | 3 | -1.050000 | 8.746364655  | 15.041151481 | -10.365922068 | 0 | 0 | 1 | # | ob |
| 3192 | 1 | 3 | -1.050000 | 7.611867264  | 10.759646126 | -12.564346262 | 0 | 0 | 1 | # | ob |
| 3193 | 1 | 5 | 2.100000  | 9.399697014  | 10.436219204 | -6.669722830  | 0 | 0 | 1 | # | st |
| 3194 | 1 | 5 | 2.100000  | 8.718727774  | 14.882470782 | -11.994298097 | 0 | 0 | 1 | # | st |
| 3195 | 1 | 5 | 2.100000  | 6.130402986  | 16.291080796 | -11.995277170 | 0 | 0 | 1 | # | st |
| 3196 | 1 | 5 | 2.100000  | 8.718752986  | 11.836530796 | -11.995277170 | 0 | 0 | 1 | # | st |
| 3197 | 1 | 5 | 2.100000  | 9.399722226  | 16.299379218 | -6.670701903  | 0 | 0 | 1 | # | st |
| 3198 | 1 | 5 | 2.100000  | 6.811372226  | 11.844829218 | -6.670701903  | 0 | 0 | 1 | # | st |
| 3199 | 1 | 5 | 2.100000  | 6.811347014  | 14.890769204 | -6.669722830  | 0 | 0 | 1 | # | st |
| 3200 | 1 | 5 | 2.100000  | 6.130377774  | 10.427920782 | -11.994298097 | 0 | 0 | 1 | # | st |
| 3201 | 1 | 1 | 1.575000  | 12.941955029 | 10.383761568 | -9.332229368  | 0 | 0 | 1 | # | ao |
| 3202 | 1 | 1 | 1.575000  | 10.353605029 | 14.838311568 | -9.332229368  | 0 | 0 | 1 | # | ao |

|      |   |   |           |               |              |               |   |   |   |   |    |
|------|---|---|-----------|---------------|--------------|---------------|---|---|---|---|----|
| 3203 | 1 | 1 | 1.575000  | 12.941544971  | 16.343538432 | -9.332770632  | 0 | 0 | 1 | # | ao |
| 3204 | 1 | 1 | 1.575000  | 15.529894971  | 11.888988432 | -9.332770632  | 0 | 0 | 1 | # | ao |
| 3205 | 1 | 2 | 0.425000  | 14.088050872  | 13.366367322 | -7.846384937  | 0 | 0 | 1 | # | ho |
| 3206 | 1 | 2 | 0.425000  | 11.499700872  | 8.911817322  | -7.846384937  | 0 | 0 | 1 | # | ho |
| 3207 | 1 | 2 | 0.425000  | 11.795449128  | 13.360932678 | -10.818615063 | 0 | 0 | 1 | # | ho |
| 3208 | 1 | 2 | 0.425000  | 14.383799128  | 17.815482678 | -10.818615063 | 0 | 0 | 1 | # | ho |
| 3209 | 1 | 3 | -1.050000 | 11.334714655  | 10.586601481 | -10.365922068 | 0 | 0 | 1 | # | ob |
| 3210 | 1 | 3 | -1.050000 | 15.376917264  | 15.214196126 | -12.564346262 | 0 | 0 | 1 | # | ob |
| 3211 | 1 | 3 | -1.050000 | 13.923644487  | 11.682749320 | -10.366131378 | 0 | 0 | 1 | # | ob |
| 3212 | 1 | 3 | -1.050000 | 12.788239092  | 15.957810300 | -12.565579711 | 0 | 0 | 1 | # | ob |
| 3213 | 1 | 3 | -1.050000 | 11.335294487  | 16.137299320 | -10.366131378 | 0 | 0 | 1 | # | ob |
| 3214 | 1 | 3 | -1.050000 | 11.959855513  | 15.044550680 | -8.298868622  | 0 | 0 | 1 | # | ob |
| 3215 | 1 | 3 | -1.050000 | 15.376589092  | 11.503260300 | -12.565579711 | 0 | 0 | 1 | # | ob |
| 3216 | 1 | 3 | -1.050000 | 11.960435345  | 11.686148519 | -8.299077932  | 0 | 0 | 1 | # | ob |
| 3217 | 1 | 3 | -1.050000 | 13.094932736  | 15.967653874 | -6.100653738  | 0 | 0 | 1 | # | ob |
| 3218 | 1 | 3 | -1.050000 | 14.548785345  | 16.140698519 | -8.299077932  | 0 | 0 | 1 | # | ob |
| 3219 | 1 | 3 | -1.050000 | 10.506582736  | 11.513103874 | -6.100653738  | 0 | 0 | 1 | # | ob |
| 3220 | 1 | 3 | -1.050000 | 13.095260908  | 10.769489700 | -6.099420289  | 0 | 0 | 1 | # | ob |
| 3221 | 1 | 4 | -0.950000 | 12.352657657  | 8.910040996  | -8.319917115  | 0 | 0 | 1 | # | oh |
| 3222 | 1 | 3 | -1.050000 | 15.020481651  | 8.913076970  | -6.271017583  | 0 | 0 | 1 | # | ob |
| 3223 | 1 | 4 | -0.950000 | 14.941007657  | 13.364590996 | -8.319917115  | 0 | 0 | 1 | # | oh |
| 3224 | 1 | 3 | -1.050000 | 12.432131651  | 13.367626970 | -6.271017583  | 0 | 0 | 1 | # | ob |
| 3225 | 1 | 4 | -0.950000 | 13.530842343  | 17.817259004 | -10.345082885 | 0 | 0 | 1 | # | oh |
| 3226 | 1 | 3 | -1.050000 | 10.863018349  | 17.814223030 | -12.393982417 | 0 | 0 | 1 | # | ob |
| 3227 | 1 | 4 | -0.950000 | 10.942492343  | 13.362709004 | -10.345082885 | 0 | 0 | 1 | # | oh |
| 3228 | 1 | 3 | -1.050000 | 13.451368349  | 13.359673030 | -12.393982417 | 0 | 0 | 1 | # | ob |
| 3229 | 1 | 3 | -1.050000 | 14.548205513  | 10.590000680 | -8.298868622  | 0 | 0 | 1 | # | ob |
| 3230 | 1 | 3 | -1.050000 | 10.506910908  | 15.224039700 | -6.099420289  | 0 | 0 | 1 | # | ob |
| 3231 | 1 | 3 | -1.050000 | 13.923064655  | 15.041151481 | -10.365922068 | 0 | 0 | 1 | # | ob |
| 3232 | 1 | 3 | -1.050000 | 12.788567264  | 10.759646126 | -12.564346262 | 0 | 0 | 1 | # | ob |
| 3233 | 1 | 5 | 2.100000  | 14.576397014  | 10.436219204 | -6.669722830  | 0 | 0 | 1 | # | st |
| 3234 | 1 | 5 | 2.100000  | 13.895427774  | 14.882470782 | -11.994298097 | 0 | 0 | 1 | # | st |
| 3235 | 1 | 5 | 2.100000  | 11.307102986  | 16.291080796 | -11.995277170 | 0 | 0 | 1 | # | st |
| 3236 | 1 | 5 | 2.100000  | 13.895452986  | 11.836530796 | -11.995277170 | 0 | 0 | 1 | # | st |
| 3237 | 1 | 5 | 2.100000  | 14.576422226  | 16.299379218 | -6.670701903  | 0 | 0 | 1 | # | st |
| 3238 | 1 | 5 | 2.100000  | 11.988072226  | 11.844829218 | -6.670701903  | 0 | 0 | 1 | # | st |
| 3239 | 1 | 5 | 2.100000  | 11.988047014  | 14.890769204 | -6.669722830  | 0 | 0 | 1 | # | st |
| 3240 | 1 | 5 | 2.100000  | 11.307077774  | 10.427920782 | -11.994298097 | 0 | 0 | 1 | # | st |
| 3241 | 1 | 1 | 1.575000  | -12.941544971 | 10.383761568 | -9.332229368  | 1 | 0 | 1 | # | ao |
| 3242 | 1 | 1 | 1.575000  | -15.529894971 | 14.838311568 | -9.332229368  | 1 | 0 | 1 | # | ao |
| 3243 | 1 | 1 | 1.575000  | -12.941955029 | 16.343538432 | -9.332770632  | 1 | 0 | 1 | # | ao |
| 3244 | 1 | 1 | 1.575000  | -10.353605029 | 11.888988432 | -9.332770632  | 1 | 0 | 1 | # | ao |
| 3245 | 1 | 2 | 0.425000  | -11.795449128 | 13.366367322 | -7.846384937  | 1 | 0 | 1 | # | ho |
| 3246 | 1 | 2 | 0.425000  | -14.383799128 | 8.911817322  | -7.846384937  | 1 | 0 | 1 | # | ho |
| 3247 | 1 | 2 | 0.425000  | -14.088050872 | 13.360932678 | -10.818615063 | 1 | 0 | 1 | # | ho |
| 3248 | 1 | 2 | 0.425000  | -11.499700872 | 17.815482678 | -10.818615063 | 1 | 0 | 1 | # | ho |
| 3249 | 1 | 3 | -1.050000 | -14.548785345 | 10.586601481 | -10.365922068 | 1 | 0 | 1 | # | ob |
| 3250 | 1 | 3 | -1.050000 | -10.506582736 | 15.214196126 | -12.564346262 | 1 | 0 | 1 | # | ob |
| 3251 | 1 | 3 | -1.050000 | -11.959855513 | 11.682749320 | -10.366131378 | 1 | 0 | 1 | # | ob |
| 3252 | 1 | 3 | -1.050000 | -13.095260908 | 15.957810300 | -12.565579711 | 1 | 0 | 1 | # | ob |
| 3253 | 1 | 3 | -1.050000 | -14.548205513 | 16.137299320 | -10.366131378 | 1 | 0 | 1 | # | ob |
| 3254 | 1 | 3 | -1.050000 | -13.923644487 | 15.044550680 | -8.298868622  | 1 | 0 | 1 | # | ob |
| 3255 | 1 | 3 | -1.050000 | -10.506910908 | 11.503260300 | -12.565579711 | 1 | 0 | 1 | # | ob |
| 3256 | 1 | 3 | -1.050000 | -13.923064655 | 11.686148519 | -8.299077932  | 1 | 0 | 1 | # | ob |
| 3257 | 1 | 3 | -1.050000 | -12.788567264 | 15.967653874 | -6.100653738  | 1 | 0 | 1 | # | ob |
| 3258 | 1 | 3 | -1.050000 | -11.334714655 | 16.140698519 | -8.299077932  | 1 | 0 | 1 | # | ob |
| 3259 | 1 | 3 | -1.050000 | -15.376917264 | 11.513103874 | -6.100653738  | 1 | 0 | 1 | # | ob |
| 3260 | 1 | 3 | -1.050000 | -12.788239092 | 10.769489700 | -6.099420289  | 1 | 0 | 1 | # | ob |
| 3261 | 1 | 4 | -0.950000 | -13.530842343 | 8.910040996  | -8.319917115  | 1 | 0 | 1 | # | oh |
| 3262 | 1 | 3 | -1.050000 | -10.863018349 | 8.913076970  | -6.271017583  | 1 | 0 | 1 | # | ob |
| 3263 | 1 | 4 | -0.950000 | -10.942492343 | 13.364590996 | -8.319917115  | 1 | 0 | 1 | # | oh |
| 3264 | 1 | 3 | -1.050000 | -13.451368349 | 13.367626970 | -6.271017583  | 1 | 0 | 1 | # | ob |
| 3265 | 1 | 4 | -0.950000 | -12.352657657 | 17.817259004 | -10.345082885 | 1 | 0 | 1 | # | oh |
| 3266 | 1 | 3 | -1.050000 | -15.020481651 | 17.814223030 | -12.393982417 | 1 | 0 | 1 | # | ob |
| 3267 | 1 | 4 | -0.950000 | -14.941007657 | 13.362709004 | -10.345082885 | 1 | 0 | 1 | # | oh |
| 3268 | 1 | 3 | -1.050000 | -12.432131651 | 13.359673030 | -12.393982417 | 1 | 0 | 1 | # | ob |
| 3269 | 1 | 3 | -1.050000 | -11.335294487 | 10.590000680 | -8.298868622  | 1 | 0 | 1 | # | ob |
| 3270 | 1 | 3 | -1.050000 | -15.376589092 | 15.224039700 | -6.099420289  | 1 | 0 | 1 | # | ob |
| 3271 | 1 | 3 | -1.050000 | -11.960435345 | 15.041151481 | -10.365922068 | 1 | 0 | 1 | # | ob |
| 3272 | 1 | 3 | -1.050000 | -13.094932736 | 10.759646126 | -12.564346262 | 1 | 0 | 1 | # | ob |
| 3273 | 1 | 5 | 2.100000  | -11.307102986 | 10.436219204 | -6.669722830  | 1 | 0 | 1 | # | st |
| 3274 | 1 | 5 | 2.100000  | -11.988072226 | 14.882470782 | -11.994298097 | 1 | 0 | 1 | # | st |
| 3275 | 1 | 5 | 2.100000  | -14.576397014 | 16.291080796 | -11.995277170 | 1 | 0 | 1 | # | st |
| 3276 | 1 | 5 | 2.100000  | -11.988047014 | 11.836530796 | -11.995277170 | 1 | 0 | 1 | # | st |
| 3277 | 1 | 5 | 2.100000  | -11.307077774 | 16.299379218 | -6.670701903  | 1 | 0 | 1 | # | st |
| 3278 | 1 | 5 | 2.100000  | -13.895427774 | 11.844829218 | -6.670701903  | 1 | 0 | 1 | # | st |
| 3279 | 1 | 5 | 2.100000  | -13.895452986 | 14.890769204 | -6.669722830  | 1 | 0 | 1 | # | st |
| 3280 | 1 | 5 | 2.100000  | -14.576422226 | 10.427920782 | -11.994298097 | 1 | 0 | 1 | # | st |
| 3281 | 1 | 1 | 1.575000  | -7.764844971  | 10.383761568 | -9.332229368  | 1 | 0 | 1 | # | ao |
| 3282 | 1 | 1 | 1.575000  | -10.353194971 | 14.838311568 | -9.332229368  | 1 | 0 | 1 | # | ao |
| 3283 | 1 | 1 | 1.575000  | -7.765255029  | 16.343538432 | -9.332770632  | 1 | 0 | 1 | # | ao |
| 3284 | 1 | 1 | 1.575000  | -5.176905029  | 11.888988432 | -9.332770632  | 1 | 0 | 1 | # | ao |
| 3285 | 1 | 2 | 0.425000  | -6.618749128  | 13.366367322 | -7.846384937  | 1 | 0 | 1 | # | ho |
| 3286 | 1 | 2 | 0.425000  | -9.207099128  | 8.911817322  | -7.846384937  | 1 | 0 | 1 | # | ho |
| 3287 | 1 | 2 | 0.425000  | -8.911350872  | 13.360932678 | -10.818615063 | 1 | 0 | 1 | # | ho |
| 3288 | 1 | 2 | 0.425000  | -6.323000872  | 17.815482678 | -10.818615063 | 1 | 0 | 1 | # | ho |
| 3289 | 1 | 3 | -1.050000 | -9.372085345  | 10.586601481 | -10.365922068 | 1 | 0 | 1 | # | ob |
| 3290 | 1 | 3 | -1.050000 | -5.329882736  | 15.214196126 | -12.564346262 | 1 | 0 | 1 | # | ob |
| 3291 | 1 | 3 | -1.050000 | -6.783155513  | 11.682749320 | -10.366131378 | 1 | 0 | 1 | # | ob |
| 3292 | 1 | 3 | -1.050000 | -7.918560908  | 15.957810300 | -12.565579711 | 1 | 0 | 1 | # | ob |
| 3293 | 1 | 3 | -1.050000 | -9.371505513  | 16.137299320 | -10.366131378 | 1 | 0 | 1 | # | ob |
| 3294 | 1 | 3 | -1.050000 | -8.746944487  | 15.044550680 | -8.298868622  | 1 | 0 | 1 | # | ob |
| 3295 | 1 | 3 | -1.050000 | -5.330210908  | 11.503260300 | -12.565579711 | 1 | 0 | 1 | # | ob |

|      |   |   |           |               |               |               |   |   |   |   |    |
|------|---|---|-----------|---------------|---------------|---------------|---|---|---|---|----|
| 3296 | 1 | 3 | -1.050000 | -8.746364655  | 11.686148519  | -8.299077932  | 1 | 0 | 1 | # | ob |
| 3297 | 1 | 3 | -1.050000 | -7.611867264  | 15.967653874  | -6.100653738  | 1 | 0 | 1 | # | ob |
| 3298 | 1 | 3 | -1.050000 | -6.158014655  | 16.140698519  | -8.299077932  | 1 | 0 | 1 | # | ob |
| 3299 | 1 | 3 | -1.050000 | -10.200217264 | 11.513103874  | -6.100653738  | 1 | 0 | 1 | # | ob |
| 3300 | 1 | 3 | -1.050000 | -7.611539092  | 10.769489700  | -6.099420289  | 1 | 0 | 1 | # | ob |
| 3301 | 1 | 4 | -0.950000 | -8.354142343  | 8.910040996   | -8.319917115  | 1 | 0 | 1 | # | oh |
| 3302 | 1 | 3 | -1.050000 | -5.686318349  | 8.913076970   | -6.271017583  | 1 | 0 | 1 | # | ob |
| 3303 | 1 | 4 | -0.950000 | -5.765792343  | 13.364590996  | -8.319917115  | 1 | 0 | 1 | # | oh |
| 3304 | 1 | 3 | -1.050000 | -8.274668349  | 13.367626970  | -6.271017583  | 1 | 0 | 1 | # | ob |
| 3305 | 1 | 4 | -0.950000 | -7.175957657  | 17.817259004  | -10.345082885 | 1 | 0 | 1 | # | oh |
| 3306 | 1 | 3 | -1.050000 | -9.843781651  | 17.814223030  | -12.393982417 | 1 | 0 | 1 | # | ob |
| 3307 | 1 | 4 | -0.950000 | -9.764307657  | 13.362709004  | -10.345082885 | 1 | 0 | 1 | # | oh |
| 3308 | 1 | 3 | -1.050000 | -7.255431651  | 13.359673030  | -12.393982417 | 1 | 0 | 1 | # | ob |
| 3309 | 1 | 3 | -1.050000 | -6.158594487  | 10.590000680  | -8.298868622  | 1 | 0 | 1 | # | ob |
| 3310 | 1 | 3 | -1.050000 | -10.199889092 | 15.224039700  | -6.099420289  | 1 | 0 | 1 | # | ob |
| 3311 | 1 | 3 | -1.050000 | -6.783735345  | 15.041151481  | -10.365922068 | 1 | 0 | 1 | # | ob |
| 3312 | 1 | 3 | -1.050000 | -7.918232736  | 10.759646126  | -12.564346262 | 1 | 0 | 1 | # | ob |
| 3313 | 1 | 5 | 2.100000  | -6.130402986  | 10.436219204  | -6.669722830  | 1 | 0 | 1 | # | st |
| 3314 | 1 | 5 | 2.100000  | -6.811372226  | 14.882470782  | -11.994298097 | 1 | 0 | 1 | # | st |
| 3315 | 1 | 5 | 2.100000  | -9.399697014  | 16.291080796  | -11.995277170 | 1 | 0 | 1 | # | st |
| 3316 | 1 | 5 | 2.100000  | -6.811347014  | 11.836530796  | -11.995277170 | 1 | 0 | 1 | # | st |
| 3317 | 1 | 5 | 2.100000  | -6.130377774  | 16.299379218  | -6.670701903  | 1 | 0 | 1 | # | st |
| 3318 | 1 | 5 | 2.100000  | -8.718727774  | 11.844829218  | -6.670701903  | 1 | 0 | 1 | # | st |
| 3319 | 1 | 5 | 2.100000  | -8.718752986  | 14.890769204  | -6.669722830  | 1 | 0 | 1 | # | st |
| 3320 | 1 | 5 | 2.100000  | -9.399722226  | 10.427920782  | -11.994298097 | 1 | 0 | 1 | # | st |
| 3321 | 1 | 1 | 1.575000  | -2.588144971  | 10.383761568  | -9.332229368  | 1 | 0 | 1 | # | ao |
| 3322 | 1 | 1 | 1.575000  | -5.176494971  | 14.838311568  | -9.332229368  | 1 | 0 | 1 | # | ao |
| 3323 | 1 | 1 | 1.575000  | -2.588555029  | 16.343538432  | -9.332770632  | 1 | 0 | 1 | # | ao |
| 3324 | 1 | 1 | 1.575000  | -0.000205029  | 11.888988432  | -9.332770632  | 1 | 0 | 1 | # | ao |
| 3325 | 1 | 2 | 0.425000  | -1.442049128  | 13.366367322  | -7.846384937  | 1 | 0 | 1 | # | ho |
| 3326 | 1 | 2 | 0.425000  | -4.030399128  | 8.911817322   | -7.846384937  | 1 | 0 | 1 | # | ho |
| 3327 | 1 | 2 | 0.425000  | -3.734650872  | 13.360932678  | -10.818615063 | 1 | 0 | 1 | # | ho |
| 3328 | 1 | 2 | 0.425000  | -1.146300872  | 17.815482678  | -10.818615063 | 1 | 0 | 1 | # | ho |
| 3329 | 1 | 3 | -1.050000 | -4.195385345  | 10.586601481  | -10.365922068 | 1 | 0 | 1 | # | ob |
| 3330 | 1 | 3 | -1.050000 | -0.153182736  | 15.214196126  | -12.564346262 | 1 | 0 | 1 | # | ob |
| 3331 | 1 | 3 | -1.050000 | -1.606455513  | 11.682749320  | -10.366131378 | 1 | 0 | 1 | # | ob |
| 3332 | 1 | 3 | -1.050000 | -2.741860908  | 15.957810300  | -12.565579711 | 1 | 0 | 1 | # | ob |
| 3333 | 1 | 3 | -1.050000 | -4.194805513  | 16.137299320  | -10.366131378 | 1 | 0 | 1 | # | ob |
| 3334 | 1 | 3 | -1.050000 | -3.570244487  | 15.044550680  | -8.298868622  | 1 | 0 | 1 | # | ob |
| 3335 | 1 | 3 | -1.050000 | -0.153510908  | 11.503260300  | -12.565579711 | 1 | 0 | 1 | # | ob |
| 3336 | 1 | 3 | -1.050000 | -3.569664655  | 11.686148519  | -8.299077932  | 1 | 0 | 1 | # | ob |
| 3337 | 1 | 3 | -1.050000 | -2.435167264  | 15.967653874  | -6.100653738  | 1 | 0 | 1 | # | ob |
| 3338 | 1 | 3 | -1.050000 | -0.981314655  | 16.140698519  | -8.299077932  | 1 | 0 | 1 | # | ob |
| 3339 | 1 | 3 | -1.050000 | -5.023517264  | 11.513103874  | -6.100653738  | 1 | 0 | 1 | # | ob |
| 3340 | 1 | 3 | -1.050000 | -2.434839092  | 10.769489700  | -6.099420289  | 1 | 0 | 1 | # | ob |
| 3341 | 1 | 4 | -0.950000 | -3.177442343  | 8.910040996   | -8.319917115  | 1 | 0 | 1 | # | oh |
| 3342 | 1 | 3 | -1.050000 | -0.509618349  | 8.913076970   | -6.271017583  | 1 | 0 | 1 | # | ob |
| 3343 | 1 | 4 | -0.950000 | -0.589092343  | 13.364590996  | -8.319917115  | 1 | 0 | 1 | # | oh |
| 3344 | 1 | 3 | -1.050000 | -3.097968349  | 13.367626970  | -6.271017583  | 1 | 0 | 1 | # | ob |
| 3345 | 1 | 4 | -0.950000 | -1.999257657  | 17.817259004  | -10.345082885 | 1 | 0 | 1 | # | oh |
| 3346 | 1 | 3 | -1.050000 | -4.667081651  | 17.814223030  | -12.393982417 | 1 | 0 | 1 | # | ob |
| 3347 | 1 | 4 | -0.950000 | -4.587607657  | 13.362709004  | -10.345082885 | 1 | 0 | 1 | # | oh |
| 3348 | 1 | 3 | -1.050000 | -2.078731651  | 13.359673030  | -12.393982417 | 1 | 0 | 1 | # | ob |
| 3349 | 1 | 3 | -1.050000 | -0.981894487  | 10.590000680  | -8.298868622  | 1 | 0 | 1 | # | ob |
| 3350 | 1 | 3 | -1.050000 | -5.023189092  | 15.224039700  | -6.099420289  | 1 | 0 | 1 | # | ob |
| 3351 | 1 | 3 | -1.050000 | -1.607035345  | 15.041151481  | -10.365922068 | 1 | 0 | 1 | # | ob |
| 3352 | 1 | 3 | -1.050000 | -2.741532736  | 10.759646126  | -12.564346262 | 1 | 0 | 1 | # | ob |
| 3353 | 1 | 5 | 2.100000  | -0.953702986  | 10.436219204  | -6.669722830  | 1 | 0 | 1 | # | st |
| 3354 | 1 | 5 | 2.100000  | -1.634672226  | 14.882470782  | -11.994298097 | 1 | 0 | 1 | # | st |
| 3355 | 1 | 5 | 2.100000  | -4.222997014  | 16.291080796  | -11.995277170 | 1 | 0 | 1 | # | st |
| 3356 | 1 | 5 | 2.100000  | -1.634647014  | 11.836530796  | -11.995277170 | 1 | 0 | 1 | # | st |
| 3357 | 1 | 5 | 2.100000  | -0.953677774  | 16.299379218  | -6.670701903  | 1 | 0 | 1 | # | st |
| 3358 | 1 | 5 | 2.100000  | -3.542027774  | 11.844829218  | -6.670701903  | 1 | 0 | 1 | # | st |
| 3359 | 1 | 5 | 2.100000  | -3.542052986  | 14.890769204  | -6.669722830  | 1 | 0 | 1 | # | st |
| 3360 | 1 | 5 | 2.100000  | -4.223022226  | 10.427920782  | -11.994298097 | 1 | 0 | 1 | # | st |
| 3361 | 1 | 1 | 1.575000  | 2.588555029   | -16.343538432 | -9.332229368  | 0 | 1 | 1 | # | ao |
| 3362 | 1 | 1 | 1.575000  | 0.000205029   | -11.888988432 | -9.332229368  | 0 | 1 | 1 | # | ao |
| 3363 | 1 | 1 | 1.575000  | 2.588144971   | -10.383761568 | -9.332770632  | 0 | 1 | 1 | # | ao |
| 3364 | 1 | 1 | 1.575000  | 5.176494971   | -14.838311568 | -9.332770632  | 0 | 1 | 1 | # | ao |
| 3365 | 1 | 2 | 0.425000  | 3.734650872   | -13.360932678 | -7.846384937  | 0 | 1 | 1 | # | ho |
| 3366 | 1 | 2 | 0.425000  | 1.146300872   | -17.815482678 | -7.846384937  | 0 | 1 | 1 | # | ho |
| 3367 | 1 | 2 | 0.425000  | 1.442049128   | -13.366367322 | -10.818615063 | 0 | 1 | 1 | # | ho |
| 3368 | 1 | 2 | 0.425000  | 4.030399128   | -8.911817322  | -10.818615063 | 0 | 1 | 1 | # | ho |
| 3369 | 1 | 3 | -1.050000 | 0.981314655   | -16.140698519 | -10.365922068 | 0 | 1 | 1 | # | ob |
| 3370 | 1 | 3 | -1.050000 | 5.023517264   | -11.513103874 | -12.564346262 | 0 | 1 | 1 | # | ob |
| 3371 | 1 | 3 | -1.050000 | 3.570244487   | -15.044550680 | -10.366131378 | 0 | 1 | 1 | # | ob |
| 3372 | 1 | 3 | -1.050000 | 2.434839092   | -10.769489700 | -12.565579711 | 0 | 1 | 1 | # | ob |
| 3373 | 1 | 3 | -1.050000 | 0.981894487   | -10.590000680 | -10.366131378 | 0 | 1 | 1 | # | ob |
| 3374 | 1 | 3 | -1.050000 | 1.606455513   | -11.682749320 | -8.298868622  | 0 | 1 | 1 | # | ob |
| 3375 | 1 | 3 | -1.050000 | 5.023189092   | -15.224039700 | -12.565579711 | 0 | 1 | 1 | # | ob |
| 3376 | 1 | 3 | -1.050000 | 1.607035345   | -15.041151481 | -8.299077932  | 0 | 1 | 1 | # | ob |
| 3377 | 1 | 3 | -1.050000 | 2.741532736   | -10.759646126 | -6.100653738  | 0 | 1 | 1 | # | ob |
| 3378 | 1 | 3 | -1.050000 | 4.195385345   | -10.586601481 | -8.299077932  | 0 | 1 | 1 | # | ob |
| 3379 | 1 | 3 | -1.050000 | 0.153182736   | -15.214196126 | -6.100653738  | 0 | 1 | 1 | # | ob |
| 3380 | 1 | 3 | -1.050000 | 2.741860908   | -15.957810300 | -6.099420289  | 0 | 1 | 1 | # | ob |
| 3381 | 1 | 4 | -0.950000 | 1.999257657   | -17.817259004 | -8.319917115  | 0 | 1 | 1 | # | oh |
| 3382 | 1 | 3 | -1.050000 | 4.667081651   | -17.814223030 | -6.271017583  | 0 | 1 | 1 | # | ob |
| 3383 | 1 | 4 | -0.950000 | 4.587607657   | -13.362709004 | -8.319917115  | 0 | 1 | 1 | # | oh |
| 3384 | 1 | 3 | -1.050000 | 2.078731651   | -13.359673030 | -6.271017583  | 0 | 1 | 1 | # | ob |
| 3385 | 1 | 4 | -0.950000 | 3.177442343   | -8.910040996  | -10.345082885 | 0 | 1 | 1 | # | oh |
| 3386 | 1 | 3 | -1.050000 | 0.509618349   | -8.913076970  | -12.393982417 | 0 | 1 | 1 | # | ob |
| 3387 | 1 | 4 | -0.950000 | 0.589092343   | -13.364590996 | -10.345082885 | 0 | 1 | 1 | # | oh |
| 3388 | 1 | 3 | -1.050000 | 3.097968349   | -13.367626970 | -12.393982417 | 0 | 1 | 1 | # | ob |

|      |   |   |           |               |               |               |   |   |   |   |    |
|------|---|---|-----------|---------------|---------------|---------------|---|---|---|---|----|
| 3389 | 1 | 3 | -1.050000 | 4.194805513   | -16.137299320 | -8.298868622  | 0 | 1 | 1 | # | ob |
| 3390 | 1 | 3 | -1.050000 | 0.153510908   | -11.503260300 | -6.099420289  | 0 | 1 | 1 | # | ob |
| 3391 | 1 | 3 | -1.050000 | 3.569664655   | -11.686148519 | -10.365922068 | 0 | 1 | 1 | # | ob |
| 3392 | 1 | 3 | -1.050000 | 2.435167264   | -15.967653874 | -12.564346262 | 0 | 1 | 1 | # | ob |
| 3393 | 1 | 5 | 2.100000  | 4.222997014   | -16.291080796 | -6.669722830  | 0 | 1 | 1 | # | st |
| 3394 | 1 | 5 | 2.100000  | 3.542027774   | -11.844829218 | -11.994298097 | 0 | 1 | 1 | # | st |
| 3395 | 1 | 5 | 2.100000  | 0.953702986   | -10.436219204 | -11.995277170 | 0 | 1 | 1 | # | st |
| 3396 | 1 | 5 | 2.100000  | 3.542052986   | -14.890769204 | -11.995277170 | 0 | 1 | 1 | # | st |
| 3397 | 1 | 5 | 2.100000  | 4.223022226   | -10.427920782 | -6.670701903  | 0 | 1 | 1 | # | st |
| 3398 | 1 | 5 | 2.100000  | 1.634672226   | -14.882470782 | -6.670701903  | 0 | 1 | 1 | # | st |
| 3399 | 1 | 5 | 2.100000  | 1.634647014   | -11.836530796 | -6.669722830  | 0 | 1 | 1 | # | st |
| 3400 | 1 | 5 | 2.100000  | 0.953677774   | -16.299379218 | -11.994298097 | 0 | 1 | 1 | # | st |
| 3401 | 1 | 1 | 1.575000  | 7.765255029   | -16.343538432 | -9.332229368  | 0 | 1 | 1 | # | ao |
| 3402 | 1 | 1 | 1.575000  | 5.176905029   | -11.888988432 | -9.332229368  | 0 | 1 | 1 | # | ao |
| 3403 | 1 | 1 | 1.575000  | 7.764844971   | -10.383761568 | -9.332770632  | 0 | 1 | 1 | # | ao |
| 3404 | 1 | 1 | 1.575000  | 10.353194971  | -14.838311568 | -9.332770632  | 0 | 1 | 1 | # | ao |
| 3405 | 1 | 2 | 0.425000  | 8.911350872   | -13.360932678 | -7.846384937  | 0 | 1 | 1 | # | ho |
| 3406 | 1 | 2 | 0.425000  | 6.323000872   | -17.815482678 | -7.846384937  | 0 | 1 | 1 | # | ho |
| 3407 | 1 | 2 | 0.425000  | 6.618749128   | -13.366367322 | -10.818615063 | 0 | 1 | 1 | # | ho |
| 3408 | 1 | 2 | 0.425000  | 9.207099128   | -8.911817322  | -10.818615063 | 0 | 1 | 1 | # | ho |
| 3409 | 1 | 3 | -1.050000 | 6.158014655   | -16.140698519 | -10.365922068 | 0 | 1 | 1 | # | ob |
| 3410 | 1 | 3 | -1.050000 | 10.200217264  | -11.513103874 | -12.564346262 | 0 | 1 | 1 | # | ob |
| 3411 | 1 | 3 | -1.050000 | 8.746944487   | -15.044550680 | -10.366131378 | 0 | 1 | 1 | # | ob |
| 3412 | 1 | 3 | -1.050000 | 7.611539092   | -10.769489700 | -12.565579711 | 0 | 1 | 1 | # | ob |
| 3413 | 1 | 3 | -1.050000 | 6.158594487   | -10.590000680 | -10.366131378 | 0 | 1 | 1 | # | ob |
| 3414 | 1 | 3 | -1.050000 | 6.783155513   | -11.682749320 | -8.298868622  | 0 | 1 | 1 | # | ob |
| 3415 | 1 | 3 | -1.050000 | 10.199889092  | -15.224039700 | -12.565579711 | 0 | 1 | 1 | # | ob |
| 3416 | 1 | 3 | -1.050000 | 6.783735345   | -15.041151481 | -8.299077932  | 0 | 1 | 1 | # | ob |
| 3417 | 1 | 3 | -1.050000 | 7.918232736   | -10.759646126 | -6.100653738  | 0 | 1 | 1 | # | ob |
| 3418 | 1 | 3 | -1.050000 | 9.372085345   | -10.586601481 | -8.299077932  | 0 | 1 | 1 | # | ob |
| 3419 | 1 | 3 | -1.050000 | 5.329882736   | -15.214196126 | -6.100653738  | 0 | 1 | 1 | # | ob |
| 3420 | 1 | 3 | -1.050000 | 7.918560908   | -15.957810300 | -6.099420289  | 0 | 1 | 1 | # | ob |
| 3421 | 1 | 4 | -0.950000 | 7.175957657   | -17.817259004 | -8.319917115  | 0 | 1 | 1 | # | oh |
| 3422 | 1 | 3 | -1.050000 | 9.843781651   | -17.814223030 | -6.271017583  | 0 | 1 | 1 | # | ob |
| 3423 | 1 | 4 | -0.950000 | 9.764307657   | -13.362709004 | -8.319917115  | 0 | 1 | 1 | # | oh |
| 3424 | 1 | 3 | -1.050000 | 7.255431651   | -13.359673030 | -6.271017583  | 0 | 1 | 1 | # | ob |
| 3425 | 1 | 4 | -0.950000 | 8.354142343   | -8.910040996  | -10.345082885 | 0 | 1 | 1 | # | oh |
| 3426 | 1 | 3 | -1.050000 | 5.686318349   | -8.913076970  | -12.393982417 | 0 | 1 | 1 | # | ob |
| 3427 | 1 | 4 | -0.950000 | 5.765792343   | -13.364590996 | -10.345082885 | 0 | 1 | 1 | # | oh |
| 3428 | 1 | 3 | -1.050000 | 8.274668349   | -13.367626970 | -12.393982417 | 0 | 1 | 1 | # | ob |
| 3429 | 1 | 3 | -1.050000 | 9.371505513   | -16.137299320 | -8.298868622  | 0 | 1 | 1 | # | ob |
| 3430 | 1 | 3 | -1.050000 | 5.330210908   | -11.503260300 | -6.099420289  | 0 | 1 | 1 | # | ob |
| 3431 | 1 | 3 | -1.050000 | 8.746364655   | -11.686148519 | -10.365922068 | 0 | 1 | 1 | # | ob |
| 3432 | 1 | 3 | -1.050000 | 7.611867264   | -15.967653874 | -12.564346262 | 0 | 1 | 1 | # | ob |
| 3433 | 1 | 5 | 2.100000  | 9.399697014   | -16.291080796 | -6.669722830  | 0 | 1 | 1 | # | st |
| 3434 | 1 | 5 | 2.100000  | 8.718727774   | -11.844829218 | -11.994298097 | 0 | 1 | 1 | # | st |
| 3435 | 1 | 5 | 2.100000  | 6.130402986   | -10.436219204 | -11.995277170 | 0 | 1 | 1 | # | st |
| 3436 | 1 | 5 | 2.100000  | 8.718752986   | -14.890769204 | -11.995277170 | 0 | 1 | 1 | # | st |
| 3437 | 1 | 5 | 2.100000  | 9.399722226   | -10.427920782 | -6.670701903  | 0 | 1 | 1 | # | st |
| 3438 | 1 | 5 | 2.100000  | 6.811372226   | -14.882470782 | -6.670701903  | 0 | 1 | 1 | # | st |
| 3439 | 1 | 5 | 2.100000  | 6.811347014   | -11.836530796 | -6.669722830  | 0 | 1 | 1 | # | st |
| 3440 | 1 | 5 | 2.100000  | 6.130377774   | -16.299379218 | -11.994298097 | 0 | 1 | 1 | # | st |
| 3441 | 1 | 1 | 1.575000  | 12.941955029  | -16.343538432 | -9.332229368  | 0 | 1 | 1 | # | ao |
| 3442 | 1 | 1 | 1.575000  | 10.353605029  | -11.888988432 | -9.332229368  | 0 | 1 | 1 | # | ao |
| 3443 | 1 | 1 | 1.575000  | 12.941544971  | -10.383761568 | -9.332770632  | 0 | 1 | 1 | # | ao |
| 3444 | 1 | 1 | 1.575000  | 15.529894971  | -14.838311568 | -9.332770632  | 0 | 1 | 1 | # | ao |
| 3445 | 1 | 2 | 0.425000  | 14.088050872  | -13.360932678 | -7.846384937  | 0 | 1 | 1 | # | ho |
| 3446 | 1 | 2 | 0.425000  | 11.499700872  | -17.815482678 | -7.846384937  | 0 | 1 | 1 | # | ho |
| 3447 | 1 | 2 | 0.425000  | 11.795449128  | -13.366367322 | -10.818615063 | 0 | 1 | 1 | # | ho |
| 3448 | 1 | 2 | 0.425000  | 14.383799128  | -8.911817322  | -10.818615063 | 0 | 1 | 1 | # | ho |
| 3449 | 1 | 3 | -1.050000 | 11.334714655  | -16.140698519 | -10.365922068 | 0 | 1 | 1 | # | ob |
| 3450 | 1 | 3 | -1.050000 | 15.376917264  | -11.513103874 | -12.564346262 | 0 | 1 | 1 | # | ob |
| 3451 | 1 | 3 | -1.050000 | 13.923644487  | -15.044550680 | -10.366131378 | 0 | 1 | 1 | # | ob |
| 3452 | 1 | 3 | -1.050000 | 12.788239092  | -10.769489700 | -12.565579711 | 0 | 1 | 1 | # | ob |
| 3453 | 1 | 3 | -1.050000 | 11.335294487  | -10.590000680 | -10.366131378 | 0 | 1 | 1 | # | ob |
| 3454 | 1 | 3 | -1.050000 | 11.959855513  | -11.682749320 | -8.298868622  | 0 | 1 | 1 | # | ob |
| 3455 | 1 | 3 | -1.050000 | 15.376589092  | -15.224039700 | -12.565579711 | 0 | 1 | 1 | # | ob |
| 3456 | 1 | 3 | -1.050000 | 11.960435345  | -15.041151481 | -8.299077932  | 0 | 1 | 1 | # | ob |
| 3457 | 1 | 3 | -1.050000 | 13.094932736  | -10.759646126 | -6.100653738  | 0 | 1 | 1 | # | ob |
| 3458 | 1 | 3 | -1.050000 | 14.548785345  | -10.586601481 | -8.299077932  | 0 | 1 | 1 | # | ob |
| 3459 | 1 | 3 | -1.050000 | 10.506582736  | -15.214196126 | -6.100653738  | 0 | 1 | 1 | # | ob |
| 3460 | 1 | 3 | -1.050000 | 13.095260908  | -15.957810300 | -6.099420289  | 0 | 1 | 1 | # | ob |
| 3461 | 1 | 4 | -0.950000 | 12.352657657  | -17.817259004 | -8.319917115  | 0 | 1 | 1 | # | oh |
| 3462 | 1 | 3 | -1.050000 | 15.020481651  | -17.814223030 | -6.271017583  | 0 | 1 | 1 | # | ob |
| 3463 | 1 | 4 | -0.950000 | 14.941007657  | -13.362709004 | -8.319917115  | 0 | 1 | 1 | # | oh |
| 3464 | 1 | 3 | -1.050000 | 12.432131651  | -13.359673030 | -6.271017583  | 0 | 1 | 1 | # | ob |
| 3465 | 1 | 4 | -0.950000 | 13.530842343  | -8.910040996  | -10.345082885 | 0 | 1 | 1 | # | oh |
| 3466 | 1 | 3 | -1.050000 | 10.863018349  | -8.913076970  | -12.393982417 | 0 | 1 | 1 | # | ob |
| 3467 | 1 | 4 | -0.950000 | 10.942492343  | -13.364590996 | -10.345082885 | 0 | 1 | 1 | # | oh |
| 3468 | 1 | 3 | -1.050000 | 13.451368349  | -13.367626970 | -12.393982417 | 0 | 1 | 1 | # | ob |
| 3469 | 1 | 3 | -1.050000 | 14.548205513  | -16.137299320 | -8.298868622  | 0 | 1 | 1 | # | ob |
| 3470 | 1 | 3 | -1.050000 | 10.506910908  | -11.503260300 | -6.099420289  | 0 | 1 | 1 | # | ob |
| 3471 | 1 | 3 | -1.050000 | 13.923064655  | -11.686148519 | -10.365922068 | 0 | 1 | 1 | # | ob |
| 3472 | 1 | 3 | -1.050000 | 12.788567264  | -15.967653874 | -12.564346262 | 0 | 1 | 1 | # | ob |
| 3473 | 1 | 5 | 2.100000  | 14.576397014  | -16.291080796 | -6.669722830  | 0 | 1 | 1 | # | st |
| 3474 | 1 | 5 | 2.100000  | 13.895427774  | -11.844829218 | -11.994298097 | 0 | 1 | 1 | # | st |
| 3475 | 1 | 5 | 2.100000  | 11.307102986  | -10.436219204 | -11.995277170 | 0 | 1 | 1 | # | st |
| 3476 | 1 | 5 | 2.100000  | 13.895452986  | -14.890769204 | -11.995277170 | 0 | 1 | 1 | # | st |
| 3477 | 1 | 5 | 2.100000  | 14.576422226  | -10.427920782 | -6.670701903  | 0 | 1 | 1 | # | st |
| 3478 | 1 | 5 | 2.100000  | 11.988072226  | -14.882470782 | -6.670701903  | 0 | 1 | 1 | # | st |
| 3479 | 1 | 5 | 2.100000  | 11.988047014  | -11.836530796 | -6.669722830  | 0 | 1 | 1 | # | st |
| 3480 | 1 | 5 | 2.100000  | 11.307077774  | -16.299379218 | -11.994298097 | 0 | 1 | 1 | # | st |
| 3481 | 1 | 1 | 1.575000  | -12.941544971 | -16.343538432 | -9.332229368  | 1 | 1 | 1 | # | ao |

|      |   |   |           |               |               |               |   |   |   |   |    |
|------|---|---|-----------|---------------|---------------|---------------|---|---|---|---|----|
| 3482 | 1 | 1 | 1.575000  | -15.529894971 | -11.888988432 | -9.332229368  | 1 | 1 | 1 | # | ao |
| 3483 | 1 | 1 | 1.575000  | -12.941955029 | -10.383761568 | -9.332770632  | 1 | 1 | 1 | # | ao |
| 3484 | 1 | 1 | 1.575000  | -10.353605029 | -14.838311568 | -9.332770632  | 1 | 1 | 1 | # | ao |
| 3485 | 1 | 2 | 0.425000  | -11.795449128 | -13.360932678 | -7.846384937  | 1 | 1 | 1 | # | ho |
| 3486 | 1 | 2 | 0.425000  | -14.383799128 | -17.815482678 | -7.846384937  | 1 | 1 | 1 | # | ho |
| 3487 | 1 | 2 | 0.425000  | -14.088050872 | -13.366367322 | -10.818615063 | 1 | 1 | 1 | # | ho |
| 3488 | 1 | 2 | 0.425000  | -11.499700872 | -8.911817322  | -10.818615063 | 1 | 1 | 1 | # | ho |
| 3489 | 1 | 3 | -1.050000 | -14.548785345 | -16.140698519 | -10.365922068 | 1 | 1 | 1 | # | ob |
| 3490 | 1 | 3 | -1.050000 | -10.506582736 | -11.513103874 | -12.564346262 | 1 | 1 | 1 | # | ob |
| 3491 | 1 | 3 | -1.050000 | -11.959855513 | -15.044550680 | -10.366131378 | 1 | 1 | 1 | # | ob |
| 3492 | 1 | 3 | -1.050000 | -13.095260908 | -10.769489700 | -12.565579711 | 1 | 1 | 1 | # | ob |
| 3493 | 1 | 3 | -1.050000 | -14.548205513 | -10.590000680 | -10.366131378 | 1 | 1 | 1 | # | ob |
| 3494 | 1 | 3 | -1.050000 | -13.923644487 | -11.682749320 | -8.298868622  | 1 | 1 | 1 | # | ob |
| 3495 | 1 | 3 | -1.050000 | -10.506910908 | -15.224039700 | -12.565579711 | 1 | 1 | 1 | # | ob |
| 3496 | 1 | 3 | -1.050000 | -13.923064655 | -15.041151481 | -8.299077932  | 1 | 1 | 1 | # | ob |
| 3497 | 1 | 3 | -1.050000 | -12.788567264 | -10.759646126 | -6.100653738  | 1 | 1 | 1 | # | ob |
| 3498 | 1 | 3 | -1.050000 | -11.334714655 | -10.586601481 | -8.299077932  | 1 | 1 | 1 | # | ob |
| 3499 | 1 | 3 | -1.050000 | -15.376917264 | -15.214196126 | -6.100653738  | 1 | 1 | 1 | # | ob |
| 3500 | 1 | 3 | -1.050000 | -12.788239092 | -15.957810300 | -6.099420289  | 1 | 1 | 1 | # | ob |
| 3501 | 1 | 4 | -0.950000 | -13.530842343 | -17.817259004 | -8.319917115  | 1 | 1 | 1 | # | oh |
| 3502 | 1 | 3 | -1.050000 | -10.863018349 | -17.814223030 | -6.271017583  | 1 | 1 | 1 | # | ob |
| 3503 | 1 | 4 | -0.950000 | -10.942492343 | -13.362709004 | -8.319917115  | 1 | 1 | 1 | # | oh |
| 3504 | 1 | 3 | -1.050000 | -13.451368349 | -13.359673030 | -6.271017583  | 1 | 1 | 1 | # | ob |
| 3505 | 1 | 4 | -0.950000 | -12.352657657 | -8.910040996  | -10.345082885 | 1 | 1 | 1 | # | oh |
| 3506 | 1 | 3 | -1.050000 | -15.020481651 | -8.913076970  | -12.393982417 | 1 | 1 | 1 | # | ob |
| 3507 | 1 | 4 | -0.950000 | -14.941007657 | -13.364590996 | -10.345082885 | 1 | 1 | 1 | # | oh |
| 3508 | 1 | 3 | -1.050000 | -12.432131651 | -13.367626970 | -12.393982417 | 1 | 1 | 1 | # | ob |
| 3509 | 1 | 3 | -1.050000 | -11.335294487 | -16.137299320 | -8.298868622  | 1 | 1 | 1 | # | ob |
| 3510 | 1 | 3 | -1.050000 | -15.376589092 | -11.503260300 | -6.099420289  | 1 | 1 | 1 | # | ob |
| 3511 | 1 | 3 | -1.050000 | -11.960435345 | -11.686148519 | -10.365922068 | 1 | 1 | 1 | # | ob |
| 3512 | 1 | 3 | -1.050000 | -13.094932736 | -15.967653874 | -12.564346262 | 1 | 1 | 1 | # | ob |
| 3513 | 1 | 5 | 2.100000  | -11.307102986 | -16.291080796 | -6.669722830  | 1 | 1 | 1 | # | st |
| 3514 | 1 | 5 | 2.100000  | -11.988072226 | -11.844829218 | -11.994298097 | 1 | 1 | 1 | # | st |
| 3515 | 1 | 5 | 2.100000  | -14.576397014 | -10.436219204 | -11.995277170 | 1 | 1 | 1 | # | st |
| 3516 | 1 | 5 | 2.100000  | -11.988047014 | -14.890769204 | -11.995277170 | 1 | 1 | 1 | # | st |
| 3517 | 1 | 5 | 2.100000  | -11.307077774 | -10.427920782 | -6.670701903  | 1 | 1 | 1 | # | st |
| 3518 | 1 | 5 | 2.100000  | -13.895427774 | -14.882470782 | -6.670701903  | 1 | 1 | 1 | # | st |
| 3519 | 1 | 5 | 2.100000  | -13.895452986 | -11.836530796 | -6.669722830  | 1 | 1 | 1 | # | st |
| 3520 | 1 | 5 | 2.100000  | -14.576422226 | -16.299379218 | -11.994298097 | 1 | 1 | 1 | # | st |
| 3521 | 1 | 1 | 1.575000  | -7.764844971  | -16.343538432 | -9.332229368  | 1 | 1 | 1 | # | ao |
| 3522 | 1 | 1 | 1.575000  | -10.353194971 | -11.888988432 | -9.332229368  | 1 | 1 | 1 | # | ao |
| 3523 | 1 | 1 | 1.575000  | -7.765255029  | -10.383761568 | -9.332770632  | 1 | 1 | 1 | # | ao |
| 3524 | 1 | 1 | 1.575000  | -5.176905029  | -14.838311568 | -9.332770632  | 1 | 1 | 1 | # | ao |
| 3525 | 1 | 2 | 0.425000  | -6.618749128  | -13.360932678 | -7.846384937  | 1 | 1 | 1 | # | ho |
| 3526 | 1 | 2 | 0.425000  | -9.207099128  | -17.815482678 | -7.846384937  | 1 | 1 | 1 | # | ho |
| 3527 | 1 | 2 | 0.425000  | -8.911350872  | -13.366367322 | -10.818615063 | 1 | 1 | 1 | # | ho |
| 3528 | 1 | 2 | 0.425000  | -6.323000872  | -8.911817322  | -10.818615063 | 1 | 1 | 1 | # | ho |
| 3529 | 1 | 3 | -1.050000 | -9.372085345  | -16.140698519 | -10.365922068 | 1 | 1 | 1 | # | ob |
| 3530 | 1 | 3 | -1.050000 | -5.329882736  | -11.513103874 | -12.564346262 | 1 | 1 | 1 | # | ob |
| 3531 | 1 | 3 | -1.050000 | -6.783155513  | -15.044550680 | -10.366131378 | 1 | 1 | 1 | # | ob |
| 3532 | 1 | 3 | -1.050000 | -7.918560908  | -10.769489700 | -12.565579711 | 1 | 1 | 1 | # | ob |
| 3533 | 1 | 3 | -1.050000 | -9.371505513  | -10.590000680 | -10.366131378 | 1 | 1 | 1 | # | ob |
| 3534 | 1 | 3 | -1.050000 | -8.746944487  | -11.682749320 | -8.298868622  | 1 | 1 | 1 | # | ob |
| 3535 | 1 | 3 | -1.050000 | -5.330210908  | -15.224039700 | -12.565579711 | 1 | 1 | 1 | # | ob |
| 3536 | 1 | 3 | -1.050000 | -8.746364655  | -15.041151481 | -8.299077932  | 1 | 1 | 1 | # | ob |
| 3537 | 1 | 3 | -1.050000 | -7.611867264  | -10.759646126 | -6.100653738  | 1 | 1 | 1 | # | ob |
| 3538 | 1 | 3 | -1.050000 | -6.158014655  | -10.586601481 | -8.299077932  | 1 | 1 | 1 | # | ob |
| 3539 | 1 | 3 | -1.050000 | -10.200217264 | -15.214196126 | -6.100653738  | 1 | 1 | 1 | # | ob |
| 3540 | 1 | 3 | -1.050000 | -7.611539092  | -15.957810300 | -6.099420289  | 1 | 1 | 1 | # | ob |
| 3541 | 1 | 4 | -0.950000 | -8.354142343  | -17.817259004 | -8.319917115  | 1 | 1 | 1 | # | oh |
| 3542 | 1 | 3 | -1.050000 | -5.686318349  | -17.814223030 | -6.271017583  | 1 | 1 | 1 | # | ob |
| 3543 | 1 | 4 | -0.950000 | -5.765792343  | -13.362709004 | -8.319917115  | 1 | 1 | 1 | # | oh |
| 3544 | 1 | 3 | -1.050000 | -8.274668349  | -13.359673030 | -6.271017583  | 1 | 1 | 1 | # | ob |
| 3545 | 1 | 4 | -0.950000 | -7.175957657  | -8.910040996  | -10.345082885 | 1 | 1 | 1 | # | oh |
| 3546 | 1 | 3 | -1.050000 | -9.843781651  | -8.913076970  | -12.393982417 | 1 | 1 | 1 | # | ob |
| 3547 | 1 | 4 | -0.950000 | -9.764307657  | -13.364590996 | -10.345082885 | 1 | 1 | 1 | # | oh |
| 3548 | 1 | 3 | -1.050000 | -7.255431651  | -13.367626970 | -12.393982417 | 1 | 1 | 1 | # | ob |
| 3549 | 1 | 3 | -1.050000 | -6.158594487  | -16.137299320 | -8.298868622  | 1 | 1 | 1 | # | ob |
| 3550 | 1 | 3 | -1.050000 | -10.199889092 | -11.503260300 | -6.099420289  | 1 | 1 | 1 | # | ob |
| 3551 | 1 | 3 | -1.050000 | -6.783735345  | -11.686148519 | -10.365922068 | 1 | 1 | 1 | # | ob |
| 3552 | 1 | 3 | -1.050000 | -7.918232736  | -15.967653874 | -12.564346262 | 1 | 1 | 1 | # | ob |
| 3553 | 1 | 5 | 2.100000  | -6.130402986  | -16.291080796 | -6.669722830  | 1 | 1 | 1 | # | st |
| 3554 | 1 | 5 | 2.100000  | -6.811372226  | -11.844829218 | -11.994298097 | 1 | 1 | 1 | # | st |
| 3555 | 1 | 5 | 2.100000  | -9.399697014  | -10.436219204 | -11.995277170 | 1 | 1 | 1 | # | st |
| 3556 | 1 | 5 | 2.100000  | -6.811347014  | -14.890769204 | -11.995277170 | 1 | 1 | 1 | # | st |
| 3557 | 1 | 5 | 2.100000  | -6.130377774  | -10.427920782 | -6.670701903  | 1 | 1 | 1 | # | st |
| 3558 | 1 | 5 | 2.100000  | -8.718727774  | -14.882470782 | -6.670701903  | 1 | 1 | 1 | # | st |
| 3559 | 1 | 5 | 2.100000  | -8.718752986  | -11.836530796 | -6.669722830  | 1 | 1 | 1 | # | st |
| 3560 | 1 | 5 | 2.100000  | -9.399722226  | -16.299379218 | -11.994298097 | 1 | 1 | 1 | # | st |
| 3561 | 1 | 1 | 1.575000  | -2.588144971  | -16.343538432 | -9.332229368  | 1 | 1 | 1 | # | ao |
| 3562 | 1 | 1 | 1.575000  | -5.176494971  | -11.888988432 | -9.332229368  | 1 | 1 | 1 | # | ao |
| 3563 | 1 | 1 | 1.575000  | -2.588555029  | -10.383761568 | -9.332770632  | 1 | 1 | 1 | # | ao |
| 3564 | 1 | 1 | 1.575000  | -0.000205029  | -14.838311568 | -9.332770632  | 1 | 1 | 1 | # | ao |
| 3565 | 1 | 2 | 0.425000  | -1.442049128  | -13.360932678 | -7.846384937  | 1 | 1 | 1 | # | ho |
| 3566 | 1 | 2 | 0.425000  | -4.030399128  | -17.815482678 | -7.846384937  | 1 | 1 | 1 | # | ho |
| 3567 | 1 | 2 | 0.425000  | -3.734650872  | -13.366367322 | -10.818615063 | 1 | 1 | 1 | # | ho |
| 3568 | 1 | 2 | 0.425000  | -1.146300872  | -8.911817322  | -10.818615063 | 1 | 1 | 1 | # | ho |
| 3569 | 1 | 3 | -1.050000 | -4.195385345  | -16.140698519 | -10.365922068 | 1 | 1 | 1 | # | ob |
| 3570 | 1 | 3 | -1.050000 | -0.153182736  | -11.513103874 | -12.564346262 | 1 | 1 | 1 | # | ob |
| 3571 | 1 | 3 | -1.050000 | -1.606455513  | -15.044550680 | -10.366131378 | 1 | 1 | 1 | # | ob |
| 3572 | 1 | 3 | -1.050000 | -2.741860908  | -10.769489700 | -12.565579711 | 1 | 1 | 1 | # | ob |
| 3573 | 1 | 3 | -1.050000 | -4.194805513  | -10.590000680 | -10.366131378 | 1 | 1 | 1 | # | ob |
| 3574 | 1 | 3 | -1.050000 | -3.570244487  | -11.682749320 | -8.298868622  | 1 | 1 | 1 | # | ob |

|      |   |   |           |              |               |               |   |   |   |   |    |
|------|---|---|-----------|--------------|---------------|---------------|---|---|---|---|----|
| 3575 | 1 | 3 | -1.050000 | -0.153510908 | -15.224039700 | -12.565579711 | 1 | 1 | 1 | # | ob |
| 3576 | 1 | 3 | -1.050000 | -3.569664655 | -15.041151481 | -8.299077932  | 1 | 1 | 1 | # | ob |
| 3577 | 1 | 3 | -1.050000 | -2.435167264 | -10.759646126 | -6.100653738  | 1 | 1 | 1 | # | ob |
| 3578 | 1 | 3 | -1.050000 | -0.981314655 | -10.586601481 | -8.299077932  | 1 | 1 | 1 | # | ob |
| 3579 | 1 | 3 | -1.050000 | -5.023517264 | -15.214196126 | -6.100653738  | 1 | 1 | 1 | # | ob |
| 3580 | 1 | 3 | -1.050000 | -2.434839092 | -15.957810300 | -6.099420289  | 1 | 1 | 1 | # | ob |
| 3581 | 1 | 4 | -0.950000 | -3.177442343 | -17.817259004 | -8.319917115  | 1 | 1 | 1 | # | oh |
| 3582 | 1 | 3 | -1.050000 | -0.509618349 | -17.814223030 | -6.271017583  | 1 | 1 | 1 | # | ob |
| 3583 | 1 | 4 | -0.950000 | -0.589092343 | -13.362709004 | -8.319917115  | 1 | 1 | 1 | # | oh |
| 3584 | 1 | 3 | -1.050000 | -3.097968349 | -13.359673030 | -6.271017583  | 1 | 1 | 1 | # | ob |
| 3585 | 1 | 4 | -0.950000 | -1.999257657 | -8.910040996  | -10.345082885 | 1 | 1 | 1 | # | oh |
| 3586 | 1 | 3 | -1.050000 | -4.667081651 | -8.913076970  | -12.393982417 | 1 | 1 | 1 | # | ob |
| 3587 | 1 | 4 | -0.950000 | -4.587607657 | -13.364590996 | -10.345082885 | 1 | 1 | 1 | # | oh |
| 3588 | 1 | 3 | -1.050000 | -2.078731651 | -13.367626970 | -12.393982417 | 1 | 1 | 1 | # | ob |
| 3589 | 1 | 3 | -1.050000 | -0.981894487 | -16.137299320 | -8.298868622  | 1 | 1 | 1 | # | ob |
| 3590 | 1 | 3 | -1.050000 | -5.023189092 | -11.503260300 | -6.099420289  | 1 | 1 | 1 | # | ob |
| 3591 | 1 | 3 | -1.050000 | -1.607035345 | -11.686148519 | -10.365922068 | 1 | 1 | 1 | # | ob |
| 3592 | 1 | 3 | -1.050000 | -2.741532736 | -15.967653874 | -12.564346262 | 1 | 1 | 1 | # | ob |
| 3593 | 1 | 5 | 2.100000  | -0.953702986 | -16.291080796 | -6.669722830  | 1 | 1 | 1 | # | st |
| 3594 | 1 | 5 | 2.100000  | -1.634672226 | -11.844829218 | -11.994298097 | 1 | 1 | 1 | # | st |
| 3595 | 1 | 5 | 2.100000  | -4.222997014 | -10.436219204 | -11.995277170 | 1 | 1 | 1 | # | st |
| 3596 | 1 | 5 | 2.100000  | -1.634647014 | -14.890769204 | -11.995277170 | 1 | 1 | 1 | # | st |
| 3597 | 1 | 5 | 2.100000  | -0.953677774 | -10.427920782 | -6.670701903  | 1 | 1 | 1 | # | st |
| 3598 | 1 | 5 | 2.100000  | -3.542027774 | -14.882470782 | -6.670701903  | 1 | 1 | 1 | # | st |
| 3599 | 1 | 5 | 2.100000  | -3.542052986 | -11.836530796 | -6.669722830  | 1 | 1 | 1 | # | st |
| 3600 | 1 | 5 | 2.100000  | -4.223022226 | -16.299379218 | -11.994298097 | 1 | 1 | 1 | # | st |
| 3601 | 1 | 1 | 1.575000  | 2.588555029  | -7.434438432  | -9.332229368  | 0 | 1 | 1 | # | ao |
| 3602 | 1 | 1 | 1.575000  | 0.000205029  | -2.979888432  | -9.332229368  | 0 | 1 | 1 | # | ao |
| 3603 | 1 | 1 | 1.575000  | 2.588144971  | -1.474661568  | -9.332770632  | 0 | 1 | 1 | # | ao |
| 3604 | 1 | 1 | 1.575000  | 5.176494971  | -5.929211568  | -9.332770632  | 0 | 1 | 1 | # | ao |
| 3605 | 1 | 2 | 0.425000  | 3.734650872  | -4.451832678  | -7.846384937  | 0 | 1 | 1 | # | ho |
| 3606 | 1 | 2 | 0.425000  | 1.146300872  | -8.906382678  | -7.846384937  | 0 | 1 | 1 | # | ho |
| 3607 | 1 | 2 | 0.425000  | 1.442049128  | -4.457267322  | -10.818615063 | 0 | 1 | 1 | # | ho |
| 3608 | 1 | 2 | 0.425000  | 4.030399128  | -0.002717322  | -10.818615063 | 0 | 1 | 1 | # | ho |
| 3609 | 1 | 3 | -1.050000 | 0.981314655  | -7.231598519  | -10.365922068 | 0 | 1 | 1 | # | ob |
| 3610 | 1 | 3 | -1.050000 | 5.023517264  | -2.604003874  | -12.564346262 | 0 | 1 | 1 | # | ob |
| 3611 | 1 | 3 | -1.050000 | 3.570244487  | -6.135450680  | -10.366131378 | 0 | 1 | 1 | # | ob |
| 3612 | 1 | 3 | -1.050000 | 2.434839092  | -1.860389700  | -12.565579711 | 0 | 1 | 1 | # | ob |
| 3613 | 1 | 3 | -1.050000 | 0.981894487  | -1.680900680  | -10.366131378 | 0 | 1 | 1 | # | ob |
| 3614 | 1 | 3 | -1.050000 | 1.606455513  | -2.773649320  | -8.298868622  | 0 | 1 | 1 | # | ob |
| 3615 | 1 | 3 | -1.050000 | 5.023189092  | -6.314939700  | -12.565579711 | 0 | 1 | 1 | # | ob |
| 3616 | 1 | 3 | -1.050000 | 1.607035345  | -6.132051481  | -8.299077932  | 0 | 1 | 1 | # | ob |
| 3617 | 1 | 3 | -1.050000 | 2.741532736  | -1.850546126  | -6.100653738  | 0 | 1 | 1 | # | ob |
| 3618 | 1 | 3 | -1.050000 | 4.195385345  | -1.677501481  | -8.299077932  | 0 | 1 | 1 | # | ob |
| 3619 | 1 | 3 | -1.050000 | 0.153182736  | -6.305096126  | -6.100653738  | 0 | 1 | 1 | # | ob |
| 3620 | 1 | 3 | -1.050000 | 2.741860908  | -7.048710300  | -6.099420289  | 0 | 1 | 1 | # | ob |
| 3621 | 1 | 4 | -0.950000 | 1.999257657  | -8.908159004  | -8.319917115  | 0 | 1 | 1 | # | oh |
| 3622 | 1 | 3 | -1.050000 | 4.667081651  | -8.905123030  | -6.271017583  | 0 | 1 | 1 | # | ob |
| 3623 | 1 | 4 | -0.950000 | 4.587607657  | -4.453609004  | -8.319917115  | 0 | 1 | 1 | # | oh |
| 3624 | 1 | 3 | -1.050000 | 2.078731651  | -4.450573030  | -6.271017583  | 0 | 1 | 1 | # | ob |
| 3625 | 1 | 4 | -0.950000 | 3.177442343  | -0.000940996  | -10.345082885 | 0 | 1 | 1 | # | oh |
| 3626 | 1 | 3 | -1.050000 | 0.509618349  | -0.003976970  | -12.393982417 | 0 | 1 | 1 | # | ob |
| 3627 | 1 | 4 | -0.950000 | 0.589092343  | -4.455490996  | -10.345082885 | 0 | 1 | 1 | # | oh |
| 3628 | 1 | 3 | -1.050000 | 3.097968349  | -4.458526970  | -12.393982417 | 0 | 1 | 1 | # | ob |
| 3629 | 1 | 3 | -1.050000 | 4.194805513  | -7.228199320  | -8.298868622  | 0 | 1 | 1 | # | ob |
| 3630 | 1 | 3 | -1.050000 | 0.153510908  | -2.594160300  | -6.099420289  | 0 | 1 | 1 | # | ob |
| 3631 | 1 | 3 | -1.050000 | 3.569664655  | -2.777048519  | -10.365922068 | 0 | 1 | 1 | # | ob |
| 3632 | 1 | 3 | -1.050000 | 2.435167264  | -7.058553874  | -12.564346262 | 0 | 1 | 1 | # | ob |
| 3633 | 1 | 5 | 2.100000  | 4.222997014  | -7.381980796  | -6.669722830  | 0 | 1 | 1 | # | st |
| 3634 | 1 | 5 | 2.100000  | 3.542027774  | -2.935729218  | -11.994298097 | 0 | 1 | 1 | # | st |
| 3635 | 1 | 5 | 2.100000  | 0.953702986  | -1.527119204  | -11.995277170 | 0 | 1 | 1 | # | st |
| 3636 | 1 | 5 | 2.100000  | 3.542052986  | -5.981669204  | -11.995277170 | 0 | 1 | 1 | # | st |
| 3637 | 1 | 5 | 2.100000  | 4.223022226  | -1.518820782  | -6.670701903  | 0 | 1 | 1 | # | st |
| 3638 | 1 | 5 | 2.100000  | 1.634672226  | -5.973370782  | -6.670701903  | 0 | 1 | 1 | # | st |
| 3639 | 1 | 5 | 2.100000  | 1.634647014  | -2.927430796  | -6.669722830  | 0 | 1 | 1 | # | st |
| 3640 | 1 | 5 | 2.100000  | 0.953677774  | -7.390279218  | -11.994298097 | 0 | 1 | 1 | # | st |
| 3641 | 1 | 1 | 1.575000  | 7.765255029  | -7.434438432  | -9.332229368  | 0 | 1 | 1 | # | ao |
| 3642 | 1 | 1 | 1.575000  | 5.176905029  | -2.979888432  | -9.332229368  | 0 | 1 | 1 | # | ao |
| 3643 | 1 | 1 | 1.575000  | 7.764844971  | -1.474661568  | -9.332770632  | 0 | 1 | 1 | # | ao |
| 3644 | 1 | 1 | 1.575000  | 10.353194971 | -5.929211568  | -9.332770632  | 0 | 1 | 1 | # | ao |
| 3645 | 1 | 2 | 0.425000  | 8.911350872  | -4.451832678  | -7.846384937  | 0 | 1 | 1 | # | ho |
| 3646 | 1 | 2 | 0.425000  | 6.323000872  | -8.906382678  | -7.846384937  | 0 | 1 | 1 | # | ho |
| 3647 | 1 | 2 | 0.425000  | 6.618749128  | -4.457267322  | -10.818615063 | 0 | 1 | 1 | # | ho |
| 3648 | 1 | 2 | 0.425000  | 9.207099128  | -0.002717322  | -10.818615063 | 0 | 1 | 1 | # | ho |
| 3649 | 1 | 3 | -1.050000 | 6.158014655  | -7.231598519  | -10.365922068 | 0 | 1 | 1 | # | ob |
| 3650 | 1 | 3 | -1.050000 | 10.200217264 | -2.604003874  | -12.564346262 | 0 | 1 | 1 | # | ob |
| 3651 | 1 | 3 | -1.050000 | 8.746944487  | -6.135450680  | -10.366131378 | 0 | 1 | 1 | # | ob |
| 3652 | 1 | 3 | -1.050000 | 7.611539092  | -1.860389700  | -12.565579711 | 0 | 1 | 1 | # | ob |
| 3653 | 1 | 3 | -1.050000 | 6.158594487  | -1.680900680  | -10.366131378 | 0 | 1 | 1 | # | ob |
| 3654 | 1 | 3 | -1.050000 | 6.783155513  | -2.773649320  | -8.298868622  | 0 | 1 | 1 | # | ob |
| 3655 | 1 | 3 | -1.050000 | 10.199889092 | -6.314939700  | -12.565579711 | 0 | 1 | 1 | # | ob |
| 3656 | 1 | 3 | -1.050000 | 6.783735345  | -6.132051481  | -8.299077932  | 0 | 1 | 1 | # | ob |
| 3657 | 1 | 3 | -1.050000 | 7.918232736  | -1.850546126  | -6.100653738  | 0 | 1 | 1 | # | ob |
| 3658 | 1 | 3 | -1.050000 | 9.372085345  | -1.677501481  | -8.299077932  | 0 | 1 | 1 | # | ob |
| 3659 | 1 | 3 | -1.050000 | 5.329882736  | -6.305096126  | -6.100653738  | 0 | 1 | 1 | # | ob |
| 3660 | 1 | 3 | -1.050000 | 7.918560908  | -7.048710300  | -6.099420289  | 0 | 1 | 1 | # | ob |
| 3661 | 1 | 4 | -0.950000 | 7.175957657  | -8.908159004  | -8.319917115  | 0 | 1 | 1 | # | oh |
| 3662 | 1 | 3 | -1.050000 | 9.843781651  | -8.905123030  | -6.271017583  | 0 | 1 | 1 | # | ob |
| 3663 | 1 | 4 | -0.950000 | 9.764307657  | -4.453609004  | -8.319917115  | 0 | 1 | 1 | # | oh |
| 3664 | 1 | 3 | -1.050000 | 7.255431651  | -4.450573030  | -6.271017583  | 0 | 1 | 1 | # | ob |
| 3665 | 1 | 4 | -0.950000 | 8.354142343  | -0.000940996  | -10.345082885 | 0 | 1 | 1 | # | oh |
| 3666 | 1 | 3 | -1.050000 | 5.686318349  | -0.003976970  | -12.393982417 | 0 | 1 | 1 | # | ob |
| 3667 | 1 | 4 | -0.950000 | 5.765792343  | -4.455490996  | -10.345082885 | 0 | 1 | 1 | # | oh |



|      |   |   |           |               |              |               |   |   |   |   |    |
|------|---|---|-----------|---------------|--------------|---------------|---|---|---|---|----|
| 3668 | 1 | 3 | -1.050000 | 8.274668349   | -4.458526970 | -12.393982417 | 0 | 1 | 1 | # | ob |
| 3669 | 1 | 3 | -1.050000 | 9.371505513   | -7.228199320 | -8.298868622  | 0 | 1 | 1 | # | ob |
| 3670 | 1 | 3 | -1.050000 | 5.330210908   | -2.594160300 | -6.099420289  | 0 | 1 | 1 | # | ob |
| 3671 | 1 | 3 | -1.050000 | 8.746364655   | -2.777048519 | -10.365922068 | 0 | 1 | 1 | # | ob |
| 3672 | 1 | 3 | -1.050000 | 7.611867264   | -7.058553874 | -12.564346262 | 0 | 1 | 1 | # | ob |
| 3673 | 1 | 5 | 2.100000  | 9.399697014   | -7.381980796 | -6.669722830  | 0 | 1 | 1 | # | st |
| 3674 | 1 | 5 | 2.100000  | 8.718727774   | -2.935729218 | -11.994298097 | 0 | 1 | 1 | # | st |
| 3675 | 1 | 5 | 2.100000  | 6.130402986   | -1.527119204 | -11.995277170 | 0 | 1 | 1 | # | st |
| 3676 | 1 | 5 | 2.100000  | 8.718752986   | -5.981669204 | -11.995277170 | 0 | 1 | 1 | # | st |
| 3677 | 1 | 5 | 2.100000  | 9.399722226   | -1.518820782 | -6.670701903  | 0 | 1 | 1 | # | st |
| 3678 | 1 | 5 | 2.100000  | 6.811372226   | -5.973370782 | -6.670701903  | 0 | 1 | 1 | # | st |
| 3679 | 1 | 5 | 2.100000  | 6.811347014   | -2.927430796 | -6.669722830  | 0 | 1 | 1 | # | st |
| 3680 | 1 | 5 | 2.100000  | 6.130377774   | -7.390279218 | -11.994298097 | 0 | 1 | 1 | # | st |
| 3681 | 1 | 1 | 1.575000  | 12.941955029  | -7.434438432 | -9.332229368  | 0 | 1 | 1 | # | ao |
| 3682 | 1 | 1 | 1.575000  | 10.353605029  | -2.979888432 | -9.332229368  | 0 | 1 | 1 | # | ao |
| 3683 | 1 | 1 | 1.575000  | 12.941544971  | -1.474661568 | -9.332770632  | 0 | 1 | 1 | # | ao |
| 3684 | 1 | 1 | 1.575000  | 15.529894971  | -5.929211568 | -9.332770632  | 0 | 1 | 1 | # | ao |
| 3685 | 1 | 2 | 0.425000  | 14.088050872  | -4.451832678 | -7.846384937  | 0 | 1 | 1 | # | ho |
| 3686 | 1 | 2 | 0.425000  | 11.499700872  | -8.906382678 | -7.846384937  | 0 | 1 | 1 | # | ho |
| 3687 | 1 | 2 | 0.425000  | 11.795449128  | -4.457267322 | -10.818615063 | 0 | 1 | 1 | # | ho |
| 3688 | 1 | 2 | 0.425000  | 14.383799128  | -0.002717322 | -10.818615063 | 0 | 1 | 1 | # | ho |
| 3689 | 1 | 3 | -1.050000 | 11.334714655  | -7.231598519 | -10.365922068 | 0 | 1 | 1 | # | ob |
| 3690 | 1 | 3 | -1.050000 | 15.376917264  | -2.604003874 | -12.564346262 | 0 | 1 | 1 | # | ob |
| 3691 | 1 | 3 | -1.050000 | 13.923644487  | -6.135450680 | -10.366131378 | 0 | 1 | 1 | # | ob |
| 3692 | 1 | 3 | -1.050000 | 12.788239092  | -1.860389700 | -12.565579711 | 0 | 1 | 1 | # | ob |
| 3693 | 1 | 3 | -1.050000 | 11.335294487  | -1.680900680 | -10.366131378 | 0 | 1 | 1 | # | ob |
| 3694 | 1 | 3 | -1.050000 | 11.959855513  | -2.773649320 | -8.298868622  | 0 | 1 | 1 | # | ob |
| 3695 | 1 | 3 | -1.050000 | 15.376589092  | -6.314939700 | -12.565579711 | 0 | 1 | 1 | # | ob |
| 3696 | 1 | 3 | -1.050000 | 11.960435345  | -6.132051481 | -8.299077932  | 0 | 1 | 1 | # | ob |
| 3697 | 1 | 3 | -1.050000 | 13.094932736  | -1.850546126 | -6.100653738  | 0 | 1 | 1 | # | ob |
| 3698 | 1 | 3 | -1.050000 | 14.548785345  | -1.677501481 | -8.299077932  | 0 | 1 | 1 | # | ob |
| 3699 | 1 | 3 | -1.050000 | 10.506582736  | -6.305096126 | -6.100653738  | 0 | 1 | 1 | # | ob |
| 3700 | 1 | 3 | -1.050000 | 13.095260908  | -7.048710300 | -6.099420289  | 0 | 1 | 1 | # | ob |
| 3701 | 1 | 4 | -0.950000 | 12.352657657  | -8.908159004 | -8.319917115  | 0 | 1 | 1 | # | oh |
| 3702 | 1 | 3 | -1.050000 | 15.020481651  | -8.905123030 | -6.271017583  | 0 | 1 | 1 | # | ob |
| 3703 | 1 | 4 | -0.950000 | 14.941007657  | -4.453609004 | -8.319917115  | 0 | 1 | 1 | # | oh |
| 3704 | 1 | 3 | -1.050000 | 12.432131651  | -4.450573030 | -6.271017583  | 0 | 1 | 1 | # | ob |
| 3705 | 1 | 4 | -0.950000 | 13.530842343  | -0.000940996 | -10.345082885 | 0 | 1 | 1 | # | oh |
| 3706 | 1 | 3 | -1.050000 | 10.863018349  | -0.003976970 | -12.393982417 | 0 | 1 | 1 | # | ob |
| 3707 | 1 | 4 | -0.950000 | 10.942492343  | -4.455490996 | -10.345082885 | 0 | 1 | 1 | # | oh |
| 3708 | 1 | 3 | -1.050000 | 13.451368349  | -4.458526970 | -12.393982417 | 0 | 1 | 1 | # | ob |
| 3709 | 1 | 3 | -1.050000 | 14.548205513  | -7.228199320 | -8.298868622  | 0 | 1 | 1 | # | ob |
| 3710 | 1 | 3 | -1.050000 | 10.506910908  | -2.594160300 | -6.099420289  | 0 | 1 | 1 | # | ob |
| 3711 | 1 | 3 | -1.050000 | 13.923064655  | -2.777048519 | -10.365922068 | 0 | 1 | 1 | # | ob |
| 3712 | 1 | 3 | -1.050000 | 12.788567264  | -7.058553874 | -12.564346262 | 0 | 1 | 1 | # | ob |
| 3713 | 1 | 5 | 2.100000  | 14.576397014  | -7.381980796 | -6.669722830  | 0 | 1 | 1 | # | st |
| 3714 | 1 | 5 | 2.100000  | 13.895427774  | -2.935729218 | -11.994298097 | 0 | 1 | 1 | # | st |
| 3715 | 1 | 5 | 2.100000  | 11.307102986  | -1.527119204 | -11.995277170 | 0 | 1 | 1 | # | st |
| 3716 | 1 | 5 | 2.100000  | 13.895452986  | -5.981669204 | -11.995277170 | 0 | 1 | 1 | # | st |
| 3717 | 1 | 5 | 2.100000  | 14.576422226  | -1.518820782 | -6.670701903  | 0 | 1 | 1 | # | st |
| 3718 | 1 | 5 | 2.100000  | 11.988072226  | -5.973370782 | -6.670701903  | 0 | 1 | 1 | # | st |
| 3719 | 1 | 5 | 2.100000  | 11.988047014  | -2.927430796 | -6.669722830  | 0 | 1 | 1 | # | st |
| 3720 | 1 | 5 | 2.100000  | 11.307077774  | -7.390279218 | -11.994298097 | 0 | 1 | 1 | # | st |
| 3721 | 1 | 1 | 1.575000  | -12.941544971 | -7.434438432 | -9.332229368  | 1 | 1 | 1 | # | ao |
| 3722 | 1 | 1 | 1.575000  | -15.529894971 | -2.979888432 | -9.332229368  | 1 | 1 | 1 | # | ao |
| 3723 | 1 | 1 | 1.575000  | -12.941955029 | -1.474661568 | -9.332770632  | 1 | 1 | 1 | # | ao |
| 3724 | 1 | 1 | 1.575000  | -10.353605029 | -5.929211568 | -9.332770632  | 1 | 1 | 1 | # | ao |
| 3725 | 1 | 2 | 0.425000  | -11.795449128 | -4.451832678 | -7.846384937  | 1 | 1 | 1 | # | ho |
| 3726 | 1 | 2 | 0.425000  | -14.383799128 | -8.906382678 | -7.846384937  | 1 | 1 | 1 | # | ho |
| 3727 | 1 | 2 | 0.425000  | -14.088050872 | -4.457267322 | -10.818615063 | 1 | 1 | 1 | # | ho |
| 3728 | 1 | 2 | 0.425000  | -11.499700872 | -0.002717322 | -10.818615063 | 1 | 1 | 1 | # | ho |
| 3729 | 1 | 3 | -1.050000 | -14.548785345 | -7.231598519 | -10.365922068 | 1 | 1 | 1 | # | ob |
| 3730 | 1 | 3 | -1.050000 | -10.506582736 | -2.604003874 | -12.564346262 | 1 | 1 | 1 | # | ob |
| 3731 | 1 | 3 | -1.050000 | -11.959855513 | -6.135450680 | -10.366131378 | 1 | 1 | 1 | # | ob |
| 3732 | 1 | 3 | -1.050000 | -13.095260908 | -1.860389700 | -12.565579711 | 1 | 1 | 1 | # | ob |
| 3733 | 1 | 3 | -1.050000 | -14.548205513 | -1.680900680 | -10.366131378 | 1 | 1 | 1 | # | ob |
| 3734 | 1 | 3 | -1.050000 | -13.923644487 | -2.773649320 | -8.298868622  | 1 | 1 | 1 | # | ob |
| 3735 | 1 | 3 | -1.050000 | -10.506910908 | -6.314939700 | -12.565579711 | 1 | 1 | 1 | # | ob |
| 3736 | 1 | 3 | -1.050000 | -13.923064655 | -6.132051481 | -8.299077932  | 1 | 1 | 1 | # | ob |
| 3737 | 1 | 3 | -1.050000 | -12.788567264 | -1.850546126 | -6.100653738  | 1 | 1 | 1 | # | ob |
| 3738 | 1 | 3 | -1.050000 | -11.334714655 | -1.677501481 | -8.299077932  | 1 | 1 | 1 | # | ob |
| 3739 | 1 | 3 | -1.050000 | -15.376917264 | -6.305096126 | -6.100653738  | 1 | 1 | 1 | # | ob |
| 3740 | 1 | 3 | -1.050000 | -12.788239092 | -7.048710300 | -6.099420289  | 1 | 1 | 1 | # | ob |
| 3741 | 1 | 4 | -0.950000 | -13.530842343 | -8.908159004 | -8.319917115  | 1 | 1 | 1 | # | oh |
| 3742 | 1 | 3 | -1.050000 | -10.863018349 | -8.905123030 | -6.271017583  | 1 | 1 | 1 | # | ob |
| 3743 | 1 | 4 | -0.950000 | -10.942492343 | -4.453609004 | -8.319917115  | 1 | 1 | 1 | # | oh |
| 3744 | 1 | 3 | -1.050000 | -13.451368349 | -4.450573030 | -6.271017583  | 1 | 1 | 1 | # | ob |
| 3745 | 1 | 4 | -0.950000 | -12.352657657 | -0.000940996 | -10.345082885 | 1 | 1 | 1 | # | oh |
| 3746 | 1 | 3 | -1.050000 | -15.020481651 | -0.003976970 | -12.393982417 | 1 | 1 | 1 | # | ob |
| 3747 | 1 | 4 | -0.950000 | -14.941007657 | -4.455490996 | -10.345082885 | 1 | 1 | 1 | # | oh |
| 3748 | 1 | 3 | -1.050000 | -12.432131651 | -4.458526970 | -12.393982417 | 1 | 1 | 1 | # | ob |
| 3749 | 1 | 3 | -1.050000 | -11.335294487 | -7.228199320 | -8.298868622  | 1 | 1 | 1 | # | ob |
| 3750 | 1 | 3 | -1.050000 | -15.376589092 | -2.594160300 | -6.099420289  | 1 | 1 | 1 | # | ob |
| 3751 | 1 | 3 | -1.050000 | -11.960435345 | -2.777048519 | -10.365922068 | 1 | 1 | 1 | # | ob |
| 3752 | 1 | 3 | -1.050000 | -13.094932736 | -7.058553874 | -12.564346262 | 1 | 1 | 1 | # | ob |
| 3753 | 1 | 5 | 2.100000  | -11.307102986 | -7.381980796 | -6.669722830  | 1 | 1 | 1 | # | st |
| 3754 | 1 | 5 | 2.100000  | -11.988072226 | -2.935729218 | -11.994298097 | 1 | 1 | 1 | # | st |
| 3755 | 1 | 5 | 2.100000  | -14.576397014 | -1.527119204 | -11.995277170 | 1 | 1 | 1 | # | st |
| 3756 | 1 | 5 | 2.100000  | -11.988047014 | -5.981669204 | -11.995277170 | 1 | 1 | 1 | # | st |
| 3757 | 1 | 5 | 2.100000  | -11.307077774 | -1.518820782 | -6.670701903  | 1 | 1 | 1 | # | st |
| 3758 | 1 | 5 | 2.100000  | -13.895427774 | -5.973370782 | -6.670701903  | 1 | 1 | 1 | # | st |
| 3759 | 1 | 5 | 2.100000  | -13.895452986 | -2.927430796 | -6.669722830  | 1 | 1 | 1 | # | st |
| 3760 | 1 | 5 | 2.100000  | -14.576422226 | -7.390279218 | -11.994298097 | 1 | 1 | 1 | # | st |

|      |   |   |           |               |              |               |   |   |   |    |
|------|---|---|-----------|---------------|--------------|---------------|---|---|---|----|
| 3761 | 1 | 1 | 1.575000  | -7.764844971  | -7.434438432 | -9.332229368  | 1 | 1 | 1 | ao |
| 3762 | 1 | 1 | 1.575000  | -10.353194971 | -2.979888432 | -9.332229368  | 1 | 1 | 1 | ao |
| 3763 | 1 | 1 | 1.575000  | -7.765255029  | -1.474661568 | -9.332770632  | 1 | 1 | 1 | ao |
| 3764 | 1 | 1 | 1.575000  | -5.176905029  | -5.929211568 | -9.332770632  | 1 | 1 | 1 | ao |
| 3765 | 1 | 2 | 0.425000  | -6.618749128  | -4.451832678 | -7.846384937  | 1 | 1 | 1 | ho |
| 3766 | 1 | 2 | 0.425000  | -9.207099128  | -8.906382678 | -7.846384937  | 1 | 1 | 1 | ho |
| 3767 | 1 | 2 | 0.425000  | -8.911350872  | -4.457267322 | -10.818615063 | 1 | 1 | 1 | ho |
| 3768 | 1 | 2 | 0.425000  | -6.323000872  | -0.002717322 | -10.818615063 | 1 | 1 | 1 | ho |
| 3769 | 1 | 3 | -1.050000 | -9.372085345  | -7.231598519 | -10.365922068 | 1 | 1 | 1 | ob |
| 3770 | 1 | 3 | -1.050000 | -5.329882736  | -2.604003874 | -12.564346262 | 1 | 1 | 1 | ob |
| 3771 | 1 | 3 | -1.050000 | -6.783155513  | -6.135450680 | -10.366131378 | 1 | 1 | 1 | ob |
| 3772 | 1 | 3 | -1.050000 | -7.918560908  | -1.860389700 | -12.565579711 | 1 | 1 | 1 | ob |
| 3773 | 1 | 3 | -1.050000 | -9.371505513  | -1.680900680 | -10.366131378 | 1 | 1 | 1 | ob |
| 3774 | 1 | 3 | -1.050000 | -8.746944487  | -2.773649320 | -8.298868622  | 1 | 1 | 1 | ob |
| 3775 | 1 | 3 | -1.050000 | -5.330210908  | -6.314939700 | -12.565579711 | 1 | 1 | 1 | ob |
| 3776 | 1 | 3 | -1.050000 | -8.746364655  | -6.132051481 | -8.299077932  | 1 | 1 | 1 | ob |
| 3777 | 1 | 3 | -1.050000 | -7.611867264  | -1.850546126 | -6.100653738  | 1 | 1 | 1 | ob |
| 3778 | 1 | 3 | -1.050000 | -6.158014655  | -1.677501481 | -8.299077932  | 1 | 1 | 1 | ob |
| 3779 | 1 | 3 | -1.050000 | -10.200217264 | -6.305096126 | -6.100653738  | 1 | 1 | 1 | ob |
| 3780 | 1 | 3 | -1.050000 | -7.611539092  | -7.048710300 | -6.099420289  | 1 | 1 | 1 | ob |
| 3781 | 1 | 4 | -0.950000 | -8.354142343  | -8.908159004 | -8.319917115  | 1 | 1 | 1 | oh |
| 3782 | 1 | 3 | -1.050000 | -5.686318349  | -8.905123030 | -6.271017583  | 1 | 1 | 1 | ob |
| 3783 | 1 | 4 | -0.950000 | -5.765792343  | -4.453609004 | -8.319917115  | 1 | 1 | 1 | oh |
| 3784 | 1 | 3 | -1.050000 | -8.274668349  | -4.450573030 | -6.271017583  | 1 | 1 | 1 | ob |
| 3785 | 1 | 4 | -0.950000 | -7.175957657  | -0.000940996 | -10.345082885 | 1 | 1 | 1 | oh |
| 3786 | 1 | 3 | -1.050000 | -9.843781651  | -0.003976970 | -12.393982417 | 1 | 1 | 1 | ob |
| 3787 | 1 | 4 | -0.950000 | -9.764307657  | -4.455490996 | -10.345082885 | 1 | 1 | 1 | oh |
| 3788 | 1 | 3 | -1.050000 | -7.255431651  | -4.458526970 | -12.393982417 | 1 | 1 | 1 | ob |
| 3789 | 1 | 3 | -1.050000 | -6.158594487  | -7.228199320 | -8.298868622  | 1 | 1 | 1 | ob |
| 3790 | 1 | 3 | -1.050000 | -10.199889092 | -2.594160300 | -6.099420289  | 1 | 1 | 1 | ob |
| 3791 | 1 | 3 | -1.050000 | -6.783735345  | -2.777048519 | -10.365922068 | 1 | 1 | 1 | ob |
| 3792 | 1 | 3 | -1.050000 | -7.918232736  | -7.058553874 | -12.564346262 | 1 | 1 | 1 | ob |
| 3793 | 1 | 5 | 2.100000  | -6.130402986  | -7.381980796 | -6.669722830  | 1 | 1 | 1 | st |
| 3794 | 1 | 5 | 2.100000  | -6.811372226  | -2.935729218 | -11.994298097 | 1 | 1 | 1 | st |
| 3795 | 1 | 5 | 2.100000  | -9.399697014  | -1.527119204 | -11.995277170 | 1 | 1 | 1 | st |
| 3796 | 1 | 5 | 2.100000  | -6.811347014  | -5.981669204 | -11.995277170 | 1 | 1 | 1 | st |
| 3797 | 1 | 5 | 2.100000  | -6.130377774  | -1.518820782 | -6.670701903  | 1 | 1 | 1 | st |
| 3798 | 1 | 5 | 2.100000  | -8.718727774  | -5.973370782 | -6.670701903  | 1 | 1 | 1 | st |
| 3799 | 1 | 5 | 2.100000  | -8.718752986  | -2.927430796 | -6.669722830  | 1 | 1 | 1 | st |
| 3800 | 1 | 5 | 2.100000  | -9.399722226  | -7.390279218 | -11.994298097 | 1 | 1 | 1 | st |
| 3801 | 1 | 1 | 1.575000  | -2.588144971  | -7.434438432 | -9.332229368  | 1 | 1 | 1 | ao |
| 3802 | 1 | 1 | 1.575000  | -5.176494971  | -2.979888432 | -9.332229368  | 1 | 1 | 1 | ao |
| 3803 | 1 | 1 | 1.575000  | -2.588555029  | -1.474661568 | -9.332770632  | 1 | 1 | 1 | ao |
| 3804 | 1 | 1 | 1.575000  | -0.000205029  | -5.929211568 | -9.332770632  | 1 | 1 | 1 | ao |
| 3805 | 1 | 2 | 0.425000  | -1.442049128  | -4.451832678 | -7.846384937  | 1 | 1 | 1 | ho |
| 3806 | 1 | 2 | 0.425000  | -4.030399128  | -8.906382678 | -7.846384937  | 1 | 1 | 1 | ho |
| 3807 | 1 | 2 | 0.425000  | -3.734650872  | -4.457267322 | -10.818615063 | 1 | 1 | 1 | ho |
| 3808 | 1 | 2 | 0.425000  | -1.146300872  | -0.002717322 | -10.818615063 | 1 | 1 | 1 | ho |
| 3809 | 1 | 3 | -1.050000 | -4.195385345  | -7.231598519 | -10.365922068 | 1 | 1 | 1 | ob |
| 3810 | 1 | 3 | -1.050000 | -0.153182736  | -2.604003874 | -12.564346262 | 1 | 1 | 1 | ob |
| 3811 | 1 | 3 | -1.050000 | -1.606455513  | -6.135450680 | -10.366131378 | 1 | 1 | 1 | ob |
| 3812 | 1 | 3 | -1.050000 | -2.741860908  | -1.860389700 | -12.565579711 | 1 | 1 | 1 | ob |
| 3813 | 1 | 3 | -1.050000 | -4.194805513  | -1.680900680 | -10.366131378 | 1 | 1 | 1 | ob |
| 3814 | 1 | 3 | -1.050000 | -3.570244487  | -2.773649320 | -8.298868622  | 1 | 1 | 1 | ob |
| 3815 | 1 | 3 | -1.050000 | -0.153510908  | -6.314939700 | -12.565579711 | 1 | 1 | 1 | ob |
| 3816 | 1 | 3 | -1.050000 | -3.569664655  | -6.132051481 | -8.299077932  | 1 | 1 | 1 | ob |
| 3817 | 1 | 3 | -1.050000 | -2.435167264  | -1.850546126 | -6.100653738  | 1 | 1 | 1 | ob |
| 3818 | 1 | 3 | -1.050000 | -0.981314655  | -1.677501481 | -8.299077932  | 1 | 1 | 1 | ob |
| 3819 | 1 | 3 | -1.050000 | -5.023517264  | -6.305096126 | -6.100653738  | 1 | 1 | 1 | ob |
| 3820 | 1 | 3 | -1.050000 | -2.434839092  | -7.048710300 | -6.099420289  | 1 | 1 | 1 | ob |
| 3821 | 1 | 4 | -0.950000 | -3.177442343  | -8.908159004 | -8.319917115  | 1 | 1 | 1 | oh |
| 3822 | 1 | 3 | -1.050000 | -0.509618349  | -8.905123030 | -6.271017583  | 1 | 1 | 1 | ob |
| 3823 | 1 | 4 | -0.950000 | -0.589092343  | -4.453609004 | -8.319917115  | 1 | 1 | 1 | oh |
| 3824 | 1 | 3 | -1.050000 | -3.097968349  | -4.450573030 | -6.271017583  | 1 | 1 | 1 | ob |
| 3825 | 1 | 4 | -0.950000 | -1.999257657  | -0.000940996 | -10.345082885 | 1 | 1 | 1 | oh |
| 3826 | 1 | 3 | -1.050000 | -4.667081651  | -0.003976970 | -12.393982417 | 1 | 1 | 1 | ob |
| 3827 | 1 | 4 | -0.950000 | -4.587607657  | -4.455490996 | -10.345082885 | 1 | 1 | 1 | oh |
| 3828 | 1 | 3 | -1.050000 | -2.078731651  | -4.458526970 | -12.393982417 | 1 | 1 | 1 | ob |
| 3829 | 1 | 3 | -1.050000 | -0.981894487  | -7.228199320 | -8.298868622  | 1 | 1 | 1 | ob |
| 3830 | 1 | 3 | -1.050000 | -5.023189092  | -2.594160300 | -6.099420289  | 1 | 1 | 1 | ob |
| 3831 | 1 | 3 | -1.050000 | -1.607035345  | -2.777048519 | -10.365922068 | 1 | 1 | 1 | ob |
| 3832 | 1 | 3 | -1.050000 | -2.741532736  | -7.058553874 | -12.564346262 | 1 | 1 | 1 | ob |
| 3833 | 1 | 5 | 2.100000  | -0.953702986  | -7.381980796 | -6.669722830  | 1 | 1 | 1 | st |
| 3834 | 1 | 5 | 2.100000  | -1.634672226  | -2.935729218 | -11.994298097 | 1 | 1 | 1 | st |
| 3835 | 1 | 5 | 2.100000  | -4.222997014  | -1.527119204 | -11.995277170 | 1 | 1 | 1 | st |
| 3836 | 1 | 5 | 2.100000  | -1.634647014  | -5.981669204 | -11.995277170 | 1 | 1 | 1 | st |
| 3837 | 1 | 5 | 2.100000  | -0.953677774  | -1.518820782 | -6.670701903  | 1 | 1 | 1 | st |
| 3838 | 1 | 5 | 2.100000  | -3.542027774  | -5.973370782 | -6.670701903  | 1 | 1 | 1 | st |
| 3839 | 1 | 5 | 2.100000  | -3.542052986  | -2.927430796 | -6.669722830  | 1 | 1 | 1 | st |
| 3840 | 1 | 5 | 2.100000  | -4.223022226  | -7.390279218 | -11.994298097 | 1 | 1 | 1 | st |

Bonds

|    |   |    |     |
|----|---|----|-----|
| 1  | 1 | 5  | 23  |
| 2  | 1 | 6  | 21  |
| 3  | 1 | 7  | 27  |
| 4  | 1 | 8  | 25  |
| 5  | 1 | 45 | 63  |
| 6  | 1 | 46 | 61  |
| 7  | 1 | 47 | 67  |
| 8  | 1 | 48 | 65  |
| 9  | 1 | 85 | 103 |
| 10 | 1 | 86 | 101 |

11 1 87 107  
12 1 88 105  
13 1 125 143  
14 1 126 141  
15 1 127 147  
16 1 128 145  
17 1 165 183  
18 1 166 181  
19 1 167 187  
20 1 168 185  
21 1 205 223  
22 1 206 221  
23 1 207 227  
24 1 208 225  
25 1 245 263  
26 1 246 261  
27 1 247 267  
28 1 248 265  
29 1 285 303  
30 1 286 301  
31 1 287 307  
32 1 288 305  
33 1 325 343  
34 1 326 341  
35 1 327 347  
36 1 328 345  
37 1 365 383  
38 1 366 381  
39 1 367 387  
40 1 368 385  
41 1 405 423  
42 1 406 421  
43 1 407 427  
44 1 408 425  
45 1 445 463  
46 1 446 461  
47 1 447 467  
48 1 448 465  
49 1 485 503  
50 1 486 501  
51 1 487 507  
52 1 488 505  
53 1 525 543  
54 1 526 541  
55 1 527 547  
56 1 528 545  
57 1 565 583  
58 1 566 581  
59 1 567 587  
60 1 568 585  
61 1 605 623  
62 1 606 621  
63 1 607 627  
64 1 608 625  
65 1 645 663  
66 1 646 661  
67 1 647 667  
68 1 648 665  
69 1 685 703  
70 1 686 701  
71 1 687 707  
72 1 688 705  
73 1 725 743  
74 1 726 741  
75 1 727 747  
76 1 728 745  
77 1 765 783  
78 1 766 781  
79 1 767 787  
80 1 768 785  
81 1 805 823  
82 1 806 821  
83 1 807 827  
84 1 808 825  
85 1 845 863  
86 1 846 861  
87 1 847 867  
88 1 848 865  
89 1 885 903  
90 1 886 901  
91 1 887 907  
92 1 888 905  
93 1 925 943  
94 1 926 941  
95 1 927 947  
96 1 928 945  
97 1 965 983  
98 1 966 981  
99 1 967 987  
100 1 968 985  
101 1 1005 1023  
102 1 1006 1021  
103 1 1007 1027

104 1 1008 1025  
105 1 1045 1063  
106 1 1046 1061  
107 1 1047 1067  
108 1 1048 1065  
109 1 1085 1103  
110 1 1086 1101  
111 1 1087 1107  
112 1 1088 1105  
113 1 1125 1143  
114 1 1126 1141  
115 1 1127 1147  
116 1 1128 1145  
117 1 1165 1183  
118 1 1166 1181  
119 1 1167 1187  
120 1 1168 1185  
121 1 1205 1223  
122 1 1206 1221  
123 1 1207 1227  
124 1 1208 1225  
125 1 1245 1263  
126 1 1246 1261  
127 1 1247 1267  
128 1 1248 1265  
129 1 1285 1303  
130 1 1286 1301  
131 1 1287 1307  
132 1 1288 1305  
133 1 1325 1343  
134 1 1326 1341  
135 1 1327 1347  
136 1 1328 1345  
137 1 1365 1383  
138 1 1366 1381  
139 1 1367 1387  
140 1 1368 1385  
141 1 1405 1423  
142 1 1406 1421  
143 1 1407 1427  
144 1 1408 1425  
145 1 1445 1463  
146 1 1446 1461  
147 1 1447 1467  
148 1 1448 1465  
149 1 1485 1503  
150 1 1486 1501  
151 1 1487 1507  
152 1 1488 1505  
153 1 1525 1543  
154 1 1526 1541  
155 1 1527 1547  
156 1 1528 1545  
157 1 1565 1583  
158 1 1566 1581  
159 1 1567 1587  
160 1 1568 1585  
161 1 1605 1623  
162 1 1606 1621  
163 1 1607 1627  
164 1 1608 1625  
165 1 1645 1663  
166 1 1646 1661  
167 1 1647 1667  
168 1 1648 1665  
169 1 1685 1703  
170 1 1686 1701  
171 1 1687 1707  
172 1 1688 1705  
173 1 1725 1743  
174 1 1726 1741  
175 1 1727 1747  
176 1 1728 1745  
177 1 1765 1783  
178 1 1766 1781  
179 1 1767 1787  
180 1 1768 1785  
181 1 1805 1823  
182 1 1806 1821  
183 1 1807 1827  
184 1 1808 1825  
185 1 1845 1863  
186 1 1846 1861  
187 1 1847 1867  
188 1 1848 1865  
189 1 1885 1903  
190 1 1886 1901  
191 1 1887 1907  
192 1 1888 1905  
193 1 1925 1943  
194 1 1926 1941  
195 1 1927 1947  
196 1 1928 1945

197 1 1965 1983  
198 1 1966 1981  
199 1 1967 1987  
200 1 1968 1985  
201 1 2005 2023  
202 1 2006 2021  
203 1 2007 2027  
204 1 2008 2025  
205 1 2045 2063  
206 1 2046 2061  
207 1 2047 2067  
208 1 2048 2065  
209 1 2085 2103  
210 1 2086 2101  
211 1 2087 2107  
212 1 2088 2105  
213 1 2125 2143  
214 1 2126 2141  
215 1 2127 2147  
216 1 2128 2145  
217 1 2165 2183  
218 1 2166 2181  
219 1 2167 2187  
220 1 2168 2185  
221 1 2205 2223  
222 1 2206 2221  
223 1 2207 2227  
224 1 2208 2225  
225 1 2245 2263  
226 1 2246 2261  
227 1 2247 2267  
228 1 2248 2265  
229 1 2285 2303  
230 1 2286 2301  
231 1 2287 2307  
232 1 2288 2305  
233 1 2325 2343  
234 1 2326 2341  
235 1 2327 2347  
236 1 2328 2345  
237 1 2365 2383  
238 1 2366 2381  
239 1 2367 2387  
240 1 2368 2385  
241 1 2405 2423  
242 1 2406 2421  
243 1 2407 2427  
244 1 2408 2425  
245 1 2445 2463  
246 1 2446 2461  
247 1 2447 2467  
248 1 2448 2465  
249 1 2485 2503  
250 1 2486 2501  
251 1 2487 2507  
252 1 2488 2505  
253 1 2525 2543  
254 1 2526 2541  
255 1 2527 2547  
256 1 2528 2545  
257 1 2565 2583  
258 1 2566 2581  
259 1 2567 2587  
260 1 2568 2585  
261 1 2605 2623  
262 1 2606 2621  
263 1 2607 2627  
264 1 2608 2625  
265 1 2645 2663  
266 1 2646 2661  
267 1 2647 2667  
268 1 2648 2665  
269 1 2685 2703  
270 1 2686 2701  
271 1 2687 2707  
272 1 2688 2705  
273 1 2725 2743  
274 1 2726 2741  
275 1 2727 2747  
276 1 2728 2745  
277 1 2765 2783  
278 1 2766 2781  
279 1 2767 2787  
280 1 2768 2785  
281 1 2805 2823  
282 1 2806 2821  
283 1 2807 2827  
284 1 2808 2825  
285 1 2845 2863  
286 1 2846 2861  
287 1 2847 2867  
288 1 2848 2865  
289 1 2885 2903

290 1 2886 2901  
291 1 2887 2907  
292 1 2888 2905  
293 1 2925 2943  
294 1 2926 2941  
295 1 2927 2947  
296 1 2928 2945  
297 1 2965 2983  
298 1 2966 2981  
299 1 2967 2987  
300 1 2968 2985  
301 1 3005 3023  
302 1 3006 3021  
303 1 3007 3027  
304 1 3008 3025  
305 1 3045 3063  
306 1 3046 3061  
307 1 3047 3067  
308 1 3048 3065  
309 1 3085 3103  
310 1 3086 3101  
311 1 3087 3107  
312 1 3088 3105  
313 1 3125 3143  
314 1 3126 3141  
315 1 3127 3147  
316 1 3128 3145  
317 1 3165 3183  
318 1 3166 3181  
319 1 3167 3187  
320 1 3168 3185  
321 1 3205 3223  
322 1 3206 3221  
323 1 3207 3227  
324 1 3208 3225  
325 1 3245 3263  
326 1 3246 3261  
327 1 3247 3267  
328 1 3248 3265  
329 1 3285 3303  
330 1 3286 3301  
331 1 3287 3307  
332 1 3288 3305  
333 1 3325 3343  
334 1 3326 3341  
335 1 3327 3347  
336 1 3328 3345  
337 1 3365 3383  
338 1 3366 3381  
339 1 3367 3387  
340 1 3368 3385  
341 1 3405 3423  
342 1 3406 3421  
343 1 3407 3427  
344 1 3408 3425  
345 1 3445 3463  
346 1 3446 3461  
347 1 3447 3467  
348 1 3448 3465  
349 1 3485 3503  
350 1 3486 3501  
351 1 3487 3507  
352 1 3488 3505  
353 1 3525 3543  
354 1 3526 3541  
355 1 3527 3547  
356 1 3528 3545  
357 1 3565 3583  
358 1 3566 3581  
359 1 3567 3587  
360 1 3568 3585  
361 1 3605 3623  
362 1 3606 3621  
363 1 3607 3627  
364 1 3608 3625  
365 1 3645 3663  
366 1 3646 3661  
367 1 3647 3667  
368 1 3648 3665  
369 1 3685 3703  
370 1 3686 3701  
371 1 3687 3707  
372 1 3688 3705  
373 1 3725 3743  
374 1 3726 3741  
375 1 3727 3747  
376 1 3728 3745  
377 1 3765 3783  
378 1 3766 3781  
379 1 3767 3787  
380 1 3768 3785  
381 1 3805 3823  
382 1 3806 3821

383 1 3807 3827  
384 1 3808 3825

Angles

1 1 1 21 6  
2 1 723 21 6  
3 1 42 23 5  
4 1 4 23 5  
5 1 241 25 8  
6 1 3 25 8  
7 1 204 27 7  
8 1 2 27 7  
9 1 41 61 46  
10 1 763 61 46  
11 1 82 63 45  
12 1 44 63 45  
13 1 281 65 48  
14 1 43 65 48  
15 1 4 67 47  
16 1 42 67 47  
17 1 81 101 86  
18 1 803 101 86  
19 1 122 103 85  
20 1 84 103 85  
21 1 321 105 88  
22 1 83 105 88  
23 1 44 107 87  
24 1 82 107 87  
25 1 121 141 126  
26 1 843 141 126  
27 1 162 143 125  
28 1 124 143 125  
29 1 361 145 128  
30 1 123 145 128  
31 1 84 147 127  
32 1 122 147 127  
33 1 161 181 166  
34 1 883 181 166  
35 1 202 183 165  
36 1 164 183 165  
37 1 401 185 168  
38 1 163 185 168  
39 1 124 187 167  
40 1 162 187 167  
41 1 201 221 206  
42 1 923 221 206  
43 1 2 223 205  
44 1 204 223 205  
45 1 441 225 208  
46 1 203 225 208  
47 1 164 227 207  
48 1 202 227 207  
49 1 241 261 246  
50 1 3 261 246  
51 1 282 263 245  
52 1 244 263 245  
53 1 481 265 248  
54 1 243 265 248  
55 1 444 267 247  
56 1 242 267 247  
57 1 281 301 286  
58 1 43 301 286  
59 1 322 303 285  
60 1 284 303 285  
61 1 521 305 288  
62 1 283 305 288  
63 1 244 307 287  
64 1 282 307 287  
65 1 321 341 326  
66 1 83 341 326  
67 1 362 343 325  
68 1 324 343 325  
69 1 561 345 328  
70 1 323 345 328  
71 1 284 347 327  
72 1 322 347 327  
73 1 361 381 366  
74 1 123 381 366  
75 1 402 383 365  
76 1 364 383 365  
77 1 601 385 368  
78 1 363 385 368  
79 1 324 387 367  
80 1 362 387 367  
81 1 401 421 406  
82 1 163 421 406  
83 1 442 423 405  
84 1 404 423 405  
85 1 641 425 408  
86 1 403 425 408  
87 1 364 427 407  
88 1 402 427 407

|     |   |     |     |     |
|-----|---|-----|-----|-----|
| 89  | 1 | 441 | 461 | 446 |
| 90  | 1 | 203 | 461 | 446 |
| 91  | 1 | 242 | 463 | 445 |
| 92  | 1 | 444 | 463 | 445 |
| 93  | 1 | 681 | 465 | 448 |
| 94  | 1 | 443 | 465 | 448 |
| 95  | 1 | 404 | 467 | 447 |
| 96  | 1 | 442 | 467 | 447 |
| 97  | 1 | 481 | 501 | 486 |
| 98  | 1 | 243 | 501 | 486 |
| 99  | 1 | 522 | 503 | 485 |
| 100 | 1 | 484 | 503 | 485 |
| 101 | 1 | 721 | 505 | 488 |
| 102 | 1 | 483 | 505 | 488 |
| 103 | 1 | 684 | 507 | 487 |
| 104 | 1 | 482 | 507 | 487 |
| 105 | 1 | 521 | 541 | 526 |
| 106 | 1 | 283 | 541 | 526 |
| 107 | 1 | 562 | 543 | 525 |
| 108 | 1 | 524 | 543 | 525 |
| 109 | 1 | 761 | 545 | 528 |
| 110 | 1 | 523 | 545 | 528 |
| 111 | 1 | 484 | 547 | 527 |
| 112 | 1 | 522 | 547 | 527 |
| 113 | 1 | 561 | 581 | 566 |
| 114 | 1 | 323 | 581 | 566 |
| 115 | 1 | 602 | 583 | 565 |
| 116 | 1 | 564 | 583 | 565 |
| 117 | 1 | 801 | 585 | 568 |
| 118 | 1 | 563 | 585 | 568 |
| 119 | 1 | 524 | 587 | 567 |
| 120 | 1 | 562 | 587 | 567 |
| 121 | 1 | 601 | 621 | 606 |
| 122 | 1 | 363 | 621 | 606 |
| 123 | 1 | 642 | 623 | 605 |
| 124 | 1 | 604 | 623 | 605 |
| 125 | 1 | 841 | 625 | 608 |
| 126 | 1 | 603 | 625 | 608 |
| 127 | 1 | 564 | 627 | 607 |
| 128 | 1 | 602 | 627 | 607 |
| 129 | 1 | 641 | 661 | 646 |
| 130 | 1 | 403 | 661 | 646 |
| 131 | 1 | 682 | 663 | 645 |
| 132 | 1 | 644 | 663 | 645 |
| 133 | 1 | 881 | 665 | 648 |
| 134 | 1 | 643 | 665 | 648 |
| 135 | 1 | 604 | 667 | 647 |
| 136 | 1 | 642 | 667 | 647 |
| 137 | 1 | 681 | 701 | 686 |
| 138 | 1 | 443 | 701 | 686 |
| 139 | 1 | 482 | 703 | 685 |
| 140 | 1 | 684 | 703 | 685 |
| 141 | 1 | 921 | 705 | 688 |
| 142 | 1 | 683 | 705 | 688 |
| 143 | 1 | 644 | 707 | 687 |
| 144 | 1 | 682 | 707 | 687 |
| 145 | 1 | 721 | 741 | 726 |
| 146 | 1 | 483 | 741 | 726 |
| 147 | 1 | 762 | 743 | 725 |
| 148 | 1 | 724 | 743 | 725 |
| 149 | 1 | 1   | 745 | 728 |
| 150 | 1 | 723 | 745 | 728 |
| 151 | 1 | 924 | 747 | 727 |
| 152 | 1 | 722 | 747 | 727 |
| 153 | 1 | 761 | 781 | 766 |
| 154 | 1 | 523 | 781 | 766 |
| 155 | 1 | 802 | 783 | 765 |
| 156 | 1 | 764 | 783 | 765 |
| 157 | 1 | 41  | 785 | 768 |
| 158 | 1 | 763 | 785 | 768 |
| 159 | 1 | 724 | 787 | 767 |
| 160 | 1 | 762 | 787 | 767 |
| 161 | 1 | 801 | 821 | 806 |
| 162 | 1 | 563 | 821 | 806 |
| 163 | 1 | 842 | 823 | 805 |
| 164 | 1 | 804 | 823 | 805 |
| 165 | 1 | 81  | 825 | 808 |
| 166 | 1 | 803 | 825 | 808 |
| 167 | 1 | 764 | 827 | 807 |
| 168 | 1 | 802 | 827 | 807 |
| 169 | 1 | 841 | 861 | 846 |
| 170 | 1 | 603 | 861 | 846 |
| 171 | 1 | 882 | 863 | 845 |
| 172 | 1 | 844 | 863 | 845 |
| 173 | 1 | 121 | 865 | 848 |
| 174 | 1 | 843 | 865 | 848 |
| 175 | 1 | 804 | 867 | 847 |
| 176 | 1 | 842 | 867 | 847 |
| 177 | 1 | 881 | 901 | 886 |
| 178 | 1 | 643 | 901 | 886 |
| 179 | 1 | 922 | 903 | 885 |
| 180 | 1 | 884 | 903 | 885 |
| 181 | 1 | 161 | 905 | 888 |



182 1 883 905 888  
183 1 844 907 887  
184 1 882 907 887  
185 1 921 941 926  
186 1 683 941 926  
187 1 722 943 925  
188 1 924 943 925  
189 1 201 945 928  
190 1 923 945 928  
191 1 884 947 927  
192 1 922 947 927  
193 1 961 981 966  
194 1 1683 981 966  
195 1 1002 983 965  
196 1 964 983 965  
197 1 1201 985 968  
198 1 963 985 968  
199 1 1164 987 967  
200 1 962 987 967  
201 1 1001 1021 1006  
202 1 1723 1021 1006  
203 1 1042 1023 1005  
204 1 1004 1023 1005  
205 1 1241 1025 1008  
206 1 1003 1025 1008  
207 1 964 1027 1007  
208 1 1002 1027 1007  
209 1 1041 1061 1046  
210 1 1763 1061 1046  
211 1 1082 1063 1045  
212 1 1044 1063 1045  
213 1 1281 1065 1048  
214 1 1043 1065 1048  
215 1 1004 1067 1047  
216 1 1042 1067 1047  
217 1 1081 1101 1086  
218 1 1803 1101 1086  
219 1 1122 1103 1085  
220 1 1084 1103 1085  
221 1 1321 1105 1088  
222 1 1083 1105 1088  
223 1 1044 1107 1087  
224 1 1082 1107 1087  
225 1 1121 1141 1126  
226 1 1843 1141 1126  
227 1 1162 1143 1125  
228 1 1124 1143 1125  
229 1 1361 1145 1128  
230 1 1123 1145 1128  
231 1 1084 1147 1127  
232 1 1122 1147 1127  
233 1 1161 1181 1166  
234 1 1883 1181 1166  
235 1 962 1183 1165  
236 1 1164 1183 1165  
237 1 1401 1185 1168  
238 1 1163 1185 1168  
239 1 1124 1187 1167  
240 1 1162 1187 1167  
241 1 1201 1221 1206  
242 1 963 1221 1206  
243 1 1242 1223 1205  
244 1 1204 1223 1205  
245 1 1441 1225 1208  
246 1 1203 1225 1208  
247 1 1404 1227 1207  
248 1 1202 1227 1207  
249 1 1241 1261 1246  
250 1 1003 1261 1246  
251 1 1282 1263 1245  
252 1 1244 1263 1245  
253 1 1481 1265 1248  
254 1 1243 1265 1248  
255 1 1204 1267 1247  
256 1 1242 1267 1247  
257 1 1281 1301 1286  
258 1 1043 1301 1286  
259 1 1322 1303 1285  
260 1 1284 1303 1285  
261 1 1521 1305 1288  
262 1 1283 1305 1288  
263 1 1244 1307 1287  
264 1 1282 1307 1287  
265 1 1321 1341 1326  
266 1 1083 1341 1326  
267 1 1362 1343 1325  
268 1 1324 1343 1325  
269 1 1561 1345 1328  
270 1 1323 1345 1328  
271 1 1284 1347 1327  
272 1 1322 1347 1327  
273 1 1361 1381 1366  
274 1 1123 1381 1366

275 1 1402 1383 1365  
276 1 1364 1383 1365  
277 1 1601 1385 1368  
278 1 1363 1385 1368  
279 1 1324 1387 1367  
280 1 1362 1387 1367  
281 1 1401 1421 1406  
282 1 1163 1421 1406  
283 1 1202 1423 1405  
284 1 1404 1423 1405  
285 1 1641 1425 1408  
286 1 1403 1425 1408  
287 1 1364 1427 1407  
288 1 1402 1427 1407  
289 1 1441 1461 1446  
290 1 1203 1461 1446  
291 1 1482 1463 1445  
292 1 1444 1463 1445  
293 1 1681 1465 1448  
294 1 1443 1465 1448  
295 1 1644 1467 1447  
296 1 1442 1467 1447  
297 1 1481 1501 1486  
298 1 1243 1501 1486  
299 1 1522 1503 1485  
300 1 1484 1503 1485  
301 1 1721 1505 1488  
302 1 1483 1505 1488  
303 1 1444 1507 1487  
304 1 1482 1507 1487  
305 1 1521 1541 1526  
306 1 1283 1541 1526  
307 1 1562 1543 1525  
308 1 1524 1543 1525  
309 1 1761 1545 1528  
310 1 1523 1545 1528  
311 1 1484 1547 1527  
312 1 1522 1547 1527  
313 1 1561 1581 1566  
314 1 1323 1581 1566  
315 1 1602 1583 1565  
316 1 1564 1583 1565  
317 1 1801 1585 1568  
318 1 1563 1585 1568  
319 1 1524 1587 1567  
320 1 1562 1587 1567  
321 1 1601 1621 1606  
322 1 1363 1621 1606  
323 1 1642 1623 1605  
324 1 1604 1623 1605  
325 1 1841 1625 1608  
326 1 1603 1625 1608  
327 1 1564 1627 1607  
328 1 1602 1627 1607  
329 1 1641 1661 1646  
330 1 1403 1661 1646  
331 1 1442 1663 1645  
332 1 1644 1663 1645  
333 1 1881 1665 1648  
334 1 1643 1665 1648  
335 1 1604 1667 1647  
336 1 1642 1667 1647  
337 1 1681 1701 1686  
338 1 1443 1701 1686  
339 1 1722 1703 1685  
340 1 1684 1703 1685  
341 1 961 1705 1688  
342 1 1683 1705 1688  
343 1 1884 1707 1687  
344 1 1682 1707 1687  
345 1 1721 1741 1726  
346 1 1483 1741 1726  
347 1 1762 1743 1725  
348 1 1724 1743 1725  
349 1 1001 1745 1728  
350 1 1723 1745 1728  
351 1 1684 1747 1727  
352 1 1722 1747 1727  
353 1 1761 1781 1766  
354 1 1523 1781 1766  
355 1 1802 1783 1765  
356 1 1764 1783 1765  
357 1 1041 1785 1768  
358 1 1763 1785 1768  
359 1 1724 1787 1767  
360 1 1762 1787 1767  
361 1 1801 1821 1806  
362 1 1563 1821 1806  
363 1 1842 1823 1805  
364 1 1804 1823 1805  
365 1 1081 1825 1808  
366 1 1803 1825 1808  
367 1 1764 1827 1807

368 1 1802 1827 1807  
369 1 1841 1861 1846  
370 1 1603 1861 1846  
371 1 1882 1863 1845  
372 1 1844 1863 1845  
373 1 1121 1865 1848  
374 1 1843 1865 1848  
375 1 1804 1867 1847  
376 1 1842 1867 1847  
377 1 1881 1901 1886  
378 1 1643 1901 1886  
379 1 1682 1903 1885  
380 1 1884 1903 1885  
381 1 1161 1905 1888  
382 1 1883 1905 1888  
383 1 1844 1907 1887  
384 1 1882 1907 1887  
385 1 1921 1941 1926  
386 1 2643 1941 1926  
387 1 1962 1943 1925  
388 1 1924 1943 1925  
389 1 2161 1945 1928  
390 1 1923 1945 1928  
391 1 2124 1947 1927  
392 1 1922 1947 1927  
393 1 1961 1981 1966  
394 1 2683 1981 1966  
395 1 2002 1983 1965  
396 1 1964 1983 1965  
397 1 2201 1985 1968  
398 1 1963 1985 1968  
399 1 1924 1987 1967  
400 1 1962 1987 1967  
401 1 2001 2021 2006  
402 1 2723 2021 2006  
403 1 2042 2023 2005  
404 1 2004 2023 2005  
405 1 2241 2025 2008  
406 1 2003 2025 2008  
407 1 1964 2027 2007  
408 1 2002 2027 2007  
409 1 2041 2061 2046  
410 1 2763 2061 2046  
411 1 2082 2063 2045  
412 1 2044 2063 2045  
413 1 2281 2065 2048  
414 1 2043 2065 2048  
415 1 2004 2067 2047  
416 1 2042 2067 2047  
417 1 2081 2101 2086  
418 1 2803 2101 2086  
419 1 2122 2103 2085  
420 1 2084 2103 2085  
421 1 2321 2105 2088  
422 1 2083 2105 2088  
423 1 2044 2107 2087  
424 1 2082 2107 2087  
425 1 2121 2141 2126  
426 1 2843 2141 2126  
427 1 1922 2143 2125  
428 1 2124 2143 2125  
429 1 2361 2145 2128  
430 1 2123 2145 2128  
431 1 2084 2147 2127  
432 1 2122 2147 2127  
433 1 2161 2181 2166  
434 1 1923 2181 2166  
435 1 2202 2183 2165  
436 1 2164 2183 2165  
437 1 2401 2185 2168  
438 1 2163 2185 2168  
439 1 2364 2187 2167  
440 1 2162 2187 2167  
441 1 2201 2221 2206  
442 1 1963 2221 2206  
443 1 2242 2223 2205  
444 1 2204 2223 2205  
445 1 2441 2225 2208  
446 1 2203 2225 2208  
447 1 2164 2227 2207  
448 1 2202 2227 2207  
449 1 2241 2261 2246  
450 1 2003 2261 2246  
451 1 2282 2263 2245  
452 1 2244 2263 2245  
453 1 2481 2265 2248  
454 1 2243 2265 2248  
455 1 2204 2267 2247  
456 1 2242 2267 2247  
457 1 2281 2301 2286  
458 1 2043 2301 2286  
459 1 2322 2303 2285  
460 1 2284 2303 2285

|     |   |      |      |      |
|-----|---|------|------|------|
| 461 | 1 | 2521 | 2305 | 2288 |
| 462 | 1 | 2283 | 2305 | 2288 |
| 463 | 1 | 2244 | 2307 | 2287 |
| 464 | 1 | 2282 | 2307 | 2287 |
| 465 | 1 | 2321 | 2341 | 2326 |
| 466 | 1 | 2083 | 2341 | 2326 |
| 467 | 1 | 2362 | 2343 | 2325 |
| 468 | 1 | 2324 | 2343 | 2325 |
| 469 | 1 | 2561 | 2345 | 2328 |
| 470 | 1 | 2323 | 2345 | 2328 |
| 471 | 1 | 2284 | 2347 | 2327 |
| 472 | 1 | 2322 | 2347 | 2327 |
| 473 | 1 | 2361 | 2381 | 2366 |
| 474 | 1 | 2123 | 2381 | 2366 |
| 475 | 1 | 2162 | 2383 | 2365 |
| 476 | 1 | 2364 | 2383 | 2365 |
| 477 | 1 | 2601 | 2385 | 2368 |
| 478 | 1 | 2363 | 2385 | 2368 |
| 479 | 1 | 2324 | 2387 | 2367 |
| 480 | 1 | 2362 | 2387 | 2367 |
| 481 | 1 | 2401 | 2421 | 2406 |
| 482 | 1 | 2163 | 2421 | 2406 |
| 483 | 1 | 2442 | 2423 | 2405 |
| 484 | 1 | 2404 | 2423 | 2405 |
| 485 | 1 | 2641 | 2425 | 2408 |
| 486 | 1 | 2403 | 2425 | 2408 |
| 487 | 1 | 2604 | 2427 | 2407 |
| 488 | 1 | 2402 | 2427 | 2407 |
| 489 | 1 | 2441 | 2461 | 2446 |
| 490 | 1 | 2203 | 2461 | 2446 |
| 491 | 1 | 2482 | 2463 | 2445 |
| 492 | 1 | 2444 | 2463 | 2445 |
| 493 | 1 | 2681 | 2465 | 2448 |
| 494 | 1 | 2443 | 2465 | 2448 |
| 495 | 1 | 2404 | 2467 | 2447 |
| 496 | 1 | 2442 | 2467 | 2447 |
| 497 | 1 | 2481 | 2501 | 2486 |
| 498 | 1 | 2243 | 2501 | 2486 |
| 499 | 1 | 2522 | 2503 | 2485 |
| 500 | 1 | 2484 | 2503 | 2485 |
| 501 | 1 | 2721 | 2505 | 2488 |
| 502 | 1 | 2483 | 2505 | 2488 |
| 503 | 1 | 2444 | 2507 | 2487 |
| 504 | 1 | 2482 | 2507 | 2487 |
| 505 | 1 | 2521 | 2541 | 2526 |
| 506 | 1 | 2283 | 2541 | 2526 |
| 507 | 1 | 2562 | 2543 | 2525 |
| 508 | 1 | 2524 | 2543 | 2525 |
| 509 | 1 | 2761 | 2545 | 2528 |
| 510 | 1 | 2523 | 2545 | 2528 |
| 511 | 1 | 2484 | 2547 | 2527 |
| 512 | 1 | 2522 | 2547 | 2527 |
| 513 | 1 | 2561 | 2581 | 2566 |
| 514 | 1 | 2323 | 2581 | 2566 |
| 515 | 1 | 2602 | 2583 | 2565 |
| 516 | 1 | 2564 | 2583 | 2565 |
| 517 | 1 | 2801 | 2585 | 2568 |
| 518 | 1 | 2563 | 2585 | 2568 |
| 519 | 1 | 2524 | 2587 | 2567 |
| 520 | 1 | 2562 | 2587 | 2567 |
| 521 | 1 | 2601 | 2621 | 2606 |
| 522 | 1 | 2363 | 2621 | 2606 |
| 523 | 1 | 2402 | 2623 | 2605 |
| 524 | 1 | 2604 | 2623 | 2605 |
| 525 | 1 | 2841 | 2625 | 2608 |
| 526 | 1 | 2603 | 2625 | 2608 |
| 527 | 1 | 2564 | 2627 | 2607 |
| 528 | 1 | 2602 | 2627 | 2607 |
| 529 | 1 | 2641 | 2661 | 2646 |
| 530 | 1 | 2403 | 2661 | 2646 |
| 531 | 1 | 2682 | 2663 | 2645 |
| 532 | 1 | 2644 | 2663 | 2645 |
| 533 | 1 | 1921 | 2665 | 2648 |
| 534 | 1 | 2643 | 2665 | 2648 |
| 535 | 1 | 2844 | 2667 | 2647 |
| 536 | 1 | 2642 | 2667 | 2647 |
| 537 | 1 | 2681 | 2701 | 2686 |
| 538 | 1 | 2443 | 2701 | 2686 |
| 539 | 1 | 2722 | 2703 | 2685 |
| 540 | 1 | 2684 | 2703 | 2685 |
| 541 | 1 | 1961 | 2705 | 2688 |
| 542 | 1 | 2683 | 2705 | 2688 |
| 543 | 1 | 2644 | 2707 | 2687 |
| 544 | 1 | 2682 | 2707 | 2687 |
| 545 | 1 | 2721 | 2741 | 2726 |
| 546 | 1 | 2483 | 2741 | 2726 |
| 547 | 1 | 2762 | 2743 | 2725 |
| 548 | 1 | 2724 | 2743 | 2725 |
| 549 | 1 | 2001 | 2745 | 2728 |
| 550 | 1 | 2723 | 2745 | 2728 |
| 551 | 1 | 2684 | 2747 | 2727 |
| 552 | 1 | 2722 | 2747 | 2727 |
| 553 | 1 | 2761 | 2781 | 2766 |

554 1 2523 2781 2766  
555 1 2802 2783 2765  
556 1 2764 2783 2765  
557 1 2041 2785 2768  
558 1 2763 2785 2768  
559 1 2724 2787 2767  
560 1 2762 2787 2767  
561 1 2801 2821 2806  
562 1 2563 2821 2806  
563 1 2842 2823 2805  
564 1 2804 2823 2805  
565 1 2081 2825 2808  
566 1 2803 2825 2808  
567 1 2764 2827 2807  
568 1 2802 2827 2807  
569 1 2841 2861 2846  
570 1 2603 2861 2846  
571 1 2642 2863 2845  
572 1 2844 2863 2845  
573 1 2121 2865 2848  
574 1 2843 2865 2848  
575 1 2804 2867 2847  
576 1 2842 2867 2847  
577 1 2881 2901 2886  
578 1 3603 2901 2886  
579 1 2922 2903 2885  
580 1 2884 2903 2885  
581 1 3121 2905 2888  
582 1 2883 2905 2888  
583 1 3084 2907 2887  
584 1 2882 2907 2887  
585 1 2921 2941 2926  
586 1 3643 2941 2926  
587 1 2962 2943 2925  
588 1 2924 2943 2925  
589 1 3161 2945 2928  
590 1 2923 2945 2928  
591 1 2884 2947 2927  
592 1 2922 2947 2927  
593 1 2961 2981 2966  
594 1 3683 2981 2966  
595 1 3002 2983 2965  
596 1 2964 2983 2965  
597 1 3201 2985 2968  
598 1 2963 2985 2968  
599 1 2924 2987 2967  
600 1 2962 2987 2967  
601 1 3001 3021 3006  
602 1 3723 3021 3006  
603 1 3042 3023 3005  
604 1 3004 3023 3005  
605 1 3241 3025 3008  
606 1 3003 3025 3008  
607 1 2964 3027 3007  
608 1 3002 3027 3007  
609 1 3041 3061 3046  
610 1 3763 3061 3046  
611 1 3082 3063 3045  
612 1 3044 3063 3045  
613 1 3281 3065 3048  
614 1 3043 3065 3048  
615 1 3004 3067 3047  
616 1 3042 3067 3047  
617 1 3081 3101 3086  
618 1 3803 3101 3086  
619 1 2882 3103 3085  
620 1 3084 3103 3085  
621 1 3321 3105 3088  
622 1 3083 3105 3088  
623 1 3044 3107 3087  
624 1 3082 3107 3087  
625 1 3121 3141 3126  
626 1 2883 3141 3126  
627 1 3162 3143 3125  
628 1 3124 3143 3125  
629 1 3361 3145 3128  
630 1 3123 3145 3128  
631 1 3324 3147 3127  
632 1 3122 3147 3127  
633 1 3161 3181 3166  
634 1 2923 3181 3166  
635 1 3202 3183 3165  
636 1 3164 3183 3165  
637 1 3401 3185 3168  
638 1 3163 3185 3168  
639 1 3124 3187 3167  
640 1 3162 3187 3167  
641 1 3201 3221 3206  
642 1 2963 3221 3206  
643 1 3242 3223 3205  
644 1 3204 3223 3205  
645 1 3441 3225 3208  
646 1 3203 3225 3208

647 1 3164 3227 3207  
648 1 3202 3227 3207  
649 1 3241 3261 3246  
650 1 3003 3261 3246  
651 1 3282 3263 3245  
652 1 3244 3263 3245  
653 1 3481 3265 3248  
654 1 3243 3265 3248  
655 1 3204 3267 3247  
656 1 3242 3267 3247  
657 1 3281 3301 3286  
658 1 3043 3301 3286  
659 1 3322 3303 3285  
660 1 3284 3303 3285  
661 1 3521 3305 3288  
662 1 3283 3305 3288  
663 1 3244 3307 3287  
664 1 3282 3307 3287  
665 1 3321 3341 3326  
666 1 3083 3341 3326  
667 1 3122 3343 3325  
668 1 3324 3343 3325  
669 1 3561 3345 3328  
670 1 3323 3345 3328  
671 1 3284 3347 3327  
672 1 3322 3347 3327  
673 1 3361 3381 3366  
674 1 3123 3381 3366  
675 1 3402 3383 3365  
676 1 3364 3383 3365  
677 1 3601 3385 3368  
678 1 3363 3385 3368  
679 1 3564 3387 3367  
680 1 3362 3387 3367  
681 1 3401 3421 3406  
682 1 3163 3421 3406  
683 1 3442 3423 3405  
684 1 3404 3423 3405  
685 1 3641 3425 3408  
686 1 3403 3425 3408  
687 1 3364 3427 3407  
688 1 3402 3427 3407  
689 1 3441 3461 3446  
690 1 3203 3461 3446  
691 1 3482 3463 3445  
692 1 3444 3463 3445  
693 1 3681 3465 3448  
694 1 3443 3465 3448  
695 1 3404 3467 3447  
696 1 3442 3467 3447  
697 1 3481 3501 3486  
698 1 3243 3501 3486  
699 1 3522 3503 3485  
700 1 3484 3503 3485  
701 1 3721 3505 3488  
702 1 3483 3505 3488  
703 1 3444 3507 3487  
704 1 3482 3507 3487  
705 1 3521 3541 3526  
706 1 3283 3541 3526  
707 1 3562 3543 3525  
708 1 3524 3543 3525  
709 1 3761 3545 3528  
710 1 3523 3545 3528  
711 1 3484 3547 3527  
712 1 3522 3547 3527  
713 1 3561 3581 3566  
714 1 3323 3581 3566  
715 1 3362 3583 3565  
716 1 3564 3583 3565  
717 1 3801 3585 3568  
718 1 3563 3585 3568  
719 1 3524 3587 3567  
720 1 3562 3587 3567  
721 1 3601 3621 3606  
722 1 3363 3621 3606  
723 1 3642 3623 3605  
724 1 3604 3623 3605  
725 1 2881 3625 3608  
726 1 3603 3625 3608  
727 1 3804 3627 3607  
728 1 3602 3627 3607  
729 1 3641 3661 3646  
730 1 3403 3661 3646  
731 1 3682 3663 3645  
732 1 3644 3663 3645  
733 1 2921 3665 3648  
734 1 3643 3665 3648  
735 1 3604 3667 3647  
736 1 3642 3667 3647  
737 1 3681 3701 3686  
738 1 3443 3701 3686  
739 1 3722 3703 3685

```

740 1 3684 3703 3685
741 1 2961 3705 3688
742 1 3683 3705 3688
743 1 3644 3707 3687
744 1 3682 3707 3687
745 1 3721 3741 3726
746 1 3483 3741 3726
747 1 3762 3743 3725
748 1 3724 3743 3725
749 1 3001 3745 3728
750 1 3723 3745 3728
751 1 3684 3747 3727
752 1 3722 3747 3727
753 1 3761 3781 3766
754 1 3523 3781 3766
755 1 3802 3783 3765
756 1 3764 3783 3765
757 1 3041 3785 3768
758 1 3763 3785 3768
759 1 3724 3787 3767
760 1 3762 3787 3767
761 1 3801 3821 3806
762 1 3563 3821 3806
763 1 3602 3823 3805
764 1 3804 3823 3805
765 1 3081 3825 3808
766 1 3803 3825 3808
767 1 3764 3827 3807
768 1 3802 3827 3807

```

## LAMMPS Input Script:

```

units      real
atom_style full
boundary   p p p
pair_style lj/cut/coul/long 10
pair_modify mix arithmetic
angle_style harmonic
bond_style morse

read_data  bulky-6x4x4Clean.data

kspace_style ewald 0.0001
special_bonds lj 0.0 0.0 0.5
special_bonds coul 0.0 0.0 0.8333

thermo_style custom step etotal ke pe ebond eangle edihed evdwl ecoul elong temp press vol lx ly lz
thermo_modify lost error
thermo     100

timestep   1.0
run_style  respa 2 2 pair 1 kspace 2

velocity all create 298 1103 dist gaussian

fix 1 all nve
fix 2 all temp/rescale 1 298.0 298.0 5 1.0

restart 10000 restart.1 restart.2

run 1000000

unfix 2

run 1000000

timestep .001

unfix 1
fix 3 all nve
fix 4 all press/berendsen aniso 10000 1.0 10000.0
fix 5 all temp/rescale 1 298.0 298.0 5 1.0

run 1000000

unfix 4
unfix 5
fix 6 all press/berendsen aniso 1.0 1.0 10000.0
fix 7 all temp/berendsen 298.0 298.0 100.0
timestep .01

run 1000000

timestep .1
unfix 6
unfix 7
fix 8 all press/berendsen aniso 1.0 1.0 100000.0
fix 9 all temp/berendsen 298.0 298.0 100.0

run 1000000

```

```

timestep 1.0

unfix 8
unfix 9
fix 10 all press/berendsen aniso 1.0 1.0 1000000.0
fix 11 all temp/berendsen 298.0 298.0 100.0

run 10000000

unfix 10
unfix 11

run 10000000

dump 1 all custom 2 dump.velo type id x y z vx vy vz
dump_modify 1 sort 2

run 1000000

```

## Bulk Pyrophyllite Without Angle Bending Term

### LAMMPS Data File:

LAMMPS data file. clayff2lmp v1.0.0 / 03 Oct 2017 / CGMM for bulkpy-6x4x4-noangClean

```

3840 atoms
384 bonds
0 angles
0 dihedrals
0 impropers

5 atom types
1 bond types types

-15.530100000 15.530100000 xlo xhi
-17.818200000 17.818200000 ylo yhi
-18.665000000 18.665000000 zlo zhi

```

#### Masses

```

1 26.981540 # ao
2 1.007970 # ho
3 15.999400 # ob
4 15.999400 # oh
5 28.085500 # st

```

#### Pair Coeffs # lj/cut/coul/long

```

1 0.0000013297 4.2713219316 # ao
2 0.0000000000 0.0000000000 # ho
3 0.1554164124 3.1655200879 # ob
4 0.1554164124 3.1655200879 # oh
5 0.0000018402 3.3019566252 # st

```

#### Bond Coeffs # harmonic

```

1 132.2491 2.1815 0.945 # ho-oh

```

#### Atoms # full

```

1 1 1 1.575000 2.588555029 1.474661568 0.000270632 0 0 0 # ao
2 1 1 1.575000 0.000205029 5.929211568 0.000270632 0 0 0 # ao
3 1 1 1.575000 2.588144971 7.434438432 -0.000270632 0 0 0 # ao
4 1 1 1.575000 5.176494971 2.979888432 -0.000270632 0 0 0 # ao
5 1 2 0.425000 3.734650872 4.457267322 1.486115063 0 0 0 # ho
6 1 2 0.425000 1.146300872 0.002717322 1.486115063 0 0 0 # ho
7 1 2 0.425000 1.442049128 4.451832678 -1.486115063 0 0 0 # ho
8 1 2 0.425000 4.030399128 8.906382678 -1.486115063 0 0 0 # ho
9 1 3 -1.050000 0.981314655 1.677501481 -1.033422068 0 0 0 # ob
10 1 3 -1.050000 5.023517264 6.305096126 -3.231846262 0 0 0 # ob
11 1 3 -1.050000 3.570244487 2.773649320 -1.033631378 0 0 0 # ob
12 1 3 -1.050000 2.434839092 7.048710300 -3.233079711 0 0 0 # ob
13 1 3 -1.050000 0.981894487 7.228199320 -1.033631378 0 0 0 # ob
14 1 3 -1.050000 1.606455513 6.135450680 1.033631378 0 0 0 # ob
15 1 3 -1.050000 5.023189092 2.594160300 -3.233079711 0 0 0 # ob
16 1 3 -1.050000 1.607035345 2.777048519 1.033422068 0 0 0 # ob
17 1 3 -1.050000 2.741532736 7.058553874 3.231846262 0 0 0 # ob
18 1 3 -1.050000 4.195385345 7.231598519 1.033422068 0 0 0 # ob
19 1 3 -1.050000 0.153182736 2.604003874 3.231846262 0 0 0 # ob
20 1 3 -1.050000 2.741860908 1.860389700 3.233079711 0 0 0 # ob
21 1 4 -0.950000 1.999257657 0.000940996 1.012582885 0 0 0 # oh
22 1 3 -1.050000 4.667081651 0.003976970 3.061482417 0 0 0 # ob
23 1 4 -0.950000 4.587607657 4.455490996 1.012582885 0 0 0 # oh
24 1 3 -1.050000 2.078731651 4.458526970 3.061482417 0 0 0 # ob
25 1 4 -0.950000 3.177442343 8.908159004 -1.012582885 0 0 0 # oh
26 1 3 -1.050000 0.509618349 8.905123030 -3.061482417 0 0 0 # ob
27 1 4 -0.950000 0.589092343 4.453609004 -1.012582885 0 0 0 # oh

```



|     |   |   |           |              |             |              |   |   |   |    |
|-----|---|---|-----------|--------------|-------------|--------------|---|---|---|----|
| 28  | 1 | 3 | -1.050000 | 3.097968349  | 4.450573030 | -3.061482417 | 0 | 0 | 0 | ob |
| 29  | 1 | 3 | -1.050000 | 4.194805513  | 1.680900680 | 1.033631378  | 0 | 0 | 0 | ob |
| 30  | 1 | 3 | -1.050000 | 0.153510908  | 6.314939700 | 3.233079711  | 0 | 0 | 0 | ob |
| 31  | 1 | 3 | -1.050000 | 3.569664655  | 6.132051481 | -1.033422068 | 0 | 0 | 0 | ob |
| 32  | 1 | 3 | -1.050000 | 2.435167264  | 1.850546126 | -3.231846262 | 0 | 0 | 0 | ob |
| 33  | 1 | 5 | 2.100000  | 4.222997014  | 1.527119204 | 2.662777170  | 0 | 0 | 0 | st |
| 34  | 1 | 5 | 2.100000  | 3.542027774  | 5.973370782 | -2.661798097 | 0 | 0 | 0 | st |
| 35  | 1 | 5 | 2.100000  | 0.953702986  | 7.381980796 | -2.662777170 | 0 | 0 | 0 | st |
| 36  | 1 | 5 | 2.100000  | 3.542052986  | 2.927430796 | -2.662777170 | 0 | 0 | 0 | st |
| 37  | 1 | 5 | 2.100000  | 4.223022226  | 7.390279218 | 2.661798097  | 0 | 0 | 0 | st |
| 38  | 1 | 5 | 2.100000  | 1.634672226  | 2.935729218 | 2.661798097  | 0 | 0 | 0 | st |
| 39  | 1 | 5 | 2.100000  | 1.634647014  | 5.981669204 | 2.662777170  | 0 | 0 | 0 | st |
| 40  | 1 | 5 | 2.100000  | 0.953677774  | 1.518820782 | -2.661798097 | 0 | 0 | 0 | st |
| 41  | 1 | 1 | 1.575000  | 7.765255029  | 1.474661568 | 0.000270632  | 0 | 0 | 0 | ao |
| 42  | 1 | 1 | 1.575000  | 5.176905029  | 5.929211568 | 0.000270632  | 0 | 0 | 0 | ao |
| 43  | 1 | 1 | 1.575000  | 7.764844971  | 7.434438432 | -0.000270632 | 0 | 0 | 0 | ao |
| 44  | 1 | 1 | 1.575000  | 10.353194971 | 2.979888432 | -0.000270632 | 0 | 0 | 0 | ao |
| 45  | 1 | 2 | 0.425000  | 8.911350872  | 4.457267322 | 1.486115063  | 0 | 0 | 0 | ho |
| 46  | 1 | 2 | 0.425000  | 6.323000872  | 0.002717322 | 1.486115063  | 0 | 0 | 0 | ho |
| 47  | 1 | 2 | 0.425000  | 6.618749128  | 4.451832678 | -1.486115063 | 0 | 0 | 0 | ho |
| 48  | 1 | 2 | 0.425000  | 9.207099128  | 8.906382678 | -1.486115063 | 0 | 0 | 0 | ho |
| 49  | 1 | 3 | -1.050000 | 6.158014655  | 1.677501481 | -1.033422068 | 0 | 0 | 0 | ob |
| 50  | 1 | 3 | -1.050000 | 10.200217264 | 6.305096126 | -3.231846262 | 0 | 0 | 0 | ob |
| 51  | 1 | 3 | -1.050000 | 8.746944487  | 2.773649320 | -1.033631378 | 0 | 0 | 0 | ob |
| 52  | 1 | 3 | -1.050000 | 7.611539092  | 7.048710300 | -3.233079711 | 0 | 0 | 0 | ob |
| 53  | 1 | 3 | -1.050000 | 6.158594487  | 7.228199320 | -1.033631378 | 0 | 0 | 0 | ob |
| 54  | 1 | 3 | -1.050000 | 6.783155513  | 6.135450680 | 1.033631378  | 0 | 0 | 0 | ob |
| 55  | 1 | 3 | -1.050000 | 10.199889092 | 2.594160300 | -3.233079711 | 0 | 0 | 0 | ob |
| 56  | 1 | 3 | -1.050000 | 6.783735345  | 2.777048519 | 1.033422068  | 0 | 0 | 0 | ob |
| 57  | 1 | 3 | -1.050000 | 7.918232736  | 7.058553874 | 3.231846262  | 0 | 0 | 0 | ob |
| 58  | 1 | 3 | -1.050000 | 9.372085345  | 7.231598519 | 1.033422068  | 0 | 0 | 0 | ob |
| 59  | 1 | 3 | -1.050000 | 5.329882736  | 2.604003874 | 3.231846262  | 0 | 0 | 0 | ob |
| 60  | 1 | 3 | -1.050000 | 7.918560908  | 1.860389700 | 3.233079711  | 0 | 0 | 0 | ob |
| 61  | 1 | 4 | -0.950000 | 7.175957657  | 0.000940996 | 1.012582885  | 0 | 0 | 0 | oh |
| 62  | 1 | 3 | -1.050000 | 9.843781651  | 0.003976970 | 3.061482417  | 0 | 0 | 0 | ob |
| 63  | 1 | 4 | -0.950000 | 9.764307657  | 4.455490996 | 1.012582885  | 0 | 0 | 0 | oh |
| 64  | 1 | 3 | -1.050000 | 7.255431651  | 4.458526970 | 3.061482417  | 0 | 0 | 0 | ob |
| 65  | 1 | 4 | -0.950000 | 8.354142343  | 8.908159004 | -1.012582885 | 0 | 0 | 0 | oh |
| 66  | 1 | 3 | -1.050000 | 5.686318349  | 8.905123030 | -3.061482417 | 0 | 0 | 0 | ob |
| 67  | 1 | 4 | -0.950000 | 5.765792343  | 4.453609004 | -1.012582885 | 0 | 0 | 0 | oh |
| 68  | 1 | 3 | -1.050000 | 8.274668349  | 4.450573030 | -3.061482417 | 0 | 0 | 0 | ob |
| 69  | 1 | 3 | -1.050000 | 9.371505513  | 1.680900680 | 1.033631378  | 0 | 0 | 0 | ob |
| 70  | 1 | 3 | -1.050000 | 5.330210908  | 6.314939700 | 3.233079711  | 0 | 0 | 0 | ob |
| 71  | 1 | 3 | -1.050000 | 8.746364655  | 6.132051481 | -1.033422068 | 0 | 0 | 0 | ob |
| 72  | 1 | 3 | -1.050000 | 7.611867264  | 1.850546126 | -3.231846262 | 0 | 0 | 0 | ob |
| 73  | 1 | 5 | 2.100000  | 9.399697014  | 1.527119204 | 2.662777170  | 0 | 0 | 0 | st |
| 74  | 1 | 5 | 2.100000  | 8.718727774  | 5.973370782 | -2.661798097 | 0 | 0 | 0 | st |
| 75  | 1 | 5 | 2.100000  | 6.130402986  | 7.381980796 | -2.662777170 | 0 | 0 | 0 | st |
| 76  | 1 | 5 | 2.100000  | 8.718752986  | 2.927430796 | -2.662777170 | 0 | 0 | 0 | st |
| 77  | 1 | 5 | 2.100000  | 9.399722226  | 7.390279218 | 2.661798097  | 0 | 0 | 0 | st |
| 78  | 1 | 5 | 2.100000  | 6.811372226  | 2.935729218 | 2.661798097  | 0 | 0 | 0 | st |
| 79  | 1 | 5 | 2.100000  | 6.811347014  | 5.981669204 | 2.662777170  | 0 | 0 | 0 | st |
| 80  | 1 | 5 | 2.100000  | 6.130377774  | 1.518820782 | -2.661798097 | 0 | 0 | 0 | st |
| 81  | 1 | 1 | 1.575000  | 12.941955029 | 1.474661568 | 0.000270632  | 0 | 0 | 0 | ao |
| 82  | 1 | 1 | 1.575000  | 10.353605029 | 5.929211568 | 0.000270632  | 0 | 0 | 0 | ao |
| 83  | 1 | 1 | 1.575000  | 12.941544971 | 7.434438432 | -0.000270632 | 0 | 0 | 0 | ao |
| 84  | 1 | 1 | 1.575000  | 15.529894971 | 2.979888432 | -0.000270632 | 0 | 0 | 0 | ao |
| 85  | 1 | 2 | 0.425000  | 14.088050872 | 4.457267322 | 1.486115063  | 0 | 0 | 0 | ho |
| 86  | 1 | 2 | 0.425000  | 11.499700872 | 0.002717322 | 1.486115063  | 0 | 0 | 0 | ho |
| 87  | 1 | 2 | 0.425000  | 11.795449128 | 4.451832678 | -1.486115063 | 0 | 0 | 0 | ho |
| 88  | 1 | 2 | 0.425000  | 14.383799128 | 8.906382678 | -1.486115063 | 0 | 0 | 0 | ho |
| 89  | 1 | 3 | -1.050000 | 11.334714655 | 1.677501481 | -1.033422068 | 0 | 0 | 0 | ob |
| 90  | 1 | 3 | -1.050000 | 15.376917264 | 6.305096126 | -3.231846262 | 0 | 0 | 0 | ob |
| 91  | 1 | 3 | -1.050000 | 13.923644487 | 2.773649320 | -1.033631378 | 0 | 0 | 0 | ob |
| 92  | 1 | 3 | -1.050000 | 12.788239092 | 7.048710300 | -3.233079711 | 0 | 0 | 0 | ob |
| 93  | 1 | 3 | -1.050000 | 11.335294487 | 7.228199320 | -1.033631378 | 0 | 0 | 0 | ob |
| 94  | 1 | 3 | -1.050000 | 11.959855513 | 6.135450680 | 1.033631378  | 0 | 0 | 0 | ob |
| 95  | 1 | 3 | -1.050000 | 15.376589092 | 2.594160300 | -3.233079711 | 0 | 0 | 0 | ob |
| 96  | 1 | 3 | -1.050000 | 11.960435345 | 2.777048519 | 1.033422068  | 0 | 0 | 0 | ob |
| 97  | 1 | 3 | -1.050000 | 13.094932736 | 7.058553874 | 3.231846262  | 0 | 0 | 0 | ob |
| 98  | 1 | 3 | -1.050000 | 14.548785345 | 7.231598519 | 1.033422068  | 0 | 0 | 0 | ob |
| 99  | 1 | 3 | -1.050000 | 10.506582736 | 2.604003874 | 3.231846262  | 0 | 0 | 0 | ob |
| 100 | 1 | 3 | -1.050000 | 13.095260908 | 1.860389700 | 3.233079711  | 0 | 0 | 0 | ob |
| 101 | 1 | 4 | -0.950000 | 12.352657657 | 0.000940996 | 1.012582885  | 0 | 0 | 0 | oh |
| 102 | 1 | 3 | -1.050000 | 15.020481651 | 0.003976970 | 3.061482417  | 0 | 0 | 0 | ob |
| 103 | 1 | 4 | -0.950000 | 14.941007657 | 4.455490996 | 1.012582885  | 0 | 0 | 0 | oh |
| 104 | 1 | 3 | -1.050000 | 12.432131651 | 4.458526970 | 3.061482417  | 0 | 0 | 0 | ob |
| 105 | 1 | 4 | -0.950000 | 13.530842343 | 8.908159004 | -1.012582885 | 0 | 0 | 0 | oh |
| 106 | 1 | 3 | -1.050000 | 10.863018349 | 8.905123030 | -3.061482417 | 0 | 0 | 0 | ob |
| 107 | 1 | 4 | -0.950000 | 10.942492343 | 4.453609004 | -1.012582885 | 0 | 0 | 0 | oh |
| 108 | 1 | 3 | -1.050000 | 13.451368349 | 4.450573030 | -3.061482417 | 0 | 0 | 0 | ob |
| 109 | 1 | 3 | -1.050000 | 14.548205513 | 1.680900680 | 1.033631378  | 0 | 0 | 0 | ob |
| 110 | 1 | 3 | -1.050000 | 10.506910908 | 6.314939700 | 3.233079711  | 0 | 0 | 0 | ob |
| 111 | 1 | 3 | -1.050000 | 13.923064655 | 6.132051481 | -1.033422068 | 0 | 0 | 0 | ob |
| 112 | 1 | 3 | -1.050000 | 12.788567264 | 1.850546126 | -3.231846262 | 0 | 0 | 0 | ob |
| 113 | 1 | 5 | 2.100000  | 14.576397014 | 1.527119204 | 2.662777170  | 0 | 0 | 0 | st |
| 114 | 1 | 5 | 2.100000  | 13.895427774 | 5.973370782 | -2.661798097 | 0 | 0 | 0 | st |
| 115 | 1 | 5 | 2.100000  | 11.307102986 | 7.381980796 | -2.662777170 | 0 | 0 | 0 | st |
| 116 | 1 | 5 | 2.100000  | 13.895452986 | 2.927430796 | -2.662777170 | 0 | 0 | 0 | st |
| 117 | 1 | 5 | 2.100000  | 14.576422226 | 7.390279218 | 2.661798097  | 0 | 0 | 0 | st |
| 118 | 1 | 5 | 2.100000  | 11.988072226 | 2.935729218 | 2.661798097  | 0 | 0 | 0 | st |
| 119 | 1 | 5 | 2.100000  | 11.988047014 | 5.981669204 | 2.662777170  | 0 | 0 | 0 | st |
| 120 | 1 | 5 | 2.100000  | 11.307077774 | 1.518820782 | -2.661798097 | 0 | 0 | 0 | st |

|     |   |   |           |               |             |              |   |   |   |   |    |
|-----|---|---|-----------|---------------|-------------|--------------|---|---|---|---|----|
| 121 | 1 | 1 | 1.575000  | -12.941544971 | 1.474661568 | 0.000270632  | 1 | 0 | 0 | # | ao |
| 122 | 1 | 1 | 1.575000  | -15.529894971 | 5.929211568 | 0.000270632  | 1 | 0 | 0 | # | ao |
| 123 | 1 | 1 | 1.575000  | -12.941955029 | 7.434438432 | -0.000270632 | 1 | 0 | 0 | # | ao |
| 124 | 1 | 1 | 1.575000  | -10.353605029 | 2.979888432 | -0.000270632 | 1 | 0 | 0 | # | ao |
| 125 | 1 | 2 | 0.425000  | -11.795449128 | 4.457267322 | 1.486115063  | 1 | 0 | 0 | # | ho |
| 126 | 1 | 2 | 0.425000  | -14.383799128 | 0.002717322 | 1.486115063  | 1 | 0 | 0 | # | ho |
| 127 | 1 | 2 | 0.425000  | -14.088050872 | 4.451832678 | -1.486115063 | 1 | 0 | 0 | # | ho |
| 128 | 1 | 2 | 0.425000  | -11.499700872 | 8.906382678 | -1.486115063 | 1 | 0 | 0 | # | ho |
| 129 | 1 | 3 | -1.050000 | -14.548785345 | 1.677501481 | -1.033422068 | 1 | 0 | 0 | # | ob |
| 130 | 1 | 3 | -1.050000 | -10.506582736 | 6.305096126 | -3.231846262 | 1 | 0 | 0 | # | ob |
| 131 | 1 | 3 | -1.050000 | -11.959855513 | 2.773649320 | -1.033631378 | 1 | 0 | 0 | # | ob |
| 132 | 1 | 3 | -1.050000 | -13.095260908 | 7.048710300 | -3.233079711 | 1 | 0 | 0 | # | ob |
| 133 | 1 | 3 | -1.050000 | -14.548205513 | 7.228199320 | -1.033631378 | 1 | 0 | 0 | # | ob |
| 134 | 1 | 3 | -1.050000 | -13.923644487 | 6.135450680 | 1.033631378  | 1 | 0 | 0 | # | ob |
| 135 | 1 | 3 | -1.050000 | -10.506910908 | 2.594160300 | -3.233079711 | 1 | 0 | 0 | # | ob |
| 136 | 1 | 3 | -1.050000 | -13.923064655 | 2.777048519 | 1.033422068  | 1 | 0 | 0 | # | ob |
| 137 | 1 | 3 | -1.050000 | -12.788567264 | 7.058553874 | 3.231846262  | 1 | 0 | 0 | # | ob |
| 138 | 1 | 3 | -1.050000 | -11.334714655 | 7.231598519 | 1.033422068  | 1 | 0 | 0 | # | ob |
| 139 | 1 | 3 | -1.050000 | -15.376917264 | 2.604003874 | 3.231846262  | 1 | 0 | 0 | # | ob |
| 140 | 1 | 3 | -1.050000 | -12.788239092 | 1.860389700 | 3.233079711  | 1 | 0 | 0 | # | ob |
| 141 | 1 | 4 | -0.950000 | -13.530842343 | 0.000940996 | 1.012582885  | 1 | 0 | 0 | # | oh |
| 142 | 1 | 3 | -1.050000 | -10.863018349 | 0.003976970 | 3.061482417  | 1 | 0 | 0 | # | ob |
| 143 | 1 | 4 | -0.950000 | -10.942492343 | 4.455490996 | 1.012582885  | 1 | 0 | 0 | # | oh |
| 144 | 1 | 3 | -1.050000 | -13.451368349 | 4.458526970 | 3.061482417  | 1 | 0 | 0 | # | ob |
| 145 | 1 | 4 | -0.950000 | -12.352657657 | 8.908159004 | -1.012582885 | 1 | 0 | 0 | # | oh |
| 146 | 1 | 3 | -1.050000 | -15.020481651 | 8.905123030 | -3.061482417 | 1 | 0 | 0 | # | ob |
| 147 | 1 | 4 | -0.950000 | -14.941007657 | 4.453609004 | -1.012582885 | 1 | 0 | 0 | # | oh |
| 148 | 1 | 3 | -1.050000 | -12.432131651 | 4.450573030 | -3.061482417 | 1 | 0 | 0 | # | ob |
| 149 | 1 | 3 | -1.050000 | -11.335294487 | 1.680900680 | 1.033631378  | 1 | 0 | 0 | # | ob |
| 150 | 1 | 3 | -1.050000 | -15.376589092 | 6.314939700 | 3.233079711  | 1 | 0 | 0 | # | ob |
| 151 | 1 | 3 | -1.050000 | -11.960435345 | 6.132051481 | -1.033422068 | 1 | 0 | 0 | # | ob |
| 152 | 1 | 3 | -1.050000 | -13.094932736 | 1.850546126 | -3.231846262 | 1 | 0 | 0 | # | ob |
| 153 | 1 | 5 | 2.100000  | -11.307102986 | 1.527119204 | 2.662777170  | 1 | 0 | 0 | # | st |
| 154 | 1 | 5 | 2.100000  | -11.988072226 | 5.973370782 | -2.661798097 | 1 | 0 | 0 | # | st |
| 155 | 1 | 5 | 2.100000  | -14.576397014 | 7.381980796 | -2.662777170 | 1 | 0 | 0 | # | st |
| 156 | 1 | 5 | 2.100000  | -11.988047014 | 2.927430796 | -2.662777170 | 1 | 0 | 0 | # | st |
| 157 | 1 | 5 | 2.100000  | -11.307077774 | 7.390279218 | 2.661798097  | 1 | 0 | 0 | # | st |
| 158 | 1 | 5 | 2.100000  | -13.895427774 | 2.935729218 | 2.661798097  | 1 | 0 | 0 | # | st |
| 159 | 1 | 5 | 2.100000  | -13.895452986 | 5.981669204 | 2.662777170  | 1 | 0 | 0 | # | st |
| 160 | 1 | 5 | 2.100000  | -14.576422226 | 1.518820782 | -2.661798097 | 1 | 0 | 0 | # | st |
| 161 | 1 | 1 | 1.575000  | -7.764844971  | 1.474661568 | 0.000270632  | 1 | 0 | 0 | # | ao |
| 162 | 1 | 1 | 1.575000  | -10.353194971 | 5.929211568 | 0.000270632  | 1 | 0 | 0 | # | ao |
| 163 | 1 | 1 | 1.575000  | -7.765255029  | 7.434438432 | -0.000270632 | 1 | 0 | 0 | # | ao |
| 164 | 1 | 1 | 1.575000  | -5.176905029  | 2.979888432 | -0.000270632 | 1 | 0 | 0 | # | ao |
| 165 | 1 | 2 | 0.425000  | -6.618749128  | 4.457267322 | 1.486115063  | 1 | 0 | 0 | # | ho |
| 166 | 1 | 2 | 0.425000  | -9.207099128  | 0.002717322 | 1.486115063  | 1 | 0 | 0 | # | ho |
| 167 | 1 | 2 | 0.425000  | -8.911350872  | 4.451832678 | -1.486115063 | 1 | 0 | 0 | # | ho |
| 168 | 1 | 2 | 0.425000  | -6.323000872  | 8.906382678 | -1.486115063 | 1 | 0 | 0 | # | ho |
| 169 | 1 | 3 | -1.050000 | -9.372085345  | 1.677501481 | -1.033422068 | 1 | 0 | 0 | # | ob |
| 170 | 1 | 3 | -1.050000 | -5.329882736  | 6.305096126 | -3.231846262 | 1 | 0 | 0 | # | ob |
| 171 | 1 | 3 | -1.050000 | -6.783155513  | 2.773649320 | -1.033631378 | 1 | 0 | 0 | # | ob |
| 172 | 1 | 3 | -1.050000 | -7.918560908  | 7.048710300 | -3.233079711 | 1 | 0 | 0 | # | ob |
| 173 | 1 | 3 | -1.050000 | -9.371505513  | 7.228199320 | -1.033631378 | 1 | 0 | 0 | # | ob |
| 174 | 1 | 3 | -1.050000 | -8.746944487  | 6.135450680 | 1.033631378  | 1 | 0 | 0 | # | ob |
| 175 | 1 | 3 | -1.050000 | -5.330210908  | 2.594160300 | -3.233079711 | 1 | 0 | 0 | # | ob |
| 176 | 1 | 3 | -1.050000 | -8.746364655  | 2.777048519 | 1.033422068  | 1 | 0 | 0 | # | ob |
| 177 | 1 | 3 | -1.050000 | -7.611867264  | 7.058553874 | 3.231846262  | 1 | 0 | 0 | # | ob |
| 178 | 1 | 3 | -1.050000 | -6.158014655  | 7.231598519 | 1.033422068  | 1 | 0 | 0 | # | ob |
| 179 | 1 | 3 | -1.050000 | -10.200217264 | 2.604003874 | 3.231846262  | 1 | 0 | 0 | # | ob |
| 180 | 1 | 3 | -1.050000 | -7.611539092  | 1.860389700 | 3.233079711  | 1 | 0 | 0 | # | ob |
| 181 | 1 | 4 | -0.950000 | -8.354142343  | 0.000940996 | 1.012582885  | 1 | 0 | 0 | # | oh |
| 182 | 1 | 3 | -1.050000 | -5.686318349  | 0.003976970 | 3.061482417  | 1 | 0 | 0 | # | ob |
| 183 | 1 | 4 | -0.950000 | -5.765792343  | 4.455490996 | 1.012582885  | 1 | 0 | 0 | # | oh |
| 184 | 1 | 3 | -1.050000 | -8.274668349  | 4.458526970 | 3.061482417  | 1 | 0 | 0 | # | ob |
| 185 | 1 | 4 | -0.950000 | -7.175957657  | 8.908159004 | -1.012582885 | 1 | 0 | 0 | # | oh |
| 186 | 1 | 3 | -1.050000 | -9.843781651  | 8.905123030 | -3.061482417 | 1 | 0 | 0 | # | ob |
| 187 | 1 | 4 | -0.950000 | -9.764307657  | 4.453609004 | -1.012582885 | 1 | 0 | 0 | # | oh |
| 188 | 1 | 3 | -1.050000 | -7.255431651  | 4.450573030 | -3.061482417 | 1 | 0 | 0 | # | ob |
| 189 | 1 | 3 | -1.050000 | -6.158594487  | 1.680900680 | 1.033631378  | 1 | 0 | 0 | # | ob |
| 190 | 1 | 3 | -1.050000 | -10.199889092 | 6.314939700 | 3.233079711  | 1 | 0 | 0 | # | ob |
| 191 | 1 | 3 | -1.050000 | -6.783735345  | 6.132051481 | -1.033422068 | 1 | 0 | 0 | # | ob |
| 192 | 1 | 3 | -1.050000 | -7.918232736  | 1.850546126 | -3.231846262 | 1 | 0 | 0 | # | ob |
| 193 | 1 | 5 | 2.100000  | -6.130402986  | 1.527119204 | 2.662777170  | 1 | 0 | 0 | # | st |
| 194 | 1 | 5 | 2.100000  | -6.811372226  | 5.973370782 | -2.661798097 | 1 | 0 | 0 | # | st |
| 195 | 1 | 5 | 2.100000  | -9.399697014  | 7.381980796 | -2.662777170 | 1 | 0 | 0 | # | st |
| 196 | 1 | 5 | 2.100000  | -6.811347014  | 2.927430796 | -2.662777170 | 1 | 0 | 0 | # | st |
| 197 | 1 | 5 | 2.100000  | -6.130377774  | 7.390279218 | 2.661798097  | 1 | 0 | 0 | # | st |
| 198 | 1 | 5 | 2.100000  | -8.718727774  | 2.935729218 | 2.661798097  | 1 | 0 | 0 | # | st |
| 199 | 1 | 5 | 2.100000  | -8.718752986  | 5.981669204 | 2.662777170  | 1 | 0 | 0 | # | st |
| 200 | 1 | 5 | 2.100000  | -9.399722226  | 1.518820782 | -2.661798097 | 1 | 0 | 0 | # | st |
| 201 | 1 | 1 | 1.575000  | -2.588144971  | 1.474661568 | 0.000270632  | 1 | 0 | 0 | # | ao |
| 202 | 1 | 1 | 1.575000  | -5.176494971  | 5.929211568 | 0.000270632  | 1 | 0 | 0 | # | ao |
| 203 | 1 | 1 | 1.575000  | -2.588555029  | 7.434438432 | -0.000270632 | 1 | 0 | 0 | # | ao |
| 204 | 1 | 1 | 1.575000  | -0.000205029  | 2.979888432 | -0.000270632 | 1 | 0 | 0 | # | ao |
| 205 | 1 | 2 | 0.425000  | -1.442049128  | 4.457267322 | 1.486115063  | 1 | 0 | 0 | # | ho |
| 206 | 1 | 2 | 0.425000  | -4.030399128  | 0.002717322 | 1.486115063  | 1 | 0 | 0 | # | ho |
| 207 | 1 | 2 | 0.425000  | -3.734650872  | 4.451832678 | -1.486115063 | 1 | 0 | 0 | # | ho |
| 208 | 1 | 2 | 0.425000  | -1.146300872  | 8.906382678 | -1.486115063 | 1 | 0 | 0 | # | ho |
| 209 | 1 | 3 | -1.050000 | -4.195385345  | 1.677501481 | -1.033422068 | 1 | 0 | 0 | # | ob |
| 210 | 1 | 3 | -1.050000 | -0.153182736  | 6.305096126 | -3.231846262 | 1 | 0 | 0 | # | ob |
| 211 | 1 | 3 | -1.050000 | -1.606455513  | 2.773649320 | -1.033631378 | 1 | 0 | 0 | # | ob |
| 212 | 1 | 3 | -1.050000 | -2.741860908  | 7.048710300 | -3.233079711 | 1 | 0 | 0 | # | ob |
| 213 | 1 | 3 | -1.050000 | -4.194805513  | 7.228199320 | -1.033631378 | 1 | 0 | 0 | # | ob |

|     |   |   |           |              |              |              |   |   |   |   |    |
|-----|---|---|-----------|--------------|--------------|--------------|---|---|---|---|----|
| 214 | 1 | 3 | -1.050000 | -3.570244487 | 6.135450680  | 1.033631378  | 1 | 0 | 0 | # | ob |
| 215 | 1 | 3 | -1.050000 | -0.153510908 | 2.594160300  | -3.233079711 | 1 | 0 | 0 | # | ob |
| 216 | 1 | 3 | -1.050000 | -3.569664655 | 2.777048519  | 1.033422068  | 1 | 0 | 0 | # | ob |
| 217 | 1 | 3 | -1.050000 | -2.435167264 | 7.058553874  | 3.231846262  | 1 | 0 | 0 | # | ob |
| 218 | 1 | 3 | -1.050000 | -0.981314655 | 7.231598519  | 1.033422068  | 1 | 0 | 0 | # | ob |
| 219 | 1 | 3 | -1.050000 | -5.023517264 | 2.604003874  | 3.231846262  | 1 | 0 | 0 | # | ob |
| 220 | 1 | 3 | -1.050000 | -2.434839092 | 1.860389700  | 3.233079711  | 1 | 0 | 0 | # | ob |
| 221 | 1 | 4 | -0.950000 | -3.177442343 | 0.000940996  | 1.012582885  | 1 | 0 | 0 | # | oh |
| 222 | 1 | 3 | -1.050000 | -0.509618349 | 0.003976970  | 3.061482417  | 1 | 0 | 0 | # | ob |
| 223 | 1 | 4 | -0.950000 | -0.589092343 | 4.455490996  | 1.012582885  | 1 | 0 | 0 | # | oh |
| 224 | 1 | 3 | -1.050000 | -3.097968349 | 4.458526970  | 3.061482417  | 1 | 0 | 0 | # | ob |
| 225 | 1 | 4 | -0.950000 | -1.999257657 | 8.908159004  | -1.012582885 | 1 | 0 | 0 | # | oh |
| 226 | 1 | 3 | -1.050000 | -4.667081651 | 8.905123030  | -3.061482417 | 1 | 0 | 0 | # | ob |
| 227 | 1 | 4 | -0.950000 | -4.587607657 | 4.453609004  | -1.012582885 | 1 | 0 | 0 | # | oh |
| 228 | 1 | 3 | -1.050000 | -2.078731651 | 4.450573030  | -3.061482417 | 1 | 0 | 0 | # | ob |
| 229 | 1 | 3 | -1.050000 | -0.981894487 | 1.680900680  | 1.033631378  | 1 | 0 | 0 | # | ob |
| 230 | 1 | 3 | -1.050000 | -5.023189092 | 6.314939700  | 3.233079711  | 1 | 0 | 0 | # | ob |
| 231 | 1 | 3 | -1.050000 | -1.607035345 | 6.132051481  | -1.033422068 | 1 | 0 | 0 | # | ob |
| 232 | 1 | 3 | -1.050000 | -2.741532736 | 1.850546126  | -3.231846262 | 1 | 0 | 0 | # | ob |
| 233 | 1 | 5 | 2.100000  | -0.953702986 | 1.527119204  | 2.662777170  | 1 | 0 | 0 | # | st |
| 234 | 1 | 5 | 2.100000  | -1.634672226 | 5.973370782  | -2.661798097 | 1 | 0 | 0 | # | st |
| 235 | 1 | 5 | 2.100000  | -4.222997014 | 7.381980796  | -2.662777170 | 1 | 0 | 0 | # | st |
| 236 | 1 | 5 | 2.100000  | -1.634647014 | 2.927430796  | -2.662777170 | 1 | 0 | 0 | # | st |
| 237 | 1 | 5 | 2.100000  | -0.953677774 | 7.390279218  | 2.661798097  | 1 | 0 | 0 | # | st |
| 238 | 1 | 5 | 2.100000  | -3.542027774 | 2.935729218  | 2.661798097  | 1 | 0 | 0 | # | st |
| 239 | 1 | 5 | 2.100000  | -3.542052986 | 5.981669204  | 2.662777170  | 1 | 0 | 0 | # | st |
| 240 | 1 | 5 | 2.100000  | -4.223022226 | 1.518820782  | -2.661798097 | 1 | 0 | 0 | # | st |
| 241 | 1 | 1 | 1.575000  | 2.588555029  | 10.383761568 | 0.000270632  | 0 | 0 | 0 | # | ao |
| 242 | 1 | 1 | 1.575000  | 0.000205029  | 14.838311568 | 0.000270632  | 0 | 0 | 0 | # | ao |
| 243 | 1 | 1 | 1.575000  | 2.588144971  | 16.343538432 | -0.000270632 | 0 | 0 | 0 | # | ao |
| 244 | 1 | 1 | 1.575000  | 5.176494971  | 11.888988432 | -0.000270632 | 0 | 0 | 0 | # | ao |
| 245 | 1 | 2 | 0.425000  | 3.734650872  | 13.366367322 | 1.486115063  | 0 | 0 | 0 | # | ho |
| 246 | 1 | 2 | 0.425000  | 1.146300872  | 8.911817322  | 1.486115063  | 0 | 0 | 0 | # | ho |
| 247 | 1 | 2 | 0.425000  | 1.442049128  | 13.360932678 | -1.486115063 | 0 | 0 | 0 | # | ho |
| 248 | 1 | 2 | 0.425000  | 4.030399128  | 17.815482678 | -1.486115063 | 0 | 0 | 0 | # | ho |
| 249 | 1 | 3 | -1.050000 | 0.981314655  | 10.586601481 | -1.033422068 | 0 | 0 | 0 | # | ob |
| 250 | 1 | 3 | -1.050000 | 5.023517264  | 15.214196126 | -3.231846262 | 0 | 0 | 0 | # | ob |
| 251 | 1 | 3 | -1.050000 | 3.570244487  | 11.682749320 | -1.033631378 | 0 | 0 | 0 | # | ob |
| 252 | 1 | 3 | -1.050000 | 2.434839092  | 15.957810300 | -3.233079711 | 0 | 0 | 0 | # | ob |
| 253 | 1 | 3 | -1.050000 | 0.981894487  | 16.137299320 | -1.033631378 | 0 | 0 | 0 | # | ob |
| 254 | 1 | 3 | -1.050000 | 1.606455513  | 15.044550680 | 1.033631378  | 0 | 0 | 0 | # | ob |
| 255 | 1 | 3 | -1.050000 | 5.023189092  | 11.503260300 | -3.233079711 | 0 | 0 | 0 | # | ob |
| 256 | 1 | 3 | -1.050000 | 1.607035345  | 11.686148519 | 1.033422068  | 0 | 0 | 0 | # | ob |
| 257 | 1 | 3 | -1.050000 | 2.741532736  | 15.967653874 | 3.231846262  | 0 | 0 | 0 | # | ob |
| 258 | 1 | 3 | -1.050000 | 4.195385345  | 16.140698519 | 1.033422068  | 0 | 0 | 0 | # | ob |
| 259 | 1 | 3 | -1.050000 | 0.153182736  | 11.513103874 | 3.231846262  | 0 | 0 | 0 | # | ob |
| 260 | 1 | 3 | -1.050000 | 2.741860908  | 10.769489700 | 3.233079711  | 0 | 0 | 0 | # | ob |
| 261 | 1 | 4 | -0.950000 | 1.999257657  | 8.910040996  | 1.012582885  | 0 | 0 | 0 | # | oh |
| 262 | 1 | 3 | -1.050000 | 4.667081651  | 8.913076970  | 3.061482417  | 0 | 0 | 0 | # | ob |
| 263 | 1 | 4 | -0.950000 | 4.587607657  | 13.364590996 | 1.012582885  | 0 | 0 | 0 | # | oh |
| 264 | 1 | 3 | -1.050000 | 2.078731651  | 13.367626970 | 3.061482417  | 0 | 0 | 0 | # | ob |
| 265 | 1 | 4 | -0.950000 | 3.177442343  | 17.817259004 | -1.012582885 | 0 | 0 | 0 | # | oh |
| 266 | 1 | 3 | -1.050000 | 0.509618349  | 17.814223030 | -3.061482417 | 0 | 0 | 0 | # | ob |
| 267 | 1 | 4 | -0.950000 | 0.589092343  | 13.362709004 | -1.012582885 | 0 | 0 | 0 | # | oh |
| 268 | 1 | 3 | -1.050000 | 3.097968349  | 13.359673030 | -3.061482417 | 0 | 0 | 0 | # | ob |
| 269 | 1 | 3 | -1.050000 | 4.194805513  | 10.590000680 | 1.033631378  | 0 | 0 | 0 | # | ob |
| 270 | 1 | 3 | -1.050000 | 0.153510908  | 15.224039700 | 3.233079711  | 0 | 0 | 0 | # | ob |
| 271 | 1 | 3 | -1.050000 | 3.569664655  | 15.041151481 | -1.033422068 | 0 | 0 | 0 | # | ob |
| 272 | 1 | 3 | -1.050000 | 2.435167264  | 10.759646126 | -3.231846262 | 0 | 0 | 0 | # | ob |
| 273 | 1 | 5 | 2.100000  | 4.222997014  | 10.436219204 | 2.662777170  | 0 | 0 | 0 | # | st |
| 274 | 1 | 5 | 2.100000  | 3.542027774  | 14.882470782 | -2.661798097 | 0 | 0 | 0 | # | st |
| 275 | 1 | 5 | 2.100000  | 0.953702986  | 16.291080796 | -2.662777170 | 0 | 0 | 0 | # | st |
| 276 | 1 | 5 | 2.100000  | 3.542052986  | 11.836530796 | -2.662777170 | 0 | 0 | 0 | # | st |
| 277 | 1 | 5 | 2.100000  | 4.223022226  | 16.299379218 | 2.661798097  | 0 | 0 | 0 | # | st |
| 278 | 1 | 5 | 2.100000  | 1.634672226  | 11.844829218 | 2.661798097  | 0 | 0 | 0 | # | st |
| 279 | 1 | 5 | 2.100000  | 1.634647014  | 14.890769204 | 2.662777170  | 0 | 0 | 0 | # | st |
| 280 | 1 | 5 | 2.100000  | 0.953677774  | 10.427920782 | -2.661798097 | 0 | 0 | 0 | # | st |
| 281 | 1 | 1 | 1.575000  | 7.765255029  | 10.383761568 | 0.000270632  | 0 | 0 | 0 | # | ao |
| 282 | 1 | 1 | 1.575000  | 5.176905029  | 14.838311568 | 0.000270632  | 0 | 0 | 0 | # | ao |
| 283 | 1 | 1 | 1.575000  | 7.764844971  | 16.343538432 | -0.000270632 | 0 | 0 | 0 | # | ao |
| 284 | 1 | 1 | 1.575000  | 10.353194971 | 11.888988432 | -0.000270632 | 0 | 0 | 0 | # | ao |
| 285 | 1 | 2 | 0.425000  | 8.911350872  | 13.366367322 | 1.486115063  | 0 | 0 | 0 | # | ho |
| 286 | 1 | 2 | 0.425000  | 6.323000872  | 8.911817322  | 1.486115063  | 0 | 0 | 0 | # | ho |
| 287 | 1 | 2 | 0.425000  | 6.618749128  | 13.360932678 | -1.486115063 | 0 | 0 | 0 | # | ho |
| 288 | 1 | 2 | 0.425000  | 9.207099128  | 17.815482678 | -1.486115063 | 0 | 0 | 0 | # | ho |
| 289 | 1 | 3 | -1.050000 | 6.158014655  | 10.586601481 | -1.033422068 | 0 | 0 | 0 | # | ob |
| 290 | 1 | 3 | -1.050000 | 10.200217264 | 15.214196126 | -3.231846262 | 0 | 0 | 0 | # | ob |
| 291 | 1 | 3 | -1.050000 | 8.746944487  | 11.682749320 | -1.033631378 | 0 | 0 | 0 | # | ob |
| 292 | 1 | 3 | -1.050000 | 7.611539092  | 15.957810300 | -3.233079711 | 0 | 0 | 0 | # | ob |
| 293 | 1 | 3 | -1.050000 | 6.158594487  | 16.137299320 | -1.033631378 | 0 | 0 | 0 | # | ob |
| 294 | 1 | 3 | -1.050000 | 6.783155513  | 15.044550680 | 1.033631378  | 0 | 0 | 0 | # | ob |
| 295 | 1 | 3 | -1.050000 | 10.199889092 | 11.503260300 | -3.233079711 | 0 | 0 | 0 | # | ob |
| 296 | 1 | 3 | -1.050000 | 6.783735345  | 11.686148519 | 1.033422068  | 0 | 0 | 0 | # | ob |
| 297 | 1 | 3 | -1.050000 | 7.918232736  | 15.967653874 | 3.231846262  | 0 | 0 | 0 | # | ob |
| 298 | 1 | 3 | -1.050000 | 9.372085345  | 16.140698519 | 1.033422068  | 0 | 0 | 0 | # | ob |
| 299 | 1 | 3 | -1.050000 | 5.329882736  | 11.513103874 | 3.231846262  | 0 | 0 | 0 | # | ob |
| 300 | 1 | 3 | -1.050000 | 7.918560908  | 10.769489700 | 3.233079711  | 0 | 0 | 0 | # | ob |
| 301 | 1 | 4 | -0.950000 | 7.175957657  | 8.910040996  | 1.012582885  | 0 | 0 | 0 | # | oh |
| 302 | 1 | 3 | -1.050000 | 9.843781651  | 8.913076970  | 3.061482417  | 0 | 0 | 0 | # | ob |
| 303 | 1 | 4 | -0.950000 | 9.764307657  | 13.364590996 | 1.012582885  | 0 | 0 | 0 | # | oh |
| 304 | 1 | 3 | -1.050000 | 7.255431651  | 13.367626970 | 3.061482417  | 0 | 0 | 0 | # | ob |
| 305 | 1 | 4 | -0.950000 | 8.354142343  | 17.817259004 | -1.012582885 | 0 | 0 | 0 | # | oh |
| 306 | 1 | 3 | -1.050000 | 5.686318349  | 17.814223030 | -3.061482417 | 0 | 0 | 0 | # | ob |

|     |   |   |           |               |              |              |   |   |   |    |
|-----|---|---|-----------|---------------|--------------|--------------|---|---|---|----|
| 307 | 1 | 4 | -0.950000 | 5.765792343   | 13.362709004 | -1.012582885 | 0 | 0 | 0 | oh |
| 308 | 1 | 3 | -1.050000 | 8.274668349   | 13.359673030 | -3.061482417 | 0 | 0 | 0 | ob |
| 309 | 1 | 3 | -1.050000 | 9.371505513   | 10.590000680 | 1.033631378  | 0 | 0 | 0 | ob |
| 310 | 1 | 3 | -1.050000 | 5.330210908   | 15.224039700 | 3.233079711  | 0 | 0 | 0 | ob |
| 311 | 1 | 3 | -1.050000 | 8.746364655   | 15.041151481 | -1.033422068 | 0 | 0 | 0 | ob |
| 312 | 1 | 3 | -1.050000 | 7.611867264   | 10.759646126 | -3.231846262 | 0 | 0 | 0 | ob |
| 313 | 1 | 5 | 2.100000  | 9.399697014   | 10.436219204 | 2.662777170  | 0 | 0 | 0 | st |
| 314 | 1 | 5 | 2.100000  | 8.718727774   | 14.882470782 | -2.661798097 | 0 | 0 | 0 | st |
| 315 | 1 | 5 | 2.100000  | 6.130402986   | 16.291080796 | -2.662777170 | 0 | 0 | 0 | st |
| 316 | 1 | 5 | 2.100000  | 8.718752986   | 11.836530796 | -2.662777170 | 0 | 0 | 0 | st |
| 317 | 1 | 5 | 2.100000  | 9.399722226   | 16.299379218 | 2.661798097  | 0 | 0 | 0 | st |
| 318 | 1 | 5 | 2.100000  | 6.811372226   | 11.844829218 | 2.661798097  | 0 | 0 | 0 | st |
| 319 | 1 | 5 | 2.100000  | 6.811347014   | 14.890769204 | 2.662777170  | 0 | 0 | 0 | st |
| 320 | 1 | 5 | 2.100000  | 6.130377774   | 10.427920782 | -2.661798097 | 0 | 0 | 0 | st |
| 321 | 1 | 1 | 1.575000  | 12.941955029  | 10.383761568 | 0.000270632  | 0 | 0 | 0 | ao |
| 322 | 1 | 1 | 1.575000  | 10.353605029  | 14.838311568 | 0.000270632  | 0 | 0 | 0 | ao |
| 323 | 1 | 1 | 1.575000  | 12.941544971  | 16.343538432 | -0.000270632 | 0 | 0 | 0 | ao |
| 324 | 1 | 1 | 1.575000  | 15.529894971  | 11.888988432 | -0.000270632 | 0 | 0 | 0 | ao |
| 325 | 1 | 2 | 0.425000  | 14.088050872  | 13.366367322 | 1.486115063  | 0 | 0 | 0 | ho |
| 326 | 1 | 2 | 0.425000  | 11.499700872  | 8.911817322  | 1.486115063  | 0 | 0 | 0 | ho |
| 327 | 1 | 2 | 0.425000  | 11.795449128  | 13.360932678 | -1.486115063 | 0 | 0 | 0 | ho |
| 328 | 1 | 2 | 0.425000  | 14.383799128  | 17.815482678 | -1.486115063 | 0 | 0 | 0 | ho |
| 329 | 1 | 3 | -1.050000 | 11.334714655  | 10.586601481 | -1.033422068 | 0 | 0 | 0 | ob |
| 330 | 1 | 3 | -1.050000 | 15.376917264  | 15.214196126 | -3.231846262 | 0 | 0 | 0 | ob |
| 331 | 1 | 3 | -1.050000 | 13.923644487  | 11.682749320 | -1.033631378 | 0 | 0 | 0 | ob |
| 332 | 1 | 3 | -1.050000 | 12.788239092  | 15.957810300 | -3.233079711 | 0 | 0 | 0 | ob |
| 333 | 1 | 3 | -1.050000 | 11.335294487  | 16.137299320 | -1.033631378 | 0 | 0 | 0 | ob |
| 334 | 1 | 3 | -1.050000 | 11.959855513  | 15.044550680 | 1.033631378  | 0 | 0 | 0 | ob |
| 335 | 1 | 3 | -1.050000 | 15.376589092  | 11.503260300 | -3.233079711 | 0 | 0 | 0 | ob |
| 336 | 1 | 3 | -1.050000 | 11.960435345  | 11.686148519 | 1.033422068  | 0 | 0 | 0 | ob |
| 337 | 1 | 3 | -1.050000 | 13.094932736  | 15.967653874 | 3.231846262  | 0 | 0 | 0 | ob |
| 338 | 1 | 3 | -1.050000 | 14.548785345  | 16.140698519 | 1.033422068  | 0 | 0 | 0 | ob |
| 339 | 1 | 3 | -1.050000 | 10.506582736  | 11.513103874 | 3.231846262  | 0 | 0 | 0 | ob |
| 340 | 1 | 3 | -1.050000 | 13.095260908  | 10.769489700 | 3.233079711  | 0 | 0 | 0 | ob |
| 341 | 1 | 4 | -0.950000 | 12.352657657  | 8.910040996  | 1.012582885  | 0 | 0 | 0 | oh |
| 342 | 1 | 3 | -1.050000 | 15.020481651  | 8.913076970  | 3.061482417  | 0 | 0 | 0 | ob |
| 343 | 1 | 4 | -0.950000 | 14.941007657  | 13.364590996 | 1.012582885  | 0 | 0 | 0 | oh |
| 344 | 1 | 3 | -1.050000 | 12.432131651  | 13.367626970 | 3.061482417  | 0 | 0 | 0 | ob |
| 345 | 1 | 4 | -0.950000 | 13.530842343  | 17.817259004 | -1.012582885 | 0 | 0 | 0 | oh |
| 346 | 1 | 3 | -1.050000 | 10.863018349  | 17.814223030 | -3.061482417 | 0 | 0 | 0 | ob |
| 347 | 1 | 4 | -0.950000 | 10.942492343  | 13.362709004 | -1.012582885 | 0 | 0 | 0 | oh |
| 348 | 1 | 3 | -1.050000 | 13.451368349  | 13.359673030 | -3.061482417 | 0 | 0 | 0 | ob |
| 349 | 1 | 3 | -1.050000 | 14.548205513  | 10.590000680 | 1.033631378  | 0 | 0 | 0 | ob |
| 350 | 1 | 3 | -1.050000 | 10.506910908  | 15.224039700 | 3.233079711  | 0 | 0 | 0 | ob |
| 351 | 1 | 3 | -1.050000 | 13.923064655  | 15.041151481 | -1.033422068 | 0 | 0 | 0 | ob |
| 352 | 1 | 3 | -1.050000 | 12.788567264  | 10.759646126 | -3.231846262 | 0 | 0 | 0 | ob |
| 353 | 1 | 5 | 2.100000  | 14.576397014  | 10.436219204 | 2.662777170  | 0 | 0 | 0 | st |
| 354 | 1 | 5 | 2.100000  | 13.895427774  | 14.882470782 | -2.661798097 | 0 | 0 | 0 | st |
| 355 | 1 | 5 | 2.100000  | 11.307102986  | 16.291080796 | -2.662777170 | 0 | 0 | 0 | st |
| 356 | 1 | 5 | 2.100000  | 13.895452986  | 11.836530796 | -2.662777170 | 0 | 0 | 0 | st |
| 357 | 1 | 5 | 2.100000  | 14.576422226  | 16.299379218 | 2.661798097  | 0 | 0 | 0 | st |
| 358 | 1 | 5 | 2.100000  | 11.988072226  | 11.844829218 | 2.661798097  | 0 | 0 | 0 | st |
| 359 | 1 | 5 | 2.100000  | 11.988047014  | 14.890769204 | 2.662777170  | 0 | 0 | 0 | st |
| 360 | 1 | 5 | 2.100000  | 11.307077774  | 10.427920782 | -2.661798097 | 0 | 0 | 0 | st |
| 361 | 1 | 1 | 1.575000  | -12.941544971 | 10.383761568 | 0.000270632  | 1 | 0 | 0 | ao |
| 362 | 1 | 1 | 1.575000  | -15.529894971 | 14.838311568 | 0.000270632  | 1 | 0 | 0 | ao |
| 363 | 1 | 1 | 1.575000  | -12.941955029 | 16.343538432 | -0.000270632 | 1 | 0 | 0 | ao |
| 364 | 1 | 1 | 1.575000  | -10.353605029 | 11.888988432 | -0.000270632 | 1 | 0 | 0 | ao |
| 365 | 1 | 2 | 0.425000  | -11.795449128 | 13.366367322 | 1.486115063  | 1 | 0 | 0 | ho |
| 366 | 1 | 2 | 0.425000  | -14.383799128 | 8.911817322  | 1.486115063  | 1 | 0 | 0 | ho |
| 367 | 1 | 2 | 0.425000  | -14.088050872 | 13.360932678 | -1.486115063 | 1 | 0 | 0 | ho |
| 368 | 1 | 2 | 0.425000  | -11.499700872 | 17.815482678 | -1.486115063 | 1 | 0 | 0 | ho |
| 369 | 1 | 3 | -1.050000 | -14.548785345 | 10.586601481 | -1.033422068 | 1 | 0 | 0 | ob |
| 370 | 1 | 3 | -1.050000 | -10.506582736 | 15.214196126 | -3.231846262 | 1 | 0 | 0 | ob |
| 371 | 1 | 3 | -1.050000 | -11.959855513 | 11.682749320 | -1.033631378 | 1 | 0 | 0 | ob |
| 372 | 1 | 3 | -1.050000 | -13.095260908 | 15.957810300 | -3.233079711 | 1 | 0 | 0 | ob |
| 373 | 1 | 3 | -1.050000 | -14.548205513 | 16.137299320 | -1.033631378 | 1 | 0 | 0 | ob |
| 374 | 1 | 3 | -1.050000 | -13.923644487 | 15.044550680 | 1.033631378  | 1 | 0 | 0 | ob |
| 375 | 1 | 3 | -1.050000 | -10.506910908 | 11.503260300 | -3.233079711 | 1 | 0 | 0 | ob |
| 376 | 1 | 3 | -1.050000 | -13.923064655 | 11.686148519 | 1.033422068  | 1 | 0 | 0 | ob |
| 377 | 1 | 3 | -1.050000 | -12.788567264 | 15.967653874 | 3.231846262  | 1 | 0 | 0 | ob |
| 378 | 1 | 3 | -1.050000 | -11.334714655 | 16.140698519 | 1.033422068  | 1 | 0 | 0 | ob |
| 379 | 1 | 3 | -1.050000 | -15.376917264 | 11.513103874 | 3.231846262  | 1 | 0 | 0 | ob |
| 380 | 1 | 3 | -1.050000 | -12.788239092 | 10.769489700 | 3.233079711  | 1 | 0 | 0 | ob |
| 381 | 1 | 4 | -0.950000 | -13.530842343 | 8.910040996  | 1.012582885  | 1 | 0 | 0 | oh |
| 382 | 1 | 3 | -1.050000 | -10.863018349 | 8.913076970  | 3.061482417  | 1 | 0 | 0 | ob |
| 383 | 1 | 4 | -0.950000 | -10.942492343 | 13.364590996 | 1.012582885  | 1 | 0 | 0 | oh |
| 384 | 1 | 3 | -1.050000 | -13.451368349 | 13.367626970 | 3.061482417  | 1 | 0 | 0 | ob |
| 385 | 1 | 4 | -0.950000 | -12.352657657 | 17.817259004 | -1.012582885 | 1 | 0 | 0 | oh |
| 386 | 1 | 3 | -1.050000 | -15.020481651 | 17.814223030 | -3.061482417 | 1 | 0 | 0 | ob |
| 387 | 1 | 4 | -0.950000 | -14.941007657 | 13.362709004 | -1.012582885 | 1 | 0 | 0 | oh |
| 388 | 1 | 3 | -1.050000 | -12.432131651 | 13.359673030 | -3.061482417 | 1 | 0 | 0 | ob |
| 389 | 1 | 3 | -1.050000 | -11.335294487 | 10.590000680 | 1.033631378  | 1 | 0 | 0 | ob |
| 390 | 1 | 3 | -1.050000 | -15.376589092 | 15.224039700 | 3.233079711  | 1 | 0 | 0 | ob |
| 391 | 1 | 3 | -1.050000 | -11.960435345 | 15.041151481 | -1.033422068 | 1 | 0 | 0 | ob |
| 392 | 1 | 3 | -1.050000 | -13.094932736 | 10.759646126 | -3.231846262 | 1 | 0 | 0 | ob |
| 393 | 1 | 5 | 2.100000  | -11.307102986 | 10.436219204 | 2.662777170  | 1 | 0 | 0 | st |
| 394 | 1 | 5 | 2.100000  | -11.988072226 | 14.882470782 | -2.661798097 | 1 | 0 | 0 | st |
| 395 | 1 | 5 | 2.100000  | -14.576397014 | 16.291080796 | -2.662777170 | 1 | 0 | 0 | st |
| 396 | 1 | 5 | 2.100000  | -11.988047014 | 11.836530796 | -2.662777170 | 1 | 0 | 0 | st |
| 397 | 1 | 5 | 2.100000  | -11.307077774 | 16.299379218 | 2.661798097  | 1 | 0 | 0 | st |
| 398 | 1 | 5 | 2.100000  | -13.895427774 | 11.844829218 | 2.661798097  | 1 | 0 | 0 | st |
| 399 | 1 | 5 | 2.100000  | -13.895452986 | 14.890769204 | 2.662777170  | 1 | 0 | 0 | st |

|     |   |   |           |               |               |              |   |   |   |   |    |
|-----|---|---|-----------|---------------|---------------|--------------|---|---|---|---|----|
| 400 | 1 | 5 | 2.100000  | -14.576422226 | 10.427920782  | -2.661798097 | 1 | 0 | 0 | # | st |
| 401 | 1 | 1 | 1.575000  | -7.764844971  | 10.383761568  | 0.000270632  | 1 | 0 | 0 | # | ao |
| 402 | 1 | 1 | 1.575000  | -10.353194971 | 14.838311568  | 0.000270632  | 1 | 0 | 0 | # | ao |
| 403 | 1 | 1 | 1.575000  | -7.765255029  | 16.343538432  | -0.000270632 | 1 | 0 | 0 | # | ao |
| 404 | 1 | 1 | 1.575000  | -5.176905029  | 11.888988432  | -0.000270632 | 1 | 0 | 0 | # | ao |
| 405 | 1 | 2 | 0.425000  | -6.618749128  | 13.366367322  | 1.486115063  | 1 | 0 | 0 | # | ho |
| 406 | 1 | 2 | 0.425000  | -9.207099128  | 8.911817322   | 1.486115063  | 1 | 0 | 0 | # | ho |
| 407 | 1 | 2 | 0.425000  | -8.911350872  | 13.360932678  | -1.486115063 | 1 | 0 | 0 | # | ho |
| 408 | 1 | 2 | 0.425000  | -6.323000872  | 17.815482678  | -1.486115063 | 1 | 0 | 0 | # | ho |
| 409 | 1 | 3 | -1.050000 | -9.372085345  | 10.586601481  | -1.033422068 | 1 | 0 | 0 | # | ob |
| 410 | 1 | 3 | -1.050000 | -5.329882736  | 15.214196126  | -3.231846262 | 1 | 0 | 0 | # | ob |
| 411 | 1 | 3 | -1.050000 | -6.783155513  | 11.682749320  | -1.033631378 | 1 | 0 | 0 | # | ob |
| 412 | 1 | 3 | -1.050000 | -7.918569088  | 15.957810300  | -3.233079711 | 1 | 0 | 0 | # | ob |
| 413 | 1 | 3 | -1.050000 | -9.371505513  | 16.137299320  | -1.033631378 | 1 | 0 | 0 | # | ob |
| 414 | 1 | 3 | -1.050000 | -8.746944487  | 15.044550680  | 1.033631378  | 1 | 0 | 0 | # | ob |
| 415 | 1 | 3 | -1.050000 | -5.330210908  | 11.503260300  | -3.233079711 | 1 | 0 | 0 | # | ob |
| 416 | 1 | 3 | -1.050000 | -8.746364655  | 11.686148519  | 1.033422068  | 1 | 0 | 0 | # | ob |
| 417 | 1 | 3 | -1.050000 | -7.611867264  | 15.967653874  | 3.231846262  | 1 | 0 | 0 | # | ob |
| 418 | 1 | 3 | -1.050000 | -6.158014655  | 16.140698519  | 1.033422068  | 1 | 0 | 0 | # | ob |
| 419 | 1 | 3 | -1.050000 | -10.200217264 | 11.513103874  | 3.231846262  | 1 | 0 | 0 | # | ob |
| 420 | 1 | 3 | -1.050000 | -7.611539092  | 10.769489700  | 3.233079711  | 1 | 0 | 0 | # | ob |
| 421 | 1 | 4 | -0.950000 | -8.354142343  | 8.910040996   | 1.012582885  | 1 | 0 | 0 | # | oh |
| 422 | 1 | 3 | -1.050000 | -5.686318349  | 8.913076970   | 3.061482417  | 1 | 0 | 0 | # | ob |
| 423 | 1 | 4 | -0.950000 | -5.765792343  | 13.364590996  | 1.012582885  | 1 | 0 | 0 | # | oh |
| 424 | 1 | 3 | -1.050000 | -8.274668349  | 13.367626970  | 3.061482417  | 1 | 0 | 0 | # | ob |
| 425 | 1 | 4 | -0.950000 | -7.175957657  | 17.817259004  | -1.012582885 | 1 | 0 | 0 | # | oh |
| 426 | 1 | 3 | -1.050000 | -9.843781651  | 17.814223030  | -3.061482417 | 1 | 0 | 0 | # | ob |
| 427 | 1 | 4 | -0.950000 | -9.764307657  | 13.362709004  | -1.012582885 | 1 | 0 | 0 | # | oh |
| 428 | 1 | 3 | -1.050000 | -7.255431651  | 13.359673030  | -3.061482417 | 1 | 0 | 0 | # | ob |
| 429 | 1 | 3 | -1.050000 | -6.158594487  | 10.590000680  | 1.033631378  | 1 | 0 | 0 | # | ob |
| 430 | 1 | 3 | -1.050000 | -10.199889092 | 15.224039700  | 3.233079711  | 1 | 0 | 0 | # | ob |
| 431 | 1 | 3 | -1.050000 | -6.783735345  | 15.041151481  | -1.033422068 | 1 | 0 | 0 | # | ob |
| 432 | 1 | 3 | -1.050000 | -7.918232736  | 10.759646126  | -3.231846262 | 1 | 0 | 0 | # | ob |
| 433 | 1 | 5 | 2.100000  | -6.130402986  | 10.436219204  | 2.662777170  | 1 | 0 | 0 | # | st |
| 434 | 1 | 5 | 2.100000  | -6.811372226  | 14.882470782  | -2.661798097 | 1 | 0 | 0 | # | st |
| 435 | 1 | 5 | 2.100000  | -9.399697014  | 16.291080796  | -2.662777170 | 1 | 0 | 0 | # | st |
| 436 | 1 | 5 | 2.100000  | -6.811347014  | 11.836530796  | -2.662777170 | 1 | 0 | 0 | # | st |
| 437 | 1 | 5 | 2.100000  | -6.130377774  | 16.299379218  | 2.661798097  | 1 | 0 | 0 | # | st |
| 438 | 1 | 5 | 2.100000  | -8.718727774  | 11.844829218  | 2.661798097  | 1 | 0 | 0 | # | st |
| 439 | 1 | 5 | 2.100000  | -8.718752986  | 14.890769204  | 2.662777170  | 1 | 0 | 0 | # | st |
| 440 | 1 | 5 | 2.100000  | -9.399722226  | 10.427920782  | -2.661798097 | 1 | 0 | 0 | # | st |
| 441 | 1 | 1 | 1.575000  | -2.588144971  | 10.383761568  | 0.000270632  | 1 | 0 | 0 | # | ao |
| 442 | 1 | 1 | 1.575000  | -5.176494971  | 14.838311568  | 0.000270632  | 1 | 0 | 0 | # | ao |
| 443 | 1 | 1 | 1.575000  | -2.588555029  | 16.343538432  | -0.000270632 | 1 | 0 | 0 | # | ao |
| 444 | 1 | 1 | 1.575000  | -0.000205029  | 11.888988432  | -0.000270632 | 1 | 0 | 0 | # | ao |
| 445 | 1 | 2 | 0.425000  | -1.442049128  | 13.366367322  | 1.486115063  | 1 | 0 | 0 | # | ho |
| 446 | 1 | 2 | 0.425000  | -4.030399128  | 8.911817322   | 1.486115063  | 1 | 0 | 0 | # | ho |
| 447 | 1 | 2 | 0.425000  | -3.734650872  | 13.360932678  | -1.486115063 | 1 | 0 | 0 | # | ho |
| 448 | 1 | 2 | 0.425000  | -1.146300872  | 17.815482678  | -1.486115063 | 1 | 0 | 0 | # | ho |
| 449 | 1 | 3 | -1.050000 | -4.195385345  | 10.586601481  | -1.033422068 | 1 | 0 | 0 | # | ob |
| 450 | 1 | 3 | -1.050000 | -0.153182736  | 15.214196126  | -3.231846262 | 1 | 0 | 0 | # | ob |
| 451 | 1 | 3 | -1.050000 | -1.606455513  | 11.682749320  | -1.033631378 | 1 | 0 | 0 | # | ob |
| 452 | 1 | 3 | -1.050000 | -2.741860908  | 15.957810300  | -3.233079711 | 1 | 0 | 0 | # | ob |
| 453 | 1 | 3 | -1.050000 | -4.194805513  | 16.137299320  | -1.033631378 | 1 | 0 | 0 | # | ob |
| 454 | 1 | 3 | -1.050000 | -3.570244487  | 15.044550680  | 1.033631378  | 1 | 0 | 0 | # | ob |
| 455 | 1 | 3 | -1.050000 | -0.153510908  | 11.503260300  | -3.233079711 | 1 | 0 | 0 | # | ob |
| 456 | 1 | 3 | -1.050000 | -3.569664655  | 11.686148519  | 1.033422068  | 1 | 0 | 0 | # | ob |
| 457 | 1 | 3 | -1.050000 | -2.435167264  | 15.967653874  | 3.231846262  | 1 | 0 | 0 | # | ob |
| 458 | 1 | 3 | -1.050000 | -0.981314655  | 16.140698519  | 1.033422068  | 1 | 0 | 0 | # | ob |
| 459 | 1 | 3 | -1.050000 | -5.023517264  | 11.513103874  | 3.231846262  | 1 | 0 | 0 | # | ob |
| 460 | 1 | 3 | -1.050000 | -2.434839092  | 10.769489700  | 3.233079711  | 1 | 0 | 0 | # | ob |
| 461 | 1 | 4 | -0.950000 | -3.177442343  | 8.910040996   | 1.012582885  | 1 | 0 | 0 | # | oh |
| 462 | 1 | 3 | -1.050000 | -0.509618349  | 8.913076970   | 3.061482417  | 1 | 0 | 0 | # | ob |
| 463 | 1 | 4 | -0.950000 | -0.589092343  | 13.364590996  | 1.012582885  | 1 | 0 | 0 | # | oh |
| 464 | 1 | 3 | -1.050000 | -3.097968349  | 13.367626970  | 3.061482417  | 1 | 0 | 0 | # | ob |
| 465 | 1 | 4 | -0.950000 | -1.999257657  | 17.817259004  | -1.012582885 | 1 | 0 | 0 | # | oh |
| 466 | 1 | 3 | -1.050000 | -4.667801651  | 17.814223030  | -3.061482417 | 1 | 0 | 0 | # | ob |
| 467 | 1 | 4 | -0.950000 | -4.587607657  | 13.362709004  | -1.012582885 | 1 | 0 | 0 | # | oh |
| 468 | 1 | 3 | -1.050000 | -2.078731651  | 13.359673030  | -3.061482417 | 1 | 0 | 0 | # | ob |
| 469 | 1 | 3 | -1.050000 | -0.981894487  | 10.590000680  | 1.033631378  | 1 | 0 | 0 | # | ob |
| 470 | 1 | 3 | -1.050000 | -5.023189092  | 15.224039700  | 3.233079711  | 1 | 0 | 0 | # | ob |
| 471 | 1 | 3 | -1.050000 | -1.607035345  | 15.041151481  | -1.033422068 | 1 | 0 | 0 | # | ob |
| 472 | 1 | 3 | -1.050000 | -2.741532736  | 10.759646126  | -3.231846262 | 1 | 0 | 0 | # | ob |
| 473 | 1 | 5 | 2.100000  | -0.953702986  | 10.436219204  | 2.662777170  | 1 | 0 | 0 | # | st |
| 474 | 1 | 5 | 2.100000  | -1.634672226  | 14.882470782  | -2.661798097 | 1 | 0 | 0 | # | st |
| 475 | 1 | 5 | 2.100000  | -4.222997014  | 16.291080796  | -2.662777170 | 1 | 0 | 0 | # | st |
| 476 | 1 | 5 | 2.100000  | -1.634647014  | 11.836530796  | -2.662777170 | 1 | 0 | 0 | # | st |
| 477 | 1 | 5 | 2.100000  | -0.953677774  | 16.299379218  | 2.661798097  | 1 | 0 | 0 | # | st |
| 478 | 1 | 5 | 2.100000  | -3.542027774  | 11.844829218  | 2.661798097  | 1 | 0 | 0 | # | st |
| 479 | 1 | 5 | 2.100000  | -3.542052986  | 14.890769204  | 2.662777170  | 1 | 0 | 0 | # | st |
| 480 | 1 | 5 | 2.100000  | -4.223022226  | 10.427920782  | -2.661798097 | 1 | 0 | 0 | # | st |
| 481 | 1 | 1 | 1.575000  | 2.588555029   | -16.343538432 | 0.000270632  | 0 | 1 | 0 | # | ao |
| 482 | 1 | 1 | 1.575000  | 0.000205029   | -11.888988432 | 0.000270632  | 0 | 1 | 0 | # | ao |
| 483 | 1 | 1 | 1.575000  | 2.588144971   | -10.383761568 | -0.000270632 | 0 | 1 | 0 | # | ao |
| 484 | 1 | 1 | 1.575000  | 5.176494971   | -14.838311568 | -0.000270632 | 0 | 1 | 0 | # | ao |
| 485 | 1 | 2 | 0.425000  | 3.734650872   | -13.360932678 | 1.486115063  | 0 | 1 | 0 | # | ho |
| 486 | 1 | 2 | 0.425000  | 1.146300872   | -17.815482678 | 1.486115063  | 0 | 1 | 0 | # | ho |
| 487 | 1 | 2 | 0.425000  | 1.442049128   | -13.366367322 | -1.486115063 | 0 | 1 | 0 | # | ho |
| 488 | 1 | 2 | 0.425000  | 4.030399128   | -8.911817322  | -1.486115063 | 0 | 1 | 0 | # | ho |
| 489 | 1 | 3 | -1.050000 | 0.981314655   | -16.140698519 | -1.033422068 | 0 | 1 | 0 | # | ob |
| 490 | 1 | 3 | -1.050000 | 5.023517264   | -11.513103874 | -3.231846262 | 0 | 1 | 0 | # | ob |
| 491 | 1 | 3 | -1.050000 | 3.570244487   | -15.044550680 | -1.033631378 | 0 | 1 | 0 | # | ob |
| 492 | 1 | 3 | -1.050000 | 2.434839092   | -10.769489700 | -3.233079711 | 0 | 1 | 0 | # | ob |

|     |   |   |           |              |               |              |   |   |   |   |    |
|-----|---|---|-----------|--------------|---------------|--------------|---|---|---|---|----|
| 493 | 1 | 3 | -1.050000 | 0.981894487  | -10.590000680 | -1.033631378 | 0 | 1 | 0 | # | ob |
| 494 | 1 | 3 | -1.050000 | 1.606455513  | -11.682749320 | 1.033631378  | 0 | 1 | 0 | # | ob |
| 495 | 1 | 3 | -1.050000 | 5.023189092  | -15.224039700 | -3.233079711 | 0 | 1 | 0 | # | ob |
| 496 | 1 | 3 | -1.050000 | 1.607035345  | -15.041151481 | 1.033422068  | 0 | 1 | 0 | # | ob |
| 497 | 1 | 3 | -1.050000 | 2.741532736  | -10.759646126 | 3.231846262  | 0 | 1 | 0 | # | ob |
| 498 | 1 | 3 | -1.050000 | 4.195385345  | -10.586601481 | 1.033422068  | 0 | 1 | 0 | # | ob |
| 499 | 1 | 3 | -1.050000 | 0.153182736  | -15.214196126 | 3.231846262  | 0 | 1 | 0 | # | ob |
| 500 | 1 | 3 | -1.050000 | 2.741860908  | -15.957810300 | 3.233079711  | 0 | 1 | 0 | # | ob |
| 501 | 1 | 4 | -0.950000 | 1.999257657  | -17.817259004 | 1.012582885  | 0 | 1 | 0 | # | oh |
| 502 | 1 | 3 | -1.050000 | 4.667081651  | -17.814223030 | 3.061482417  | 0 | 1 | 0 | # | ob |
| 503 | 1 | 4 | -0.950000 | 4.587607657  | -13.362709004 | 1.012582885  | 0 | 1 | 0 | # | oh |
| 504 | 1 | 3 | -1.050000 | 2.078731651  | -13.359673030 | 3.061482417  | 0 | 1 | 0 | # | ob |
| 505 | 1 | 4 | -0.950000 | 3.177442343  | -8.910040996  | -1.012582885 | 0 | 1 | 0 | # | oh |
| 506 | 1 | 3 | -1.050000 | 0.509618349  | -8.913076970  | -3.061482417 | 0 | 1 | 0 | # | ob |
| 507 | 1 | 4 | -0.950000 | 0.589092343  | -13.364590996 | -1.012582885 | 0 | 1 | 0 | # | oh |
| 508 | 1 | 3 | -1.050000 | 3.097968349  | -13.367626970 | -3.061482417 | 0 | 1 | 0 | # | ob |
| 509 | 1 | 3 | -1.050000 | 4.194805513  | -16.137299320 | 1.033631378  | 0 | 1 | 0 | # | ob |
| 510 | 1 | 3 | -1.050000 | 0.153510908  | -11.503260300 | 3.233079711  | 0 | 1 | 0 | # | ob |
| 511 | 1 | 3 | -1.050000 | 3.569664655  | -11.686148519 | -1.033422068 | 0 | 1 | 0 | # | ob |
| 512 | 1 | 3 | -1.050000 | 2.435167264  | -15.967653874 | -3.231846262 | 0 | 1 | 0 | # | ob |
| 513 | 1 | 5 | 2.100000  | 4.222997014  | -16.291080796 | 2.662777170  | 0 | 1 | 0 | # | st |
| 514 | 1 | 5 | 2.100000  | 3.542027774  | -11.844829218 | -2.661798097 | 0 | 1 | 0 | # | st |
| 515 | 1 | 5 | 2.100000  | 0.953702986  | -10.436219204 | -2.662777170 | 0 | 1 | 0 | # | st |
| 516 | 1 | 5 | 2.100000  | 3.542052986  | -14.890769204 | -2.662777170 | 0 | 1 | 0 | # | st |
| 517 | 1 | 5 | 2.100000  | 4.223022226  | -10.427920782 | 2.661798097  | 0 | 1 | 0 | # | st |
| 518 | 1 | 5 | 2.100000  | 1.634672226  | -14.882470782 | 2.661798097  | 0 | 1 | 0 | # | st |
| 519 | 1 | 5 | 2.100000  | 1.634647014  | -11.836530796 | 2.662777170  | 0 | 1 | 0 | # | st |
| 520 | 1 | 5 | 2.100000  | 0.953677774  | -16.299379218 | -2.661798097 | 0 | 1 | 0 | # | st |
| 521 | 1 | 1 | 1.575000  | 7.765255029  | -16.343538432 | 0.000270632  | 0 | 1 | 0 | # | ao |
| 522 | 1 | 1 | 1.575000  | 5.176905029  | -11.888988432 | 0.000270632  | 0 | 1 | 0 | # | ao |
| 523 | 1 | 1 | 1.575000  | 7.764844971  | -10.383761568 | -0.000270632 | 0 | 1 | 0 | # | ao |
| 524 | 1 | 1 | 1.575000  | 10.353194971 | -14.838311568 | -0.000270632 | 0 | 1 | 0 | # | ao |
| 525 | 1 | 2 | 0.425000  | 8.911350872  | -13.360932678 | 1.486115063  | 0 | 1 | 0 | # | ho |
| 526 | 1 | 2 | 0.425000  | 6.323000872  | -17.815482678 | 1.486115063  | 0 | 1 | 0 | # | ho |
| 527 | 1 | 2 | 0.425000  | 6.618749128  | -13.366367322 | -1.486115063 | 0 | 1 | 0 | # | ho |
| 528 | 1 | 2 | 0.425000  | 9.207099128  | -8.911817322  | -1.486115063 | 0 | 1 | 0 | # | ho |
| 529 | 1 | 3 | -1.050000 | 6.158014655  | -16.140698519 | -1.033422068 | 0 | 1 | 0 | # | ob |
| 530 | 1 | 3 | -1.050000 | 10.200217264 | -11.513103874 | -3.231846262 | 0 | 1 | 0 | # | ob |
| 531 | 1 | 3 | -1.050000 | 8.746944487  | -15.044550680 | -1.033631378 | 0 | 1 | 0 | # | ob |
| 532 | 1 | 3 | -1.050000 | 7.611539092  | -10.769489700 | -3.233079711 | 0 | 1 | 0 | # | ob |
| 533 | 1 | 3 | -1.050000 | 6.158594487  | -10.590000680 | -1.033631378 | 0 | 1 | 0 | # | ob |
| 534 | 1 | 3 | -1.050000 | 6.783155513  | -11.682749320 | 1.033631378  | 0 | 1 | 0 | # | ob |
| 535 | 1 | 3 | -1.050000 | 10.199889092 | -15.224039700 | -3.233079711 | 0 | 1 | 0 | # | ob |
| 536 | 1 | 3 | -1.050000 | 6.783735345  | -15.041151481 | 1.033422068  | 0 | 1 | 0 | # | ob |
| 537 | 1 | 3 | -1.050000 | 7.918232736  | -10.759646126 | 3.231846262  | 0 | 1 | 0 | # | ob |
| 538 | 1 | 3 | -1.050000 | 9.372085345  | -10.586601481 | 1.033422068  | 0 | 1 | 0 | # | ob |
| 539 | 1 | 3 | -1.050000 | 5.329882736  | -15.214196126 | 3.231846262  | 0 | 1 | 0 | # | ob |
| 540 | 1 | 3 | -1.050000 | 7.918560908  | -15.957810300 | 3.233079711  | 0 | 1 | 0 | # | ob |
| 541 | 1 | 4 | -0.950000 | 7.175957657  | -17.817259004 | 1.012582885  | 0 | 1 | 0 | # | oh |
| 542 | 1 | 3 | -1.050000 | 9.843781651  | -17.814223030 | 3.061482417  | 0 | 1 | 0 | # | ob |
| 543 | 1 | 4 | -0.950000 | 9.764307657  | -13.362709004 | 1.012582885  | 0 | 1 | 0 | # | oh |
| 544 | 1 | 3 | -1.050000 | 7.255431651  | -13.359673030 | 3.061482417  | 0 | 1 | 0 | # | ob |
| 545 | 1 | 4 | -0.950000 | 8.354142343  | -8.910040996  | -1.012582885 | 0 | 1 | 0 | # | oh |
| 546 | 1 | 3 | -1.050000 | 5.686318349  | -8.913076970  | -3.061482417 | 0 | 1 | 0 | # | ob |
| 547 | 1 | 4 | -0.950000 | 5.765792343  | -13.364590996 | -1.012582885 | 0 | 1 | 0 | # | oh |
| 548 | 1 | 3 | -1.050000 | 8.274668349  | -13.367626970 | -3.061482417 | 0 | 1 | 0 | # | ob |
| 549 | 1 | 3 | -1.050000 | 9.371505513  | -16.137299320 | 1.033631378  | 0 | 1 | 0 | # | ob |
| 550 | 1 | 3 | -1.050000 | 5.330210908  | -11.503260300 | 3.233079711  | 0 | 1 | 0 | # | ob |
| 551 | 1 | 3 | -1.050000 | 8.746364655  | -11.686148519 | -1.033422068 | 0 | 1 | 0 | # | ob |
| 552 | 1 | 3 | -1.050000 | 7.611867264  | -15.967653874 | -3.231846262 | 0 | 1 | 0 | # | ob |
| 553 | 1 | 5 | 2.100000  | 9.399697014  | -16.291080796 | 2.662777170  | 0 | 1 | 0 | # | st |
| 554 | 1 | 5 | 2.100000  | 8.718727774  | -11.844829218 | -2.661798097 | 0 | 1 | 0 | # | st |
| 555 | 1 | 5 | 2.100000  | 6.130402986  | -10.436219204 | -2.662777170 | 0 | 1 | 0 | # | st |
| 556 | 1 | 5 | 2.100000  | 8.718752986  | -14.890769204 | -2.662777170 | 0 | 1 | 0 | # | st |
| 557 | 1 | 5 | 2.100000  | 9.399722226  | -10.427920782 | 2.661798097  | 0 | 1 | 0 | # | st |
| 558 | 1 | 5 | 2.100000  | 6.811372226  | -14.882470782 | 2.661798097  | 0 | 1 | 0 | # | st |
| 559 | 1 | 5 | 2.100000  | 6.811347014  | -11.836530796 | 2.662777170  | 0 | 1 | 0 | # | st |
| 560 | 1 | 5 | 2.100000  | 6.130377774  | -16.299379218 | -2.661798097 | 0 | 1 | 0 | # | st |
| 561 | 1 | 1 | 1.575000  | 12.941955029 | -16.343538432 | 0.000270632  | 0 | 1 | 0 | # | ao |
| 562 | 1 | 1 | 1.575000  | 10.353605029 | -11.888988432 | 0.000270632  | 0 | 1 | 0 | # | ao |
| 563 | 1 | 1 | 1.575000  | 12.941544971 | -10.383761568 | -0.000270632 | 0 | 1 | 0 | # | ao |
| 564 | 1 | 1 | 1.575000  | 15.529894971 | -14.838311568 | -0.000270632 | 0 | 1 | 0 | # | ao |
| 565 | 1 | 2 | 0.425000  | 14.088050872 | -13.360932678 | 1.486115063  | 0 | 1 | 0 | # | ho |
| 566 | 1 | 2 | 0.425000  | 11.499700872 | -17.815482678 | 1.486115063  | 0 | 1 | 0 | # | ho |
| 567 | 1 | 2 | 0.425000  | 11.795449128 | -13.366367322 | -1.486115063 | 0 | 1 | 0 | # | ho |
| 568 | 1 | 2 | 0.425000  | 14.383799128 | -8.911817322  | -1.486115063 | 0 | 1 | 0 | # | ho |
| 569 | 1 | 3 | -1.050000 | 11.334714655 | -16.140698519 | -1.033422068 | 0 | 1 | 0 | # | ob |
| 570 | 1 | 3 | -1.050000 | 15.376917264 | -11.513103874 | -3.231846262 | 0 | 1 | 0 | # | ob |
| 571 | 1 | 3 | -1.050000 | 13.923644487 | -15.044550680 | -1.033631378 | 0 | 1 | 0 | # | ob |
| 572 | 1 | 3 | -1.050000 | 12.788239092 | -10.769489700 | -3.233079711 | 0 | 1 | 0 | # | ob |
| 573 | 1 | 3 | -1.050000 | 11.335294487 | -10.590000680 | -1.033631378 | 0 | 1 | 0 | # | ob |
| 574 | 1 | 3 | -1.050000 | 11.959855513 | -11.682749320 | 1.033631378  | 0 | 1 | 0 | # | ob |
| 575 | 1 | 3 | -1.050000 | 15.376589092 | -15.224039700 | -3.233079711 | 0 | 1 | 0 | # | ob |
| 576 | 1 | 3 | -1.050000 | 11.960435345 | -15.041151481 | 1.033422068  | 0 | 1 | 0 | # | ob |
| 577 | 1 | 3 | -1.050000 | 13.094932736 | -10.759646126 | 3.231846262  | 0 | 1 | 0 | # | ob |
| 578 | 1 | 3 | -1.050000 | 14.548785345 | -10.586601481 | 1.033422068  | 0 | 1 | 0 | # | ob |
| 579 | 1 | 3 | -1.050000 | 10.506582736 | -15.214196126 | 3.231846262  | 0 | 1 | 0 | # | ob |
| 580 | 1 | 3 | -1.050000 | 13.095260908 | -15.957810300 | 3.233079711  | 0 | 1 | 0 | # | ob |
| 581 | 1 | 4 | -0.950000 | 12.352657657 | -17.817259004 | 1.012582885  | 0 | 1 | 0 | # | oh |
| 582 | 1 | 3 | -1.050000 | 15.020481651 | -17.814223030 | 3.061482417  | 0 | 1 | 0 | # | ob |
| 583 | 1 | 4 | -0.950000 | 14.941007657 | -13.362709004 | 1.012582885  | 0 | 1 | 0 | # | oh |
| 584 | 1 | 3 | -1.050000 | 12.432131651 | -13.359673030 | 3.061482417  | 0 | 1 | 0 | # | ob |
| 585 | 1 | 4 | -0.950000 | 13.530842343 | -8.910040996  | -1.012582885 | 0 | 1 | 0 | # | oh |

586 1 3 -1.050000 10.863018349 -8.913076970 -3.061482417 0 1 0 # ob  
587 1 4 -0.950000 10.942492343 -13.364590996 -1.012582885 0 1 0 # oh  
588 1 3 -1.050000 13.451368349 -13.367626970 -3.061482417 0 1 0 # ob  
589 1 3 -1.050000 14.548205513 -16.137299320 1.033631378 0 1 0 # ob  
590 1 3 -1.050000 10.506910908 -11.503260300 3.233079711 0 1 0 # ob  
591 1 3 -1.050000 13.923064655 -11.686148519 -1.033422068 0 1 0 # ob  
592 1 3 -1.050000 12.788567264 -15.967653874 -3.231846262 0 1 0 # ob  
593 1 5 2.100000 14.576397014 -16.291080796 2.662777170 0 1 0 # st  
594 1 5 2.100000 13.895427774 -11.844829218 -2.661798097 0 1 0 # st  
595 1 5 2.100000 11.307102986 -10.436219204 -2.662777170 0 1 0 # st  
596 1 5 2.100000 13.895452986 -14.890769204 -2.662777170 0 1 0 # st  
597 1 5 2.100000 14.576422226 -10.427920782 2.661798097 0 1 0 # st  
598 1 5 2.100000 11.988072226 -14.882470782 2.661798097 0 1 0 # st  
599 1 5 2.100000 11.988047014 -11.836530796 2.662777170 0 1 0 # st  
600 1 5 2.100000 11.307077774 -16.299379218 -2.661798097 0 1 0 # st  
601 1 1 1.575000 -12.941544971 -16.343538432 0.000270632 1 1 0 # ao  
602 1 1 1.575000 -15.529894971 -11.888988432 0.000270632 1 1 0 # ao  
603 1 1 1.575000 -12.941955029 -10.383761568 -0.000270632 1 1 0 # ao  
604 1 1 1.575000 -10.353605029 -14.838311568 -0.000270632 1 1 0 # ao  
605 1 2 0.425000 -11.795449128 -13.360932678 1.486115063 1 1 0 # ho  
606 1 2 0.425000 -14.383799128 -17.815482678 1.486115063 1 1 0 # ho  
607 1 2 0.425000 -14.088050872 -13.366367322 -1.486115063 1 1 0 # ho  
608 1 2 0.425000 -11.499700872 -8.911817322 -1.486115063 1 1 0 # ho  
609 1 3 -1.050000 -14.548785345 -16.140698519 -1.033422068 1 1 0 # ob  
610 1 3 -1.050000 -10.506582736 -11.513103874 -3.231846262 1 1 0 # ob  
611 1 3 -1.050000 -11.959855513 -15.044550680 -1.033631378 1 1 0 # ob  
612 1 3 -1.050000 -13.095260908 -10.769489700 -3.233079711 1 1 0 # ob  
613 1 3 -1.050000 -14.548205513 -10.590000680 -1.033631378 1 1 0 # ob  
614 1 3 -1.050000 -13.923644487 -11.682749320 1.033631378 1 1 0 # ob  
615 1 3 -1.050000 -10.506910908 -15.224039700 -3.233079711 1 1 0 # ob  
616 1 3 -1.050000 -13.923064655 -15.041151481 1.033422068 1 1 0 # ob  
617 1 3 -1.050000 -12.788567264 -10.759646126 3.231846262 1 1 0 # ob  
618 1 3 -1.050000 -11.334714655 -10.586601481 1.033422068 1 1 0 # ob  
619 1 3 -1.050000 -15.376917264 -15.214196126 3.231846262 1 1 0 # ob  
620 1 3 -1.050000 -12.788239092 -15.957810300 3.233079711 1 1 0 # ob  
621 1 4 -0.950000 -13.530842343 -17.817259004 1.012582885 1 1 0 # oh  
622 1 3 -1.050000 -10.863018349 -17.814223030 3.061482417 1 1 0 # ob  
623 1 4 -0.950000 -10.942492343 -13.362709004 1.012582885 1 1 0 # oh  
624 1 3 -1.050000 -13.451368349 -13.359673030 3.061482417 1 1 0 # ob  
625 1 4 -0.950000 -12.352657657 -8.910040996 -1.012582885 1 1 0 # oh  
626 1 3 -1.050000 -15.020481651 -8.913076970 -3.061482417 1 1 0 # ob  
627 1 4 -0.950000 -14.941007657 -13.364590996 -1.012582885 1 1 0 # oh  
628 1 3 -1.050000 -12.432131651 -13.367626970 -3.061482417 1 1 0 # ob  
629 1 3 -1.050000 -11.335294487 -16.137299320 1.033631378 1 1 0 # ob  
630 1 3 -1.050000 -15.376589092 -11.503260300 3.233079711 1 1 0 # ob  
631 1 3 -1.050000 -11.960435345 -11.686148519 -1.033422068 1 1 0 # ob  
632 1 3 -1.050000 -13.094932736 -15.967653874 -3.231846262 1 1 0 # ob  
633 1 5 2.100000 -11.307102986 -16.291080796 2.662777170 1 1 0 # st  
634 1 5 2.100000 -11.988072226 -11.844829218 -2.661798097 1 1 0 # st  
635 1 5 2.100000 -14.576397014 -10.436219204 -2.662777170 1 1 0 # st  
636 1 5 2.100000 -11.988047014 -14.890769204 -2.662777170 1 1 0 # st  
637 1 5 2.100000 -11.307077774 -10.427920782 2.661798097 1 1 0 # st  
638 1 5 2.100000 -13.895427774 -14.882470782 2.661798097 1 1 0 # st  
639 1 5 2.100000 -13.895452986 -11.836530796 2.662777170 1 1 0 # st  
640 1 5 2.100000 -14.576422226 -16.299379218 -2.661798097 1 1 0 # st  
641 1 1 1.575000 -7.764844971 -16.343538432 0.000270632 1 1 0 # ao  
642 1 1 1.575000 -10.353194971 -11.888988432 0.000270632 1 1 0 # ao  
643 1 1 1.575000 -7.765255029 -10.383761568 -0.000270632 1 1 0 # ao  
644 1 1 1.575000 -5.176905029 -14.838311568 -0.000270632 1 1 0 # ao  
645 1 2 0.425000 -6.618749128 -13.360932678 1.486115063 1 1 0 # ho  
646 1 2 0.425000 -9.207099128 -17.815482678 1.486115063 1 1 0 # ho  
647 1 2 0.425000 -8.911350872 -13.366367322 -1.486115063 1 1 0 # ho  
648 1 2 0.425000 -6.323000872 -8.911817322 -1.486115063 1 1 0 # ho  
649 1 3 -1.050000 -9.372085345 -16.140698519 -1.033422068 1 1 0 # ob  
650 1 3 -1.050000 -5.329882736 -11.513103874 -3.231846262 1 1 0 # ob  
651 1 3 -1.050000 -6.783155513 -15.044550680 -1.033631378 1 1 0 # ob  
652 1 3 -1.050000 -7.918560908 -10.769489700 -3.233079711 1 1 0 # ob  
653 1 3 -1.050000 -9.371505513 -10.590000680 -1.033631378 1 1 0 # ob  
654 1 3 -1.050000 -8.746944487 -11.682749320 1.033631378 1 1 0 # ob  
655 1 3 -1.050000 -5.330210908 -15.224039700 -3.233079711 1 1 0 # ob  
656 1 3 -1.050000 -8.746364655 -15.041151481 1.033422068 1 1 0 # ob  
657 1 3 -1.050000 -7.611867264 -10.759646126 3.231846262 1 1 0 # ob  
658 1 3 -1.050000 -6.158014655 -10.586601481 1.033422068 1 1 0 # ob  
659 1 3 -1.050000 -10.200217264 -15.214196126 3.231846262 1 1 0 # ob  
660 1 3 -1.050000 -7.611539092 -15.957810300 3.233079711 1 1 0 # ob  
661 1 4 -0.950000 -8.354142343 -17.817259004 1.012582885 1 1 0 # oh  
662 1 3 -1.050000 -5.686318349 -17.814223030 3.061482417 1 1 0 # ob  
663 1 4 -0.950000 -5.765792343 -13.362709004 1.012582885 1 1 0 # oh  
664 1 3 -1.050000 -8.274668349 -13.359673030 3.061482417 1 1 0 # ob  
665 1 4 -0.950000 -7.175957657 -8.910040996 -1.012582885 1 1 0 # oh  
666 1 3 -1.050000 -9.843781651 -8.913076970 -3.061482417 1 1 0 # ob  
667 1 4 -0.950000 -9.764307657 -13.364590996 -1.012582885 1 1 0 # oh  
668 1 3 -1.050000 -7.255431651 -13.367626970 -3.061482417 1 1 0 # ob  
669 1 3 -1.050000 -6.158594487 -16.137299320 1.033631378 1 1 0 # ob  
670 1 3 -1.050000 -10.199889092 -11.503260300 3.233079711 1 1 0 # ob  
671 1 3 -1.050000 -6.783735345 -11.686148519 -1.033422068 1 1 0 # ob  
672 1 3 -1.050000 -7.918232736 -15.967653874 -3.231846262 1 1 0 # ob  
673 1 5 2.100000 -6.130402986 -16.291080796 2.662777170 1 1 0 # st  
674 1 5 2.100000 -6.811372226 -11.844829218 -2.661798097 1 1 0 # st  
675 1 5 2.100000 -9.399697014 -10.436219204 -2.662777170 1 1 0 # st  
676 1 5 2.100000 -6.811347014 -14.890769204 -2.662777170 1 1 0 # st  
677 1 5 2.100000 -6.130377774 -10.427920782 2.661798097 1 1 0 # st  
678 1 5 2.100000 -8.718727774 -14.882470782 2.661798097 1 1 0 # st

|     |   |   |           |              |               |              |   |   |   |   |    |
|-----|---|---|-----------|--------------|---------------|--------------|---|---|---|---|----|
| 679 | 1 | 5 | 2.100000  | -8.718752986 | -11.836530796 | 2.662777170  | 1 | 1 | 0 | # | st |
| 680 | 1 | 5 | 2.100000  | -9.399722226 | -16.299379218 | -2.661798097 | 1 | 1 | 0 | # | st |
| 681 | 1 | 1 | 1.575000  | -2.588144971 | -16.343538432 | 0.000270632  | 1 | 1 | 0 | # | ao |
| 682 | 1 | 1 | 1.575000  | -5.176494971 | -11.888988432 | 0.000270632  | 1 | 1 | 0 | # | ao |
| 683 | 1 | 1 | 1.575000  | -2.588555029 | -10.383761568 | -0.000270632 | 1 | 1 | 0 | # | ao |
| 684 | 1 | 1 | 1.575000  | -0.000205029 | -14.838311568 | -0.000270632 | 1 | 1 | 0 | # | ao |
| 685 | 1 | 2 | 0.425000  | -1.442049128 | -13.360932678 | 1.486115063  | 1 | 1 | 0 | # | ho |
| 686 | 1 | 2 | 0.425000  | -4.030399128 | -17.815482678 | 1.486115063  | 1 | 1 | 0 | # | ho |
| 687 | 1 | 2 | 0.425000  | -3.734650872 | -13.366367322 | -1.486115063 | 1 | 1 | 0 | # | ho |
| 688 | 1 | 2 | 0.425000  | -1.146300872 | -8.911817322  | -1.486115063 | 1 | 1 | 0 | # | ho |
| 689 | 1 | 3 | -1.050000 | -4.195385345 | -16.140698519 | -1.033422068 | 1 | 1 | 0 | # | ob |
| 690 | 1 | 3 | -1.050000 | -0.153182736 | -11.513103874 | -3.231846262 | 1 | 1 | 0 | # | ob |
| 691 | 1 | 3 | -1.050000 | -1.606455513 | -15.044550680 | -1.033631378 | 1 | 1 | 0 | # | ob |
| 692 | 1 | 3 | -1.050000 | -2.741860908 | -10.769489700 | -3.233079711 | 1 | 1 | 0 | # | ob |
| 693 | 1 | 3 | -1.050000 | -4.194805513 | -10.590000680 | -1.033631378 | 1 | 1 | 0 | # | ob |
| 694 | 1 | 3 | -1.050000 | -3.570244487 | -11.682749320 | 1.033631378  | 1 | 1 | 0 | # | ob |
| 695 | 1 | 3 | -1.050000 | -0.153510908 | -15.224039700 | -3.233079711 | 1 | 1 | 0 | # | ob |
| 696 | 1 | 3 | -1.050000 | -3.569664655 | -15.041151481 | 1.033422068  | 1 | 1 | 0 | # | ob |
| 697 | 1 | 3 | -1.050000 | -2.435167264 | -10.759646126 | 3.231846262  | 1 | 1 | 0 | # | ob |
| 698 | 1 | 3 | -1.050000 | -0.981314655 | -10.586601481 | 1.033422068  | 1 | 1 | 0 | # | ob |
| 699 | 1 | 3 | -1.050000 | -5.023517264 | -15.214196126 | 3.231846262  | 1 | 1 | 0 | # | ob |
| 700 | 1 | 3 | -1.050000 | -2.434839092 | -15.957810300 | 3.233079711  | 1 | 1 | 0 | # | ob |
| 701 | 1 | 4 | -0.950000 | -3.177442343 | -17.817259004 | 1.012582885  | 1 | 1 | 0 | # | oh |
| 702 | 1 | 3 | -1.050000 | -0.509618349 | -17.814223030 | 3.061482417  | 1 | 1 | 0 | # | ob |
| 703 | 1 | 4 | -0.950000 | -0.589092343 | -13.362709004 | 1.012582885  | 1 | 1 | 0 | # | oh |
| 704 | 1 | 3 | -1.050000 | -3.097968349 | -13.359673030 | 3.061482417  | 1 | 1 | 0 | # | ob |
| 705 | 1 | 4 | -0.950000 | -1.999257657 | -8.910040996  | -1.012582885 | 1 | 1 | 0 | # | oh |
| 706 | 1 | 3 | -1.050000 | -4.667081651 | -8.913076970  | -3.061482417 | 1 | 1 | 0 | # | ob |
| 707 | 1 | 4 | -0.950000 | -4.587607657 | -13.364590996 | -1.012582885 | 1 | 1 | 0 | # | oh |
| 708 | 1 | 3 | -1.050000 | -2.078731651 | -13.367626970 | -3.061482417 | 1 | 1 | 0 | # | ob |
| 709 | 1 | 3 | -1.050000 | -0.981894487 | -16.137299320 | 1.033631378  | 1 | 1 | 0 | # | ob |
| 710 | 1 | 3 | -1.050000 | -5.023189092 | -11.503260300 | 3.233079711  | 1 | 1 | 0 | # | ob |
| 711 | 1 | 3 | -1.050000 | -1.607035345 | -11.686148519 | -1.033422068 | 1 | 1 | 0 | # | ob |
| 712 | 1 | 3 | -1.050000 | -2.741532736 | -15.967653874 | -3.231846262 | 1 | 1 | 0 | # | ob |
| 713 | 1 | 5 | 2.100000  | -0.953702986 | -16.291080796 | 2.662777170  | 1 | 1 | 0 | # | st |
| 714 | 1 | 5 | 2.100000  | -1.634672226 | -11.844829218 | -2.661798097 | 1 | 1 | 0 | # | st |
| 715 | 1 | 5 | 2.100000  | -4.222997014 | -10.436219204 | -2.662777170 | 1 | 1 | 0 | # | st |
| 716 | 1 | 5 | 2.100000  | -1.634647014 | -14.890769204 | -2.662777170 | 1 | 1 | 0 | # | st |
| 717 | 1 | 5 | 2.100000  | -0.953677774 | -10.427920782 | 2.661798097  | 1 | 1 | 0 | # | st |
| 718 | 1 | 5 | 2.100000  | -3.542027774 | -14.882470782 | 2.661798097  | 1 | 1 | 0 | # | st |
| 719 | 1 | 5 | 2.100000  | -3.542052986 | -11.836530796 | 2.662777170  | 1 | 1 | 0 | # | st |
| 720 | 1 | 5 | 2.100000  | -4.223022226 | -16.299379218 | -2.661798097 | 1 | 1 | 0 | # | st |
| 721 | 1 | 1 | 1.575000  | 2.588555029  | -7.434438432  | 0.000270632  | 0 | 1 | 0 | # | ao |
| 722 | 1 | 1 | 1.575000  | 0.000205029  | -2.979888432  | 0.000270632  | 0 | 1 | 0 | # | ao |
| 723 | 1 | 1 | 1.575000  | 2.588144971  | -1.474661568  | -0.000270632 | 0 | 1 | 0 | # | ao |
| 724 | 1 | 1 | 1.575000  | 5.176494971  | -5.929211568  | -0.000270632 | 0 | 1 | 0 | # | ao |
| 725 | 1 | 2 | 0.425000  | 3.734650872  | -4.451832678  | 1.486115063  | 0 | 1 | 0 | # | ho |
| 726 | 1 | 2 | 0.425000  | 1.146300872  | -8.906382678  | 1.486115063  | 0 | 1 | 0 | # | ho |
| 727 | 1 | 2 | 0.425000  | 1.442049128  | -4.457267322  | -1.486115063 | 0 | 1 | 0 | # | ho |
| 728 | 1 | 2 | 0.425000  | 4.030399128  | -0.002717322  | -1.486115063 | 0 | 1 | 0 | # | ho |
| 729 | 1 | 3 | -1.050000 | 0.981314655  | -7.231598519  | -1.033422068 | 0 | 1 | 0 | # | ob |
| 730 | 1 | 3 | -1.050000 | 5.023517264  | -2.604003874  | -3.231846262 | 0 | 1 | 0 | # | ob |
| 731 | 1 | 3 | -1.050000 | 3.570244487  | -6.135450680  | -1.033631378 | 0 | 1 | 0 | # | ob |
| 732 | 1 | 3 | -1.050000 | 2.434839092  | -1.860389700  | -3.233079711 | 0 | 1 | 0 | # | ob |
| 733 | 1 | 3 | -1.050000 | 0.981894487  | -1.680900680  | -1.033631378 | 0 | 1 | 0 | # | ob |
| 734 | 1 | 3 | -1.050000 | 1.606455513  | -2.773649320  | 1.033631378  | 0 | 1 | 0 | # | ob |
| 735 | 1 | 3 | -1.050000 | 5.023189092  | -6.314939700  | -3.233079711 | 0 | 1 | 0 | # | ob |
| 736 | 1 | 3 | -1.050000 | 1.607035345  | -6.132051481  | 1.033422068  | 0 | 1 | 0 | # | ob |
| 737 | 1 | 3 | -1.050000 | 2.741532736  | -1.850546126  | 3.231846262  | 0 | 1 | 0 | # | ob |
| 738 | 1 | 3 | -1.050000 | 4.195385345  | -1.677501481  | 1.033422068  | 0 | 1 | 0 | # | ob |
| 739 | 1 | 3 | -1.050000 | 0.153182736  | -6.305096126  | 3.231846262  | 0 | 1 | 0 | # | ob |
| 740 | 1 | 3 | -1.050000 | 2.741860908  | -7.048710300  | 3.233079711  | 0 | 1 | 0 | # | ob |
| 741 | 1 | 4 | -0.950000 | 1.999257657  | -8.908159004  | 1.012582885  | 0 | 1 | 0 | # | oh |
| 742 | 1 | 3 | -1.050000 | 4.667081651  | -8.905123030  | 3.061482417  | 0 | 1 | 0 | # | ob |
| 743 | 1 | 4 | -0.950000 | 4.587607657  | -4.453609004  | 1.012582885  | 0 | 1 | 0 | # | oh |
| 744 | 1 | 3 | -1.050000 | 2.078731651  | -4.450573030  | 3.061482417  | 0 | 1 | 0 | # | ob |
| 745 | 1 | 4 | -0.950000 | 3.177442343  | -0.000940996  | -1.012582885 | 0 | 1 | 0 | # | oh |
| 746 | 1 | 3 | -1.050000 | 0.509618349  | -0.003976970  | -3.061482417 | 0 | 1 | 0 | # | ob |
| 747 | 1 | 4 | -0.950000 | 0.589092343  | -4.455490996  | -1.012582885 | 0 | 1 | 0 | # | oh |
| 748 | 1 | 3 | -1.050000 | 3.097968349  | -4.458526970  | -3.061482417 | 0 | 1 | 0 | # | ob |
| 749 | 1 | 3 | -1.050000 | 4.194805513  | -7.228199320  | 1.033631378  | 0 | 1 | 0 | # | ob |
| 750 | 1 | 3 | -1.050000 | 0.153510908  | -2.594160300  | 3.233079711  | 0 | 1 | 0 | # | ob |
| 751 | 1 | 3 | -1.050000 | 3.569664655  | -2.777048519  | -1.033422068 | 0 | 1 | 0 | # | ob |
| 752 | 1 | 3 | -1.050000 | 2.435167264  | -7.058553874  | -3.231846262 | 0 | 1 | 0 | # | ob |
| 753 | 1 | 5 | 2.100000  | 4.222997014  | -7.381980796  | 2.662777170  | 0 | 1 | 0 | # | st |
| 754 | 1 | 5 | 2.100000  | 3.542027774  | -2.935729218  | -2.661798097 | 0 | 1 | 0 | # | st |
| 755 | 1 | 5 | 2.100000  | 0.953702986  | -1.527119204  | -2.662777170 | 0 | 1 | 0 | # | st |
| 756 | 1 | 5 | 2.100000  | 3.542052986  | -5.981669204  | -2.662777170 | 0 | 1 | 0 | # | st |
| 757 | 1 | 5 | 2.100000  | 4.223022226  | -1.518820782  | 2.661798097  | 0 | 1 | 0 | # | st |
| 758 | 1 | 5 | 2.100000  | 1.634672226  | -5.973370782  | 2.661798097  | 0 | 1 | 0 | # | st |
| 759 | 1 | 5 | 2.100000  | 1.634647014  | -2.927430796  | 2.662777170  | 0 | 1 | 0 | # | st |
| 760 | 1 | 5 | 2.100000  | 0.953677774  | -7.390279218  | -2.661798097 | 0 | 1 | 0 | # | st |
| 761 | 1 | 1 | 1.575000  | 7.765255029  | -7.434438432  | 0.000270632  | 0 | 1 | 0 | # | ao |
| 762 | 1 | 1 | 1.575000  | 5.176905029  | -2.979888432  | 0.000270632  | 0 | 1 | 0 | # | ao |
| 763 | 1 | 1 | 1.575000  | 7.764844971  | -1.474661568  | -0.000270632 | 0 | 1 | 0 | # | ao |
| 764 | 1 | 1 | 1.575000  | 10.353194971 | -5.929211568  | -0.000270632 | 0 | 1 | 0 | # | ao |
| 765 | 1 | 2 | 0.425000  | 8.911350872  | -4.451832678  | 1.486115063  | 0 | 1 | 0 | # | ho |
| 766 | 1 | 2 | 0.425000  | 6.323000872  | -8.906382678  | 1.486115063  | 0 | 1 | 0 | # | ho |
| 767 | 1 | 2 | 0.425000  | 6.618749128  | -4.457267322  | -1.486115063 | 0 | 1 | 0 | # | ho |
| 768 | 1 | 2 | 0.425000  | 9.207099128  | -0.002717322  | -1.486115063 | 0 | 1 | 0 | # | ho |
| 769 | 1 | 3 | -1.050000 | 6.158014655  | -7.231598519  | -1.033422068 | 0 | 1 | 0 | # | ob |
| 770 | 1 | 3 | -1.050000 | 10.200217264 | -2.604003874  | -3.231846262 | 0 | 1 | 0 | # | ob |
| 771 | 1 | 3 | -1.050000 | 8.746944487  | -6.135450680  | -1.033631378 | 0 | 1 | 0 | # | ob |



|     |   |   |           |               |              |              |   |   |   |   |    |
|-----|---|---|-----------|---------------|--------------|--------------|---|---|---|---|----|
| 772 | 1 | 3 | -1.050000 | 7.611539092   | -1.860389700 | -3.233079711 | 0 | 1 | 0 | # | ob |
| 773 | 1 | 3 | -1.050000 | 6.158594487   | -1.680900680 | -1.033631378 | 0 | 1 | 0 | # | ob |
| 774 | 1 | 3 | -1.050000 | 6.783155513   | -2.773649320 | 1.033631378  | 0 | 1 | 0 | # | ob |
| 775 | 1 | 3 | -1.050000 | 10.199889092  | -6.314939700 | -3.233079711 | 0 | 1 | 0 | # | ob |
| 776 | 1 | 3 | -1.050000 | 6.783735345   | -6.132051481 | 1.033422068  | 0 | 1 | 0 | # | ob |
| 777 | 1 | 3 | -1.050000 | 7.918232736   | -1.850546126 | 3.231846262  | 0 | 1 | 0 | # | ob |
| 778 | 1 | 3 | -1.050000 | 9.372085345   | -1.677501481 | 1.033422068  | 0 | 1 | 0 | # | ob |
| 779 | 1 | 3 | -1.050000 | 5.329882736   | -6.305096126 | 3.231846262  | 0 | 1 | 0 | # | ob |
| 780 | 1 | 3 | -1.050000 | 7.918560908   | -7.048710300 | 3.233079711  | 0 | 1 | 0 | # | ob |
| 781 | 1 | 4 | -0.950000 | 7.175957657   | -8.908159004 | 1.012582885  | 0 | 1 | 0 | # | oh |
| 782 | 1 | 3 | -1.050000 | 9.843781651   | -8.905123030 | 3.061482417  | 0 | 1 | 0 | # | ob |
| 783 | 1 | 4 | -0.950000 | 9.764307657   | -4.453609004 | 1.012582885  | 0 | 1 | 0 | # | oh |
| 784 | 1 | 3 | -1.050000 | 7.255431651   | -4.450573030 | 3.061482417  | 0 | 1 | 0 | # | ob |
| 785 | 1 | 4 | -0.950000 | 8.354142343   | -0.000940996 | -1.012582885 | 0 | 1 | 0 | # | oh |
| 786 | 1 | 3 | -1.050000 | 5.686318349   | -0.003976970 | -3.061482417 | 0 | 1 | 0 | # | ob |
| 787 | 1 | 4 | -0.950000 | 5.765792343   | -4.455490996 | -1.012582885 | 0 | 1 | 0 | # | oh |
| 788 | 1 | 3 | -1.050000 | 8.274668349   | -4.458526970 | -3.061482417 | 0 | 1 | 0 | # | ob |
| 789 | 1 | 3 | -1.050000 | 9.371505513   | -7.228199320 | 1.033631378  | 0 | 1 | 0 | # | ob |
| 790 | 1 | 3 | -1.050000 | 5.330210908   | -2.594160300 | 3.233079711  | 0 | 1 | 0 | # | ob |
| 791 | 1 | 3 | -1.050000 | 8.746364655   | -2.777048519 | -1.033422068 | 0 | 1 | 0 | # | ob |
| 792 | 1 | 3 | -1.050000 | 7.611867264   | -7.058553874 | -3.231846262 | 0 | 1 | 0 | # | ob |
| 793 | 1 | 5 | 2.100000  | 9.399697014   | -7.381980796 | 2.662777170  | 0 | 1 | 0 | # | st |
| 794 | 1 | 5 | 2.100000  | 8.718727774   | -2.935729218 | -2.661798097 | 0 | 1 | 0 | # | st |
| 795 | 1 | 5 | 2.100000  | 6.130402986   | -1.527119204 | -2.662777170 | 0 | 1 | 0 | # | st |
| 796 | 1 | 5 | 2.100000  | 8.718752986   | -5.981669204 | -2.662777170 | 0 | 1 | 0 | # | st |
| 797 | 1 | 5 | 2.100000  | 9.399722226   | -1.518820782 | 2.661798097  | 0 | 1 | 0 | # | st |
| 798 | 1 | 5 | 2.100000  | 6.811372226   | -5.973370782 | 2.661798097  | 0 | 1 | 0 | # | st |
| 799 | 1 | 5 | 2.100000  | 6.811347014   | -2.927430796 | 2.662777170  | 0 | 1 | 0 | # | st |
| 800 | 1 | 5 | 2.100000  | 6.130377774   | -7.390279218 | -2.661798097 | 0 | 1 | 0 | # | st |
| 801 | 1 | 1 | 1.575000  | 12.941955029  | -7.434438432 | 0.000270632  | 0 | 1 | 0 | # | ao |
| 802 | 1 | 1 | 1.575000  | 10.353605029  | -2.979888432 | 0.000270632  | 0 | 1 | 0 | # | ao |
| 803 | 1 | 1 | 1.575000  | 12.941544971  | -1.474661568 | -0.000270632 | 0 | 1 | 0 | # | ao |
| 804 | 1 | 1 | 1.575000  | 15.529894971  | -5.929211568 | -0.000270632 | 0 | 1 | 0 | # | ao |
| 805 | 1 | 2 | 0.425000  | 14.088050872  | -4.451832678 | 1.486115063  | 0 | 1 | 0 | # | ho |
| 806 | 1 | 2 | 0.425000  | 11.499700872  | -8.906382678 | 1.486115063  | 0 | 1 | 0 | # | ho |
| 807 | 1 | 2 | 0.425000  | 11.795449128  | -4.457267322 | -1.486115063 | 0 | 1 | 0 | # | ho |
| 808 | 1 | 2 | 0.425000  | 14.383799128  | -0.002717322 | -1.486115063 | 0 | 1 | 0 | # | ho |
| 809 | 1 | 3 | -1.050000 | 11.334714655  | -7.231598519 | -1.033422068 | 0 | 1 | 0 | # | ob |
| 810 | 1 | 3 | -1.050000 | 15.376917264  | -2.604003874 | -3.231846262 | 0 | 1 | 0 | # | ob |
| 811 | 1 | 3 | -1.050000 | 13.923644487  | -6.135450680 | -1.033631378 | 0 | 1 | 0 | # | ob |
| 812 | 1 | 3 | -1.050000 | 12.788239092  | -1.860389700 | -3.233079711 | 0 | 1 | 0 | # | ob |
| 813 | 1 | 3 | -1.050000 | 11.335294487  | -1.680900680 | -1.033631378 | 0 | 1 | 0 | # | ob |
| 814 | 1 | 3 | -1.050000 | 11.959855513  | -2.773649320 | 1.033631378  | 0 | 1 | 0 | # | ob |
| 815 | 1 | 3 | -1.050000 | 15.376589092  | -6.314939700 | -3.233079711 | 0 | 1 | 0 | # | ob |
| 816 | 1 | 3 | -1.050000 | 11.960435345  | -6.132051481 | 1.033422068  | 0 | 1 | 0 | # | ob |
| 817 | 1 | 3 | -1.050000 | 13.094932736  | -1.850546126 | 3.231846262  | 0 | 1 | 0 | # | ob |
| 818 | 1 | 3 | -1.050000 | 14.548785345  | -1.677501481 | 1.033422068  | 0 | 1 | 0 | # | ob |
| 819 | 1 | 3 | -1.050000 | 10.506582736  | -6.305096126 | 3.231846262  | 0 | 1 | 0 | # | ob |
| 820 | 1 | 3 | -1.050000 | 13.095260908  | -7.048710300 | 3.233079711  | 0 | 1 | 0 | # | ob |
| 821 | 1 | 4 | -0.950000 | 12.352657657  | -8.908159004 | 1.012582885  | 0 | 1 | 0 | # | oh |
| 822 | 1 | 3 | -1.050000 | 15.020481651  | -8.905123030 | 3.061482417  | 0 | 1 | 0 | # | ob |
| 823 | 1 | 4 | -0.950000 | 14.941007657  | -4.453609004 | 1.012582885  | 0 | 1 | 0 | # | oh |
| 824 | 1 | 3 | -1.050000 | 12.432131651  | -4.450573030 | 3.061482417  | 0 | 1 | 0 | # | ob |
| 825 | 1 | 4 | -0.950000 | 13.530842343  | -0.000940996 | -1.012582885 | 0 | 1 | 0 | # | oh |
| 826 | 1 | 3 | -1.050000 | 10.863018349  | -0.003976970 | -3.061482417 | 0 | 1 | 0 | # | ob |
| 827 | 1 | 4 | -0.950000 | 10.942492343  | -4.455490996 | -1.012582885 | 0 | 1 | 0 | # | oh |
| 828 | 1 | 3 | -1.050000 | 13.451368349  | -4.458526970 | -3.061482417 | 0 | 1 | 0 | # | ob |
| 829 | 1 | 3 | -1.050000 | 14.548205513  | -7.228199320 | 1.033631378  | 0 | 1 | 0 | # | ob |
| 830 | 1 | 3 | -1.050000 | 10.506910908  | -2.594160300 | 3.233079711  | 0 | 1 | 0 | # | ob |
| 831 | 1 | 3 | -1.050000 | 13.923064655  | -2.777048519 | -1.033422068 | 0 | 1 | 0 | # | ob |
| 832 | 1 | 3 | -1.050000 | 12.788567264  | -7.058553874 | -3.231846262 | 0 | 1 | 0 | # | ob |
| 833 | 1 | 5 | 2.100000  | 14.576397014  | -7.381980796 | 2.662777170  | 0 | 1 | 0 | # | st |
| 834 | 1 | 5 | 2.100000  | 13.895427774  | -2.935729218 | -2.661798097 | 0 | 1 | 0 | # | st |
| 835 | 1 | 5 | 2.100000  | 11.307102986  | -1.527119204 | -2.662777170 | 0 | 1 | 0 | # | st |
| 836 | 1 | 5 | 2.100000  | 13.895452986  | -5.981669204 | -2.662777170 | 0 | 1 | 0 | # | st |
| 837 | 1 | 5 | 2.100000  | 14.576422226  | -1.518820782 | 2.661798097  | 0 | 1 | 0 | # | st |
| 838 | 1 | 5 | 2.100000  | 11.988072226  | -5.973370782 | 2.661798097  | 0 | 1 | 0 | # | st |
| 839 | 1 | 5 | 2.100000  | 11.988047014  | -2.927430796 | 2.662777170  | 0 | 1 | 0 | # | st |
| 840 | 1 | 5 | 2.100000  | 11.307077774  | -7.390279218 | -2.661798097 | 0 | 1 | 0 | # | st |
| 841 | 1 | 1 | 1.575000  | -12.941544971 | -7.434438432 | 0.000270632  | 1 | 1 | 0 | # | ao |
| 842 | 1 | 1 | 1.575000  | -15.529894971 | -2.979888432 | 0.000270632  | 1 | 1 | 0 | # | ao |
| 843 | 1 | 1 | 1.575000  | -12.941955029 | -1.474661568 | -0.000270632 | 1 | 1 | 0 | # | ao |
| 844 | 1 | 1 | 1.575000  | -10.353605029 | -5.929211568 | -0.000270632 | 1 | 1 | 0 | # | ao |
| 845 | 1 | 2 | 0.425000  | -11.795449128 | -4.451832678 | 1.486115063  | 1 | 1 | 0 | # | ho |
| 846 | 1 | 2 | 0.425000  | -14.383799128 | -8.906382678 | 1.486115063  | 1 | 1 | 0 | # | ho |
| 847 | 1 | 2 | 0.425000  | -14.088050872 | -4.457267322 | -1.486115063 | 1 | 1 | 0 | # | ho |
| 848 | 1 | 2 | 0.425000  | -11.499700872 | -0.002717322 | -1.486115063 | 1 | 1 | 0 | # | ho |
| 849 | 1 | 3 | -1.050000 | -14.548785345 | -7.231598519 | -1.033422068 | 1 | 1 | 0 | # | ob |
| 850 | 1 | 3 | -1.050000 | -10.506582736 | -2.604003874 | -3.231846262 | 1 | 1 | 0 | # | ob |
| 851 | 1 | 3 | -1.050000 | -11.959855513 | -6.135450680 | -1.033631378 | 1 | 1 | 0 | # | ob |
| 852 | 1 | 3 | -1.050000 | -13.095260908 | -1.860389700 | -3.233079711 | 1 | 1 | 0 | # | ob |
| 853 | 1 | 3 | -1.050000 | -14.548205513 | -1.680900680 | -1.033631378 | 1 | 1 | 0 | # | ob |
| 854 | 1 | 3 | -1.050000 | -13.923644487 | -2.773649320 | 1.033631378  | 1 | 1 | 0 | # | ob |
| 855 | 1 | 3 | -1.050000 | -10.506910908 | -6.314939700 | -3.233079711 | 1 | 1 | 0 | # | ob |
| 856 | 1 | 3 | -1.050000 | -13.923064655 | -6.132051481 | 1.033422068  | 1 | 1 | 0 | # | ob |
| 857 | 1 | 3 | -1.050000 | -12.788567264 | -1.850546126 | 3.231846262  | 1 | 1 | 0 | # | ob |
| 858 | 1 | 3 | -1.050000 | -11.334714655 | -1.677501481 | 1.033422068  | 1 | 1 | 0 | # | ob |
| 859 | 1 | 3 | -1.050000 | -15.376917264 | -6.305096126 | 3.231846262  | 1 | 1 | 0 | # | ob |
| 860 | 1 | 3 | -1.050000 | -12.788239092 | -7.048710300 | 3.233079711  | 1 | 1 | 0 | # | ob |
| 861 | 1 | 4 | -0.950000 | -13.530842343 | -8.908159004 | 1.012582885  | 1 | 1 | 0 | # | oh |
| 862 | 1 | 3 | -1.050000 | -10.863018349 | -8.905123030 | 3.061482417  | 1 | 1 | 0 | # | ob |
| 863 | 1 | 4 | -0.950000 | -10.942492343 | -4.453609004 | 1.012582885  | 1 | 1 | 0 | # | oh |
| 864 | 1 | 3 | -1.050000 | -13.451368349 | -4.450573030 | 3.061482417  | 1 | 1 | 0 | # | ob |

|     |   |   |           |               |              |              |   |   |   |   |    |
|-----|---|---|-----------|---------------|--------------|--------------|---|---|---|---|----|
| 865 | 1 | 4 | -0.950000 | -12.352657657 | -0.000940996 | -1.012582885 | 1 | 1 | 0 | # | oh |
| 866 | 1 | 3 | -1.050000 | -15.020481651 | -0.003976970 | -3.061482417 | 1 | 1 | 0 | # | ob |
| 867 | 1 | 4 | -0.950000 | -14.941007657 | -4.455490996 | -1.012582885 | 1 | 1 | 0 | # | oh |
| 868 | 1 | 3 | -1.050000 | -12.432131651 | -4.458526970 | -3.061482417 | 1 | 1 | 0 | # | ob |
| 869 | 1 | 3 | -1.050000 | -11.335294487 | -7.228199320 | 1.033631378  | 1 | 1 | 0 | # | ob |
| 870 | 1 | 3 | -1.050000 | -15.376589092 | -2.594160300 | 3.233079711  | 1 | 1 | 0 | # | ob |
| 871 | 1 | 3 | -1.050000 | -11.960435345 | -2.777048519 | -1.033422068 | 1 | 1 | 0 | # | ob |
| 872 | 1 | 3 | -1.050000 | -13.094932736 | -7.058553874 | -3.231846262 | 1 | 1 | 0 | # | ob |
| 873 | 1 | 5 | 2.100000  | -11.307102986 | -7.381980796 | 2.662777170  | 1 | 1 | 0 | # | st |
| 874 | 1 | 5 | 2.100000  | -11.988072226 | -2.935729218 | -2.661798097 | 1 | 1 | 0 | # | st |
| 875 | 1 | 5 | 2.100000  | -14.576397014 | -1.527119204 | -2.662777170 | 1 | 1 | 0 | # | st |
| 876 | 1 | 5 | 2.100000  | -11.988047014 | -5.981669204 | -2.662777170 | 1 | 1 | 0 | # | st |
| 877 | 1 | 5 | 2.100000  | -11.307077774 | -1.518820782 | 2.661798097  | 1 | 1 | 0 | # | st |
| 878 | 1 | 5 | 2.100000  | -13.895427774 | -5.973370782 | 2.661798097  | 1 | 1 | 0 | # | st |
| 879 | 1 | 5 | 2.100000  | -13.895452986 | -2.927430796 | 2.662777170  | 1 | 1 | 0 | # | st |
| 880 | 1 | 5 | 2.100000  | -14.576422226 | -7.390279218 | -2.661798097 | 1 | 1 | 0 | # | st |
| 881 | 1 | 1 | 1.575000  | -7.764844971  | -7.434438432 | 0.000270632  | 1 | 1 | 0 | # | ao |
| 882 | 1 | 1 | 1.575000  | -10.353194971 | -2.979888432 | 0.000270632  | 1 | 1 | 0 | # | ao |
| 883 | 1 | 1 | 1.575000  | -7.765255029  | -1.474661568 | -0.000270632 | 1 | 1 | 0 | # | ao |
| 884 | 1 | 1 | 1.575000  | -5.176905029  | -5.929211568 | -0.000270632 | 1 | 1 | 0 | # | ao |
| 885 | 1 | 2 | 0.425000  | -6.618749128  | -4.451832678 | 1.486115063  | 1 | 1 | 0 | # | ho |
| 886 | 1 | 2 | 0.425000  | -9.207099128  | -8.906382678 | 1.486115063  | 1 | 1 | 0 | # | ho |
| 887 | 1 | 2 | 0.425000  | -8.911350872  | -4.457267322 | -1.486115063 | 1 | 1 | 0 | # | ho |
| 888 | 1 | 2 | 0.425000  | -6.323000872  | -0.002717322 | -1.486115063 | 1 | 1 | 0 | # | ho |
| 889 | 1 | 3 | -1.050000 | -9.372085345  | -7.231598519 | -1.033422068 | 1 | 1 | 0 | # | ob |
| 890 | 1 | 3 | -1.050000 | -5.329882736  | -2.604003874 | -3.231846262 | 1 | 1 | 0 | # | ob |
| 891 | 1 | 3 | -1.050000 | -6.783155513  | -6.135450680 | -1.033631378 | 1 | 1 | 0 | # | ob |
| 892 | 1 | 3 | -1.050000 | -7.918560908  | -1.860389700 | -3.233079711 | 1 | 1 | 0 | # | ob |
| 893 | 1 | 3 | -1.050000 | -9.371505513  | -1.680900680 | -1.033631378 | 1 | 1 | 0 | # | ob |
| 894 | 1 | 3 | -1.050000 | -8.746944487  | -2.773649320 | 1.033631378  | 1 | 1 | 0 | # | ob |
| 895 | 1 | 3 | -1.050000 | -5.330210908  | -6.314939700 | -3.233079711 | 1 | 1 | 0 | # | ob |
| 896 | 1 | 3 | -1.050000 | -8.746364655  | -6.132051481 | 1.033422068  | 1 | 1 | 0 | # | ob |
| 897 | 1 | 3 | -1.050000 | -7.611867264  | -1.850546126 | 3.231846262  | 1 | 1 | 0 | # | ob |
| 898 | 1 | 3 | -1.050000 | -6.158014655  | -1.677501481 | 1.033422068  | 1 | 1 | 0 | # | ob |
| 899 | 1 | 3 | -1.050000 | -10.200217264 | -6.305096126 | 3.231846262  | 1 | 1 | 0 | # | ob |
| 900 | 1 | 3 | -1.050000 | -7.611539092  | -7.048710300 | 3.233079711  | 1 | 1 | 0 | # | ob |
| 901 | 1 | 4 | -0.950000 | -8.354142343  | -8.908159004 | 1.012582885  | 1 | 1 | 0 | # | oh |
| 902 | 1 | 3 | -1.050000 | -5.686318349  | -8.905123030 | 3.061482417  | 1 | 1 | 0 | # | ob |
| 903 | 1 | 4 | -0.950000 | -5.765792343  | -4.453609004 | 1.012582885  | 1 | 1 | 0 | # | oh |
| 904 | 1 | 3 | -1.050000 | -8.274668349  | -4.450573030 | 3.061482417  | 1 | 1 | 0 | # | ob |
| 905 | 1 | 4 | -0.950000 | -7.175957657  | -0.000940996 | -1.012582885 | 1 | 1 | 0 | # | oh |
| 906 | 1 | 3 | -1.050000 | -9.843781651  | -0.003976970 | -3.061482417 | 1 | 1 | 0 | # | ob |
| 907 | 1 | 4 | -0.950000 | -9.764307657  | -4.455490996 | -1.012582885 | 1 | 1 | 0 | # | oh |
| 908 | 1 | 3 | -1.050000 | -7.255431651  | -4.458526970 | -3.061482417 | 1 | 1 | 0 | # | ob |
| 909 | 1 | 3 | -1.050000 | -6.158594487  | -7.228199320 | 1.033631378  | 1 | 1 | 0 | # | ob |
| 910 | 1 | 3 | -1.050000 | -10.199889092 | -2.594160300 | 3.233079711  | 1 | 1 | 0 | # | ob |
| 911 | 1 | 3 | -1.050000 | -6.783735345  | -2.777048519 | -1.033422068 | 1 | 1 | 0 | # | ob |
| 912 | 1 | 3 | -1.050000 | -7.918232736  | -7.058553874 | -3.231846262 | 1 | 1 | 0 | # | ob |
| 913 | 1 | 5 | 2.100000  | -6.130402986  | -7.381980796 | 2.662777170  | 1 | 1 | 0 | # | st |
| 914 | 1 | 5 | 2.100000  | -6.811372226  | -2.935729218 | -2.661798097 | 1 | 1 | 0 | # | st |
| 915 | 1 | 5 | 2.100000  | -9.399697014  | -1.527119204 | -2.662777170 | 1 | 1 | 0 | # | st |
| 916 | 1 | 5 | 2.100000  | -6.811347014  | -5.981669204 | -2.662777170 | 1 | 1 | 0 | # | st |
| 917 | 1 | 5 | 2.100000  | -6.130377774  | -1.518820782 | 2.661798097  | 1 | 1 | 0 | # | st |
| 918 | 1 | 5 | 2.100000  | -8.718727774  | -5.973370782 | 2.661798097  | 1 | 1 | 0 | # | st |
| 919 | 1 | 5 | 2.100000  | -8.718752986  | -2.927430796 | 2.662777170  | 1 | 1 | 0 | # | st |
| 920 | 1 | 5 | 2.100000  | -9.399722226  | -7.390279218 | -2.661798097 | 1 | 1 | 0 | # | st |
| 921 | 1 | 1 | 1.575000  | -2.588144971  | -7.434438432 | 0.000270632  | 1 | 1 | 0 | # | ao |
| 922 | 1 | 1 | 1.575000  | -5.176494971  | -2.979888432 | 0.000270632  | 1 | 1 | 0 | # | ao |
| 923 | 1 | 1 | 1.575000  | -2.588555029  | -1.474661568 | -0.000270632 | 1 | 1 | 0 | # | ao |
| 924 | 1 | 1 | 1.575000  | -0.000205029  | -5.929211568 | -0.000270632 | 1 | 1 | 0 | # | ao |
| 925 | 1 | 2 | 0.425000  | -1.442049128  | -4.451832678 | 1.486115063  | 1 | 1 | 0 | # | ho |
| 926 | 1 | 2 | 0.425000  | -4.030399128  | -8.906382678 | 1.486115063  | 1 | 1 | 0 | # | ho |
| 927 | 1 | 2 | 0.425000  | -3.734650872  | -4.457267322 | -1.486115063 | 1 | 1 | 0 | # | ho |
| 928 | 1 | 2 | 0.425000  | -1.146300872  | -0.002717322 | -1.486115063 | 1 | 1 | 0 | # | ho |
| 929 | 1 | 3 | -1.050000 | -4.195385345  | -7.231598519 | -1.033422068 | 1 | 1 | 0 | # | ob |
| 930 | 1 | 3 | -1.050000 | -0.153182736  | -2.604003874 | -3.231846262 | 1 | 1 | 0 | # | ob |
| 931 | 1 | 3 | -1.050000 | -1.606455513  | -6.135450680 | -1.033631378 | 1 | 1 | 0 | # | ob |
| 932 | 1 | 3 | -1.050000 | -2.741860908  | -1.860389700 | -3.233079711 | 1 | 1 | 0 | # | ob |
| 933 | 1 | 3 | -1.050000 | -4.194805513  | -1.680900680 | -1.033631378 | 1 | 1 | 0 | # | ob |
| 934 | 1 | 3 | -1.050000 | -3.570244487  | -2.773649320 | 1.033631378  | 1 | 1 | 0 | # | ob |
| 935 | 1 | 3 | -1.050000 | -0.153510908  | -6.314939700 | -3.233079711 | 1 | 1 | 0 | # | ob |
| 936 | 1 | 3 | -1.050000 | -3.569664655  | -6.132051481 | 1.033422068  | 1 | 1 | 0 | # | ob |
| 937 | 1 | 3 | -1.050000 | -2.435167264  | -1.850546126 | 3.231846262  | 1 | 1 | 0 | # | ob |
| 938 | 1 | 3 | -1.050000 | -0.981314655  | -1.677501481 | 1.033422068  | 1 | 1 | 0 | # | ob |
| 939 | 1 | 3 | -1.050000 | -5.023517264  | -6.305096126 | 3.231846262  | 1 | 1 | 0 | # | ob |
| 940 | 1 | 3 | -1.050000 | -2.434839092  | -7.048710300 | 3.233079711  | 1 | 1 | 0 | # | ob |
| 941 | 1 | 4 | -0.950000 | -3.177442343  | -8.908159004 | 1.012582885  | 1 | 1 | 0 | # | oh |
| 942 | 1 | 3 | -1.050000 | -0.509618349  | -8.905123030 | 3.061482417  | 1 | 1 | 0 | # | ob |
| 943 | 1 | 4 | -0.950000 | -0.589092343  | -4.453609004 | 1.012582885  | 1 | 1 | 0 | # | oh |
| 944 | 1 | 3 | -1.050000 | -3.097968349  | -4.450573030 | 3.061482417  | 1 | 1 | 0 | # | ob |
| 945 | 1 | 4 | -0.950000 | -1.999257657  | -0.000940996 | -1.012582885 | 1 | 1 | 0 | # | oh |
| 946 | 1 | 3 | -1.050000 | -4.667081651  | -0.003976970 | -3.061482417 | 1 | 1 | 0 | # | ob |
| 947 | 1 | 4 | -0.950000 | -4.587607657  | -4.455490996 | -1.012582885 | 1 | 1 | 0 | # | oh |
| 948 | 1 | 3 | -1.050000 | -2.078731651  | -4.458526970 | -3.061482417 | 1 | 1 | 0 | # | ob |
| 949 | 1 | 3 | -1.050000 | -0.981894487  | -7.228199320 | 1.033631378  | 1 | 1 | 0 | # | ob |
| 950 | 1 | 3 | -1.050000 | -5.023189092  | -2.594160300 | 3.233079711  | 1 | 1 | 0 | # | ob |
| 951 | 1 | 3 | -1.050000 | -1.607035345  | -2.777048519 | -1.033422068 | 1 | 1 | 0 | # | ob |
| 952 | 1 | 3 | -1.050000 | -2.741532736  | -7.058553874 | -3.231846262 | 1 | 1 | 0 | # | ob |
| 953 | 1 | 5 | 2.100000  | -0.953702986  | -7.381980796 | 2.662777170  | 1 | 1 | 0 | # | st |
| 954 | 1 | 5 | 2.100000  | -1.634672226  | -2.935729218 | -2.661798097 | 1 | 1 | 0 | # | st |
| 955 | 1 | 5 | 2.100000  | -4.222997014  | -1.527119204 | -2.662777170 | 1 | 1 | 0 | # | st |
| 956 | 1 | 5 | 2.100000  | -1.634647014  | -5.981669204 | -2.662777170 | 1 | 1 | 0 | # | st |
| 957 | 1 | 5 | 2.100000  | -0.953677774  | -1.518820782 | 2.661798097  | 1 | 1 | 0 | # | st |

|      |   |   |           |              |              |              |   |   |   |   |    |
|------|---|---|-----------|--------------|--------------|--------------|---|---|---|---|----|
| 958  | 1 | 5 | 2.100000  | -3.542027774 | -5.973370782 | 2.661798097  | 1 | 1 | 0 | # | st |
| 959  | 1 | 5 | 2.100000  | -3.542052986 | -2.927430796 | 2.662777170  | 1 | 1 | 0 | # | st |
| 960  | 1 | 5 | 2.100000  | -4.223022226 | -7.390279218 | -2.661798097 | 1 | 1 | 0 | # | st |
| 961  | 1 | 1 | 1.575000  | 2.588555029  | 1.474661568  | 9.332770632  | 0 | 0 | 0 | # | ao |
| 962  | 1 | 1 | 1.575000  | 0.000205029  | 5.929211568  | 9.332770632  | 0 | 0 | 0 | # | ao |
| 963  | 1 | 1 | 1.575000  | 2.588144971  | 7.434438432  | 9.332229368  | 0 | 0 | 0 | # | ao |
| 964  | 1 | 1 | 1.575000  | 5.176494971  | 2.979888432  | 9.332229368  | 0 | 0 | 0 | # | ao |
| 965  | 1 | 2 | 0.425000  | 3.734650872  | 4.457267322  | 10.818615063 | 0 | 0 | 0 | # | ho |
| 966  | 1 | 2 | 0.425000  | 1.146300872  | 0.002717322  | 10.818615063 | 0 | 0 | 0 | # | ho |
| 967  | 1 | 2 | 0.425000  | 1.442049128  | 4.451832678  | 7.846384937  | 0 | 0 | 0 | # | ho |
| 968  | 1 | 2 | 0.425000  | 4.030399128  | 8.906382678  | 7.846384937  | 0 | 0 | 0 | # | ho |
| 969  | 1 | 3 | -1.050000 | 0.981314655  | 1.677501481  | 8.299077932  | 0 | 0 | 0 | # | ob |
| 970  | 1 | 3 | -1.050000 | 5.023517264  | 6.305096126  | 6.100653738  | 0 | 0 | 0 | # | ob |
| 971  | 1 | 3 | -1.050000 | 3.570244487  | 2.773649320  | 8.298868622  | 0 | 0 | 0 | # | ob |
| 972  | 1 | 3 | -1.050000 | 2.434839092  | 7.048710300  | 6.099420289  | 0 | 0 | 0 | # | ob |
| 973  | 1 | 3 | -1.050000 | 0.981894487  | 7.228199320  | 8.298868622  | 0 | 0 | 0 | # | ob |
| 974  | 1 | 3 | -1.050000 | 1.606455513  | 6.135450680  | 10.366131378 | 0 | 0 | 0 | # | ob |
| 975  | 1 | 3 | -1.050000 | 5.023189092  | 2.594160300  | 6.099420289  | 0 | 0 | 0 | # | ob |
| 976  | 1 | 3 | -1.050000 | 1.607035345  | 2.777048519  | 10.365922068 | 0 | 0 | 0 | # | ob |
| 977  | 1 | 3 | -1.050000 | 2.741532736  | 7.058553874  | 12.564346262 | 0 | 0 | 0 | # | ob |
| 978  | 1 | 3 | -1.050000 | 4.195385345  | 7.231598519  | 10.365922068 | 0 | 0 | 0 | # | ob |
| 979  | 1 | 3 | -1.050000 | 0.153182736  | 2.604003874  | 12.564346262 | 0 | 0 | 0 | # | ob |
| 980  | 1 | 3 | -1.050000 | 2.741860908  | 1.860389700  | 12.565579711 | 0 | 0 | 0 | # | ob |
| 981  | 1 | 4 | -0.950000 | 1.999257657  | 0.000940996  | 10.345082885 | 0 | 0 | 0 | # | oh |
| 982  | 1 | 3 | -1.050000 | 4.667081651  | 0.003976970  | 12.393982417 | 0 | 0 | 0 | # | ob |
| 983  | 1 | 4 | -0.950000 | 4.587607657  | 4.455490996  | 10.345082885 | 0 | 0 | 0 | # | oh |
| 984  | 1 | 3 | -1.050000 | 2.078731651  | 4.458526970  | 12.393982417 | 0 | 0 | 0 | # | ob |
| 985  | 1 | 4 | -0.950000 | 3.177442343  | 8.908159004  | 8.319917115  | 0 | 0 | 0 | # | oh |
| 986  | 1 | 3 | -1.050000 | 0.509618349  | 8.905123030  | 6.271017583  | 0 | 0 | 0 | # | ob |
| 987  | 1 | 4 | -0.950000 | 0.589092343  | 4.453609004  | 8.319917115  | 0 | 0 | 0 | # | oh |
| 988  | 1 | 3 | -1.050000 | 3.097968349  | 4.450573030  | 6.271017583  | 0 | 0 | 0 | # | ob |
| 989  | 1 | 3 | -1.050000 | 4.194805513  | 1.680900680  | 10.366131378 | 0 | 0 | 0 | # | ob |
| 990  | 1 | 3 | -1.050000 | 0.153510908  | 6.314939700  | 12.565579711 | 0 | 0 | 0 | # | ob |
| 991  | 1 | 3 | -1.050000 | 3.569646555  | 6.132051481  | 8.299077932  | 0 | 0 | 0 | # | ob |
| 992  | 1 | 3 | -1.050000 | 2.435167264  | 1.850546126  | 6.100653738  | 0 | 0 | 0 | # | ob |
| 993  | 1 | 5 | 2.100000  | 4.222997014  | 1.527119204  | 11.995277170 | 0 | 0 | 0 | # | st |
| 994  | 1 | 5 | 2.100000  | 3.542027774  | 5.973370782  | 6.670701903  | 0 | 0 | 0 | # | st |
| 995  | 1 | 5 | 2.100000  | 0.953702986  | 7.381980796  | 6.669722830  | 0 | 0 | 0 | # | st |
| 996  | 1 | 5 | 2.100000  | 3.542052986  | 2.927430796  | 6.669722830  | 0 | 0 | 0 | # | st |
| 997  | 1 | 5 | 2.100000  | 4.223022226  | 7.390279218  | 11.994298097 | 0 | 0 | 0 | # | st |
| 998  | 1 | 5 | 2.100000  | 1.634672226  | 2.935729218  | 11.994298097 | 0 | 0 | 0 | # | st |
| 999  | 1 | 5 | 2.100000  | 1.634647014  | 5.981669204  | 11.995277170 | 0 | 0 | 0 | # | st |
| 1000 | 1 | 5 | 2.100000  | 0.953677774  | 1.518820782  | 6.670701903  | 0 | 0 | 0 | # | st |
| 1001 | 1 | 1 | 1.575000  | 7.765255029  | 1.474661568  | 9.332770632  | 0 | 0 | 0 | # | ao |
| 1002 | 1 | 1 | 1.575000  | 5.176905029  | 5.929211568  | 9.332770632  | 0 | 0 | 0 | # | ao |
| 1003 | 1 | 1 | 1.575000  | 7.764844971  | 7.434438432  | 9.332229368  | 0 | 0 | 0 | # | ao |
| 1004 | 1 | 1 | 1.575000  | 10.353194971 | 2.979888432  | 9.332229368  | 0 | 0 | 0 | # | ao |
| 1005 | 1 | 2 | 0.425000  | 8.911350872  | 4.457267322  | 10.818615063 | 0 | 0 | 0 | # | ho |
| 1006 | 1 | 2 | 0.425000  | 6.323000872  | 0.002717322  | 10.818615063 | 0 | 0 | 0 | # | ho |
| 1007 | 1 | 2 | 0.425000  | 6.618749128  | 4.451832678  | 7.846384937  | 0 | 0 | 0 | # | ho |
| 1008 | 1 | 2 | 0.425000  | 9.207099128  | 8.906382678  | 7.846384937  | 0 | 0 | 0 | # | ho |
| 1009 | 1 | 3 | -1.050000 | 6.158014655  | 1.677501481  | 8.299077932  | 0 | 0 | 0 | # | ob |
| 1010 | 1 | 3 | -1.050000 | 10.200217264 | 6.305096126  | 6.100653738  | 0 | 0 | 0 | # | ob |
| 1011 | 1 | 3 | -1.050000 | 8.746944487  | 2.773649320  | 8.298868622  | 0 | 0 | 0 | # | ob |
| 1012 | 1 | 3 | -1.050000 | 7.611539092  | 7.048710300  | 6.099420289  | 0 | 0 | 0 | # | ob |
| 1013 | 1 | 3 | -1.050000 | 6.158594487  | 7.228199320  | 8.298868622  | 0 | 0 | 0 | # | ob |
| 1014 | 1 | 3 | -1.050000 | 6.783155513  | 6.135450680  | 10.366131378 | 0 | 0 | 0 | # | ob |
| 1015 | 1 | 3 | -1.050000 | 10.199889092 | 2.594160300  | 6.099420289  | 0 | 0 | 0 | # | ob |
| 1016 | 1 | 3 | -1.050000 | 6.783735345  | 2.777048519  | 10.365922068 | 0 | 0 | 0 | # | ob |
| 1017 | 1 | 3 | -1.050000 | 7.918232736  | 7.058553874  | 12.564346262 | 0 | 0 | 0 | # | ob |
| 1018 | 1 | 3 | -1.050000 | 9.372085345  | 7.231598519  | 10.365922068 | 0 | 0 | 0 | # | ob |
| 1019 | 1 | 3 | -1.050000 | 5.329882736  | 2.604003874  | 12.564346262 | 0 | 0 | 0 | # | ob |
| 1020 | 1 | 3 | -1.050000 | 7.918560908  | 1.860389700  | 12.565579711 | 0 | 0 | 0 | # | ob |
| 1021 | 1 | 4 | -0.950000 | 7.175957657  | 0.000940996  | 10.345082885 | 0 | 0 | 0 | # | oh |
| 1022 | 1 | 3 | -1.050000 | 9.843781651  | 0.003976970  | 12.393982417 | 0 | 0 | 0 | # | ob |
| 1023 | 1 | 4 | -0.950000 | 9.764307657  | 4.455490996  | 10.345082885 | 0 | 0 | 0 | # | oh |
| 1024 | 1 | 3 | -1.050000 | 7.255431651  | 4.458526970  | 12.393982417 | 0 | 0 | 0 | # | ob |
| 1025 | 1 | 4 | -0.950000 | 8.354142343  | 8.908159004  | 8.319917115  | 0 | 0 | 0 | # | oh |
| 1026 | 1 | 3 | -1.050000 | 5.686318349  | 8.905123030  | 6.271017583  | 0 | 0 | 0 | # | ob |
| 1027 | 1 | 4 | -0.950000 | 5.765792343  | 4.453609004  | 8.319917115  | 0 | 0 | 0 | # | oh |
| 1028 | 1 | 3 | -1.050000 | 8.274668349  | 4.450573030  | 6.271017583  | 0 | 0 | 0 | # | ob |
| 1029 | 1 | 3 | -1.050000 | 9.371505513  | 1.680900680  | 10.366131378 | 0 | 0 | 0 | # | ob |
| 1030 | 1 | 3 | -1.050000 | 5.330210908  | 6.314939700  | 12.565579711 | 0 | 0 | 0 | # | ob |
| 1031 | 1 | 3 | -1.050000 | 8.746364655  | 6.132051481  | 8.299077932  | 0 | 0 | 0 | # | ob |
| 1032 | 1 | 3 | -1.050000 | 7.611867264  | 1.850546126  | 6.100653738  | 0 | 0 | 0 | # | ob |
| 1033 | 1 | 5 | 2.100000  | 9.399697014  | 1.527119204  | 11.995277170 | 0 | 0 | 0 | # | st |
| 1034 | 1 | 5 | 2.100000  | 8.718727774  | 5.973370782  | 6.670701903  | 0 | 0 | 0 | # | st |
| 1035 | 1 | 5 | 2.100000  | 6.130402986  | 7.381980796  | 6.669722830  | 0 | 0 | 0 | # | st |
| 1036 | 1 | 5 | 2.100000  | 8.718752986  | 2.927430796  | 6.669722830  | 0 | 0 | 0 | # | st |
| 1037 | 1 | 5 | 2.100000  | 9.399722226  | 7.390279218  | 11.994298097 | 0 | 0 | 0 | # | st |
| 1038 | 1 | 5 | 2.100000  | 6.811372226  | 2.935729218  | 11.994298097 | 0 | 0 | 0 | # | st |
| 1039 | 1 | 5 | 2.100000  | 6.811347014  | 5.981669204  | 11.995277170 | 0 | 0 | 0 | # | st |
| 1040 | 1 | 5 | 2.100000  | 6.130377774  | 1.518820782  | 6.670701903  | 0 | 0 | 0 | # | st |
| 1041 | 1 | 1 | 1.575000  | 12.941955029 | 1.474661568  | 9.332770632  | 0 | 0 | 0 | # | ao |
| 1042 | 1 | 1 | 1.575000  | 10.353605029 | 5.929211568  | 9.332770632  | 0 | 0 | 0 | # | ao |
| 1043 | 1 | 1 | 1.575000  | 12.941544971 | 7.434438432  | 9.332229368  | 0 | 0 | 0 | # | ao |
| 1044 | 1 | 1 | 1.575000  | 15.529894971 | 2.979888432  | 9.332229368  | 0 | 0 | 0 | # | ao |
| 1045 | 1 | 2 | 0.425000  | 14.088050872 | 4.457267322  | 10.818615063 | 0 | 0 | 0 | # | ho |
| 1046 | 1 | 2 | 0.425000  | 11.499700872 | 0.002717322  | 10.818615063 | 0 | 0 | 0 | # | ho |
| 1047 | 1 | 2 | 0.425000  | 11.795449128 | 4.451832678  | 7.846384937  | 0 | 0 | 0 | # | ho |
| 1048 | 1 | 2 | 0.425000  | 14.383799128 | 8.906382678  | 7.846384937  | 0 | 0 | 0 | # | ho |
| 1049 | 1 | 3 | -1.050000 | 11.334714655 | 1.677501481  | 8.299077932  | 0 | 0 | 0 | # | ob |
| 1050 | 1 | 3 | -1.050000 | 15.376917264 | 6.305096126  | 6.100653738  | 0 | 0 | 0 | # | ob |

|      |   |   |           |               |             |              |   |   |   |    |
|------|---|---|-----------|---------------|-------------|--------------|---|---|---|----|
| 1051 | 1 | 3 | -1.050000 | 13.923644487  | 2.773649320 | 8.298868622  | 0 | 0 | 0 | ob |
| 1052 | 1 | 3 | -1.050000 | 12.788239092  | 7.048710300 | 6.099420289  | 0 | 0 | 0 | ob |
| 1053 | 1 | 3 | -1.050000 | 11.335294487  | 7.228199320 | 8.298868622  | 0 | 0 | 0 | ob |
| 1054 | 1 | 3 | -1.050000 | 11.959855513  | 6.135450680 | 10.366131378 | 0 | 0 | 0 | ob |
| 1055 | 1 | 3 | -1.050000 | 15.376589092  | 2.594160300 | 6.099420289  | 0 | 0 | 0 | ob |
| 1056 | 1 | 3 | -1.050000 | 11.960435345  | 2.777048519 | 10.365922068 | 0 | 0 | 0 | ob |
| 1057 | 1 | 3 | -1.050000 | 13.094932736  | 7.058553874 | 12.564346262 | 0 | 0 | 0 | ob |
| 1058 | 1 | 3 | -1.050000 | 14.548785345  | 7.231598519 | 10.365922068 | 0 | 0 | 0 | ob |
| 1059 | 1 | 3 | -1.050000 | 10.506582736  | 2.604003874 | 12.564346262 | 0 | 0 | 0 | ob |
| 1060 | 1 | 3 | -1.050000 | 13.095260908  | 1.860389700 | 12.565579711 | 0 | 0 | 0 | ob |
| 1061 | 1 | 4 | -0.950000 | 12.352657657  | 0.000940996 | 10.345082885 | 0 | 0 | 0 | oh |
| 1062 | 1 | 3 | -1.050000 | 15.020481651  | 0.003976970 | 12.393982417 | 0 | 0 | 0 | ob |
| 1063 | 1 | 4 | -0.950000 | 14.941007657  | 4.455490996 | 10.345082885 | 0 | 0 | 0 | oh |
| 1064 | 1 | 3 | -1.050000 | 12.432131651  | 4.458526970 | 12.393982417 | 0 | 0 | 0 | ob |
| 1065 | 1 | 4 | -0.950000 | 13.530842343  | 8.908159004 | 8.319917115  | 0 | 0 | 0 | oh |
| 1066 | 1 | 3 | -1.050000 | 10.863018349  | 8.905123030 | 6.271017583  | 0 | 0 | 0 | ob |
| 1067 | 1 | 4 | -0.950000 | 10.942492343  | 4.453609004 | 8.319917115  | 0 | 0 | 0 | oh |
| 1068 | 1 | 3 | -1.050000 | 13.451368349  | 4.450573030 | 6.271017583  | 0 | 0 | 0 | ob |
| 1069 | 1 | 3 | -1.050000 | 14.548205513  | 1.680900680 | 10.366131378 | 0 | 0 | 0 | ob |
| 1070 | 1 | 3 | -1.050000 | 10.506910908  | 6.314939700 | 12.565579711 | 0 | 0 | 0 | ob |
| 1071 | 1 | 3 | -1.050000 | 13.923064655  | 6.132051481 | 8.299077932  | 0 | 0 | 0 | ob |
| 1072 | 1 | 3 | -1.050000 | 12.788567264  | 1.850546126 | 6.100653738  | 0 | 0 | 0 | ob |
| 1073 | 1 | 5 | 2.100000  | 14.576397014  | 1.527119204 | 11.995277170 | 0 | 0 | 0 | st |
| 1074 | 1 | 5 | 2.100000  | 13.895427774  | 5.973370782 | 6.670701903  | 0 | 0 | 0 | st |
| 1075 | 1 | 5 | 2.100000  | 11.307102986  | 7.381980796 | 6.669722830  | 0 | 0 | 0 | st |
| 1076 | 1 | 5 | 2.100000  | 13.895452986  | 2.927430796 | 6.669722830  | 0 | 0 | 0 | st |
| 1077 | 1 | 5 | 2.100000  | 14.576422226  | 7.390279218 | 11.994298097 | 0 | 0 | 0 | st |
| 1078 | 1 | 5 | 2.100000  | 11.988072226  | 2.935729218 | 11.994298097 | 0 | 0 | 0 | st |
| 1079 | 1 | 5 | 2.100000  | 11.988047014  | 5.981669204 | 11.995277170 | 0 | 0 | 0 | st |
| 1080 | 1 | 5 | 2.100000  | 11.307077774  | 1.518820782 | 6.670701903  | 0 | 0 | 0 | st |
| 1081 | 1 | 1 | 1.575000  | -12.941544971 | 1.474661568 | 9.332770632  | 1 | 0 | 0 | ao |
| 1082 | 1 | 1 | 1.575000  | -15.529894971 | 5.929211568 | 9.332770632  | 1 | 0 | 0 | ao |
| 1083 | 1 | 1 | 1.575000  | -12.941955029 | 7.434438432 | 9.332229368  | 1 | 0 | 0 | ao |
| 1084 | 1 | 1 | 1.575000  | -10.353605029 | 2.979888432 | 9.332229368  | 1 | 0 | 0 | ao |
| 1085 | 1 | 2 | 0.425000  | -11.795449128 | 4.457267322 | 10.818615063 | 1 | 0 | 0 | ho |
| 1086 | 1 | 2 | 0.425000  | -14.383799128 | 0.002717322 | 10.818615063 | 1 | 0 | 0 | ho |
| 1087 | 1 | 2 | 0.425000  | -14.088050872 | 4.451832678 | 7.846384937  | 1 | 0 | 0 | ho |
| 1088 | 1 | 2 | 0.425000  | -11.499700872 | 8.906382678 | 7.846384937  | 1 | 0 | 0 | ho |
| 1089 | 1 | 3 | -1.050000 | -14.548785345 | 1.677501481 | 8.299077932  | 1 | 0 | 0 | ob |
| 1090 | 1 | 3 | -1.050000 | -10.506582736 | 6.305096126 | 6.100653738  | 1 | 0 | 0 | ob |
| 1091 | 1 | 3 | -1.050000 | -11.959855513 | 2.773649320 | 8.298868622  | 1 | 0 | 0 | ob |
| 1092 | 1 | 3 | -1.050000 | -13.095260908 | 7.048710300 | 6.099420289  | 1 | 0 | 0 | ob |
| 1093 | 1 | 3 | -1.050000 | -14.548205513 | 7.228199320 | 8.298868622  | 1 | 0 | 0 | ob |
| 1094 | 1 | 3 | -1.050000 | -13.923644487 | 6.135450680 | 10.366131378 | 1 | 0 | 0 | ob |
| 1095 | 1 | 3 | -1.050000 | -10.506910908 | 2.594160300 | 6.099420289  | 1 | 0 | 0 | ob |
| 1096 | 1 | 3 | -1.050000 | -13.923064655 | 2.777048519 | 10.365922068 | 1 | 0 | 0 | ob |
| 1097 | 1 | 3 | -1.050000 | -12.788567264 | 7.058553874 | 12.564346262 | 1 | 0 | 0 | ob |
| 1098 | 1 | 3 | -1.050000 | -11.334714655 | 7.231598519 | 10.365922068 | 1 | 0 | 0 | ob |
| 1099 | 1 | 3 | -1.050000 | -15.376917264 | 2.604003874 | 12.564346262 | 1 | 0 | 0 | ob |
| 1100 | 1 | 3 | -1.050000 | -12.788239092 | 1.860389700 | 12.565579711 | 1 | 0 | 0 | ob |
| 1101 | 1 | 4 | -0.950000 | -13.530842343 | 0.000940996 | 10.345082885 | 1 | 0 | 0 | oh |
| 1102 | 1 | 3 | -1.050000 | -10.863018349 | 0.003976970 | 12.393982417 | 1 | 0 | 0 | ob |
| 1103 | 1 | 4 | -0.950000 | -10.942492343 | 4.455490996 | 10.345082885 | 1 | 0 | 0 | oh |
| 1104 | 1 | 3 | -1.050000 | -13.451368349 | 4.458526970 | 12.393982417 | 1 | 0 | 0 | ob |
| 1105 | 1 | 4 | -0.950000 | -12.352657657 | 8.908159004 | 8.319917115  | 1 | 0 | 0 | oh |
| 1106 | 1 | 3 | -1.050000 | -15.020481651 | 8.905123030 | 6.271017583  | 1 | 0 | 0 | ob |
| 1107 | 1 | 4 | -0.950000 | -14.941007657 | 4.453609004 | 8.319917115  | 1 | 0 | 0 | oh |
| 1108 | 1 | 3 | -1.050000 | -12.432131651 | 4.450573030 | 6.271017583  | 1 | 0 | 0 | ob |
| 1109 | 1 | 3 | -1.050000 | -11.335294487 | 1.680900680 | 10.366131378 | 1 | 0 | 0 | ob |
| 1110 | 1 | 3 | -1.050000 | -15.376589092 | 6.314939700 | 12.565579711 | 1 | 0 | 0 | ob |
| 1111 | 1 | 3 | -1.050000 | -11.960435345 | 6.132051481 | 8.299077932  | 1 | 0 | 0 | ob |
| 1112 | 1 | 3 | -1.050000 | -13.094932736 | 1.850546126 | 6.100653738  | 1 | 0 | 0 | ob |
| 1113 | 1 | 5 | 2.100000  | -11.307102986 | 1.527119204 | 11.995277170 | 1 | 0 | 0 | st |
| 1114 | 1 | 5 | 2.100000  | -11.988072226 | 5.973370782 | 6.670701903  | 1 | 0 | 0 | st |
| 1115 | 1 | 5 | 2.100000  | -14.576397014 | 7.381980796 | 6.669722830  | 1 | 0 | 0 | st |
| 1116 | 1 | 5 | 2.100000  | -11.988047014 | 2.927430796 | 6.669722830  | 1 | 0 | 0 | st |
| 1117 | 1 | 5 | 2.100000  | -11.307077774 | 7.390279218 | 11.994298097 | 1 | 0 | 0 | st |
| 1118 | 1 | 5 | 2.100000  | -13.895427774 | 2.935729218 | 11.994298097 | 1 | 0 | 0 | st |
| 1119 | 1 | 5 | 2.100000  | -13.895452986 | 5.981669204 | 11.995277170 | 1 | 0 | 0 | st |
| 1120 | 1 | 5 | 2.100000  | -14.576422226 | 1.518820782 | 6.670701903  | 1 | 0 | 0 | st |
| 1121 | 1 | 1 | 1.575000  | -7.764844971  | 1.474661568 | 9.332770632  | 1 | 0 | 0 | ao |
| 1122 | 1 | 1 | 1.575000  | -10.353194971 | 5.929211568 | 9.332770632  | 1 | 0 | 0 | ao |
| 1123 | 1 | 1 | 1.575000  | -7.765255029  | 7.434438432 | 9.332229368  | 1 | 0 | 0 | ao |
| 1124 | 1 | 1 | 1.575000  | -5.176905029  | 2.979888432 | 9.332229368  | 1 | 0 | 0 | ao |
| 1125 | 1 | 2 | 0.425000  | -6.618749128  | 4.457267322 | 10.818615063 | 1 | 0 | 0 | ho |
| 1126 | 1 | 2 | 0.425000  | -9.207099128  | 0.002717322 | 10.818615063 | 1 | 0 | 0 | ho |
| 1127 | 1 | 2 | 0.425000  | -8.911350872  | 4.451832678 | 7.846384937  | 1 | 0 | 0 | ho |
| 1128 | 1 | 2 | 0.425000  | -6.323000872  | 8.906382678 | 7.846384937  | 1 | 0 | 0 | ho |
| 1129 | 1 | 3 | -1.050000 | -9.372085345  | 1.677501481 | 8.299077932  | 1 | 0 | 0 | ob |
| 1130 | 1 | 3 | -1.050000 | -5.329882736  | 6.305096126 | 6.100653738  | 1 | 0 | 0 | ob |
| 1131 | 1 | 3 | -1.050000 | -6.783155513  | 2.773649320 | 8.298868622  | 1 | 0 | 0 | ob |
| 1132 | 1 | 3 | -1.050000 | -7.918560908  | 7.048710300 | 6.099420289  | 1 | 0 | 0 | ob |
| 1133 | 1 | 3 | -1.050000 | -9.371505513  | 7.228199320 | 8.298868622  | 1 | 0 | 0 | ob |
| 1134 | 1 | 3 | -1.050000 | -8.746944487  | 6.135450680 | 10.366131378 | 1 | 0 | 0 | ob |
| 1135 | 1 | 3 | -1.050000 | -5.330210908  | 2.594160300 | 6.099420289  | 1 | 0 | 0 | ob |
| 1136 | 1 | 3 | -1.050000 | -8.746364655  | 2.777048519 | 10.365922068 | 1 | 0 | 0 | ob |
| 1137 | 1 | 3 | -1.050000 | -7.611867264  | 7.058553874 | 12.564346262 | 1 | 0 | 0 | ob |
| 1138 | 1 | 3 | -1.050000 | -6.158014655  | 7.231598519 | 10.365922068 | 1 | 0 | 0 | ob |
| 1139 | 1 | 3 | -1.050000 | -10.200217264 | 2.604003874 | 12.564346262 | 1 | 0 | 0 | ob |
| 1140 | 1 | 3 | -1.050000 | -7.611539092  | 1.860389700 | 12.565579711 | 1 | 0 | 0 | ob |
| 1141 | 1 | 4 | -0.950000 | -8.354142343  | 0.000940996 | 10.345082885 | 1 | 0 | 0 | oh |
| 1142 | 1 | 3 | -1.050000 | -5.686318349  | 0.003976970 | 12.393982417 | 1 | 0 | 0 | ob |
| 1143 | 1 | 4 | -0.950000 | -5.765792343  | 4.455490996 | 10.345082885 | 1 | 0 | 0 | oh |

|      |   |   |           |               |              |              |   |   |   |   |    |
|------|---|---|-----------|---------------|--------------|--------------|---|---|---|---|----|
| 1144 | 1 | 3 | -1.050000 | -8.274668349  | 4.458526970  | 12.393982417 | 1 | 0 | 0 | # | ob |
| 1145 | 1 | 4 | -0.950000 | -7.175957657  | 8.908159004  | 8.319917115  | 1 | 0 | 0 | # | oh |
| 1146 | 1 | 3 | -1.050000 | -9.843781651  | 8.905123030  | 6.271017583  | 1 | 0 | 0 | # | ob |
| 1147 | 1 | 4 | -0.950000 | -9.764307657  | 4.453609004  | 8.319917115  | 1 | 0 | 0 | # | oh |
| 1148 | 1 | 3 | -1.050000 | -7.255431651  | 4.450573030  | 6.271017583  | 1 | 0 | 0 | # | ob |
| 1149 | 1 | 3 | -1.050000 | -6.158594487  | 1.680900680  | 10.366131378 | 1 | 0 | 0 | # | ob |
| 1150 | 1 | 3 | -1.050000 | -10.199889092 | 6.314939700  | 12.565579711 | 1 | 0 | 0 | # | ob |
| 1151 | 1 | 3 | -1.050000 | -6.783735345  | 6.132051481  | 8.299077932  | 1 | 0 | 0 | # | ob |
| 1152 | 1 | 3 | -1.050000 | -7.918232736  | 1.850546126  | 6.100653738  | 1 | 0 | 0 | # | ob |
| 1153 | 1 | 5 | 2.100000  | -6.130402986  | 1.527119204  | 11.995277170 | 1 | 0 | 0 | # | st |
| 1154 | 1 | 5 | 2.100000  | -6.811372226  | 5.973370782  | 6.670701903  | 1 | 0 | 0 | # | st |
| 1155 | 1 | 5 | 2.100000  | -9.399697014  | 7.381980796  | 6.669722830  | 1 | 0 | 0 | # | st |
| 1156 | 1 | 5 | 2.100000  | -6.811347014  | 2.927430796  | 6.669722830  | 1 | 0 | 0 | # | st |
| 1157 | 1 | 5 | 2.100000  | -6.130377774  | 7.390279218  | 11.994298097 | 1 | 0 | 0 | # | st |
| 1158 | 1 | 5 | 2.100000  | -8.718727774  | 2.935729218  | 11.994298097 | 1 | 0 | 0 | # | st |
| 1159 | 1 | 5 | 2.100000  | -8.718752986  | 5.981669204  | 11.995277170 | 1 | 0 | 0 | # | st |
| 1160 | 1 | 5 | 2.100000  | -9.399722226  | 1.518820782  | 6.670701903  | 1 | 0 | 0 | # | st |
| 1161 | 1 | 1 | 1.575000  | -2.588144971  | 1.474661568  | 9.332770632  | 1 | 0 | 0 | # | ao |
| 1162 | 1 | 1 | 1.575000  | -5.176494971  | 5.929211568  | 9.332770632  | 1 | 0 | 0 | # | ao |
| 1163 | 1 | 1 | 1.575000  | -2.588555029  | 7.434438432  | 9.332229368  | 1 | 0 | 0 | # | ao |
| 1164 | 1 | 1 | 1.575000  | -0.000205029  | 2.979888432  | 9.332229368  | 1 | 0 | 0 | # | ao |
| 1165 | 1 | 2 | 0.425000  | -1.442049128  | 4.457267322  | 10.818615063 | 1 | 0 | 0 | # | ho |
| 1166 | 1 | 2 | 0.425000  | -4.030399128  | 0.002717322  | 10.818615063 | 1 | 0 | 0 | # | ho |
| 1167 | 1 | 2 | 0.425000  | -3.734650872  | 4.451832678  | 7.846384937  | 1 | 0 | 0 | # | ho |
| 1168 | 1 | 2 | 0.425000  | -1.146300872  | 8.906382678  | 7.846384937  | 1 | 0 | 0 | # | ho |
| 1169 | 1 | 3 | -1.050000 | -4.195385345  | 1.677501481  | 8.299077932  | 1 | 0 | 0 | # | ob |
| 1170 | 1 | 3 | -1.050000 | -0.153182736  | 6.305096126  | 6.100653738  | 1 | 0 | 0 | # | ob |
| 1171 | 1 | 3 | -1.050000 | -1.606455513  | 2.773649320  | 8.298868622  | 1 | 0 | 0 | # | ob |
| 1172 | 1 | 3 | -1.050000 | -2.741860908  | 7.048710300  | 6.099420289  | 1 | 0 | 0 | # | ob |
| 1173 | 1 | 3 | -1.050000 | -4.194805513  | 7.228199320  | 8.298868622  | 1 | 0 | 0 | # | ob |
| 1174 | 1 | 3 | -1.050000 | -3.570244487  | 6.135450680  | 10.366131378 | 1 | 0 | 0 | # | ob |
| 1175 | 1 | 3 | -1.050000 | -0.153510908  | 2.594160300  | 6.099420289  | 1 | 0 | 0 | # | ob |
| 1176 | 1 | 3 | -1.050000 | -3.569664655  | 2.777048519  | 10.365922068 | 1 | 0 | 0 | # | ob |
| 1177 | 1 | 3 | -1.050000 | -2.435167264  | 7.058553874  | 12.564346262 | 1 | 0 | 0 | # | ob |
| 1178 | 1 | 3 | -1.050000 | -0.981314655  | 7.231598519  | 10.365922068 | 1 | 0 | 0 | # | ob |
| 1179 | 1 | 3 | -1.050000 | -5.023517264  | 2.604003874  | 12.564346262 | 1 | 0 | 0 | # | ob |
| 1180 | 1 | 3 | -1.050000 | -2.434839092  | 1.860389700  | 12.565579711 | 1 | 0 | 0 | # | ob |
| 1181 | 1 | 4 | -0.950000 | -3.177442343  | 0.000940996  | 10.345082885 | 1 | 0 | 0 | # | oh |
| 1182 | 1 | 3 | -1.050000 | -0.509618349  | 0.003976970  | 12.393982417 | 1 | 0 | 0 | # | ob |
| 1183 | 1 | 4 | -0.950000 | -0.589092343  | 4.455490996  | 10.345082885 | 1 | 0 | 0 | # | oh |
| 1184 | 1 | 3 | -1.050000 | -3.097968349  | 4.458526970  | 12.393982417 | 1 | 0 | 0 | # | ob |
| 1185 | 1 | 4 | -0.950000 | -1.999257657  | 8.908159004  | 8.319917115  | 1 | 0 | 0 | # | oh |
| 1186 | 1 | 3 | -1.050000 | -4.667081651  | 8.905123030  | 6.271017583  | 1 | 0 | 0 | # | ob |
| 1187 | 1 | 4 | -0.950000 | -4.587607657  | 4.453609004  | 8.319917115  | 1 | 0 | 0 | # | oh |
| 1188 | 1 | 3 | -1.050000 | -2.078731651  | 4.450573030  | 6.271017583  | 1 | 0 | 0 | # | ob |
| 1189 | 1 | 3 | -1.050000 | -0.981894487  | 1.680900680  | 10.366131378 | 1 | 0 | 0 | # | ob |
| 1190 | 1 | 3 | -1.050000 | -5.023189092  | 6.314939700  | 12.565579711 | 1 | 0 | 0 | # | ob |
| 1191 | 1 | 3 | -1.050000 | -1.607035345  | 6.132051481  | 8.299077932  | 1 | 0 | 0 | # | ob |
| 1192 | 1 | 3 | -1.050000 | -2.741532736  | 1.850546126  | 6.100653738  | 1 | 0 | 0 | # | ob |
| 1193 | 1 | 5 | 2.100000  | -0.953702986  | 1.527119204  | 11.995277170 | 1 | 0 | 0 | # | st |
| 1194 | 1 | 5 | 2.100000  | -1.634672226  | 5.973370782  | 6.670701903  | 1 | 0 | 0 | # | st |
| 1195 | 1 | 5 | 2.100000  | -4.222997014  | 7.381980796  | 6.669722830  | 1 | 0 | 0 | # | st |
| 1196 | 1 | 5 | 2.100000  | -1.634647014  | 2.927430796  | 6.669722830  | 1 | 0 | 0 | # | st |
| 1197 | 1 | 5 | 2.100000  | -0.953677774  | 7.390279218  | 11.994298097 | 1 | 0 | 0 | # | st |
| 1198 | 1 | 5 | 2.100000  | -3.542027774  | 2.935729218  | 11.994298097 | 1 | 0 | 0 | # | st |
| 1199 | 1 | 5 | 2.100000  | -3.542052986  | 5.981669204  | 11.995277170 | 1 | 0 | 0 | # | st |
| 1200 | 1 | 5 | 2.100000  | -4.223022226  | 1.518820782  | 6.670701903  | 1 | 0 | 0 | # | st |
| 1201 | 1 | 1 | 1.575000  | 2.588555029   | 10.383761568 | 9.332770632  | 0 | 0 | 0 | # | ao |
| 1202 | 1 | 1 | 1.575000  | 0.000205029   | 14.838311568 | 9.332770632  | 0 | 0 | 0 | # | ao |
| 1203 | 1 | 1 | 1.575000  | 2.588144971   | 16.343538432 | 9.332229368  | 0 | 0 | 0 | # | ao |
| 1204 | 1 | 1 | 1.575000  | 5.176494971   | 11.888988432 | 9.332229368  | 0 | 0 | 0 | # | ao |
| 1205 | 1 | 2 | 0.425000  | 3.734650872   | 13.366367322 | 10.818615063 | 0 | 0 | 0 | # | ho |
| 1206 | 1 | 2 | 0.425000  | 1.146300872   | 8.911817322  | 10.818615063 | 0 | 0 | 0 | # | ho |
| 1207 | 1 | 2 | 0.425000  | 1.442049128   | 13.360932678 | 7.846384937  | 0 | 0 | 0 | # | ho |
| 1208 | 1 | 2 | 0.425000  | 4.030399128   | 17.815482678 | 7.846384937  | 0 | 0 | 0 | # | ho |
| 1209 | 1 | 3 | -1.050000 | 0.981314655   | 10.586601481 | 8.299077932  | 0 | 0 | 0 | # | ob |
| 1210 | 1 | 3 | -1.050000 | 5.023517264   | 15.214196126 | 6.100653738  | 0 | 0 | 0 | # | ob |
| 1211 | 1 | 3 | -1.050000 | 3.570244487   | 11.682749320 | 8.298868622  | 0 | 0 | 0 | # | ob |
| 1212 | 1 | 3 | -1.050000 | 2.434839092   | 15.957810300 | 6.099420289  | 0 | 0 | 0 | # | ob |
| 1213 | 1 | 3 | -1.050000 | 0.981894487   | 16.137299320 | 8.298868622  | 0 | 0 | 0 | # | ob |
| 1214 | 1 | 3 | -1.050000 | 1.606455513   | 15.044550680 | 10.366131378 | 0 | 0 | 0 | # | ob |
| 1215 | 1 | 3 | -1.050000 | 5.023189092   | 11.503260300 | 6.099420289  | 0 | 0 | 0 | # | ob |
| 1216 | 1 | 3 | -1.050000 | 1.607035345   | 11.686148519 | 10.365922068 | 0 | 0 | 0 | # | ob |
| 1217 | 1 | 3 | -1.050000 | 2.741532736   | 15.967653874 | 12.564346262 | 0 | 0 | 0 | # | ob |
| 1218 | 1 | 3 | -1.050000 | 4.195385345   | 16.140698519 | 10.365922068 | 0 | 0 | 0 | # | ob |
| 1219 | 1 | 3 | -1.050000 | 0.153182736   | 11.513103874 | 12.564346262 | 0 | 0 | 0 | # | ob |
| 1220 | 1 | 3 | -1.050000 | 2.741860908   | 10.769489700 | 12.565579711 | 0 | 0 | 0 | # | ob |
| 1221 | 1 | 4 | -0.950000 | 1.999257657   | 8.910040996  | 10.345082885 | 0 | 0 | 0 | # | oh |
| 1222 | 1 | 3 | -1.050000 | 4.667081651   | 8.913076970  | 12.393982417 | 0 | 0 | 0 | # | ob |
| 1223 | 1 | 4 | -0.950000 | 4.587607657   | 13.364590996 | 10.345082885 | 0 | 0 | 0 | # | oh |
| 1224 | 1 | 3 | -1.050000 | 2.078731651   | 13.367626970 | 12.393982417 | 0 | 0 | 0 | # | ob |
| 1225 | 1 | 4 | -0.950000 | 3.177442343   | 17.817259004 | 8.319917115  | 0 | 0 | 0 | # | oh |
| 1226 | 1 | 3 | -1.050000 | 0.509618349   | 17.814223030 | 6.271017583  | 0 | 0 | 0 | # | ob |
| 1227 | 1 | 4 | -0.950000 | 0.589092343   | 13.362709004 | 8.319917115  | 0 | 0 | 0 | # | oh |
| 1228 | 1 | 3 | -1.050000 | 3.097968349   | 13.359673030 | 6.271017583  | 0 | 0 | 0 | # | ob |
| 1229 | 1 | 3 | -1.050000 | 4.194805513   | 10.590000680 | 10.366131378 | 0 | 0 | 0 | # | ob |
| 1230 | 1 | 3 | -1.050000 | 0.153510908   | 15.224039700 | 12.565579711 | 0 | 0 | 0 | # | ob |
| 1231 | 1 | 3 | -1.050000 | 3.569664655   | 15.041151481 | 8.299077932  | 0 | 0 | 0 | # | ob |
| 1232 | 1 | 3 | -1.050000 | 2.435167264   | 10.759646126 | 6.100653738  | 0 | 0 | 0 | # | ob |
| 1233 | 1 | 5 | 2.100000  | 4.222997014   | 10.436219204 | 11.995277170 | 0 | 0 | 0 | # | st |
| 1234 | 1 | 5 | 2.100000  | 3.542027774   | 14.882470782 | 6.670701903  | 0 | 0 | 0 | # | st |
| 1235 | 1 | 5 | 2.100000  | 0.953702986   | 16.291080796 | 6.669722830  | 0 | 0 | 0 | # | st |
| 1236 | 1 | 5 | 2.100000  | 3.542052986   | 11.836530796 | 6.669722830  | 0 | 0 | 0 | # | st |

|      |   |   |           |               |              |              |   |   |   |   |    |
|------|---|---|-----------|---------------|--------------|--------------|---|---|---|---|----|
| 1237 | 1 | 5 | 2.100000  | 4.223022226   | 16.299379218 | 11.994298097 | 0 | 0 | 0 | # | st |
| 1238 | 1 | 5 | 2.100000  | 1.634672226   | 11.844829218 | 11.994298097 | 0 | 0 | 0 | # | st |
| 1239 | 1 | 5 | 2.100000  | 1.634647014   | 14.890769204 | 11.995277170 | 0 | 0 | 0 | # | st |
| 1240 | 1 | 5 | 2.100000  | 0.953677774   | 10.427920782 | 6.670701903  | 0 | 0 | 0 | # | st |
| 1241 | 1 | 1 | 1.575000  | 7.765255029   | 10.383761568 | 9.332770632  | 0 | 0 | 0 | # | ao |
| 1242 | 1 | 1 | 1.575000  | 5.176905029   | 14.838311568 | 9.332770632  | 0 | 0 | 0 | # | ao |
| 1243 | 1 | 1 | 1.575000  | 7.764844971   | 16.343538432 | 9.332229368  | 0 | 0 | 0 | # | ao |
| 1244 | 1 | 1 | 1.575000  | 10.353194971  | 11.888988432 | 9.332229368  | 0 | 0 | 0 | # | ao |
| 1245 | 1 | 2 | 0.425000  | 8.911350872   | 13.366367322 | 10.818615063 | 0 | 0 | 0 | # | ho |
| 1246 | 1 | 2 | 0.425000  | 6.323000872   | 8.911817322  | 10.818615063 | 0 | 0 | 0 | # | ho |
| 1247 | 1 | 2 | 0.425000  | 6.618749128   | 13.360932678 | 7.846384937  | 0 | 0 | 0 | # | ho |
| 1248 | 1 | 2 | 0.425000  | 9.207099128   | 17.815482678 | 7.846384937  | 0 | 0 | 0 | # | ho |
| 1249 | 1 | 3 | -1.050000 | 6.158014655   | 10.586601481 | 8.299077932  | 0 | 0 | 0 | # | ob |
| 1250 | 1 | 3 | -1.050000 | 10.200217264  | 15.214196126 | 6.100653738  | 0 | 0 | 0 | # | ob |
| 1251 | 1 | 3 | -1.050000 | 8.746944487   | 11.682749320 | 8.298868622  | 0 | 0 | 0 | # | ob |
| 1252 | 1 | 3 | -1.050000 | 7.611539092   | 15.957810300 | 6.099420289  | 0 | 0 | 0 | # | ob |
| 1253 | 1 | 3 | -1.050000 | 6.158594487   | 16.137299320 | 8.298868622  | 0 | 0 | 0 | # | ob |
| 1254 | 1 | 3 | -1.050000 | 6.783155513   | 15.044550680 | 10.366131378 | 0 | 0 | 0 | # | ob |
| 1255 | 1 | 3 | -1.050000 | 10.199899092  | 11.503260300 | 6.099420289  | 0 | 0 | 0 | # | ob |
| 1256 | 1 | 3 | -1.050000 | 6.783735345   | 11.686148519 | 10.365922068 | 0 | 0 | 0 | # | ob |
| 1257 | 1 | 3 | -1.050000 | 7.918232736   | 15.967653874 | 12.564346262 | 0 | 0 | 0 | # | ob |
| 1258 | 1 | 3 | -1.050000 | 9.372085345   | 16.140698519 | 10.365922068 | 0 | 0 | 0 | # | ob |
| 1259 | 1 | 3 | -1.050000 | 5.329882736   | 11.513103874 | 12.564346262 | 0 | 0 | 0 | # | ob |
| 1260 | 1 | 3 | -1.050000 | 7.918560908   | 10.769489700 | 12.565579711 | 0 | 0 | 0 | # | ob |
| 1261 | 1 | 4 | -0.950000 | 7.175957657   | 8.910040996  | 10.345082885 | 0 | 0 | 0 | # | oh |
| 1262 | 1 | 3 | -1.050000 | 9.843781651   | 8.913076970  | 12.393982417 | 0 | 0 | 0 | # | ob |
| 1263 | 1 | 4 | -0.950000 | 9.764307657   | 13.364590996 | 10.345082885 | 0 | 0 | 0 | # | oh |
| 1264 | 1 | 3 | -1.050000 | 7.255431651   | 13.367626970 | 12.393982417 | 0 | 0 | 0 | # | ob |
| 1265 | 1 | 4 | -0.950000 | 8.354142343   | 17.817259004 | 8.319917115  | 0 | 0 | 0 | # | oh |
| 1266 | 1 | 3 | -1.050000 | 5.686318349   | 17.814223030 | 6.271017583  | 0 | 0 | 0 | # | ob |
| 1267 | 1 | 4 | -0.950000 | 5.765792343   | 13.362709004 | 8.319917115  | 0 | 0 | 0 | # | oh |
| 1268 | 1 | 3 | -1.050000 | 8.274668349   | 13.359673030 | 6.271017583  | 0 | 0 | 0 | # | ob |
| 1269 | 1 | 3 | -1.050000 | 9.371505513   | 10.590000680 | 10.366131378 | 0 | 0 | 0 | # | ob |
| 1270 | 1 | 3 | -1.050000 | 5.330210908   | 15.224039700 | 12.565579711 | 0 | 0 | 0 | # | ob |
| 1271 | 1 | 3 | -1.050000 | 8.746364655   | 15.041151481 | 8.299077932  | 0 | 0 | 0 | # | ob |
| 1272 | 1 | 3 | -1.050000 | 7.611867264   | 10.759646126 | 6.100653738  | 0 | 0 | 0 | # | ob |
| 1273 | 1 | 5 | 2.100000  | 9.399697014   | 10.436219204 | 11.995277170 | 0 | 0 | 0 | # | st |
| 1274 | 1 | 5 | 2.100000  | 8.718727774   | 14.882470782 | 6.670701903  | 0 | 0 | 0 | # | st |
| 1275 | 1 | 5 | 2.100000  | 6.130402986   | 16.291080796 | 6.669722830  | 0 | 0 | 0 | # | st |
| 1276 | 1 | 5 | 2.100000  | 8.718752986   | 11.836530796 | 6.669722830  | 0 | 0 | 0 | # | st |
| 1277 | 1 | 5 | 2.100000  | 9.399722226   | 16.299379218 | 11.994298097 | 0 | 0 | 0 | # | st |
| 1278 | 1 | 5 | 2.100000  | 6.811372226   | 11.844829218 | 11.994298097 | 0 | 0 | 0 | # | st |
| 1279 | 1 | 5 | 2.100000  | 6.811347014   | 14.890769204 | 11.995277170 | 0 | 0 | 0 | # | st |
| 1280 | 1 | 5 | 2.100000  | 6.130377774   | 10.427920782 | 6.670701903  | 0 | 0 | 0 | # | st |
| 1281 | 1 | 1 | 1.575000  | 12.941955029  | 10.383761568 | 9.332770632  | 0 | 0 | 0 | # | ao |
| 1282 | 1 | 1 | 1.575000  | 10.353605029  | 14.838311568 | 9.332770632  | 0 | 0 | 0 | # | ao |
| 1283 | 1 | 1 | 1.575000  | 12.941544971  | 16.343538432 | 9.332229368  | 0 | 0 | 0 | # | ao |
| 1284 | 1 | 1 | 1.575000  | 15.529894971  | 11.888988432 | 9.332229368  | 0 | 0 | 0 | # | ao |
| 1285 | 1 | 2 | 0.425000  | 14.088050872  | 13.366367322 | 10.818615063 | 0 | 0 | 0 | # | ho |
| 1286 | 1 | 2 | 0.425000  | 11.499700872  | 8.911817322  | 10.818615063 | 0 | 0 | 0 | # | ho |
| 1287 | 1 | 2 | 0.425000  | 11.795449128  | 13.360932678 | 7.846384937  | 0 | 0 | 0 | # | ho |
| 1288 | 1 | 2 | 0.425000  | 14.383799128  | 17.815482678 | 7.846384937  | 0 | 0 | 0 | # | ho |
| 1289 | 1 | 3 | -1.050000 | 11.334714655  | 10.586601481 | 8.299077932  | 0 | 0 | 0 | # | ob |
| 1290 | 1 | 3 | -1.050000 | 15.376917264  | 15.214196126 | 6.100653738  | 0 | 0 | 0 | # | ob |
| 1291 | 1 | 3 | -1.050000 | 13.923644487  | 11.682749320 | 8.298868622  | 0 | 0 | 0 | # | ob |
| 1292 | 1 | 3 | -1.050000 | 12.788239092  | 15.957810300 | 6.099420289  | 0 | 0 | 0 | # | ob |
| 1293 | 1 | 3 | -1.050000 | 11.335294487  | 16.137299320 | 8.298868622  | 0 | 0 | 0 | # | ob |
| 1294 | 1 | 3 | -1.050000 | 11.959855513  | 15.044550680 | 10.366131378 | 0 | 0 | 0 | # | ob |
| 1295 | 1 | 3 | -1.050000 | 15.376589092  | 11.503260300 | 6.099420289  | 0 | 0 | 0 | # | ob |
| 1296 | 1 | 3 | -1.050000 | 11.960435345  | 11.686148519 | 10.365922068 | 0 | 0 | 0 | # | ob |
| 1297 | 1 | 3 | -1.050000 | 13.094932736  | 15.967653874 | 12.564346262 | 0 | 0 | 0 | # | ob |
| 1298 | 1 | 3 | -1.050000 | 14.548785345  | 16.140698519 | 10.365922068 | 0 | 0 | 0 | # | ob |
| 1299 | 1 | 3 | -1.050000 | 10.506582736  | 11.513103874 | 12.564346262 | 0 | 0 | 0 | # | ob |
| 1300 | 1 | 3 | -1.050000 | 13.095260908  | 10.769489700 | 12.565579711 | 0 | 0 | 0 | # | ob |
| 1301 | 1 | 4 | -0.950000 | 12.352657657  | 8.910040996  | 10.345082885 | 0 | 0 | 0 | # | oh |
| 1302 | 1 | 3 | -1.050000 | 15.020481651  | 8.913076970  | 12.393982417 | 0 | 0 | 0 | # | ob |
| 1303 | 1 | 4 | -0.950000 | 14.941007657  | 13.364590996 | 10.345082885 | 0 | 0 | 0 | # | oh |
| 1304 | 1 | 3 | -1.050000 | 12.432131651  | 13.367626970 | 12.393982417 | 0 | 0 | 0 | # | ob |
| 1305 | 1 | 4 | -0.950000 | 13.530842343  | 17.817259004 | 8.319917115  | 0 | 0 | 0 | # | oh |
| 1306 | 1 | 3 | -1.050000 | 10.863018349  | 17.814223030 | 6.271017583  | 0 | 0 | 0 | # | ob |
| 1307 | 1 | 4 | -0.950000 | 10.942492343  | 13.362709004 | 8.319917115  | 0 | 0 | 0 | # | oh |
| 1308 | 1 | 3 | -1.050000 | 13.451368349  | 13.359673030 | 6.271017583  | 0 | 0 | 0 | # | ob |
| 1309 | 1 | 3 | -1.050000 | 14.548205513  | 10.590000680 | 10.366131378 | 0 | 0 | 0 | # | ob |
| 1310 | 1 | 3 | -1.050000 | 10.506910908  | 15.224039700 | 12.565579711 | 0 | 0 | 0 | # | ob |
| 1311 | 1 | 3 | -1.050000 | 13.923064655  | 15.041151481 | 8.299077932  | 0 | 0 | 0 | # | ob |
| 1312 | 1 | 3 | -1.050000 | 12.788567264  | 10.759646126 | 6.100653738  | 0 | 0 | 0 | # | ob |
| 1313 | 1 | 5 | 2.100000  | 14.576397014  | 10.436219204 | 11.995277170 | 0 | 0 | 0 | # | st |
| 1314 | 1 | 5 | 2.100000  | 13.895427774  | 14.882470782 | 6.670701903  | 0 | 0 | 0 | # | st |
| 1315 | 1 | 5 | 2.100000  | 11.307102986  | 16.291080796 | 6.669722830  | 0 | 0 | 0 | # | st |
| 1316 | 1 | 5 | 2.100000  | 13.895452986  | 11.836530796 | 6.669722830  | 0 | 0 | 0 | # | st |
| 1317 | 1 | 5 | 2.100000  | 14.576422226  | 16.299379218 | 11.994298097 | 0 | 0 | 0 | # | st |
| 1318 | 1 | 5 | 2.100000  | 11.988072226  | 11.844829218 | 11.994298097 | 0 | 0 | 0 | # | st |
| 1319 | 1 | 5 | 2.100000  | 11.988047014  | 14.890769204 | 11.995277170 | 0 | 0 | 0 | # | st |
| 1320 | 1 | 5 | 2.100000  | 11.307077774  | 10.427920782 | 6.670701903  | 0 | 0 | 0 | # | st |
| 1321 | 1 | 1 | 1.575000  | -12.941544971 | 10.383761568 | 9.332770632  | 1 | 0 | 0 | # | ao |
| 1322 | 1 | 1 | 1.575000  | -15.529894971 | 14.838311568 | 9.332770632  | 1 | 0 | 0 | # | ao |
| 1323 | 1 | 1 | 1.575000  | -12.941955029 | 16.343538432 | 9.332229368  | 1 | 0 | 0 | # | ao |
| 1324 | 1 | 1 | 1.575000  | -10.353605029 | 11.888988432 | 9.332229368  | 1 | 0 | 0 | # | ao |
| 1325 | 1 | 2 | 0.425000  | -11.795449128 | 13.366367322 | 10.818615063 | 1 | 0 | 0 | # | ho |
| 1326 | 1 | 2 | 0.425000  | -14.383799128 | 8.911817322  | 10.818615063 | 1 | 0 | 0 | # | ho |
| 1327 | 1 | 2 | 0.425000  | -14.088050872 | 13.360932678 | 7.846384937  | 1 | 0 | 0 | # | ho |
| 1328 | 1 | 2 | 0.425000  | -11.499700872 | 17.815482678 | 7.846384937  | 1 | 0 | 0 | # | ho |
| 1329 | 1 | 3 | -1.050000 | -14.548785345 | 10.586601481 | 8.299077932  | 1 | 0 | 0 | # | ob |

|      |   |   |           |               |              |              |   |   |   |    |
|------|---|---|-----------|---------------|--------------|--------------|---|---|---|----|
| 1330 | 1 | 3 | -1.050000 | -10.506582736 | 15.214196126 | 6.100653738  | 1 | 0 | 0 | ob |
| 1331 | 1 | 3 | -1.050000 | -11.959855513 | 11.682749320 | 8.298868622  | 1 | 0 | 0 | ob |
| 1332 | 1 | 3 | -1.050000 | -13.095260908 | 15.957810300 | 6.099420289  | 1 | 0 | 0 | ob |
| 1333 | 1 | 3 | -1.050000 | -14.548205513 | 16.137299320 | 8.298868622  | 1 | 0 | 0 | ob |
| 1334 | 1 | 3 | -1.050000 | -13.923644487 | 15.044550680 | 10.366131378 | 1 | 0 | 0 | ob |
| 1335 | 1 | 3 | -1.050000 | -10.506910908 | 11.503260300 | 6.099420289  | 1 | 0 | 0 | ob |
| 1336 | 1 | 3 | -1.050000 | -13.923064655 | 11.686148519 | 10.365922068 | 1 | 0 | 0 | ob |
| 1337 | 1 | 3 | -1.050000 | -12.788567264 | 15.967653874 | 12.564346262 | 1 | 0 | 0 | ob |
| 1338 | 1 | 3 | -1.050000 | -11.334714655 | 16.140698519 | 10.365922068 | 1 | 0 | 0 | ob |
| 1339 | 1 | 3 | -1.050000 | -15.376917264 | 11.513103874 | 12.564346262 | 1 | 0 | 0 | ob |
| 1340 | 1 | 3 | -1.050000 | -12.788239092 | 10.769489700 | 12.565579711 | 1 | 0 | 0 | ob |
| 1341 | 1 | 4 | -0.950000 | -13.530842343 | 8.910040996  | 10.345082885 | 1 | 0 | 0 | oh |
| 1342 | 1 | 3 | -1.050000 | -10.863018349 | 8.913076970  | 12.393982417 | 1 | 0 | 0 | ob |
| 1343 | 1 | 4 | -0.950000 | -10.942492343 | 13.364590996 | 10.345082885 | 1 | 0 | 0 | oh |
| 1344 | 1 | 3 | -1.050000 | -13.451368349 | 13.367626970 | 12.393982417 | 1 | 0 | 0 | ob |
| 1345 | 1 | 4 | -0.950000 | -12.352657657 | 17.817259004 | 8.319917115  | 1 | 0 | 0 | oh |
| 1346 | 1 | 3 | -1.050000 | -15.020481651 | 17.814223030 | 6.271017583  | 1 | 0 | 0 | ob |
| 1347 | 1 | 4 | -0.950000 | -14.941007657 | 13.362709004 | 8.319917115  | 1 | 0 | 0 | oh |
| 1348 | 1 | 3 | -1.050000 | -12.432131651 | 13.359673030 | 6.271017583  | 1 | 0 | 0 | ob |
| 1349 | 1 | 3 | -1.050000 | -11.335294487 | 10.590000680 | 10.366131378 | 1 | 0 | 0 | ob |
| 1350 | 1 | 3 | -1.050000 | -15.376589092 | 15.224039700 | 12.565579711 | 1 | 0 | 0 | ob |
| 1351 | 1 | 3 | -1.050000 | -11.960435345 | 15.041151481 | 8.299077932  | 1 | 0 | 0 | ob |
| 1352 | 1 | 3 | -1.050000 | -13.094932736 | 10.759646126 | 6.100653738  | 1 | 0 | 0 | ob |
| 1353 | 1 | 5 | 2.100000  | -11.307102986 | 10.436219204 | 11.995277170 | 1 | 0 | 0 | st |
| 1354 | 1 | 5 | 2.100000  | -11.988072226 | 14.882470782 | 6.670701903  | 1 | 0 | 0 | st |
| 1355 | 1 | 5 | 2.100000  | -14.576397014 | 16.291080796 | 6.669722830  | 1 | 0 | 0 | st |
| 1356 | 1 | 5 | 2.100000  | -11.988047014 | 11.836530796 | 6.669722830  | 1 | 0 | 0 | st |
| 1357 | 1 | 5 | 2.100000  | -11.307077774 | 16.299379218 | 11.994298097 | 1 | 0 | 0 | st |
| 1358 | 1 | 5 | 2.100000  | -13.895427774 | 11.844829218 | 11.994298097 | 1 | 0 | 0 | st |
| 1359 | 1 | 5 | 2.100000  | -13.895452986 | 14.890769204 | 11.995277170 | 1 | 0 | 0 | st |
| 1360 | 1 | 5 | 2.100000  | -14.576422226 | 10.427920782 | 6.670701903  | 1 | 0 | 0 | st |
| 1361 | 1 | 1 | 1.575000  | -7.764844971  | 10.383761568 | 9.332770632  | 1 | 0 | 0 | ao |
| 1362 | 1 | 1 | 1.575000  | -10.353194971 | 14.838311568 | 9.332770632  | 1 | 0 | 0 | ao |
| 1363 | 1 | 1 | 1.575000  | -7.765255029  | 16.343538432 | 9.332229368  | 1 | 0 | 0 | ao |
| 1364 | 1 | 1 | 1.575000  | -5.176905029  | 11.888988432 | 9.332229368  | 1 | 0 | 0 | ao |
| 1365 | 1 | 2 | 0.425000  | -6.618749128  | 13.366367322 | 10.818615063 | 1 | 0 | 0 | ho |
| 1366 | 1 | 2 | 0.425000  | -9.207099128  | 8.911817322  | 10.818615063 | 1 | 0 | 0 | ho |
| 1367 | 1 | 2 | 0.425000  | -8.911350872  | 13.360932678 | 7.846384937  | 1 | 0 | 0 | ho |
| 1368 | 1 | 2 | 0.425000  | -6.323000872  | 17.815482678 | 7.846384937  | 1 | 0 | 0 | ho |
| 1369 | 1 | 3 | -1.050000 | -9.372085345  | 10.586601481 | 8.299077932  | 1 | 0 | 0 | ob |
| 1370 | 1 | 3 | -1.050000 | -5.329882736  | 15.214196126 | 6.100653738  | 1 | 0 | 0 | ob |
| 1371 | 1 | 3 | -1.050000 | -6.783155513  | 11.682749320 | 8.298868622  | 1 | 0 | 0 | ob |
| 1372 | 1 | 3 | -1.050000 | -7.918560908  | 15.957810300 | 6.099420289  | 1 | 0 | 0 | ob |
| 1373 | 1 | 3 | -1.050000 | -9.371505513  | 16.137299320 | 8.298868622  | 1 | 0 | 0 | ob |
| 1374 | 1 | 3 | -1.050000 | -8.746944487  | 15.044550680 | 10.366131378 | 1 | 0 | 0 | ob |
| 1375 | 1 | 3 | -1.050000 | -5.330210908  | 11.503260300 | 6.099420289  | 1 | 0 | 0 | ob |
| 1376 | 1 | 3 | -1.050000 | -8.746364655  | 11.686148519 | 10.365922068 | 1 | 0 | 0 | ob |
| 1377 | 1 | 3 | -1.050000 | -7.611867264  | 15.967653874 | 12.564346262 | 1 | 0 | 0 | ob |
| 1378 | 1 | 3 | -1.050000 | -6.158014655  | 16.140698519 | 10.365922068 | 1 | 0 | 0 | ob |
| 1379 | 1 | 3 | -1.050000 | -10.200217264 | 11.513103874 | 12.564346262 | 1 | 0 | 0 | ob |
| 1380 | 1 | 3 | -1.050000 | -7.611539092  | 10.769489700 | 12.565579711 | 1 | 0 | 0 | ob |
| 1381 | 1 | 4 | -0.950000 | -8.354142343  | 8.910040996  | 10.345082885 | 1 | 0 | 0 | oh |
| 1382 | 1 | 3 | -1.050000 | -5.686318349  | 8.913076970  | 12.393982417 | 1 | 0 | 0 | ob |
| 1383 | 1 | 4 | -0.950000 | -5.765792343  | 13.364590996 | 10.345082885 | 1 | 0 | 0 | oh |
| 1384 | 1 | 3 | -1.050000 | -8.274668349  | 13.367626970 | 12.393982417 | 1 | 0 | 0 | ob |
| 1385 | 1 | 4 | -0.950000 | -7.175957657  | 17.817259004 | 8.319917115  | 1 | 0 | 0 | oh |
| 1386 | 1 | 3 | -1.050000 | -9.843781651  | 17.814223030 | 6.271017583  | 1 | 0 | 0 | ob |
| 1387 | 1 | 4 | -0.950000 | -9.764307657  | 13.362709004 | 8.319917115  | 1 | 0 | 0 | oh |
| 1388 | 1 | 3 | -1.050000 | -7.255431651  | 13.359673030 | 6.271017583  | 1 | 0 | 0 | ob |
| 1389 | 1 | 3 | -1.050000 | -6.158594487  | 10.590000680 | 10.366131378 | 1 | 0 | 0 | ob |
| 1390 | 1 | 3 | -1.050000 | -10.199889092 | 15.224039700 | 12.565579711 | 1 | 0 | 0 | ob |
| 1391 | 1 | 3 | -1.050000 | -6.783735345  | 15.041151481 | 8.299077932  | 1 | 0 | 0 | ob |
| 1392 | 1 | 3 | -1.050000 | -7.918232736  | 10.759646126 | 6.100653738  | 1 | 0 | 0 | ob |
| 1393 | 1 | 5 | 2.100000  | -6.130402986  | 10.436219204 | 11.995277170 | 1 | 0 | 0 | st |
| 1394 | 1 | 5 | 2.100000  | -6.811372226  | 14.882470782 | 6.670701903  | 1 | 0 | 0 | st |
| 1395 | 1 | 5 | 2.100000  | -9.399697014  | 16.291080796 | 6.669722830  | 1 | 0 | 0 | st |
| 1396 | 1 | 5 | 2.100000  | -6.811347014  | 11.836530796 | 6.669722830  | 1 | 0 | 0 | st |
| 1397 | 1 | 5 | 2.100000  | -6.130377774  | 16.299379218 | 11.994298097 | 1 | 0 | 0 | st |
| 1398 | 1 | 5 | 2.100000  | -8.718727774  | 11.844829218 | 11.994298097 | 1 | 0 | 0 | st |
| 1399 | 1 | 5 | 2.100000  | -8.718752986  | 14.890769204 | 11.995277170 | 1 | 0 | 0 | st |
| 1400 | 1 | 5 | 2.100000  | -9.399722226  | 10.427920782 | 6.670701903  | 1 | 0 | 0 | st |
| 1401 | 1 | 1 | 1.575000  | -2.588144971  | 10.383761568 | 9.332770632  | 1 | 0 | 0 | ao |
| 1402 | 1 | 1 | 1.575000  | -5.176494971  | 14.838311568 | 9.332770632  | 1 | 0 | 0 | ao |
| 1403 | 1 | 1 | 1.575000  | -2.588555029  | 16.343538432 | 9.332229368  | 1 | 0 | 0 | ao |
| 1404 | 1 | 1 | 1.575000  | -0.000205029  | 11.888988432 | 9.332229368  | 1 | 0 | 0 | ao |
| 1405 | 1 | 2 | 0.425000  | -1.442049128  | 13.366367322 | 10.818615063 | 1 | 0 | 0 | ho |
| 1406 | 1 | 2 | 0.425000  | -4.030399128  | 8.911817322  | 10.818615063 | 1 | 0 | 0 | ho |
| 1407 | 1 | 2 | 0.425000  | -3.734650872  | 13.360932678 | 7.846384937  | 1 | 0 | 0 | ho |
| 1408 | 1 | 2 | 0.425000  | -1.146300872  | 17.815482678 | 7.846384937  | 1 | 0 | 0 | ho |
| 1409 | 1 | 3 | -1.050000 | -4.195385345  | 10.586601481 | 8.299077932  | 1 | 0 | 0 | ob |
| 1410 | 1 | 3 | -1.050000 | -0.153182736  | 15.214196126 | 6.100653738  | 1 | 0 | 0 | ob |
| 1411 | 1 | 3 | -1.050000 | -1.606455513  | 11.682749320 | 8.298868622  | 1 | 0 | 0 | ob |
| 1412 | 1 | 3 | -1.050000 | -2.741860908  | 15.957810300 | 6.099420289  | 1 | 0 | 0 | ob |
| 1413 | 1 | 3 | -1.050000 | -4.194805513  | 16.137299320 | 8.298868622  | 1 | 0 | 0 | ob |
| 1414 | 1 | 3 | -1.050000 | -3.570244487  | 15.044550680 | 10.366131378 | 1 | 0 | 0 | ob |
| 1415 | 1 | 3 | -1.050000 | -0.153510908  | 11.503260300 | 6.099420289  | 1 | 0 | 0 | ob |
| 1416 | 1 | 3 | -1.050000 | -3.569664655  | 11.686148519 | 10.365922068 | 1 | 0 | 0 | ob |
| 1417 | 1 | 3 | -1.050000 | -2.435167264  | 15.967653874 | 12.564346262 | 1 | 0 | 0 | ob |
| 1418 | 1 | 3 | -1.050000 | -0.981314655  | 16.140698519 | 10.365922068 | 1 | 0 | 0 | ob |
| 1419 | 1 | 3 | -1.050000 | -5.023517264  | 11.513103874 | 12.564346262 | 1 | 0 | 0 | ob |
| 1420 | 1 | 3 | -1.050000 | -2.434839092  | 10.769489700 | 12.565579711 | 1 | 0 | 0 | ob |
| 1421 | 1 | 4 | -0.950000 | -3.177442343  | 8.910040996  | 10.345082885 | 1 | 0 | 0 | oh |
| 1422 | 1 | 3 | -1.050000 | -0.509618349  | 8.913076970  | 12.393982417 | 1 | 0 | 0 | ob |

|      |   |   |           |              |               |              |   |   |   |    |
|------|---|---|-----------|--------------|---------------|--------------|---|---|---|----|
| 1423 | 1 | 4 | -0.950000 | -0.589092343 | 13.364590996  | 10.345082885 | 1 | 0 | 0 | oh |
| 1424 | 1 | 3 | -1.050000 | -3.097968349 | 13.367626970  | 12.393982417 | 1 | 0 | 0 | ob |
| 1425 | 1 | 4 | -0.950000 | -1.999257657 | 17.817259004  | 8.319917115  | 1 | 0 | 0 | oh |
| 1426 | 1 | 3 | -1.050000 | -4.667081651 | 17.814223030  | 6.271017583  | 1 | 0 | 0 | ob |
| 1427 | 1 | 4 | -0.950000 | -4.587607657 | 13.362709004  | 8.319917115  | 1 | 0 | 0 | oh |
| 1428 | 1 | 3 | -1.050000 | -2.078731651 | 13.359673030  | 6.271017583  | 1 | 0 | 0 | ob |
| 1429 | 1 | 3 | -1.050000 | -0.981894487 | 10.590000680  | 10.366131378 | 1 | 0 | 0 | ob |
| 1430 | 1 | 3 | -1.050000 | -5.023189092 | 15.224039700  | 12.565579711 | 1 | 0 | 0 | ob |
| 1431 | 1 | 3 | -1.050000 | -1.607035345 | 15.041151481  | 8.299077932  | 1 | 0 | 0 | ob |
| 1432 | 1 | 3 | -1.050000 | -2.741532736 | 10.759646126  | 6.100653738  | 1 | 0 | 0 | ob |
| 1433 | 1 | 5 | 2.100000  | -0.953702986 | 10.436219204  | 11.995277170 | 1 | 0 | 0 | st |
| 1434 | 1 | 5 | 2.100000  | -1.634672226 | 14.882470782  | 6.670701903  | 1 | 0 | 0 | st |
| 1435 | 1 | 5 | 2.100000  | -4.222997014 | 16.291080796  | 6.669722830  | 1 | 0 | 0 | st |
| 1436 | 1 | 5 | 2.100000  | -1.634647014 | 11.836530796  | 6.669722830  | 1 | 0 | 0 | st |
| 1437 | 1 | 5 | 2.100000  | -0.953677774 | 16.299379218  | 11.994298097 | 1 | 0 | 0 | st |
| 1438 | 1 | 5 | 2.100000  | -3.542027774 | 11.844829218  | 11.994298097 | 1 | 0 | 0 | st |
| 1439 | 1 | 5 | 2.100000  | -3.542052986 | 14.890769204  | 11.995277170 | 1 | 0 | 0 | st |
| 1440 | 1 | 5 | 2.100000  | -4.223022226 | 10.427920782  | 6.670701903  | 1 | 0 | 0 | st |
| 1441 | 1 | 1 | 1.575000  | 2.588555029  | -16.343538432 | 9.332770632  | 0 | 1 | 0 | ao |
| 1442 | 1 | 1 | 1.575000  | 0.00205029   | -11.888988432 | 9.332770632  | 0 | 1 | 0 | ao |
| 1443 | 1 | 1 | 1.575000  | 2.588144971  | -10.383761568 | 9.33229368   | 0 | 1 | 0 | ao |
| 1444 | 1 | 1 | 1.575000  | 5.176494971  | -14.838311568 | 9.33229368   | 0 | 1 | 0 | ao |
| 1445 | 1 | 2 | 0.425000  | 3.734650872  | -13.360932678 | 10.818615063 | 0 | 1 | 0 | ho |
| 1446 | 1 | 2 | 0.425000  | 1.146300872  | -17.815482678 | 10.818615063 | 0 | 1 | 0 | ho |
| 1447 | 1 | 2 | 0.425000  | 1.442049128  | -13.366367322 | 7.846384937  | 0 | 1 | 0 | ho |
| 1448 | 1 | 2 | 0.425000  | 4.030399128  | -8.911817322  | 7.846384937  | 0 | 1 | 0 | ho |
| 1449 | 1 | 3 | -1.050000 | 0.981314655  | -16.140698519 | 8.299077932  | 0 | 1 | 0 | ob |
| 1450 | 1 | 3 | -1.050000 | 5.023517264  | -11.513103874 | 6.100653738  | 0 | 1 | 0 | ob |
| 1451 | 1 | 3 | -1.050000 | 3.570244487  | -15.044550680 | 8.298868622  | 0 | 1 | 0 | ob |
| 1452 | 1 | 3 | -1.050000 | 2.434839092  | -10.769489700 | 6.099420289  | 0 | 1 | 0 | ob |
| 1453 | 1 | 3 | -1.050000 | 0.981894487  | -10.590000680 | 8.298868622  | 0 | 1 | 0 | ob |
| 1454 | 1 | 3 | -1.050000 | 1.606455513  | -11.682749320 | 10.366131378 | 0 | 1 | 0 | ob |
| 1455 | 1 | 3 | -1.050000 | 5.023189092  | -15.224039700 | 6.099420289  | 0 | 1 | 0 | ob |
| 1456 | 1 | 3 | -1.050000 | 1.607035345  | -15.041151481 | 10.365922068 | 0 | 1 | 0 | ob |
| 1457 | 1 | 3 | -1.050000 | 2.741532736  | -10.759646126 | 12.564346262 | 0 | 1 | 0 | ob |
| 1458 | 1 | 3 | -1.050000 | 4.195385345  | -10.586601481 | 10.365922068 | 0 | 1 | 0 | ob |
| 1459 | 1 | 3 | -1.050000 | 0.153182736  | -15.214196126 | 12.564346262 | 0 | 1 | 0 | ob |
| 1460 | 1 | 3 | -1.050000 | 2.741860908  | -15.957810300 | 12.565579711 | 0 | 1 | 0 | ob |
| 1461 | 1 | 4 | -0.950000 | 1.999257657  | -17.817259004 | 10.345082885 | 0 | 1 | 0 | oh |
| 1462 | 1 | 3 | -1.050000 | 4.667081651  | -17.814223030 | 12.393982417 | 0 | 1 | 0 | ob |
| 1463 | 1 | 4 | -0.950000 | 4.587607657  | -13.362709004 | 10.345082885 | 0 | 1 | 0 | oh |
| 1464 | 1 | 3 | -1.050000 | 2.078731651  | -13.359673030 | 12.393982417 | 0 | 1 | 0 | ob |
| 1465 | 1 | 4 | -0.950000 | 3.177442343  | -8.910040996  | 8.319917115  | 0 | 1 | 0 | oh |
| 1466 | 1 | 3 | -1.050000 | 0.509618349  | -8.913076970  | 6.271017583  | 0 | 1 | 0 | ob |
| 1467 | 1 | 4 | -0.950000 | 0.589092343  | -13.364590996 | 8.319917115  | 0 | 1 | 0 | oh |
| 1468 | 1 | 3 | -1.050000 | 3.097968349  | -13.367626970 | 6.271017583  | 0 | 1 | 0 | ob |
| 1469 | 1 | 3 | -1.050000 | 4.194805513  | -16.137299320 | 10.366131378 | 0 | 1 | 0 | ob |
| 1470 | 1 | 3 | -1.050000 | 0.153510908  | -11.503260300 | 12.565579711 | 0 | 1 | 0 | ob |
| 1471 | 1 | 3 | -1.050000 | 3.569664655  | -11.686148519 | 8.299077932  | 0 | 1 | 0 | ob |
| 1472 | 1 | 3 | -1.050000 | 2.435167264  | -15.967653874 | 6.100653738  | 0 | 1 | 0 | ob |
| 1473 | 1 | 5 | 2.100000  | 4.222997014  | -16.291080796 | 11.995277170 | 0 | 1 | 0 | st |
| 1474 | 1 | 5 | 2.100000  | 3.542027774  | -11.844829218 | 6.670701903  | 0 | 1 | 0 | st |
| 1475 | 1 | 5 | 2.100000  | 0.953702986  | -10.436219204 | 6.669722830  | 0 | 1 | 0 | st |
| 1476 | 1 | 5 | 2.100000  | 3.542052986  | -14.890769204 | 6.669722830  | 0 | 1 | 0 | st |
| 1477 | 1 | 5 | 2.100000  | 4.223022226  | -10.427920782 | 11.994298097 | 0 | 1 | 0 | st |
| 1478 | 1 | 5 | 2.100000  | 1.634672226  | -14.882470782 | 11.994298097 | 0 | 1 | 0 | st |
| 1479 | 1 | 5 | 2.100000  | 1.634647014  | -11.836530796 | 11.995277170 | 0 | 1 | 0 | st |
| 1480 | 1 | 5 | 2.100000  | 0.953677774  | -16.299379218 | 6.670701903  | 0 | 1 | 0 | st |
| 1481 | 1 | 1 | 1.575000  | 7.765255029  | -16.343538432 | 9.332770632  | 0 | 1 | 0 | ao |
| 1482 | 1 | 1 | 1.575000  | 5.176905029  | -11.888988432 | 9.332770632  | 0 | 1 | 0 | ao |
| 1483 | 1 | 1 | 1.575000  | 7.764844971  | -10.383761568 | 9.33229368   | 0 | 1 | 0 | ao |
| 1484 | 1 | 1 | 1.575000  | 10.353194971 | -14.838311568 | 9.33229368   | 0 | 1 | 0 | ao |
| 1485 | 1 | 2 | 0.425000  | 8.911350872  | -13.360932678 | 10.818615063 | 0 | 1 | 0 | ho |
| 1486 | 1 | 2 | 0.425000  | 6.323000872  | -17.815482678 | 10.818615063 | 0 | 1 | 0 | ho |
| 1487 | 1 | 2 | 0.425000  | 6.618749128  | -13.366367322 | 7.846384937  | 0 | 1 | 0 | ho |
| 1488 | 1 | 2 | 0.425000  | 9.207099128  | -8.911817322  | 7.846384937  | 0 | 1 | 0 | ho |
| 1489 | 1 | 3 | -1.050000 | 6.158014655  | -16.140698519 | 8.299077932  | 0 | 1 | 0 | ob |
| 1490 | 1 | 3 | -1.050000 | 10.200217264 | -11.513103874 | 6.100653738  | 0 | 1 | 0 | ob |
| 1491 | 1 | 3 | -1.050000 | 8.746944487  | -15.044550680 | 8.298868622  | 0 | 1 | 0 | ob |
| 1492 | 1 | 3 | -1.050000 | 7.611539092  | -10.769489700 | 6.099420289  | 0 | 1 | 0 | ob |
| 1493 | 1 | 3 | -1.050000 | 6.158594487  | -10.590000680 | 8.298868622  | 0 | 1 | 0 | ob |
| 1494 | 1 | 3 | -1.050000 | 6.783155513  | -11.682749320 | 10.366131378 | 0 | 1 | 0 | ob |
| 1495 | 1 | 3 | -1.050000 | 10.199889092 | -15.224039700 | 6.099420289  | 0 | 1 | 0 | ob |
| 1496 | 1 | 3 | -1.050000 | 6.783735345  | -15.041151481 | 10.365922068 | 0 | 1 | 0 | ob |
| 1497 | 1 | 3 | -1.050000 | 7.918232736  | -10.759646126 | 12.564346262 | 0 | 1 | 0 | ob |
| 1498 | 1 | 3 | -1.050000 | 9.372085345  | -10.586601481 | 10.365922068 | 0 | 1 | 0 | ob |
| 1499 | 1 | 3 | -1.050000 | 5.329882736  | -15.214196126 | 12.564346262 | 0 | 1 | 0 | ob |
| 1500 | 1 | 3 | -1.050000 | 7.918560908  | -15.957810300 | 12.565579711 | 0 | 1 | 0 | ob |
| 1501 | 1 | 4 | -0.950000 | 7.175957657  | -17.817259004 | 10.345082885 | 0 | 1 | 0 | oh |
| 1502 | 1 | 3 | -1.050000 | 9.843781651  | -17.814223030 | 12.393982417 | 0 | 1 | 0 | ob |
| 1503 | 1 | 4 | -0.950000 | 9.764307657  | -13.362709004 | 10.345082885 | 0 | 1 | 0 | oh |
| 1504 | 1 | 3 | -1.050000 | 7.255431651  | -13.359673030 | 12.393982417 | 0 | 1 | 0 | ob |
| 1505 | 1 | 4 | -0.950000 | 8.354142343  | -8.910040996  | 8.319917115  | 0 | 1 | 0 | oh |
| 1506 | 1 | 3 | -1.050000 | 5.686318349  | -8.913076970  | 6.271017583  | 0 | 1 | 0 | ob |
| 1507 | 1 | 4 | -0.950000 | 5.765792343  | -13.364590996 | 8.319917115  | 0 | 1 | 0 | oh |
| 1508 | 1 | 3 | -1.050000 | 8.274668349  | -13.367626970 | 6.271017583  | 0 | 1 | 0 | ob |
| 1509 | 1 | 3 | -1.050000 | 9.371505513  | -16.137299320 | 10.366131378 | 0 | 1 | 0 | ob |
| 1510 | 1 | 3 | -1.050000 | 5.330210908  | -11.503260300 | 12.565579711 | 0 | 1 | 0 | ob |
| 1511 | 1 | 3 | -1.050000 | 8.746364655  | -11.686148519 | 8.299077932  | 0 | 1 | 0 | ob |
| 1512 | 1 | 3 | -1.050000 | 7.611867264  | -15.967653874 | 6.100653738  | 0 | 1 | 0 | ob |
| 1513 | 1 | 5 | 2.100000  | 9.399697014  | -16.291080796 | 11.995277170 | 0 | 1 | 0 | st |
| 1514 | 1 | 5 | 2.100000  | 8.718727774  | -11.844829218 | 6.670701903  | 0 | 1 | 0 | st |
| 1515 | 1 | 5 | 2.100000  | 6.130402986  | -10.436219204 | 6.669722830  | 0 | 1 | 0 | st |



|      |   |   |           |               |               |              |   |   |   |   |    |
|------|---|---|-----------|---------------|---------------|--------------|---|---|---|---|----|
| 1516 | 1 | 5 | 2.100000  | 8.718752986   | -14.890769204 | 6.669722830  | 0 | 1 | 0 | # | st |
| 1517 | 1 | 5 | 2.100000  | 9.399722226   | -10.427920782 | 11.994298097 | 0 | 1 | 0 | # | st |
| 1518 | 1 | 5 | 2.100000  | 6.811372226   | -14.882470782 | 11.994298097 | 0 | 1 | 0 | # | st |
| 1519 | 1 | 5 | 2.100000  | 6.811347014   | -11.836530796 | 11.995277170 | 0 | 1 | 0 | # | st |
| 1520 | 1 | 5 | 2.100000  | 6.130377774   | -16.299379218 | 6.670701903  | 0 | 1 | 0 | # | st |
| 1521 | 1 | 1 | 1.575000  | 12.941955029  | -16.343538432 | 9.332770632  | 0 | 1 | 0 | # | ao |
| 1522 | 1 | 1 | 1.575000  | 10.353605029  | -11.888988432 | 9.332770632  | 0 | 1 | 0 | # | ao |
| 1523 | 1 | 1 | 1.575000  | 12.941544971  | -10.383761568 | 9.332229368  | 0 | 1 | 0 | # | ao |
| 1524 | 1 | 1 | 1.575000  | 15.529894971  | -14.838311568 | 9.332229368  | 0 | 1 | 0 | # | ao |
| 1525 | 1 | 2 | 0.425000  | 14.088050872  | -13.360932678 | 10.818615063 | 0 | 1 | 0 | # | ho |
| 1526 | 1 | 2 | 0.425000  | 11.499700872  | -17.815482678 | 10.818615063 | 0 | 1 | 0 | # | ho |
| 1527 | 1 | 2 | 0.425000  | 11.795449128  | -13.366367322 | 7.846384937  | 0 | 1 | 0 | # | ho |
| 1528 | 1 | 2 | 0.425000  | 14.383799128  | -8.911817322  | 7.846384937  | 0 | 1 | 0 | # | ho |
| 1529 | 1 | 3 | -1.050000 | 11.334714655  | -16.140698519 | 8.299077932  | 0 | 1 | 0 | # | ob |
| 1530 | 1 | 3 | -1.050000 | 15.376917264  | -11.513103874 | 6.100653738  | 0 | 1 | 0 | # | ob |
| 1531 | 1 | 3 | -1.050000 | 13.923644487  | -15.044550680 | 8.298868622  | 0 | 1 | 0 | # | ob |
| 1532 | 1 | 3 | -1.050000 | 12.788239092  | -10.769489700 | 6.099420289  | 0 | 1 | 0 | # | ob |
| 1533 | 1 | 3 | -1.050000 | 11.335294487  | -10.590000680 | 8.298868622  | 0 | 1 | 0 | # | ob |
| 1534 | 1 | 3 | -1.050000 | 11.959855513  | -11.682749320 | 10.366131378 | 0 | 1 | 0 | # | ob |
| 1535 | 1 | 3 | -1.050000 | 15.376589092  | -15.224039700 | 6.099420289  | 0 | 1 | 0 | # | ob |
| 1536 | 1 | 3 | -1.050000 | 11.960435345  | -15.041151481 | 10.365922068 | 0 | 1 | 0 | # | ob |
| 1537 | 1 | 3 | -1.050000 | 13.094932736  | -10.759646126 | 12.564346262 | 0 | 1 | 0 | # | ob |
| 1538 | 1 | 3 | -1.050000 | 14.548785345  | -10.586601481 | 10.365922068 | 0 | 1 | 0 | # | ob |
| 1539 | 1 | 3 | -1.050000 | 10.506582736  | -15.214196126 | 12.564346262 | 0 | 1 | 0 | # | ob |
| 1540 | 1 | 3 | -1.050000 | 13.095260908  | -15.957810300 | 12.565579711 | 0 | 1 | 0 | # | ob |
| 1541 | 1 | 4 | -0.950000 | 12.352657657  | -17.817259004 | 10.345082885 | 0 | 1 | 0 | # | oh |
| 1542 | 1 | 3 | -1.050000 | 15.020481651  | -17.814223030 | 12.393982417 | 0 | 1 | 0 | # | ob |
| 1543 | 1 | 4 | -0.950000 | 14.941007657  | -13.362709004 | 10.345082885 | 0 | 1 | 0 | # | oh |
| 1544 | 1 | 3 | -1.050000 | 12.432131651  | -13.359673030 | 12.393982417 | 0 | 1 | 0 | # | ob |
| 1545 | 1 | 4 | -0.950000 | 13.530842343  | -8.910040996  | 8.319917115  | 0 | 1 | 0 | # | oh |
| 1546 | 1 | 3 | -1.050000 | 10.863018349  | -8.913076970  | 6.271017583  | 0 | 1 | 0 | # | ob |
| 1547 | 1 | 4 | -0.950000 | 10.942492343  | -13.364590996 | 8.319917115  | 0 | 1 | 0 | # | oh |
| 1548 | 1 | 3 | -1.050000 | 13.451368349  | -13.367626970 | 6.271017583  | 0 | 1 | 0 | # | ob |
| 1549 | 1 | 3 | -1.050000 | 14.548205513  | -16.137299320 | 10.366131378 | 0 | 1 | 0 | # | ob |
| 1550 | 1 | 3 | -1.050000 | 10.506910908  | -11.503260300 | 12.565579711 | 0 | 1 | 0 | # | ob |
| 1551 | 1 | 3 | -1.050000 | 13.923064655  | -11.686148519 | 8.299077932  | 0 | 1 | 0 | # | ob |
| 1552 | 1 | 3 | -1.050000 | 12.788567264  | -15.967653874 | 6.100653738  | 0 | 1 | 0 | # | ob |
| 1553 | 1 | 5 | 2.100000  | 14.576397014  | -16.291080796 | 11.995277170 | 0 | 1 | 0 | # | st |
| 1554 | 1 | 5 | 2.100000  | 13.895427774  | -11.844829218 | 6.670701903  | 0 | 1 | 0 | # | st |
| 1555 | 1 | 5 | 2.100000  | 11.307102986  | -10.436219204 | 6.669722830  | 0 | 1 | 0 | # | st |
| 1556 | 1 | 5 | 2.100000  | 13.895452986  | -14.890769204 | 6.669722830  | 0 | 1 | 0 | # | st |
| 1557 | 1 | 5 | 2.100000  | 14.576422226  | -10.427920782 | 11.994298097 | 0 | 1 | 0 | # | st |
| 1558 | 1 | 5 | 2.100000  | 11.988072226  | -14.882470782 | 11.994298097 | 0 | 1 | 0 | # | st |
| 1559 | 1 | 5 | 2.100000  | 11.988047014  | -11.836530796 | 11.995277170 | 0 | 1 | 0 | # | st |
| 1560 | 1 | 5 | 2.100000  | 11.307077774  | -16.299379218 | 6.670701903  | 0 | 1 | 0 | # | st |
| 1561 | 1 | 1 | 1.575000  | -12.941544971 | -16.343538432 | 9.332770632  | 1 | 1 | 0 | # | ao |
| 1562 | 1 | 1 | 1.575000  | -15.529894971 | -11.888988432 | 9.332770632  | 1 | 1 | 0 | # | ao |
| 1563 | 1 | 1 | 1.575000  | -12.941955029 | -10.383761568 | 9.332229368  | 1 | 1 | 0 | # | ao |
| 1564 | 1 | 1 | 1.575000  | -10.353605029 | -14.838311568 | 9.332229368  | 1 | 1 | 0 | # | ao |
| 1565 | 1 | 2 | 0.425000  | -11.795449128 | -13.360932678 | 10.818615063 | 1 | 1 | 0 | # | ho |
| 1566 | 1 | 2 | 0.425000  | -14.383799128 | -17.815482678 | 10.818615063 | 1 | 1 | 0 | # | ho |
| 1567 | 1 | 2 | 0.425000  | -14.088050872 | -13.366367322 | 7.846384937  | 1 | 1 | 0 | # | ho |
| 1568 | 1 | 2 | 0.425000  | -11.499700872 | -8.911817322  | 7.846384937  | 1 | 1 | 0 | # | ho |
| 1569 | 1 | 3 | -1.050000 | -14.548785345 | -16.140698519 | 8.299077932  | 1 | 1 | 0 | # | ob |
| 1570 | 1 | 3 | -1.050000 | -10.506582736 | -11.513103874 | 6.100653738  | 1 | 1 | 0 | # | ob |
| 1571 | 1 | 3 | -1.050000 | -11.959855513 | -15.044550680 | 8.298868622  | 1 | 1 | 0 | # | ob |
| 1572 | 1 | 3 | -1.050000 | -13.095260908 | -10.769489700 | 6.099420289  | 1 | 1 | 0 | # | ob |
| 1573 | 1 | 3 | -1.050000 | -14.548205513 | -10.590000680 | 8.298868622  | 1 | 1 | 0 | # | ob |
| 1574 | 1 | 3 | -1.050000 | -13.923644487 | -11.682749320 | 10.366131378 | 1 | 1 | 0 | # | ob |
| 1575 | 1 | 3 | -1.050000 | -10.506910908 | -15.224039700 | 6.099420289  | 1 | 1 | 0 | # | ob |
| 1576 | 1 | 3 | -1.050000 | -13.923064655 | -15.041151481 | 10.365922068 | 1 | 1 | 0 | # | ob |
| 1577 | 1 | 3 | -1.050000 | -12.788567264 | -10.759646126 | 12.564346262 | 1 | 1 | 0 | # | ob |
| 1578 | 1 | 3 | -1.050000 | -11.334714655 | -10.586601481 | 10.365922068 | 1 | 1 | 0 | # | ob |
| 1579 | 1 | 3 | -1.050000 | -15.376917264 | -15.214196126 | 12.564346262 | 1 | 1 | 0 | # | ob |
| 1580 | 1 | 3 | -1.050000 | -12.788239092 | -15.957810300 | 12.565579711 | 1 | 1 | 0 | # | ob |
| 1581 | 1 | 4 | -0.950000 | -13.530842343 | -17.817259004 | 10.345082885 | 1 | 1 | 0 | # | oh |
| 1582 | 1 | 3 | -1.050000 | -10.863018349 | -17.814223030 | 12.393982417 | 1 | 1 | 0 | # | ob |
| 1583 | 1 | 4 | -0.950000 | -10.942492343 | -13.362709004 | 10.345082885 | 1 | 1 | 0 | # | oh |
| 1584 | 1 | 3 | -1.050000 | -13.451368349 | -13.359673030 | 12.393982417 | 1 | 1 | 0 | # | ob |
| 1585 | 1 | 4 | -0.950000 | -12.352657657 | -8.910040996  | 8.319917115  | 1 | 1 | 0 | # | oh |
| 1586 | 1 | 3 | -1.050000 | -15.020481651 | -8.913076970  | 6.271017583  | 1 | 1 | 0 | # | ob |
| 1587 | 1 | 4 | -0.950000 | -14.941007657 | -13.364590996 | 8.319917115  | 1 | 1 | 0 | # | oh |
| 1588 | 1 | 3 | -1.050000 | -12.432131651 | -13.367626970 | 6.271017583  | 1 | 1 | 0 | # | ob |
| 1589 | 1 | 3 | -1.050000 | -11.335294487 | -16.137299320 | 10.366131378 | 1 | 1 | 0 | # | ob |
| 1590 | 1 | 3 | -1.050000 | -15.376589092 | -11.503260300 | 12.565579711 | 1 | 1 | 0 | # | ob |
| 1591 | 1 | 3 | -1.050000 | -11.960435345 | -11.686148519 | 8.299077932  | 1 | 1 | 0 | # | ob |
| 1592 | 1 | 3 | -1.050000 | -13.094932736 | -15.967653874 | 6.100653738  | 1 | 1 | 0 | # | ob |
| 1593 | 1 | 5 | 2.100000  | -11.307102986 | -16.291080796 | 11.995277170 | 1 | 1 | 0 | # | st |
| 1594 | 1 | 5 | 2.100000  | -11.988072226 | -11.844829218 | 6.670701903  | 1 | 1 | 0 | # | st |
| 1595 | 1 | 5 | 2.100000  | -14.576397014 | -10.436219204 | 6.669722830  | 1 | 1 | 0 | # | st |
| 1596 | 1 | 5 | 2.100000  | -11.988047014 | -14.890769204 | 6.669722830  | 1 | 1 | 0 | # | st |
| 1597 | 1 | 5 | 2.100000  | -11.307077774 | -10.427920782 | 11.994298097 | 1 | 1 | 0 | # | st |
| 1598 | 1 | 5 | 2.100000  | -13.895427774 | -14.882470782 | 11.994298097 | 1 | 1 | 0 | # | st |
| 1599 | 1 | 5 | 2.100000  | -13.895452986 | -11.836530796 | 11.995277170 | 1 | 1 | 0 | # | st |
| 1600 | 1 | 5 | 2.100000  | -14.576422226 | -16.299379218 | 6.670701903  | 1 | 1 | 0 | # | st |
| 1601 | 1 | 1 | 1.575000  | -7.764844971  | -16.343538432 | 9.332770632  | 1 | 1 | 0 | # | ao |
| 1602 | 1 | 1 | 1.575000  | -10.353194971 | -11.888988432 | 9.332770632  | 1 | 1 | 0 | # | ao |
| 1603 | 1 | 1 | 1.575000  | -7.765255029  | -10.383761568 | 9.332229368  | 1 | 1 | 0 | # | ao |
| 1604 | 1 | 1 | 1.575000  | -5.176905029  | -14.838311568 | 9.332229368  | 1 | 1 | 0 | # | ao |
| 1605 | 1 | 2 | 0.425000  | -6.618749128  | -13.360932678 | 10.818615063 | 1 | 1 | 0 | # | ho |
| 1606 | 1 | 2 | 0.425000  | -9.207099128  | -17.815482678 | 10.818615063 | 1 | 1 | 0 | # | ho |
| 1607 | 1 | 2 | 0.425000  | -8.911350872  | -13.366367322 | 7.846384937  | 1 | 1 | 0 | # | ho |
| 1608 | 1 | 2 | 0.425000  | -6.323000872  | -8.911817322  | 7.846384937  | 1 | 1 | 0 | # | ho |

|      |   |   |           |               |               |              |   |   |   |   |    |
|------|---|---|-----------|---------------|---------------|--------------|---|---|---|---|----|
| 1609 | 1 | 3 | -1.050000 | -9.372085345  | -16.140698519 | 8.299077932  | 1 | 1 | 0 | # | ob |
| 1610 | 1 | 3 | -1.050000 | -5.329882736  | -11.513103874 | 6.100653738  | 1 | 1 | 0 | # | ob |
| 1611 | 1 | 3 | -1.050000 | -6.783155513  | -15.044550680 | 8.298868622  | 1 | 1 | 0 | # | ob |
| 1612 | 1 | 3 | -1.050000 | -7.918560908  | -10.769489700 | 6.099420289  | 1 | 1 | 0 | # | ob |
| 1613 | 1 | 3 | -1.050000 | -9.371505513  | -10.590000680 | 8.298868622  | 1 | 1 | 0 | # | ob |
| 1614 | 1 | 3 | -1.050000 | -8.746944487  | -11.682749320 | 10.366131378 | 1 | 1 | 0 | # | ob |
| 1615 | 1 | 3 | -1.050000 | -5.330210908  | -15.224039700 | 6.099420289  | 1 | 1 | 0 | # | ob |
| 1616 | 1 | 3 | -1.050000 | -8.746364655  | -15.041151481 | 10.365922068 | 1 | 1 | 0 | # | ob |
| 1617 | 1 | 3 | -1.050000 | -7.611867264  | -10.759646126 | 12.564346262 | 1 | 1 | 0 | # | ob |
| 1618 | 1 | 3 | -1.050000 | -6.158014655  | -10.586601481 | 10.365922068 | 1 | 1 | 0 | # | ob |
| 1619 | 1 | 3 | -1.050000 | -10.200217264 | -15.214196126 | 12.564346262 | 1 | 1 | 0 | # | ob |
| 1620 | 1 | 3 | -1.050000 | -7.611539092  | -15.957810300 | 12.565579711 | 1 | 1 | 0 | # | ob |
| 1621 | 1 | 4 | -0.950000 | -8.354142343  | -17.817259004 | 10.345082885 | 1 | 1 | 0 | # | oh |
| 1622 | 1 | 3 | -1.050000 | -5.686318349  | -17.814223030 | 12.393982417 | 1 | 1 | 0 | # | ob |
| 1623 | 1 | 4 | -0.950000 | -5.765792343  | -13.362709004 | 10.345082885 | 1 | 1 | 0 | # | oh |
| 1624 | 1 | 3 | -1.050000 | -8.274668349  | -13.359673030 | 12.393982417 | 1 | 1 | 0 | # | ob |
| 1625 | 1 | 4 | -0.950000 | -7.175957657  | -8.910040996  | 8.319917115  | 1 | 1 | 0 | # | oh |
| 1626 | 1 | 3 | -1.050000 | -9.843781651  | -8.913076970  | 6.271017583  | 1 | 1 | 0 | # | ob |
| 1627 | 1 | 4 | -0.950000 | -9.764307657  | -13.364590996 | 8.319917115  | 1 | 1 | 0 | # | oh |
| 1628 | 1 | 3 | -1.050000 | -7.255431651  | -13.367626970 | 6.271017583  | 1 | 1 | 0 | # | ob |
| 1629 | 1 | 3 | -1.050000 | -6.158594487  | -16.137299320 | 10.366131378 | 1 | 1 | 0 | # | ob |
| 1630 | 1 | 3 | -1.050000 | -10.199889092 | -11.503260300 | 12.565579711 | 1 | 1 | 0 | # | ob |
| 1631 | 1 | 3 | -1.050000 | -6.783735345  | -11.686148519 | 8.299077932  | 1 | 1 | 0 | # | ob |
| 1632 | 1 | 3 | -1.050000 | -7.918232736  | -15.967653874 | 6.100653738  | 1 | 1 | 0 | # | ob |
| 1633 | 1 | 5 | 2.100000  | -6.130402986  | -16.291080796 | 11.995277170 | 1 | 1 | 0 | # | st |
| 1634 | 1 | 5 | 2.100000  | -6.811372226  | -11.844829218 | 6.670701903  | 1 | 1 | 0 | # | st |
| 1635 | 1 | 5 | 2.100000  | -9.399697014  | -10.436219204 | 6.669722830  | 1 | 1 | 0 | # | st |
| 1636 | 1 | 5 | 2.100000  | -6.811347014  | -14.890769204 | 6.669722830  | 1 | 1 | 0 | # | st |
| 1637 | 1 | 5 | 2.100000  | -6.130377774  | -10.427920782 | 11.994298097 | 1 | 1 | 0 | # | st |
| 1638 | 1 | 5 | 2.100000  | -8.718727774  | -14.882470782 | 11.994298097 | 1 | 1 | 0 | # | st |
| 1639 | 1 | 5 | 2.100000  | -8.718752986  | -11.836530796 | 11.995277170 | 1 | 1 | 0 | # | st |
| 1640 | 1 | 5 | 2.100000  | -9.399722226  | -16.299379218 | 6.670701903  | 1 | 1 | 0 | # | st |
| 1641 | 1 | 1 | 1.575000  | -2.588144971  | -16.343538432 | 9.332770632  | 1 | 1 | 0 | # | ao |
| 1642 | 1 | 1 | 1.575000  | -5.176494971  | -11.888988432 | 9.332770632  | 1 | 1 | 0 | # | ao |
| 1643 | 1 | 1 | 1.575000  | -2.588555029  | -10.383761568 | 9.332229368  | 1 | 1 | 0 | # | ao |
| 1644 | 1 | 1 | 1.575000  | -0.000205029  | -14.838311568 | 9.332229368  | 1 | 1 | 0 | # | ao |
| 1645 | 1 | 2 | 0.425000  | -1.442049128  | -13.360932678 | 10.818615063 | 1 | 1 | 0 | # | ho |
| 1646 | 1 | 2 | 0.425000  | -4.030399128  | -17.815482678 | 10.818615063 | 1 | 1 | 0 | # | ho |
| 1647 | 1 | 2 | 0.425000  | -3.734650872  | -13.366367322 | 7.846384937  | 1 | 1 | 0 | # | ho |
| 1648 | 1 | 2 | 0.425000  | -1.146300872  | -8.911817322  | 7.846384937  | 1 | 1 | 0 | # | ho |
| 1649 | 1 | 3 | -1.050000 | -4.195385345  | -16.140698519 | 8.299077932  | 1 | 1 | 0 | # | ob |
| 1650 | 1 | 3 | -1.050000 | -0.153182736  | -11.513103874 | 6.100653738  | 1 | 1 | 0 | # | ob |
| 1651 | 1 | 3 | -1.050000 | -1.606455513  | -15.044550680 | 8.298868622  | 1 | 1 | 0 | # | ob |
| 1652 | 1 | 3 | -1.050000 | -2.741860908  | -10.769489700 | 6.099420289  | 1 | 1 | 0 | # | ob |
| 1653 | 1 | 3 | -1.050000 | -4.194805513  | -10.590000680 | 8.298868622  | 1 | 1 | 0 | # | ob |
| 1654 | 1 | 3 | -1.050000 | -3.570244487  | -11.682749320 | 10.366131378 | 1 | 1 | 0 | # | ob |
| 1655 | 1 | 3 | -1.050000 | -0.153510908  | -15.224039700 | 6.099420289  | 1 | 1 | 0 | # | ob |
| 1656 | 1 | 3 | -1.050000 | -3.569664655  | -15.041151481 | 10.365922068 | 1 | 1 | 0 | # | ob |
| 1657 | 1 | 3 | -1.050000 | -2.435167264  | -10.759646126 | 12.564346262 | 1 | 1 | 0 | # | ob |
| 1658 | 1 | 3 | -1.050000 | -0.981314655  | -10.586601481 | 10.365922068 | 1 | 1 | 0 | # | ob |
| 1659 | 1 | 3 | -1.050000 | -5.023517264  | -15.214196126 | 12.564346262 | 1 | 1 | 0 | # | ob |
| 1660 | 1 | 3 | -1.050000 | -2.434839092  | -15.957810300 | 12.565579711 | 1 | 1 | 0 | # | ob |
| 1661 | 1 | 4 | -0.950000 | -3.177442343  | -17.817259004 | 10.345082885 | 1 | 1 | 0 | # | oh |
| 1662 | 1 | 3 | -1.050000 | -0.509618349  | -17.814223030 | 12.393982417 | 1 | 1 | 0 | # | ob |
| 1663 | 1 | 4 | -0.950000 | -0.589092343  | -13.362709004 | 10.345082885 | 1 | 1 | 0 | # | oh |
| 1664 | 1 | 3 | -1.050000 | -3.097968349  | -13.359673030 | 12.393982417 | 1 | 1 | 0 | # | ob |
| 1665 | 1 | 4 | -0.950000 | -1.999257657  | -8.910040996  | 8.319917115  | 1 | 1 | 0 | # | oh |
| 1666 | 1 | 3 | -1.050000 | -4.667081651  | -8.913076970  | 6.271017583  | 1 | 1 | 0 | # | ob |
| 1667 | 1 | 4 | -0.950000 | -4.587607657  | -13.364590996 | 8.319917115  | 1 | 1 | 0 | # | oh |
| 1668 | 1 | 3 | -1.050000 | -2.078731651  | -13.367626970 | 6.271017583  | 1 | 1 | 0 | # | ob |
| 1669 | 1 | 3 | -1.050000 | -0.981894487  | -16.137299320 | 10.366131378 | 1 | 1 | 0 | # | ob |
| 1670 | 1 | 3 | -1.050000 | -5.023189092  | -11.503260300 | 12.565579711 | 1 | 1 | 0 | # | ob |
| 1671 | 1 | 3 | -1.050000 | -1.607035345  | -11.686148519 | 8.299077932  | 1 | 1 | 0 | # | ob |
| 1672 | 1 | 3 | -1.050000 | -2.741532736  | -15.967653874 | 6.100653738  | 1 | 1 | 0 | # | ob |
| 1673 | 1 | 5 | 2.100000  | -0.953702986  | -16.291080796 | 11.995277170 | 1 | 1 | 0 | # | st |
| 1674 | 1 | 5 | 2.100000  | -1.634672226  | -11.844829218 | 6.670701903  | 1 | 1 | 0 | # | st |
| 1675 | 1 | 5 | 2.100000  | -4.222997014  | -10.436219204 | 6.669722830  | 1 | 1 | 0 | # | st |
| 1676 | 1 | 5 | 2.100000  | -1.634647014  | -14.890769204 | 6.669722830  | 1 | 1 | 0 | # | st |
| 1677 | 1 | 5 | 2.100000  | -0.953677774  | -10.427920782 | 11.994298097 | 1 | 1 | 0 | # | st |
| 1678 | 1 | 5 | 2.100000  | -3.542027774  | -14.882470782 | 11.994298097 | 1 | 1 | 0 | # | st |
| 1679 | 1 | 5 | 2.100000  | -3.542052986  | -11.836530796 | 11.995277170 | 1 | 1 | 0 | # | st |
| 1680 | 1 | 5 | 2.100000  | -4.223022226  | -16.299379218 | 6.670701903  | 1 | 1 | 0 | # | st |
| 1681 | 1 | 1 | 1.575000  | 2.588555029   | -7.434438432  | 9.332770632  | 0 | 1 | 0 | # | ao |
| 1682 | 1 | 1 | 1.575000  | 0.000205029   | -2.979888432  | 9.332770632  | 0 | 1 | 0 | # | ao |
| 1683 | 1 | 1 | 1.575000  | 2.588144971   | -1.474661568  | 9.332229368  | 0 | 1 | 0 | # | ao |
| 1684 | 1 | 1 | 1.575000  | 5.176494971   | -5.929211568  | 9.332229368  | 0 | 1 | 0 | # | ao |
| 1685 | 1 | 2 | 0.425000  | 3.734650872   | -4.451832678  | 10.818615063 | 0 | 1 | 0 | # | ho |
| 1686 | 1 | 2 | 0.425000  | 1.146300872   | -8.906382678  | 10.818615063 | 0 | 1 | 0 | # | ho |
| 1687 | 1 | 2 | 0.425000  | 1.442049128   | -4.457267322  | 7.846384937  | 0 | 1 | 0 | # | ho |
| 1688 | 1 | 2 | 0.425000  | 4.030399128   | -0.002717322  | 7.846384937  | 0 | 1 | 0 | # | ho |
| 1689 | 1 | 3 | -1.050000 | 0.981314655   | -7.231598519  | 8.299077932  | 0 | 1 | 0 | # | ob |
| 1690 | 1 | 3 | -1.050000 | 5.023517264   | -2.604003874  | 6.100653738  | 0 | 1 | 0 | # | ob |
| 1691 | 1 | 3 | -1.050000 | 3.570244487   | -6.135450680  | 8.298868622  | 0 | 1 | 0 | # | ob |
| 1692 | 1 | 3 | -1.050000 | 2.434839092   | -1.860389700  | 6.099420289  | 0 | 1 | 0 | # | ob |
| 1693 | 1 | 3 | -1.050000 | 0.981894487   | -1.680900680  | 8.298868622  | 0 | 1 | 0 | # | ob |
| 1694 | 1 | 3 | -1.050000 | 1.606455513   | -2.773649320  | 10.366131378 | 0 | 1 | 0 | # | ob |
| 1695 | 1 | 3 | -1.050000 | 5.023189092   | -6.314939700  | 6.099420289  | 0 | 1 | 0 | # | ob |
| 1696 | 1 | 3 | -1.050000 | 1.607035345   | -6.132051481  | 10.365922068 | 0 | 1 | 0 | # | ob |
| 1697 | 1 | 3 | -1.050000 | 2.741532736   | -1.850546126  | 12.564346262 | 0 | 1 | 0 | # | ob |
| 1698 | 1 | 3 | -1.050000 | 4.195385345   | -1.677501481  | 10.365922068 | 0 | 1 | 0 | # | ob |
| 1699 | 1 | 3 | -1.050000 | 0.153182736   | -6.305096126  | 12.564346262 | 0 | 1 | 0 | # | ob |
| 1700 | 1 | 3 | -1.050000 | 2.741860908   | -7.048710300  | 12.565579711 | 0 | 1 | 0 | # | ob |
| 1701 | 1 | 4 | -0.950000 | 1.999257657   | -8.908159004  | 10.345082885 | 0 | 1 | 0 | # | oh |

|      |   |   |           |              |              |              |   |   |   |   |    |
|------|---|---|-----------|--------------|--------------|--------------|---|---|---|---|----|
| 1702 | 1 | 3 | -1.050000 | 4.667081651  | -8.905123030 | 12.393982417 | 0 | 1 | 0 | # | ob |
| 1703 | 1 | 4 | -0.950000 | 4.587607657  | -4.453609004 | 10.345082885 | 0 | 1 | 0 | # | oh |
| 1704 | 1 | 3 | -1.050000 | 2.078731651  | -4.450573030 | 12.393982417 | 0 | 1 | 0 | # | ob |
| 1705 | 1 | 4 | -0.950000 | 3.177442343  | -0.000940996 | 8.319917115  | 0 | 1 | 0 | # | oh |
| 1706 | 1 | 3 | -1.050000 | 0.509618349  | -0.003976970 | 6.271017583  | 0 | 1 | 0 | # | ob |
| 1707 | 1 | 4 | -0.950000 | 0.589092343  | -4.455490996 | 8.319917115  | 0 | 1 | 0 | # | oh |
| 1708 | 1 | 3 | -1.050000 | 3.097968349  | -4.458526970 | 6.271017583  | 0 | 1 | 0 | # | ob |
| 1709 | 1 | 3 | -1.050000 | 4.194805513  | -7.228199320 | 10.366131378 | 0 | 1 | 0 | # | ob |
| 1710 | 1 | 3 | -1.050000 | 0.153510908  | -2.594160300 | 12.565579711 | 0 | 1 | 0 | # | ob |
| 1711 | 1 | 3 | -1.050000 | 3.569664655  | -2.777048519 | 8.299077932  | 0 | 1 | 0 | # | ob |
| 1712 | 1 | 3 | -1.050000 | 2.435167264  | -7.058553874 | 6.100653738  | 0 | 1 | 0 | # | ob |
| 1713 | 1 | 5 | 2.100000  | 4.222997014  | -7.381980796 | 11.995277170 | 0 | 1 | 0 | # | st |
| 1714 | 1 | 5 | 2.100000  | 3.542027774  | -2.935729218 | 6.670701903  | 0 | 1 | 0 | # | st |
| 1715 | 1 | 5 | 2.100000  | 0.953702986  | -1.527119204 | 6.669722830  | 0 | 1 | 0 | # | st |
| 1716 | 1 | 5 | 2.100000  | 3.542052986  | -5.981669204 | 6.669722830  | 0 | 1 | 0 | # | st |
| 1717 | 1 | 5 | 2.100000  | 4.223022226  | -1.518820782 | 11.994298097 | 0 | 1 | 0 | # | st |
| 1718 | 1 | 5 | 2.100000  | 1.634672226  | -5.973370782 | 11.994298097 | 0 | 1 | 0 | # | st |
| 1719 | 1 | 5 | 2.100000  | 1.634647014  | -2.927430796 | 11.995277170 | 0 | 1 | 0 | # | st |
| 1720 | 1 | 5 | 2.100000  | 0.953677774  | -7.390279218 | 6.670701903  | 0 | 1 | 0 | # | st |
| 1721 | 1 | 1 | 1.575000  | 7.765255029  | -7.434438432 | 9.332770632  | 0 | 1 | 0 | # | ao |
| 1722 | 1 | 1 | 1.575000  | 5.176905029  | -2.979888432 | 9.332770632  | 0 | 1 | 0 | # | ao |
| 1723 | 1 | 1 | 1.575000  | 7.764844971  | -1.474661568 | 9.332229368  | 0 | 1 | 0 | # | ao |
| 1724 | 1 | 1 | 1.575000  | 10.353194971 | -5.929211568 | 9.332229368  | 0 | 1 | 0 | # | ao |
| 1725 | 1 | 2 | 0.425000  | 8.911350872  | -4.451832678 | 10.818615063 | 0 | 1 | 0 | # | ho |
| 1726 | 1 | 2 | 0.425000  | 6.323000872  | -8.906382678 | 10.818615063 | 0 | 1 | 0 | # | ho |
| 1727 | 1 | 2 | 0.425000  | 6.618749128  | -4.457267322 | 7.846384937  | 0 | 1 | 0 | # | ho |
| 1728 | 1 | 2 | 0.425000  | 9.207099128  | -0.002717322 | 7.846384937  | 0 | 1 | 0 | # | ho |
| 1729 | 1 | 3 | -1.050000 | 6.158014655  | -7.231598519 | 8.299077932  | 0 | 1 | 0 | # | ob |
| 1730 | 1 | 3 | -1.050000 | 10.200217264 | -2.604003874 | 6.100653738  | 0 | 1 | 0 | # | ob |
| 1731 | 1 | 3 | -1.050000 | 8.746944487  | -6.135450680 | 8.298868622  | 0 | 1 | 0 | # | ob |
| 1732 | 1 | 3 | -1.050000 | 7.611539092  | -1.860389700 | 6.099420289  | 0 | 1 | 0 | # | ob |
| 1733 | 1 | 3 | -1.050000 | 6.158594487  | -1.680900680 | 8.298868622  | 0 | 1 | 0 | # | ob |
| 1734 | 1 | 3 | -1.050000 | 6.783155513  | -2.773649320 | 10.366131378 | 0 | 1 | 0 | # | ob |
| 1735 | 1 | 3 | -1.050000 | 10.199889092 | -6.314939700 | 6.099420289  | 0 | 1 | 0 | # | ob |
| 1736 | 1 | 3 | -1.050000 | 6.783735345  | -6.132051481 | 10.365922068 | 0 | 1 | 0 | # | ob |
| 1737 | 1 | 3 | -1.050000 | 7.918232736  | -1.850546126 | 12.564346262 | 0 | 1 | 0 | # | ob |
| 1738 | 1 | 3 | -1.050000 | 9.372085345  | -1.677501481 | 10.365922068 | 0 | 1 | 0 | # | ob |
| 1739 | 1 | 3 | -1.050000 | 5.329882736  | -6.305096126 | 12.564346262 | 0 | 1 | 0 | # | ob |
| 1740 | 1 | 3 | -1.050000 | 7.918560908  | -7.048710300 | 12.565579711 | 0 | 1 | 0 | # | ob |
| 1741 | 1 | 4 | -0.950000 | 7.175957657  | -8.908159004 | 10.345082885 | 0 | 1 | 0 | # | oh |
| 1742 | 1 | 3 | -1.050000 | 9.843781651  | -8.905123030 | 12.393982417 | 0 | 1 | 0 | # | ob |
| 1743 | 1 | 4 | -0.950000 | 9.764307657  | -4.453609004 | 10.345082885 | 0 | 1 | 0 | # | oh |
| 1744 | 1 | 3 | -1.050000 | 7.255431651  | -4.450573030 | 12.393982417 | 0 | 1 | 0 | # | ob |
| 1745 | 1 | 4 | -0.950000 | 8.354142343  | -0.000940996 | 8.319917115  | 0 | 1 | 0 | # | oh |
| 1746 | 1 | 3 | -1.050000 | 5.686318349  | -0.003976970 | 6.271017583  | 0 | 1 | 0 | # | ob |
| 1747 | 1 | 4 | -0.950000 | 5.765792343  | -4.455490996 | 8.319917115  | 0 | 1 | 0 | # | oh |
| 1748 | 1 | 3 | -1.050000 | 8.274668349  | -4.458526970 | 6.271017583  | 0 | 1 | 0 | # | ob |
| 1749 | 1 | 3 | -1.050000 | 9.371505513  | -7.228199320 | 10.366131378 | 0 | 1 | 0 | # | ob |
| 1750 | 1 | 3 | -1.050000 | 5.330210908  | -2.594160300 | 12.565579711 | 0 | 1 | 0 | # | ob |
| 1751 | 1 | 3 | -1.050000 | 8.746364655  | -2.777048519 | 8.299077932  | 0 | 1 | 0 | # | ob |
| 1752 | 1 | 3 | -1.050000 | 7.611867264  | -7.058553874 | 6.100653738  | 0 | 1 | 0 | # | ob |
| 1753 | 1 | 5 | 2.100000  | 9.399697014  | -7.381980796 | 11.995277170 | 0 | 1 | 0 | # | st |
| 1754 | 1 | 5 | 2.100000  | 8.718727774  | -2.935729218 | 6.670701903  | 0 | 1 | 0 | # | st |
| 1755 | 1 | 5 | 2.100000  | 6.130402986  | -1.527119204 | 6.669722830  | 0 | 1 | 0 | # | st |
| 1756 | 1 | 5 | 2.100000  | 8.718752986  | -5.981669204 | 6.669722830  | 0 | 1 | 0 | # | st |
| 1757 | 1 | 5 | 2.100000  | 9.399722226  | -1.518820782 | 11.994298097 | 0 | 1 | 0 | # | st |
| 1758 | 1 | 5 | 2.100000  | 6.811372226  | -5.973370782 | 11.994298097 | 0 | 1 | 0 | # | st |
| 1759 | 1 | 5 | 2.100000  | 6.811347014  | -2.927430796 | 11.995277170 | 0 | 1 | 0 | # | st |
| 1760 | 1 | 5 | 2.100000  | 6.130377774  | -7.390279218 | 6.670701903  | 0 | 1 | 0 | # | st |
| 1761 | 1 | 1 | 1.575000  | 12.941955029 | -7.434438432 | 9.332770632  | 0 | 1 | 0 | # | ao |
| 1762 | 1 | 1 | 1.575000  | 10.353605029 | -2.979888432 | 9.332770632  | 0 | 1 | 0 | # | ao |
| 1763 | 1 | 1 | 1.575000  | 12.941544971 | -1.474661568 | 9.332229368  | 0 | 1 | 0 | # | ao |
| 1764 | 1 | 1 | 1.575000  | 15.529894971 | -5.929211568 | 9.332229368  | 0 | 1 | 0 | # | ao |
| 1765 | 1 | 2 | 0.425000  | 14.088050872 | -4.451832678 | 10.818615063 | 0 | 1 | 0 | # | ho |
| 1766 | 1 | 2 | 0.425000  | 11.499700872 | -8.906382678 | 10.818615063 | 0 | 1 | 0 | # | ho |
| 1767 | 1 | 2 | 0.425000  | 11.795449128 | -4.457267322 | 7.846384937  | 0 | 1 | 0 | # | ho |
| 1768 | 1 | 2 | 0.425000  | 14.383799128 | -0.002717322 | 7.846384937  | 0 | 1 | 0 | # | ho |
| 1769 | 1 | 3 | -1.050000 | 11.334714655 | -7.231598519 | 8.299077932  | 0 | 1 | 0 | # | ob |
| 1770 | 1 | 3 | -1.050000 | 15.376917264 | -2.604003874 | 6.100653738  | 0 | 1 | 0 | # | ob |
| 1771 | 1 | 3 | -1.050000 | 13.923644487 | -6.135450680 | 8.298868622  | 0 | 1 | 0 | # | ob |
| 1772 | 1 | 3 | -1.050000 | 12.788239092 | -1.860389700 | 6.099420289  | 0 | 1 | 0 | # | ob |
| 1773 | 1 | 3 | -1.050000 | 11.335294487 | -1.680900680 | 8.298868622  | 0 | 1 | 0 | # | ob |
| 1774 | 1 | 3 | -1.050000 | 11.959855513 | -2.773649320 | 10.366131378 | 0 | 1 | 0 | # | ob |
| 1775 | 1 | 3 | -1.050000 | 15.376589092 | -6.314939700 | 6.099420289  | 0 | 1 | 0 | # | ob |
| 1776 | 1 | 3 | -1.050000 | 11.960435345 | -6.132051481 | 10.365922068 | 0 | 1 | 0 | # | ob |
| 1777 | 1 | 3 | -1.050000 | 13.094932736 | -1.850546126 | 12.564346262 | 0 | 1 | 0 | # | ob |
| 1778 | 1 | 3 | -1.050000 | 14.548785345 | -1.677501481 | 10.365922068 | 0 | 1 | 0 | # | ob |
| 1779 | 1 | 3 | -1.050000 | 10.506582736 | -6.305096126 | 12.564346262 | 0 | 1 | 0 | # | ob |
| 1780 | 1 | 3 | -1.050000 | 13.095260908 | -7.048710300 | 12.565579711 | 0 | 1 | 0 | # | ob |
| 1781 | 1 | 4 | -0.950000 | 12.352657657 | -8.908159004 | 10.345082885 | 0 | 1 | 0 | # | oh |
| 1782 | 1 | 3 | -1.050000 | 15.020481651 | -8.905123030 | 12.393982417 | 0 | 1 | 0 | # | ob |
| 1783 | 1 | 4 | -0.950000 | 14.941007657 | -4.453609004 | 10.345082885 | 0 | 1 | 0 | # | oh |
| 1784 | 1 | 3 | -1.050000 | 12.432131651 | -4.450573030 | 12.393982417 | 0 | 1 | 0 | # | ob |
| 1785 | 1 | 4 | -0.950000 | 13.530842343 | -0.000940996 | 8.319917115  | 0 | 1 | 0 | # | oh |
| 1786 | 1 | 3 | -1.050000 | 10.863018349 | -0.003976970 | 6.271017583  | 0 | 1 | 0 | # | ob |
| 1787 | 1 | 4 | -0.950000 | 10.942492343 | -4.455490996 | 8.319917115  | 0 | 1 | 0 | # | oh |
| 1788 | 1 | 3 | -1.050000 | 13.451368349 | -4.458526970 | 6.271017583  | 0 | 1 | 0 | # | ob |
| 1789 | 1 | 3 | -1.050000 | 14.548205513 | -7.228199320 | 10.366131378 | 0 | 1 | 0 | # | ob |
| 1790 | 1 | 3 | -1.050000 | 10.506910908 | -2.594160300 | 12.565579711 | 0 | 1 | 0 | # | ob |
| 1791 | 1 | 3 | -1.050000 | 13.923064655 | -2.777048519 | 8.299077932  | 0 | 1 | 0 | # | ob |
| 1792 | 1 | 3 | -1.050000 | 12.788567264 | -7.058553874 | 6.100653738  | 0 | 1 | 0 | # | ob |
| 1793 | 1 | 5 | 2.100000  | 14.576397014 | -7.381980796 | 11.995277170 | 0 | 1 | 0 | # | st |
| 1794 | 1 | 5 | 2.100000  | 13.895427774 | -2.935729218 | 6.670701903  | 0 | 1 | 0 | # | st |

|      |   |   |           |               |              |              |   |   |   |   |    |
|------|---|---|-----------|---------------|--------------|--------------|---|---|---|---|----|
| 1795 | 1 | 5 | 2.100000  | 11.307102986  | -1.527119204 | 6.669722830  | 0 | 1 | 0 | # | st |
| 1796 | 1 | 5 | 2.100000  | 13.895452986  | -5.981669204 | 6.669722830  | 0 | 1 | 0 | # | st |
| 1797 | 1 | 5 | 2.100000  | 14.576422226  | -1.518820782 | 11.994298097 | 0 | 1 | 0 | # | st |
| 1798 | 1 | 5 | 2.100000  | 11.988072226  | -5.973370782 | 11.994298097 | 0 | 1 | 0 | # | st |
| 1799 | 1 | 5 | 2.100000  | 11.988047014  | -2.927430796 | 11.995277170 | 0 | 1 | 0 | # | st |
| 1800 | 1 | 5 | 2.100000  | 11.307077774  | -7.390279218 | 6.670701903  | 0 | 1 | 0 | # | st |
| 1801 | 1 | 1 | 1.575000  | -12.941544971 | -7.434438432 | 9.332770632  | 1 | 1 | 0 | # | ao |
| 1802 | 1 | 1 | 1.575000  | -15.529894971 | -2.979888432 | 9.332770632  | 1 | 1 | 0 | # | ao |
| 1803 | 1 | 1 | 1.575000  | -12.941955029 | -1.474661568 | 9.332229368  | 1 | 1 | 0 | # | ao |
| 1804 | 1 | 1 | 1.575000  | -10.353605029 | -5.929211568 | 9.332229368  | 1 | 1 | 0 | # | ao |
| 1805 | 1 | 2 | 0.425000  | -11.795449128 | -4.451832678 | 10.818615063 | 1 | 1 | 0 | # | ho |
| 1806 | 1 | 2 | 0.425000  | -14.383799128 | -8.906382678 | 10.818615063 | 1 | 1 | 0 | # | ho |
| 1807 | 1 | 2 | 0.425000  | -14.088050872 | -4.457267322 | 7.846384937  | 1 | 1 | 0 | # | ho |
| 1808 | 1 | 2 | 0.425000  | -11.499700872 | -0.002717322 | 7.846384937  | 1 | 1 | 0 | # | ho |
| 1809 | 1 | 3 | -1.050000 | -14.548785345 | -7.231598519 | 8.299077932  | 1 | 1 | 0 | # | ob |
| 1810 | 1 | 3 | -1.050000 | -10.506582736 | -2.604003874 | 6.100653738  | 1 | 1 | 0 | # | ob |
| 1811 | 1 | 3 | -1.050000 | -11.959855513 | -6.135450680 | 8.298868622  | 1 | 1 | 0 | # | ob |
| 1812 | 1 | 3 | -1.050000 | -13.095260908 | -1.860389700 | 6.099420289  | 1 | 1 | 0 | # | ob |
| 1813 | 1 | 3 | -1.050000 | -14.548205513 | -1.680900680 | 8.298868622  | 1 | 1 | 0 | # | ob |
| 1814 | 1 | 3 | -1.050000 | -13.923644487 | -2.773649320 | 10.366131378 | 1 | 1 | 0 | # | ob |
| 1815 | 1 | 3 | -1.050000 | -10.506910908 | -6.314939700 | 6.099420289  | 1 | 1 | 0 | # | ob |
| 1816 | 1 | 3 | -1.050000 | -13.923064655 | -6.132051481 | 10.365922068 | 1 | 1 | 0 | # | ob |
| 1817 | 1 | 3 | -1.050000 | -12.788567264 | -1.850546126 | 12.564346262 | 1 | 1 | 0 | # | ob |
| 1818 | 1 | 3 | -1.050000 | -11.334714655 | -1.677501481 | 10.365922068 | 1 | 1 | 0 | # | ob |
| 1819 | 1 | 3 | -1.050000 | -15.376917264 | -6.305096126 | 12.564346262 | 1 | 1 | 0 | # | ob |
| 1820 | 1 | 3 | -1.050000 | -12.788239092 | -7.048710300 | 12.565579711 | 1 | 1 | 0 | # | ob |
| 1821 | 1 | 4 | -0.950000 | -13.530842343 | -8.908159004 | 10.345082885 | 1 | 1 | 0 | # | oh |
| 1822 | 1 | 3 | -1.050000 | -10.863018349 | -8.905123030 | 12.393982417 | 1 | 1 | 0 | # | ob |
| 1823 | 1 | 4 | -0.950000 | -10.942492343 | -4.453609004 | 10.345082885 | 1 | 1 | 0 | # | oh |
| 1824 | 1 | 3 | -1.050000 | -13.451368349 | -4.450573030 | 12.393982417 | 1 | 1 | 0 | # | ob |
| 1825 | 1 | 4 | -0.950000 | -12.352657657 | -0.000940996 | 8.319917115  | 1 | 1 | 0 | # | oh |
| 1826 | 1 | 3 | -1.050000 | -15.020481651 | -0.003976970 | 6.271017583  | 1 | 1 | 0 | # | ob |
| 1827 | 1 | 4 | -0.950000 | -14.941007657 | -4.455490996 | 8.319917115  | 1 | 1 | 0 | # | oh |
| 1828 | 1 | 3 | -1.050000 | -12.432131651 | -4.458526970 | 6.271017583  | 1 | 1 | 0 | # | ob |
| 1829 | 1 | 3 | -1.050000 | -11.335294487 | -7.228199320 | 10.366131378 | 1 | 1 | 0 | # | ob |
| 1830 | 1 | 3 | -1.050000 | -15.376589092 | -2.594160300 | 12.565579711 | 1 | 1 | 0 | # | ob |
| 1831 | 1 | 3 | -1.050000 | -11.960435345 | -2.777048519 | 8.299077932  | 1 | 1 | 0 | # | ob |
| 1832 | 1 | 3 | -1.050000 | -13.094932736 | -7.058553874 | 6.100653738  | 1 | 1 | 0 | # | ob |
| 1833 | 1 | 5 | 2.100000  | -11.307102986 | -7.381980796 | 11.995277170 | 1 | 1 | 0 | # | st |
| 1834 | 1 | 5 | 2.100000  | -11.988072226 | -2.935729218 | 6.670701903  | 1 | 1 | 0 | # | st |
| 1835 | 1 | 5 | 2.100000  | -14.576397014 | -1.527119204 | 6.669722830  | 1 | 1 | 0 | # | st |
| 1836 | 1 | 5 | 2.100000  | -11.988047014 | -5.981669204 | 6.669722830  | 1 | 1 | 0 | # | st |
| 1837 | 1 | 5 | 2.100000  | -11.307077774 | -1.518820782 | 11.994298097 | 1 | 1 | 0 | # | st |
| 1838 | 1 | 5 | 2.100000  | -13.895427774 | -5.973370782 | 11.994298097 | 1 | 1 | 0 | # | st |
| 1839 | 1 | 5 | 2.100000  | -13.895452986 | -2.927430796 | 11.995277170 | 1 | 1 | 0 | # | st |
| 1840 | 1 | 5 | 2.100000  | -14.576422226 | -7.390279218 | 6.670701903  | 1 | 1 | 0 | # | st |
| 1841 | 1 | 1 | 1.575000  | -7.764844971  | -7.434438432 | 9.332770632  | 1 | 1 | 0 | # | ao |
| 1842 | 1 | 1 | 1.575000  | -10.353194971 | -2.979888432 | 9.332770632  | 1 | 1 | 0 | # | ao |
| 1843 | 1 | 1 | 1.575000  | -7.765255029  | -1.474661568 | 9.332229368  | 1 | 1 | 0 | # | ao |
| 1844 | 1 | 1 | 1.575000  | -5.176905029  | -5.929211568 | 9.332229368  | 1 | 1 | 0 | # | ao |
| 1845 | 1 | 2 | 0.425000  | -6.618749128  | -4.451832678 | 10.818615063 | 1 | 1 | 0 | # | ho |
| 1846 | 1 | 2 | 0.425000  | -9.207099128  | -8.906382678 | 10.818615063 | 1 | 1 | 0 | # | ho |
| 1847 | 1 | 2 | 0.425000  | -8.911350872  | -4.457267322 | 7.846384937  | 1 | 1 | 0 | # | ho |
| 1848 | 1 | 2 | 0.425000  | -6.323000872  | -0.002717322 | 7.846384937  | 1 | 1 | 0 | # | ho |
| 1849 | 1 | 3 | -1.050000 | -9.372085345  | -7.231598519 | 8.299077932  | 1 | 1 | 0 | # | ob |
| 1850 | 1 | 3 | -1.050000 | -5.329882736  | -2.604003874 | 6.100653738  | 1 | 1 | 0 | # | ob |
| 1851 | 1 | 3 | -1.050000 | -6.783155513  | -6.135450680 | 8.298868622  | 1 | 1 | 0 | # | ob |
| 1852 | 1 | 3 | -1.050000 | -7.918560908  | -1.860389700 | 6.099420289  | 1 | 1 | 0 | # | ob |
| 1853 | 1 | 3 | -1.050000 | -9.371505513  | -1.680900680 | 8.298868622  | 1 | 1 | 0 | # | ob |
| 1854 | 1 | 3 | -1.050000 | -8.746944487  | -2.773649320 | 10.366131378 | 1 | 1 | 0 | # | ob |
| 1855 | 1 | 3 | -1.050000 | -5.330210908  | -6.314939700 | 6.099420289  | 1 | 1 | 0 | # | ob |
| 1856 | 1 | 3 | -1.050000 | -8.746364655  | -6.132051481 | 10.365922068 | 1 | 1 | 0 | # | ob |
| 1857 | 1 | 3 | -1.050000 | -7.611867264  | -1.850546126 | 12.564346262 | 1 | 1 | 0 | # | ob |
| 1858 | 1 | 3 | -1.050000 | -6.158014655  | -1.677501481 | 10.365922068 | 1 | 1 | 0 | # | ob |
| 1859 | 1 | 3 | -1.050000 | -10.200217264 | -6.305096126 | 12.564346262 | 1 | 1 | 0 | # | ob |
| 1860 | 1 | 3 | -1.050000 | -7.611539092  | -7.048710300 | 12.565579711 | 1 | 1 | 0 | # | ob |
| 1861 | 1 | 4 | -0.950000 | -8.354142343  | -8.908159004 | 10.345082885 | 1 | 1 | 0 | # | oh |
| 1862 | 1 | 3 | -1.050000 | -5.686318349  | -8.905123030 | 12.393982417 | 1 | 1 | 0 | # | ob |
| 1863 | 1 | 4 | -0.950000 | -5.765792343  | -4.453609004 | 10.345082885 | 1 | 1 | 0 | # | oh |
| 1864 | 1 | 3 | -1.050000 | -8.274668349  | -4.450573030 | 12.393982417 | 1 | 1 | 0 | # | ob |
| 1865 | 1 | 4 | -0.950000 | -7.175957657  | -0.000940996 | 8.319917115  | 1 | 1 | 0 | # | oh |
| 1866 | 1 | 3 | -1.050000 | -9.843781651  | -0.003976970 | 6.271017583  | 1 | 1 | 0 | # | ob |
| 1867 | 1 | 4 | -0.950000 | -9.764307657  | -4.455490996 | 8.319917115  | 1 | 1 | 0 | # | oh |
| 1868 | 1 | 3 | -1.050000 | -7.255431651  | -4.458526970 | 6.271017583  | 1 | 1 | 0 | # | ob |
| 1869 | 1 | 3 | -1.050000 | -6.158594487  | -7.228199320 | 10.366131378 | 1 | 1 | 0 | # | ob |
| 1870 | 1 | 3 | -1.050000 | -10.199889092 | -2.594160300 | 12.565579711 | 1 | 1 | 0 | # | ob |
| 1871 | 1 | 3 | -1.050000 | -6.783735345  | -2.777048519 | 8.299077932  | 1 | 1 | 0 | # | ob |
| 1872 | 1 | 3 | -1.050000 | -7.918232736  | -7.058553874 | 6.100653738  | 1 | 1 | 0 | # | ob |
| 1873 | 1 | 5 | 2.100000  | -6.130402986  | -7.381980796 | 11.995277170 | 1 | 1 | 0 | # | st |
| 1874 | 1 | 5 | 2.100000  | -6.811372226  | -2.935729218 | 6.670701903  | 1 | 1 | 0 | # | st |
| 1875 | 1 | 5 | 2.100000  | -9.399697014  | -1.527119204 | 6.669722830  | 1 | 1 | 0 | # | st |
| 1876 | 1 | 5 | 2.100000  | -6.811347014  | -5.981669204 | 6.669722830  | 1 | 1 | 0 | # | st |
| 1877 | 1 | 5 | 2.100000  | -6.130377774  | -1.518820782 | 11.994298097 | 1 | 1 | 0 | # | st |
| 1878 | 1 | 5 | 2.100000  | -8.718727774  | -5.973370782 | 11.994298097 | 1 | 1 | 0 | # | st |
| 1879 | 1 | 5 | 2.100000  | -8.718752986  | -2.927430796 | 11.995277170 | 1 | 1 | 0 | # | st |
| 1880 | 1 | 5 | 2.100000  | -9.399722226  | -7.390279218 | 6.670701903  | 1 | 1 | 0 | # | st |
| 1881 | 1 | 1 | 1.575000  | -2.588144971  | -7.434438432 | 9.332770632  | 1 | 1 | 0 | # | ao |
| 1882 | 1 | 1 | 1.575000  | -5.176494971  | -2.979888432 | 9.332770632  | 1 | 1 | 0 | # | ao |
| 1883 | 1 | 1 | 1.575000  | -2.588555029  | -1.474661568 | 9.332229368  | 1 | 1 | 0 | # | ao |
| 1884 | 1 | 1 | 1.575000  | -0.000205029  | -5.929211568 | 9.332229368  | 1 | 1 | 0 | # | ao |
| 1885 | 1 | 2 | 0.425000  | -1.442049128  | -4.451832678 | 10.818615063 | 1 | 1 | 0 | # | ho |
| 1886 | 1 | 2 | 0.425000  | -4.030399128  | -8.906382678 | 10.818615063 | 1 | 1 | 0 | # | ho |
| 1887 | 1 | 2 | 0.425000  | -3.734650872  | -4.457267322 | 7.846384937  | 1 | 1 | 0 | # | ho |

|      |   |   |           |              |              |               |   |   |   |   |    |
|------|---|---|-----------|--------------|--------------|---------------|---|---|---|---|----|
| 1888 | 1 | 2 | 0.425000  | -1.146300872 | -0.002717322 | 7.846384937   | 1 | 1 | 0 | # | ho |
| 1889 | 1 | 3 | -1.050000 | -4.195385345 | -7.231598519 | 8.299077932   | 1 | 1 | 0 | # | ob |
| 1890 | 1 | 3 | -1.050000 | -0.153182736 | -2.604003874 | 6.100653738   | 1 | 1 | 0 | # | ob |
| 1891 | 1 | 3 | -1.050000 | -1.606455513 | -6.135450680 | 8.298868622   | 1 | 1 | 0 | # | ob |
| 1892 | 1 | 3 | -1.050000 | -2.741860908 | -1.860389700 | 6.099420289   | 1 | 1 | 0 | # | ob |
| 1893 | 1 | 3 | -1.050000 | -4.194805513 | -1.680900680 | 8.298868622   | 1 | 1 | 0 | # | ob |
| 1894 | 1 | 3 | -1.050000 | -3.570244487 | -2.773649320 | 10.366131378  | 1 | 1 | 0 | # | ob |
| 1895 | 1 | 3 | -1.050000 | -0.153510908 | -6.314939700 | 6.099420289   | 1 | 1 | 0 | # | ob |
| 1896 | 1 | 3 | -1.050000 | -3.569664655 | -6.132051481 | 10.365922068  | 1 | 1 | 0 | # | ob |
| 1897 | 1 | 3 | -1.050000 | -2.435167264 | -1.850546126 | 12.564346262  | 1 | 1 | 0 | # | ob |
| 1898 | 1 | 3 | -1.050000 | -0.981314655 | -1.677501481 | 10.365922068  | 1 | 1 | 0 | # | ob |
| 1899 | 1 | 3 | -1.050000 | -5.023517264 | -6.305096126 | 12.564346262  | 1 | 1 | 0 | # | ob |
| 1900 | 1 | 3 | -1.050000 | -2.434839092 | -7.048710300 | 12.565579711  | 1 | 1 | 0 | # | ob |
| 1901 | 1 | 4 | -0.950000 | -3.177442343 | -8.908159004 | 10.345082885  | 1 | 1 | 0 | # | oh |
| 1902 | 1 | 3 | -1.050000 | -0.509618349 | -8.905123030 | 12.393982417  | 1 | 1 | 0 | # | ob |
| 1903 | 1 | 4 | -0.950000 | -0.589092343 | -4.453609004 | 10.345082885  | 1 | 1 | 0 | # | oh |
| 1904 | 1 | 3 | -1.050000 | -3.097968349 | -4.450573030 | 12.393982417  | 1 | 1 | 0 | # | ob |
| 1905 | 1 | 4 | -0.950000 | -1.999257657 | -0.000940996 | 8.319917115   | 1 | 1 | 0 | # | oh |
| 1906 | 1 | 3 | -1.050000 | -4.667081651 | -0.003976970 | 6.271017583   | 1 | 1 | 0 | # | ob |
| 1907 | 1 | 4 | -0.950000 | -4.587607657 | -4.455490996 | 8.319917115   | 1 | 1 | 0 | # | oh |
| 1908 | 1 | 3 | -1.050000 | -2.078731651 | -4.458526970 | 6.271017583   | 1 | 1 | 0 | # | ob |
| 1909 | 1 | 3 | -1.050000 | -0.981894487 | -7.228199320 | 10.366131378  | 1 | 1 | 0 | # | ob |
| 1910 | 1 | 3 | -1.050000 | -5.023189092 | -2.594160300 | 12.565579711  | 1 | 1 | 0 | # | ob |
| 1911 | 1 | 3 | -1.050000 | -1.607035345 | -2.777048519 | 8.299077932   | 1 | 1 | 0 | # | ob |
| 1912 | 1 | 3 | -1.050000 | -2.741532736 | -7.058553874 | 6.100653738   | 1 | 1 | 0 | # | ob |
| 1913 | 1 | 5 | 2.100000  | -0.953702986 | -7.381980796 | 11.995277170  | 1 | 1 | 0 | # | st |
| 1914 | 1 | 5 | 2.100000  | -1.634672226 | -2.935729218 | 6.670701903   | 1 | 1 | 0 | # | st |
| 1915 | 1 | 5 | 2.100000  | -4.222997014 | -1.527119204 | 6.669722830   | 1 | 1 | 0 | # | st |
| 1916 | 1 | 5 | 2.100000  | -1.634647014 | -5.981669204 | 6.669722830   | 1 | 1 | 0 | # | st |
| 1917 | 1 | 5 | 2.100000  | -0.953677774 | -1.518820782 | 11.994298097  | 1 | 1 | 0 | # | st |
| 1918 | 1 | 5 | 2.100000  | -3.542027774 | -5.973370782 | 11.994298097  | 1 | 1 | 0 | # | st |
| 1919 | 1 | 5 | 2.100000  | -3.542052986 | -2.927430796 | 11.995277170  | 1 | 1 | 0 | # | st |
| 1920 | 1 | 5 | 2.100000  | -4.223022226 | -7.390279218 | 6.670701903   | 1 | 1 | 0 | # | st |
| 1921 | 1 | 1 | 1.575000  | 2.588555029  | 1.474661568  | -18.664729368 | 0 | 0 | 1 | # | ao |
| 1922 | 1 | 1 | 1.575000  | 0.000205029  | 5.929211568  | -18.664729368 | 0 | 0 | 1 | # | ao |
| 1923 | 1 | 1 | 1.575000  | 2.588144971  | 7.434438432  | 18.664729368  | 0 | 0 | 0 | # | ao |
| 1924 | 1 | 1 | 1.575000  | 5.176494971  | 2.979888432  | 18.664729368  | 0 | 0 | 0 | # | ao |
| 1925 | 1 | 2 | 0.425000  | 3.734650872  | 4.457267322  | -17.178884937 | 0 | 0 | 1 | # | ho |
| 1926 | 1 | 2 | 0.425000  | 1.146300872  | 0.002717322  | -17.178884937 | 0 | 0 | 1 | # | ho |
| 1927 | 1 | 2 | 0.425000  | 1.442049128  | 4.451832678  | 17.178884937  | 0 | 0 | 0 | # | ho |
| 1928 | 1 | 2 | 0.425000  | 4.030399128  | 8.906382678  | 17.178884937  | 0 | 0 | 0 | # | ho |
| 1929 | 1 | 3 | -1.050000 | 0.981314655  | 1.677501481  | 17.631577932  | 0 | 0 | 0 | # | ob |
| 1930 | 1 | 3 | -1.050000 | 5.023517264  | 6.305096126  | 15.433153738  | 0 | 0 | 0 | # | ob |
| 1931 | 1 | 3 | -1.050000 | 3.570244487  | 2.773649320  | 17.631368622  | 0 | 0 | 0 | # | ob |
| 1932 | 1 | 3 | -1.050000 | 2.434839092  | 7.048710300  | 15.431920289  | 0 | 0 | 0 | # | ob |
| 1933 | 1 | 3 | -1.050000 | 0.981894487  | 7.228199320  | 17.631368622  | 0 | 0 | 0 | # | ob |
| 1934 | 1 | 3 | -1.050000 | 1.606455513  | 6.135450680  | -17.631368622 | 0 | 0 | 1 | # | ob |
| 1935 | 1 | 3 | -1.050000 | 5.023189092  | 2.594160300  | 15.431920289  | 0 | 0 | 0 | # | ob |
| 1936 | 1 | 3 | -1.050000 | 1.607035345  | 2.777048519  | -17.631577932 | 0 | 0 | 1 | # | ob |
| 1937 | 1 | 3 | -1.050000 | 2.741532736  | 7.058553874  | -15.433153738 | 0 | 0 | 1 | # | ob |
| 1938 | 1 | 3 | -1.050000 | 4.195385345  | 7.231598519  | -17.631577932 | 0 | 0 | 1 | # | ob |
| 1939 | 1 | 3 | -1.050000 | 0.153182736  | 2.604003874  | -15.433153738 | 0 | 0 | 1 | # | ob |
| 1940 | 1 | 3 | -1.050000 | 2.741860908  | 1.860389700  | -15.431920289 | 0 | 0 | 1 | # | ob |
| 1941 | 1 | 4 | -0.950000 | 1.999257657  | 0.000940996  | -17.652417115 | 0 | 0 | 1 | # | oh |
| 1942 | 1 | 3 | -1.050000 | 4.667081651  | 0.003976970  | -15.603517583 | 0 | 0 | 1 | # | ob |
| 1943 | 1 | 4 | -0.950000 | 4.587607657  | 4.455490996  | -17.652417115 | 0 | 0 | 1 | # | oh |
| 1944 | 1 | 3 | -1.050000 | 2.078731651  | 4.458526970  | -15.603517583 | 0 | 0 | 1 | # | ob |
| 1945 | 1 | 4 | -0.950000 | 3.177442343  | 8.908159004  | 17.652417115  | 0 | 0 | 0 | # | oh |
| 1946 | 1 | 3 | -1.050000 | 0.509618349  | 8.905123030  | 15.603517583  | 0 | 0 | 0 | # | ob |
| 1947 | 1 | 4 | -0.950000 | 0.589092343  | 4.453609004  | 17.652417115  | 0 | 0 | 0 | # | oh |
| 1948 | 1 | 3 | -1.050000 | 3.097968349  | 4.450573030  | 15.603517583  | 0 | 0 | 0 | # | ob |
| 1949 | 1 | 3 | -1.050000 | 4.194805513  | 1.680900680  | -17.631368622 | 0 | 0 | 1 | # | ob |
| 1950 | 1 | 3 | -1.050000 | 0.153510908  | 6.314939700  | -15.431920289 | 0 | 0 | 1 | # | ob |
| 1951 | 1 | 3 | -1.050000 | 3.569664655  | 6.132051481  | 17.631577932  | 0 | 0 | 0 | # | ob |
| 1952 | 1 | 3 | -1.050000 | 2.435167264  | 1.850546126  | 15.433153738  | 0 | 0 | 0 | # | ob |
| 1953 | 1 | 5 | 2.100000  | 4.222997014  | 1.527119204  | -16.002222830 | 0 | 0 | 1 | # | st |
| 1954 | 1 | 5 | 2.100000  | 3.542027774  | 5.973370782  | 16.003201903  | 0 | 0 | 0 | # | st |
| 1955 | 1 | 5 | 2.100000  | 0.953702986  | 7.381980796  | 16.002222830  | 0 | 0 | 0 | # | st |
| 1956 | 1 | 5 | 2.100000  | 3.542052986  | 2.927430796  | 16.002222830  | 0 | 0 | 0 | # | st |
| 1957 | 1 | 5 | 2.100000  | 4.223022226  | 7.390279218  | -16.003201903 | 0 | 0 | 1 | # | st |
| 1958 | 1 | 5 | 2.100000  | 1.634672226  | 2.935729218  | -16.003201903 | 0 | 0 | 1 | # | st |
| 1959 | 1 | 5 | 2.100000  | 1.634647014  | 5.981669204  | -16.002222830 | 0 | 0 | 1 | # | st |
| 1960 | 1 | 5 | 2.100000  | 0.953677774  | 1.518820782  | 16.003201903  | 0 | 0 | 0 | # | st |
| 1961 | 1 | 1 | 1.575000  | 7.765255029  | 1.474661568  | -18.664729368 | 0 | 0 | 1 | # | ao |
| 1962 | 1 | 1 | 1.575000  | 5.176905029  | 5.929211568  | -18.664729368 | 0 | 0 | 1 | # | ao |
| 1963 | 1 | 1 | 1.575000  | 7.764844971  | 7.434438432  | 18.664729368  | 0 | 0 | 0 | # | ao |
| 1964 | 1 | 1 | 1.575000  | 10.353194971 | 2.979888432  | 18.664729368  | 0 | 0 | 0 | # | ao |
| 1965 | 1 | 2 | 0.425000  | 8.911350872  | 4.457267322  | -17.178884937 | 0 | 0 | 1 | # | ho |
| 1966 | 1 | 2 | 0.425000  | 6.323000872  | 0.002717322  | -17.178884937 | 0 | 0 | 1 | # | ho |
| 1967 | 1 | 2 | 0.425000  | 6.618749128  | 4.451832678  | 17.178884937  | 0 | 0 | 0 | # | ho |
| 1968 | 1 | 2 | 0.425000  | 9.207099128  | 8.906382678  | 17.178884937  | 0 | 0 | 0 | # | ho |
| 1969 | 1 | 3 | -1.050000 | 6.158014655  | 1.677501481  | 17.631577932  | 0 | 0 | 0 | # | ob |
| 1970 | 1 | 3 | -1.050000 | 10.200217264 | 6.305096126  | 15.433153738  | 0 | 0 | 0 | # | ob |
| 1971 | 1 | 3 | -1.050000 | 8.746944487  | 2.773649320  | 17.631368622  | 0 | 0 | 0 | # | ob |
| 1972 | 1 | 3 | -1.050000 | 7.611539092  | 7.048710300  | 15.431920289  | 0 | 0 | 0 | # | ob |
| 1973 | 1 | 3 | -1.050000 | 6.158594487  | 7.228199320  | 17.631368622  | 0 | 0 | 0 | # | ob |
| 1974 | 1 | 3 | -1.050000 | 6.783155513  | 6.135450680  | -17.631368622 | 0 | 0 | 1 | # | ob |
| 1975 | 1 | 3 | -1.050000 | 10.199889092 | 2.594160300  | 15.431920289  | 0 | 0 | 0 | # | ob |
| 1976 | 1 | 3 | -1.050000 | 6.783735345  | 2.777048519  | -17.631577932 | 0 | 0 | 1 | # | ob |
| 1977 | 1 | 3 | -1.050000 | 7.918232736  | 7.058553874  | -15.433153738 | 0 | 0 | 1 | # | ob |
| 1978 | 1 | 3 | -1.050000 | 9.372085345  | 7.231598519  | -17.631577932 | 0 | 0 | 1 | # | ob |
| 1979 | 1 | 3 | -1.050000 | 5.329882736  | 2.604003874  | -15.433153738 | 0 | 0 | 1 | # | ob |
| 1980 | 1 | 3 | -1.050000 | 7.918560908  | 1.860389700  | -15.431920289 | 0 | 0 | 1 | # | ob |

|      |   |   |           |               |             |               |   |   |   |   |    |
|------|---|---|-----------|---------------|-------------|---------------|---|---|---|---|----|
| 1981 | 1 | 4 | -0.950000 | 7.175957657   | 0.000940996 | -17.652417115 | 0 | 0 | 1 | # | oh |
| 1982 | 1 | 3 | -1.050000 | 9.843781651   | 0.003976970 | -15.603517583 | 0 | 0 | 1 | # | ob |
| 1983 | 1 | 4 | -0.950000 | 9.764307657   | 4.455490996 | -17.652417115 | 0 | 0 | 1 | # | oh |
| 1984 | 1 | 3 | -1.050000 | 7.255431651   | 4.458526970 | -15.603517583 | 0 | 0 | 1 | # | ob |
| 1985 | 1 | 4 | -0.950000 | 8.354142343   | 8.908159004 | 17.652417115  | 0 | 0 | 0 | # | oh |
| 1986 | 1 | 3 | -1.050000 | 5.686318349   | 8.905123030 | 15.603517583  | 0 | 0 | 0 | # | ob |
| 1987 | 1 | 4 | -0.950000 | 5.765792343   | 4.453609004 | 17.652417115  | 0 | 0 | 0 | # | oh |
| 1988 | 1 | 3 | -1.050000 | 8.274668349   | 4.450573030 | 15.603517583  | 0 | 0 | 0 | # | ob |
| 1989 | 1 | 3 | -1.050000 | 9.371505513   | 1.680900680 | -17.631368622 | 0 | 0 | 1 | # | ob |
| 1990 | 1 | 3 | -1.050000 | 5.330210908   | 6.314939700 | -15.431920289 | 0 | 0 | 1 | # | ob |
| 1991 | 1 | 3 | -1.050000 | 8.746364655   | 6.132051481 | 17.631577932  | 0 | 0 | 0 | # | ob |
| 1992 | 1 | 3 | -1.050000 | 7.611867264   | 1.850546126 | 15.433153738  | 0 | 0 | 0 | # | ob |
| 1993 | 1 | 5 | 2.100000  | 9.399697014   | 1.527119204 | -16.002222830 | 0 | 0 | 1 | # | st |
| 1994 | 1 | 5 | 2.100000  | 8.718727774   | 5.973370782 | 16.003201903  | 0 | 0 | 0 | # | st |
| 1995 | 1 | 5 | 2.100000  | 6.130402986   | 7.381980796 | 16.002222830  | 0 | 0 | 0 | # | st |
| 1996 | 1 | 5 | 2.100000  | 8.718752986   | 2.927430796 | 16.002222830  | 0 | 0 | 0 | # | st |
| 1997 | 1 | 5 | 2.100000  | 9.399722226   | 7.390279218 | -16.003201903 | 0 | 0 | 1 | # | st |
| 1998 | 1 | 5 | 2.100000  | 6.811372226   | 2.935729218 | -16.003201903 | 0 | 0 | 1 | # | st |
| 1999 | 1 | 5 | 2.100000  | 6.811347014   | 5.981669204 | -16.002222830 | 0 | 0 | 1 | # | st |
| 2000 | 1 | 5 | 2.100000  | 6.130377774   | 1.518820782 | 16.003201903  | 0 | 0 | 0 | # | st |
| 2001 | 1 | 1 | 1.575000  | 12.941955029  | 1.474661568 | -18.664729368 | 0 | 0 | 1 | # | ao |
| 2002 | 1 | 1 | 1.575000  | 10.353605029  | 5.929211568 | -18.664729368 | 0 | 0 | 1 | # | ao |
| 2003 | 1 | 1 | 1.575000  | 12.941544971  | 7.434438432 | 18.664729368  | 0 | 0 | 0 | # | ao |
| 2004 | 1 | 1 | 1.575000  | 15.529894971  | 2.979888432 | 18.664729368  | 0 | 0 | 0 | # | ao |
| 2005 | 1 | 2 | 0.425000  | 14.088050872  | 4.457267322 | -17.178884937 | 0 | 0 | 1 | # | ho |
| 2006 | 1 | 2 | 0.425000  | 11.499700872  | 0.002717322 | -17.178884937 | 0 | 0 | 1 | # | ho |
| 2007 | 1 | 2 | 0.425000  | 11.795449128  | 4.451832678 | 17.178884937  | 0 | 0 | 0 | # | ho |
| 2008 | 1 | 2 | 0.425000  | 14.383799128  | 8.906382678 | 17.178884937  | 0 | 0 | 0 | # | ho |
| 2009 | 1 | 3 | -1.050000 | 11.334714655  | 1.677501481 | 17.631577932  | 0 | 0 | 0 | # | ob |
| 2010 | 1 | 3 | -1.050000 | 15.376917264  | 6.305096126 | 15.433153738  | 0 | 0 | 0 | # | ob |
| 2011 | 1 | 3 | -1.050000 | 13.923644487  | 2.773649320 | 17.631368622  | 0 | 0 | 0 | # | ob |
| 2012 | 1 | 3 | -1.050000 | 12.788239092  | 7.048710300 | 15.431920289  | 0 | 0 | 0 | # | ob |
| 2013 | 1 | 3 | -1.050000 | 11.335294487  | 7.228199320 | 17.631368622  | 0 | 0 | 0 | # | ob |
| 2014 | 1 | 3 | -1.050000 | 11.959855513  | 6.135450680 | -17.631368622 | 0 | 0 | 1 | # | ob |
| 2015 | 1 | 3 | -1.050000 | 15.376589092  | 2.594160300 | 15.431920289  | 0 | 0 | 0 | # | ob |
| 2016 | 1 | 3 | -1.050000 | 11.960435345  | 2.777048519 | -17.631577932 | 0 | 0 | 1 | # | ob |
| 2017 | 1 | 3 | -1.050000 | 13.094932736  | 7.058553874 | -15.433153738 | 0 | 0 | 1 | # | ob |
| 2018 | 1 | 3 | -1.050000 | 14.548785345  | 7.231598519 | -17.631577932 | 0 | 0 | 1 | # | ob |
| 2019 | 1 | 3 | -1.050000 | 10.506582736  | 2.604003874 | -15.433153738 | 0 | 0 | 1 | # | ob |
| 2020 | 1 | 3 | -1.050000 | 13.095260908  | 1.860389700 | -15.431920289 | 0 | 0 | 1 | # | ob |
| 2021 | 1 | 4 | -0.950000 | 12.352657657  | 0.000940996 | -17.652417115 | 0 | 0 | 1 | # | oh |
| 2022 | 1 | 3 | -1.050000 | 15.020481651  | 0.003976970 | -15.603517583 | 0 | 0 | 1 | # | ob |
| 2023 | 1 | 4 | -0.950000 | 14.941007657  | 4.455490996 | -17.652417115 | 0 | 0 | 1 | # | oh |
| 2024 | 1 | 3 | -1.050000 | 12.432131651  | 4.458526970 | -15.603517583 | 0 | 0 | 1 | # | ob |
| 2025 | 1 | 4 | -0.950000 | 13.530842343  | 8.908159004 | 17.652417115  | 0 | 0 | 0 | # | oh |
| 2026 | 1 | 3 | -1.050000 | 10.863018349  | 8.905123030 | 15.603517583  | 0 | 0 | 0 | # | ob |
| 2027 | 1 | 4 | -0.950000 | 10.942492343  | 4.453609004 | 17.652417115  | 0 | 0 | 0 | # | oh |
| 2028 | 1 | 3 | -1.050000 | 13.451368349  | 4.450573030 | 15.603517583  | 0 | 0 | 0 | # | ob |
| 2029 | 1 | 3 | -1.050000 | 14.548205513  | 1.680900680 | -17.631368622 | 0 | 0 | 1 | # | ob |
| 2030 | 1 | 3 | -1.050000 | 10.506910908  | 6.314939700 | -15.431920289 | 0 | 0 | 1 | # | ob |
| 2031 | 1 | 3 | -1.050000 | 13.923064655  | 6.132051481 | 17.631577932  | 0 | 0 | 0 | # | ob |
| 2032 | 1 | 3 | -1.050000 | 12.788567264  | 1.850546126 | 15.433153738  | 0 | 0 | 0 | # | ob |
| 2033 | 1 | 5 | 2.100000  | 14.576397014  | 1.527119204 | -16.002222830 | 0 | 0 | 1 | # | st |
| 2034 | 1 | 5 | 2.100000  | 13.895427774  | 5.973370782 | 16.003201903  | 0 | 0 | 0 | # | st |
| 2035 | 1 | 5 | 2.100000  | 11.307102986  | 7.381980796 | 16.002222830  | 0 | 0 | 0 | # | st |
| 2036 | 1 | 5 | 2.100000  | 13.895452986  | 2.927430796 | 16.002222830  | 0 | 0 | 0 | # | st |
| 2037 | 1 | 5 | 2.100000  | 14.576422226  | 7.390279218 | -16.003201903 | 0 | 0 | 1 | # | st |
| 2038 | 1 | 5 | 2.100000  | 11.988072226  | 2.935729218 | -16.003201903 | 0 | 0 | 1 | # | st |
| 2039 | 1 | 5 | 2.100000  | 11.988047014  | 5.981669204 | -16.002222830 | 0 | 0 | 1 | # | st |
| 2040 | 1 | 5 | 2.100000  | 11.307077774  | 1.518820782 | 16.003201903  | 0 | 0 | 0 | # | st |
| 2041 | 1 | 1 | 1.575000  | -12.941544971 | 1.474661568 | -18.664729368 | 1 | 0 | 1 | # | ao |
| 2042 | 1 | 1 | 1.575000  | -15.529894971 | 5.929211568 | -18.664729368 | 1 | 0 | 1 | # | ao |
| 2043 | 1 | 1 | 1.575000  | -12.941955029 | 7.434438432 | 18.664729368  | 1 | 0 | 0 | # | ao |
| 2044 | 1 | 1 | 1.575000  | -10.353605029 | 2.979888432 | 18.664729368  | 1 | 0 | 0 | # | ao |
| 2045 | 1 | 2 | 0.425000  | -11.795449128 | 4.457267322 | -17.178884937 | 1 | 0 | 1 | # | ho |
| 2046 | 1 | 2 | 0.425000  | -14.383799128 | 0.002717322 | -17.178884937 | 1 | 0 | 1 | # | ho |
| 2047 | 1 | 2 | 0.425000  | -14.088050872 | 4.451832678 | 17.178884937  | 1 | 0 | 0 | # | ho |
| 2048 | 1 | 2 | 0.425000  | -11.499700872 | 8.906382678 | 17.178884937  | 1 | 0 | 0 | # | ho |
| 2049 | 1 | 3 | -1.050000 | -14.548785345 | 1.677501481 | 17.631577932  | 1 | 0 | 0 | # | ob |
| 2050 | 1 | 3 | -1.050000 | -10.506582736 | 6.305096126 | 15.433153738  | 1 | 0 | 0 | # | ob |
| 2051 | 1 | 3 | -1.050000 | -11.959855513 | 2.773649320 | 17.631368622  | 1 | 0 | 0 | # | ob |
| 2052 | 1 | 3 | -1.050000 | -13.095260908 | 7.048710300 | 15.431920289  | 1 | 0 | 0 | # | ob |
| 2053 | 1 | 3 | -1.050000 | -14.548205513 | 7.228199320 | 17.631368622  | 1 | 0 | 0 | # | ob |
| 2054 | 1 | 3 | -1.050000 | -13.923644487 | 6.135450680 | -17.631368622 | 1 | 0 | 1 | # | ob |
| 2055 | 1 | 3 | -1.050000 | -10.506910908 | 2.594160300 | 15.431920289  | 1 | 0 | 0 | # | ob |
| 2056 | 1 | 3 | -1.050000 | -13.923064655 | 2.777048519 | -17.631577932 | 1 | 0 | 1 | # | ob |
| 2057 | 1 | 3 | -1.050000 | -12.788567264 | 7.058553874 | -15.433153738 | 1 | 0 | 1 | # | ob |
| 2058 | 1 | 3 | -1.050000 | -11.334714655 | 7.231598519 | -17.631577932 | 1 | 0 | 1 | # | ob |
| 2059 | 1 | 3 | -1.050000 | -15.376917264 | 2.604003874 | -15.433153738 | 1 | 0 | 1 | # | ob |
| 2060 | 1 | 3 | -1.050000 | -12.788239092 | 1.860389700 | -15.431920289 | 1 | 0 | 1 | # | ob |
| 2061 | 1 | 4 | -0.950000 | -13.530842343 | 0.000940996 | -17.652417115 | 1 | 0 | 1 | # | oh |
| 2062 | 1 | 3 | -1.050000 | -10.863018349 | 0.003976970 | -15.603517583 | 1 | 0 | 1 | # | ob |
| 2063 | 1 | 4 | -0.950000 | -10.942492343 | 4.455490996 | -17.652417115 | 1 | 0 | 1 | # | oh |
| 2064 | 1 | 3 | -1.050000 | -13.451368349 | 4.458526970 | -15.603517583 | 1 | 0 | 1 | # | ob |
| 2065 | 1 | 4 | -0.950000 | -12.352657657 | 8.908159004 | 17.652417115  | 1 | 0 | 0 | # | oh |
| 2066 | 1 | 3 | -1.050000 | -15.020481651 | 8.905123030 | 15.603517583  | 1 | 0 | 0 | # | ob |
| 2067 | 1 | 4 | -0.950000 | -14.941007657 | 4.453609004 | 17.652417115  | 1 | 0 | 0 | # | oh |
| 2068 | 1 | 3 | -1.050000 | -12.432131651 | 4.450573030 | 15.603517583  | 1 | 0 | 0 | # | ob |
| 2069 | 1 | 3 | -1.050000 | -11.335294487 | 1.680900680 | -17.631368622 | 1 | 0 | 1 | # | ob |
| 2070 | 1 | 3 | -1.050000 | -15.376589092 | 6.314939700 | -15.431920289 | 1 | 0 | 1 | # | ob |
| 2071 | 1 | 3 | -1.050000 | -11.960435345 | 6.132051481 | 17.631577932  | 1 | 0 | 0 | # | ob |
| 2072 | 1 | 3 | -1.050000 | -13.094932736 | 1.850546126 | 15.433153738  | 1 | 0 | 0 | # | ob |
| 2073 | 1 | 5 | 2.100000  | -11.307102986 | 1.527119204 | -16.002222830 | 1 | 0 | 1 | # | st |

|      |   |   |           |               |              |               |   |   |   |   |    |
|------|---|---|-----------|---------------|--------------|---------------|---|---|---|---|----|
| 2074 | 1 | 5 | 2.100000  | -11.988072226 | 5.973370782  | 16.003201903  | 1 | 0 | 0 | # | st |
| 2075 | 1 | 5 | 2.100000  | -14.576397014 | 7.381980796  | 16.002222830  | 1 | 0 | 0 | # | st |
| 2076 | 1 | 5 | 2.100000  | -11.988047014 | 2.927430796  | 16.002222830  | 1 | 0 | 0 | # | st |
| 2077 | 1 | 5 | 2.100000  | -11.307077774 | 7.390279218  | -16.003201903 | 1 | 0 | 1 | # | st |
| 2078 | 1 | 5 | 2.100000  | -13.895427774 | 2.935729218  | -16.003201903 | 1 | 0 | 1 | # | st |
| 2079 | 1 | 5 | 2.100000  | -13.895452986 | 5.981669204  | -16.002222830 | 1 | 0 | 1 | # | st |
| 2080 | 1 | 5 | 2.100000  | -14.576422226 | 1.518820782  | 16.003201903  | 1 | 0 | 0 | # | st |
| 2081 | 1 | 1 | 1.575000  | -7.764844971  | 1.474661568  | -18.664729368 | 1 | 0 | 1 | # | ao |
| 2082 | 1 | 1 | 1.575000  | -10.353194971 | 5.929211568  | -18.664729368 | 1 | 0 | 1 | # | ao |
| 2083 | 1 | 1 | 1.575000  | -7.765255029  | 7.434438432  | 18.664729368  | 1 | 0 | 0 | # | ao |
| 2084 | 1 | 1 | 1.575000  | -5.176905029  | 2.979888432  | 18.664729368  | 1 | 0 | 0 | # | ao |
| 2085 | 1 | 2 | 0.425000  | -6.618749128  | 4.457267322  | -17.178884937 | 1 | 0 | 1 | # | ho |
| 2086 | 1 | 2 | 0.425000  | -9.207099128  | 0.002717322  | -17.178884937 | 1 | 0 | 1 | # | ho |
| 2087 | 1 | 2 | 0.425000  | -8.911350872  | 4.451832678  | 17.178884937  | 1 | 0 | 0 | # | ho |
| 2088 | 1 | 2 | 0.425000  | -6.323000872  | 8.906382678  | 17.178884937  | 1 | 0 | 0 | # | ho |
| 2089 | 1 | 3 | -1.050000 | -9.372085345  | 1.677501481  | 17.631577932  | 1 | 0 | 0 | # | ob |
| 2090 | 1 | 3 | -1.050000 | -5.329882736  | 6.305096126  | 15.433153738  | 1 | 0 | 0 | # | ob |
| 2091 | 1 | 3 | -1.050000 | -6.783155513  | 2.773649320  | 17.631368622  | 1 | 0 | 0 | # | ob |
| 2092 | 1 | 3 | -1.050000 | -7.918560908  | 7.048710300  | 15.431920289  | 1 | 0 | 0 | # | ob |
| 2093 | 1 | 3 | -1.050000 | -9.371505513  | 7.228199320  | 17.631368622  | 1 | 0 | 0 | # | ob |
| 2094 | 1 | 3 | -1.050000 | -8.746944487  | 6.135450680  | -17.631368622 | 1 | 0 | 1 | # | ob |
| 2095 | 1 | 3 | -1.050000 | -5.330210908  | 2.594160300  | 15.431920289  | 1 | 0 | 0 | # | ob |
| 2096 | 1 | 3 | -1.050000 | -8.746364655  | 2.777048519  | -17.631577932 | 1 | 0 | 1 | # | ob |
| 2097 | 1 | 3 | -1.050000 | -7.611867264  | 7.058553874  | -15.433153738 | 1 | 0 | 1 | # | ob |
| 2098 | 1 | 3 | -1.050000 | -6.158014655  | 7.231598519  | -17.631577932 | 1 | 0 | 1 | # | ob |
| 2099 | 1 | 3 | -1.050000 | -10.200217264 | 2.604003874  | -15.433153738 | 1 | 0 | 1 | # | ob |
| 2100 | 1 | 3 | -1.050000 | -7.611539092  | 1.860389700  | -15.431920289 | 1 | 0 | 1 | # | ob |
| 2101 | 1 | 4 | -0.950000 | -8.354142343  | 0.000940996  | -17.652417115 | 1 | 0 | 1 | # | oh |
| 2102 | 1 | 3 | -1.050000 | -5.686318349  | 0.003976970  | -15.603517583 | 1 | 0 | 1 | # | ob |
| 2103 | 1 | 4 | -0.950000 | -5.765792343  | 4.455490996  | -17.652417115 | 1 | 0 | 1 | # | oh |
| 2104 | 1 | 3 | -1.050000 | -8.274668349  | 4.458526970  | -15.603517583 | 1 | 0 | 1 | # | ob |
| 2105 | 1 | 4 | -0.950000 | -7.175957657  | 8.908159004  | 17.652417115  | 1 | 0 | 0 | # | oh |
| 2106 | 1 | 3 | -1.050000 | -9.843781651  | 8.905123030  | 15.603517583  | 1 | 0 | 0 | # | ob |
| 2107 | 1 | 4 | -0.950000 | -9.764307657  | 4.453609004  | 17.652417115  | 1 | 0 | 0 | # | oh |
| 2108 | 1 | 3 | -1.050000 | -7.255431651  | 4.450573030  | 15.603517583  | 1 | 0 | 0 | # | ob |
| 2109 | 1 | 3 | -1.050000 | -6.158594487  | 1.680900680  | -17.631368622 | 1 | 0 | 1 | # | ob |
| 2110 | 1 | 3 | -1.050000 | -10.199889092 | 6.314939700  | -15.431920289 | 1 | 0 | 1 | # | ob |
| 2111 | 1 | 3 | -1.050000 | -6.783735345  | 6.132051481  | 17.631577932  | 1 | 0 | 0 | # | ob |
| 2112 | 1 | 3 | -1.050000 | -7.918232736  | 1.850546126  | 15.433153738  | 1 | 0 | 0 | # | ob |
| 2113 | 1 | 5 | 2.100000  | -6.130402986  | 1.527119204  | -16.002222830 | 1 | 0 | 1 | # | st |
| 2114 | 1 | 5 | 2.100000  | -6.811372226  | 5.973370782  | 16.003201903  | 1 | 0 | 0 | # | st |
| 2115 | 1 | 5 | 2.100000  | -9.399697014  | 7.381980796  | 16.002222830  | 1 | 0 | 0 | # | st |
| 2116 | 1 | 5 | 2.100000  | -6.811347014  | 2.927430796  | 16.002222830  | 1 | 0 | 0 | # | st |
| 2117 | 1 | 5 | 2.100000  | -6.130377774  | 7.390279218  | -16.003201903 | 1 | 0 | 1 | # | st |
| 2118 | 1 | 5 | 2.100000  | -8.718727774  | 2.935729218  | -16.003201903 | 1 | 0 | 1 | # | st |
| 2119 | 1 | 5 | 2.100000  | -8.718752986  | 5.981669204  | -16.002222830 | 1 | 0 | 1 | # | st |
| 2120 | 1 | 5 | 2.100000  | -9.399722226  | 1.518820782  | 16.003201903  | 1 | 0 | 0 | # | st |
| 2121 | 1 | 1 | 1.575000  | -2.588144971  | 1.474661568  | -18.664729368 | 1 | 0 | 1 | # | ao |
| 2122 | 1 | 1 | 1.575000  | -5.176494971  | 5.929211568  | -18.664729368 | 1 | 0 | 1 | # | ao |
| 2123 | 1 | 1 | 1.575000  | -2.588555029  | 7.434438432  | 18.664729368  | 1 | 0 | 0 | # | ao |
| 2124 | 1 | 1 | 1.575000  | -0.000205029  | 2.979888432  | 18.664729368  | 1 | 0 | 0 | # | ao |
| 2125 | 1 | 2 | 0.425000  | -1.442049128  | 4.457267322  | -17.178884937 | 1 | 0 | 1 | # | ho |
| 2126 | 1 | 2 | 0.425000  | -4.030399128  | 0.002717322  | -17.178884937 | 1 | 0 | 1 | # | ho |
| 2127 | 1 | 2 | 0.425000  | -3.734650872  | 4.451832678  | 17.178884937  | 1 | 0 | 0 | # | ho |
| 2128 | 1 | 2 | 0.425000  | -1.146300872  | 8.906382678  | 17.178884937  | 1 | 0 | 0 | # | ho |
| 2129 | 1 | 3 | -1.050000 | -4.195385345  | 1.677501481  | 17.631577932  | 1 | 0 | 0 | # | ob |
| 2130 | 1 | 3 | -1.050000 | -0.153182736  | 6.305096126  | 15.433153738  | 1 | 0 | 0 | # | ob |
| 2131 | 1 | 3 | -1.050000 | -1.606455513  | 2.773649320  | 17.631368622  | 1 | 0 | 0 | # | ob |
| 2132 | 1 | 3 | -1.050000 | -2.741860908  | 7.048710300  | 15.431920289  | 1 | 0 | 0 | # | ob |
| 2133 | 1 | 3 | -1.050000 | -4.194805513  | 7.228199320  | 17.631368622  | 1 | 0 | 0 | # | ob |
| 2134 | 1 | 3 | -1.050000 | -3.570244487  | 6.135450680  | -17.631368622 | 1 | 0 | 1 | # | ob |
| 2135 | 1 | 3 | -1.050000 | -0.153510908  | 2.594160300  | 15.431920289  | 1 | 0 | 0 | # | ob |
| 2136 | 1 | 3 | -1.050000 | -3.569664655  | 2.777048519  | -17.631577932 | 1 | 0 | 1 | # | ob |
| 2137 | 1 | 3 | -1.050000 | -2.435167264  | 7.058553874  | -15.433153738 | 1 | 0 | 1 | # | ob |
| 2138 | 1 | 3 | -1.050000 | -0.981314655  | 7.231598519  | -17.631577932 | 1 | 0 | 1 | # | ob |
| 2139 | 1 | 3 | -1.050000 | -5.023517264  | 2.604003874  | -15.433153738 | 1 | 0 | 1 | # | ob |
| 2140 | 1 | 3 | -1.050000 | -2.434839092  | 1.860389700  | -15.431920289 | 1 | 0 | 1 | # | ob |
| 2141 | 1 | 4 | -0.950000 | -3.177442343  | 0.000940996  | -17.652417115 | 1 | 0 | 1 | # | oh |
| 2142 | 1 | 3 | -1.050000 | -0.509618349  | 0.003976970  | -15.603517583 | 1 | 0 | 1 | # | ob |
| 2143 | 1 | 4 | -0.950000 | -0.589092343  | 4.455490996  | -17.652417115 | 1 | 0 | 1 | # | oh |
| 2144 | 1 | 3 | -1.050000 | -3.097968349  | 4.458526970  | -15.603517583 | 1 | 0 | 1 | # | ob |
| 2145 | 1 | 4 | -0.950000 | -1.999257657  | 8.908159004  | 17.652417115  | 1 | 0 | 0 | # | oh |
| 2146 | 1 | 3 | -1.050000 | -4.667081651  | 8.905123030  | 15.603517583  | 1 | 0 | 0 | # | ob |
| 2147 | 1 | 4 | -0.950000 | -4.587607657  | 4.453609004  | 17.652417115  | 1 | 0 | 0 | # | oh |
| 2148 | 1 | 3 | -1.050000 | -2.078731651  | 4.450573030  | 15.603517583  | 1 | 0 | 0 | # | ob |
| 2149 | 1 | 3 | -1.050000 | -0.981894487  | 1.680900680  | -17.631368622 | 1 | 0 | 1 | # | ob |
| 2150 | 1 | 3 | -1.050000 | -5.023189092  | 6.314939700  | -15.431920289 | 1 | 0 | 1 | # | ob |
| 2151 | 1 | 3 | -1.050000 | -1.607035345  | 6.132051481  | 17.631577932  | 1 | 0 | 0 | # | ob |
| 2152 | 1 | 3 | -1.050000 | -2.741532736  | 1.850546126  | 15.433153738  | 1 | 0 | 0 | # | ob |
| 2153 | 1 | 5 | 2.100000  | -0.953702986  | 1.527119204  | -16.002222830 | 1 | 0 | 1 | # | st |
| 2154 | 1 | 5 | 2.100000  | -1.634672226  | 5.973370782  | 16.003201903  | 1 | 0 | 0 | # | st |
| 2155 | 1 | 5 | 2.100000  | -4.222997014  | 7.381980796  | 16.002222830  | 1 | 0 | 0 | # | st |
| 2156 | 1 | 5 | 2.100000  | -1.634647014  | 2.927430796  | 16.002222830  | 1 | 0 | 0 | # | st |
| 2157 | 1 | 5 | 2.100000  | -0.953677774  | 7.390279218  | -16.003201903 | 1 | 0 | 1 | # | st |
| 2158 | 1 | 5 | 2.100000  | -3.542027774  | 2.935729218  | -16.003201903 | 1 | 0 | 1 | # | st |
| 2159 | 1 | 5 | 2.100000  | -3.542052986  | 5.981669204  | -16.002222830 | 1 | 0 | 1 | # | st |
| 2160 | 1 | 5 | 2.100000  | -4.223022226  | 1.518820782  | 16.003201903  | 1 | 0 | 0 | # | st |
| 2161 | 1 | 1 | 1.575000  | 2.588555029   | 10.383761568 | -18.664729368 | 0 | 0 | 1 | # | ao |
| 2162 | 1 | 1 | 1.575000  | 0.000205029   | 14.838311568 | -18.664729368 | 0 | 0 | 1 | # | ao |
| 2163 | 1 | 1 | 1.575000  | 2.588144971   | 16.343538432 | 18.664729368  | 0 | 0 | 0 | # | ao |
| 2164 | 1 | 1 | 1.575000  | 5.176494971   | 11.888988432 | 18.664729368  | 0 | 0 | 0 | # | ao |
| 2165 | 1 | 2 | 0.425000  | 3.734650872   | 13.366367322 | -17.178884937 | 0 | 0 | 1 | # | ho |
| 2166 | 1 | 2 | 0.425000  | 1.146300872   | 8.911817322  | -17.178884937 | 0 | 0 | 1 | # | ho |

|      |   |   |           |              |              |               |   |   |   |    |
|------|---|---|-----------|--------------|--------------|---------------|---|---|---|----|
| 2167 | 1 | 2 | 0.425000  | 1.442049128  | 13.360932678 | 17.178884937  | 0 | 0 | 0 | ho |
| 2168 | 1 | 2 | 0.425000  | 4.030399128  | 17.815482678 | 17.178884937  | 0 | 0 | 0 | ho |
| 2169 | 1 | 3 | -1.050000 | 0.981314655  | 10.586601481 | 17.631577932  | 0 | 0 | 0 | ob |
| 2170 | 1 | 3 | -1.050000 | 5.023517264  | 15.214196126 | 15.433153738  | 0 | 0 | 0 | ob |
| 2171 | 1 | 3 | -1.050000 | 3.570244487  | 11.682749320 | 17.631368622  | 0 | 0 | 0 | ob |
| 2172 | 1 | 3 | -1.050000 | 2.434839092  | 15.957810300 | 15.431920289  | 0 | 0 | 0 | ob |
| 2173 | 1 | 3 | -1.050000 | 0.981894487  | 16.137299320 | 17.631368622  | 0 | 0 | 0 | ob |
| 2174 | 1 | 3 | -1.050000 | 1.606455513  | 15.044550680 | -17.631368622 | 0 | 0 | 1 | ob |
| 2175 | 1 | 3 | -1.050000 | 5.023189092  | 11.503260300 | 15.431920289  | 0 | 0 | 0 | ob |
| 2176 | 1 | 3 | -1.050000 | 1.607035345  | 11.686148519 | -17.631577932 | 0 | 0 | 1 | ob |
| 2177 | 1 | 3 | -1.050000 | 2.741532736  | 15.967653874 | -15.433153738 | 0 | 0 | 1 | ob |
| 2178 | 1 | 3 | -1.050000 | 4.195385345  | 16.140698519 | -17.631577932 | 0 | 0 | 1 | ob |
| 2179 | 1 | 3 | -1.050000 | 0.153182736  | 11.513103874 | -15.433153738 | 0 | 0 | 1 | ob |
| 2180 | 1 | 3 | -1.050000 | 2.741860908  | 10.769489700 | -15.431920289 | 0 | 0 | 1 | ob |
| 2181 | 1 | 4 | -0.950000 | 1.999257657  | 8.910040996  | -17.652417115 | 0 | 0 | 1 | oh |
| 2182 | 1 | 3 | -1.050000 | 4.667081651  | 8.913076970  | -15.603517583 | 0 | 0 | 1 | ob |
| 2183 | 1 | 4 | -0.950000 | 4.587607657  | 13.364590996 | -17.652417115 | 0 | 0 | 1 | oh |
| 2184 | 1 | 3 | -1.050000 | 2.078731651  | 13.367626970 | -15.603517583 | 0 | 0 | 1 | ob |
| 2185 | 1 | 4 | -0.950000 | 3.177442343  | 17.817259004 | 17.652417115  | 0 | 0 | 0 | oh |
| 2186 | 1 | 3 | -1.050000 | 0.509618349  | 17.814223030 | 15.603517583  | 0 | 0 | 0 | ob |
| 2187 | 1 | 4 | -0.950000 | 0.589092343  | 13.362709004 | 17.652417115  | 0 | 0 | 0 | oh |
| 2188 | 1 | 3 | -1.050000 | 3.097968349  | 13.359673030 | 15.603517583  | 0 | 0 | 0 | ob |
| 2189 | 1 | 3 | -1.050000 | 4.194805513  | 10.590000680 | -17.631368622 | 0 | 0 | 1 | ob |
| 2190 | 1 | 3 | -1.050000 | 0.153510908  | 15.224039700 | -15.431920289 | 0 | 0 | 1 | ob |
| 2191 | 1 | 3 | -1.050000 | 3.569664655  | 15.041151481 | 17.631577932  | 0 | 0 | 0 | ob |
| 2192 | 1 | 3 | -1.050000 | 2.435167264  | 10.759646126 | 15.433153738  | 0 | 0 | 0 | ob |
| 2193 | 1 | 5 | 2.100000  | 4.222997014  | 10.436219204 | -16.002222830 | 0 | 0 | 1 | st |
| 2194 | 1 | 5 | 2.100000  | 3.542027774  | 14.882470782 | 16.003201903  | 0 | 0 | 0 | st |
| 2195 | 1 | 5 | 2.100000  | 0.953702986  | 16.291080796 | 16.002222830  | 0 | 0 | 0 | st |
| 2196 | 1 | 5 | 2.100000  | 3.542052986  | 11.836530796 | 16.002222830  | 0 | 0 | 0 | st |
| 2197 | 1 | 5 | 2.100000  | 4.223022226  | 16.299379218 | -16.003201903 | 0 | 0 | 1 | st |
| 2198 | 1 | 5 | 2.100000  | 1.634672226  | 11.844829218 | -16.003201903 | 0 | 0 | 1 | st |
| 2199 | 1 | 5 | 2.100000  | 1.634647014  | 14.890769204 | -16.002222830 | 0 | 0 | 1 | st |
| 2200 | 1 | 5 | 2.100000  | 0.953677774  | 10.427920782 | 16.003201903  | 0 | 0 | 0 | st |
| 2201 | 1 | 1 | 1.575000  | 7.765255029  | 10.383761568 | -18.664729368 | 0 | 0 | 1 | ao |
| 2202 | 1 | 1 | 1.575000  | 5.176905029  | 14.838311568 | -18.664729368 | 0 | 0 | 1 | ao |
| 2203 | 1 | 1 | 1.575000  | 7.764844971  | 16.343538432 | 18.664729368  | 0 | 0 | 0 | ao |
| 2204 | 1 | 1 | 1.575000  | 10.353194971 | 11.888988432 | 18.664729368  | 0 | 0 | 0 | ao |
| 2205 | 1 | 2 | 0.425000  | 8.911350872  | 13.366367322 | -17.178884937 | 0 | 0 | 1 | ho |
| 2206 | 1 | 2 | 0.425000  | 6.323000872  | 8.911817322  | -17.178884937 | 0 | 0 | 1 | ho |
| 2207 | 1 | 2 | 0.425000  | 6.618749128  | 13.360932678 | 17.178884937  | 0 | 0 | 0 | ho |
| 2208 | 1 | 2 | 0.425000  | 9.207099128  | 17.815482678 | 17.178884937  | 0 | 0 | 0 | ho |
| 2209 | 1 | 3 | -1.050000 | 6.158014655  | 10.586601481 | 17.631577932  | 0 | 0 | 0 | ob |
| 2210 | 1 | 3 | -1.050000 | 10.200217264 | 15.214196126 | 15.433153738  | 0 | 0 | 0 | ob |
| 2211 | 1 | 3 | -1.050000 | 8.746944487  | 11.682749320 | 17.631368622  | 0 | 0 | 0 | ob |
| 2212 | 1 | 3 | -1.050000 | 7.611539092  | 15.957810300 | 15.431920289  | 0 | 0 | 0 | ob |
| 2213 | 1 | 3 | -1.050000 | 6.158594487  | 16.137299320 | 17.631368622  | 0 | 0 | 0 | ob |
| 2214 | 1 | 3 | -1.050000 | 6.783155513  | 15.044550680 | -17.631368622 | 0 | 0 | 1 | ob |
| 2215 | 1 | 3 | -1.050000 | 10.199889092 | 11.503260300 | 15.431920289  | 0 | 0 | 0 | ob |
| 2216 | 1 | 3 | -1.050000 | 6.783735345  | 11.686148519 | -17.631577932 | 0 | 0 | 1 | ob |
| 2217 | 1 | 3 | -1.050000 | 7.918232736  | 15.967653874 | -15.433153738 | 0 | 0 | 1 | ob |
| 2218 | 1 | 3 | -1.050000 | 9.372085345  | 16.140698519 | -17.631577932 | 0 | 0 | 1 | ob |
| 2219 | 1 | 3 | -1.050000 | 5.329882736  | 11.513103874 | -15.433153738 | 0 | 0 | 1 | ob |
| 2220 | 1 | 3 | -1.050000 | 7.918560908  | 10.769489700 | -15.431920289 | 0 | 0 | 1 | ob |
| 2221 | 1 | 4 | -0.950000 | 7.175957657  | 8.910040996  | -17.652417115 | 0 | 0 | 1 | oh |
| 2222 | 1 | 3 | -1.050000 | 9.843781651  | 8.913076970  | -15.603517583 | 0 | 0 | 1 | ob |
| 2223 | 1 | 4 | -0.950000 | 9.764307657  | 13.364590996 | -17.652417115 | 0 | 0 | 1 | oh |
| 2224 | 1 | 3 | -1.050000 | 7.255431651  | 13.367626970 | -15.603517583 | 0 | 0 | 1 | ob |
| 2225 | 1 | 4 | -0.950000 | 8.354142343  | 17.817259004 | 17.652417115  | 0 | 0 | 0 | oh |
| 2226 | 1 | 3 | -1.050000 | 5.686318349  | 17.814223030 | 15.603517583  | 0 | 0 | 0 | ob |
| 2227 | 1 | 4 | -0.950000 | 5.765792343  | 13.362709004 | 17.652417115  | 0 | 0 | 0 | oh |
| 2228 | 1 | 3 | -1.050000 | 8.274668349  | 13.359673030 | 15.603517583  | 0 | 0 | 0 | ob |
| 2229 | 1 | 3 | -1.050000 | 9.371505513  | 10.590000680 | -17.631368622 | 0 | 0 | 1 | ob |
| 2230 | 1 | 3 | -1.050000 | 5.330210908  | 15.224039700 | -15.431920289 | 0 | 0 | 1 | ob |
| 2231 | 1 | 3 | -1.050000 | 8.746364655  | 15.041151481 | 17.631577932  | 0 | 0 | 0 | ob |
| 2232 | 1 | 3 | -1.050000 | 7.611867264  | 10.759646126 | 15.433153738  | 0 | 0 | 0 | ob |
| 2233 | 1 | 5 | 2.100000  | 9.399697014  | 10.436219204 | -16.002222830 | 0 | 0 | 1 | st |
| 2234 | 1 | 5 | 2.100000  | 8.718727774  | 14.882470782 | 16.003201903  | 0 | 0 | 0 | st |
| 2235 | 1 | 5 | 2.100000  | 6.130402986  | 16.291080796 | 16.002222830  | 0 | 0 | 0 | st |
| 2236 | 1 | 5 | 2.100000  | 8.718752986  | 11.836530796 | 16.002222830  | 0 | 0 | 0 | st |
| 2237 | 1 | 5 | 2.100000  | 9.399722226  | 16.299379218 | -16.003201903 | 0 | 0 | 1 | st |
| 2238 | 1 | 5 | 2.100000  | 6.811372226  | 11.844829218 | -16.003201903 | 0 | 0 | 1 | st |
| 2239 | 1 | 5 | 2.100000  | 6.811347014  | 14.890769204 | -16.002222830 | 0 | 0 | 1 | st |
| 2240 | 1 | 5 | 2.100000  | 6.130377774  | 10.427920782 | 16.003201903  | 0 | 0 | 0 | st |
| 2241 | 1 | 1 | 1.575000  | 12.941955029 | 10.383761568 | -18.664729368 | 0 | 0 | 1 | ao |
| 2242 | 1 | 1 | 1.575000  | 10.353605029 | 14.838311568 | -18.664729368 | 0 | 0 | 1 | ao |
| 2243 | 1 | 1 | 1.575000  | 12.941544971 | 16.343538432 | 18.664729368  | 0 | 0 | 0 | ao |
| 2244 | 1 | 1 | 1.575000  | 15.529894971 | 11.888988432 | 18.664729368  | 0 | 0 | 0 | ao |
| 2245 | 1 | 2 | 0.425000  | 14.088050872 | 13.366367322 | -17.178884937 | 0 | 0 | 1 | ho |
| 2246 | 1 | 2 | 0.425000  | 11.499700872 | 8.911817322  | -17.178884937 | 0 | 0 | 1 | ho |
| 2247 | 1 | 2 | 0.425000  | 11.795449128 | 13.360932678 | 17.178884937  | 0 | 0 | 0 | ho |
| 2248 | 1 | 2 | 0.425000  | 14.383799128 | 17.815482678 | 17.178884937  | 0 | 0 | 0 | ho |
| 2249 | 1 | 3 | -1.050000 | 11.334714655 | 10.586601481 | 17.631577932  | 0 | 0 | 0 | ob |
| 2250 | 1 | 3 | -1.050000 | 15.376917264 | 15.214196126 | 15.433153738  | 0 | 0 | 0 | ob |
| 2251 | 1 | 3 | -1.050000 | 13.923644487 | 11.682749320 | 17.631368622  | 0 | 0 | 0 | ob |
| 2252 | 1 | 3 | -1.050000 | 12.788239092 | 15.957810300 | 15.431920289  | 0 | 0 | 0 | ob |
| 2253 | 1 | 3 | -1.050000 | 11.335294487 | 16.137299320 | 17.631368622  | 0 | 0 | 0 | ob |
| 2254 | 1 | 3 | -1.050000 | 11.959855513 | 15.044550680 | -17.631368622 | 0 | 0 | 1 | ob |
| 2255 | 1 | 3 | -1.050000 | 15.376589092 | 11.503260300 | 15.431920289  | 0 | 0 | 0 | ob |
| 2256 | 1 | 3 | -1.050000 | 11.960435345 | 11.686148519 | -17.631577932 | 0 | 0 | 1 | ob |
| 2257 | 1 | 3 | -1.050000 | 13.094932736 | 15.967653874 | -15.433153738 | 0 | 0 | 1 | ob |
| 2258 | 1 | 3 | -1.050000 | 14.548785345 | 16.140698519 | -17.631577932 | 0 | 0 | 1 | ob |
| 2259 | 1 | 3 | -1.050000 | 10.506582736 | 11.513103874 | -15.433153738 | 0 | 0 | 1 | ob |



|      |   |   |           |               |              |               |   |   |   |   |    |
|------|---|---|-----------|---------------|--------------|---------------|---|---|---|---|----|
| 2260 | 1 | 3 | -1.050000 | 13.095260908  | 10.769489700 | -15.431920289 | 0 | 0 | 1 | # | ob |
| 2261 | 1 | 4 | -0.950000 | 12.352657657  | 8.910040996  | -17.652417115 | 0 | 0 | 1 | # | oh |
| 2262 | 1 | 3 | -1.050000 | 15.020481651  | 8.913076970  | -15.603517583 | 0 | 0 | 1 | # | ob |
| 2263 | 1 | 4 | -0.950000 | 14.941007657  | 13.364590996 | -17.652417115 | 0 | 0 | 1 | # | oh |
| 2264 | 1 | 3 | -1.050000 | 12.432131651  | 13.367626970 | -15.603517583 | 0 | 0 | 1 | # | ob |
| 2265 | 1 | 4 | -0.950000 | 13.530842343  | 17.817259004 | 17.652417115  | 0 | 0 | 0 | # | oh |
| 2266 | 1 | 3 | -1.050000 | 10.863018349  | 17.814223030 | 15.603517583  | 0 | 0 | 0 | # | ob |
| 2267 | 1 | 4 | -0.950000 | 10.942492343  | 13.362709004 | 17.652417115  | 0 | 0 | 0 | # | oh |
| 2268 | 1 | 3 | -1.050000 | 13.451368349  | 13.359673030 | 15.603517583  | 0 | 0 | 0 | # | ob |
| 2269 | 1 | 3 | -1.050000 | 14.548205513  | 10.590000680 | -17.631368622 | 0 | 0 | 1 | # | ob |
| 2270 | 1 | 3 | -1.050000 | 10.506910908  | 15.224039700 | -15.431920289 | 0 | 0 | 1 | # | ob |
| 2271 | 1 | 3 | -1.050000 | 13.923064655  | 15.041151481 | 17.631577932  | 0 | 0 | 0 | # | ob |
| 2272 | 1 | 3 | -1.050000 | 12.788567264  | 10.759646126 | 15.433153738  | 0 | 0 | 0 | # | ob |
| 2273 | 1 | 5 | 2.100000  | 14.576397014  | 10.436219204 | -16.002222830 | 0 | 0 | 1 | # | st |
| 2274 | 1 | 5 | 2.100000  | 13.895427774  | 14.882470782 | 16.003201903  | 0 | 0 | 0 | # | st |
| 2275 | 1 | 5 | 2.100000  | 11.307102986  | 16.291080796 | 16.002222830  | 0 | 0 | 0 | # | st |
| 2276 | 1 | 5 | 2.100000  | 13.895452986  | 11.836530796 | 16.002222830  | 0 | 0 | 0 | # | st |
| 2277 | 1 | 5 | 2.100000  | 14.576422226  | 16.299379218 | -16.003201903 | 0 | 0 | 1 | # | st |
| 2278 | 1 | 5 | 2.100000  | 11.988072226  | 11.844829218 | -16.003201903 | 0 | 0 | 1 | # | st |
| 2279 | 1 | 5 | 2.100000  | 11.988047014  | 14.890769204 | -16.002222830 | 0 | 0 | 1 | # | st |
| 2280 | 1 | 5 | 2.100000  | 11.307077774  | 10.427920782 | 16.003201903  | 0 | 0 | 0 | # | st |
| 2281 | 1 | 1 | 1.575000  | -12.941544971 | 10.383761568 | -18.664729368 | 1 | 0 | 1 | # | ao |
| 2282 | 1 | 1 | 1.575000  | -15.529894971 | 14.838311568 | -18.664729368 | 1 | 0 | 1 | # | ao |
| 2283 | 1 | 1 | 1.575000  | -12.941955029 | 16.343538432 | 18.664729368  | 1 | 0 | 0 | # | ao |
| 2284 | 1 | 1 | 1.575000  | -10.353605029 | 11.888988432 | 18.664729368  | 1 | 0 | 0 | # | ao |
| 2285 | 1 | 2 | 0.425000  | -11.795449128 | 13.366367322 | -17.178884937 | 1 | 0 | 1 | # | ho |
| 2286 | 1 | 2 | 0.425000  | -14.383799128 | 8.911817322  | -17.178884937 | 1 | 0 | 1 | # | ho |
| 2287 | 1 | 2 | 0.425000  | -14.088050872 | 13.360932678 | 17.178884937  | 1 | 0 | 0 | # | ho |
| 2288 | 1 | 2 | 0.425000  | -11.499700872 | 17.815482678 | 17.178884937  | 1 | 0 | 0 | # | ho |
| 2289 | 1 | 3 | -1.050000 | -14.548785345 | 10.586601481 | 17.631577932  | 1 | 0 | 0 | # | ob |
| 2290 | 1 | 3 | -1.050000 | -10.506582736 | 15.214196126 | 15.433153738  | 1 | 0 | 0 | # | ob |
| 2291 | 1 | 3 | -1.050000 | -11.959855513 | 11.682749320 | 17.631368622  | 1 | 0 | 0 | # | ob |
| 2292 | 1 | 3 | -1.050000 | -13.095260908 | 15.957810300 | 15.431920289  | 1 | 0 | 0 | # | ob |
| 2293 | 1 | 3 | -1.050000 | -14.548205513 | 16.137299320 | 17.631368622  | 1 | 0 | 0 | # | ob |
| 2294 | 1 | 3 | -1.050000 | -13.923644487 | 15.044550680 | -17.631368622 | 1 | 0 | 1 | # | ob |
| 2295 | 1 | 3 | -1.050000 | -10.506910908 | 11.503260300 | 15.431920289  | 1 | 0 | 0 | # | ob |
| 2296 | 1 | 3 | -1.050000 | -13.923064655 | 11.686148519 | -17.631577932 | 1 | 0 | 1 | # | ob |
| 2297 | 1 | 3 | -1.050000 | -12.788567264 | 15.967653874 | -15.433153738 | 1 | 0 | 1 | # | ob |
| 2298 | 1 | 3 | -1.050000 | -11.334714655 | 16.140698519 | -17.631577932 | 1 | 0 | 1 | # | ob |
| 2299 | 1 | 3 | -1.050000 | -15.376917264 | 11.513103874 | -15.433153738 | 1 | 0 | 1 | # | ob |
| 2300 | 1 | 3 | -1.050000 | -12.788239092 | 10.769489700 | -15.431920289 | 1 | 0 | 1 | # | ob |
| 2301 | 1 | 4 | -0.950000 | -13.530842343 | 8.910040996  | -17.652417115 | 1 | 0 | 1 | # | oh |
| 2302 | 1 | 3 | -1.050000 | -10.863018349 | 8.913076970  | -15.603517583 | 1 | 0 | 1 | # | ob |
| 2303 | 1 | 4 | -0.950000 | -10.942492343 | 13.364590996 | -17.652417115 | 1 | 0 | 1 | # | oh |
| 2304 | 1 | 3 | -1.050000 | -13.451368349 | 13.367626970 | -15.603517583 | 1 | 0 | 1 | # | ob |
| 2305 | 1 | 4 | -0.950000 | -12.352657657 | 17.817259004 | 17.652417115  | 1 | 0 | 0 | # | oh |
| 2306 | 1 | 3 | -1.050000 | -15.020481651 | 17.814223030 | 15.603517583  | 1 | 0 | 0 | # | ob |
| 2307 | 1 | 4 | -0.950000 | -14.941007657 | 13.362709004 | 17.652417115  | 1 | 0 | 0 | # | oh |
| 2308 | 1 | 3 | -1.050000 | -12.432131651 | 13.359673030 | 15.603517583  | 1 | 0 | 0 | # | ob |
| 2309 | 1 | 3 | -1.050000 | -11.335294487 | 10.590000680 | -17.631368622 | 1 | 0 | 1 | # | ob |
| 2310 | 1 | 3 | -1.050000 | -15.376589092 | 15.224039700 | -15.431920289 | 1 | 0 | 1 | # | ob |
| 2311 | 1 | 3 | -1.050000 | -11.960435345 | 15.041151481 | 17.631577932  | 1 | 0 | 0 | # | ob |
| 2312 | 1 | 3 | -1.050000 | -13.094932736 | 10.759646126 | 15.433153738  | 1 | 0 | 0 | # | ob |
| 2313 | 1 | 5 | 2.100000  | -11.307102986 | 10.436219204 | -16.002222830 | 1 | 0 | 1 | # | st |
| 2314 | 1 | 5 | 2.100000  | -11.988072226 | 14.882470782 | 16.003201903  | 1 | 0 | 0 | # | st |
| 2315 | 1 | 5 | 2.100000  | -14.576397014 | 16.291080796 | 16.002222830  | 1 | 0 | 0 | # | st |
| 2316 | 1 | 5 | 2.100000  | -11.988047014 | 11.836530796 | 16.002222830  | 1 | 0 | 0 | # | st |
| 2317 | 1 | 5 | 2.100000  | -11.307077774 | 16.299379218 | -16.003201903 | 1 | 0 | 1 | # | st |
| 2318 | 1 | 5 | 2.100000  | -13.895427774 | 11.844829218 | -16.003201903 | 1 | 0 | 1 | # | st |
| 2319 | 1 | 5 | 2.100000  | -13.895452986 | 14.890769204 | -16.002222830 | 1 | 0 | 1 | # | st |
| 2320 | 1 | 5 | 2.100000  | -14.576422226 | 10.427920782 | 16.003201903  | 1 | 0 | 0 | # | st |
| 2321 | 1 | 1 | 1.575000  | -7.764844971  | 10.383761568 | -18.664729368 | 1 | 0 | 1 | # | ao |
| 2322 | 1 | 1 | 1.575000  | -10.353194971 | 14.838311568 | -18.664729368 | 1 | 0 | 1 | # | ao |
| 2323 | 1 | 1 | 1.575000  | -7.765255029  | 16.343538432 | 18.664729368  | 1 | 0 | 0 | # | ao |
| 2324 | 1 | 1 | 1.575000  | -5.176905029  | 11.888988432 | 18.664729368  | 1 | 0 | 0 | # | ao |
| 2325 | 1 | 2 | 0.425000  | -6.618749128  | 13.366367322 | -17.178884937 | 1 | 0 | 1 | # | ho |
| 2326 | 1 | 2 | 0.425000  | -9.207099128  | 8.911817322  | -17.178884937 | 1 | 0 | 1 | # | ho |
| 2327 | 1 | 2 | 0.425000  | -8.911350872  | 13.360932678 | 17.178884937  | 1 | 0 | 0 | # | ho |
| 2328 | 1 | 2 | 0.425000  | -6.323000872  | 17.815482678 | 17.178884937  | 1 | 0 | 0 | # | ho |
| 2329 | 1 | 3 | -1.050000 | -9.372085345  | 10.586601481 | 17.631577932  | 1 | 0 | 0 | # | ob |
| 2330 | 1 | 3 | -1.050000 | -5.329882736  | 15.214196126 | 15.433153738  | 1 | 0 | 0 | # | ob |
| 2331 | 1 | 3 | -1.050000 | -6.783155513  | 11.682749320 | 17.631368622  | 1 | 0 | 0 | # | ob |
| 2332 | 1 | 3 | -1.050000 | -7.918560908  | 15.957810300 | 15.431920289  | 1 | 0 | 0 | # | ob |
| 2333 | 1 | 3 | -1.050000 | -9.371505513  | 16.137299320 | 17.631368622  | 1 | 0 | 0 | # | ob |
| 2334 | 1 | 3 | -1.050000 | -8.746944487  | 15.044550680 | -17.631368622 | 1 | 0 | 1 | # | ob |
| 2335 | 1 | 3 | -1.050000 | -5.330210908  | 11.503260300 | 15.431920289  | 1 | 0 | 0 | # | ob |
| 2336 | 1 | 3 | -1.050000 | -8.746364655  | 11.686148519 | -17.631577932 | 1 | 0 | 1 | # | ob |
| 2337 | 1 | 3 | -1.050000 | -7.611867264  | 15.967653874 | -15.433153738 | 1 | 0 | 1 | # | ob |
| 2338 | 1 | 3 | -1.050000 | -6.158014655  | 16.140698519 | -17.631577932 | 1 | 0 | 1 | # | ob |
| 2339 | 1 | 3 | -1.050000 | -10.200217264 | 11.513103874 | -15.433153738 | 1 | 0 | 1 | # | ob |
| 2340 | 1 | 3 | -1.050000 | -7.611539092  | 10.769489700 | -15.431920289 | 1 | 0 | 1 | # | ob |
| 2341 | 1 | 4 | -0.950000 | -8.354142343  | 8.910040996  | -17.652417115 | 1 | 0 | 1 | # | oh |
| 2342 | 1 | 3 | -1.050000 | -5.686318349  | 8.913076970  | -15.603517583 | 1 | 0 | 1 | # | ob |
| 2343 | 1 | 4 | -0.950000 | -5.765792343  | 13.364590996 | -17.652417115 | 1 | 0 | 1 | # | oh |
| 2344 | 1 | 3 | -1.050000 | -8.274668349  | 13.367626970 | -15.603517583 | 1 | 0 | 1 | # | ob |
| 2345 | 1 | 4 | -0.950000 | -7.175957657  | 17.817259004 | 17.652417115  | 1 | 0 | 0 | # | oh |
| 2346 | 1 | 3 | -1.050000 | -9.843781651  | 17.814223030 | 15.603517583  | 1 | 0 | 0 | # | ob |
| 2347 | 1 | 4 | -0.950000 | -9.764307657  | 13.362709004 | 17.652417115  | 1 | 0 | 0 | # | oh |
| 2348 | 1 | 3 | -1.050000 | -7.255431651  | 13.359673030 | 15.603517583  | 1 | 0 | 0 | # | ob |
| 2349 | 1 | 3 | -1.050000 | -6.158594487  | 10.590000680 | -17.631368622 | 1 | 0 | 1 | # | ob |
| 2350 | 1 | 3 | -1.050000 | -10.199889092 | 15.224039700 | -15.431920289 | 1 | 0 | 1 | # | ob |
| 2351 | 1 | 3 | -1.050000 | -6.783735345  | 15.041151481 | 17.631577932  | 1 | 0 | 0 | # | ob |
| 2352 | 1 | 3 | -1.050000 | -7.918232736  | 10.759646126 | 15.433153738  | 1 | 0 | 0 | # | ob |

|      |   |   |           |              |               |               |   |   |   |   |    |
|------|---|---|-----------|--------------|---------------|---------------|---|---|---|---|----|
| 2353 | 1 | 5 | 2.100000  | -6.130402986 | 10.436219204  | -16.002222830 | 1 | 0 | 1 | # | st |
| 2354 | 1 | 5 | 2.100000  | -6.811372226 | 14.882470782  | 16.003201903  | 1 | 0 | 0 | # | st |
| 2355 | 1 | 5 | 2.100000  | -9.399697014 | 16.291080796  | 16.002222830  | 1 | 0 | 0 | # | st |
| 2356 | 1 | 5 | 2.100000  | -6.811347014 | 11.836530796  | 16.002222830  | 1 | 0 | 0 | # | st |
| 2357 | 1 | 5 | 2.100000  | -6.130377774 | 16.299379218  | -16.003201903 | 1 | 0 | 1 | # | st |
| 2358 | 1 | 5 | 2.100000  | -8.718727774 | 11.844829218  | -16.003201903 | 1 | 0 | 1 | # | st |
| 2359 | 1 | 5 | 2.100000  | -8.718752986 | 14.890769204  | -16.002222830 | 1 | 0 | 1 | # | st |
| 2360 | 1 | 5 | 2.100000  | -9.399722226 | 10.427920782  | 16.003201903  | 1 | 0 | 0 | # | st |
| 2361 | 1 | 1 | 1.575000  | -2.588144971 | 10.383761568  | -18.664729368 | 1 | 0 | 1 | # | ao |
| 2362 | 1 | 1 | 1.575000  | -5.176494971 | 14.838311568  | -18.664729368 | 1 | 0 | 1 | # | ao |
| 2363 | 1 | 1 | 1.575000  | -2.588555029 | 16.343538432  | 18.664729368  | 1 | 0 | 0 | # | ao |
| 2364 | 1 | 1 | 1.575000  | -0.000205029 | 11.888988432  | 18.664729368  | 1 | 0 | 0 | # | ao |
| 2365 | 1 | 2 | 0.425000  | -1.442049128 | 13.366367322  | -17.178884937 | 1 | 0 | 1 | # | ho |
| 2366 | 1 | 2 | 0.425000  | -4.030399128 | 8.911817322   | -17.178884937 | 1 | 0 | 1 | # | ho |
| 2367 | 1 | 2 | 0.425000  | -3.734650872 | 13.360932678  | 17.178884937  | 1 | 0 | 0 | # | ho |
| 2368 | 1 | 2 | 0.425000  | -1.146300872 | 17.815482678  | 17.178884937  | 1 | 0 | 0 | # | ho |
| 2369 | 1 | 3 | -1.050000 | -4.195385345 | 10.586601481  | 17.631577932  | 1 | 0 | 0 | # | ob |
| 2370 | 1 | 3 | -1.050000 | -0.153182736 | 15.214196126  | 15.433153738  | 1 | 0 | 0 | # | ob |
| 2371 | 1 | 3 | -1.050000 | -1.606455513 | 11.682749320  | 17.631368622  | 1 | 0 | 0 | # | ob |
| 2372 | 1 | 3 | -1.050000 | -2.741860908 | 15.957810300  | 15.431920289  | 1 | 0 | 0 | # | ob |
| 2373 | 1 | 3 | -1.050000 | -4.194805513 | 16.137299320  | 17.631368622  | 1 | 0 | 0 | # | ob |
| 2374 | 1 | 3 | -1.050000 | -3.570244487 | 15.044550680  | -17.631368622 | 1 | 0 | 1 | # | ob |
| 2375 | 1 | 3 | -1.050000 | -0.153510908 | 11.503260300  | 15.431920289  | 1 | 0 | 0 | # | ob |
| 2376 | 1 | 3 | -1.050000 | -3.569664655 | 11.686148519  | -17.631577932 | 1 | 0 | 1 | # | ob |
| 2377 | 1 | 3 | -1.050000 | -2.435167264 | 15.967653874  | -15.433153738 | 1 | 0 | 1 | # | ob |
| 2378 | 1 | 3 | -1.050000 | -0.981314655 | 16.140698519  | -17.631577932 | 1 | 0 | 1 | # | ob |
| 2379 | 1 | 3 | -1.050000 | -5.023517264 | 11.513103874  | -15.433153738 | 1 | 0 | 1 | # | ob |
| 2380 | 1 | 3 | -1.050000 | -2.434839092 | 10.769489700  | -15.431920289 | 1 | 0 | 1 | # | ob |
| 2381 | 1 | 4 | -0.950000 | -3.177442343 | 8.910040996   | -17.652417115 | 1 | 0 | 1 | # | oh |
| 2382 | 1 | 3 | -1.050000 | -0.509618349 | 8.913076970   | -15.603517583 | 1 | 0 | 1 | # | ob |
| 2383 | 1 | 4 | -0.950000 | -0.589092343 | 13.364590996  | -17.652417115 | 1 | 0 | 1 | # | oh |
| 2384 | 1 | 3 | -1.050000 | -3.097968349 | 13.367626970  | -15.603517583 | 1 | 0 | 1 | # | ob |
| 2385 | 1 | 4 | -0.950000 | -1.999257657 | 17.817259004  | 17.652417115  | 1 | 0 | 0 | # | oh |
| 2386 | 1 | 3 | -1.050000 | -4.667081651 | 17.814223030  | 15.603517583  | 1 | 0 | 0 | # | ob |
| 2387 | 1 | 4 | -0.950000 | -4.587607657 | 13.362709004  | 17.652417115  | 1 | 0 | 0 | # | oh |
| 2388 | 1 | 3 | -1.050000 | -2.078731651 | 13.359673030  | 15.603517583  | 1 | 0 | 0 | # | ob |
| 2389 | 1 | 3 | -1.050000 | -0.981894487 | 10.590000680  | -17.631368622 | 1 | 0 | 1 | # | ob |
| 2390 | 1 | 3 | -1.050000 | -5.023189092 | 15.224039700  | -15.431920289 | 1 | 0 | 1 | # | ob |
| 2391 | 1 | 3 | -1.050000 | -1.607035345 | 15.041151481  | 17.631577932  | 1 | 0 | 0 | # | ob |
| 2392 | 1 | 3 | -1.050000 | -2.741532736 | 10.759646126  | 15.433153738  | 1 | 0 | 0 | # | ob |
| 2393 | 1 | 5 | 2.100000  | -0.953702986 | 10.436219204  | -16.002222830 | 1 | 0 | 1 | # | st |
| 2394 | 1 | 5 | 2.100000  | -1.634672226 | 14.882470782  | 16.003201903  | 1 | 0 | 0 | # | st |
| 2395 | 1 | 5 | 2.100000  | -4.222997014 | 16.291080796  | 16.002222830  | 1 | 0 | 0 | # | st |
| 2396 | 1 | 5 | 2.100000  | -1.634647014 | 11.836530796  | 16.002222830  | 1 | 0 | 0 | # | st |
| 2397 | 1 | 5 | 2.100000  | -0.953677774 | 16.299379218  | -16.003201903 | 1 | 0 | 1 | # | st |
| 2398 | 1 | 5 | 2.100000  | -3.542027774 | 11.844829218  | -16.003201903 | 1 | 0 | 1 | # | st |
| 2399 | 1 | 5 | 2.100000  | -3.542052986 | 14.890769204  | -16.002222830 | 1 | 0 | 1 | # | st |
| 2400 | 1 | 5 | 2.100000  | -4.223022226 | 10.427920782  | 16.003201903  | 1 | 0 | 0 | # | st |
| 2401 | 1 | 1 | 1.575000  | 2.588555029  | -16.343538432 | -18.664729368 | 0 | 1 | 1 | # | ao |
| 2402 | 1 | 1 | 1.575000  | 0.000205029  | -11.888988432 | -18.664729368 | 0 | 1 | 1 | # | ao |
| 2403 | 1 | 1 | 1.575000  | 2.588144971  | -10.383761568 | 18.664729368  | 0 | 1 | 0 | # | ao |
| 2404 | 1 | 1 | 1.575000  | 5.176494971  | -14.838311568 | 18.664729368  | 0 | 1 | 0 | # | ao |
| 2405 | 1 | 2 | 0.425000  | 3.734650872  | -13.360932678 | -17.178884937 | 0 | 1 | 1 | # | ho |
| 2406 | 1 | 2 | 0.425000  | 1.146300872  | -17.815482678 | -17.178884937 | 0 | 1 | 1 | # | ho |
| 2407 | 1 | 2 | 0.425000  | 1.442049128  | -13.366367322 | 17.178884937  | 0 | 1 | 0 | # | ho |
| 2408 | 1 | 2 | 0.425000  | 4.030399128  | -8.911817322  | 17.178884937  | 0 | 1 | 0 | # | ho |
| 2409 | 1 | 3 | -1.050000 | 0.981314655  | -16.140698519 | 17.631577932  | 0 | 1 | 0 | # | ob |
| 2410 | 1 | 3 | -1.050000 | 5.023517264  | -11.513103874 | 15.433153738  | 0 | 1 | 0 | # | ob |
| 2411 | 1 | 3 | -1.050000 | 3.570244487  | -15.044550680 | 17.631368622  | 0 | 1 | 0 | # | ob |
| 2412 | 1 | 3 | -1.050000 | 2.434839092  | -10.769489700 | 15.431920289  | 0 | 1 | 0 | # | ob |
| 2413 | 1 | 3 | -1.050000 | 0.981894487  | -10.590000680 | 17.631368622  | 0 | 1 | 0 | # | ob |
| 2414 | 1 | 3 | -1.050000 | 1.606455513  | -11.682749320 | -17.631368622 | 0 | 1 | 1 | # | ob |
| 2415 | 1 | 3 | -1.050000 | 5.023189092  | -15.224039700 | 15.431920289  | 0 | 1 | 0 | # | ob |
| 2416 | 1 | 3 | -1.050000 | 1.607035345  | -15.041151481 | -17.631577932 | 0 | 1 | 1 | # | ob |
| 2417 | 1 | 3 | -1.050000 | 2.741532736  | -10.759646126 | -15.433153738 | 0 | 1 | 1 | # | ob |
| 2418 | 1 | 3 | -1.050000 | 4.195385345  | -10.586601481 | -17.631577932 | 0 | 1 | 1 | # | ob |
| 2419 | 1 | 3 | -1.050000 | 0.153182736  | -15.214196126 | -15.433153738 | 0 | 1 | 1 | # | ob |
| 2420 | 1 | 3 | -1.050000 | 2.741860908  | -15.957810300 | -15.431920289 | 0 | 1 | 1 | # | ob |
| 2421 | 1 | 4 | -0.950000 | 1.999257657  | -17.817259004 | -17.652417115 | 0 | 1 | 1 | # | oh |
| 2422 | 1 | 3 | -1.050000 | 4.667081651  | -17.814223030 | -15.603517583 | 0 | 1 | 1 | # | ob |
| 2423 | 1 | 4 | -0.950000 | 4.587607657  | -13.362709004 | -17.652417115 | 0 | 1 | 1 | # | oh |
| 2424 | 1 | 3 | -1.050000 | 2.078731651  | -13.359673030 | -15.603517583 | 0 | 1 | 1 | # | ob |
| 2425 | 1 | 4 | -0.950000 | 3.177442343  | -8.910040996  | 17.652417115  | 0 | 1 | 0 | # | oh |
| 2426 | 1 | 3 | -1.050000 | 0.509618349  | -8.913076970  | 15.603517583  | 0 | 1 | 0 | # | ob |
| 2427 | 1 | 4 | -0.950000 | 0.589092343  | -13.364590996 | 17.652417115  | 0 | 1 | 0 | # | oh |
| 2428 | 1 | 3 | -1.050000 | 3.097968349  | -13.367626970 | 15.603517583  | 0 | 1 | 0 | # | ob |
| 2429 | 1 | 3 | -1.050000 | 4.194805513  | -16.137299320 | -17.631368622 | 0 | 1 | 1 | # | ob |
| 2430 | 1 | 3 | -1.050000 | 0.153510908  | -11.503260300 | -15.431920289 | 0 | 1 | 1 | # | ob |
| 2431 | 1 | 3 | -1.050000 | 3.569664655  | -11.686148519 | 17.631577932  | 0 | 1 | 0 | # | ob |
| 2432 | 1 | 3 | -1.050000 | 2.435167264  | -15.967653874 | 15.433153738  | 0 | 1 | 0 | # | ob |
| 2433 | 1 | 5 | 2.100000  | 4.222997014  | -16.291080796 | -16.002222830 | 0 | 1 | 1 | # | st |
| 2434 | 1 | 5 | 2.100000  | 3.542027774  | -11.844829218 | 16.003201903  | 0 | 1 | 0 | # | st |
| 2435 | 1 | 5 | 2.100000  | 0.953702986  | -10.436219204 | 16.002222830  | 0 | 1 | 0 | # | st |
| 2436 | 1 | 5 | 2.100000  | 3.542052986  | -14.890769204 | 16.002222830  | 0 | 1 | 0 | # | st |
| 2437 | 1 | 5 | 2.100000  | 4.223022226  | -10.427920782 | -16.003201903 | 0 | 1 | 1 | # | st |
| 2438 | 1 | 5 | 2.100000  | 1.634672226  | -14.882470782 | -16.003201903 | 0 | 1 | 1 | # | st |
| 2439 | 1 | 5 | 2.100000  | 1.634647014  | -11.836530796 | -16.002222830 | 0 | 1 | 1 | # | st |
| 2440 | 1 | 5 | 2.100000  | 0.953677774  | -16.299379218 | 16.003201903  | 0 | 1 | 0 | # | st |
| 2441 | 1 | 1 | 1.575000  | 7.765255029  | -16.343538432 | -18.664729368 | 0 | 1 | 1 | # | ao |
| 2442 | 1 | 1 | 1.575000  | 5.176905029  | -11.888988432 | -18.664729368 | 0 | 1 | 1 | # | ao |
| 2443 | 1 | 1 | 1.575000  | 7.764844971  | -10.383761568 | 18.664729368  | 0 | 1 | 0 | # | ao |
| 2444 | 1 | 1 | 1.575000  | 10.353194971 | -14.838311568 | 18.664729368  | 0 | 1 | 0 | # | ao |
| 2445 | 1 | 2 | 0.425000  | 8.911350872  | -13.360932678 | -17.178884937 | 0 | 1 | 1 | # | ho |

|      |   |   |           |               |               |               |   |   |   |   |    |
|------|---|---|-----------|---------------|---------------|---------------|---|---|---|---|----|
| 2446 | 1 | 2 | 0.425000  | 6.323000872   | -17.815482678 | -17.178884937 | 0 | 1 | 1 | # | ho |
| 2447 | 1 | 2 | 0.425000  | 6.618749128   | -13.366367322 | 17.178884937  | 0 | 1 | 0 | # | ho |
| 2448 | 1 | 2 | 0.425000  | 9.207099128   | -8.911817322  | 17.178884937  | 0 | 1 | 0 | # | ho |
| 2449 | 1 | 3 | -1.050000 | 6.158014655   | -16.140698519 | 17.631577932  | 0 | 1 | 0 | # | ob |
| 2450 | 1 | 3 | -1.050000 | 10.200217264  | -11.513103874 | 15.433153738  | 0 | 1 | 0 | # | ob |
| 2451 | 1 | 3 | -1.050000 | 8.746944487   | -15.044550680 | 17.631368622  | 0 | 1 | 0 | # | ob |
| 2452 | 1 | 3 | -1.050000 | 7.611539092   | -10.769489700 | 15.431920289  | 0 | 1 | 0 | # | ob |
| 2453 | 1 | 3 | -1.050000 | 6.158594487   | -10.590000680 | 17.631368622  | 0 | 1 | 0 | # | ob |
| 2454 | 1 | 3 | -1.050000 | 6.783155513   | -11.682749320 | -17.631368622 | 0 | 1 | 1 | # | ob |
| 2455 | 1 | 3 | -1.050000 | 10.199889092  | -15.224039700 | 15.431920289  | 0 | 1 | 0 | # | ob |
| 2456 | 1 | 3 | -1.050000 | 6.783735345   | -15.041151481 | -17.631577932 | 0 | 1 | 1 | # | ob |
| 2457 | 1 | 3 | -1.050000 | 7.918232736   | -10.759646126 | -15.433153738 | 0 | 1 | 1 | # | ob |
| 2458 | 1 | 3 | -1.050000 | 9.372085345   | -10.586601481 | -17.631577932 | 0 | 1 | 1 | # | ob |
| 2459 | 1 | 3 | -1.050000 | 5.329882736   | -15.214196126 | -15.433153738 | 0 | 1 | 1 | # | ob |
| 2460 | 1 | 3 | -1.050000 | 7.918560908   | -15.957810300 | -15.431920289 | 0 | 1 | 1 | # | ob |
| 2461 | 1 | 4 | -0.950000 | 7.175957657   | -17.817259004 | -17.652417115 | 0 | 1 | 1 | # | oh |
| 2462 | 1 | 3 | -1.050000 | 9.843781651   | -17.814223030 | -15.603517583 | 0 | 1 | 1 | # | ob |
| 2463 | 1 | 4 | -0.950000 | 9.764307657   | -13.362709004 | -17.652417115 | 0 | 1 | 1 | # | oh |
| 2464 | 1 | 3 | -1.050000 | 7.255431651   | -13.359673030 | -15.603517583 | 0 | 1 | 1 | # | ob |
| 2465 | 1 | 4 | -0.950000 | 8.354142343   | -8.910040996  | 17.652417115  | 0 | 1 | 0 | # | oh |
| 2466 | 1 | 3 | -1.050000 | 5.686318349   | -8.913076970  | 15.603517583  | 0 | 1 | 0 | # | ob |
| 2467 | 1 | 4 | -0.950000 | 5.765792343   | -13.364590996 | 17.652417115  | 0 | 1 | 0 | # | oh |
| 2468 | 1 | 3 | -1.050000 | 8.274668349   | -13.367626970 | 15.603517583  | 0 | 1 | 0 | # | ob |
| 2469 | 1 | 3 | -1.050000 | 9.371505513   | -16.137299320 | -17.631368622 | 0 | 1 | 1 | # | ob |
| 2470 | 1 | 3 | -1.050000 | 5.330210908   | -11.503260300 | -15.431920289 | 0 | 1 | 1 | # | ob |
| 2471 | 1 | 3 | -1.050000 | 8.746364655   | -11.686148519 | 17.631577932  | 0 | 1 | 0 | # | ob |
| 2472 | 1 | 3 | -1.050000 | 7.611867264   | -15.967653874 | 15.433153738  | 0 | 1 | 0 | # | ob |
| 2473 | 1 | 5 | 2.100000  | 9.399697014   | -16.291080796 | -16.002222830 | 0 | 1 | 1 | # | st |
| 2474 | 1 | 5 | 2.100000  | 8.718727774   | -11.844829218 | 16.003201903  | 0 | 1 | 0 | # | st |
| 2475 | 1 | 5 | 2.100000  | 6.130402986   | -10.436219204 | 16.002222830  | 0 | 1 | 0 | # | st |
| 2476 | 1 | 5 | 2.100000  | 8.718752986   | -14.890769204 | 16.002222830  | 0 | 1 | 0 | # | st |
| 2477 | 1 | 5 | 2.100000  | 9.399722226   | -10.427920782 | -16.003201903 | 0 | 1 | 1 | # | st |
| 2478 | 1 | 5 | 2.100000  | 6.811372226   | -14.882470782 | -16.003201903 | 0 | 1 | 1 | # | st |
| 2479 | 1 | 5 | 2.100000  | 6.811347014   | -11.836530796 | -16.002222830 | 0 | 1 | 1 | # | st |
| 2480 | 1 | 5 | 2.100000  | 6.130377774   | -16.299379218 | 16.003201903  | 0 | 1 | 0 | # | st |
| 2481 | 1 | 1 | 1.575000  | 12.941955029  | -16.343538432 | -18.664729368 | 0 | 1 | 1 | # | ao |
| 2482 | 1 | 1 | 1.575000  | 10.353605029  | -11.888988432 | -18.664729368 | 0 | 1 | 1 | # | ao |
| 2483 | 1 | 1 | 1.575000  | 12.941544971  | -10.383761568 | 18.664729368  | 0 | 1 | 0 | # | ao |
| 2484 | 1 | 1 | 1.575000  | 15.529894971  | -14.838311568 | 18.664729368  | 0 | 1 | 0 | # | ao |
| 2485 | 1 | 2 | 0.425000  | 14.088050872  | -13.360932678 | -17.178884937 | 0 | 1 | 1 | # | ho |
| 2486 | 1 | 2 | 0.425000  | 11.499700872  | -17.815482678 | -17.178884937 | 0 | 1 | 1 | # | ho |
| 2487 | 1 | 2 | 0.425000  | 11.795449128  | -13.366367322 | 17.178884937  | 0 | 1 | 0 | # | ho |
| 2488 | 1 | 2 | 0.425000  | 14.383799128  | -8.911817322  | 17.178884937  | 0 | 1 | 0 | # | ho |
| 2489 | 1 | 3 | -1.050000 | 11.334714655  | -16.140698519 | 17.631577932  | 0 | 1 | 0 | # | ob |
| 2490 | 1 | 3 | -1.050000 | 15.376917264  | -11.513103874 | 15.433153738  | 0 | 1 | 0 | # | ob |
| 2491 | 1 | 3 | -1.050000 | 13.923644487  | -15.044550680 | 17.631368622  | 0 | 1 | 0 | # | ob |
| 2492 | 1 | 3 | -1.050000 | 12.788239092  | -10.769489700 | 15.431920289  | 0 | 1 | 0 | # | ob |
| 2493 | 1 | 3 | -1.050000 | 11.335294487  | -10.590000680 | 17.631368622  | 0 | 1 | 0 | # | ob |
| 2494 | 1 | 3 | -1.050000 | 11.959855513  | -11.682749320 | -17.631368622 | 0 | 1 | 1 | # | ob |
| 2495 | 1 | 3 | -1.050000 | 15.376589092  | -15.224039700 | 15.431920289  | 0 | 1 | 0 | # | ob |
| 2496 | 1 | 3 | -1.050000 | 11.960435345  | -15.041151481 | -17.631577932 | 0 | 1 | 1 | # | ob |
| 2497 | 1 | 3 | -1.050000 | 13.094932736  | -10.759646126 | -15.433153738 | 0 | 1 | 1 | # | ob |
| 2498 | 1 | 3 | -1.050000 | 14.548785345  | -10.586601481 | -17.631577932 | 0 | 1 | 1 | # | ob |
| 2499 | 1 | 3 | -1.050000 | 10.506582736  | -15.214196126 | -15.433153738 | 0 | 1 | 1 | # | ob |
| 2500 | 1 | 3 | -1.050000 | 13.095260908  | -15.957810300 | -15.431920289 | 0 | 1 | 1 | # | ob |
| 2501 | 1 | 4 | -0.950000 | 12.352657657  | -17.817259004 | -17.652417115 | 0 | 1 | 1 | # | oh |
| 2502 | 1 | 3 | -1.050000 | 15.020481651  | -17.814223030 | -15.603517583 | 0 | 1 | 1 | # | ob |
| 2503 | 1 | 4 | -0.950000 | 14.941007657  | -13.362709004 | -17.652417115 | 0 | 1 | 1 | # | oh |
| 2504 | 1 | 3 | -1.050000 | 12.432131651  | -13.359673030 | -15.603517583 | 0 | 1 | 1 | # | ob |
| 2505 | 1 | 4 | -0.950000 | 13.530842343  | -8.910040996  | 17.652417115  | 0 | 1 | 0 | # | oh |
| 2506 | 1 | 3 | -1.050000 | 10.863018349  | -8.913076970  | 15.603517583  | 0 | 1 | 0 | # | ob |
| 2507 | 1 | 4 | -0.950000 | 10.942492343  | -13.364590996 | 17.652417115  | 0 | 1 | 0 | # | oh |
| 2508 | 1 | 3 | -1.050000 | 13.451368349  | -13.367626970 | 15.603517583  | 0 | 1 | 0 | # | ob |
| 2509 | 1 | 3 | -1.050000 | 14.548205513  | -16.137299320 | -17.631368622 | 0 | 1 | 1 | # | ob |
| 2510 | 1 | 3 | -1.050000 | 10.506910908  | -11.503260300 | -15.431920289 | 0 | 1 | 1 | # | ob |
| 2511 | 1 | 3 | -1.050000 | 13.923064655  | -11.686148519 | 17.631577932  | 0 | 1 | 0 | # | ob |
| 2512 | 1 | 3 | -1.050000 | 12.788567264  | -15.967653874 | 15.433153738  | 0 | 1 | 0 | # | ob |
| 2513 | 1 | 5 | 2.100000  | 14.576397014  | -16.291080796 | -16.002222830 | 0 | 1 | 1 | # | st |
| 2514 | 1 | 5 | 2.100000  | 13.895427774  | -11.844829218 | 16.003201903  | 0 | 1 | 0 | # | st |
| 2515 | 1 | 5 | 2.100000  | 11.307102986  | -10.436219204 | 16.002222830  | 0 | 1 | 0 | # | st |
| 2516 | 1 | 5 | 2.100000  | 13.895452986  | -14.890769204 | 16.002222830  | 0 | 1 | 0 | # | st |
| 2517 | 1 | 5 | 2.100000  | 14.576422226  | -10.427920782 | -16.003201903 | 0 | 1 | 1 | # | st |
| 2518 | 1 | 5 | 2.100000  | 11.988072226  | -14.882470782 | -16.003201903 | 0 | 1 | 1 | # | st |
| 2519 | 1 | 5 | 2.100000  | 11.988047014  | -11.836530796 | -16.002222830 | 0 | 1 | 1 | # | st |
| 2520 | 1 | 5 | 2.100000  | 11.307077774  | -16.299379218 | 16.003201903  | 0 | 1 | 0 | # | st |
| 2521 | 1 | 1 | 1.575000  | -12.941544971 | -16.343538432 | -18.664729368 | 1 | 1 | 1 | # | ao |
| 2522 | 1 | 1 | 1.575000  | -15.529894971 | -11.888988432 | -18.664729368 | 1 | 1 | 1 | # | ao |
| 2523 | 1 | 1 | 1.575000  | -12.941955029 | -10.383761568 | 18.664729368  | 1 | 1 | 0 | # | ao |
| 2524 | 1 | 1 | 1.575000  | -10.353605029 | -14.838311568 | 18.664729368  | 1 | 1 | 0 | # | ao |
| 2525 | 1 | 2 | 0.425000  | -11.795449128 | -13.360932678 | -17.178884937 | 1 | 1 | 1 | # | ho |
| 2526 | 1 | 2 | 0.425000  | -14.383799128 | -17.815482678 | -17.178884937 | 1 | 1 | 1 | # | ho |
| 2527 | 1 | 2 | 0.425000  | -14.088050872 | -13.366367322 | 17.178884937  | 1 | 1 | 0 | # | ho |
| 2528 | 1 | 2 | 0.425000  | -11.499700872 | -8.911817322  | 17.178884937  | 1 | 1 | 0 | # | ho |
| 2529 | 1 | 3 | -1.050000 | -14.548785345 | -16.140698519 | 17.631577932  | 1 | 1 | 0 | # | ob |
| 2530 | 1 | 3 | -1.050000 | -10.506582736 | -11.513103874 | 15.433153738  | 1 | 1 | 0 | # | ob |
| 2531 | 1 | 3 | -1.050000 | -11.959855513 | -15.044550680 | 17.631368622  | 1 | 1 | 0 | # | ob |
| 2532 | 1 | 3 | -1.050000 | -13.095260908 | -10.769489700 | 15.431920289  | 1 | 1 | 0 | # | ob |
| 2533 | 1 | 3 | -1.050000 | -14.548205513 | -10.590000680 | 17.631368622  | 1 | 1 | 0 | # | ob |
| 2534 | 1 | 3 | -1.050000 | -13.923644487 | -11.682749320 | -17.631368622 | 1 | 1 | 1 | # | ob |
| 2535 | 1 | 3 | -1.050000 | -10.506910908 | -15.224039700 | 15.431920289  | 1 | 1 | 0 | # | ob |
| 2536 | 1 | 3 | -1.050000 | -13.923064655 | -15.041151481 | -17.631577932 | 1 | 1 | 1 | # | ob |
| 2537 | 1 | 3 | -1.050000 | -12.788567264 | -10.759646126 | -15.433153738 | 1 | 1 | 1 | # | ob |
| 2538 | 1 | 3 | -1.050000 | -11.334714655 | -10.586601481 | -17.631577932 | 1 | 1 | 1 | # | ob |

|      |   |   |           |               |               |               |   |   |   |   |    |
|------|---|---|-----------|---------------|---------------|---------------|---|---|---|---|----|
| 2539 | 1 | 3 | -1.050000 | -15.376917264 | -15.214196126 | -15.433153738 | 1 | 1 | 1 | # | ob |
| 2540 | 1 | 3 | -1.050000 | -12.788239092 | -15.957810300 | -15.431920289 | 1 | 1 | 1 | # | ob |
| 2541 | 1 | 4 | -0.950000 | -13.530842343 | -17.817259004 | -17.652417115 | 1 | 1 | 1 | # | oh |
| 2542 | 1 | 3 | -1.050000 | -10.863018349 | -17.814223030 | -15.603517583 | 1 | 1 | 1 | # | ob |
| 2543 | 1 | 4 | -0.950000 | -10.942492343 | -13.362709004 | -17.652417115 | 1 | 1 | 1 | # | oh |
| 2544 | 1 | 3 | -1.050000 | -13.451368349 | -13.359673030 | -15.603517583 | 1 | 1 | 1 | # | ob |
| 2545 | 1 | 4 | -0.950000 | -12.352657657 | -8.910040996  | 17.652417115  | 1 | 1 | 0 | # | oh |
| 2546 | 1 | 3 | -1.050000 | -15.020481651 | -8.913076970  | 15.603517583  | 1 | 1 | 0 | # | ob |
| 2547 | 1 | 4 | -0.950000 | -14.941007657 | -13.364590996 | 17.652417115  | 1 | 1 | 0 | # | oh |
| 2548 | 1 | 3 | -1.050000 | -12.432131651 | -13.367626970 | 15.603517583  | 1 | 1 | 0 | # | ob |
| 2549 | 1 | 3 | -1.050000 | -11.335294487 | -16.137299320 | -17.631368622 | 1 | 1 | 1 | # | ob |
| 2550 | 1 | 3 | -1.050000 | -15.376589092 | -11.503260300 | -15.431920289 | 1 | 1 | 1 | # | ob |
| 2551 | 1 | 3 | -1.050000 | -11.960435345 | -11.686148519 | 17.631577932  | 1 | 1 | 0 | # | ob |
| 2552 | 1 | 3 | -1.050000 | -13.094932736 | -15.967653874 | 15.433153738  | 1 | 1 | 0 | # | ob |
| 2553 | 1 | 5 | 2.100000  | -11.307102986 | -16.291080796 | -16.002222830 | 1 | 1 | 1 | # | st |
| 2554 | 1 | 5 | 2.100000  | -11.988072226 | -11.844829218 | 16.003201903  | 1 | 1 | 0 | # | st |
| 2555 | 1 | 5 | 2.100000  | -14.576397014 | -10.436219204 | 16.002222830  | 1 | 1 | 0 | # | st |
| 2556 | 1 | 5 | 2.100000  | -11.988047014 | -14.890769204 | 16.002222830  | 1 | 1 | 0 | # | st |
| 2557 | 1 | 5 | 2.100000  | -11.307077774 | -10.427920782 | -16.003201903 | 1 | 1 | 1 | # | st |
| 2558 | 1 | 5 | 2.100000  | -13.895427774 | -14.882470782 | -16.003201903 | 1 | 1 | 1 | # | st |
| 2559 | 1 | 5 | 2.100000  | -13.895452986 | -11.836530796 | -16.002222830 | 1 | 1 | 1 | # | st |
| 2560 | 1 | 5 | 2.100000  | -14.576422226 | -16.299379218 | 16.003201903  | 1 | 1 | 0 | # | st |
| 2561 | 1 | 1 | 1.575000  | -7.764844971  | -16.343538432 | -18.664729368 | 1 | 1 | 1 | # | ao |
| 2562 | 1 | 1 | 1.575000  | -10.353194971 | -11.888988432 | -18.664729368 | 1 | 1 | 1 | # | ao |
| 2563 | 1 | 1 | 1.575000  | -7.765255029  | -10.383761568 | 18.664729368  | 1 | 1 | 0 | # | ao |
| 2564 | 1 | 1 | 1.575000  | -5.176905029  | -14.838311568 | 18.664729368  | 1 | 1 | 0 | # | ao |
| 2565 | 1 | 2 | 0.425000  | -6.618749128  | -13.360932678 | -17.178884937 | 1 | 1 | 1 | # | ho |
| 2566 | 1 | 2 | 0.425000  | -9.207099128  | -17.815482678 | -17.178884937 | 1 | 1 | 1 | # | ho |
| 2567 | 1 | 2 | 0.425000  | -8.911350872  | -13.366367322 | 17.178884937  | 1 | 1 | 0 | # | ho |
| 2568 | 1 | 2 | 0.425000  | -6.323000872  | -8.911817322  | 17.178884937  | 1 | 1 | 0 | # | ho |
| 2569 | 1 | 3 | -1.050000 | -9.372085345  | -16.140698519 | 17.631577932  | 1 | 1 | 0 | # | ob |
| 2570 | 1 | 3 | -1.050000 | -5.329882736  | -11.513103874 | 15.433153738  | 1 | 1 | 0 | # | ob |
| 2571 | 1 | 3 | -1.050000 | -6.783155513  | -15.044550680 | 17.631368622  | 1 | 1 | 0 | # | ob |
| 2572 | 1 | 3 | -1.050000 | -7.918560908  | -10.769489700 | 15.431920289  | 1 | 1 | 0 | # | ob |
| 2573 | 1 | 3 | -1.050000 | -9.371505513  | -10.590000680 | 17.631368622  | 1 | 1 | 0 | # | ob |
| 2574 | 1 | 3 | -1.050000 | -8.746944487  | -11.682749320 | -17.631368622 | 1 | 1 | 1 | # | ob |
| 2575 | 1 | 3 | -1.050000 | -5.330210908  | -15.224039700 | 15.431920289  | 1 | 1 | 0 | # | ob |
| 2576 | 1 | 3 | -1.050000 | -8.746364655  | -15.041151481 | -17.631577932 | 1 | 1 | 1 | # | ob |
| 2577 | 1 | 3 | -1.050000 | -7.611867264  | -10.759646126 | -15.433153738 | 1 | 1 | 1 | # | ob |
| 2578 | 1 | 3 | -1.050000 | -6.158014655  | -10.586601481 | -17.631577932 | 1 | 1 | 1 | # | ob |
| 2579 | 1 | 3 | -1.050000 | -10.200217264 | -15.214196126 | -15.433153738 | 1 | 1 | 1 | # | ob |
| 2580 | 1 | 3 | -1.050000 | -7.611539092  | -15.957810300 | -15.431920289 | 1 | 1 | 1 | # | ob |
| 2581 | 1 | 4 | -0.950000 | -8.354142343  | -17.817259004 | -17.652417115 | 1 | 1 | 1 | # | oh |
| 2582 | 1 | 3 | -1.050000 | -5.686318349  | -17.814223030 | -15.603517583 | 1 | 1 | 1 | # | ob |
| 2583 | 1 | 4 | -0.950000 | -5.765792343  | -13.362709004 | -17.652417115 | 1 | 1 | 1 | # | oh |
| 2584 | 1 | 3 | -1.050000 | -8.274668349  | -13.359673030 | -15.603517583 | 1 | 1 | 1 | # | ob |
| 2585 | 1 | 4 | -0.950000 | -7.175957657  | -8.910040996  | 17.652417115  | 1 | 1 | 0 | # | oh |
| 2586 | 1 | 3 | -1.050000 | -9.843781651  | -8.913076970  | 15.603517583  | 1 | 1 | 0 | # | ob |
| 2587 | 1 | 4 | -0.950000 | -9.764307657  | -13.364590996 | 17.652417115  | 1 | 1 | 0 | # | oh |
| 2588 | 1 | 3 | -1.050000 | -7.255431651  | -13.367626970 | 15.603517583  | 1 | 1 | 0 | # | ob |
| 2589 | 1 | 3 | -1.050000 | -6.158594487  | -16.137299320 | -17.631368622 | 1 | 1 | 1 | # | ob |
| 2590 | 1 | 3 | -1.050000 | -10.199889092 | -11.503260300 | -15.431920289 | 1 | 1 | 1 | # | ob |
| 2591 | 1 | 3 | -1.050000 | -6.783735345  | -11.686148519 | 17.631577932  | 1 | 1 | 0 | # | ob |
| 2592 | 1 | 3 | -1.050000 | -7.918232736  | -15.967653874 | 15.433153738  | 1 | 1 | 0 | # | ob |
| 2593 | 1 | 5 | 2.100000  | -6.130402986  | -16.291080796 | -16.002222830 | 1 | 1 | 1 | # | st |
| 2594 | 1 | 5 | 2.100000  | -6.811372226  | -11.844829218 | 16.003201903  | 1 | 1 | 0 | # | st |
| 2595 | 1 | 5 | 2.100000  | -9.399697014  | -10.436219204 | 16.002222830  | 1 | 1 | 0 | # | st |
| 2596 | 1 | 5 | 2.100000  | -6.811347014  | -14.890769204 | 16.002222830  | 1 | 1 | 0 | # | st |
| 2597 | 1 | 5 | 2.100000  | -6.130377774  | -10.427920782 | -16.003201903 | 1 | 1 | 1 | # | st |
| 2598 | 1 | 5 | 2.100000  | -8.718727774  | -14.882470782 | -16.003201903 | 1 | 1 | 1 | # | st |
| 2599 | 1 | 5 | 2.100000  | -8.718752986  | -11.836530796 | -16.002222830 | 1 | 1 | 1 | # | st |
| 2600 | 1 | 5 | 2.100000  | -9.399722226  | -16.299379218 | 16.003201903  | 1 | 1 | 0 | # | st |
| 2601 | 1 | 1 | 1.575000  | -2.588144971  | -16.343538432 | -18.664729368 | 1 | 1 | 1 | # | ao |
| 2602 | 1 | 1 | 1.575000  | -5.176494971  | -11.888988432 | -18.664729368 | 1 | 1 | 1 | # | ao |
| 2603 | 1 | 1 | 1.575000  | -2.588555029  | -10.383761568 | 18.664729368  | 1 | 1 | 0 | # | ao |
| 2604 | 1 | 1 | 1.575000  | -0.000205029  | -14.838311568 | 18.664729368  | 1 | 1 | 0 | # | ao |
| 2605 | 1 | 2 | 0.425000  | -1.442049128  | -13.360932678 | -17.178884937 | 1 | 1 | 1 | # | ho |
| 2606 | 1 | 2 | 0.425000  | -4.030399128  | -17.815482678 | -17.178884937 | 1 | 1 | 1 | # | ho |
| 2607 | 1 | 2 | 0.425000  | -3.734650872  | -13.366367322 | 17.178884937  | 1 | 1 | 0 | # | ho |
| 2608 | 1 | 2 | 0.425000  | -1.146300872  | -8.911817322  | 17.178884937  | 1 | 1 | 0 | # | ho |
| 2609 | 1 | 3 | -1.050000 | -4.195385345  | -16.140698519 | 17.631577932  | 1 | 1 | 0 | # | ob |
| 2610 | 1 | 3 | -1.050000 | -0.153182736  | -11.513103874 | 15.433153738  | 1 | 1 | 0 | # | ob |
| 2611 | 1 | 3 | -1.050000 | -1.606455513  | -15.044550680 | 17.631368622  | 1 | 1 | 0 | # | ob |
| 2612 | 1 | 3 | -1.050000 | -2.741860908  | -10.769489700 | 15.431920289  | 1 | 1 | 0 | # | ob |
| 2613 | 1 | 3 | -1.050000 | -4.194805513  | -10.590000680 | 17.631368622  | 1 | 1 | 0 | # | ob |
| 2614 | 1 | 3 | -1.050000 | -3.570244487  | -11.682749320 | -17.631368622 | 1 | 1 | 1 | # | ob |
| 2615 | 1 | 3 | -1.050000 | -0.153510908  | -15.224039700 | 15.431920289  | 1 | 1 | 0 | # | ob |
| 2616 | 1 | 3 | -1.050000 | -3.569664655  | -15.041151481 | -17.631577932 | 1 | 1 | 1 | # | ob |
| 2617 | 1 | 3 | -1.050000 | -2.435167264  | -10.759646126 | -15.433153738 | 1 | 1 | 1 | # | ob |
| 2618 | 1 | 3 | -1.050000 | -0.981314655  | -10.586601481 | -17.631577932 | 1 | 1 | 1 | # | ob |
| 2619 | 1 | 3 | -1.050000 | -5.023517264  | -15.214196126 | -15.433153738 | 1 | 1 | 1 | # | ob |
| 2620 | 1 | 3 | -1.050000 | -2.434839092  | -15.957810300 | -15.431920289 | 1 | 1 | 1 | # | ob |
| 2621 | 1 | 4 | -0.950000 | -3.177442343  | -17.817259004 | -17.652417115 | 1 | 1 | 1 | # | oh |
| 2622 | 1 | 3 | -1.050000 | -0.509618349  | -17.814223030 | -15.603517583 | 1 | 1 | 1 | # | ob |
| 2623 | 1 | 4 | -0.950000 | -0.589092343  | -13.362709004 | -17.652417115 | 1 | 1 | 1 | # | oh |
| 2624 | 1 | 3 | -1.050000 | -3.097968349  | -13.359673030 | -15.603517583 | 1 | 1 | 1 | # | ob |
| 2625 | 1 | 4 | -0.950000 | -1.999257657  | -8.910040996  | 17.652417115  | 1 | 1 | 0 | # | oh |
| 2626 | 1 | 3 | -1.050000 | -4.667081651  | -8.913076970  | 15.603517583  | 1 | 1 | 0 | # | ob |
| 2627 | 1 | 4 | -0.950000 | -4.587607657  | -13.364590996 | 17.652417115  | 1 | 1 | 0 | # | oh |
| 2628 | 1 | 3 | -1.050000 | -2.078731651  | -13.367626970 | 15.603517583  | 1 | 1 | 0 | # | ob |
| 2629 | 1 | 3 | -1.050000 | -0.981894487  | -16.137299320 | -17.631368622 | 1 | 1 | 1 | # | ob |
| 2630 | 1 | 3 | -1.050000 | -5.023189092  | -11.503260300 | -15.431920289 | 1 | 1 | 1 | # | ob |
| 2631 | 1 | 3 | -1.050000 | -1.607035345  | -11.686148519 | 17.631577932  | 1 | 1 | 0 | # | ob |

|      |   |   |           |              |               |               |   |   |   |   |    |
|------|---|---|-----------|--------------|---------------|---------------|---|---|---|---|----|
| 2632 | 1 | 3 | -1.050000 | -2.741532736 | -15.967653874 | 15.433153738  | 1 | 1 | 0 | # | ob |
| 2633 | 1 | 5 | 2.100000  | -0.953702986 | -16.291080796 | -16.00222830  | 1 | 1 | 1 | # | st |
| 2634 | 1 | 5 | 2.100000  | -1.634672226 | -11.844829218 | 16.003201903  | 1 | 1 | 0 | # | st |
| 2635 | 1 | 5 | 2.100000  | -4.222997014 | -10.436219204 | 16.00222830   | 1 | 1 | 0 | # | st |
| 2636 | 1 | 5 | 2.100000  | -1.634647014 | -14.890769204 | 16.00222830   | 1 | 1 | 0 | # | st |
| 2637 | 1 | 5 | 2.100000  | -0.953677774 | -10.427920782 | -16.003201903 | 1 | 1 | 1 | # | st |
| 2638 | 1 | 5 | 2.100000  | -3.542027774 | -14.882470782 | -16.003201903 | 1 | 1 | 1 | # | st |
| 2639 | 1 | 5 | 2.100000  | -3.542052986 | -11.836530796 | -16.00222830  | 1 | 1 | 1 | # | st |
| 2640 | 1 | 5 | 2.100000  | -4.223022226 | -16.299379218 | 16.003201903  | 1 | 1 | 0 | # | st |
| 2641 | 1 | 1 | 1.575000  | 2.588555029  | -7.434438432  | -18.664729368 | 0 | 1 | 1 | # | ao |
| 2642 | 1 | 1 | 1.575000  | 0.000205029  | -2.979888432  | -18.664729368 | 0 | 1 | 1 | # | ao |
| 2643 | 1 | 1 | 1.575000  | 2.588144971  | -1.474661568  | 18.664729368  | 0 | 1 | 0 | # | ao |
| 2644 | 1 | 1 | 1.575000  | 5.176494971  | -5.929211568  | 18.664729368  | 0 | 1 | 0 | # | ao |
| 2645 | 1 | 2 | 0.425000  | 3.734650872  | -4.451832678  | -17.178884937 | 0 | 1 | 1 | # | ho |
| 2646 | 1 | 2 | 0.425000  | 1.146300872  | -8.906382678  | -17.178884937 | 0 | 1 | 1 | # | ho |
| 2647 | 1 | 2 | 0.425000  | 1.442049128  | -4.457267322  | 17.178884937  | 0 | 1 | 0 | # | ho |
| 2648 | 1 | 2 | 0.425000  | 4.030399128  | -0.002717322  | 17.178884937  | 0 | 1 | 0 | # | ho |
| 2649 | 1 | 3 | -1.050000 | 0.981314655  | -7.231598519  | 17.631577932  | 0 | 1 | 0 | # | ob |
| 2650 | 1 | 3 | -1.050000 | 5.023517264  | -2.604003874  | 15.433153738  | 0 | 1 | 0 | # | ob |
| 2651 | 1 | 3 | -1.050000 | 3.570244487  | -6.135450680  | 17.631368622  | 0 | 1 | 0 | # | ob |
| 2652 | 1 | 3 | -1.050000 | 2.434839092  | -1.860389700  | 15.431920289  | 0 | 1 | 0 | # | ob |
| 2653 | 1 | 3 | -1.050000 | 0.981894487  | -1.680900680  | 17.631368622  | 0 | 1 | 0 | # | ob |
| 2654 | 1 | 3 | -1.050000 | 1.606455513  | -2.773649320  | -17.631368622 | 0 | 1 | 1 | # | ob |
| 2655 | 1 | 3 | -1.050000 | 5.023189092  | -6.314939700  | 15.431920289  | 0 | 1 | 0 | # | ob |
| 2656 | 1 | 3 | -1.050000 | 1.607035345  | -6.132051481  | -17.631577932 | 0 | 1 | 1 | # | ob |
| 2657 | 1 | 3 | -1.050000 | 2.741532736  | -1.850546126  | -15.433153738 | 0 | 1 | 1 | # | ob |
| 2658 | 1 | 3 | -1.050000 | 4.195385345  | -1.677501481  | -17.631577932 | 0 | 1 | 1 | # | ob |
| 2659 | 1 | 3 | -1.050000 | 0.153182736  | -6.305096126  | -15.433153738 | 0 | 1 | 1 | # | ob |
| 2660 | 1 | 3 | -1.050000 | 2.741860908  | -7.048710300  | -15.431920289 | 0 | 1 | 1 | # | ob |
| 2661 | 1 | 4 | -0.950000 | 1.999257657  | -8.908159004  | -17.652417115 | 0 | 1 | 1 | # | ob |
| 2662 | 1 | 3 | -1.050000 | 4.667081651  | -8.905123030  | -15.603517583 | 0 | 1 | 1 | # | ob |
| 2663 | 1 | 4 | -0.950000 | 4.587607657  | -4.453609004  | -17.652417115 | 0 | 1 | 1 | # | ob |
| 2664 | 1 | 3 | -1.050000 | 2.078731651  | -4.450573030  | -15.603517583 | 0 | 1 | 1 | # | ob |
| 2665 | 1 | 4 | -0.950000 | 3.177442343  | -0.000940996  | 17.652417115  | 0 | 1 | 0 | # | oh |
| 2666 | 1 | 3 | -1.050000 | 0.509618349  | -0.003976970  | 15.603517583  | 0 | 1 | 0 | # | ob |
| 2667 | 1 | 4 | -0.950000 | 0.589092343  | -4.455490996  | 17.652417115  | 0 | 1 | 0 | # | oh |
| 2668 | 1 | 3 | -1.050000 | 3.097968349  | -4.458526970  | 15.603517583  | 0 | 1 | 0 | # | ob |
| 2669 | 1 | 3 | -1.050000 | 4.194805513  | -7.228199320  | -17.631368622 | 0 | 1 | 1 | # | ob |
| 2670 | 1 | 3 | -1.050000 | 0.153510908  | -2.594160300  | -15.431920289 | 0 | 1 | 1 | # | ob |
| 2671 | 1 | 3 | -1.050000 | 3.569664655  | -2.777048519  | 17.631577932  | 0 | 1 | 0 | # | ob |
| 2672 | 1 | 3 | -1.050000 | 2.435167264  | -7.058553874  | 15.433153738  | 0 | 1 | 0 | # | ob |
| 2673 | 1 | 5 | 2.100000  | 4.222997014  | -7.381980796  | -16.00222830  | 0 | 1 | 1 | # | st |
| 2674 | 1 | 5 | 2.100000  | 3.542027774  | -2.935729218  | 16.003201903  | 0 | 1 | 0 | # | st |
| 2675 | 1 | 5 | 2.100000  | 0.953702986  | -1.527119204  | 16.00222830   | 0 | 1 | 0 | # | st |
| 2676 | 1 | 5 | 2.100000  | 3.542052986  | -5.981669204  | 16.00222830   | 0 | 1 | 0 | # | st |
| 2677 | 1 | 5 | 2.100000  | 4.223022226  | -1.518820782  | -16.003201903 | 0 | 1 | 1 | # | st |
| 2678 | 1 | 5 | 2.100000  | 1.634672226  | -5.973370782  | -16.003201903 | 0 | 1 | 1 | # | st |
| 2679 | 1 | 5 | 2.100000  | 1.634647014  | -2.927430796  | -16.00222830  | 0 | 1 | 1 | # | st |
| 2680 | 1 | 5 | 2.100000  | 0.953677774  | -7.390279218  | 16.003201903  | 0 | 1 | 0 | # | st |
| 2681 | 1 | 1 | 1.575000  | 7.765255029  | -7.434438432  | -18.664729368 | 0 | 1 | 1 | # | ao |
| 2682 | 1 | 1 | 1.575000  | 5.176905029  | -2.979888432  | -18.664729368 | 0 | 1 | 1 | # | ao |
| 2683 | 1 | 1 | 1.575000  | 7.764844971  | -1.474661568  | 18.664729368  | 0 | 1 | 0 | # | ao |
| 2684 | 1 | 1 | 1.575000  | 10.353194971 | -5.929211568  | 18.664729368  | 0 | 1 | 0 | # | ao |
| 2685 | 1 | 2 | 0.425000  | 8.911350872  | -4.451832678  | -17.178884937 | 0 | 1 | 1 | # | ho |
| 2686 | 1 | 2 | 0.425000  | 6.323000872  | -8.906382678  | -17.178884937 | 0 | 1 | 1 | # | ho |
| 2687 | 1 | 2 | 0.425000  | 6.618749128  | -4.457267322  | 17.178884937  | 0 | 1 | 0 | # | ho |
| 2688 | 1 | 2 | 0.425000  | 9.207099128  | -0.002717322  | 17.178884937  | 0 | 1 | 0 | # | ho |
| 2689 | 1 | 3 | -1.050000 | 6.158014655  | -7.231598519  | 17.631577932  | 0 | 1 | 0 | # | ob |
| 2690 | 1 | 3 | -1.050000 | 10.200217264 | -2.604003874  | 15.433153738  | 0 | 1 | 0 | # | ob |
| 2691 | 1 | 3 | -1.050000 | 8.746944487  | -6.135450680  | 17.631368622  | 0 | 1 | 0 | # | ob |
| 2692 | 1 | 3 | -1.050000 | 7.611539092  | -1.860389700  | 15.431920289  | 0 | 1 | 0 | # | ob |
| 2693 | 1 | 3 | -1.050000 | 6.158594487  | -1.680900680  | 17.631368622  | 0 | 1 | 0 | # | ob |
| 2694 | 1 | 3 | -1.050000 | 6.783155513  | -2.773649320  | -17.631368622 | 0 | 1 | 1 | # | ob |
| 2695 | 1 | 3 | -1.050000 | 10.199889092 | -6.314939700  | 15.431920289  | 0 | 1 | 0 | # | ob |
| 2696 | 1 | 3 | -1.050000 | 6.783735345  | -6.132051481  | -17.631577932 | 0 | 1 | 1 | # | ob |
| 2697 | 1 | 3 | -1.050000 | 7.918232736  | -1.850546126  | -15.433153738 | 0 | 1 | 1 | # | ob |
| 2698 | 1 | 3 | -1.050000 | 9.372085345  | -1.677501481  | -17.631577932 | 0 | 1 | 1 | # | ob |
| 2699 | 1 | 3 | -1.050000 | 5.329882736  | -6.305096126  | -15.433153738 | 0 | 1 | 1 | # | ob |
| 2700 | 1 | 3 | -1.050000 | 7.918560908  | -7.048710300  | -15.431920289 | 0 | 1 | 1 | # | ob |
| 2701 | 1 | 4 | -0.950000 | 7.175957657  | -8.908159004  | -17.652417115 | 0 | 1 | 1 | # | ob |
| 2702 | 1 | 3 | -1.050000 | 9.843781651  | -8.905123030  | -15.603517583 | 0 | 1 | 1 | # | ob |
| 2703 | 1 | 4 | -0.950000 | 9.764307657  | -4.453609004  | -17.652417115 | 0 | 1 | 1 | # | ob |
| 2704 | 1 | 3 | -1.050000 | 7.255431651  | -4.450573030  | -15.603517583 | 0 | 1 | 1 | # | ob |
| 2705 | 1 | 4 | -0.950000 | 8.354142343  | -0.000940996  | 17.652417115  | 0 | 1 | 0 | # | oh |
| 2706 | 1 | 3 | -1.050000 | 5.686318349  | -0.003976970  | 15.603517583  | 0 | 1 | 0 | # | ob |
| 2707 | 1 | 4 | -0.950000 | 5.765792343  | -4.455490996  | 17.652417115  | 0 | 1 | 0 | # | oh |
| 2708 | 1 | 3 | -1.050000 | 8.274668349  | -4.458526970  | 15.603517583  | 0 | 1 | 0 | # | ob |
| 2709 | 1 | 3 | -1.050000 | 9.371505513  | -7.228199320  | -17.631368622 | 0 | 1 | 1 | # | ob |
| 2710 | 1 | 3 | -1.050000 | 5.330210908  | -2.594160300  | -15.431920289 | 0 | 1 | 1 | # | ob |
| 2711 | 1 | 3 | -1.050000 | 8.746364655  | -2.777048519  | 17.631577932  | 0 | 1 | 0 | # | ob |
| 2712 | 1 | 3 | -1.050000 | 7.611867264  | -7.058553874  | 15.433153738  | 0 | 1 | 0 | # | ob |
| 2713 | 1 | 5 | 2.100000  | 9.399697014  | -7.381980796  | -16.00222830  | 0 | 1 | 1 | # | st |
| 2714 | 1 | 5 | 2.100000  | 8.718727774  | -2.935729218  | 16.003201903  | 0 | 1 | 0 | # | st |
| 2715 | 1 | 5 | 2.100000  | 6.130402986  | -1.527119204  | 16.00222830   | 0 | 1 | 0 | # | st |
| 2716 | 1 | 5 | 2.100000  | 8.718752986  | -5.981669204  | 16.00222830   | 0 | 1 | 0 | # | st |
| 2717 | 1 | 5 | 2.100000  | 9.399722226  | -1.518820782  | -16.003201903 | 0 | 1 | 1 | # | st |
| 2718 | 1 | 5 | 2.100000  | 6.811372226  | -5.973370782  | -16.003201903 | 0 | 1 | 1 | # | st |
| 2719 | 1 | 5 | 2.100000  | 6.811347014  | -2.927430796  | -16.00222830  | 0 | 1 | 1 | # | st |
| 2720 | 1 | 5 | 2.100000  | 6.130377774  | -7.390279218  | 16.003201903  | 0 | 1 | 0 | # | st |
| 2721 | 1 | 1 | 1.575000  | 12.941955029 | -7.434438432  | -18.664729368 | 0 | 1 | 1 | # | ao |
| 2722 | 1 | 1 | 1.575000  | 10.353605029 | -2.979888432  | -18.664729368 | 0 | 1 | 1 | # | ao |
| 2723 | 1 | 1 | 1.575000  | 12.941544971 | -1.474661568  | 18.664729368  | 0 | 1 | 0 | # | ao |
| 2724 | 1 | 1 | 1.575000  | 15.529894971 | -5.929211568  | 18.664729368  | 0 | 1 | 0 | # | ao |

|      |   |   |           |               |              |               |   |   |   |   |    |
|------|---|---|-----------|---------------|--------------|---------------|---|---|---|---|----|
| 2725 | 1 | 2 | 0.425000  | 14.088050872  | -4.451832678 | -17.178884937 | 0 | 1 | 1 | # | ho |
| 2726 | 1 | 2 | 0.425000  | 11.499700872  | -8.906382678 | -17.178884937 | 0 | 1 | 1 | # | ho |
| 2727 | 1 | 2 | 0.425000  | 11.795449128  | -4.457267322 | 17.178884937  | 0 | 1 | 0 | # | ho |
| 2728 | 1 | 2 | 0.425000  | 14.383799128  | -0.002717322 | 17.178884937  | 0 | 1 | 0 | # | ho |
| 2729 | 1 | 3 | -1.050000 | 11.334714655  | -7.231598519 | 17.631577932  | 0 | 1 | 0 | # | ob |
| 2730 | 1 | 3 | -1.050000 | 15.376917264  | -2.604003874 | 15.433153738  | 0 | 1 | 0 | # | ob |
| 2731 | 1 | 3 | -1.050000 | 13.923644487  | -6.135450680 | 17.631368622  | 0 | 1 | 0 | # | ob |
| 2732 | 1 | 3 | -1.050000 | 12.788239092  | -1.860389700 | 15.431920289  | 0 | 1 | 0 | # | ob |
| 2733 | 1 | 3 | -1.050000 | 11.335294487  | -1.680900680 | 17.631368622  | 0 | 1 | 0 | # | ob |
| 2734 | 1 | 3 | -1.050000 | 11.959855513  | -2.773649320 | -17.631368622 | 0 | 1 | 1 | # | ob |
| 2735 | 1 | 3 | -1.050000 | 15.376589092  | -6.314939700 | 15.431920289  | 0 | 1 | 0 | # | ob |
| 2736 | 1 | 3 | -1.050000 | 11.960435345  | -6.132051481 | -17.631577932 | 0 | 1 | 1 | # | ob |
| 2737 | 1 | 3 | -1.050000 | 13.094932736  | -1.850546126 | -15.433153738 | 0 | 1 | 1 | # | ob |
| 2738 | 1 | 3 | -1.050000 | 14.548785345  | -1.677501481 | -17.631577932 | 0 | 1 | 1 | # | ob |
| 2739 | 1 | 3 | -1.050000 | 10.506582736  | -6.305096126 | -15.433153738 | 0 | 1 | 1 | # | ob |
| 2740 | 1 | 3 | -1.050000 | 13.095260908  | -7.048710300 | -15.431920289 | 0 | 1 | 1 | # | ob |
| 2741 | 1 | 4 | -0.950000 | 12.352657657  | -8.908159004 | -17.652417115 | 0 | 1 | 1 | # | oh |
| 2742 | 1 | 3 | -1.050000 | 15.020481651  | -8.905123030 | -15.603517583 | 0 | 1 | 1 | # | ob |
| 2743 | 1 | 4 | -0.950000 | 14.941007657  | -4.453609004 | -17.652417115 | 0 | 1 | 1 | # | oh |
| 2744 | 1 | 3 | -1.050000 | 12.432131651  | -4.450573030 | -15.603517583 | 0 | 1 | 1 | # | ob |
| 2745 | 1 | 4 | -0.950000 | 13.530842343  | -0.000940996 | 17.652417115  | 0 | 1 | 0 | # | oh |
| 2746 | 1 | 3 | -1.050000 | 10.863018349  | -0.003976970 | 15.603517583  | 0 | 1 | 0 | # | ob |
| 2747 | 1 | 4 | -0.950000 | 10.942492343  | -4.455490996 | 17.652417115  | 0 | 1 | 0 | # | oh |
| 2748 | 1 | 3 | -1.050000 | 13.451368349  | -4.458526970 | 15.603517583  | 0 | 1 | 0 | # | ob |
| 2749 | 1 | 3 | -1.050000 | 14.548205513  | -7.228199320 | -17.631368622 | 0 | 1 | 1 | # | ob |
| 2750 | 1 | 3 | -1.050000 | 10.506910908  | -2.594160300 | -15.431920289 | 0 | 1 | 1 | # | ob |
| 2751 | 1 | 3 | -1.050000 | 13.923064655  | -2.777048519 | 17.631577932  | 0 | 1 | 0 | # | ob |
| 2752 | 1 | 3 | -1.050000 | 12.788567264  | -7.058553874 | 15.433153738  | 0 | 1 | 0 | # | ob |
| 2753 | 1 | 5 | 2.100000  | 14.576397014  | -7.381980796 | -16.002222830 | 0 | 1 | 1 | # | st |
| 2754 | 1 | 5 | 2.100000  | 13.895427774  | -2.935729218 | 16.003201903  | 0 | 1 | 0 | # | st |
| 2755 | 1 | 5 | 2.100000  | 11.307102986  | -1.527119204 | 16.002222830  | 0 | 1 | 0 | # | st |
| 2756 | 1 | 5 | 2.100000  | 13.895452986  | -5.981669204 | 16.002222830  | 0 | 1 | 0 | # | st |
| 2757 | 1 | 5 | 2.100000  | 14.576422226  | -1.518820782 | -16.003201903 | 0 | 1 | 1 | # | st |
| 2758 | 1 | 5 | 2.100000  | 11.988072226  | -5.973370782 | -16.003201903 | 0 | 1 | 1 | # | st |
| 2759 | 1 | 5 | 2.100000  | 11.988047014  | -2.927430796 | -16.002222830 | 0 | 1 | 1 | # | st |
| 2760 | 1 | 5 | 2.100000  | 11.307077774  | -7.390279218 | 16.003201903  | 0 | 1 | 0 | # | st |
| 2761 | 1 | 1 | 1.575000  | -12.941544971 | -7.434438432 | -18.664729368 | 1 | 1 | 1 | # | ao |
| 2762 | 1 | 1 | 1.575000  | -15.529894971 | -2.979888432 | -18.664729368 | 1 | 1 | 1 | # | ao |
| 2763 | 1 | 1 | 1.575000  | -12.941955029 | -1.474661568 | 18.664729368  | 1 | 1 | 0 | # | ao |
| 2764 | 1 | 1 | 1.575000  | -10.353605029 | -5.929211568 | 18.664729368  | 1 | 1 | 0 | # | ao |
| 2765 | 1 | 2 | 0.425000  | -11.795449128 | -4.451832678 | -17.178884937 | 1 | 1 | 1 | # | ho |
| 2766 | 1 | 2 | 0.425000  | -14.383799128 | -8.906382678 | -17.178884937 | 1 | 1 | 1 | # | ho |
| 2767 | 1 | 2 | 0.425000  | -14.088050872 | -4.457267322 | 17.178884937  | 1 | 1 | 0 | # | ho |
| 2768 | 1 | 2 | 0.425000  | -11.499700872 | -0.002717322 | 17.178884937  | 1 | 1 | 0 | # | ho |
| 2769 | 1 | 3 | -1.050000 | -14.548785345 | -7.231598519 | 17.631577932  | 1 | 1 | 0 | # | ob |
| 2770 | 1 | 3 | -1.050000 | -10.506582736 | -2.604003874 | 15.433153738  | 1 | 1 | 0 | # | ob |
| 2771 | 1 | 3 | -1.050000 | -11.959855513 | -6.135450680 | 17.631368622  | 1 | 1 | 0 | # | ob |
| 2772 | 1 | 3 | -1.050000 | -13.095260908 | -1.860389700 | 15.431920289  | 1 | 1 | 0 | # | ob |
| 2773 | 1 | 3 | -1.050000 | -14.548205513 | -1.680900680 | 17.631368622  | 1 | 1 | 0 | # | ob |
| 2774 | 1 | 3 | -1.050000 | -13.923644487 | -2.773649320 | -17.631368622 | 1 | 1 | 1 | # | ob |
| 2775 | 1 | 3 | -1.050000 | -10.506910908 | -6.314939700 | 15.431920289  | 1 | 1 | 0 | # | ob |
| 2776 | 1 | 3 | -1.050000 | -13.923064655 | -6.132051481 | -17.631577932 | 1 | 1 | 1 | # | ob |
| 2777 | 1 | 3 | -1.050000 | -12.788567264 | -1.850546126 | -15.433153738 | 1 | 1 | 1 | # | ob |
| 2778 | 1 | 3 | -1.050000 | -11.334714655 | -1.677501481 | -17.631577932 | 1 | 1 | 1 | # | ob |
| 2779 | 1 | 3 | -1.050000 | -15.376917264 | -6.305096126 | -15.433153738 | 1 | 1 | 1 | # | ob |
| 2780 | 1 | 3 | -1.050000 | -12.788239092 | -7.048710300 | -15.431920289 | 1 | 1 | 1 | # | ob |
| 2781 | 1 | 4 | -0.950000 | -13.530842343 | -8.908159004 | -17.652417115 | 1 | 1 | 1 | # | oh |
| 2782 | 1 | 3 | -1.050000 | -10.863018349 | -8.905123030 | -15.603517583 | 1 | 1 | 1 | # | ob |
| 2783 | 1 | 4 | -0.950000 | -10.942492343 | -4.453609004 | -17.652417115 | 1 | 1 | 1 | # | oh |
| 2784 | 1 | 3 | -1.050000 | -13.451368349 | -4.450573030 | -15.603517583 | 1 | 1 | 1 | # | ob |
| 2785 | 1 | 4 | -0.950000 | -12.352657657 | -0.000940996 | 17.652417115  | 1 | 1 | 0 | # | oh |
| 2786 | 1 | 3 | -1.050000 | -15.020481651 | -0.003976970 | 15.603517583  | 1 | 1 | 0 | # | ob |
| 2787 | 1 | 4 | -0.950000 | -14.941007657 | -4.455490996 | 17.652417115  | 1 | 1 | 0 | # | oh |
| 2788 | 1 | 3 | -1.050000 | -12.432131651 | -4.458526970 | 15.603517583  | 1 | 1 | 0 | # | ob |
| 2789 | 1 | 3 | -1.050000 | -11.335294487 | -7.228199320 | -17.631368622 | 1 | 1 | 1 | # | ob |
| 2790 | 1 | 3 | -1.050000 | -15.376589092 | -6.314939700 | -15.431920289 | 1 | 1 | 1 | # | ob |
| 2791 | 1 | 3 | -1.050000 | -11.960435345 | -2.777048519 | 17.631577932  | 1 | 1 | 0 | # | ob |
| 2792 | 1 | 3 | -1.050000 | -13.094932736 | -7.058553874 | 15.433153738  | 1 | 1 | 0 | # | ob |
| 2793 | 1 | 5 | 2.100000  | -11.307102986 | -7.381980796 | -16.002222830 | 1 | 1 | 1 | # | st |
| 2794 | 1 | 5 | 2.100000  | -11.988072226 | -2.935729218 | 16.003201903  | 1 | 1 | 0 | # | st |
| 2795 | 1 | 5 | 2.100000  | -14.576397014 | -1.527119204 | 16.002222830  | 1 | 1 | 0 | # | st |
| 2796 | 1 | 5 | 2.100000  | -11.988047014 | -5.981669204 | 16.002222830  | 1 | 1 | 0 | # | st |
| 2797 | 1 | 5 | 2.100000  | -11.307077774 | -1.518820782 | -16.003201903 | 1 | 1 | 1 | # | st |
| 2798 | 1 | 5 | 2.100000  | -13.895427774 | -5.973370782 | -16.003201903 | 1 | 1 | 1 | # | st |
| 2799 | 1 | 5 | 2.100000  | -13.895452986 | -2.927430796 | -16.002222830 | 1 | 1 | 1 | # | st |
| 2800 | 1 | 5 | 2.100000  | -14.576422226 | -7.390279218 | 16.003201903  | 1 | 1 | 0 | # | st |
| 2801 | 1 | 1 | 1.575000  | -7.764844971  | -7.434438432 | -18.664729368 | 1 | 1 | 1 | # | ao |
| 2802 | 1 | 1 | 1.575000  | -10.353194971 | -2.979888432 | -18.664729368 | 1 | 1 | 1 | # | ao |
| 2803 | 1 | 1 | 1.575000  | -7.765255029  | -1.474661568 | 18.664729368  | 1 | 1 | 0 | # | ao |
| 2804 | 1 | 1 | 1.575000  | -5.176905029  | -5.929211568 | 18.664729368  | 1 | 1 | 0 | # | ao |
| 2805 | 1 | 2 | 0.425000  | -6.618749128  | -4.451832678 | -17.178884937 | 1 | 1 | 1 | # | ho |
| 2806 | 1 | 2 | 0.425000  | -9.207099128  | -8.906382678 | -17.178884937 | 1 | 1 | 1 | # | ho |
| 2807 | 1 | 2 | 0.425000  | -8.911350872  | -4.457267322 | 17.178884937  | 1 | 1 | 0 | # | ho |
| 2808 | 1 | 2 | 0.425000  | -6.323000872  | -0.002717322 | 17.178884937  | 1 | 1 | 0 | # | ho |
| 2809 | 1 | 3 | -1.050000 | -9.372085345  | -7.231598519 | 17.631577932  | 1 | 1 | 0 | # | ob |
| 2810 | 1 | 3 | -1.050000 | -5.329882736  | -2.604003874 | 15.433153738  | 1 | 1 | 0 | # | ob |
| 2811 | 1 | 3 | -1.050000 | -6.783155513  | -6.135450680 | 17.631368622  | 1 | 1 | 0 | # | ob |
| 2812 | 1 | 3 | -1.050000 | -7.918560908  | -1.860389700 | 15.431920289  | 1 | 1 | 0 | # | ob |
| 2813 | 1 | 3 | -1.050000 | -9.371505513  | -1.680900680 | 17.631368622  | 1 | 1 | 0 | # | ob |
| 2814 | 1 | 3 | -1.050000 | -8.746944487  | -2.773649320 | -17.631368622 | 1 | 1 | 1 | # | ob |
| 2815 | 1 | 3 | -1.050000 | -5.330210908  | -6.314939700 | 15.431920289  | 1 | 1 | 0 | # | ob |
| 2816 | 1 | 3 | -1.050000 | -8.746364655  | -6.132051481 | -17.631577932 | 1 | 1 | 1 | # | ob |
| 2817 | 1 | 3 | -1.050000 | -7.611867264  | -1.850546126 | -15.433153738 | 1 | 1 | 1 | # | ob |

|      |   |   |           |               |              |               |   |   |   |   |    |
|------|---|---|-----------|---------------|--------------|---------------|---|---|---|---|----|
| 2818 | 1 | 3 | -1.050000 | -6.158014655  | -1.677501481 | -17.631577932 | 1 | 1 | 1 | # | ob |
| 2819 | 1 | 3 | -1.050000 | -10.200217264 | -6.305096126 | -15.433153738 | 1 | 1 | 1 | # | ob |
| 2820 | 1 | 3 | -1.050000 | -7.611539092  | -7.048710300 | -15.431920289 | 1 | 1 | 1 | # | ob |
| 2821 | 1 | 4 | -0.950000 | -8.354142343  | -8.908159004 | -17.652417115 | 1 | 1 | 1 | # | oh |
| 2822 | 1 | 3 | -1.050000 | -5.686318349  | -8.905123030 | -15.603517583 | 1 | 1 | 1 | # | ob |
| 2823 | 1 | 4 | -0.950000 | -5.765792343  | -4.453609004 | -17.652417115 | 1 | 1 | 1 | # | oh |
| 2824 | 1 | 3 | -1.050000 | -8.274668349  | -4.450573030 | -15.603517583 | 1 | 1 | 1 | # | ob |
| 2825 | 1 | 4 | -0.950000 | -7.175957657  | -0.000940996 | 17.652417115  | 1 | 1 | 0 | # | oh |
| 2826 | 1 | 3 | -1.050000 | -9.843781651  | -0.003976970 | 15.603517583  | 1 | 1 | 0 | # | ob |
| 2827 | 1 | 4 | -0.950000 | -9.764307657  | -4.455490996 | 17.652417115  | 1 | 1 | 0 | # | oh |
| 2828 | 1 | 3 | -1.050000 | -7.255431651  | -4.458526970 | 15.603517583  | 1 | 1 | 0 | # | ob |
| 2829 | 1 | 3 | -1.050000 | -6.158594487  | -7.228199320 | -17.631368622 | 1 | 1 | 1 | # | ob |
| 2830 | 1 | 3 | -1.050000 | -10.199889092 | -2.594160300 | -15.431920289 | 1 | 1 | 1 | # | ob |
| 2831 | 1 | 3 | -1.050000 | -6.783735345  | -2.777048519 | 17.631577932  | 1 | 1 | 0 | # | ob |
| 2832 | 1 | 3 | -1.050000 | -7.918232736  | -7.058553874 | 15.433153738  | 1 | 1 | 0 | # | ob |
| 2833 | 1 | 5 | 2.100000  | -6.130402986  | -7.381980796 | -16.00222830  | 1 | 1 | 1 | # | st |
| 2834 | 1 | 5 | 2.100000  | -6.811372226  | -2.935729218 | 16.003201903  | 1 | 1 | 0 | # | st |
| 2835 | 1 | 5 | 2.100000  | -9.399697014  | -1.527119204 | 16.00222830   | 1 | 1 | 0 | # | st |
| 2836 | 1 | 5 | 2.100000  | -6.811347014  | -5.981669204 | 16.00222830   | 1 | 1 | 0 | # | st |
| 2837 | 1 | 5 | 2.100000  | -6.130377774  | -1.518820782 | -16.003201903 | 1 | 1 | 1 | # | st |
| 2838 | 1 | 5 | 2.100000  | -8.718727774  | -5.973370782 | -16.003201903 | 1 | 1 | 1 | # | st |
| 2839 | 1 | 5 | 2.100000  | -8.718752986  | -2.927430796 | -16.00222830  | 1 | 1 | 1 | # | st |
| 2840 | 1 | 5 | 2.100000  | -9.399722226  | -7.390279218 | 16.003201903  | 1 | 1 | 0 | # | st |
| 2841 | 1 | 1 | 1.575000  | -2.588144971  | -7.434438432 | -18.664729368 | 1 | 1 | 1 | # | ao |
| 2842 | 1 | 1 | 1.575000  | -5.176494971  | -2.979888432 | -18.664729368 | 1 | 1 | 1 | # | ao |
| 2843 | 1 | 1 | 1.575000  | -2.588555029  | -1.474661568 | 18.664729368  | 1 | 1 | 0 | # | ao |
| 2844 | 1 | 1 | 1.575000  | -0.000205029  | -5.929211568 | 18.664729368  | 1 | 1 | 0 | # | ao |
| 2845 | 1 | 2 | 0.425000  | -1.442049128  | -4.451832678 | -17.178884937 | 1 | 1 | 1 | # | ho |
| 2846 | 1 | 2 | 0.425000  | -4.030399128  | -8.906382678 | -17.178884937 | 1 | 1 | 1 | # | ho |
| 2847 | 1 | 2 | 0.425000  | -3.734650872  | -4.457267322 | 17.178884937  | 1 | 1 | 0 | # | ho |
| 2848 | 1 | 2 | 0.425000  | -1.146300872  | -0.002717322 | 17.178884937  | 1 | 1 | 0 | # | ho |
| 2849 | 1 | 3 | -1.050000 | -4.195385345  | -7.231598519 | 17.631577932  | 1 | 1 | 0 | # | ob |
| 2850 | 1 | 3 | -1.050000 | -0.153182736  | -2.604003874 | 15.433153738  | 1 | 1 | 0 | # | ob |
| 2851 | 1 | 3 | -1.050000 | -1.606455513  | -6.135450680 | 17.631368622  | 1 | 1 | 0 | # | ob |
| 2852 | 1 | 3 | -1.050000 | -2.741860908  | -1.860389700 | 15.431920289  | 1 | 1 | 0 | # | ob |
| 2853 | 1 | 3 | -1.050000 | -4.194805513  | -1.680900680 | 17.631368622  | 1 | 1 | 0 | # | ob |
| 2854 | 1 | 3 | -1.050000 | -3.570244487  | -2.773649320 | -17.631368622 | 1 | 1 | 1 | # | ob |
| 2855 | 1 | 3 | -1.050000 | -0.153510908  | -6.314939700 | 15.431920289  | 1 | 1 | 0 | # | ob |
| 2856 | 1 | 3 | -1.050000 | -3.569664655  | -6.132051481 | -17.631577932 | 1 | 1 | 1 | # | ob |
| 2857 | 1 | 3 | -1.050000 | -2.435167264  | -1.850546126 | -15.433153738 | 1 | 1 | 1 | # | ob |
| 2858 | 1 | 3 | -1.050000 | -0.981314655  | -1.677501481 | -17.631577932 | 1 | 1 | 1 | # | ob |
| 2859 | 1 | 3 | -1.050000 | -5.023517264  | -6.305096126 | -15.433153738 | 1 | 1 | 1 | # | ob |
| 2860 | 1 | 3 | -1.050000 | -2.434839092  | -7.048710300 | -15.431920289 | 1 | 1 | 1 | # | ob |
| 2861 | 1 | 4 | -0.950000 | -3.177442343  | -8.908159004 | -17.652417115 | 1 | 1 | 1 | # | oh |
| 2862 | 1 | 3 | -1.050000 | -0.509618349  | -8.905123030 | -15.603517583 | 1 | 1 | 1 | # | ob |
| 2863 | 1 | 4 | -0.950000 | -0.589092343  | -4.453609004 | -17.652417115 | 1 | 1 | 1 | # | oh |
| 2864 | 1 | 3 | -1.050000 | -3.097968349  | -4.450573030 | -15.603517583 | 1 | 1 | 1 | # | ob |
| 2865 | 1 | 4 | -0.950000 | -1.999257657  | -0.000940996 | 17.652417115  | 1 | 1 | 0 | # | oh |
| 2866 | 1 | 3 | -1.050000 | -4.667081651  | -0.003976970 | 15.603517583  | 1 | 1 | 0 | # | ob |
| 2867 | 1 | 4 | -0.950000 | -4.587607657  | -4.455490996 | 17.652417115  | 1 | 1 | 0 | # | oh |
| 2868 | 1 | 3 | -1.050000 | -2.078731651  | -4.458526970 | 15.603517583  | 1 | 1 | 0 | # | ob |
| 2869 | 1 | 3 | -1.050000 | -0.981894487  | -7.228199320 | -17.631368622 | 1 | 1 | 1 | # | ob |
| 2870 | 1 | 3 | -1.050000 | -5.023189092  | -2.594160300 | -15.431920289 | 1 | 1 | 1 | # | ob |
| 2871 | 1 | 3 | -1.050000 | -1.607035345  | -2.777048519 | 17.631577932  | 1 | 1 | 0 | # | ob |
| 2872 | 1 | 3 | -1.050000 | -2.741532736  | -7.058553874 | 15.433153738  | 1 | 1 | 0 | # | ob |
| 2873 | 1 | 5 | 2.100000  | -0.953702986  | -7.381980796 | -16.00222830  | 1 | 1 | 1 | # | st |
| 2874 | 1 | 5 | 2.100000  | -1.634672226  | -2.935729218 | 16.003201903  | 1 | 1 | 0 | # | st |
| 2875 | 1 | 5 | 2.100000  | -4.222997014  | -1.527119204 | 16.00222830   | 1 | 1 | 0 | # | st |
| 2876 | 1 | 5 | 2.100000  | -1.634647014  | -5.981669204 | 16.00222830   | 1 | 1 | 0 | # | st |
| 2877 | 1 | 5 | 2.100000  | -0.953677774  | -1.518820782 | -16.003201903 | 1 | 1 | 1 | # | st |
| 2878 | 1 | 5 | 2.100000  | -3.542027774  | -5.973370782 | -16.003201903 | 1 | 1 | 1 | # | st |
| 2879 | 1 | 5 | 2.100000  | -3.542052986  | -2.927430796 | -16.00222830  | 1 | 1 | 1 | # | st |
| 2880 | 1 | 5 | 2.100000  | -4.223022226  | -7.390279218 | 16.003201903  | 1 | 1 | 0 | # | st |
| 2881 | 1 | 1 | 1.575000  | 2.588555029   | 1.474661568  | -9.332229368  | 0 | 0 | 1 | # | ao |
| 2882 | 1 | 1 | 1.575000  | 0.000205029   | 5.929211568  | -9.332229368  | 0 | 0 | 1 | # | ao |
| 2883 | 1 | 1 | 1.575000  | 2.588144971   | 7.434438432  | -9.332770632  | 0 | 0 | 1 | # | ao |
| 2884 | 1 | 1 | 1.575000  | 5.176494971   | 2.979888432  | -9.332770632  | 0 | 0 | 1 | # | ao |
| 2885 | 1 | 2 | 0.425000  | 3.734650872   | 4.457267322  | -7.846384937  | 0 | 0 | 1 | # | ho |
| 2886 | 1 | 2 | 0.425000  | 1.146300872   | 0.002717322  | -7.846384937  | 0 | 0 | 1 | # | ho |
| 2887 | 1 | 2 | 0.425000  | 1.442049128   | 4.451832678  | -10.818615063 | 0 | 0 | 1 | # | ho |
| 2888 | 1 | 2 | 0.425000  | 4.030399128   | 8.906382678  | -10.818615063 | 0 | 0 | 1 | # | ho |
| 2889 | 1 | 3 | -1.050000 | 0.981314655   | 1.677501481  | -10.365922068 | 0 | 0 | 1 | # | ob |
| 2890 | 1 | 3 | -1.050000 | 5.023517264   | 6.305096126  | -12.564346262 | 0 | 0 | 1 | # | ob |
| 2891 | 1 | 3 | -1.050000 | 3.570244487   | 2.773649320  | -10.366131378 | 0 | 0 | 1 | # | ob |
| 2892 | 1 | 3 | -1.050000 | 2.434839092   | 7.048710300  | -12.565579711 | 0 | 0 | 1 | # | ob |
| 2893 | 1 | 3 | -1.050000 | 0.981894487   | 7.228199320  | -10.366131378 | 0 | 0 | 1 | # | ob |
| 2894 | 1 | 3 | -1.050000 | 1.606455513   | 6.135450680  | -8.298868622  | 0 | 0 | 1 | # | ob |
| 2895 | 1 | 3 | -1.050000 | 5.023189092   | 2.594160300  | -12.565579711 | 0 | 0 | 1 | # | ob |
| 2896 | 1 | 3 | -1.050000 | 1.607035345   | 2.777048519  | -8.299077932  | 0 | 0 | 1 | # | ob |
| 2897 | 1 | 3 | -1.050000 | 2.741532736   | 7.058553874  | -6.100653738  | 0 | 0 | 1 | # | ob |
| 2898 | 1 | 3 | -1.050000 | 4.195385345   | 7.231598519  | -8.299077932  | 0 | 0 | 1 | # | ob |
| 2899 | 1 | 3 | -1.050000 | 0.153182736   | 2.604003874  | -6.100653738  | 0 | 0 | 1 | # | ob |
| 2900 | 1 | 3 | -1.050000 | 2.741860908   | 1.860389700  | -6.099420289  | 0 | 0 | 1 | # | ob |
| 2901 | 1 | 4 | -0.950000 | 1.999257657   | 0.000940996  | -8.319917115  | 0 | 0 | 1 | # | oh |
| 2902 | 1 | 3 | -1.050000 | 4.667081651   | 0.003976970  | -6.271017583  | 0 | 0 | 1 | # | ob |
| 2903 | 1 | 4 | -0.950000 | 4.587607657   | 4.455490996  | -8.319917115  | 0 | 0 | 1 | # | oh |
| 2904 | 1 | 3 | -1.050000 | 2.078731651   | 4.458526970  | -6.271017583  | 0 | 0 | 1 | # | ob |
| 2905 | 1 | 4 | -0.950000 | 3.177442343   | 8.908159004  | -10.345082885 | 0 | 0 | 1 | # | oh |
| 2906 | 1 | 3 | -1.050000 | 0.509618349   | 8.905123030  | -12.393982417 | 0 | 0 | 1 | # | ob |
| 2907 | 1 | 4 | -0.950000 | 0.589092343   | 4.453609004  | -10.345082885 | 0 | 0 | 1 | # | oh |
| 2908 | 1 | 3 | -1.050000 | 3.097968349   | 4.450573030  | -12.393982417 | 0 | 0 | 1 | # | ob |
| 2909 | 1 | 3 | -1.050000 | 4.194805513   | 1.680900680  | -8.298868622  | 0 | 0 | 1 | # | ob |
| 2910 | 1 | 3 | -1.050000 | 0.153510908   | 6.314939700  | -6.099420289  | 0 | 0 | 1 | # | ob |

|      |   |   |           |               |             |               |   |   |   |   |    |
|------|---|---|-----------|---------------|-------------|---------------|---|---|---|---|----|
| 2911 | 1 | 3 | -1.050000 | 3.569664655   | 6.132051481 | -10.365922068 | 0 | 0 | 1 | # | ob |
| 2912 | 1 | 3 | -1.050000 | 2.435167264   | 1.850546126 | -12.564346262 | 0 | 0 | 1 | # | ob |
| 2913 | 1 | 5 | 2.100000  | 4.222997014   | 1.527119204 | -6.669722830  | 0 | 0 | 1 | # | st |
| 2914 | 1 | 5 | 2.100000  | 3.542027774   | 5.973370782 | -11.994298097 | 0 | 0 | 1 | # | st |
| 2915 | 1 | 5 | 2.100000  | 0.953702986   | 7.381980796 | -11.995277170 | 0 | 0 | 1 | # | st |
| 2916 | 1 | 5 | 2.100000  | 3.542052986   | 2.927430796 | -11.995277170 | 0 | 0 | 1 | # | st |
| 2917 | 1 | 5 | 2.100000  | 4.223022226   | 7.390279218 | -6.670701903  | 0 | 0 | 1 | # | st |
| 2918 | 1 | 5 | 2.100000  | 1.634672226   | 2.935729218 | -6.670701903  | 0 | 0 | 1 | # | st |
| 2919 | 1 | 5 | 2.100000  | 1.634647014   | 5.981669204 | -6.669722830  | 0 | 0 | 1 | # | st |
| 2920 | 1 | 5 | 2.100000  | 0.953677774   | 1.518820782 | -11.994298097 | 0 | 0 | 1 | # | st |
| 2921 | 1 | 1 | 1.575000  | 7.765255029   | 1.474661568 | -9.332229368  | 0 | 0 | 1 | # | ao |
| 2922 | 1 | 1 | 1.575000  | 5.176905029   | 5.929211568 | -9.332229368  | 0 | 0 | 1 | # | ao |
| 2923 | 1 | 1 | 1.575000  | 7.764844971   | 7.434438432 | -9.332770632  | 0 | 0 | 1 | # | ao |
| 2924 | 1 | 1 | 1.575000  | 10.353194971  | 2.979888432 | -9.332770632  | 0 | 0 | 1 | # | ao |
| 2925 | 1 | 2 | 0.425000  | 8.911350872   | 4.457267322 | -7.846384937  | 0 | 0 | 1 | # | ho |
| 2926 | 1 | 2 | 0.425000  | 6.323000872   | 0.002717322 | -7.846384937  | 0 | 0 | 1 | # | ho |
| 2927 | 1 | 2 | 0.425000  | 6.618749128   | 4.451832678 | -10.818615063 | 0 | 0 | 1 | # | ho |
| 2928 | 1 | 2 | 0.425000  | 9.207099128   | 8.906382678 | -10.818615063 | 0 | 0 | 1 | # | ho |
| 2929 | 1 | 3 | -1.050000 | 6.158014655   | 1.677501481 | -10.365922068 | 0 | 0 | 1 | # | ob |
| 2930 | 1 | 3 | -1.050000 | 10.200217264  | 6.305096126 | -12.564346262 | 0 | 0 | 1 | # | ob |
| 2931 | 1 | 3 | -1.050000 | 8.746944487   | 2.773649320 | -10.366131378 | 0 | 0 | 1 | # | ob |
| 2932 | 1 | 3 | -1.050000 | 7.611539092   | 7.048710300 | -12.565579711 | 0 | 0 | 1 | # | ob |
| 2933 | 1 | 3 | -1.050000 | 6.158594487   | 7.228199320 | -10.366131378 | 0 | 0 | 1 | # | ob |
| 2934 | 1 | 3 | -1.050000 | 6.783155513   | 6.135450680 | -8.298868622  | 0 | 0 | 1 | # | ob |
| 2935 | 1 | 3 | -1.050000 | 10.199889092  | 2.594160300 | -12.565579711 | 0 | 0 | 1 | # | ob |
| 2936 | 1 | 3 | -1.050000 | 6.783735345   | 2.777048519 | -8.299077932  | 0 | 0 | 1 | # | ob |
| 2937 | 1 | 3 | -1.050000 | 7.918232736   | 7.058553874 | -6.100653738  | 0 | 0 | 1 | # | ob |
| 2938 | 1 | 3 | -1.050000 | 9.372085345   | 7.231598519 | -8.299077932  | 0 | 0 | 1 | # | ob |
| 2939 | 1 | 3 | -1.050000 | 5.329882736   | 2.604003874 | -6.100653738  | 0 | 0 | 1 | # | ob |
| 2940 | 1 | 3 | -1.050000 | 7.918560908   | 1.860389700 | -6.099420289  | 0 | 0 | 1 | # | ob |
| 2941 | 1 | 4 | -0.950000 | 7.175957657   | 0.000940996 | -8.319917115  | 0 | 0 | 1 | # | oh |
| 2942 | 1 | 3 | -1.050000 | 9.843781651   | 0.003976970 | -6.271017583  | 0 | 0 | 1 | # | ob |
| 2943 | 1 | 4 | -0.950000 | 9.764307657   | 4.455490996 | -8.319917115  | 0 | 0 | 1 | # | oh |
| 2944 | 1 | 3 | -1.050000 | 7.255431651   | 4.458526970 | -6.271017583  | 0 | 0 | 1 | # | ob |
| 2945 | 1 | 4 | -0.950000 | 8.354142343   | 8.908159004 | -10.345082885 | 0 | 0 | 1 | # | oh |
| 2946 | 1 | 3 | -1.050000 | 5.686318349   | 8.905123030 | -12.393982417 | 0 | 0 | 1 | # | ob |
| 2947 | 1 | 4 | -0.950000 | 5.765792343   | 4.453609004 | -10.345082885 | 0 | 0 | 1 | # | oh |
| 2948 | 1 | 3 | -1.050000 | 8.274668349   | 4.450573030 | -12.393982417 | 0 | 0 | 1 | # | ob |
| 2949 | 1 | 3 | -1.050000 | 9.371505513   | 1.680900680 | -8.298868622  | 0 | 0 | 1 | # | ob |
| 2950 | 1 | 3 | -1.050000 | 5.330210908   | 6.314939700 | -6.099420289  | 0 | 0 | 1 | # | ob |
| 2951 | 1 | 3 | -1.050000 | 8.746364655   | 6.132051481 | -10.365922068 | 0 | 0 | 1 | # | ob |
| 2952 | 1 | 3 | -1.050000 | 7.611867264   | 1.850546126 | -12.564346262 | 0 | 0 | 1 | # | ob |
| 2953 | 1 | 5 | 2.100000  | 9.399697014   | 1.527119204 | -6.669722830  | 0 | 0 | 1 | # | st |
| 2954 | 1 | 5 | 2.100000  | 8.718727774   | 5.973370782 | -11.994298097 | 0 | 0 | 1 | # | st |
| 2955 | 1 | 5 | 2.100000  | 6.130402986   | 7.381980796 | -11.995277170 | 0 | 0 | 1 | # | st |
| 2956 | 1 | 5 | 2.100000  | 8.718752986   | 2.927430796 | -11.995277170 | 0 | 0 | 1 | # | st |
| 2957 | 1 | 5 | 2.100000  | 9.399722226   | 7.390279218 | -6.670701903  | 0 | 0 | 1 | # | st |
| 2958 | 1 | 5 | 2.100000  | 6.811372226   | 2.935729218 | -6.670701903  | 0 | 0 | 1 | # | st |
| 2959 | 1 | 5 | 2.100000  | 6.811347014   | 5.981669204 | -6.669722830  | 0 | 0 | 1 | # | st |
| 2960 | 1 | 5 | 2.100000  | 6.130377774   | 1.518820782 | -11.994298097 | 0 | 0 | 1 | # | st |
| 2961 | 1 | 1 | 1.575000  | 12.941955029  | 1.474661568 | -9.332229368  | 0 | 0 | 1 | # | ao |
| 2962 | 1 | 1 | 1.575000  | 10.353605029  | 5.929211568 | -9.332229368  | 0 | 0 | 1 | # | ao |
| 2963 | 1 | 1 | 1.575000  | 12.941544971  | 7.434438432 | -9.332770632  | 0 | 0 | 1 | # | ao |
| 2964 | 1 | 1 | 1.575000  | 15.529894971  | 2.979888432 | -9.332770632  | 0 | 0 | 1 | # | ao |
| 2965 | 1 | 2 | 0.425000  | 14.088050872  | 4.457267322 | -7.846384937  | 0 | 0 | 1 | # | ho |
| 2966 | 1 | 2 | 0.425000  | 11.499700872  | 0.002717322 | -7.846384937  | 0 | 0 | 1 | # | ho |
| 2967 | 1 | 2 | 0.425000  | 11.795449128  | 4.451832678 | -10.818615063 | 0 | 0 | 1 | # | ho |
| 2968 | 1 | 2 | 0.425000  | 14.383799128  | 8.906382678 | -10.818615063 | 0 | 0 | 1 | # | ho |
| 2969 | 1 | 3 | -1.050000 | 11.334714655  | 1.677501481 | -10.365922068 | 0 | 0 | 1 | # | ob |
| 2970 | 1 | 3 | -1.050000 | 15.376917264  | 6.305096126 | -12.564346262 | 0 | 0 | 1 | # | ob |
| 2971 | 1 | 3 | -1.050000 | 13.923644487  | 2.773649320 | -10.366131378 | 0 | 0 | 1 | # | ob |
| 2972 | 1 | 3 | -1.050000 | 12.788239092  | 7.048710300 | -12.565579711 | 0 | 0 | 1 | # | ob |
| 2973 | 1 | 3 | -1.050000 | 11.335294487  | 7.228199320 | -10.366131378 | 0 | 0 | 1 | # | ob |
| 2974 | 1 | 3 | -1.050000 | 11.959855513  | 6.135450680 | -8.298868622  | 0 | 0 | 1 | # | ob |
| 2975 | 1 | 3 | -1.050000 | 15.376589092  | 2.594160300 | -12.565579711 | 0 | 0 | 1 | # | ob |
| 2976 | 1 | 3 | -1.050000 | 11.960435345  | 2.777048519 | -8.299077932  | 0 | 0 | 1 | # | ob |
| 2977 | 1 | 3 | -1.050000 | 13.094932736  | 7.058553874 | -6.100653738  | 0 | 0 | 1 | # | ob |
| 2978 | 1 | 3 | -1.050000 | 14.548785345  | 7.231598519 | -8.299077932  | 0 | 0 | 1 | # | ob |
| 2979 | 1 | 3 | -1.050000 | 10.506582736  | 2.604003874 | -6.100653738  | 0 | 0 | 1 | # | ob |
| 2980 | 1 | 3 | -1.050000 | 13.095260908  | 1.860389700 | -6.099420289  | 0 | 0 | 1 | # | ob |
| 2981 | 1 | 4 | -0.950000 | 12.352657657  | 0.000940996 | -8.319917115  | 0 | 0 | 1 | # | oh |
| 2982 | 1 | 3 | -1.050000 | 15.020481651  | 0.003976970 | -6.271017583  | 0 | 0 | 1 | # | ob |
| 2983 | 1 | 4 | -0.950000 | 14.941007657  | 4.455490996 | -8.319917115  | 0 | 0 | 1 | # | oh |
| 2984 | 1 | 3 | -1.050000 | 12.432131651  | 4.458526970 | -6.271017583  | 0 | 0 | 1 | # | ob |
| 2985 | 1 | 4 | -0.950000 | 13.530842343  | 8.908159004 | -10.345082885 | 0 | 0 | 1 | # | oh |
| 2986 | 1 | 3 | -1.050000 | 10.863018349  | 8.905123030 | -12.393982417 | 0 | 0 | 1 | # | ob |
| 2987 | 1 | 4 | -0.950000 | 10.942492343  | 4.453609004 | -10.345082885 | 0 | 0 | 1 | # | oh |
| 2988 | 1 | 3 | -1.050000 | 13.451368349  | 4.450573030 | -12.393982417 | 0 | 0 | 1 | # | ob |
| 2989 | 1 | 3 | -1.050000 | 14.548205513  | 1.680900680 | -8.298868622  | 0 | 0 | 1 | # | ob |
| 2990 | 1 | 3 | -1.050000 | 10.506910908  | 6.314939700 | -6.099420289  | 0 | 0 | 1 | # | ob |
| 2991 | 1 | 3 | -1.050000 | 13.923064655  | 6.132051481 | -10.365922068 | 0 | 0 | 1 | # | ob |
| 2992 | 1 | 3 | -1.050000 | 12.788567264  | 1.850546126 | -12.564346262 | 0 | 0 | 1 | # | ob |
| 2993 | 1 | 5 | 2.100000  | 14.576397014  | 1.527119204 | -6.669722830  | 0 | 0 | 1 | # | st |
| 2994 | 1 | 5 | 2.100000  | 13.895427774  | 5.973370782 | -11.994298097 | 0 | 0 | 1 | # | st |
| 2995 | 1 | 5 | 2.100000  | 11.307102986  | 7.381980796 | -11.995277170 | 0 | 0 | 1 | # | st |
| 2996 | 1 | 5 | 2.100000  | 13.895452986  | 2.927430796 | -11.995277170 | 0 | 0 | 1 | # | st |
| 2997 | 1 | 5 | 2.100000  | 14.576422226  | 7.390279218 | -6.670701903  | 0 | 0 | 1 | # | st |
| 2998 | 1 | 5 | 2.100000  | 11.988072226  | 2.935729218 | -6.670701903  | 0 | 0 | 1 | # | st |
| 2999 | 1 | 5 | 2.100000  | 11.988047014  | 5.981669204 | -6.669722830  | 0 | 0 | 1 | # | st |
| 3000 | 1 | 5 | 2.100000  | 11.307077774  | 1.518820782 | -11.994298097 | 0 | 0 | 1 | # | st |
| 3001 | 1 | 1 | 1.575000  | -12.941544971 | 1.474661568 | -9.332229368  | 1 | 0 | 1 | # | ao |
| 3002 | 1 | 1 | 1.575000  | -15.529894971 | 5.929211568 | -9.332229368  | 1 | 0 | 1 | # | ao |
| 3003 | 1 | 1 | 1.575000  | -12.941955029 | 7.434438432 | -9.332770632  | 1 | 0 | 1 | # | ao |



|      |   |   |           |               |             |               |   |   |   |   |    |
|------|---|---|-----------|---------------|-------------|---------------|---|---|---|---|----|
| 3004 | 1 | 1 | 1.575000  | -10.353605029 | 2.979888432 | -9.332770632  | 1 | 0 | 1 | # | ao |
| 3005 | 1 | 2 | 0.425000  | -11.795449128 | 4.457267322 | -7.846384937  | 1 | 0 | 1 | # | ho |
| 3006 | 1 | 2 | 0.425000  | -14.383799128 | 0.002717322 | -7.846384937  | 1 | 0 | 1 | # | ho |
| 3007 | 1 | 2 | 0.425000  | -14.088050872 | 4.451832678 | -10.818615063 | 1 | 0 | 1 | # | ho |
| 3008 | 1 | 2 | 0.425000  | -11.499700872 | 8.906382678 | -10.818615063 | 1 | 0 | 1 | # | ho |
| 3009 | 1 | 3 | -1.050000 | -14.548785345 | 1.677501481 | -10.365922068 | 1 | 0 | 1 | # | ob |
| 3010 | 1 | 3 | -1.050000 | -10.506582736 | 6.305096126 | -12.564346262 | 1 | 0 | 1 | # | ob |
| 3011 | 1 | 3 | -1.050000 | -11.959855513 | 2.773649320 | -10.366131378 | 1 | 0 | 1 | # | ob |
| 3012 | 1 | 3 | -1.050000 | -13.095260908 | 7.048710300 | -12.565579711 | 1 | 0 | 1 | # | ob |
| 3013 | 1 | 3 | -1.050000 | -14.548205513 | 7.228199320 | -10.366131378 | 1 | 0 | 1 | # | ob |
| 3014 | 1 | 3 | -1.050000 | -13.923644487 | 6.135450680 | -8.298868622  | 1 | 0 | 1 | # | ob |
| 3015 | 1 | 3 | -1.050000 | -10.506910908 | 2.594160300 | -12.565579711 | 1 | 0 | 1 | # | ob |
| 3016 | 1 | 3 | -1.050000 | -13.923064655 | 2.777048519 | -8.299077932  | 1 | 0 | 1 | # | ob |
| 3017 | 1 | 3 | -1.050000 | -12.788567264 | 7.058553874 | -6.100653738  | 1 | 0 | 1 | # | ob |
| 3018 | 1 | 3 | -1.050000 | -11.334714655 | 7.231598519 | -8.299077932  | 1 | 0 | 1 | # | ob |
| 3019 | 1 | 3 | -1.050000 | -15.376917264 | 2.604003874 | -6.100653738  | 1 | 0 | 1 | # | ob |
| 3020 | 1 | 3 | -1.050000 | -12.788239092 | 1.860389700 | -6.099420289  | 1 | 0 | 1 | # | ob |
| 3021 | 1 | 4 | -0.950000 | -13.530842343 | 0.000940996 | -8.319917115  | 1 | 0 | 1 | # | oh |
| 3022 | 1 | 3 | -1.050000 | -10.863018349 | 0.003976970 | -6.271017583  | 1 | 0 | 1 | # | ob |
| 3023 | 1 | 4 | -0.950000 | -10.942492343 | 4.455490996 | -8.319917115  | 1 | 0 | 1 | # | oh |
| 3024 | 1 | 3 | -1.050000 | -13.451368349 | 4.458526970 | -6.271017583  | 1 | 0 | 1 | # | ob |
| 3025 | 1 | 4 | -0.950000 | -12.352657657 | 8.908159004 | -10.345082885 | 1 | 0 | 1 | # | oh |
| 3026 | 1 | 3 | -1.050000 | -15.020481651 | 8.905123030 | -12.393982417 | 1 | 0 | 1 | # | ob |
| 3027 | 1 | 4 | -0.950000 | -14.941007657 | 4.453609004 | -10.345082885 | 1 | 0 | 1 | # | oh |
| 3028 | 1 | 3 | -1.050000 | -12.432131651 | 4.450573030 | -12.393982417 | 1 | 0 | 1 | # | ob |
| 3029 | 1 | 3 | -1.050000 | -11.335294487 | 1.680900680 | -8.298868622  | 1 | 0 | 1 | # | ob |
| 3030 | 1 | 3 | -1.050000 | -15.376589092 | 6.314939700 | -6.099420289  | 1 | 0 | 1 | # | ob |
| 3031 | 1 | 3 | -1.050000 | -11.960435345 | 6.132051481 | -10.365922068 | 1 | 0 | 1 | # | ob |
| 3032 | 1 | 3 | -1.050000 | -13.094932736 | 1.850546126 | -12.564346262 | 1 | 0 | 1 | # | ob |
| 3033 | 1 | 5 | 2.100000  | -11.307102986 | 1.527119204 | -6.669722830  | 1 | 0 | 1 | # | st |
| 3034 | 1 | 5 | 2.100000  | -11.988072226 | 5.973370782 | -11.994298097 | 1 | 0 | 1 | # | st |
| 3035 | 1 | 5 | 2.100000  | -14.576397014 | 7.381980796 | -11.995277170 | 1 | 0 | 1 | # | st |
| 3036 | 1 | 5 | 2.100000  | -11.988047014 | 2.927430796 | -11.995277170 | 1 | 0 | 1 | # | st |
| 3037 | 1 | 5 | 2.100000  | -11.307077774 | 7.390279218 | -6.670701903  | 1 | 0 | 1 | # | st |
| 3038 | 1 | 5 | 2.100000  | -13.895427774 | 2.935729218 | -6.670701903  | 1 | 0 | 1 | # | st |
| 3039 | 1 | 5 | 2.100000  | -13.895452986 | 5.981669204 | -6.669722830  | 1 | 0 | 1 | # | st |
| 3040 | 1 | 5 | 2.100000  | -14.576422226 | 1.518820782 | -11.994298097 | 1 | 0 | 1 | # | st |
| 3041 | 1 | 1 | 1.575000  | -7.764844971  | 1.474661568 | -9.332229368  | 1 | 0 | 1 | # | ao |
| 3042 | 1 | 1 | 1.575000  | -10.353194971 | 5.929211568 | -9.332229368  | 1 | 0 | 1 | # | ao |
| 3043 | 1 | 1 | 1.575000  | -7.765255029  | 7.434438432 | -9.332770632  | 1 | 0 | 1 | # | ao |
| 3044 | 1 | 1 | 1.575000  | -5.176905029  | 2.979888432 | -9.332770632  | 1 | 0 | 1 | # | ao |
| 3045 | 1 | 2 | 0.425000  | -6.618749128  | 4.457267322 | -7.846384937  | 1 | 0 | 1 | # | ho |
| 3046 | 1 | 2 | 0.425000  | -9.207099128  | 0.002717322 | -7.846384937  | 1 | 0 | 1 | # | ho |
| 3047 | 1 | 2 | 0.425000  | -8.911350872  | 4.451832678 | -10.818615063 | 1 | 0 | 1 | # | ho |
| 3048 | 1 | 2 | 0.425000  | -6.323000872  | 8.906382678 | -10.818615063 | 1 | 0 | 1 | # | ho |
| 3049 | 1 | 3 | -1.050000 | -9.372085345  | 1.677501481 | -10.365922068 | 1 | 0 | 1 | # | ob |
| 3050 | 1 | 3 | -1.050000 | -5.329882736  | 6.305096126 | -12.564346262 | 1 | 0 | 1 | # | ob |
| 3051 | 1 | 3 | -1.050000 | -6.783155513  | 2.773649320 | -10.366131378 | 1 | 0 | 1 | # | ob |
| 3052 | 1 | 3 | -1.050000 | -7.918560908  | 7.048710300 | -12.565579711 | 1 | 0 | 1 | # | ob |
| 3053 | 1 | 3 | -1.050000 | -9.371505513  | 7.228199320 | -10.366131378 | 1 | 0 | 1 | # | ob |
| 3054 | 1 | 3 | -1.050000 | -8.746944487  | 6.135450680 | -8.298868622  | 1 | 0 | 1 | # | ob |
| 3055 | 1 | 3 | -1.050000 | -5.330210908  | 2.594160300 | -12.565579711 | 1 | 0 | 1 | # | ob |
| 3056 | 1 | 3 | -1.050000 | -8.746364655  | 2.777048519 | -8.299077932  | 1 | 0 | 1 | # | ob |
| 3057 | 1 | 3 | -1.050000 | -7.611867264  | 7.058553874 | -6.100653738  | 1 | 0 | 1 | # | ob |
| 3058 | 1 | 3 | -1.050000 | -6.158014655  | 7.231598519 | -8.299077932  | 1 | 0 | 1 | # | ob |
| 3059 | 1 | 3 | -1.050000 | -10.200217264 | 2.604003874 | -6.100653738  | 1 | 0 | 1 | # | ob |
| 3060 | 1 | 3 | -1.050000 | -7.611539092  | 1.860389700 | -6.099420289  | 1 | 0 | 1 | # | ob |
| 3061 | 1 | 4 | -0.950000 | -8.354142343  | 0.000940996 | -8.319917115  | 1 | 0 | 1 | # | oh |
| 3062 | 1 | 3 | -1.050000 | -5.686318349  | 0.003976970 | -6.271017583  | 1 | 0 | 1 | # | ob |
| 3063 | 1 | 4 | -0.950000 | -5.765792343  | 4.455490996 | -8.319917115  | 1 | 0 | 1 | # | oh |
| 3064 | 1 | 3 | -1.050000 | -8.274668349  | 4.458526970 | -6.271017583  | 1 | 0 | 1 | # | ob |
| 3065 | 1 | 4 | -0.950000 | -7.175957657  | 8.908159004 | -10.345082885 | 1 | 0 | 1 | # | oh |
| 3066 | 1 | 3 | -1.050000 | -9.843781651  | 8.905123030 | -12.393982417 | 1 | 0 | 1 | # | ob |
| 3067 | 1 | 4 | -0.950000 | -9.764307657  | 4.453609004 | -10.345082885 | 1 | 0 | 1 | # | oh |
| 3068 | 1 | 3 | -1.050000 | -7.255431651  | 4.450573030 | -12.393982417 | 1 | 0 | 1 | # | ob |
| 3069 | 1 | 3 | -1.050000 | -6.158594487  | 1.680900680 | -8.298868622  | 1 | 0 | 1 | # | ob |
| 3070 | 1 | 3 | -1.050000 | -10.199889092 | 6.314939700 | -6.099420289  | 1 | 0 | 1 | # | ob |
| 3071 | 1 | 3 | -1.050000 | -6.783735345  | 6.132051481 | -10.365922068 | 1 | 0 | 1 | # | ob |
| 3072 | 1 | 3 | -1.050000 | -7.918232736  | 1.850546126 | -12.564346262 | 1 | 0 | 1 | # | ob |
| 3073 | 1 | 5 | 2.100000  | -6.130402986  | 1.527119204 | -6.669722830  | 1 | 0 | 1 | # | st |
| 3074 | 1 | 5 | 2.100000  | -6.811372226  | 5.973370782 | -11.994298097 | 1 | 0 | 1 | # | st |
| 3075 | 1 | 5 | 2.100000  | -9.399697014  | 7.381980796 | -11.995277170 | 1 | 0 | 1 | # | st |
| 3076 | 1 | 5 | 2.100000  | -6.811347014  | 2.927430796 | -11.995277170 | 1 | 0 | 1 | # | st |
| 3077 | 1 | 5 | 2.100000  | -6.130377774  | 7.390279218 | -6.670701903  | 1 | 0 | 1 | # | st |
| 3078 | 1 | 5 | 2.100000  | -8.718727774  | 2.935729218 | -6.670701903  | 1 | 0 | 1 | # | st |
| 3079 | 1 | 5 | 2.100000  | -8.718752986  | 5.981669204 | -6.669722830  | 1 | 0 | 1 | # | st |
| 3080 | 1 | 5 | 2.100000  | -9.399722226  | 1.518820782 | -11.994298097 | 1 | 0 | 1 | # | st |
| 3081 | 1 | 1 | 1.575000  | -2.588144971  | 1.474661568 | -9.332229368  | 1 | 0 | 1 | # | ao |
| 3082 | 1 | 1 | 1.575000  | -5.176494971  | 5.929211568 | -9.332229368  | 1 | 0 | 1 | # | ao |
| 3083 | 1 | 1 | 1.575000  | -2.588555029  | 7.434438432 | -9.332770632  | 1 | 0 | 1 | # | ao |
| 3084 | 1 | 1 | 1.575000  | -0.000205029  | 2.979888432 | -9.332770632  | 1 | 0 | 1 | # | ao |
| 3085 | 1 | 2 | 0.425000  | -1.442049128  | 4.457267322 | -7.846384937  | 1 | 0 | 1 | # | ho |
| 3086 | 1 | 2 | 0.425000  | -4.030399128  | 0.002717322 | -7.846384937  | 1 | 0 | 1 | # | ho |
| 3087 | 1 | 2 | 0.425000  | -3.734650872  | 4.451832678 | -10.818615063 | 1 | 0 | 1 | # | ho |
| 3088 | 1 | 2 | 0.425000  | -1.146300872  | 8.906382678 | -10.818615063 | 1 | 0 | 1 | # | ho |
| 3089 | 1 | 3 | -1.050000 | -4.195385345  | 1.677501481 | -10.365922068 | 1 | 0 | 1 | # | ob |
| 3090 | 1 | 3 | -1.050000 | -0.153182736  | 6.305096126 | -12.564346262 | 1 | 0 | 1 | # | ob |
| 3091 | 1 | 3 | -1.050000 | -1.606455513  | 2.773649320 | -10.366131378 | 1 | 0 | 1 | # | ob |
| 3092 | 1 | 3 | -1.050000 | -2.741860908  | 7.048710300 | -12.565579711 | 1 | 0 | 1 | # | ob |
| 3093 | 1 | 3 | -1.050000 | -4.194805513  | 7.228199320 | -10.366131378 | 1 | 0 | 1 | # | ob |
| 3094 | 1 | 3 | -1.050000 | -3.570244487  | 6.135450680 | -8.298868622  | 1 | 0 | 1 | # | ob |
| 3095 | 1 | 3 | -1.050000 | -0.153510908  | 2.594160300 | -12.565579711 | 1 | 0 | 1 | # | ob |
| 3096 | 1 | 3 | -1.050000 | -3.569664655  | 2.777048519 | -8.299077932  | 1 | 0 | 1 | # | ob |

|      |   |   |           |              |              |               |   |   |   |   |    |
|------|---|---|-----------|--------------|--------------|---------------|---|---|---|---|----|
| 3097 | 1 | 3 | -1.050000 | -2.435167264 | 7.058553874  | -6.100653738  | 1 | 0 | 1 | # | ob |
| 3098 | 1 | 3 | -1.050000 | -0.981314655 | 7.231598519  | -8.299077932  | 1 | 0 | 1 | # | ob |
| 3099 | 1 | 3 | -1.050000 | -5.023517264 | 2.604003874  | -6.100653738  | 1 | 0 | 1 | # | ob |
| 3100 | 1 | 3 | -1.050000 | -2.434839092 | 1.860389700  | -6.099420289  | 1 | 0 | 1 | # | ob |
| 3101 | 1 | 4 | -0.950000 | -3.177442343 | 0.000940996  | -8.319917115  | 1 | 0 | 1 | # | oh |
| 3102 | 1 | 3 | -1.050000 | -0.509618349 | 0.003976970  | -6.271017583  | 1 | 0 | 1 | # | ob |
| 3103 | 1 | 4 | -0.950000 | -0.589092343 | 4.455490996  | -8.319917115  | 1 | 0 | 1 | # | oh |
| 3104 | 1 | 3 | -1.050000 | -3.097968349 | 4.458526970  | -6.271017583  | 1 | 0 | 1 | # | ob |
| 3105 | 1 | 4 | -0.950000 | -1.999257657 | 8.908159004  | -10.345082885 | 1 | 0 | 1 | # | oh |
| 3106 | 1 | 3 | -1.050000 | -4.667081651 | 8.905123030  | -12.393982417 | 1 | 0 | 1 | # | ob |
| 3107 | 1 | 4 | -0.950000 | -4.587607657 | 4.453609004  | -10.345082885 | 1 | 0 | 1 | # | oh |
| 3108 | 1 | 3 | -1.050000 | -2.078731651 | 4.450573030  | -12.393982417 | 1 | 0 | 1 | # | ob |
| 3109 | 1 | 3 | -1.050000 | -0.981894487 | 1.680900680  | -8.298868622  | 1 | 0 | 1 | # | ob |
| 3110 | 1 | 3 | -1.050000 | -5.023189092 | 6.314939700  | -6.099420289  | 1 | 0 | 1 | # | ob |
| 3111 | 1 | 3 | -1.050000 | -1.607035345 | 6.132051481  | -10.365922068 | 1 | 0 | 1 | # | ob |
| 3112 | 1 | 3 | -1.050000 | -2.741532736 | 1.850546126  | -12.564346262 | 1 | 0 | 1 | # | ob |
| 3113 | 1 | 5 | 2.100000  | -0.953702986 | 1.527119204  | -6.669722830  | 1 | 0 | 1 | # | st |
| 3114 | 1 | 5 | 2.100000  | -1.634672226 | 5.973370782  | -11.994298097 | 1 | 0 | 1 | # | st |
| 3115 | 1 | 5 | 2.100000  | -4.222997014 | 7.381980796  | -11.995277170 | 1 | 0 | 1 | # | st |
| 3116 | 1 | 5 | 2.100000  | -1.634647014 | 2.927430796  | -11.995277170 | 1 | 0 | 1 | # | st |
| 3117 | 1 | 5 | 2.100000  | -0.953677774 | 7.390279218  | -6.670701903  | 1 | 0 | 1 | # | st |
| 3118 | 1 | 5 | 2.100000  | -3.542027774 | 2.935729218  | -6.670701903  | 1 | 0 | 1 | # | st |
| 3119 | 1 | 5 | 2.100000  | -3.542052986 | 5.981669204  | -6.669722830  | 1 | 0 | 1 | # | st |
| 3120 | 1 | 5 | 2.100000  | -4.223022226 | 1.518820782  | -11.994298097 | 1 | 0 | 1 | # | st |
| 3121 | 1 | 1 | 1.575000  | 2.588555029  | 10.383761568 | -9.332229368  | 0 | 0 | 1 | # | ao |
| 3122 | 1 | 1 | 1.575000  | 0.000205029  | 14.838311568 | -9.332229368  | 0 | 0 | 1 | # | ao |
| 3123 | 1 | 1 | 1.575000  | 2.588144971  | 16.343538432 | -9.332770632  | 0 | 0 | 1 | # | ao |
| 3124 | 1 | 1 | 1.575000  | 5.176494971  | 11.888988432 | -9.332770632  | 0 | 0 | 1 | # | ao |
| 3125 | 1 | 2 | 0.425000  | 3.734650872  | 13.366367322 | -7.846384937  | 0 | 0 | 1 | # | ho |
| 3126 | 1 | 2 | 0.425000  | 1.146300872  | 8.911817322  | -7.846384937  | 0 | 0 | 1 | # | ho |
| 3127 | 1 | 2 | 0.425000  | 1.442049128  | 13.360932678 | -10.818615063 | 0 | 0 | 1 | # | ho |
| 3128 | 1 | 2 | 0.425000  | 4.030399128  | 17.815482678 | -10.818615063 | 0 | 0 | 1 | # | ho |
| 3129 | 1 | 3 | -1.050000 | 0.981314655  | 10.586601481 | -10.365922068 | 0 | 0 | 1 | # | ob |
| 3130 | 1 | 3 | -1.050000 | 5.023517264  | 15.214196126 | -12.564346262 | 0 | 0 | 1 | # | ob |
| 3131 | 1 | 3 | -1.050000 | 3.570244487  | 11.682749320 | -10.366131378 | 0 | 0 | 1 | # | ob |
| 3132 | 1 | 3 | -1.050000 | 2.434839092  | 15.957810300 | -12.565579711 | 0 | 0 | 1 | # | ob |
| 3133 | 1 | 3 | -1.050000 | 0.981894487  | 16.137299320 | -10.366131378 | 0 | 0 | 1 | # | ob |
| 3134 | 1 | 3 | -1.050000 | 1.606455513  | 15.044550680 | -8.298868622  | 0 | 0 | 1 | # | ob |
| 3135 | 1 | 3 | -1.050000 | 5.023189092  | 11.503260300 | -12.565579711 | 0 | 0 | 1 | # | ob |
| 3136 | 1 | 3 | -1.050000 | 1.607035345  | 11.686148519 | -8.299077932  | 0 | 0 | 1 | # | ob |
| 3137 | 1 | 3 | -1.050000 | 2.741532736  | 15.967653874 | -6.100653738  | 0 | 0 | 1 | # | ob |
| 3138 | 1 | 3 | -1.050000 | 4.195385345  | 16.140698519 | -8.299077932  | 0 | 0 | 1 | # | ob |
| 3139 | 1 | 3 | -1.050000 | 0.153182736  | 11.513103874 | -6.100653738  | 0 | 0 | 1 | # | ob |
| 3140 | 1 | 3 | -1.050000 | 2.741860908  | 10.769489700 | -6.099420289  | 0 | 0 | 1 | # | ob |
| 3141 | 1 | 4 | -0.950000 | 1.999257657  | 8.910040996  | -8.319917115  | 0 | 0 | 1 | # | oh |
| 3142 | 1 | 3 | -1.050000 | 4.667081651  | 8.913076970  | -6.271017583  | 0 | 0 | 1 | # | ob |
| 3143 | 1 | 4 | -0.950000 | 4.587607657  | 13.364590996 | -8.319917115  | 0 | 0 | 1 | # | oh |
| 3144 | 1 | 3 | -1.050000 | 2.078731651  | 13.367626970 | -6.271017583  | 0 | 0 | 1 | # | ob |
| 3145 | 1 | 4 | -0.950000 | 3.177442343  | 17.817259004 | -10.345082885 | 0 | 0 | 1 | # | oh |
| 3146 | 1 | 3 | -1.050000 | 0.509618349  | 17.814223030 | -12.393982417 | 0 | 0 | 1 | # | ob |
| 3147 | 1 | 4 | -0.950000 | 0.589092343  | 13.362709004 | -10.345082885 | 0 | 0 | 1 | # | oh |
| 3148 | 1 | 3 | -1.050000 | 3.097968349  | 13.359673030 | -12.393982417 | 0 | 0 | 1 | # | ob |
| 3149 | 1 | 3 | -1.050000 | 4.194805513  | 10.590000680 | -8.298868622  | 0 | 0 | 1 | # | ob |
| 3150 | 1 | 3 | -1.050000 | 0.153510908  | 15.224039700 | -6.099420289  | 0 | 0 | 1 | # | ob |
| 3151 | 1 | 3 | -1.050000 | 3.569664655  | 15.041151481 | -10.365922068 | 0 | 0 | 1 | # | ob |
| 3152 | 1 | 3 | -1.050000 | 2.435167264  | 10.759646126 | -12.564346262 | 0 | 0 | 1 | # | ob |
| 3153 | 1 | 5 | 2.100000  | 4.222997014  | 10.436219204 | -6.669722830  | 0 | 0 | 1 | # | st |
| 3154 | 1 | 5 | 2.100000  | 3.542027774  | 14.882470782 | -11.994298097 | 0 | 0 | 1 | # | st |
| 3155 | 1 | 5 | 2.100000  | 0.953702986  | 16.291080796 | -11.995277170 | 0 | 0 | 1 | # | st |
| 3156 | 1 | 5 | 2.100000  | 3.542052986  | 11.836530796 | -11.995277170 | 0 | 0 | 1 | # | st |
| 3157 | 1 | 5 | 2.100000  | 4.223022226  | 16.299379218 | -6.670701903  | 0 | 0 | 1 | # | st |
| 3158 | 1 | 5 | 2.100000  | 1.634672226  | 11.844829218 | -6.670701903  | 0 | 0 | 1 | # | st |
| 3159 | 1 | 5 | 2.100000  | 1.634647014  | 14.890769204 | -6.669722830  | 0 | 0 | 1 | # | st |
| 3160 | 1 | 5 | 2.100000  | 0.953677774  | 10.427920782 | -11.994298097 | 0 | 0 | 1 | # | st |
| 3161 | 1 | 1 | 1.575000  | 7.765255029  | 10.383761568 | -9.332229368  | 0 | 0 | 1 | # | ao |
| 3162 | 1 | 1 | 1.575000  | 5.176905029  | 14.838311568 | -9.332229368  | 0 | 0 | 1 | # | ao |
| 3163 | 1 | 1 | 1.575000  | 7.764844971  | 16.343538432 | -9.332770632  | 0 | 0 | 1 | # | ao |
| 3164 | 1 | 1 | 1.575000  | 10.353194971 | 11.888988432 | -9.332770632  | 0 | 0 | 1 | # | ao |
| 3165 | 1 | 2 | 0.425000  | 8.911350872  | 13.366367322 | -7.846384937  | 0 | 0 | 1 | # | ho |
| 3166 | 1 | 2 | 0.425000  | 6.323000872  | 8.911817322  | -7.846384937  | 0 | 0 | 1 | # | ho |
| 3167 | 1 | 2 | 0.425000  | 6.618749128  | 13.360932678 | -10.818615063 | 0 | 0 | 1 | # | ho |
| 3168 | 1 | 2 | 0.425000  | 9.207099128  | 17.815482678 | -10.818615063 | 0 | 0 | 1 | # | ho |
| 3169 | 1 | 3 | -1.050000 | 6.158014655  | 10.586601481 | -10.365922068 | 0 | 0 | 1 | # | ob |
| 3170 | 1 | 3 | -1.050000 | 10.200217264 | 15.214196126 | -12.564346262 | 0 | 0 | 1 | # | ob |
| 3171 | 1 | 3 | -1.050000 | 8.746944487  | 11.682749320 | -10.366131378 | 0 | 0 | 1 | # | ob |
| 3172 | 1 | 3 | -1.050000 | 7.611539092  | 15.957810300 | -12.565579711 | 0 | 0 | 1 | # | ob |
| 3173 | 1 | 3 | -1.050000 | 6.158594487  | 16.137299320 | -10.366131378 | 0 | 0 | 1 | # | ob |
| 3174 | 1 | 3 | -1.050000 | 6.783155513  | 15.044550680 | -8.298868622  | 0 | 0 | 1 | # | ob |
| 3175 | 1 | 3 | -1.050000 | 10.199889092 | 11.503260300 | -12.565579711 | 0 | 0 | 1 | # | ob |
| 3176 | 1 | 3 | -1.050000 | 6.783735345  | 11.686148519 | -8.299077932  | 0 | 0 | 1 | # | ob |
| 3177 | 1 | 3 | -1.050000 | 7.918232736  | 15.967653874 | -6.100653738  | 0 | 0 | 1 | # | ob |
| 3178 | 1 | 3 | -1.050000 | 9.372085345  | 16.140698519 | -8.299077932  | 0 | 0 | 1 | # | ob |
| 3179 | 1 | 3 | -1.050000 | 5.329882736  | 11.513103874 | -6.100653738  | 0 | 0 | 1 | # | ob |
| 3180 | 1 | 3 | -1.050000 | 7.918560908  | 10.769489700 | -6.099420289  | 0 | 0 | 1 | # | ob |
| 3181 | 1 | 4 | -0.950000 | 7.175957657  | 8.910040996  | -8.319917115  | 0 | 0 | 1 | # | oh |
| 3182 | 1 | 3 | -1.050000 | 9.843781651  | 8.913076970  | -6.271017583  | 0 | 0 | 1 | # | ob |
| 3183 | 1 | 4 | -0.950000 | 9.764307657  | 13.364590996 | -8.319917115  | 0 | 0 | 1 | # | oh |
| 3184 | 1 | 3 | -1.050000 | 7.255431651  | 13.367626970 | -6.271017583  | 0 | 0 | 1 | # | ob |
| 3185 | 1 | 4 | -0.950000 | 8.354142343  | 17.817259004 | -10.345082885 | 0 | 0 | 1 | # | oh |
| 3186 | 1 | 3 | -1.050000 | 5.686318349  | 17.814223030 | -12.393982417 | 0 | 0 | 1 | # | ob |
| 3187 | 1 | 4 | -0.950000 | 5.765792343  | 13.362709004 | -10.345082885 | 0 | 0 | 1 | # | oh |
| 3188 | 1 | 3 | -1.050000 | 8.274668349  | 13.359673030 | -12.393982417 | 0 | 0 | 1 | # | ob |
| 3189 | 1 | 3 | -1.050000 | 9.371505513  | 10.590000680 | -8.298868622  | 0 | 0 | 1 | # | ob |

|      |   |   |           |               |              |               |   |   |   |   |    |
|------|---|---|-----------|---------------|--------------|---------------|---|---|---|---|----|
| 3190 | 1 | 3 | -1.050000 | 5.330210908   | 15.224039700 | -6.099420289  | 0 | 0 | 1 | # | ob |
| 3191 | 1 | 3 | -1.050000 | 8.746364655   | 15.041151481 | -10.365922068 | 0 | 0 | 1 | # | ob |
| 3192 | 1 | 3 | -1.050000 | 7.611867264   | 10.759646126 | -12.564346262 | 0 | 0 | 1 | # | ob |
| 3193 | 1 | 5 | 2.100000  | 9.399697014   | 10.436219204 | -6.669722830  | 0 | 0 | 1 | # | st |
| 3194 | 1 | 5 | 2.100000  | 8.718727774   | 14.882470782 | -11.994298097 | 0 | 0 | 1 | # | st |
| 3195 | 1 | 5 | 2.100000  | 6.130402986   | 16.291080796 | -11.995277170 | 0 | 0 | 1 | # | st |
| 3196 | 1 | 5 | 2.100000  | 8.718752986   | 11.836530796 | -11.995277170 | 0 | 0 | 1 | # | st |
| 3197 | 1 | 5 | 2.100000  | 9.399722226   | 16.299379218 | -6.670701903  | 0 | 0 | 1 | # | st |
| 3198 | 1 | 5 | 2.100000  | 6.811372226   | 11.844829218 | -6.670701903  | 0 | 0 | 1 | # | st |
| 3199 | 1 | 5 | 2.100000  | 6.811347014   | 14.890769204 | -6.669722830  | 0 | 0 | 1 | # | st |
| 3200 | 1 | 5 | 2.100000  | 6.130377774   | 10.427920782 | -11.994298097 | 0 | 0 | 1 | # | st |
| 3201 | 1 | 1 | 1.575000  | 12.941955029  | 10.383761568 | -9.332229368  | 0 | 0 | 1 | # | ao |
| 3202 | 1 | 1 | 1.575000  | 10.353605029  | 14.838311568 | -9.332229368  | 0 | 0 | 1 | # | ao |
| 3203 | 1 | 1 | 1.575000  | 12.941544971  | 16.343538432 | -9.332770632  | 0 | 0 | 1 | # | ao |
| 3204 | 1 | 1 | 1.575000  | 15.529894971  | 11.888988432 | -9.332770632  | 0 | 0 | 1 | # | ao |
| 3205 | 1 | 2 | 0.425000  | 14.088050872  | 13.366367322 | -7.846384937  | 0 | 0 | 1 | # | ho |
| 3206 | 1 | 2 | 0.425000  | 11.499700872  | 8.911817322  | -7.846384937  | 0 | 0 | 1 | # | ho |
| 3207 | 1 | 2 | 0.425000  | 11.795449128  | 13.360932678 | -10.818615063 | 0 | 0 | 1 | # | ho |
| 3208 | 1 | 2 | 0.425000  | 14.383799128  | 17.815482678 | -10.818615063 | 0 | 0 | 1 | # | ho |
| 3209 | 1 | 3 | -1.050000 | 11.334714655  | 10.586601481 | -10.365922068 | 0 | 0 | 1 | # | ob |
| 3210 | 1 | 3 | -1.050000 | 15.376917264  | 15.214196126 | -12.564346262 | 0 | 0 | 1 | # | ob |
| 3211 | 1 | 3 | -1.050000 | 13.923644487  | 11.682749320 | -10.366131378 | 0 | 0 | 1 | # | ob |
| 3212 | 1 | 3 | -1.050000 | 12.788239092  | 15.957810300 | -12.565579711 | 0 | 0 | 1 | # | ob |
| 3213 | 1 | 3 | -1.050000 | 11.335294487  | 16.137299320 | -10.366131378 | 0 | 0 | 1 | # | ob |
| 3214 | 1 | 3 | -1.050000 | 11.959855513  | 15.044550680 | -8.298868622  | 0 | 0 | 1 | # | ob |
| 3215 | 1 | 3 | -1.050000 | 15.376589092  | 11.503260300 | -12.565579711 | 0 | 0 | 1 | # | ob |
| 3216 | 1 | 3 | -1.050000 | 11.960435345  | 11.686148519 | -8.299077932  | 0 | 0 | 1 | # | ob |
| 3217 | 1 | 3 | -1.050000 | 13.094932736  | 15.967653874 | -6.100653738  | 0 | 0 | 1 | # | ob |
| 3218 | 1 | 3 | -1.050000 | 14.548785345  | 16.140698519 | -8.299077932  | 0 | 0 | 1 | # | ob |
| 3219 | 1 | 3 | -1.050000 | 10.506582736  | 11.513103874 | -6.100653738  | 0 | 0 | 1 | # | ob |
| 3220 | 1 | 3 | -1.050000 | 13.095260908  | 10.769489700 | -6.099420289  | 0 | 0 | 1 | # | ob |
| 3221 | 1 | 4 | -0.950000 | 12.352657657  | 8.910040996  | -8.319917115  | 0 | 0 | 1 | # | oh |
| 3222 | 1 | 3 | -1.050000 | 15.020481651  | 8.913076970  | -6.271017583  | 0 | 0 | 1 | # | ob |
| 3223 | 1 | 4 | -0.950000 | 14.941007657  | 13.364590996 | -8.319917115  | 0 | 0 | 1 | # | oh |
| 3224 | 1 | 3 | -1.050000 | 12.432131651  | 13.367626970 | -6.271017583  | 0 | 0 | 1 | # | ob |
| 3225 | 1 | 4 | -0.950000 | 13.530842343  | 17.817259004 | -10.345082885 | 0 | 0 | 1 | # | oh |
| 3226 | 1 | 3 | -1.050000 | 10.863018349  | 17.814223030 | -12.393982417 | 0 | 0 | 1 | # | ob |
| 3227 | 1 | 4 | -0.950000 | 10.942492343  | 13.362709004 | -10.345082885 | 0 | 0 | 1 | # | oh |
| 3228 | 1 | 3 | -1.050000 | 13.451368349  | 13.359673030 | -12.393982417 | 0 | 0 | 1 | # | ob |
| 3229 | 1 | 3 | -1.050000 | 14.548205513  | 10.590000680 | -8.298868622  | 0 | 0 | 1 | # | ob |
| 3230 | 1 | 3 | -1.050000 | 10.506910908  | 15.224039700 | -6.099420289  | 0 | 0 | 1 | # | ob |
| 3231 | 1 | 3 | -1.050000 | 13.923064655  | 15.041151481 | -10.365922068 | 0 | 0 | 1 | # | ob |
| 3232 | 1 | 3 | -1.050000 | 12.788567264  | 10.759646126 | -12.564346262 | 0 | 0 | 1 | # | ob |
| 3233 | 1 | 5 | 2.100000  | 14.576397014  | 10.436219204 | -6.669722830  | 0 | 0 | 1 | # | st |
| 3234 | 1 | 5 | 2.100000  | 13.895427774  | 14.882470782 | -11.994298097 | 0 | 0 | 1 | # | st |
| 3235 | 1 | 5 | 2.100000  | 11.307102986  | 16.291080796 | -11.995277170 | 0 | 0 | 1 | # | st |
| 3236 | 1 | 5 | 2.100000  | 13.895452986  | 11.836530796 | -11.995277170 | 0 | 0 | 1 | # | st |
| 3237 | 1 | 5 | 2.100000  | 14.576422226  | 16.299379218 | -6.670701903  | 0 | 0 | 1 | # | st |
| 3238 | 1 | 5 | 2.100000  | 11.988072226  | 11.844829218 | -6.670701903  | 0 | 0 | 1 | # | st |
| 3239 | 1 | 5 | 2.100000  | 11.988047014  | 14.890769204 | -6.669722830  | 0 | 0 | 1 | # | st |
| 3240 | 1 | 5 | 2.100000  | 11.307077774  | 10.427920782 | -11.994298097 | 0 | 0 | 1 | # | st |
| 3241 | 1 | 1 | 1.575000  | -12.941544971 | 10.383761568 | -9.332229368  | 1 | 0 | 1 | # | ao |
| 3242 | 1 | 1 | 1.575000  | -15.529894971 | 14.838311568 | -9.332229368  | 1 | 0 | 1 | # | ao |
| 3243 | 1 | 1 | 1.575000  | -12.941955029 | 16.343538432 | -9.332770632  | 1 | 0 | 1 | # | ao |
| 3244 | 1 | 1 | 1.575000  | -10.353605029 | 11.888988432 | -9.332770632  | 1 | 0 | 1 | # | ao |
| 3245 | 1 | 2 | 0.425000  | -11.795449128 | 13.366367322 | -7.846384937  | 1 | 0 | 1 | # | ho |
| 3246 | 1 | 2 | 0.425000  | -14.383799128 | 8.911817322  | -7.846384937  | 1 | 0 | 1 | # | ho |
| 3247 | 1 | 2 | 0.425000  | -14.088050872 | 13.360932678 | -10.818615063 | 1 | 0 | 1 | # | ho |
| 3248 | 1 | 2 | 0.425000  | -11.499700872 | 17.815482678 | -10.818615063 | 1 | 0 | 1 | # | ho |
| 3249 | 1 | 3 | -1.050000 | -14.548785345 | 10.586601481 | -10.365922068 | 1 | 0 | 1 | # | ob |
| 3250 | 1 | 3 | -1.050000 | -10.506582736 | 15.214196126 | -12.564346262 | 1 | 0 | 1 | # | ob |
| 3251 | 1 | 3 | -1.050000 | -11.959855513 | 11.682749320 | -10.366131378 | 1 | 0 | 1 | # | ob |
| 3252 | 1 | 3 | -1.050000 | -13.095260908 | 15.957810300 | -12.565579711 | 1 | 0 | 1 | # | ob |
| 3253 | 1 | 3 | -1.050000 | -14.548205513 | 16.137299320 | -10.366131378 | 1 | 0 | 1 | # | ob |
| 3254 | 1 | 3 | -1.050000 | -13.923644487 | 15.044550680 | -8.298868622  | 1 | 0 | 1 | # | ob |
| 3255 | 1 | 3 | -1.050000 | -10.506910908 | 11.503260300 | -12.565579711 | 1 | 0 | 1 | # | ob |
| 3256 | 1 | 3 | -1.050000 | -13.923064655 | 11.686148519 | -8.299077932  | 1 | 0 | 1 | # | ob |
| 3257 | 1 | 3 | -1.050000 | -12.788567264 | 15.967653874 | -6.100653738  | 1 | 0 | 1 | # | ob |
| 3258 | 1 | 3 | -1.050000 | -11.334714655 | 16.140698519 | -8.299077932  | 1 | 0 | 1 | # | ob |
| 3259 | 1 | 3 | -1.050000 | -15.376917264 | 11.513103874 | -6.100653738  | 1 | 0 | 1 | # | ob |
| 3260 | 1 | 3 | -1.050000 | -12.788239092 | 10.769489700 | -6.099420289  | 1 | 0 | 1 | # | ob |
| 3261 | 1 | 4 | -0.950000 | -13.530842343 | 8.910040996  | -8.319917115  | 1 | 0 | 1 | # | oh |
| 3262 | 1 | 3 | -1.050000 | -10.863018349 | 8.913076970  | -6.271017583  | 1 | 0 | 1 | # | ob |
| 3263 | 1 | 4 | -0.950000 | -10.942492343 | 13.364590996 | -8.319917115  | 1 | 0 | 1 | # | oh |
| 3264 | 1 | 3 | -1.050000 | -13.451368349 | 13.367626970 | -6.271017583  | 1 | 0 | 1 | # | ob |
| 3265 | 1 | 4 | -0.950000 | -12.352657657 | 17.817259004 | -10.345082885 | 1 | 0 | 1 | # | oh |
| 3266 | 1 | 3 | -1.050000 | -15.020481651 | 17.814223030 | -12.393982417 | 1 | 0 | 1 | # | ob |
| 3267 | 1 | 4 | -0.950000 | -14.941007657 | 13.362709004 | -10.345082885 | 1 | 0 | 1 | # | oh |
| 3268 | 1 | 3 | -1.050000 | -12.432131651 | 13.359673030 | -12.393982417 | 1 | 0 | 1 | # | ob |
| 3269 | 1 | 3 | -1.050000 | -11.335294487 | 10.590000680 | -8.298868622  | 1 | 0 | 1 | # | ob |
| 3270 | 1 | 3 | -1.050000 | -15.376589092 | 15.224039700 | -6.099420289  | 1 | 0 | 1 | # | ob |
| 3271 | 1 | 3 | -1.050000 | -11.960435345 | 15.041151481 | -10.365922068 | 1 | 0 | 1 | # | ob |
| 3272 | 1 | 3 | -1.050000 | -13.094932736 | 10.759646126 | -12.564346262 | 1 | 0 | 1 | # | ob |
| 3273 | 1 | 5 | 2.100000  | -11.307102986 | 10.436219204 | -6.669722830  | 1 | 0 | 1 | # | st |
| 3274 | 1 | 5 | 2.100000  | -11.988072226 | 14.882470782 | -11.994298097 | 1 | 0 | 1 | # | st |
| 3275 | 1 | 5 | 2.100000  | -14.576397014 | 16.291080796 | -11.995277170 | 1 | 0 | 1 | # | st |
| 3276 | 1 | 5 | 2.100000  | -11.988047014 | 11.836530796 | -11.995277170 | 1 | 0 | 1 | # | st |
| 3277 | 1 | 5 | 2.100000  | -11.307077774 | 16.299379218 | -6.670701903  | 1 | 0 | 1 | # | st |
| 3278 | 1 | 5 | 2.100000  | -13.895427774 | 11.844829218 | -6.670701903  | 1 | 0 | 1 | # | st |
| 3279 | 1 | 5 | 2.100000  | -13.895452986 | 14.890769204 | -6.669722830  | 1 | 0 | 1 | # | st |
| 3280 | 1 | 5 | 2.100000  | -14.576422226 | 10.427920782 | -11.994298097 | 1 | 0 | 1 | # | st |
| 3281 | 1 | 1 | 1.575000  | -7.764844971  | 10.383761568 | -9.332229368  | 1 | 0 | 1 | # | ao |
| 3282 | 1 | 1 | 1.575000  | -10.353194971 | 14.838311568 | -9.332229368  | 1 | 0 | 1 | # | ao |

|      |   |   |           |               |               |               |   |   |   |   |    |
|------|---|---|-----------|---------------|---------------|---------------|---|---|---|---|----|
| 3283 | 1 | 1 | 1.575000  | -7.765255029  | 16.343538432  | -9.332770632  | 1 | 0 | 1 | # | ao |
| 3284 | 1 | 1 | 1.575000  | -5.176905029  | 11.888988432  | -9.332770632  | 1 | 0 | 1 | # | ao |
| 3285 | 1 | 2 | 0.425000  | -6.618749128  | 13.366367322  | -7.846384937  | 1 | 0 | 1 | # | ho |
| 3286 | 1 | 2 | 0.425000  | -9.207099128  | 8.911817322   | -7.846384937  | 1 | 0 | 1 | # | ho |
| 3287 | 1 | 2 | 0.425000  | -8.911350872  | 13.360932678  | -10.818615063 | 1 | 0 | 1 | # | ho |
| 3288 | 1 | 2 | 0.425000  | -6.323000872  | 17.815482678  | -10.818615063 | 1 | 0 | 1 | # | ho |
| 3289 | 1 | 3 | -1.050000 | -9.372085345  | 10.586601481  | -10.365922068 | 1 | 0 | 1 | # | ob |
| 3290 | 1 | 3 | -1.050000 | -5.329882736  | 15.214196126  | -12.564346262 | 1 | 0 | 1 | # | ob |
| 3291 | 1 | 3 | -1.050000 | -6.783155513  | 11.682749320  | -10.366131378 | 1 | 0 | 1 | # | ob |
| 3292 | 1 | 3 | -1.050000 | -7.918560908  | 15.957810300  | -12.565579711 | 1 | 0 | 1 | # | ob |
| 3293 | 1 | 3 | -1.050000 | -9.371505513  | 16.137299320  | -10.366131378 | 1 | 0 | 1 | # | ob |
| 3294 | 1 | 3 | -1.050000 | -8.746944487  | 15.044550680  | -8.298868622  | 1 | 0 | 1 | # | ob |
| 3295 | 1 | 3 | -1.050000 | -5.330210908  | 11.503260300  | -12.565579711 | 1 | 0 | 1 | # | ob |
| 3296 | 1 | 3 | -1.050000 | -8.746364655  | 11.686148519  | -8.299077932  | 1 | 0 | 1 | # | ob |
| 3297 | 1 | 3 | -1.050000 | -7.611867264  | 15.967653874  | -6.100653738  | 1 | 0 | 1 | # | ob |
| 3298 | 1 | 3 | -1.050000 | -6.158014655  | 16.140698519  | -8.299077932  | 1 | 0 | 1 | # | ob |
| 3299 | 1 | 3 | -1.050000 | -10.200217264 | 11.513103874  | -6.100653738  | 1 | 0 | 1 | # | ob |
| 3300 | 1 | 3 | -1.050000 | -7.611539092  | 10.769489700  | -6.099420289  | 1 | 0 | 1 | # | ob |
| 3301 | 1 | 4 | -0.950000 | -8.354142343  | 8.910040996   | -8.319917115  | 1 | 0 | 1 | # | oh |
| 3302 | 1 | 3 | -1.050000 | -5.686318349  | 8.913076970   | -6.271017583  | 1 | 0 | 1 | # | ob |
| 3303 | 1 | 4 | -0.950000 | -5.765792343  | 13.364590996  | -8.319917115  | 1 | 0 | 1 | # | oh |
| 3304 | 1 | 3 | -1.050000 | -8.274668349  | 13.367626970  | -6.271017583  | 1 | 0 | 1 | # | ob |
| 3305 | 1 | 4 | -0.950000 | -7.175957657  | 17.817259004  | -10.345082885 | 1 | 0 | 1 | # | oh |
| 3306 | 1 | 3 | -1.050000 | -9.843781651  | 17.814223030  | -12.393982417 | 1 | 0 | 1 | # | ob |
| 3307 | 1 | 4 | -0.950000 | -9.764307657  | 13.362709004  | -10.345082885 | 1 | 0 | 1 | # | oh |
| 3308 | 1 | 3 | -1.050000 | -7.255431651  | 13.359673030  | -12.393982417 | 1 | 0 | 1 | # | ob |
| 3309 | 1 | 3 | -1.050000 | -6.158594487  | 10.590000680  | -8.298868622  | 1 | 0 | 1 | # | ob |
| 3310 | 1 | 3 | -1.050000 | -10.199889092 | 15.224039700  | -6.099420289  | 1 | 0 | 1 | # | ob |
| 3311 | 1 | 3 | -1.050000 | -6.783735345  | 15.041151481  | -10.365922068 | 1 | 0 | 1 | # | ob |
| 3312 | 1 | 3 | -1.050000 | -7.918232736  | 10.759646126  | -12.564346262 | 1 | 0 | 1 | # | ob |
| 3313 | 1 | 5 | 2.100000  | -6.130402986  | 10.436219204  | -6.669722830  | 1 | 0 | 1 | # | st |
| 3314 | 1 | 5 | 2.100000  | -6.811372226  | 14.882470782  | -11.994298097 | 1 | 0 | 1 | # | st |
| 3315 | 1 | 5 | 2.100000  | -9.399697014  | 16.291080796  | -11.995277170 | 1 | 0 | 1 | # | st |
| 3316 | 1 | 5 | 2.100000  | -6.811347014  | 11.836530796  | -11.995277170 | 1 | 0 | 1 | # | st |
| 3317 | 1 | 5 | 2.100000  | -6.130377774  | 16.299379218  | -6.670701903  | 1 | 0 | 1 | # | st |
| 3318 | 1 | 5 | 2.100000  | -8.718727774  | 11.844829218  | -6.670701903  | 1 | 0 | 1 | # | st |
| 3319 | 1 | 5 | 2.100000  | -8.718752986  | 14.890769204  | -6.669722830  | 1 | 0 | 1 | # | st |
| 3320 | 1 | 5 | 2.100000  | -9.399722226  | 10.427920782  | -11.994298097 | 1 | 0 | 1 | # | st |
| 3321 | 1 | 1 | 1.575000  | -2.588144971  | 10.383761568  | -9.332229368  | 1 | 0 | 1 | # | ao |
| 3322 | 1 | 1 | 1.575000  | -5.176494971  | 14.838311568  | -9.332229368  | 1 | 0 | 1 | # | ao |
| 3323 | 1 | 1 | 1.575000  | -2.588555029  | 16.343538432  | -9.332770632  | 1 | 0 | 1 | # | ao |
| 3324 | 1 | 1 | 1.575000  | -0.000205029  | 11.888988432  | -9.332770632  | 1 | 0 | 1 | # | ao |
| 3325 | 1 | 2 | 0.425000  | -1.442049128  | 13.366367322  | -7.846384937  | 1 | 0 | 1 | # | ho |
| 3326 | 1 | 2 | 0.425000  | -4.030399128  | 8.911817322   | -7.846384937  | 1 | 0 | 1 | # | ho |
| 3327 | 1 | 2 | 0.425000  | -3.734650872  | 13.360932678  | -10.818615063 | 1 | 0 | 1 | # | ho |
| 3328 | 1 | 2 | 0.425000  | -1.146300872  | 17.815482678  | -10.818615063 | 1 | 0 | 1 | # | ho |
| 3329 | 1 | 3 | -1.050000 | -4.195385345  | 10.586601481  | -10.365922068 | 1 | 0 | 1 | # | ob |
| 3330 | 1 | 3 | -1.050000 | -0.153182736  | 15.214196126  | -12.564346262 | 1 | 0 | 1 | # | ob |
| 3331 | 1 | 3 | -1.050000 | -1.606455513  | 11.682749320  | -10.366131378 | 1 | 0 | 1 | # | ob |
| 3332 | 1 | 3 | -1.050000 | -2.741860908  | 15.957810300  | -12.565579711 | 1 | 0 | 1 | # | ob |
| 3333 | 1 | 3 | -1.050000 | -4.194805513  | 16.137299320  | -10.366131378 | 1 | 0 | 1 | # | ob |
| 3334 | 1 | 3 | -1.050000 | -3.570244487  | 15.044550680  | -8.298868622  | 1 | 0 | 1 | # | ob |
| 3335 | 1 | 3 | -1.050000 | -0.153510908  | 11.503260300  | -12.565579711 | 1 | 0 | 1 | # | ob |
| 3336 | 1 | 3 | -1.050000 | -3.569664655  | 11.686148519  | -8.299077932  | 1 | 0 | 1 | # | ob |
| 3337 | 1 | 3 | -1.050000 | -2.435167264  | 15.967653874  | -6.100653738  | 1 | 0 | 1 | # | ob |
| 3338 | 1 | 3 | -1.050000 | -0.981314655  | 16.140698519  | -8.299077932  | 1 | 0 | 1 | # | ob |
| 3339 | 1 | 3 | -1.050000 | -5.023517264  | 11.513103874  | -6.100653738  | 1 | 0 | 1 | # | ob |
| 3340 | 1 | 3 | -1.050000 | -2.434839092  | 10.769489700  | -6.099420289  | 1 | 0 | 1 | # | ob |
| 3341 | 1 | 4 | -0.950000 | -3.177442343  | 8.910040996   | -8.319917115  | 1 | 0 | 1 | # | oh |
| 3342 | 1 | 3 | -1.050000 | -0.509618349  | 8.913076970   | -6.271017583  | 1 | 0 | 1 | # | ob |
| 3343 | 1 | 4 | -0.950000 | -0.589092343  | 13.364590996  | -8.319917115  | 1 | 0 | 1 | # | oh |
| 3344 | 1 | 3 | -1.050000 | -3.097968349  | 13.367626970  | -6.271017583  | 1 | 0 | 1 | # | ob |
| 3345 | 1 | 4 | -0.950000 | -1.999257657  | 17.817259004  | -10.345082885 | 1 | 0 | 1 | # | oh |
| 3346 | 1 | 3 | -1.050000 | -4.667081651  | 17.814223030  | -12.393982417 | 1 | 0 | 1 | # | ob |
| 3347 | 1 | 4 | -0.950000 | -4.587607657  | 13.362709004  | -10.345082885 | 1 | 0 | 1 | # | oh |
| 3348 | 1 | 3 | -1.050000 | -2.078731651  | 13.359673030  | -12.393982417 | 1 | 0 | 1 | # | ob |
| 3349 | 1 | 3 | -1.050000 | -0.981894487  | 10.590000680  | -8.298868622  | 1 | 0 | 1 | # | ob |
| 3350 | 1 | 3 | -1.050000 | -5.023189092  | 15.224039700  | -6.099420289  | 1 | 0 | 1 | # | ob |
| 3351 | 1 | 3 | -1.050000 | -1.607035345  | 15.041151481  | -10.365922068 | 1 | 0 | 1 | # | ob |
| 3352 | 1 | 3 | -1.050000 | -2.741532736  | 10.759646126  | -12.564346262 | 1 | 0 | 1 | # | ob |
| 3353 | 1 | 5 | 2.100000  | -0.953702986  | 10.436219204  | -6.669722830  | 1 | 0 | 1 | # | st |
| 3354 | 1 | 5 | 2.100000  | -1.634672226  | 14.882470782  | -11.994298097 | 1 | 0 | 1 | # | st |
| 3355 | 1 | 5 | 2.100000  | -4.222997014  | 16.291080796  | -11.995277170 | 1 | 0 | 1 | # | st |
| 3356 | 1 | 5 | 2.100000  | -1.634647014  | 11.836530796  | -11.995277170 | 1 | 0 | 1 | # | st |
| 3357 | 1 | 5 | 2.100000  | -0.953677774  | 16.299379218  | -6.670701903  | 1 | 0 | 1 | # | st |
| 3358 | 1 | 5 | 2.100000  | -3.542027774  | 11.844829218  | -6.670701903  | 1 | 0 | 1 | # | st |
| 3359 | 1 | 5 | 2.100000  | -3.542052986  | 14.890769204  | -6.669722830  | 1 | 0 | 1 | # | st |
| 3360 | 1 | 5 | 2.100000  | -4.223022226  | 10.427920782  | -11.994298097 | 1 | 0 | 1 | # | st |
| 3361 | 1 | 1 | 1.575000  | 2.588555029   | -16.343538432 | -9.332229368  | 0 | 1 | 1 | # | ao |
| 3362 | 1 | 1 | 1.575000  | 0.000205029   | -11.888988432 | -9.332229368  | 0 | 1 | 1 | # | ao |
| 3363 | 1 | 1 | 1.575000  | 2.588144971   | -10.383761568 | -9.332770632  | 0 | 1 | 1 | # | ao |
| 3364 | 1 | 1 | 1.575000  | 5.176494971   | -14.838311568 | -9.332770632  | 0 | 1 | 1 | # | ao |
| 3365 | 1 | 2 | 0.425000  | 3.734650872   | -13.360932678 | -7.846384937  | 0 | 1 | 1 | # | ho |
| 3366 | 1 | 2 | 0.425000  | 1.146300872   | -17.815482678 | -7.846384937  | 0 | 1 | 1 | # | ho |
| 3367 | 1 | 2 | 0.425000  | 1.442049128   | -13.366367322 | -10.818615063 | 0 | 1 | 1 | # | ho |
| 3368 | 1 | 2 | 0.425000  | 4.030399128   | -8.911817322  | -10.818615063 | 0 | 1 | 1 | # | ho |
| 3369 | 1 | 3 | -1.050000 | 0.981314655   | -16.140698519 | -10.365922068 | 0 | 1 | 1 | # | ob |
| 3370 | 1 | 3 | -1.050000 | 5.023517264   | -11.513103874 | -12.564346262 | 0 | 1 | 1 | # | ob |
| 3371 | 1 | 3 | -1.050000 | 3.570244487   | -15.044550680 | -10.366131378 | 0 | 1 | 1 | # | ob |
| 3372 | 1 | 3 | -1.050000 | 2.434839092   | -10.769489700 | -12.565579711 | 0 | 1 | 1 | # | ob |
| 3373 | 1 | 3 | -1.050000 | 0.981894487   | -10.590000680 | -10.366131378 | 0 | 1 | 1 | # | ob |
| 3374 | 1 | 3 | -1.050000 | 1.606455513   | -11.682749320 | -8.298868622  | 0 | 1 | 1 | # | ob |
| 3375 | 1 | 3 | -1.050000 | 5.023189092   | -15.224039700 | -12.565579711 | 0 | 1 | 1 | # | ob |

|      |   |   |           |              |               |               |   |   |   |   |    |
|------|---|---|-----------|--------------|---------------|---------------|---|---|---|---|----|
| 3376 | 1 | 3 | -1.050000 | 1.607035345  | -15.041151481 | -8.299077932  | 0 | 1 | 1 | # | ob |
| 3377 | 1 | 3 | -1.050000 | 2.741532736  | -10.759646126 | -6.100653738  | 0 | 1 | 1 | # | ob |
| 3378 | 1 | 3 | -1.050000 | 4.195385345  | -10.586601481 | -8.299077932  | 0 | 1 | 1 | # | ob |
| 3379 | 1 | 3 | -1.050000 | 0.153182736  | -15.214196126 | -6.100653738  | 0 | 1 | 1 | # | ob |
| 3380 | 1 | 3 | -1.050000 | 2.741860908  | -15.957810300 | -6.099420289  | 0 | 1 | 1 | # | ob |
| 3381 | 1 | 4 | -0.950000 | 1.999257657  | -17.817259004 | -8.319917115  | 0 | 1 | 1 | # | oh |
| 3382 | 1 | 3 | -1.050000 | 4.667081651  | -17.814223030 | -6.271017583  | 0 | 1 | 1 | # | ob |
| 3383 | 1 | 4 | -0.950000 | 4.587607657  | -13.362709004 | -8.319917115  | 0 | 1 | 1 | # | oh |
| 3384 | 1 | 3 | -1.050000 | 2.078731651  | -13.359673030 | -6.271017583  | 0 | 1 | 1 | # | ob |
| 3385 | 1 | 4 | -0.950000 | 3.177442343  | -8.910040996  | -10.345082885 | 0 | 1 | 1 | # | oh |
| 3386 | 1 | 3 | -1.050000 | 0.509618349  | -8.913076970  | -12.393982417 | 0 | 1 | 1 | # | ob |
| 3387 | 1 | 4 | -0.950000 | 0.589092343  | -13.364590996 | -10.345082885 | 0 | 1 | 1 | # | oh |
| 3388 | 1 | 3 | -1.050000 | 3.097968349  | -13.367626970 | -12.393982417 | 0 | 1 | 1 | # | ob |
| 3389 | 1 | 3 | -1.050000 | 4.194805513  | -16.137299320 | -8.298868622  | 0 | 1 | 1 | # | ob |
| 3390 | 1 | 3 | -1.050000 | 0.153510908  | -11.503260300 | -6.099420289  | 0 | 1 | 1 | # | ob |
| 3391 | 1 | 3 | -1.050000 | 3.569664655  | -11.686148519 | -10.365922068 | 0 | 1 | 1 | # | ob |
| 3392 | 1 | 3 | -1.050000 | 2.435167264  | -15.967653874 | -12.564346262 | 0 | 1 | 1 | # | ob |
| 3393 | 1 | 5 | 2.100000  | 4.222997014  | -16.291080796 | -6.669722830  | 0 | 1 | 1 | # | st |
| 3394 | 1 | 5 | 2.100000  | 3.542027774  | -11.844829218 | -11.994298097 | 0 | 1 | 1 | # | st |
| 3395 | 1 | 5 | 2.100000  | 0.953702986  | -10.436219204 | -11.995277170 | 0 | 1 | 1 | # | st |
| 3396 | 1 | 5 | 2.100000  | 3.542052986  | -14.890769204 | -11.995277170 | 0 | 1 | 1 | # | st |
| 3397 | 1 | 5 | 2.100000  | 4.223022226  | -10.427920782 | -6.670701903  | 0 | 1 | 1 | # | st |
| 3398 | 1 | 5 | 2.100000  | 1.634672226  | -14.882470782 | -6.670701903  | 0 | 1 | 1 | # | st |
| 3399 | 1 | 5 | 2.100000  | 1.634647014  | -11.836530796 | -6.669722830  | 0 | 1 | 1 | # | st |
| 3400 | 1 | 5 | 2.100000  | 0.953677774  | -16.299379218 | -11.994298097 | 0 | 1 | 1 | # | st |
| 3401 | 1 | 1 | 1.575000  | 7.765255029  | -16.343538432 | -9.332229368  | 0 | 1 | 1 | # | ao |
| 3402 | 1 | 1 | 1.575000  | 5.176905029  | -11.888988432 | -9.332229368  | 0 | 1 | 1 | # | ao |
| 3403 | 1 | 1 | 1.575000  | 7.764844971  | -10.383761568 | -9.332770632  | 0 | 1 | 1 | # | ao |
| 3404 | 1 | 1 | 1.575000  | 10.353194971 | -14.838311568 | -9.332770632  | 0 | 1 | 1 | # | ao |
| 3405 | 1 | 2 | 0.425000  | 8.911350872  | -13.360932678 | -7.846384937  | 0 | 1 | 1 | # | ho |
| 3406 | 1 | 2 | 0.425000  | 6.323000872  | -17.815482678 | -7.846384937  | 0 | 1 | 1 | # | ho |
| 3407 | 1 | 2 | 0.425000  | 6.618749128  | -13.366367322 | -10.818615063 | 0 | 1 | 1 | # | ho |
| 3408 | 1 | 2 | 0.425000  | 9.207099128  | -8.911817322  | -10.818615063 | 0 | 1 | 1 | # | ho |
| 3409 | 1 | 3 | -1.050000 | 6.158014655  | -16.140698519 | -10.365922068 | 0 | 1 | 1 | # | ob |
| 3410 | 1 | 3 | -1.050000 | 10.200217264 | -11.513103874 | -12.564346262 | 0 | 1 | 1 | # | ob |
| 3411 | 1 | 3 | -1.050000 | 8.746944487  | -15.044550680 | -10.366131378 | 0 | 1 | 1 | # | ob |
| 3412 | 1 | 3 | -1.050000 | 7.611539092  | -10.769489700 | -12.565579711 | 0 | 1 | 1 | # | ob |
| 3413 | 1 | 3 | -1.050000 | 6.158594487  | -10.590000680 | -10.366131378 | 0 | 1 | 1 | # | ob |
| 3414 | 1 | 3 | -1.050000 | 6.783155513  | -11.682749320 | -8.298868622  | 0 | 1 | 1 | # | ob |
| 3415 | 1 | 3 | -1.050000 | 10.199890992 | -15.224039700 | -12.565579711 | 0 | 1 | 1 | # | ob |
| 3416 | 1 | 3 | -1.050000 | 6.783735345  | -15.041151481 | -8.299077932  | 0 | 1 | 1 | # | ob |
| 3417 | 1 | 3 | -1.050000 | 7.918232736  | -10.759646126 | -6.100653738  | 0 | 1 | 1 | # | ob |
| 3418 | 1 | 3 | -1.050000 | 9.372085345  | -10.586601481 | -8.299077932  | 0 | 1 | 1 | # | ob |
| 3419 | 1 | 3 | -1.050000 | 5.329882736  | -15.214196126 | -6.100653738  | 0 | 1 | 1 | # | ob |
| 3420 | 1 | 3 | -1.050000 | 7.918560908  | -15.957810300 | -6.099420289  | 0 | 1 | 1 | # | ob |
| 3421 | 1 | 4 | -0.950000 | 7.175957657  | -17.817259004 | -8.319917115  | 0 | 1 | 1 | # | oh |
| 3422 | 1 | 3 | -1.050000 | 9.843781651  | -17.814223030 | -6.271017583  | 0 | 1 | 1 | # | ob |
| 3423 | 1 | 4 | -0.950000 | 9.764307657  | -13.362709004 | -8.319917115  | 0 | 1 | 1 | # | oh |
| 3424 | 1 | 3 | -1.050000 | 7.255431651  | -13.359673030 | -6.271017583  | 0 | 1 | 1 | # | ob |
| 3425 | 1 | 4 | -0.950000 | 8.354142343  | -8.910040996  | -10.345082885 | 0 | 1 | 1 | # | oh |
| 3426 | 1 | 3 | -1.050000 | 5.686318349  | -8.913076970  | -12.393982417 | 0 | 1 | 1 | # | ob |
| 3427 | 1 | 4 | -0.950000 | 5.765792343  | -13.364590996 | -10.345082885 | 0 | 1 | 1 | # | oh |
| 3428 | 1 | 3 | -1.050000 | 8.274668349  | -13.367626970 | -12.393982417 | 0 | 1 | 1 | # | ob |
| 3429 | 1 | 3 | -1.050000 | 9.371505513  | -16.137299320 | -8.298868622  | 0 | 1 | 1 | # | ob |
| 3430 | 1 | 3 | -1.050000 | 5.330210908  | -11.503260300 | -6.099420289  | 0 | 1 | 1 | # | ob |
| 3431 | 1 | 3 | -1.050000 | 8.746364655  | -11.686148519 | -10.365922068 | 0 | 1 | 1 | # | ob |
| 3432 | 1 | 3 | -1.050000 | 7.611867264  | -15.967653874 | -12.564346262 | 0 | 1 | 1 | # | ob |
| 3433 | 1 | 5 | 2.100000  | 9.399697014  | -16.291080796 | -6.669722830  | 0 | 1 | 1 | # | st |
| 3434 | 1 | 5 | 2.100000  | 8.718727774  | -11.844829218 | -11.994298097 | 0 | 1 | 1 | # | st |
| 3435 | 1 | 5 | 2.100000  | 6.130402986  | -10.436219204 | -11.995277170 | 0 | 1 | 1 | # | st |
| 3436 | 1 | 5 | 2.100000  | 8.718752986  | -14.890769204 | -11.995277170 | 0 | 1 | 1 | # | st |
| 3437 | 1 | 5 | 2.100000  | 9.399722226  | -10.427920782 | -6.670701903  | 0 | 1 | 1 | # | st |
| 3438 | 1 | 5 | 2.100000  | 6.811372226  | -14.882470782 | -6.670701903  | 0 | 1 | 1 | # | st |
| 3439 | 1 | 5 | 2.100000  | 6.811347014  | -11.836530796 | -6.669722830  | 0 | 1 | 1 | # | st |
| 3440 | 1 | 5 | 2.100000  | 6.130377774  | -16.299379218 | -11.994298097 | 0 | 1 | 1 | # | st |
| 3441 | 1 | 1 | 1.575000  | 12.941955029 | -16.343538432 | -9.332229368  | 0 | 1 | 1 | # | ao |
| 3442 | 1 | 1 | 1.575000  | 10.353605029 | -11.888988432 | -9.332229368  | 0 | 1 | 1 | # | ao |
| 3443 | 1 | 1 | 1.575000  | 12.941544971 | -10.383761568 | -9.332770632  | 0 | 1 | 1 | # | ao |
| 3444 | 1 | 1 | 1.575000  | 15.529894971 | -14.838311568 | -9.332770632  | 0 | 1 | 1 | # | ao |
| 3445 | 1 | 2 | 0.425000  | 14.088050872 | -13.360932678 | -7.846384937  | 0 | 1 | 1 | # | ho |
| 3446 | 1 | 2 | 0.425000  | 11.499700872 | -17.815482678 | -7.846384937  | 0 | 1 | 1 | # | ho |
| 3447 | 1 | 2 | 0.425000  | 11.795449128 | -13.366367322 | -10.818615063 | 0 | 1 | 1 | # | ho |
| 3448 | 1 | 2 | 0.425000  | 14.383799128 | -8.911817322  | -10.818615063 | 0 | 1 | 1 | # | ho |
| 3449 | 1 | 3 | -1.050000 | 11.334714655 | -16.140698519 | -10.365922068 | 0 | 1 | 1 | # | ob |
| 3450 | 1 | 3 | -1.050000 | 15.376917264 | -11.513103874 | -12.564346262 | 0 | 1 | 1 | # | ob |
| 3451 | 1 | 3 | -1.050000 | 13.923644487 | -15.044550680 | -10.366131378 | 0 | 1 | 1 | # | ob |
| 3452 | 1 | 3 | -1.050000 | 12.788239092 | -10.769489700 | -12.565579711 | 0 | 1 | 1 | # | ob |
| 3453 | 1 | 3 | -1.050000 | 11.335294487 | -10.590000680 | -10.366131378 | 0 | 1 | 1 | # | ob |
| 3454 | 1 | 3 | -1.050000 | 11.959855513 | -11.682749320 | -8.298868622  | 0 | 1 | 1 | # | ob |
| 3455 | 1 | 3 | -1.050000 | 15.376589092 | -15.224039700 | -12.565579711 | 0 | 1 | 1 | # | ob |
| 3456 | 1 | 3 | -1.050000 | 11.960435345 | -15.041151481 | -8.299077932  | 0 | 1 | 1 | # | ob |
| 3457 | 1 | 3 | -1.050000 | 13.094932736 | -10.759646126 | -6.100653738  | 0 | 1 | 1 | # | ob |
| 3458 | 1 | 3 | -1.050000 | 14.548785345 | -10.586601481 | -8.299077932  | 0 | 1 | 1 | # | ob |
| 3459 | 1 | 3 | -1.050000 | 10.506582736 | -15.214196126 | -6.100653738  | 0 | 1 | 1 | # | ob |
| 3460 | 1 | 3 | -1.050000 | 13.095260908 | -15.957810300 | -6.099420289  | 0 | 1 | 1 | # | ob |
| 3461 | 1 | 4 | -0.950000 | 12.352657657 | -17.817259004 | -8.319917115  | 0 | 1 | 1 | # | oh |
| 3462 | 1 | 3 | -1.050000 | 15.020481651 | -17.814223030 | -6.271017583  | 0 | 1 | 1 | # | ob |
| 3463 | 1 | 4 | -0.950000 | 14.941007657 | -13.362709004 | -8.319917115  | 0 | 1 | 1 | # | oh |
| 3464 | 1 | 3 | -1.050000 | 12.432131651 | -13.359673030 | -6.271017583  | 0 | 1 | 1 | # | ob |
| 3465 | 1 | 4 | -0.950000 | 13.530842343 | -8.910040996  | -10.345082885 | 0 | 1 | 1 | # | oh |
| 3466 | 1 | 3 | -1.050000 | 10.863018349 | -8.913076970  | -12.393982417 | 0 | 1 | 1 | # | ob |
| 3467 | 1 | 4 | -0.950000 | 10.942492343 | -13.364590996 | -10.345082885 | 0 | 1 | 1 | # | oh |
| 3468 | 1 | 3 | -1.050000 | 13.451368349 | -13.367626970 | -12.393982417 | 0 | 1 | 1 | # | ob |

|      |   |   |           |               |               |               |   |   |   |   |    |
|------|---|---|-----------|---------------|---------------|---------------|---|---|---|---|----|
| 3469 | 1 | 3 | -1.050000 | 14.548205513  | -16.137299320 | -8.298868622  | 0 | 1 | 1 | # | ob |
| 3470 | 1 | 3 | -1.050000 | 10.506910908  | -11.503260300 | -6.099420289  | 0 | 1 | 1 | # | ob |
| 3471 | 1 | 3 | -1.050000 | 13.923064655  | -11.686148519 | -10.365922068 | 0 | 1 | 1 | # | ob |
| 3472 | 1 | 3 | -1.050000 | 12.788567264  | -15.967653874 | -12.564346262 | 0 | 1 | 1 | # | ob |
| 3473 | 1 | 5 | 2.100000  | 14.576397014  | -16.291080796 | -6.669722830  | 0 | 1 | 1 | # | st |
| 3474 | 1 | 5 | 2.100000  | 13.895427774  | -11.844829218 | -11.994298097 | 0 | 1 | 1 | # | st |
| 3475 | 1 | 5 | 2.100000  | 11.307102986  | -10.436219204 | -11.995277170 | 0 | 1 | 1 | # | st |
| 3476 | 1 | 5 | 2.100000  | 13.895452986  | -14.890769204 | -11.995277170 | 0 | 1 | 1 | # | st |
| 3477 | 1 | 5 | 2.100000  | 14.576422226  | -10.427920782 | -6.670701903  | 0 | 1 | 1 | # | st |
| 3478 | 1 | 5 | 2.100000  | 11.988072226  | -14.882470782 | -6.670701903  | 0 | 1 | 1 | # | st |
| 3479 | 1 | 5 | 2.100000  | 11.988047014  | -11.836530796 | -6.669722830  | 0 | 1 | 1 | # | st |
| 3480 | 1 | 5 | 2.100000  | 11.307077774  | -16.299379218 | -11.994298097 | 0 | 1 | 1 | # | st |
| 3481 | 1 | 1 | 1.575000  | -12.941544971 | -16.343538432 | -9.332229368  | 1 | 1 | 1 | # | ao |
| 3482 | 1 | 1 | 1.575000  | -15.529894971 | -11.888988432 | -9.332229368  | 1 | 1 | 1 | # | ao |
| 3483 | 1 | 1 | 1.575000  | -12.941955029 | -10.383761568 | -9.332770632  | 1 | 1 | 1 | # | ao |
| 3484 | 1 | 1 | 1.575000  | -10.353605029 | -14.838311568 | -9.332770632  | 1 | 1 | 1 | # | ao |
| 3485 | 1 | 2 | 0.425000  | -11.795449128 | -13.360932678 | -7.846384937  | 1 | 1 | 1 | # | ho |
| 3486 | 1 | 2 | 0.425000  | -14.383799128 | -17.815482678 | -7.846384937  | 1 | 1 | 1 | # | ho |
| 3487 | 1 | 2 | 0.425000  | -14.088050872 | -13.366367322 | -10.818615063 | 1 | 1 | 1 | # | ho |
| 3488 | 1 | 2 | 0.425000  | -11.499700872 | -8.911817322  | -10.818615063 | 1 | 1 | 1 | # | ho |
| 3489 | 1 | 3 | -1.050000 | -14.548785345 | -16.140698519 | -10.365922068 | 1 | 1 | 1 | # | ob |
| 3490 | 1 | 3 | -1.050000 | -10.506582736 | -11.513103874 | -12.564346262 | 1 | 1 | 1 | # | ob |
| 3491 | 1 | 3 | -1.050000 | -11.959855513 | -15.044550680 | -10.366131378 | 1 | 1 | 1 | # | ob |
| 3492 | 1 | 3 | -1.050000 | -13.095260908 | -10.769489700 | -12.565579711 | 1 | 1 | 1 | # | ob |
| 3493 | 1 | 3 | -1.050000 | -14.548205513 | -10.590000680 | -10.366131378 | 1 | 1 | 1 | # | ob |
| 3494 | 1 | 3 | -1.050000 | -13.923644487 | -11.682749320 | -8.298868622  | 1 | 1 | 1 | # | ob |
| 3495 | 1 | 3 | -1.050000 | -10.506910908 | -15.224039700 | -12.565579711 | 1 | 1 | 1 | # | ob |
| 3496 | 1 | 3 | -1.050000 | -13.923064655 | -15.041151481 | -8.299077932  | 1 | 1 | 1 | # | ob |
| 3497 | 1 | 3 | -1.050000 | -12.788567264 | -10.759646126 | -6.100653738  | 1 | 1 | 1 | # | ob |
| 3498 | 1 | 3 | -1.050000 | -11.334714655 | -10.586601481 | -8.299077932  | 1 | 1 | 1 | # | ob |
| 3499 | 1 | 3 | -1.050000 | -15.376917264 | -15.214196126 | -6.100653738  | 1 | 1 | 1 | # | ob |
| 3500 | 1 | 3 | -1.050000 | -12.788239092 | -15.957810300 | -6.099420289  | 1 | 1 | 1 | # | ob |
| 3501 | 1 | 4 | -0.950000 | -13.530842343 | -17.817259004 | -8.319917115  | 1 | 1 | 1 | # | oh |
| 3502 | 1 | 3 | -1.050000 | -10.863018349 | -17.814223030 | -6.271017583  | 1 | 1 | 1 | # | ob |
| 3503 | 1 | 4 | -0.950000 | -10.942492343 | -13.362709004 | -8.319917115  | 1 | 1 | 1 | # | oh |
| 3504 | 1 | 3 | -1.050000 | -13.451368349 | -13.359673030 | -6.271017583  | 1 | 1 | 1 | # | ob |
| 3505 | 1 | 4 | -0.950000 | -12.352657657 | -8.910040996  | -10.345082885 | 1 | 1 | 1 | # | oh |
| 3506 | 1 | 3 | -1.050000 | -15.020481651 | -8.913076970  | -12.393982417 | 1 | 1 | 1 | # | ob |
| 3507 | 1 | 4 | -0.950000 | -14.941007657 | -13.364590996 | -10.345082885 | 1 | 1 | 1 | # | oh |
| 3508 | 1 | 3 | -1.050000 | -12.432131651 | -13.367626970 | -12.393982417 | 1 | 1 | 1 | # | ob |
| 3509 | 1 | 3 | -1.050000 | -11.335294487 | -16.137299320 | -8.298868622  | 1 | 1 | 1 | # | ob |
| 3510 | 1 | 3 | -1.050000 | -15.376589092 | -11.503260300 | -6.099420289  | 1 | 1 | 1 | # | ob |
| 3511 | 1 | 3 | -1.050000 | -11.960435345 | -11.686148519 | -10.365922068 | 1 | 1 | 1 | # | ob |
| 3512 | 1 | 3 | -1.050000 | -13.094932736 | -15.967653874 | -12.564346262 | 1 | 1 | 1 | # | ob |
| 3513 | 1 | 5 | 2.100000  | -11.307102986 | -16.291080796 | -6.669722830  | 1 | 1 | 1 | # | st |
| 3514 | 1 | 5 | 2.100000  | -11.988072226 | -11.844829218 | -11.994298097 | 1 | 1 | 1 | # | st |
| 3515 | 1 | 5 | 2.100000  | -14.576397014 | -10.436219204 | -11.995277170 | 1 | 1 | 1 | # | st |
| 3516 | 1 | 5 | 2.100000  | -11.988047014 | -14.890769204 | -11.995277170 | 1 | 1 | 1 | # | st |
| 3517 | 1 | 5 | 2.100000  | -11.307077774 | -10.427920782 | -6.670701903  | 1 | 1 | 1 | # | st |
| 3518 | 1 | 5 | 2.100000  | -13.895427774 | -14.882470782 | -6.670701903  | 1 | 1 | 1 | # | st |
| 3519 | 1 | 5 | 2.100000  | -13.895452986 | -11.836530796 | -6.669722830  | 1 | 1 | 1 | # | st |
| 3520 | 1 | 5 | 2.100000  | -14.576422226 | -16.299379218 | -11.994298097 | 1 | 1 | 1 | # | st |
| 3521 | 1 | 1 | 1.575000  | -7.764844971  | -16.343538432 | -9.332229368  | 1 | 1 | 1 | # | ao |
| 3522 | 1 | 1 | 1.575000  | -10.353194971 | -11.888988432 | -9.332229368  | 1 | 1 | 1 | # | ao |
| 3523 | 1 | 1 | 1.575000  | -7.765255029  | -10.383761568 | -9.332770632  | 1 | 1 | 1 | # | ao |
| 3524 | 1 | 1 | 1.575000  | -5.176905029  | -14.838311568 | -9.332770632  | 1 | 1 | 1 | # | ao |
| 3525 | 1 | 2 | 0.425000  | -6.618749128  | -13.360932678 | -7.846384937  | 1 | 1 | 1 | # | ho |
| 3526 | 1 | 2 | 0.425000  | -9.207099128  | -17.815482678 | -7.846384937  | 1 | 1 | 1 | # | ho |
| 3527 | 1 | 2 | 0.425000  | -8.911350872  | -13.366367322 | -10.818615063 | 1 | 1 | 1 | # | ho |
| 3528 | 1 | 2 | 0.425000  | -6.323000872  | -8.911817322  | -10.818615063 | 1 | 1 | 1 | # | ho |
| 3529 | 1 | 3 | -1.050000 | -9.372085345  | -16.140698519 | -10.365922068 | 1 | 1 | 1 | # | ob |
| 3530 | 1 | 3 | -1.050000 | -5.329882736  | -11.513103874 | -12.564346262 | 1 | 1 | 1 | # | ob |
| 3531 | 1 | 3 | -1.050000 | -6.783155513  | -15.044550680 | -10.366131378 | 1 | 1 | 1 | # | ob |
| 3532 | 1 | 3 | -1.050000 | -7.918560908  | -10.769489700 | -12.565579711 | 1 | 1 | 1 | # | ob |
| 3533 | 1 | 3 | -1.050000 | -9.371505513  | -10.590000680 | -10.366131378 | 1 | 1 | 1 | # | ob |
| 3534 | 1 | 3 | -1.050000 | -8.746944487  | -11.682749320 | -8.298868622  | 1 | 1 | 1 | # | ob |
| 3535 | 1 | 3 | -1.050000 | -5.330210908  | -15.224039700 | -12.565579711 | 1 | 1 | 1 | # | ob |
| 3536 | 1 | 3 | -1.050000 | -8.746364655  | -15.041151481 | -8.299077932  | 1 | 1 | 1 | # | ob |
| 3537 | 1 | 3 | -1.050000 | -7.611867264  | -10.759646126 | -6.100653738  | 1 | 1 | 1 | # | ob |
| 3538 | 1 | 3 | -1.050000 | -6.158014655  | -10.586601481 | -8.299077932  | 1 | 1 | 1 | # | ob |
| 3539 | 1 | 3 | -1.050000 | -10.200217264 | -15.214196126 | -6.100653738  | 1 | 1 | 1 | # | ob |
| 3540 | 1 | 3 | -1.050000 | -7.611539092  | -15.957810300 | -6.099420289  | 1 | 1 | 1 | # | ob |
| 3541 | 1 | 4 | -0.950000 | -8.354142343  | -17.817259004 | -8.319917115  | 1 | 1 | 1 | # | oh |
| 3542 | 1 | 3 | -1.050000 | -5.686318349  | -17.814223030 | -6.271017583  | 1 | 1 | 1 | # | ob |
| 3543 | 1 | 4 | -0.950000 | -5.765792343  | -13.362709004 | -8.319917115  | 1 | 1 | 1 | # | oh |
| 3544 | 1 | 3 | -1.050000 | -8.274668349  | -13.359673030 | -6.271017583  | 1 | 1 | 1 | # | ob |
| 3545 | 1 | 4 | -0.950000 | -7.175957657  | -8.910040996  | -10.345082885 | 1 | 1 | 1 | # | oh |
| 3546 | 1 | 3 | -1.050000 | -9.843781651  | -8.913076970  | -12.393982417 | 1 | 1 | 1 | # | ob |
| 3547 | 1 | 4 | -0.950000 | -9.764307657  | -13.364590996 | -10.345082885 | 1 | 1 | 1 | # | oh |
| 3548 | 1 | 3 | -1.050000 | -7.255431651  | -13.367626970 | -12.393982417 | 1 | 1 | 1 | # | ob |
| 3549 | 1 | 3 | -1.050000 | -6.158594487  | -16.137299320 | -8.298868622  | 1 | 1 | 1 | # | ob |
| 3550 | 1 | 3 | -1.050000 | -10.19989092  | -11.503260300 | -6.099420289  | 1 | 1 | 1 | # | ob |
| 3551 | 1 | 3 | -1.050000 | -6.783735345  | -11.686148519 | -10.365922068 | 1 | 1 | 1 | # | ob |
| 3552 | 1 | 3 | -1.050000 | -7.918232736  | -15.967653874 | -12.564346262 | 1 | 1 | 1 | # | ob |
| 3553 | 1 | 5 | 2.100000  | -6.130402986  | -16.291080796 | -6.669722830  | 1 | 1 | 1 | # | st |
| 3554 | 1 | 5 | 2.100000  | -6.811372226  | -11.844829218 | -11.994298097 | 1 | 1 | 1 | # | st |
| 3555 | 1 | 5 | 2.100000  | -9.399697014  | -10.436219204 | -11.995277170 | 1 | 1 | 1 | # | st |
| 3556 | 1 | 5 | 2.100000  | -6.811347014  | -14.890769204 | -11.995277170 | 1 | 1 | 1 | # | st |
| 3557 | 1 | 5 | 2.100000  | -6.130377774  | -10.427920782 | -6.670701903  | 1 | 1 | 1 | # | st |
| 3558 | 1 | 5 | 2.100000  | -8.718727774  | -14.882470782 | -6.670701903  | 1 | 1 | 1 | # | st |
| 3559 | 1 | 5 | 2.100000  | -8.718752986  | -11.836530796 | -6.669722830  | 1 | 1 | 1 | # | st |
| 3560 | 1 | 5 | 2.100000  | -9.399722226  | -16.299379218 | -11.994298097 | 1 | 1 | 1 | # | st |
| 3561 | 1 | 1 | 1.575000  | -2.588144971  | -16.343538432 | -9.332229368  | 1 | 1 | 1 | # | ao |

|      |   |   |           |              |               |               |   |   |   |    |
|------|---|---|-----------|--------------|---------------|---------------|---|---|---|----|
| 3562 | 1 | 1 | 1.575000  | -5.176494971 | -11.888988432 | -9.332229368  | 1 | 1 | 1 | ao |
| 3563 | 1 | 1 | 1.575000  | -2.588555029 | -10.383761568 | -9.332770632  | 1 | 1 | 1 | ao |
| 3564 | 1 | 1 | 1.575000  | -0.000205029 | -14.838311568 | -9.332770632  | 1 | 1 | 1 | ao |
| 3565 | 1 | 2 | 0.425000  | -1.442049128 | -13.360932678 | -7.846384937  | 1 | 1 | 1 | ho |
| 3566 | 1 | 2 | 0.425000  | -4.030399128 | -17.815482678 | -7.846384937  | 1 | 1 | 1 | ho |
| 3567 | 1 | 2 | 0.425000  | -3.734650872 | -13.366367322 | -10.818615063 | 1 | 1 | 1 | ho |
| 3568 | 1 | 2 | 0.425000  | -1.146300872 | -8.911817322  | -10.818615063 | 1 | 1 | 1 | ho |
| 3569 | 1 | 3 | -1.050000 | -4.195385345 | -16.140698519 | -10.365922068 | 1 | 1 | 1 | ob |
| 3570 | 1 | 3 | -1.050000 | -0.153182736 | -11.513103874 | -12.564346262 | 1 | 1 | 1 | ob |
| 3571 | 1 | 3 | -1.050000 | -1.606455513 | -15.044550680 | -10.366131378 | 1 | 1 | 1 | ob |
| 3572 | 1 | 3 | -1.050000 | -2.741860908 | -10.769489700 | -12.565579711 | 1 | 1 | 1 | ob |
| 3573 | 1 | 3 | -1.050000 | -4.194805513 | -10.590000680 | -10.366131378 | 1 | 1 | 1 | ob |
| 3574 | 1 | 3 | -1.050000 | -3.570244487 | -11.682749320 | -8.298868622  | 1 | 1 | 1 | ob |
| 3575 | 1 | 3 | -1.050000 | -0.153510908 | -15.224039700 | -12.565579711 | 1 | 1 | 1 | ob |
| 3576 | 1 | 3 | -1.050000 | -3.569664655 | -15.041151481 | -8.299077932  | 1 | 1 | 1 | ob |
| 3577 | 1 | 3 | -1.050000 | -2.435167264 | -10.759646126 | -6.100653738  | 1 | 1 | 1 | ob |
| 3578 | 1 | 3 | -1.050000 | -0.981314655 | -10.586601481 | -8.299077932  | 1 | 1 | 1 | ob |
| 3579 | 1 | 3 | -1.050000 | -5.023517264 | -15.214196126 | -6.100653738  | 1 | 1 | 1 | ob |
| 3580 | 1 | 3 | -1.050000 | -2.434839092 | -15.957810300 | -6.099420289  | 1 | 1 | 1 | ob |
| 3581 | 1 | 4 | -0.950000 | -3.177442343 | -17.817259004 | -8.319917115  | 1 | 1 | 1 | oh |
| 3582 | 1 | 3 | -1.050000 | -0.509618349 | -17.814223030 | -6.271017583  | 1 | 1 | 1 | ob |
| 3583 | 1 | 4 | -0.950000 | -0.589092343 | -13.362709004 | -8.319917115  | 1 | 1 | 1 | oh |
| 3584 | 1 | 3 | -1.050000 | -3.097968349 | -13.359673030 | -6.271017583  | 1 | 1 | 1 | ob |
| 3585 | 1 | 4 | -0.950000 | -1.999257657 | -8.910040996  | -10.345082885 | 1 | 1 | 1 | oh |
| 3586 | 1 | 3 | -1.050000 | -4.667081651 | -8.913076970  | -12.393982417 | 1 | 1 | 1 | ob |
| 3587 | 1 | 4 | -0.950000 | -4.587607657 | -13.364590996 | -10.345082885 | 1 | 1 | 1 | oh |
| 3588 | 1 | 3 | -1.050000 | -2.078731651 | -13.367626970 | -12.393982417 | 1 | 1 | 1 | ob |
| 3589 | 1 | 3 | -1.050000 | -0.981894487 | -16.137299320 | -8.298868622  | 1 | 1 | 1 | ob |
| 3590 | 1 | 3 | -1.050000 | -5.023189092 | -11.503260300 | -6.099420289  | 1 | 1 | 1 | ob |
| 3591 | 1 | 3 | -1.050000 | -1.607035345 | -11.686148519 | -10.365922068 | 1 | 1 | 1 | ob |
| 3592 | 1 | 3 | -1.050000 | -2.741532736 | -15.967653874 | -12.564346262 | 1 | 1 | 1 | ob |
| 3593 | 1 | 5 | 2.100000  | -0.953702986 | -16.291080796 | -6.669722830  | 1 | 1 | 1 | st |
| 3594 | 1 | 5 | 2.100000  | -1.634672226 | -11.844829218 | -11.994298097 | 1 | 1 | 1 | st |
| 3595 | 1 | 5 | 2.100000  | -4.222997014 | -10.436219204 | -11.995277170 | 1 | 1 | 1 | st |
| 3596 | 1 | 5 | 2.100000  | -1.634647014 | -14.890769204 | -11.995277170 | 1 | 1 | 1 | st |
| 3597 | 1 | 5 | 2.100000  | -0.953677774 | -10.427920782 | -6.670701903  | 1 | 1 | 1 | st |
| 3598 | 1 | 5 | 2.100000  | -3.542027774 | -14.882470782 | -6.670701903  | 1 | 1 | 1 | st |
| 3599 | 1 | 5 | 2.100000  | -3.542052986 | -11.836530796 | -6.669722830  | 1 | 1 | 1 | st |
| 3600 | 1 | 5 | 2.100000  | -4.223022226 | -16.299379218 | -11.994298097 | 1 | 1 | 1 | st |
| 3601 | 1 | 1 | 1.575000  | 2.588555029  | -7.434438432  | -9.332229368  | 0 | 1 | 1 | ao |
| 3602 | 1 | 1 | 1.575000  | 0.000205029  | -2.979888432  | -9.332229368  | 0 | 1 | 1 | ao |
| 3603 | 1 | 1 | 1.575000  | 2.588144971  | -1.474661568  | -9.332770632  | 0 | 1 | 1 | ao |
| 3604 | 1 | 1 | 1.575000  | 5.176494971  | -5.929211568  | -9.332770632  | 0 | 1 | 1 | ao |
| 3605 | 1 | 2 | 0.425000  | 3.734650872  | -4.451832678  | -7.846384937  | 0 | 1 | 1 | ho |
| 3606 | 1 | 2 | 0.425000  | 1.146300872  | -8.906382678  | -7.846384937  | 0 | 1 | 1 | ho |
| 3607 | 1 | 2 | 0.425000  | 1.442049128  | -4.457267322  | -10.818615063 | 0 | 1 | 1 | ho |
| 3608 | 1 | 2 | 0.425000  | 4.030399128  | -0.002717322  | -10.818615063 | 0 | 1 | 1 | ho |
| 3609 | 1 | 3 | -1.050000 | 0.981314655  | -7.231598519  | -10.365922068 | 0 | 1 | 1 | ob |
| 3610 | 1 | 3 | -1.050000 | 5.023517264  | -2.604003874  | -12.564346262 | 0 | 1 | 1 | ob |
| 3611 | 1 | 3 | -1.050000 | 3.570244487  | -6.135450680  | -10.366131378 | 0 | 1 | 1 | ob |
| 3612 | 1 | 3 | -1.050000 | 2.434839092  | -1.860389700  | -12.565579711 | 0 | 1 | 1 | ob |
| 3613 | 1 | 3 | -1.050000 | 0.981894487  | -1.680900680  | -10.366131378 | 0 | 1 | 1 | ob |
| 3614 | 1 | 3 | -1.050000 | 1.606455513  | -2.773649320  | -8.298868622  | 0 | 1 | 1 | ob |
| 3615 | 1 | 3 | -1.050000 | 5.023189092  | -6.314939700  | -12.565579711 | 0 | 1 | 1 | ob |
| 3616 | 1 | 3 | -1.050000 | 1.607035345  | -6.132051481  | -8.299077932  | 0 | 1 | 1 | ob |
| 3617 | 1 | 3 | -1.050000 | 2.741532736  | -1.850546126  | -6.100653738  | 0 | 1 | 1 | ob |
| 3618 | 1 | 3 | -1.050000 | 4.195385345  | -1.677501481  | -8.299077932  | 0 | 1 | 1 | ob |
| 3619 | 1 | 3 | -1.050000 | 0.153182736  | -6.305096126  | -6.100653738  | 0 | 1 | 1 | ob |
| 3620 | 1 | 3 | -1.050000 | 2.741860908  | -7.048710300  | -6.099420289  | 0 | 1 | 1 | ob |
| 3621 | 1 | 4 | -0.950000 | 1.999257657  | -8.908159004  | -8.319917115  | 0 | 1 | 1 | oh |
| 3622 | 1 | 3 | -1.050000 | 4.667081651  | -8.905123030  | -6.271017583  | 0 | 1 | 1 | ob |
| 3623 | 1 | 4 | -0.950000 | 4.587607657  | -4.453609004  | -8.319917115  | 0 | 1 | 1 | oh |
| 3624 | 1 | 3 | -1.050000 | 2.078731651  | -4.450573030  | -6.271017583  | 0 | 1 | 1 | ob |
| 3625 | 1 | 4 | -0.950000 | 3.177442343  | -0.000940996  | -10.345082885 | 0 | 1 | 1 | oh |
| 3626 | 1 | 3 | -1.050000 | 0.509618349  | -0.003976970  | -12.393982417 | 0 | 1 | 1 | ob |
| 3627 | 1 | 4 | -0.950000 | 0.589092343  | -4.455490996  | -10.345082885 | 0 | 1 | 1 | oh |
| 3628 | 1 | 3 | -1.050000 | 3.097968349  | -4.458526970  | -12.393982417 | 0 | 1 | 1 | ob |
| 3629 | 1 | 3 | -1.050000 | 4.194805513  | -7.228199320  | -8.298868622  | 0 | 1 | 1 | ob |
| 3630 | 1 | 3 | -1.050000 | 0.153510908  | -2.594160300  | -6.099420289  | 0 | 1 | 1 | ob |
| 3631 | 1 | 3 | -1.050000 | 3.569664655  | -2.777048519  | -10.365922068 | 0 | 1 | 1 | ob |
| 3632 | 1 | 3 | -1.050000 | 2.435167264  | -7.058553874  | -12.564346262 | 0 | 1 | 1 | ob |
| 3633 | 1 | 5 | 2.100000  | 4.222997014  | -7.381980796  | -6.669722830  | 0 | 1 | 1 | st |
| 3634 | 1 | 5 | 2.100000  | 3.542027774  | -2.935729218  | -11.994298097 | 0 | 1 | 1 | st |
| 3635 | 1 | 5 | 2.100000  | 0.953702986  | -1.527119204  | -11.995277170 | 0 | 1 | 1 | st |
| 3636 | 1 | 5 | 2.100000  | 3.542052986  | -5.981669204  | -11.995277170 | 0 | 1 | 1 | st |
| 3637 | 1 | 5 | 2.100000  | 4.223022226  | -1.518820782  | -6.670701903  | 0 | 1 | 1 | st |
| 3638 | 1 | 5 | 2.100000  | 1.634672226  | -5.973370782  | -6.670701903  | 0 | 1 | 1 | st |
| 3639 | 1 | 5 | 2.100000  | 1.634647014  | -2.927430796  | -6.669722830  | 0 | 1 | 1 | st |
| 3640 | 1 | 5 | 2.100000  | 0.953677774  | -7.390279218  | -11.994298097 | 0 | 1 | 1 | st |
| 3641 | 1 | 1 | 1.575000  | 7.765255029  | -7.434438432  | -9.332229368  | 0 | 1 | 1 | ao |
| 3642 | 1 | 1 | 1.575000  | 5.176905029  | -2.979888432  | -9.332229368  | 0 | 1 | 1 | ao |
| 3643 | 1 | 1 | 1.575000  | 7.764844971  | -1.474661568  | -9.332770632  | 0 | 1 | 1 | ao |
| 3644 | 1 | 1 | 1.575000  | 10.353194971 | -5.929211568  | -9.332770632  | 0 | 1 | 1 | ao |
| 3645 | 1 | 2 | 0.425000  | 8.911350872  | -4.451832678  | -7.846384937  | 0 | 1 | 1 | ho |
| 3646 | 1 | 2 | 0.425000  | 6.323000872  | -8.906382678  | -7.846384937  | 0 | 1 | 1 | ho |
| 3647 | 1 | 2 | 0.425000  | 6.618749128  | -4.457267322  | -10.818615063 | 0 | 1 | 1 | ho |
| 3648 | 1 | 2 | 0.425000  | 9.207099128  | -0.002717322  | -10.818615063 | 0 | 1 | 1 | ho |
| 3649 | 1 | 3 | -1.050000 | 6.158014655  | -7.231598519  | -10.365922068 | 0 | 1 | 1 | ob |
| 3650 | 1 | 3 | -1.050000 | 10.200217264 | -2.604003874  | -12.564346262 | 0 | 1 | 1 | ob |
| 3651 | 1 | 3 | -1.050000 | 8.746944487  | -6.135450680  | -10.366131378 | 0 | 1 | 1 | ob |
| 3652 | 1 | 3 | -1.050000 | 7.611539092  | -1.860389700  | -12.565579711 | 0 | 1 | 1 | ob |
| 3653 | 1 | 3 | -1.050000 | 6.158594487  | -1.680900680  | -10.366131378 | 0 | 1 | 1 | ob |
| 3654 | 1 | 3 | -1.050000 | 6.783155513  | -2.773649320  | -8.298868622  | 0 | 1 | 1 | ob |

|      |   |   |           |               |              |               |   |   |   |   |    |
|------|---|---|-----------|---------------|--------------|---------------|---|---|---|---|----|
| 3655 | 1 | 3 | -1.050000 | 10.199889092  | -6.314939700 | -12.565579711 | 0 | 1 | 1 | # | ob |
| 3656 | 1 | 3 | -1.050000 | 6.783735345   | -6.132051481 | -8.299077932  | 0 | 1 | 1 | # | ob |
| 3657 | 1 | 3 | -1.050000 | 7.918232736   | -1.850546126 | -6.100653738  | 0 | 1 | 1 | # | ob |
| 3658 | 1 | 3 | -1.050000 | 9.372085345   | -1.677501481 | -8.299077932  | 0 | 1 | 1 | # | ob |
| 3659 | 1 | 3 | -1.050000 | 5.329882736   | -6.305096126 | -6.100653738  | 0 | 1 | 1 | # | ob |
| 3660 | 1 | 3 | -1.050000 | 7.918560908   | -7.048710300 | -6.099420289  | 0 | 1 | 1 | # | ob |
| 3661 | 1 | 4 | -0.950000 | 7.175957657   | -8.908159004 | -8.319917115  | 0 | 1 | 1 | # | oh |
| 3662 | 1 | 3 | -1.050000 | 9.843781651   | -8.905123030 | -6.271017583  | 0 | 1 | 1 | # | ob |
| 3663 | 1 | 4 | -0.950000 | 9.764307657   | -4.453609004 | -8.319917115  | 0 | 1 | 1 | # | oh |
| 3664 | 1 | 3 | -1.050000 | 7.255431651   | -4.450573030 | -6.271017583  | 0 | 1 | 1 | # | ob |
| 3665 | 1 | 4 | -0.950000 | 8.354142343   | -0.000940996 | -10.345082885 | 0 | 1 | 1 | # | oh |
| 3666 | 1 | 3 | -1.050000 | 5.686318349   | -0.003976970 | -12.393982417 | 0 | 1 | 1 | # | ob |
| 3667 | 1 | 4 | -0.950000 | 5.765792343   | -4.455490996 | -10.345082885 | 0 | 1 | 1 | # | oh |
| 3668 | 1 | 3 | -1.050000 | 8.274668349   | -4.458526970 | -12.393982417 | 0 | 1 | 1 | # | ob |
| 3669 | 1 | 3 | -1.050000 | 9.371505513   | -7.228199320 | -8.298868622  | 0 | 1 | 1 | # | ob |
| 3670 | 1 | 3 | -1.050000 | 5.330210908   | -2.594160300 | -6.099420289  | 0 | 1 | 1 | # | ob |
| 3671 | 1 | 3 | -1.050000 | 8.746364655   | -2.777048519 | -10.365922068 | 0 | 1 | 1 | # | ob |
| 3672 | 1 | 3 | -1.050000 | 7.611867264   | -7.058553874 | -12.564346262 | 0 | 1 | 1 | # | ob |
| 3673 | 1 | 5 | 2.100000  | 9.399697014   | -7.381980796 | -6.669722830  | 0 | 1 | 1 | # | st |
| 3674 | 1 | 5 | 2.100000  | 8.718727774   | -2.935729218 | -11.994298097 | 0 | 1 | 1 | # | st |
| 3675 | 1 | 5 | 2.100000  | 6.130402986   | -1.527119204 | -11.995277170 | 0 | 1 | 1 | # | st |
| 3676 | 1 | 5 | 2.100000  | 8.718752986   | -5.981669204 | -11.995277170 | 0 | 1 | 1 | # | st |
| 3677 | 1 | 5 | 2.100000  | 9.399722226   | -1.518820782 | -6.670701903  | 0 | 1 | 1 | # | st |
| 3678 | 1 | 5 | 2.100000  | 6.811372226   | -5.973370782 | -6.670701903  | 0 | 1 | 1 | # | st |
| 3679 | 1 | 5 | 2.100000  | 6.811347014   | -2.927430796 | -6.669722830  | 0 | 1 | 1 | # | st |
| 3680 | 1 | 5 | 2.100000  | 6.130377774   | -7.390279218 | -11.994298097 | 0 | 1 | 1 | # | st |
| 3681 | 1 | 1 | 1.575000  | 12.941955029  | -7.434438432 | -9.332229368  | 0 | 1 | 1 | # | ao |
| 3682 | 1 | 1 | 1.575000  | 10.353605029  | -2.979888432 | -9.332229368  | 0 | 1 | 1 | # | ao |
| 3683 | 1 | 1 | 1.575000  | 12.941544971  | -1.474661568 | -9.332770632  | 0 | 1 | 1 | # | ao |
| 3684 | 1 | 1 | 1.575000  | 15.529894971  | -5.929211568 | -9.332770632  | 0 | 1 | 1 | # | ao |
| 3685 | 1 | 2 | 0.425000  | 14.088050872  | -4.451832678 | -7.846384937  | 0 | 1 | 1 | # | ho |
| 3686 | 1 | 2 | 0.425000  | 11.499700872  | -8.906382678 | -7.846384937  | 0 | 1 | 1 | # | ho |
| 3687 | 1 | 2 | 0.425000  | 11.795449128  | -4.457267322 | -10.818615063 | 0 | 1 | 1 | # | ho |
| 3688 | 1 | 2 | 0.425000  | 14.383799128  | -0.002717322 | -10.818615063 | 0 | 1 | 1 | # | ho |
| 3689 | 1 | 3 | -1.050000 | 11.334714655  | -7.231598519 | -10.365922068 | 0 | 1 | 1 | # | ob |
| 3690 | 1 | 3 | -1.050000 | 15.376917264  | -2.604003874 | -12.564346262 | 0 | 1 | 1 | # | ob |
| 3691 | 1 | 3 | -1.050000 | 13.923644487  | -6.135450680 | -10.366131378 | 0 | 1 | 1 | # | ob |
| 3692 | 1 | 3 | -1.050000 | 12.788239092  | -1.860389700 | -12.565579711 | 0 | 1 | 1 | # | ob |
| 3693 | 1 | 3 | -1.050000 | 11.335294487  | -1.680900680 | -10.366131378 | 0 | 1 | 1 | # | ob |
| 3694 | 1 | 3 | -1.050000 | 11.959855513  | -2.773649320 | -8.298868622  | 0 | 1 | 1 | # | ob |
| 3695 | 1 | 3 | -1.050000 | 15.376589092  | -6.314939700 | -12.565579711 | 0 | 1 | 1 | # | ob |
| 3696 | 1 | 3 | -1.050000 | 11.960435345  | -6.132051481 | -8.299077932  | 0 | 1 | 1 | # | ob |
| 3697 | 1 | 3 | -1.050000 | 13.094932736  | -1.850546126 | -6.100653738  | 0 | 1 | 1 | # | ob |
| 3698 | 1 | 3 | -1.050000 | 14.548785345  | -1.677501481 | -8.299077932  | 0 | 1 | 1 | # | ob |
| 3699 | 1 | 3 | -1.050000 | 10.506582736  | -6.305096126 | -6.100653738  | 0 | 1 | 1 | # | ob |
| 3700 | 1 | 3 | -1.050000 | 13.095260908  | -7.048710300 | -6.099420289  | 0 | 1 | 1 | # | ob |
| 3701 | 1 | 4 | -0.950000 | 12.352657657  | -8.908159004 | -8.319917115  | 0 | 1 | 1 | # | oh |
| 3702 | 1 | 3 | -1.050000 | 15.020481651  | -8.905123030 | -6.271017583  | 0 | 1 | 1 | # | ob |
| 3703 | 1 | 4 | -0.950000 | 14.941007657  | -4.453609004 | -8.319917115  | 0 | 1 | 1 | # | oh |
| 3704 | 1 | 3 | -1.050000 | 12.432131651  | -4.450573030 | -6.271017583  | 0 | 1 | 1 | # | ob |
| 3705 | 1 | 4 | -0.950000 | 13.530842343  | -0.000940996 | -10.345082885 | 0 | 1 | 1 | # | oh |
| 3706 | 1 | 3 | -1.050000 | 10.863018349  | -0.003976970 | -12.393982417 | 0 | 1 | 1 | # | ob |
| 3707 | 1 | 4 | -0.950000 | 10.942492343  | -4.455490996 | -10.345082885 | 0 | 1 | 1 | # | oh |
| 3708 | 1 | 3 | -1.050000 | 13.451368349  | -4.458526970 | -12.393982417 | 0 | 1 | 1 | # | ob |
| 3709 | 1 | 3 | -1.050000 | 14.548205513  | -7.228199320 | -8.298868622  | 0 | 1 | 1 | # | ob |
| 3710 | 1 | 3 | -1.050000 | 10.506910908  | -2.594160300 | -6.099420289  | 0 | 1 | 1 | # | ob |
| 3711 | 1 | 3 | -1.050000 | 13.923064655  | -2.777048519 | -10.365922068 | 0 | 1 | 1 | # | ob |
| 3712 | 1 | 3 | -1.050000 | 12.788567264  | -7.058553874 | -12.564346262 | 0 | 1 | 1 | # | ob |
| 3713 | 1 | 5 | 2.100000  | 14.576397014  | -7.381980796 | -6.669722830  | 0 | 1 | 1 | # | st |
| 3714 | 1 | 5 | 2.100000  | 13.895427774  | -2.935729218 | -11.994298097 | 0 | 1 | 1 | # | st |
| 3715 | 1 | 5 | 2.100000  | 11.307102986  | -1.527119204 | -11.995277170 | 0 | 1 | 1 | # | st |
| 3716 | 1 | 5 | 2.100000  | 13.895452986  | -5.981669204 | -11.995277170 | 0 | 1 | 1 | # | st |
| 3717 | 1 | 5 | 2.100000  | 14.576422226  | -1.518820782 | -6.670701903  | 0 | 1 | 1 | # | st |
| 3718 | 1 | 5 | 2.100000  | 11.988072226  | -5.973370782 | -6.670701903  | 0 | 1 | 1 | # | st |
| 3719 | 1 | 5 | 2.100000  | 11.988047014  | -2.927430796 | -6.669722830  | 0 | 1 | 1 | # | st |
| 3720 | 1 | 5 | 2.100000  | 11.307077774  | -7.390279218 | -11.994298097 | 0 | 1 | 1 | # | st |
| 3721 | 1 | 1 | 1.575000  | -12.941544971 | -7.434438432 | -9.332229368  | 1 | 1 | 1 | # | ao |
| 3722 | 1 | 1 | 1.575000  | -15.529894971 | -2.979888432 | -9.332229368  | 1 | 1 | 1 | # | ao |
| 3723 | 1 | 1 | 1.575000  | -12.941955029 | -1.474661568 | -9.332770632  | 1 | 1 | 1 | # | ao |
| 3724 | 1 | 1 | 1.575000  | -10.353605029 | -5.929211568 | -9.332770632  | 1 | 1 | 1 | # | ao |
| 3725 | 1 | 2 | 0.425000  | -11.795449128 | -4.451832678 | -7.846384937  | 1 | 1 | 1 | # | ho |
| 3726 | 1 | 2 | 0.425000  | -14.383799128 | -8.906382678 | -7.846384937  | 1 | 1 | 1 | # | ho |
| 3727 | 1 | 2 | 0.425000  | -14.088050872 | -4.457267322 | -10.818615063 | 1 | 1 | 1 | # | ho |
| 3728 | 1 | 2 | 0.425000  | -11.499700872 | -0.002717322 | -10.818615063 | 1 | 1 | 1 | # | ho |
| 3729 | 1 | 3 | -1.050000 | -14.548785345 | -7.231598519 | -10.365922068 | 1 | 1 | 1 | # | ob |
| 3730 | 1 | 3 | -1.050000 | -10.506582736 | -2.604003874 | -12.564346262 | 1 | 1 | 1 | # | ob |
| 3731 | 1 | 3 | -1.050000 | -11.959855513 | -6.135450680 | -10.366131378 | 1 | 1 | 1 | # | ob |
| 3732 | 1 | 3 | -1.050000 | -13.095260908 | -1.860389700 | -12.565579711 | 1 | 1 | 1 | # | ob |
| 3733 | 1 | 3 | -1.050000 | -14.548205513 | -1.680900680 | -10.366131378 | 1 | 1 | 1 | # | ob |
| 3734 | 1 | 3 | -1.050000 | -13.923644487 | -2.773649320 | -8.298868622  | 1 | 1 | 1 | # | ob |
| 3735 | 1 | 3 | -1.050000 | -10.506910908 | -6.314939700 | -12.565579711 | 1 | 1 | 1 | # | ob |
| 3736 | 1 | 3 | -1.050000 | -13.923064655 | -6.132051481 | -8.299077932  | 1 | 1 | 1 | # | ob |
| 3737 | 1 | 3 | -1.050000 | -12.788567264 | -1.850546126 | -6.100653738  | 1 | 1 | 1 | # | ob |
| 3738 | 1 | 3 | -1.050000 | -11.334714655 | -1.677501481 | -8.299077932  | 1 | 1 | 1 | # | ob |
| 3739 | 1 | 3 | -1.050000 | -15.376917264 | -6.305096126 | -6.100653738  | 1 | 1 | 1 | # | ob |
| 3740 | 1 | 3 | -1.050000 | -12.788239092 | -7.048710300 | -6.099420289  | 1 | 1 | 1 | # | ob |
| 3741 | 1 | 4 | -0.950000 | -13.530842343 | -8.908159004 | -8.319917115  | 1 | 1 | 1 | # | oh |
| 3742 | 1 | 3 | -1.050000 | -10.863018349 | -8.905123030 | -6.271017583  | 1 | 1 | 1 | # | ob |
| 3743 | 1 | 4 | -0.950000 | -10.942492343 | -4.453609004 | -8.319917115  | 1 | 1 | 1 | # | oh |
| 3744 | 1 | 3 | -1.050000 | -13.451368349 | -4.450573030 | -6.271017583  | 1 | 1 | 1 | # | ob |
| 3745 | 1 | 4 | -0.950000 | -12.352657657 | -0.000940996 | -10.345082885 | 1 | 1 | 1 | # | oh |
| 3746 | 1 | 3 | -1.050000 | -15.020481651 | -0.003976970 | -12.393982417 | 1 | 1 | 1 | # | ob |
| 3747 | 1 | 4 | -0.950000 | -14.941007657 | -4.455490996 | -10.345082885 | 1 | 1 | 1 | # | oh |



|      |   |   |           |               |              |               |   |   |   |   |    |
|------|---|---|-----------|---------------|--------------|---------------|---|---|---|---|----|
| 3748 | 1 | 3 | -1.050000 | -12.432131651 | -4.458526970 | -12.393982417 | 1 | 1 | 1 | # | ob |
| 3749 | 1 | 3 | -1.050000 | -11.335294487 | -7.228199320 | -8.298868622  | 1 | 1 | 1 | # | ob |
| 3750 | 1 | 3 | -1.050000 | -15.376589092 | -2.594160300 | -6.099420289  | 1 | 1 | 1 | # | ob |
| 3751 | 1 | 3 | -1.050000 | -11.960435345 | -2.777048519 | -10.365922068 | 1 | 1 | 1 | # | ob |
| 3752 | 1 | 3 | -1.050000 | -13.094932736 | -7.058553874 | -12.564346262 | 1 | 1 | 1 | # | ob |
| 3753 | 1 | 5 | 2.100000  | -11.307102986 | -7.381980796 | -6.669722830  | 1 | 1 | 1 | # | st |
| 3754 | 1 | 5 | 2.100000  | -11.988072226 | -2.935729218 | -11.994298097 | 1 | 1 | 1 | # | st |
| 3755 | 1 | 5 | 2.100000  | -14.576397014 | -1.527119204 | -11.995277170 | 1 | 1 | 1 | # | st |
| 3756 | 1 | 5 | 2.100000  | -11.988047014 | -5.981669204 | -11.995277170 | 1 | 1 | 1 | # | st |
| 3757 | 1 | 5 | 2.100000  | -11.307077774 | -1.518820782 | -6.670701903  | 1 | 1 | 1 | # | st |
| 3758 | 1 | 5 | 2.100000  | -13.895427774 | -5.973370782 | -6.670701903  | 1 | 1 | 1 | # | st |
| 3759 | 1 | 5 | 2.100000  | -13.895452986 | -2.927430796 | -6.669722830  | 1 | 1 | 1 | # | st |
| 3760 | 1 | 5 | 2.100000  | -14.576422226 | -7.390279218 | -11.994298097 | 1 | 1 | 1 | # | st |
| 3761 | 1 | 1 | 1.575000  | -7.764844971  | -7.434438432 | -9.332229368  | 1 | 1 | 1 | # | ao |
| 3762 | 1 | 1 | 1.575000  | -10.353194971 | -2.979888432 | -9.332229368  | 1 | 1 | 1 | # | ao |
| 3763 | 1 | 1 | 1.575000  | -7.765255029  | -1.474661568 | -9.332770632  | 1 | 1 | 1 | # | ao |
| 3764 | 1 | 1 | 1.575000  | -5.176905029  | -5.929211568 | -9.332770632  | 1 | 1 | 1 | # | ao |
| 3765 | 1 | 2 | 0.425000  | -6.618749128  | -4.451832678 | -7.846384937  | 1 | 1 | 1 | # | ho |
| 3766 | 1 | 2 | 0.425000  | -9.207099128  | -8.906382678 | -7.846384937  | 1 | 1 | 1 | # | ho |
| 3767 | 1 | 2 | 0.425000  | -8.911350872  | -4.457267322 | -10.818615063 | 1 | 1 | 1 | # | ho |
| 3768 | 1 | 2 | 0.425000  | -6.323000872  | -0.002717322 | -10.818615063 | 1 | 1 | 1 | # | ho |
| 3769 | 1 | 3 | -1.050000 | -9.372085345  | -7.231598519 | -10.365922068 | 1 | 1 | 1 | # | ob |
| 3770 | 1 | 3 | -1.050000 | -5.329882736  | -2.604003874 | -12.564346262 | 1 | 1 | 1 | # | ob |
| 3771 | 1 | 3 | -1.050000 | -6.783155513  | -6.135450680 | -10.366131378 | 1 | 1 | 1 | # | ob |
| 3772 | 1 | 3 | -1.050000 | -7.918560908  | -1.860389700 | -12.565579711 | 1 | 1 | 1 | # | ob |
| 3773 | 1 | 3 | -1.050000 | -9.371505513  | -1.680900680 | -10.366131378 | 1 | 1 | 1 | # | ob |
| 3774 | 1 | 3 | -1.050000 | -8.746944487  | -2.773649320 | -8.298868622  | 1 | 1 | 1 | # | ob |
| 3775 | 1 | 3 | -1.050000 | -5.330210908  | -6.314939700 | -12.565579711 | 1 | 1 | 1 | # | ob |
| 3776 | 1 | 3 | -1.050000 | -8.746364655  | -6.132051481 | -8.299077932  | 1 | 1 | 1 | # | ob |
| 3777 | 1 | 3 | -1.050000 | -7.611867264  | -1.850546126 | -6.100653738  | 1 | 1 | 1 | # | ob |
| 3778 | 1 | 3 | -1.050000 | -6.158014655  | -1.677501481 | -8.299077932  | 1 | 1 | 1 | # | ob |
| 3779 | 1 | 3 | -1.050000 | -10.200217264 | -6.305096126 | -6.100653738  | 1 | 1 | 1 | # | ob |
| 3780 | 1 | 3 | -1.050000 | -7.611539092  | -7.048710300 | -6.099420289  | 1 | 1 | 1 | # | ob |
| 3781 | 1 | 4 | -0.950000 | -8.354142343  | -8.908159004 | -8.319917115  | 1 | 1 | 1 | # | oh |
| 3782 | 1 | 3 | -1.050000 | -5.686318349  | -8.905123030 | -6.271017583  | 1 | 1 | 1 | # | ob |
| 3783 | 1 | 4 | -0.950000 | -5.765792343  | -4.453609004 | -8.319917115  | 1 | 1 | 1 | # | oh |
| 3784 | 1 | 3 | -1.050000 | -8.274668349  | -4.450573030 | -6.271017583  | 1 | 1 | 1 | # | ob |
| 3785 | 1 | 4 | -0.950000 | -7.175957657  | -0.000940996 | -10.345082885 | 1 | 1 | 1 | # | oh |
| 3786 | 1 | 3 | -1.050000 | -9.843781651  | -0.003976970 | -12.393982417 | 1 | 1 | 1 | # | ob |
| 3787 | 1 | 4 | -0.950000 | -9.764307657  | -4.455490996 | -10.345082885 | 1 | 1 | 1 | # | oh |
| 3788 | 1 | 3 | -1.050000 | -7.255431651  | -4.458526970 | -12.393982417 | 1 | 1 | 1 | # | ob |
| 3789 | 1 | 3 | -1.050000 | -6.158594487  | -7.228199320 | -8.298868622  | 1 | 1 | 1 | # | ob |
| 3790 | 1 | 3 | -1.050000 | -10.199889092 | -2.594160300 | -6.099420289  | 1 | 1 | 1 | # | ob |
| 3791 | 1 | 3 | -1.050000 | -6.783735345  | -2.777048519 | -10.365922068 | 1 | 1 | 1 | # | ob |
| 3792 | 1 | 3 | -1.050000 | -7.918232736  | -7.058553874 | -12.564346262 | 1 | 1 | 1 | # | ob |
| 3793 | 1 | 5 | 2.100000  | -6.130402986  | -7.381980796 | -6.669722830  | 1 | 1 | 1 | # | st |
| 3794 | 1 | 5 | 2.100000  | -6.811372226  | -2.935729218 | -11.994298097 | 1 | 1 | 1 | # | st |
| 3795 | 1 | 5 | 2.100000  | -9.399697014  | -1.527119204 | -11.995277170 | 1 | 1 | 1 | # | st |
| 3796 | 1 | 5 | 2.100000  | -6.811347014  | -5.981669204 | -11.995277170 | 1 | 1 | 1 | # | st |
| 3797 | 1 | 5 | 2.100000  | -6.130377774  | -1.518820782 | -6.670701903  | 1 | 1 | 1 | # | st |
| 3798 | 1 | 5 | 2.100000  | -8.718727774  | -5.973370782 | -6.670701903  | 1 | 1 | 1 | # | st |
| 3799 | 1 | 5 | 2.100000  | -8.718752986  | -2.927430796 | -6.669722830  | 1 | 1 | 1 | # | st |
| 3800 | 1 | 5 | 2.100000  | -9.399722226  | -7.390279218 | -11.994298097 | 1 | 1 | 1 | # | st |
| 3801 | 1 | 1 | 1.575000  | -2.588144971  | -7.434438432 | -9.332229368  | 1 | 1 | 1 | # | ao |
| 3802 | 1 | 1 | 1.575000  | -5.176494971  | -2.979888432 | -9.332229368  | 1 | 1 | 1 | # | ao |
| 3803 | 1 | 1 | 1.575000  | -2.588555029  | -1.474661568 | -9.332770632  | 1 | 1 | 1 | # | ao |
| 3804 | 1 | 1 | 1.575000  | -0.000205029  | -5.929211568 | -9.332770632  | 1 | 1 | 1 | # | ao |
| 3805 | 1 | 2 | 0.425000  | -1.442049128  | -4.451832678 | -7.846384937  | 1 | 1 | 1 | # | ho |
| 3806 | 1 | 2 | 0.425000  | -4.030399128  | -8.906382678 | -7.846384937  | 1 | 1 | 1 | # | ho |
| 3807 | 1 | 2 | 0.425000  | -3.734650872  | -4.457267322 | -10.818615063 | 1 | 1 | 1 | # | ho |
| 3808 | 1 | 2 | 0.425000  | -1.146300872  | -0.002717322 | -10.818615063 | 1 | 1 | 1 | # | ho |
| 3809 | 1 | 3 | -1.050000 | -4.195385345  | -7.231598519 | -10.365922068 | 1 | 1 | 1 | # | ob |
| 3810 | 1 | 3 | -1.050000 | -0.153182736  | -2.604003874 | -12.564346262 | 1 | 1 | 1 | # | ob |
| 3811 | 1 | 3 | -1.050000 | -1.606455513  | -6.135450680 | -10.366131378 | 1 | 1 | 1 | # | ob |
| 3812 | 1 | 3 | -1.050000 | -2.741860908  | -1.860389700 | -12.565579711 | 1 | 1 | 1 | # | ob |
| 3813 | 1 | 3 | -1.050000 | -4.194805513  | -1.680900680 | -10.366131378 | 1 | 1 | 1 | # | ob |
| 3814 | 1 | 3 | -1.050000 | -3.570244487  | -2.773649320 | -8.298868622  | 1 | 1 | 1 | # | ob |
| 3815 | 1 | 3 | -1.050000 | -0.153510908  | -6.314939700 | -12.565579711 | 1 | 1 | 1 | # | ob |
| 3816 | 1 | 3 | -1.050000 | -3.569664655  | -6.132051481 | -8.299077932  | 1 | 1 | 1 | # | ob |
| 3817 | 1 | 3 | -1.050000 | -2.435167264  | -1.850546126 | -6.100653738  | 1 | 1 | 1 | # | ob |
| 3818 | 1 | 3 | -1.050000 | -0.981314655  | -1.677501481 | -8.299077932  | 1 | 1 | 1 | # | ob |
| 3819 | 1 | 3 | -1.050000 | -5.023517264  | -6.305096126 | -6.100653738  | 1 | 1 | 1 | # | ob |
| 3820 | 1 | 3 | -1.050000 | -2.434839092  | -7.048710300 | -6.099420289  | 1 | 1 | 1 | # | ob |
| 3821 | 1 | 4 | -0.950000 | -3.177442343  | -8.908159004 | -8.319917115  | 1 | 1 | 1 | # | oh |
| 3822 | 1 | 3 | -1.050000 | -0.509618349  | -8.905123030 | -6.271017583  | 1 | 1 | 1 | # | ob |
| 3823 | 1 | 4 | -0.950000 | -0.589092343  | -4.453609004 | -8.319917115  | 1 | 1 | 1 | # | oh |
| 3824 | 1 | 3 | -1.050000 | -3.097968349  | -4.450573030 | -6.271017583  | 1 | 1 | 1 | # | ob |
| 3825 | 1 | 4 | -0.950000 | -1.999257657  | -0.000940996 | -10.345082885 | 1 | 1 | 1 | # | oh |
| 3826 | 1 | 3 | -1.050000 | -4.667081651  | -0.003976970 | -12.393982417 | 1 | 1 | 1 | # | ob |
| 3827 | 1 | 4 | -0.950000 | -4.587607657  | -4.455490996 | -10.345082885 | 1 | 1 | 1 | # | oh |
| 3828 | 1 | 3 | -1.050000 | -2.078731651  | -4.458526970 | -12.393982417 | 1 | 1 | 1 | # | ob |
| 3829 | 1 | 3 | -1.050000 | -0.981894487  | -7.228199320 | -8.298868622  | 1 | 1 | 1 | # | ob |
| 3830 | 1 | 3 | -1.050000 | -5.023189092  | -2.594160300 | -6.099420289  | 1 | 1 | 1 | # | ob |
| 3831 | 1 | 3 | -1.050000 | -1.607035345  | -2.777048519 | -10.365922068 | 1 | 1 | 1 | # | ob |
| 3832 | 1 | 3 | -1.050000 | -2.741532736  | -7.058553874 | -12.564346262 | 1 | 1 | 1 | # | ob |
| 3833 | 1 | 5 | 2.100000  | -0.953702986  | -7.381980796 | -6.669722830  | 1 | 1 | 1 | # | st |
| 3834 | 1 | 5 | 2.100000  | -1.634672226  | -2.935729218 | -11.994298097 | 1 | 1 | 1 | # | st |
| 3835 | 1 | 5 | 2.100000  | -4.222997014  | -1.527119204 | -11.995277170 | 1 | 1 | 1 | # | st |
| 3836 | 1 | 5 | 2.100000  | -1.634647014  | -5.981669204 | -11.995277170 | 1 | 1 | 1 | # | st |
| 3837 | 1 | 5 | 2.100000  | -0.953677774  | -1.518820782 | -6.670701903  | 1 | 1 | 1 | # | st |
| 3838 | 1 | 5 | 2.100000  | -3.542027774  | -5.973370782 | -6.670701903  | 1 | 1 | 1 | # | st |
| 3839 | 1 | 5 | 2.100000  | -3.542052986  | -2.927430796 | -6.669722830  | 1 | 1 | 1 | # | st |
| 3840 | 1 | 5 | 2.100000  | -4.223022226  | -7.390279218 | -11.994298097 | 1 | 1 | 1 | # | st |

Bonds

|    |   |     |     |
|----|---|-----|-----|
| 1  | 1 | 5   | 23  |
| 2  | 1 | 6   | 21  |
| 3  | 1 | 7   | 27  |
| 4  | 1 | 8   | 25  |
| 5  | 1 | 45  | 63  |
| 6  | 1 | 46  | 61  |
| 7  | 1 | 47  | 67  |
| 8  | 1 | 48  | 65  |
| 9  | 1 | 85  | 103 |
| 10 | 1 | 86  | 101 |
| 11 | 1 | 87  | 107 |
| 12 | 1 | 88  | 105 |
| 13 | 1 | 125 | 143 |
| 14 | 1 | 126 | 141 |
| 15 | 1 | 127 | 147 |
| 16 | 1 | 128 | 145 |
| 17 | 1 | 165 | 183 |
| 18 | 1 | 166 | 181 |
| 19 | 1 | 167 | 187 |
| 20 | 1 | 168 | 185 |
| 21 | 1 | 205 | 223 |
| 22 | 1 | 206 | 221 |
| 23 | 1 | 207 | 227 |
| 24 | 1 | 208 | 225 |
| 25 | 1 | 245 | 263 |
| 26 | 1 | 246 | 261 |
| 27 | 1 | 247 | 267 |
| 28 | 1 | 248 | 265 |
| 29 | 1 | 285 | 303 |
| 30 | 1 | 286 | 301 |
| 31 | 1 | 287 | 307 |
| 32 | 1 | 288 | 305 |
| 33 | 1 | 325 | 343 |
| 34 | 1 | 326 | 341 |
| 35 | 1 | 327 | 347 |
| 36 | 1 | 328 | 345 |
| 37 | 1 | 365 | 383 |
| 38 | 1 | 366 | 381 |
| 39 | 1 | 367 | 387 |
| 40 | 1 | 368 | 385 |
| 41 | 1 | 405 | 423 |
| 42 | 1 | 406 | 421 |
| 43 | 1 | 407 | 427 |
| 44 | 1 | 408 | 425 |
| 45 | 1 | 445 | 463 |
| 46 | 1 | 446 | 461 |
| 47 | 1 | 447 | 467 |
| 48 | 1 | 448 | 465 |
| 49 | 1 | 485 | 503 |
| 50 | 1 | 486 | 501 |
| 51 | 1 | 487 | 507 |
| 52 | 1 | 488 | 505 |
| 53 | 1 | 525 | 543 |
| 54 | 1 | 526 | 541 |
| 55 | 1 | 527 | 547 |
| 56 | 1 | 528 | 545 |
| 57 | 1 | 565 | 583 |
| 58 | 1 | 566 | 581 |
| 59 | 1 | 567 | 587 |
| 60 | 1 | 568 | 585 |
| 61 | 1 | 605 | 623 |
| 62 | 1 | 606 | 621 |
| 63 | 1 | 607 | 627 |
| 64 | 1 | 608 | 625 |
| 65 | 1 | 645 | 663 |
| 66 | 1 | 646 | 661 |
| 67 | 1 | 647 | 667 |
| 68 | 1 | 648 | 665 |
| 69 | 1 | 685 | 703 |
| 70 | 1 | 686 | 701 |
| 71 | 1 | 687 | 707 |
| 72 | 1 | 688 | 705 |
| 73 | 1 | 725 | 743 |
| 74 | 1 | 726 | 741 |
| 75 | 1 | 727 | 747 |
| 76 | 1 | 728 | 745 |
| 77 | 1 | 765 | 783 |
| 78 | 1 | 766 | 781 |
| 79 | 1 | 767 | 787 |
| 80 | 1 | 768 | 785 |
| 81 | 1 | 805 | 823 |
| 82 | 1 | 806 | 821 |
| 83 | 1 | 807 | 827 |
| 84 | 1 | 808 | 825 |
| 85 | 1 | 845 | 863 |
| 86 | 1 | 846 | 861 |
| 87 | 1 | 847 | 867 |
| 88 | 1 | 848 | 865 |
| 89 | 1 | 885 | 903 |
| 90 | 1 | 886 | 901 |

91 1 887 907  
92 1 888 905  
93 1 925 943  
94 1 926 941  
95 1 927 947  
96 1 928 945  
97 1 965 983  
98 1 966 981  
99 1 967 987  
100 1 968 985  
101 1 1005 1023  
102 1 1006 1021  
103 1 1007 1027  
104 1 1008 1025  
105 1 1045 1063  
106 1 1046 1061  
107 1 1047 1067  
108 1 1048 1065  
109 1 1085 1103  
110 1 1086 1101  
111 1 1087 1107  
112 1 1088 1105  
113 1 1125 1143  
114 1 1126 1141  
115 1 1127 1147  
116 1 1128 1145  
117 1 1165 1183  
118 1 1166 1181  
119 1 1167 1187  
120 1 1168 1185  
121 1 1205 1223  
122 1 1206 1221  
123 1 1207 1227  
124 1 1208 1225  
125 1 1245 1263  
126 1 1246 1261  
127 1 1247 1267  
128 1 1248 1265  
129 1 1285 1303  
130 1 1286 1301  
131 1 1287 1307  
132 1 1288 1305  
133 1 1325 1343  
134 1 1326 1341  
135 1 1327 1347  
136 1 1328 1345  
137 1 1365 1383  
138 1 1366 1381  
139 1 1367 1387  
140 1 1368 1385  
141 1 1405 1423  
142 1 1406 1421  
143 1 1407 1427  
144 1 1408 1425  
145 1 1445 1463  
146 1 1446 1461  
147 1 1447 1467  
148 1 1448 1465  
149 1 1485 1503  
150 1 1486 1501  
151 1 1487 1507  
152 1 1488 1505  
153 1 1525 1543  
154 1 1526 1541  
155 1 1527 1547  
156 1 1528 1545  
157 1 1565 1583  
158 1 1566 1581  
159 1 1567 1587  
160 1 1568 1585  
161 1 1605 1623  
162 1 1606 1621  
163 1 1607 1627  
164 1 1608 1625  
165 1 1645 1663  
166 1 1646 1661  
167 1 1647 1667  
168 1 1648 1665  
169 1 1685 1703  
170 1 1686 1701  
171 1 1687 1707  
172 1 1688 1705  
173 1 1725 1743  
174 1 1726 1741  
175 1 1727 1747  
176 1 1728 1745  
177 1 1765 1783  
178 1 1766 1781  
179 1 1767 1787  
180 1 1768 1785  
181 1 1805 1823  
182 1 1806 1821  
183 1 1807 1827

184 1 1808 1825  
185 1 1845 1863  
186 1 1846 1861  
187 1 1847 1867  
188 1 1848 1865  
189 1 1885 1903  
190 1 1886 1901  
191 1 1887 1907  
192 1 1888 1905  
193 1 1925 1943  
194 1 1926 1941  
195 1 1927 1947  
196 1 1928 1945  
197 1 1965 1983  
198 1 1966 1981  
199 1 1967 1987  
200 1 1968 1985  
201 1 2005 2023  
202 1 2006 2021  
203 1 2007 2027  
204 1 2008 2025  
205 1 2045 2063  
206 1 2046 2061  
207 1 2047 2067  
208 1 2048 2065  
209 1 2085 2103  
210 1 2086 2101  
211 1 2087 2107  
212 1 2088 2105  
213 1 2125 2143  
214 1 2126 2141  
215 1 2127 2147  
216 1 2128 2145  
217 1 2165 2183  
218 1 2166 2181  
219 1 2167 2187  
220 1 2168 2185  
221 1 2205 2223  
222 1 2206 2221  
223 1 2207 2227  
224 1 2208 2225  
225 1 2245 2263  
226 1 2246 2261  
227 1 2247 2267  
228 1 2248 2265  
229 1 2285 2303  
230 1 2286 2301  
231 1 2287 2307  
232 1 2288 2305  
233 1 2325 2343  
234 1 2326 2341  
235 1 2327 2347  
236 1 2328 2345  
237 1 2365 2383  
238 1 2366 2381  
239 1 2367 2387  
240 1 2368 2385  
241 1 2405 2423  
242 1 2406 2421  
243 1 2407 2427  
244 1 2408 2425  
245 1 2445 2463  
246 1 2446 2461  
247 1 2447 2467  
248 1 2448 2465  
249 1 2485 2503  
250 1 2486 2501  
251 1 2487 2507  
252 1 2488 2505  
253 1 2525 2543  
254 1 2526 2541  
255 1 2527 2547  
256 1 2528 2545  
257 1 2565 2583  
258 1 2566 2581  
259 1 2567 2587  
260 1 2568 2585  
261 1 2605 2623  
262 1 2606 2621  
263 1 2607 2627  
264 1 2608 2625  
265 1 2645 2663  
266 1 2646 2661  
267 1 2647 2667  
268 1 2648 2665  
269 1 2685 2703  
270 1 2686 2701  
271 1 2687 2707  
272 1 2688 2705  
273 1 2725 2743  
274 1 2726 2741  
275 1 2727 2747  
276 1 2728 2745

277 1 2765 2783  
278 1 2766 2781  
279 1 2767 2787  
280 1 2768 2785  
281 1 2805 2823  
282 1 2806 2821  
283 1 2807 2827  
284 1 2808 2825  
285 1 2845 2863  
286 1 2846 2861  
287 1 2847 2867  
288 1 2848 2865  
289 1 2885 2903  
290 1 2886 2901  
291 1 2887 2907  
292 1 2888 2905  
293 1 2925 2943  
294 1 2926 2941  
295 1 2927 2947  
296 1 2928 2945  
297 1 2965 2983  
298 1 2966 2981  
299 1 2967 2987  
300 1 2968 2985  
301 1 3005 3023  
302 1 3006 3021  
303 1 3007 3027  
304 1 3008 3025  
305 1 3045 3063  
306 1 3046 3061  
307 1 3047 3067  
308 1 3048 3065  
309 1 3085 3103  
310 1 3086 3101  
311 1 3087 3107  
312 1 3088 3105  
313 1 3125 3143  
314 1 3126 3141  
315 1 3127 3147  
316 1 3128 3145  
317 1 3165 3183  
318 1 3166 3181  
319 1 3167 3187  
320 1 3168 3185  
321 1 3205 3223  
322 1 3206 3221  
323 1 3207 3227  
324 1 3208 3225  
325 1 3245 3263  
326 1 3246 3261  
327 1 3247 3267  
328 1 3248 3265  
329 1 3285 3303  
330 1 3286 3301  
331 1 3287 3307  
332 1 3288 3305  
333 1 3325 3343  
334 1 3326 3341  
335 1 3327 3347  
336 1 3328 3345  
337 1 3365 3383  
338 1 3366 3381  
339 1 3367 3387  
340 1 3368 3385  
341 1 3405 3423  
342 1 3406 3421  
343 1 3407 3427  
344 1 3408 3425  
345 1 3445 3463  
346 1 3446 3461  
347 1 3447 3467  
348 1 3448 3465  
349 1 3485 3503  
350 1 3486 3501  
351 1 3487 3507  
352 1 3488 3505  
353 1 3525 3543  
354 1 3526 3541  
355 1 3527 3547  
356 1 3528 3545  
357 1 3565 3583  
358 1 3566 3581  
359 1 3567 3587  
360 1 3568 3585  
361 1 3605 3623  
362 1 3606 3621  
363 1 3607 3627  
364 1 3608 3625  
365 1 3645 3663  
366 1 3646 3661  
367 1 3647 3667  
368 1 3648 3665  
369 1 3685 3703

```
370 1 3686 3701
371 1 3687 3707
372 1 3688 3705
373 1 3725 3743
374 1 3726 3741
375 1 3727 3747
376 1 3728 3745
377 1 3765 3783
378 1 3766 3781
379 1 3767 3787
380 1 3768 3785
381 1 3805 3823
382 1 3806 3821
383 1 3807 3827
384 1 3808 3825
```

## LAMMPS Input Script:

```
units      real
atom_style full
boundary   p p p
pair_style lj/cut/coul/long 10
pair_modify mix arithmetic
bond_style morse

read_data  bulkpy-6x4x4-noangClean.data

kspace_style ewald 0.0001
special_bonds lj 0.0 0.0 0.5
special_bonds coul 0.0 0.0 0.8333

thermo_style custom step etotal ke pe ebond eangle edihed evdwl ecoul elong temp press vol lx ly lz
thermo_modify lost error
thermo     100

timestep   1.0
run_style  respa 2 2 pair 1 kspace 2

velocity all create 298 1103 dist gaussian

fix 1 all nve
fix 2 all temp/rescale 1 298.0 298.0 5 1.0

restart 10000 restart.1 restart.2

run 1000000

unfix 2

run 1000000

timestep .001

unfix 1
fix 3 all nve
fix 4 all press/berendsen aniso 10000 1.0 1000.0
fix 5 all temp/rescale 1 298.0 298.0 5 1.0

run 1000000

unfix 4
unfix 5
fix 6 all press/berendsen aniso 1.0 1.0 10000.0
fix 7 all temp/berendsen 298.0 298.0 100.0
timestep .01

run 1000000

timestep .1
unfix 6
unfix 7
fix 8 all press/berendsen aniso 1.0 1.0 100000.0
fix 9 all temp/berendsen 298.0 298.0 100.0

run 1000000

timestep 1.0

unfix 8
unfix 9
fix 10 all press/berendsen aniso 1.0 1.0 1000000.0
fix 11 all temp/berendsen 298.0 298.0 100.0

run 10000000

unfix 10
unfix 11

run 10000000
```

dump 1 all custom 2 dump.velo type id x y z vx vy vz  
dump\_modify 1 sort 2

run 5000000

## 010 Pyrophyllite Face Protonated

### LAMMPS Data File:

LAMMPS data file. clayff2lmp v1.0.0 / 02 Oct 2017 / CGMM for 010-6x4x4Clean

3984 atoms  
480 bonds  
816 angles  
0 dihedrals  
0 impropers  
  
7 atom types  
3 bond types types  
3 angle types types  
  
-15.530100000 15.530100000 xlo xhi  
-27.818200000 27.818200000 ylo yhi  
-18.665000000 18.665000000 zlo zhi

#### Masses

1 26.981540 # ao  
2 1.007970 # ho  
3 15.999400 # ob  
4 15.999400 # oho  
5 15.999400 # oht  
6 15.999400 # oh  
7 28.085500 # st

#### Pair Coeffs # lj/cut/coul/long

1 0.0000013297 4.2713219316 # ao  
2 0.0000000000 0.0000000000 # ho  
3 0.1554164124 3.1655200879 # ob  
4 0.1554164124 3.1655200879 # oho  
5 0.1554164124 3.1655200879 # oht  
6 0.1554164124 3.1655200879 # oh  
7 0.0000018402 3.3019566252 # st

#### Bond Coeffs # harmonic

1 132.2491 2.1815 0.945 # ho-oh  
2 132.2491 2.1815 0.945 # ho-oho  
3 132.2491 2.1815 0.945 # ho-oht

#### Angle Coeffs # harmonic

1 15.0000 110.0000 # ao-oho-ho  
2 15.0000 100.0000 # ho-oht-st  
3 15.0000 110.0000 # ao-oh-ho

#### Atoms # full

1 1 1 1.575000 2.588555029 1.474661568 9.332770632 0 0 0 # ao  
2 1 1 1.575000 0.000205029 5.929211568 9.332770632 0 0 0 # ao  
3 1 1 1.575000 2.588144971 7.434438432 9.332229368 0 0 0 # ao  
4 1 1 1.575000 5.176494971 2.979888432 9.332229368 0 0 0 # ao  
5 1 2 0.425000 3.734650872 4.457267322 10.818615063 0 0 0 # ho  
6 1 2 0.425000 1.146300872 0.002717322 10.818615063 0 0 0 # ho  
7 1 2 0.425000 1.442049128 4.451832678 7.846384937 0 0 0 # ho  
8 1 2 0.425000 4.030399128 8.906382678 7.846384937 0 0 0 # ho  
9 1 3 -1.050000 0.981314655 1.677501481 8.299077932 0 0 0 # ob  
10 1 3 -1.050000 5.023517264 6.305096126 6.100653738 0 0 0 # ob  
11 1 3 -1.050000 3.570244487 2.773649320 8.298868622 0 0 0 # ob  
12 1 3 -1.050000 2.434839092 7.048710300 6.099420289 0 0 0 # ob  
13 1 3 -1.050000 0.981894487 7.228199320 8.298868622 0 0 0 # ob  
14 1 3 -1.050000 1.606455513 6.135450680 10.366131378 0 0 0 # ob  
15 1 3 -1.050000 5.023189092 2.594160300 6.099420289 0 0 0 # ob  
16 1 3 -1.050000 1.607035345 2.777048519 10.365922068 0 0 0 # ob  
17 1 3 -1.050000 2.741532736 7.058553874 12.564346262 0 0 0 # ob  
18 1 3 -1.050000 4.195385345 7.231598519 10.365922068 0 0 0 # ob  
19 1 3 -1.050000 0.153182736 2.604003874 12.564346262 0 0 0 # ob  
20 1 3 -1.050000 2.741860908 1.860389700 12.565579711 0 0 0 # ob  
21 1 4 -0.950000 1.999257657 0.000940996 10.345082885 0 0 0 # oho  
22 1 5 -0.950000 4.667081651 0.003976970 12.393982417 0 0 0 # oht  
23 1 6 -0.950000 4.587607657 4.455490996 10.345082885 0 0 0 # oh  
24 1 3 -1.050000 2.078731651 4.458526970 12.393982417 0 0 0 # ob  
25 1 6 -0.950000 3.177442343 8.908159004 8.319917115 0 0 0 # oh  
26 1 3 -1.050000 0.509618349 8.905123030 6.271017583 0 0 0 # ob  
27 1 6 -0.950000 0.589092343 4.453609004 8.319917115 0 0 0 # oh  
28 1 3 -1.050000 3.097968349 4.450573030 6.271017583 0 0 0 # ob  
29 1 3 -1.050000 4.194805513 1.680900680 10.366131378 0 0 0 # ob

|     |   |   |           |             |               |              |   |   |   |   |    |
|-----|---|---|-----------|-------------|---------------|--------------|---|---|---|---|----|
| 30  | 1 | 3 | -1.050000 | 0.153510908 | 6.314939700   | 12.565579711 | 0 | 0 | 0 | # | ob |
| 31  | 1 | 3 | -1.050000 | 3.569664655 | 6.132051481   | 8.299077932  | 0 | 0 | 0 | # | ob |
| 32  | 1 | 3 | -1.050000 | 2.435167264 | 1.850546126   | 6.100653738  | 0 | 0 | 0 | # | ob |
| 33  | 1 | 7 | 2.100000  | 4.222997014 | 1.527119204   | 11.995277170 | 0 | 0 | 0 | # | st |
| 34  | 1 | 7 | 2.100000  | 3.542027774 | 5.973370782   | 6.670701903  | 0 | 0 | 0 | # | st |
| 35  | 1 | 7 | 2.100000  | 0.953702986 | 7.381980796   | 6.669722830  | 0 | 0 | 0 | # | st |
| 36  | 1 | 7 | 2.100000  | 3.542052986 | 2.927430796   | 6.669722830  | 0 | 0 | 0 | # | st |
| 37  | 1 | 7 | 2.100000  | 4.223022226 | 7.390279218   | 11.994298097 | 0 | 0 | 0 | # | st |
| 38  | 1 | 7 | 2.100000  | 1.634672226 | 2.935729218   | 11.994298097 | 0 | 0 | 0 | # | st |
| 39  | 1 | 7 | 2.100000  | 1.634647014 | 5.981669204   | 11.995277170 | 0 | 0 | 0 | # | st |
| 40  | 1 | 7 | 2.100000  | 0.953677774 | 1.518820782   | 6.670701903  | 0 | 0 | 0 | # | st |
| 41  | 1 | 1 | 1.575000  | 2.588555029 | 10.383761568  | 9.332770632  | 0 | 0 | 0 | # | ao |
| 42  | 1 | 1 | 1.575000  | 0.000205029 | 14.838311568  | 9.332770632  | 0 | 0 | 0 | # | ao |
| 43  | 1 | 1 | 1.575000  | 2.588144971 | 16.343538432  | 9.332229368  | 0 | 0 | 0 | # | ao |
| 44  | 1 | 1 | 1.575000  | 5.176494971 | 11.888988432  | 9.332229368  | 0 | 0 | 0 | # | ao |
| 45  | 1 | 2 | 0.425000  | 3.734650872 | 13.366367322  | 10.818615063 | 0 | 0 | 0 | # | ho |
| 46  | 1 | 2 | 0.425000  | 1.146300872 | 8.911817322   | 10.818615063 | 0 | 0 | 0 | # | ho |
| 47  | 1 | 2 | 0.425000  | 1.442049128 | 13.360932678  | 7.846384937  | 0 | 0 | 0 | # | ho |
| 48  | 1 | 2 | 0.425000  | 4.030399128 | 17.815482678  | 7.846384937  | 0 | 0 | 0 | # | ho |
| 49  | 1 | 3 | -1.050000 | 0.981314655 | 10.586601481  | 8.299077932  | 0 | 0 | 0 | # | ob |
| 50  | 1 | 3 | -1.050000 | 5.023517264 | 15.214196126  | 6.100653738  | 0 | 0 | 0 | # | ob |
| 51  | 1 | 3 | -1.050000 | 3.570244487 | 11.682749320  | 8.298868622  | 0 | 0 | 0 | # | ob |
| 52  | 1 | 3 | -1.050000 | 2.434839092 | 15.957810300  | 6.099420289  | 0 | 0 | 0 | # | ob |
| 53  | 1 | 3 | -1.050000 | 0.981894487 | 16.137299320  | 8.298868622  | 0 | 0 | 0 | # | ob |
| 54  | 1 | 3 | -1.050000 | 1.606455513 | 15.044550680  | 10.366131378 | 0 | 0 | 0 | # | ob |
| 55  | 1 | 3 | -1.050000 | 5.023189092 | 11.503260300  | 6.099420289  | 0 | 0 | 0 | # | ob |
| 56  | 1 | 3 | -1.050000 | 1.607035345 | 11.686148519  | 10.365922068 | 0 | 0 | 0 | # | ob |
| 57  | 1 | 3 | -1.050000 | 2.741532736 | 15.967653874  | 12.564346262 | 0 | 0 | 0 | # | ob |
| 58  | 1 | 3 | -1.050000 | 4.195385345 | 16.140698519  | 10.365922068 | 0 | 0 | 0 | # | ob |
| 59  | 1 | 3 | -1.050000 | 0.153182736 | 11.513103874  | 12.564346262 | 0 | 0 | 0 | # | ob |
| 60  | 1 | 3 | -1.050000 | 2.741860908 | 10.769489700  | 12.565579711 | 0 | 0 | 0 | # | ob |
| 61  | 1 | 6 | -0.950000 | 1.999257657 | 8.910040996   | 10.345082885 | 0 | 0 | 0 | # | oh |
| 62  | 1 | 3 | -1.050000 | 4.667081651 | 8.913076970   | 12.393982417 | 0 | 0 | 0 | # | ob |
| 63  | 1 | 6 | -0.950000 | 4.587607657 | 13.364590996  | 10.345082885 | 0 | 0 | 0 | # | oh |
| 64  | 1 | 3 | -1.050000 | 2.078731651 | 13.367626970  | 12.393982417 | 0 | 0 | 0 | # | ob |
| 65  | 1 | 6 | -0.950000 | 3.177442343 | 17.817259004  | 8.319917115  | 0 | 0 | 0 | # | oh |
| 66  | 1 | 3 | -1.050000 | 0.509618349 | 17.814223030  | 6.271017583  | 0 | 0 | 0 | # | ob |
| 67  | 1 | 6 | -0.950000 | 0.589092343 | 13.362709004  | 8.319917115  | 0 | 0 | 0 | # | oh |
| 68  | 1 | 3 | -1.050000 | 3.097968349 | 13.359673030  | 6.271017583  | 0 | 0 | 0 | # | ob |
| 69  | 1 | 3 | -1.050000 | 4.194805513 | 10.590000680  | 10.366131378 | 0 | 0 | 0 | # | ob |
| 70  | 1 | 3 | -1.050000 | 0.153510908 | 15.224039700  | 12.565579711 | 0 | 0 | 0 | # | ob |
| 71  | 1 | 3 | -1.050000 | 3.569664655 | 15.041151481  | 8.299077932  | 0 | 0 | 0 | # | ob |
| 72  | 1 | 3 | -1.050000 | 2.435167264 | 10.759646126  | 6.100653738  | 0 | 0 | 0 | # | ob |
| 73  | 1 | 7 | 2.100000  | 4.222997014 | 10.436219204  | 11.995277170 | 0 | 0 | 0 | # | st |
| 74  | 1 | 7 | 2.100000  | 3.542027774 | 14.882470782  | 6.670701903  | 0 | 0 | 0 | # | st |
| 75  | 1 | 7 | 2.100000  | 0.953702986 | 16.291080796  | 6.669722830  | 0 | 0 | 0 | # | st |
| 76  | 1 | 7 | 2.100000  | 3.542052986 | 11.836530796  | 6.669722830  | 0 | 0 | 0 | # | st |
| 77  | 1 | 7 | 2.100000  | 4.223022226 | 16.299379218  | 11.994298097 | 0 | 0 | 0 | # | st |
| 78  | 1 | 7 | 2.100000  | 1.634672226 | 11.844829218  | 11.994298097 | 0 | 0 | 0 | # | st |
| 79  | 1 | 7 | 2.100000  | 1.634647014 | 14.890769204  | 11.995277170 | 0 | 0 | 0 | # | st |
| 80  | 1 | 7 | 2.100000  | 0.953677774 | 10.427920782  | 6.670701903  | 0 | 0 | 0 | # | st |
| 81  | 1 | 1 | 1.575000  | 2.588555029 | 19.292861568  | 9.332770632  | 0 | 0 | 0 | # | ao |
| 82  | 1 | 1 | 1.575000  | 0.000205029 | 23.747411568  | 9.332770632  | 0 | 0 | 0 | # | ao |
| 83  | 1 | 1 | 1.575000  | 2.588144971 | 25.252638432  | 9.332229368  | 0 | 0 | 0 | # | ao |
| 84  | 1 | 1 | 1.575000  | 5.176494971 | 20.798088432  | 9.332229368  | 0 | 0 | 0 | # | ao |
| 85  | 1 | 2 | 0.425000  | 3.734650872 | 22.275467322  | 10.818615063 | 0 | 0 | 0 | # | ho |
| 86  | 1 | 2 | 0.425000  | 1.146300872 | 17.820917322  | 10.818615063 | 0 | 0 | 0 | # | ho |
| 87  | 1 | 2 | 0.425000  | 1.442049128 | 22.270032678  | 7.846384937  | 0 | 0 | 0 | # | ho |
| 88  | 1 | 2 | 0.425000  | 4.030399128 | 26.724582678  | 7.846384937  | 0 | 0 | 0 | # | ho |
| 89  | 1 | 3 | -1.050000 | 0.981314655 | 19.495701481  | 8.299077932  | 0 | 0 | 0 | # | ob |
| 90  | 1 | 3 | -1.050000 | 5.023517264 | 24.123296126  | 6.100653738  | 0 | 0 | 0 | # | ob |
| 91  | 1 | 3 | -1.050000 | 3.570244487 | 20.591849320  | 8.298868622  | 0 | 0 | 0 | # | ob |
| 92  | 1 | 3 | -1.050000 | 2.434839092 | 24.866910300  | 6.099420289  | 0 | 0 | 0 | # | ob |
| 93  | 1 | 3 | -1.050000 | 0.981894487 | 25.046399320  | 8.298868622  | 0 | 0 | 0 | # | ob |
| 94  | 1 | 3 | -1.050000 | 1.606455513 | 23.953650680  | 10.366131378 | 0 | 0 | 0 | # | ob |
| 95  | 1 | 3 | -1.050000 | 5.023189092 | 20.412360300  | 6.099420289  | 0 | 0 | 0 | # | ob |
| 96  | 1 | 3 | -1.050000 | 1.607035345 | 20.595248519  | 10.365922068 | 0 | 0 | 0 | # | ob |
| 97  | 1 | 3 | -1.050000 | 2.741532736 | 24.876753874  | 12.564346262 | 0 | 0 | 0 | # | ob |
| 98  | 1 | 3 | -1.050000 | 4.195385345 | 25.049798519  | 10.365922068 | 0 | 0 | 0 | # | ob |
| 99  | 1 | 3 | -1.050000 | 0.153182736 | 20.422203874  | 12.564346262 | 0 | 0 | 0 | # | ob |
| 100 | 1 | 3 | -1.050000 | 2.741860908 | 19.678589700  | 12.565579711 | 0 | 0 | 0 | # | ob |
| 101 | 1 | 6 | -0.950000 | 1.999257657 | 17.819140996  | 10.345082885 | 0 | 0 | 0 | # | oh |
| 102 | 1 | 3 | -1.050000 | 4.667081651 | 17.822176970  | 12.393982417 | 0 | 0 | 0 | # | ob |
| 103 | 1 | 6 | -0.950000 | 4.587607657 | 22.273690996  | 10.345082885 | 0 | 0 | 0 | # | oh |
| 104 | 1 | 3 | -1.050000 | 2.078731651 | 22.276726970  | 12.393982417 | 0 | 0 | 0 | # | ob |
| 105 | 1 | 6 | -0.950000 | 3.177442343 | 26.726359004  | 8.319917115  | 0 | 0 | 0 | # | oh |
| 106 | 1 | 3 | -1.050000 | 0.509618349 | 26.723323030  | 6.271017583  | 0 | 0 | 0 | # | ob |
| 107 | 1 | 6 | -0.950000 | 0.589092343 | 22.271809004  | 8.319917115  | 0 | 0 | 0 | # | oh |
| 108 | 1 | 3 | -1.050000 | 3.097968349 | 22.268773030  | 6.271017583  | 0 | 0 | 0 | # | ob |
| 109 | 1 | 3 | -1.050000 | 4.194805513 | 19.499100680  | 10.366131378 | 0 | 0 | 0 | # | ob |
| 110 | 1 | 3 | -1.050000 | 0.153510908 | 24.133139700  | 12.565579711 | 0 | 0 | 0 | # | ob |
| 111 | 1 | 3 | -1.050000 | 3.569664655 | 23.950251481  | 8.299077932  | 0 | 0 | 0 | # | ob |
| 112 | 1 | 3 | -1.050000 | 2.435167264 | 19.668746126  | 6.100653738  | 0 | 0 | 0 | # | ob |
| 113 | 1 | 7 | 2.100000  | 4.222997014 | 19.345319204  | 11.995277170 | 0 | 0 | 0 | # | st |
| 114 | 1 | 7 | 2.100000  | 3.542027774 | 23.791570782  | 6.670701903  | 0 | 0 | 0 | # | st |
| 115 | 1 | 7 | 2.100000  | 0.953702986 | 25.200180796  | 6.669722830  | 0 | 0 | 0 | # | st |
| 116 | 1 | 7 | 2.100000  | 3.542052986 | 20.745630796  | 6.669722830  | 0 | 0 | 0 | # | st |
| 117 | 1 | 7 | 2.100000  | 4.223022226 | 25.208479218  | 11.994298097 | 0 | 0 | 0 | # | st |
| 118 | 1 | 7 | 2.100000  | 1.634672226 | 20.753929218  | 11.994298097 | 0 | 0 | 0 | # | st |
| 119 | 1 | 7 | 2.100000  | 1.634647014 | 23.799869204  | 11.995277170 | 0 | 0 | 0 | # | st |
| 120 | 1 | 7 | 2.100000  | 0.953677774 | 19.337020782  | 6.670701903  | 0 | 0 | 0 | # | st |
| 121 | 1 | 1 | 1.575000  | 2.588555029 | -27.434438432 | 9.332770632  | 0 | 1 | 0 | # | ao |
| 122 | 1 | 1 | 1.575000  | 0.000205029 | -22.979888432 | 9.332770632  | 0 | 1 | 0 | # | ao |



|     |   |   |           |              |               |               |   |   |   |   |     |
|-----|---|---|-----------|--------------|---------------|---------------|---|---|---|---|-----|
| 123 | 1 | 1 | 1.575000  | 2.588144971  | -21.474661568 | 9.332229368   | 0 | 1 | 0 | # | ao  |
| 124 | 1 | 1 | 1.575000  | 5.176494971  | -25.929211568 | 9.332229368   | 0 | 1 | 0 | # | ao  |
| 125 | 1 | 2 | 0.425000  | 3.734650872  | -24.451832678 | 10.818615063  | 0 | 1 | 0 | # | ho  |
| 126 | 1 | 2 | 0.425000  | 1.146300872  | 26.730017322  | 10.818615063  | 0 | 0 | 0 | # | ho  |
| 127 | 1 | 2 | 0.425000  | 1.442049128  | -24.457267322 | 7.846384937   | 0 | 1 | 0 | # | ho  |
| 128 | 1 | 2 | 0.425000  | 4.030399128  | -20.002717322 | 7.846384937   | 0 | 1 | 0 | # | ho  |
| 129 | 1 | 3 | -1.050000 | 0.981314655  | -27.231598519 | 8.299077932   | 0 | 1 | 0 | # | ob  |
| 130 | 1 | 3 | -1.050000 | 5.023517264  | -22.604003874 | 6.100653738   | 0 | 1 | 0 | # | ob  |
| 131 | 1 | 3 | -1.050000 | 3.570244487  | -26.135450680 | 8.298868622   | 0 | 1 | 0 | # | ob  |
| 132 | 1 | 3 | -1.050000 | 2.434839092  | -21.860389700 | 6.099420289   | 0 | 1 | 0 | # | ob  |
| 133 | 1 | 3 | -1.050000 | 0.981894487  | -21.680900680 | 8.298868622   | 0 | 1 | 0 | # | ob  |
| 134 | 1 | 3 | -1.050000 | 1.606455513  | -22.773649320 | 10.366131378  | 0 | 1 | 0 | # | ob  |
| 135 | 1 | 3 | -1.050000 | 5.023189092  | -26.314939700 | 6.099420289   | 0 | 1 | 0 | # | ob  |
| 136 | 1 | 3 | -1.050000 | 1.607035345  | -26.132051481 | 10.365922068  | 0 | 1 | 0 | # | ob  |
| 137 | 1 | 3 | -1.050000 | 2.741532736  | -21.850546126 | 12.564346262  | 0 | 1 | 0 | # | ob  |
| 138 | 1 | 3 | -1.050000 | 4.195385345  | -21.677501481 | 10.365922068  | 0 | 1 | 0 | # | ob  |
| 139 | 1 | 3 | -1.050000 | 0.153182736  | -26.305096126 | 12.564346262  | 0 | 1 | 0 | # | ob  |
| 140 | 1 | 3 | -1.050000 | 2.741860908  | -27.048710300 | 12.565579711  | 0 | 1 | 0 | # | ob  |
| 141 | 1 | 6 | -0.950000 | 1.999257657  | 26.728240996  | 10.345082885  | 0 | 0 | 0 | # | oh  |
| 142 | 1 | 3 | -1.050000 | 4.667081651  | 26.731276970  | 12.393982417  | 0 | 0 | 0 | # | ob  |
| 143 | 1 | 6 | -0.950000 | 4.587607657  | -24.453609004 | 10.345082885  | 0 | 1 | 0 | # | oh  |
| 144 | 1 | 3 | -1.050000 | 2.078731651  | -24.450573030 | 12.393982417  | 0 | 1 | 0 | # | ob  |
| 145 | 1 | 4 | -0.950000 | 3.177442343  | -20.000940996 | 8.319917115   | 0 | 1 | 0 | # | oho |
| 146 | 1 | 5 | -0.950000 | 0.509618349  | -20.003976970 | 6.271017583   | 0 | 1 | 0 | # | oht |
| 147 | 1 | 6 | -0.950000 | 0.589092343  | -24.455490996 | 8.319917115   | 0 | 1 | 0 | # | oh  |
| 148 | 1 | 3 | -1.050000 | 3.097968349  | -24.458526970 | 6.271017583   | 0 | 1 | 0 | # | ob  |
| 149 | 1 | 3 | -1.050000 | 4.194805513  | -27.228199320 | 10.366131378  | 0 | 1 | 0 | # | ob  |
| 150 | 1 | 3 | -1.050000 | 0.153510908  | -22.594160300 | 12.565579711  | 0 | 1 | 0 | # | ob  |
| 151 | 1 | 3 | -1.050000 | 3.569664655  | -22.777048519 | 8.299077932   | 0 | 1 | 0 | # | ob  |
| 152 | 1 | 3 | -1.050000 | 2.435167264  | -27.058553874 | 6.100653738   | 0 | 1 | 0 | # | ob  |
| 153 | 1 | 7 | 2.100000  | 4.222997014  | -27.381980796 | 11.995277170  | 0 | 1 | 0 | # | st  |
| 154 | 1 | 7 | 2.100000  | 3.542027774  | -22.935729218 | 6.670701903   | 0 | 1 | 0 | # | st  |
| 155 | 1 | 7 | 2.100000  | 0.953702986  | -21.527119204 | 6.669722830   | 0 | 1 | 0 | # | st  |
| 156 | 1 | 7 | 2.100000  | 3.542052986  | -25.981669204 | 6.669722830   | 0 | 1 | 0 | # | st  |
| 157 | 1 | 7 | 2.100000  | 4.223022226  | -21.518820782 | 11.994298097  | 0 | 1 | 0 | # | st  |
| 158 | 1 | 7 | 2.100000  | 1.634672226  | -25.973370782 | 11.994298097  | 0 | 1 | 0 | # | st  |
| 159 | 1 | 7 | 2.100000  | 1.634647014  | -22.927430796 | 11.995277170  | 0 | 1 | 0 | # | st  |
| 160 | 1 | 7 | 2.100000  | 0.953677774  | -27.390279218 | 6.670701903   | 0 | 1 | 0 | # | st  |
| 161 | 1 | 5 | -0.950000 | 4.737466427  | -19.680858114 | -16.076279050 | 0 | 1 | 1 | # | oht |
| 162 | 1 | 5 | -0.950000 | 0.304938203  | -0.272172439  | 15.863272887  | 0 | 0 | 0 | # | oht |
| 163 | 1 | 2 | 0.425000  | 4.99988619   | -1.054326608  | -15.567929463 | 0 | 0 | 1 | # | ho  |
| 164 | 1 | 2 | 0.425000  | 4.863848964  | -18.596754758 | -16.278386456 | 0 | 1 | 1 | # | ho  |
| 165 | 1 | 2 | 0.425000  | 0.113048915  | -19.012312375 | 15.301136949  | 0 | 1 | 0 | # | ho  |
| 166 | 2 | 1 | 1.575000  | 7.765255029  | 1.474661568   | 9.332770632   | 0 | 0 | 0 | # | ao  |
| 167 | 2 | 1 | 1.575000  | 5.176905029  | 5.929211568   | 9.332770632   | 0 | 0 | 0 | # | ao  |
| 168 | 2 | 1 | 1.575000  | 7.764844971  | 7.434438432   | 9.332229368   | 0 | 0 | 0 | # | ao  |
| 169 | 2 | 1 | 1.575000  | 10.353194971 | 2.979888432   | 9.332229368   | 0 | 0 | 0 | # | ao  |
| 170 | 2 | 2 | 0.425000  | 8.911350872  | 4.457267322   | 10.818615063  | 0 | 0 | 0 | # | ho  |
| 171 | 2 | 2 | 0.425000  | 6.323000872  | 0.002717322   | 10.818615063  | 0 | 0 | 0 | # | ho  |
| 172 | 2 | 2 | 0.425000  | 6.618749128  | 4.451832678   | 7.846384937   | 0 | 0 | 0 | # | ho  |
| 173 | 2 | 2 | 0.425000  | 9.207099128  | 8.906382678   | 7.846384937   | 0 | 0 | 0 | # | ho  |
| 174 | 2 | 3 | -1.050000 | 6.158014655  | 1.677501481   | 8.299077932   | 0 | 0 | 0 | # | ob  |
| 175 | 2 | 3 | -1.050000 | 10.200217264 | 6.305096126   | 6.100653738   | 0 | 0 | 0 | # | ob  |
| 176 | 2 | 3 | -1.050000 | 8.746944487  | 2.773649320   | 8.298868622   | 0 | 0 | 0 | # | ob  |
| 177 | 2 | 3 | -1.050000 | 7.611539092  | 7.048710300   | 6.099420289   | 0 | 0 | 0 | # | ob  |
| 178 | 2 | 3 | -1.050000 | 6.158594487  | 7.228199320   | 8.298868622   | 0 | 0 | 0 | # | ob  |
| 179 | 2 | 3 | -1.050000 | 6.783155513  | 6.135450680   | 10.366131378  | 0 | 0 | 0 | # | ob  |
| 180 | 2 | 3 | -1.050000 | 10.199889092 | 2.594160300   | 6.099420289   | 0 | 0 | 0 | # | ob  |
| 181 | 2 | 3 | -1.050000 | 6.783735345  | 2.777048519   | 10.365922068  | 0 | 0 | 0 | # | ob  |
| 182 | 2 | 3 | -1.050000 | 7.918232736  | 7.058553874   | 12.564346262  | 0 | 0 | 0 | # | ob  |
| 183 | 2 | 3 | -1.050000 | 9.372085345  | 7.231598519   | 10.365922068  | 0 | 0 | 0 | # | ob  |
| 184 | 2 | 3 | -1.050000 | 5.329882736  | 2.604003874   | 12.564346262  | 0 | 0 | 0 | # | ob  |
| 185 | 2 | 3 | -1.050000 | 7.918560908  | 1.860389700   | 12.565579711  | 0 | 0 | 0 | # | ob  |
| 186 | 2 | 4 | -0.950000 | 7.175957657  | 0.000940996   | 10.345082885  | 0 | 0 | 0 | # | oho |
| 187 | 2 | 5 | -0.950000 | 9.843781651  | 0.003976970   | 12.393982417  | 0 | 0 | 0 | # | oht |
| 188 | 2 | 6 | -0.950000 | 9.764307657  | 4.455490996   | 10.345082885  | 0 | 0 | 0 | # | oh  |
| 189 | 2 | 3 | -1.050000 | 7.255431651  | 4.458526970   | 12.393982417  | 0 | 0 | 0 | # | ob  |
| 190 | 2 | 6 | -0.950000 | 8.354142343  | 8.908159004   | 8.319917115   | 0 | 0 | 0 | # | oh  |
| 191 | 2 | 3 | -1.050000 | 5.686318349  | 8.905123030   | 6.271017583   | 0 | 0 | 0 | # | ob  |
| 192 | 2 | 6 | -0.950000 | 5.765792343  | 4.453609004   | 8.319917115   | 0 | 0 | 0 | # | oh  |
| 193 | 2 | 3 | -1.050000 | 8.274668349  | 4.450573030   | 6.271017583   | 0 | 0 | 0 | # | ob  |
| 194 | 2 | 3 | -1.050000 | 9.371505513  | 1.680900680   | 10.366131378  | 0 | 0 | 0 | # | ob  |
| 195 | 2 | 3 | -1.050000 | 5.330210908  | 6.314939700   | 12.565579711  | 0 | 0 | 0 | # | ob  |
| 196 | 2 | 3 | -1.050000 | 8.746364655  | 6.132051481   | 8.299077932   | 0 | 0 | 0 | # | ob  |
| 197 | 2 | 3 | -1.050000 | 7.611867264  | 1.850546126   | 6.100653738   | 0 | 0 | 0 | # | ob  |
| 198 | 2 | 7 | 2.100000  | 9.399697014  | 1.527119204   | 11.995277170  | 0 | 0 | 0 | # | st  |
| 199 | 2 | 7 | 2.100000  | 8.718727774  | 5.973370782   | 6.670701903   | 0 | 0 | 0 | # | st  |
| 200 | 2 | 7 | 2.100000  | 6.130402986  | 7.381980796   | 6.669722830   | 0 | 0 | 0 | # | st  |
| 201 | 2 | 7 | 2.100000  | 8.718752986  | 2.927430796   | 6.669722830   | 0 | 0 | 0 | # | st  |
| 202 | 2 | 7 | 2.100000  | 9.399722226  | 7.390279218   | 11.994298097  | 0 | 0 | 0 | # | st  |
| 203 | 2 | 7 | 2.100000  | 6.811372226  | 2.935729218   | 11.994298097  | 0 | 0 | 0 | # | st  |
| 204 | 2 | 7 | 2.100000  | 6.811347014  | 5.981669204   | 11.995277170  | 0 | 0 | 0 | # | st  |
| 205 | 2 | 7 | 2.100000  | 6.130377774  | 1.518820782   | 6.670701903   | 0 | 0 | 0 | # | st  |
| 206 | 2 | 1 | 1.575000  | 7.765255029  | 10.383761568  | 9.332770632   | 0 | 0 | 0 | # | ao  |
| 207 | 2 | 1 | 1.575000  | 5.176905029  | 14.838311568  | 9.332770632   | 0 | 0 | 0 | # | ao  |
| 208 | 2 | 1 | 1.575000  | 7.764844971  | 16.343538432  | 9.332229368   | 0 | 0 | 0 | # | ao  |
| 209 | 2 | 1 | 1.575000  | 10.353194971 | 11.888988432  | 9.332229368   | 0 | 0 | 0 | # | ao  |
| 210 | 2 | 2 | 0.425000  | 8.911350872  | 13.366367322  | 10.818615063  | 0 | 0 | 0 | # | ho  |
| 211 | 2 | 2 | 0.425000  | 6.323000872  | 8.911817322   | 10.818615063  | 0 | 0 | 0 | # | ho  |
| 212 | 2 | 2 | 0.425000  | 6.618749128  | 13.360932678  | 7.846384937   | 0 | 0 | 0 | # | ho  |
| 213 | 2 | 2 | 0.425000  | 9.207099128  | 17.815482678  | 7.846384937   | 0 | 0 | 0 | # | ho  |
| 214 | 2 | 3 | -1.050000 | 6.158014655  | 10.586601481  | 8.299077932   | 0 | 0 | 0 | # | ob  |
| 215 | 2 | 3 | -1.050000 | 10.200217264 | 15.214196126  | 6.100653738   | 0 | 0 | 0 | # | ob  |

|     |   |   |           |              |               |              |   |   |   |   |    |
|-----|---|---|-----------|--------------|---------------|--------------|---|---|---|---|----|
| 216 | 2 | 3 | -1.050000 | 8.746944487  | 11.682749320  | 8.298868622  | 0 | 0 | 0 | # | ob |
| 217 | 2 | 3 | -1.050000 | 7.611539092  | 15.957810300  | 6.099420289  | 0 | 0 | 0 | # | ob |
| 218 | 2 | 3 | -1.050000 | 6.158594487  | 16.137299320  | 8.298868622  | 0 | 0 | 0 | # | ob |
| 219 | 2 | 3 | -1.050000 | 6.783155513  | 15.044550680  | 10.366131378 | 0 | 0 | 0 | # | ob |
| 220 | 2 | 3 | -1.050000 | 10.199889092 | 11.503260300  | 6.099420289  | 0 | 0 | 0 | # | ob |
| 221 | 2 | 3 | -1.050000 | 6.783735345  | 11.686148519  | 10.365922068 | 0 | 0 | 0 | # | ob |
| 222 | 2 | 3 | -1.050000 | 7.918232736  | 15.967653874  | 12.564346262 | 0 | 0 | 0 | # | ob |
| 223 | 2 | 3 | -1.050000 | 9.372085345  | 16.140698519  | 10.365922068 | 0 | 0 | 0 | # | ob |
| 224 | 2 | 3 | -1.050000 | 5.329882736  | 11.513103874  | 12.564346262 | 0 | 0 | 0 | # | ob |
| 225 | 2 | 3 | -1.050000 | 7.918560908  | 10.769489700  | 12.565579711 | 0 | 0 | 0 | # | ob |
| 226 | 2 | 6 | -0.950000 | 7.175957657  | 8.910040996   | 10.345082885 | 0 | 0 | 0 | # | oh |
| 227 | 2 | 3 | -1.050000 | 9.843781651  | 8.913076970   | 12.393982417 | 0 | 0 | 0 | # | ob |
| 228 | 2 | 6 | -0.950000 | 9.764307657  | 13.364590996  | 10.345082885 | 0 | 0 | 0 | # | oh |
| 229 | 2 | 3 | -1.050000 | 7.255431651  | 13.367626970  | 12.393982417 | 0 | 0 | 0 | # | ob |
| 230 | 2 | 6 | -0.950000 | 8.354142343  | 17.817259004  | 8.319917115  | 0 | 0 | 0 | # | oh |
| 231 | 2 | 3 | -1.050000 | 5.686318349  | 17.814223030  | 6.271017583  | 0 | 0 | 0 | # | ob |
| 232 | 2 | 6 | -0.950000 | 5.765792343  | 13.362709004  | 8.319917115  | 0 | 0 | 0 | # | oh |
| 233 | 2 | 3 | -1.050000 | 8.274668349  | 13.359673030  | 6.271017583  | 0 | 0 | 0 | # | ob |
| 234 | 2 | 3 | -1.050000 | 9.371505513  | 10.590000680  | 10.366131378 | 0 | 0 | 0 | # | ob |
| 235 | 2 | 3 | -1.050000 | 5.330210908  | 15.224039700  | 12.565579711 | 0 | 0 | 0 | # | ob |
| 236 | 2 | 3 | -1.050000 | 8.746364655  | 15.041151481  | 8.299077932  | 0 | 0 | 0 | # | ob |
| 237 | 2 | 3 | -1.050000 | 7.611867264  | 10.759646126  | 6.100653738  | 0 | 0 | 0 | # | ob |
| 238 | 2 | 7 | 2.100000  | 9.399697014  | 10.436219204  | 11.995277170 | 0 | 0 | 0 | # | st |
| 239 | 2 | 7 | 2.100000  | 8.718727774  | 14.882470782  | 6.670701903  | 0 | 0 | 0 | # | st |
| 240 | 2 | 7 | 2.100000  | 6.130402986  | 16.291080796  | 6.669722830  | 0 | 0 | 0 | # | st |
| 241 | 2 | 7 | 2.100000  | 8.718752986  | 11.836530796  | 6.669722830  | 0 | 0 | 0 | # | st |
| 242 | 2 | 7 | 2.100000  | 9.399722226  | 16.299379218  | 11.994298097 | 0 | 0 | 0 | # | st |
| 243 | 2 | 7 | 2.100000  | 6.811372226  | 11.844829218  | 11.994298097 | 0 | 0 | 0 | # | st |
| 244 | 2 | 7 | 2.100000  | 6.811347014  | 14.890769204  | 11.995277170 | 0 | 0 | 0 | # | st |
| 245 | 2 | 7 | 2.100000  | 6.130377774  | 10.427920782  | 6.670701903  | 0 | 0 | 0 | # | st |
| 246 | 2 | 1 | 1.575000  | 7.765255029  | 19.292861568  | 9.332770632  | 0 | 0 | 0 | # | ao |
| 247 | 2 | 1 | 1.575000  | 5.176905029  | 23.747411568  | 9.332770632  | 0 | 0 | 0 | # | ao |
| 248 | 2 | 1 | 1.575000  | 7.764844971  | 25.252638432  | 9.332229368  | 0 | 0 | 0 | # | ao |
| 249 | 2 | 1 | 1.575000  | 10.353194971 | 20.798088432  | 9.332229368  | 0 | 0 | 0 | # | ao |
| 250 | 2 | 2 | 0.425000  | 8.911350872  | 22.275467322  | 10.818615063 | 0 | 0 | 0 | # | ho |
| 251 | 2 | 2 | 0.425000  | 6.323000872  | 17.820917322  | 10.818615063 | 0 | 0 | 0 | # | ho |
| 252 | 2 | 2 | 0.425000  | 6.618749128  | 22.270032678  | 7.846384937  | 0 | 0 | 0 | # | ho |
| 253 | 2 | 2 | 0.425000  | 9.207099128  | 26.724582678  | 7.846384937  | 0 | 0 | 0 | # | ho |
| 254 | 2 | 3 | -1.050000 | 6.158014655  | 19.495701481  | 8.299077932  | 0 | 0 | 0 | # | ob |
| 255 | 2 | 3 | -1.050000 | 10.200217264 | 24.123296126  | 6.100653738  | 0 | 0 | 0 | # | ob |
| 256 | 2 | 3 | -1.050000 | 8.746944487  | 20.591849320  | 8.298868622  | 0 | 0 | 0 | # | ob |
| 257 | 2 | 3 | -1.050000 | 7.611539092  | 24.866910300  | 6.099420289  | 0 | 0 | 0 | # | ob |
| 258 | 2 | 3 | -1.050000 | 6.158594487  | 25.046399320  | 8.298868622  | 0 | 0 | 0 | # | ob |
| 259 | 2 | 3 | -1.050000 | 6.783155513  | 23.953650680  | 10.366131378 | 0 | 0 | 0 | # | ob |
| 260 | 2 | 3 | -1.050000 | 10.199889092 | 20.412360300  | 6.099420289  | 0 | 0 | 0 | # | ob |
| 261 | 2 | 3 | -1.050000 | 6.783735345  | 20.595248519  | 10.365922068 | 0 | 0 | 0 | # | ob |
| 262 | 2 | 3 | -1.050000 | 7.918232736  | 24.876753874  | 12.564346262 | 0 | 0 | 0 | # | ob |
| 263 | 2 | 3 | -1.050000 | 9.372085345  | 25.049798519  | 10.365922068 | 0 | 0 | 0 | # | ob |
| 264 | 2 | 3 | -1.050000 | 5.329882736  | 20.422203874  | 12.564346262 | 0 | 0 | 0 | # | ob |
| 265 | 2 | 3 | -1.050000 | 7.918560908  | 19.678589700  | 12.565579711 | 0 | 0 | 0 | # | ob |
| 266 | 2 | 6 | -0.950000 | 7.175957657  | 17.819140996  | 10.345082885 | 0 | 0 | 0 | # | oh |
| 267 | 2 | 3 | -1.050000 | 9.843781651  | 17.822176970  | 12.393982417 | 0 | 0 | 0 | # | ob |
| 268 | 2 | 6 | -0.950000 | 9.764307657  | 22.273690996  | 10.345082885 | 0 | 0 | 0 | # | oh |
| 269 | 2 | 3 | -1.050000 | 7.255431651  | 22.276726970  | 12.393982417 | 0 | 0 | 0 | # | ob |
| 270 | 2 | 6 | -0.950000 | 8.354142343  | 26.726359004  | 8.319917115  | 0 | 0 | 0 | # | oh |
| 271 | 2 | 3 | -1.050000 | 5.686318349  | 26.723323030  | 6.271017583  | 0 | 0 | 0 | # | ob |
| 272 | 2 | 6 | -0.950000 | 5.765792343  | 22.271809004  | 8.319917115  | 0 | 0 | 0 | # | oh |
| 273 | 2 | 3 | -1.050000 | 8.274668349  | 22.268773030  | 6.271017583  | 0 | 0 | 0 | # | ob |
| 274 | 2 | 3 | -1.050000 | 9.371505513  | 19.499100680  | 10.366131378 | 0 | 0 | 0 | # | ob |
| 275 | 2 | 3 | -1.050000 | 5.330210908  | 24.133139700  | 12.565579711 | 0 | 0 | 0 | # | ob |
| 276 | 2 | 3 | -1.050000 | 8.746364655  | 23.950251481  | 8.299077932  | 0 | 0 | 0 | # | ob |
| 277 | 2 | 3 | -1.050000 | 7.611867264  | 19.668746126  | 6.100653738  | 0 | 0 | 0 | # | ob |
| 278 | 2 | 7 | 2.100000  | 9.399697014  | 19.345319204  | 11.995277170 | 0 | 0 | 0 | # | st |
| 279 | 2 | 7 | 2.100000  | 8.718727774  | 23.791570782  | 6.670701903  | 0 | 0 | 0 | # | st |
| 280 | 2 | 7 | 2.100000  | 6.130402986  | 25.200180796  | 6.669722830  | 0 | 0 | 0 | # | st |
| 281 | 2 | 7 | 2.100000  | 8.718752986  | 20.745630796  | 6.669722830  | 0 | 0 | 0 | # | st |
| 282 | 2 | 7 | 2.100000  | 9.399722226  | 25.208479218  | 11.994298097 | 0 | 0 | 0 | # | st |
| 283 | 2 | 7 | 2.100000  | 6.811372226  | 20.753929218  | 11.994298097 | 0 | 0 | 0 | # | st |
| 284 | 2 | 7 | 2.100000  | 6.811347014  | 23.799869204  | 11.995277170 | 0 | 0 | 0 | # | st |
| 285 | 2 | 7 | 2.100000  | 6.130377774  | 19.337020782  | 6.670701903  | 0 | 0 | 0 | # | st |
| 286 | 2 | 1 | 1.575000  | 7.765255029  | -27.434438432 | 9.332770632  | 0 | 1 | 0 | # | ao |
| 287 | 2 | 1 | 1.575000  | 5.176905029  | -22.979888432 | 9.332770632  | 0 | 1 | 0 | # | ao |
| 288 | 2 | 1 | 1.575000  | 7.764844971  | -21.474661568 | 9.332229368  | 0 | 1 | 0 | # | ao |
| 289 | 2 | 1 | 1.575000  | 10.353194971 | -25.929211568 | 9.332229368  | 0 | 1 | 0 | # | ao |
| 290 | 2 | 2 | 0.425000  | 8.911350872  | -24.451832678 | 10.818615063 | 0 | 1 | 0 | # | ho |
| 291 | 2 | 2 | 0.425000  | 6.323000872  | 26.730017322  | 10.818615063 | 0 | 0 | 0 | # | ho |
| 292 | 2 | 2 | 0.425000  | 6.618749128  | -24.457267322 | 7.846384937  | 0 | 1 | 0 | # | ho |
| 293 | 2 | 2 | 0.425000  | 9.207099128  | -20.002717322 | 7.846384937  | 0 | 1 | 0 | # | ho |
| 294 | 2 | 3 | -1.050000 | 6.158014655  | -27.231598519 | 8.299077932  | 0 | 1 | 0 | # | ob |
| 295 | 2 | 3 | -1.050000 | 10.200217264 | -22.604003874 | 6.100653738  | 0 | 1 | 0 | # | ob |
| 296 | 2 | 3 | -1.050000 | 8.746944487  | -26.135450680 | 8.298868622  | 0 | 1 | 0 | # | ob |
| 297 | 2 | 3 | -1.050000 | 7.611539092  | -21.860389700 | 6.099420289  | 0 | 1 | 0 | # | ob |
| 298 | 2 | 3 | -1.050000 | 6.158594487  | -21.680900680 | 8.298868622  | 0 | 1 | 0 | # | ob |
| 299 | 2 | 3 | -1.050000 | 6.783155513  | -22.773649320 | 10.366131378 | 0 | 1 | 0 | # | ob |
| 300 | 2 | 3 | -1.050000 | 10.199889092 | -26.314939700 | 6.099420289  | 0 | 1 | 0 | # | ob |
| 301 | 2 | 3 | -1.050000 | 6.783735345  | -26.132051481 | 10.365922068 | 0 | 1 | 0 | # | ob |
| 302 | 2 | 3 | -1.050000 | 7.918232736  | -21.850546126 | 12.564346262 | 0 | 1 | 0 | # | ob |
| 303 | 2 | 3 | -1.050000 | 9.372085345  | -21.677501481 | 10.365922068 | 0 | 1 | 0 | # | ob |
| 304 | 2 | 3 | -1.050000 | 5.329882736  | -26.305096126 | 12.564346262 | 0 | 1 | 0 | # | ob |
| 305 | 2 | 3 | -1.050000 | 7.918560908  | -27.048710300 | 12.565579711 | 0 | 1 | 0 | # | ob |
| 306 | 2 | 6 | -0.950000 | 7.175957657  | 26.728240996  | 10.345082885 | 0 | 0 | 0 | # | oh |
| 307 | 2 | 3 | -1.050000 | 9.843781651  | 26.731276970  | 12.393982417 | 0 | 0 | 0 | # | ob |
| 308 | 2 | 6 | -0.950000 | 9.764307657  | -24.453609004 | 10.345082885 | 0 | 1 | 0 | # | oh |

|     |   |   |           |              |               |               |   |   |   |   |     |
|-----|---|---|-----------|--------------|---------------|---------------|---|---|---|---|-----|
| 309 | 2 | 3 | -1.050000 | 7.255431651  | -24.450573030 | 12.393982417  | 0 | 1 | 0 | # | ob  |
| 310 | 2 | 4 | -0.950000 | 8.354142343  | -20.000940996 | 8.319917115   | 0 | 1 | 0 | # | oho |
| 311 | 2 | 5 | -0.950000 | 5.686318349  | -20.003976970 | 6.271017583   | 0 | 1 | 0 | # | oht |
| 312 | 2 | 6 | -0.950000 | 5.765792343  | -24.455490996 | 8.319917115   | 0 | 1 | 0 | # | oh  |
| 313 | 2 | 3 | -1.050000 | 8.274668349  | -24.458526970 | 6.271017583   | 0 | 1 | 0 | # | ob  |
| 314 | 2 | 3 | -1.050000 | 9.371505513  | -27.228199320 | 10.366131378  | 0 | 1 | 0 | # | ob  |
| 315 | 2 | 3 | -1.050000 | 5.330210908  | -22.594160300 | 12.565579711  | 0 | 1 | 0 | # | ob  |
| 316 | 2 | 3 | -1.050000 | 8.746364655  | -22.777048519 | 8.299077932   | 0 | 1 | 0 | # | ob  |
| 317 | 2 | 3 | -1.050000 | 7.611867264  | -27.058553874 | 6.100653738   | 0 | 1 | 0 | # | ob  |
| 318 | 2 | 7 | 2.100000  | 9.399697014  | -27.381980796 | 11.995277170  | 0 | 1 | 0 | # | st  |
| 319 | 2 | 7 | 2.100000  | 8.718277774  | -22.935729218 | 6.670701903   | 0 | 1 | 0 | # | st  |
| 320 | 2 | 7 | 2.100000  | 6.130402986  | -21.527119204 | 6.669722830   | 0 | 1 | 0 | # | st  |
| 321 | 2 | 7 | 2.100000  | 8.718752986  | -25.981669204 | 6.669722830   | 0 | 1 | 0 | # | st  |
| 322 | 2 | 7 | 2.100000  | 9.399722226  | -21.518820782 | 11.994298097  | 0 | 1 | 0 | # | st  |
| 323 | 2 | 7 | 2.100000  | 6.811372226  | -25.973370782 | 11.994298097  | 0 | 1 | 0 | # | st  |
| 324 | 2 | 7 | 2.100000  | 6.811347014  | -22.927430796 | 11.995277170  | 0 | 1 | 0 | # | st  |
| 325 | 2 | 7 | 2.100000  | 6.130377774  | -27.390279218 | 6.670701903   | 0 | 1 | 0 | # | st  |
| 326 | 2 | 5 | -0.950000 | 9.914166427  | -19.680858114 | -16.076279050 | 0 | 1 | 1 | # | oht |
| 327 | 2 | 5 | -0.950000 | 5.481638203  | -0.272172439  | 15.863272887  | 0 | 0 | 0 | # | oht |
| 328 | 2 | 2 | 0.425000  | 5.133272253  | -1.308055357  | 15.669139507  | 0 | 0 | 0 | # | ho  |
| 329 | 2 | 2 | 0.425000  | 10.176688619 | -1.054326608  | -15.567929463 | 0 | 0 | 1 | # | ho  |
| 330 | 2 | 2 | 0.425000  | 10.040548964 | -18.596754758 | -16.278386456 | 0 | 1 | 1 | # | ho  |
| 331 | 2 | 2 | 0.425000  | 5.289748915  | -19.012312375 | 15.301136949  | 0 | 1 | 0 | # | ho  |
| 332 | 3 | 1 | 1.575000  | 12.941955029 | 1.474661568   | 9.332770632   | 0 | 0 | 0 | # | ao  |
| 333 | 3 | 1 | 1.575000  | 10.353605029 | 5.929211568   | 9.332770632   | 0 | 0 | 0 | # | ao  |
| 334 | 3 | 1 | 1.575000  | 12.941544971 | 7.434438432   | 9.332229368   | 0 | 0 | 0 | # | ao  |
| 335 | 3 | 1 | 1.575000  | 15.529894971 | 2.979888432   | 9.332229368   | 0 | 0 | 0 | # | ao  |
| 336 | 3 | 2 | 0.425000  | 14.088050872 | 4.457267322   | 10.818615063  | 0 | 0 | 0 | # | ho  |
| 337 | 3 | 2 | 0.425000  | 11.499700872 | 0.002717322   | 10.818615063  | 0 | 0 | 0 | # | ho  |
| 338 | 3 | 2 | 0.425000  | 11.79549128  | 4.451832678   | 7.846384937   | 0 | 0 | 0 | # | ho  |
| 339 | 3 | 2 | 0.425000  | 14.383799128 | 8.906382678   | 7.846384937   | 0 | 0 | 0 | # | ho  |
| 340 | 3 | 3 | -1.050000 | 11.334714655 | 1.677501481   | 8.299077932   | 0 | 0 | 0 | # | ob  |
| 341 | 3 | 3 | -1.050000 | 15.376917264 | 6.305096126   | 6.100653738   | 0 | 0 | 0 | # | ob  |
| 342 | 3 | 3 | -1.050000 | 13.923644487 | 2.773649320   | 8.298868622   | 0 | 0 | 0 | # | ob  |
| 343 | 3 | 3 | -1.050000 | 12.788239092 | 7.048710300   | 6.099420289   | 0 | 0 | 0 | # | ob  |
| 344 | 3 | 3 | -1.050000 | 11.335294487 | 7.228199320   | 8.298868622   | 0 | 0 | 0 | # | ob  |
| 345 | 3 | 3 | -1.050000 | 11.959855513 | 6.135450680   | 10.366131378  | 0 | 0 | 0 | # | ob  |
| 346 | 3 | 3 | -1.050000 | 15.376589092 | 2.594160300   | 6.099420289   | 0 | 0 | 0 | # | ob  |
| 347 | 3 | 3 | -1.050000 | 11.960435345 | 2.777048519   | 10.365922068  | 0 | 0 | 0 | # | ob  |
| 348 | 3 | 3 | -1.050000 | 13.094932736 | 7.058553874   | 12.564346262  | 0 | 0 | 0 | # | ob  |
| 349 | 3 | 3 | -1.050000 | 14.548785345 | 7.231598519   | 10.365922068  | 0 | 0 | 0 | # | ob  |
| 350 | 3 | 3 | -1.050000 | 10.506582736 | 2.604003874   | 12.564346262  | 0 | 0 | 0 | # | ob  |
| 351 | 3 | 3 | -1.050000 | 13.095260908 | 1.860389700   | 12.565579711  | 0 | 0 | 0 | # | ob  |
| 352 | 3 | 4 | -0.950000 | 12.352657657 | 0.000940996   | 10.345082885  | 0 | 0 | 0 | # | oho |
| 353 | 3 | 5 | -0.950000 | 15.020481651 | 0.003976970   | 12.393982417  | 0 | 0 | 0 | # | oht |
| 354 | 3 | 6 | -0.950000 | 14.941007657 | 4.455490996   | 10.345082885  | 0 | 0 | 0 | # | oh  |
| 355 | 3 | 3 | -1.050000 | 12.432131651 | 4.458526970   | 12.393982417  | 0 | 0 | 0 | # | ob  |
| 356 | 3 | 6 | -0.950000 | 13.530842343 | 8.908159004   | 8.319917115   | 0 | 0 | 0 | # | oh  |
| 357 | 3 | 3 | -1.050000 | 10.863018349 | 8.905123030   | 6.271017583   | 0 | 0 | 0 | # | ob  |
| 358 | 3 | 6 | -0.950000 | 10.942492343 | 4.453609004   | 8.319917115   | 0 | 0 | 0 | # | oh  |
| 359 | 3 | 3 | -1.050000 | 13.451368349 | 4.450573030   | 6.271017583   | 0 | 0 | 0 | # | ob  |
| 360 | 3 | 3 | -1.050000 | 14.548205513 | 1.680900680   | 10.366131378  | 0 | 0 | 0 | # | ob  |
| 361 | 3 | 3 | -1.050000 | 10.506910908 | 6.314939700   | 12.565579711  | 0 | 0 | 0 | # | ob  |
| 362 | 3 | 3 | -1.050000 | 13.923064655 | 6.132051481   | 8.299077932   | 0 | 0 | 0 | # | ob  |
| 363 | 3 | 3 | -1.050000 | 12.788567264 | 1.850546126   | 6.100653738   | 0 | 0 | 0 | # | ob  |
| 364 | 3 | 7 | 2.100000  | 14.576397014 | 1.527119204   | 11.995277170  | 0 | 0 | 0 | # | st  |
| 365 | 3 | 7 | 2.100000  | 13.895427774 | 5.973370782   | 6.670701903   | 0 | 0 | 0 | # | st  |
| 366 | 3 | 7 | 2.100000  | 11.307102986 | 7.381980796   | 6.669722830   | 0 | 0 | 0 | # | st  |
| 367 | 3 | 7 | 2.100000  | 13.895452986 | 2.927430796   | 6.669722830   | 0 | 0 | 0 | # | st  |
| 368 | 3 | 7 | 2.100000  | 14.576422226 | 7.390279218   | 11.994298097  | 0 | 0 | 0 | # | st  |
| 369 | 3 | 7 | 2.100000  | 11.988072226 | 2.935729218   | 11.994298097  | 0 | 0 | 0 | # | st  |
| 370 | 3 | 7 | 2.100000  | 11.988047014 | 5.981669204   | 11.995277170  | 0 | 0 | 0 | # | st  |
| 371 | 3 | 7 | 2.100000  | 11.307077774 | 1.518820782   | 6.670701903   | 0 | 0 | 0 | # | st  |
| 372 | 3 | 1 | 1.575000  | 12.941955029 | 10.383761568  | 9.332770632   | 0 | 0 | 0 | # | ao  |
| 373 | 3 | 1 | 1.575000  | 10.353605029 | 14.838311568  | 9.332770632   | 0 | 0 | 0 | # | ao  |
| 374 | 3 | 1 | 1.575000  | 12.941544971 | 16.343538432  | 9.332229368   | 0 | 0 | 0 | # | ao  |
| 375 | 3 | 1 | 1.575000  | 15.529894971 | 11.888988432  | 9.332229368   | 0 | 0 | 0 | # | ao  |
| 376 | 3 | 2 | 0.425000  | 14.088050872 | 13.366367322  | 10.818615063  | 0 | 0 | 0 | # | ho  |
| 377 | 3 | 2 | 0.425000  | 11.499700872 | 8.911817322   | 10.818615063  | 0 | 0 | 0 | # | ho  |
| 378 | 3 | 2 | 0.425000  | 11.79549128  | 13.360932678  | 7.846384937   | 0 | 0 | 0 | # | ho  |
| 379 | 3 | 2 | 0.425000  | 14.383799128 | 17.815482678  | 7.846384937   | 0 | 0 | 0 | # | ho  |
| 380 | 3 | 3 | -1.050000 | 11.334714655 | 10.586601481  | 8.299077932   | 0 | 0 | 0 | # | ob  |
| 381 | 3 | 3 | -1.050000 | 15.376917264 | 15.214196126  | 6.100653738   | 0 | 0 | 0 | # | ob  |
| 382 | 3 | 3 | -1.050000 | 13.923644487 | 11.682749320  | 8.298868622   | 0 | 0 | 0 | # | ob  |
| 383 | 3 | 3 | -1.050000 | 12.788239092 | 15.957810300  | 6.099420289   | 0 | 0 | 0 | # | ob  |
| 384 | 3 | 3 | -1.050000 | 11.335294487 | 16.137299320  | 8.298868622   | 0 | 0 | 0 | # | ob  |
| 385 | 3 | 3 | -1.050000 | 11.959855513 | 15.044550680  | 10.366131378  | 0 | 0 | 0 | # | ob  |
| 386 | 3 | 3 | -1.050000 | 15.376589092 | 11.503260300  | 6.099420289   | 0 | 0 | 0 | # | ob  |
| 387 | 3 | 3 | -1.050000 | 11.960435345 | 11.686148519  | 10.365922068  | 0 | 0 | 0 | # | ob  |
| 388 | 3 | 3 | -1.050000 | 13.094932736 | 15.967653874  | 12.564346262  | 0 | 0 | 0 | # | ob  |
| 389 | 3 | 3 | -1.050000 | 14.548785345 | 16.140698519  | 10.365922068  | 0 | 0 | 0 | # | ob  |
| 390 | 3 | 3 | -1.050000 | 10.506582736 | 11.513103874  | 12.564346262  | 0 | 0 | 0 | # | ob  |
| 391 | 3 | 3 | -1.050000 | 13.095260908 | 10.769489700  | 12.565579711  | 0 | 0 | 0 | # | ob  |
| 392 | 3 | 6 | -0.950000 | 12.352657657 | 8.910040996   | 10.345082885  | 0 | 0 | 0 | # | oh  |
| 393 | 3 | 3 | -1.050000 | 15.020481651 | 8.913076970   | 12.393982417  | 0 | 0 | 0 | # | ob  |
| 394 | 3 | 6 | -0.950000 | 14.941007657 | 13.364590996  | 10.345082885  | 0 | 0 | 0 | # | oh  |
| 395 | 3 | 3 | -1.050000 | 12.432131651 | 13.367626970  | 12.393982417  | 0 | 0 | 0 | # | ob  |
| 396 | 3 | 6 | -0.950000 | 13.530842343 | 17.817259004  | 8.319917115   | 0 | 0 | 0 | # | oh  |
| 397 | 3 | 3 | -1.050000 | 10.863018349 | 17.814223030  | 6.271017583   | 0 | 0 | 0 | # | ob  |
| 398 | 3 | 6 | -0.950000 | 10.942492343 | 13.362709004  | 8.319917115   | 0 | 0 | 0 | # | oh  |
| 399 | 3 | 3 | -1.050000 | 13.451368349 | 13.359673030  | 6.271017583   | 0 | 0 | 0 | # | ob  |
| 400 | 3 | 3 | -1.050000 | 14.548205513 | 10.590000680  | 10.366131378  | 0 | 0 | 0 | # | ob  |
| 401 | 3 | 3 | -1.050000 | 10.506910908 | 15.224039700  | 12.565579711  | 0 | 0 | 0 | # | ob  |

|     |   |   |           |              |               |               |   |   |   |   |    |
|-----|---|---|-----------|--------------|---------------|---------------|---|---|---|---|----|
| 402 | 3 | 3 | -1.050000 | 13.923064655 | 15.041151481  | 8.299077932   | 0 | 0 | 0 | # | ob |
| 403 | 3 | 3 | -1.050000 | 12.788567264 | 10.759646126  | 6.100653738   | 0 | 0 | 0 | # | ob |
| 404 | 3 | 7 | 2.100000  | 14.576397014 | 10.436219204  | 11.995277170  | 0 | 0 | 0 | # | st |
| 405 | 3 | 7 | 2.100000  | 13.895427774 | 14.882470782  | 6.670701903   | 0 | 0 | 0 | # | st |
| 406 | 3 | 7 | 2.100000  | 11.307102986 | 16.291080796  | 6.669722830   | 0 | 0 | 0 | # | st |
| 407 | 3 | 7 | 2.100000  | 13.895452986 | 11.836530796  | 6.669722830   | 0 | 0 | 0 | # | st |
| 408 | 3 | 7 | 2.100000  | 14.576422226 | 16.299379218  | 11.994298097  | 0 | 0 | 0 | # | st |
| 409 | 3 | 7 | 2.100000  | 11.988072226 | 11.844829218  | 11.994298097  | 0 | 0 | 0 | # | st |
| 410 | 3 | 7 | 2.100000  | 11.988047014 | 14.890769204  | 11.995277170  | 0 | 0 | 0 | # | st |
| 411 | 3 | 7 | 2.100000  | 11.307077774 | 10.427920782  | 6.670701903   | 0 | 0 | 0 | # | st |
| 412 | 3 | 1 | 1.575000  | 12.941955029 | 19.292861568  | 9.332770632   | 0 | 0 | 0 | # | ao |
| 413 | 3 | 1 | 1.575000  | 10.353605029 | 23.747411568  | 9.332770632   | 0 | 0 | 0 | # | ao |
| 414 | 3 | 1 | 1.575000  | 12.941544971 | 25.252638432  | 9.332229368   | 0 | 0 | 0 | # | ao |
| 415 | 3 | 1 | 1.575000  | 15.529894971 | 20.798088432  | 9.332229368   | 0 | 0 | 0 | # | ao |
| 416 | 3 | 2 | 0.425000  | 14.088050872 | 22.275467322  | 10.818615063  | 0 | 0 | 0 | # | ho |
| 417 | 3 | 2 | 0.425000  | 11.499700872 | 17.820917322  | 10.818615063  | 0 | 0 | 0 | # | ho |
| 418 | 3 | 2 | 0.425000  | 11.795449128 | 22.270032678  | 7.846384937   | 0 | 0 | 0 | # | ho |
| 419 | 3 | 2 | 0.425000  | 14.383799128 | 26.724582678  | 7.846384937   | 0 | 0 | 0 | # | ho |
| 420 | 3 | 3 | -1.050000 | 11.334714655 | 19.495701481  | 8.299077932   | 0 | 0 | 0 | # | ob |
| 421 | 3 | 3 | -1.050000 | 15.376917264 | 24.123296126  | 6.100653738   | 0 | 0 | 0 | # | ob |
| 422 | 3 | 3 | -1.050000 | 13.923644487 | 20.591849320  | 8.298868622   | 0 | 0 | 0 | # | ob |
| 423 | 3 | 3 | -1.050000 | 12.788239092 | 24.866910300  | 6.099420289   | 0 | 0 | 0 | # | ob |
| 424 | 3 | 3 | -1.050000 | 11.335294487 | 25.046399320  | 8.298868622   | 0 | 0 | 0 | # | ob |
| 425 | 3 | 3 | -1.050000 | 11.959855513 | 23.953650680  | 10.366131378  | 0 | 0 | 0 | # | ob |
| 426 | 3 | 3 | -1.050000 | 15.376589092 | 20.412360300  | 6.099420289   | 0 | 0 | 0 | # | ob |
| 427 | 3 | 3 | -1.050000 | 11.960435345 | 20.595248519  | 10.365922068  | 0 | 0 | 0 | # | ob |
| 428 | 3 | 3 | -1.050000 | 13.094932736 | 24.876753874  | 12.564346262  | 0 | 0 | 0 | # | ob |
| 429 | 3 | 3 | -1.050000 | 14.548785345 | 25.049798519  | 10.365922068  | 0 | 0 | 0 | # | ob |
| 430 | 3 | 3 | -1.050000 | 10.506582736 | 20.422203874  | 12.564346262  | 0 | 0 | 0 | # | ob |
| 431 | 3 | 3 | -1.050000 | 13.095260908 | 19.678589700  | 12.565579711  | 0 | 0 | 0 | # | ob |
| 432 | 3 | 6 | -0.950000 | 12.352657657 | 17.819140996  | 10.345082885  | 0 | 0 | 0 | # | oh |
| 433 | 3 | 3 | -1.050000 | 15.020481651 | 17.822176970  | 12.393982417  | 0 | 0 | 0 | # | ob |
| 434 | 3 | 6 | -0.950000 | 14.941007657 | 22.273690996  | 10.345082885  | 0 | 0 | 0 | # | oh |
| 435 | 3 | 3 | -1.050000 | 12.432131651 | 22.276726970  | 12.393982417  | 0 | 0 | 0 | # | ob |
| 436 | 3 | 6 | -0.950000 | 13.530842343 | 26.726359004  | 8.319917115   | 0 | 0 | 0 | # | oh |
| 437 | 3 | 3 | -1.050000 | 10.863018349 | 26.723323030  | 6.271017583   | 0 | 0 | 0 | # | ob |
| 438 | 3 | 6 | -0.950000 | 10.942492343 | 22.271809004  | 8.319917115   | 0 | 0 | 0 | # | oh |
| 439 | 3 | 3 | -1.050000 | 13.451368349 | 22.268773030  | 6.271017583   | 0 | 0 | 0 | # | ob |
| 440 | 3 | 3 | -1.050000 | 14.548205513 | 19.499100680  | 10.366131378  | 0 | 0 | 0 | # | ob |
| 441 | 3 | 3 | -1.050000 | 10.506910908 | 24.133139700  | 12.565579711  | 0 | 0 | 0 | # | ob |
| 442 | 3 | 3 | -1.050000 | 13.923064655 | 23.950251481  | 8.299077932   | 0 | 0 | 0 | # | ob |
| 443 | 3 | 3 | -1.050000 | 12.788567264 | 19.668746126  | 6.100653738   | 0 | 0 | 0 | # | ob |
| 444 | 3 | 7 | 2.100000  | 14.576397014 | 19.345319204  | 11.995277170  | 0 | 0 | 0 | # | st |
| 445 | 3 | 7 | 2.100000  | 13.895427774 | 23.791570782  | 6.670701903   | 0 | 0 | 0 | # | st |
| 446 | 3 | 7 | 2.100000  | 11.307102986 | 25.200180796  | 6.669722830   | 0 | 0 | 0 | # | st |
| 447 | 3 | 7 | 2.100000  | 13.895452986 | 20.745630796  | 6.669722830   | 0 | 0 | 0 | # | st |
| 448 | 3 | 7 | 2.100000  | 14.576422226 | 25.208479218  | 11.994298097  | 0 | 0 | 0 | # | st |
| 449 | 3 | 7 | 2.100000  | 11.988072226 | 20.753929218  | 11.994298097  | 0 | 0 | 0 | # | st |
| 450 | 3 | 7 | 2.100000  | 11.988047014 | 23.799869204  | 11.995277170  | 0 | 0 | 0 | # | st |
| 451 | 3 | 7 | 2.100000  | 11.307077774 | 19.337020782  | 6.670701903   | 0 | 0 | 0 | # | st |
| 452 | 3 | 1 | 1.575000  | 12.941955029 | -27.434438432 | 9.332770632   | 0 | 1 | 0 | # | ao |
| 453 | 3 | 1 | 1.575000  | 10.353605029 | -22.979888432 | 9.332770632   | 0 | 1 | 0 | # | ao |
| 454 | 3 | 1 | 1.575000  | 12.941544971 | -21.474661568 | 9.332229368   | 0 | 1 | 0 | # | ao |
| 455 | 3 | 1 | 1.575000  | 15.529894971 | -25.929211568 | 9.332229368   | 0 | 1 | 0 | # | ao |
| 456 | 3 | 2 | 0.425000  | 14.088050872 | -24.451832678 | 10.818615063  | 0 | 1 | 0 | # | ho |
| 457 | 3 | 2 | 0.425000  | 11.499700872 | 26.730017322  | 10.818615063  | 0 | 0 | 0 | # | ho |
| 458 | 3 | 2 | 0.425000  | 11.795449128 | -24.457267322 | 7.846384937   | 0 | 1 | 0 | # | ho |
| 459 | 3 | 2 | 0.425000  | 14.383799128 | -20.002717322 | 7.846384937   | 0 | 1 | 0 | # | ho |
| 460 | 3 | 3 | -1.050000 | 11.334714655 | -27.231598519 | 8.299077932   | 0 | 1 | 0 | # | ob |
| 461 | 3 | 3 | -1.050000 | 15.376917264 | -22.604003874 | 6.100653738   | 0 | 1 | 0 | # | ob |
| 462 | 3 | 3 | -1.050000 | 13.923644487 | -26.135450680 | 8.298868622   | 0 | 1 | 0 | # | ob |
| 463 | 3 | 3 | -1.050000 | 12.788239092 | -21.860389700 | 6.099420289   | 0 | 1 | 0 | # | ob |
| 464 | 3 | 3 | -1.050000 | 11.335294487 | -21.680900680 | 8.298868622   | 0 | 1 | 0 | # | ob |
| 465 | 3 | 3 | -1.050000 | 11.959855513 | -22.773649320 | 10.366131378  | 0 | 1 | 0 | # | ob |
| 466 | 3 | 3 | -1.050000 | 15.376589092 | -26.314939700 | 6.099420289   | 0 | 1 | 0 | # | ob |
| 467 | 3 | 3 | -1.050000 | 11.960435345 | -26.132051481 | 10.365922068  | 0 | 1 | 0 | # | ob |
| 468 | 3 | 3 | -1.050000 | 13.094932736 | -21.850546126 | 12.564346262  | 0 | 1 | 0 | # | ob |
| 469 | 3 | 3 | -1.050000 | 14.548785345 | -21.677501481 | 10.365922068  | 0 | 1 | 0 | # | ob |
| 470 | 3 | 3 | -1.050000 | 10.506582736 | -26.305096126 | 12.564346262  | 0 | 1 | 0 | # | ob |
| 471 | 3 | 3 | -1.050000 | 13.095260908 | -27.048710300 | 12.565579711  | 0 | 1 | 0 | # | ob |
| 472 | 3 | 6 | -0.950000 | 12.352657657 | 26.728240996  | 10.345082885  | 0 | 0 | 0 | # | oh |
| 473 | 3 | 3 | -1.050000 | 15.020481651 | 26.731276970  | 12.393982417  | 0 | 0 | 0 | # | ob |
| 474 | 3 | 6 | -0.950000 | 14.941007657 | -24.453609004 | 10.345082885  | 0 | 1 | 0 | # | oh |
| 475 | 3 | 3 | -1.050000 | 12.432131651 | -24.450573030 | 12.393982417  | 0 | 1 | 0 | # | ob |
| 476 | 3 | 4 | -0.950000 | 13.530842343 | -20.000940996 | 8.319917115   | 0 | 1 | 0 | # | oh |
| 477 | 3 | 5 | -0.950000 | 10.863018349 | -20.003976970 | 6.271017583   | 0 | 1 | 0 | # | oh |
| 478 | 3 | 6 | -0.950000 | 10.942492343 | -24.455490996 | 8.319917115   | 0 | 1 | 0 | # | oh |
| 479 | 3 | 3 | -1.050000 | 13.451368349 | -24.458526970 | 6.271017583   | 0 | 1 | 0 | # | ob |
| 480 | 3 | 3 | -1.050000 | 14.548205513 | -27.228199320 | 10.366131378  | 0 | 1 | 0 | # | ob |
| 481 | 3 | 3 | -1.050000 | 10.506910908 | -22.594160300 | 12.565579711  | 0 | 1 | 0 | # | ob |
| 482 | 3 | 3 | -1.050000 | 13.923064655 | -22.777048519 | 8.299077932   | 0 | 1 | 0 | # | ob |
| 483 | 3 | 3 | -1.050000 | 12.788567264 | -27.058553874 | 6.100653738   | 0 | 1 | 0 | # | ob |
| 484 | 3 | 7 | 2.100000  | 14.576397014 | -27.381980796 | 11.995277170  | 0 | 1 | 0 | # | st |
| 485 | 3 | 7 | 2.100000  | 13.895427774 | -22.935729218 | 6.670701903   | 0 | 1 | 0 | # | st |
| 486 | 3 | 7 | 2.100000  | 11.307102986 | -21.527119204 | 6.669722830   | 0 | 1 | 0 | # | st |
| 487 | 3 | 7 | 2.100000  | 13.895452986 | -25.981669204 | 6.669722830   | 0 | 1 | 0 | # | st |
| 488 | 3 | 7 | 2.100000  | 14.576422226 | -21.518820782 | 11.994298097  | 0 | 1 | 0 | # | st |
| 489 | 3 | 7 | 2.100000  | 11.988072226 | -25.973370782 | 11.994298097  | 0 | 1 | 0 | # | st |
| 490 | 3 | 7 | 2.100000  | 11.988047014 | -22.927430796 | 11.995277170  | 0 | 1 | 0 | # | st |
| 491 | 3 | 7 | 2.100000  | 11.307077774 | -27.390279218 | 6.670701903   | 0 | 1 | 0 | # | st |
| 492 | 3 | 5 | -0.950000 | 15.090866427 | -19.680858114 | -16.076279050 | 0 | 1 | 1 | # | oh |
| 493 | 3 | 5 | -0.950000 | 10.658338203 | -0.272172439  | 15.863272887  | 0 | 0 | 0 | # | oh |
| 494 | 3 | 2 | 0.425000  | 10.309972253 | -1.308055357  | 15.669139507  | 0 | 0 | 0 | # | ho |

|     |   |   |           |               |               |               |   |   |   |   |     |
|-----|---|---|-----------|---------------|---------------|---------------|---|---|---|---|-----|
| 495 | 3 | 2 | 0.425000  | 15.353388619  | -1.054326608  | -15.567929463 | 0 | 0 | 1 | # | ho  |
| 496 | 3 | 2 | 0.425000  | 15.217248964  | -18.596754758 | -16.278386456 | 0 | 1 | 1 | # | ho  |
| 497 | 3 | 2 | 0.425000  | 10.466448915  | -19.012312375 | 15.301136949  | 0 | 1 | 0 | # | ho  |
| 498 | 4 | 1 | 1.575000  | -12.941544971 | 1.474661568   | 9.332770632   | 1 | 0 | 0 | # | ao  |
| 499 | 4 | 1 | 1.575000  | -15.529894971 | 5.929211568   | 9.332770632   | 1 | 0 | 0 | # | ao  |
| 500 | 4 | 1 | 1.575000  | -12.941955029 | 7.434438432   | 9.332229368   | 1 | 0 | 0 | # | ao  |
| 501 | 4 | 1 | 1.575000  | -10.353605029 | 2.979888432   | 9.332229368   | 1 | 0 | 0 | # | ao  |
| 502 | 4 | 2 | 0.425000  | -11.795449128 | 4.457267322   | 10.818615063  | 1 | 0 | 0 | # | ho  |
| 503 | 4 | 2 | 0.425000  | -14.383799128 | 0.002717322   | 10.818615063  | 1 | 0 | 0 | # | ho  |
| 504 | 4 | 2 | 0.425000  | -14.088050872 | 4.451832678   | 7.846384937   | 1 | 0 | 0 | # | ho  |
| 505 | 4 | 2 | 0.425000  | -11.499700872 | 8.906382678   | 7.846384937   | 1 | 0 | 0 | # | ho  |
| 506 | 4 | 3 | -1.050000 | -14.548785345 | 1.677501481   | 8.299077932   | 1 | 0 | 0 | # | ob  |
| 507 | 4 | 3 | -1.050000 | -10.506582736 | 6.305096126   | 6.100653738   | 1 | 0 | 0 | # | ob  |
| 508 | 4 | 3 | -1.050000 | -11.959855513 | 2.773649320   | 8.298868622   | 1 | 0 | 0 | # | ob  |
| 509 | 4 | 3 | -1.050000 | -13.095260908 | 7.048710300   | 6.099420289   | 1 | 0 | 0 | # | ob  |
| 510 | 4 | 3 | -1.050000 | -14.548205513 | 7.228199320   | 8.298868622   | 1 | 0 | 0 | # | ob  |
| 511 | 4 | 3 | -1.050000 | -13.923644487 | 6.135450680   | 10.366131378  | 1 | 0 | 0 | # | ob  |
| 512 | 4 | 3 | -1.050000 | -10.506910908 | 2.594160300   | 6.099420289   | 1 | 0 | 0 | # | ob  |
| 513 | 4 | 3 | -1.050000 | -13.923064655 | 2.777048519   | 10.365922068  | 1 | 0 | 0 | # | ob  |
| 514 | 4 | 3 | -1.050000 | -12.788567264 | 7.058553874   | 12.564346262  | 1 | 0 | 0 | # | ob  |
| 515 | 4 | 3 | -1.050000 | -11.334714655 | 7.231598519   | 10.365922068  | 1 | 0 | 0 | # | ob  |
| 516 | 4 | 3 | -1.050000 | -15.376917264 | 2.604003874   | 12.564346262  | 1 | 0 | 0 | # | ob  |
| 517 | 4 | 3 | -1.050000 | -12.788239092 | 1.860389700   | 12.565579711  | 1 | 0 | 0 | # | ob  |
| 518 | 4 | 4 | -0.950000 | -13.530842343 | 0.000940996   | 10.345082885  | 1 | 0 | 0 | # | oho |
| 519 | 4 | 5 | -0.950000 | -10.863018349 | 0.003976970   | 12.393982417  | 1 | 0 | 0 | # | oht |
| 520 | 4 | 6 | -0.950000 | -10.942492343 | 4.455490996   | 10.345082885  | 1 | 0 | 0 | # | oh  |
| 521 | 4 | 3 | -1.050000 | -13.451368349 | 4.458526970   | 12.393982417  | 1 | 0 | 0 | # | ob  |
| 522 | 4 | 6 | -0.950000 | -12.352657657 | 8.908159004   | 8.319917115   | 1 | 0 | 0 | # | oh  |
| 523 | 4 | 3 | -1.050000 | -15.020481651 | 8.905123030   | 6.271017583   | 1 | 0 | 0 | # | ob  |
| 524 | 4 | 6 | -0.950000 | -14.941007657 | 4.453609004   | 8.319917115   | 1 | 0 | 0 | # | oh  |
| 525 | 4 | 3 | -1.050000 | -12.432131651 | 4.450573030   | 6.271017583   | 1 | 0 | 0 | # | ob  |
| 526 | 4 | 3 | -1.050000 | -11.335294487 | 1.680900680   | 10.366131378  | 1 | 0 | 0 | # | ob  |
| 527 | 4 | 3 | -1.050000 | -15.376589092 | 6.314939700   | 12.565579711  | 1 | 0 | 0 | # | ob  |
| 528 | 4 | 3 | -1.050000 | -11.960435345 | 6.132051481   | 8.299077932   | 1 | 0 | 0 | # | ob  |
| 529 | 4 | 3 | -1.050000 | -13.094932736 | 1.850546126   | 6.100653738   | 1 | 0 | 0 | # | ob  |
| 530 | 4 | 7 | 2.100000  | -11.307102986 | 1.527119204   | 11.995277170  | 1 | 0 | 0 | # | st  |
| 531 | 4 | 7 | 2.100000  | -11.988072226 | 5.973370782   | 6.670701903   | 1 | 0 | 0 | # | st  |
| 532 | 4 | 7 | 2.100000  | -14.576397014 | 7.381980796   | 6.669722830   | 1 | 0 | 0 | # | st  |
| 533 | 4 | 7 | 2.100000  | -11.988047014 | 2.927430796   | 6.669722830   | 1 | 0 | 0 | # | st  |
| 534 | 4 | 7 | 2.100000  | -11.307077774 | 7.390279218   | 11.994298097  | 1 | 0 | 0 | # | st  |
| 535 | 4 | 7 | 2.100000  | -13.895427774 | 2.935729218   | 11.994298097  | 1 | 0 | 0 | # | st  |
| 536 | 4 | 7 | 2.100000  | -13.895452986 | 5.981669204   | 11.995277170  | 1 | 0 | 0 | # | st  |
| 537 | 4 | 7 | 2.100000  | -14.576422226 | 1.518820782   | 6.670701903   | 1 | 0 | 0 | # | st  |
| 538 | 4 | 1 | 1.575000  | -12.941544971 | 10.383761568  | 9.332770632   | 1 | 0 | 0 | # | ao  |
| 539 | 4 | 1 | 1.575000  | -15.529894971 | 14.838311568  | 9.332770632   | 1 | 0 | 0 | # | ao  |
| 540 | 4 | 1 | 1.575000  | -12.941955029 | 16.343538432  | 9.332229368   | 1 | 0 | 0 | # | ao  |
| 541 | 4 | 1 | 1.575000  | -10.353605029 | 11.888988432  | 9.332229368   | 1 | 0 | 0 | # | ao  |
| 542 | 4 | 2 | 0.425000  | -11.795449128 | 13.366367322  | 10.818615063  | 1 | 0 | 0 | # | ho  |
| 543 | 4 | 2 | 0.425000  | -14.383799128 | 8.911817322   | 10.818615063  | 1 | 0 | 0 | # | ho  |
| 544 | 4 | 2 | 0.425000  | -14.088050872 | 13.360932678  | 7.846384937   | 1 | 0 | 0 | # | ho  |
| 545 | 4 | 2 | 0.425000  | -11.499700872 | 17.815482678  | 7.846384937   | 1 | 0 | 0 | # | ho  |
| 546 | 4 | 3 | -1.050000 | -14.548785345 | 10.586601481  | 8.299077932   | 1 | 0 | 0 | # | ob  |
| 547 | 4 | 3 | -1.050000 | -10.506582736 | 15.214196126  | 6.100653738   | 1 | 0 | 0 | # | ob  |
| 548 | 4 | 3 | -1.050000 | -11.959855513 | 11.682749320  | 8.298868622   | 1 | 0 | 0 | # | ob  |
| 549 | 4 | 3 | -1.050000 | -13.095260908 | 15.957810300  | 6.099420289   | 1 | 0 | 0 | # | ob  |
| 550 | 4 | 3 | -1.050000 | -14.548205513 | 16.137299320  | 8.298868622   | 1 | 0 | 0 | # | ob  |
| 551 | 4 | 3 | -1.050000 | -13.923644487 | 15.044550680  | 10.366131378  | 1 | 0 | 0 | # | ob  |
| 552 | 4 | 3 | -1.050000 | -10.506910908 | 11.503260300  | 6.099420289   | 1 | 0 | 0 | # | ob  |
| 553 | 4 | 3 | -1.050000 | -13.923064655 | 11.686148519  | 10.365922068  | 1 | 0 | 0 | # | ob  |
| 554 | 4 | 3 | -1.050000 | -12.788567264 | 15.967653874  | 12.564346262  | 1 | 0 | 0 | # | ob  |
| 555 | 4 | 3 | -1.050000 | -11.334714655 | 16.140698519  | 10.365922068  | 1 | 0 | 0 | # | ob  |
| 556 | 4 | 3 | -1.050000 | -15.376917264 | 11.513103874  | 12.564346262  | 1 | 0 | 0 | # | ob  |
| 557 | 4 | 3 | -1.050000 | -12.788239092 | 10.769489700  | 12.565579711  | 1 | 0 | 0 | # | ob  |
| 558 | 4 | 6 | -0.950000 | -13.530842343 | 8.910040996   | 10.345082885  | 1 | 0 | 0 | # | oh  |
| 559 | 4 | 3 | -1.050000 | -10.863018349 | 8.913076970   | 12.393982417  | 1 | 0 | 0 | # | ob  |
| 560 | 4 | 6 | -0.950000 | -10.942492343 | 13.364590996  | 10.345082885  | 1 | 0 | 0 | # | oh  |
| 561 | 4 | 3 | -1.050000 | -13.451368349 | 13.367626970  | 12.393982417  | 1 | 0 | 0 | # | ob  |
| 562 | 4 | 6 | -0.950000 | -12.352657657 | 17.817259004  | 8.319917115   | 1 | 0 | 0 | # | oh  |
| 563 | 4 | 3 | -1.050000 | -15.020481651 | 17.814223030  | 6.271017583   | 1 | 0 | 0 | # | ob  |
| 564 | 4 | 6 | -0.950000 | -14.941007657 | 13.362709004  | 8.319917115   | 1 | 0 | 0 | # | oh  |
| 565 | 4 | 3 | -1.050000 | -12.432131651 | 13.359673030  | 6.271017583   | 1 | 0 | 0 | # | ob  |
| 566 | 4 | 3 | -1.050000 | -11.335294487 | 10.590000680  | 10.366131378  | 1 | 0 | 0 | # | ob  |
| 567 | 4 | 3 | -1.050000 | -15.376589092 | 15.224039700  | 12.565579711  | 1 | 0 | 0 | # | ob  |
| 568 | 4 | 3 | -1.050000 | -11.960435345 | 15.041151481  | 8.299077932   | 1 | 0 | 0 | # | ob  |
| 569 | 4 | 3 | -1.050000 | -13.094932736 | 10.759646126  | 6.100653738   | 1 | 0 | 0 | # | ob  |
| 570 | 4 | 7 | 2.100000  | -11.307102986 | 10.436219204  | 11.995277170  | 1 | 0 | 0 | # | st  |
| 571 | 4 | 7 | 2.100000  | -11.988072226 | 14.882470782  | 6.670701903   | 1 | 0 | 0 | # | st  |
| 572 | 4 | 7 | 2.100000  | -14.576397014 | 16.291080796  | 6.669722830   | 1 | 0 | 0 | # | st  |
| 573 | 4 | 7 | 2.100000  | -11.988047014 | 11.836530796  | 6.669722830   | 1 | 0 | 0 | # | st  |
| 574 | 4 | 7 | 2.100000  | -11.307077774 | 16.299379218  | 11.994298097  | 1 | 0 | 0 | # | st  |
| 575 | 4 | 7 | 2.100000  | -13.895427774 | 11.844829218  | 11.994298097  | 1 | 0 | 0 | # | st  |
| 576 | 4 | 7 | 2.100000  | -13.895452986 | 14.890769204  | 11.995277170  | 1 | 0 | 0 | # | st  |
| 577 | 4 | 7 | 2.100000  | -14.576422226 | 10.427920782  | 6.670701903   | 1 | 0 | 0 | # | st  |
| 578 | 4 | 1 | 1.575000  | -12.941544971 | 19.292861568  | 9.332770632   | 1 | 0 | 0 | # | ao  |
| 579 | 4 | 1 | 1.575000  | -15.529894971 | 23.747411568  | 9.332770632   | 1 | 0 | 0 | # | ao  |
| 580 | 4 | 1 | 1.575000  | -12.941955029 | 25.252638432  | 9.332229368   | 1 | 0 | 0 | # | ao  |
| 581 | 4 | 1 | 1.575000  | -10.353605029 | 20.798088432  | 9.332229368   | 1 | 0 | 0 | # | ao  |
| 582 | 4 | 2 | 0.425000  | -11.795449128 | 22.275467322  | 10.818615063  | 1 | 0 | 0 | # | ho  |
| 583 | 4 | 2 | 0.425000  | -14.383799128 | 17.820917322  | 10.818615063  | 1 | 0 | 0 | # | ho  |
| 584 | 4 | 2 | 0.425000  | -14.088050872 | 22.270032678  | 7.846384937   | 1 | 0 | 0 | # | ho  |
| 585 | 4 | 2 | 0.425000  | -11.499700872 | 26.724582678  | 7.846384937   | 1 | 0 | 0 | # | ho  |
| 586 | 4 | 3 | -1.050000 | -14.548785345 | 19.495701481  | 8.299077932   | 1 | 0 | 0 | # | ob  |
| 587 | 4 | 3 | -1.050000 | -10.506582736 | 24.123296126  | 6.100653738   | 1 | 0 | 0 | # | ob  |

588 4 3 -1.050000 -11.959855513 20.591849320 8.298868622 1 0 0 # ob  
589 4 3 -1.050000 -13.095260908 24.866910300 6.099420289 1 0 0 # ob  
590 4 3 -1.050000 -14.548205513 25.046399320 8.298868622 1 0 0 # ob  
591 4 3 -1.050000 -13.923644487 23.953650680 10.366131378 1 0 0 # ob  
592 4 3 -1.050000 -10.506910908 20.412360300 6.099420289 1 0 0 # ob  
593 4 3 -1.050000 -13.923064655 20.595248519 10.365922068 1 0 0 # ob  
594 4 3 -1.050000 -12.788567264 24.876753874 12.564346262 1 0 0 # ob  
595 4 3 -1.050000 -11.334714655 25.049798519 10.365922068 1 0 0 # ob  
596 4 3 -1.050000 -15.376917264 20.422203874 12.564346262 1 0 0 # ob  
597 4 3 -1.050000 -12.788239092 19.678589700 12.565579711 1 0 0 # ob  
598 4 6 -0.950000 -13.530842343 17.819140996 10.345082885 1 0 0 # oh  
599 4 3 -1.050000 -10.863018349 17.822176970 12.393982417 1 0 0 # ob  
600 4 6 -0.950000 -10.942492343 22.273690996 10.345082885 1 0 0 # oh  
601 4 3 -1.050000 -13.451368349 22.276726970 12.393982417 1 0 0 # ob  
602 4 6 -0.950000 -12.352657657 26.726359004 8.319917115 1 0 0 # oh  
603 4 3 -1.050000 -15.020481651 26.723323030 6.271017583 1 0 0 # ob  
604 4 6 -0.950000 -14.941007657 22.271809004 8.319917115 1 0 0 # oh  
605 4 3 -1.050000 -12.432131651 22.268773030 6.271017583 1 0 0 # ob  
606 4 3 -1.050000 -11.335294487 19.499100680 10.366131378 1 0 0 # ob  
607 4 3 -1.050000 -15.376589092 24.133139700 12.565579711 1 0 0 # ob  
608 4 3 -1.050000 -11.960435345 23.950251481 8.299077932 1 0 0 # ob  
609 4 3 -1.050000 -13.094932736 19.668746126 6.100653738 1 0 0 # ob  
610 4 7 2.100000 -11.307102986 19.345319204 11.995277170 1 0 0 # st  
611 4 7 2.100000 -11.988072226 23.791570782 6.670701903 1 0 0 # st  
612 4 7 2.100000 -14.576397014 25.200180796 6.669722830 1 0 0 # st  
613 4 7 2.100000 -11.988047014 20.745630796 6.669722830 1 0 0 # st  
614 4 7 2.100000 -11.307077774 25.208479218 11.994298097 1 0 0 # st  
615 4 7 2.100000 -13.895427774 20.753929218 11.994298097 1 0 0 # st  
616 4 7 2.100000 -13.895452986 23.799869204 11.995277170 1 0 0 # st  
617 4 7 2.100000 -14.576422226 19.337020782 6.670701903 1 0 0 # st  
618 4 1 1.575000 -12.941544971 -27.434438432 9.332770632 1 1 0 # ao  
619 4 1 1.575000 -15.529894971 -22.979888432 9.332770632 1 1 0 # ao  
620 4 1 1.575000 -12.941955029 -21.474661568 9.332229368 1 1 0 # ao  
621 4 1 1.575000 -10.353605029 -25.929211568 9.332229368 1 1 0 # ao  
622 4 2 0.425000 -11.795449128 -24.451832678 10.818615063 1 1 0 # ho  
623 4 2 0.425000 -14.383799128 26.730017322 10.818615063 1 0 0 # ho  
624 4 2 0.425000 -14.088050872 -24.457267322 7.846384937 1 1 0 # ho  
625 4 2 0.425000 -11.499700872 -20.002717322 7.846384937 1 1 0 # ho  
626 4 3 -1.050000 -14.548785345 -27.231598519 8.299077932 1 1 0 # ob  
627 4 3 -1.050000 -10.506582736 -22.604003874 6.100653738 1 1 0 # ob  
628 4 3 -1.050000 -11.959855513 -26.135450680 8.298868622 1 1 0 # ob  
629 4 3 -1.050000 -13.095260908 -21.860389700 6.099420289 1 1 0 # ob  
630 4 3 -1.050000 -14.548205513 -21.680900680 8.298868622 1 1 0 # ob  
631 4 3 -1.050000 -13.923644487 -22.773649320 10.366131378 1 1 0 # ob  
632 4 3 -1.050000 -10.506910908 -26.314939700 6.099420289 1 1 0 # ob  
633 4 3 -1.050000 -13.923064655 -26.132051481 10.365922068 1 1 0 # ob  
634 4 3 -1.050000 -12.788567264 -21.850546126 12.564346262 1 1 0 # ob  
635 4 3 -1.050000 -11.334714655 -21.677501481 10.365922068 1 1 0 # ob  
636 4 3 -1.050000 -15.376917264 -26.305096126 12.564346262 1 1 0 # ob  
637 4 3 -1.050000 -12.788239092 -27.048710300 12.565579711 1 1 0 # ob  
638 4 6 -0.950000 -13.530842343 26.728240996 10.345082885 1 0 0 # oh  
639 4 3 -1.050000 -10.863018349 26.731276970 12.393982417 1 0 0 # ob  
640 4 6 -0.950000 -10.942492343 -24.453609004 10.345082885 1 1 0 # oh  
641 4 3 -1.050000 -13.451368349 -24.450573030 12.393982417 1 1 0 # ob  
642 4 4 -0.950000 -12.352657657 -20.000940996 8.319917115 1 1 0 # oho  
643 4 5 -0.950000 -15.020481651 -20.003976970 6.271017583 1 1 0 # oht  
644 4 6 -0.950000 -14.941007657 -24.455490996 8.319917115 1 1 0 # oh  
645 4 3 -1.050000 -12.432131651 -24.458526970 6.271017583 1 1 0 # ob  
646 4 3 -1.050000 -11.335294487 -27.228199320 10.366131378 1 1 0 # ob  
647 4 3 -1.050000 -15.376589092 -22.594160300 12.565579711 1 1 0 # ob  
648 4 3 -1.050000 -11.960435345 -22.777048519 8.299077932 1 1 0 # ob  
649 4 3 -1.050000 -13.094932736 -27.058553874 6.100653738 1 1 0 # ob  
650 4 7 2.100000 -11.307102986 -27.381980796 11.995277170 1 1 0 # st  
651 4 7 2.100000 -11.988072226 -22.935729218 6.670701903 1 1 0 # st  
652 4 7 2.100000 -14.576397014 -21.527119204 6.669722830 1 1 0 # st  
653 4 7 2.100000 -11.988047014 -25.981669204 6.669722830 1 1 0 # st  
654 4 7 2.100000 -11.307077774 -21.518820782 11.994298097 1 1 0 # st  
655 4 7 2.100000 -13.895427774 -25.973370782 11.994298097 1 1 0 # st  
656 4 7 2.100000 -13.895452986 -22.927430796 11.995277170 1 1 0 # st  
657 4 7 2.100000 -14.576422226 -27.390279218 6.670701903 1 1 0 # st  
658 4 5 -0.950000 -10.792633573 -19.680858114 -16.076279050 1 1 1 # oht  
659 4 5 -0.950000 -15.225161797 -0.272172439 15.863272887 1 0 0 # oht  
660 4 2 0.425000 15.486672253 -1.308055357 15.669139507 0 0 0 # ho  
661 4 2 0.425000 -10.530111381 -1.054326608 -15.567929463 1 0 1 # ho  
662 4 2 0.425000 -10.666251036 -18.596754758 -16.278386456 1 1 1 # ho  
663 4 2 0.425000 -15.417051085 -19.012312375 15.301136949 1 1 0 # ho  
664 5 1 1.575000 -7.764844971 1.474661568 9.332770632 1 0 0 # ao  
665 5 1 1.575000 -10.353194971 5.929211568 9.332770632 1 0 0 # ao  
666 5 1 1.575000 -7.765255029 7.434438432 9.332229368 1 0 0 # ao  
667 5 1 1.575000 -5.176905029 2.979888432 9.332229368 1 0 0 # ao  
668 5 2 0.425000 -6.618749128 4.457267322 10.818615063 1 0 0 # ho  
669 5 2 0.425000 -9.207099128 0.002717322 10.818615063 1 0 0 # ho  
670 5 2 0.425000 -8.911350872 4.451832678 7.846384937 1 0 0 # ho  
671 5 2 0.425000 -6.323000872 8.906382678 7.846384937 1 0 0 # ho  
672 5 3 -1.050000 -9.372085345 1.677501481 8.299077932 1 0 0 # ob  
673 5 3 -1.050000 -5.329882736 6.305096126 6.100653738 1 0 0 # ob  
674 5 3 -1.050000 -6.783155513 2.773649320 8.298868622 1 0 0 # ob  
675 5 3 -1.050000 -7.918560908 7.048710300 6.099420289 1 0 0 # ob  
676 5 3 -1.050000 -9.371505513 7.228199320 8.298868622 1 0 0 # ob  
677 5 3 -1.050000 -8.746944487 6.135450680 10.366131378 1 0 0 # ob  
678 5 3 -1.050000 -5.330210908 2.594160300 6.099420289 1 0 0 # ob  
679 5 3 -1.050000 -8.746364655 2.777048519 10.365922068 1 0 0 # ob  
680 5 3 -1.050000 -7.611867264 7.058553874 12.564346262 1 0 0 # ob

|     |   |   |           |               |              |              |   |   |   |   |     |
|-----|---|---|-----------|---------------|--------------|--------------|---|---|---|---|-----|
| 681 | 5 | 3 | -1.050000 | -6.158014655  | 7.231598519  | 10.365922068 | 1 | 0 | 0 | # | ob  |
| 682 | 5 | 3 | -1.050000 | -10.200217264 | 2.604003874  | 12.564346262 | 1 | 0 | 0 | # | ob  |
| 683 | 5 | 3 | -1.050000 | -7.611539092  | 1.860389700  | 12.565579711 | 1 | 0 | 0 | # | ob  |
| 684 | 5 | 4 | -0.950000 | -8.354142343  | 0.000940996  | 10.345082885 | 1 | 0 | 0 | # | oho |
| 685 | 5 | 5 | -0.950000 | -5.686318349  | 0.003976970  | 12.393982417 | 1 | 0 | 0 | # | oht |
| 686 | 5 | 6 | -0.950000 | -5.765792343  | 4.455490996  | 10.345082885 | 1 | 0 | 0 | # | oh  |
| 687 | 5 | 3 | -1.050000 | -8.274668349  | 4.458526970  | 12.393982417 | 1 | 0 | 0 | # | ob  |
| 688 | 5 | 6 | -0.950000 | -7.175957657  | 8.908159004  | 8.319917115  | 1 | 0 | 0 | # | oh  |
| 689 | 5 | 3 | -1.050000 | -9.843781651  | 8.905123030  | 6.271017583  | 1 | 0 | 0 | # | ob  |
| 690 | 5 | 6 | -0.950000 | -9.764307657  | 4.453609004  | 8.319917115  | 1 | 0 | 0 | # | oh  |
| 691 | 5 | 3 | -1.050000 | -7.255431651  | 4.450573030  | 6.271017583  | 1 | 0 | 0 | # | ob  |
| 692 | 5 | 3 | -1.050000 | -6.158594487  | 1.680900680  | 10.366131378 | 1 | 0 | 0 | # | ob  |
| 693 | 5 | 3 | -1.050000 | -10.199889092 | 6.314939700  | 12.565579711 | 1 | 0 | 0 | # | ob  |
| 694 | 5 | 3 | -1.050000 | -6.783735345  | 6.132051481  | 8.299077932  | 1 | 0 | 0 | # | ob  |
| 695 | 5 | 3 | -1.050000 | -7.918232736  | 1.850546126  | 6.100653738  | 1 | 0 | 0 | # | ob  |
| 696 | 5 | 7 | 2.100000  | -6.130402986  | 1.527119204  | 11.995277170 | 1 | 0 | 0 | # | st  |
| 697 | 5 | 7 | 2.100000  | -6.811372226  | 5.973370782  | 6.670701903  | 1 | 0 | 0 | # | st  |
| 698 | 5 | 7 | 2.100000  | -9.399697014  | 7.381980796  | 6.669722830  | 1 | 0 | 0 | # | st  |
| 699 | 5 | 7 | 2.100000  | -6.811347014  | 2.927430796  | 6.669722830  | 1 | 0 | 0 | # | st  |
| 700 | 5 | 7 | 2.100000  | -6.130377774  | 7.390279218  | 11.994298097 | 1 | 0 | 0 | # | st  |
| 701 | 5 | 7 | 2.100000  | -8.718727774  | 2.935729218  | 11.994298097 | 1 | 0 | 0 | # | st  |
| 702 | 5 | 7 | 2.100000  | -8.718752986  | 5.981669204  | 11.995277170 | 1 | 0 | 0 | # | st  |
| 703 | 5 | 7 | 2.100000  | -9.399722226  | 1.518820782  | 6.670701903  | 1 | 0 | 0 | # | st  |
| 704 | 5 | 1 | 1.575000  | -7.764844971  | 10.383761568 | 9.332770632  | 1 | 0 | 0 | # | ao  |
| 705 | 5 | 1 | 1.575000  | -10.353194971 | 14.838311568 | 9.332770632  | 1 | 0 | 0 | # | ao  |
| 706 | 5 | 1 | 1.575000  | -7.765255029  | 16.343538432 | 9.332229368  | 1 | 0 | 0 | # | ao  |
| 707 | 5 | 1 | 1.575000  | -5.176905029  | 11.888988432 | 9.332229368  | 1 | 0 | 0 | # | ao  |
| 708 | 5 | 2 | 0.425000  | -6.618749128  | 13.366367322 | 10.818615063 | 1 | 0 | 0 | # | ho  |
| 709 | 5 | 2 | 0.425000  | -9.207099128  | 8.911817322  | 10.818615063 | 1 | 0 | 0 | # | ho  |
| 710 | 5 | 2 | 0.425000  | -8.911350872  | 13.360932678 | 7.846384937  | 1 | 0 | 0 | # | ho  |
| 711 | 5 | 2 | 0.425000  | -6.323000872  | 17.815482678 | 7.846384937  | 1 | 0 | 0 | # | ho  |
| 712 | 5 | 3 | -1.050000 | -9.372085345  | 10.586601481 | 8.299077932  | 1 | 0 | 0 | # | ob  |
| 713 | 5 | 3 | -1.050000 | -5.329882736  | 15.214196126 | 6.100653738  | 1 | 0 | 0 | # | ob  |
| 714 | 5 | 3 | -1.050000 | -6.783155513  | 11.682749320 | 8.298868622  | 1 | 0 | 0 | # | ob  |
| 715 | 5 | 3 | -1.050000 | -7.918560908  | 15.957810300 | 6.099420289  | 1 | 0 | 0 | # | ob  |
| 716 | 5 | 3 | -1.050000 | -9.371505513  | 16.137299320 | 8.298868622  | 1 | 0 | 0 | # | ob  |
| 717 | 5 | 3 | -1.050000 | -8.746944487  | 15.044550680 | 10.366131378 | 1 | 0 | 0 | # | ob  |
| 718 | 5 | 3 | -1.050000 | -5.330210908  | 11.503260300 | 6.099420289  | 1 | 0 | 0 | # | ob  |
| 719 | 5 | 3 | -1.050000 | -8.746364655  | 11.686148519 | 10.365922068 | 1 | 0 | 0 | # | ob  |
| 720 | 5 | 3 | -1.050000 | -7.611867264  | 15.967653874 | 12.564346262 | 1 | 0 | 0 | # | ob  |
| 721 | 5 | 3 | -1.050000 | -6.158014655  | 16.140698519 | 10.365922068 | 1 | 0 | 0 | # | ob  |
| 722 | 5 | 3 | -1.050000 | -10.200217264 | 11.513103874 | 12.564346262 | 1 | 0 | 0 | # | ob  |
| 723 | 5 | 3 | -1.050000 | -7.611539092  | 10.769489700 | 12.565579711 | 1 | 0 | 0 | # | ob  |
| 724 | 5 | 6 | -0.950000 | -8.354142343  | 8.910040996  | 10.345082885 | 1 | 0 | 0 | # | oh  |
| 725 | 5 | 3 | -1.050000 | -5.686318349  | 8.913076970  | 12.393982417 | 1 | 0 | 0 | # | ob  |
| 726 | 5 | 6 | -0.950000 | -5.765792343  | 13.364590996 | 10.345082885 | 1 | 0 | 0 | # | oh  |
| 727 | 5 | 3 | -1.050000 | -8.274668349  | 13.367626970 | 12.393982417 | 1 | 0 | 0 | # | ob  |
| 728 | 5 | 6 | -0.950000 | -7.175957657  | 17.817259004 | 8.319917115  | 1 | 0 | 0 | # | oh  |
| 729 | 5 | 3 | -1.050000 | -9.843781651  | 17.814223030 | 6.271017583  | 1 | 0 | 0 | # | ob  |
| 730 | 5 | 6 | -0.950000 | -9.764307657  | 13.362709004 | 8.319917115  | 1 | 0 | 0 | # | oh  |
| 731 | 5 | 3 | -1.050000 | -7.255431651  | 13.359673030 | 6.271017583  | 1 | 0 | 0 | # | ob  |
| 732 | 5 | 3 | -1.050000 | -6.158594487  | 10.590000680 | 10.366131378 | 1 | 0 | 0 | # | ob  |
| 733 | 5 | 3 | -1.050000 | -10.199889092 | 15.224039700 | 12.565579711 | 1 | 0 | 0 | # | ob  |
| 734 | 5 | 3 | -1.050000 | -6.783735345  | 15.041151481 | 8.299077932  | 1 | 0 | 0 | # | ob  |
| 735 | 5 | 3 | -1.050000 | -7.918232736  | 10.759646126 | 6.100653738  | 1 | 0 | 0 | # | ob  |
| 736 | 5 | 7 | 2.100000  | -6.130402986  | 10.436219204 | 11.995277170 | 1 | 0 | 0 | # | st  |
| 737 | 5 | 7 | 2.100000  | -6.811372226  | 14.882470782 | 6.670701903  | 1 | 0 | 0 | # | st  |
| 738 | 5 | 7 | 2.100000  | -9.399697014  | 16.291080796 | 6.669722830  | 1 | 0 | 0 | # | st  |
| 739 | 5 | 7 | 2.100000  | -6.811347014  | 11.836530796 | 6.669722830  | 1 | 0 | 0 | # | st  |
| 740 | 5 | 7 | 2.100000  | -6.130377774  | 16.299379218 | 11.994298097 | 1 | 0 | 0 | # | st  |
| 741 | 5 | 7 | 2.100000  | -8.718727774  | 11.844829218 | 11.994298097 | 1 | 0 | 0 | # | st  |
| 742 | 5 | 7 | 2.100000  | -8.718752986  | 14.890769204 | 11.995277170 | 1 | 0 | 0 | # | st  |
| 743 | 5 | 7 | 2.100000  | -9.399722226  | 10.427920782 | 6.670701903  | 1 | 0 | 0 | # | st  |
| 744 | 5 | 1 | 1.575000  | -7.764844971  | 19.292861568 | 9.332770632  | 1 | 0 | 0 | # | ao  |
| 745 | 5 | 1 | 1.575000  | -10.353194971 | 23.747411568 | 9.332770632  | 1 | 0 | 0 | # | ao  |
| 746 | 5 | 1 | 1.575000  | -7.765255029  | 25.252638432 | 9.332229368  | 1 | 0 | 0 | # | ao  |
| 747 | 5 | 1 | 1.575000  | -5.176905029  | 20.798088432 | 9.332229368  | 1 | 0 | 0 | # | ao  |
| 748 | 5 | 2 | 0.425000  | -6.618749128  | 22.275467322 | 10.818615063 | 1 | 0 | 0 | # | ho  |
| 749 | 5 | 2 | 0.425000  | -9.207099128  | 17.820917322 | 10.818615063 | 1 | 0 | 0 | # | ho  |
| 750 | 5 | 2 | 0.425000  | -8.911350872  | 22.270032678 | 7.846384937  | 1 | 0 | 0 | # | ho  |
| 751 | 5 | 2 | 0.425000  | -6.323000872  | 26.724582678 | 7.846384937  | 1 | 0 | 0 | # | ho  |
| 752 | 5 | 3 | -1.050000 | -9.372085345  | 19.495701481 | 8.299077932  | 1 | 0 | 0 | # | ob  |
| 753 | 5 | 3 | -1.050000 | -5.329882736  | 24.123296126 | 6.100653738  | 1 | 0 | 0 | # | ob  |
| 754 | 5 | 3 | -1.050000 | -6.783155513  | 20.591849320 | 8.298868622  | 1 | 0 | 0 | # | ob  |
| 755 | 5 | 3 | -1.050000 | -7.918560908  | 24.866910300 | 6.099420289  | 1 | 0 | 0 | # | ob  |
| 756 | 5 | 3 | -1.050000 | -9.371505513  | 25.046399320 | 8.298868622  | 1 | 0 | 0 | # | ob  |
| 757 | 5 | 3 | -1.050000 | -8.746944487  | 23.953650680 | 10.366131378 | 1 | 0 | 0 | # | ob  |
| 758 | 5 | 3 | -1.050000 | -5.330210908  | 20.412360300 | 6.099420289  | 1 | 0 | 0 | # | ob  |
| 759 | 5 | 3 | -1.050000 | -8.746364655  | 20.595248519 | 10.365922068 | 1 | 0 | 0 | # | ob  |
| 760 | 5 | 3 | -1.050000 | -7.611867264  | 24.876753874 | 12.564346262 | 1 | 0 | 0 | # | ob  |
| 761 | 5 | 3 | -1.050000 | -6.158014655  | 25.049798519 | 10.365922068 | 1 | 0 | 0 | # | ob  |
| 762 | 5 | 3 | -1.050000 | -10.200217264 | 20.422203874 | 12.564346262 | 1 | 0 | 0 | # | ob  |
| 763 | 5 | 3 | -1.050000 | -7.611539092  | 19.678589700 | 12.565579711 | 1 | 0 | 0 | # | ob  |
| 764 | 5 | 6 | -0.950000 | -8.354142343  | 17.819140996 | 10.345082885 | 1 | 0 | 0 | # | oh  |
| 765 | 5 | 3 | -1.050000 | -5.686318349  | 17.822176970 | 12.393982417 | 1 | 0 | 0 | # | ob  |
| 766 | 5 | 6 | -0.950000 | -5.765792343  | 22.273690996 | 10.345082885 | 1 | 0 | 0 | # | oh  |
| 767 | 5 | 3 | -1.050000 | -8.274668349  | 22.276726970 | 12.393982417 | 1 | 0 | 0 | # | ob  |
| 768 | 5 | 6 | -0.950000 | -7.175957657  | 26.726359004 | 8.319917115  | 1 | 0 | 0 | # | oh  |
| 769 | 5 | 3 | -1.050000 | -9.843781651  | 26.723323030 | 6.271017583  | 1 | 0 | 0 | # | ob  |
| 770 | 5 | 6 | -0.950000 | -9.764307657  | 22.271809004 | 8.319917115  | 1 | 0 | 0 | # | oh  |
| 771 | 5 | 3 | -1.050000 | -7.255431651  | 22.268773030 | 6.271017583  | 1 | 0 | 0 | # | ob  |
| 772 | 5 | 3 | -1.050000 | -6.158594487  | 19.499100680 | 10.366131378 | 1 | 0 | 0 | # | ob  |
| 773 | 5 | 3 | -1.050000 | -10.199889092 | 24.133139700 | 12.565579711 | 1 | 0 | 0 | # | ob  |

|     |   |   |           |               |               |               |   |   |   |   |     |
|-----|---|---|-----------|---------------|---------------|---------------|---|---|---|---|-----|
| 774 | 5 | 3 | -1.050000 | -6.783735345  | 23.950251481  | 8.299077932   | 1 | 0 | 0 | # | ob  |
| 775 | 5 | 3 | -1.050000 | -7.918232736  | 19.668746126  | 6.100653738   | 1 | 0 | 0 | # | ob  |
| 776 | 5 | 7 | 2.100000  | -6.130402986  | 19.345319204  | 11.995277170  | 1 | 0 | 0 | # | st  |
| 777 | 5 | 7 | 2.100000  | -6.811372226  | 23.791570782  | 6.670701903   | 1 | 0 | 0 | # | st  |
| 778 | 5 | 7 | 2.100000  | -9.399697014  | 25.200180796  | 6.669722830   | 1 | 0 | 0 | # | st  |
| 779 | 5 | 7 | 2.100000  | -6.811347014  | 20.745630796  | 6.669722830   | 1 | 0 | 0 | # | st  |
| 780 | 5 | 7 | 2.100000  | -6.130377774  | 25.208479218  | 11.994298097  | 1 | 0 | 0 | # | st  |
| 781 | 5 | 7 | 2.100000  | -8.718727774  | 20.753929218  | 11.994298097  | 1 | 0 | 0 | # | st  |
| 782 | 5 | 7 | 2.100000  | -8.718752986  | 23.799869204  | 11.995277170  | 1 | 0 | 0 | # | st  |
| 783 | 5 | 7 | 2.100000  | -9.399722226  | 19.337020782  | 6.670701903   | 1 | 0 | 0 | # | st  |
| 784 | 5 | 1 | 1.575000  | -7.764844971  | -27.434438432 | 9.332770632   | 1 | 1 | 0 | # | ao  |
| 785 | 5 | 1 | 1.575000  | -10.353194971 | -22.979888432 | 9.332770632   | 1 | 1 | 0 | # | ao  |
| 786 | 5 | 1 | 1.575000  | -7.765255029  | -21.474661568 | 9.332229368   | 1 | 1 | 0 | # | ao  |
| 787 | 5 | 1 | 1.575000  | -5.176905029  | -25.929211568 | 9.332229368   | 1 | 1 | 0 | # | ao  |
| 788 | 5 | 2 | 0.425000  | -6.618749128  | -24.451832678 | 10.818615063  | 1 | 1 | 0 | # | ho  |
| 789 | 5 | 2 | 0.425000  | -9.207099128  | 26.730017322  | 10.818615063  | 1 | 0 | 0 | # | ho  |
| 790 | 5 | 2 | 0.425000  | -8.911350872  | -24.457267322 | 7.846384937   | 1 | 1 | 0 | # | ho  |
| 791 | 5 | 2 | 0.425000  | -6.323000872  | -20.002717322 | 7.846384937   | 1 | 1 | 0 | # | ho  |
| 792 | 5 | 3 | -1.050000 | -9.372085345  | -27.231598519 | 8.299077932   | 1 | 1 | 0 | # | ob  |
| 793 | 5 | 3 | -1.050000 | -5.329882736  | -22.604003874 | 6.100653738   | 1 | 1 | 0 | # | ob  |
| 794 | 5 | 3 | -1.050000 | -6.783155513  | -26.135450680 | 8.298868622   | 1 | 1 | 0 | # | ob  |
| 795 | 5 | 3 | -1.050000 | -7.918560908  | -21.860389700 | 6.099420289   | 1 | 1 | 0 | # | ob  |
| 796 | 5 | 3 | -1.050000 | -9.371505513  | -21.680900680 | 8.298868622   | 1 | 1 | 0 | # | ob  |
| 797 | 5 | 3 | -1.050000 | -8.746944487  | -22.773649320 | 10.366131378  | 1 | 1 | 0 | # | ob  |
| 798 | 5 | 3 | -1.050000 | -5.330210908  | -26.314939700 | 6.099420289   | 1 | 1 | 0 | # | ob  |
| 799 | 5 | 3 | -1.050000 | -8.746364655  | -26.132051481 | 10.365922068  | 1 | 1 | 0 | # | ob  |
| 800 | 5 | 3 | -1.050000 | -7.611867264  | -21.850546126 | 12.564346262  | 1 | 1 | 0 | # | ob  |
| 801 | 5 | 3 | -1.050000 | -6.158014655  | -21.677501481 | 10.365922068  | 1 | 1 | 0 | # | ob  |
| 802 | 5 | 3 | -1.050000 | -10.200217264 | -26.305096126 | 12.564346262  | 1 | 1 | 0 | # | ob  |
| 803 | 5 | 3 | -1.050000 | -7.611539092  | -27.048710300 | 12.565579711  | 1 | 1 | 0 | # | ob  |
| 804 | 5 | 6 | -0.950000 | -8.354142343  | 26.728240996  | 10.345082885  | 1 | 0 | 0 | # | oh  |
| 805 | 5 | 3 | -1.050000 | -5.686318349  | 26.731276970  | 12.393982417  | 1 | 0 | 0 | # | oh  |
| 806 | 5 | 6 | -0.950000 | -5.765792343  | -24.453609004 | 10.345082885  | 1 | 1 | 0 | # | oh  |
| 807 | 5 | 3 | -1.050000 | -8.274668349  | -24.450573030 | 12.393982417  | 1 | 1 | 0 | # | oh  |
| 808 | 5 | 4 | -0.950000 | -7.175957657  | -20.000940996 | 8.319917115   | 1 | 1 | 0 | # | oho |
| 809 | 5 | 5 | -0.950000 | -9.843781651  | -20.003976970 | 6.271017583   | 1 | 1 | 0 | # | oht |
| 810 | 5 | 6 | -0.950000 | -9.764307657  | -24.455490996 | 8.319917115   | 1 | 1 | 0 | # | oh  |
| 811 | 5 | 3 | -1.050000 | -7.255431651  | -24.458526970 | 6.271017583   | 1 | 1 | 0 | # | ob  |
| 812 | 5 | 3 | -1.050000 | -6.158594487  | -27.228199320 | 10.366131378  | 1 | 1 | 0 | # | ob  |
| 813 | 5 | 3 | -1.050000 | -10.199889092 | -22.594160300 | 12.565579711  | 1 | 1 | 0 | # | ob  |
| 814 | 5 | 3 | -1.050000 | -6.783735345  | -22.777048519 | 8.299077932   | 1 | 1 | 0 | # | ob  |
| 815 | 5 | 3 | -1.050000 | -7.918232736  | -27.058553874 | 6.100653738   | 1 | 1 | 0 | # | ob  |
| 816 | 5 | 7 | 2.100000  | -6.130402986  | -27.381980796 | 11.995277170  | 1 | 1 | 0 | # | st  |
| 817 | 5 | 7 | 2.100000  | -6.811372226  | -22.935729218 | 6.670701903   | 1 | 1 | 0 | # | st  |
| 818 | 5 | 7 | 2.100000  | -9.399697014  | -21.527119204 | 6.669722830   | 1 | 1 | 0 | # | st  |
| 819 | 5 | 7 | 2.100000  | -6.811347014  | -25.981669204 | 6.669722830   | 1 | 1 | 0 | # | st  |
| 820 | 5 | 7 | 2.100000  | -6.130377774  | -21.518820782 | 11.994298097  | 1 | 1 | 0 | # | st  |
| 821 | 5 | 7 | 2.100000  | -8.718727774  | -25.973370782 | 11.994298097  | 1 | 1 | 0 | # | st  |
| 822 | 5 | 7 | 2.100000  | -8.718752986  | -22.927430796 | 11.995277170  | 1 | 1 | 0 | # | st  |
| 823 | 5 | 7 | 2.100000  | -9.399722226  | -27.390279218 | 6.670701903   | 1 | 1 | 0 | # | st  |
| 824 | 5 | 5 | -0.950000 | -5.615933573  | -19.680858114 | -16.076279050 | 1 | 1 | 1 | # | oht |
| 825 | 5 | 5 | -0.950000 | -10.048461797 | -0.272172439  | 15.863272887  | 1 | 0 | 0 | # | oht |
| 826 | 5 | 2 | 0.425000  | -10.396827747 | -1.308055357  | 15.669139507  | 1 | 0 | 0 | # | ho  |
| 827 | 5 | 2 | 0.425000  | -5.353411381  | -1.054326608  | -15.567929463 | 1 | 0 | 1 | # | ho  |
| 828 | 5 | 2 | 0.425000  | -5.489551036  | -18.596754758 | -16.278386456 | 1 | 1 | 1 | # | ho  |
| 829 | 5 | 2 | 0.425000  | -10.240351085 | -19.012312375 | 15.301136949  | 1 | 1 | 0 | # | ho  |
| 830 | 6 | 1 | 1.575000  | -2.588144971  | 1.474661568   | 9.332770632   | 1 | 0 | 0 | # | ao  |
| 831 | 6 | 1 | 1.575000  | -5.176494971  | 5.929211568   | 9.332770632   | 1 | 0 | 0 | # | ao  |
| 832 | 6 | 1 | 1.575000  | -2.588555029  | 7.434438432   | 9.332229368   | 1 | 0 | 0 | # | ao  |
| 833 | 6 | 1 | 1.575000  | -0.000205029  | 2.979888432   | 9.332229368   | 1 | 0 | 0 | # | ao  |
| 834 | 6 | 2 | 0.425000  | -1.442049128  | 4.457267322   | 10.818615063  | 1 | 0 | 0 | # | ho  |
| 835 | 6 | 2 | 0.425000  | -4.030399128  | 0.002717322   | 10.818615063  | 1 | 0 | 0 | # | ho  |
| 836 | 6 | 2 | 0.425000  | -3.734650872  | 4.451832678   | 7.846384937   | 1 | 0 | 0 | # | ho  |
| 837 | 6 | 2 | 0.425000  | -1.146300872  | 8.906382678   | 7.846384937   | 1 | 0 | 0 | # | ho  |
| 838 | 6 | 3 | -1.050000 | -4.195385345  | 1.677501481   | 8.299077932   | 1 | 0 | 0 | # | ob  |
| 839 | 6 | 3 | -1.050000 | -0.153182736  | 6.305096126   | 6.100653738   | 1 | 0 | 0 | # | ob  |
| 840 | 6 | 3 | -1.050000 | -1.606455513  | 2.773649320   | 8.298868622   | 1 | 0 | 0 | # | ob  |
| 841 | 6 | 3 | -1.050000 | -2.741860908  | 7.048710300   | 6.099420289   | 1 | 0 | 0 | # | ob  |
| 842 | 6 | 3 | -1.050000 | -4.194805513  | 7.228199320   | 8.298868622   | 1 | 0 | 0 | # | ob  |
| 843 | 6 | 3 | -1.050000 | -3.570244487  | 6.135450680   | 10.366131378  | 1 | 0 | 0 | # | ob  |
| 844 | 6 | 3 | -1.050000 | -0.153510908  | 2.594160300   | 6.099420289   | 1 | 0 | 0 | # | ob  |
| 845 | 6 | 3 | -1.050000 | -3.569664655  | 2.777048519   | 10.365922068  | 1 | 0 | 0 | # | ob  |
| 846 | 6 | 3 | -1.050000 | -2.435167264  | 7.058553874   | 12.564346262  | 1 | 0 | 0 | # | ob  |
| 847 | 6 | 3 | -1.050000 | -0.981314655  | 7.231598519   | 10.365922068  | 1 | 0 | 0 | # | ob  |
| 848 | 6 | 3 | -1.050000 | -5.023517264  | 2.604003874   | 12.564346262  | 1 | 0 | 0 | # | ob  |
| 849 | 6 | 3 | -1.050000 | -2.434839092  | 1.860389700   | 12.565579711  | 1 | 0 | 0 | # | ob  |
| 850 | 6 | 4 | -0.950000 | -3.177442343  | 0.000940996   | 10.345082885  | 1 | 0 | 0 | # | oho |
| 851 | 6 | 5 | -0.950000 | -0.509618349  | 0.003976970   | 12.393982417  | 1 | 0 | 0 | # | oht |
| 852 | 6 | 6 | -0.950000 | -0.589092343  | 4.455490996   | 10.345082885  | 1 | 0 | 0 | # | oh  |
| 853 | 6 | 3 | -1.050000 | -3.097968349  | 4.458526970   | 12.393982417  | 1 | 0 | 0 | # | ob  |
| 854 | 6 | 6 | -0.950000 | -1.999257657  | 8.908159004   | 8.319917115   | 1 | 0 | 0 | # | oh  |
| 855 | 6 | 3 | -1.050000 | -4.667081651  | 8.905123030   | 6.271017583   | 1 | 0 | 0 | # | ob  |
| 856 | 6 | 6 | -0.950000 | -4.587607657  | 4.453609004   | 8.319917115   | 1 | 0 | 0 | # | oh  |
| 857 | 6 | 3 | -1.050000 | -2.078731651  | 4.450573030   | 6.271017583   | 1 | 0 | 0 | # | ob  |
| 858 | 6 | 3 | -1.050000 | -0.981894487  | 1.680900680   | 10.366131378  | 1 | 0 | 0 | # | ob  |
| 859 | 6 | 3 | -1.050000 | -5.023189092  | 6.314939700   | 12.565579711  | 1 | 0 | 0 | # | ob  |
| 860 | 6 | 3 | -1.050000 | -1.607035345  | 6.132051481   | 8.299077932   | 1 | 0 | 0 | # | ob  |
| 861 | 6 | 3 | -1.050000 | -2.741532736  | 1.850546126   | 6.100653738   | 1 | 0 | 0 | # | ob  |
| 862 | 6 | 7 | 2.100000  | -0.953702986  | 1.527119204   | 11.995277170  | 1 | 0 | 0 | # | st  |
| 863 | 6 | 7 | 2.100000  | -1.634672226  | 5.973370782   | 6.670701903   | 1 | 0 | 0 | # | st  |
| 864 | 6 | 7 | 2.100000  | -4.222997014  | 7.381980796   | 6.669722830   | 1 | 0 | 0 | # | st  |
| 865 | 6 | 7 | 2.100000  | -1.634647014  | 2.927430796   | 6.669722830   | 1 | 0 | 0 | # | st  |
| 866 | 6 | 7 | 2.100000  | -0.953677774  | 7.390279218   | 11.994298097  | 1 | 0 | 0 | # | st  |



|     |   |   |           |              |               |              |   |   |   |   |    |
|-----|---|---|-----------|--------------|---------------|--------------|---|---|---|---|----|
| 867 | 6 | 7 | 2.100000  | -3.542027774 | 2.935729218   | 11.994298097 | 1 | 0 | 0 | # | st |
| 868 | 6 | 7 | 2.100000  | -3.542052986 | 5.981669204   | 11.995277170 | 1 | 0 | 0 | # | st |
| 869 | 6 | 7 | 2.100000  | -4.223022226 | 1.518820782   | 6.670701903  | 1 | 0 | 0 | # | st |
| 870 | 6 | 1 | 1.575000  | -2.588144971 | 10.383761568  | 9.332770632  | 1 | 0 | 0 | # | ao |
| 871 | 6 | 1 | 1.575000  | -5.176494971 | 14.838311568  | 9.332770632  | 1 | 0 | 0 | # | ao |
| 872 | 6 | 1 | 1.575000  | -2.588555029 | 16.343538432  | 9.332229368  | 1 | 0 | 0 | # | ao |
| 873 | 6 | 1 | 1.575000  | -0.000205029 | 11.888988432  | 9.332229368  | 1 | 0 | 0 | # | ao |
| 874 | 6 | 2 | 0.425000  | -1.442049128 | 13.366367322  | 10.818615063 | 1 | 0 | 0 | # | ho |
| 875 | 6 | 2 | 0.425000  | -4.030399128 | 8.911817322   | 10.818615063 | 1 | 0 | 0 | # | ho |
| 876 | 6 | 2 | 0.425000  | -3.734650872 | 13.360932678  | 7.846384937  | 1 | 0 | 0 | # | ho |
| 877 | 6 | 2 | 0.425000  | -1.146300872 | 17.815482678  | 7.846384937  | 1 | 0 | 0 | # | ho |
| 878 | 6 | 3 | -1.050000 | -4.195385345 | 10.586601481  | 8.299077932  | 1 | 0 | 0 | # | ob |
| 879 | 6 | 3 | -1.050000 | -0.153182736 | 15.214196126  | 6.100653738  | 1 | 0 | 0 | # | ob |
| 880 | 6 | 3 | -1.050000 | -1.606455513 | 11.682749320  | 8.298868622  | 1 | 0 | 0 | # | ob |
| 881 | 6 | 3 | -1.050000 | -2.741860908 | 15.957810300  | 6.099420289  | 1 | 0 | 0 | # | ob |
| 882 | 6 | 3 | -1.050000 | -4.194805513 | 16.137299320  | 8.298868622  | 1 | 0 | 0 | # | ob |
| 883 | 6 | 3 | -1.050000 | -3.570244487 | 15.044550680  | 10.366131378 | 1 | 0 | 0 | # | ob |
| 884 | 6 | 3 | -1.050000 | -0.153510908 | 11.503260300  | 6.099420289  | 1 | 0 | 0 | # | ob |
| 885 | 6 | 3 | -1.050000 | -3.569664655 | 11.686148519  | 10.365922068 | 1 | 0 | 0 | # | ob |
| 886 | 6 | 3 | -1.050000 | -2.435167264 | 15.967653874  | 12.564346262 | 1 | 0 | 0 | # | ob |
| 887 | 6 | 3 | -1.050000 | -0.981314655 | 16.140698519  | 10.365922068 | 1 | 0 | 0 | # | ob |
| 888 | 6 | 3 | -1.050000 | -5.023517264 | 11.513103874  | 12.564346262 | 1 | 0 | 0 | # | ob |
| 889 | 6 | 3 | -1.050000 | -2.434839092 | 10.769489700  | 12.565579711 | 1 | 0 | 0 | # | ob |
| 890 | 6 | 6 | -0.950000 | -3.177442343 | 8.910040996   | 10.345082885 | 1 | 0 | 0 | # | oh |
| 891 | 6 | 3 | -1.050000 | -0.509618349 | 8.913076970   | 12.393982417 | 1 | 0 | 0 | # | ob |
| 892 | 6 | 6 | -0.950000 | -0.589092343 | 13.364590996  | 10.345082885 | 1 | 0 | 0 | # | oh |
| 893 | 6 | 3 | -1.050000 | -3.097968349 | 13.367626970  | 12.393982417 | 1 | 0 | 0 | # | ob |
| 894 | 6 | 6 | -0.950000 | -1.999257657 | 17.817259004  | 8.319917115  | 1 | 0 | 0 | # | oh |
| 895 | 6 | 3 | -1.050000 | -4.667081651 | 17.814223030  | 6.271017583  | 1 | 0 | 0 | # | ob |
| 896 | 6 | 6 | -0.950000 | -4.587607657 | 13.362709004  | 8.319917115  | 1 | 0 | 0 | # | oh |
| 897 | 6 | 3 | -1.050000 | -2.078731651 | 13.359673030  | 6.271017583  | 1 | 0 | 0 | # | ob |
| 898 | 6 | 3 | -1.050000 | -0.981894487 | 10.590000680  | 10.366131378 | 1 | 0 | 0 | # | ob |
| 899 | 6 | 3 | -1.050000 | -5.023189092 | 15.224039700  | 12.565579711 | 1 | 0 | 0 | # | ob |
| 900 | 6 | 3 | -1.050000 | -1.607035345 | 15.041151481  | 8.299077932  | 1 | 0 | 0 | # | ob |
| 901 | 6 | 3 | -1.050000 | -2.741532736 | 10.759646126  | 6.100653738  | 1 | 0 | 0 | # | ob |
| 902 | 6 | 7 | 2.100000  | -0.953702986 | 10.436219204  | 11.995277170 | 1 | 0 | 0 | # | st |
| 903 | 6 | 7 | 2.100000  | -1.634672226 | 14.882470782  | 6.670701903  | 1 | 0 | 0 | # | st |
| 904 | 6 | 7 | 2.100000  | -4.222997014 | 16.291080796  | 6.669722830  | 1 | 0 | 0 | # | st |
| 905 | 6 | 7 | 2.100000  | -1.634647014 | 11.836530796  | 6.669722830  | 1 | 0 | 0 | # | st |
| 906 | 6 | 7 | 2.100000  | -0.953677774 | 16.299379218  | 11.994298097 | 1 | 0 | 0 | # | st |
| 907 | 6 | 7 | 2.100000  | -3.542027774 | 11.844829218  | 11.994298097 | 1 | 0 | 0 | # | st |
| 908 | 6 | 7 | 2.100000  | -3.542052986 | 14.890769204  | 11.995277170 | 1 | 0 | 0 | # | st |
| 909 | 6 | 7 | 2.100000  | -4.223022226 | 10.427920782  | 6.670701903  | 1 | 0 | 0 | # | st |
| 910 | 6 | 1 | 1.575000  | -2.588144971 | 19.292861568  | 9.332770632  | 1 | 0 | 0 | # | ao |
| 911 | 6 | 1 | 1.575000  | -5.176494971 | 23.747411568  | 9.332770632  | 1 | 0 | 0 | # | ao |
| 912 | 6 | 1 | 1.575000  | -2.588555029 | 25.252638432  | 9.332229368  | 1 | 0 | 0 | # | ao |
| 913 | 6 | 1 | 1.575000  | -0.000205029 | 20.798088432  | 9.332229368  | 1 | 0 | 0 | # | ao |
| 914 | 6 | 2 | 0.425000  | -1.442049128 | 22.275467322  | 10.818615063 | 1 | 0 | 0 | # | ho |
| 915 | 6 | 2 | 0.425000  | -4.030399128 | 17.820917322  | 10.818615063 | 1 | 0 | 0 | # | ho |
| 916 | 6 | 2 | 0.425000  | -3.734650872 | 22.270032678  | 7.846384937  | 1 | 0 | 0 | # | ho |
| 917 | 6 | 2 | 0.425000  | -1.146300872 | 26.724582678  | 7.846384937  | 1 | 0 | 0 | # | ho |
| 918 | 6 | 3 | -1.050000 | -4.195385345 | 19.495701481  | 8.299077932  | 1 | 0 | 0 | # | ob |
| 919 | 6 | 3 | -1.050000 | -0.153182736 | 24.123296126  | 6.100653738  | 1 | 0 | 0 | # | ob |
| 920 | 6 | 3 | -1.050000 | -1.606455513 | 20.591849320  | 8.298868622  | 1 | 0 | 0 | # | ob |
| 921 | 6 | 3 | -1.050000 | -2.741860908 | 24.866910300  | 6.099420289  | 1 | 0 | 0 | # | ob |
| 922 | 6 | 3 | -1.050000 | -4.194805513 | 25.046399320  | 8.298868622  | 1 | 0 | 0 | # | ob |
| 923 | 6 | 3 | -1.050000 | -3.570244487 | 23.953650680  | 10.366131378 | 1 | 0 | 0 | # | ob |
| 924 | 6 | 3 | -1.050000 | -0.153510908 | 20.412360300  | 6.099420289  | 1 | 0 | 0 | # | ob |
| 925 | 6 | 3 | -1.050000 | -3.569664655 | 20.595248519  | 10.365922068 | 1 | 0 | 0 | # | ob |
| 926 | 6 | 3 | -1.050000 | -2.435167264 | 24.876753874  | 12.564346262 | 1 | 0 | 0 | # | ob |
| 927 | 6 | 3 | -1.050000 | -0.981314655 | 25.049798519  | 10.365922068 | 1 | 0 | 0 | # | ob |
| 928 | 6 | 3 | -1.050000 | -5.023517264 | 20.422203874  | 12.564346262 | 1 | 0 | 0 | # | ob |
| 929 | 6 | 3 | -1.050000 | -2.434839092 | 19.678589700  | 12.565579711 | 1 | 0 | 0 | # | ob |
| 930 | 6 | 6 | -0.950000 | -3.177442343 | 17.819140996  | 10.345082885 | 1 | 0 | 0 | # | oh |
| 931 | 6 | 3 | -1.050000 | -0.509618349 | 17.822176970  | 12.393982417 | 1 | 0 | 0 | # | ob |
| 932 | 6 | 6 | -0.950000 | -0.589092343 | 22.273690996  | 10.345082885 | 1 | 0 | 0 | # | oh |
| 933 | 6 | 3 | -1.050000 | -3.097968349 | 22.276726970  | 12.393982417 | 1 | 0 | 0 | # | ob |
| 934 | 6 | 6 | -0.950000 | -1.999257657 | 26.726359004  | 8.319917115  | 1 | 0 | 0 | # | oh |
| 935 | 6 | 3 | -1.050000 | -4.667081651 | 26.723323030  | 6.271017583  | 1 | 0 | 0 | # | ob |
| 936 | 6 | 6 | -0.950000 | -4.587607657 | 22.271809004  | 8.319917115  | 1 | 0 | 0 | # | oh |
| 937 | 6 | 3 | -1.050000 | -2.078731651 | 22.268773030  | 6.271017583  | 1 | 0 | 0 | # | ob |
| 938 | 6 | 3 | -1.050000 | -0.981894487 | 19.499100680  | 10.366131378 | 1 | 0 | 0 | # | ob |
| 939 | 6 | 3 | -1.050000 | -5.023189092 | 24.133139700  | 12.565579711 | 1 | 0 | 0 | # | ob |
| 940 | 6 | 3 | -1.050000 | -1.607035345 | 23.950251481  | 8.299077932  | 1 | 0 | 0 | # | ob |
| 941 | 6 | 3 | -1.050000 | -2.741532736 | 19.668746126  | 6.100653738  | 1 | 0 | 0 | # | ob |
| 942 | 6 | 7 | 2.100000  | -0.953702986 | 19.345319204  | 11.995277170 | 1 | 0 | 0 | # | st |
| 943 | 6 | 7 | 2.100000  | -1.634672226 | 23.791570782  | 6.670701903  | 1 | 0 | 0 | # | st |
| 944 | 6 | 7 | 2.100000  | -4.222997014 | 25.200180796  | 6.669722830  | 1 | 0 | 0 | # | st |
| 945 | 6 | 7 | 2.100000  | -1.634647014 | 20.745630796  | 6.669722830  | 1 | 0 | 0 | # | st |
| 946 | 6 | 7 | 2.100000  | -0.953677774 | 25.208479218  | 11.994298097 | 1 | 0 | 0 | # | st |
| 947 | 6 | 7 | 2.100000  | -3.542027774 | 20.753929218  | 11.994298097 | 1 | 0 | 0 | # | st |
| 948 | 6 | 7 | 2.100000  | -3.542052986 | 23.799869204  | 11.995277170 | 1 | 0 | 0 | # | st |
| 949 | 6 | 7 | 2.100000  | -4.223022226 | 19.337020782  | 6.670701903  | 1 | 0 | 0 | # | st |
| 950 | 6 | 1 | 1.575000  | -2.588144971 | -27.434438432 | 9.332770632  | 1 | 1 | 0 | # | ao |
| 951 | 6 | 1 | 1.575000  | -5.176494971 | -22.979888432 | 9.332770632  | 1 | 1 | 0 | # | ao |
| 952 | 6 | 1 | 1.575000  | -2.588555029 | -21.474661568 | 9.332229368  | 1 | 1 | 0 | # | ao |
| 953 | 6 | 1 | 1.575000  | -0.000205029 | -25.929211568 | 9.332229368  | 1 | 1 | 0 | # | ao |
| 954 | 6 | 2 | 0.425000  | -1.442049128 | -24.451832678 | 10.818615063 | 1 | 1 | 0 | # | ho |
| 955 | 6 | 2 | 0.425000  | -4.030399128 | 26.730017322  | 10.818615063 | 1 | 0 | 0 | # | ho |
| 956 | 6 | 2 | 0.425000  | -3.734650872 | -24.457267322 | 7.846384937  | 1 | 1 | 0 | # | ho |
| 957 | 6 | 2 | 0.425000  | -1.146300872 | -20.002717322 | 7.846384937  | 1 | 1 | 0 | # | ho |
| 958 | 6 | 3 | -1.050000 | -4.195385345 | -27.231598519 | 8.299077932  | 1 | 1 | 0 | # | ob |
| 959 | 6 | 3 | -1.050000 | -0.153182736 | -22.604003874 | 6.100653738  | 1 | 1 | 0 | # | ob |

|      |   |   |           |              |               |               |   |   |   |   |     |
|------|---|---|-----------|--------------|---------------|---------------|---|---|---|---|-----|
| 960  | 6 | 3 | -1.050000 | -1.606455513 | -26.135450680 | 8.298868622   | 1 | 1 | 0 | # | ob  |
| 961  | 6 | 3 | -1.050000 | -2.741860908 | -21.860389700 | 6.099420289   | 1 | 1 | 0 | # | ob  |
| 962  | 6 | 3 | -1.050000 | -4.194805513 | -21.680900680 | 8.298868622   | 1 | 1 | 0 | # | ob  |
| 963  | 6 | 3 | -1.050000 | -3.570244487 | -22.773649320 | 10.366131378  | 1 | 1 | 0 | # | ob  |
| 964  | 6 | 3 | -1.050000 | -0.153510908 | -26.314939700 | 6.099420289   | 1 | 1 | 0 | # | ob  |
| 965  | 6 | 3 | -1.050000 | -3.569664655 | -26.132051481 | 10.365922068  | 1 | 1 | 0 | # | ob  |
| 966  | 6 | 3 | -1.050000 | -2.435167264 | -21.850546126 | 12.564346262  | 1 | 1 | 0 | # | ob  |
| 967  | 6 | 3 | -1.050000 | -0.981314655 | -21.677501481 | 10.365922068  | 1 | 1 | 0 | # | ob  |
| 968  | 6 | 3 | -1.050000 | -5.023517264 | -26.305096126 | 12.564346262  | 1 | 1 | 0 | # | ob  |
| 969  | 6 | 3 | -1.050000 | -2.434839092 | -27.048710300 | 12.565579711  | 1 | 1 | 0 | # | ob  |
| 970  | 6 | 6 | -0.950000 | -3.177442343 | 26.728240996  | 10.345082885  | 1 | 0 | 0 | # | oh  |
| 971  | 6 | 3 | -1.050000 | -0.509618349 | 26.731276970  | 12.393982417  | 1 | 0 | 0 | # | ob  |
| 972  | 6 | 6 | -0.950000 | -0.589092343 | -24.453609004 | 10.345082885  | 1 | 1 | 0 | # | oh  |
| 973  | 6 | 3 | -1.050000 | -3.097968349 | -24.450573030 | 12.393982417  | 1 | 1 | 0 | # | ob  |
| 974  | 6 | 4 | -0.950000 | -1.999257657 | -20.000940996 | 8.319917115   | 1 | 1 | 0 | # | oho |
| 975  | 6 | 5 | -0.950000 | -4.667081651 | -20.003976970 | 6.271017583   | 1 | 1 | 0 | # | oht |
| 976  | 6 | 6 | -0.950000 | -4.587607657 | -24.455490996 | 8.319917115   | 1 | 1 | 0 | # | oh  |
| 977  | 6 | 3 | -1.050000 | -2.078731651 | -24.458526970 | 6.271017583   | 1 | 1 | 0 | # | ob  |
| 978  | 6 | 3 | -1.050000 | -0.981894487 | -27.228199320 | 10.366131378  | 1 | 1 | 0 | # | ob  |
| 979  | 6 | 3 | -1.050000 | -5.023189092 | -22.594160300 | 12.565579711  | 1 | 1 | 0 | # | ob  |
| 980  | 6 | 3 | -1.050000 | -1.607035345 | -22.777048519 | 8.299077932   | 1 | 1 | 0 | # | ob  |
| 981  | 6 | 3 | -1.050000 | -2.741532736 | -27.058553874 | 6.100653738   | 1 | 1 | 0 | # | ob  |
| 982  | 6 | 7 | 2.100000  | -0.953702986 | -27.381980796 | 11.995277170  | 1 | 1 | 0 | # | st  |
| 983  | 6 | 7 | 2.100000  | -1.634672226 | -22.935729218 | 6.670701903   | 1 | 1 | 0 | # | st  |
| 984  | 6 | 7 | 2.100000  | -4.22997014  | -21.527119204 | 6.669722830   | 1 | 1 | 0 | # | st  |
| 985  | 6 | 7 | 2.100000  | -1.634647014 | -25.981669204 | 6.669722830   | 1 | 1 | 0 | # | st  |
| 986  | 6 | 7 | 2.100000  | -0.953677774 | -21.518820782 | 11.994298097  | 1 | 1 | 0 | # | st  |
| 987  | 6 | 7 | 2.100000  | -3.542027774 | -25.973370782 | 11.994298097  | 1 | 1 | 0 | # | st  |
| 988  | 6 | 7 | 2.100000  | -3.542052986 | -22.927430796 | 11.995277170  | 1 | 1 | 0 | # | st  |
| 989  | 6 | 7 | 2.100000  | -4.223022226 | -27.390279218 | 6.670701903   | 1 | 1 | 0 | # | st  |
| 990  | 6 | 5 | -0.950000 | -0.439233573 | -19.680858114 | -16.076279050 | 1 | 1 | 1 | # | oht |
| 991  | 6 | 5 | -0.950000 | -4.871761797 | -0.272172439  | 15.863272887  | 1 | 0 | 0 | # | oht |
| 992  | 6 | 2 | 0.425000  | -5.220127747 | -1.308055357  | 15.669139507  | 1 | 0 | 0 | # | ho  |
| 993  | 6 | 2 | 0.425000  | -0.176711381 | -1.054326608  | -15.567929463 | 1 | 0 | 1 | # | ho  |
| 994  | 6 | 2 | 0.425000  | -0.312851036 | -18.596754758 | -16.278386456 | 1 | 1 | 1 | # | ho  |
| 995  | 6 | 2 | 0.425000  | -5.063651085 | -19.012312375 | 15.301136949  | 1 | 1 | 0 | # | ho  |
| 996  | 7 | 1 | 1.575000  | 2.588555029  | 1.474661568   | -18.664729368 | 0 | 0 | 1 | # | ao  |
| 997  | 7 | 1 | 1.575000  | 0.000205029  | 5.929211568   | -18.664729368 | 0 | 0 | 1 | # | ao  |
| 998  | 7 | 1 | 1.575000  | 2.588144971  | 7.434438432   | 18.664729368  | 0 | 0 | 0 | # | ao  |
| 999  | 7 | 1 | 1.575000  | 5.176494971  | 2.979888432   | 18.664729368  | 0 | 0 | 0 | # | ao  |
| 1000 | 7 | 2 | 0.425000  | 3.734650872  | 4.457267322   | -17.178884937 | 0 | 0 | 1 | # | ho  |
| 1001 | 7 | 2 | 0.425000  | 1.146300872  | 0.002717322   | -17.178884937 | 0 | 0 | 1 | # | ho  |
| 1002 | 7 | 2 | 0.425000  | 1.442049128  | 4.451832678   | 17.178884937  | 0 | 0 | 0 | # | ho  |
| 1003 | 7 | 2 | 0.425000  | 4.030399128  | 8.906382678   | 17.178884937  | 0 | 0 | 0 | # | ho  |
| 1004 | 7 | 3 | -1.050000 | 0.981314655  | 1.677501481   | 17.631577932  | 0 | 0 | 0 | # | ob  |
| 1005 | 7 | 3 | -1.050000 | 5.023517264  | 6.305096126   | 15.433153738  | 0 | 0 | 0 | # | ob  |
| 1006 | 7 | 3 | -1.050000 | 3.570244487  | 2.773649320   | 17.631368622  | 0 | 0 | 0 | # | ob  |
| 1007 | 7 | 3 | -1.050000 | 2.434839092  | 7.048710300   | 15.431920289  | 0 | 0 | 0 | # | ob  |
| 1008 | 7 | 3 | -1.050000 | 0.981894487  | 7.228199320   | 17.631368622  | 0 | 0 | 0 | # | ob  |
| 1009 | 7 | 3 | -1.050000 | 1.606455513  | 6.135450680   | -17.631368622 | 0 | 0 | 1 | # | ob  |
| 1010 | 7 | 3 | -1.050000 | 5.023189092  | 2.594160300   | 15.431920289  | 0 | 0 | 0 | # | ob  |
| 1011 | 7 | 3 | -1.050000 | 1.607035345  | 2.777048519   | -17.631577932 | 0 | 0 | 1 | # | ob  |
| 1012 | 7 | 3 | -1.050000 | 2.741532736  | 7.058553874   | -15.433153738 | 0 | 0 | 1 | # | ob  |
| 1013 | 7 | 3 | -1.050000 | 4.195385345  | 7.231598519   | -17.631577932 | 0 | 0 | 1 | # | ob  |
| 1014 | 7 | 3 | -1.050000 | 0.153182736  | 2.604003874   | -15.433153738 | 0 | 0 | 1 | # | ob  |
| 1015 | 7 | 3 | -1.050000 | 2.741860908  | 1.860389700   | -15.431920289 | 0 | 0 | 1 | # | ob  |
| 1016 | 7 | 4 | -0.950000 | 1.999257657  | 0.000940996   | -17.652417115 | 0 | 0 | 1 | # | oho |
| 1017 | 7 | 5 | -0.950000 | 4.667081651  | 0.003976970   | -15.603517583 | 0 | 0 | 1 | # | oht |
| 1018 | 7 | 6 | -0.950000 | 4.587607657  | 4.455490996   | -17.652417115 | 0 | 0 | 1 | # | oh  |
| 1019 | 7 | 3 | -1.050000 | 2.078731651  | 4.458526970   | -15.603517583 | 0 | 0 | 1 | # | ob  |
| 1020 | 7 | 6 | -0.950000 | 3.177442343  | 8.908159004   | 17.652417115  | 0 | 0 | 0 | # | oh  |
| 1021 | 7 | 3 | -1.050000 | 0.509618349  | 8.905123030   | 15.603517583  | 0 | 0 | 0 | # | ob  |
| 1022 | 7 | 6 | -0.950000 | 0.589092343  | 4.453609004   | 17.652417115  | 0 | 0 | 0 | # | oh  |
| 1023 | 7 | 3 | -1.050000 | 3.097968349  | 4.450573030   | 15.603517583  | 0 | 0 | 0 | # | ob  |
| 1024 | 7 | 3 | -1.050000 | 4.194805513  | 1.680900680   | -17.631368622 | 0 | 0 | 1 | # | ob  |
| 1025 | 7 | 3 | -1.050000 | 0.153510908  | 6.314939700   | -15.431920289 | 0 | 0 | 1 | # | ob  |
| 1026 | 7 | 3 | -1.050000 | 3.569664655  | 6.132051481   | 17.631577932  | 0 | 0 | 0 | # | ob  |
| 1027 | 7 | 3 | -1.050000 | 2.435167264  | 1.850546126   | 15.433153738  | 0 | 0 | 0 | # | ob  |
| 1028 | 7 | 7 | 2.100000  | 4.222997014  | 1.527119204   | -16.002222830 | 0 | 0 | 1 | # | st  |
| 1029 | 7 | 7 | 2.100000  | 3.542027774  | 5.973370782   | 16.003201903  | 0 | 0 | 0 | # | st  |
| 1030 | 7 | 7 | 2.100000  | 0.953702986  | 7.381980796   | 16.002222830  | 0 | 0 | 0 | # | st  |
| 1031 | 7 | 7 | 2.100000  | 3.542052986  | 2.927430796   | 16.002222830  | 0 | 0 | 0 | # | st  |
| 1032 | 7 | 7 | 2.100000  | 4.223022226  | 7.390279218   | -16.003201903 | 0 | 0 | 1 | # | st  |
| 1033 | 7 | 7 | 2.100000  | 1.634672226  | 2.935729218   | -16.003201903 | 0 | 0 | 1 | # | st  |
| 1034 | 7 | 7 | 2.100000  | 1.634647014  | 5.981669204   | -16.002222830 | 0 | 0 | 1 | # | st  |
| 1035 | 7 | 7 | 2.100000  | 0.953677774  | 1.518820782   | 16.003201903  | 0 | 0 | 0 | # | st  |
| 1036 | 7 | 1 | 1.575000  | 2.588555029  | 10.383761568  | -18.664729368 | 0 | 0 | 1 | # | ao  |
| 1037 | 7 | 1 | 1.575000  | 0.000205029  | 14.838311568  | -18.664729368 | 0 | 0 | 1 | # | ao  |
| 1038 | 7 | 1 | 1.575000  | 2.588144971  | 16.343538432  | 18.664729368  | 0 | 0 | 0 | # | ao  |
| 1039 | 7 | 1 | 1.575000  | 5.176494971  | 11.888988432  | 18.664729368  | 0 | 0 | 0 | # | ao  |
| 1040 | 7 | 2 | 0.425000  | 3.734650872  | 13.366367322  | -17.178884937 | 0 | 0 | 1 | # | ho  |
| 1041 | 7 | 2 | 0.425000  | 1.146300872  | 8.911817322   | -17.178884937 | 0 | 0 | 1 | # | ho  |
| 1042 | 7 | 2 | 0.425000  | 1.442049128  | 13.360932678  | 17.178884937  | 0 | 0 | 0 | # | ho  |
| 1043 | 7 | 2 | 0.425000  | 4.030399128  | 17.815482678  | 17.178884937  | 0 | 0 | 0 | # | ho  |
| 1044 | 7 | 3 | -1.050000 | 0.981314655  | 10.586601481  | 17.631577932  | 0 | 0 | 0 | # | ob  |
| 1045 | 7 | 3 | -1.050000 | 5.023517264  | 15.214196126  | 15.433153738  | 0 | 0 | 0 | # | ob  |
| 1046 | 7 | 3 | -1.050000 | 3.570244487  | 11.682749320  | 17.631368622  | 0 | 0 | 0 | # | ob  |
| 1047 | 7 | 3 | -1.050000 | 2.434839092  | 15.957810300  | 15.431920289  | 0 | 0 | 0 | # | ob  |
| 1048 | 7 | 3 | -1.050000 | 0.981894487  | 16.137299320  | 17.631368622  | 0 | 0 | 0 | # | ob  |
| 1049 | 7 | 3 | -1.050000 | 1.606455513  | 15.044550680  | -17.631368622 | 0 | 0 | 1 | # | ob  |
| 1050 | 7 | 3 | -1.050000 | 5.023189092  | 11.503260300  | 15.431920289  | 0 | 0 | 0 | # | ob  |
| 1051 | 7 | 3 | -1.050000 | 1.607035345  | 11.686148519  | -17.631577932 | 0 | 0 | 1 | # | ob  |
| 1052 | 7 | 3 | -1.050000 | 2.741532736  | 15.967653874  | -15.433153738 | 0 | 0 | 1 | # | ob  |

|      |   |   |           |             |               |               |   |   |   |   |     |
|------|---|---|-----------|-------------|---------------|---------------|---|---|---|---|-----|
| 1053 | 7 | 3 | -1.050000 | 4.195385345 | 16.140698519  | -17.631577932 | 0 | 0 | 1 | # | ob  |
| 1054 | 7 | 3 | -1.050000 | 0.153182736 | 11.513103874  | -15.433153738 | 0 | 0 | 1 | # | ob  |
| 1055 | 7 | 3 | -1.050000 | 2.741860908 | 10.769489700  | -15.431920289 | 0 | 0 | 1 | # | ob  |
| 1056 | 7 | 6 | -0.950000 | 1.999257657 | 8.910040996   | -17.652417115 | 0 | 0 | 1 | # | oh  |
| 1057 | 7 | 3 | -1.050000 | 4.667081651 | 8.913076970   | -15.603517583 | 0 | 0 | 1 | # | ob  |
| 1058 | 7 | 6 | -0.950000 | 4.587607657 | 13.364590996  | -17.652417115 | 0 | 0 | 1 | # | oh  |
| 1059 | 7 | 3 | -1.050000 | 2.078731651 | 13.367626970  | -15.603517583 | 0 | 0 | 1 | # | ob  |
| 1060 | 7 | 6 | -0.950000 | 3.177442343 | 17.817259004  | 17.652417115  | 0 | 0 | 0 | # | oh  |
| 1061 | 7 | 3 | -1.050000 | 0.509618349 | 17.814223030  | 15.603517583  | 0 | 0 | 0 | # | ob  |
| 1062 | 7 | 6 | -0.950000 | 0.589092343 | 13.362709004  | 17.652417115  | 0 | 0 | 0 | # | oh  |
| 1063 | 7 | 3 | -1.050000 | 3.097968349 | 13.359673030  | 15.603517583  | 0 | 0 | 0 | # | ob  |
| 1064 | 7 | 3 | -1.050000 | 4.194805513 | 10.590000680  | -17.631368622 | 0 | 0 | 1 | # | ob  |
| 1065 | 7 | 3 | -1.050000 | 0.153510908 | 15.224039700  | -15.431920289 | 0 | 0 | 1 | # | ob  |
| 1066 | 7 | 3 | -1.050000 | 3.569664655 | 15.041151481  | 17.631577932  | 0 | 0 | 0 | # | ob  |
| 1067 | 7 | 3 | -1.050000 | 2.435167264 | 10.759646126  | 15.433153738  | 0 | 0 | 0 | # | ob  |
| 1068 | 7 | 7 | 2.100000  | 4.222997014 | 10.436219204  | -16.002222830 | 0 | 0 | 1 | # | st  |
| 1069 | 7 | 7 | 2.100000  | 3.542027774 | 14.882470782  | 16.003201903  | 0 | 0 | 0 | # | st  |
| 1070 | 7 | 7 | 2.100000  | 0.953702986 | 16.291080796  | 16.002222830  | 0 | 0 | 0 | # | st  |
| 1071 | 7 | 7 | 2.100000  | 3.542052986 | 11.836530796  | 16.002222830  | 0 | 0 | 0 | # | st  |
| 1072 | 7 | 7 | 2.100000  | 4.223022226 | 16.299379218  | -16.003201903 | 0 | 0 | 1 | # | st  |
| 1073 | 7 | 7 | 2.100000  | 1.634672226 | 11.844829218  | -16.003201903 | 0 | 0 | 1 | # | st  |
| 1074 | 7 | 7 | 2.100000  | 1.634647014 | 14.890769204  | -16.002222830 | 0 | 0 | 1 | # | st  |
| 1075 | 7 | 7 | 2.100000  | 0.953677774 | 10.427920782  | 16.003201903  | 0 | 0 | 0 | # | st  |
| 1076 | 7 | 1 | 1.575000  | 2.588555029 | 19.292861568  | -18.664729368 | 0 | 0 | 1 | # | ao  |
| 1077 | 7 | 1 | 1.575000  | 0.000205029 | 23.747411568  | -18.664729368 | 0 | 0 | 1 | # | ao  |
| 1078 | 7 | 1 | 1.575000  | 2.588144971 | 25.252638432  | 18.664729368  | 0 | 0 | 0 | # | ao  |
| 1079 | 7 | 1 | 1.575000  | 5.176494971 | 20.798088432  | 18.664729368  | 0 | 0 | 0 | # | ao  |
| 1080 | 7 | 2 | 0.425000  | 3.734650872 | 22.275467322  | -17.178884937 | 0 | 0 | 1 | # | ho  |
| 1081 | 7 | 2 | 0.425000  | 1.146300872 | 17.820917322  | -17.178884937 | 0 | 0 | 1 | # | ho  |
| 1082 | 7 | 2 | 0.425000  | 1.442049128 | 22.270032678  | 17.178884937  | 0 | 0 | 0 | # | ho  |
| 1083 | 7 | 2 | 0.425000  | 4.030399128 | 26.724582678  | 17.178884937  | 0 | 0 | 0 | # | ho  |
| 1084 | 7 | 3 | -1.050000 | 0.981314655 | 19.495701481  | 17.631577932  | 0 | 0 | 0 | # | ob  |
| 1085 | 7 | 3 | -1.050000 | 5.023517264 | 24.123296126  | 15.433153738  | 0 | 0 | 0 | # | ob  |
| 1086 | 7 | 3 | -1.050000 | 3.570244487 | 20.591849320  | 17.631368622  | 0 | 0 | 0 | # | ob  |
| 1087 | 7 | 3 | -1.050000 | 2.434839092 | 24.866910300  | 15.431920289  | 0 | 0 | 0 | # | ob  |
| 1088 | 7 | 3 | -1.050000 | 0.981894487 | 25.046399320  | 17.631368622  | 0 | 0 | 0 | # | ob  |
| 1089 | 7 | 3 | -1.050000 | 1.606455513 | 23.953650680  | -17.631368622 | 0 | 0 | 1 | # | ob  |
| 1090 | 7 | 3 | -1.050000 | 5.023189092 | 20.412360300  | 15.431920289  | 0 | 0 | 0 | # | ob  |
| 1091 | 7 | 3 | -1.050000 | 1.607035345 | 20.595248519  | -17.631577932 | 0 | 0 | 1 | # | ob  |
| 1092 | 7 | 3 | -1.050000 | 2.741532736 | 24.876753874  | -15.433153738 | 0 | 0 | 1 | # | ob  |
| 1093 | 7 | 3 | -1.050000 | 4.195385345 | 25.049798519  | -17.631577932 | 0 | 0 | 1 | # | ob  |
| 1094 | 7 | 3 | -1.050000 | 0.153182736 | 20.422203874  | -15.433153738 | 0 | 0 | 1 | # | ob  |
| 1095 | 7 | 3 | -1.050000 | 2.741860908 | 19.678589700  | -15.431920289 | 0 | 0 | 1 | # | ob  |
| 1096 | 7 | 6 | -0.950000 | 1.999257657 | 17.819140996  | -17.652417115 | 0 | 0 | 1 | # | oh  |
| 1097 | 7 | 3 | -1.050000 | 4.667081651 | 17.822176970  | -15.603517583 | 0 | 0 | 1 | # | ob  |
| 1098 | 7 | 6 | -0.950000 | 4.587607657 | 22.273690996  | -17.652417115 | 0 | 0 | 1 | # | oh  |
| 1099 | 7 | 3 | -1.050000 | 2.078731651 | 22.276726970  | -15.603517583 | 0 | 0 | 1 | # | ob  |
| 1100 | 7 | 6 | -0.950000 | 3.177442343 | 26.726359004  | 17.652417115  | 0 | 0 | 0 | # | oh  |
| 1101 | 7 | 3 | -1.050000 | 0.509618349 | 26.723323030  | 15.603517583  | 0 | 0 | 0 | # | ob  |
| 1102 | 7 | 6 | -0.950000 | 0.589092343 | 22.271809004  | 17.652417115  | 0 | 0 | 0 | # | oh  |
| 1103 | 7 | 3 | -1.050000 | 3.097968349 | 22.268773030  | 15.603517583  | 0 | 0 | 0 | # | ob  |
| 1104 | 7 | 3 | -1.050000 | 4.194805513 | 19.499100680  | -17.631368622 | 0 | 0 | 1 | # | ob  |
| 1105 | 7 | 3 | -1.050000 | 0.153510908 | 24.133139700  | -15.431920289 | 0 | 0 | 1 | # | ob  |
| 1106 | 7 | 3 | -1.050000 | 3.569664655 | 23.950251481  | 17.631577932  | 0 | 0 | 0 | # | ob  |
| 1107 | 7 | 3 | -1.050000 | 2.435167264 | 19.668746126  | 15.433153738  | 0 | 0 | 0 | # | ob  |
| 1108 | 7 | 7 | 2.100000  | 4.222997014 | 19.345319204  | -16.002222830 | 0 | 0 | 1 | # | st  |
| 1109 | 7 | 7 | 2.100000  | 3.542027774 | 23.791570782  | 16.003201903  | 0 | 0 | 0 | # | st  |
| 1110 | 7 | 7 | 2.100000  | 0.953702986 | 25.200180796  | 16.002222830  | 0 | 0 | 0 | # | st  |
| 1111 | 7 | 7 | 2.100000  | 3.542052986 | 20.745630796  | 16.002222830  | 0 | 0 | 0 | # | st  |
| 1112 | 7 | 7 | 2.100000  | 4.223022226 | 25.208479218  | -16.003201903 | 0 | 0 | 1 | # | st  |
| 1113 | 7 | 7 | 2.100000  | 1.634672226 | 20.753929218  | -16.003201903 | 0 | 0 | 1 | # | st  |
| 1114 | 7 | 7 | 2.100000  | 1.634647014 | 23.799869204  | -16.002222830 | 0 | 0 | 1 | # | st  |
| 1115 | 7 | 7 | 2.100000  | 0.953677774 | 19.337020782  | 16.003201903  | 0 | 0 | 0 | # | st  |
| 1116 | 7 | 1 | 1.575000  | 2.588555029 | -27.434438432 | -18.664729368 | 0 | 1 | 1 | # | ao  |
| 1117 | 7 | 1 | 1.575000  | 0.000205029 | -22.979888432 | -18.664729368 | 0 | 1 | 1 | # | ao  |
| 1118 | 7 | 1 | 1.575000  | 2.588144971 | -21.474661568 | 18.664729368  | 0 | 0 | 0 | # | ao  |
| 1119 | 7 | 1 | 1.575000  | 5.176494971 | -25.929211568 | 18.664729368  | 0 | 0 | 0 | # | ao  |
| 1120 | 7 | 2 | 0.425000  | 3.734650872 | -24.451832678 | -17.178884937 | 0 | 1 | 1 | # | ho  |
| 1121 | 7 | 2 | 0.425000  | 1.146300872 | 26.730017322  | -17.178884937 | 0 | 0 | 1 | # | ho  |
| 1122 | 7 | 2 | 0.425000  | 1.442049128 | -24.457267322 | 17.178884937  | 0 | 0 | 0 | # | ho  |
| 1123 | 7 | 2 | 0.425000  | 4.030399128 | -20.002717322 | 17.178884937  | 0 | 1 | 0 | # | ho  |
| 1124 | 7 | 3 | -1.050000 | 0.981314655 | -27.231598519 | 17.631577932  | 0 | 1 | 0 | # | ob  |
| 1125 | 7 | 3 | -1.050000 | 5.023517264 | -22.604003874 | 15.433153738  | 0 | 1 | 0 | # | ob  |
| 1126 | 7 | 3 | -1.050000 | 3.570244487 | -26.135450680 | 17.631368622  | 0 | 1 | 0 | # | ob  |
| 1127 | 7 | 3 | -1.050000 | 2.434839092 | -21.860389700 | 15.431920289  | 0 | 1 | 0 | # | ob  |
| 1128 | 7 | 3 | -1.050000 | 0.981894487 | -21.680900680 | 17.631368622  | 0 | 1 | 0 | # | ob  |
| 1129 | 7 | 3 | -1.050000 | 1.606455513 | -22.773649320 | -17.631368622 | 0 | 1 | 1 | # | ob  |
| 1130 | 7 | 3 | -1.050000 | 5.023189092 | -26.314939700 | 15.431920289  | 0 | 1 | 0 | # | ob  |
| 1131 | 7 | 3 | -1.050000 | 1.607035345 | -26.132051481 | -17.631577932 | 0 | 1 | 1 | # | ob  |
| 1132 | 7 | 3 | -1.050000 | 2.741532736 | -21.850546126 | -15.433153738 | 0 | 1 | 1 | # | ob  |
| 1133 | 7 | 3 | -1.050000 | 4.195385345 | -21.677501481 | -17.631577932 | 0 | 1 | 1 | # | ob  |
| 1134 | 7 | 3 | -1.050000 | 0.153182736 | -26.305096126 | -15.433153738 | 0 | 1 | 1 | # | ob  |
| 1135 | 7 | 3 | -1.050000 | 2.741860908 | -27.048710300 | -15.431920289 | 0 | 1 | 1 | # | ob  |
| 1136 | 7 | 6 | -0.950000 | 1.999257657 | 26.728240996  | -17.652417115 | 0 | 0 | 1 | # | oh  |
| 1137 | 7 | 3 | -1.050000 | 4.667081651 | 26.731276970  | -15.603517583 | 0 | 0 | 1 | # | ob  |
| 1138 | 7 | 6 | -0.950000 | 4.587607657 | -24.453609004 | -17.652417115 | 0 | 1 | 1 | # | oh  |
| 1139 | 7 | 3 | -1.050000 | 2.078731651 | -24.450573030 | -15.603517583 | 0 | 1 | 1 | # | ob  |
| 1140 | 7 | 4 | -0.950000 | 3.177442343 | -20.000940996 | 17.652417115  | 0 | 1 | 0 | # | oh  |
| 1141 | 7 | 5 | -0.950000 | 0.509618349 | -20.003976970 | 15.603517583  | 0 | 1 | 0 | # | oht |
| 1142 | 7 | 6 | -0.950000 | 0.589092343 | -24.455490996 | 17.652417115  | 0 | 1 | 0 | # | oh  |
| 1143 | 7 | 3 | -1.050000 | 3.097968349 | -24.458526970 | 15.603517583  | 0 | 1 | 0 | # | ob  |
| 1144 | 7 | 3 | -1.050000 | 4.194805513 | -27.228199320 | -17.631368622 | 0 | 1 | 1 | # | ob  |
| 1145 | 7 | 3 | -1.050000 | 0.153510908 | -22.594160300 | -15.431920289 | 0 | 1 | 1 | # | ob  |

|      |   |   |           |              |               |               |   |   |   |   |     |
|------|---|---|-----------|--------------|---------------|---------------|---|---|---|---|-----|
| 1146 | 7 | 3 | -1.050000 | 3.569664655  | -22.777048519 | 17.631577932  | 0 | 1 | 0 | # | ob  |
| 1147 | 7 | 3 | -1.050000 | 2.435167264  | -27.058553874 | 15.433153738  | 0 | 1 | 0 | # | ob  |
| 1148 | 7 | 7 | 2.100000  | 4.222997014  | -27.381980796 | -16.002222830 | 0 | 1 | 1 | # | st  |
| 1149 | 7 | 7 | 2.100000  | 3.542027774  | -22.935729218 | 16.003201903  | 0 | 1 | 0 | # | st  |
| 1150 | 7 | 7 | 2.100000  | 0.953702986  | -21.527119204 | 16.002222830  | 0 | 1 | 0 | # | st  |
| 1151 | 7 | 7 | 2.100000  | 3.542052986  | -25.981669204 | 16.002222830  | 0 | 1 | 0 | # | st  |
| 1152 | 7 | 7 | 2.100000  | 4.223022226  | -21.518820782 | -16.003201903 | 0 | 1 | 1 | # | st  |
| 1153 | 7 | 7 | 2.100000  | 1.634672226  | -25.973370782 | -16.003201903 | 0 | 1 | 1 | # | st  |
| 1154 | 7 | 7 | 2.100000  | 1.634647014  | -22.927430796 | -16.002222830 | 0 | 1 | 1 | # | st  |
| 1155 | 7 | 7 | 2.100000  | 0.953677774  | -27.390279218 | 16.003201903  | 0 | 1 | 0 | # | st  |
| 1156 | 7 | 5 | -0.950000 | 4.737466427  | -19.680858114 | -6.743779050  | 0 | 1 | 1 | # | oht |
| 1157 | 7 | 5 | -0.950000 | 0.304938203  | -0.272172439  | -12.134227113 | 0 | 0 | 1 | # | oht |
| 1158 | 7 | 2 | 0.425000  | 4.999988619  | -1.054326608  | -6.235429463  | 0 | 0 | 1 | # | ho  |
| 1159 | 7 | 2 | 0.425000  | 4.863848964  | -18.596754758 | -6.945886456  | 0 | 1 | 1 | # | ho  |
| 1160 | 7 | 2 | 0.425000  | 0.113048915  | -19.012312375 | -12.696363051 | 0 | 1 | 1 | # | ho  |
| 1161 | 8 | 1 | 1.575000  | 7.765255029  | 1.474661568   | -18.664729368 | 0 | 0 | 1 | # | ao  |
| 1162 | 8 | 1 | 1.575000  | 5.176905029  | 5.929211568   | -18.664729368 | 0 | 0 | 1 | # | ao  |
| 1163 | 8 | 1 | 1.575000  | 7.764844971  | 7.434438432   | 18.664729368  | 0 | 0 | 0 | # | ao  |
| 1164 | 8 | 1 | 1.575000  | 10.353194971 | 2.979888432   | 18.664729368  | 0 | 0 | 0 | # | ao  |
| 1165 | 8 | 2 | 0.425000  | 8.911350872  | 4.457267322   | -17.178884937 | 0 | 0 | 1 | # | ho  |
| 1166 | 8 | 2 | 0.425000  | 6.323000872  | 0.002717322   | -17.178884937 | 0 | 0 | 1 | # | ho  |
| 1167 | 8 | 2 | 0.425000  | 6.618749128  | 4.451832678   | 17.178884937  | 0 | 0 | 0 | # | ho  |
| 1168 | 8 | 2 | 0.425000  | 9.207099128  | 8.906382678   | 17.178884937  | 0 | 0 | 0 | # | ho  |
| 1169 | 8 | 3 | -1.050000 | 6.158014655  | 1.677501481   | 17.631577932  | 0 | 0 | 0 | # | ob  |
| 1170 | 8 | 3 | -1.050000 | 10.200217264 | 6.305096126   | 15.433153738  | 0 | 0 | 0 | # | ob  |
| 1171 | 8 | 3 | -1.050000 | 8.746944487  | 2.773649320   | 17.631368622  | 0 | 0 | 0 | # | ob  |
| 1172 | 8 | 3 | -1.050000 | 7.611539092  | 7.048710300   | 15.431920289  | 0 | 0 | 0 | # | ob  |
| 1173 | 8 | 3 | -1.050000 | 6.158594487  | 7.228199320   | 17.631368622  | 0 | 0 | 0 | # | ob  |
| 1174 | 8 | 3 | -1.050000 | 6.783155513  | 6.135450680   | -17.631368622 | 0 | 0 | 1 | # | ob  |
| 1175 | 8 | 3 | -1.050000 | 10.199899092 | 2.594160300   | 15.431920289  | 0 | 0 | 0 | # | ob  |
| 1176 | 8 | 3 | -1.050000 | 6.783735345  | 2.777048519   | -17.631577932 | 0 | 0 | 1 | # | ob  |
| 1177 | 8 | 3 | -1.050000 | 7.918232736  | 7.058553874   | -15.433153738 | 0 | 0 | 1 | # | ob  |
| 1178 | 8 | 3 | -1.050000 | 9.372085345  | 7.231598519   | -17.631577932 | 0 | 0 | 1 | # | ob  |
| 1179 | 8 | 3 | -1.050000 | 5.329882736  | 2.604003874   | -15.433153738 | 0 | 0 | 1 | # | ob  |
| 1180 | 8 | 3 | -1.050000 | 7.918560908  | 1.860389700   | -15.431920289 | 0 | 0 | 1 | # | ob  |
| 1181 | 8 | 4 | -0.950000 | 7.175957657  | 0.000940996   | -17.652417115 | 0 | 0 | 1 | # | oho |
| 1182 | 8 | 5 | -0.950000 | 9.843781651  | 0.003976970   | -15.603517583 | 0 | 0 | 1 | # | oht |
| 1183 | 8 | 6 | -0.950000 | 9.764307657  | 4.455490996   | -17.652417115 | 0 | 0 | 1 | # | oh  |
| 1184 | 8 | 3 | -1.050000 | 7.255431651  | 4.458526970   | -15.603517583 | 0 | 0 | 1 | # | ob  |
| 1185 | 8 | 6 | -0.950000 | 8.354142343  | 8.908159004   | 17.652417115  | 0 | 0 | 0 | # | oh  |
| 1186 | 8 | 3 | -1.050000 | 5.686318349  | 8.905123030   | 15.603517583  | 0 | 0 | 0 | # | ob  |
| 1187 | 8 | 6 | -0.950000 | 5.765792343  | 4.453609004   | 17.652417115  | 0 | 0 | 0 | # | oh  |
| 1188 | 8 | 3 | -1.050000 | 8.274668349  | 4.450573030   | 15.603517583  | 0 | 0 | 0 | # | ob  |
| 1189 | 8 | 3 | -1.050000 | 9.371505513  | 1.680900680   | -17.631368622 | 0 | 0 | 1 | # | ob  |
| 1190 | 8 | 3 | -1.050000 | 5.330210908  | 6.314939700   | -15.431920289 | 0 | 0 | 1 | # | ob  |
| 1191 | 8 | 3 | -1.050000 | 8.746364655  | 6.132051481   | 17.631577932  | 0 | 0 | 0 | # | ob  |
| 1192 | 8 | 3 | -1.050000 | 7.611867264  | 1.850546126   | 15.433153738  | 0 | 0 | 0 | # | ob  |
| 1193 | 8 | 7 | 2.100000  | 9.399697014  | 1.527119204   | -16.002222830 | 0 | 0 | 1 | # | st  |
| 1194 | 8 | 7 | 2.100000  | 8.718727774  | 5.973370782   | 16.003201903  | 0 | 0 | 0 | # | st  |
| 1195 | 8 | 7 | 2.100000  | 6.130402986  | 7.381980796   | 16.002222830  | 0 | 0 | 0 | # | st  |
| 1196 | 8 | 7 | 2.100000  | 8.718752986  | 2.927430796   | 16.002222830  | 0 | 0 | 0 | # | st  |
| 1197 | 8 | 7 | 2.100000  | 9.399722226  | 7.390279218   | -16.003201903 | 0 | 0 | 1 | # | st  |
| 1198 | 8 | 7 | 2.100000  | 6.811372226  | 2.935729218   | -16.003201903 | 0 | 0 | 1 | # | st  |
| 1199 | 8 | 7 | 2.100000  | 6.811347014  | 5.981669204   | -16.002222830 | 0 | 0 | 1 | # | st  |
| 1200 | 8 | 7 | 2.100000  | 6.130377774  | 1.518820782   | 16.003201903  | 0 | 0 | 0 | # | st  |
| 1201 | 8 | 1 | 1.575000  | 7.765255029  | 10.383761568  | -18.664729368 | 0 | 0 | 1 | # | ao  |
| 1202 | 8 | 1 | 1.575000  | 5.176905029  | 14.838311568  | -18.664729368 | 0 | 0 | 1 | # | ao  |
| 1203 | 8 | 1 | 1.575000  | 7.764844971  | 16.343538432  | 18.664729368  | 0 | 0 | 0 | # | ao  |
| 1204 | 8 | 1 | 1.575000  | 10.353194971 | 11.888988432  | 18.664729368  | 0 | 0 | 0 | # | ao  |
| 1205 | 8 | 2 | 0.425000  | 8.911350872  | 13.366367322  | -17.178884937 | 0 | 0 | 1 | # | ho  |
| 1206 | 8 | 2 | 0.425000  | 6.323000872  | 8.911817322   | -17.178884937 | 0 | 0 | 1 | # | ho  |
| 1207 | 8 | 2 | 0.425000  | 6.618749128  | 13.360932678  | 17.178884937  | 0 | 0 | 0 | # | ho  |
| 1208 | 8 | 2 | 0.425000  | 9.207099128  | 17.815482678  | 17.178884937  | 0 | 0 | 0 | # | ho  |
| 1209 | 8 | 3 | -1.050000 | 6.158014655  | 10.586601481  | 17.631577932  | 0 | 0 | 0 | # | ob  |
| 1210 | 8 | 3 | -1.050000 | 10.200217264 | 15.214196126  | 15.433153738  | 0 | 0 | 0 | # | ob  |
| 1211 | 8 | 3 | -1.050000 | 8.746944487  | 11.682749320  | 17.631368622  | 0 | 0 | 0 | # | ob  |
| 1212 | 8 | 3 | -1.050000 | 7.611539092  | 15.957810300  | 15.431920289  | 0 | 0 | 0 | # | ob  |
| 1213 | 8 | 3 | -1.050000 | 6.158594487  | 16.137299320  | 17.631368622  | 0 | 0 | 0 | # | ob  |
| 1214 | 8 | 3 | -1.050000 | 6.783155513  | 15.044550680  | -17.631368622 | 0 | 0 | 1 | # | ob  |
| 1215 | 8 | 3 | -1.050000 | 10.199899092 | 11.503260300  | 15.431920289  | 0 | 0 | 0 | # | ob  |
| 1216 | 8 | 3 | -1.050000 | 6.783735345  | 11.686148519  | -17.631577932 | 0 | 0 | 1 | # | ob  |
| 1217 | 8 | 3 | -1.050000 | 7.918232736  | 15.967653874  | -15.433153738 | 0 | 0 | 1 | # | ob  |
| 1218 | 8 | 3 | -1.050000 | 9.372085345  | 16.140698519  | -17.631577932 | 0 | 0 | 1 | # | ob  |
| 1219 | 8 | 3 | -1.050000 | 5.329882736  | 11.513103874  | -15.433153738 | 0 | 0 | 1 | # | ob  |
| 1220 | 8 | 3 | -1.050000 | 7.918560908  | 10.769489700  | -15.431920289 | 0 | 0 | 1 | # | ob  |
| 1221 | 8 | 6 | -0.950000 | 7.175957657  | 8.910040996   | -17.652417115 | 0 | 0 | 1 | # | oh  |
| 1222 | 8 | 3 | -1.050000 | 9.843781651  | 8.913076970   | -15.603517583 | 0 | 0 | 1 | # | ob  |
| 1223 | 8 | 6 | -0.950000 | 9.764307657  | 13.364590996  | -17.652417115 | 0 | 0 | 1 | # | oh  |
| 1224 | 8 | 3 | -1.050000 | 7.255431651  | 13.367626970  | -15.603517583 | 0 | 0 | 1 | # | ob  |
| 1225 | 8 | 6 | -0.950000 | 8.354142343  | 17.817259004  | 17.652417115  | 0 | 0 | 0 | # | oh  |
| 1226 | 8 | 3 | -1.050000 | 5.686318349  | 17.814223030  | 15.603517583  | 0 | 0 | 0 | # | ob  |
| 1227 | 8 | 6 | -0.950000 | 5.765792343  | 13.362709004  | 17.652417115  | 0 | 0 | 0 | # | oh  |
| 1228 | 8 | 3 | -1.050000 | 8.274668349  | 13.359673030  | 15.603517583  | 0 | 0 | 0 | # | ob  |
| 1229 | 8 | 3 | -1.050000 | 9.371505513  | 10.590000680  | -17.631368622 | 0 | 0 | 1 | # | ob  |
| 1230 | 8 | 3 | -1.050000 | 5.330210908  | 15.224039700  | -15.431920289 | 0 | 0 | 1 | # | ob  |
| 1231 | 8 | 3 | -1.050000 | 8.746364655  | 15.041151481  | 17.631577932  | 0 | 0 | 0 | # | ob  |
| 1232 | 8 | 3 | -1.050000 | 7.611867264  | 10.759646126  | 15.433153738  | 0 | 0 | 0 | # | ob  |
| 1233 | 8 | 7 | 2.100000  | 9.399697014  | 10.436219204  | -16.002222830 | 0 | 0 | 1 | # | st  |
| 1234 | 8 | 7 | 2.100000  | 8.718727774  | 14.882470782  | 16.003201903  | 0 | 0 | 0 | # | st  |
| 1235 | 8 | 7 | 2.100000  | 6.130402986  | 16.291080796  | 16.002222830  | 0 | 0 | 0 | # | st  |
| 1236 | 8 | 7 | 2.100000  | 8.718752986  | 11.836530796  | 16.002222830  | 0 | 0 | 0 | # | st  |
| 1237 | 8 | 7 | 2.100000  | 9.399722226  | 16.299379218  | -16.003201903 | 0 | 0 | 1 | # | st  |
| 1238 | 8 | 7 | 2.100000  | 6.811372226  | 11.844829218  | -16.003201903 | 0 | 0 | 1 | # | st  |

|      |   |   |           |              |               |               |   |   |   |   |     |
|------|---|---|-----------|--------------|---------------|---------------|---|---|---|---|-----|
| 1239 | 8 | 7 | 2.100000  | 6.811347014  | 14.890769204  | -16.002222830 | 0 | 0 | 1 | # | st  |
| 1240 | 8 | 7 | 2.100000  | 6.130377774  | 10.427920782  | 16.003201903  | 0 | 0 | 0 | # | st  |
| 1241 | 8 | 1 | 1.575000  | 7.765255029  | 19.292861568  | -18.664729368 | 0 | 0 | 1 | # | ao  |
| 1242 | 8 | 1 | 1.575000  | 5.176905029  | 23.747411568  | -18.664729368 | 0 | 0 | 1 | # | ao  |
| 1243 | 8 | 1 | 1.575000  | 7.764844971  | 25.252638432  | 18.664729368  | 0 | 0 | 0 | # | ao  |
| 1244 | 8 | 1 | 1.575000  | 10.353194971 | 20.798088432  | 18.664729368  | 0 | 0 | 0 | # | ao  |
| 1245 | 8 | 2 | 0.425000  | 8.911350872  | 22.275467322  | -17.178884937 | 0 | 0 | 1 | # | ho  |
| 1246 | 8 | 2 | 0.425000  | 6.323000872  | 17.820917322  | -17.178884937 | 0 | 0 | 1 | # | ho  |
| 1247 | 8 | 2 | 0.425000  | 6.618749128  | 22.270032678  | 17.178884937  | 0 | 0 | 0 | # | ho  |
| 1248 | 8 | 2 | 0.425000  | 9.207099128  | 26.724582678  | 17.178884937  | 0 | 0 | 0 | # | ho  |
| 1249 | 8 | 3 | -1.050000 | 6.158014655  | 19.495701481  | 17.631577932  | 0 | 0 | 0 | # | ob  |
| 1250 | 8 | 3 | -1.050000 | 10.200217264 | 24.123296126  | 15.433153738  | 0 | 0 | 0 | # | ob  |
| 1251 | 8 | 3 | -1.050000 | 8.746944487  | 20.591849320  | 17.631368622  | 0 | 0 | 0 | # | ob  |
| 1252 | 8 | 3 | -1.050000 | 7.611539092  | 24.866910300  | 15.431920289  | 0 | 0 | 0 | # | ob  |
| 1253 | 8 | 3 | -1.050000 | 6.158594487  | 25.046399320  | 17.631368622  | 0 | 0 | 0 | # | ob  |
| 1254 | 8 | 3 | -1.050000 | 6.783155513  | 23.953650680  | -17.631368622 | 0 | 0 | 1 | # | ob  |
| 1255 | 8 | 3 | -1.050000 | 10.199889092 | 20.412360300  | 15.431920289  | 0 | 0 | 0 | # | ob  |
| 1256 | 8 | 3 | -1.050000 | 6.783735345  | 20.595248519  | -17.631577932 | 0 | 0 | 1 | # | ob  |
| 1257 | 8 | 3 | -1.050000 | 7.918232736  | 24.876753874  | -15.433153738 | 0 | 0 | 1 | # | ob  |
| 1258 | 8 | 3 | -1.050000 | 9.372085345  | 25.049798519  | -17.631577932 | 0 | 0 | 1 | # | ob  |
| 1259 | 8 | 3 | -1.050000 | 5.329882736  | 20.422203874  | -15.433153738 | 0 | 0 | 1 | # | ob  |
| 1260 | 8 | 3 | -1.050000 | 7.918560908  | 19.678589700  | -15.431920289 | 0 | 0 | 1 | # | ob  |
| 1261 | 8 | 6 | -0.950000 | 7.175957657  | 17.819140996  | -17.652417115 | 0 | 0 | 1 | # | oh  |
| 1262 | 8 | 3 | -1.050000 | 9.843781651  | 17.822176970  | -15.603517583 | 0 | 0 | 1 | # | ob  |
| 1263 | 8 | 6 | -0.950000 | 9.764307657  | 22.273690996  | -17.652417115 | 0 | 0 | 1 | # | oh  |
| 1264 | 8 | 3 | -1.050000 | 7.255431651  | 22.276726970  | -15.603517583 | 0 | 0 | 1 | # | ob  |
| 1265 | 8 | 6 | -0.950000 | 8.354142343  | 26.726359004  | 17.652417115  | 0 | 0 | 0 | # | oh  |
| 1266 | 8 | 3 | -1.050000 | 5.686318349  | 26.723323030  | 15.603517583  | 0 | 0 | 0 | # | ob  |
| 1267 | 8 | 6 | -0.950000 | 5.765792343  | 22.271809004  | 17.652417115  | 0 | 0 | 0 | # | oh  |
| 1268 | 8 | 3 | -1.050000 | 8.274668349  | 22.268773030  | 15.603517583  | 0 | 0 | 0 | # | ob  |
| 1269 | 8 | 3 | -1.050000 | 9.371505513  | 19.499100680  | -17.631368622 | 0 | 0 | 1 | # | ob  |
| 1270 | 8 | 3 | -1.050000 | 5.330210908  | 24.133139700  | -15.431920289 | 0 | 0 | 1 | # | ob  |
| 1271 | 8 | 3 | -1.050000 | 8.746364655  | 23.950251481  | 17.631577932  | 0 | 0 | 0 | # | ob  |
| 1272 | 8 | 3 | -1.050000 | 7.611867264  | 19.668746126  | 15.433153738  | 0 | 0 | 0 | # | ob  |
| 1273 | 8 | 7 | 2.100000  | 9.399697014  | 19.345319204  | -16.002222830 | 0 | 0 | 1 | # | st  |
| 1274 | 8 | 7 | 2.100000  | 8.718727774  | 23.791570782  | 16.003201903  | 0 | 0 | 0 | # | st  |
| 1275 | 8 | 7 | 2.100000  | 6.130402986  | 25.200180796  | 16.002222830  | 0 | 0 | 0 | # | st  |
| 1276 | 8 | 7 | 2.100000  | 8.718752986  | 20.745630796  | 16.002222830  | 0 | 0 | 0 | # | st  |
| 1277 | 8 | 7 | 2.100000  | 9.399722226  | 25.208479218  | -16.003201903 | 0 | 0 | 1 | # | st  |
| 1278 | 8 | 7 | 2.100000  | 6.811372226  | 20.753929218  | -16.003201903 | 0 | 0 | 1 | # | st  |
| 1279 | 8 | 7 | 2.100000  | 6.811347014  | 23.799869204  | -16.002222830 | 0 | 0 | 1 | # | st  |
| 1280 | 8 | 7 | 2.100000  | 6.130377774  | 19.337020782  | 16.003201903  | 0 | 0 | 0 | # | st  |
| 1281 | 8 | 1 | 1.575000  | 7.765255029  | -27.434438432 | -18.664729368 | 0 | 1 | 1 | # | ao  |
| 1282 | 8 | 1 | 1.575000  | 5.176905029  | -22.979888432 | -18.664729368 | 0 | 1 | 1 | # | ao  |
| 1283 | 8 | 1 | 1.575000  | 7.764844971  | -21.474661568 | 18.664729368  | 0 | 1 | 0 | # | ao  |
| 1284 | 8 | 1 | 1.575000  | 10.353194971 | -25.929211568 | 18.664729368  | 0 | 1 | 0 | # | ao  |
| 1285 | 8 | 2 | 0.425000  | 8.911350872  | -24.451832678 | -17.178884937 | 0 | 1 | 1 | # | ho  |
| 1286 | 8 | 2 | 0.425000  | 6.323000872  | 26.730017322  | -17.178884937 | 0 | 0 | 1 | # | ho  |
| 1287 | 8 | 2 | 0.425000  | 6.618749128  | -24.457267322 | 17.178884937  | 0 | 1 | 0 | # | ho  |
| 1288 | 8 | 2 | 0.425000  | 9.207099128  | -20.002717322 | 17.178884937  | 0 | 1 | 0 | # | ho  |
| 1289 | 8 | 3 | -1.050000 | 6.158014655  | -27.231598519 | 17.631577932  | 0 | 1 | 0 | # | ob  |
| 1290 | 8 | 3 | -1.050000 | 10.200217264 | -22.604003874 | 15.433153738  | 0 | 1 | 0 | # | ob  |
| 1291 | 8 | 3 | -1.050000 | 8.746944487  | -26.135450680 | 17.631368622  | 0 | 1 | 0 | # | ob  |
| 1292 | 8 | 3 | -1.050000 | 7.611539092  | -21.860389700 | 15.431920289  | 0 | 1 | 0 | # | ob  |
| 1293 | 8 | 3 | -1.050000 | 6.158594487  | -21.680900680 | 17.631368622  | 0 | 1 | 0 | # | ob  |
| 1294 | 8 | 3 | -1.050000 | 6.783155513  | -22.773649320 | -17.631368622 | 0 | 1 | 1 | # | ob  |
| 1295 | 8 | 3 | -1.050000 | 10.199889092 | -26.314939700 | 15.431920289  | 0 | 1 | 0 | # | ob  |
| 1296 | 8 | 3 | -1.050000 | 6.783735345  | -26.132051481 | -17.631577932 | 0 | 1 | 1 | # | ob  |
| 1297 | 8 | 3 | -1.050000 | 7.918232736  | -21.850546126 | -15.433153738 | 0 | 1 | 1 | # | ob  |
| 1298 | 8 | 3 | -1.050000 | 9.372085345  | -21.677501481 | -17.631577932 | 0 | 1 | 1 | # | ob  |
| 1299 | 8 | 3 | -1.050000 | 5.329882736  | -26.305096126 | -15.433153738 | 0 | 1 | 1 | # | ob  |
| 1300 | 8 | 3 | -1.050000 | 7.918560908  | -27.048710300 | -15.431920289 | 0 | 1 | 1 | # | ob  |
| 1301 | 8 | 6 | -0.950000 | 7.175957657  | 26.728240996  | -17.652417115 | 0 | 0 | 1 | # | oh  |
| 1302 | 8 | 3 | -1.050000 | 9.843781651  | 26.731276970  | -15.603517583 | 0 | 0 | 1 | # | ob  |
| 1303 | 8 | 6 | -0.950000 | 9.764307657  | -24.453609004 | -17.652417115 | 0 | 1 | 1 | # | oh  |
| 1304 | 8 | 3 | -1.050000 | 7.255431651  | -24.450573030 | -15.603517583 | 0 | 1 | 1 | # | ob  |
| 1305 | 8 | 4 | -0.950000 | 8.354142343  | -20.000940996 | 17.652417115  | 0 | 1 | 0 | # | oh  |
| 1306 | 8 | 5 | -0.950000 | 5.686318349  | -20.003976970 | 15.603517583  | 0 | 1 | 0 | # | oh  |
| 1307 | 8 | 6 | -0.950000 | 5.765792343  | -24.455490996 | 17.652417115  | 0 | 1 | 0 | # | oh  |
| 1308 | 8 | 3 | -1.050000 | 8.274668349  | -24.458526970 | 15.603517583  | 0 | 1 | 0 | # | ob  |
| 1309 | 8 | 3 | -1.050000 | 9.371505513  | -27.228199320 | -17.631368622 | 0 | 1 | 1 | # | ob  |
| 1310 | 8 | 3 | -1.050000 | 5.330210908  | -22.594160300 | -15.431920289 | 0 | 1 | 1 | # | ob  |
| 1311 | 8 | 3 | -1.050000 | 8.746364655  | -22.777048519 | 17.631577932  | 0 | 1 | 0 | # | ob  |
| 1312 | 8 | 3 | -1.050000 | 7.611867264  | -27.058553874 | 15.433153738  | 0 | 1 | 0 | # | ob  |
| 1313 | 8 | 7 | 2.100000  | 9.399697014  | -27.381980796 | -16.002222830 | 0 | 1 | 1 | # | st  |
| 1314 | 8 | 7 | 2.100000  | 8.718727774  | -22.935729218 | 16.003201903  | 0 | 1 | 0 | # | st  |
| 1315 | 8 | 7 | 2.100000  | 6.130402986  | -21.527119204 | 16.002222830  | 0 | 1 | 0 | # | st  |
| 1316 | 8 | 7 | 2.100000  | 8.718752986  | -25.981669204 | 16.002222830  | 0 | 1 | 0 | # | st  |
| 1317 | 8 | 7 | 2.100000  | 9.399722226  | -21.518820782 | -16.003201903 | 0 | 1 | 1 | # | st  |
| 1318 | 8 | 7 | 2.100000  | 6.811372226  | -25.973370782 | -16.003201903 | 0 | 1 | 1 | # | st  |
| 1319 | 8 | 7 | 2.100000  | 6.811347014  | -22.927430796 | -16.002222830 | 0 | 1 | 1 | # | st  |
| 1320 | 8 | 7 | 2.100000  | 6.130377774  | -27.390279218 | 16.003201903  | 0 | 1 | 0 | # | st  |
| 1321 | 8 | 5 | -0.950000 | 9.914166427  | -19.680858114 | -6.743779050  | 0 | 1 | 1 | # | oht |
| 1322 | 8 | 5 | -0.950000 | 5.481638203  | -0.272172439  | -12.134227113 | 0 | 0 | 1 | # | oht |
| 1323 | 8 | 2 | 0.425000  | 5.133272253  | -1.308055357  | -12.328360493 | 0 | 0 | 1 | # | ho  |
| 1324 | 8 | 2 | 0.425000  | 10.176688619 | -1.054326608  | -6.235429463  | 0 | 0 | 1 | # | ho  |
| 1325 | 8 | 2 | 0.425000  | 10.040548964 | -18.596754758 | -6.945886456  | 0 | 1 | 1 | # | ho  |
| 1326 | 8 | 2 | 0.425000  | 5.289748915  | -19.012312375 | -12.696363051 | 0 | 1 | 1 | # | ho  |
| 1327 | 9 | 1 | 1.575000  | 12.941955029 | 1.474661568   | -18.664729368 | 0 | 0 | 1 | # | ao  |
| 1328 | 9 | 1 | 1.575000  | 10.353605029 | 5.929211568   | -18.664729368 | 0 | 0 | 1 | # | ao  |
| 1329 | 9 | 1 | 1.575000  | 12.941544971 | 7.434438432   | 18.664729368  | 0 | 0 | 0 | # | ao  |
| 1330 | 9 | 1 | 1.575000  | 15.529894971 | 2.979888432   | 18.664729368  | 0 | 0 | 0 | # | ao  |
| 1331 | 9 | 2 | 0.425000  | 14.088050872 | 4.457267322   | -17.178884937 | 0 | 0 | 1 | # | ho  |

|      |   |   |           |              |              |               |   |   |   |   |     |
|------|---|---|-----------|--------------|--------------|---------------|---|---|---|---|-----|
| 1332 | 9 | 2 | 0.425000  | 11.499700872 | 0.002717322  | -17.178884937 | 0 | 0 | 1 | # | ho  |
| 1333 | 9 | 2 | 0.425000  | 11.795449128 | 4.451832678  | 17.178884937  | 0 | 0 | 0 | # | ho  |
| 1334 | 9 | 2 | 0.425000  | 14.383799128 | 8.906382678  | 17.178884937  | 0 | 0 | 0 | # | ho  |
| 1335 | 9 | 3 | -1.050000 | 11.334714655 | 1.677501481  | 17.631577932  | 0 | 0 | 0 | # | ob  |
| 1336 | 9 | 3 | -1.050000 | 15.376917264 | 6.305096126  | 15.433153738  | 0 | 0 | 0 | # | ob  |
| 1337 | 9 | 3 | -1.050000 | 13.923644487 | 2.773649320  | 17.631368622  | 0 | 0 | 0 | # | ob  |
| 1338 | 9 | 3 | -1.050000 | 12.788239092 | 7.048710300  | 15.431920289  | 0 | 0 | 0 | # | ob  |
| 1339 | 9 | 3 | -1.050000 | 11.335294487 | 7.228199320  | 17.631368622  | 0 | 0 | 0 | # | ob  |
| 1340 | 9 | 3 | -1.050000 | 11.959855513 | 6.135450680  | -17.631368622 | 0 | 0 | 1 | # | ob  |
| 1341 | 9 | 3 | -1.050000 | 15.376589092 | 2.594160300  | 15.431920289  | 0 | 0 | 0 | # | ob  |
| 1342 | 9 | 3 | -1.050000 | 11.960435345 | 2.777048519  | -17.631577932 | 0 | 0 | 1 | # | ob  |
| 1343 | 9 | 3 | -1.050000 | 13.094932736 | 7.058553874  | -15.433153738 | 0 | 0 | 1 | # | ob  |
| 1344 | 9 | 3 | -1.050000 | 14.548785345 | 7.231598519  | -17.631577932 | 0 | 0 | 1 | # | ob  |
| 1345 | 9 | 3 | -1.050000 | 10.506582736 | 2.604003874  | -15.433153738 | 0 | 0 | 1 | # | ob  |
| 1346 | 9 | 3 | -1.050000 | 13.095260908 | 1.860389700  | -15.431920289 | 0 | 0 | 1 | # | ob  |
| 1347 | 9 | 4 | -0.950000 | 12.352657657 | 0.000940996  | -17.652417115 | 0 | 0 | 1 | # | oho |
| 1348 | 9 | 5 | -0.950000 | 15.020481651 | 0.003976970  | -15.603517583 | 0 | 0 | 1 | # | oht |
| 1349 | 9 | 6 | -0.950000 | 14.941007657 | 4.455490996  | -17.652417115 | 0 | 0 | 1 | # | oh  |
| 1350 | 9 | 3 | -1.050000 | 12.432131651 | 4.458526970  | -15.603517583 | 0 | 0 | 1 | # | ob  |
| 1351 | 9 | 6 | -0.950000 | 13.530842343 | 8.908159004  | 17.652417115  | 0 | 0 | 0 | # | oh  |
| 1352 | 9 | 3 | -1.050000 | 10.863018349 | 8.905123030  | 15.603517583  | 0 | 0 | 0 | # | ob  |
| 1353 | 9 | 6 | -0.950000 | 10.942492343 | 4.453609004  | 17.652417115  | 0 | 0 | 0 | # | oh  |
| 1354 | 9 | 3 | -1.050000 | 13.451368349 | 4.450573030  | 15.603517583  | 0 | 0 | 0 | # | ob  |
| 1355 | 9 | 3 | -1.050000 | 14.548205513 | 1.680900680  | -17.631368622 | 0 | 0 | 1 | # | ob  |
| 1356 | 9 | 3 | -1.050000 | 10.506910908 | 6.314939700  | -15.431920289 | 0 | 0 | 1 | # | ob  |
| 1357 | 9 | 3 | -1.050000 | 13.923064655 | 6.132051481  | 17.631577932  | 0 | 0 | 0 | # | ob  |
| 1358 | 9 | 3 | -1.050000 | 12.788567264 | 1.850546126  | 15.433153738  | 0 | 0 | 0 | # | ob  |
| 1359 | 9 | 7 | 2.100000  | 14.576397014 | 1.527119204  | -16.002222830 | 0 | 0 | 1 | # | st  |
| 1360 | 9 | 7 | 2.100000  | 13.895427774 | 5.973370782  | 16.003201903  | 0 | 0 | 0 | # | st  |
| 1361 | 9 | 7 | 2.100000  | 11.307102986 | 7.381980796  | 16.002222830  | 0 | 0 | 0 | # | st  |
| 1362 | 9 | 7 | 2.100000  | 13.895452986 | 2.927430796  | 16.002222830  | 0 | 0 | 0 | # | st  |
| 1363 | 9 | 7 | 2.100000  | 14.576422226 | 7.390279218  | -16.003201903 | 0 | 0 | 1 | # | st  |
| 1364 | 9 | 7 | 2.100000  | 11.988072226 | 2.935729218  | -16.003201903 | 0 | 0 | 1 | # | st  |
| 1365 | 9 | 7 | 2.100000  | 11.988047014 | 5.981669204  | -16.002222830 | 0 | 0 | 1 | # | st  |
| 1366 | 9 | 7 | 2.100000  | 11.307077774 | 1.518820782  | 16.003201903  | 0 | 0 | 0 | # | st  |
| 1367 | 9 | 1 | 1.575000  | 12.941955029 | 10.383761568 | -18.664729368 | 0 | 0 | 1 | # | ao  |
| 1368 | 9 | 1 | 1.575000  | 10.353605029 | 14.838311568 | -18.664729368 | 0 | 0 | 1 | # | ao  |
| 1369 | 9 | 1 | 1.575000  | 12.941544971 | 16.343538432 | 18.664729368  | 0 | 0 | 0 | # | ao  |
| 1370 | 9 | 1 | 1.575000  | 15.529894971 | 11.888988432 | 18.664729368  | 0 | 0 | 0 | # | ao  |
| 1371 | 9 | 2 | 0.425000  | 14.088050872 | 13.366367322 | -17.178884937 | 0 | 0 | 1 | # | ho  |
| 1372 | 9 | 2 | 0.425000  | 11.499700872 | 8.911817322  | -17.178884937 | 0 | 0 | 1 | # | ho  |
| 1373 | 9 | 2 | 0.425000  | 11.795449128 | 13.360932678 | 17.178884937  | 0 | 0 | 0 | # | ho  |
| 1374 | 9 | 2 | 0.425000  | 14.383799128 | 17.815482678 | 17.178884937  | 0 | 0 | 0 | # | ho  |
| 1375 | 9 | 3 | -1.050000 | 11.334714655 | 10.586601481 | 17.631577932  | 0 | 0 | 0 | # | ob  |
| 1376 | 9 | 3 | -1.050000 | 15.376917264 | 15.214196126 | 15.433153738  | 0 | 0 | 0 | # | ob  |
| 1377 | 9 | 3 | -1.050000 | 13.923644487 | 11.682749320 | 17.631368622  | 0 | 0 | 0 | # | ob  |
| 1378 | 9 | 3 | -1.050000 | 12.788239092 | 15.957810300 | 15.431920289  | 0 | 0 | 0 | # | ob  |
| 1379 | 9 | 3 | -1.050000 | 11.335294487 | 16.137299320 | 17.631368622  | 0 | 0 | 0 | # | ob  |
| 1380 | 9 | 3 | -1.050000 | 11.959855513 | 15.044550680 | -17.631368622 | 0 | 0 | 1 | # | ob  |
| 1381 | 9 | 3 | -1.050000 | 15.376589092 | 11.503260300 | 15.431920289  | 0 | 0 | 0 | # | ob  |
| 1382 | 9 | 3 | -1.050000 | 11.960435345 | 11.686148519 | -17.631577932 | 0 | 0 | 1 | # | ob  |
| 1383 | 9 | 3 | -1.050000 | 13.094932736 | 15.967653874 | -15.433153738 | 0 | 0 | 1 | # | ob  |
| 1384 | 9 | 3 | -1.050000 | 14.548785345 | 16.140698519 | -17.631577932 | 0 | 0 | 1 | # | ob  |
| 1385 | 9 | 3 | -1.050000 | 10.506582736 | 11.513103874 | -15.433153738 | 0 | 0 | 1 | # | ob  |
| 1386 | 9 | 3 | -1.050000 | 13.095260908 | 10.769489700 | -15.431920289 | 0 | 0 | 1 | # | ob  |
| 1387 | 9 | 6 | -0.950000 | 12.352657657 | 8.910040996  | -17.652417115 | 0 | 0 | 1 | # | oh  |
| 1388 | 9 | 3 | -1.050000 | 15.020481651 | 8.913076970  | -15.603517583 | 0 | 0 | 1 | # | ob  |
| 1389 | 9 | 6 | -0.950000 | 14.941007657 | 13.364590996 | -17.652417115 | 0 | 0 | 1 | # | oh  |
| 1390 | 9 | 3 | -1.050000 | 12.432131651 | 13.367626970 | -15.603517583 | 0 | 0 | 1 | # | ob  |
| 1391 | 9 | 6 | -0.950000 | 13.530842343 | 17.817259004 | 17.652417115  | 0 | 0 | 0 | # | oh  |
| 1392 | 9 | 3 | -1.050000 | 10.863018349 | 17.814223030 | 15.603517583  | 0 | 0 | 0 | # | ob  |
| 1393 | 9 | 6 | -0.950000 | 10.942492343 | 13.362709004 | 17.652417115  | 0 | 0 | 0 | # | oh  |
| 1394 | 9 | 3 | -1.050000 | 13.451368349 | 13.359673030 | 15.603517583  | 0 | 0 | 0 | # | ob  |
| 1395 | 9 | 3 | -1.050000 | 14.548205513 | 10.590000680 | -17.631368622 | 0 | 0 | 1 | # | ob  |
| 1396 | 9 | 3 | -1.050000 | 10.506910908 | 15.224039700 | -15.431920289 | 0 | 0 | 1 | # | ob  |
| 1397 | 9 | 3 | -1.050000 | 13.923064655 | 15.041151481 | 17.631577932  | 0 | 0 | 0 | # | ob  |
| 1398 | 9 | 3 | -1.050000 | 12.788567264 | 10.759646126 | 15.433153738  | 0 | 0 | 0 | # | ob  |
| 1399 | 9 | 7 | 2.100000  | 14.576397014 | 10.436219204 | -16.002222830 | 0 | 0 | 1 | # | st  |
| 1400 | 9 | 7 | 2.100000  | 13.895427774 | 14.882470782 | 16.003201903  | 0 | 0 | 0 | # | st  |
| 1401 | 9 | 7 | 2.100000  | 11.307102986 | 16.291080796 | 16.002222830  | 0 | 0 | 0 | # | st  |
| 1402 | 9 | 7 | 2.100000  | 13.895452986 | 11.836530796 | 16.002222830  | 0 | 0 | 0 | # | st  |
| 1403 | 9 | 7 | 2.100000  | 14.576422226 | 16.299379218 | -16.003201903 | 0 | 0 | 1 | # | st  |
| 1404 | 9 | 7 | 2.100000  | 11.988072226 | 11.844829218 | -16.003201903 | 0 | 0 | 1 | # | st  |
| 1405 | 9 | 7 | 2.100000  | 11.988047014 | 14.890769204 | -16.002222830 | 0 | 0 | 1 | # | st  |
| 1406 | 9 | 7 | 2.100000  | 11.307077774 | 10.427920782 | 16.003201903  | 0 | 0 | 0 | # | st  |
| 1407 | 9 | 1 | 1.575000  | 12.941955029 | 19.292861568 | -18.664729368 | 0 | 0 | 1 | # | ao  |
| 1408 | 9 | 1 | 1.575000  | 10.353605029 | 23.747411568 | -18.664729368 | 0 | 0 | 1 | # | ao  |
| 1409 | 9 | 1 | 1.575000  | 12.941544971 | 25.252638432 | 18.664729368  | 0 | 0 | 0 | # | ao  |
| 1410 | 9 | 1 | 1.575000  | 15.529894971 | 20.798088432 | 18.664729368  | 0 | 0 | 0 | # | ao  |
| 1411 | 9 | 2 | 0.425000  | 14.088050872 | 22.275467322 | -17.178884937 | 0 | 0 | 1 | # | ho  |
| 1412 | 9 | 2 | 0.425000  | 11.499700872 | 17.820917322 | -17.178884937 | 0 | 0 | 1 | # | ho  |
| 1413 | 9 | 2 | 0.425000  | 11.795449128 | 22.270032678 | 17.178884937  | 0 | 0 | 0 | # | ho  |
| 1414 | 9 | 2 | 0.425000  | 14.383799128 | 26.724582678 | 17.178884937  | 0 | 0 | 0 | # | ho  |
| 1415 | 9 | 3 | -1.050000 | 11.334714655 | 19.495701481 | 17.631577932  | 0 | 0 | 0 | # | ob  |
| 1416 | 9 | 3 | -1.050000 | 15.376917264 | 24.123296126 | 15.433153738  | 0 | 0 | 0 | # | ob  |
| 1417 | 9 | 3 | -1.050000 | 13.923644487 | 20.591849320 | 17.631368622  | 0 | 0 | 0 | # | ob  |
| 1418 | 9 | 3 | -1.050000 | 12.788239092 | 24.866910300 | 15.431920289  | 0 | 0 | 0 | # | ob  |
| 1419 | 9 | 3 | -1.050000 | 11.335294487 | 25.046399320 | 17.631368622  | 0 | 0 | 0 | # | ob  |
| 1420 | 9 | 3 | -1.050000 | 11.959855513 | 23.953650680 | -17.631368622 | 0 | 0 | 1 | # | ob  |
| 1421 | 9 | 3 | -1.050000 | 15.376589092 | 20.412360300 | 15.431920289  | 0 | 0 | 0 | # | ob  |
| 1422 | 9 | 3 | -1.050000 | 11.960435345 | 20.595248519 | -17.631577932 | 0 | 0 | 1 | # | ob  |
| 1423 | 9 | 3 | -1.050000 | 13.094932736 | 24.876753874 | -15.433153738 | 0 | 0 | 1 | # | ob  |
| 1424 | 9 | 3 | -1.050000 | 14.548785345 | 25.049798519 | -17.631577932 | 0 | 0 | 1 | # | ob  |

|      |    |   |           |               |               |               |   |   |   |   |     |
|------|----|---|-----------|---------------|---------------|---------------|---|---|---|---|-----|
| 1425 | 9  | 3 | -1.050000 | 10.506582736  | 20.422203874  | -15.433153738 | 0 | 0 | 1 | # | ob  |
| 1426 | 9  | 3 | -1.050000 | 13.095260908  | 19.678589700  | -15.431920289 | 0 | 0 | 1 | # | ob  |
| 1427 | 9  | 6 | -0.950000 | 12.352657657  | 17.819140996  | -17.652417115 | 0 | 0 | 1 | # | oh  |
| 1428 | 9  | 3 | -1.050000 | 15.020481651  | 17.822176970  | -15.603517583 | 0 | 0 | 1 | # | ob  |
| 1429 | 9  | 6 | -0.950000 | 14.941007657  | 22.273690996  | -17.652417115 | 0 | 0 | 1 | # | oh  |
| 1430 | 9  | 3 | -1.050000 | 12.432131651  | 22.276726970  | -15.603517583 | 0 | 0 | 1 | # | ob  |
| 1431 | 9  | 6 | -0.950000 | 13.530842343  | 26.726359004  | 17.652417115  | 0 | 0 | 0 | # | oh  |
| 1432 | 9  | 3 | -1.050000 | 10.863018349  | 26.723323030  | 15.603517583  | 0 | 0 | 0 | # | ob  |
| 1433 | 9  | 6 | -0.950000 | 10.942492343  | 22.271809004  | 17.652417115  | 0 | 0 | 0 | # | oh  |
| 1434 | 9  | 3 | -1.050000 | 13.451368349  | 22.268773030  | 15.603517583  | 0 | 0 | 0 | # | ob  |
| 1435 | 9  | 3 | -1.050000 | 14.548205513  | 19.499100680  | -17.631368622 | 0 | 0 | 1 | # | ob  |
| 1436 | 9  | 3 | -1.050000 | 10.506910908  | 24.133139700  | -15.431920289 | 0 | 0 | 1 | # | ob  |
| 1437 | 9  | 3 | -1.050000 | 13.923064655  | 23.950251481  | 17.631577932  | 0 | 0 | 0 | # | ob  |
| 1438 | 9  | 3 | -1.050000 | 12.788567264  | 19.668746126  | 15.433153738  | 0 | 0 | 0 | # | ob  |
| 1439 | 9  | 7 | 2.100000  | 14.576397014  | 19.345319204  | -16.002222830 | 0 | 0 | 1 | # | st  |
| 1440 | 9  | 7 | 2.100000  | 13.895427774  | 23.791570782  | 16.003201903  | 0 | 0 | 0 | # | st  |
| 1441 | 9  | 7 | 2.100000  | 11.307102986  | 25.200180796  | 16.002222830  | 0 | 0 | 0 | # | st  |
| 1442 | 9  | 7 | 2.100000  | 13.895452986  | 20.745630796  | 16.002222830  | 0 | 0 | 0 | # | st  |
| 1443 | 9  | 7 | 2.100000  | 14.576422226  | 25.208479218  | -16.003201903 | 0 | 0 | 1 | # | st  |
| 1444 | 9  | 7 | 2.100000  | 11.988072226  | 20.753929218  | -16.003201903 | 0 | 0 | 1 | # | st  |
| 1445 | 9  | 7 | 2.100000  | 11.988047014  | 23.799869204  | -16.002222830 | 0 | 0 | 1 | # | st  |
| 1446 | 9  | 7 | 2.100000  | 11.307077774  | 19.337020782  | 16.003201903  | 0 | 0 | 0 | # | st  |
| 1447 | 9  | 1 | 1.575000  | 12.941955029  | -27.434438432 | -18.664729368 | 0 | 1 | 1 | # | ao  |
| 1448 | 9  | 1 | 1.575000  | 10.353605029  | -22.979888432 | -18.664729368 | 0 | 1 | 1 | # | ao  |
| 1449 | 9  | 1 | 1.575000  | 12.941544971  | -21.474661568 | 18.664729368  | 0 | 1 | 0 | # | ao  |
| 1450 | 9  | 1 | 1.575000  | 15.529894971  | -25.929211568 | 18.664729368  | 0 | 1 | 0 | # | ao  |
| 1451 | 9  | 2 | 0.425000  | 14.088050872  | -24.451832678 | -17.178884937 | 0 | 1 | 1 | # | ho  |
| 1452 | 9  | 2 | 0.425000  | 11.499700872  | 26.730017322  | -17.178884937 | 0 | 1 | 1 | # | ho  |
| 1453 | 9  | 2 | 0.425000  | 11.795449128  | -24.457267322 | 17.178884937  | 0 | 1 | 0 | # | ho  |
| 1454 | 9  | 2 | 0.425000  | 14.383799128  | -20.002717322 | 17.178884937  | 0 | 1 | 0 | # | ho  |
| 1455 | 9  | 3 | -1.050000 | 11.334714655  | -27.231598519 | 17.631577932  | 0 | 1 | 0 | # | ob  |
| 1456 | 9  | 3 | -1.050000 | 15.376917264  | -22.604003874 | 15.433153738  | 0 | 1 | 0 | # | ob  |
| 1457 | 9  | 3 | -1.050000 | 13.923644487  | -26.135450680 | 17.631368622  | 0 | 1 | 0 | # | ob  |
| 1458 | 9  | 3 | -1.050000 | 12.788239092  | -21.860389700 | 15.431920289  | 0 | 1 | 0 | # | ob  |
| 1459 | 9  | 3 | -1.050000 | 11.335294487  | -21.680900680 | 17.631368622  | 0 | 1 | 0 | # | ob  |
| 1460 | 9  | 3 | -1.050000 | 11.959855513  | -22.773649320 | -17.631368622 | 0 | 1 | 1 | # | ob  |
| 1461 | 9  | 3 | -1.050000 | 15.376589092  | -26.314939700 | 15.431920289  | 0 | 1 | 0 | # | ob  |
| 1462 | 9  | 3 | -1.050000 | 11.960435345  | -26.132051481 | -17.631577932 | 0 | 1 | 1 | # | ob  |
| 1463 | 9  | 3 | -1.050000 | 13.094932736  | -21.850546126 | -15.433153738 | 0 | 1 | 1 | # | ob  |
| 1464 | 9  | 3 | -1.050000 | 14.548785345  | -21.677501481 | -17.631577932 | 0 | 1 | 1 | # | ob  |
| 1465 | 9  | 3 | -1.050000 | 10.506582736  | -26.305096126 | -15.433153738 | 0 | 1 | 1 | # | ob  |
| 1466 | 9  | 3 | -1.050000 | 13.095260908  | -27.048710300 | -15.431920289 | 0 | 1 | 1 | # | ob  |
| 1467 | 9  | 6 | -0.950000 | 12.352657657  | 26.728240996  | -17.652417115 | 0 | 0 | 1 | # | oh  |
| 1468 | 9  | 3 | -1.050000 | 15.020481651  | 26.731276970  | -15.603517583 | 0 | 0 | 1 | # | ob  |
| 1469 | 9  | 6 | -0.950000 | 14.941007657  | -24.453609004 | -17.652417115 | 0 | 1 | 1 | # | oh  |
| 1470 | 9  | 3 | -1.050000 | 12.432131651  | -24.450573030 | -15.603517583 | 0 | 1 | 1 | # | ob  |
| 1471 | 9  | 4 | -0.950000 | 13.530842343  | -20.000940996 | 17.652417115  | 0 | 1 | 0 | # | oho |
| 1472 | 9  | 5 | -0.950000 | 10.863018349  | -20.003976970 | 15.603517583  | 0 | 1 | 0 | # | oht |
| 1473 | 9  | 6 | -0.950000 | 10.942492343  | -24.455490996 | 17.652417115  | 0 | 1 | 0 | # | oh  |
| 1474 | 9  | 3 | -1.050000 | 13.451368349  | -24.458526970 | 15.603517583  | 0 | 1 | 0 | # | ob  |
| 1475 | 9  | 3 | -1.050000 | 14.548205513  | -27.228199320 | -17.631368622 | 0 | 1 | 1 | # | ob  |
| 1476 | 9  | 3 | -1.050000 | 10.506910908  | -22.594160300 | -15.431920289 | 0 | 1 | 1 | # | ob  |
| 1477 | 9  | 3 | -1.050000 | 13.923064655  | -22.777048519 | 17.631577932  | 0 | 1 | 0 | # | ob  |
| 1478 | 9  | 3 | -1.050000 | 12.788567264  | -27.058553874 | 15.433153738  | 0 | 1 | 0 | # | ob  |
| 1479 | 9  | 7 | 2.100000  | 14.576397014  | -27.381980796 | -16.002222830 | 0 | 1 | 1 | # | st  |
| 1480 | 9  | 7 | 2.100000  | 13.895427774  | -22.935729218 | 16.003201903  | 0 | 1 | 0 | # | st  |
| 1481 | 9  | 7 | 2.100000  | 11.307102986  | -21.527119204 | 16.002222830  | 0 | 1 | 0 | # | st  |
| 1482 | 9  | 7 | 2.100000  | 13.895452986  | -25.981669204 | 16.002222830  | 0 | 1 | 0 | # | st  |
| 1483 | 9  | 7 | 2.100000  | 14.576422226  | -21.518820782 | -16.003201903 | 0 | 1 | 1 | # | st  |
| 1484 | 9  | 7 | 2.100000  | 11.988072226  | -25.973370782 | -16.003201903 | 0 | 1 | 1 | # | st  |
| 1485 | 9  | 7 | 2.100000  | 11.988047014  | -22.927430796 | -16.002222830 | 0 | 1 | 1 | # | st  |
| 1486 | 9  | 7 | 2.100000  | 11.307077774  | -27.390279218 | 16.003201903  | 0 | 1 | 0 | # | st  |
| 1487 | 9  | 5 | -0.950000 | 15.090866427  | -19.680858114 | -6.743779050  | 0 | 1 | 1 | # | oht |
| 1488 | 9  | 5 | -0.950000 | 10.658338203  | -0.272172439  | -12.134227113 | 0 | 0 | 1 | # | oht |
| 1489 | 9  | 2 | 0.425000  | 10.309972253  | -1.308055357  | -12.328360493 | 0 | 0 | 1 | # | ho  |
| 1490 | 9  | 2 | 0.425000  | 15.353388619  | -1.054326608  | -6.235429463  | 0 | 0 | 1 | # | ho  |
| 1491 | 9  | 2 | 0.425000  | 15.217248964  | -18.596754758 | -6.945886456  | 0 | 1 | 1 | # | ho  |
| 1492 | 9  | 2 | 0.425000  | 10.466448915  | -19.012312375 | -12.696363051 | 0 | 1 | 1 | # | ho  |
| 1493 | 10 | 1 | 1.575000  | -12.941544971 | 1.474661568   | -18.664729368 | 1 | 0 | 1 | # | ao  |
| 1494 | 10 | 1 | 1.575000  | -15.529894971 | 5.929211568   | -18.664729368 | 1 | 0 | 1 | # | ao  |
| 1495 | 10 | 1 | 1.575000  | -12.941955029 | 7.434438432   | 18.664729368  | 1 | 0 | 0 | # | ao  |
| 1496 | 10 | 1 | 1.575000  | -10.353605029 | 2.979888432   | 18.664729368  | 1 | 0 | 0 | # | ao  |
| 1497 | 10 | 2 | 0.425000  | -11.795449128 | 4.457267322   | -17.178884937 | 1 | 0 | 1 | # | ho  |
| 1498 | 10 | 2 | 0.425000  | -14.383799128 | 0.002717322   | -17.178884937 | 1 | 0 | 1 | # | ho  |
| 1499 | 10 | 2 | 0.425000  | -14.088050872 | 4.451832678   | 17.178884937  | 1 | 0 | 0 | # | ho  |
| 1500 | 10 | 2 | 0.425000  | -11.499700872 | 8.906382678   | 17.178884937  | 1 | 0 | 0 | # | ho  |
| 1501 | 10 | 3 | -1.050000 | -14.548785345 | 1.677501481   | 17.631577932  | 1 | 0 | 0 | # | ob  |
| 1502 | 10 | 3 | -1.050000 | -10.506582736 | 6.305096126   | 15.433153738  | 1 | 0 | 0 | # | ob  |
| 1503 | 10 | 3 | -1.050000 | -11.959855513 | 2.773649320   | 17.631368622  | 1 | 0 | 0 | # | ob  |
| 1504 | 10 | 3 | -1.050000 | -13.095260908 | 7.048710300   | 15.431920289  | 1 | 0 | 0 | # | ob  |
| 1505 | 10 | 3 | -1.050000 | -14.548205513 | 7.228199320   | 17.631368622  | 1 | 0 | 0 | # | ob  |
| 1506 | 10 | 3 | -1.050000 | -13.923644487 | 6.135450680   | -17.631368622 | 1 | 0 | 1 | # | ob  |
| 1507 | 10 | 3 | -1.050000 | -10.506910908 | 2.594160300   | 15.431920289  | 1 | 0 | 0 | # | ob  |
| 1508 | 10 | 3 | -1.050000 | -13.923064655 | 2.777048519   | -17.631577932 | 1 | 0 | 1 | # | ob  |
| 1509 | 10 | 3 | -1.050000 | -12.788567264 | 7.058553874   | -15.433153738 | 1 | 0 | 1 | # | ob  |
| 1510 | 10 | 3 | -1.050000 | -11.334714655 | 7.231598519   | -17.631577932 | 1 | 0 | 1 | # | ob  |
| 1511 | 10 | 3 | -1.050000 | -15.376917264 | 2.604003874   | -15.433153738 | 1 | 0 | 1 | # | ob  |
| 1512 | 10 | 3 | -1.050000 | -12.788239092 | 1.860389700   | -15.431920289 | 1 | 0 | 1 | # | ob  |
| 1513 | 10 | 4 | -0.950000 | -13.530842343 | 0.000940996   | -17.652417115 | 1 | 0 | 1 | # | oho |
| 1514 | 10 | 5 | -0.950000 | -10.863018349 | 0.003976970   | -15.603517583 | 1 | 0 | 1 | # | oht |
| 1515 | 10 | 6 | -0.950000 | -10.942492343 | 4.455490996   | -17.652417115 | 1 | 0 | 1 | # | oh  |
| 1516 | 10 | 3 | -1.050000 | -13.451368349 | 4.458526970   | -15.603517583 | 1 | 0 | 1 | # | ob  |
| 1517 | 10 | 6 | -0.950000 | -12.352657657 | 8.908159004   | 17.652417115  | 1 | 0 | 0 | # | oh  |

|      |    |   |           |               |              |               |   |   |   |   |    |
|------|----|---|-----------|---------------|--------------|---------------|---|---|---|---|----|
| 1518 | 10 | 3 | -1.050000 | -15.020481651 | 8.905123030  | 15.603517583  | 1 | 0 | 0 | # | ob |
| 1519 | 10 | 6 | -0.950000 | -14.941007657 | 4.453609004  | 17.652417115  | 1 | 0 | 0 | # | oh |
| 1520 | 10 | 3 | -1.050000 | -12.432131651 | 4.450573030  | 15.603517583  | 1 | 0 | 0 | # | ob |
| 1521 | 10 | 3 | -1.050000 | -11.335294487 | 1.680900680  | -17.631368622 | 1 | 0 | 1 | # | ob |
| 1522 | 10 | 3 | -1.050000 | -15.376589092 | 6.314939700  | -15.431920289 | 1 | 0 | 1 | # | ob |
| 1523 | 10 | 3 | -1.050000 | -11.960435345 | 6.132051481  | 17.631577932  | 1 | 0 | 0 | # | ob |
| 1524 | 10 | 3 | -1.050000 | -13.094932736 | 1.850546126  | 15.433153738  | 1 | 0 | 0 | # | ob |
| 1525 | 10 | 7 | 2.100000  | -11.307102986 | 1.527119204  | -16.002222830 | 1 | 0 | 1 | # | st |
| 1526 | 10 | 7 | 2.100000  | -11.988072226 | 5.973370782  | 16.003201903  | 1 | 0 | 0 | # | st |
| 1527 | 10 | 7 | 2.100000  | -14.576397014 | 7.381980796  | 16.002222830  | 1 | 0 | 0 | # | st |
| 1528 | 10 | 7 | 2.100000  | -11.988047014 | 2.927430796  | 16.002222830  | 1 | 0 | 0 | # | st |
| 1529 | 10 | 7 | 2.100000  | -11.307077774 | 7.390279218  | -16.003201903 | 1 | 0 | 1 | # | st |
| 1530 | 10 | 7 | 2.100000  | -13.895427774 | 2.935729218  | -16.003201903 | 1 | 0 | 1 | # | st |
| 1531 | 10 | 7 | 2.100000  | -13.895452986 | 5.981669204  | -16.002222830 | 1 | 0 | 1 | # | st |
| 1532 | 10 | 7 | 2.100000  | -14.576422226 | 1.518820782  | 16.003201903  | 1 | 0 | 0 | # | st |
| 1533 | 10 | 1 | 1.575000  | -12.941544971 | 10.383761568 | -18.664729368 | 1 | 0 | 1 | # | ao |
| 1534 | 10 | 1 | 1.575000  | -15.529894971 | 14.838311568 | -18.664729368 | 1 | 0 | 1 | # | ao |
| 1535 | 10 | 1 | 1.575000  | -12.941955029 | 16.343538432 | 18.664729368  | 1 | 0 | 0 | # | ao |
| 1536 | 10 | 1 | 1.575000  | -10.353605029 | 11.888988432 | 18.664729368  | 1 | 0 | 0 | # | ao |
| 1537 | 10 | 2 | 0.425000  | -11.795449128 | 13.366367322 | -17.178884937 | 1 | 0 | 1 | # | ho |
| 1538 | 10 | 2 | 0.425000  | -14.383799128 | 8.911817322  | -17.178884937 | 1 | 0 | 1 | # | ho |
| 1539 | 10 | 2 | 0.425000  | -14.088050872 | 13.360932678 | 17.178884937  | 1 | 0 | 0 | # | ho |
| 1540 | 10 | 2 | 0.425000  | -11.499700872 | 17.815482678 | 17.178884937  | 1 | 0 | 0 | # | ho |
| 1541 | 10 | 3 | -1.050000 | -14.548785345 | 10.586601481 | 17.631577932  | 1 | 0 | 0 | # | ob |
| 1542 | 10 | 3 | -1.050000 | -10.506582736 | 15.214196126 | 15.433153738  | 1 | 0 | 0 | # | ob |
| 1543 | 10 | 3 | -1.050000 | -11.959855513 | 11.682749320 | 17.631368622  | 1 | 0 | 0 | # | ob |
| 1544 | 10 | 3 | -1.050000 | -13.095260908 | 15.957810300 | 15.431920289  | 1 | 0 | 0 | # | ob |
| 1545 | 10 | 3 | -1.050000 | -14.548205513 | 16.137299320 | 17.631368622  | 1 | 0 | 0 | # | ob |
| 1546 | 10 | 3 | -1.050000 | -13.923644487 | 15.044550680 | -17.631368622 | 1 | 0 | 1 | # | ob |
| 1547 | 10 | 3 | -1.050000 | -10.506910908 | 11.503260300 | 15.431920289  | 1 | 0 | 0 | # | ob |
| 1548 | 10 | 3 | -1.050000 | -13.923064655 | 11.686148519 | -17.631577932 | 1 | 0 | 1 | # | ob |
| 1549 | 10 | 3 | -1.050000 | -12.788567264 | 15.967653874 | -15.433153738 | 1 | 0 | 1 | # | ob |
| 1550 | 10 | 3 | -1.050000 | -11.334714655 | 16.140698519 | -17.631577932 | 1 | 0 | 1 | # | ob |
| 1551 | 10 | 3 | -1.050000 | -15.376917264 | 11.513103874 | -15.433153738 | 1 | 0 | 1 | # | ob |
| 1552 | 10 | 3 | -1.050000 | -12.788239092 | 10.769489700 | -15.431920289 | 1 | 0 | 1 | # | ob |
| 1553 | 10 | 6 | -0.950000 | -13.530842343 | 8.910040996  | -17.652417115 | 1 | 0 | 1 | # | oh |
| 1554 | 10 | 3 | -1.050000 | -10.863018349 | 8.913076970  | -15.603517583 | 1 | 0 | 1 | # | ob |
| 1555 | 10 | 6 | -0.950000 | -10.942492343 | 13.364590996 | -17.652417115 | 1 | 0 | 1 | # | oh |
| 1556 | 10 | 3 | -1.050000 | -13.451368349 | 13.367626970 | -15.603517583 | 1 | 0 | 1 | # | ob |
| 1557 | 10 | 6 | -0.950000 | -12.352657657 | 17.817259004 | 17.652417115  | 1 | 0 | 0 | # | oh |
| 1558 | 10 | 3 | -1.050000 | -15.020481651 | 17.814223030 | 15.603517583  | 1 | 0 | 0 | # | ob |
| 1559 | 10 | 6 | -0.950000 | -14.941007657 | 13.362709004 | 17.652417115  | 1 | 0 | 0 | # | oh |
| 1560 | 10 | 3 | -1.050000 | -12.432131651 | 13.359673030 | 15.603517583  | 1 | 0 | 0 | # | ob |
| 1561 | 10 | 3 | -1.050000 | -11.335294487 | 10.590000680 | -17.631368622 | 1 | 0 | 1 | # | ob |
| 1562 | 10 | 3 | -1.050000 | -15.376589092 | 15.224039700 | -15.431920289 | 1 | 0 | 1 | # | ob |
| 1563 | 10 | 3 | -1.050000 | -11.960435345 | 15.041151481 | 17.631577932  | 1 | 0 | 0 | # | ob |
| 1564 | 10 | 3 | -1.050000 | -13.094932736 | 10.759646126 | 15.433153738  | 1 | 0 | 0 | # | ob |
| 1565 | 10 | 7 | 2.100000  | -11.307102986 | 10.436219204 | -16.002222830 | 1 | 0 | 1 | # | st |
| 1566 | 10 | 7 | 2.100000  | -11.988072226 | 14.882470782 | 16.003201903  | 1 | 0 | 0 | # | st |
| 1567 | 10 | 7 | 2.100000  | -14.576397014 | 16.291080796 | 16.002222830  | 1 | 0 | 0 | # | st |
| 1568 | 10 | 7 | 2.100000  | -11.988047014 | 11.836530796 | 16.002222830  | 1 | 0 | 0 | # | st |
| 1569 | 10 | 7 | 2.100000  | -11.307077774 | 16.299379218 | -16.003201903 | 1 | 0 | 1 | # | st |
| 1570 | 10 | 7 | 2.100000  | -13.895427774 | 11.844829218 | -16.003201903 | 1 | 0 | 1 | # | st |
| 1571 | 10 | 7 | 2.100000  | -13.895452986 | 14.890769204 | -16.002222830 | 1 | 0 | 1 | # | st |
| 1572 | 10 | 7 | 2.100000  | -14.576422226 | 10.427920782 | 16.003201903  | 1 | 0 | 0 | # | st |
| 1573 | 10 | 1 | 1.575000  | -12.941544971 | 19.292861568 | -18.664729368 | 1 | 0 | 1 | # | ao |
| 1574 | 10 | 1 | 1.575000  | -15.529894971 | 23.747411568 | -18.664729368 | 1 | 0 | 1 | # | ao |
| 1575 | 10 | 1 | 1.575000  | -12.941955029 | 25.252638432 | 18.664729368  | 1 | 0 | 0 | # | ao |
| 1576 | 10 | 1 | 1.575000  | -10.353605029 | 20.798088432 | 18.664729368  | 1 | 0 | 0 | # | ao |
| 1577 | 10 | 2 | 0.425000  | -11.795449128 | 22.275467322 | -17.178884937 | 1 | 0 | 1 | # | ho |
| 1578 | 10 | 2 | 0.425000  | -14.383799128 | 17.820917322 | -17.178884937 | 1 | 0 | 1 | # | ho |
| 1579 | 10 | 2 | 0.425000  | -14.088050872 | 22.270032678 | 17.178884937  | 1 | 0 | 0 | # | ho |
| 1580 | 10 | 2 | 0.425000  | -11.499700872 | 26.724582678 | 17.178884937  | 1 | 0 | 0 | # | ho |
| 1581 | 10 | 3 | -1.050000 | -14.548785345 | 19.495701481 | 17.631577932  | 1 | 0 | 0 | # | ob |
| 1582 | 10 | 3 | -1.050000 | -10.506582736 | 24.123296126 | 15.433153738  | 1 | 0 | 0 | # | ob |
| 1583 | 10 | 3 | -1.050000 | -11.959855513 | 20.591849320 | 17.631368622  | 1 | 0 | 0 | # | ob |
| 1584 | 10 | 3 | -1.050000 | -13.095260908 | 24.866910300 | 15.431920289  | 1 | 0 | 0 | # | ob |
| 1585 | 10 | 3 | -1.050000 | -14.548205513 | 25.046399320 | 17.631368622  | 1 | 0 | 0 | # | ob |
| 1586 | 10 | 3 | -1.050000 | -13.923644487 | 23.953650680 | -17.631368622 | 1 | 0 | 1 | # | ob |
| 1587 | 10 | 3 | -1.050000 | -10.506910908 | 20.412360300 | 15.431920289  | 1 | 0 | 0 | # | ob |
| 1588 | 10 | 3 | -1.050000 | -13.923064655 | 20.595248519 | -17.631577932 | 1 | 0 | 1 | # | ob |
| 1589 | 10 | 3 | -1.050000 | -12.788567264 | 24.876753874 | -15.433153738 | 1 | 0 | 1 | # | ob |
| 1590 | 10 | 3 | -1.050000 | -11.334714655 | 25.049798519 | -17.631577932 | 1 | 0 | 1 | # | ob |
| 1591 | 10 | 3 | -1.050000 | -15.376917264 | 20.422203874 | -15.433153738 | 1 | 0 | 1 | # | ob |
| 1592 | 10 | 3 | -1.050000 | -12.788239092 | 19.678589700 | -15.431920289 | 1 | 0 | 1 | # | ob |
| 1593 | 10 | 6 | -0.950000 | -13.530842343 | 17.819140996 | -17.652417115 | 1 | 0 | 1 | # | oh |
| 1594 | 10 | 3 | -1.050000 | -10.863018349 | 17.822176970 | -15.603517583 | 1 | 0 | 1 | # | ob |
| 1595 | 10 | 6 | -0.950000 | -10.942492343 | 22.273690996 | -17.652417115 | 1 | 0 | 1 | # | oh |
| 1596 | 10 | 3 | -1.050000 | -13.451368349 | 22.276726970 | -15.603517583 | 1 | 0 | 1 | # | ob |
| 1597 | 10 | 6 | -0.950000 | -12.352657657 | 26.726359004 | 17.652417115  | 1 | 0 | 0 | # | oh |
| 1598 | 10 | 3 | -1.050000 | -15.020481651 | 26.723323030 | 15.603517583  | 1 | 0 | 0 | # | ob |
| 1599 | 10 | 6 | -0.950000 | -14.941007657 | 22.271809004 | 17.652417115  | 1 | 0 | 0 | # | oh |
| 1600 | 10 | 3 | -1.050000 | -12.432131651 | 22.268773030 | 15.603517583  | 1 | 0 | 0 | # | ob |
| 1601 | 10 | 3 | -1.050000 | -11.335294487 | 19.499100680 | -17.631368622 | 1 | 0 | 1 | # | ob |
| 1602 | 10 | 3 | -1.050000 | -15.376589092 | 24.133139700 | -15.431920289 | 1 | 0 | 1 | # | ob |
| 1603 | 10 | 3 | -1.050000 | -11.960435345 | 23.950251481 | 17.631577932  | 1 | 0 | 0 | # | ob |
| 1604 | 10 | 3 | -1.050000 | -13.094932736 | 19.668746126 | 15.433153738  | 1 | 0 | 0 | # | ob |
| 1605 | 10 | 7 | 2.100000  | -11.307102986 | 19.345319204 | -16.002222830 | 1 | 0 | 1 | # | st |
| 1606 | 10 | 7 | 2.100000  | -11.988072226 | 23.791570782 | 16.003201903  | 1 | 0 | 0 | # | st |
| 1607 | 10 | 7 | 2.100000  | -14.576397014 | 25.200180796 | 16.002222830  | 1 | 0 | 0 | # | st |
| 1608 | 10 | 7 | 2.100000  | -11.988047014 | 20.745630796 | 16.002222830  | 1 | 0 | 0 | # | st |
| 1609 | 10 | 7 | 2.100000  | -11.307077774 | 25.208479218 | -16.003201903 | 1 | 0 | 1 | # | st |
| 1610 | 10 | 7 | 2.100000  | -13.895427774 | 20.753929218 | -16.003201903 | 1 | 0 | 1 | # | st |



|      |    |   |           |               |               |               |   |   |   |   |     |
|------|----|---|-----------|---------------|---------------|---------------|---|---|---|---|-----|
| 1611 | 10 | 7 | 2.100000  | -13.895452986 | 23.799869204  | -16.002222830 | 1 | 0 | 1 | # | st  |
| 1612 | 10 | 7 | 2.100000  | -14.576422226 | 19.337020782  | 16.003201903  | 1 | 0 | 0 | # | st  |
| 1613 | 10 | 1 | 1.575000  | -12.941544971 | -27.434438432 | -18.664729368 | 1 | 1 | 1 | # | ao  |
| 1614 | 10 | 1 | 1.575000  | -15.529894971 | -22.979888432 | -18.664729368 | 1 | 1 | 1 | # | ao  |
| 1615 | 10 | 1 | 1.575000  | -12.941955029 | -21.474661568 | 18.664729368  | 1 | 1 | 0 | # | ao  |
| 1616 | 10 | 1 | 1.575000  | -10.353605029 | -25.929211568 | 18.664729368  | 1 | 1 | 0 | # | ao  |
| 1617 | 10 | 2 | 0.425000  | -11.795449128 | -24.451832678 | -17.178884937 | 1 | 1 | 1 | # | ho  |
| 1618 | 10 | 2 | 0.425000  | -14.383799128 | 26.730017322  | -17.178884937 | 1 | 0 | 1 | # | ho  |
| 1619 | 10 | 2 | 0.425000  | -14.088050872 | -24.457267322 | 17.178884937  | 1 | 1 | 0 | # | ho  |
| 1620 | 10 | 2 | 0.425000  | -11.499700872 | -20.002717322 | 17.178884937  | 1 | 1 | 0 | # | ho  |
| 1621 | 10 | 3 | -1.050000 | -14.548785345 | -27.231598519 | 17.631577932  | 1 | 1 | 0 | # | ob  |
| 1622 | 10 | 3 | -1.050000 | -10.506582736 | -22.604003874 | 15.433153738  | 1 | 1 | 0 | # | ob  |
| 1623 | 10 | 3 | -1.050000 | -11.959855513 | -26.135450680 | 17.631368622  | 1 | 1 | 0 | # | ob  |
| 1624 | 10 | 3 | -1.050000 | -13.095260908 | -21.860389700 | 15.431920289  | 1 | 1 | 0 | # | ob  |
| 1625 | 10 | 3 | -1.050000 | -14.548205513 | -21.680900680 | 17.631368622  | 1 | 1 | 0 | # | ob  |
| 1626 | 10 | 3 | -1.050000 | -13.923644487 | -22.773649320 | -17.631368622 | 1 | 1 | 1 | # | ob  |
| 1627 | 10 | 3 | -1.050000 | -10.506910908 | -26.314939700 | 15.431920289  | 1 | 1 | 0 | # | ob  |
| 1628 | 10 | 3 | -1.050000 | -13.923064655 | -26.132051481 | -17.631577932 | 1 | 1 | 1 | # | ob  |
| 1629 | 10 | 3 | -1.050000 | -12.788567264 | -21.850546126 | -15.433153738 | 1 | 1 | 1 | # | ob  |
| 1630 | 10 | 3 | -1.050000 | -11.334714655 | -21.677501481 | -17.631577932 | 1 | 1 | 1 | # | ob  |
| 1631 | 10 | 3 | -1.050000 | -15.376917264 | -26.305096126 | -15.433153738 | 1 | 1 | 1 | # | ob  |
| 1632 | 10 | 3 | -1.050000 | -12.788239092 | -27.048710300 | -15.431920289 | 1 | 1 | 1 | # | ob  |
| 1633 | 10 | 6 | -0.950000 | -13.530842343 | 26.728240996  | -17.652417115 | 1 | 0 | 1 | # | oh  |
| 1634 | 10 | 3 | -1.050000 | -10.863018349 | 26.731276970  | -15.603517583 | 1 | 0 | 1 | # | ob  |
| 1635 | 10 | 6 | -0.950000 | -10.942492343 | -24.453609004 | -17.652417115 | 1 | 1 | 1 | # | oh  |
| 1636 | 10 | 3 | -1.050000 | -13.451368349 | -24.450573030 | -15.603517583 | 1 | 1 | 1 | # | ob  |
| 1637 | 10 | 4 | -0.950000 | -12.352657657 | -20.000940996 | 17.652417115  | 1 | 1 | 0 | # | oho |
| 1638 | 10 | 5 | -0.950000 | -15.020481651 | -20.003976970 | 15.603517583  | 1 | 1 | 0 | # | oht |
| 1639 | 10 | 6 | -0.950000 | -14.941007657 | -24.455490996 | 17.652417115  | 1 | 1 | 0 | # | oh  |
| 1640 | 10 | 3 | -1.050000 | -12.432131651 | -24.458526970 | 15.603517583  | 1 | 1 | 0 | # | ob  |
| 1641 | 10 | 3 | -1.050000 | -11.335294487 | -27.228199320 | -17.631368622 | 1 | 1 | 1 | # | ob  |
| 1642 | 10 | 3 | -1.050000 | -15.376589092 | -22.594160300 | -15.431920289 | 1 | 1 | 1 | # | ob  |
| 1643 | 10 | 3 | -1.050000 | -11.960435345 | -22.777048519 | 17.631577932  | 1 | 1 | 0 | # | ob  |
| 1644 | 10 | 3 | -1.050000 | -13.094932736 | -27.058553874 | 15.433153738  | 1 | 1 | 0 | # | ob  |
| 1645 | 10 | 7 | 2.100000  | -11.307102986 | -27.381980796 | -16.002222830 | 1 | 1 | 1 | # | st  |
| 1646 | 10 | 7 | 2.100000  | -11.988072226 | -22.935729218 | 16.003201903  | 1 | 1 | 0 | # | st  |
| 1647 | 10 | 7 | 2.100000  | -14.576397014 | -21.527119204 | 16.002222830  | 1 | 1 | 0 | # | st  |
| 1648 | 10 | 7 | 2.100000  | -11.988047014 | -25.981669204 | 16.002222830  | 1 | 1 | 0 | # | st  |
| 1649 | 10 | 7 | 2.100000  | -11.307077774 | -21.518820782 | -16.003201903 | 1 | 1 | 1 | # | st  |
| 1650 | 10 | 7 | 2.100000  | -13.895427774 | -25.973370782 | -16.003201903 | 1 | 1 | 1 | # | st  |
| 1651 | 10 | 7 | 2.100000  | -13.895452986 | -22.927430796 | -16.002222830 | 1 | 1 | 1 | # | st  |
| 1652 | 10 | 7 | 2.100000  | -14.576422226 | -27.390279218 | 16.003201903  | 1 | 1 | 0 | # | st  |
| 1653 | 10 | 5 | -0.950000 | -10.792633573 | -19.680858114 | -6.743779050  | 1 | 1 | 1 | # | oht |
| 1654 | 10 | 5 | -0.950000 | -15.225161797 | -0.272172439  | -12.134227113 | 1 | 0 | 1 | # | oht |
| 1655 | 10 | 2 | 0.425000  | 15.486672253  | -1.308055357  | -12.328360493 | 0 | 0 | 1 | # | ho  |
| 1656 | 10 | 2 | 0.425000  | -10.530111381 | -1.054326608  | -6.235429463  | 1 | 0 | 1 | # | ho  |
| 1657 | 10 | 2 | 0.425000  | -10.666251036 | -18.596754758 | -6.945886456  | 1 | 1 | 1 | # | ho  |
| 1658 | 10 | 2 | 0.425000  | -15.417051085 | -19.012312375 | -12.696363051 | 1 | 1 | 1 | # | ho  |
| 1659 | 11 | 1 | 1.575000  | -7.764844971  | 1.474661568   | -18.664729368 | 1 | 0 | 1 | # | ao  |
| 1660 | 11 | 1 | 1.575000  | -10.353194971 | 5.929211568   | -18.664729368 | 1 | 0 | 1 | # | ao  |
| 1661 | 11 | 1 | 1.575000  | -7.765255029  | 7.434438432   | 18.664729368  | 1 | 0 | 0 | # | ao  |
| 1662 | 11 | 1 | 1.575000  | -5.176905029  | 2.979888432   | 18.664729368  | 1 | 0 | 0 | # | ao  |
| 1663 | 11 | 2 | 0.425000  | -6.618749128  | 4.457267322   | -17.178884937 | 1 | 0 | 1 | # | ho  |
| 1664 | 11 | 2 | 0.425000  | -9.207099128  | 0.002717322   | -17.178884937 | 1 | 0 | 1 | # | ho  |
| 1665 | 11 | 2 | 0.425000  | -8.911350872  | 4.451832678   | 17.178884937  | 1 | 0 | 0 | # | ho  |
| 1666 | 11 | 2 | 0.425000  | -6.323000872  | 8.906382678   | 17.178884937  | 1 | 0 | 0 | # | ho  |
| 1667 | 11 | 3 | -1.050000 | -9.372085345  | 1.677501481   | 17.631577932  | 1 | 0 | 0 | # | ob  |
| 1668 | 11 | 3 | -1.050000 | -5.329882736  | 6.305096126   | 15.433153738  | 1 | 0 | 0 | # | ob  |
| 1669 | 11 | 3 | -1.050000 | -6.783155513  | 2.773649320   | 17.631368622  | 1 | 0 | 0 | # | ob  |
| 1670 | 11 | 3 | -1.050000 | -7.918560908  | 7.048710300   | 15.431920289  | 1 | 0 | 0 | # | ob  |
| 1671 | 11 | 3 | -1.050000 | -9.371505513  | 7.228199320   | 17.631368622  | 1 | 0 | 0 | # | ob  |
| 1672 | 11 | 3 | -1.050000 | -8.746944487  | 6.135450680   | -17.631368622 | 1 | 0 | 1 | # | ob  |
| 1673 | 11 | 3 | -1.050000 | -5.330210908  | 2.594160300   | 15.431920289  | 1 | 0 | 0 | # | ob  |
| 1674 | 11 | 3 | -1.050000 | -8.746364655  | 2.777048519   | -17.631577932 | 1 | 0 | 1 | # | ob  |
| 1675 | 11 | 3 | -1.050000 | -7.611867264  | 7.058553874   | -15.433153738 | 1 | 0 | 1 | # | ob  |
| 1676 | 11 | 3 | -1.050000 | -6.158014655  | 7.231598519   | -17.631577932 | 1 | 0 | 1 | # | ob  |
| 1677 | 11 | 3 | -1.050000 | -10.200217264 | 2.604003874   | -15.433153738 | 1 | 0 | 1 | # | ob  |
| 1678 | 11 | 3 | -1.050000 | -7.611539092  | 1.860389700   | -15.431920289 | 1 | 0 | 1 | # | ob  |
| 1679 | 11 | 4 | -0.950000 | -8.354142343  | 0.000940996   | -17.652417115 | 1 | 0 | 1 | # | oho |
| 1680 | 11 | 5 | -0.950000 | -5.686318349  | 0.003976970   | -15.603517583 | 1 | 0 | 1 | # | oht |
| 1681 | 11 | 6 | -0.950000 | -5.765792343  | 4.455490996   | -17.652417115 | 1 | 0 | 1 | # | oh  |
| 1682 | 11 | 3 | -1.050000 | -8.274668349  | 4.458526970   | -15.603517583 | 1 | 0 | 1 | # | ob  |
| 1683 | 11 | 6 | -0.950000 | -7.175957657  | 8.908159004   | 17.652417115  | 1 | 0 | 0 | # | oh  |
| 1684 | 11 | 3 | -1.050000 | -9.843781651  | 8.905123030   | 15.603517583  | 1 | 0 | 0 | # | ob  |
| 1685 | 11 | 6 | -0.950000 | -9.764307657  | 4.453609004   | 17.652417115  | 1 | 0 | 0 | # | oh  |
| 1686 | 11 | 3 | -1.050000 | -7.255431651  | 4.450573030   | 15.603517583  | 1 | 0 | 0 | # | ob  |
| 1687 | 11 | 3 | -1.050000 | -6.158594487  | 1.680900680   | -17.631368622 | 1 | 0 | 1 | # | ob  |
| 1688 | 11 | 3 | -1.050000 | -10.199889092 | 6.314939700   | -15.431920289 | 1 | 0 | 1 | # | ob  |
| 1689 | 11 | 3 | -1.050000 | -6.783735345  | 6.132051481   | 17.631577932  | 1 | 0 | 0 | # | ob  |
| 1690 | 11 | 3 | -1.050000 | -7.918232736  | 1.850546126   | 15.433153738  | 1 | 0 | 0 | # | ob  |
| 1691 | 11 | 7 | 2.100000  | -6.130402986  | 1.527119204   | -16.002222830 | 1 | 0 | 1 | # | st  |
| 1692 | 11 | 7 | 2.100000  | -6.811372226  | 5.973370782   | 16.003201903  | 1 | 0 | 0 | # | st  |
| 1693 | 11 | 7 | 2.100000  | -9.399697014  | 7.381980796   | 16.002222830  | 1 | 0 | 0 | # | st  |
| 1694 | 11 | 7 | 2.100000  | -6.811347014  | 2.927430796   | 16.002222830  | 1 | 0 | 0 | # | st  |
| 1695 | 11 | 7 | 2.100000  | -6.130377774  | 7.390279218   | -16.003201903 | 1 | 0 | 1 | # | st  |
| 1696 | 11 | 7 | 2.100000  | -8.718727774  | 2.935729218   | -16.003201903 | 1 | 0 | 1 | # | st  |
| 1697 | 11 | 7 | 2.100000  | -8.718752986  | 5.981669204   | -16.002222830 | 1 | 0 | 1 | # | st  |
| 1698 | 11 | 7 | 2.100000  | -9.399722226  | 1.518820782   | 16.003201903  | 1 | 0 | 0 | # | st  |
| 1699 | 11 | 1 | 1.575000  | -7.764844971  | 10.383761568  | -18.664729368 | 1 | 0 | 1 | # | ao  |
| 1700 | 11 | 1 | 1.575000  | -10.353194971 | 14.838311568  | -18.664729368 | 1 | 0 | 1 | # | ao  |
| 1701 | 11 | 1 | 1.575000  | -7.765255029  | 16.343538432  | 18.664729368  | 1 | 0 | 0 | # | ao  |
| 1702 | 11 | 1 | 1.575000  | -5.176905029  | 11.888988432  | 18.664729368  | 1 | 0 | 0 | # | ao  |
| 1703 | 11 | 2 | 0.425000  | -6.618749128  | 13.366367322  | -17.178884937 | 1 | 0 | 1 | # | ho  |

|      |    |   |           |               |               |               |   |   |   |   |    |
|------|----|---|-----------|---------------|---------------|---------------|---|---|---|---|----|
| 1704 | 11 | 2 | 0.425000  | -9.207099128  | 8.911817322   | -17.178884937 | 1 | 0 | 1 | # | ho |
| 1705 | 11 | 2 | 0.425000  | -8.911350872  | 13.360932678  | 17.178884937  | 1 | 0 | 0 | # | ho |
| 1706 | 11 | 2 | 0.425000  | -6.323000872  | 17.815482678  | 17.178884937  | 1 | 0 | 0 | # | ho |
| 1707 | 11 | 3 | -1.050000 | -9.372085345  | 10.586601481  | 17.631577932  | 1 | 0 | 0 | # | ob |
| 1708 | 11 | 3 | -1.050000 | -5.329882736  | 15.214196126  | 15.433153738  | 1 | 0 | 0 | # | ob |
| 1709 | 11 | 3 | -1.050000 | -6.783155513  | 11.682749320  | 17.631368622  | 1 | 0 | 0 | # | ob |
| 1710 | 11 | 3 | -1.050000 | -7.918560908  | 15.957810300  | 15.431920289  | 1 | 0 | 0 | # | ob |
| 1711 | 11 | 3 | -1.050000 | -9.371505513  | 16.137299320  | 17.631368622  | 1 | 0 | 0 | # | ob |
| 1712 | 11 | 3 | -1.050000 | -8.746944487  | 15.044550680  | -17.631368622 | 1 | 0 | 1 | # | ob |
| 1713 | 11 | 3 | -1.050000 | -5.330210908  | 11.503260300  | 15.431920289  | 1 | 0 | 0 | # | ob |
| 1714 | 11 | 3 | -1.050000 | -8.746364655  | 11.686148519  | -17.631577932 | 1 | 0 | 1 | # | ob |
| 1715 | 11 | 3 | -1.050000 | -7.611867264  | 15.967653874  | -15.433153738 | 1 | 0 | 1 | # | ob |
| 1716 | 11 | 3 | -1.050000 | -6.158014655  | 16.140698519  | -17.631577932 | 1 | 0 | 1 | # | ob |
| 1717 | 11 | 3 | -1.050000 | -10.200217264 | 11.513103874  | -15.433153738 | 1 | 0 | 1 | # | ob |
| 1718 | 11 | 3 | -1.050000 | -7.611539092  | 10.769489700  | -15.431920289 | 1 | 0 | 1 | # | ob |
| 1719 | 11 | 6 | -0.950000 | -8.354142343  | 8.910040996   | -17.652417115 | 1 | 0 | 1 | # | oh |
| 1720 | 11 | 3 | -1.050000 | -5.686318349  | 8.913076970   | -15.603517583 | 1 | 0 | 1 | # | ob |
| 1721 | 11 | 6 | -0.950000 | -5.765792343  | 13.364590996  | -17.652417115 | 1 | 0 | 1 | # | oh |
| 1722 | 11 | 3 | -1.050000 | -8.274668349  | 13.367626970  | -15.603517583 | 1 | 0 | 1 | # | ob |
| 1723 | 11 | 6 | -0.950000 | -7.175957657  | 17.817259004  | 17.652417115  | 1 | 0 | 0 | # | oh |
| 1724 | 11 | 3 | -1.050000 | -9.843781651  | 17.814223030  | 15.603517583  | 1 | 0 | 0 | # | ob |
| 1725 | 11 | 6 | -0.950000 | -9.764307657  | 13.362709004  | 17.652417115  | 1 | 0 | 0 | # | oh |
| 1726 | 11 | 3 | -1.050000 | -7.255431651  | 13.359673030  | 15.603517583  | 1 | 0 | 0 | # | ob |
| 1727 | 11 | 3 | -1.050000 | -6.158594487  | 10.590000680  | -17.631368622 | 1 | 0 | 1 | # | ob |
| 1728 | 11 | 3 | -1.050000 | -10.199889092 | 15.224039700  | -15.431920289 | 1 | 0 | 1 | # | ob |
| 1729 | 11 | 3 | -1.050000 | -6.783735345  | 15.041151481  | 17.631577932  | 1 | 0 | 0 | # | ob |
| 1730 | 11 | 3 | -1.050000 | -7.918232736  | 10.759646126  | 15.433153738  | 1 | 0 | 0 | # | ob |
| 1731 | 11 | 7 | 2.100000  | -6.130402986  | 10.436219204  | -16.002222830 | 1 | 0 | 1 | # | st |
| 1732 | 11 | 7 | 2.100000  | -6.811372226  | 14.882470782  | 16.003201903  | 1 | 0 | 0 | # | st |
| 1733 | 11 | 7 | 2.100000  | -9.399697014  | 16.291080796  | 16.002222830  | 1 | 0 | 0 | # | st |
| 1734 | 11 | 7 | 2.100000  | -6.811347014  | 11.836530796  | 16.002222830  | 1 | 0 | 0 | # | st |
| 1735 | 11 | 7 | 2.100000  | -6.130377774  | 16.299379218  | -16.003201903 | 1 | 0 | 1 | # | st |
| 1736 | 11 | 7 | 2.100000  | -8.718727774  | 11.844829218  | -16.003201903 | 1 | 0 | 1 | # | st |
| 1737 | 11 | 7 | 2.100000  | -8.718752986  | 14.890769204  | -16.002222830 | 1 | 0 | 1 | # | st |
| 1738 | 11 | 7 | 2.100000  | -9.399722226  | 10.427920782  | 16.003201903  | 1 | 0 | 0 | # | st |
| 1739 | 11 | 1 | 1.575000  | -7.764844971  | 19.292861568  | -18.664729368 | 1 | 0 | 1 | # | ao |
| 1740 | 11 | 1 | 1.575000  | -10.353194971 | 23.747411568  | -18.664729368 | 1 | 0 | 1 | # | ao |
| 1741 | 11 | 1 | 1.575000  | -7.765255029  | 25.252638432  | 18.664729368  | 1 | 0 | 0 | # | ao |
| 1742 | 11 | 1 | 1.575000  | -5.176905029  | 20.798088432  | 18.664729368  | 1 | 0 | 0 | # | ao |
| 1743 | 11 | 2 | 0.425000  | -6.618749128  | 22.275467322  | -17.178884937 | 1 | 0 | 1 | # | ho |
| 1744 | 11 | 2 | 0.425000  | -9.207099128  | 17.820917322  | -17.178884937 | 1 | 0 | 1 | # | ho |
| 1745 | 11 | 2 | 0.425000  | -8.911350872  | 22.270032678  | 17.178884937  | 1 | 0 | 0 | # | ho |
| 1746 | 11 | 2 | 0.425000  | -6.323000872  | 26.724582678  | 17.178884937  | 1 | 0 | 0 | # | ho |
| 1747 | 11 | 3 | -1.050000 | -9.372085345  | 19.495701481  | 17.631577932  | 1 | 0 | 0 | # | ob |
| 1748 | 11 | 3 | -1.050000 | -5.329882736  | 24.123296126  | 15.433153738  | 1 | 0 | 0 | # | ob |
| 1749 | 11 | 3 | -1.050000 | -6.783155513  | 20.591849320  | 17.631368622  | 1 | 0 | 0 | # | ob |
| 1750 | 11 | 3 | -1.050000 | -7.918560908  | 24.866910300  | 15.431920289  | 1 | 0 | 0 | # | ob |
| 1751 | 11 | 3 | -1.050000 | -9.371505513  | 25.046399320  | 17.631368622  | 1 | 0 | 0 | # | ob |
| 1752 | 11 | 3 | -1.050000 | -8.746944487  | 23.953650680  | -17.631368622 | 1 | 0 | 1 | # | ob |
| 1753 | 11 | 3 | -1.050000 | -5.330210908  | 20.412360300  | 15.431920289  | 1 | 0 | 0 | # | ob |
| 1754 | 11 | 3 | -1.050000 | -8.746364655  | 20.595248519  | -17.631577932 | 1 | 0 | 1 | # | ob |
| 1755 | 11 | 3 | -1.050000 | -7.611867264  | 24.876753874  | -15.433153738 | 1 | 0 | 1 | # | ob |
| 1756 | 11 | 3 | -1.050000 | -6.158014655  | 25.049798519  | -17.631577932 | 1 | 0 | 1 | # | ob |
| 1757 | 11 | 3 | -1.050000 | -10.200217264 | 20.422203874  | -15.433153738 | 1 | 0 | 1 | # | ob |
| 1758 | 11 | 3 | -1.050000 | -7.611539092  | 19.678589700  | -15.431920289 | 1 | 0 | 1 | # | ob |
| 1759 | 11 | 6 | -0.950000 | -8.354142343  | 17.819140996  | -17.652417115 | 1 | 0 | 1 | # | oh |
| 1760 | 11 | 3 | -1.050000 | -5.686318349  | 17.822176970  | -15.603517583 | 1 | 0 | 1 | # | ob |
| 1761 | 11 | 6 | -0.950000 | -5.765792343  | 22.273690996  | -17.652417115 | 1 | 0 | 1 | # | oh |
| 1762 | 11 | 3 | -1.050000 | -8.274668349  | 22.276726970  | -15.603517583 | 1 | 0 | 1 | # | ob |
| 1763 | 11 | 6 | -0.950000 | -7.175957657  | 26.726359004  | 17.652417115  | 1 | 0 | 0 | # | oh |
| 1764 | 11 | 3 | -1.050000 | -9.843781651  | 26.723323030  | 15.603517583  | 1 | 0 | 0 | # | ob |
| 1765 | 11 | 6 | -0.950000 | -9.764307657  | 22.271809004  | 17.652417115  | 1 | 0 | 0 | # | oh |
| 1766 | 11 | 3 | -1.050000 | -7.255431651  | 22.268773030  | 15.603517583  | 1 | 0 | 0 | # | ob |
| 1767 | 11 | 3 | -1.050000 | -6.158594487  | 19.499100680  | -17.631368622 | 1 | 0 | 1 | # | ob |
| 1768 | 11 | 3 | -1.050000 | -10.199889092 | 24.133139700  | -15.431920289 | 1 | 0 | 1 | # | ob |
| 1769 | 11 | 3 | -1.050000 | -6.783735345  | 23.950251481  | 17.631577932  | 1 | 0 | 0 | # | ob |
| 1770 | 11 | 3 | -1.050000 | -7.918232736  | 19.668746126  | 15.433153738  | 1 | 0 | 0 | # | ob |
| 1771 | 11 | 7 | 2.100000  | -6.130402986  | 19.345319204  | -16.002222830 | 1 | 0 | 1 | # | st |
| 1772 | 11 | 7 | 2.100000  | -6.811372226  | 23.791570782  | 16.003201903  | 1 | 0 | 0 | # | st |
| 1773 | 11 | 7 | 2.100000  | -9.399697014  | 25.200180796  | 16.002222830  | 1 | 0 | 0 | # | st |
| 1774 | 11 | 7 | 2.100000  | -6.811347014  | 20.745630796  | 16.002222830  | 1 | 0 | 0 | # | st |
| 1775 | 11 | 7 | 2.100000  | -6.130377774  | 25.208479218  | -16.003201903 | 1 | 0 | 1 | # | st |
| 1776 | 11 | 7 | 2.100000  | -8.718727774  | 20.753929218  | -16.003201903 | 1 | 0 | 1 | # | st |
| 1777 | 11 | 7 | 2.100000  | -8.718752986  | 23.799869204  | -16.002222830 | 1 | 0 | 1 | # | st |
| 1778 | 11 | 7 | 2.100000  | -9.399722226  | 19.337020782  | 16.003201903  | 1 | 0 | 0 | # | st |
| 1779 | 11 | 1 | 1.575000  | -7.764844971  | -27.434438432 | -18.664729368 | 1 | 1 | 1 | # | ao |
| 1780 | 11 | 1 | 1.575000  | -10.353194971 | -22.979888432 | -18.664729368 | 1 | 1 | 1 | # | ao |
| 1781 | 11 | 1 | 1.575000  | -7.765255029  | -21.474661568 | 18.664729368  | 1 | 1 | 0 | # | ao |
| 1782 | 11 | 1 | 1.575000  | -5.176905029  | -25.929211568 | 18.664729368  | 1 | 1 | 0 | # | ao |
| 1783 | 11 | 2 | 0.425000  | -6.618749128  | -24.451832678 | -17.178884937 | 1 | 0 | 1 | # | ho |
| 1784 | 11 | 2 | 0.425000  | -9.207099128  | 26.730017322  | -17.178884937 | 1 | 0 | 1 | # | ho |
| 1785 | 11 | 2 | 0.425000  | -8.911350872  | -24.457267322 | 17.178884937  | 1 | 0 | 0 | # | ho |
| 1786 | 11 | 2 | 0.425000  | -6.323000872  | -20.002717322 | 17.178884937  | 1 | 0 | 0 | # | ho |
| 1787 | 11 | 3 | -1.050000 | -9.372085345  | -27.231598519 | 17.631577932  | 1 | 0 | 0 | # | ob |
| 1788 | 11 | 3 | -1.050000 | -5.329882736  | -22.604003874 | 15.433153738  | 1 | 0 | 0 | # | ob |
| 1789 | 11 | 3 | -1.050000 | -6.783155513  | -26.135450680 | 17.631368622  | 1 | 0 | 0 | # | ob |
| 1790 | 11 | 3 | -1.050000 | -7.918560908  | -21.860389700 | 15.431920289  | 1 | 0 | 0 | # | ob |
| 1791 | 11 | 3 | -1.050000 | -9.371505513  | -21.680900680 | 17.631368622  | 1 | 0 | 0 | # | ob |
| 1792 | 11 | 3 | -1.050000 | -8.746944487  | -22.773649320 | -17.631368622 | 1 | 0 | 1 | # | ob |
| 1793 | 11 | 3 | -1.050000 | -5.330210908  | -26.314939700 | 15.431920289  | 1 | 0 | 0 | # | ob |
| 1794 | 11 | 3 | -1.050000 | -8.746364655  | -26.132051481 | -17.631577932 | 1 | 0 | 1 | # | ob |
| 1795 | 11 | 3 | -1.050000 | -7.611867264  | -21.850546126 | -15.433153738 | 1 | 0 | 1 | # | ob |
| 1796 | 11 | 3 | -1.050000 | -6.158014655  | -21.677501481 | -17.631577932 | 1 | 0 | 1 | # | ob |

|      |    |   |           |               |               |               |   |   |   |   |     |
|------|----|---|-----------|---------------|---------------|---------------|---|---|---|---|-----|
| 1797 | 11 | 3 | -1.050000 | -10.200217264 | -26.305096126 | -15.433153738 | 1 | 1 | 1 | # | ob  |
| 1798 | 11 | 3 | -1.050000 | -7.611539092  | -27.048710300 | -15.431920289 | 1 | 1 | 1 | # | ob  |
| 1799 | 11 | 6 | -0.950000 | -8.354142343  | 26.728240996  | -17.652417115 | 1 | 0 | 1 | # | oh  |
| 1800 | 11 | 3 | -1.050000 | -5.686318349  | 26.731276970  | -15.603517583 | 1 | 0 | 1 | # | ob  |
| 1801 | 11 | 6 | -0.950000 | -5.765792343  | -24.453609004 | -17.652417115 | 1 | 1 | 1 | # | oh  |
| 1802 | 11 | 3 | -1.050000 | -8.274668349  | -24.450573030 | -15.603517583 | 1 | 1 | 1 | # | ob  |
| 1803 | 11 | 4 | -0.950000 | -7.175957657  | -20.000940996 | 17.652417115  | 1 | 1 | 0 | # | oho |
| 1804 | 11 | 5 | -0.950000 | -9.843781651  | -20.003976970 | 15.603517583  | 1 | 1 | 0 | # | oht |
| 1805 | 11 | 6 | -0.950000 | -9.764307657  | -24.455490996 | 17.652417115  | 1 | 1 | 0 | # | oh  |
| 1806 | 11 | 3 | -1.050000 | -7.255431651  | -24.458526970 | 15.603517583  | 1 | 1 | 0 | # | ob  |
| 1807 | 11 | 3 | -1.050000 | -6.158594487  | -27.228199320 | -17.631368622 | 1 | 1 | 1 | # | ob  |
| 1808 | 11 | 3 | -1.050000 | -10.199889092 | -22.594160300 | -15.431920289 | 1 | 1 | 1 | # | ob  |
| 1809 | 11 | 3 | -1.050000 | -6.783735345  | -22.777048519 | 17.631577932  | 1 | 1 | 0 | # | ob  |
| 1810 | 11 | 3 | -1.050000 | -7.918232736  | -27.058553874 | 15.433153738  | 1 | 1 | 0 | # | ob  |
| 1811 | 11 | 7 | 2.100000  | -6.130402986  | -27.381980796 | -16.002222830 | 1 | 1 | 1 | # | st  |
| 1812 | 11 | 7 | 2.100000  | -6.811372226  | -22.935729218 | 16.003201903  | 1 | 1 | 0 | # | st  |
| 1813 | 11 | 7 | 2.100000  | -9.399697014  | -21.527119204 | 16.002222830  | 1 | 1 | 0 | # | st  |
| 1814 | 11 | 7 | 2.100000  | -6.811347014  | -25.981669204 | 16.002222830  | 1 | 1 | 0 | # | st  |
| 1815 | 11 | 7 | 2.100000  | -6.130377774  | -21.518820782 | -16.003201903 | 1 | 1 | 1 | # | st  |
| 1816 | 11 | 7 | 2.100000  | -8.718727774  | -25.973370782 | -16.003201903 | 1 | 1 | 1 | # | st  |
| 1817 | 11 | 7 | 2.100000  | -8.718752986  | -22.927430796 | -16.002222830 | 1 | 1 | 1 | # | st  |
| 1818 | 11 | 7 | 2.100000  | -9.399722226  | -27.390279218 | 16.003201903  | 1 | 1 | 0 | # | st  |
| 1819 | 11 | 5 | -0.950000 | -5.615933573  | -19.680858114 | -6.743779050  | 1 | 1 | 1 | # | oht |
| 1820 | 11 | 5 | -0.950000 | -10.048461797 | -0.272172439  | -12.134227113 | 1 | 0 | 1 | # | oht |
| 1821 | 11 | 2 | 0.425000  | -10.396827747 | -1.308055357  | -12.328360493 | 1 | 0 | 1 | # | ho  |
| 1822 | 11 | 2 | 0.425000  | -5.353411381  | -1.054326608  | -6.235429463  | 1 | 0 | 1 | # | ho  |
| 1823 | 11 | 2 | 0.425000  | -5.489551036  | -18.596754758 | -6.945886456  | 1 | 1 | 1 | # | ho  |
| 1824 | 11 | 2 | 0.425000  | -10.240351085 | -19.012312375 | -12.696363051 | 1 | 1 | 1 | # | ho  |
| 1825 | 12 | 1 | 1.575000  | -2.588144971  | 1.474661568   | -18.664729368 | 1 | 0 | 1 | # | ao  |
| 1826 | 12 | 1 | 1.575000  | -5.176494971  | 5.929211568   | -18.664729368 | 1 | 0 | 1 | # | ao  |
| 1827 | 12 | 1 | 1.575000  | -2.588555029  | 7.434438432   | 18.664729368  | 1 | 0 | 0 | # | ao  |
| 1828 | 12 | 1 | 1.575000  | -0.000205029  | 2.979888432   | 18.664729368  | 1 | 0 | 0 | # | ao  |
| 1829 | 12 | 2 | 0.425000  | -1.442049128  | 4.457267322   | -17.178884937 | 1 | 0 | 1 | # | ho  |
| 1830 | 12 | 2 | 0.425000  | -4.030399128  | 0.002717322   | -17.178884937 | 1 | 0 | 1 | # | ho  |
| 1831 | 12 | 2 | 0.425000  | -3.734650872  | 4.451832678   | 17.178884937  | 1 | 0 | 0 | # | ho  |
| 1832 | 12 | 2 | 0.425000  | -1.146300872  | 8.906382678   | 17.178884937  | 1 | 0 | 0 | # | ho  |
| 1833 | 12 | 3 | -1.050000 | -4.195385345  | 1.677501481   | 17.631577932  | 1 | 0 | 0 | # | ob  |
| 1834 | 12 | 3 | -1.050000 | -0.153182736  | 6.305096126   | 15.433153738  | 1 | 0 | 0 | # | ob  |
| 1835 | 12 | 3 | -1.050000 | -1.606455513  | 2.773649320   | 17.631368622  | 1 | 0 | 0 | # | ob  |
| 1836 | 12 | 3 | -1.050000 | -2.741860908  | 7.048710300   | 15.431920289  | 1 | 0 | 0 | # | ob  |
| 1837 | 12 | 3 | -1.050000 | -4.194805513  | 7.228199320   | 17.631368622  | 1 | 0 | 0 | # | ob  |
| 1838 | 12 | 3 | -1.050000 | -3.570244487  | 6.135450680   | -17.631368622 | 1 | 0 | 1 | # | ob  |
| 1839 | 12 | 3 | -1.050000 | -0.153510908  | 2.594160300   | 15.431920289  | 1 | 0 | 0 | # | ob  |
| 1840 | 12 | 3 | -1.050000 | -3.569664655  | 2.777048519   | -17.631577932 | 1 | 0 | 1 | # | ob  |
| 1841 | 12 | 3 | -1.050000 | -2.435167264  | 7.058553874   | -15.433153738 | 1 | 0 | 1 | # | ob  |
| 1842 | 12 | 3 | -1.050000 | -0.981314655  | 7.231598519   | -17.631577932 | 1 | 0 | 1 | # | ob  |
| 1843 | 12 | 3 | -1.050000 | -5.023517264  | 2.604003874   | -15.433153738 | 1 | 0 | 1 | # | ob  |
| 1844 | 12 | 3 | -1.050000 | -2.434839092  | 1.860389700   | -15.431920289 | 1 | 0 | 1 | # | ob  |
| 1845 | 12 | 4 | -0.950000 | -3.177442343  | 0.000940996   | -17.652417115 | 1 | 0 | 1 | # | oho |
| 1846 | 12 | 5 | -0.950000 | -0.509618349  | 0.003976970   | -15.603517583 | 1 | 0 | 1 | # | oht |
| 1847 | 12 | 6 | -0.950000 | -0.589092343  | 4.455490996   | -17.652417115 | 1 | 0 | 1 | # | oh  |
| 1848 | 12 | 3 | -1.050000 | -3.097968349  | 4.458526970   | -15.603517583 | 1 | 0 | 1 | # | ob  |
| 1849 | 12 | 6 | -0.950000 | -1.999257657  | 8.908159004   | 17.652417115  | 1 | 0 | 0 | # | oh  |
| 1850 | 12 | 3 | -1.050000 | -4.667081651  | 8.905123030   | 15.603517583  | 1 | 0 | 0 | # | ob  |
| 1851 | 12 | 6 | -0.950000 | -4.587607657  | 4.453609004   | 17.652417115  | 1 | 0 | 0 | # | oh  |
| 1852 | 12 | 3 | -1.050000 | -2.078731651  | 4.450573030   | 15.603517583  | 1 | 0 | 0 | # | ob  |
| 1853 | 12 | 3 | -1.050000 | -0.981894487  | 1.680900680   | -17.631368622 | 1 | 0 | 1 | # | ob  |
| 1854 | 12 | 3 | -1.050000 | -5.023189092  | 6.314939700   | -15.431920289 | 1 | 0 | 1 | # | ob  |
| 1855 | 12 | 3 | -1.050000 | -1.607035345  | 6.132051481   | 17.631577932  | 1 | 0 | 0 | # | ob  |
| 1856 | 12 | 3 | -1.050000 | -2.741532736  | 1.850546126   | 15.433153738  | 1 | 0 | 0 | # | ob  |
| 1857 | 12 | 7 | 2.100000  | -0.953702986  | 1.527119204   | -16.002222830 | 1 | 0 | 1 | # | st  |
| 1858 | 12 | 7 | 2.100000  | -1.634672226  | 5.973370782   | 16.003201903  | 1 | 0 | 0 | # | st  |
| 1859 | 12 | 7 | 2.100000  | -4.222997014  | 7.381980796   | 16.002222830  | 1 | 0 | 0 | # | st  |
| 1860 | 12 | 7 | 2.100000  | -1.634647014  | 2.927430796   | 16.002222830  | 1 | 0 | 0 | # | st  |
| 1861 | 12 | 7 | 2.100000  | -0.953677774  | 7.390279218   | -16.003201903 | 1 | 0 | 1 | # | st  |
| 1862 | 12 | 7 | 2.100000  | -3.542027774  | 2.935729218   | -16.003201903 | 1 | 0 | 1 | # | st  |
| 1863 | 12 | 7 | 2.100000  | -3.542052986  | 5.981669204   | -16.002222830 | 1 | 0 | 1 | # | st  |
| 1864 | 12 | 7 | 2.100000  | -4.223022226  | 1.518820782   | 16.003201903  | 1 | 0 | 0 | # | st  |
| 1865 | 12 | 1 | 1.575000  | -2.588144971  | 10.383761568  | -18.664729368 | 1 | 0 | 1 | # | ao  |
| 1866 | 12 | 1 | 1.575000  | -5.176494971  | 14.838311568  | -18.664729368 | 1 | 0 | 1 | # | ao  |
| 1867 | 12 | 1 | 1.575000  | -2.588555029  | 16.343538432  | 18.664729368  | 1 | 0 | 0 | # | ao  |
| 1868 | 12 | 1 | 1.575000  | -0.000205029  | 11.888988432  | 18.664729368  | 1 | 0 | 0 | # | ao  |
| 1869 | 12 | 2 | 0.425000  | -1.442049128  | 13.366367322  | -17.178884937 | 1 | 0 | 1 | # | ho  |
| 1870 | 12 | 2 | 0.425000  | -4.030399128  | 8.911817322   | -17.178884937 | 1 | 0 | 1 | # | ho  |
| 1871 | 12 | 2 | 0.425000  | -3.734650872  | 13.360932678  | 17.178884937  | 1 | 0 | 0 | # | ho  |
| 1872 | 12 | 2 | 0.425000  | -1.146300872  | 17.815482678  | 17.178884937  | 1 | 0 | 0 | # | ho  |
| 1873 | 12 | 3 | -1.050000 | -4.195385345  | 10.586601481  | 17.631577932  | 1 | 0 | 0 | # | ob  |
| 1874 | 12 | 3 | -1.050000 | -0.153182736  | 15.214196126  | 15.433153738  | 1 | 0 | 0 | # | ob  |
| 1875 | 12 | 3 | -1.050000 | -1.606455513  | 11.682749320  | 17.631368622  | 1 | 0 | 0 | # | ob  |
| 1876 | 12 | 3 | -1.050000 | -2.741860908  | 15.957810300  | 15.431920289  | 1 | 0 | 0 | # | ob  |
| 1877 | 12 | 3 | -1.050000 | -4.194805513  | 16.137299320  | 17.631368622  | 1 | 0 | 0 | # | ob  |
| 1878 | 12 | 3 | -1.050000 | -3.570244487  | 15.044550680  | -17.631368622 | 1 | 0 | 1 | # | ob  |
| 1879 | 12 | 3 | -1.050000 | -0.153510908  | 11.503260300  | 15.431920289  | 1 | 0 | 0 | # | ob  |
| 1880 | 12 | 3 | -1.050000 | -3.569664655  | 11.686148519  | -17.631577932 | 1 | 0 | 1 | # | ob  |
| 1881 | 12 | 3 | -1.050000 | -2.435167264  | 15.967653874  | -15.433153738 | 1 | 0 | 1 | # | ob  |
| 1882 | 12 | 3 | -1.050000 | -0.981314655  | 16.140698519  | -17.631577932 | 1 | 0 | 1 | # | ob  |
| 1883 | 12 | 3 | -1.050000 | -5.023517264  | 11.513103874  | -15.433153738 | 1 | 0 | 1 | # | ob  |
| 1884 | 12 | 3 | -1.050000 | -2.434839092  | 10.769489700  | -15.431920289 | 1 | 0 | 1 | # | ob  |
| 1885 | 12 | 6 | -0.950000 | -3.177442343  | 8.910040996   | -17.652417115 | 1 | 0 | 1 | # | oh  |
| 1886 | 12 | 3 | -1.050000 | -0.509618349  | 8.913076970   | -15.603517583 | 1 | 0 | 1 | # | ob  |
| 1887 | 12 | 6 | -0.950000 | -0.589092343  | 13.364590996  | -17.652417115 | 1 | 0 | 1 | # | oh  |
| 1888 | 12 | 3 | -1.050000 | -3.097968349  | 13.367626970  | -15.603517583 | 1 | 0 | 1 | # | ob  |
| 1889 | 12 | 6 | -0.950000 | -1.999257657  | 17.817259004  | 17.652417115  | 1 | 0 | 0 | # | oh  |

|      |    |   |           |              |               |               |   |   |   |   |     |
|------|----|---|-----------|--------------|---------------|---------------|---|---|---|---|-----|
| 1890 | 12 | 3 | -1.050000 | -4.667081651 | 17.814223030  | 15.603517583  | 1 | 0 | 0 | # | ob  |
| 1891 | 12 | 6 | -0.950000 | -4.587607657 | 13.362709004  | 17.652417115  | 1 | 0 | 0 | # | oh  |
| 1892 | 12 | 3 | -1.050000 | -2.078731651 | 13.359673030  | 15.603517583  | 1 | 0 | 0 | # | ob  |
| 1893 | 12 | 3 | -1.050000 | -0.981894487 | 10.590000680  | -17.631368622 | 1 | 0 | 1 | # | ob  |
| 1894 | 12 | 3 | -1.050000 | -5.023189092 | 15.224039700  | -15.431920289 | 1 | 0 | 1 | # | ob  |
| 1895 | 12 | 3 | -1.050000 | -1.607035345 | 15.041151481  | 17.631577932  | 1 | 0 | 0 | # | ob  |
| 1896 | 12 | 3 | -1.050000 | -2.741532736 | 10.759646126  | 15.433153738  | 1 | 0 | 0 | # | ob  |
| 1897 | 12 | 7 | 2.100000  | -0.953702986 | 10.436219204  | -16.002222830 | 1 | 0 | 1 | # | st  |
| 1898 | 12 | 7 | 2.100000  | -1.634672226 | 14.882470782  | 16.003201903  | 1 | 0 | 0 | # | st  |
| 1899 | 12 | 7 | 2.100000  | -4.222997014 | 16.291080796  | 16.002222830  | 1 | 0 | 0 | # | st  |
| 1900 | 12 | 7 | 2.100000  | -1.634647014 | 11.836530796  | 16.002222830  | 1 | 0 | 0 | # | st  |
| 1901 | 12 | 7 | 2.100000  | -0.953677774 | 16.299379218  | -16.003201903 | 1 | 0 | 1 | # | st  |
| 1902 | 12 | 7 | 2.100000  | -3.542027774 | 11.844829218  | -16.003201903 | 1 | 0 | 1 | # | st  |
| 1903 | 12 | 7 | 2.100000  | -3.542052986 | 14.890769204  | -16.002222830 | 1 | 0 | 1 | # | st  |
| 1904 | 12 | 7 | 2.100000  | -4.223022226 | 10.427920782  | 16.003201903  | 1 | 0 | 0 | # | st  |
| 1905 | 12 | 1 | 1.575000  | -2.588144971 | 19.292861568  | -18.664729368 | 1 | 0 | 1 | # | ao  |
| 1906 | 12 | 1 | 1.575000  | -5.176494971 | 23.747411568  | -18.664729368 | 1 | 0 | 1 | # | ao  |
| 1907 | 12 | 1 | 1.575000  | -2.588555029 | 25.252638432  | 18.664729368  | 1 | 0 | 0 | # | ao  |
| 1908 | 12 | 1 | 1.575000  | -0.000205029 | 20.798088432  | 18.664729368  | 1 | 0 | 0 | # | ao  |
| 1909 | 12 | 2 | 0.425000  | -1.442049128 | 22.275467322  | -17.178884937 | 1 | 0 | 1 | # | ho  |
| 1910 | 12 | 2 | 0.425000  | -4.030399128 | 17.820917322  | -17.178884937 | 1 | 0 | 1 | # | ho  |
| 1911 | 12 | 2 | 0.425000  | -3.734650872 | 22.270032678  | 17.178884937  | 1 | 0 | 0 | # | ho  |
| 1912 | 12 | 2 | 0.425000  | -1.146300872 | 26.724582678  | 17.178884937  | 1 | 0 | 0 | # | ho  |
| 1913 | 12 | 3 | -1.050000 | -4.195385345 | 19.495701481  | 17.631577932  | 1 | 0 | 0 | # | ob  |
| 1914 | 12 | 3 | -1.050000 | -0.153182736 | 24.123296126  | 15.433153738  | 1 | 0 | 0 | # | ob  |
| 1915 | 12 | 3 | -1.050000 | -1.606455513 | 20.591849320  | 17.631368622  | 1 | 0 | 0 | # | ob  |
| 1916 | 12 | 3 | -1.050000 | -2.741860908 | 24.866910300  | 15.431920289  | 1 | 0 | 0 | # | ob  |
| 1917 | 12 | 3 | -1.050000 | -4.194805513 | 25.046399320  | 17.631368622  | 1 | 0 | 0 | # | ob  |
| 1918 | 12 | 3 | -1.050000 | -3.570244487 | 23.953650680  | -17.631368622 | 1 | 0 | 1 | # | ob  |
| 1919 | 12 | 3 | -1.050000 | -0.153510908 | 20.412360300  | 15.431920289  | 1 | 0 | 0 | # | ob  |
| 1920 | 12 | 3 | -1.050000 | -3.569664655 | 20.595248519  | -17.631577932 | 1 | 0 | 1 | # | ob  |
| 1921 | 12 | 3 | -1.050000 | -2.435167264 | 24.876753874  | -15.433153738 | 1 | 0 | 1 | # | ob  |
| 1922 | 12 | 3 | -1.050000 | -0.981314655 | 25.049798519  | -17.631577932 | 1 | 0 | 1 | # | ob  |
| 1923 | 12 | 3 | -1.050000 | -5.023517264 | 20.422203874  | -15.433153738 | 1 | 0 | 1 | # | ob  |
| 1924 | 12 | 3 | -1.050000 | -2.434839092 | 19.678589700  | -15.431920289 | 1 | 0 | 1 | # | ob  |
| 1925 | 12 | 6 | -0.950000 | -3.177442343 | 17.819140996  | -17.652417115 | 1 | 0 | 1 | # | oh  |
| 1926 | 12 | 3 | -1.050000 | -0.509618349 | 17.822176970  | -15.603517583 | 1 | 0 | 1 | # | ob  |
| 1927 | 12 | 6 | -0.950000 | -0.589092343 | 22.273690996  | -17.652417115 | 1 | 0 | 1 | # | oh  |
| 1928 | 12 | 3 | -1.050000 | -3.097968349 | 22.276726970  | -15.603517583 | 1 | 0 | 1 | # | ob  |
| 1929 | 12 | 6 | -0.950000 | -1.999257657 | 26.726359004  | 17.652417115  | 1 | 0 | 0 | # | oh  |
| 1930 | 12 | 3 | -1.050000 | -4.667081651 | 26.723323030  | 15.603517583  | 1 | 0 | 0 | # | ob  |
| 1931 | 12 | 6 | -0.950000 | -4.587607657 | 22.271809004  | 17.652417115  | 1 | 0 | 0 | # | oh  |
| 1932 | 12 | 3 | -1.050000 | -2.078731651 | 22.268773030  | 15.603517583  | 1 | 0 | 0 | # | ob  |
| 1933 | 12 | 3 | -1.050000 | -0.981894487 | 19.499100680  | -17.631368622 | 1 | 0 | 1 | # | ob  |
| 1934 | 12 | 3 | -1.050000 | -5.023189092 | 24.133139700  | -15.431920289 | 1 | 0 | 1 | # | ob  |
| 1935 | 12 | 3 | -1.050000 | -1.607035345 | 23.950251481  | 17.631577932  | 1 | 0 | 0 | # | ob  |
| 1936 | 12 | 3 | -1.050000 | -2.741532736 | 19.668746126  | 15.433153738  | 1 | 0 | 0 | # | ob  |
| 1937 | 12 | 7 | 2.100000  | -0.953702986 | 19.345319204  | -16.002222830 | 1 | 0 | 1 | # | st  |
| 1938 | 12 | 7 | 2.100000  | -1.634672226 | 23.791570782  | 16.003201903  | 1 | 0 | 0 | # | st  |
| 1939 | 12 | 7 | 2.100000  | -4.222997014 | 25.200180796  | 16.002222830  | 1 | 0 | 0 | # | st  |
| 1940 | 12 | 7 | 2.100000  | -1.634647014 | 20.745630796  | 16.002222830  | 1 | 0 | 0 | # | st  |
| 1941 | 12 | 7 | 2.100000  | -0.953677774 | 25.208479218  | -16.003201903 | 1 | 0 | 1 | # | st  |
| 1942 | 12 | 7 | 2.100000  | -3.542027774 | 20.753929218  | -16.003201903 | 1 | 0 | 1 | # | st  |
| 1943 | 12 | 7 | 2.100000  | -3.542052986 | 23.799869204  | -16.002222830 | 1 | 0 | 1 | # | st  |
| 1944 | 12 | 7 | 2.100000  | -4.223022226 | 19.337020782  | 16.003201903  | 1 | 0 | 0 | # | st  |
| 1945 | 12 | 1 | 1.575000  | -2.588144971 | -27.434438432 | -18.664729368 | 1 | 1 | 1 | # | ao  |
| 1946 | 12 | 1 | 1.575000  | -5.176494971 | -22.979888432 | -18.664729368 | 1 | 1 | 1 | # | ao  |
| 1947 | 12 | 1 | 1.575000  | -2.588555029 | -21.474661568 | 18.664729368  | 1 | 1 | 0 | # | ao  |
| 1948 | 12 | 1 | 1.575000  | -0.000205029 | -25.929211568 | 18.664729368  | 1 | 1 | 0 | # | ao  |
| 1949 | 12 | 2 | 0.425000  | -1.442049128 | -24.451832678 | -17.178884937 | 1 | 1 | 1 | # | ho  |
| 1950 | 12 | 2 | 0.425000  | -4.030399128 | 26.730017322  | -17.178884937 | 1 | 0 | 1 | # | ho  |
| 1951 | 12 | 2 | 0.425000  | -3.734650872 | -24.457267322 | 17.178884937  | 1 | 1 | 0 | # | ho  |
| 1952 | 12 | 2 | 0.425000  | -1.146300872 | -20.002717322 | 17.178884937  | 1 | 1 | 0 | # | ho  |
| 1953 | 12 | 3 | -1.050000 | -4.195385345 | -27.231598519 | 17.631577932  | 1 | 1 | 0 | # | ob  |
| 1954 | 12 | 3 | -1.050000 | -0.153182736 | -22.604003874 | 15.433153738  | 1 | 1 | 0 | # | ob  |
| 1955 | 12 | 3 | -1.050000 | -1.606455513 | -26.135450680 | 17.631368622  | 1 | 1 | 0 | # | ob  |
| 1956 | 12 | 3 | -1.050000 | -2.741860908 | -21.860389700 | 15.431920289  | 1 | 1 | 0 | # | ob  |
| 1957 | 12 | 3 | -1.050000 | -4.194805513 | -21.680900680 | 17.631368622  | 1 | 1 | 0 | # | ob  |
| 1958 | 12 | 3 | -1.050000 | -3.570244487 | -22.773649320 | -17.631368622 | 1 | 1 | 1 | # | ob  |
| 1959 | 12 | 3 | -1.050000 | -0.153510908 | -26.314939700 | 15.431920289  | 1 | 1 | 0 | # | ob  |
| 1960 | 12 | 3 | -1.050000 | -3.569664655 | -26.132051481 | -17.631577932 | 1 | 1 | 1 | # | ob  |
| 1961 | 12 | 3 | -1.050000 | -2.435167264 | -21.850546126 | -15.433153738 | 1 | 1 | 1 | # | ob  |
| 1962 | 12 | 3 | -1.050000 | -0.981314655 | -21.677501481 | -17.631577932 | 1 | 1 | 1 | # | ob  |
| 1963 | 12 | 3 | -1.050000 | -5.023517264 | -26.305096126 | -15.433153738 | 1 | 1 | 1 | # | ob  |
| 1964 | 12 | 3 | -1.050000 | -2.434839092 | -27.048710300 | -15.431920289 | 1 | 1 | 1 | # | ob  |
| 1965 | 12 | 6 | -0.950000 | -3.177442343 | 26.728240996  | -17.652417115 | 1 | 0 | 1 | # | oh  |
| 1966 | 12 | 3 | -1.050000 | -0.509618349 | 26.731276970  | -15.603517583 | 1 | 0 | 1 | # | ob  |
| 1967 | 12 | 6 | -0.950000 | -0.589092343 | -24.453609004 | -17.652417115 | 1 | 1 | 1 | # | oh  |
| 1968 | 12 | 3 | -1.050000 | -3.097968349 | -24.450573030 | -15.603517583 | 1 | 1 | 1 | # | ob  |
| 1969 | 12 | 4 | -0.950000 | -1.999257657 | -20.000940996 | 17.652417115  | 1 | 1 | 0 | # | oho |
| 1970 | 12 | 5 | -0.950000 | -4.667081651 | -20.003976970 | 15.603517583  | 1 | 1 | 0 | # | oht |
| 1971 | 12 | 6 | -0.950000 | -4.587607657 | -24.455490996 | 17.652417115  | 1 | 1 | 0 | # | oh  |
| 1972 | 12 | 3 | -1.050000 | -2.078731651 | -24.458526970 | 15.603517583  | 1 | 1 | 0 | # | ob  |
| 1973 | 12 | 3 | -1.050000 | -0.981894487 | -27.228199320 | -17.631368622 | 1 | 1 | 1 | # | ob  |
| 1974 | 12 | 3 | -1.050000 | -5.023189092 | -22.594160300 | -15.431920289 | 1 | 1 | 1 | # | ob  |
| 1975 | 12 | 3 | -1.050000 | -1.607035345 | -22.777048519 | 17.631577932  | 1 | 1 | 0 | # | ob  |
| 1976 | 12 | 3 | -1.050000 | -2.741532736 | -27.058553874 | 15.433153738  | 1 | 1 | 0 | # | ob  |
| 1977 | 12 | 7 | 2.100000  | -0.953702986 | -27.381980796 | -16.002222830 | 1 | 1 | 1 | # | st  |
| 1978 | 12 | 7 | 2.100000  | -1.634672226 | -22.935729218 | 16.003201903  | 1 | 1 | 0 | # | st  |
| 1979 | 12 | 7 | 2.100000  | -4.222997014 | -21.527119204 | 16.002222830  | 1 | 1 | 0 | # | st  |
| 1980 | 12 | 7 | 2.100000  | -1.634647014 | -25.981669204 | 16.002222830  | 1 | 1 | 0 | # | st  |
| 1981 | 12 | 7 | 2.100000  | -0.953677774 | -21.518820782 | -16.003201903 | 1 | 1 | 1 | # | st  |
| 1982 | 12 | 7 | 2.100000  | -3.542027774 | -25.973370782 | -16.003201903 | 1 | 1 | 1 | # | st  |

|      |    |   |           |              |               |               |   |   |   |   |     |
|------|----|---|-----------|--------------|---------------|---------------|---|---|---|---|-----|
| 1983 | 12 | 7 | 2.100000  | -3.542052986 | -22.927430796 | -16.002222830 | 1 | 1 | 1 | # | st  |
| 1984 | 12 | 7 | 2.100000  | -4.223022226 | -27.390279218 | 16.003201903  | 1 | 1 | 0 | # | st  |
| 1985 | 12 | 5 | -0.950000 | -0.439233573 | -19.680858114 | -6.743779050  | 1 | 1 | 1 | # | oht |
| 1986 | 12 | 5 | -0.950000 | -4.871761797 | -0.272172439  | -12.134227113 | 1 | 0 | 1 | # | oht |
| 1987 | 12 | 2 | 0.425000  | -5.220127747 | -1.308055357  | -12.328360493 | 1 | 0 | 1 | # | ho  |
| 1988 | 12 | 2 | 0.425000  | -0.176711381 | -1.054326608  | -6.235429463  | 1 | 0 | 1 | # | ho  |
| 1989 | 12 | 2 | 0.425000  | -0.312851036 | -18.596754758 | -6.945886456  | 1 | 1 | 1 | # | ho  |
| 1990 | 12 | 2 | 0.425000  | -5.063651085 | -19.012312375 | -12.696363051 | 1 | 1 | 1 | # | ho  |
| 1991 | 13 | 1 | 1.575000  | 2.588555029  | 1.474661568   | -9.332229368  | 0 | 0 | 1 | # | ao  |
| 1992 | 13 | 1 | 1.575000  | 0.000205029  | 5.929211568   | -9.332229368  | 0 | 0 | 1 | # | ao  |
| 1993 | 13 | 1 | 1.575000  | 2.588144971  | 7.434438432   | -9.332770632  | 0 | 0 | 1 | # | ao  |
| 1994 | 13 | 1 | 1.575000  | 5.176494971  | 2.979888432   | -9.332770632  | 0 | 0 | 1 | # | ao  |
| 1995 | 13 | 2 | 0.425000  | 3.734650872  | 4.457267322   | -7.846384937  | 0 | 0 | 1 | # | ho  |
| 1996 | 13 | 2 | 0.425000  | 1.146300872  | 0.002717322   | -7.846384937  | 0 | 0 | 1 | # | ho  |
| 1997 | 13 | 2 | 0.425000  | 1.442049128  | 4.451832678   | -10.818615063 | 0 | 0 | 1 | # | ho  |
| 1998 | 13 | 2 | 0.425000  | 4.030399128  | 8.906382678   | -10.818615063 | 0 | 0 | 1 | # | ho  |
| 1999 | 13 | 3 | -1.050000 | 0.981314655  | 1.677501481   | -10.365922068 | 0 | 0 | 1 | # | ob  |
| 2000 | 13 | 3 | -1.050000 | 5.023517264  | 6.305096126   | -12.564346262 | 0 | 0 | 1 | # | ob  |
| 2001 | 13 | 3 | -1.050000 | 3.570244487  | 2.773649320   | -10.366131378 | 0 | 0 | 1 | # | ob  |
| 2002 | 13 | 3 | -1.050000 | 2.434839092  | 7.048710300   | -12.565579711 | 0 | 0 | 1 | # | ob  |
| 2003 | 13 | 3 | -1.050000 | 0.981894487  | 7.228199320   | -10.366131378 | 0 | 0 | 1 | # | ob  |
| 2004 | 13 | 3 | -1.050000 | 1.606455513  | 6.135450680   | -8.298868622  | 0 | 0 | 1 | # | ob  |
| 2005 | 13 | 3 | -1.050000 | 5.023189092  | 2.594160300   | -12.565579711 | 0 | 0 | 1 | # | ob  |
| 2006 | 13 | 3 | -1.050000 | 1.607035345  | 2.777048519   | -8.299077932  | 0 | 0 | 1 | # | ob  |
| 2007 | 13 | 3 | -1.050000 | 2.741532736  | 7.058553874   | -6.100653738  | 0 | 0 | 1 | # | ob  |
| 2008 | 13 | 3 | -1.050000 | 4.195385345  | 7.231598519   | -8.299077932  | 0 | 0 | 1 | # | ob  |
| 2009 | 13 | 3 | -1.050000 | 0.153182736  | 2.604003874   | -6.100653738  | 0 | 0 | 1 | # | ob  |
| 2010 | 13 | 3 | -1.050000 | 2.741860908  | 1.860389700   | -6.099420289  | 0 | 0 | 1 | # | ob  |
| 2011 | 13 | 4 | -0.950000 | 1.999257657  | 0.000940996   | -8.319917115  | 0 | 0 | 1 | # | oho |
| 2012 | 13 | 5 | -0.950000 | 4.667081651  | 0.003976970   | -6.271017583  | 0 | 0 | 1 | # | oht |
| 2013 | 13 | 6 | -0.950000 | 4.587607657  | 4.455490996   | -8.319917115  | 0 | 0 | 1 | # | oh  |
| 2014 | 13 | 3 | -1.050000 | 2.078731651  | 4.458526970   | -6.271017583  | 0 | 0 | 1 | # | ob  |
| 2015 | 13 | 6 | -0.950000 | 3.177442343  | 8.908159004   | -10.345082885 | 0 | 0 | 1 | # | oh  |
| 2016 | 13 | 3 | -1.050000 | 0.509618349  | 8.905123030   | -12.393982417 | 0 | 0 | 1 | # | ob  |
| 2017 | 13 | 6 | -0.950000 | 0.589092343  | 4.453609004   | -10.345082885 | 0 | 0 | 1 | # | oh  |
| 2018 | 13 | 3 | -1.050000 | 3.097968349  | 4.450573030   | -12.393982417 | 0 | 0 | 1 | # | ob  |
| 2019 | 13 | 3 | -1.050000 | 4.194805513  | 1.680900680   | -8.298868622  | 0 | 0 | 1 | # | ob  |
| 2020 | 13 | 3 | -1.050000 | 0.153510908  | 6.314939700   | -6.099420289  | 0 | 0 | 1 | # | ob  |
| 2021 | 13 | 3 | -1.050000 | 3.569664655  | 6.132051481   | -10.365922068 | 0 | 0 | 1 | # | ob  |
| 2022 | 13 | 3 | -1.050000 | 2.435167264  | 1.850546126   | -12.564346262 | 0 | 0 | 1 | # | ob  |
| 2023 | 13 | 7 | 2.100000  | 4.222997014  | 1.527119204   | -6.669722830  | 0 | 0 | 1 | # | st  |
| 2024 | 13 | 7 | 2.100000  | 3.542027774  | 5.973370782   | -11.994298097 | 0 | 0 | 1 | # | st  |
| 2025 | 13 | 7 | 2.100000  | 0.953702986  | 7.381980796   | -11.995277170 | 0 | 0 | 1 | # | st  |
| 2026 | 13 | 7 | 2.100000  | 3.542052986  | 2.927430796   | -11.995277170 | 0 | 0 | 1 | # | st  |
| 2027 | 13 | 7 | 2.100000  | 4.223022226  | 7.390279218   | -6.670701903  | 0 | 0 | 1 | # | st  |
| 2028 | 13 | 7 | 2.100000  | 1.634672226  | 2.935729218   | -6.670701903  | 0 | 0 | 1 | # | st  |
| 2029 | 13 | 7 | 2.100000  | 1.634647014  | 5.981669204   | -6.669722830  | 0 | 0 | 1 | # | st  |
| 2030 | 13 | 7 | 2.100000  | 0.953677774  | 1.518820782   | -11.994298097 | 0 | 0 | 1 | # | st  |
| 2031 | 13 | 1 | 1.575000  | 2.588555029  | 10.383761568  | -9.332229368  | 0 | 0 | 1 | # | ao  |
| 2032 | 13 | 1 | 1.575000  | 0.000205029  | 14.838311568  | -9.332229368  | 0 | 0 | 1 | # | ao  |
| 2033 | 13 | 1 | 1.575000  | 2.588144971  | 16.343538432  | -9.332770632  | 0 | 0 | 1 | # | ao  |
| 2034 | 13 | 1 | 1.575000  | 5.176494971  | 11.888988432  | -9.332770632  | 0 | 0 | 1 | # | ao  |
| 2035 | 13 | 2 | 0.425000  | 3.734650872  | 13.366367322  | -7.846384937  | 0 | 0 | 1 | # | ho  |
| 2036 | 13 | 2 | 0.425000  | 1.146300872  | 8.911817322   | -7.846384937  | 0 | 0 | 1 | # | ho  |
| 2037 | 13 | 2 | 0.425000  | 1.442049128  | 13.360932678  | -10.818615063 | 0 | 0 | 1 | # | ho  |
| 2038 | 13 | 2 | 0.425000  | 4.030399128  | 17.815482678  | -10.818615063 | 0 | 0 | 1 | # | ho  |
| 2039 | 13 | 3 | -1.050000 | 0.981314655  | 10.586601481  | -10.365922068 | 0 | 0 | 1 | # | ob  |
| 2040 | 13 | 3 | -1.050000 | 5.023517264  | 15.214196126  | -12.564346262 | 0 | 0 | 1 | # | ob  |
| 2041 | 13 | 3 | -1.050000 | 3.570244487  | 11.682749320  | -10.366131378 | 0 | 0 | 1 | # | ob  |
| 2042 | 13 | 3 | -1.050000 | 2.434839092  | 15.957810300  | -12.565579711 | 0 | 0 | 1 | # | ob  |
| 2043 | 13 | 3 | -1.050000 | 0.981894487  | 16.137299320  | -10.366131378 | 0 | 0 | 1 | # | ob  |
| 2044 | 13 | 3 | -1.050000 | 1.606455513  | 15.044550680  | -8.298868622  | 0 | 0 | 1 | # | ob  |
| 2045 | 13 | 3 | -1.050000 | 5.023189092  | 11.503260300  | -12.565579711 | 0 | 0 | 1 | # | ob  |
| 2046 | 13 | 3 | -1.050000 | 1.607035345  | 11.686148519  | -8.299077932  | 0 | 0 | 1 | # | ob  |
| 2047 | 13 | 3 | -1.050000 | 2.741532736  | 15.967653874  | -6.100653738  | 0 | 0 | 1 | # | ob  |
| 2048 | 13 | 3 | -1.050000 | 4.195385345  | 16.140698519  | -8.299077932  | 0 | 0 | 1 | # | ob  |
| 2049 | 13 | 3 | -1.050000 | 0.153182736  | 11.513103874  | -6.100653738  | 0 | 0 | 1 | # | ob  |
| 2050 | 13 | 3 | -1.050000 | 2.741860908  | 10.769489700  | -6.099420289  | 0 | 0 | 1 | # | ob  |
| 2051 | 13 | 6 | -0.950000 | 1.999257657  | 8.910040996   | -8.319917115  | 0 | 0 | 1 | # | oho |
| 2052 | 13 | 3 | -1.050000 | 4.667081651  | 8.913076970   | -6.271017583  | 0 | 0 | 1 | # | ob  |
| 2053 | 13 | 6 | -0.950000 | 4.587607657  | 13.364590996  | -8.319917115  | 0 | 0 | 1 | # | oh  |
| 2054 | 13 | 3 | -1.050000 | 2.078731651  | 13.367626970  | -6.271017583  | 0 | 0 | 1 | # | ob  |
| 2055 | 13 | 6 | -0.950000 | 3.177442343  | 17.817259004  | -10.345082885 | 0 | 0 | 1 | # | oh  |
| 2056 | 13 | 3 | -1.050000 | 0.509618349  | 17.814223030  | -12.393982417 | 0 | 0 | 1 | # | ob  |
| 2057 | 13 | 6 | -0.950000 | 0.589092343  | 13.362709004  | -10.345082885 | 0 | 0 | 1 | # | oh  |
| 2058 | 13 | 3 | -1.050000 | 3.097968349  | 13.359673030  | -12.393982417 | 0 | 0 | 1 | # | ob  |
| 2059 | 13 | 3 | -1.050000 | 4.194805513  | 10.590000680  | -8.298868622  | 0 | 0 | 1 | # | ob  |
| 2060 | 13 | 3 | -1.050000 | 0.153510908  | 15.224039700  | -6.099420289  | 0 | 0 | 1 | # | ob  |
| 2061 | 13 | 3 | -1.050000 | 3.569664655  | 15.041151481  | -10.365922068 | 0 | 0 | 1 | # | ob  |
| 2062 | 13 | 3 | -1.050000 | 2.435167264  | 10.759646126  | -12.564346262 | 0 | 0 | 1 | # | ob  |
| 2063 | 13 | 7 | 2.100000  | 4.222997014  | 10.436219204  | -6.669722830  | 0 | 0 | 1 | # | st  |
| 2064 | 13 | 7 | 2.100000  | 3.542027774  | 14.882470782  | -11.994298097 | 0 | 0 | 1 | # | st  |
| 2065 | 13 | 7 | 2.100000  | 0.953702986  | 16.291080796  | -11.995277170 | 0 | 0 | 1 | # | st  |
| 2066 | 13 | 7 | 2.100000  | 3.542052986  | 11.836530796  | -11.995277170 | 0 | 0 | 1 | # | st  |
| 2067 | 13 | 7 | 2.100000  | 4.223022226  | 16.299379218  | -6.670701903  | 0 | 0 | 1 | # | st  |
| 2068 | 13 | 7 | 2.100000  | 1.634672226  | 11.844829218  | -6.670701903  | 0 | 0 | 1 | # | st  |
| 2069 | 13 | 7 | 2.100000  | 1.634647014  | 14.890769204  | -6.669722830  | 0 | 0 | 1 | # | st  |
| 2070 | 13 | 7 | 2.100000  | 0.953677774  | 10.427920782  | -11.994298097 | 0 | 0 | 1 | # | st  |
| 2071 | 13 | 1 | 1.575000  | 2.588555029  | 19.292861568  | -9.332229368  | 0 | 0 | 1 | # | ao  |
| 2072 | 13 | 1 | 1.575000  | 0.000205029  | 23.747411568  | -9.332229368  | 0 | 0 | 1 | # | ao  |
| 2073 | 13 | 1 | 1.575000  | 2.588144971  | 25.252638432  | -9.332770632  | 0 | 0 | 1 | # | ao  |
| 2074 | 13 | 1 | 1.575000  | 5.176494971  | 20.798088432  | -9.332770632  | 0 | 0 | 1 | # | ao  |
| 2075 | 13 | 2 | 0.425000  | 3.734650872  | 22.275467322  | -7.846384937  | 0 | 0 | 1 | # | ho  |

|      |    |   |           |              |               |               |   |   |   |   |     |
|------|----|---|-----------|--------------|---------------|---------------|---|---|---|---|-----|
| 2076 | 13 | 2 | 0.425000  | 1.146300872  | 17.820917322  | -7.846384937  | 0 | 0 | 1 | # | ho  |
| 2077 | 13 | 2 | 0.425000  | 1.442049128  | 22.270032678  | -10.818615063 | 0 | 0 | 1 | # | ho  |
| 2078 | 13 | 2 | 0.425000  | 4.030399128  | 26.724582678  | -10.818615063 | 0 | 0 | 1 | # | ho  |
| 2079 | 13 | 3 | -1.050000 | 0.981314655  | 19.495701481  | -10.365922068 | 0 | 0 | 1 | # | ob  |
| 2080 | 13 | 3 | -1.050000 | 5.023517264  | 24.123296126  | -12.564346262 | 0 | 0 | 1 | # | ob  |
| 2081 | 13 | 3 | -1.050000 | 3.570244487  | 20.591849320  | -10.366131378 | 0 | 0 | 1 | # | ob  |
| 2082 | 13 | 3 | -1.050000 | 2.434839092  | 24.866910300  | -12.565579711 | 0 | 0 | 1 | # | ob  |
| 2083 | 13 | 3 | -1.050000 | 0.981894487  | 25.046399320  | -10.366131378 | 0 | 0 | 1 | # | ob  |
| 2084 | 13 | 3 | -1.050000 | 1.606455513  | 23.953650680  | -8.298868622  | 0 | 0 | 1 | # | ob  |
| 2085 | 13 | 3 | -1.050000 | 5.023189092  | 20.412360300  | -12.565579711 | 0 | 0 | 1 | # | ob  |
| 2086 | 13 | 3 | -1.050000 | 1.607035345  | 20.595248519  | -8.299077932  | 0 | 0 | 1 | # | ob  |
| 2087 | 13 | 3 | -1.050000 | 2.741532736  | 24.876753874  | -6.100653738  | 0 | 0 | 1 | # | ob  |
| 2088 | 13 | 3 | -1.050000 | 4.195385345  | 25.049798519  | -8.299077932  | 0 | 0 | 1 | # | ob  |
| 2089 | 13 | 3 | -1.050000 | 0.153182736  | 20.422203874  | -6.100653738  | 0 | 0 | 1 | # | ob  |
| 2090 | 13 | 3 | -1.050000 | 2.741860908  | 19.678589700  | -6.099420289  | 0 | 0 | 1 | # | ob  |
| 2091 | 13 | 6 | -0.950000 | 1.999257657  | 17.819140996  | -8.319917115  | 0 | 0 | 1 | # | oh  |
| 2092 | 13 | 3 | -1.050000 | 4.667081651  | 17.822176970  | -6.271017583  | 0 | 0 | 1 | # | ob  |
| 2093 | 13 | 6 | -0.950000 | 4.587607657  | 22.273690996  | -8.319917115  | 0 | 0 | 1 | # | oh  |
| 2094 | 13 | 3 | -1.050000 | 2.078731651  | 22.276726970  | -6.271017583  | 0 | 0 | 1 | # | ob  |
| 2095 | 13 | 6 | -0.950000 | 3.177442343  | 26.726359004  | -10.345082885 | 0 | 0 | 1 | # | oh  |
| 2096 | 13 | 3 | -1.050000 | 0.509618349  | 26.723323030  | -12.393982417 | 0 | 0 | 1 | # | ob  |
| 2097 | 13 | 6 | -0.950000 | 0.589092343  | 22.271809004  | -10.345082885 | 0 | 0 | 1 | # | oh  |
| 2098 | 13 | 3 | -1.050000 | 3.097968349  | 22.268773030  | -12.393982417 | 0 | 0 | 1 | # | ob  |
| 2099 | 13 | 3 | -1.050000 | 4.194805513  | 19.499100680  | -8.298868622  | 0 | 0 | 1 | # | ob  |
| 2100 | 13 | 3 | -1.050000 | 0.153510908  | 24.133139700  | -6.099420289  | 0 | 0 | 1 | # | ob  |
| 2101 | 13 | 3 | -1.050000 | 3.569664655  | 23.950251481  | -10.365922068 | 0 | 0 | 1 | # | ob  |
| 2102 | 13 | 3 | -1.050000 | 2.435167264  | 19.668746126  | -12.564346262 | 0 | 0 | 1 | # | ob  |
| 2103 | 13 | 7 | 2.100000  | 4.222997014  | 19.345319204  | -6.669722830  | 0 | 0 | 1 | # | st  |
| 2104 | 13 | 7 | 2.100000  | 3.542027774  | 23.791570782  | -11.994298097 | 0 | 0 | 1 | # | st  |
| 2105 | 13 | 7 | 2.100000  | 0.953702986  | 25.200180796  | -11.995277170 | 0 | 0 | 1 | # | st  |
| 2106 | 13 | 7 | 2.100000  | 3.542052986  | 20.745630796  | -11.995277170 | 0 | 0 | 1 | # | st  |
| 2107 | 13 | 7 | 2.100000  | 4.223022226  | 25.208479218  | -6.670701903  | 0 | 0 | 1 | # | st  |
| 2108 | 13 | 7 | 2.100000  | 1.634672226  | 20.753929218  | -6.670701903  | 0 | 0 | 1 | # | st  |
| 2109 | 13 | 7 | 2.100000  | 1.634647014  | 23.799869204  | -6.669722830  | 0 | 0 | 1 | # | st  |
| 2110 | 13 | 7 | 2.100000  | 0.953677774  | 19.337020782  | -11.994298097 | 0 | 0 | 1 | # | st  |
| 2111 | 13 | 1 | 1.575000  | 2.588555029  | -27.434438432 | -9.332229368  | 0 | 1 | 1 | # | ao  |
| 2112 | 13 | 1 | 1.575000  | 0.000205029  | -22.979888432 | -9.332229368  | 0 | 1 | 1 | # | ao  |
| 2113 | 13 | 1 | 1.575000  | 2.588144971  | -21.474661568 | -9.332770632  | 0 | 1 | 1 | # | ao  |
| 2114 | 13 | 1 | 1.575000  | 5.176494971  | -25.929211568 | -9.332770632  | 0 | 1 | 1 | # | ao  |
| 2115 | 13 | 2 | 0.425000  | 3.734650872  | -24.451832678 | -7.846384937  | 0 | 1 | 1 | # | ho  |
| 2116 | 13 | 2 | 0.425000  | 1.146300872  | 26.730017322  | -7.846384937  | 0 | 0 | 1 | # | ho  |
| 2117 | 13 | 2 | 0.425000  | 1.442049128  | -24.457267322 | -10.818615063 | 0 | 1 | 1 | # | ho  |
| 2118 | 13 | 2 | 0.425000  | 4.030399128  | -20.002717322 | -10.818615063 | 0 | 1 | 1 | # | ho  |
| 2119 | 13 | 3 | -1.050000 | 0.981314655  | -27.231598519 | -10.365922068 | 0 | 1 | 1 | # | ob  |
| 2120 | 13 | 3 | -1.050000 | 5.023517264  | -22.604003874 | -12.564346262 | 0 | 1 | 1 | # | ob  |
| 2121 | 13 | 3 | -1.050000 | 3.570244487  | -26.135450680 | -10.366131378 | 0 | 1 | 1 | # | ob  |
| 2122 | 13 | 3 | -1.050000 | 2.434839092  | -21.860389700 | -12.565579711 | 0 | 1 | 1 | # | ob  |
| 2123 | 13 | 3 | -1.050000 | 0.981894487  | -21.680900680 | -10.366131378 | 0 | 1 | 1 | # | ob  |
| 2124 | 13 | 3 | -1.050000 | 1.606455513  | -22.773649320 | -8.298868622  | 0 | 1 | 1 | # | ob  |
| 2125 | 13 | 3 | -1.050000 | 5.023189092  | -26.314939700 | -12.565579711 | 0 | 1 | 1 | # | ob  |
| 2126 | 13 | 3 | -1.050000 | 1.607035345  | -26.132051481 | -8.299077932  | 0 | 1 | 1 | # | ob  |
| 2127 | 13 | 3 | -1.050000 | 2.741532736  | -21.850546126 | -6.100653738  | 0 | 1 | 1 | # | ob  |
| 2128 | 13 | 3 | -1.050000 | 4.195385345  | -21.677501481 | -8.299077932  | 0 | 1 | 1 | # | ob  |
| 2129 | 13 | 3 | -1.050000 | 0.153182736  | -26.305096126 | -6.100653738  | 0 | 1 | 1 | # | ob  |
| 2130 | 13 | 3 | -1.050000 | 2.741860908  | -27.048710300 | -6.099420289  | 0 | 1 | 1 | # | ob  |
| 2131 | 13 | 6 | -0.950000 | 1.999257657  | 26.728240996  | -8.319917115  | 0 | 0 | 1 | # | oh  |
| 2132 | 13 | 3 | -1.050000 | 4.667081651  | 26.731276970  | -6.271017583  | 0 | 0 | 1 | # | ob  |
| 2133 | 13 | 6 | -0.950000 | 4.587607657  | -24.453609004 | -8.319917115  | 0 | 1 | 1 | # | oh  |
| 2134 | 13 | 3 | -1.050000 | 2.078731651  | -24.450573030 | -6.271017583  | 0 | 1 | 1 | # | ob  |
| 2135 | 13 | 4 | -0.950000 | 3.177442343  | -20.000940996 | -10.345082885 | 0 | 1 | 1 | # | oh  |
| 2136 | 13 | 5 | -0.950000 | 0.509618349  | -20.003976970 | -12.393982417 | 0 | 1 | 1 | # | oht |
| 2137 | 13 | 6 | -0.950000 | 0.589092343  | -24.455490996 | -10.345082885 | 0 | 1 | 1 | # | oh  |
| 2138 | 13 | 3 | -1.050000 | 3.097968349  | -24.458526970 | -12.393982417 | 0 | 1 | 1 | # | ob  |
| 2139 | 13 | 3 | -1.050000 | 4.194805513  | -27.228199320 | -8.298868622  | 0 | 1 | 1 | # | ob  |
| 2140 | 13 | 3 | -1.050000 | 0.153510908  | -22.594160300 | -6.099420289  | 0 | 1 | 1 | # | ob  |
| 2141 | 13 | 3 | -1.050000 | 3.569664655  | -22.777048519 | -10.365922068 | 0 | 1 | 1 | # | ob  |
| 2142 | 13 | 3 | -1.050000 | 2.435167264  | -27.058553874 | -12.564346262 | 0 | 1 | 1 | # | ob  |
| 2143 | 13 | 7 | 2.100000  | 4.222997014  | -27.381980796 | -6.669722830  | 0 | 1 | 1 | # | st  |
| 2144 | 13 | 7 | 2.100000  | 3.542027774  | -22.935729218 | -11.994298097 | 0 | 1 | 1 | # | st  |
| 2145 | 13 | 7 | 2.100000  | 0.953702986  | -21.527119204 | -11.995277170 | 0 | 1 | 1 | # | st  |
| 2146 | 13 | 7 | 2.100000  | 3.542052986  | -25.981669204 | -11.995277170 | 0 | 1 | 1 | # | st  |
| 2147 | 13 | 7 | 2.100000  | 4.223022226  | -21.518820782 | -6.670701903  | 0 | 1 | 1 | # | st  |
| 2148 | 13 | 7 | 2.100000  | 1.634672226  | -25.973370782 | -6.670701903  | 0 | 1 | 1 | # | st  |
| 2149 | 13 | 7 | 2.100000  | 1.634647014  | -22.927430796 | -6.669722830  | 0 | 1 | 1 | # | st  |
| 2150 | 13 | 7 | 2.100000  | 0.953677774  | -27.390279218 | -11.994298097 | 0 | 1 | 1 | # | st  |
| 2151 | 13 | 5 | -0.950000 | 4.737466427  | -19.680858114 | 2.588720950   | 0 | 1 | 1 | # | oht |
| 2152 | 13 | 5 | -0.950000 | 0.304938203  | -0.272172439  | -2.801727113  | 0 | 0 | 1 | # | oht |
| 2153 | 13 | 2 | 0.425000  | 4.999988619  | -1.054326608  | 3.097070537   | 0 | 0 | 1 | # | ho  |
| 2154 | 13 | 2 | 0.425000  | 4.863848964  | -18.596754758 | 2.386613544   | 0 | 1 | 1 | # | ho  |
| 2155 | 13 | 2 | 0.425000  | 0.113048915  | -19.012312375 | -3.363863051  | 0 | 1 | 1 | # | ho  |
| 2156 | 14 | 1 | 1.575000  | 7.765255029  | 1.474661568   | -9.332229368  | 0 | 0 | 1 | # | ao  |
| 2157 | 14 | 1 | 1.575000  | 5.176905029  | 5.929211568   | -9.332229368  | 0 | 0 | 1 | # | ao  |
| 2158 | 14 | 1 | 1.575000  | 7.764844971  | 7.434438432   | -9.332770632  | 0 | 0 | 1 | # | ao  |
| 2159 | 14 | 1 | 1.575000  | 10.353194971 | 2.979888432   | -9.332770632  | 0 | 0 | 1 | # | ao  |
| 2160 | 14 | 2 | 0.425000  | 8.911350872  | 4.457267322   | -7.846384937  | 0 | 0 | 1 | # | ho  |
| 2161 | 14 | 2 | 0.425000  | 6.323000872  | 0.002717322   | -7.846384937  | 0 | 0 | 1 | # | ho  |
| 2162 | 14 | 2 | 0.425000  | 6.618749128  | 4.451832678   | -10.818615063 | 0 | 0 | 1 | # | ho  |
| 2163 | 14 | 2 | 0.425000  | 9.207099128  | 8.906382678   | -10.818615063 | 0 | 0 | 1 | # | ho  |
| 2164 | 14 | 3 | -1.050000 | 6.158014655  | 1.677501481   | -10.365922068 | 0 | 0 | 1 | # | ob  |
| 2165 | 14 | 3 | -1.050000 | 10.200217264 | 6.305096126   | -12.564346262 | 0 | 0 | 1 | # | ob  |
| 2166 | 14 | 3 | -1.050000 | 8.746944487  | 2.773649320   | -10.366131378 | 0 | 0 | 1 | # | ob  |
| 2167 | 14 | 3 | -1.050000 | 7.611539092  | 7.048710300   | -12.565579711 | 0 | 0 | 1 | # | ob  |
| 2168 | 14 | 3 | -1.050000 | 6.158594487  | 7.228199320   | -10.366131378 | 0 | 0 | 1 | # | ob  |

|      |    |   |           |              |              |               |   |   |   |   |    |
|------|----|---|-----------|--------------|--------------|---------------|---|---|---|---|----|
| 2169 | 14 | 3 | -1.050000 | 6.783155513  | 6.135450680  | -8.298868622  | 0 | 0 | 1 | # | ob |
| 2170 | 14 | 3 | -1.050000 | 10.199889092 | 2.594160300  | -12.565579711 | 0 | 0 | 1 | # | ob |
| 2171 | 14 | 3 | -1.050000 | 6.783735345  | 2.777048519  | -8.299077932  | 0 | 0 | 1 | # | ob |
| 2172 | 14 | 3 | -1.050000 | 7.918232736  | 7.058553874  | -6.100653738  | 0 | 0 | 1 | # | ob |
| 2173 | 14 | 3 | -1.050000 | 9.372085345  | 7.231598519  | -8.299077932  | 0 | 0 | 1 | # | ob |
| 2174 | 14 | 3 | -1.050000 | 5.329882736  | 2.604003874  | -6.100653738  | 0 | 0 | 1 | # | ob |
| 2175 | 14 | 3 | -1.050000 | 7.918560908  | 1.860389700  | -6.099420289  | 0 | 0 | 1 | # | ob |
| 2176 | 14 | 4 | -0.950000 | 7.175957657  | 0.000940996  | -8.319917115  | 0 | 0 | 1 | # | oh |
| 2177 | 14 | 5 | -0.950000 | 9.843781651  | 0.003976970  | -6.271017583  | 0 | 0 | 1 | # | oh |
| 2178 | 14 | 6 | -0.950000 | 9.764307657  | 4.455490996  | -8.319917115  | 0 | 0 | 1 | # | oh |
| 2179 | 14 | 3 | -1.050000 | 7.255431651  | 4.458526970  | -6.271017583  | 0 | 0 | 1 | # | ob |
| 2180 | 14 | 6 | -0.950000 | 8.354142343  | 8.908159004  | -10.345082885 | 0 | 0 | 1 | # | oh |
| 2181 | 14 | 3 | -1.050000 | 5.686318349  | 8.905123030  | -12.393982417 | 0 | 0 | 1 | # | ob |
| 2182 | 14 | 6 | -0.950000 | 5.765792343  | 4.453609004  | -10.345082885 | 0 | 0 | 1 | # | oh |
| 2183 | 14 | 3 | -1.050000 | 8.274668349  | 4.450573030  | -12.393982417 | 0 | 0 | 1 | # | ob |
| 2184 | 14 | 3 | -1.050000 | 9.371505513  | 1.680900680  | -8.298868622  | 0 | 0 | 1 | # | ob |
| 2185 | 14 | 3 | -1.050000 | 5.330210908  | 6.314939700  | -6.099420289  | 0 | 0 | 1 | # | ob |
| 2186 | 14 | 3 | -1.050000 | 8.746364655  | 6.132051481  | -10.365922068 | 0 | 0 | 1 | # | ob |
| 2187 | 14 | 3 | -1.050000 | 7.611867264  | 1.850546126  | -12.564346262 | 0 | 0 | 1 | # | ob |
| 2188 | 14 | 7 | 2.100000  | 9.399697014  | 1.527119204  | -6.669722830  | 0 | 0 | 1 | # | st |
| 2189 | 14 | 7 | 2.100000  | 8.718727774  | 5.973370782  | -11.994298097 | 0 | 0 | 1 | # | st |
| 2190 | 14 | 7 | 2.100000  | 6.130402986  | 7.381980796  | -11.995277170 | 0 | 0 | 1 | # | st |
| 2191 | 14 | 7 | 2.100000  | 8.718752986  | 2.927430796  | -11.995277170 | 0 | 0 | 1 | # | st |
| 2192 | 14 | 7 | 2.100000  | 9.399722226  | 7.390279218  | -6.670701903  | 0 | 0 | 1 | # | st |
| 2193 | 14 | 7 | 2.100000  | 6.811372226  | 2.935729218  | -6.670701903  | 0 | 0 | 1 | # | st |
| 2194 | 14 | 7 | 2.100000  | 6.811347014  | 5.981669204  | -6.669722830  | 0 | 0 | 1 | # | st |
| 2195 | 14 | 7 | 2.100000  | 6.130377774  | 1.518820782  | -11.994298097 | 0 | 0 | 1 | # | st |
| 2196 | 14 | 1 | 1.575000  | 7.765255029  | 10.383761568 | -9.332229368  | 0 | 0 | 1 | # | ao |
| 2197 | 14 | 1 | 1.575000  | 5.176905029  | 14.838311568 | -9.332229368  | 0 | 0 | 1 | # | ao |
| 2198 | 14 | 1 | 1.575000  | 7.764844971  | 16.343538432 | -9.332770632  | 0 | 0 | 1 | # | ao |
| 2199 | 14 | 1 | 1.575000  | 10.353194971 | 11.888988432 | -9.332770632  | 0 | 0 | 1 | # | ao |
| 2200 | 14 | 2 | 0.425000  | 8.911350872  | 13.366367322 | -7.846384937  | 0 | 0 | 1 | # | ho |
| 2201 | 14 | 2 | 0.425000  | 6.323000872  | 8.911817322  | -7.846384937  | 0 | 0 | 1 | # | ho |
| 2202 | 14 | 2 | 0.425000  | 6.618749128  | 13.360932678 | -10.818615063 | 0 | 0 | 1 | # | ho |
| 2203 | 14 | 2 | 0.425000  | 9.207099128  | 17.815482678 | -10.818615063 | 0 | 0 | 1 | # | ho |
| 2204 | 14 | 3 | -1.050000 | 6.158014655  | 10.586601481 | -10.365922068 | 0 | 0 | 1 | # | ob |
| 2205 | 14 | 3 | -1.050000 | 10.200217264 | 15.214196126 | -12.564346262 | 0 | 0 | 1 | # | ob |
| 2206 | 14 | 3 | -1.050000 | 8.746944487  | 11.682749320 | -10.366131378 | 0 | 0 | 1 | # | ob |
| 2207 | 14 | 3 | -1.050000 | 7.611539092  | 15.957810300 | -12.565579711 | 0 | 0 | 1 | # | ob |
| 2208 | 14 | 3 | -1.050000 | 6.158594487  | 16.137299320 | -10.366131378 | 0 | 0 | 1 | # | ob |
| 2209 | 14 | 3 | -1.050000 | 6.783155513  | 15.044550680 | -8.298868622  | 0 | 0 | 1 | # | ob |
| 2210 | 14 | 3 | -1.050000 | 10.199889092 | 11.503260300 | -12.565579711 | 0 | 0 | 1 | # | ob |
| 2211 | 14 | 3 | -1.050000 | 6.783735345  | 11.686148519 | -8.299077932  | 0 | 0 | 1 | # | ob |
| 2212 | 14 | 3 | -1.050000 | 7.918232736  | 15.967653874 | -6.100653738  | 0 | 0 | 1 | # | ob |
| 2213 | 14 | 3 | -1.050000 | 9.372085345  | 16.140698519 | -8.299077932  | 0 | 0 | 1 | # | ob |
| 2214 | 14 | 3 | -1.050000 | 5.329882736  | 11.513103874 | -6.100653738  | 0 | 0 | 1 | # | ob |
| 2215 | 14 | 3 | -1.050000 | 7.918560908  | 10.769489700 | -6.099420289  | 0 | 0 | 1 | # | ob |
| 2216 | 14 | 6 | -0.950000 | 7.175957657  | 8.910040996  | -8.319917115  | 0 | 0 | 1 | # | oh |
| 2217 | 14 | 3 | -1.050000 | 9.843781651  | 8.913076970  | -6.271017583  | 0 | 0 | 1 | # | ob |
| 2218 | 14 | 6 | -0.950000 | 9.764307657  | 13.364590996 | -8.319917115  | 0 | 0 | 1 | # | oh |
| 2219 | 14 | 3 | -1.050000 | 7.255431651  | 13.367626970 | -6.271017583  | 0 | 0 | 1 | # | ob |
| 2220 | 14 | 6 | -0.950000 | 8.354142343  | 17.817259004 | -10.345082885 | 0 | 0 | 1 | # | oh |
| 2221 | 14 | 3 | -1.050000 | 5.686318349  | 17.814223030 | -12.393982417 | 0 | 0 | 1 | # | ob |
| 2222 | 14 | 6 | -0.950000 | 5.765792343  | 13.362709004 | -10.345082885 | 0 | 0 | 1 | # | oh |
| 2223 | 14 | 3 | -1.050000 | 8.274668349  | 13.359673030 | -12.393982417 | 0 | 0 | 1 | # | ob |
| 2224 | 14 | 3 | -1.050000 | 9.371505513  | 10.590000680 | -8.298868622  | 0 | 0 | 1 | # | ob |
| 2225 | 14 | 3 | -1.050000 | 5.330210908  | 15.224039700 | -6.099420289  | 0 | 0 | 1 | # | ob |
| 2226 | 14 | 3 | -1.050000 | 8.746364655  | 15.041151481 | -10.365922068 | 0 | 0 | 1 | # | ob |
| 2227 | 14 | 3 | -1.050000 | 7.611867264  | 10.759646126 | -12.564346262 | 0 | 0 | 1 | # | ob |
| 2228 | 14 | 7 | 2.100000  | 9.399697014  | 10.436219204 | -6.669722830  | 0 | 0 | 1 | # | st |
| 2229 | 14 | 7 | 2.100000  | 8.718727774  | 14.882470782 | -11.994298097 | 0 | 0 | 1 | # | st |
| 2230 | 14 | 7 | 2.100000  | 6.130402986  | 16.291080796 | -11.995277170 | 0 | 0 | 1 | # | st |
| 2231 | 14 | 7 | 2.100000  | 8.718752986  | 11.836530796 | -11.995277170 | 0 | 0 | 1 | # | st |
| 2232 | 14 | 7 | 2.100000  | 9.399722226  | 16.299379218 | -6.670701903  | 0 | 0 | 1 | # | st |
| 2233 | 14 | 7 | 2.100000  | 6.811372226  | 11.844829218 | -6.670701903  | 0 | 0 | 1 | # | st |
| 2234 | 14 | 7 | 2.100000  | 6.811347014  | 14.890769204 | -6.669722830  | 0 | 0 | 1 | # | st |
| 2235 | 14 | 7 | 2.100000  | 6.130377774  | 10.427920782 | -11.994298097 | 0 | 0 | 1 | # | st |
| 2236 | 14 | 1 | 1.575000  | 7.765255029  | 19.292861568 | -9.332229368  | 0 | 0 | 1 | # | ao |
| 2237 | 14 | 1 | 1.575000  | 5.176905029  | 23.747411568 | -9.332229368  | 0 | 0 | 1 | # | ao |
| 2238 | 14 | 1 | 1.575000  | 7.764844971  | 25.252638432 | -9.332770632  | 0 | 0 | 1 | # | ao |
| 2239 | 14 | 1 | 1.575000  | 10.353194971 | 20.798088432 | -9.332770632  | 0 | 0 | 1 | # | ao |
| 2240 | 14 | 2 | 0.425000  | 8.911350872  | 22.275467322 | -7.846384937  | 0 | 0 | 1 | # | ho |
| 2241 | 14 | 2 | 0.425000  | 6.323000872  | 17.820917322 | -7.846384937  | 0 | 0 | 1 | # | ho |
| 2242 | 14 | 2 | 0.425000  | 6.618749128  | 22.270032678 | -10.818615063 | 0 | 0 | 1 | # | ho |
| 2243 | 14 | 2 | 0.425000  | 9.207099128  | 26.724582678 | -10.818615063 | 0 | 0 | 1 | # | ho |
| 2244 | 14 | 3 | -1.050000 | 6.158014655  | 19.495701481 | -10.365922068 | 0 | 0 | 1 | # | ob |
| 2245 | 14 | 3 | -1.050000 | 10.200217264 | 24.123296126 | -12.564346262 | 0 | 0 | 1 | # | ob |
| 2246 | 14 | 3 | -1.050000 | 8.746944487  | 20.591849320 | -10.366131378 | 0 | 0 | 1 | # | ob |
| 2247 | 14 | 3 | -1.050000 | 7.611539092  | 24.866910300 | -12.565579711 | 0 | 0 | 1 | # | ob |
| 2248 | 14 | 3 | -1.050000 | 6.158594487  | 25.046399320 | -10.366131378 | 0 | 0 | 1 | # | ob |
| 2249 | 14 | 3 | -1.050000 | 6.783155513  | 23.953650680 | -8.298868622  | 0 | 0 | 1 | # | ob |
| 2250 | 14 | 3 | -1.050000 | 10.199889092 | 20.412360300 | -12.565579711 | 0 | 0 | 1 | # | ob |
| 2251 | 14 | 3 | -1.050000 | 6.783735345  | 20.595248519 | -8.299077932  | 0 | 0 | 1 | # | ob |
| 2252 | 14 | 3 | -1.050000 | 7.918232736  | 24.876753874 | -6.100653738  | 0 | 0 | 1 | # | ob |
| 2253 | 14 | 3 | -1.050000 | 9.372085345  | 25.049798519 | -8.299077932  | 0 | 0 | 1 | # | ob |
| 2254 | 14 | 3 | -1.050000 | 5.329882736  | 20.422203874 | -6.100653738  | 0 | 0 | 1 | # | ob |
| 2255 | 14 | 3 | -1.050000 | 7.918560908  | 19.678589700 | -6.099420289  | 0 | 0 | 1 | # | ob |
| 2256 | 14 | 6 | -0.950000 | 7.175957657  | 17.819140996 | -8.319917115  | 0 | 0 | 1 | # | oh |
| 2257 | 14 | 3 | -1.050000 | 9.843781651  | 17.822176970 | -6.271017583  | 0 | 0 | 1 | # | ob |
| 2258 | 14 | 6 | -0.950000 | 9.764307657  | 22.273690996 | -8.319917115  | 0 | 0 | 1 | # | oh |
| 2259 | 14 | 3 | -1.050000 | 7.255431651  | 22.276726970 | -6.271017583  | 0 | 0 | 1 | # | ob |
| 2260 | 14 | 6 | -0.950000 | 8.354142343  | 26.726359004 | -10.345082885 | 0 | 0 | 1 | # | oh |
| 2261 | 14 | 3 | -1.050000 | 5.686318349  | 26.723323030 | -12.393982417 | 0 | 0 | 1 | # | ob |

|      |    |   |           |              |               |               |   |   |   |   |     |
|------|----|---|-----------|--------------|---------------|---------------|---|---|---|---|-----|
| 2262 | 14 | 6 | -0.950000 | 5.765792343  | 22.271809004  | -10.345082885 | 0 | 0 | 1 | # | oh  |
| 2263 | 14 | 3 | -1.050000 | 8.274668349  | 22.268773030  | -12.393982417 | 0 | 0 | 1 | # | ob  |
| 2264 | 14 | 3 | -1.050000 | 9.371505513  | 19.499100680  | -8.298868622  | 0 | 0 | 1 | # | ob  |
| 2265 | 14 | 3 | -1.050000 | 5.330210908  | 24.133139700  | -6.099420289  | 0 | 0 | 1 | # | ob  |
| 2266 | 14 | 3 | -1.050000 | 8.746364655  | 23.950251481  | -10.365922068 | 0 | 0 | 1 | # | ob  |
| 2267 | 14 | 3 | -1.050000 | 7.611867264  | 19.668746126  | -12.564346262 | 0 | 0 | 1 | # | ob  |
| 2268 | 14 | 7 | 2.100000  | 9.399697014  | 19.345319204  | -6.669722830  | 0 | 0 | 1 | # | st  |
| 2269 | 14 | 7 | 2.100000  | 8.718727774  | 23.791570782  | -11.994298097 | 0 | 0 | 1 | # | st  |
| 2270 | 14 | 7 | 2.100000  | 6.130402986  | 25.200180796  | -11.995277170 | 0 | 0 | 1 | # | st  |
| 2271 | 14 | 7 | 2.100000  | 8.718752986  | 20.745630796  | -11.995277170 | 0 | 0 | 1 | # | st  |
| 2272 | 14 | 7 | 2.100000  | 9.399722226  | 25.208479218  | -6.670701903  | 0 | 0 | 1 | # | st  |
| 2273 | 14 | 7 | 2.100000  | 6.811372226  | 20.753929218  | -6.670701903  | 0 | 0 | 1 | # | st  |
| 2274 | 14 | 7 | 2.100000  | 6.811347014  | 23.799869204  | -6.669722830  | 0 | 0 | 1 | # | st  |
| 2275 | 14 | 7 | 2.100000  | 6.130377774  | 19.337020782  | -11.994298097 | 0 | 0 | 1 | # | st  |
| 2276 | 14 | 1 | 1.575000  | 7.765255029  | -27.434438432 | -9.332229368  | 0 | 1 | 1 | # | ao  |
| 2277 | 14 | 1 | 1.575000  | 5.176905029  | -22.979888432 | -9.332229368  | 0 | 1 | 1 | # | ao  |
| 2278 | 14 | 1 | 1.575000  | 7.764844971  | -21.474661568 | -9.332770632  | 0 | 1 | 1 | # | ao  |
| 2279 | 14 | 1 | 1.575000  | 10.353194971 | -25.929211568 | -9.332770632  | 0 | 1 | 1 | # | ao  |
| 2280 | 14 | 2 | 0.425000  | 8.911350872  | -24.451832678 | -7.846384937  | 0 | 1 | 1 | # | ho  |
| 2281 | 14 | 2 | 0.425000  | 6.323000872  | 26.730017322  | -7.846384937  | 0 | 0 | 1 | # | ho  |
| 2282 | 14 | 2 | 0.425000  | 6.618749128  | -24.457267322 | -10.818615063 | 0 | 1 | 1 | # | ho  |
| 2283 | 14 | 2 | 0.425000  | 9.207099128  | -20.002717322 | -10.818615063 | 0 | 1 | 1 | # | ho  |
| 2284 | 14 | 3 | -1.050000 | 6.158014655  | -27.231598519 | -10.365922068 | 0 | 1 | 1 | # | ob  |
| 2285 | 14 | 3 | -1.050000 | 10.200217264 | -22.604003874 | -12.564346262 | 0 | 1 | 1 | # | ob  |
| 2286 | 14 | 3 | -1.050000 | 8.746944487  | -26.135450680 | -10.366131378 | 0 | 1 | 1 | # | ob  |
| 2287 | 14 | 3 | -1.050000 | 7.611539092  | -21.860389700 | -12.565579711 | 0 | 1 | 1 | # | ob  |
| 2288 | 14 | 3 | -1.050000 | 6.158594487  | -21.680900680 | -10.366131378 | 0 | 1 | 1 | # | ob  |
| 2289 | 14 | 3 | -1.050000 | 6.783155513  | -22.773649320 | -8.298868622  | 0 | 1 | 1 | # | ob  |
| 2290 | 14 | 3 | -1.050000 | 10.199889092 | -26.314939700 | -12.565579711 | 0 | 1 | 1 | # | ob  |
| 2291 | 14 | 3 | -1.050000 | 6.783735345  | -26.132051481 | -8.299077932  | 0 | 1 | 1 | # | ob  |
| 2292 | 14 | 3 | -1.050000 | 7.918232736  | -21.850546126 | -6.100653738  | 0 | 1 | 1 | # | ob  |
| 2293 | 14 | 3 | -1.050000 | 9.372085345  | -21.677501481 | -8.299077932  | 0 | 1 | 1 | # | ob  |
| 2294 | 14 | 3 | -1.050000 | 5.329882736  | -26.305096126 | -6.100653738  | 0 | 1 | 1 | # | ob  |
| 2295 | 14 | 3 | -1.050000 | 7.918560908  | -27.048710300 | -6.099420289  | 0 | 1 | 1 | # | ob  |
| 2296 | 14 | 6 | -0.950000 | 7.175957657  | 26.728240996  | -8.319917115  | 0 | 0 | 1 | # | oh  |
| 2297 | 14 | 3 | -1.050000 | 9.843781651  | 26.731276970  | -6.271017583  | 0 | 0 | 1 | # | ob  |
| 2298 | 14 | 6 | -0.950000 | 9.764307657  | -24.453609004 | -8.319917115  | 0 | 1 | 1 | # | oh  |
| 2299 | 14 | 3 | -1.050000 | 7.255431651  | -24.450573030 | -6.271017583  | 0 | 1 | 1 | # | ob  |
| 2300 | 14 | 4 | -0.950000 | 8.354142343  | -20.000940996 | -10.345082885 | 0 | 1 | 1 | # | oho |
| 2301 | 14 | 5 | -0.950000 | 5.686318349  | -20.003976970 | -12.393982417 | 0 | 1 | 1 | # | oht |
| 2302 | 14 | 6 | -0.950000 | 5.765792343  | -24.455490996 | -10.345082885 | 0 | 1 | 1 | # | oh  |
| 2303 | 14 | 3 | -1.050000 | 8.274668349  | -24.458526970 | -12.393982417 | 0 | 1 | 1 | # | ob  |
| 2304 | 14 | 3 | -1.050000 | 9.371505513  | -27.228199320 | -8.298868622  | 0 | 1 | 1 | # | ob  |
| 2305 | 14 | 3 | -1.050000 | 5.330210908  | -22.594160300 | -6.099420289  | 0 | 1 | 1 | # | ob  |
| 2306 | 14 | 3 | -1.050000 | 8.746364655  | -22.777048519 | -10.365922068 | 0 | 1 | 1 | # | ob  |
| 2307 | 14 | 3 | -1.050000 | 7.611867264  | -27.058553874 | -12.564346262 | 0 | 1 | 1 | # | ob  |
| 2308 | 14 | 7 | 2.100000  | 9.399697014  | -27.381980796 | -6.669722830  | 0 | 1 | 1 | # | st  |
| 2309 | 14 | 7 | 2.100000  | 8.718727774  | -22.935729218 | -11.994298097 | 0 | 1 | 1 | # | st  |
| 2310 | 14 | 7 | 2.100000  | 6.130402986  | -21.527119204 | -11.995277170 | 0 | 1 | 1 | # | st  |
| 2311 | 14 | 7 | 2.100000  | 8.718752986  | -25.981669204 | -11.995277170 | 0 | 1 | 1 | # | st  |
| 2312 | 14 | 7 | 2.100000  | 9.399722226  | -21.518820782 | -6.670701903  | 0 | 1 | 1 | # | st  |
| 2313 | 14 | 7 | 2.100000  | 6.811372226  | -25.973370782 | -6.670701903  | 0 | 1 | 1 | # | st  |
| 2314 | 14 | 7 | 2.100000  | 6.811347014  | -22.927430796 | -6.669722830  | 0 | 1 | 1 | # | st  |
| 2315 | 14 | 7 | 2.100000  | 6.130377774  | -27.390279218 | -11.994298097 | 0 | 1 | 1 | # | st  |
| 2316 | 14 | 5 | -0.950000 | 9.914166427  | -19.680858114 | 2.588720950   | 0 | 1 | 1 | # | oht |
| 2317 | 14 | 5 | -0.950000 | 5.481638203  | -0.272172439  | -2.801727113  | 0 | 0 | 1 | # | oht |
| 2318 | 14 | 2 | 0.425000  | 5.133272253  | -1.308055357  | -2.995860493  | 0 | 0 | 1 | # | ho  |
| 2319 | 14 | 2 | 0.425000  | 10.176688619 | -1.054326608  | 3.097070537   | 0 | 0 | 1 | # | ho  |
| 2320 | 14 | 2 | 0.425000  | 10.040548964 | -18.596754758 | 2.386613544   | 0 | 1 | 1 | # | ho  |
| 2321 | 14 | 2 | 0.425000  | 5.289748915  | -19.012312375 | -3.363863051  | 0 | 1 | 1 | # | ho  |
| 2322 | 15 | 1 | 1.575000  | 12.941955029 | 1.474661568   | -9.332229368  | 0 | 0 | 1 | # | ao  |
| 2323 | 15 | 1 | 1.575000  | 10.353605029 | 5.929211568   | -9.332229368  | 0 | 0 | 1 | # | ao  |
| 2324 | 15 | 1 | 1.575000  | 12.941544971 | 7.434438432   | -9.332770632  | 0 | 0 | 1 | # | ao  |
| 2325 | 15 | 1 | 1.575000  | 15.529894971 | 2.979888432   | -9.332770632  | 0 | 0 | 1 | # | ao  |
| 2326 | 15 | 2 | 0.425000  | 14.088050872 | 4.457267322   | -7.846384937  | 0 | 0 | 1 | # | ho  |
| 2327 | 15 | 2 | 0.425000  | 11.499700872 | 0.002717322   | -7.846384937  | 0 | 0 | 1 | # | ho  |
| 2328 | 15 | 2 | 0.425000  | 11.795449128 | 4.451832678   | -10.818615063 | 0 | 0 | 1 | # | ho  |
| 2329 | 15 | 2 | 0.425000  | 14.383799128 | 8.906382678   | -10.818615063 | 0 | 0 | 1 | # | ho  |
| 2330 | 15 | 3 | -1.050000 | 11.334714655 | 1.677501481   | -10.365922068 | 0 | 0 | 1 | # | ob  |
| 2331 | 15 | 3 | -1.050000 | 15.376917264 | 6.305096126   | -12.564346262 | 0 | 0 | 1 | # | ob  |
| 2332 | 15 | 3 | -1.050000 | 13.923644487 | 2.773649320   | -10.366131378 | 0 | 0 | 1 | # | ob  |
| 2333 | 15 | 3 | -1.050000 | 12.788239092 | 7.048710300   | -12.565579711 | 0 | 0 | 1 | # | ob  |
| 2334 | 15 | 3 | -1.050000 | 11.335294487 | 7.228199320   | -10.366131378 | 0 | 0 | 1 | # | ob  |
| 2335 | 15 | 3 | -1.050000 | 11.959855513 | 6.135450680   | -8.298868622  | 0 | 0 | 1 | # | ob  |
| 2336 | 15 | 3 | -1.050000 | 15.376589092 | 2.594160300   | -12.565579711 | 0 | 0 | 1 | # | ob  |
| 2337 | 15 | 3 | -1.050000 | 11.960435345 | 2.777048519   | -8.299077932  | 0 | 0 | 1 | # | ob  |
| 2338 | 15 | 3 | -1.050000 | 13.094932736 | 7.058553874   | -6.100653738  | 0 | 0 | 1 | # | ob  |
| 2339 | 15 | 3 | -1.050000 | 14.548785345 | 7.231598519   | -8.299077932  | 0 | 0 | 1 | # | ob  |
| 2340 | 15 | 3 | -1.050000 | 10.506582736 | 2.604003874   | -6.100653738  | 0 | 0 | 1 | # | ob  |
| 2341 | 15 | 3 | -1.050000 | 13.095260908 | 1.860389700   | -6.099420289  | 0 | 0 | 1 | # | ob  |
| 2342 | 15 | 4 | -0.950000 | 12.352657657 | 0.000940996   | -8.319917115  | 0 | 0 | 1 | # | oho |
| 2343 | 15 | 5 | -0.950000 | 15.020481651 | 0.003976970   | -6.271017583  | 0 | 0 | 1 | # | oht |
| 2344 | 15 | 6 | -0.950000 | 14.941007657 | 4.455490996   | -8.319917115  | 0 | 0 | 1 | # | oh  |
| 2345 | 15 | 3 | -1.050000 | 12.432131651 | 4.458526970   | -6.271017583  | 0 | 0 | 1 | # | ob  |
| 2346 | 15 | 6 | -0.950000 | 13.530842343 | 8.908159004   | -10.345082885 | 0 | 0 | 1 | # | oh  |
| 2347 | 15 | 3 | -1.050000 | 10.863018349 | 8.905123030   | -12.393982417 | 0 | 0 | 1 | # | ob  |
| 2348 | 15 | 6 | -0.950000 | 10.942492343 | 4.453609004   | -10.345082885 | 0 | 0 | 1 | # | oh  |
| 2349 | 15 | 3 | -1.050000 | 13.451368349 | 4.450573030   | -12.393982417 | 0 | 0 | 1 | # | ob  |
| 2350 | 15 | 3 | -1.050000 | 14.548205513 | 1.680900680   | -8.298868622  | 0 | 0 | 1 | # | ob  |
| 2351 | 15 | 3 | -1.050000 | 10.506910908 | 6.314939700   | -6.099420289  | 0 | 0 | 1 | # | ob  |
| 2352 | 15 | 3 | -1.050000 | 13.923064655 | 6.132051481   | -10.365922068 | 0 | 0 | 1 | # | ob  |
| 2353 | 15 | 3 | -1.050000 | 12.788567264 | 1.850546126   | -12.564346262 | 0 | 0 | 1 | # | ob  |
| 2354 | 15 | 7 | 2.100000  | 14.576397014 | 1.527119204   | -6.669722830  | 0 | 0 | 1 | # | st  |



|      |    |   |           |              |               |               |   |   |   |   |    |
|------|----|---|-----------|--------------|---------------|---------------|---|---|---|---|----|
| 2355 | 15 | 7 | 2.100000  | 13.895427774 | 5.973370782   | -11.994298097 | 0 | 0 | 1 | # | st |
| 2356 | 15 | 7 | 2.100000  | 11.307102986 | 7.381980796   | -11.995277170 | 0 | 0 | 1 | # | st |
| 2357 | 15 | 7 | 2.100000  | 13.895452986 | 2.927430796   | -11.995277170 | 0 | 0 | 1 | # | st |
| 2358 | 15 | 7 | 2.100000  | 14.576422226 | 7.390279218   | -6.670701903  | 0 | 0 | 1 | # | st |
| 2359 | 15 | 7 | 2.100000  | 11.988072226 | 2.935729218   | -6.670701903  | 0 | 0 | 1 | # | st |
| 2360 | 15 | 7 | 2.100000  | 11.988047014 | 5.981669204   | -6.669722830  | 0 | 0 | 1 | # | st |
| 2361 | 15 | 7 | 2.100000  | 11.307077774 | 1.518820782   | -11.994298097 | 0 | 0 | 1 | # | st |
| 2362 | 15 | 1 | 1.575000  | 12.941955029 | 10.383761568  | -9.332229368  | 0 | 0 | 1 | # | ao |
| 2363 | 15 | 1 | 1.575000  | 10.353605029 | 14.838311568  | -9.332229368  | 0 | 0 | 1 | # | ao |
| 2364 | 15 | 1 | 1.575000  | 12.941544971 | 16.343538432  | -9.332770632  | 0 | 0 | 1 | # | ao |
| 2365 | 15 | 1 | 1.575000  | 15.529894971 | 11.888988432  | -9.332770632  | 0 | 0 | 1 | # | ao |
| 2366 | 15 | 2 | 0.425000  | 14.088050872 | 13.366367322  | -7.846384937  | 0 | 0 | 1 | # | ho |
| 2367 | 15 | 2 | 0.425000  | 11.499700872 | 8.911817322   | -7.846384937  | 0 | 0 | 1 | # | ho |
| 2368 | 15 | 2 | 0.425000  | 11.795449128 | 13.360932678  | -10.818615063 | 0 | 0 | 1 | # | ho |
| 2369 | 15 | 2 | 0.425000  | 14.383799128 | 17.815482678  | -10.818615063 | 0 | 0 | 1 | # | ho |
| 2370 | 15 | 3 | -1.050000 | 11.334714655 | 10.586601481  | -10.365922068 | 0 | 0 | 1 | # | ob |
| 2371 | 15 | 3 | -1.050000 | 15.376917264 | 15.214196126  | -12.564346262 | 0 | 0 | 1 | # | ob |
| 2372 | 15 | 3 | -1.050000 | 13.923644487 | 11.682749320  | -10.366131378 | 0 | 0 | 1 | # | ob |
| 2373 | 15 | 3 | -1.050000 | 12.788239092 | 15.957810300  | -12.565579711 | 0 | 0 | 1 | # | ob |
| 2374 | 15 | 3 | -1.050000 | 11.335294487 | 16.137299320  | -10.366131378 | 0 | 0 | 1 | # | ob |
| 2375 | 15 | 3 | -1.050000 | 11.959855513 | 15.044550680  | -8.298868622  | 0 | 0 | 1 | # | ob |
| 2376 | 15 | 3 | -1.050000 | 15.376589092 | 11.503260300  | -12.565579711 | 0 | 0 | 1 | # | ob |
| 2377 | 15 | 3 | -1.050000 | 11.960435345 | 11.686148519  | -8.299077932  | 0 | 0 | 1 | # | ob |
| 2378 | 15 | 3 | -1.050000 | 13.094932736 | 15.967653874  | -6.100653738  | 0 | 0 | 1 | # | ob |
| 2379 | 15 | 3 | -1.050000 | 14.548785345 | 16.140698519  | -8.299077932  | 0 | 0 | 1 | # | ob |
| 2380 | 15 | 3 | -1.050000 | 10.506582736 | 11.513103874  | -6.100653738  | 0 | 0 | 1 | # | ob |
| 2381 | 15 | 3 | -1.050000 | 13.095260908 | 10.769489700  | -6.099420289  | 0 | 0 | 1 | # | ob |
| 2382 | 15 | 6 | -0.950000 | 12.352657657 | 8.910040996   | -8.319917115  | 0 | 0 | 1 | # | oh |
| 2383 | 15 | 3 | -1.050000 | 15.020481651 | 8.913076970   | -6.271017583  | 0 | 0 | 1 | # | ob |
| 2384 | 15 | 6 | -0.950000 | 14.941007657 | 13.364590996  | -8.319917115  | 0 | 0 | 1 | # | oh |
| 2385 | 15 | 3 | -1.050000 | 12.432131651 | 13.367626970  | -6.271017583  | 0 | 0 | 1 | # | ob |
| 2386 | 15 | 6 | -0.950000 | 13.530842343 | 17.817259004  | -10.345082885 | 0 | 0 | 1 | # | oh |
| 2387 | 15 | 3 | -1.050000 | 10.863018349 | 17.814223030  | -12.393982417 | 0 | 0 | 1 | # | ob |
| 2388 | 15 | 6 | -0.950000 | 10.942492343 | 13.362709004  | -10.345082885 | 0 | 0 | 1 | # | oh |
| 2389 | 15 | 3 | -1.050000 | 13.451368349 | 13.359673030  | -12.393982417 | 0 | 0 | 1 | # | ob |
| 2390 | 15 | 3 | -1.050000 | 14.548205513 | 10.590000680  | -8.298868622  | 0 | 0 | 1 | # | ob |
| 2391 | 15 | 3 | -1.050000 | 10.506910908 | 15.224039700  | -6.099420289  | 0 | 0 | 1 | # | ob |
| 2392 | 15 | 3 | -1.050000 | 13.923064655 | 15.041151481  | -10.365922068 | 0 | 0 | 1 | # | ob |
| 2393 | 15 | 3 | -1.050000 | 12.788567264 | 10.759646126  | -12.564346262 | 0 | 0 | 1 | # | ob |
| 2394 | 15 | 7 | 2.100000  | 14.576397014 | 10.436219204  | -6.669722830  | 0 | 0 | 1 | # | st |
| 2395 | 15 | 7 | 2.100000  | 13.895427774 | 14.882470782  | -11.994298097 | 0 | 0 | 1 | # | st |
| 2396 | 15 | 7 | 2.100000  | 11.307102986 | 16.291080796  | -11.995277170 | 0 | 0 | 1 | # | st |
| 2397 | 15 | 7 | 2.100000  | 13.895452986 | 11.836530796  | -11.995277170 | 0 | 0 | 1 | # | st |
| 2398 | 15 | 7 | 2.100000  | 14.576422226 | 16.299379218  | -6.670701903  | 0 | 0 | 1 | # | st |
| 2399 | 15 | 7 | 2.100000  | 11.988072226 | 11.844829218  | -6.670701903  | 0 | 0 | 1 | # | st |
| 2400 | 15 | 7 | 2.100000  | 11.988047014 | 14.890769204  | -6.669722830  | 0 | 0 | 1 | # | st |
| 2401 | 15 | 7 | 2.100000  | 11.307077774 | 10.427920782  | -11.994298097 | 0 | 0 | 1 | # | st |
| 2402 | 15 | 1 | 1.575000  | 12.941955029 | 19.292861568  | -9.332229368  | 0 | 0 | 1 | # | ao |
| 2403 | 15 | 1 | 1.575000  | 10.353605029 | 23.747411568  | -9.332229368  | 0 | 0 | 1 | # | ao |
| 2404 | 15 | 1 | 1.575000  | 12.941544971 | 25.252638432  | -9.332770632  | 0 | 0 | 1 | # | ao |
| 2405 | 15 | 1 | 1.575000  | 15.529894971 | 20.798088432  | -9.332770632  | 0 | 0 | 1 | # | ao |
| 2406 | 15 | 2 | 0.425000  | 14.088050872 | 22.275467322  | -7.846384937  | 0 | 0 | 1 | # | ho |
| 2407 | 15 | 2 | 0.425000  | 11.499700872 | 17.820917322  | -7.846384937  | 0 | 0 | 1 | # | ho |
| 2408 | 15 | 2 | 0.425000  | 11.795449128 | 22.270032678  | -10.818615063 | 0 | 0 | 1 | # | ho |
| 2409 | 15 | 2 | 0.425000  | 14.383799128 | 26.724582678  | -10.818615063 | 0 | 0 | 1 | # | ho |
| 2410 | 15 | 3 | -1.050000 | 11.334714655 | 19.495701481  | -10.365922068 | 0 | 0 | 1 | # | ob |
| 2411 | 15 | 3 | -1.050000 | 15.376917264 | 24.123296126  | -12.564346262 | 0 | 0 | 1 | # | ob |
| 2412 | 15 | 3 | -1.050000 | 13.923644487 | 20.591849320  | -10.366131378 | 0 | 0 | 1 | # | ob |
| 2413 | 15 | 3 | -1.050000 | 12.788239092 | 24.866910300  | -12.565579711 | 0 | 0 | 1 | # | ob |
| 2414 | 15 | 3 | -1.050000 | 11.335294487 | 25.046399320  | -10.366131378 | 0 | 0 | 1 | # | ob |
| 2415 | 15 | 3 | -1.050000 | 11.959855513 | 23.953650680  | -8.298868622  | 0 | 0 | 1 | # | ob |
| 2416 | 15 | 3 | -1.050000 | 15.376589092 | 20.412360300  | -12.565579711 | 0 | 0 | 1 | # | ob |
| 2417 | 15 | 3 | -1.050000 | 11.960435345 | 20.595248519  | -8.299077932  | 0 | 0 | 1 | # | ob |
| 2418 | 15 | 3 | -1.050000 | 13.094932736 | 24.876753874  | -6.100653738  | 0 | 0 | 1 | # | ob |
| 2419 | 15 | 3 | -1.050000 | 14.548785345 | 25.049798519  | -8.299077932  | 0 | 0 | 1 | # | ob |
| 2420 | 15 | 3 | -1.050000 | 10.506582736 | 20.422203874  | -6.100653738  | 0 | 0 | 1 | # | ob |
| 2421 | 15 | 3 | -1.050000 | 13.095260908 | 19.678589700  | -6.099420289  | 0 | 0 | 1 | # | ob |
| 2422 | 15 | 6 | -0.950000 | 12.352657657 | 17.819140996  | -8.319917115  | 0 | 0 | 1 | # | oh |
| 2423 | 15 | 3 | -1.050000 | 15.020481651 | 17.822176970  | -6.271017583  | 0 | 0 | 1 | # | ob |
| 2424 | 15 | 6 | -0.950000 | 14.941007657 | 22.273690996  | -8.319917115  | 0 | 0 | 1 | # | oh |
| 2425 | 15 | 3 | -1.050000 | 12.432131651 | 22.276726970  | -6.271017583  | 0 | 0 | 1 | # | ob |
| 2426 | 15 | 6 | -0.950000 | 13.530842343 | 26.726359004  | -10.345082885 | 0 | 0 | 1 | # | oh |
| 2427 | 15 | 3 | -1.050000 | 10.863018349 | 26.723323030  | -12.393982417 | 0 | 0 | 1 | # | ob |
| 2428 | 15 | 6 | -0.950000 | 10.942492343 | 22.271809004  | -10.345082885 | 0 | 0 | 1 | # | oh |
| 2429 | 15 | 3 | -1.050000 | 13.451368349 | 22.268773030  | -12.393982417 | 0 | 0 | 1 | # | ob |
| 2430 | 15 | 3 | -1.050000 | 14.548205513 | 19.499100680  | -8.298868622  | 0 | 0 | 1 | # | ob |
| 2431 | 15 | 3 | -1.050000 | 10.506910908 | 24.133139700  | -6.099420289  | 0 | 0 | 1 | # | ob |
| 2432 | 15 | 3 | -1.050000 | 13.923064655 | 23.950251481  | -10.365922068 | 0 | 0 | 1 | # | ob |
| 2433 | 15 | 3 | -1.050000 | 12.788567264 | 19.668746126  | -12.564346262 | 0 | 0 | 1 | # | ob |
| 2434 | 15 | 7 | 2.100000  | 14.576397014 | 19.345319204  | -6.669722830  | 0 | 0 | 1 | # | st |
| 2435 | 15 | 7 | 2.100000  | 13.895427774 | 23.791570782  | -11.994298097 | 0 | 0 | 1 | # | st |
| 2436 | 15 | 7 | 2.100000  | 11.307102986 | 25.200180796  | -11.995277170 | 0 | 0 | 1 | # | st |
| 2437 | 15 | 7 | 2.100000  | 13.895452986 | 20.745630796  | -11.995277170 | 0 | 0 | 1 | # | st |
| 2438 | 15 | 7 | 2.100000  | 14.576422226 | 25.208479218  | -6.670701903  | 0 | 0 | 1 | # | st |
| 2439 | 15 | 7 | 2.100000  | 11.988072226 | 20.753929218  | -6.670701903  | 0 | 0 | 1 | # | st |
| 2440 | 15 | 7 | 2.100000  | 11.988047014 | 23.799869204  | -6.669722830  | 0 | 0 | 1 | # | st |
| 2441 | 15 | 7 | 2.100000  | 11.307077774 | 19.337020782  | -11.994298097 | 0 | 0 | 1 | # | st |
| 2442 | 15 | 1 | 1.575000  | 12.941955029 | -27.434438432 | -9.332229368  | 0 | 1 | 1 | # | ao |
| 2443 | 15 | 1 | 1.575000  | 10.353605029 | -22.979888432 | -9.332229368  | 0 | 1 | 1 | # | ao |
| 2444 | 15 | 1 | 1.575000  | 12.941544971 | -21.474661568 | -9.332770632  | 0 | 1 | 1 | # | ao |
| 2445 | 15 | 1 | 1.575000  | 15.529894971 | -25.929211568 | -9.332770632  | 0 | 1 | 1 | # | ao |
| 2446 | 15 | 2 | 0.425000  | 14.088050872 | -24.451832678 | -7.846384937  | 0 | 1 | 1 | # | ho |
| 2447 | 15 | 2 | 0.425000  | 11.499700872 | 26.730017322  | -7.846384937  | 0 | 0 | 1 | # | ho |

|      |    |   |           |               |               |               |   |   |   |   |     |
|------|----|---|-----------|---------------|---------------|---------------|---|---|---|---|-----|
| 2448 | 15 | 2 | 0.425000  | 11.795449128  | -24.457267322 | -10.818615063 | 0 | 1 | 1 | # | ho  |
| 2449 | 15 | 2 | 0.425000  | 14.383799128  | -20.002717322 | -10.818615063 | 0 | 1 | 1 | # | ho  |
| 2450 | 15 | 3 | -1.050000 | 11.334714655  | -27.231598519 | -10.365922068 | 0 | 1 | 1 | # | ob  |
| 2451 | 15 | 3 | -1.050000 | 15.376917264  | -22.604003874 | -12.564346262 | 0 | 1 | 1 | # | ob  |
| 2452 | 15 | 3 | -1.050000 | 13.923644487  | -26.135450680 | -10.366131378 | 0 | 1 | 1 | # | ob  |
| 2453 | 15 | 3 | -1.050000 | 12.788239092  | -21.860389700 | -12.565579711 | 0 | 1 | 1 | # | ob  |
| 2454 | 15 | 3 | -1.050000 | 11.335294487  | -21.680900680 | -10.366131378 | 0 | 1 | 1 | # | ob  |
| 2455 | 15 | 3 | -1.050000 | 11.959855513  | -22.773649320 | -8.298868622  | 0 | 1 | 1 | # | ob  |
| 2456 | 15 | 3 | -1.050000 | 15.376589092  | -26.314939700 | -12.565579711 | 0 | 1 | 1 | # | ob  |
| 2457 | 15 | 3 | -1.050000 | 11.960435345  | -26.132051481 | -8.299077932  | 0 | 1 | 1 | # | ob  |
| 2458 | 15 | 3 | -1.050000 | 13.094932736  | -21.850546126 | -6.100653738  | 0 | 1 | 1 | # | ob  |
| 2459 | 15 | 3 | -1.050000 | 14.548785345  | -21.677501481 | -8.299077932  | 0 | 1 | 1 | # | ob  |
| 2460 | 15 | 3 | -1.050000 | 10.506582736  | -26.305096126 | -6.100653738  | 0 | 1 | 1 | # | ob  |
| 2461 | 15 | 3 | -1.050000 | 13.095260908  | -27.048710300 | -6.099420289  | 0 | 1 | 1 | # | ob  |
| 2462 | 15 | 6 | -0.950000 | 12.352657657  | 26.728240996  | -8.319917115  | 0 | 0 | 1 | # | oh  |
| 2463 | 15 | 3 | -1.050000 | 15.020481651  | 26.731276970  | -6.271017583  | 0 | 0 | 1 | # | ob  |
| 2464 | 15 | 6 | -0.950000 | 14.941007657  | -24.453609004 | -8.319917115  | 0 | 1 | 1 | # | oh  |
| 2465 | 15 | 3 | -1.050000 | 12.432131651  | -24.450573030 | -6.271017583  | 0 | 1 | 1 | # | ob  |
| 2466 | 15 | 4 | -0.950000 | 13.530842343  | -20.000940996 | -10.345082885 | 0 | 1 | 1 | # | oht |
| 2467 | 15 | 5 | -0.950000 | 10.863018349  | -20.003976970 | -12.393982417 | 0 | 1 | 1 | # | oht |
| 2468 | 15 | 6 | -0.950000 | 10.942492343  | -24.455490996 | -10.345082885 | 0 | 1 | 1 | # | oh  |
| 2469 | 15 | 3 | -1.050000 | 13.451368349  | -24.458526970 | -12.393982417 | 0 | 1 | 1 | # | ob  |
| 2470 | 15 | 3 | -1.050000 | 14.548205513  | -27.228199320 | -8.298868622  | 0 | 1 | 1 | # | ob  |
| 2471 | 15 | 3 | -1.050000 | 10.506910908  | -22.594160300 | -6.099420289  | 0 | 1 | 1 | # | ob  |
| 2472 | 15 | 3 | -1.050000 | 13.923064655  | -22.777048519 | -10.365922068 | 0 | 1 | 1 | # | ob  |
| 2473 | 15 | 3 | -1.050000 | 12.788567264  | -27.058553874 | -12.564346262 | 0 | 1 | 1 | # | ob  |
| 2474 | 15 | 7 | 2.100000  | 14.576397014  | -27.381980796 | -6.669722830  | 0 | 1 | 1 | # | st  |
| 2475 | 15 | 7 | 2.100000  | 13.895427774  | -22.935729218 | -11.994298097 | 0 | 1 | 1 | # | st  |
| 2476 | 15 | 7 | 2.100000  | 11.307102986  | -21.527119204 | -11.995277170 | 0 | 1 | 1 | # | st  |
| 2477 | 15 | 7 | 2.100000  | 13.895452986  | -25.981669204 | -11.995277170 | 0 | 1 | 1 | # | st  |
| 2478 | 15 | 7 | 2.100000  | 14.576422226  | -21.518820782 | -6.670701903  | 0 | 1 | 1 | # | st  |
| 2479 | 15 | 7 | 2.100000  | 11.988072226  | -25.973370782 | -6.670701903  | 0 | 1 | 1 | # | st  |
| 2480 | 15 | 7 | 2.100000  | 11.988047014  | -22.927430796 | -6.669722830  | 0 | 1 | 1 | # | st  |
| 2481 | 15 | 7 | 2.100000  | 11.307077774  | -27.390279218 | -11.994298097 | 0 | 1 | 1 | # | st  |
| 2482 | 15 | 5 | -0.950000 | 15.090866427  | -19.680858114 | 2.588720950   | 0 | 1 | 1 | # | oht |
| 2483 | 15 | 5 | -0.950000 | 10.658338203  | -0.272172439  | -2.801727113  | 0 | 0 | 1 | # | oht |
| 2484 | 15 | 2 | 0.425000  | 10.309972253  | -1.308055357  | -2.995860493  | 0 | 0 | 1 | # | ho  |
| 2485 | 15 | 2 | 0.425000  | 15.353388619  | -1.054326608  | 3.097070537   | 0 | 0 | 1 | # | ho  |
| 2486 | 15 | 2 | 0.425000  | 15.217248964  | -18.596754758 | 2.386613544   | 0 | 1 | 1 | # | ho  |
| 2487 | 15 | 2 | 0.425000  | 10.466448915  | -19.012312375 | -3.363863051  | 0 | 1 | 1 | # | ho  |
| 2488 | 16 | 1 | 1.575000  | -12.941544971 | 1.474661568   | -9.332229368  | 1 | 0 | 1 | # | ao  |
| 2489 | 16 | 1 | 1.575000  | -15.529894971 | 5.929211568   | -9.332229368  | 1 | 0 | 1 | # | ao  |
| 2490 | 16 | 1 | 1.575000  | -12.941955029 | 7.434438432   | -9.332770632  | 1 | 0 | 1 | # | ao  |
| 2491 | 16 | 1 | 1.575000  | -10.353605029 | 2.979888432   | -9.332770632  | 1 | 0 | 1 | # | ao  |
| 2492 | 16 | 2 | 0.425000  | -11.795449128 | 4.457267322   | -7.846384937  | 1 | 0 | 1 | # | ho  |
| 2493 | 16 | 2 | 0.425000  | -14.383799128 | 0.002717322   | -7.846384937  | 1 | 0 | 1 | # | ho  |
| 2494 | 16 | 2 | 0.425000  | -14.088050872 | 4.451832678   | -10.818615063 | 1 | 0 | 1 | # | ho  |
| 2495 | 16 | 2 | 0.425000  | -11.499700872 | 8.906382678   | -10.818615063 | 1 | 0 | 1 | # | ho  |
| 2496 | 16 | 3 | -1.050000 | -14.548785345 | 1.677501481   | -10.365922068 | 1 | 0 | 1 | # | ob  |
| 2497 | 16 | 3 | -1.050000 | -10.506582736 | 6.305096126   | -12.564346262 | 1 | 0 | 1 | # | ob  |
| 2498 | 16 | 3 | -1.050000 | -11.959855513 | 2.773649320   | -10.366131378 | 1 | 0 | 1 | # | ob  |
| 2499 | 16 | 3 | -1.050000 | -13.095260908 | 7.048710300   | -12.565579711 | 1 | 0 | 1 | # | ob  |
| 2500 | 16 | 3 | -1.050000 | -14.548205513 | 7.228199320   | -10.366131378 | 1 | 0 | 1 | # | ob  |
| 2501 | 16 | 3 | -1.050000 | -13.923644487 | 6.135450680   | -8.298868622  | 1 | 0 | 1 | # | ob  |
| 2502 | 16 | 3 | -1.050000 | -10.506910908 | 2.594160300   | -12.565579711 | 1 | 0 | 1 | # | ob  |
| 2503 | 16 | 3 | -1.050000 | -13.923064655 | 2.777048519   | -8.299077932  | 1 | 0 | 1 | # | ob  |
| 2504 | 16 | 3 | -1.050000 | -12.788567264 | 7.058553874   | -6.100653738  | 1 | 0 | 1 | # | ob  |
| 2505 | 16 | 3 | -1.050000 | -11.334714655 | 7.231598519   | -8.299077932  | 1 | 0 | 1 | # | ob  |
| 2506 | 16 | 3 | -1.050000 | -15.376917264 | 2.604003874   | -6.100653738  | 1 | 0 | 1 | # | ob  |
| 2507 | 16 | 3 | -1.050000 | -12.788239092 | 1.860389700   | -6.099420289  | 1 | 0 | 1 | # | ob  |
| 2508 | 16 | 4 | -0.950000 | -13.530842343 | 0.000940996   | -8.319917115  | 1 | 0 | 1 | # | oho |
| 2509 | 16 | 5 | -0.950000 | -10.863018349 | 0.003976970   | -6.271017583  | 1 | 0 | 1 | # | oht |
| 2510 | 16 | 6 | -0.950000 | -10.942492343 | 4.455490996   | -8.319917115  | 1 | 0 | 1 | # | oh  |
| 2511 | 16 | 3 | -1.050000 | -13.451368349 | 4.458526970   | -6.271017583  | 1 | 0 | 1 | # | ob  |
| 2512 | 16 | 6 | -0.950000 | -12.352657657 | 8.908159004   | -10.345082885 | 1 | 0 | 1 | # | oh  |
| 2513 | 16 | 3 | -1.050000 | -15.020481651 | 8.905123030   | -12.393982417 | 1 | 0 | 1 | # | ob  |
| 2514 | 16 | 6 | -0.950000 | -14.941007657 | 4.453609004   | -10.345082885 | 1 | 0 | 1 | # | oh  |
| 2515 | 16 | 3 | -1.050000 | -12.432131651 | 4.450573030   | -12.393982417 | 1 | 0 | 1 | # | ob  |
| 2516 | 16 | 3 | -1.050000 | -11.335294487 | 1.680900680   | -8.298868622  | 1 | 0 | 1 | # | ob  |
| 2517 | 16 | 3 | -1.050000 | -15.376589092 | 6.314939700   | -6.099420289  | 1 | 0 | 1 | # | ob  |
| 2518 | 16 | 3 | -1.050000 | -11.960435345 | 6.132051481   | -10.365922068 | 1 | 0 | 1 | # | ob  |
| 2519 | 16 | 3 | -1.050000 | -13.094932736 | 1.850546126   | -12.564346262 | 1 | 0 | 1 | # | ob  |
| 2520 | 16 | 7 | 2.100000  | -11.307102986 | 1.527119204   | -6.669722830  | 1 | 0 | 1 | # | st  |
| 2521 | 16 | 7 | 2.100000  | -11.988072226 | 5.973370782   | -11.994298097 | 1 | 0 | 1 | # | st  |
| 2522 | 16 | 7 | 2.100000  | -14.576397014 | 7.381980796   | -11.995277170 | 1 | 0 | 1 | # | st  |
| 2523 | 16 | 7 | 2.100000  | -11.988047014 | 2.927430796   | -11.995277170 | 1 | 0 | 1 | # | st  |
| 2524 | 16 | 7 | 2.100000  | -11.307077774 | 7.390279218   | -6.670701903  | 1 | 0 | 1 | # | st  |
| 2525 | 16 | 7 | 2.100000  | -13.895427774 | 2.935729218   | -6.670701903  | 1 | 0 | 1 | # | st  |
| 2526 | 16 | 7 | 2.100000  | -13.895452986 | 5.981669204   | -6.669722830  | 1 | 0 | 1 | # | st  |
| 2527 | 16 | 7 | 2.100000  | -14.576422226 | 1.518820782   | -11.994298097 | 1 | 0 | 1 | # | st  |
| 2528 | 16 | 1 | 1.575000  | -12.941544971 | 10.383761568  | -9.332229368  | 1 | 0 | 1 | # | ao  |
| 2529 | 16 | 1 | 1.575000  | -15.529894971 | 14.838311568  | -9.332229368  | 1 | 0 | 1 | # | ao  |
| 2530 | 16 | 1 | 1.575000  | -12.941955029 | 16.343538432  | -9.332770632  | 1 | 0 | 1 | # | ao  |
| 2531 | 16 | 1 | 1.575000  | -10.353605029 | 11.888988432  | -9.332770632  | 1 | 0 | 1 | # | ao  |
| 2532 | 16 | 2 | 0.425000  | -11.795449128 | 13.366367322  | -7.846384937  | 1 | 0 | 1 | # | ho  |
| 2533 | 16 | 2 | 0.425000  | -14.383799128 | 8.911817322   | -7.846384937  | 1 | 0 | 1 | # | ho  |
| 2534 | 16 | 2 | 0.425000  | -14.088050872 | 13.360932678  | -10.818615063 | 1 | 0 | 1 | # | ho  |
| 2535 | 16 | 2 | 0.425000  | -11.499700872 | 17.815482678  | -10.818615063 | 1 | 0 | 1 | # | ho  |
| 2536 | 16 | 3 | -1.050000 | -14.548785345 | 10.586601481  | -10.365922068 | 1 | 0 | 1 | # | ob  |
| 2537 | 16 | 3 | -1.050000 | -10.506582736 | 15.214196126  | -12.564346262 | 1 | 0 | 1 | # | ob  |
| 2538 | 16 | 3 | -1.050000 | -11.959855513 | 11.682749320  | -10.366131378 | 1 | 0 | 1 | # | ob  |
| 2539 | 16 | 3 | -1.050000 | -13.095260908 | 15.957810300  | -12.565579711 | 1 | 0 | 1 | # | ob  |
| 2540 | 16 | 3 | -1.050000 | -14.548205513 | 16.137299320  | -10.366131378 | 1 | 0 | 1 | # | ob  |

|      |    |   |           |               |               |               |   |   |   |   |     |
|------|----|---|-----------|---------------|---------------|---------------|---|---|---|---|-----|
| 2541 | 16 | 3 | -1.050000 | -13.923644487 | 15.044550680  | -8.298868622  | 1 | 0 | 1 | # | ob  |
| 2542 | 16 | 3 | -1.050000 | -10.506910908 | 11.503260300  | -12.565579711 | 1 | 0 | 1 | # | ob  |
| 2543 | 16 | 3 | -1.050000 | -13.923064655 | 11.686148519  | -8.299077932  | 1 | 0 | 1 | # | ob  |
| 2544 | 16 | 3 | -1.050000 | -12.788567264 | 15.967653874  | -6.100653738  | 1 | 0 | 1 | # | ob  |
| 2545 | 16 | 3 | -1.050000 | -11.334714655 | 16.140698519  | -8.299077932  | 1 | 0 | 1 | # | ob  |
| 2546 | 16 | 3 | -1.050000 | -15.376917264 | 11.513103874  | -6.100653738  | 1 | 0 | 1 | # | ob  |
| 2547 | 16 | 3 | -1.050000 | -12.788239092 | 10.769489700  | -6.099420289  | 1 | 0 | 1 | # | ob  |
| 2548 | 16 | 6 | -0.950000 | -13.530842343 | 8.910040996   | -8.319917115  | 1 | 0 | 1 | # | oh  |
| 2549 | 16 | 3 | -1.050000 | -10.863018349 | 8.913076970   | -6.271017583  | 1 | 0 | 1 | # | ob  |
| 2550 | 16 | 6 | -0.950000 | -10.942492343 | 13.364590996  | -8.319917115  | 1 | 0 | 1 | # | oh  |
| 2551 | 16 | 3 | -1.050000 | -13.451368349 | 13.367626970  | -6.271017583  | 1 | 0 | 1 | # | ob  |
| 2552 | 16 | 6 | -0.950000 | -12.352657657 | 17.817259004  | -10.345082885 | 1 | 0 | 1 | # | oh  |
| 2553 | 16 | 3 | -1.050000 | -15.020481651 | 17.814223030  | -12.393982417 | 1 | 0 | 1 | # | ob  |
| 2554 | 16 | 6 | -0.950000 | -14.941007657 | 13.362709004  | -10.345082885 | 1 | 0 | 1 | # | oh  |
| 2555 | 16 | 3 | -1.050000 | -12.432131651 | 13.359673030  | -12.393982417 | 1 | 0 | 1 | # | ob  |
| 2556 | 16 | 3 | -1.050000 | -11.335294487 | 10.590000680  | -8.298868622  | 1 | 0 | 1 | # | ob  |
| 2557 | 16 | 3 | -1.050000 | -15.376589092 | 15.224039700  | -6.099420289  | 1 | 0 | 1 | # | ob  |
| 2558 | 16 | 3 | -1.050000 | -11.960435345 | 15.041151481  | -10.365922068 | 1 | 0 | 1 | # | ob  |
| 2559 | 16 | 3 | -1.050000 | -13.094932736 | 10.759646126  | -12.564346262 | 1 | 0 | 1 | # | ob  |
| 2560 | 16 | 7 | 2.100000  | -11.307102986 | 10.436219204  | -6.669722830  | 1 | 0 | 1 | # | st  |
| 2561 | 16 | 7 | 2.100000  | -11.988072226 | 14.882470782  | -11.994298097 | 1 | 0 | 1 | # | st  |
| 2562 | 16 | 7 | 2.100000  | -14.576397014 | 16.291080796  | -11.995277170 | 1 | 0 | 1 | # | st  |
| 2563 | 16 | 7 | 2.100000  | -11.988047014 | 11.836530796  | -11.995277170 | 1 | 0 | 1 | # | st  |
| 2564 | 16 | 7 | 2.100000  | -11.307077774 | 16.299379218  | -6.670701903  | 1 | 0 | 1 | # | st  |
| 2565 | 16 | 7 | 2.100000  | -13.895427774 | 11.844829218  | -6.670701903  | 1 | 0 | 1 | # | st  |
| 2566 | 16 | 7 | 2.100000  | -13.895452986 | 14.890769204  | -6.669722830  | 1 | 0 | 1 | # | st  |
| 2567 | 16 | 7 | 2.100000  | -14.576422226 | 10.427920782  | -11.994298097 | 1 | 0 | 1 | # | st  |
| 2568 | 16 | 1 | 1.575000  | -12.941544971 | 19.292861568  | -9.332229368  | 1 | 0 | 1 | # | ao  |
| 2569 | 16 | 1 | 1.575000  | -15.529894971 | 23.747411568  | -9.332229368  | 1 | 0 | 1 | # | ao  |
| 2570 | 16 | 1 | 1.575000  | -12.941955029 | 25.252638432  | -9.332770632  | 1 | 0 | 1 | # | ao  |
| 2571 | 16 | 1 | 1.575000  | -10.353605029 | 20.798088432  | -9.332770632  | 1 | 0 | 1 | # | ao  |
| 2572 | 16 | 2 | 0.425000  | -11.795449128 | 22.275467322  | -7.846384937  | 1 | 0 | 1 | # | ho  |
| 2573 | 16 | 2 | 0.425000  | -14.383799128 | 17.820917322  | -7.846384937  | 1 | 0 | 1 | # | ho  |
| 2574 | 16 | 2 | 0.425000  | -14.088050872 | 22.270032678  | -10.818615063 | 1 | 0 | 1 | # | ho  |
| 2575 | 16 | 2 | 0.425000  | -11.499700872 | 26.724582678  | -10.818615063 | 1 | 0 | 1 | # | ho  |
| 2576 | 16 | 3 | -1.050000 | -14.548785345 | 19.495701481  | -10.365922068 | 1 | 0 | 1 | # | ob  |
| 2577 | 16 | 3 | -1.050000 | -10.506582736 | 24.123296126  | -12.564346262 | 1 | 0 | 1 | # | ob  |
| 2578 | 16 | 3 | -1.050000 | -11.959855513 | 20.591849320  | -10.366131378 | 1 | 0 | 1 | # | ob  |
| 2579 | 16 | 3 | -1.050000 | -13.095260908 | 24.866910300  | -12.565579711 | 1 | 0 | 1 | # | ob  |
| 2580 | 16 | 3 | -1.050000 | -14.548205513 | 25.046399320  | -10.366131378 | 1 | 0 | 1 | # | ob  |
| 2581 | 16 | 3 | -1.050000 | -13.923644487 | 23.953650680  | -8.298868622  | 1 | 0 | 1 | # | ob  |
| 2582 | 16 | 3 | -1.050000 | -10.506910908 | 20.412360300  | -12.565579711 | 1 | 0 | 1 | # | ob  |
| 2583 | 16 | 3 | -1.050000 | -13.923064655 | 20.595248519  | -8.299077932  | 1 | 0 | 1 | # | ob  |
| 2584 | 16 | 3 | -1.050000 | -12.788567264 | 24.876753874  | -6.100653738  | 1 | 0 | 1 | # | ob  |
| 2585 | 16 | 3 | -1.050000 | -11.334714655 | 25.049798519  | -8.299077932  | 1 | 0 | 1 | # | ob  |
| 2586 | 16 | 3 | -1.050000 | -15.376917264 | 20.422203874  | -6.100653738  | 1 | 0 | 1 | # | ob  |
| 2587 | 16 | 3 | -1.050000 | -12.788239092 | 19.678589700  | -6.099420289  | 1 | 0 | 1 | # | ob  |
| 2588 | 16 | 6 | -0.950000 | -13.530842343 | 17.819140996  | -8.319917115  | 1 | 0 | 1 | # | oh  |
| 2589 | 16 | 3 | -1.050000 | -10.863018349 | 17.822176970  | -6.271017583  | 1 | 0 | 1 | # | ob  |
| 2590 | 16 | 6 | -0.950000 | -10.942492343 | 22.273690996  | -8.319917115  | 1 | 0 | 1 | # | oh  |
| 2591 | 16 | 3 | -1.050000 | -13.451368349 | 22.276726970  | -6.271017583  | 1 | 0 | 1 | # | ob  |
| 2592 | 16 | 6 | -0.950000 | -12.352657657 | 26.726359004  | -10.345082885 | 1 | 0 | 1 | # | oh  |
| 2593 | 16 | 3 | -1.050000 | -15.020481651 | 26.723323030  | -12.393982417 | 1 | 0 | 1 | # | ob  |
| 2594 | 16 | 6 | -0.950000 | -14.941007657 | 22.271809004  | -10.345082885 | 1 | 0 | 1 | # | oh  |
| 2595 | 16 | 3 | -1.050000 | -12.432131651 | 22.268773030  | -12.393982417 | 1 | 0 | 1 | # | ob  |
| 2596 | 16 | 3 | -1.050000 | -11.335294487 | 19.499100680  | -8.298868622  | 1 | 0 | 1 | # | ob  |
| 2597 | 16 | 3 | -1.050000 | -15.376589092 | 24.133139700  | -6.099420289  | 1 | 0 | 1 | # | ob  |
| 2598 | 16 | 3 | -1.050000 | -11.960435345 | 23.950251481  | -10.365922068 | 1 | 0 | 1 | # | ob  |
| 2599 | 16 | 3 | -1.050000 | -13.094932736 | 19.668746126  | -12.564346262 | 1 | 0 | 1 | # | ob  |
| 2600 | 16 | 7 | 2.100000  | -11.307102986 | 19.345319204  | -6.669722830  | 1 | 0 | 1 | # | st  |
| 2601 | 16 | 7 | 2.100000  | -11.988072226 | 23.791570782  | -11.994298097 | 1 | 0 | 1 | # | st  |
| 2602 | 16 | 7 | 2.100000  | -14.576397014 | 25.200180796  | -11.995277170 | 1 | 0 | 1 | # | st  |
| 2603 | 16 | 7 | 2.100000  | -11.988047014 | 20.745630796  | -11.995277170 | 1 | 0 | 1 | # | st  |
| 2604 | 16 | 7 | 2.100000  | -11.307077774 | 25.208479218  | -6.670701903  | 1 | 0 | 1 | # | st  |
| 2605 | 16 | 7 | 2.100000  | -13.895427774 | 20.753929218  | -6.670701903  | 1 | 0 | 1 | # | st  |
| 2606 | 16 | 7 | 2.100000  | -13.895452986 | 23.799869204  | -6.669722830  | 1 | 0 | 1 | # | st  |
| 2607 | 16 | 7 | 2.100000  | -14.576422226 | 19.337020782  | -11.994298097 | 1 | 0 | 1 | # | st  |
| 2608 | 16 | 1 | 1.575000  | -12.941544971 | -27.434438432 | -9.332229368  | 1 | 1 | 1 | # | ao  |
| 2609 | 16 | 1 | 1.575000  | -15.529894971 | -22.979888432 | -9.332229368  | 1 | 1 | 1 | # | ao  |
| 2610 | 16 | 1 | 1.575000  | -12.941955029 | -21.474661568 | -9.332770632  | 1 | 1 | 1 | # | ao  |
| 2611 | 16 | 1 | 1.575000  | -10.353605029 | -25.929211568 | -9.332770632  | 1 | 1 | 1 | # | ao  |
| 2612 | 16 | 2 | 0.425000  | -11.795449128 | -24.451832678 | -7.846384937  | 1 | 1 | 1 | # | ho  |
| 2613 | 16 | 2 | 0.425000  | -14.383799128 | 26.730017322  | -7.846384937  | 1 | 0 | 1 | # | ho  |
| 2614 | 16 | 2 | 0.425000  | -14.088050872 | -24.457267322 | -10.818615063 | 1 | 1 | 1 | # | ho  |
| 2615 | 16 | 2 | 0.425000  | -11.499700872 | -20.002717322 | -10.818615063 | 1 | 1 | 1 | # | ho  |
| 2616 | 16 | 3 | -1.050000 | -14.548785345 | -27.231598519 | -10.365922068 | 1 | 1 | 1 | # | ob  |
| 2617 | 16 | 3 | -1.050000 | -10.506582736 | -22.604003874 | -12.564346262 | 1 | 1 | 1 | # | ob  |
| 2618 | 16 | 3 | -1.050000 | -11.959855513 | -26.135450680 | -10.366131378 | 1 | 1 | 1 | # | ob  |
| 2619 | 16 | 3 | -1.050000 | -13.095260908 | -21.860389700 | -12.565579711 | 1 | 1 | 1 | # | ob  |
| 2620 | 16 | 3 | -1.050000 | -14.548205513 | -21.680900680 | -10.366131378 | 1 | 1 | 1 | # | ob  |
| 2621 | 16 | 3 | -1.050000 | -13.923644487 | -22.773649320 | -8.298868622  | 1 | 1 | 1 | # | ob  |
| 2622 | 16 | 3 | -1.050000 | -10.506910908 | -26.314939700 | -12.565579711 | 1 | 1 | 1 | # | ob  |
| 2623 | 16 | 3 | -1.050000 | -13.923064655 | -26.132051481 | -8.299077932  | 1 | 1 | 1 | # | ob  |
| 2624 | 16 | 3 | -1.050000 | -12.788567264 | -21.850546126 | -6.100653738  | 1 | 1 | 1 | # | ob  |
| 2625 | 16 | 3 | -1.050000 | -11.334714655 | -21.677501481 | -8.299077932  | 1 | 1 | 1 | # | ob  |
| 2626 | 16 | 3 | -1.050000 | -15.376917264 | -26.305096126 | -6.100653738  | 1 | 1 | 1 | # | ob  |
| 2627 | 16 | 3 | -1.050000 | -12.788239092 | -27.048710300 | -6.099420289  | 1 | 1 | 1 | # | ob  |
| 2628 | 16 | 6 | -0.950000 | -13.530842343 | 26.728240996  | -8.319917115  | 1 | 0 | 1 | # | oh  |
| 2629 | 16 | 3 | -1.050000 | -10.863018349 | 26.731276970  | -6.271017583  | 1 | 0 | 1 | # | ob  |
| 2630 | 16 | 6 | -0.950000 | -10.942492343 | -24.453609004 | -8.319917115  | 1 | 1 | 1 | # | oh  |
| 2631 | 16 | 3 | -1.050000 | -13.451368349 | -24.450573030 | -6.271017583  | 1 | 1 | 1 | # | ob  |
| 2632 | 16 | 4 | -0.950000 | -12.352657657 | -20.000940996 | -10.345082885 | 1 | 1 | 1 | # | oho |
| 2633 | 16 | 5 | -0.950000 | -15.020481651 | -20.003976970 | -12.393982417 | 1 | 1 | 1 | # | oht |

|      |    |   |           |               |               |               |   |   |   |   |     |
|------|----|---|-----------|---------------|---------------|---------------|---|---|---|---|-----|
| 2634 | 16 | 6 | -0.950000 | -14.941007657 | -24.455490996 | -10.345082885 | 1 | 1 | 1 | # | oh  |
| 2635 | 16 | 3 | -1.050000 | -12.432131651 | -24.458526970 | -12.393982417 | 1 | 1 | 1 | # | ob  |
| 2636 | 16 | 3 | -1.050000 | -11.335294487 | -27.228199320 | -8.298868622  | 1 | 1 | 1 | # | ob  |
| 2637 | 16 | 3 | -1.050000 | -15.376589092 | -22.594160300 | -6.099420289  | 1 | 1 | 1 | # | ob  |
| 2638 | 16 | 3 | -1.050000 | -11.960435345 | -22.777048519 | -10.365922068 | 1 | 1 | 1 | # | ob  |
| 2639 | 16 | 3 | -1.050000 | -13.094932736 | -27.058553874 | -12.564346262 | 1 | 1 | 1 | # | ob  |
| 2640 | 16 | 7 | 2.100000  | -11.307102986 | -27.381980796 | -6.669722830  | 1 | 1 | 1 | # | st  |
| 2641 | 16 | 7 | 2.100000  | -11.988072226 | -22.935729218 | -11.994298097 | 1 | 1 | 1 | # | st  |
| 2642 | 16 | 7 | 2.100000  | -14.576397014 | -21.527119204 | -11.995277170 | 1 | 1 | 1 | # | st  |
| 2643 | 16 | 7 | 2.100000  | -11.988047014 | -25.981669204 | -11.995277170 | 1 | 1 | 1 | # | st  |
| 2644 | 16 | 7 | 2.100000  | -11.307077774 | -21.518820782 | -6.670701903  | 1 | 1 | 1 | # | st  |
| 2645 | 16 | 7 | 2.100000  | -13.895427774 | -25.973370782 | -6.670701903  | 1 | 1 | 1 | # | st  |
| 2646 | 16 | 7 | 2.100000  | -13.895452986 | -22.927430796 | -6.669722830  | 1 | 1 | 1 | # | st  |
| 2647 | 16 | 7 | 2.100000  | -14.576422226 | -27.390279218 | -11.994298097 | 1 | 1 | 1 | # | st  |
| 2648 | 16 | 5 | -0.950000 | -10.792633573 | -19.680858114 | 2.588720950   | 1 | 1 | 1 | # | oht |
| 2649 | 16 | 5 | -0.950000 | -15.225161797 | -0.272172439  | -2.801727113  | 1 | 0 | 1 | # | oht |
| 2650 | 16 | 2 | 0.425000  | 15.486672253  | -1.308055357  | -2.995860493  | 0 | 0 | 1 | # | ho  |
| 2651 | 16 | 2 | 0.425000  | -10.530111381 | -1.054326608  | 3.097070537   | 1 | 0 | 1 | # | ho  |
| 2652 | 16 | 2 | 0.425000  | -10.666251036 | -18.596754758 | 2.386613544   | 1 | 1 | 1 | # | ho  |
| 2653 | 16 | 2 | 0.425000  | -15.417051085 | -19.012312375 | -3.3623863051 | 1 | 1 | 1 | # | ho  |
| 2654 | 17 | 1 | 1.575000  | -7.764844971  | 1.474661568   | -9.332229368  | 1 | 0 | 1 | # | ao  |
| 2655 | 17 | 1 | 1.575000  | -10.353194971 | 5.929211568   | -9.332229368  | 1 | 0 | 1 | # | ao  |
| 2656 | 17 | 1 | 1.575000  | -7.765255029  | 7.434438432   | -9.332770632  | 1 | 0 | 1 | # | ao  |
| 2657 | 17 | 1 | 1.575000  | -5.176905029  | 2.979888432   | -9.332770632  | 1 | 0 | 1 | # | ao  |
| 2658 | 17 | 2 | 0.425000  | -6.618749128  | 4.457267322   | -7.846384937  | 1 | 0 | 1 | # | ho  |
| 2659 | 17 | 2 | 0.425000  | -9.207099128  | 0.002717322   | -7.846384937  | 1 | 0 | 1 | # | ho  |
| 2660 | 17 | 2 | 0.425000  | -8.911350872  | 4.451832678   | -10.818615063 | 1 | 0 | 1 | # | ho  |
| 2661 | 17 | 2 | 0.425000  | -6.323000872  | 8.906382678   | -10.818615063 | 1 | 0 | 1 | # | ho  |
| 2662 | 17 | 3 | -1.050000 | -9.372085345  | 1.677501481   | -10.365922068 | 1 | 0 | 1 | # | ob  |
| 2663 | 17 | 3 | -1.050000 | -5.329882736  | 6.305096126   | -12.564346262 | 1 | 0 | 1 | # | ob  |
| 2664 | 17 | 3 | -1.050000 | -6.783155513  | 2.773649320   | -10.366131378 | 1 | 0 | 1 | # | ob  |
| 2665 | 17 | 3 | -1.050000 | -7.918560908  | 7.048710300   | -12.565579711 | 1 | 0 | 1 | # | ob  |
| 2666 | 17 | 3 | -1.050000 | -9.371505513  | 7.228199320   | -10.366131378 | 1 | 0 | 1 | # | ob  |
| 2667 | 17 | 3 | -1.050000 | -8.746944487  | 6.135450680   | -8.298868622  | 1 | 0 | 1 | # | ob  |
| 2668 | 17 | 3 | -1.050000 | -5.330210908  | 2.594160300   | -12.565579711 | 1 | 0 | 1 | # | ob  |
| 2669 | 17 | 3 | -1.050000 | -8.746364655  | 2.777048519   | -8.299077932  | 1 | 0 | 1 | # | ob  |
| 2670 | 17 | 3 | -1.050000 | -7.611867264  | 7.058553874   | -6.100653738  | 1 | 0 | 1 | # | ob  |
| 2671 | 17 | 3 | -1.050000 | -6.158014655  | 7.231598519   | -8.299077932  | 1 | 0 | 1 | # | ob  |
| 2672 | 17 | 3 | -1.050000 | -10.200217264 | 2.604003874   | -6.100653738  | 1 | 0 | 1 | # | ob  |
| 2673 | 17 | 3 | -1.050000 | -7.611539092  | 1.860389700   | -6.099420289  | 1 | 0 | 1 | # | ob  |
| 2674 | 17 | 4 | -0.950000 | -8.354142343  | 0.000940996   | -8.319917115  | 1 | 0 | 1 | # | oho |
| 2675 | 17 | 5 | -0.950000 | -5.686318349  | 0.003976970   | -6.271017583  | 1 | 0 | 1 | # | oht |
| 2676 | 17 | 6 | -0.950000 | -5.765792343  | 4.455490996   | -8.319917115  | 1 | 0 | 1 | # | oh  |
| 2677 | 17 | 3 | -1.050000 | -8.274668349  | 4.458526970   | -6.271017583  | 1 | 0 | 1 | # | ob  |
| 2678 | 17 | 6 | -0.950000 | -7.175957657  | 8.908159004   | -10.345082885 | 1 | 0 | 1 | # | oh  |
| 2679 | 17 | 3 | -1.050000 | -9.843781651  | 8.905123030   | -12.393982417 | 1 | 0 | 1 | # | ob  |
| 2680 | 17 | 6 | -0.950000 | -9.764307657  | 4.453609004   | -10.345082885 | 1 | 0 | 1 | # | oh  |
| 2681 | 17 | 3 | -1.050000 | -7.255431651  | 4.450573030   | -12.393982417 | 1 | 0 | 1 | # | ob  |
| 2682 | 17 | 3 | -1.050000 | -6.158594487  | 1.680900680   | -8.298868622  | 1 | 0 | 1 | # | ob  |
| 2683 | 17 | 3 | -1.050000 | -10.199889092 | 6.314939700   | -6.099420289  | 1 | 0 | 1 | # | ob  |
| 2684 | 17 | 3 | -1.050000 | -6.783735345  | 6.132051481   | -10.365922068 | 1 | 0 | 1 | # | ob  |
| 2685 | 17 | 3 | -1.050000 | -7.918232736  | 1.850546126   | -12.564346262 | 1 | 0 | 1 | # | ob  |
| 2686 | 17 | 7 | 2.100000  | -6.130402986  | 1.527119204   | -6.669722830  | 1 | 0 | 1 | # | st  |
| 2687 | 17 | 7 | 2.100000  | -6.811372226  | 5.973370782   | -11.994298097 | 1 | 0 | 1 | # | st  |
| 2688 | 17 | 7 | 2.100000  | -9.399697014  | 7.381980796   | -11.995277170 | 1 | 0 | 1 | # | st  |
| 2689 | 17 | 7 | 2.100000  | -6.811347014  | 2.927430796   | -11.995277170 | 1 | 0 | 1 | # | st  |
| 2690 | 17 | 7 | 2.100000  | -6.130377774  | 7.390279218   | -6.670701903  | 1 | 0 | 1 | # | st  |
| 2691 | 17 | 7 | 2.100000  | -8.718727774  | 2.935729218   | -6.670701903  | 1 | 0 | 1 | # | st  |
| 2692 | 17 | 7 | 2.100000  | -8.718752986  | 5.981669204   | -6.669722830  | 1 | 0 | 1 | # | st  |
| 2693 | 17 | 7 | 2.100000  | -9.399722226  | 1.518820782   | -11.994298097 | 1 | 0 | 1 | # | st  |
| 2694 | 17 | 1 | 1.575000  | -7.764844971  | 10.383761568  | -9.332229368  | 1 | 0 | 1 | # | ao  |
| 2695 | 17 | 1 | 1.575000  | -10.353194971 | 14.838311568  | -9.332229368  | 1 | 0 | 1 | # | ao  |
| 2696 | 17 | 1 | 1.575000  | -7.765255029  | 16.343538432  | -9.332770632  | 1 | 0 | 1 | # | ao  |
| 2697 | 17 | 1 | 1.575000  | -5.176905029  | 11.888988432  | -9.332770632  | 1 | 0 | 1 | # | ao  |
| 2698 | 17 | 2 | 0.425000  | -6.618749128  | 13.366367322  | -7.846384937  | 1 | 0 | 1 | # | ho  |
| 2699 | 17 | 2 | 0.425000  | -9.207099128  | 8.911817322   | -7.846384937  | 1 | 0 | 1 | # | ho  |
| 2700 | 17 | 2 | 0.425000  | -8.911350872  | 13.360932678  | -10.818615063 | 1 | 0 | 1 | # | ho  |
| 2701 | 17 | 2 | 0.425000  | -6.323000872  | 17.815482678  | -10.818615063 | 1 | 0 | 1 | # | ho  |
| 2702 | 17 | 3 | -1.050000 | -9.372085345  | 10.586601481  | -10.365922068 | 1 | 0 | 1 | # | ob  |
| 2703 | 17 | 3 | -1.050000 | -5.329882736  | 15.214196126  | -12.564346262 | 1 | 0 | 1 | # | ob  |
| 2704 | 17 | 3 | -1.050000 | -6.783155513  | 11.682749320  | -10.366131378 | 1 | 0 | 1 | # | ob  |
| 2705 | 17 | 3 | -1.050000 | -7.918560908  | 15.957810300  | -12.565579711 | 1 | 0 | 1 | # | ob  |
| 2706 | 17 | 3 | -1.050000 | -9.371505513  | 16.137299320  | -10.366131378 | 1 | 0 | 1 | # | ob  |
| 2707 | 17 | 3 | -1.050000 | -8.746944487  | 15.044550680  | -8.298868622  | 1 | 0 | 1 | # | ob  |
| 2708 | 17 | 3 | -1.050000 | -5.330210908  | 11.503260300  | -12.565579711 | 1 | 0 | 1 | # | ob  |
| 2709 | 17 | 3 | -1.050000 | -8.746364655  | 11.686148519  | -8.299077932  | 1 | 0 | 1 | # | ob  |
| 2710 | 17 | 3 | -1.050000 | -7.611867264  | 15.967653874  | -6.100653738  | 1 | 0 | 1 | # | ob  |
| 2711 | 17 | 3 | -1.050000 | -6.158014655  | 16.140698519  | -8.299077932  | 1 | 0 | 1 | # | ob  |
| 2712 | 17 | 3 | -1.050000 | -10.200217264 | 11.513103874  | -6.100653738  | 1 | 0 | 1 | # | ob  |
| 2713 | 17 | 3 | -1.050000 | -7.611539092  | 10.769489700  | -6.099420289  | 1 | 0 | 1 | # | ob  |
| 2714 | 17 | 6 | -0.950000 | -8.354142343  | 8.910040996   | -8.319917115  | 1 | 0 | 1 | # | oho |
| 2715 | 17 | 3 | -1.050000 | -5.686318349  | 8.913076970   | -6.271017583  | 1 | 0 | 1 | # | ob  |
| 2716 | 17 | 6 | -0.950000 | -5.765792343  | 13.364590996  | -8.319917115  | 1 | 0 | 1 | # | oh  |
| 2717 | 17 | 3 | -1.050000 | -8.274668349  | 13.367626970  | -6.271017583  | 1 | 0 | 1 | # | ob  |
| 2718 | 17 | 6 | -0.950000 | -7.175957657  | 17.817259004  | -10.345082885 | 1 | 0 | 1 | # | oh  |
| 2719 | 17 | 3 | -1.050000 | -9.843781651  | 17.814223030  | -12.393982417 | 1 | 0 | 1 | # | ob  |
| 2720 | 17 | 6 | -0.950000 | -9.764307657  | 13.362709004  | -10.345082885 | 1 | 0 | 1 | # | oh  |
| 2721 | 17 | 3 | -1.050000 | -7.255431651  | 13.359673030  | -12.393982417 | 1 | 0 | 1 | # | ob  |
| 2722 | 17 | 3 | -1.050000 | -6.158594487  | 10.590000680  | -8.298868622  | 1 | 0 | 1 | # | ob  |
| 2723 | 17 | 3 | -1.050000 | -10.199889092 | 15.224039700  | -6.099420289  | 1 | 0 | 1 | # | ob  |
| 2724 | 17 | 3 | -1.050000 | -6.783735345  | 15.041151481  | -10.365922068 | 1 | 0 | 1 | # | ob  |
| 2725 | 17 | 3 | -1.050000 | -7.918232736  | 10.759646126  | -12.564346262 | 1 | 0 | 1 | # | ob  |
| 2726 | 17 | 7 | 2.100000  | -6.130402986  | 10.436219204  | -6.669722830  | 1 | 0 | 1 | # | st  |

|      |    |   |           |               |               |               |   |   |   |   |     |
|------|----|---|-----------|---------------|---------------|---------------|---|---|---|---|-----|
| 2727 | 17 | 7 | 2.100000  | -6.811372226  | 14.882470782  | -11.994298097 | 1 | 0 | 1 | # | st  |
| 2728 | 17 | 7 | 2.100000  | -9.399697014  | 16.291080796  | -11.995277170 | 1 | 0 | 1 | # | st  |
| 2729 | 17 | 7 | 2.100000  | -6.811347014  | 11.836530796  | -11.995277170 | 1 | 0 | 1 | # | st  |
| 2730 | 17 | 7 | 2.100000  | -6.130377774  | 16.299379218  | -6.670701903  | 1 | 0 | 1 | # | st  |
| 2731 | 17 | 7 | 2.100000  | -8.718727774  | 11.844829218  | -6.670701903  | 1 | 0 | 1 | # | st  |
| 2732 | 17 | 7 | 2.100000  | -8.718752986  | 14.890769204  | -6.669722830  | 1 | 0 | 1 | # | st  |
| 2733 | 17 | 7 | 2.100000  | -9.399722226  | 10.427920782  | -11.994298097 | 1 | 0 | 1 | # | st  |
| 2734 | 17 | 1 | 1.575000  | -7.764844971  | 19.292861568  | -9.332229368  | 1 | 0 | 1 | # | ao  |
| 2735 | 17 | 1 | 1.575000  | -10.353194971 | 23.747411568  | -9.332229368  | 1 | 0 | 1 | # | ao  |
| 2736 | 17 | 1 | 1.575000  | -7.765255029  | 25.252638432  | -9.332770632  | 1 | 0 | 1 | # | ao  |
| 2737 | 17 | 1 | 1.575000  | -5.176905029  | 20.798088432  | -9.332770632  | 1 | 0 | 1 | # | ao  |
| 2738 | 17 | 2 | 0.425000  | -6.618749128  | 22.275467322  | -7.846384937  | 1 | 0 | 1 | # | ho  |
| 2739 | 17 | 2 | 0.425000  | -9.207099128  | 17.820917322  | -7.846384937  | 1 | 0 | 1 | # | ho  |
| 2740 | 17 | 2 | 0.425000  | -8.911350872  | 22.270032678  | -10.818615063 | 1 | 0 | 1 | # | ho  |
| 2741 | 17 | 2 | 0.425000  | -6.323000872  | 26.724582678  | -10.818615063 | 1 | 0 | 1 | # | ho  |
| 2742 | 17 | 3 | -1.050000 | -9.372085345  | 19.495701481  | -10.365922068 | 1 | 0 | 1 | # | ob  |
| 2743 | 17 | 3 | -1.050000 | -5.329882736  | 24.123296126  | -12.564346262 | 1 | 0 | 1 | # | ob  |
| 2744 | 17 | 3 | -1.050000 | -6.783155513  | 20.591849320  | -10.366131378 | 1 | 0 | 1 | # | ob  |
| 2745 | 17 | 3 | -1.050000 | -7.918560908  | 24.866910300  | -12.565579711 | 1 | 0 | 1 | # | ob  |
| 2746 | 17 | 3 | -1.050000 | -9.371505513  | 25.046399320  | -10.366131378 | 1 | 0 | 1 | # | ob  |
| 2747 | 17 | 3 | -1.050000 | -8.746944487  | 23.953650680  | -8.298868622  | 1 | 0 | 1 | # | ob  |
| 2748 | 17 | 3 | -1.050000 | -5.330210908  | 20.412360300  | -12.565579711 | 1 | 0 | 1 | # | ob  |
| 2749 | 17 | 3 | -1.050000 | -8.746364655  | 20.595248519  | -8.299077932  | 1 | 0 | 1 | # | ob  |
| 2750 | 17 | 3 | -1.050000 | -7.611867264  | 24.876753874  | -6.100653738  | 1 | 0 | 1 | # | ob  |
| 2751 | 17 | 3 | -1.050000 | -6.158014655  | 25.049798519  | -8.299077932  | 1 | 0 | 1 | # | ob  |
| 2752 | 17 | 3 | -1.050000 | -10.200217264 | 20.422203874  | -6.100653738  | 1 | 0 | 1 | # | ob  |
| 2753 | 17 | 3 | -1.050000 | -7.611539092  | 19.678589700  | -6.099420289  | 1 | 0 | 1 | # | ob  |
| 2754 | 17 | 6 | -0.950000 | -8.354142343  | 17.819140996  | -8.319917115  | 1 | 0 | 1 | # | oh  |
| 2755 | 17 | 3 | -1.050000 | -5.686318349  | 17.822176970  | -6.271017583  | 1 | 0 | 1 | # | ob  |
| 2756 | 17 | 6 | -0.950000 | -5.765792343  | 22.273690996  | -8.319917115  | 1 | 0 | 1 | # | oh  |
| 2757 | 17 | 3 | -1.050000 | -8.274668349  | 22.276726970  | -6.271017583  | 1 | 0 | 1 | # | ob  |
| 2758 | 17 | 6 | -0.950000 | -7.175957657  | 26.726359004  | -10.345082885 | 1 | 0 | 1 | # | oh  |
| 2759 | 17 | 3 | -1.050000 | -9.843781651  | 26.723323030  | -12.393982417 | 1 | 0 | 1 | # | ob  |
| 2760 | 17 | 6 | -0.950000 | -9.764307657  | 22.271809004  | -10.345082885 | 1 | 0 | 1 | # | oh  |
| 2761 | 17 | 3 | -1.050000 | -7.255431651  | 22.268773030  | -12.393982417 | 1 | 0 | 1 | # | ob  |
| 2762 | 17 | 3 | -1.050000 | -6.158594487  | 19.499100680  | -8.298868622  | 1 | 0 | 1 | # | ob  |
| 2763 | 17 | 3 | -1.050000 | -10.199889092 | 24.133139700  | -6.099420289  | 1 | 0 | 1 | # | ob  |
| 2764 | 17 | 3 | -1.050000 | -6.783735345  | 23.950251481  | -10.365922068 | 1 | 0 | 1 | # | ob  |
| 2765 | 17 | 3 | -1.050000 | -7.918232736  | 19.668746126  | -12.564346262 | 1 | 0 | 1 | # | ob  |
| 2766 | 17 | 7 | 2.100000  | -6.130402986  | 19.345319204  | -6.669722830  | 1 | 0 | 1 | # | st  |
| 2767 | 17 | 7 | 2.100000  | -6.811372226  | 23.791570782  | -11.994298097 | 1 | 0 | 1 | # | st  |
| 2768 | 17 | 7 | 2.100000  | -9.399697014  | 25.200180796  | -11.995277170 | 1 | 0 | 1 | # | st  |
| 2769 | 17 | 7 | 2.100000  | -6.811347014  | 20.745630796  | -11.995277170 | 1 | 0 | 1 | # | st  |
| 2770 | 17 | 7 | 2.100000  | -6.130377774  | 25.208479218  | -6.670701903  | 1 | 0 | 1 | # | st  |
| 2771 | 17 | 7 | 2.100000  | -8.718727774  | 20.753929218  | -6.670701903  | 1 | 0 | 1 | # | st  |
| 2772 | 17 | 7 | 2.100000  | -8.718752986  | 23.799869204  | -6.669722830  | 1 | 0 | 1 | # | st  |
| 2773 | 17 | 7 | 2.100000  | -9.399722226  | 19.337020782  | -11.994298097 | 1 | 0 | 1 | # | st  |
| 2774 | 17 | 1 | 1.575000  | -7.764844971  | 27.434438432  | -9.332229368  | 1 | 1 | 1 | # | ao  |
| 2775 | 17 | 1 | 1.575000  | -10.353194971 | 22.979888432  | -9.332229368  | 1 | 1 | 1 | # | ao  |
| 2776 | 17 | 1 | 1.575000  | -7.765255029  | 21.474661568  | -9.332770632  | 1 | 1 | 1 | # | ao  |
| 2777 | 17 | 1 | 1.575000  | -5.176905029  | 25.929211568  | -9.332770632  | 1 | 1 | 1 | # | ao  |
| 2778 | 17 | 2 | 0.425000  | -6.618749128  | 24.451832678  | -7.846384937  | 1 | 1 | 1 | # | ho  |
| 2779 | 17 | 2 | 0.425000  | -9.207099128  | 26.730017322  | -7.846384937  | 1 | 1 | 1 | # | ho  |
| 2780 | 17 | 2 | 0.425000  | -8.911350872  | 24.457267322  | -10.818615063 | 1 | 1 | 1 | # | ho  |
| 2781 | 17 | 2 | 0.425000  | -6.323000872  | 20.002717322  | -10.818615063 | 1 | 1 | 1 | # | ho  |
| 2782 | 17 | 3 | -1.050000 | -9.372085345  | 27.231598519  | -10.365922068 | 1 | 1 | 1 | # | ob  |
| 2783 | 17 | 3 | -1.050000 | -5.329882736  | 22.604003874  | -12.564346262 | 1 | 1 | 1 | # | ob  |
| 2784 | 17 | 3 | -1.050000 | -6.783155513  | 26.135450680  | -10.366131378 | 1 | 1 | 1 | # | ob  |
| 2785 | 17 | 3 | -1.050000 | -7.918560908  | 21.860389700  | -12.565579711 | 1 | 1 | 1 | # | ob  |
| 2786 | 17 | 3 | -1.050000 | -9.371505513  | 21.680900680  | -10.366131378 | 1 | 1 | 1 | # | ob  |
| 2787 | 17 | 3 | -1.050000 | -8.746944487  | 22.773649320  | -8.298868622  | 1 | 1 | 1 | # | ob  |
| 2788 | 17 | 3 | -1.050000 | -5.330210908  | 26.314939700  | -12.565579711 | 1 | 1 | 1 | # | ob  |
| 2789 | 17 | 3 | -1.050000 | -8.746364655  | 26.132051481  | -8.299077932  | 1 | 1 | 1 | # | ob  |
| 2790 | 17 | 3 | -1.050000 | -7.611867264  | 21.850546126  | -6.100653738  | 1 | 1 | 1 | # | ob  |
| 2791 | 17 | 3 | -1.050000 | -6.158014655  | 21.677501481  | -8.299077932  | 1 | 1 | 1 | # | ob  |
| 2792 | 17 | 3 | -1.050000 | -10.200217264 | 26.305096126  | -6.100653738  | 1 | 1 | 1 | # | ob  |
| 2793 | 17 | 3 | -1.050000 | -7.611539092  | 27.048710300  | -6.099420289  | 1 | 1 | 1 | # | ob  |
| 2794 | 17 | 6 | -0.950000 | -8.354142343  | 26.728240996  | -8.319917115  | 1 | 1 | 1 | # | oh  |
| 2795 | 17 | 3 | -1.050000 | -5.686318349  | 26.731276970  | -6.271017583  | 1 | 1 | 1 | # | ob  |
| 2796 | 17 | 6 | -0.950000 | -5.765792343  | 24.453609004  | -8.319917115  | 1 | 1 | 1 | # | oh  |
| 2797 | 17 | 3 | -1.050000 | -8.274668349  | 24.450573030  | -6.271017583  | 1 | 1 | 1 | # | ob  |
| 2798 | 17 | 4 | -0.950000 | -7.175957657  | 20.000940996  | -10.345082885 | 1 | 1 | 1 | # | oh  |
| 2799 | 17 | 5 | -0.950000 | -9.843781651  | 20.003976970  | -12.393982417 | 1 | 1 | 1 | # | oh  |
| 2800 | 17 | 6 | -0.950000 | -9.764307657  | 24.455490996  | -10.345082885 | 1 | 1 | 1 | # | oh  |
| 2801 | 17 | 3 | -1.050000 | -7.255431651  | 24.458526970  | -12.393982417 | 1 | 1 | 1 | # | ob  |
| 2802 | 17 | 3 | -1.050000 | -6.158594487  | 27.228199320  | -8.298868622  | 1 | 1 | 1 | # | ob  |
| 2803 | 17 | 3 | -1.050000 | -10.199889092 | 22.594160300  | -6.099420289  | 1 | 1 | 1 | # | ob  |
| 2804 | 17 | 3 | -1.050000 | -6.783735345  | 22.777048519  | -10.365922068 | 1 | 1 | 1 | # | ob  |
| 2805 | 17 | 3 | -1.050000 | -7.918232736  | 27.058553874  | -12.564346262 | 1 | 1 | 1 | # | ob  |
| 2806 | 17 | 7 | 2.100000  | -6.130402986  | 27.381980796  | -6.669722830  | 1 | 1 | 1 | # | st  |
| 2807 | 17 | 7 | 2.100000  | -6.811372226  | 22.935729218  | -11.994298097 | 1 | 1 | 1 | # | st  |
| 2808 | 17 | 7 | 2.100000  | -9.399697014  | 21.527119204  | -11.995277170 | 1 | 1 | 1 | # | st  |
| 2809 | 17 | 7 | 2.100000  | -6.811347014  | 25.981669204  | -11.995277170 | 1 | 1 | 1 | # | st  |
| 2810 | 17 | 7 | 2.100000  | -6.130377774  | 21.518820782  | -6.670701903  | 1 | 1 | 1 | # | st  |
| 2811 | 17 | 7 | 2.100000  | -8.718727774  | 25.973370782  | -6.670701903  | 1 | 1 | 1 | # | st  |
| 2812 | 17 | 7 | 2.100000  | -8.718752986  | 22.927430796  | -6.669722830  | 1 | 1 | 1 | # | st  |
| 2813 | 17 | 7 | 2.100000  | -9.399722226  | 27.390279218  | -11.994298097 | 1 | 1 | 1 | # | st  |
| 2814 | 17 | 5 | -0.950000 | -5.615933573  | 19.680858114  | 2.588720950   | 1 | 1 | 1 | # | oht |
| 2815 | 17 | 5 | -0.950000 | -10.048461797 | -0.272172439  | -2.801727113  | 1 | 0 | 1 | # | oht |
| 2816 | 17 | 2 | 0.425000  | -10.396827747 | -1.308055357  | -2.995860493  | 1 | 0 | 1 | # | ho  |
| 2817 | 17 | 2 | 0.425000  | -5.353411381  | -1.054326608  | 3.097070537   | 1 | 0 | 1 | # | ho  |
| 2818 | 17 | 2 | 0.425000  | -5.489551036  | -18.596754758 | 2.386613544   | 1 | 1 | 1 | # | ho  |
| 2819 | 17 | 2 | 0.425000  | -10.240351085 | -19.012312375 | -3.363863051  | 1 | 1 | 1 | # | ho  |

|      |    |   |           |              |              |               |   |   |   |   |     |
|------|----|---|-----------|--------------|--------------|---------------|---|---|---|---|-----|
| 2820 | 18 | 1 | 1.575000  | -2.588144971 | 1.474661568  | -9.332229368  | 1 | 0 | 1 | # | ao  |
| 2821 | 18 | 1 | 1.575000  | -5.176494971 | 5.929211568  | -9.332229368  | 1 | 0 | 1 | # | ao  |
| 2822 | 18 | 1 | 1.575000  | -2.588555029 | 7.434438432  | -9.332770632  | 1 | 0 | 1 | # | ao  |
| 2823 | 18 | 1 | 1.575000  | -0.000205029 | 2.979888432  | -9.332770632  | 1 | 0 | 1 | # | ao  |
| 2824 | 18 | 2 | 0.425000  | -1.442049128 | 4.457267322  | -7.846384937  | 1 | 0 | 1 | # | ho  |
| 2825 | 18 | 2 | 0.425000  | -4.030399128 | 0.002717322  | -7.846384937  | 1 | 0 | 1 | # | ho  |
| 2826 | 18 | 2 | 0.425000  | -3.734650872 | 4.451832678  | -10.818615063 | 1 | 0 | 1 | # | ho  |
| 2827 | 18 | 2 | 0.425000  | -1.146300872 | 8.906382678  | -10.818615063 | 1 | 0 | 1 | # | ho  |
| 2828 | 18 | 3 | -1.050000 | -4.195385345 | 1.677501481  | -10.365922068 | 1 | 0 | 1 | # | ob  |
| 2829 | 18 | 3 | -1.050000 | -0.153182736 | 6.305096126  | -12.564346262 | 1 | 0 | 1 | # | ob  |
| 2830 | 18 | 3 | -1.050000 | -1.606455513 | 2.773649320  | -10.366131378 | 1 | 0 | 1 | # | ob  |
| 2831 | 18 | 3 | -1.050000 | -2.741860908 | 7.048710300  | -12.565579711 | 1 | 0 | 1 | # | ob  |
| 2832 | 18 | 3 | -1.050000 | -4.194805513 | 7.228199320  | -10.366131378 | 1 | 0 | 1 | # | ob  |
| 2833 | 18 | 3 | -1.050000 | -3.570244487 | 6.135450680  | -8.298868622  | 1 | 0 | 1 | # | ob  |
| 2834 | 18 | 3 | -1.050000 | -0.153510908 | 2.594160300  | -12.565579711 | 1 | 0 | 1 | # | ob  |
| 2835 | 18 | 3 | -1.050000 | -3.569664655 | 2.777048519  | -8.299077932  | 1 | 0 | 1 | # | ob  |
| 2836 | 18 | 3 | -1.050000 | -2.435167264 | 7.058553874  | -6.100653738  | 1 | 0 | 1 | # | ob  |
| 2837 | 18 | 3 | -1.050000 | -0.981314655 | 7.231598519  | -8.299077932  | 1 | 0 | 1 | # | ob  |
| 2838 | 18 | 3 | -1.050000 | -5.023517264 | 2.604003874  | -6.100653738  | 1 | 0 | 1 | # | ob  |
| 2839 | 18 | 3 | -1.050000 | -2.434839092 | 1.860389700  | -6.099420289  | 1 | 0 | 1 | # | ob  |
| 2840 | 18 | 4 | -0.950000 | -3.177442343 | 0.000940996  | -8.319917115  | 1 | 0 | 1 | # | oho |
| 2841 | 18 | 5 | -0.950000 | -0.509618349 | 0.003976970  | -6.271017583  | 1 | 0 | 1 | # | oht |
| 2842 | 18 | 6 | -0.950000 | -0.589092343 | 4.455490996  | -8.319917115  | 1 | 0 | 1 | # | oh  |
| 2843 | 18 | 3 | -1.050000 | -3.097968349 | 4.458526970  | -6.271017583  | 1 | 0 | 1 | # | ob  |
| 2844 | 18 | 6 | -0.950000 | -1.999257657 | 8.908159004  | -10.345082885 | 1 | 0 | 1 | # | oh  |
| 2845 | 18 | 3 | -1.050000 | -4.667081651 | 8.905123030  | -12.393982417 | 1 | 0 | 1 | # | ob  |
| 2846 | 18 | 6 | -0.950000 | -4.587607657 | 4.453609004  | -10.345082885 | 1 | 0 | 1 | # | oh  |
| 2847 | 18 | 3 | -1.050000 | -2.078731651 | 4.450573030  | -12.393982417 | 1 | 0 | 1 | # | ob  |
| 2848 | 18 | 3 | -1.050000 | -0.981894487 | 1.680900680  | -8.298868622  | 1 | 0 | 1 | # | ob  |
| 2849 | 18 | 3 | -1.050000 | -5.023189092 | 6.314939700  | -6.099420289  | 1 | 0 | 1 | # | ob  |
| 2850 | 18 | 3 | -1.050000 | -1.607035345 | 6.132051481  | -10.365922068 | 1 | 0 | 1 | # | ob  |
| 2851 | 18 | 3 | -1.050000 | -2.741532736 | 1.850546126  | -12.564346262 | 1 | 0 | 1 | # | ob  |
| 2852 | 18 | 7 | 2.100000  | -0.953702986 | 1.527119204  | -6.669722830  | 1 | 0 | 1 | # | st  |
| 2853 | 18 | 7 | 2.100000  | -1.634672226 | 5.973370782  | -11.994298097 | 1 | 0 | 1 | # | st  |
| 2854 | 18 | 7 | 2.100000  | -4.222997014 | 7.381980796  | -11.995277170 | 1 | 0 | 1 | # | st  |
| 2855 | 18 | 7 | 2.100000  | -1.634647014 | 2.927430796  | -11.995277170 | 1 | 0 | 1 | # | st  |
| 2856 | 18 | 7 | 2.100000  | -0.953677774 | 7.390279218  | -6.670701903  | 1 | 0 | 1 | # | st  |
| 2857 | 18 | 7 | 2.100000  | -3.542027774 | 2.935729218  | -6.670701903  | 1 | 0 | 1 | # | st  |
| 2858 | 18 | 7 | 2.100000  | -3.542052986 | 5.981669204  | -6.669722830  | 1 | 0 | 1 | # | st  |
| 2859 | 18 | 7 | 2.100000  | -4.223022226 | 1.518820782  | -11.994298097 | 1 | 0 | 1 | # | st  |
| 2860 | 18 | 1 | 1.575000  | -2.588144971 | 10.383761568 | -9.332229368  | 1 | 0 | 1 | # | ao  |
| 2861 | 18 | 1 | 1.575000  | -5.176494971 | 14.838311568 | -9.332229368  | 1 | 0 | 1 | # | ao  |
| 2862 | 18 | 1 | 1.575000  | -2.588555029 | 16.343538432 | -9.332770632  | 1 | 0 | 1 | # | ao  |
| 2863 | 18 | 1 | 1.575000  | -0.000205029 | 11.888988432 | -9.332770632  | 1 | 0 | 1 | # | ao  |
| 2864 | 18 | 2 | 0.425000  | -1.442049128 | 13.366367322 | -7.846384937  | 1 | 0 | 1 | # | ho  |
| 2865 | 18 | 2 | 0.425000  | -4.030399128 | 8.911817322  | -7.846384937  | 1 | 0 | 1 | # | ho  |
| 2866 | 18 | 2 | 0.425000  | -3.734650872 | 13.360932678 | -10.818615063 | 1 | 0 | 1 | # | ho  |
| 2867 | 18 | 2 | 0.425000  | -1.146300872 | 17.815482678 | -10.818615063 | 1 | 0 | 1 | # | ho  |
| 2868 | 18 | 3 | -1.050000 | -4.195385345 | 10.586601481 | -10.365922068 | 1 | 0 | 1 | # | ob  |
| 2869 | 18 | 3 | -1.050000 | -0.153182736 | 15.214196126 | -12.564346262 | 1 | 0 | 1 | # | ob  |
| 2870 | 18 | 3 | -1.050000 | -1.606455513 | 11.682749320 | -10.366131378 | 1 | 0 | 1 | # | ob  |
| 2871 | 18 | 3 | -1.050000 | -2.741860908 | 15.957810300 | -12.565579711 | 1 | 0 | 1 | # | ob  |
| 2872 | 18 | 3 | -1.050000 | -4.194805513 | 16.137299320 | -10.366131378 | 1 | 0 | 1 | # | ob  |
| 2873 | 18 | 3 | -1.050000 | -3.570244487 | 15.044550680 | -8.298868622  | 1 | 0 | 1 | # | ob  |
| 2874 | 18 | 3 | -1.050000 | -0.153510908 | 11.503260300 | -12.565579711 | 1 | 0 | 1 | # | ob  |
| 2875 | 18 | 3 | -1.050000 | -3.569664655 | 11.686148519 | -8.299077932  | 1 | 0 | 1 | # | ob  |
| 2876 | 18 | 3 | -1.050000 | -2.435167264 | 15.967653874 | -6.100653738  | 1 | 0 | 1 | # | ob  |
| 2877 | 18 | 3 | -1.050000 | -0.981314655 | 16.140698519 | -8.299077932  | 1 | 0 | 1 | # | ob  |
| 2878 | 18 | 3 | -1.050000 | -5.023517264 | 11.513103874 | -6.100653738  | 1 | 0 | 1 | # | ob  |
| 2879 | 18 | 3 | -1.050000 | -2.434839092 | 10.769489700 | -6.099420289  | 1 | 0 | 1 | # | ob  |
| 2880 | 18 | 6 | -0.950000 | -3.177442343 | 8.910040996  | -8.319917115  | 1 | 0 | 1 | # | oh  |
| 2881 | 18 | 3 | -1.050000 | -0.509618349 | 8.913076970  | -6.271017583  | 1 | 0 | 1 | # | ob  |
| 2882 | 18 | 6 | -0.950000 | -0.589092343 | 13.364590996 | -8.319917115  | 1 | 0 | 1 | # | oh  |
| 2883 | 18 | 3 | -1.050000 | -3.097968349 | 13.367626970 | -6.271017583  | 1 | 0 | 1 | # | ob  |
| 2884 | 18 | 6 | -0.950000 | -1.999257657 | 17.817259004 | -10.345082885 | 1 | 0 | 1 | # | oh  |
| 2885 | 18 | 3 | -1.050000 | -4.667081651 | 17.814223030 | -12.393982417 | 1 | 0 | 1 | # | ob  |
| 2886 | 18 | 6 | -0.950000 | -4.587607657 | 13.362709004 | -10.345082885 | 1 | 0 | 1 | # | oh  |
| 2887 | 18 | 3 | -1.050000 | -2.078731651 | 13.359673030 | -12.393982417 | 1 | 0 | 1 | # | ob  |
| 2888 | 18 | 3 | -1.050000 | -0.981894487 | 10.590000680 | -8.298868622  | 1 | 0 | 1 | # | ob  |
| 2889 | 18 | 3 | -1.050000 | -5.023189092 | 15.224039700 | -6.099420289  | 1 | 0 | 1 | # | ob  |
| 2890 | 18 | 3 | -1.050000 | -1.607035345 | 15.041151481 | -10.365922068 | 1 | 0 | 1 | # | ob  |
| 2891 | 18 | 3 | -1.050000 | -2.741532736 | 10.759646126 | -12.564346262 | 1 | 0 | 1 | # | ob  |
| 2892 | 18 | 7 | 2.100000  | -0.953702986 | 10.436219204 | -6.669722830  | 1 | 0 | 1 | # | st  |
| 2893 | 18 | 7 | 2.100000  | -1.634672226 | 14.882470782 | -11.994298097 | 1 | 0 | 1 | # | st  |
| 2894 | 18 | 7 | 2.100000  | -4.222997014 | 16.291080796 | -11.995277170 | 1 | 0 | 1 | # | st  |
| 2895 | 18 | 7 | 2.100000  | -1.634647014 | 11.836530796 | -11.995277170 | 1 | 0 | 1 | # | st  |
| 2896 | 18 | 7 | 2.100000  | -0.953677774 | 16.299379218 | -6.670701903  | 1 | 0 | 1 | # | st  |
| 2897 | 18 | 7 | 2.100000  | -3.542027774 | 11.844829218 | -6.670701903  | 1 | 0 | 1 | # | st  |
| 2898 | 18 | 7 | 2.100000  | -3.542052986 | 14.890769204 | -6.669722830  | 1 | 0 | 1 | # | st  |
| 2899 | 18 | 7 | 2.100000  | -4.223022226 | 10.427920782 | -11.994298097 | 1 | 0 | 1 | # | st  |
| 2900 | 18 | 1 | 1.575000  | -2.588144971 | 19.292861568 | -9.332229368  | 1 | 0 | 1 | # | ao  |
| 2901 | 18 | 1 | 1.575000  | -5.176494971 | 23.747411568 | -9.332229368  | 1 | 0 | 1 | # | ao  |
| 2902 | 18 | 1 | 1.575000  | -2.588555029 | 25.252638432 | -9.332770632  | 1 | 0 | 1 | # | ao  |
| 2903 | 18 | 1 | 1.575000  | -0.000205029 | 20.798088432 | -9.332770632  | 1 | 0 | 1 | # | ao  |
| 2904 | 18 | 2 | 0.425000  | -1.442049128 | 22.275467322 | -7.846384937  | 1 | 0 | 1 | # | ho  |
| 2905 | 18 | 2 | 0.425000  | -4.030399128 | 17.820917322 | -7.846384937  | 1 | 0 | 1 | # | ho  |
| 2906 | 18 | 2 | 0.425000  | -3.734650872 | 22.270032678 | -10.818615063 | 1 | 0 | 1 | # | ho  |
| 2907 | 18 | 2 | 0.425000  | -1.146300872 | 26.724582678 | -10.818615063 | 1 | 0 | 1 | # | ho  |
| 2908 | 18 | 3 | -1.050000 | -4.195385345 | 19.495701481 | -10.365922068 | 1 | 0 | 1 | # | ob  |
| 2909 | 18 | 3 | -1.050000 | -0.153182736 | 24.123296126 | -12.564346262 | 1 | 0 | 1 | # | ob  |
| 2910 | 18 | 3 | -1.050000 | -1.606455513 | 20.591849320 | -10.366131378 | 1 | 0 | 1 | # | ob  |
| 2911 | 18 | 3 | -1.050000 | -2.741860908 | 24.866910300 | -12.565579711 | 1 | 0 | 1 | # | ob  |
| 2912 | 18 | 3 | -1.050000 | -4.194805513 | 25.046399320 | -10.366131378 | 1 | 0 | 1 | # | ob  |

|      |    |   |           |              |               |               |   |   |   |   |     |
|------|----|---|-----------|--------------|---------------|---------------|---|---|---|---|-----|
| 2913 | 18 | 3 | -1.050000 | -3.570244487 | 23.953650680  | -8.298868622  | 1 | 0 | 1 | # | ob  |
| 2914 | 18 | 3 | -1.050000 | -0.153510908 | 20.412360300  | -12.565579711 | 1 | 0 | 1 | # | ob  |
| 2915 | 18 | 3 | -1.050000 | -3.569664655 | 20.595248519  | -8.299077932  | 1 | 0 | 1 | # | ob  |
| 2916 | 18 | 3 | -1.050000 | -2.435167264 | 24.876753874  | -6.100653738  | 1 | 0 | 1 | # | ob  |
| 2917 | 18 | 3 | -1.050000 | -0.981314655 | 25.049798519  | -8.299077932  | 1 | 0 | 1 | # | ob  |
| 2918 | 18 | 3 | -1.050000 | -5.023517264 | 20.422203874  | -6.100653738  | 1 | 0 | 1 | # | ob  |
| 2919 | 18 | 3 | -1.050000 | -2.434839092 | 19.678589700  | -6.099420289  | 1 | 0 | 1 | # | ob  |
| 2920 | 18 | 6 | -0.950000 | -3.177442343 | 17.819140996  | -8.319917115  | 1 | 0 | 1 | # | oh  |
| 2921 | 18 | 3 | -1.050000 | -0.509618349 | 17.822176970  | -6.271017583  | 1 | 0 | 1 | # | ob  |
| 2922 | 18 | 6 | -0.950000 | -0.589092343 | 22.273690996  | -8.319917115  | 1 | 0 | 1 | # | oh  |
| 2923 | 18 | 3 | -1.050000 | -3.097968349 | 22.276726970  | -6.271017583  | 1 | 0 | 1 | # | ob  |
| 2924 | 18 | 6 | -0.950000 | -1.999257657 | 26.726359004  | -10.345082885 | 1 | 0 | 1 | # | oh  |
| 2925 | 18 | 3 | -1.050000 | -4.667081651 | 26.723323030  | -12.393982417 | 1 | 0 | 1 | # | ob  |
| 2926 | 18 | 6 | -0.950000 | -4.587607657 | 22.271809004  | -10.345082885 | 1 | 0 | 1 | # | oh  |
| 2927 | 18 | 3 | -1.050000 | -2.078731651 | 22.268773030  | -12.393982417 | 1 | 0 | 1 | # | ob  |
| 2928 | 18 | 3 | -1.050000 | -0.981894487 | 19.499100680  | -8.298868622  | 1 | 0 | 1 | # | ob  |
| 2929 | 18 | 3 | -1.050000 | -5.023189092 | 24.133139700  | -6.099420289  | 1 | 0 | 1 | # | ob  |
| 2930 | 18 | 3 | -1.050000 | -1.607035345 | 23.950251481  | -10.365922068 | 1 | 0 | 1 | # | ob  |
| 2931 | 18 | 3 | -1.050000 | -2.741532736 | 19.668746126  | -12.564346262 | 1 | 0 | 1 | # | ob  |
| 2932 | 18 | 7 | 2.100000  | -0.953702986 | 19.345319204  | -6.669722830  | 1 | 0 | 1 | # | st  |
| 2933 | 18 | 7 | 2.100000  | -1.634672226 | 23.791570782  | -11.994298097 | 1 | 0 | 1 | # | st  |
| 2934 | 18 | 7 | 2.100000  | -4.222997014 | 25.200180796  | -11.995277170 | 1 | 0 | 1 | # | st  |
| 2935 | 18 | 7 | 2.100000  | -1.634647014 | 20.745630796  | -11.995277170 | 1 | 0 | 1 | # | st  |
| 2936 | 18 | 7 | 2.100000  | -0.953677774 | 25.208479218  | -6.670701903  | 1 | 0 | 1 | # | st  |
| 2937 | 18 | 7 | 2.100000  | -3.542027774 | 20.753929218  | -6.670701903  | 1 | 0 | 1 | # | st  |
| 2938 | 18 | 7 | 2.100000  | -3.542052986 | 23.799869204  | -6.669722830  | 1 | 0 | 1 | # | st  |
| 2939 | 18 | 7 | 2.100000  | -4.223022226 | 19.337020782  | -11.994298097 | 1 | 0 | 1 | # | st  |
| 2940 | 18 | 1 | 1.575000  | -2.588144971 | -27.434438432 | -9.332229368  | 1 | 1 | 1 | # | ao  |
| 2941 | 18 | 1 | 1.575000  | -5.176494971 | -22.979888432 | -9.332229368  | 1 | 1 | 1 | # | ao  |
| 2942 | 18 | 1 | 1.575000  | -2.588555029 | -21.474661568 | -9.332770632  | 1 | 1 | 1 | # | ao  |
| 2943 | 18 | 1 | 1.575000  | -0.000205029 | -25.929211568 | -9.332770632  | 1 | 1 | 1 | # | ao  |
| 2944 | 18 | 2 | 0.425000  | -1.442049128 | -24.451832678 | -7.846384937  | 1 | 1 | 1 | # | ho  |
| 2945 | 18 | 2 | 0.425000  | -4.030399128 | 26.730017322  | -7.846384937  | 1 | 0 | 1 | # | ho  |
| 2946 | 18 | 2 | 0.425000  | -3.734650872 | -24.457267322 | -10.818615063 | 1 | 1 | 1 | # | ho  |
| 2947 | 18 | 2 | 0.425000  | -1.146300872 | -20.002717322 | -10.818615063 | 1 | 1 | 1 | # | ho  |
| 2948 | 18 | 3 | -1.050000 | -4.195385345 | -27.231598519 | -10.365922068 | 1 | 1 | 1 | # | ob  |
| 2949 | 18 | 3 | -1.050000 | -0.153182736 | -22.604003874 | -12.564346262 | 1 | 1 | 1 | # | ob  |
| 2950 | 18 | 3 | -1.050000 | -1.606455513 | -26.135450680 | -10.366131378 | 1 | 1 | 1 | # | ob  |
| 2951 | 18 | 3 | -1.050000 | -2.741860908 | -21.860389700 | -12.565579711 | 1 | 1 | 1 | # | ob  |
| 2952 | 18 | 3 | -1.050000 | -4.194805513 | -21.680900680 | -10.366131378 | 1 | 1 | 1 | # | ob  |
| 2953 | 18 | 3 | -1.050000 | -3.570244487 | -22.773649320 | -8.298868622  | 1 | 1 | 1 | # | ob  |
| 2954 | 18 | 3 | -1.050000 | -0.153510908 | -26.314939700 | -12.565579711 | 1 | 1 | 1 | # | ob  |
| 2955 | 18 | 3 | -1.050000 | -3.569664655 | -26.132051481 | -8.299077932  | 1 | 1 | 1 | # | ob  |
| 2956 | 18 | 3 | -1.050000 | -2.435167264 | -21.850546126 | -6.100653738  | 1 | 1 | 1 | # | ob  |
| 2957 | 18 | 3 | -1.050000 | -0.981314655 | -21.677501481 | -8.299077932  | 1 | 1 | 1 | # | ob  |
| 2958 | 18 | 3 | -1.050000 | -5.023517264 | -26.305096126 | -6.100653738  | 1 | 1 | 1 | # | ob  |
| 2959 | 18 | 3 | -1.050000 | -2.434839092 | -27.048710300 | -6.099420289  | 1 | 1 | 1 | # | ob  |
| 2960 | 18 | 6 | -0.950000 | -3.177442343 | 26.728240996  | -8.319917115  | 1 | 0 | 1 | # | oh  |
| 2961 | 18 | 3 | -1.050000 | -0.509618349 | 26.731276970  | -6.271017583  | 1 | 0 | 1 | # | ob  |
| 2962 | 18 | 6 | -0.950000 | -0.589092343 | -24.453609004 | -8.319917115  | 1 | 1 | 1 | # | oh  |
| 2963 | 18 | 3 | -1.050000 | -3.097968349 | -24.450573030 | -6.271017583  | 1 | 1 | 1 | # | ob  |
| 2964 | 18 | 4 | -0.950000 | -1.999257657 | -20.000940996 | -10.345082885 | 1 | 1 | 1 | # | oho |
| 2965 | 18 | 5 | -0.950000 | -4.667081651 | -20.003976970 | -12.393982417 | 1 | 1 | 1 | # | oht |
| 2966 | 18 | 6 | -0.950000 | -4.587607657 | -24.455490996 | -10.345082885 | 1 | 1 | 1 | # | oh  |
| 2967 | 18 | 3 | -1.050000 | -2.078731651 | -24.458526970 | -12.393982417 | 1 | 1 | 1 | # | ob  |
| 2968 | 18 | 3 | -1.050000 | -0.981894487 | -27.228199320 | -8.298868622  | 1 | 1 | 1 | # | ob  |
| 2969 | 18 | 3 | -1.050000 | -5.023189092 | -22.594160300 | -6.099420289  | 1 | 1 | 1 | # | ob  |
| 2970 | 18 | 3 | -1.050000 | -1.607035345 | -22.777048519 | -10.365922068 | 1 | 1 | 1 | # | ob  |
| 2971 | 18 | 3 | -1.050000 | -2.741532736 | -27.058553874 | -12.564346262 | 1 | 1 | 1 | # | ob  |
| 2972 | 18 | 7 | 2.100000  | -0.953702986 | -27.381980796 | -6.669722830  | 1 | 1 | 1 | # | st  |
| 2973 | 18 | 7 | 2.100000  | -1.634672226 | -22.935729218 | -11.994298097 | 1 | 1 | 1 | # | st  |
| 2974 | 18 | 7 | 2.100000  | -4.222997014 | -21.527119204 | -11.995277170 | 1 | 1 | 1 | # | st  |
| 2975 | 18 | 7 | 2.100000  | -1.634647014 | -25.981669204 | -11.995277170 | 1 | 1 | 1 | # | st  |
| 2976 | 18 | 7 | 2.100000  | -0.953677774 | -21.518820782 | -6.670701903  | 1 | 1 | 1 | # | st  |
| 2977 | 18 | 7 | 2.100000  | -3.542027774 | -25.973370782 | -6.670701903  | 1 | 1 | 1 | # | st  |
| 2978 | 18 | 7 | 2.100000  | -3.542052986 | -22.927430796 | -6.669722830  | 1 | 1 | 1 | # | st  |
| 2979 | 18 | 7 | 2.100000  | -4.223022226 | -27.390279218 | -11.994298097 | 1 | 1 | 1 | # | st  |
| 2980 | 18 | 5 | -0.950000 | -0.439233573 | -19.680858114 | 2.588720950   | 1 | 1 | 1 | # | oht |
| 2981 | 18 | 5 | -0.950000 | -4.871761797 | -0.272172439  | -2.801727113  | 1 | 0 | 1 | # | oht |
| 2982 | 18 | 2 | 0.425000  | -5.220127747 | -1.308055357  | -2.995860493  | 1 | 0 | 1 | # | ho  |
| 2983 | 18 | 2 | 0.425000  | -0.176711381 | -1.054326608  | 3.097070537   | 1 | 0 | 1 | # | ho  |
| 2984 | 18 | 2 | 0.425000  | -0.312851036 | -18.596754758 | 2.386613544   | 1 | 1 | 1 | # | ho  |
| 2985 | 18 | 2 | 0.425000  | -5.063651085 | -19.012312375 | -3.363863051  | 1 | 1 | 1 | # | ho  |
| 2986 | 19 | 1 | 1.575000  | 2.588555029  | 1.474661568   | 0.000270632   | 0 | 0 | 1 | # | ao  |
| 2987 | 19 | 1 | 1.575000  | 0.000205029  | 5.929211568   | 0.000270632   | 0 | 0 | 1 | # | ao  |
| 2988 | 19 | 1 | 1.575000  | 2.588144971  | 7.434438432   | -0.000270632  | 0 | 0 | 1 | # | ao  |
| 2989 | 19 | 1 | 1.575000  | 5.176494971  | 2.979888432   | -0.000270632  | 0 | 0 | 1 | # | ao  |
| 2990 | 19 | 2 | 0.425000  | 3.734650872  | 4.457267322   | 1.486115063   | 0 | 0 | 1 | # | ho  |
| 2991 | 19 | 2 | 0.425000  | 1.146300872  | 0.002717322   | 1.486115063   | 0 | 0 | 1 | # | ho  |
| 2992 | 19 | 2 | 0.425000  | 1.442049128  | 4.451832678   | -1.486115063  | 0 | 0 | 1 | # | ho  |
| 2993 | 19 | 2 | 0.425000  | 4.030399128  | 8.906382678   | -1.486115063  | 0 | 0 | 1 | # | ho  |
| 2994 | 19 | 3 | -1.050000 | 0.981314655  | 1.677501481   | -1.033422068  | 0 | 0 | 1 | # | ob  |
| 2995 | 19 | 3 | -1.050000 | 5.023517264  | 6.305096126   | -3.231846262  | 0 | 0 | 1 | # | ob  |
| 2996 | 19 | 3 | -1.050000 | 3.570244487  | 2.773649320   | -1.033631378  | 0 | 0 | 1 | # | ob  |
| 2997 | 19 | 3 | -1.050000 | 2.434839092  | 7.048710300   | -3.233079711  | 0 | 0 | 1 | # | ob  |
| 2998 | 19 | 3 | -1.050000 | 0.981894487  | 7.228199320   | -1.033631378  | 0 | 0 | 1 | # | ob  |
| 2999 | 19 | 3 | -1.050000 | 1.606455513  | 6.135450680   | 1.033631378   | 0 | 0 | 1 | # | ob  |
| 3000 | 19 | 3 | -1.050000 | 5.023189092  | 2.594160300   | -3.233079711  | 0 | 0 | 1 | # | ob  |
| 3001 | 19 | 3 | -1.050000 | 1.607035345  | 2.777048519   | 1.033422068   | 0 | 0 | 1 | # | ob  |
| 3002 | 19 | 3 | -1.050000 | 2.741532736  | 7.058553874   | 3.231846262   | 0 | 0 | 1 | # | ob  |
| 3003 | 19 | 3 | -1.050000 | 4.195385345  | 7.231598519   | 1.033422068   | 0 | 0 | 1 | # | ob  |
| 3004 | 19 | 3 | -1.050000 | 0.153182736  | 2.604003874   | 3.231846262   | 0 | 0 | 1 | # | ob  |
| 3005 | 19 | 3 | -1.050000 | 2.741860908  | 1.860389700   | 3.233079711   | 0 | 0 | 1 | # | ob  |

|      |    |   |           |             |              |              |   |   |   |   |     |
|------|----|---|-----------|-------------|--------------|--------------|---|---|---|---|-----|
| 3006 | 19 | 4 | -0.950000 | 1.999257657 | 0.000940996  | 1.012582885  | 0 | 0 | 1 | # | oho |
| 3007 | 19 | 5 | -0.950000 | 4.667081651 | 0.003976970  | 3.061482417  | 0 | 0 | 1 | # | oht |
| 3008 | 19 | 6 | -0.950000 | 4.587607657 | 4.455490996  | 1.012582885  | 0 | 0 | 1 | # | oh  |
| 3009 | 19 | 3 | -1.050000 | 2.078731651 | 4.458526970  | 3.061482417  | 0 | 0 | 1 | # | ob  |
| 3010 | 19 | 6 | -0.950000 | 3.177442343 | 8.908159004  | -1.012582885 | 0 | 0 | 1 | # | oh  |
| 3011 | 19 | 3 | -1.050000 | 0.509618349 | 8.905123030  | -3.061482417 | 0 | 0 | 1 | # | ob  |
| 3012 | 19 | 6 | -0.950000 | 0.589092343 | 4.453609004  | -1.012582885 | 0 | 0 | 1 | # | oh  |
| 3013 | 19 | 3 | -1.050000 | 3.097968349 | 4.450573030  | -3.061482417 | 0 | 0 | 1 | # | ob  |
| 3014 | 19 | 3 | -1.050000 | 4.194805513 | 1.680900680  | 1.033631378  | 0 | 0 | 1 | # | ob  |
| 3015 | 19 | 3 | -1.050000 | 0.153510908 | 6.314939700  | 3.233079711  | 0 | 0 | 1 | # | ob  |
| 3016 | 19 | 3 | -1.050000 | 3.569664655 | 6.132051481  | -1.033422068 | 0 | 0 | 1 | # | ob  |
| 3017 | 19 | 3 | -1.050000 | 2.435167264 | 1.850546126  | -3.231846262 | 0 | 0 | 1 | # | ob  |
| 3018 | 19 | 7 | 2.100000  | 4.222997014 | 1.527119204  | 2.662777170  | 0 | 0 | 1 | # | st  |
| 3019 | 19 | 7 | 2.100000  | 3.542027774 | 5.973370782  | -2.661798097 | 0 | 0 | 1 | # | st  |
| 3020 | 19 | 7 | 2.100000  | 0.953702986 | 7.381980796  | -2.662777170 | 0 | 0 | 1 | # | st  |
| 3021 | 19 | 7 | 2.100000  | 3.542052986 | 2.927430796  | -2.662777170 | 0 | 0 | 1 | # | st  |
| 3022 | 19 | 7 | 2.100000  | 4.223022226 | 7.390279218  | 2.661798097  | 0 | 0 | 1 | # | st  |
| 3023 | 19 | 7 | 2.100000  | 1.634672226 | 2.935729218  | 2.661798097  | 0 | 0 | 1 | # | st  |
| 3024 | 19 | 7 | 2.100000  | 1.634647014 | 5.981669204  | 2.662777170  | 0 | 0 | 1 | # | st  |
| 3025 | 19 | 7 | 2.100000  | 0.953677774 | 1.518820782  | -2.661798097 | 0 | 0 | 1 | # | st  |
| 3026 | 19 | 1 | 1.575000  | 2.588555029 | 10.383761568 | 0.000270632  | 0 | 0 | 1 | # | ao  |
| 3027 | 19 | 1 | 1.575000  | 0.000205029 | 14.838311568 | 0.000270632  | 0 | 0 | 1 | # | ao  |
| 3028 | 19 | 1 | 1.575000  | 2.588144971 | 16.343538432 | -0.000270632 | 0 | 0 | 1 | # | ao  |
| 3029 | 19 | 1 | 1.575000  | 5.176494971 | 11.888988432 | -0.000270632 | 0 | 0 | 1 | # | ao  |
| 3030 | 19 | 2 | 0.425000  | 3.734650872 | 13.366367322 | 1.486115063  | 0 | 0 | 1 | # | ho  |
| 3031 | 19 | 2 | 0.425000  | 1.146300872 | 8.911817322  | 1.486115063  | 0 | 0 | 1 | # | ho  |
| 3032 | 19 | 2 | 0.425000  | 1.442049128 | 13.360932678 | -1.486115063 | 0 | 0 | 1 | # | ho  |
| 3033 | 19 | 2 | 0.425000  | 4.030399128 | 17.815482678 | -1.486115063 | 0 | 0 | 1 | # | ho  |
| 3034 | 19 | 3 | -1.050000 | 0.981314655 | 10.586601481 | -1.033422068 | 0 | 0 | 1 | # | ob  |
| 3035 | 19 | 3 | -1.050000 | 5.023517264 | 15.214196126 | -3.231846262 | 0 | 0 | 1 | # | ob  |
| 3036 | 19 | 3 | -1.050000 | 3.570244487 | 11.682749320 | -1.033631378 | 0 | 0 | 1 | # | ob  |
| 3037 | 19 | 3 | -1.050000 | 2.434839092 | 15.957810300 | -3.233079711 | 0 | 0 | 1 | # | ob  |
| 3038 | 19 | 3 | -1.050000 | 0.981894487 | 16.137299320 | -1.033631378 | 0 | 0 | 1 | # | ob  |
| 3039 | 19 | 3 | -1.050000 | 1.606455513 | 15.044550680 | 1.033631378  | 0 | 0 | 1 | # | ob  |
| 3040 | 19 | 3 | -1.050000 | 5.023189092 | 11.503260300 | -3.233079711 | 0 | 0 | 1 | # | ob  |
| 3041 | 19 | 3 | -1.050000 | 1.607035345 | 11.686148519 | 1.033422068  | 0 | 0 | 1 | # | ob  |
| 3042 | 19 | 3 | -1.050000 | 2.741532736 | 15.967653874 | 3.231846262  | 0 | 0 | 1 | # | ob  |
| 3043 | 19 | 3 | -1.050000 | 4.195385345 | 16.140698519 | 1.033422068  | 0 | 0 | 1 | # | ob  |
| 3044 | 19 | 3 | -1.050000 | 0.153182736 | 11.513103874 | 3.231846262  | 0 | 0 | 1 | # | ob  |
| 3045 | 19 | 3 | -1.050000 | 2.741860908 | 10.769489700 | 3.233079711  | 0 | 0 | 1 | # | ob  |
| 3046 | 19 | 6 | -0.950000 | 1.999257657 | 8.910040996  | 1.012582885  | 0 | 0 | 1 | # | oh  |
| 3047 | 19 | 3 | -1.050000 | 4.667081651 | 8.913076970  | 3.061482417  | 0 | 0 | 1 | # | ob  |
| 3048 | 19 | 6 | -0.950000 | 4.587607657 | 13.364590996 | 1.012582885  | 0 | 0 | 1 | # | oh  |
| 3049 | 19 | 3 | -1.050000 | 2.078731651 | 13.367626970 | 3.061482417  | 0 | 0 | 1 | # | ob  |
| 3050 | 19 | 6 | -0.950000 | 3.177442343 | 17.817259004 | -1.012582885 | 0 | 0 | 1 | # | oh  |
| 3051 | 19 | 3 | -1.050000 | 0.509618349 | 17.814223030 | -3.061482417 | 0 | 0 | 1 | # | ob  |
| 3052 | 19 | 6 | -0.950000 | 0.589092343 | 13.362709004 | -1.012582885 | 0 | 0 | 1 | # | oh  |
| 3053 | 19 | 3 | -1.050000 | 3.097968349 | 13.359673030 | -3.061482417 | 0 | 0 | 1 | # | ob  |
| 3054 | 19 | 3 | -1.050000 | 4.194805513 | 10.590000680 | 1.033631378  | 0 | 0 | 1 | # | ob  |
| 3055 | 19 | 3 | -1.050000 | 0.153510908 | 15.224039700 | 3.233079711  | 0 | 0 | 1 | # | ob  |
| 3056 | 19 | 3 | -1.050000 | 3.569664655 | 15.041151481 | -1.033422068 | 0 | 0 | 1 | # | ob  |
| 3057 | 19 | 3 | -1.050000 | 2.435167264 | 10.759646126 | -3.231846262 | 0 | 0 | 1 | # | ob  |
| 3058 | 19 | 7 | 2.100000  | 4.222997014 | 10.436219204 | 2.662777170  | 0 | 0 | 1 | # | st  |
| 3059 | 19 | 7 | 2.100000  | 3.542027774 | 14.882470782 | -2.661798097 | 0 | 0 | 1 | # | st  |
| 3060 | 19 | 7 | 2.100000  | 0.953702986 | 16.291080796 | -2.662777170 | 0 | 0 | 1 | # | st  |
| 3061 | 19 | 7 | 2.100000  | 3.542052986 | 11.836530796 | -2.662777170 | 0 | 0 | 1 | # | st  |
| 3062 | 19 | 7 | 2.100000  | 4.223022226 | 16.299379218 | 2.661798097  | 0 | 0 | 1 | # | st  |
| 3063 | 19 | 7 | 2.100000  | 1.634672226 | 11.844829218 | 2.661798097  | 0 | 0 | 1 | # | st  |
| 3064 | 19 | 7 | 2.100000  | 1.634647014 | 14.890769204 | 2.662777170  | 0 | 0 | 1 | # | st  |
| 3065 | 19 | 7 | 2.100000  | 0.953677774 | 10.427920782 | -2.661798097 | 0 | 0 | 1 | # | st  |
| 3066 | 19 | 1 | 1.575000  | 2.588555029 | 19.292861568 | 0.000270632  | 0 | 0 | 1 | # | ao  |
| 3067 | 19 | 1 | 1.575000  | 0.000205029 | 23.747411568 | 0.000270632  | 0 | 0 | 1 | # | ao  |
| 3068 | 19 | 1 | 1.575000  | 2.588144971 | 25.252638432 | -0.000270632 | 0 | 0 | 1 | # | ao  |
| 3069 | 19 | 1 | 1.575000  | 5.176494971 | 20.798088432 | -0.000270632 | 0 | 0 | 1 | # | ao  |
| 3070 | 19 | 2 | 0.425000  | 3.734650872 | 22.275467322 | 1.486115063  | 0 | 0 | 1 | # | ho  |
| 3071 | 19 | 2 | 0.425000  | 1.146300872 | 17.820917322 | 1.486115063  | 0 | 0 | 1 | # | ho  |
| 3072 | 19 | 2 | 0.425000  | 1.442049128 | 22.270032678 | -1.486115063 | 0 | 0 | 1 | # | ho  |
| 3073 | 19 | 2 | 0.425000  | 4.030399128 | 26.724582678 | -1.486115063 | 0 | 0 | 1 | # | ho  |
| 3074 | 19 | 3 | -1.050000 | 0.981314655 | 19.495701481 | -1.033422068 | 0 | 0 | 1 | # | ob  |
| 3075 | 19 | 3 | -1.050000 | 5.023517264 | 24.123296126 | -3.231846262 | 0 | 0 | 1 | # | ob  |
| 3076 | 19 | 3 | -1.050000 | 3.570244487 | 20.591849320 | -1.033631378 | 0 | 0 | 1 | # | ob  |
| 3077 | 19 | 3 | -1.050000 | 2.434839092 | 24.866910300 | -3.233079711 | 0 | 0 | 1 | # | ob  |
| 3078 | 19 | 3 | -1.050000 | 0.981894487 | 25.046399320 | -1.033631378 | 0 | 0 | 1 | # | ob  |
| 3079 | 19 | 3 | -1.050000 | 1.606455513 | 23.953650680 | 1.033631378  | 0 | 0 | 1 | # | ob  |
| 3080 | 19 | 3 | -1.050000 | 5.023189092 | 20.412360300 | -3.233079711 | 0 | 0 | 1 | # | ob  |
| 3081 | 19 | 3 | -1.050000 | 1.607035345 | 20.595248519 | 1.033422068  | 0 | 0 | 1 | # | ob  |
| 3082 | 19 | 3 | -1.050000 | 2.741532736 | 24.876753874 | 3.231846262  | 0 | 0 | 1 | # | ob  |
| 3083 | 19 | 3 | -1.050000 | 4.195385345 | 25.049798519 | 1.033422068  | 0 | 0 | 1 | # | ob  |
| 3084 | 19 | 3 | -1.050000 | 0.153182736 | 20.422203874 | 3.231846262  | 0 | 0 | 1 | # | ob  |
| 3085 | 19 | 3 | -1.050000 | 2.741860908 | 19.678589700 | 3.233079711  | 0 | 0 | 1 | # | ob  |
| 3086 | 19 | 6 | -0.950000 | 1.999257657 | 17.819140996 | 1.012582885  | 0 | 0 | 1 | # | oh  |
| 3087 | 19 | 3 | -1.050000 | 4.667081651 | 17.822176970 | 3.061482417  | 0 | 0 | 1 | # | ob  |
| 3088 | 19 | 6 | -0.950000 | 4.587607657 | 22.273690996 | 1.012582885  | 0 | 0 | 1 | # | oh  |
| 3089 | 19 | 3 | -1.050000 | 2.078731651 | 22.276726970 | 3.061482417  | 0 | 0 | 1 | # | ob  |
| 3090 | 19 | 6 | -0.950000 | 3.177442343 | 26.726359004 | -1.012582885 | 0 | 0 | 1 | # | oh  |
| 3091 | 19 | 3 | -1.050000 | 0.509618349 | 26.723323030 | -3.061482417 | 0 | 0 | 1 | # | ob  |
| 3092 | 19 | 6 | -0.950000 | 0.589092343 | 22.271809004 | -1.012582885 | 0 | 0 | 1 | # | oh  |
| 3093 | 19 | 3 | -1.050000 | 3.097968349 | 22.268773030 | -3.061482417 | 0 | 0 | 1 | # | ob  |
| 3094 | 19 | 3 | -1.050000 | 4.194805513 | 19.499100680 | 1.033631378  | 0 | 0 | 1 | # | ob  |
| 3095 | 19 | 3 | -1.050000 | 0.153510908 | 24.133139700 | 3.233079711  | 0 | 0 | 1 | # | ob  |
| 3096 | 19 | 3 | -1.050000 | 3.569664655 | 23.950251481 | -1.033422068 | 0 | 0 | 1 | # | ob  |
| 3097 | 19 | 3 | -1.050000 | 2.435167264 | 19.668746126 | -3.231846262 | 0 | 0 | 1 | # | ob  |
| 3098 | 19 | 7 | 2.100000  | 4.222997014 | 19.345319204 | 2.662777170  | 0 | 0 | 1 | # | st  |



|      |    |   |           |              |               |              |   |   |   |   |     |
|------|----|---|-----------|--------------|---------------|--------------|---|---|---|---|-----|
| 3099 | 19 | 7 | 2.100000  | 3.542027774  | 23.791570782  | -2.661798097 | 0 | 0 | 1 | # | st  |
| 3100 | 19 | 7 | 2.100000  | 0.953702986  | 25.200180796  | -2.662777170 | 0 | 0 | 1 | # | st  |
| 3101 | 19 | 7 | 2.100000  | 3.542052986  | 20.745630796  | -2.662777170 | 0 | 0 | 1 | # | st  |
| 3102 | 19 | 7 | 2.100000  | 4.223022226  | 25.208479218  | 2.661798097  | 0 | 0 | 1 | # | st  |
| 3103 | 19 | 7 | 2.100000  | 1.634672226  | 20.753929218  | 2.661798097  | 0 | 0 | 1 | # | st  |
| 3104 | 19 | 7 | 2.100000  | 1.634647014  | 23.799869204  | 2.662777170  | 0 | 0 | 1 | # | st  |
| 3105 | 19 | 7 | 2.100000  | 0.953677774  | 19.337020782  | -2.661798097 | 0 | 0 | 1 | # | st  |
| 3106 | 19 | 1 | 1.575000  | 2.588555029  | -27.434438432 | 0.000270632  | 0 | 0 | 1 | # | ao  |
| 3107 | 19 | 1 | 1.575000  | 0.000205029  | -22.979888432 | 0.000270632  | 0 | 0 | 1 | # | ao  |
| 3108 | 19 | 1 | 1.575000  | 2.588144971  | -21.474661568 | -0.000270632 | 0 | 0 | 1 | # | ao  |
| 3109 | 19 | 1 | 1.575000  | 5.176494971  | -25.929211568 | -0.000270632 | 0 | 0 | 1 | # | ao  |
| 3110 | 19 | 2 | 0.425000  | 3.734650872  | -24.451832678 | 1.486115063  | 0 | 0 | 1 | # | ho  |
| 3111 | 19 | 2 | 0.425000  | 1.146300872  | 26.730017322  | 1.486115063  | 0 | 0 | 1 | # | ho  |
| 3112 | 19 | 2 | 0.425000  | 1.442049128  | -24.457267322 | -1.486115063 | 0 | 0 | 1 | # | ho  |
| 3113 | 19 | 2 | 0.425000  | 4.030399128  | -20.002717322 | -1.486115063 | 0 | 0 | 1 | # | ho  |
| 3114 | 19 | 3 | -1.050000 | 0.981314655  | -27.231598519 | -1.033422068 | 0 | 0 | 1 | # | ob  |
| 3115 | 19 | 3 | -1.050000 | 5.023517264  | -22.604003874 | -3.231846262 | 0 | 0 | 1 | # | ob  |
| 3116 | 19 | 3 | -1.050000 | 3.570244487  | -26.135450680 | -1.033631378 | 0 | 0 | 1 | # | ob  |
| 3117 | 19 | 3 | -1.050000 | 2.434839092  | -21.860389700 | -3.233079711 | 0 | 0 | 1 | # | ob  |
| 3118 | 19 | 3 | -1.050000 | 0.981894487  | -21.680900680 | -1.033631378 | 0 | 0 | 1 | # | ob  |
| 3119 | 19 | 3 | -1.050000 | 1.606455513  | -22.773649320 | 1.033631378  | 0 | 0 | 1 | # | ob  |
| 3120 | 19 | 3 | -1.050000 | 5.023189092  | -26.314939700 | -3.233079711 | 0 | 0 | 1 | # | ob  |
| 3121 | 19 | 3 | -1.050000 | 1.607035345  | -26.132051481 | 1.033422068  | 0 | 0 | 1 | # | ob  |
| 3122 | 19 | 3 | -1.050000 | 2.741532736  | -21.850546126 | 3.231846262  | 0 | 0 | 1 | # | ob  |
| 3123 | 19 | 3 | -1.050000 | 4.195385345  | -21.677501481 | 1.033422068  | 0 | 0 | 1 | # | ob  |
| 3124 | 19 | 3 | -1.050000 | 0.153182736  | -26.305096126 | 3.231846262  | 0 | 0 | 1 | # | ob  |
| 3125 | 19 | 3 | -1.050000 | 2.741860908  | -27.048710300 | 3.233079711  | 0 | 0 | 1 | # | ob  |
| 3126 | 19 | 6 | -0.950000 | 1.999257657  | 26.728240996  | 1.012582885  | 0 | 0 | 1 | # | oh  |
| 3127 | 19 | 3 | -1.050000 | 4.667081651  | 26.731276970  | 3.061482417  | 0 | 0 | 1 | # | ob  |
| 3128 | 19 | 6 | -0.950000 | 4.587607657  | -24.453609004 | 1.012582885  | 0 | 0 | 1 | # | oh  |
| 3129 | 19 | 3 | -1.050000 | 2.078731651  | -24.450573030 | 3.061482417  | 0 | 0 | 1 | # | ob  |
| 3130 | 19 | 4 | -0.950000 | 3.177442343  | -20.000940996 | -1.012582885 | 0 | 0 | 1 | # | oh  |
| 3131 | 19 | 5 | -0.950000 | 0.509618349  | -20.003976970 | -3.061482417 | 0 | 0 | 1 | # | oht |
| 3132 | 19 | 6 | -0.950000 | 0.589092343  | -24.455490996 | -1.012582885 | 0 | 0 | 1 | # | oh  |
| 3133 | 19 | 3 | -1.050000 | 3.097968349  | -24.458526970 | -3.061482417 | 0 | 0 | 1 | # | ob  |
| 3134 | 19 | 3 | -1.050000 | 4.194805513  | -27.228199320 | 1.033631378  | 0 | 0 | 1 | # | ob  |
| 3135 | 19 | 3 | -1.050000 | 0.153510908  | -22.594160300 | 3.233079711  | 0 | 0 | 1 | # | ob  |
| 3136 | 19 | 3 | -1.050000 | 3.569664655  | -22.777048519 | -1.033422068 | 0 | 0 | 1 | # | ob  |
| 3137 | 19 | 3 | -1.050000 | 2.435167264  | -27.058553874 | -3.231846262 | 0 | 0 | 1 | # | ob  |
| 3138 | 19 | 7 | 2.100000  | 4.222997014  | -27.381980796 | 2.662777170  | 0 | 0 | 1 | # | st  |
| 3139 | 19 | 7 | 2.100000  | 3.542027774  | -22.935729218 | -2.661798097 | 0 | 0 | 1 | # | st  |
| 3140 | 19 | 7 | 2.100000  | 0.953702986  | -21.527119204 | -2.662777170 | 0 | 0 | 1 | # | st  |
| 3141 | 19 | 7 | 2.100000  | 3.542052986  | -25.981669204 | -2.662777170 | 0 | 0 | 1 | # | st  |
| 3142 | 19 | 7 | 2.100000  | 4.223022226  | -21.518820782 | 2.661798097  | 0 | 0 | 1 | # | st  |
| 3143 | 19 | 7 | 2.100000  | 1.634672226  | -25.973370782 | 2.661798097  | 0 | 0 | 1 | # | st  |
| 3144 | 19 | 7 | 2.100000  | 1.634647014  | -22.927430796 | 2.662777170  | 0 | 0 | 1 | # | st  |
| 3145 | 19 | 7 | 2.100000  | 0.953677774  | -27.390279218 | -2.661798097 | 0 | 0 | 1 | # | st  |
| 3146 | 20 | 1 | 1.575000  | 7.765255029  | 1.474661568   | 0.000270632  | 0 | 0 | 1 | # | ao  |
| 3147 | 20 | 1 | 1.575000  | 5.176905029  | 5.929211568   | 0.000270632  | 0 | 0 | 1 | # | ao  |
| 3148 | 20 | 1 | 1.575000  | 7.764844971  | 7.434438432   | -0.000270632 | 0 | 0 | 1 | # | ao  |
| 3149 | 20 | 1 | 1.575000  | 10.353194971 | 2.979888432   | -0.000270632 | 0 | 0 | 1 | # | ao  |
| 3150 | 20 | 2 | 0.425000  | 8.911350872  | 4.457267322   | 1.486115063  | 0 | 0 | 1 | # | ho  |
| 3151 | 20 | 2 | 0.425000  | 6.323000872  | 0.002717322   | 1.486115063  | 0 | 0 | 1 | # | ho  |
| 3152 | 20 | 2 | 0.425000  | 6.618749128  | 4.451832678   | -1.486115063 | 0 | 0 | 1 | # | ho  |
| 3153 | 20 | 2 | 0.425000  | 9.207099128  | 8.906382678   | -1.486115063 | 0 | 0 | 1 | # | ho  |
| 3154 | 20 | 3 | -1.050000 | 6.158014655  | 1.677501481   | -1.033422068 | 0 | 0 | 1 | # | ob  |
| 3155 | 20 | 3 | -1.050000 | 10.200217264 | 6.305096126   | -3.231846262 | 0 | 0 | 1 | # | ob  |
| 3156 | 20 | 3 | -1.050000 | 8.746944487  | 2.773649320   | -1.033631378 | 0 | 0 | 1 | # | ob  |
| 3157 | 20 | 3 | -1.050000 | 7.611539092  | 7.048710300   | -3.233079711 | 0 | 0 | 1 | # | ob  |
| 3158 | 20 | 3 | -1.050000 | 6.158594487  | 7.228199320   | -1.033631378 | 0 | 0 | 1 | # | ob  |
| 3159 | 20 | 3 | -1.050000 | 6.783155513  | 6.135450680   | 1.033631378  | 0 | 0 | 1 | # | ob  |
| 3160 | 20 | 3 | -1.050000 | 10.199889092 | 2.594160300   | -3.233079711 | 0 | 0 | 1 | # | ob  |
| 3161 | 20 | 3 | -1.050000 | 6.783735345  | 2.777048519   | 1.033422068  | 0 | 0 | 1 | # | ob  |
| 3162 | 20 | 3 | -1.050000 | 7.918232736  | 7.058553874   | 3.231846262  | 0 | 0 | 1 | # | ob  |
| 3163 | 20 | 3 | -1.050000 | 9.372085345  | 7.231598519   | 1.033422068  | 0 | 0 | 1 | # | ob  |
| 3164 | 20 | 3 | -1.050000 | 5.329882736  | 2.604003874   | 3.231846262  | 0 | 0 | 1 | # | ob  |
| 3165 | 20 | 3 | -1.050000 | 7.918560908  | 1.860389700   | 3.233079711  | 0 | 0 | 1 | # | ob  |
| 3166 | 20 | 4 | -0.950000 | 7.175957657  | 0.000940996   | 1.012582885  | 0 | 0 | 1 | # | oh  |
| 3167 | 20 | 5 | -0.950000 | 9.843781651  | 0.003976970   | 3.061482417  | 0 | 0 | 1 | # | oht |
| 3168 | 20 | 6 | -0.950000 | 9.764307657  | 4.455490996   | 1.012582885  | 0 | 0 | 1 | # | oh  |
| 3169 | 20 | 3 | -1.050000 | 7.255431651  | 4.458526970   | 3.061482417  | 0 | 0 | 1 | # | ob  |
| 3170 | 20 | 6 | -0.950000 | 8.354142343  | 8.908159004   | -1.012582885 | 0 | 0 | 1 | # | oh  |
| 3171 | 20 | 3 | -1.050000 | 5.686318349  | 8.905123030   | -3.061482417 | 0 | 0 | 1 | # | ob  |
| 3172 | 20 | 6 | -0.950000 | 5.765792343  | 4.453609004   | -1.012582885 | 0 | 0 | 1 | # | oh  |
| 3173 | 20 | 3 | -1.050000 | 8.274668349  | 4.450573030   | -3.061482417 | 0 | 0 | 1 | # | ob  |
| 3174 | 20 | 3 | -1.050000 | 9.371505513  | 1.680900680   | 1.033631378  | 0 | 0 | 1 | # | ob  |
| 3175 | 20 | 3 | -1.050000 | 5.330210908  | 6.314939700   | 3.233079711  | 0 | 0 | 1 | # | ob  |
| 3176 | 20 | 3 | -1.050000 | 8.746364655  | 6.132051481   | -1.033422068 | 0 | 0 | 1 | # | ob  |
| 3177 | 20 | 3 | -1.050000 | 7.611867264  | 1.850546126   | -3.231846262 | 0 | 0 | 1 | # | ob  |
| 3178 | 20 | 7 | 2.100000  | 9.399697014  | 1.527119204   | 2.662777170  | 0 | 0 | 1 | # | st  |
| 3179 | 20 | 7 | 2.100000  | 8.718727774  | 5.973370782   | -2.661798097 | 0 | 0 | 1 | # | st  |
| 3180 | 20 | 7 | 2.100000  | 6.130402986  | 7.381980796   | -2.662777170 | 0 | 0 | 1 | # | st  |
| 3181 | 20 | 7 | 2.100000  | 8.718752986  | 2.927430796   | -2.662777170 | 0 | 0 | 1 | # | st  |
| 3182 | 20 | 7 | 2.100000  | 9.399722226  | 7.390279218   | 2.661798097  | 0 | 0 | 1 | # | st  |
| 3183 | 20 | 7 | 2.100000  | 6.811372226  | 2.935729218   | 2.661798097  | 0 | 0 | 1 | # | st  |
| 3184 | 20 | 7 | 2.100000  | 6.811347014  | 5.981669204   | 2.662777170  | 0 | 0 | 1 | # | st  |
| 3185 | 20 | 7 | 2.100000  | 6.130377774  | 1.518820782   | -2.661798097 | 0 | 0 | 1 | # | st  |
| 3186 | 20 | 1 | 1.575000  | 7.765255029  | 10.383761568  | 0.000270632  | 0 | 0 | 1 | # | ao  |
| 3187 | 20 | 1 | 1.575000  | 5.176905029  | 14.838311568  | 0.000270632  | 0 | 0 | 1 | # | ao  |
| 3188 | 20 | 1 | 1.575000  | 7.764844971  | 16.343538432  | -0.000270632 | 0 | 0 | 1 | # | ao  |
| 3189 | 20 | 1 | 1.575000  | 10.353194971 | 11.888988432  | -0.000270632 | 0 | 0 | 1 | # | ao  |
| 3190 | 20 | 2 | 0.425000  | 8.911350872  | 13.366367322  | 1.486115063  | 0 | 0 | 1 | # | ho  |
| 3191 | 20 | 2 | 0.425000  | 6.323000872  | 8.911817322   | 1.486115063  | 0 | 0 | 1 | # | ho  |

|      |    |   |           |              |               |              |   |   |   |   |    |
|------|----|---|-----------|--------------|---------------|--------------|---|---|---|---|----|
| 3192 | 20 | 2 | 0.425000  | 6.618749128  | 13.360932678  | -1.486115063 | 0 | 0 | 1 | # | ho |
| 3193 | 20 | 2 | 0.425000  | 9.207099128  | 17.815482678  | -1.486115063 | 0 | 0 | 1 | # | ho |
| 3194 | 20 | 3 | -1.050000 | 6.158014655  | 10.586601481  | -1.033422068 | 0 | 0 | 1 | # | ob |
| 3195 | 20 | 3 | -1.050000 | 10.200217264 | 15.214196126  | -3.231846262 | 0 | 0 | 1 | # | ob |
| 3196 | 20 | 3 | -1.050000 | 8.746944487  | 11.682749320  | -1.033631378 | 0 | 0 | 1 | # | ob |
| 3197 | 20 | 3 | -1.050000 | 7.611539092  | 15.957810300  | -3.233079711 | 0 | 0 | 1 | # | ob |
| 3198 | 20 | 3 | -1.050000 | 6.158594487  | 16.137299320  | -1.033631378 | 0 | 0 | 1 | # | ob |
| 3199 | 20 | 3 | -1.050000 | 6.783155513  | 15.044550680  | 1.033631378  | 0 | 0 | 1 | # | ob |
| 3200 | 20 | 3 | -1.050000 | 10.199889092 | 11.503260300  | -3.233079711 | 0 | 0 | 1 | # | ob |
| 3201 | 20 | 3 | -1.050000 | 6.783735345  | 11.686148519  | 1.033422068  | 0 | 0 | 1 | # | ob |
| 3202 | 20 | 3 | -1.050000 | 7.918232736  | 15.967653874  | 3.231846262  | 0 | 0 | 1 | # | ob |
| 3203 | 20 | 3 | -1.050000 | 9.372085345  | 16.140698519  | 1.033422068  | 0 | 0 | 1 | # | ob |
| 3204 | 20 | 3 | -1.050000 | 5.329882736  | 11.513103874  | 3.231846262  | 0 | 0 | 1 | # | ob |
| 3205 | 20 | 3 | -1.050000 | 7.918560908  | 10.769489700  | 3.233079711  | 0 | 0 | 1 | # | ob |
| 3206 | 20 | 6 | -0.950000 | 7.175957657  | 8.910040996   | 1.012582885  | 0 | 0 | 1 | # | oh |
| 3207 | 20 | 3 | -1.050000 | 9.843781651  | 8.913076970   | 3.061482417  | 0 | 0 | 1 | # | ob |
| 3208 | 20 | 6 | -0.950000 | 9.764307657  | 13.364590996  | 1.012582885  | 0 | 0 | 1 | # | oh |
| 3209 | 20 | 3 | -1.050000 | 7.255431651  | 13.367626970  | 3.061482417  | 0 | 0 | 1 | # | ob |
| 3210 | 20 | 6 | -0.950000 | 8.354142343  | 17.817259004  | -1.012582885 | 0 | 0 | 1 | # | oh |
| 3211 | 20 | 3 | -1.050000 | 5.686318349  | 17.814223030  | -3.061482417 | 0 | 0 | 1 | # | ob |
| 3212 | 20 | 6 | -0.950000 | 5.765792343  | 13.362709004  | -1.012582885 | 0 | 0 | 1 | # | oh |
| 3213 | 20 | 3 | -1.050000 | 8.274668349  | 13.359673030  | -3.061482417 | 0 | 0 | 1 | # | ob |
| 3214 | 20 | 3 | -1.050000 | 9.371505513  | 10.590000680  | 1.033631378  | 0 | 0 | 1 | # | ob |
| 3215 | 20 | 3 | -1.050000 | 5.330210908  | 15.224039700  | 3.233079711  | 0 | 0 | 1 | # | ob |
| 3216 | 20 | 3 | -1.050000 | 8.746364655  | 15.041151481  | -1.033422068 | 0 | 0 | 1 | # | ob |
| 3217 | 20 | 3 | -1.050000 | 7.611867264  | 10.759646126  | -3.231846262 | 0 | 0 | 1 | # | ob |
| 3218 | 20 | 7 | 2.100000  | 9.399697014  | 10.436219204  | 2.662777170  | 0 | 0 | 1 | # | st |
| 3219 | 20 | 7 | 2.100000  | 8.718727774  | 14.882470782  | -2.661798097 | 0 | 0 | 1 | # | st |
| 3220 | 20 | 7 | 2.100000  | 6.130402986  | 16.291080796  | -2.662777170 | 0 | 0 | 1 | # | st |
| 3221 | 20 | 7 | 2.100000  | 8.718752986  | 11.836530796  | -2.662777170 | 0 | 0 | 1 | # | st |
| 3222 | 20 | 7 | 2.100000  | 9.399722226  | 16.299379218  | 2.661798097  | 0 | 0 | 1 | # | st |
| 3223 | 20 | 7 | 2.100000  | 6.811372226  | 11.844829218  | 2.661798097  | 0 | 0 | 1 | # | st |
| 3224 | 20 | 7 | 2.100000  | 6.811347014  | 14.890769204  | 2.662777170  | 0 | 0 | 1 | # | st |
| 3225 | 20 | 7 | 2.100000  | 6.130377774  | 10.427920782  | -2.661798097 | 0 | 0 | 1 | # | st |
| 3226 | 20 | 1 | 1.575000  | 7.765255029  | 19.292861568  | 0.000270632  | 0 | 0 | 1 | # | ao |
| 3227 | 20 | 1 | 1.575000  | 5.176905029  | 23.747411568  | 0.000270632  | 0 | 0 | 1 | # | ao |
| 3228 | 20 | 1 | 1.575000  | 7.764844971  | 25.252638432  | -0.000270632 | 0 | 0 | 1 | # | ao |
| 3229 | 20 | 1 | 1.575000  | 10.353194971 | 20.798088432  | -0.000270632 | 0 | 0 | 1 | # | ao |
| 3230 | 20 | 2 | 0.425000  | 8.911350872  | 22.275467322  | 1.486115063  | 0 | 0 | 1 | # | ho |
| 3231 | 20 | 2 | 0.425000  | 6.323000872  | 17.820917322  | 1.486115063  | 0 | 0 | 1 | # | ho |
| 3232 | 20 | 2 | 0.425000  | 6.618749128  | 22.270032678  | -1.486115063 | 0 | 0 | 1 | # | ho |
| 3233 | 20 | 2 | 0.425000  | 9.207099128  | 26.724582678  | -1.486115063 | 0 | 0 | 1 | # | ho |
| 3234 | 20 | 3 | -1.050000 | 6.158014655  | 19.495701481  | -1.033422068 | 0 | 0 | 1 | # | ob |
| 3235 | 20 | 3 | -1.050000 | 10.200217264 | 24.123296126  | -3.231846262 | 0 | 0 | 1 | # | ob |
| 3236 | 20 | 3 | -1.050000 | 8.746944487  | 20.591849320  | -1.033631378 | 0 | 0 | 1 | # | ob |
| 3237 | 20 | 3 | -1.050000 | 7.611539092  | 24.866910300  | -3.233079711 | 0 | 0 | 1 | # | ob |
| 3238 | 20 | 3 | -1.050000 | 6.158594487  | 25.046399320  | -1.033631378 | 0 | 0 | 1 | # | ob |
| 3239 | 20 | 3 | -1.050000 | 6.783155513  | 23.953650680  | 1.033631378  | 0 | 0 | 1 | # | ob |
| 3240 | 20 | 3 | -1.050000 | 10.199889092 | 20.412360300  | -3.233079711 | 0 | 0 | 1 | # | ob |
| 3241 | 20 | 3 | -1.050000 | 6.783735345  | 20.595248519  | 1.033422068  | 0 | 0 | 1 | # | ob |
| 3242 | 20 | 3 | -1.050000 | 7.918232736  | 24.876753874  | 3.231846262  | 0 | 0 | 1 | # | ob |
| 3243 | 20 | 3 | -1.050000 | 9.372085345  | 25.049798519  | 1.033422068  | 0 | 0 | 1 | # | ob |
| 3244 | 20 | 3 | -1.050000 | 5.329882736  | 20.422203874  | 3.231846262  | 0 | 0 | 1 | # | ob |
| 3245 | 20 | 3 | -1.050000 | 7.918560908  | 19.678589700  | 3.233079711  | 0 | 0 | 1 | # | ob |
| 3246 | 20 | 6 | -0.950000 | 7.175957657  | 17.819140996  | 1.012582885  | 0 | 0 | 1 | # | oh |
| 3247 | 20 | 3 | -1.050000 | 9.843781651  | 17.822176970  | 3.061482417  | 0 | 0 | 1 | # | ob |
| 3248 | 20 | 6 | -0.950000 | 9.764307657  | 22.273690996  | 1.012582885  | 0 | 0 | 1 | # | oh |
| 3249 | 20 | 3 | -1.050000 | 7.255431651  | 22.276726970  | 3.061482417  | 0 | 0 | 1 | # | ob |
| 3250 | 20 | 6 | -0.950000 | 8.354142343  | 26.726359004  | -1.012582885 | 0 | 0 | 1 | # | oh |
| 3251 | 20 | 3 | -1.050000 | 5.686318349  | 26.723323030  | -3.061482417 | 0 | 0 | 1 | # | ob |
| 3252 | 20 | 6 | -0.950000 | 5.765792343  | 22.271809004  | -1.012582885 | 0 | 0 | 1 | # | oh |
| 3253 | 20 | 3 | -1.050000 | 8.274668349  | 22.268773030  | -3.061482417 | 0 | 0 | 1 | # | ob |
| 3254 | 20 | 3 | -1.050000 | 9.371505513  | 19.499100680  | 1.033631378  | 0 | 0 | 1 | # | ob |
| 3255 | 20 | 3 | -1.050000 | 5.330210908  | 24.133139700  | 3.233079711  | 0 | 0 | 1 | # | ob |
| 3256 | 20 | 3 | -1.050000 | 8.746364655  | 23.950251481  | -1.033422068 | 0 | 0 | 1 | # | ob |
| 3257 | 20 | 3 | -1.050000 | 7.611867264  | 19.668746126  | -3.231846262 | 0 | 0 | 1 | # | ob |
| 3258 | 20 | 7 | 2.100000  | 9.399697014  | 19.345319204  | 2.662777170  | 0 | 0 | 1 | # | st |
| 3259 | 20 | 7 | 2.100000  | 8.718727774  | 23.791570782  | -2.661798097 | 0 | 0 | 1 | # | st |
| 3260 | 20 | 7 | 2.100000  | 6.130402986  | 25.200180796  | -2.662777170 | 0 | 0 | 1 | # | st |
| 3261 | 20 | 7 | 2.100000  | 8.718752986  | 20.745630796  | -2.662777170 | 0 | 0 | 1 | # | st |
| 3262 | 20 | 7 | 2.100000  | 9.399722226  | 25.208479218  | 2.661798097  | 0 | 0 | 1 | # | st |
| 3263 | 20 | 7 | 2.100000  | 6.811372226  | 20.753929218  | 2.661798097  | 0 | 0 | 1 | # | st |
| 3264 | 20 | 7 | 2.100000  | 6.811347014  | 23.799869204  | 2.662777170  | 0 | 0 | 1 | # | st |
| 3265 | 20 | 7 | 2.100000  | 6.130377774  | 19.337020782  | -2.661798097 | 0 | 0 | 1 | # | st |
| 3266 | 20 | 1 | 1.575000  | 7.765255029  | -27.434438432 | 0.000270632  | 0 | 1 | 1 | # | ao |
| 3267 | 20 | 1 | 1.575000  | 5.176905029  | -22.979888432 | 0.000270632  | 0 | 1 | 1 | # | ao |
| 3268 | 20 | 1 | 1.575000  | 7.764844971  | -21.474661568 | -0.000270632 | 0 | 1 | 1 | # | ao |
| 3269 | 20 | 1 | 1.575000  | 10.353194971 | -25.929211568 | -0.000270632 | 0 | 1 | 1 | # | ao |
| 3270 | 20 | 2 | 0.425000  | 8.911350872  | -24.451832678 | 1.486115063  | 0 | 1 | 1 | # | ho |
| 3271 | 20 | 2 | 0.425000  | 6.323000872  | 26.730017322  | 1.486115063  | 0 | 1 | 1 | # | ho |
| 3272 | 20 | 2 | 0.425000  | 6.618749128  | -24.457267322 | -1.486115063 | 0 | 1 | 1 | # | ho |
| 3273 | 20 | 2 | 0.425000  | 9.207099128  | -20.002717322 | -1.486115063 | 0 | 1 | 1 | # | ho |
| 3274 | 20 | 3 | -1.050000 | 6.158014655  | -27.231598519 | -1.033422068 | 0 | 1 | 1 | # | ob |
| 3275 | 20 | 3 | -1.050000 | 10.200217264 | -22.604003874 | -3.231846262 | 0 | 1 | 1 | # | ob |
| 3276 | 20 | 3 | -1.050000 | 8.746944487  | -26.135450680 | -1.033631378 | 0 | 1 | 1 | # | ob |
| 3277 | 20 | 3 | -1.050000 | 7.611539092  | -21.860389700 | -3.233079711 | 0 | 1 | 1 | # | ob |
| 3278 | 20 | 3 | -1.050000 | 6.158594487  | -21.680900680 | -1.033631378 | 0 | 1 | 1 | # | ob |
| 3279 | 20 | 3 | -1.050000 | 6.783155513  | -22.773649320 | 1.033631378  | 0 | 1 | 1 | # | ob |
| 3280 | 20 | 3 | -1.050000 | 10.199889092 | -26.314939700 | -3.233079711 | 0 | 1 | 1 | # | ob |
| 3281 | 20 | 3 | -1.050000 | 6.783735345  | -26.132051481 | 1.033422068  | 0 | 1 | 1 | # | ob |
| 3282 | 20 | 3 | -1.050000 | 7.918232736  | -21.850546126 | 3.231846262  | 0 | 1 | 1 | # | ob |
| 3283 | 20 | 3 | -1.050000 | 9.372085345  | -21.677501481 | 1.033422068  | 0 | 1 | 1 | # | ob |
| 3284 | 20 | 3 | -1.050000 | 5.329882736  | -26.305096126 | 3.231846262  | 0 | 1 | 1 | # | ob |

|      |    |   |           |              |               |              |   |   |   |   |     |
|------|----|---|-----------|--------------|---------------|--------------|---|---|---|---|-----|
| 3285 | 20 | 3 | -1.050000 | 7.918560908  | -27.048710300 | 3.233079711  | 0 | 1 | 1 | # | ob  |
| 3286 | 20 | 6 | -0.950000 | 7.175957657  | 26.728240996  | 1.012582885  | 0 | 0 | 1 | # | oh  |
| 3287 | 20 | 3 | -1.050000 | 9.843781651  | 26.731276970  | 3.061482417  | 0 | 0 | 1 | # | ob  |
| 3288 | 20 | 6 | -0.950000 | 9.764307657  | -24.453609004 | 1.012582885  | 0 | 1 | 1 | # | oh  |
| 3289 | 20 | 3 | -1.050000 | 7.255431651  | -24.450573030 | 3.061482417  | 0 | 1 | 1 | # | ob  |
| 3290 | 20 | 4 | -0.950000 | 8.354142343  | -20.000940996 | -1.012582885 | 0 | 1 | 1 | # | oho |
| 3291 | 20 | 5 | -0.950000 | 5.686318349  | -20.003976970 | -3.061482417 | 0 | 1 | 1 | # | oht |
| 3292 | 20 | 6 | -0.950000 | 5.765792343  | -24.455490996 | -1.012582885 | 0 | 1 | 1 | # | oh  |
| 3293 | 20 | 3 | -1.050000 | 8.274668349  | -24.458526970 | -3.061482417 | 0 | 1 | 1 | # | ob  |
| 3294 | 20 | 3 | -1.050000 | 9.371505513  | -27.228199320 | 1.033631378  | 0 | 1 | 1 | # | ob  |
| 3295 | 20 | 3 | -1.050000 | 5.330210908  | -22.594160300 | 3.233079711  | 0 | 1 | 1 | # | ob  |
| 3296 | 20 | 3 | -1.050000 | 8.746364655  | -22.777048519 | -1.033422068 | 0 | 1 | 1 | # | ob  |
| 3297 | 20 | 3 | -1.050000 | 7.611867264  | -27.058553874 | -3.231846262 | 0 | 1 | 1 | # | ob  |
| 3298 | 20 | 7 | 2.100000  | 9.399697014  | -27.381980796 | 2.662777170  | 0 | 1 | 1 | # | st  |
| 3299 | 20 | 7 | 2.100000  | 8.718727774  | -22.935729218 | -2.661798097 | 0 | 1 | 1 | # | st  |
| 3300 | 20 | 7 | 2.100000  | 6.130402986  | -21.527119204 | -2.662777170 | 0 | 1 | 1 | # | st  |
| 3301 | 20 | 7 | 2.100000  | 8.718752986  | -25.981669204 | -2.662777170 | 0 | 1 | 1 | # | st  |
| 3302 | 20 | 7 | 2.100000  | 9.399722226  | -21.518820782 | 2.661798097  | 0 | 1 | 1 | # | st  |
| 3303 | 20 | 7 | 2.100000  | 6.811372226  | -25.973370782 | 2.661798097  | 0 | 1 | 1 | # | st  |
| 3304 | 20 | 7 | 2.100000  | 6.811347014  | -22.927430796 | 2.662777170  | 0 | 1 | 1 | # | st  |
| 3305 | 20 | 7 | 2.100000  | 6.130377774  | -27.390279218 | -2.661798097 | 0 | 1 | 1 | # | st  |
| 3306 | 21 | 1 | 1.575000  | 12.941955029 | 1.474661568   | 0.000270632  | 0 | 0 | 1 | # | ao  |
| 3307 | 21 | 1 | 1.575000  | 10.353605029 | 5.929211568   | 0.000270632  | 0 | 0 | 1 | # | ao  |
| 3308 | 21 | 1 | 1.575000  | 12.941544971 | 7.434438432   | -0.000270632 | 0 | 0 | 1 | # | ao  |
| 3309 | 21 | 1 | 1.575000  | 15.529894971 | 2.979888432   | -0.000270632 | 0 | 0 | 1 | # | ao  |
| 3310 | 21 | 2 | 0.425000  | 14.088050872 | 4.457267322   | 1.486115063  | 0 | 0 | 1 | # | ho  |
| 3311 | 21 | 2 | 0.425000  | 11.499700872 | 0.002717322   | 1.486115063  | 0 | 0 | 1 | # | ho  |
| 3312 | 21 | 2 | 0.425000  | 11.795449128 | 4.451832678   | -1.486115063 | 0 | 0 | 1 | # | ho  |
| 3313 | 21 | 2 | 0.425000  | 14.383799128 | 8.906382678   | -1.486115063 | 0 | 0 | 1 | # | ho  |
| 3314 | 21 | 3 | -1.050000 | 11.334714655 | 1.677501481   | -1.033422068 | 0 | 0 | 1 | # | ob  |
| 3315 | 21 | 3 | -1.050000 | 15.376917264 | 6.305096126   | -3.231846262 | 0 | 0 | 1 | # | ob  |
| 3316 | 21 | 3 | -1.050000 | 13.923644487 | 2.773649320   | -1.033631378 | 0 | 0 | 1 | # | ob  |
| 3317 | 21 | 3 | -1.050000 | 12.788239092 | 7.048710300   | -3.233079711 | 0 | 0 | 1 | # | ob  |
| 3318 | 21 | 3 | -1.050000 | 11.335294487 | 7.228199320   | -1.033631378 | 0 | 0 | 1 | # | ob  |
| 3319 | 21 | 3 | -1.050000 | 11.959855513 | 6.135450680   | 1.033631378  | 0 | 0 | 1 | # | ob  |
| 3320 | 21 | 3 | -1.050000 | 15.376589092 | 2.594160300   | -3.233079711 | 0 | 0 | 1 | # | ob  |
| 3321 | 21 | 3 | -1.050000 | 11.960435345 | 2.777048519   | 1.033422068  | 0 | 0 | 1 | # | ob  |
| 3322 | 21 | 3 | -1.050000 | 13.094932736 | 7.058553874   | 3.231846262  | 0 | 0 | 1 | # | ob  |
| 3323 | 21 | 3 | -1.050000 | 14.548785345 | 7.231598519   | 1.033422068  | 0 | 0 | 1 | # | ob  |
| 3324 | 21 | 3 | -1.050000 | 10.506582736 | 2.604003874   | 3.231846262  | 0 | 0 | 1 | # | ob  |
| 3325 | 21 | 3 | -1.050000 | 13.095260908 | 1.860389700   | 3.233079711  | 0 | 0 | 1 | # | ob  |
| 3326 | 21 | 4 | -0.950000 | 12.352657657 | 0.000940996   | 1.012582885  | 0 | 0 | 1 | # | oho |
| 3327 | 21 | 5 | -0.950000 | 15.020481651 | 0.003976970   | 3.061482417  | 0 | 0 | 1 | # | oht |
| 3328 | 21 | 6 | -0.950000 | 14.941007657 | 4.455490996   | 1.012582885  | 0 | 0 | 1 | # | oh  |
| 3329 | 21 | 3 | -1.050000 | 12.432131651 | 4.458526970   | 3.061482417  | 0 | 0 | 1 | # | ob  |
| 3330 | 21 | 6 | -0.950000 | 13.530842343 | 8.908159004   | -1.012582885 | 0 | 0 | 1 | # | oh  |
| 3331 | 21 | 3 | -1.050000 | 10.863018349 | 8.905123030   | -3.061482417 | 0 | 0 | 1 | # | ob  |
| 3332 | 21 | 6 | -0.950000 | 10.942492343 | 4.453609004   | -1.012582885 | 0 | 0 | 1 | # | oh  |
| 3333 | 21 | 3 | -1.050000 | 13.451368349 | 4.450573030   | -3.061482417 | 0 | 0 | 1 | # | ob  |
| 3334 | 21 | 3 | -1.050000 | 14.548205513 | 1.680900680   | 1.033631378  | 0 | 0 | 1 | # | ob  |
| 3335 | 21 | 3 | -1.050000 | 10.506910908 | 6.314939700   | 3.233079711  | 0 | 0 | 1 | # | ob  |
| 3336 | 21 | 3 | -1.050000 | 13.923064655 | 6.132051481   | -1.033422068 | 0 | 0 | 1 | # | ob  |
| 3337 | 21 | 3 | -1.050000 | 12.788567264 | 1.850546126   | -3.231846262 | 0 | 0 | 1 | # | ob  |
| 3338 | 21 | 7 | 2.100000  | 14.576397014 | 1.527119204   | 2.662777170  | 0 | 0 | 1 | # | st  |
| 3339 | 21 | 7 | 2.100000  | 13.895427774 | 5.973370782   | -2.661798097 | 0 | 0 | 1 | # | st  |
| 3340 | 21 | 7 | 2.100000  | 11.307102986 | 7.381980796   | -2.662777170 | 0 | 0 | 1 | # | st  |
| 3341 | 21 | 7 | 2.100000  | 13.895452986 | 2.927430796   | -2.662777170 | 0 | 0 | 1 | # | st  |
| 3342 | 21 | 7 | 2.100000  | 14.576422226 | 7.390279218   | 2.661798097  | 0 | 0 | 1 | # | st  |
| 3343 | 21 | 7 | 2.100000  | 11.988072226 | 2.935729218   | 2.661798097  | 0 | 0 | 1 | # | st  |
| 3344 | 21 | 7 | 2.100000  | 11.988047014 | 5.981669204   | 2.662777170  | 0 | 0 | 1 | # | st  |
| 3345 | 21 | 7 | 2.100000  | 11.307077774 | 1.518820782   | -2.661798097 | 0 | 0 | 1 | # | st  |
| 3346 | 21 | 1 | 1.575000  | 12.941955029 | 10.383761568  | 0.000270632  | 0 | 0 | 1 | # | ao  |
| 3347 | 21 | 1 | 1.575000  | 10.353605029 | 14.838311568  | 0.000270632  | 0 | 0 | 1 | # | ao  |
| 3348 | 21 | 1 | 1.575000  | 12.941544971 | 16.343538432  | -0.000270632 | 0 | 0 | 1 | # | ao  |
| 3349 | 21 | 1 | 1.575000  | 15.529894971 | 11.889888432  | -0.000270632 | 0 | 0 | 1 | # | ao  |
| 3350 | 21 | 2 | 0.425000  | 14.088050872 | 13.366367322  | 1.486115063  | 0 | 0 | 1 | # | ho  |
| 3351 | 21 | 2 | 0.425000  | 11.499700872 | 8.911817322   | 1.486115063  | 0 | 0 | 1 | # | ho  |
| 3352 | 21 | 2 | 0.425000  | 11.795449128 | 13.360932678  | -1.486115063 | 0 | 0 | 1 | # | ho  |
| 3353 | 21 | 2 | 0.425000  | 14.383799128 | 17.815482678  | -1.486115063 | 0 | 0 | 1 | # | ho  |
| 3354 | 21 | 3 | -1.050000 | 11.334714655 | 10.586601481  | -1.033422068 | 0 | 0 | 1 | # | ob  |
| 3355 | 21 | 3 | -1.050000 | 15.376917264 | 15.214196126  | -3.231846262 | 0 | 0 | 1 | # | ob  |
| 3356 | 21 | 3 | -1.050000 | 13.923644487 | 11.682749320  | -1.033631378 | 0 | 0 | 1 | # | ob  |
| 3357 | 21 | 3 | -1.050000 | 12.788239092 | 15.957810300  | -3.233079711 | 0 | 0 | 1 | # | ob  |
| 3358 | 21 | 3 | -1.050000 | 11.335294487 | 16.137299320  | -1.033631378 | 0 | 0 | 1 | # | ob  |
| 3359 | 21 | 3 | -1.050000 | 11.959855513 | 15.044550680  | 1.033631378  | 0 | 0 | 1 | # | ob  |
| 3360 | 21 | 3 | -1.050000 | 15.376589092 | 11.503260300  | -3.233079711 | 0 | 0 | 1 | # | ob  |
| 3361 | 21 | 3 | -1.050000 | 11.960435345 | 11.686148519  | 1.033422068  | 0 | 0 | 1 | # | ob  |
| 3362 | 21 | 3 | -1.050000 | 13.094932736 | 15.967653874  | 3.231846262  | 0 | 0 | 1 | # | ob  |
| 3363 | 21 | 3 | -1.050000 | 14.548785345 | 16.140698519  | 1.033422068  | 0 | 0 | 1 | # | ob  |
| 3364 | 21 | 3 | -1.050000 | 10.506582736 | 11.513103874  | 3.231846262  | 0 | 0 | 1 | # | ob  |
| 3365 | 21 | 3 | -1.050000 | 13.095260908 | 10.769489700  | 3.233079711  | 0 | 0 | 1 | # | ob  |
| 3366 | 21 | 6 | -0.950000 | 12.352657657 | 8.910040996   | 1.012582885  | 0 | 0 | 1 | # | oh  |
| 3367 | 21 | 3 | -1.050000 | 15.020481651 | 8.913076970   | 3.061482417  | 0 | 0 | 1 | # | ob  |
| 3368 | 21 | 6 | -0.950000 | 14.941007657 | 13.364590996  | 1.012582885  | 0 | 0 | 1 | # | oh  |
| 3369 | 21 | 3 | -1.050000 | 12.432131651 | 13.367626970  | 3.061482417  | 0 | 0 | 1 | # | ob  |
| 3370 | 21 | 6 | -0.950000 | 13.530842343 | 17.817259004  | -1.012582885 | 0 | 0 | 1 | # | oh  |
| 3371 | 21 | 3 | -1.050000 | 10.863018349 | 17.814223030  | -3.061482417 | 0 | 0 | 1 | # | ob  |
| 3372 | 21 | 6 | -0.950000 | 10.942492343 | 13.362709004  | -1.012582885 | 0 | 0 | 1 | # | oh  |
| 3373 | 21 | 3 | -1.050000 | 13.451368349 | 13.359673030  | -3.061482417 | 0 | 0 | 1 | # | ob  |
| 3374 | 21 | 3 | -1.050000 | 14.548205513 | 10.590000680  | 1.033631378  | 0 | 0 | 1 | # | ob  |
| 3375 | 21 | 3 | -1.050000 | 10.506910908 | 15.224039700  | 3.233079711  | 0 | 0 | 1 | # | ob  |
| 3376 | 21 | 3 | -1.050000 | 13.923064655 | 15.041151481  | -1.033422068 | 0 | 0 | 1 | # | ob  |
| 3377 | 21 | 3 | -1.050000 | 12.788567264 | 10.759646126  | -3.231846262 | 0 | 0 | 1 | # | ob  |

|      |    |   |           |               |               |              |   |   |   |   |     |
|------|----|---|-----------|---------------|---------------|--------------|---|---|---|---|-----|
| 3378 | 21 | 7 | 2.100000  | 14.576397014  | 10.436219204  | 2.662777170  | 0 | 0 | 1 | # | st  |
| 3379 | 21 | 7 | 2.100000  | 13.895427774  | 14.882470782  | -2.661798097 | 0 | 0 | 1 | # | st  |
| 3380 | 21 | 7 | 2.100000  | 11.307102986  | 16.291080796  | -2.662777170 | 0 | 0 | 1 | # | st  |
| 3381 | 21 | 7 | 2.100000  | 13.895452986  | 11.836530796  | -2.662777170 | 0 | 0 | 1 | # | st  |
| 3382 | 21 | 7 | 2.100000  | 14.576422226  | 16.299379218  | 2.661798097  | 0 | 0 | 1 | # | st  |
| 3383 | 21 | 7 | 2.100000  | 11.988072226  | 11.844829218  | 2.661798097  | 0 | 0 | 1 | # | st  |
| 3384 | 21 | 7 | 2.100000  | 11.988047014  | 14.890769204  | 2.662777170  | 0 | 0 | 1 | # | st  |
| 3385 | 21 | 7 | 2.100000  | 11.307077774  | 10.427920782  | -2.661798097 | 0 | 0 | 1 | # | st  |
| 3386 | 21 | 1 | 1.575000  | 12.941955029  | 19.292861568  | 0.000270632  | 0 | 0 | 1 | # | ao  |
| 3387 | 21 | 1 | 1.575000  | 10.353605029  | 23.747411568  | 0.000270632  | 0 | 0 | 1 | # | ao  |
| 3388 | 21 | 1 | 1.575000  | 12.941544971  | 25.252638432  | -0.000270632 | 0 | 0 | 1 | # | ao  |
| 3389 | 21 | 1 | 1.575000  | 15.529894971  | 20.798088432  | -0.000270632 | 0 | 0 | 1 | # | ao  |
| 3390 | 21 | 2 | 0.425000  | 14.088050872  | 22.275467322  | 1.486115063  | 0 | 0 | 1 | # | ho  |
| 3391 | 21 | 2 | 0.425000  | 11.499700872  | 17.820917322  | 1.486115063  | 0 | 0 | 1 | # | ho  |
| 3392 | 21 | 2 | 0.425000  | 11.795449128  | 22.270032678  | -1.486115063 | 0 | 0 | 1 | # | ho  |
| 3393 | 21 | 2 | 0.425000  | 14.383799128  | 26.724582678  | -1.486115063 | 0 | 0 | 1 | # | ho  |
| 3394 | 21 | 3 | -1.050000 | 11.334714655  | 19.495701481  | -1.033422068 | 0 | 0 | 1 | # | ob  |
| 3395 | 21 | 3 | -1.050000 | 15.376917264  | 24.123296126  | -3.231846262 | 0 | 0 | 1 | # | ob  |
| 3396 | 21 | 3 | -1.050000 | 13.923644487  | 20.591849320  | -1.033631378 | 0 | 0 | 1 | # | ob  |
| 3397 | 21 | 3 | -1.050000 | 12.788239092  | 24.866910300  | -3.233079711 | 0 | 0 | 1 | # | ob  |
| 3398 | 21 | 3 | -1.050000 | 11.335294487  | 25.046399320  | -1.033631378 | 0 | 0 | 1 | # | ob  |
| 3399 | 21 | 3 | -1.050000 | 11.959855513  | 23.953650680  | 1.033631378  | 0 | 0 | 1 | # | ob  |
| 3400 | 21 | 3 | -1.050000 | 15.376589092  | 20.412360300  | -3.233079711 | 0 | 0 | 1 | # | ob  |
| 3401 | 21 | 3 | -1.050000 | 11.960435345  | 20.595248519  | 1.033422068  | 0 | 0 | 1 | # | ob  |
| 3402 | 21 | 3 | -1.050000 | 13.094932736  | 24.876753874  | 3.231846262  | 0 | 0 | 1 | # | ob  |
| 3403 | 21 | 3 | -1.050000 | 14.548785345  | 25.049798519  | 1.033422068  | 0 | 0 | 1 | # | ob  |
| 3404 | 21 | 3 | -1.050000 | 10.506582736  | 20.422203874  | 3.231846262  | 0 | 0 | 1 | # | ob  |
| 3405 | 21 | 3 | -1.050000 | 13.095260908  | 19.678589700  | 3.233079711  | 0 | 0 | 1 | # | ob  |
| 3406 | 21 | 6 | -0.950000 | 12.352657657  | 17.819140996  | 1.012582885  | 0 | 0 | 1 | # | oh  |
| 3407 | 21 | 3 | -1.050000 | 15.020481651  | 17.822176970  | 3.061482417  | 0 | 0 | 1 | # | ob  |
| 3408 | 21 | 6 | -0.950000 | 14.941007657  | 22.273690996  | 1.012582885  | 0 | 0 | 1 | # | oh  |
| 3409 | 21 | 3 | -1.050000 | 12.432131651  | 22.276726970  | 3.061482417  | 0 | 0 | 1 | # | ob  |
| 3410 | 21 | 6 | -0.950000 | 13.530842343  | 26.726359004  | -1.012582885 | 0 | 0 | 1 | # | oh  |
| 3411 | 21 | 3 | -1.050000 | 10.863018349  | 26.723323030  | -3.061482417 | 0 | 0 | 1 | # | ob  |
| 3412 | 21 | 6 | -0.950000 | 10.942492343  | 22.271809004  | -1.012582885 | 0 | 0 | 1 | # | oh  |
| 3413 | 21 | 3 | -1.050000 | 13.451368349  | 22.268773030  | -3.061482417 | 0 | 0 | 1 | # | ob  |
| 3414 | 21 | 3 | -1.050000 | 14.548205513  | 19.499100680  | 1.033631378  | 0 | 0 | 1 | # | ob  |
| 3415 | 21 | 3 | -1.050000 | 10.506910908  | 24.133139700  | 3.233079711  | 0 | 0 | 1 | # | ob  |
| 3416 | 21 | 3 | -1.050000 | 13.923064655  | 23.950251481  | -1.033422068 | 0 | 0 | 1 | # | ob  |
| 3417 | 21 | 3 | -1.050000 | 12.788567264  | 19.668746126  | -3.231846262 | 0 | 0 | 1 | # | ob  |
| 3418 | 21 | 7 | 2.100000  | 14.576397014  | 19.345319204  | 2.662777170  | 0 | 0 | 1 | # | st  |
| 3419 | 21 | 7 | 2.100000  | 13.895427774  | 23.791570782  | -2.661798097 | 0 | 0 | 1 | # | st  |
| 3420 | 21 | 7 | 2.100000  | 11.307102986  | 25.200180796  | -2.662777170 | 0 | 0 | 1 | # | st  |
| 3421 | 21 | 7 | 2.100000  | 13.895452986  | 20.745630796  | -2.662777170 | 0 | 0 | 1 | # | st  |
| 3422 | 21 | 7 | 2.100000  | 14.576422226  | 25.208479218  | 2.661798097  | 0 | 0 | 1 | # | st  |
| 3423 | 21 | 7 | 2.100000  | 11.988072226  | 20.753929218  | 2.661798097  | 0 | 0 | 1 | # | st  |
| 3424 | 21 | 7 | 2.100000  | 11.988047014  | 23.799869204  | 2.662777170  | 0 | 0 | 1 | # | st  |
| 3425 | 21 | 7 | 2.100000  | 11.307077774  | 19.337020782  | -2.661798097 | 0 | 0 | 1 | # | st  |
| 3426 | 21 | 1 | 1.575000  | 12.941955029  | -27.434438432 | 0.000270632  | 0 | 1 | 1 | # | ao  |
| 3427 | 21 | 1 | 1.575000  | 10.353605029  | -22.979888432 | 0.000270632  | 0 | 1 | 1 | # | ao  |
| 3428 | 21 | 1 | 1.575000  | 12.941544971  | -21.474661568 | -0.000270632 | 0 | 1 | 1 | # | ao  |
| 3429 | 21 | 1 | 1.575000  | 15.529894971  | -25.929211568 | -0.000270632 | 0 | 1 | 1 | # | ao  |
| 3430 | 21 | 2 | 0.425000  | 14.088050872  | -24.451832678 | 1.486115063  | 0 | 1 | 1 | # | ho  |
| 3431 | 21 | 2 | 0.425000  | 11.499700872  | 26.730017322  | 1.486115063  | 0 | 1 | 1 | # | ho  |
| 3432 | 21 | 2 | 0.425000  | 11.795449128  | -24.457267322 | -1.486115063 | 0 | 1 | 1 | # | ho  |
| 3433 | 21 | 2 | 0.425000  | 14.383799128  | -20.002717322 | -1.486115063 | 0 | 1 | 1 | # | ho  |
| 3434 | 21 | 3 | -1.050000 | 11.334714655  | -27.231598519 | -1.033422068 | 0 | 1 | 1 | # | ob  |
| 3435 | 21 | 3 | -1.050000 | 15.376917264  | -22.604003874 | -3.231846262 | 0 | 1 | 1 | # | ob  |
| 3436 | 21 | 3 | -1.050000 | 13.923644487  | -26.135450680 | -1.033631378 | 0 | 1 | 1 | # | ob  |
| 3437 | 21 | 3 | -1.050000 | 12.788239092  | -21.860389700 | -3.233079711 | 0 | 1 | 1 | # | ob  |
| 3438 | 21 | 3 | -1.050000 | 11.335294487  | -21.680900680 | -1.033631378 | 0 | 1 | 1 | # | ob  |
| 3439 | 21 | 3 | -1.050000 | 11.959855513  | -22.773649320 | 1.033631378  | 0 | 1 | 1 | # | ob  |
| 3440 | 21 | 3 | -1.050000 | 15.376589092  | -26.314939700 | -3.233079711 | 0 | 1 | 1 | # | ob  |
| 3441 | 21 | 3 | -1.050000 | 11.960435345  | -26.132051481 | 1.033422068  | 0 | 1 | 1 | # | ob  |
| 3442 | 21 | 3 | -1.050000 | 13.094932736  | -21.850546126 | 3.231846262  | 0 | 1 | 1 | # | ob  |
| 3443 | 21 | 3 | -1.050000 | 14.548785345  | -21.677501481 | 1.033422068  | 0 | 1 | 1 | # | ob  |
| 3444 | 21 | 3 | -1.050000 | 10.506582736  | -26.305096126 | 3.231846262  | 0 | 1 | 1 | # | ob  |
| 3445 | 21 | 3 | -1.050000 | 13.095260908  | -27.048710300 | 3.233079711  | 0 | 1 | 1 | # | ob  |
| 3446 | 21 | 6 | -0.950000 | 12.352657657  | 26.728240996  | 1.012582885  | 0 | 0 | 1 | # | oh  |
| 3447 | 21 | 3 | -1.050000 | 15.020481651  | 26.731276970  | 3.061482417  | 0 | 0 | 1 | # | ob  |
| 3448 | 21 | 6 | -0.950000 | 14.941007657  | -24.453609004 | 1.012582885  | 0 | 1 | 1 | # | oh  |
| 3449 | 21 | 3 | -1.050000 | 12.432131651  | -24.450573030 | 3.061482417  | 0 | 1 | 1 | # | ob  |
| 3450 | 21 | 4 | -0.950000 | 13.530842343  | -20.000940996 | -1.012582885 | 0 | 1 | 1 | # | oho |
| 3451 | 21 | 5 | -0.950000 | 10.863018349  | -20.003976970 | -3.061482417 | 0 | 1 | 1 | # | oht |
| 3452 | 21 | 6 | -0.950000 | 10.942492343  | -24.455490996 | -1.012582885 | 0 | 1 | 1 | # | oh  |
| 3453 | 21 | 3 | -1.050000 | 13.451368349  | -24.458526970 | -3.061482417 | 0 | 1 | 1 | # | ob  |
| 3454 | 21 | 3 | -1.050000 | 14.548205513  | -27.228199320 | 1.033631378  | 0 | 1 | 1 | # | ob  |
| 3455 | 21 | 3 | -1.050000 | 10.506910908  | -22.594160300 | 3.233079711  | 0 | 1 | 1 | # | ob  |
| 3456 | 21 | 3 | -1.050000 | 13.923064655  | -22.777048519 | -1.033422068 | 0 | 1 | 1 | # | ob  |
| 3457 | 21 | 3 | -1.050000 | 12.788567264  | -27.058553874 | -3.231846262 | 0 | 1 | 1 | # | ob  |
| 3458 | 21 | 7 | 2.100000  | 14.576397014  | -27.381980796 | 2.662777170  | 0 | 1 | 1 | # | st  |
| 3459 | 21 | 7 | 2.100000  | 13.895427774  | -22.935729218 | -2.661798097 | 0 | 1 | 1 | # | st  |
| 3460 | 21 | 7 | 2.100000  | 11.307102986  | -21.527119204 | -2.662777170 | 0 | 1 | 1 | # | st  |
| 3461 | 21 | 7 | 2.100000  | 13.895452986  | -25.981669204 | -2.662777170 | 0 | 1 | 1 | # | st  |
| 3462 | 21 | 7 | 2.100000  | 14.576422226  | -21.518820782 | 2.661798097  | 0 | 1 | 1 | # | st  |
| 3463 | 21 | 7 | 2.100000  | 11.988072226  | -25.973370782 | 2.661798097  | 0 | 1 | 1 | # | st  |
| 3464 | 21 | 7 | 2.100000  | 11.988047014  | -22.927430796 | 2.662777170  | 0 | 1 | 1 | # | st  |
| 3465 | 21 | 7 | 2.100000  | 11.307077774  | -27.390279218 | -2.661798097 | 0 | 1 | 1 | # | st  |
| 3466 | 22 | 1 | 1.575000  | -12.941544971 | 1.474661568   | 0.000270632  | 1 | 0 | 1 | # | ao  |
| 3467 | 22 | 1 | 1.575000  | -15.529894971 | 5.929211568   | 0.000270632  | 1 | 0 | 1 | # | ao  |
| 3468 | 22 | 1 | 1.575000  | -12.941955029 | 7.434438432   | -0.000270632 | 1 | 0 | 1 | # | ao  |
| 3469 | 22 | 1 | 1.575000  | -10.353605029 | 2.979888432   | -0.000270632 | 1 | 0 | 1 | # | ao  |
| 3470 | 22 | 2 | 0.425000  | -11.795449128 | 4.457267322   | 1.486115063  | 1 | 0 | 1 | # | ho  |

|      |    |   |           |               |              |              |   |   |   |   |     |
|------|----|---|-----------|---------------|--------------|--------------|---|---|---|---|-----|
| 3471 | 22 | 2 | 0.425000  | -14.383799128 | 0.002717322  | 1.486115063  | 1 | 0 | 1 | # | ho  |
| 3472 | 22 | 2 | 0.425000  | -14.088050872 | 4.451832678  | -1.486115063 | 1 | 0 | 1 | # | ho  |
| 3473 | 22 | 2 | 0.425000  | -11.499700872 | 8.906382678  | -1.486115063 | 1 | 0 | 1 | # | ho  |
| 3474 | 22 | 3 | -1.050000 | -14.548785345 | 1.677501481  | -1.033422068 | 1 | 0 | 1 | # | ob  |
| 3475 | 22 | 3 | -1.050000 | -10.506582736 | 6.305096126  | -3.231846262 | 1 | 0 | 1 | # | ob  |
| 3476 | 22 | 3 | -1.050000 | -11.959855513 | 2.773649320  | -1.033631378 | 1 | 0 | 1 | # | ob  |
| 3477 | 22 | 3 | -1.050000 | -13.095260908 | 7.048710300  | -3.233079711 | 1 | 0 | 1 | # | ob  |
| 3478 | 22 | 3 | -1.050000 | -14.548205513 | 7.228199320  | -1.033631378 | 1 | 0 | 1 | # | ob  |
| 3479 | 22 | 3 | -1.050000 | -13.923644487 | 6.135450680  | 1.033631378  | 1 | 0 | 1 | # | ob  |
| 3480 | 22 | 3 | -1.050000 | -10.506910908 | 2.594160300  | -3.233079711 | 1 | 0 | 1 | # | ob  |
| 3481 | 22 | 3 | -1.050000 | -13.923064655 | 2.777048519  | 1.033422068  | 1 | 0 | 1 | # | ob  |
| 3482 | 22 | 3 | -1.050000 | -12.788567264 | 7.058553874  | 3.231846262  | 1 | 0 | 1 | # | ob  |
| 3483 | 22 | 3 | -1.050000 | -11.334714655 | 7.231598519  | 1.033422068  | 1 | 0 | 1 | # | ob  |
| 3484 | 22 | 3 | -1.050000 | -15.376917264 | 2.604003874  | 3.231846262  | 1 | 0 | 1 | # | ob  |
| 3485 | 22 | 3 | -1.050000 | -12.788239092 | 1.860389700  | 3.233079711  | 1 | 0 | 1 | # | ob  |
| 3486 | 22 | 4 | -0.950000 | -13.530842343 | 0.000940996  | 1.012582885  | 1 | 0 | 1 | # | oho |
| 3487 | 22 | 5 | -0.950000 | -10.863018349 | 0.003976970  | 3.061482417  | 1 | 0 | 1 | # | oht |
| 3488 | 22 | 6 | -0.950000 | -10.942492343 | 4.455490996  | 1.012582885  | 1 | 0 | 1 | # | oh  |
| 3489 | 22 | 3 | -1.050000 | -13.451368349 | 4.458526970  | 3.061482417  | 1 | 0 | 1 | # | ob  |
| 3490 | 22 | 6 | -0.950000 | -12.352657657 | 8.908159004  | -1.012582885 | 1 | 0 | 1 | # | oh  |
| 3491 | 22 | 3 | -1.050000 | -15.020481651 | 8.905123030  | -3.061482417 | 1 | 0 | 1 | # | ob  |
| 3492 | 22 | 6 | -0.950000 | -14.941007657 | 4.453609004  | -1.012582885 | 1 | 0 | 1 | # | oh  |
| 3493 | 22 | 3 | -1.050000 | -12.432131651 | 4.450573030  | -3.061482417 | 1 | 0 | 1 | # | ob  |
| 3494 | 22 | 3 | -1.050000 | -11.335294487 | 1.680900680  | 1.033631378  | 1 | 0 | 1 | # | ob  |
| 3495 | 22 | 3 | -1.050000 | -15.376589092 | 6.314939700  | 3.233079711  | 1 | 0 | 1 | # | ob  |
| 3496 | 22 | 3 | -1.050000 | -11.960435345 | 6.132051481  | -1.033422068 | 1 | 0 | 1 | # | ob  |
| 3497 | 22 | 3 | -1.050000 | -13.094932736 | 1.850546126  | -3.231846262 | 1 | 0 | 1 | # | ob  |
| 3498 | 22 | 7 | 2.100000  | -11.307102986 | 1.527119204  | 2.662777170  | 1 | 0 | 1 | # | st  |
| 3499 | 22 | 7 | 2.100000  | -11.988072226 | 5.973370782  | -2.661798097 | 1 | 0 | 1 | # | st  |
| 3500 | 22 | 7 | 2.100000  | -14.576397014 | 7.381980796  | -2.662777170 | 1 | 0 | 1 | # | st  |
| 3501 | 22 | 7 | 2.100000  | -11.988047014 | 2.927430796  | -2.662777170 | 1 | 0 | 1 | # | st  |
| 3502 | 22 | 7 | 2.100000  | -11.307077774 | 7.390279218  | 2.661798097  | 1 | 0 | 1 | # | st  |
| 3503 | 22 | 7 | 2.100000  | -13.895427774 | 2.935729218  | 2.661798097  | 1 | 0 | 1 | # | st  |
| 3504 | 22 | 7 | 2.100000  | -13.895452986 | 5.981669204  | 2.662777170  | 1 | 0 | 1 | # | st  |
| 3505 | 22 | 7 | 2.100000  | -14.576422226 | 1.518820782  | -2.661798097 | 1 | 0 | 1 | # | st  |
| 3506 | 22 | 1 | 1.575000  | -12.941544971 | 10.383761568 | 0.000270632  | 1 | 0 | 1 | # | ao  |
| 3507 | 22 | 1 | 1.575000  | -15.529894971 | 14.838311568 | 0.000270632  | 1 | 0 | 1 | # | ao  |
| 3508 | 22 | 1 | 1.575000  | -12.941955029 | 16.343538432 | -0.000270632 | 1 | 0 | 1 | # | ao  |
| 3509 | 22 | 1 | 1.575000  | -10.353605029 | 11.888988432 | -0.000270632 | 1 | 0 | 1 | # | ao  |
| 3510 | 22 | 2 | 0.425000  | -11.795449128 | 13.366367322 | 1.486115063  | 1 | 0 | 1 | # | ho  |
| 3511 | 22 | 2 | 0.425000  | -14.383799128 | 8.911817322  | 1.486115063  | 1 | 0 | 1 | # | ho  |
| 3512 | 22 | 2 | 0.425000  | -14.088050872 | 13.360932678 | -1.486115063 | 1 | 0 | 1 | # | ho  |
| 3513 | 22 | 2 | 0.425000  | -11.499700872 | 17.815482678 | -1.486115063 | 1 | 0 | 1 | # | ho  |
| 3514 | 22 | 3 | -1.050000 | -14.548785345 | 10.586601481 | -1.033422068 | 1 | 0 | 1 | # | ob  |
| 3515 | 22 | 3 | -1.050000 | -10.506582736 | 15.214196126 | -3.231846262 | 1 | 0 | 1 | # | ob  |
| 3516 | 22 | 3 | -1.050000 | -11.959855513 | 11.682749320 | -1.033631378 | 1 | 0 | 1 | # | ob  |
| 3517 | 22 | 3 | -1.050000 | -13.095260908 | 15.957810300 | -3.233079711 | 1 | 0 | 1 | # | ob  |
| 3518 | 22 | 3 | -1.050000 | -14.548205513 | 16.137299320 | -1.033631378 | 1 | 0 | 1 | # | ob  |
| 3519 | 22 | 3 | -1.050000 | -13.923644487 | 15.044550680 | 1.033631378  | 1 | 0 | 1 | # | ob  |
| 3520 | 22 | 3 | -1.050000 | -10.506910908 | 11.503260300 | -3.233079711 | 1 | 0 | 1 | # | ob  |
| 3521 | 22 | 3 | -1.050000 | -13.923064655 | 11.686148519 | 1.033422068  | 1 | 0 | 1 | # | ob  |
| 3522 | 22 | 3 | -1.050000 | -12.788567264 | 15.967653874 | 3.231846262  | 1 | 0 | 1 | # | ob  |
| 3523 | 22 | 3 | -1.050000 | -11.334714655 | 16.140698519 | 1.033422068  | 1 | 0 | 1 | # | ob  |
| 3524 | 22 | 3 | -1.050000 | -15.376917264 | 11.513103874 | 3.231846262  | 1 | 0 | 1 | # | ob  |
| 3525 | 22 | 3 | -1.050000 | -12.788239092 | 10.769489700 | 3.233079711  | 1 | 0 | 1 | # | ob  |
| 3526 | 22 | 6 | -0.950000 | -13.530842343 | 8.910040996  | 1.012582885  | 1 | 0 | 1 | # | oh  |
| 3527 | 22 | 3 | -1.050000 | -10.863018349 | 8.913076970  | 3.061482417  | 1 | 0 | 1 | # | ob  |
| 3528 | 22 | 6 | -0.950000 | -10.942492343 | 13.364590996 | 1.012582885  | 1 | 0 | 1 | # | oh  |
| 3529 | 22 | 3 | -1.050000 | -13.451368349 | 13.367626970 | 3.061482417  | 1 | 0 | 1 | # | ob  |
| 3530 | 22 | 6 | -0.950000 | -12.352657657 | 17.817259004 | -1.012582885 | 1 | 0 | 1 | # | oh  |
| 3531 | 22 | 3 | -1.050000 | -15.020481651 | 17.814223030 | -3.061482417 | 1 | 0 | 1 | # | ob  |
| 3532 | 22 | 6 | -0.950000 | -14.941007657 | 13.362709004 | -1.012582885 | 1 | 0 | 1 | # | oh  |
| 3533 | 22 | 3 | -1.050000 | -12.432131651 | 13.359673030 | -3.061482417 | 1 | 0 | 1 | # | ob  |
| 3534 | 22 | 3 | -1.050000 | -11.335294487 | 10.590000680 | 1.033631378  | 1 | 0 | 1 | # | ob  |
| 3535 | 22 | 3 | -1.050000 | -15.376589092 | 15.224039700 | 3.233079711  | 1 | 0 | 1 | # | ob  |
| 3536 | 22 | 3 | -1.050000 | -11.960435345 | 15.041151481 | -1.033422068 | 1 | 0 | 1 | # | ob  |
| 3537 | 22 | 3 | -1.050000 | -13.094932736 | 10.759646126 | -3.231846262 | 1 | 0 | 1 | # | ob  |
| 3538 | 22 | 7 | 2.100000  | -11.307102986 | 10.436219204 | 2.662777170  | 1 | 0 | 1 | # | st  |
| 3539 | 22 | 7 | 2.100000  | -11.988072226 | 14.882470782 | -2.661798097 | 1 | 0 | 1 | # | st  |
| 3540 | 22 | 7 | 2.100000  | -14.576397014 | 16.291080796 | -2.662777170 | 1 | 0 | 1 | # | st  |
| 3541 | 22 | 7 | 2.100000  | -11.988047014 | 11.836530796 | -2.662777170 | 1 | 0 | 1 | # | st  |
| 3542 | 22 | 7 | 2.100000  | -11.307077774 | 16.299379218 | 2.661798097  | 1 | 0 | 1 | # | st  |
| 3543 | 22 | 7 | 2.100000  | -13.895427774 | 11.844829218 | 2.661798097  | 1 | 0 | 1 | # | st  |
| 3544 | 22 | 7 | 2.100000  | -13.895452986 | 14.890769204 | 2.662777170  | 1 | 0 | 1 | # | st  |
| 3545 | 22 | 7 | 2.100000  | -14.576422226 | 10.427920782 | -2.661798097 | 1 | 0 | 1 | # | st  |
| 3546 | 22 | 1 | 1.575000  | -12.941544971 | 19.292861568 | 0.000270632  | 1 | 0 | 1 | # | ao  |
| 3547 | 22 | 1 | 1.575000  | -15.529894971 | 23.747411568 | 0.000270632  | 1 | 0 | 1 | # | ao  |
| 3548 | 22 | 1 | 1.575000  | -12.941955029 | 25.252638432 | -0.000270632 | 1 | 0 | 1 | # | ao  |
| 3549 | 22 | 1 | 1.575000  | -10.353605029 | 20.798088432 | -0.000270632 | 1 | 0 | 1 | # | ao  |
| 3550 | 22 | 2 | 0.425000  | -11.795449128 | 22.275467322 | 1.486115063  | 1 | 0 | 1 | # | ho  |
| 3551 | 22 | 2 | 0.425000  | -14.383799128 | 17.820917322 | 1.486115063  | 1 | 0 | 1 | # | ho  |
| 3552 | 22 | 2 | 0.425000  | -14.088050872 | 22.270032678 | -1.486115063 | 1 | 0 | 1 | # | ho  |
| 3553 | 22 | 2 | 0.425000  | -11.499700872 | 26.724582678 | -1.486115063 | 1 | 0 | 1 | # | ho  |
| 3554 | 22 | 3 | -1.050000 | -14.548785345 | 19.495701481 | -1.033422068 | 1 | 0 | 1 | # | ob  |
| 3555 | 22 | 3 | -1.050000 | -10.506582736 | 24.123296126 | -3.231846262 | 1 | 0 | 1 | # | ob  |
| 3556 | 22 | 3 | -1.050000 | -11.959855513 | 20.591849320 | -1.033631378 | 1 | 0 | 1 | # | ob  |
| 3557 | 22 | 3 | -1.050000 | -13.095260908 | 24.866910300 | -3.233079711 | 1 | 0 | 1 | # | ob  |
| 3558 | 22 | 3 | -1.050000 | -14.548205513 | 25.046399320 | -1.033631378 | 1 | 0 | 1 | # | ob  |
| 3559 | 22 | 3 | -1.050000 | -13.923644487 | 23.953650680 | 1.033631378  | 1 | 0 | 1 | # | ob  |
| 3560 | 22 | 3 | -1.050000 | -10.506910908 | 20.412360300 | -3.233079711 | 1 | 0 | 1 | # | ob  |
| 3561 | 22 | 3 | -1.050000 | -13.923064655 | 20.595248519 | 1.033422068  | 1 | 0 | 1 | # | ob  |
| 3562 | 22 | 3 | -1.050000 | -12.788567264 | 24.876753874 | 3.231846262  | 1 | 0 | 1 | # | ob  |
| 3563 | 22 | 3 | -1.050000 | -11.334714655 | 25.049798519 | 1.033422068  | 1 | 0 | 1 | # | ob  |

|      |    |   |           |               |               |              |   |   |   |   |     |
|------|----|---|-----------|---------------|---------------|--------------|---|---|---|---|-----|
| 3564 | 22 | 3 | -1.050000 | -15.376917264 | 20.422203874  | 3.231846262  | 1 | 0 | 1 | # | ob  |
| 3565 | 22 | 3 | -1.050000 | -12.788239092 | 19.678589700  | 3.233079711  | 1 | 0 | 1 | # | ob  |
| 3566 | 22 | 6 | -0.950000 | -13.530842343 | 17.819140996  | 1.012582885  | 1 | 0 | 1 | # | oh  |
| 3567 | 22 | 3 | -1.050000 | -10.863018349 | 17.822176970  | 3.061482417  | 1 | 0 | 1 | # | ob  |
| 3568 | 22 | 6 | -0.950000 | -10.942492343 | 22.273690996  | 1.012582885  | 1 | 0 | 1 | # | oh  |
| 3569 | 22 | 3 | -1.050000 | -13.451368349 | 22.276726970  | 3.061482417  | 1 | 0 | 1 | # | ob  |
| 3570 | 22 | 6 | -0.950000 | -12.352657657 | 26.726359004  | -1.012582885 | 1 | 0 | 1 | # | oh  |
| 3571 | 22 | 3 | -1.050000 | -15.020481651 | 26.723323030  | -3.061482417 | 1 | 0 | 1 | # | ob  |
| 3572 | 22 | 6 | -0.950000 | -14.941007657 | 22.271809004  | -1.012582885 | 1 | 0 | 1 | # | oh  |
| 3573 | 22 | 3 | -1.050000 | -12.432131651 | 22.268773030  | -3.061482417 | 1 | 0 | 1 | # | ob  |
| 3574 | 22 | 3 | -1.050000 | -11.335294487 | 19.499100680  | 1.033631378  | 1 | 0 | 1 | # | ob  |
| 3575 | 22 | 3 | -1.050000 | -15.376589092 | 24.133139700  | 3.233079711  | 1 | 0 | 1 | # | ob  |
| 3576 | 22 | 3 | -1.050000 | -11.960435345 | 23.950251481  | -1.033422068 | 1 | 0 | 1 | # | ob  |
| 3577 | 22 | 3 | -1.050000 | -13.094932736 | 19.668746126  | -3.231846262 | 1 | 0 | 1 | # | ob  |
| 3578 | 22 | 7 | 2.100000  | -11.307102986 | 19.345319204  | 2.662777170  | 1 | 0 | 1 | # | st  |
| 3579 | 22 | 7 | 2.100000  | -11.988072226 | 23.791570782  | -2.661798097 | 1 | 0 | 1 | # | st  |
| 3580 | 22 | 7 | 2.100000  | -14.576397014 | 25.200180796  | -2.662777170 | 1 | 0 | 1 | # | st  |
| 3581 | 22 | 7 | 2.100000  | -11.988047014 | 20.745630796  | -2.662777170 | 1 | 0 | 1 | # | st  |
| 3582 | 22 | 7 | 2.100000  | -11.307077774 | 25.208479218  | 2.661798097  | 1 | 0 | 1 | # | st  |
| 3583 | 22 | 7 | 2.100000  | -13.895427774 | 20.753929218  | 2.661798097  | 1 | 0 | 1 | # | st  |
| 3584 | 22 | 7 | 2.100000  | -13.895452986 | 23.799869204  | 2.662777170  | 1 | 0 | 1 | # | st  |
| 3585 | 22 | 7 | 2.100000  | -14.576422226 | 19.337020782  | -2.661798097 | 1 | 0 | 1 | # | st  |
| 3586 | 22 | 1 | 1.575000  | -12.941544971 | -27.434438432 | 0.000270632  | 1 | 1 | 1 | # | ao  |
| 3587 | 22 | 1 | 1.575000  | -15.529894971 | -22.979888432 | 0.000270632  | 1 | 1 | 1 | # | ao  |
| 3588 | 22 | 1 | 1.575000  | -12.941955029 | -21.474661568 | -0.000270632 | 1 | 1 | 1 | # | ao  |
| 3589 | 22 | 1 | 1.575000  | -10.353605029 | -25.929211568 | -0.000270632 | 1 | 1 | 1 | # | ao  |
| 3590 | 22 | 2 | 0.425000  | -11.795449128 | -24.451832678 | 1.486115063  | 1 | 1 | 1 | # | ho  |
| 3591 | 22 | 2 | 0.425000  | -14.383799128 | 26.730017322  | 1.486115063  | 1 | 0 | 1 | # | ho  |
| 3592 | 22 | 2 | 0.425000  | -14.088050872 | -24.457267322 | -1.486115063 | 1 | 1 | 1 | # | ho  |
| 3593 | 22 | 2 | 0.425000  | -11.499700872 | -20.002717322 | -1.486115063 | 1 | 1 | 1 | # | ho  |
| 3594 | 22 | 3 | -1.050000 | -14.548785345 | -27.231598519 | -1.033422068 | 1 | 1 | 1 | # | ob  |
| 3595 | 22 | 3 | -1.050000 | -10.506582736 | -22.604003874 | -3.231846262 | 1 | 1 | 1 | # | ob  |
| 3596 | 22 | 3 | -1.050000 | -11.959855513 | -26.135450680 | -1.033631378 | 1 | 1 | 1 | # | ob  |
| 3597 | 22 | 3 | -1.050000 | -13.095260908 | -21.860389700 | -3.233079711 | 1 | 1 | 1 | # | ob  |
| 3598 | 22 | 3 | -1.050000 | -14.548205513 | -21.680900680 | -1.033631378 | 1 | 1 | 1 | # | ob  |
| 3599 | 22 | 3 | -1.050000 | -13.923644487 | -22.773649320 | 1.033631378  | 1 | 1 | 1 | # | ob  |
| 3600 | 22 | 3 | -1.050000 | -10.506910908 | -26.314939700 | -3.233079711 | 1 | 1 | 1 | # | ob  |
| 3601 | 22 | 3 | -1.050000 | -13.923064655 | -26.132051481 | 1.033422068  | 1 | 1 | 1 | # | ob  |
| 3602 | 22 | 3 | -1.050000 | -12.788567264 | -21.850546126 | 3.231846262  | 1 | 1 | 1 | # | ob  |
| 3603 | 22 | 3 | -1.050000 | -11.334714655 | -21.677501481 | 1.033422068  | 1 | 1 | 1 | # | ob  |
| 3604 | 22 | 3 | -1.050000 | -15.376917264 | -26.305096126 | 3.231846262  | 1 | 1 | 1 | # | ob  |
| 3605 | 22 | 3 | -1.050000 | -12.788239092 | -27.048710300 | 3.233079711  | 1 | 1 | 1 | # | ob  |
| 3606 | 22 | 6 | -0.950000 | -13.530842343 | 26.728240996  | 1.012582885  | 1 | 0 | 1 | # | oh  |
| 3607 | 22 | 3 | -1.050000 | -10.863018349 | 26.731276970  | 3.061482417  | 1 | 0 | 1 | # | ob  |
| 3608 | 22 | 6 | -0.950000 | -10.942492343 | -24.453609004 | 1.012582885  | 1 | 0 | 1 | # | oh  |
| 3609 | 22 | 3 | -1.050000 | -13.451368349 | -24.450573030 | 3.061482417  | 1 | 0 | 1 | # | ob  |
| 3610 | 22 | 4 | -0.950000 | -12.352657657 | -20.000940996 | -1.012582885 | 1 | 1 | 1 | # | oho |
| 3611 | 22 | 5 | -0.950000 | -15.020481651 | -20.003976970 | -3.061482417 | 1 | 1 | 1 | # | oht |
| 3612 | 22 | 6 | -0.950000 | -14.941007657 | -24.455490996 | -1.012582885 | 1 | 1 | 1 | # | oh  |
| 3613 | 22 | 3 | -1.050000 | -12.432131651 | -24.458526970 | -3.061482417 | 1 | 1 | 1 | # | ob  |
| 3614 | 22 | 3 | -1.050000 | -11.335294487 | -27.228199320 | 1.033631378  | 1 | 1 | 1 | # | ob  |
| 3615 | 22 | 3 | -1.050000 | -15.376589092 | -22.594160300 | 3.233079711  | 1 | 1 | 1 | # | ob  |
| 3616 | 22 | 3 | -1.050000 | -11.960435345 | -22.777048519 | -1.033422068 | 1 | 1 | 1 | # | ob  |
| 3617 | 22 | 3 | -1.050000 | -13.094932736 | -27.058553874 | -3.231846262 | 1 | 1 | 1 | # | ob  |
| 3618 | 22 | 7 | 2.100000  | -11.307102986 | -27.381980796 | 2.662777170  | 1 | 1 | 1 | # | st  |
| 3619 | 22 | 7 | 2.100000  | -11.988072226 | -22.935729218 | -2.661798097 | 1 | 1 | 1 | # | st  |
| 3620 | 22 | 7 | 2.100000  | -14.576397014 | -21.527119204 | -2.662777170 | 1 | 1 | 1 | # | st  |
| 3621 | 22 | 7 | 2.100000  | -11.988047014 | -25.981669204 | -2.662777170 | 1 | 1 | 1 | # | st  |
| 3622 | 22 | 7 | 2.100000  | -11.307077774 | -21.518820782 | 2.661798097  | 1 | 1 | 1 | # | st  |
| 3623 | 22 | 7 | 2.100000  | -13.895427774 | -25.973370782 | 2.661798097  | 1 | 1 | 1 | # | st  |
| 3624 | 22 | 7 | 2.100000  | -13.895452986 | -22.927430796 | 2.662777170  | 1 | 1 | 1 | # | st  |
| 3625 | 22 | 7 | 2.100000  | -14.576422226 | -27.390279218 | -2.661798097 | 1 | 1 | 1 | # | st  |
| 3626 | 23 | 1 | 1.575000  | -7.764844971  | 1.474661568   | 0.000270632  | 1 | 0 | 1 | # | ao  |
| 3627 | 23 | 1 | 1.575000  | -10.353194971 | 5.929211568   | 0.000270632  | 1 | 0 | 1 | # | ao  |
| 3628 | 23 | 1 | 1.575000  | -7.765255029  | 7.434438432   | -0.000270632 | 1 | 0 | 1 | # | ao  |
| 3629 | 23 | 1 | 1.575000  | -5.176905029  | 2.979888432   | -0.000270632 | 1 | 0 | 1 | # | ao  |
| 3630 | 23 | 2 | 0.425000  | -6.618749128  | 4.457267322   | 1.486115063  | 1 | 0 | 1 | # | ho  |
| 3631 | 23 | 2 | 0.425000  | -9.207099128  | 0.002717322   | 1.486115063  | 1 | 0 | 1 | # | ho  |
| 3632 | 23 | 2 | 0.425000  | -8.911350872  | 4.451832678   | -1.486115063 | 1 | 0 | 1 | # | ho  |
| 3633 | 23 | 2 | 0.425000  | -6.323000872  | 8.906382678   | -1.486115063 | 1 | 0 | 1 | # | ho  |
| 3634 | 23 | 3 | -1.050000 | -9.372085345  | 1.677501481   | -1.033422068 | 1 | 0 | 1 | # | ob  |
| 3635 | 23 | 3 | -1.050000 | -5.329882736  | 6.305096126   | -3.231846262 | 1 | 0 | 1 | # | ob  |
| 3636 | 23 | 3 | -1.050000 | -6.783155513  | 2.773649320   | -1.033631378 | 1 | 0 | 1 | # | ob  |
| 3637 | 23 | 3 | -1.050000 | -7.918560908  | 7.048710300   | -3.233079711 | 1 | 0 | 1 | # | ob  |
| 3638 | 23 | 3 | -1.050000 | -9.371505513  | 7.228199320   | -1.033631378 | 1 | 0 | 1 | # | ob  |
| 3639 | 23 | 3 | -1.050000 | -8.746944487  | 6.135450680   | 1.033631378  | 1 | 0 | 1 | # | ob  |
| 3640 | 23 | 3 | -1.050000 | -5.330210908  | 2.594160300   | -3.233079711 | 1 | 0 | 1 | # | ob  |
| 3641 | 23 | 3 | -1.050000 | -8.746364655  | 2.777048519   | 1.033422068  | 1 | 0 | 1 | # | ob  |
| 3642 | 23 | 3 | -1.050000 | -7.611867264  | 7.058553874   | 3.231846262  | 1 | 0 | 1 | # | ob  |
| 3643 | 23 | 3 | -1.050000 | -6.158014655  | 7.231598519   | 1.033422068  | 1 | 0 | 1 | # | ob  |
| 3644 | 23 | 3 | -1.050000 | -10.200217264 | 2.604003874   | 3.231846262  | 1 | 0 | 1 | # | ob  |
| 3645 | 23 | 3 | -1.050000 | -7.611539092  | 1.860389700   | 3.233079711  | 1 | 0 | 1 | # | ob  |
| 3646 | 23 | 4 | -0.950000 | -8.354142343  | 0.000940996   | 1.012582885  | 1 | 0 | 1 | # | oho |
| 3647 | 23 | 5 | -0.950000 | -5.686318349  | 0.003976970   | 3.061482417  | 1 | 0 | 1 | # | oht |
| 3648 | 23 | 6 | -0.950000 | -5.765792343  | 4.455490996   | 1.012582885  | 1 | 0 | 1 | # | oh  |
| 3649 | 23 | 3 | -1.050000 | -8.274668349  | 4.458526970   | 3.061482417  | 1 | 0 | 1 | # | ob  |
| 3650 | 23 | 6 | -0.950000 | -7.175957657  | 8.908159004   | -1.012582885 | 1 | 0 | 1 | # | oh  |
| 3651 | 23 | 3 | -1.050000 | -9.843781651  | 8.905123030   | -3.061482417 | 1 | 0 | 1 | # | ob  |
| 3652 | 23 | 6 | -0.950000 | -9.764307657  | 4.453609004   | -1.012582885 | 1 | 0 | 1 | # | oh  |
| 3653 | 23 | 3 | -1.050000 | -7.255431651  | 4.450573030   | -3.061482417 | 1 | 0 | 1 | # | ob  |
| 3654 | 23 | 3 | -1.050000 | -6.158594487  | 1.680900680   | 1.033631378  | 1 | 0 | 1 | # | ob  |
| 3655 | 23 | 3 | -1.050000 | -10.199889092 | 6.314939700   | 3.233079711  | 1 | 0 | 1 | # | ob  |
| 3656 | 23 | 3 | -1.050000 | -6.783735345  | 6.132051481   | -1.033422068 | 1 | 0 | 1 | # | ob  |

|      |    |   |           |               |               |              |   |   |   |   |    |
|------|----|---|-----------|---------------|---------------|--------------|---|---|---|---|----|
| 3657 | 23 | 3 | -1.050000 | -7.918232736  | 1.850546126   | -3.231846262 | 1 | 0 | 1 | # | ob |
| 3658 | 23 | 7 | 2.100000  | -6.130402986  | 1.527119204   | 2.662777170  | 1 | 0 | 1 | # | st |
| 3659 | 23 | 7 | 2.100000  | -6.811372226  | 5.973370782   | -2.661798097 | 1 | 0 | 1 | # | st |
| 3660 | 23 | 7 | 2.100000  | -9.399697014  | 7.381980796   | -2.662777170 | 1 | 0 | 1 | # | st |
| 3661 | 23 | 7 | 2.100000  | -6.811347014  | 2.927430796   | -2.662777170 | 1 | 0 | 1 | # | st |
| 3662 | 23 | 7 | 2.100000  | -6.130377774  | 7.390279218   | 2.661798097  | 1 | 0 | 1 | # | st |
| 3663 | 23 | 7 | 2.100000  | -8.718727774  | 2.935729218   | 2.661798097  | 1 | 0 | 1 | # | st |
| 3664 | 23 | 7 | 2.100000  | -8.718752986  | 5.981669204   | 2.662777170  | 1 | 0 | 1 | # | st |
| 3665 | 23 | 7 | 2.100000  | -9.399722226  | 1.518820782   | -2.661798097 | 1 | 0 | 1 | # | st |
| 3666 | 23 | 1 | 1.575000  | -7.764844971  | 10.383761568  | 0.000270632  | 1 | 0 | 1 | # | ao |
| 3667 | 23 | 1 | 1.575000  | -10.353194971 | 14.838311568  | 0.000270632  | 1 | 0 | 1 | # | ao |
| 3668 | 23 | 1 | 1.575000  | -7.765255029  | 16.343538432  | -0.000270632 | 1 | 0 | 1 | # | ao |
| 3669 | 23 | 1 | 1.575000  | -5.176905029  | 11.888988432  | -0.000270632 | 1 | 0 | 1 | # | ao |
| 3670 | 23 | 2 | 0.425000  | -6.618749128  | 13.366367322  | 1.486115063  | 1 | 0 | 1 | # | ho |
| 3671 | 23 | 2 | 0.425000  | -9.207099128  | 8.911817322   | 1.486115063  | 1 | 0 | 1 | # | ho |
| 3672 | 23 | 2 | 0.425000  | -8.911350872  | 13.360932678  | -1.486115063 | 1 | 0 | 1 | # | ho |
| 3673 | 23 | 2 | 0.425000  | -6.323000872  | 17.815482678  | -1.486115063 | 1 | 0 | 1 | # | ho |
| 3674 | 23 | 3 | -1.050000 | -9.372085345  | 10.586601481  | -1.033422068 | 1 | 0 | 1 | # | ob |
| 3675 | 23 | 3 | -1.050000 | -5.329882736  | 15.214196126  | -3.231846262 | 1 | 0 | 1 | # | ob |
| 3676 | 23 | 3 | -1.050000 | -6.783155513  | 11.682749320  | -1.033631378 | 1 | 0 | 1 | # | ob |
| 3677 | 23 | 3 | -1.050000 | -7.918560908  | 15.957810300  | -3.233079711 | 1 | 0 | 1 | # | ob |
| 3678 | 23 | 3 | -1.050000 | -9.371505513  | 16.137299320  | -1.033631378 | 1 | 0 | 1 | # | ob |
| 3679 | 23 | 3 | -1.050000 | -8.746944487  | 15.044550680  | 1.033631378  | 1 | 0 | 1 | # | ob |
| 3680 | 23 | 3 | -1.050000 | -5.330210908  | 11.503260300  | -3.233079711 | 1 | 0 | 1 | # | ob |
| 3681 | 23 | 3 | -1.050000 | -8.746364655  | 11.686148519  | 1.033422068  | 1 | 0 | 1 | # | ob |
| 3682 | 23 | 3 | -1.050000 | -7.611867264  | 15.967653874  | 3.231846262  | 1 | 0 | 1 | # | ob |
| 3683 | 23 | 3 | -1.050000 | -6.158014655  | 16.140698519  | 1.033422068  | 1 | 0 | 1 | # | ob |
| 3684 | 23 | 3 | -1.050000 | -10.200217264 | 11.513103874  | 3.231846262  | 1 | 0 | 1 | # | ob |
| 3685 | 23 | 3 | -1.050000 | -7.611539092  | 10.769489700  | 3.233079711  | 1 | 0 | 1 | # | ob |
| 3686 | 23 | 6 | -0.950000 | -8.354142343  | 8.910040996   | 1.012582885  | 1 | 0 | 1 | # | oh |
| 3687 | 23 | 3 | -1.050000 | -5.686318349  | 8.913076970   | 3.061482417  | 1 | 0 | 1 | # | ob |
| 3688 | 23 | 6 | -0.950000 | -5.765792343  | 13.364590996  | 1.012582885  | 1 | 0 | 1 | # | oh |
| 3689 | 23 | 3 | -1.050000 | -8.274668349  | 13.367626970  | 3.061482417  | 1 | 0 | 1 | # | ob |
| 3690 | 23 | 6 | -0.950000 | -7.175957657  | 17.817259004  | -1.012582885 | 1 | 0 | 1 | # | oh |
| 3691 | 23 | 3 | -1.050000 | -9.843781651  | 17.814223030  | -3.061482417 | 1 | 0 | 1 | # | ob |
| 3692 | 23 | 6 | -0.950000 | -9.764307657  | 13.362709004  | -1.012582885 | 1 | 0 | 1 | # | oh |
| 3693 | 23 | 3 | -1.050000 | -7.255431651  | 13.359673030  | -3.061482417 | 1 | 0 | 1 | # | ob |
| 3694 | 23 | 3 | -1.050000 | -6.158594487  | 10.590000680  | 1.033631378  | 1 | 0 | 1 | # | ob |
| 3695 | 23 | 3 | -1.050000 | -10.199889092 | 15.224039700  | 3.233079711  | 1 | 0 | 1 | # | ob |
| 3696 | 23 | 3 | -1.050000 | -6.783735345  | 15.041151481  | -1.033422068 | 1 | 0 | 1 | # | ob |
| 3697 | 23 | 3 | -1.050000 | -7.918232736  | 10.759646126  | -3.231846262 | 1 | 0 | 1 | # | ob |
| 3698 | 23 | 7 | 2.100000  | -6.130402986  | 10.436219204  | 2.662777170  | 1 | 0 | 1 | # | st |
| 3699 | 23 | 7 | 2.100000  | -6.811372226  | 14.882470782  | -2.661798097 | 1 | 0 | 1 | # | st |
| 3700 | 23 | 7 | 2.100000  | -9.399697014  | 16.291080796  | -2.662777170 | 1 | 0 | 1 | # | st |
| 3701 | 23 | 7 | 2.100000  | -6.811347014  | 11.836530796  | -2.662777170 | 1 | 0 | 1 | # | st |
| 3702 | 23 | 7 | 2.100000  | -6.130377774  | 16.299379218  | 2.661798097  | 1 | 0 | 1 | # | st |
| 3703 | 23 | 7 | 2.100000  | -8.718727774  | 11.844829218  | 2.661798097  | 1 | 0 | 1 | # | st |
| 3704 | 23 | 7 | 2.100000  | -8.718752986  | 14.890769204  | 2.662777170  | 1 | 0 | 1 | # | st |
| 3705 | 23 | 7 | 2.100000  | -9.399722226  | 10.427920782  | -2.661798097 | 1 | 0 | 1 | # | st |
| 3706 | 23 | 1 | 1.575000  | -7.764844971  | 19.292861568  | 0.000270632  | 1 | 0 | 1 | # | ao |
| 3707 | 23 | 1 | 1.575000  | -10.353194971 | 23.747411568  | 0.000270632  | 1 | 0 | 1 | # | ao |
| 3708 | 23 | 1 | 1.575000  | -7.765255029  | 25.252638432  | -0.000270632 | 1 | 0 | 1 | # | ao |
| 3709 | 23 | 1 | 1.575000  | -5.176905029  | 20.798088432  | -0.000270632 | 1 | 0 | 1 | # | ao |
| 3710 | 23 | 2 | 0.425000  | -6.618749128  | 22.275467322  | 1.486115063  | 1 | 0 | 1 | # | ho |
| 3711 | 23 | 2 | 0.425000  | -9.207099128  | 17.820917322  | 1.486115063  | 1 | 0 | 1 | # | ho |
| 3712 | 23 | 2 | 0.425000  | -8.911350872  | 22.270032678  | -1.486115063 | 1 | 0 | 1 | # | ho |
| 3713 | 23 | 2 | 0.425000  | -6.323000872  | 26.724582678  | -1.486115063 | 1 | 0 | 1 | # | ho |
| 3714 | 23 | 3 | -1.050000 | -9.372085345  | 19.495701481  | -1.033422068 | 1 | 0 | 1 | # | ob |
| 3715 | 23 | 3 | -1.050000 | -5.329882736  | 24.123296126  | -3.231846262 | 1 | 0 | 1 | # | ob |
| 3716 | 23 | 3 | -1.050000 | -6.783155513  | 20.591849320  | -1.033631378 | 1 | 0 | 1 | # | ob |
| 3717 | 23 | 3 | -1.050000 | -7.918560908  | 24.866910300  | -3.233079711 | 1 | 0 | 1 | # | ob |
| 3718 | 23 | 3 | -1.050000 | -9.371505513  | 25.046399320  | -1.033631378 | 1 | 0 | 1 | # | ob |
| 3719 | 23 | 3 | -1.050000 | -8.746944487  | 23.953650680  | 1.033631378  | 1 | 0 | 1 | # | ob |
| 3720 | 23 | 3 | -1.050000 | -5.330210908  | 20.412360300  | -3.233079711 | 1 | 0 | 1 | # | ob |
| 3721 | 23 | 3 | -1.050000 | -8.746364655  | 20.595248519  | 1.033422068  | 1 | 0 | 1 | # | ob |
| 3722 | 23 | 3 | -1.050000 | -7.611867264  | 24.876753874  | 3.231846262  | 1 | 0 | 1 | # | ob |
| 3723 | 23 | 3 | -1.050000 | -6.158014655  | 25.049798519  | 1.033422068  | 1 | 0 | 1 | # | ob |
| 3724 | 23 | 3 | -1.050000 | -10.200217264 | 20.422203874  | 3.231846262  | 1 | 0 | 1 | # | ob |
| 3725 | 23 | 3 | -1.050000 | -7.611539092  | 19.678589700  | 3.233079711  | 1 | 0 | 1 | # | ob |
| 3726 | 23 | 6 | -0.950000 | -8.354142343  | 17.819140996  | 1.012582885  | 1 | 0 | 1 | # | oh |
| 3727 | 23 | 3 | -1.050000 | -5.686318349  | 17.822176970  | 3.061482417  | 1 | 0 | 1 | # | ob |
| 3728 | 23 | 6 | -0.950000 | -5.765792343  | 22.273690996  | 1.012582885  | 1 | 0 | 1 | # | oh |
| 3729 | 23 | 3 | -1.050000 | -8.274668349  | 22.276726970  | 3.061482417  | 1 | 0 | 1 | # | ob |
| 3730 | 23 | 6 | -0.950000 | -7.175957657  | 26.726359004  | -1.012582885 | 1 | 0 | 1 | # | oh |
| 3731 | 23 | 3 | -1.050000 | -9.843781651  | 26.723323030  | -3.061482417 | 1 | 0 | 1 | # | ob |
| 3732 | 23 | 6 | -0.950000 | -9.764307657  | 22.271809004  | -1.012582885 | 1 | 0 | 1 | # | oh |
| 3733 | 23 | 3 | -1.050000 | -7.255431651  | 22.268773030  | -3.061482417 | 1 | 0 | 1 | # | ob |
| 3734 | 23 | 3 | -1.050000 | -6.158594487  | 19.499100680  | 1.033631378  | 1 | 0 | 1 | # | ob |
| 3735 | 23 | 3 | -1.050000 | -10.199889092 | 24.133139700  | 3.233079711  | 1 | 0 | 1 | # | ob |
| 3736 | 23 | 3 | -1.050000 | -6.783735345  | 23.950251481  | -1.033422068 | 1 | 0 | 1 | # | ob |
| 3737 | 23 | 3 | -1.050000 | -7.918232736  | 19.668746126  | -3.231846262 | 1 | 0 | 1 | # | ob |
| 3738 | 23 | 7 | 2.100000  | -6.130402986  | 19.345319204  | 2.662777170  | 1 | 0 | 1 | # | st |
| 3739 | 23 | 7 | 2.100000  | -6.811372226  | 23.791570782  | -2.661798097 | 1 | 0 | 1 | # | st |
| 3740 | 23 | 7 | 2.100000  | -9.399697014  | 25.200180796  | -2.662777170 | 1 | 0 | 1 | # | st |
| 3741 | 23 | 7 | 2.100000  | -6.811347014  | 20.745630796  | -2.662777170 | 1 | 0 | 1 | # | st |
| 3742 | 23 | 7 | 2.100000  | -6.130377774  | 25.208479218  | 2.661798097  | 1 | 0 | 1 | # | st |
| 3743 | 23 | 7 | 2.100000  | -8.718727774  | 20.753929218  | 2.661798097  | 1 | 0 | 1 | # | st |
| 3744 | 23 | 7 | 2.100000  | -8.718752986  | 23.799869204  | 2.662777170  | 1 | 0 | 1 | # | st |
| 3745 | 23 | 7 | 2.100000  | -9.399722226  | 19.337020782  | -2.661798097 | 1 | 0 | 1 | # | st |
| 3746 | 23 | 1 | 1.575000  | -7.764844971  | -27.434438432 | 0.000270632  | 1 | 1 | 1 | # | ao |
| 3747 | 23 | 1 | 1.575000  | -10.353194971 | -22.979888432 | 0.000270632  | 1 | 1 | 1 | # | ao |
| 3748 | 23 | 1 | 1.575000  | -7.765255029  | -21.474661568 | -0.000270632 | 1 | 1 | 1 | # | ao |
| 3749 | 23 | 1 | 1.575000  | -5.176905029  | -25.929211568 | -0.000270632 | 1 | 1 | 1 | # | ao |

|      |    |   |           |               |               |              |   |   |   |   |     |
|------|----|---|-----------|---------------|---------------|--------------|---|---|---|---|-----|
| 3750 | 23 | 2 | 0.425000  | -6.618749128  | -24.451832678 | 1.486115063  | 1 | 1 | 1 | # | ho  |
| 3751 | 23 | 2 | 0.425000  | -9.207099128  | 26.730017322  | 1.486115063  | 1 | 0 | 1 | # | ho  |
| 3752 | 23 | 2 | 0.425000  | -8.911350872  | -24.457267322 | -1.486115063 | 1 | 1 | 1 | # | ho  |
| 3753 | 23 | 2 | 0.425000  | -6.323000872  | -20.002717322 | -1.486115063 | 1 | 1 | 1 | # | ho  |
| 3754 | 23 | 3 | -1.050000 | -9.372085345  | -27.231598519 | -1.033422068 | 1 | 1 | 1 | # | ob  |
| 3755 | 23 | 3 | -1.050000 | -5.329882736  | -22.604003874 | -3.231846262 | 1 | 1 | 1 | # | ob  |
| 3756 | 23 | 3 | -1.050000 | -6.783155513  | -26.135450680 | -1.033631378 | 1 | 1 | 1 | # | ob  |
| 3757 | 23 | 3 | -1.050000 | -7.918560908  | -21.860389700 | -3.233079711 | 1 | 1 | 1 | # | ob  |
| 3758 | 23 | 3 | -1.050000 | -9.371505513  | -21.680900680 | -1.033631378 | 1 | 1 | 1 | # | ob  |
| 3759 | 23 | 3 | -1.050000 | -8.746944487  | -22.773649320 | 1.033631378  | 1 | 1 | 1 | # | ob  |
| 3760 | 23 | 3 | -1.050000 | -5.330210908  | -26.314939700 | -3.233079711 | 1 | 1 | 1 | # | ob  |
| 3761 | 23 | 3 | -1.050000 | -8.746364655  | -26.132051481 | 1.033422068  | 1 | 1 | 1 | # | ob  |
| 3762 | 23 | 3 | -1.050000 | -7.611867264  | -21.850546126 | 3.231846262  | 1 | 1 | 1 | # | ob  |
| 3763 | 23 | 3 | -1.050000 | -6.158014655  | -21.677501481 | 1.033422068  | 1 | 1 | 1 | # | ob  |
| 3764 | 23 | 3 | -1.050000 | -10.200217264 | -26.305096126 | 3.231846262  | 1 | 1 | 1 | # | ob  |
| 3765 | 23 | 3 | -1.050000 | -7.611539092  | -27.048710300 | 3.233079711  | 1 | 1 | 1 | # | ob  |
| 3766 | 23 | 6 | -0.950000 | -8.354142343  | 26.728240996  | 1.012582885  | 1 | 0 | 1 | # | oh  |
| 3767 | 23 | 3 | -1.050000 | -5.686318349  | 26.731276970  | 3.061482417  | 1 | 0 | 1 | # | ob  |
| 3768 | 23 | 6 | -0.950000 | -5.765792343  | -24.453609004 | 1.012582885  | 1 | 1 | 1 | # | oh  |
| 3769 | 23 | 3 | -1.050000 | -8.274668349  | -24.450573030 | 3.061482417  | 1 | 1 | 1 | # | ob  |
| 3770 | 23 | 4 | -0.950000 | -7.175957657  | -20.000940996 | -1.012582885 | 1 | 1 | 1 | # | oho |
| 3771 | 23 | 5 | -0.950000 | -9.843781651  | -20.003976970 | -3.061482417 | 1 | 1 | 1 | # | oht |
| 3772 | 23 | 6 | -0.950000 | -9.764307657  | -24.455490996 | -1.012582885 | 1 | 1 | 1 | # | oh  |
| 3773 | 23 | 3 | -1.050000 | -7.255431651  | -24.458526970 | -3.061482417 | 1 | 1 | 1 | # | ob  |
| 3774 | 23 | 3 | -1.050000 | -6.158594487  | -27.228199320 | 1.033631378  | 1 | 1 | 1 | # | ob  |
| 3775 | 23 | 3 | -1.050000 | -10.199889092 | -22.594160300 | 3.233079711  | 1 | 1 | 1 | # | ob  |
| 3776 | 23 | 3 | -1.050000 | -6.783735345  | -22.777048519 | -1.033422068 | 1 | 1 | 1 | # | ob  |
| 3777 | 23 | 3 | -1.050000 | -7.918232736  | -27.058553874 | -3.231846262 | 1 | 1 | 1 | # | ob  |
| 3778 | 23 | 7 | 2.100000  | -6.130402986  | -27.381980796 | 2.662777170  | 1 | 1 | 1 | # | st  |
| 3779 | 23 | 7 | 2.100000  | -6.811372226  | -22.935729218 | -2.661798097 | 1 | 1 | 1 | # | st  |
| 3780 | 23 | 7 | 2.100000  | -9.399697014  | -21.527119204 | -2.662777170 | 1 | 1 | 1 | # | st  |
| 3781 | 23 | 7 | 2.100000  | -6.811347014  | -25.981669204 | -2.662777170 | 1 | 1 | 1 | # | st  |
| 3782 | 23 | 7 | 2.100000  | -6.130377774  | -21.518820782 | 2.661798097  | 1 | 1 | 1 | # | st  |
| 3783 | 23 | 7 | 2.100000  | -8.718727774  | -25.973370782 | 2.661798097  | 1 | 1 | 1 | # | st  |
| 3784 | 23 | 7 | 2.100000  | -8.718752986  | -22.927430796 | 2.662777170  | 1 | 1 | 1 | # | st  |
| 3785 | 23 | 7 | 2.100000  | -9.399722226  | -27.390279218 | -2.661798097 | 1 | 1 | 1 | # | st  |
| 3786 | 24 | 1 | 1.575000  | -2.588144971  | 1.474661568   | 0.000270632  | 1 | 0 | 1 | # | ao  |
| 3787 | 24 | 1 | 1.575000  | -5.176494971  | 5.929211568   | 0.000270632  | 1 | 0 | 1 | # | ao  |
| 3788 | 24 | 1 | 1.575000  | -2.588555029  | 7.434438432   | -0.000270632 | 1 | 0 | 1 | # | ao  |
| 3789 | 24 | 1 | 1.575000  | -0.000205029  | 2.979888432   | -0.000270632 | 1 | 0 | 1 | # | ao  |
| 3790 | 24 | 2 | 0.425000  | -1.442049128  | 4.457267322   | 1.486115063  | 1 | 0 | 1 | # | ho  |
| 3791 | 24 | 2 | 0.425000  | -4.030399128  | 0.002717322   | 1.486115063  | 1 | 0 | 1 | # | ho  |
| 3792 | 24 | 2 | 0.425000  | -3.734650872  | 4.451832678   | -1.486115063 | 1 | 0 | 1 | # | ho  |
| 3793 | 24 | 2 | 0.425000  | -1.146300872  | 8.906382678   | -1.486115063 | 1 | 0 | 1 | # | ho  |
| 3794 | 24 | 3 | -1.050000 | -4.195385345  | 1.677501481   | -1.033422068 | 1 | 0 | 1 | # | ob  |
| 3795 | 24 | 3 | -1.050000 | -0.153182736  | 6.305096126   | -3.231846262 | 1 | 0 | 1 | # | ob  |
| 3796 | 24 | 3 | -1.050000 | -1.606455513  | 2.773649320   | -1.033631378 | 1 | 0 | 1 | # | ob  |
| 3797 | 24 | 3 | -1.050000 | -2.741860908  | 7.048710300   | -3.233079711 | 1 | 0 | 1 | # | ob  |
| 3798 | 24 | 3 | -1.050000 | -4.194805513  | 7.228199320   | -1.033631378 | 1 | 0 | 1 | # | ob  |
| 3799 | 24 | 3 | -1.050000 | -3.570244487  | 6.135450680   | 1.033631378  | 1 | 0 | 1 | # | ob  |
| 3800 | 24 | 3 | -1.050000 | -0.153510908  | 2.594160300   | -3.233079711 | 1 | 0 | 1 | # | ob  |
| 3801 | 24 | 3 | -1.050000 | -3.569664655  | 2.777048519   | 1.033422068  | 1 | 0 | 1 | # | ob  |
| 3802 | 24 | 3 | -1.050000 | -2.435167264  | 7.058553874   | 3.231846262  | 1 | 0 | 1 | # | ob  |
| 3803 | 24 | 3 | -1.050000 | -0.981314655  | 7.231598519   | 1.033422068  | 1 | 0 | 1 | # | ob  |
| 3804 | 24 | 3 | -1.050000 | -5.023517264  | 2.604003874   | 3.231846262  | 1 | 0 | 1 | # | ob  |
| 3805 | 24 | 3 | -1.050000 | -2.434839092  | 1.860389700   | 3.233079711  | 1 | 0 | 1 | # | ob  |
| 3806 | 24 | 4 | -0.950000 | -3.177442343  | 0.000940996   | 1.012582885  | 1 | 0 | 1 | # | oho |
| 3807 | 24 | 5 | -0.950000 | -0.509618349  | 0.003976970   | 3.061482417  | 1 | 0 | 1 | # | oht |
| 3808 | 24 | 6 | -0.950000 | -0.589092343  | 4.455490996   | 1.012582885  | 1 | 0 | 1 | # | oh  |
| 3809 | 24 | 3 | -1.050000 | -3.097968349  | 4.458526970   | 3.061482417  | 1 | 0 | 1 | # | ob  |
| 3810 | 24 | 6 | -0.950000 | -1.999257657  | 8.908159004   | -1.012582885 | 1 | 0 | 1 | # | oh  |
| 3811 | 24 | 3 | -1.050000 | -4.667081651  | 8.905123030   | -3.061482417 | 1 | 0 | 1 | # | ob  |
| 3812 | 24 | 6 | -0.950000 | -4.587607657  | 4.453609004   | -1.012582885 | 1 | 0 | 1 | # | oh  |
| 3813 | 24 | 3 | -1.050000 | -2.078731651  | 4.450573030   | -3.061482417 | 1 | 0 | 1 | # | ob  |
| 3814 | 24 | 3 | -1.050000 | -0.981894487  | 1.680900680   | 1.033631378  | 1 | 0 | 1 | # | ob  |
| 3815 | 24 | 3 | -1.050000 | -5.023189092  | 6.314939700   | 3.233079711  | 1 | 0 | 1 | # | ob  |
| 3816 | 24 | 3 | -1.050000 | -1.607035345  | 6.132051481   | -1.033422068 | 1 | 0 | 1 | # | ob  |
| 3817 | 24 | 3 | -1.050000 | -2.741532736  | 1.850546126   | -3.231846262 | 1 | 0 | 1 | # | ob  |
| 3818 | 24 | 7 | 2.100000  | -0.953702986  | 1.527119204   | 2.662777170  | 1 | 0 | 1 | # | st  |
| 3819 | 24 | 7 | 2.100000  | -1.634672226  | 5.973370782   | -2.661798097 | 1 | 0 | 1 | # | st  |
| 3820 | 24 | 7 | 2.100000  | -4.222997014  | 7.381980796   | -2.662777170 | 1 | 0 | 1 | # | st  |
| 3821 | 24 | 7 | 2.100000  | -1.634647014  | 2.927430796   | -2.662777170 | 1 | 0 | 1 | # | st  |
| 3822 | 24 | 7 | 2.100000  | -0.953677774  | 7.390279218   | 2.661798097  | 1 | 0 | 1 | # | st  |
| 3823 | 24 | 7 | 2.100000  | -3.542027774  | 2.935729218   | 2.661798097  | 1 | 0 | 1 | # | st  |
| 3824 | 24 | 7 | 2.100000  | -3.542052986  | 5.981669204   | 2.662777170  | 1 | 0 | 1 | # | st  |
| 3825 | 24 | 7 | 2.100000  | -4.223022226  | 1.518820782   | -2.661798097 | 1 | 0 | 1 | # | st  |
| 3826 | 24 | 1 | 1.575000  | -2.588144971  | 10.383761568  | 0.000270632  | 1 | 0 | 1 | # | ao  |
| 3827 | 24 | 1 | 1.575000  | -5.176494971  | 14.838311568  | 0.000270632  | 1 | 0 | 1 | # | ao  |
| 3828 | 24 | 1 | 1.575000  | -2.588555029  | 16.343538432  | -0.000270632 | 1 | 0 | 1 | # | ao  |
| 3829 | 24 | 1 | 1.575000  | -0.000205029  | 11.888988432  | -0.000270632 | 1 | 0 | 1 | # | ao  |
| 3830 | 24 | 2 | 0.425000  | -1.442049128  | 13.366367322  | 1.486115063  | 1 | 0 | 1 | # | ho  |
| 3831 | 24 | 2 | 0.425000  | -4.030399128  | 8.911817322   | 1.486115063  | 1 | 0 | 1 | # | ho  |
| 3832 | 24 | 2 | 0.425000  | -3.734650872  | 13.360932678  | -1.486115063 | 1 | 0 | 1 | # | ho  |
| 3833 | 24 | 2 | 0.425000  | -1.146300872  | 17.815482678  | -1.486115063 | 1 | 0 | 1 | # | ho  |
| 3834 | 24 | 3 | -1.050000 | -4.195385345  | 10.586601481  | -1.033422068 | 1 | 0 | 1 | # | ob  |
| 3835 | 24 | 3 | -1.050000 | -0.153182736  | 15.214196126  | -3.231846262 | 1 | 0 | 1 | # | ob  |
| 3836 | 24 | 3 | -1.050000 | -1.606455513  | 11.682749320  | -1.033631378 | 1 | 0 | 1 | # | ob  |
| 3837 | 24 | 3 | -1.050000 | -2.741860908  | 15.957810300  | -3.233079711 | 1 | 0 | 1 | # | ob  |
| 3838 | 24 | 3 | -1.050000 | -4.194805513  | 16.137299320  | -1.033631378 | 1 | 0 | 1 | # | ob  |
| 3839 | 24 | 3 | -1.050000 | -3.570244487  | 15.044550680  | 1.033631378  | 1 | 0 | 1 | # | ob  |
| 3840 | 24 | 3 | -1.050000 | -0.153510908  | 11.503260300  | -3.233079711 | 1 | 0 | 1 | # | ob  |
| 3841 | 24 | 3 | -1.050000 | -3.569664655  | 11.686148519  | 1.033422068  | 1 | 0 | 1 | # | ob  |
| 3842 | 24 | 3 | -1.050000 | -2.435167264  | 15.967653874  | 3.231846262  | 1 | 0 | 1 | # | ob  |



|      |    |   |           |              |               |              |   |   |   |   |    |
|------|----|---|-----------|--------------|---------------|--------------|---|---|---|---|----|
| 3843 | 24 | 3 | -1.050000 | -0.981314655 | 16.140698519  | 1.033422068  | 1 | 0 | 1 | # | ob |
| 3844 | 24 | 3 | -1.050000 | -5.023517264 | 11.513103874  | 3.231846262  | 1 | 0 | 1 | # | ob |
| 3845 | 24 | 3 | -1.050000 | -2.434839092 | 10.769489700  | 3.233079711  | 1 | 0 | 1 | # | ob |
| 3846 | 24 | 6 | -0.950000 | -3.177442343 | 8.910040996   | 1.012582885  | 1 | 0 | 1 | # | oh |
| 3847 | 24 | 3 | -1.050000 | -0.509618349 | 8.913076970   | 3.061482417  | 1 | 0 | 1 | # | ob |
| 3848 | 24 | 6 | -0.950000 | -0.589092343 | 13.364590996  | 1.012582885  | 1 | 0 | 1 | # | oh |
| 3849 | 24 | 3 | -1.050000 | -3.097968349 | 13.367626970  | 3.061482417  | 1 | 0 | 1 | # | ob |
| 3850 | 24 | 6 | -0.950000 | -1.999257657 | 17.817259004  | -1.012582885 | 1 | 0 | 1 | # | oh |
| 3851 | 24 | 3 | -1.050000 | -4.667081651 | 17.814223030  | -3.061482417 | 1 | 0 | 1 | # | ob |
| 3852 | 24 | 6 | -0.950000 | -4.587607657 | 13.362709004  | -1.012582885 | 1 | 0 | 1 | # | oh |
| 3853 | 24 | 3 | -1.050000 | -2.078731651 | 13.359673030  | -3.061482417 | 1 | 0 | 1 | # | ob |
| 3854 | 24 | 3 | -1.050000 | -0.981894487 | 10.590000680  | 1.033631378  | 1 | 0 | 1 | # | ob |
| 3855 | 24 | 3 | -1.050000 | -5.023189092 | 15.224039700  | 3.233079711  | 1 | 0 | 1 | # | ob |
| 3856 | 24 | 3 | -1.050000 | -1.607035345 | 15.041151481  | -1.033422068 | 1 | 0 | 1 | # | ob |
| 3857 | 24 | 3 | -1.050000 | -2.741532736 | 10.759646126  | -3.231846262 | 1 | 0 | 1 | # | ob |
| 3858 | 24 | 7 | 2.100000  | -0.953702986 | 10.436219204  | 2.662777170  | 1 | 0 | 1 | # | st |
| 3859 | 24 | 7 | 2.100000  | -1.634672226 | 14.882470782  | -2.661798097 | 1 | 0 | 1 | # | st |
| 3860 | 24 | 7 | 2.100000  | -4.222997014 | 16.291080796  | -2.662777170 | 1 | 0 | 1 | # | st |
| 3861 | 24 | 7 | 2.100000  | -1.634647014 | 11.836530796  | -2.662777170 | 1 | 0 | 1 | # | st |
| 3862 | 24 | 7 | 2.100000  | -0.953677774 | 16.299379218  | 2.661798097  | 1 | 0 | 1 | # | st |
| 3863 | 24 | 7 | 2.100000  | -3.542027774 | 11.844829218  | 2.661798097  | 1 | 0 | 1 | # | st |
| 3864 | 24 | 7 | 2.100000  | -3.542052986 | 14.890769204  | 2.662777170  | 1 | 0 | 1 | # | st |
| 3865 | 24 | 7 | 2.100000  | -4.223022226 | 10.427920782  | -2.661798097 | 1 | 0 | 1 | # | st |
| 3866 | 24 | 1 | 1.575000  | -2.588144971 | 19.292861568  | 0.000270632  | 1 | 0 | 1 | # | ao |
| 3867 | 24 | 1 | 1.575000  | -5.176494971 | 23.747411568  | 0.000270632  | 1 | 0 | 1 | # | ao |
| 3868 | 24 | 1 | 1.575000  | -2.588555029 | 25.252638432  | -0.000270632 | 1 | 0 | 1 | # | ao |
| 3869 | 24 | 1 | 1.575000  | -0.000205029 | 20.798088432  | -0.000270632 | 1 | 0 | 1 | # | ao |
| 3870 | 24 | 2 | 0.425000  | -1.442049128 | 22.275467322  | 1.486115063  | 1 | 0 | 1 | # | ho |
| 3871 | 24 | 2 | 0.425000  | -4.030399128 | 17.820917322  | 1.486115063  | 1 | 0 | 1 | # | ho |
| 3872 | 24 | 2 | 0.425000  | -3.734650872 | 22.270032678  | -1.486115063 | 1 | 0 | 1 | # | ho |
| 3873 | 24 | 2 | 0.425000  | -1.146300872 | 26.724582678  | -1.486115063 | 1 | 0 | 1 | # | ho |
| 3874 | 24 | 3 | -1.050000 | -4.195385345 | 19.495701481  | -1.033422068 | 1 | 0 | 1 | # | ob |
| 3875 | 24 | 3 | -1.050000 | -0.153182736 | 24.123296126  | -3.231846262 | 1 | 0 | 1 | # | ob |
| 3876 | 24 | 3 | -1.050000 | -1.606455513 | 20.591849320  | -1.033631378 | 1 | 0 | 1 | # | ob |
| 3877 | 24 | 3 | -1.050000 | -2.741860908 | 24.866910300  | -3.233079711 | 1 | 0 | 1 | # | ob |
| 3878 | 24 | 3 | -1.050000 | -4.194805513 | 25.046399320  | -1.033631378 | 1 | 0 | 1 | # | ob |
| 3879 | 24 | 3 | -1.050000 | -3.570244487 | 23.953650680  | 1.033631378  | 1 | 0 | 1 | # | ob |
| 3880 | 24 | 3 | -1.050000 | -0.153510908 | 20.412360300  | -3.233079711 | 1 | 0 | 1 | # | ob |
| 3881 | 24 | 3 | -1.050000 | -3.569664655 | 20.595248519  | 1.033422068  | 1 | 0 | 1 | # | ob |
| 3882 | 24 | 3 | -1.050000 | -2.435167264 | 24.876753874  | 3.231846262  | 1 | 0 | 1 | # | ob |
| 3883 | 24 | 3 | -1.050000 | -0.981314655 | 25.049798519  | 1.033422068  | 1 | 0 | 1 | # | ob |
| 3884 | 24 | 3 | -1.050000 | -5.023517264 | 20.422203874  | 3.231846262  | 1 | 0 | 1 | # | ob |
| 3885 | 24 | 3 | -1.050000 | -2.434839092 | 19.678589700  | 3.233079711  | 1 | 0 | 1 | # | ob |
| 3886 | 24 | 6 | -0.950000 | -3.177442343 | 17.819140996  | 1.012582885  | 1 | 0 | 1 | # | oh |
| 3887 | 24 | 3 | -1.050000 | -0.509618349 | 17.822176970  | 3.061482417  | 1 | 0 | 1 | # | ob |
| 3888 | 24 | 6 | -0.950000 | -0.589092343 | 22.273690996  | 1.012582885  | 1 | 0 | 1 | # | oh |
| 3889 | 24 | 3 | -1.050000 | -3.097968349 | 22.276726970  | 3.061482417  | 1 | 0 | 1 | # | ob |
| 3890 | 24 | 6 | -0.950000 | -1.999257657 | 26.726359004  | -1.012582885 | 1 | 0 | 1 | # | oh |
| 3891 | 24 | 3 | -1.050000 | -4.667081651 | 26.723323030  | -3.061482417 | 1 | 0 | 1 | # | ob |
| 3892 | 24 | 6 | -0.950000 | -4.587607657 | 22.271809004  | -1.012582885 | 1 | 0 | 1 | # | oh |
| 3893 | 24 | 3 | -1.050000 | -2.078731651 | 22.268773030  | -3.061482417 | 1 | 0 | 1 | # | ob |
| 3894 | 24 | 3 | -1.050000 | -0.981894487 | 19.499100680  | 1.033631378  | 1 | 0 | 1 | # | ob |
| 3895 | 24 | 3 | -1.050000 | -5.023189092 | 24.133139700  | 3.233079711  | 1 | 0 | 1 | # | ob |
| 3896 | 24 | 3 | -1.050000 | -1.607035345 | 23.950251481  | -1.033422068 | 1 | 0 | 1 | # | ob |
| 3897 | 24 | 3 | -1.050000 | -2.741532736 | 19.668746126  | -3.231846262 | 1 | 0 | 1 | # | ob |
| 3898 | 24 | 7 | 2.100000  | -0.953702986 | 19.345319204  | 2.662777170  | 1 | 0 | 1 | # | st |
| 3899 | 24 | 7 | 2.100000  | -1.634672226 | 23.791570782  | -2.661798097 | 1 | 0 | 1 | # | st |
| 3900 | 24 | 7 | 2.100000  | -4.222997014 | 25.200180796  | -2.662777170 | 1 | 0 | 1 | # | st |
| 3901 | 24 | 7 | 2.100000  | -1.634647014 | 20.745630796  | -2.662777170 | 1 | 0 | 1 | # | st |
| 3902 | 24 | 7 | 2.100000  | -0.953677774 | 25.208479218  | 2.661798097  | 1 | 0 | 1 | # | st |
| 3903 | 24 | 7 | 2.100000  | -3.542027774 | 20.753929218  | 2.661798097  | 1 | 0 | 1 | # | st |
| 3904 | 24 | 7 | 2.100000  | -3.542052986 | 23.799869204  | 2.662777170  | 1 | 0 | 1 | # | st |
| 3905 | 24 | 7 | 2.100000  | -4.223022226 | 19.337020782  | -2.661798097 | 1 | 0 | 1 | # | st |
| 3906 | 24 | 1 | 1.575000  | -2.588144971 | -27.434438432 | 0.000270632  | 1 | 1 | 1 | # | ao |
| 3907 | 24 | 1 | 1.575000  | -5.176494971 | -22.979888432 | 0.000270632  | 1 | 1 | 1 | # | ao |
| 3908 | 24 | 1 | 1.575000  | -2.588555029 | -21.474661568 | -0.000270632 | 1 | 1 | 1 | # | ao |
| 3909 | 24 | 1 | 1.575000  | -0.000205029 | -25.929211568 | -0.000270632 | 1 | 1 | 1 | # | ao |
| 3910 | 24 | 2 | 0.425000  | -1.442049128 | -24.451832678 | 1.486115063  | 1 | 1 | 1 | # | ho |
| 3911 | 24 | 2 | 0.425000  | -4.030399128 | 26.730017322  | 1.486115063  | 1 | 0 | 1 | # | ho |
| 3912 | 24 | 2 | 0.425000  | -3.734650872 | -24.457267322 | -1.486115063 | 1 | 1 | 1 | # | ho |
| 3913 | 24 | 2 | 0.425000  | -1.146300872 | -20.002717322 | -1.486115063 | 1 | 1 | 1 | # | ho |
| 3914 | 24 | 3 | -1.050000 | -4.195385345 | -27.231598519 | -1.033422068 | 1 | 1 | 1 | # | ob |
| 3915 | 24 | 3 | -1.050000 | -0.153182736 | -22.604003874 | -3.231846262 | 1 | 1 | 1 | # | ob |
| 3916 | 24 | 3 | -1.050000 | -1.606455513 | -26.135450680 | -1.033631378 | 1 | 1 | 1 | # | ob |
| 3917 | 24 | 3 | -1.050000 | -2.741860908 | -21.860389700 | -3.233079711 | 1 | 1 | 1 | # | ob |
| 3918 | 24 | 3 | -1.050000 | -4.194805513 | -21.680900680 | -1.033631378 | 1 | 1 | 1 | # | ob |
| 3919 | 24 | 3 | -1.050000 | -3.570244487 | -22.773649320 | 1.033631378  | 1 | 1 | 1 | # | ob |
| 3920 | 24 | 3 | -1.050000 | -0.153510908 | -26.314939700 | -3.233079711 | 1 | 1 | 1 | # | ob |
| 3921 | 24 | 3 | -1.050000 | -3.569664655 | -26.132051481 | 1.033422068  | 1 | 1 | 1 | # | ob |
| 3922 | 24 | 3 | -1.050000 | -2.435167264 | -21.850546126 | 3.231846262  | 1 | 1 | 1 | # | ob |
| 3923 | 24 | 3 | -1.050000 | -0.981314655 | -21.677501481 | 1.033422068  | 1 | 1 | 1 | # | ob |
| 3924 | 24 | 3 | -1.050000 | -5.023517264 | -26.305096126 | 3.231846262  | 1 | 1 | 1 | # | ob |
| 3925 | 24 | 3 | -1.050000 | -2.434839092 | -27.048710300 | 3.233079711  | 1 | 1 | 1 | # | ob |
| 3926 | 24 | 6 | -0.950000 | -3.177442343 | 26.728240996  | 1.012582885  | 1 | 0 | 1 | # | oh |
| 3927 | 24 | 3 | -1.050000 | -0.509618349 | 26.731276970  | 3.061482417  | 1 | 0 | 1 | # | ob |
| 3928 | 24 | 6 | -0.950000 | -0.589092343 | -24.453609004 | 1.012582885  | 1 | 1 | 1 | # | oh |
| 3929 | 24 | 3 | -1.050000 | -3.097968349 | -24.450573030 | 3.061482417  | 1 | 1 | 1 | # | ob |
| 3930 | 24 | 4 | -0.950000 | -1.999257657 | -20.000940996 | -1.012582885 | 1 | 1 | 1 | # | oh |
| 3931 | 24 | 5 | -0.950000 | -4.667081651 | -20.003976970 | -3.061482417 | 1 | 1 | 1 | # | oh |
| 3932 | 24 | 6 | -0.950000 | -4.587607657 | -24.455490996 | -1.012582885 | 1 | 1 | 1 | # | oh |
| 3933 | 24 | 3 | -1.050000 | -2.078731651 | -24.458526970 | -3.061482417 | 1 | 1 | 1 | # | ob |
| 3934 | 24 | 3 | -1.050000 | -0.981894487 | -27.228199320 | 1.033631378  | 1 | 1 | 1 | # | ob |
| 3935 | 24 | 3 | -1.050000 | -5.023189092 | -22.594160300 | 3.233079711  | 1 | 1 | 1 | # | ob |

|      |    |   |           |               |               |               |   |   |   |   |     |
|------|----|---|-----------|---------------|---------------|---------------|---|---|---|---|-----|
| 3936 | 24 | 3 | -1.050000 | -1.607035345  | -22.777048519 | -1.033422068  | 1 | 1 | 1 | # | ob  |
| 3937 | 24 | 3 | -1.050000 | -2.741532736  | -27.058553874 | -3.231846262  | 1 | 1 | 1 | # | ob  |
| 3938 | 24 | 7 | 2.100000  | -0.953702986  | -27.381980796 | 2.662777170   | 1 | 1 | 1 | # | st  |
| 3939 | 24 | 7 | 2.100000  | -1.634672226  | -22.935729218 | -2.661798097  | 1 | 1 | 1 | # | st  |
| 3940 | 24 | 7 | 2.100000  | -4.222997014  | -21.527119204 | -2.662777170  | 1 | 1 | 1 | # | st  |
| 3941 | 24 | 7 | 2.100000  | -1.634647014  | -25.981669204 | -2.662777170  | 1 | 1 | 1 | # | st  |
| 3942 | 24 | 7 | 2.100000  | -0.953677774  | -21.518820782 | 2.661798097   | 1 | 1 | 1 | # | st  |
| 3943 | 24 | 7 | 2.100000  | -3.542027774  | -25.973370782 | 2.661798097   | 1 | 1 | 1 | # | st  |
| 3944 | 24 | 7 | 2.100000  | -3.542052986  | -22.927430796 | 2.662777170   | 1 | 1 | 1 | # | st  |
| 3945 | 24 | 7 | 2.100000  | -4.223022226  | -27.390279218 | -2.661798097  | 1 | 1 | 1 | # | st  |
| 3946 | 25 | 5 | -0.950000 | 4.737466427   | -19.680858114 | 11.921220950  | 0 | 1 | 0 | # | oht |
| 3947 | 25 | 5 | -0.950000 | 0.304938203   | -0.272172439  | 6.530772887   | 0 | 0 | 0 | # | oht |
| 3948 | 25 | 2 | 0.425000  | 4.999988619   | -1.054326608  | 12.429570537  | 0 | 0 | 0 | # | ho  |
| 3949 | 25 | 2 | 0.425000  | 4.863848964   | -18.596754758 | 11.719113544  | 0 | 1 | 0 | # | ho  |
| 3950 | 25 | 2 | 0.425000  | 0.113048915   | -19.012312375 | 5.968636949   | 0 | 1 | 0 | # | ho  |
| 3951 | 26 | 5 | -0.950000 | 9.914166427   | -19.680858114 | 11.921220950  | 0 | 1 | 0 | # | oht |
| 3952 | 26 | 5 | -0.950000 | 5.481638203   | -0.272172439  | 6.530772887   | 0 | 0 | 0 | # | oht |
| 3953 | 26 | 2 | 0.425000  | 5.133272253   | -1.308055357  | 6.336639507   | 0 | 0 | 0 | # | ho  |
| 3954 | 26 | 2 | 0.425000  | 10.176688619  | -1.054326608  | 12.429570537  | 0 | 0 | 0 | # | ho  |
| 3955 | 26 | 2 | 0.425000  | 10.040548964  | -18.596754758 | 11.719113544  | 0 | 1 | 0 | # | ho  |
| 3956 | 26 | 2 | 0.425000  | 5.289748915   | -19.012312375 | 5.968636949   | 0 | 1 | 0 | # | ho  |
| 3957 | 27 | 5 | -0.950000 | 15.090866427  | -19.680858114 | 11.921220950  | 0 | 1 | 0 | # | oht |
| 3958 | 27 | 5 | -0.950000 | 10.658338203  | -0.272172439  | 6.530772887   | 0 | 0 | 0 | # | oht |
| 3959 | 27 | 2 | 0.425000  | 10.309972253  | -1.308055357  | 6.336639507   | 0 | 0 | 0 | # | ho  |
| 3960 | 27 | 2 | 0.425000  | 15.353388619  | -1.054326608  | 12.429570537  | 0 | 0 | 0 | # | ho  |
| 3961 | 27 | 2 | 0.425000  | 15.217248964  | -18.596754758 | 11.719113544  | 0 | 1 | 0 | # | ho  |
| 3962 | 27 | 2 | 0.425000  | 10.466448915  | -19.012312375 | 5.968636949   | 0 | 1 | 0 | # | ho  |
| 3963 | 28 | 5 | -0.950000 | -10.792633573 | -19.680858114 | 11.921220950  | 1 | 1 | 0 | # | oht |
| 3964 | 28 | 5 | -0.950000 | -15.225161797 | -0.272172439  | 6.530772887   | 1 | 0 | 0 | # | oht |
| 3965 | 28 | 2 | 0.425000  | 15.486672253  | -1.308055357  | 6.336639507   | 0 | 0 | 0 | # | ho  |
| 3966 | 28 | 2 | 0.425000  | -10.530111381 | -1.054326608  | 12.429570537  | 1 | 0 | 0 | # | ho  |
| 3967 | 28 | 2 | 0.425000  | -10.666251036 | -18.596754758 | 11.719113544  | 1 | 1 | 0 | # | ho  |
| 3968 | 28 | 2 | 0.425000  | -15.417051085 | -19.012312375 | 5.968636949   | 1 | 1 | 0 | # | ho  |
| 3969 | 29 | 5 | -0.950000 | -5.615933573  | -19.680858114 | 11.921220950  | 1 | 1 | 0 | # | oht |
| 3970 | 29 | 5 | -0.950000 | -10.048461797 | -0.272172439  | 6.530772887   | 1 | 0 | 0 | # | oht |
| 3971 | 29 | 2 | 0.425000  | -10.396827747 | -1.308055357  | 6.336639507   | 1 | 0 | 0 | # | ho  |
| 3972 | 29 | 2 | 0.425000  | -5.353411381  | -1.054326608  | 12.429570537  | 1 | 0 | 0 | # | ho  |
| 3973 | 29 | 2 | 0.425000  | -5.489551036  | -18.596754758 | 11.719113544  | 1 | 1 | 0 | # | ho  |
| 3974 | 29 | 2 | 0.425000  | -10.240351085 | -19.012312375 | 5.968636949   | 1 | 1 | 0 | # | ho  |
| 3975 | 30 | 5 | -0.950000 | -0.439233573  | -19.680858114 | 11.921220950  | 1 | 1 | 0 | # | oht |
| 3976 | 30 | 5 | -0.950000 | -4.871761797  | -0.272172439  | 6.530772887   | 1 | 0 | 0 | # | oht |
| 3977 | 30 | 2 | 0.425000  | -5.220127747  | -1.308055357  | 6.336639507   | 1 | 0 | 0 | # | ho  |
| 3978 | 30 | 2 | 0.425000  | -0.176711381  | -1.054326608  | 12.429570537  | 1 | 0 | 0 | # | ho  |
| 3979 | 30 | 2 | 0.425000  | -0.312851036  | -18.596754758 | 11.719113544  | 1 | 1 | 0 | # | ho  |
| 3980 | 30 | 2 | 0.425000  | -5.063651085  | -19.012312375 | 5.968636949   | 1 | 1 | 0 | # | ho  |
| 3981 | 31 | 2 | 0.425000  | -0.043427747  | -1.308055357  | 6.336639507   | 1 | 0 | 0 | # | ho  |
| 3982 | 32 | 2 | 0.425000  | -0.043427747  | -1.308055357  | 15.669139507  | 1 | 0 | 0 | # | ho  |
| 3983 | 33 | 2 | 0.425000  | -0.043427747  | -1.308055357  | -12.328360493 | 1 | 0 | 1 | # | ho  |
| 3984 | 34 | 2 | 0.425000  | -0.043427747  | -1.308055357  | -2.995860493  | 1 | 0 | 1 | # | ho  |

Bonds

|    |   |      |      |
|----|---|------|------|
| 1  | 1 | 5    | 23   |
| 2  | 2 | 6    | 21   |
| 3  | 1 | 7    | 27   |
| 4  | 1 | 8    | 25   |
| 5  | 3 | 3948 | 22   |
| 6  | 1 | 45   | 63   |
| 7  | 1 | 46   | 61   |
| 8  | 1 | 47   | 67   |
| 9  | 1 | 48   | 65   |
| 10 | 1 | 85   | 103  |
| 11 | 1 | 86   | 101  |
| 12 | 1 | 87   | 107  |
| 13 | 1 | 88   | 105  |
| 14 | 1 | 125  | 143  |
| 15 | 1 | 126  | 141  |
| 16 | 1 | 127  | 147  |
| 17 | 2 | 128  | 145  |
| 18 | 3 | 3950 | 146  |
| 19 | 3 | 164  | 161  |
| 20 | 3 | 3982 | 162  |
| 21 | 3 | 163  | 1017 |
| 22 | 3 | 165  | 1141 |
| 23 | 1 | 170  | 188  |
| 24 | 2 | 171  | 186  |
| 25 | 1 | 172  | 192  |
| 26 | 1 | 173  | 190  |
| 27 | 3 | 3954 | 187  |
| 28 | 1 | 210  | 228  |
| 29 | 1 | 211  | 226  |
| 30 | 1 | 212  | 232  |
| 31 | 1 | 213  | 230  |
| 32 | 1 | 250  | 268  |
| 33 | 1 | 251  | 266  |
| 34 | 1 | 252  | 272  |
| 35 | 1 | 253  | 270  |
| 36 | 1 | 290  | 308  |
| 37 | 1 | 291  | 306  |
| 38 | 1 | 292  | 312  |
| 39 | 2 | 293  | 310  |
| 40 | 3 | 3956 | 311  |
| 41 | 3 | 330  | 326  |

42 3 328 327  
43 3 329 1182  
44 3 331 1306  
45 1 336 354  
46 2 337 352  
47 1 338 358  
48 1 339 356  
49 3 3960 353  
50 1 376 394  
51 1 377 392  
52 1 378 398  
53 1 379 396  
54 1 416 434  
55 1 417 432  
56 1 418 438  
57 1 419 436  
58 1 456 474  
59 1 457 472  
60 1 458 478  
61 2 459 476  
62 3 3962 477  
63 3 496 492  
64 3 494 493  
65 3 495 1348  
66 3 497 1472  
67 1 502 520  
68 2 503 518  
69 1 504 524  
70 1 505 522  
71 3 3966 519  
72 1 542 560  
73 1 543 558  
74 1 544 564  
75 1 545 562  
76 1 582 600  
77 1 583 598  
78 1 584 604  
79 1 585 602  
80 1 622 640  
81 1 623 638  
82 1 624 644  
83 2 625 642  
84 3 3968 643  
85 3 662 658  
86 3 660 659  
87 3 661 1514  
88 3 663 1638  
89 1 668 686  
90 2 669 684  
91 1 670 690  
92 1 671 688  
93 3 3972 685  
94 1 708 726  
95 1 709 724  
96 1 710 730  
97 1 711 728  
98 1 748 766  
99 1 749 764  
100 1 750 770  
101 1 751 768  
102 1 788 806  
103 1 789 804  
104 1 790 810  
105 2 791 808  
106 3 3974 809  
107 3 828 824  
108 3 826 825  
109 3 827 1680  
110 3 829 1804  
111 1 834 852  
112 2 835 850  
113 1 836 856  
114 1 837 854  
115 3 3978 851  
116 1 874 892  
117 1 875 890  
118 1 876 896  
119 1 877 894  
120 1 914 932  
121 1 915 930  
122 1 916 936  
123 1 917 934  
124 1 954 972  
125 1 955 970  
126 1 956 976  
127 2 957 974  
128 3 3980 975  
129 3 994 990  
130 3 992 991  
131 3 993 1846  
132 3 995 1970  
133 1 1000 1018  
134 2 1001 1016

135 1 1002 1022  
136 1 1003 1020  
137 1 1040 1058  
138 1 1041 1056  
139 1 1042 1062  
140 1 1043 1060  
141 1 1080 1098  
142 1 1081 1096  
143 1 1082 1102  
144 1 1083 1100  
145 1 1120 1138  
146 1 1121 1136  
147 1 1122 1142  
148 2 1123 1140  
149 3 1159 1156  
150 3 3983 1157  
151 3 1158 2012  
152 3 1160 2136  
153 1 1165 1183  
154 2 1166 1181  
155 1 1167 1187  
156 1 1168 1185  
157 1 1205 1223  
158 1 1206 1221  
159 1 1207 1227  
160 1 1208 1225  
161 1 1245 1263  
162 1 1246 1261  
163 1 1247 1267  
164 1 1248 1265  
165 1 1285 1303  
166 1 1286 1301  
167 1 1287 1307  
168 2 1288 1305  
169 3 1325 1321  
170 3 1323 1322  
171 3 1324 2177  
172 3 1326 2301  
173 1 1331 1349  
174 2 1332 1347  
175 1 1333 1353  
176 1 1334 1351  
177 1 1371 1389  
178 1 1372 1387  
179 1 1373 1393  
180 1 1374 1391  
181 1 1411 1429  
182 1 1412 1427  
183 1 1413 1433  
184 1 1414 1431  
185 1 1451 1469  
186 1 1452 1467  
187 1 1453 1473  
188 2 1454 1471  
189 3 1491 1487  
190 3 1489 1488  
191 3 1490 2343  
192 3 1492 2467  
193 1 1497 1515  
194 2 1498 1513  
195 1 1499 1519  
196 1 1500 1517  
197 1 1537 1555  
198 1 1538 1553  
199 1 1539 1559  
200 1 1540 1557  
201 1 1577 1595  
202 1 1578 1593  
203 1 1579 1599  
204 1 1580 1597  
205 1 1617 1635  
206 1 1618 1633  
207 1 1619 1639  
208 2 1620 1637  
209 3 1657 1653  
210 3 1655 1654  
211 3 1656 2509  
212 3 1658 2633  
213 1 1663 1681  
214 2 1664 1679  
215 1 1665 1685  
216 1 1666 1683  
217 1 1703 1721  
218 1 1704 1719  
219 1 1705 1725  
220 1 1706 1723  
221 1 1743 1761  
222 1 1744 1759  
223 1 1745 1765  
224 1 1746 1763  
225 1 1783 1801  
226 1 1784 1799  
227 1 1785 1805

228 2 1786 1803  
229 3 1823 1819  
230 3 1821 1820  
231 3 1822 2675  
232 3 1824 2799  
233 1 1829 1847  
234 2 1830 1845  
235 1 1831 1851  
236 1 1832 1849  
237 1 1869 1887  
238 1 1870 1885  
239 1 1871 1891  
240 1 1872 1889  
241 1 1909 1927  
242 1 1910 1925  
243 1 1911 1931  
244 1 1912 1929  
245 1 1949 1967  
246 1 1950 1965  
247 1 1951 1971  
248 2 1952 1969  
249 3 1989 1985  
250 3 1987 1986  
251 3 1988 2841  
252 3 1990 2965  
253 1 1995 2013  
254 2 1996 2011  
255 1 1997 2017  
256 1 1998 2015  
257 1 2035 2053  
258 1 2036 2051  
259 1 2037 2057  
260 1 2038 2055  
261 1 2075 2093  
262 1 2076 2091  
263 1 2077 2097  
264 1 2078 2095  
265 1 2115 2133  
266 1 2116 2131  
267 1 2117 2137  
268 2 2118 2135  
269 3 2154 2151  
270 3 3984 2152  
271 3 2153 3007  
272 3 2155 3131  
273 1 2160 2178  
274 2 2161 2176  
275 1 2162 2182  
276 1 2163 2180  
277 1 2200 2218  
278 1 2201 2216  
279 1 2202 2222  
280 1 2203 2220  
281 1 2240 2258  
282 1 2241 2256  
283 1 2242 2262  
284 1 2243 2260  
285 1 2280 2298  
286 1 2281 2296  
287 1 2282 2302  
288 2 2283 2300  
289 3 2320 2316  
290 3 2318 2317  
291 3 2319 3167  
292 3 2321 3291  
293 1 2326 2344  
294 2 2327 2342  
295 1 2328 2348  
296 1 2329 2346  
297 1 2366 2384  
298 1 2367 2382  
299 1 2368 2388  
300 1 2369 2386  
301 1 2406 2424  
302 1 2407 2422  
303 1 2408 2428  
304 1 2409 2426  
305 1 2446 2464  
306 1 2447 2462  
307 1 2448 2468  
308 2 2449 2466  
309 3 2486 2482  
310 3 2484 2483  
311 3 2485 3327  
312 3 2487 3451  
313 1 2492 2510  
314 2 2493 2508  
315 1 2494 2514  
316 1 2495 2512  
317 1 2532 2550  
318 1 2533 2548  
319 1 2534 2554  
320 1 2535 2552

321 1 2572 2590  
322 1 2573 2588  
323 1 2574 2594  
324 1 2575 2592  
325 1 2612 2630  
326 1 2613 2628  
327 1 2614 2634  
328 2 2615 2632  
329 3 2652 2648  
330 3 2650 2649  
331 3 2651 3487  
332 3 2653 3611  
333 1 2658 2676  
334 2 2659 2674  
335 1 2660 2680  
336 1 2661 2678  
337 1 2698 2716  
338 1 2699 2714  
339 1 2700 2720  
340 1 2701 2718  
341 1 2738 2756  
342 1 2739 2754  
343 1 2740 2760  
344 1 2741 2758  
345 1 2778 2796  
346 1 2779 2794  
347 1 2780 2800  
348 2 2781 2798  
349 3 2818 2814  
350 3 2816 2815  
351 3 2817 3647  
352 3 2819 3771  
353 1 2824 2842  
354 2 2825 2840  
355 1 2826 2846  
356 1 2827 2844  
357 1 2864 2882  
358 1 2865 2880  
359 1 2866 2886  
360 1 2867 2884  
361 1 2904 2922  
362 1 2905 2920  
363 1 2906 2926  
364 1 2907 2924  
365 1 2944 2962  
366 1 2945 2960  
367 1 2946 2966  
368 2 2947 2964  
369 3 2984 2980  
370 3 2982 2981  
371 3 2983 3807  
372 3 2985 3931  
373 1 2990 3008  
374 2 2991 3006  
375 1 2992 3012  
376 1 2993 3010  
377 1 3030 3048  
378 1 3031 3046  
379 1 3032 3052  
380 1 3033 3050  
381 1 3070 3088  
382 1 3071 3086  
383 1 3072 3092  
384 1 3073 3090  
385 1 3110 3128  
386 1 3111 3126  
387 1 3112 3132  
388 2 3113 3130  
389 1 3150 3168  
390 2 3151 3166  
391 1 3152 3172  
392 1 3153 3170  
393 1 3190 3208  
394 1 3191 3206  
395 1 3192 3212  
396 1 3193 3210  
397 1 3230 3248  
398 1 3231 3246  
399 1 3232 3252  
400 1 3233 3250  
401 1 3270 3288  
402 1 3271 3286  
403 1 3272 3292  
404 2 3273 3290  
405 1 3310 3328  
406 2 3311 3326  
407 1 3312 3332  
408 1 3313 3330  
409 1 3350 3368  
410 1 3351 3366  
411 1 3352 3372  
412 1 3353 3370  
413 1 3390 3408

414 1 3391 3406  
 415 1 3392 3412  
 416 1 3393 3410  
 417 1 3430 3448  
 418 1 3431 3446  
 419 1 3432 3452  
 420 2 3433 3450  
 421 1 3470 3488  
 422 2 3471 3486  
 423 1 3472 3492  
 424 1 3473 3490  
 425 1 3510 3528  
 426 1 3511 3526  
 427 1 3512 3532  
 428 1 3513 3530  
 429 1 3550 3568  
 430 1 3551 3566  
 431 1 3552 3572  
 432 1 3553 3570  
 433 1 3590 3608  
 434 1 3591 3606  
 435 1 3592 3612  
 436 2 3593 3610  
 437 1 3630 3648  
 438 2 3631 3646  
 439 1 3632 3652  
 440 1 3633 3650  
 441 1 3670 3688  
 442 1 3671 3686  
 443 1 3672 3692  
 444 1 3673 3690  
 445 1 3710 3728  
 446 1 3711 3726  
 447 1 3712 3732  
 448 1 3713 3730  
 449 1 3750 3768  
 450 1 3751 3766  
 451 1 3752 3772  
 452 2 3753 3770  
 453 1 3790 3808  
 454 2 3791 3806  
 455 1 3792 3812  
 456 1 3793 3810  
 457 1 3830 3848  
 458 1 3831 3846  
 459 1 3832 3852  
 460 1 3833 3850  
 461 1 3870 3888  
 462 1 3871 3886  
 463 1 3872 3892  
 464 1 3873 3890  
 465 1 3910 3928  
 466 1 3911 3926  
 467 1 3912 3932  
 468 2 3913 3930  
 469 3 3949 3946  
 470 3 3981 3947  
 471 3 3955 3951  
 472 3 3953 3952  
 473 3 3961 3957  
 474 3 3959 3958  
 475 3 3967 3963  
 476 3 3965 3964  
 477 3 3973 3969  
 478 3 3971 3970  
 479 3 3979 3975  
 480 3 3977 3976

Angles

1 1 1 21 6  
 2 2 3948 22 33  
 3 3 4 23 5  
 4 3 167 23 5  
 5 3 3 25 8  
 6 3 41 25 8  
 7 3 2 27 7  
 8 3 833 27 7  
 9 3 3 61 46  
 10 3 41 61 46  
 11 3 44 63 45  
 12 3 207 63 45  
 13 3 43 65 48  
 14 3 81 65 48  
 15 3 42 67 47  
 16 3 873 67 47  
 17 3 43 101 86  
 18 3 81 101 86  
 19 3 84 103 85  
 20 3 247 103 85  
 21 3 83 105 88  
 22 3 121 105 88  
 23 3 82 107 87

|     |   |      |     |      |
|-----|---|------|-----|------|
| 24  | 3 | 913  | 107 | 87   |
| 25  | 3 | 83   | 141 | 126  |
| 26  | 3 | 121  | 141 | 126  |
| 27  | 3 | 124  | 143 | 125  |
| 28  | 3 | 287  | 143 | 125  |
| 29  | 1 | 123  | 145 | 128  |
| 30  | 2 | 3950 | 146 | 155  |
| 31  | 3 | 122  | 147 | 127  |
| 32  | 3 | 953  | 147 | 127  |
| 33  | 2 | 164  | 161 | 1152 |
| 34  | 2 | 3982 | 162 | 1035 |
| 35  | 1 | 166  | 186 | 171  |
| 36  | 2 | 3954 | 187 | 198  |
| 37  | 3 | 169  | 188 | 170  |
| 38  | 3 | 333  | 188 | 170  |
| 39  | 3 | 168  | 190 | 173  |
| 40  | 3 | 206  | 190 | 173  |
| 41  | 3 | 167  | 192 | 172  |
| 42  | 3 | 4    | 192 | 172  |
| 43  | 3 | 168  | 226 | 211  |
| 44  | 3 | 206  | 226 | 211  |
| 45  | 3 | 209  | 228 | 210  |
| 46  | 3 | 373  | 228 | 210  |
| 47  | 3 | 208  | 230 | 213  |
| 48  | 3 | 246  | 230 | 213  |
| 49  | 3 | 207  | 232 | 212  |
| 50  | 3 | 44   | 232 | 212  |
| 51  | 3 | 208  | 266 | 251  |
| 52  | 3 | 246  | 266 | 251  |
| 53  | 3 | 249  | 268 | 250  |
| 54  | 3 | 413  | 268 | 250  |
| 55  | 3 | 248  | 270 | 253  |
| 56  | 3 | 286  | 270 | 253  |
| 57  | 3 | 247  | 272 | 252  |
| 58  | 3 | 84   | 272 | 252  |
| 59  | 3 | 248  | 306 | 291  |
| 60  | 3 | 286  | 306 | 291  |
| 61  | 3 | 289  | 308 | 290  |
| 62  | 3 | 453  | 308 | 290  |
| 63  | 1 | 288  | 310 | 293  |
| 64  | 2 | 3956 | 311 | 320  |
| 65  | 3 | 287  | 312 | 292  |
| 66  | 3 | 124  | 312 | 292  |
| 67  | 2 | 330  | 326 | 1317 |
| 68  | 2 | 328  | 327 | 1200 |
| 69  | 1 | 332  | 352 | 337  |
| 70  | 2 | 3960 | 353 | 364  |
| 71  | 3 | 335  | 354 | 336  |
| 72  | 3 | 499  | 354 | 336  |
| 73  | 3 | 334  | 356 | 339  |
| 74  | 3 | 372  | 356 | 339  |
| 75  | 3 | 333  | 358 | 338  |
| 76  | 3 | 169  | 358 | 338  |
| 77  | 3 | 334  | 392 | 377  |
| 78  | 3 | 372  | 392 | 377  |
| 79  | 3 | 375  | 394 | 376  |
| 80  | 3 | 539  | 394 | 376  |
| 81  | 3 | 374  | 396 | 379  |
| 82  | 3 | 412  | 396 | 379  |
| 83  | 3 | 373  | 398 | 378  |
| 84  | 3 | 209  | 398 | 378  |
| 85  | 3 | 374  | 432 | 417  |
| 86  | 3 | 412  | 432 | 417  |
| 87  | 3 | 415  | 434 | 416  |
| 88  | 3 | 579  | 434 | 416  |
| 89  | 3 | 414  | 436 | 419  |
| 90  | 3 | 452  | 436 | 419  |
| 91  | 3 | 413  | 438 | 418  |
| 92  | 3 | 249  | 438 | 418  |
| 93  | 3 | 414  | 472 | 457  |
| 94  | 3 | 452  | 472 | 457  |
| 95  | 3 | 455  | 474 | 456  |
| 96  | 3 | 619  | 474 | 456  |
| 97  | 1 | 454  | 476 | 459  |
| 98  | 2 | 3962 | 477 | 486  |
| 99  | 3 | 453  | 478 | 458  |
| 100 | 3 | 289  | 478 | 458  |
| 101 | 2 | 496  | 492 | 1483 |
| 102 | 2 | 494  | 493 | 1366 |
| 103 | 1 | 498  | 518 | 503  |
| 104 | 2 | 3966 | 519 | 530  |
| 105 | 3 | 501  | 520 | 502  |
| 106 | 3 | 665  | 520 | 502  |
| 107 | 3 | 500  | 522 | 505  |
| 108 | 3 | 538  | 522 | 505  |
| 109 | 3 | 499  | 524 | 504  |
| 110 | 3 | 335  | 524 | 504  |
| 111 | 3 | 500  | 558 | 543  |
| 112 | 3 | 538  | 558 | 543  |
| 113 | 3 | 541  | 560 | 542  |
| 114 | 3 | 705  | 560 | 542  |
| 115 | 3 | 540  | 562 | 545  |
| 116 | 3 | 578  | 562 | 545  |



|     |   |      |      |      |
|-----|---|------|------|------|
| 117 | 3 | 539  | 564  | 544  |
| 118 | 3 | 375  | 564  | 544  |
| 119 | 3 | 540  | 598  | 583  |
| 120 | 3 | 578  | 598  | 583  |
| 121 | 3 | 581  | 600  | 582  |
| 122 | 3 | 745  | 600  | 582  |
| 123 | 3 | 580  | 602  | 585  |
| 124 | 3 | 618  | 602  | 585  |
| 125 | 3 | 579  | 604  | 584  |
| 126 | 3 | 415  | 604  | 584  |
| 127 | 3 | 580  | 638  | 623  |
| 128 | 3 | 618  | 638  | 623  |
| 129 | 3 | 621  | 640  | 622  |
| 130 | 3 | 785  | 640  | 622  |
| 131 | 1 | 620  | 642  | 625  |
| 132 | 2 | 3968 | 643  | 652  |
| 133 | 3 | 619  | 644  | 624  |
| 134 | 3 | 455  | 644  | 624  |
| 135 | 2 | 662  | 658  | 1649 |
| 136 | 2 | 660  | 659  | 1532 |
| 137 | 1 | 664  | 684  | 669  |
| 138 | 2 | 3972 | 685  | 696  |
| 139 | 3 | 667  | 686  | 668  |
| 140 | 3 | 831  | 686  | 668  |
| 141 | 3 | 666  | 688  | 671  |
| 142 | 3 | 704  | 688  | 671  |
| 143 | 3 | 665  | 690  | 670  |
| 144 | 3 | 501  | 690  | 670  |
| 145 | 3 | 666  | 724  | 709  |
| 146 | 3 | 704  | 724  | 709  |
| 147 | 3 | 707  | 726  | 708  |
| 148 | 3 | 871  | 726  | 708  |
| 149 | 3 | 706  | 728  | 711  |
| 150 | 3 | 744  | 728  | 711  |
| 151 | 3 | 705  | 730  | 710  |
| 152 | 3 | 541  | 730  | 710  |
| 153 | 3 | 706  | 764  | 749  |
| 154 | 3 | 744  | 764  | 749  |
| 155 | 3 | 747  | 766  | 748  |
| 156 | 3 | 911  | 766  | 748  |
| 157 | 3 | 746  | 768  | 751  |
| 158 | 3 | 784  | 768  | 751  |
| 159 | 3 | 745  | 770  | 750  |
| 160 | 3 | 581  | 770  | 750  |
| 161 | 3 | 746  | 804  | 789  |
| 162 | 3 | 784  | 804  | 789  |
| 163 | 3 | 787  | 806  | 788  |
| 164 | 3 | 951  | 806  | 788  |
| 165 | 1 | 786  | 808  | 791  |
| 166 | 2 | 3974 | 809  | 818  |
| 167 | 3 | 785  | 810  | 790  |
| 168 | 3 | 621  | 810  | 790  |
| 169 | 2 | 828  | 824  | 1815 |
| 170 | 2 | 826  | 825  | 1698 |
| 171 | 1 | 830  | 850  | 835  |
| 172 | 2 | 3978 | 851  | 862  |
| 173 | 3 | 833  | 852  | 834  |
| 174 | 3 | 2    | 852  | 834  |
| 175 | 3 | 832  | 854  | 837  |
| 176 | 3 | 870  | 854  | 837  |
| 177 | 3 | 831  | 856  | 836  |
| 178 | 3 | 667  | 856  | 836  |
| 179 | 3 | 832  | 890  | 875  |
| 180 | 3 | 870  | 890  | 875  |
| 181 | 3 | 873  | 892  | 874  |
| 182 | 3 | 42   | 892  | 874  |
| 183 | 3 | 872  | 894  | 877  |
| 184 | 3 | 910  | 894  | 877  |
| 185 | 3 | 871  | 896  | 876  |
| 186 | 3 | 707  | 896  | 876  |
| 187 | 3 | 872  | 930  | 915  |
| 188 | 3 | 910  | 930  | 915  |
| 189 | 3 | 913  | 932  | 914  |
| 190 | 3 | 82   | 932  | 914  |
| 191 | 3 | 912  | 934  | 917  |
| 192 | 3 | 950  | 934  | 917  |
| 193 | 3 | 911  | 936  | 916  |
| 194 | 3 | 747  | 936  | 916  |
| 195 | 3 | 912  | 970  | 955  |
| 196 | 3 | 950  | 970  | 955  |
| 197 | 3 | 953  | 972  | 954  |
| 198 | 3 | 122  | 972  | 954  |
| 199 | 1 | 952  | 974  | 957  |
| 200 | 2 | 3980 | 975  | 984  |
| 201 | 3 | 951  | 976  | 956  |
| 202 | 3 | 787  | 976  | 956  |
| 203 | 2 | 994  | 990  | 1981 |
| 204 | 2 | 992  | 991  | 1864 |
| 205 | 1 | 996  | 1016 | 1001 |
| 206 | 2 | 163  | 1017 | 1028 |
| 207 | 3 | 999  | 1018 | 1000 |
| 208 | 3 | 1162 | 1018 | 1000 |
| 209 | 3 | 998  | 1020 | 1003 |

|     |   |      |      |      |
|-----|---|------|------|------|
| 210 | 3 | 1036 | 1020 | 1003 |
| 211 | 3 | 997  | 1022 | 1002 |
| 212 | 3 | 1828 | 1022 | 1002 |
| 213 | 3 | 998  | 1056 | 1041 |
| 214 | 3 | 1036 | 1056 | 1041 |
| 215 | 3 | 1039 | 1058 | 1040 |
| 216 | 3 | 1202 | 1058 | 1040 |
| 217 | 3 | 1038 | 1060 | 1043 |
| 218 | 3 | 1076 | 1060 | 1043 |
| 219 | 3 | 1037 | 1062 | 1042 |
| 220 | 3 | 1868 | 1062 | 1042 |
| 221 | 3 | 1038 | 1096 | 1081 |
| 222 | 3 | 1076 | 1096 | 1081 |
| 223 | 3 | 1079 | 1098 | 1080 |
| 224 | 3 | 1242 | 1098 | 1080 |
| 225 | 3 | 1078 | 1100 | 1083 |
| 226 | 3 | 1116 | 1100 | 1083 |
| 227 | 3 | 1077 | 1102 | 1082 |
| 228 | 3 | 1908 | 1102 | 1082 |
| 229 | 3 | 1078 | 1136 | 1121 |
| 230 | 3 | 1116 | 1136 | 1121 |
| 231 | 3 | 1119 | 1138 | 1120 |
| 232 | 3 | 1282 | 1138 | 1120 |
| 233 | 1 | 1118 | 1140 | 1123 |
| 234 | 2 | 165  | 1141 | 1150 |
| 235 | 3 | 1117 | 1142 | 1122 |
| 236 | 3 | 1948 | 1142 | 1122 |
| 237 | 2 | 1159 | 1156 | 2147 |
| 238 | 2 | 3983 | 1157 | 2030 |
| 239 | 1 | 1161 | 1181 | 1166 |
| 240 | 2 | 329  | 1182 | 1193 |
| 241 | 3 | 1164 | 1183 | 1165 |
| 242 | 3 | 1328 | 1183 | 1165 |
| 243 | 3 | 1163 | 1185 | 1168 |
| 244 | 3 | 1201 | 1185 | 1168 |
| 245 | 3 | 1162 | 1187 | 1167 |
| 246 | 3 | 999  | 1187 | 1167 |
| 247 | 3 | 1163 | 1221 | 1206 |
| 248 | 3 | 1201 | 1221 | 1206 |
| 249 | 3 | 1204 | 1223 | 1205 |
| 250 | 3 | 1368 | 1223 | 1205 |
| 251 | 3 | 1203 | 1225 | 1208 |
| 252 | 3 | 1241 | 1225 | 1208 |
| 253 | 3 | 1202 | 1227 | 1207 |
| 254 | 3 | 1039 | 1227 | 1207 |
| 255 | 3 | 1203 | 1261 | 1246 |
| 256 | 3 | 1241 | 1261 | 1246 |
| 257 | 3 | 1244 | 1263 | 1245 |
| 258 | 3 | 1408 | 1263 | 1245 |
| 259 | 3 | 1243 | 1265 | 1248 |
| 260 | 3 | 1281 | 1265 | 1248 |
| 261 | 3 | 1242 | 1267 | 1247 |
| 262 | 3 | 1079 | 1267 | 1247 |
| 263 | 3 | 1243 | 1301 | 1286 |
| 264 | 3 | 1281 | 1301 | 1286 |
| 265 | 3 | 1284 | 1303 | 1285 |
| 266 | 3 | 1448 | 1303 | 1285 |
| 267 | 1 | 1283 | 1305 | 1288 |
| 268 | 2 | 331  | 1306 | 1315 |
| 269 | 3 | 1282 | 1307 | 1287 |
| 270 | 3 | 1119 | 1307 | 1287 |
| 271 | 2 | 1325 | 1321 | 2312 |
| 272 | 2 | 1323 | 1322 | 2195 |
| 273 | 1 | 1327 | 1347 | 1332 |
| 274 | 2 | 495  | 1348 | 1359 |
| 275 | 3 | 1330 | 1349 | 1331 |
| 276 | 3 | 1494 | 1349 | 1331 |
| 277 | 3 | 1329 | 1351 | 1334 |
| 278 | 3 | 1367 | 1351 | 1334 |
| 279 | 3 | 1328 | 1353 | 1333 |
| 280 | 3 | 1164 | 1353 | 1333 |
| 281 | 3 | 1329 | 1387 | 1372 |
| 282 | 3 | 1367 | 1387 | 1372 |
| 283 | 3 | 1370 | 1389 | 1371 |
| 284 | 3 | 1534 | 1389 | 1371 |
| 285 | 3 | 1369 | 1391 | 1374 |
| 286 | 3 | 1407 | 1391 | 1374 |
| 287 | 3 | 1368 | 1393 | 1373 |
| 288 | 3 | 1204 | 1393 | 1373 |
| 289 | 3 | 1369 | 1427 | 1412 |
| 290 | 3 | 1407 | 1427 | 1412 |
| 291 | 3 | 1410 | 1429 | 1411 |
| 292 | 3 | 1574 | 1429 | 1411 |
| 293 | 3 | 1409 | 1431 | 1414 |
| 294 | 3 | 1447 | 1431 | 1414 |
| 295 | 3 | 1408 | 1433 | 1413 |
| 296 | 3 | 1244 | 1433 | 1413 |
| 297 | 3 | 1409 | 1467 | 1452 |
| 298 | 3 | 1447 | 1467 | 1452 |
| 299 | 3 | 1450 | 1469 | 1451 |
| 300 | 3 | 1614 | 1469 | 1451 |
| 301 | 1 | 1449 | 1471 | 1454 |
| 302 | 2 | 497  | 1472 | 1481 |

303 3 1448 1473 1453  
304 3 1284 1473 1453  
305 2 1491 1487 2478  
306 2 1489 1488 2361  
307 1 1493 1513 1498  
308 2 661 1514 1525  
309 3 1496 1515 1497  
310 3 1660 1515 1497  
311 3 1495 1517 1500  
312 3 1533 1517 1500  
313 3 1494 1519 1499  
314 3 1330 1519 1499  
315 3 1495 1553 1538  
316 3 1533 1553 1538  
317 3 1536 1555 1537  
318 3 1700 1555 1537  
319 3 1535 1557 1540  
320 3 1573 1557 1540  
321 3 1534 1559 1539  
322 3 1370 1559 1539  
323 3 1535 1593 1578  
324 3 1573 1593 1578  
325 3 1576 1595 1577  
326 3 1740 1595 1577  
327 3 1575 1597 1580  
328 3 1613 1597 1580  
329 3 1574 1599 1579  
330 3 1410 1599 1579  
331 3 1575 1633 1618  
332 3 1613 1633 1618  
333 3 1616 1635 1617  
334 3 1780 1635 1617  
335 1 1615 1637 1620  
336 2 663 1638 1647  
337 3 1614 1639 1619  
338 3 1450 1639 1619  
339 2 1657 1653 2644  
340 2 1655 1654 2527  
341 1 1659 1679 1664  
342 2 827 1680 1691  
343 3 1662 1681 1663  
344 3 1826 1681 1663  
345 3 1661 1683 1666  
346 3 1699 1683 1666  
347 3 1660 1685 1665  
348 3 1496 1685 1665  
349 3 1661 1719 1704  
350 3 1699 1719 1704  
351 3 1702 1721 1703  
352 3 1866 1721 1703  
353 3 1701 1723 1706  
354 3 1739 1723 1706  
355 3 1700 1725 1705  
356 3 1536 1725 1705  
357 3 1701 1759 1744  
358 3 1739 1759 1744  
359 3 1742 1761 1743  
360 3 1906 1761 1743  
361 3 1741 1763 1746  
362 3 1779 1763 1746  
363 3 1740 1765 1745  
364 3 1576 1765 1745  
365 3 1741 1799 1784  
366 3 1779 1799 1784  
367 3 1782 1801 1783  
368 3 1946 1801 1783  
369 1 1781 1803 1786  
370 2 829 1804 1813  
371 3 1780 1805 1785  
372 3 1616 1805 1785  
373 2 1823 1819 2810  
374 2 1821 1820 2693  
375 1 1825 1845 1830  
376 2 993 1846 1857  
377 3 1828 1847 1829  
378 3 997 1847 1829  
379 3 1827 1849 1832  
380 3 1865 1849 1832  
381 3 1826 1851 1831  
382 3 1662 1851 1831  
383 3 1827 1885 1870  
384 3 1865 1885 1870  
385 3 1868 1887 1869  
386 3 1037 1887 1869  
387 3 1867 1889 1872  
388 3 1905 1889 1872  
389 3 1866 1891 1871  
390 3 1702 1891 1871  
391 3 1867 1925 1910  
392 3 1905 1925 1910  
393 3 1908 1927 1909  
394 3 1077 1927 1909  
395 3 1907 1929 1912

396 3 1945 1929 1912  
397 3 1906 1931 1911  
398 3 1742 1931 1911  
399 3 1907 1965 1950  
400 3 1945 1965 1950  
401 3 1948 1967 1949  
402 3 1117 1967 1949  
403 1 1947 1969 1952  
404 2 995 1970 1979  
405 3 1946 1971 1951  
406 3 1782 1971 1951  
407 2 1989 1985 2976  
408 2 1987 1986 2859  
409 1 1991 2011 1996  
410 2 1158 2012 2023  
411 3 1994 2013 1995  
412 3 2157 2013 1995  
413 3 1993 2015 1998  
414 3 2031 2015 1998  
415 3 1992 2017 1997  
416 3 2823 2017 1997  
417 3 1993 2051 2036  
418 3 2031 2051 2036  
419 3 2034 2053 2035  
420 3 2197 2053 2035  
421 3 2033 2055 2038  
422 3 2071 2055 2038  
423 3 2032 2057 2037  
424 3 2863 2057 2037  
425 3 2033 2091 2076  
426 3 2071 2091 2076  
427 3 2074 2093 2075  
428 3 2237 2093 2075  
429 3 2073 2095 2078  
430 3 2111 2095 2078  
431 3 2072 2097 2077  
432 3 2903 2097 2077  
433 3 2073 2131 2116  
434 3 2111 2131 2116  
435 3 2114 2133 2115  
436 3 2277 2133 2115  
437 1 2113 2135 2118  
438 2 1160 2136 2145  
439 3 2112 2137 2117  
440 3 2943 2137 2117  
441 2 2154 2151 3142  
442 2 3984 2152 3025  
443 1 2156 2176 2161  
444 2 1324 2177 2188  
445 3 2159 2178 2160  
446 3 2323 2178 2160  
447 3 2158 2180 2163  
448 3 2196 2180 2163  
449 3 2157 2182 2162  
450 3 1994 2182 2162  
451 3 2158 2216 2201  
452 3 2196 2216 2201  
453 3 2199 2218 2200  
454 3 2363 2218 2200  
455 3 2198 2220 2203  
456 3 2236 2220 2203  
457 3 2197 2222 2202  
458 3 2034 2222 2202  
459 3 2198 2256 2241  
460 3 2236 2256 2241  
461 3 2239 2258 2240  
462 3 2403 2258 2240  
463 3 2238 2260 2243  
464 3 2276 2260 2243  
465 3 2237 2262 2242  
466 3 2074 2262 2242  
467 3 2238 2296 2281  
468 3 2276 2296 2281  
469 3 2279 2298 2280  
470 3 2443 2298 2280  
471 1 2278 2300 2283  
472 2 1326 2301 2310  
473 3 2277 2302 2282  
474 3 2114 2302 2282  
475 2 2320 2316 3302  
476 2 2318 2317 3185  
477 1 2322 2342 2327  
478 2 1490 2343 2354  
479 3 2325 2344 2326  
480 3 2489 2344 2326  
481 3 2324 2346 2329  
482 3 2362 2346 2329  
483 3 2323 2348 2328  
484 3 2159 2348 2328  
485 3 2324 2382 2367  
486 3 2362 2382 2367  
487 3 2365 2384 2366  
488 3 2529 2384 2366

489 3 2364 2386 2369  
490 3 2402 2386 2369  
491 3 2363 2388 2368  
492 3 2199 2388 2368  
493 3 2364 2422 2407  
494 3 2402 2422 2407  
495 3 2405 2424 2406  
496 3 2569 2424 2406  
497 3 2404 2426 2409  
498 3 2442 2426 2409  
499 3 2403 2428 2408  
500 3 2239 2428 2408  
501 3 2404 2462 2447  
502 3 2442 2462 2447  
503 3 2445 2464 2446  
504 3 2609 2464 2446  
505 1 2444 2466 2449  
506 2 1492 2467 2476  
507 3 2443 2468 2448  
508 3 2279 2468 2448  
509 2 2486 2482 3462  
510 2 2484 2483 3345  
511 1 2488 2508 2493  
512 2 1656 2509 2520  
513 3 2491 2510 2492  
514 3 2655 2510 2492  
515 3 2490 2512 2495  
516 3 2528 2512 2495  
517 3 2489 2514 2494  
518 3 2325 2514 2494  
519 3 2490 2548 2533  
520 3 2528 2548 2533  
521 3 2531 2550 2532  
522 3 2695 2550 2532  
523 3 2530 2552 2535  
524 3 2568 2552 2535  
525 3 2529 2554 2534  
526 3 2365 2554 2534  
527 3 2530 2588 2573  
528 3 2568 2588 2573  
529 3 2571 2590 2572  
530 3 2735 2590 2572  
531 3 2570 2592 2575  
532 3 2608 2592 2575  
533 3 2569 2594 2574  
534 3 2405 2594 2574  
535 3 2570 2628 2613  
536 3 2608 2628 2613  
537 3 2611 2630 2612  
538 3 2775 2630 2612  
539 1 2610 2632 2615  
540 2 1658 2633 2642  
541 3 2609 2634 2614  
542 3 2445 2634 2614  
543 2 2652 2648 3622  
544 2 2650 2649 3505  
545 1 2654 2674 2659  
546 2 1822 2675 2686  
547 3 2657 2676 2658  
548 3 2821 2676 2658  
549 3 2656 2678 2661  
550 3 2694 2678 2661  
551 3 2655 2680 2660  
552 3 2491 2680 2660  
553 3 2656 2714 2699  
554 3 2694 2714 2699  
555 3 2697 2716 2698  
556 3 2861 2716 2698  
557 3 2696 2718 2701  
558 3 2734 2718 2701  
559 3 2695 2720 2700  
560 3 2531 2720 2700  
561 3 2696 2754 2739  
562 3 2734 2754 2739  
563 3 2737 2756 2738  
564 3 2901 2756 2738  
565 3 2736 2758 2741  
566 3 2774 2758 2741  
567 3 2735 2760 2740  
568 3 2571 2760 2740  
569 3 2736 2794 2779  
570 3 2774 2794 2779  
571 3 2777 2796 2778  
572 3 2941 2796 2778  
573 1 2776 2798 2781  
574 2 1824 2799 2808  
575 3 2775 2800 2780  
576 3 2611 2800 2780  
577 2 2818 2814 3782  
578 2 2816 2815 3665  
579 1 2820 2840 2825  
580 2 1988 2841 2852  
581 3 2823 2842 2824

582 3 1992 2842 2824  
583 3 2822 2844 2827  
584 3 2860 2844 2827  
585 3 2821 2846 2826  
586 3 2657 2846 2826  
587 3 2822 2880 2865  
588 3 2860 2880 2865  
589 3 2863 2882 2864  
590 3 2032 2882 2864  
591 3 2862 2884 2867  
592 3 2900 2884 2867  
593 3 2861 2886 2866  
594 3 2697 2886 2866  
595 3 2862 2920 2905  
596 3 2900 2920 2905  
597 3 2903 2922 2904  
598 3 2072 2922 2904  
599 3 2902 2924 2907  
600 3 2940 2924 2907  
601 3 2901 2926 2906  
602 3 2737 2926 2906  
603 3 2902 2960 2945  
604 3 2940 2960 2945  
605 3 2943 2962 2944  
606 3 2112 2962 2944  
607 1 2942 2964 2947  
608 2 1990 2965 2974  
609 3 2941 2966 2946  
610 3 2777 2966 2946  
611 2 2984 2980 3942  
612 2 2982 2981 3825  
613 1 2986 3006 2991  
614 2 2153 3007 3018  
615 3 2989 3008 2990  
616 3 3147 3008 2990  
617 3 2988 3010 2993  
618 3 3026 3010 2993  
619 3 2987 3012 2992  
620 3 3789 3012 2992  
621 3 2988 3046 3031  
622 3 3026 3046 3031  
623 3 3029 3048 3030  
624 3 3187 3048 3030  
625 3 3028 3050 3033  
626 3 3066 3050 3033  
627 3 3027 3052 3032  
628 3 3829 3052 3032  
629 3 3028 3086 3071  
630 3 3066 3086 3071  
631 3 3069 3088 3070  
632 3 3227 3088 3070  
633 3 3068 3090 3073  
634 3 3106 3090 3073  
635 3 3067 3092 3072  
636 3 3869 3092 3072  
637 3 3068 3126 3111  
638 3 3106 3126 3111  
639 3 3109 3128 3110  
640 3 3267 3128 3110  
641 1 3108 3130 3113  
642 2 2155 3131 3140  
643 3 3107 3132 3112  
644 3 3909 3132 3112  
645 1 3146 3166 3151  
646 2 2319 3167 3178  
647 3 3149 3168 3150  
648 3 3307 3168 3150  
649 3 3148 3170 3153  
650 3 3186 3170 3153  
651 3 3147 3172 3152  
652 3 2989 3172 3152  
653 3 3148 3206 3191  
654 3 3186 3206 3191  
655 3 3189 3208 3190  
656 3 3347 3208 3190  
657 3 3188 3210 3193  
658 3 3226 3210 3193  
659 3 3187 3212 3192  
660 3 3029 3212 3192  
661 3 3188 3246 3231  
662 3 3226 3246 3231  
663 3 3229 3248 3230  
664 3 3387 3248 3230  
665 3 3228 3250 3233  
666 3 3266 3250 3233  
667 3 3227 3252 3232  
668 3 3069 3252 3232  
669 3 3228 3286 3271  
670 3 3266 3286 3271  
671 3 3269 3288 3270  
672 3 3427 3288 3270  
673 1 3268 3290 3273  
674 2 2321 3291 3300

675 3 3267 3292 3272  
676 3 3109 3292 3272  
677 1 3306 3326 3311  
678 2 2485 3327 3338  
679 3 3309 3328 3310  
680 3 3467 3328 3310  
681 3 3308 3330 3313  
682 3 3346 3330 3313  
683 3 3307 3332 3312  
684 3 3149 3332 3312  
685 3 3308 3366 3351  
686 3 3346 3366 3351  
687 3 3349 3368 3350  
688 3 3507 3368 3350  
689 3 3348 3370 3353  
690 3 3386 3370 3353  
691 3 3347 3372 3352  
692 3 3189 3372 3352  
693 3 3348 3406 3391  
694 3 3386 3406 3391  
695 3 3389 3408 3390  
696 3 3547 3408 3390  
697 3 3388 3410 3393  
698 3 3426 3410 3393  
699 3 3387 3412 3392  
700 3 3229 3412 3392  
701 3 3388 3446 3431  
702 3 3426 3446 3431  
703 3 3429 3448 3430  
704 3 3587 3448 3430  
705 1 3428 3450 3433  
706 2 2487 3451 3460  
707 3 3427 3452 3432  
708 3 3269 3452 3432  
709 1 3466 3486 3471  
710 2 2651 3487 3498  
711 3 3469 3488 3470  
712 3 3627 3488 3470  
713 3 3468 3490 3473  
714 3 3506 3490 3473  
715 3 3467 3492 3472  
716 3 3309 3492 3472  
717 3 3468 3526 3511  
718 3 3506 3526 3511  
719 3 3509 3528 3510  
720 3 3667 3528 3510  
721 3 3508 3530 3513  
722 3 3546 3530 3513  
723 3 3507 3532 3512  
724 3 3349 3532 3512  
725 3 3508 3566 3551  
726 3 3546 3566 3551  
727 3 3549 3568 3550  
728 3 3707 3568 3550  
729 3 3548 3570 3553  
730 3 3586 3570 3553  
731 3 3547 3572 3552  
732 3 3389 3572 3552  
733 3 3548 3606 3591  
734 3 3586 3606 3591  
735 3 3589 3608 3590  
736 3 3747 3608 3590  
737 1 3588 3610 3593  
738 2 2653 3611 3620  
739 3 3587 3612 3592  
740 3 3429 3612 3592  
741 1 3626 3646 3631  
742 2 2817 3647 3658  
743 3 3629 3648 3630  
744 3 3787 3648 3630  
745 3 3628 3650 3633  
746 3 3666 3650 3633  
747 3 3627 3652 3632  
748 3 3469 3652 3632  
749 3 3628 3686 3671  
750 3 3666 3686 3671  
751 3 3669 3688 3670  
752 3 3827 3688 3670  
753 3 3668 3690 3673  
754 3 3706 3690 3673  
755 3 3667 3692 3672  
756 3 3509 3692 3672  
757 3 3668 3726 3711  
758 3 3706 3726 3711  
759 3 3709 3728 3710  
760 3 3867 3728 3710  
761 3 3708 3730 3713  
762 3 3746 3730 3713  
763 3 3707 3732 3712  
764 3 3549 3732 3712  
765 3 3708 3766 3751  
766 3 3746 3766 3751  
767 3 3749 3768 3750

```

768 3 3907 3768 3750
769 1 3748 3770 3753
770 2 2819 3771 3780
771 3 3747 3772 3752
772 3 3589 3772 3752
773 1 3786 3806 3791
774 2 2983 3807 3818
775 3 3789 3808 3790
776 3 2987 3808 3790
777 3 3788 3810 3793
778 3 3826 3810 3793
779 3 3787 3812 3792
780 3 3629 3812 3792
781 3 3788 3846 3831
782 3 3826 3846 3831
783 3 3829 3848 3830
784 3 3027 3848 3830
785 3 3828 3850 3833
786 3 3866 3850 3833
787 3 3827 3852 3832
788 3 3669 3852 3832
789 3 3828 3886 3871
790 3 3866 3886 3871
791 3 3869 3888 3870
792 3 3067 3888 3870
793 3 3868 3890 3873
794 3 3906 3890 3873
795 3 3867 3892 3872
796 3 3709 3892 3872
797 3 3868 3926 3911
798 3 3906 3926 3911
799 3 3909 3928 3910
800 3 3107 3928 3910
801 1 3908 3930 3913
802 2 2985 3931 3940
803 3 3907 3932 3912
804 3 3749 3932 3912
805 2 3949 3946 157
806 2 3981 3947 40
807 2 3955 3951 322
808 2 3953 3952 205
809 2 3961 3957 488
810 2 3959 3958 371
811 2 3967 3963 654
812 2 3965 3964 537
813 2 3973 3969 820
814 2 3971 3970 703
815 2 3979 3975 986
816 2 3977 3976 869

```

## LAMMPS Input Script:

```

units      real
atom_style full
boundary   p p p
pair_style lj/cut/coul/long 10
pair_modify mix arithmetic
angle_style harmonic
bond_style morse

read_data 010-6x4x4Clean.data

kspace_style ewald 0.0001
special_bonds lj 0.0 0.0 0.5
special_bonds coul 0.0 0.0 0.8333

thermo_style custom step etotal ke pe ebond eangle edihed evdwl ecoul elong temp press vol lx ly lz
thermo_modify lost error
thermo      100

timestep   1.0
run_style  respa 2 2 pair 1 kspace 2

velocity all create 298 1103 dist gaussian

fix 1 all nve
fix 2 all temp/rescale 1 298.0 298.0 5 1.0

restart 10000 restart.1 restart.2

run 1000000

unfix 2

run 1000000

timestep .001

unfix 1
fix 3 all nve

```



```

fix 4 all press/berendsen x 10000 1.0 1000.0 z 10000 1.0 1000.0
fix 5 all temp/rescale 1 298.0 298.0 5 1.0

run 1000000

unfix 4
unfix 5
fix 6 all press/berendsen x 1.0 1.0 10000.0 z 1.0 1.0 10000.0
fix 7 all temp/berendsen 298.0 298.0 100.0
timestep .01

run 1000000

timestep .1
unfix 6
unfix 7
fix 8 all press/berendsen x 1.0 1.0 100000.0 z 1.0 1.0 100000.0
fix 9 all temp/berendsen 298.0 298.0 100.0

run 1000000

timestep 1.0

unfix 8
unfix 9
fix 10 all press/berendsen x 1.0 1.0 1000000.0 z 1.0 1.0 1000000.0
fix 11 all temp/berendsen 298.0 298.0 100.0

run 10000000

unfix 10
unfix 11

run 10000000

dump 1 all custom 2 dump.velo type id x y z vx vy vz
dump_modify 1 sort 2

run 5000000

```

## 010 Pyrophyllite Face Deuterated

### LAMMPS Data File:

LAMMPS data file. clayff2lmp v1.0.0 / 03 Oct 2017 / CGMM for 010-6x4x4-dClean

```

3984 atoms
480 bonds
816 angles
  0 dihedrals
  0 impropers

8 atom types
3 bond types types
3 angle types types

-15.530100000 15.530100000 xlo xhi
-27.818200000 27.818200000 ylo yhi
-18.665000000 18.665000000 zlo zhi

Masses

 1 26.981540 # ao
 2 1.007970 # ho
 3 2.015940 # do
 4 15.999400 # ob
 5 15.999400 # oho
 6 15.999400 # oht
 7 15.999400 # oh
 8 28.085500 # st

Pair Coeffs # lj/cut/coul/long

 1 0.0000013297 4.2713219316 # ao
 2 0.0000000000 0.0000000000 # ho
 3 0.0000000000 0.0000000000 # do
 4 0.1554164124 3.1655200879 # ob
 5 0.1554164124 3.1655200879 # oho
 6 0.1554164124 3.1655200879 # oht
 7 0.1554164124 3.1655200879 # oh
 8 0.0000018402 3.3019566252 # st

Bond Coeffs # harmonic

 1 132.2491 2.1815 0.945 # ho-oh
 2 132.2491 2.1815 0.945 # do-oho
 3 132.2491 2.1815 0.945 # do-oht

```

Angle Coeffs # harmonic

1 15.0000 110.0000 # ao-oho-do  
 2 15.0000 100.0000 # do-oh-st  
 3 15.0000 110.0000 # ao-oh-ho

Atoms # full

|    |   |   |           |             |              |              |   |   |   |       |
|----|---|---|-----------|-------------|--------------|--------------|---|---|---|-------|
| 1  | 1 | 1 | 1.575000  | 2.588555029 | 1.474661568  | 9.332770632  | 0 | 0 | 0 | # ao  |
| 2  | 1 | 1 | 1.575000  | 0.000205029 | 5.929211568  | 9.332770632  | 0 | 0 | 0 | # ao  |
| 3  | 1 | 1 | 1.575000  | 2.588144971 | 7.434438432  | 9.332229368  | 0 | 0 | 0 | # ao  |
| 4  | 1 | 1 | 1.575000  | 5.176494971 | 2.979888432  | 9.332229368  | 0 | 0 | 0 | # ao  |
| 5  | 1 | 2 | 0.425000  | 3.734650872 | 4.457267322  | 10.818615063 | 0 | 0 | 0 | # ho  |
| 6  | 1 | 3 | 0.425000  | 1.146300872 | 0.002717322  | 10.818615063 | 0 | 0 | 0 | # do  |
| 7  | 1 | 2 | 0.425000  | 1.442049128 | 4.451832678  | 7.846384937  | 0 | 0 | 0 | # ho  |
| 8  | 1 | 2 | 0.425000  | 4.030399128 | 8.906382678  | 7.846384937  | 0 | 0 | 0 | # ho  |
| 9  | 1 | 4 | -1.050000 | 0.981314655 | 1.677501481  | 8.299077932  | 0 | 0 | 0 | # ob  |
| 10 | 1 | 4 | -1.050000 | 5.023517264 | 6.305096126  | 6.100653738  | 0 | 0 | 0 | # ob  |
| 11 | 1 | 4 | -1.050000 | 3.570244487 | 2.773649320  | 8.298868622  | 0 | 0 | 0 | # ob  |
| 12 | 1 | 4 | -1.050000 | 2.434839092 | 7.048710300  | 6.099420289  | 0 | 0 | 0 | # ob  |
| 13 | 1 | 4 | -1.050000 | 0.981894487 | 7.228199320  | 8.298868622  | 0 | 0 | 0 | # ob  |
| 14 | 1 | 4 | -1.050000 | 1.606455513 | 6.135450680  | 10.366131378 | 0 | 0 | 0 | # ob  |
| 15 | 1 | 4 | -1.050000 | 5.023189092 | 2.594160300  | 6.099420289  | 0 | 0 | 0 | # ob  |
| 16 | 1 | 4 | -1.050000 | 1.607035345 | 2.777048519  | 10.365922068 | 0 | 0 | 0 | # ob  |
| 17 | 1 | 4 | -1.050000 | 2.741532736 | 7.058553874  | 12.564346262 | 0 | 0 | 0 | # ob  |
| 18 | 1 | 4 | -1.050000 | 4.195385345 | 7.231598519  | 10.365922068 | 0 | 0 | 0 | # ob  |
| 19 | 1 | 4 | -1.050000 | 0.153182736 | 2.604003874  | 12.564346262 | 0 | 0 | 0 | # ob  |
| 20 | 1 | 4 | -1.050000 | 2.741860908 | 1.860389700  | 12.565579711 | 0 | 0 | 0 | # ob  |
| 21 | 1 | 5 | -0.950000 | 1.999257657 | 0.000940996  | 10.345082885 | 0 | 0 | 0 | # oho |
| 22 | 1 | 6 | -0.950000 | 4.667081651 | 0.003976970  | 12.393982417 | 0 | 0 | 0 | # oht |
| 23 | 1 | 7 | -0.950000 | 4.587607657 | 4.455490996  | 10.345082885 | 0 | 0 | 0 | # oh  |
| 24 | 1 | 4 | -1.050000 | 2.078731651 | 4.458526970  | 12.393982417 | 0 | 0 | 0 | # ob  |
| 25 | 1 | 7 | -0.950000 | 3.177442343 | 8.908159004  | 8.319917115  | 0 | 0 | 0 | # oh  |
| 26 | 1 | 4 | -1.050000 | 0.509618349 | 8.905123030  | 6.271017583  | 0 | 0 | 0 | # ob  |
| 27 | 1 | 7 | -0.950000 | 0.589092343 | 4.453609004  | 8.319917115  | 0 | 0 | 0 | # oh  |
| 28 | 1 | 4 | -1.050000 | 3.097968349 | 4.450573030  | 6.271017583  | 0 | 0 | 0 | # ob  |
| 29 | 1 | 4 | -1.050000 | 4.194805513 | 1.680900680  | 10.366131378 | 0 | 0 | 0 | # ob  |
| 30 | 1 | 4 | -1.050000 | 0.153510908 | 6.314939700  | 12.565579711 | 0 | 0 | 0 | # ob  |
| 31 | 1 | 4 | -1.050000 | 3.569664655 | 6.132051481  | 8.299077932  | 0 | 0 | 0 | # ob  |
| 32 | 1 | 4 | -1.050000 | 2.435167264 | 1.850546126  | 6.100653738  | 0 | 0 | 0 | # ob  |
| 33 | 1 | 8 | 2.100000  | 4.222997014 | 1.527119204  | 11.995277170 | 0 | 0 | 0 | # st  |
| 34 | 1 | 8 | 2.100000  | 3.542027774 | 5.973370782  | 6.670701903  | 0 | 0 | 0 | # st  |
| 35 | 1 | 8 | 2.100000  | 0.953702986 | 7.381980796  | 6.669722830  | 0 | 0 | 0 | # st  |
| 36 | 1 | 8 | 2.100000  | 3.542052986 | 2.927430796  | 6.669722830  | 0 | 0 | 0 | # st  |
| 37 | 1 | 8 | 2.100000  | 4.223022226 | 7.390279218  | 11.994298097 | 0 | 0 | 0 | # st  |
| 38 | 1 | 8 | 2.100000  | 1.634672226 | 2.935729218  | 11.994298097 | 0 | 0 | 0 | # st  |
| 39 | 1 | 8 | 2.100000  | 1.634647014 | 5.981669204  | 11.995277170 | 0 | 0 | 0 | # st  |
| 40 | 1 | 8 | 2.100000  | 0.953677774 | 1.518820782  | 6.670701903  | 0 | 0 | 0 | # st  |
| 41 | 1 | 1 | 1.575000  | 2.588555029 | 10.383761568 | 9.332770632  | 0 | 0 | 0 | # ao  |
| 42 | 1 | 1 | 1.575000  | 0.000205029 | 14.838311568 | 9.332770632  | 0 | 0 | 0 | # ao  |
| 43 | 1 | 1 | 1.575000  | 2.588144971 | 16.343538432 | 9.332229368  | 0 | 0 | 0 | # ao  |
| 44 | 1 | 1 | 1.575000  | 5.176494971 | 11.889888432 | 9.332229368  | 0 | 0 | 0 | # ao  |
| 45 | 1 | 2 | 0.425000  | 3.734650872 | 13.366367322 | 10.818615063 | 0 | 0 | 0 | # ho  |
| 46 | 1 | 2 | 0.425000  | 1.146300872 | 8.911817322  | 10.818615063 | 0 | 0 | 0 | # ho  |
| 47 | 1 | 2 | 0.425000  | 1.442049128 | 13.360932678 | 7.846384937  | 0 | 0 | 0 | # ho  |
| 48 | 1 | 2 | 0.425000  | 4.030399128 | 17.815482678 | 7.846384937  | 0 | 0 | 0 | # ho  |
| 49 | 1 | 4 | -1.050000 | 0.981314655 | 10.586601481 | 8.299077932  | 0 | 0 | 0 | # ob  |
| 50 | 1 | 4 | -1.050000 | 5.023517264 | 15.214196126 | 6.100653738  | 0 | 0 | 0 | # ob  |
| 51 | 1 | 4 | -1.050000 | 3.570244487 | 11.682749320 | 8.298868622  | 0 | 0 | 0 | # ob  |
| 52 | 1 | 4 | -1.050000 | 2.434839092 | 15.957810300 | 6.099420289  | 0 | 0 | 0 | # ob  |
| 53 | 1 | 4 | -1.050000 | 0.981894487 | 16.137299320 | 8.298868622  | 0 | 0 | 0 | # ob  |
| 54 | 1 | 4 | -1.050000 | 1.606455513 | 15.044550680 | 10.366131378 | 0 | 0 | 0 | # ob  |
| 55 | 1 | 4 | -1.050000 | 5.023189092 | 11.503260300 | 6.099420289  | 0 | 0 | 0 | # ob  |
| 56 | 1 | 4 | -1.050000 | 1.607035345 | 11.686148519 | 10.365922068 | 0 | 0 | 0 | # ob  |
| 57 | 1 | 4 | -1.050000 | 2.741532736 | 15.967653874 | 12.564346262 | 0 | 0 | 0 | # ob  |
| 58 | 1 | 4 | -1.050000 | 4.195385345 | 16.140698519 | 10.365922068 | 0 | 0 | 0 | # ob  |
| 59 | 1 | 4 | -1.050000 | 0.153182736 | 11.513103874 | 12.564346262 | 0 | 0 | 0 | # ob  |
| 60 | 1 | 4 | -1.050000 | 2.741860908 | 10.769489700 | 12.565579711 | 0 | 0 | 0 | # ob  |
| 61 | 1 | 7 | -0.950000 | 1.999257657 | 8.910040996  | 10.345082885 | 0 | 0 | 0 | # oh  |
| 62 | 1 | 4 | -1.050000 | 4.667081651 | 8.913076970  | 12.393982417 | 0 | 0 | 0 | # ob  |
| 63 | 1 | 7 | -0.950000 | 4.587607657 | 13.364590996 | 10.345082885 | 0 | 0 | 0 | # oh  |
| 64 | 1 | 4 | -1.050000 | 2.078731651 | 13.367626970 | 12.393982417 | 0 | 0 | 0 | # ob  |
| 65 | 1 | 7 | -0.950000 | 3.177442343 | 17.817259004 | 8.319917115  | 0 | 0 | 0 | # oh  |
| 66 | 1 | 4 | -1.050000 | 0.509618349 | 17.814223030 | 6.271017583  | 0 | 0 | 0 | # ob  |
| 67 | 1 | 7 | -0.950000 | 0.589092343 | 13.362709004 | 8.319917115  | 0 | 0 | 0 | # oh  |
| 68 | 1 | 4 | -1.050000 | 3.097968349 | 13.359673030 | 6.271017583  | 0 | 0 | 0 | # ob  |
| 69 | 1 | 4 | -1.050000 | 4.194805513 | 10.590000680 | 10.366131378 | 0 | 0 | 0 | # ob  |
| 70 | 1 | 4 | -1.050000 | 0.153510908 | 15.224039700 | 12.565579711 | 0 | 0 | 0 | # ob  |
| 71 | 1 | 4 | -1.050000 | 3.569664655 | 15.041151481 | 8.299077932  | 0 | 0 | 0 | # ob  |
| 72 | 1 | 4 | -1.050000 | 2.435167264 | 10.759646126 | 6.100653738  | 0 | 0 | 0 | # ob  |
| 73 | 1 | 8 | 2.100000  | 4.222997014 | 10.436219204 | 11.995277170 | 0 | 0 | 0 | # st  |
| 74 | 1 | 8 | 2.100000  | 3.542027774 | 14.882470782 | 6.670701903  | 0 | 0 | 0 | # st  |
| 75 | 1 | 8 | 2.100000  | 0.953702986 | 16.291080796 | 6.669722830  | 0 | 0 | 0 | # st  |
| 76 | 1 | 8 | 2.100000  | 3.542052986 | 11.836530796 | 6.669722830  | 0 | 0 | 0 | # st  |
| 77 | 1 | 8 | 2.100000  | 4.223022226 | 16.299379218 | 11.994298097 | 0 | 0 | 0 | # st  |
| 78 | 1 | 8 | 2.100000  | 1.634672226 | 11.844829218 | 11.994298097 | 0 | 0 | 0 | # st  |
| 79 | 1 | 8 | 2.100000  | 1.634647014 | 14.890769204 | 11.995277170 | 0 | 0 | 0 | # st  |
| 80 | 1 | 8 | 2.100000  | 0.953677774 | 10.427920782 | 6.670701903  | 0 | 0 | 0 | # st  |
| 81 | 1 | 1 | 1.575000  | 2.588555029 | 19.292861568 | 9.332770632  | 0 | 0 | 0 | # ao  |
| 82 | 1 | 1 | 1.575000  | 0.000205029 | 23.747411568 | 9.332770632  | 0 | 0 | 0 | # ao  |
| 83 | 1 | 1 | 1.575000  | 2.588144971 | 25.252638432 | 9.332229368  | 0 | 0 | 0 | # ao  |
| 84 | 1 | 1 | 1.575000  | 5.176494971 | 20.798088432 | 9.332229368  | 0 | 0 | 0 | # ao  |
| 85 | 1 | 2 | 0.425000  | 3.734650872 | 22.275467322 | 10.818615063 | 0 | 0 | 0 | # ho  |

|     |   |   |           |              |               |               |   |   |   |   |     |
|-----|---|---|-----------|--------------|---------------|---------------|---|---|---|---|-----|
| 86  | 1 | 2 | 0.425000  | 1.146300872  | 17.820917322  | 10.818615063  | 0 | 0 | 0 | # | ho  |
| 87  | 1 | 2 | 0.425000  | 1.442049128  | 22.270032678  | 7.846384937   | 0 | 0 | 0 | # | ho  |
| 88  | 1 | 2 | 0.425000  | 4.030399128  | 26.724582678  | 7.846384937   | 0 | 0 | 0 | # | ho  |
| 89  | 1 | 4 | -1.050000 | 0.981314655  | 19.495701481  | 8.299077932   | 0 | 0 | 0 | # | ob  |
| 90  | 1 | 4 | -1.050000 | 5.023517264  | 24.123296126  | 6.100653738   | 0 | 0 | 0 | # | ob  |
| 91  | 1 | 4 | -1.050000 | 3.570244487  | 20.591849320  | 8.298868622   | 0 | 0 | 0 | # | ob  |
| 92  | 1 | 4 | -1.050000 | 2.434839092  | 24.866910300  | 6.099420289   | 0 | 0 | 0 | # | ob  |
| 93  | 1 | 4 | -1.050000 | 0.981894487  | 25.046399320  | 8.298868622   | 0 | 0 | 0 | # | ob  |
| 94  | 1 | 4 | -1.050000 | 1.606455513  | 23.953650680  | 10.366131378  | 0 | 0 | 0 | # | ob  |
| 95  | 1 | 4 | -1.050000 | 5.023189092  | 20.412360300  | 6.099420289   | 0 | 0 | 0 | # | ob  |
| 96  | 1 | 4 | -1.050000 | 1.607035345  | 20.595248519  | 10.365922068  | 0 | 0 | 0 | # | ob  |
| 97  | 1 | 4 | -1.050000 | 2.741532736  | 24.876753874  | 12.564346262  | 0 | 0 | 0 | # | ob  |
| 98  | 1 | 4 | -1.050000 | 4.195385345  | 25.049798519  | 10.365922068  | 0 | 0 | 0 | # | ob  |
| 99  | 1 | 4 | -1.050000 | 0.153182736  | 20.422203874  | 12.564346262  | 0 | 0 | 0 | # | ob  |
| 100 | 1 | 4 | -1.050000 | 2.741860908  | 19.678589700  | 12.565579711  | 0 | 0 | 0 | # | ob  |
| 101 | 1 | 7 | -0.950000 | 1.999257657  | 17.819140996  | 10.345082885  | 0 | 0 | 0 | # | oh  |
| 102 | 1 | 4 | -1.050000 | 4.667081651  | 17.822176970  | 12.393982417  | 0 | 0 | 0 | # | ob  |
| 103 | 1 | 7 | -0.950000 | 4.587607657  | 22.273690996  | 10.345082885  | 0 | 0 | 0 | # | oh  |
| 104 | 1 | 4 | -1.050000 | 2.078731651  | 22.276726970  | 12.393982417  | 0 | 0 | 0 | # | ob  |
| 105 | 1 | 7 | -0.950000 | 3.177442343  | 26.726359004  | 8.319917115   | 0 | 0 | 0 | # | oh  |
| 106 | 1 | 4 | -1.050000 | 0.509618349  | 26.723323030  | 6.271017583   | 0 | 0 | 0 | # | ob  |
| 107 | 1 | 7 | -0.950000 | 0.589092343  | 22.271809004  | 8.319917115   | 0 | 0 | 0 | # | oh  |
| 108 | 1 | 4 | -1.050000 | 3.097968349  | 22.268773030  | 6.271017583   | 0 | 0 | 0 | # | ob  |
| 109 | 1 | 4 | -1.050000 | 4.194805513  | 19.499100680  | 10.366131378  | 0 | 0 | 0 | # | ob  |
| 110 | 1 | 4 | -1.050000 | 0.153510908  | 24.133139700  | 12.565579711  | 0 | 0 | 0 | # | ob  |
| 111 | 1 | 4 | -1.050000 | 3.569664655  | 23.950251481  | 8.299077932   | 0 | 0 | 0 | # | ob  |
| 112 | 1 | 4 | -1.050000 | 2.435167264  | 19.668746126  | 6.100653738   | 0 | 0 | 0 | # | ob  |
| 113 | 1 | 8 | 2.100000  | 4.222997014  | 19.345319204  | 11.995277170  | 0 | 0 | 0 | # | st  |
| 114 | 1 | 8 | 2.100000  | 3.542027774  | 23.791570782  | 6.670701903   | 0 | 0 | 0 | # | st  |
| 115 | 1 | 8 | 2.100000  | 0.953702986  | 25.200180796  | 6.669722830   | 0 | 0 | 0 | # | st  |
| 116 | 1 | 8 | 2.100000  | 3.542052986  | 20.745630796  | 6.669722830   | 0 | 0 | 0 | # | st  |
| 117 | 1 | 8 | 2.100000  | 4.223022226  | 25.208479218  | 11.994298097  | 0 | 0 | 0 | # | st  |
| 118 | 1 | 8 | 2.100000  | 1.634672226  | 20.753929218  | 11.994298097  | 0 | 0 | 0 | # | st  |
| 119 | 1 | 8 | 2.100000  | 1.634647014  | 23.799869204  | 11.995277170  | 0 | 0 | 0 | # | st  |
| 120 | 1 | 8 | 2.100000  | 0.953677774  | 19.337020782  | 6.670701903   | 0 | 0 | 0 | # | st  |
| 121 | 1 | 1 | 1.575000  | 2.588555029  | -27.434438432 | 9.332770632   | 0 | 1 | 0 | # | ao  |
| 122 | 1 | 1 | 1.575000  | 0.000205029  | -22.979888432 | 9.332770632   | 0 | 1 | 0 | # | ao  |
| 123 | 1 | 1 | 1.575000  | 2.588144971  | -21.474661568 | 9.332229368   | 0 | 1 | 0 | # | ao  |
| 124 | 1 | 1 | 1.575000  | 5.176494971  | -25.929211568 | 9.332229368   | 0 | 1 | 0 | # | ao  |
| 125 | 1 | 2 | 0.425000  | 3.734650872  | -24.451832678 | 10.818615063  | 0 | 1 | 0 | # | ho  |
| 126 | 1 | 2 | 0.425000  | 1.146300872  | 26.730017322  | 10.818615063  | 0 | 0 | 0 | # | ho  |
| 127 | 1 | 2 | 0.425000  | 1.442049128  | -24.457267322 | 7.846384937   | 0 | 1 | 0 | # | ho  |
| 128 | 1 | 3 | 0.425000  | 4.030399128  | -20.002717322 | 7.846384937   | 0 | 1 | 0 | # | do  |
| 129 | 1 | 4 | -1.050000 | 0.981314655  | -27.231598519 | 8.299077932   | 0 | 1 | 0 | # | ob  |
| 130 | 1 | 4 | -1.050000 | 5.023517264  | -22.604003874 | 6.100653738   | 0 | 1 | 0 | # | ob  |
| 131 | 1 | 4 | -1.050000 | 3.570244487  | -26.135450680 | 8.298868622   | 0 | 1 | 0 | # | ob  |
| 132 | 1 | 4 | -1.050000 | 2.434839092  | -21.860389700 | 6.099420289   | 0 | 1 | 0 | # | ob  |
| 133 | 1 | 4 | -1.050000 | 0.981894487  | -21.680900680 | 8.298868622   | 0 | 1 | 0 | # | ob  |
| 134 | 1 | 4 | -1.050000 | 1.606455513  | -22.773649320 | 10.366131378  | 0 | 1 | 0 | # | ob  |
| 135 | 1 | 4 | -1.050000 | 5.023189092  | -26.314939700 | 6.099420289   | 0 | 1 | 0 | # | ob  |
| 136 | 1 | 4 | -1.050000 | 1.607035345  | -26.132051481 | 10.365922068  | 0 | 1 | 0 | # | ob  |
| 137 | 1 | 4 | -1.050000 | 2.741532736  | -21.850546126 | 12.564346262  | 0 | 1 | 0 | # | ob  |
| 138 | 1 | 4 | -1.050000 | 4.195385345  | -21.677501481 | 10.365922068  | 0 | 1 | 0 | # | ob  |
| 139 | 1 | 4 | -1.050000 | 0.153182736  | -26.305096126 | 12.564346262  | 0 | 1 | 0 | # | ob  |
| 140 | 1 | 4 | -1.050000 | 2.741860908  | -27.048710300 | 12.565579711  | 0 | 1 | 0 | # | ob  |
| 141 | 1 | 7 | -0.950000 | 1.999257657  | 26.728240996  | 10.345082885  | 0 | 0 | 0 | # | oh  |
| 142 | 1 | 4 | -1.050000 | 4.667081651  | 26.731276970  | 12.393982417  | 0 | 0 | 0 | # | ob  |
| 143 | 1 | 7 | -0.950000 | 4.587607657  | -24.453609004 | 10.345082885  | 0 | 1 | 0 | # | oh  |
| 144 | 1 | 4 | -1.050000 | 2.078731651  | -24.450573030 | 12.393982417  | 0 | 1 | 0 | # | ob  |
| 145 | 1 | 5 | -0.950000 | 3.177442343  | -20.000940996 | 8.319917115   | 0 | 1 | 0 | # | oho |
| 146 | 1 | 6 | -0.950000 | 0.509618349  | -20.003976970 | 6.271017583   | 0 | 1 | 0 | # | oht |
| 147 | 1 | 7 | -0.950000 | 0.589092343  | -24.455490996 | 8.319917115   | 0 | 1 | 0 | # | oh  |
| 148 | 1 | 4 | -1.050000 | 3.097968349  | -24.458526970 | 6.271017583   | 0 | 1 | 0 | # | ob  |
| 149 | 1 | 4 | -1.050000 | 4.194805513  | -27.228199320 | 10.366131378  | 0 | 1 | 0 | # | ob  |
| 150 | 1 | 4 | -1.050000 | 0.153510908  | -22.594160300 | 12.565579711  | 0 | 1 | 0 | # | ob  |
| 151 | 1 | 4 | -1.050000 | 3.569664655  | -22.777048519 | 8.299077932   | 0 | 1 | 0 | # | ob  |
| 152 | 1 | 4 | -1.050000 | 2.435167264  | -27.058553874 | 6.100653738   | 0 | 1 | 0 | # | ob  |
| 153 | 1 | 8 | 2.100000  | 4.222997014  | -27.381980796 | 11.995277170  | 0 | 1 | 0 | # | st  |
| 154 | 1 | 8 | 2.100000  | 3.542027774  | -22.935729218 | 6.670701903   | 0 | 1 | 0 | # | st  |
| 155 | 1 | 8 | 2.100000  | 0.953702986  | -21.527119204 | 6.669722830   | 0 | 1 | 0 | # | st  |
| 156 | 1 | 8 | 2.100000  | 3.542052986  | -25.981669204 | 6.669722830   | 0 | 1 | 0 | # | st  |
| 157 | 1 | 8 | 2.100000  | 4.223022226  | -21.518820782 | 11.994298097  | 0 | 1 | 0 | # | st  |
| 158 | 1 | 8 | 2.100000  | 1.634672226  | -25.973370782 | 11.994298097  | 0 | 1 | 0 | # | st  |
| 159 | 1 | 8 | 2.100000  | 1.634647014  | -22.927430796 | 11.995277170  | 0 | 1 | 0 | # | st  |
| 160 | 1 | 8 | 2.100000  | 0.953677774  | -27.390279218 | 6.670701903   | 0 | 1 | 0 | # | st  |
| 161 | 1 | 6 | -0.950000 | 4.737466427  | -19.680858114 | -16.076279050 | 0 | 1 | 1 | # | oht |
| 162 | 1 | 6 | -0.950000 | 0.304938203  | -0.272172439  | 15.863272887  | 0 | 0 | 0 | # | oht |
| 163 | 1 | 3 | 0.425000  | 4.999988619  | -1.054326608  | -15.567929463 | 0 | 0 | 1 | # | do  |
| 164 | 1 | 3 | 0.425000  | 4.863848964  | -18.596754758 | -16.278386456 | 0 | 1 | 1 | # | do  |
| 165 | 1 | 3 | 0.425000  | 0.113048915  | -19.012312375 | 15.301136949  | 0 | 1 | 0 | # | do  |
| 166 | 2 | 1 | 1.575000  | 7.765255029  | 1.474661568   | 9.332770632   | 0 | 0 | 0 | # | ao  |
| 167 | 2 | 1 | 1.575000  | 5.176905029  | 5.929211568   | 9.332770632   | 0 | 0 | 0 | # | ao  |
| 168 | 2 | 1 | 1.575000  | 7.764844971  | 7.434438432   | 9.332229368   | 0 | 0 | 0 | # | ao  |
| 169 | 2 | 1 | 1.575000  | 10.353194971 | 2.979888432   | 9.332229368   | 0 | 0 | 0 | # | ao  |
| 170 | 2 | 2 | 0.425000  | 8.911350872  | 4.457267322   | 10.818615063  | 0 | 0 | 0 | # | ho  |
| 171 | 2 | 3 | 0.425000  | 6.323000872  | 0.002717322   | 10.818615063  | 0 | 0 | 0 | # | do  |
| 172 | 2 | 2 | 0.425000  | 6.618749128  | 4.451832678   | 7.846384937   | 0 | 0 | 0 | # | ho  |
| 173 | 2 | 2 | 0.425000  | 9.207099128  | 8.906382678   | 7.846384937   | 0 | 0 | 0 | # | ho  |
| 174 | 2 | 4 | -1.050000 | 6.158014655  | 1.677501481   | 8.299077932   | 0 | 0 | 0 | # | ob  |
| 175 | 2 | 4 | -1.050000 | 10.200217264 | 6.305096126   | 6.100653738   | 0 | 0 | 0 | # | ob  |
| 176 | 2 | 4 | -1.050000 | 8.746944487  | 2.773649320   | 8.298868622   | 0 | 0 | 0 | # | ob  |
| 177 | 2 | 4 | -1.050000 | 7.611539092  | 7.048710300   | 6.099420289   | 0 | 0 | 0 | # | ob  |
| 178 | 2 | 4 | -1.050000 | 6.158594487  | 7.228199320   | 8.298868622   | 0 | 0 | 0 | # | ob  |

|     |   |   |           |              |              |              |   |   |   |   |    |
|-----|---|---|-----------|--------------|--------------|--------------|---|---|---|---|----|
| 179 | 2 | 4 | -1.050000 | 6.783155513  | 6.135450680  | 10.366131378 | 0 | 0 | 0 | # | ob |
| 180 | 2 | 4 | -1.050000 | 10.199889092 | 2.594160300  | 6.099420289  | 0 | 0 | 0 | # | ob |
| 181 | 2 | 4 | -1.050000 | 6.783735345  | 2.777048519  | 10.365922068 | 0 | 0 | 0 | # | ob |
| 182 | 2 | 4 | -1.050000 | 7.918232736  | 7.058553874  | 12.564346262 | 0 | 0 | 0 | # | ob |
| 183 | 2 | 4 | -1.050000 | 9.372085345  | 7.231598519  | 10.365922068 | 0 | 0 | 0 | # | ob |
| 184 | 2 | 4 | -1.050000 | 5.329882736  | 2.604003874  | 12.564346262 | 0 | 0 | 0 | # | ob |
| 185 | 2 | 4 | -1.050000 | 7.918560908  | 1.860389700  | 12.565579711 | 0 | 0 | 0 | # | ob |
| 186 | 2 | 5 | -0.950000 | 7.175957657  | 0.000940996  | 10.345082885 | 0 | 0 | 0 | # | oh |
| 187 | 2 | 6 | -0.950000 | 9.843781651  | 0.003976970  | 12.393982417 | 0 | 0 | 0 | # | oh |
| 188 | 2 | 7 | -0.950000 | 9.764307657  | 4.455490996  | 10.345082885 | 0 | 0 | 0 | # | oh |
| 189 | 2 | 4 | -1.050000 | 7.255431651  | 4.458526970  | 12.393982417 | 0 | 0 | 0 | # | ob |
| 190 | 2 | 7 | -0.950000 | 8.354142343  | 8.908159004  | 8.319917115  | 0 | 0 | 0 | # | oh |
| 191 | 2 | 4 | -1.050000 | 5.686318349  | 8.905123030  | 6.271017583  | 0 | 0 | 0 | # | ob |
| 192 | 2 | 7 | -0.950000 | 5.765792343  | 4.453609004  | 8.319917115  | 0 | 0 | 0 | # | oh |
| 193 | 2 | 4 | -1.050000 | 8.274668349  | 4.450573030  | 6.271017583  | 0 | 0 | 0 | # | ob |
| 194 | 2 | 4 | -1.050000 | 9.371505513  | 1.680900680  | 10.366131378 | 0 | 0 | 0 | # | ob |
| 195 | 2 | 4 | -1.050000 | 5.330210908  | 6.314939700  | 12.565579711 | 0 | 0 | 0 | # | ob |
| 196 | 2 | 4 | -1.050000 | 8.746364655  | 6.132051481  | 8.299077932  | 0 | 0 | 0 | # | ob |
| 197 | 2 | 4 | -1.050000 | 7.611867264  | 1.850546126  | 6.100653738  | 0 | 0 | 0 | # | ob |
| 198 | 2 | 8 | 2.100000  | 9.399697014  | 1.527119204  | 11.995277170 | 0 | 0 | 0 | # | st |
| 199 | 2 | 8 | 2.100000  | 8.718727774  | 5.973370782  | 6.670701903  | 0 | 0 | 0 | # | st |
| 200 | 2 | 8 | 2.100000  | 6.130402986  | 7.381980796  | 6.669722830  | 0 | 0 | 0 | # | st |
| 201 | 2 | 8 | 2.100000  | 8.718752986  | 2.927430796  | 6.669722830  | 0 | 0 | 0 | # | st |
| 202 | 2 | 8 | 2.100000  | 9.399722226  | 7.390279218  | 11.994298097 | 0 | 0 | 0 | # | st |
| 203 | 2 | 8 | 2.100000  | 6.811372226  | 2.935729218  | 11.994298097 | 0 | 0 | 0 | # | st |
| 204 | 2 | 8 | 2.100000  | 6.811347014  | 5.981669204  | 11.995277170 | 0 | 0 | 0 | # | st |
| 205 | 2 | 8 | 2.100000  | 6.130377774  | 1.518820782  | 6.670701903  | 0 | 0 | 0 | # | st |
| 206 | 2 | 1 | 1.575000  | 7.765255029  | 10.383761568 | 9.332770632  | 0 | 0 | 0 | # | ao |
| 207 | 2 | 1 | 1.575000  | 5.176905029  | 14.838311568 | 9.332770632  | 0 | 0 | 0 | # | ao |
| 208 | 2 | 1 | 1.575000  | 7.764844971  | 16.343538432 | 9.332229368  | 0 | 0 | 0 | # | ao |
| 209 | 2 | 1 | 1.575000  | 10.353194971 | 11.888988432 | 9.332229368  | 0 | 0 | 0 | # | ao |
| 210 | 2 | 2 | 0.425000  | 8.911350872  | 13.366367322 | 10.818615063 | 0 | 0 | 0 | # | ho |
| 211 | 2 | 2 | 0.425000  | 6.323000872  | 8.911817322  | 10.818615063 | 0 | 0 | 0 | # | ho |
| 212 | 2 | 2 | 0.425000  | 6.618749128  | 13.360932678 | 7.846384937  | 0 | 0 | 0 | # | ho |
| 213 | 2 | 2 | 0.425000  | 9.207099128  | 17.815482678 | 7.846384937  | 0 | 0 | 0 | # | ho |
| 214 | 2 | 4 | -1.050000 | 6.158014655  | 10.586601481 | 8.299077932  | 0 | 0 | 0 | # | ob |
| 215 | 2 | 4 | -1.050000 | 10.200217264 | 15.214196126 | 6.100653738  | 0 | 0 | 0 | # | ob |
| 216 | 2 | 4 | -1.050000 | 8.746944487  | 11.682749320 | 8.298868622  | 0 | 0 | 0 | # | ob |
| 217 | 2 | 4 | -1.050000 | 7.611539092  | 15.957810300 | 6.099420289  | 0 | 0 | 0 | # | ob |
| 218 | 2 | 4 | -1.050000 | 6.158594487  | 16.137299320 | 8.298868622  | 0 | 0 | 0 | # | ob |
| 219 | 2 | 4 | -1.050000 | 6.783155513  | 15.044550680 | 10.366131378 | 0 | 0 | 0 | # | ob |
| 220 | 2 | 4 | -1.050000 | 10.199889092 | 11.503260300 | 6.099420289  | 0 | 0 | 0 | # | ob |
| 221 | 2 | 4 | -1.050000 | 6.783735345  | 11.686148519 | 10.365922068 | 0 | 0 | 0 | # | ob |
| 222 | 2 | 4 | -1.050000 | 7.918232736  | 15.967653874 | 12.564346262 | 0 | 0 | 0 | # | ob |
| 223 | 2 | 4 | -1.050000 | 9.372085345  | 16.140698519 | 10.365922068 | 0 | 0 | 0 | # | ob |
| 224 | 2 | 4 | -1.050000 | 5.329882736  | 11.513103874 | 12.564346262 | 0 | 0 | 0 | # | ob |
| 225 | 2 | 4 | -1.050000 | 7.918560908  | 10.769489700 | 12.565579711 | 0 | 0 | 0 | # | ob |
| 226 | 2 | 7 | -0.950000 | 7.175957657  | 8.910040996  | 10.345082885 | 0 | 0 | 0 | # | oh |
| 227 | 2 | 4 | -1.050000 | 9.843781651  | 8.913076970  | 12.393982417 | 0 | 0 | 0 | # | ob |
| 228 | 2 | 7 | -0.950000 | 9.764307657  | 13.364590996 | 10.345082885 | 0 | 0 | 0 | # | oh |
| 229 | 2 | 4 | -1.050000 | 7.255431651  | 13.367626970 | 12.393982417 | 0 | 0 | 0 | # | ob |
| 230 | 2 | 7 | -0.950000 | 8.354142343  | 17.817259004 | 8.319917115  | 0 | 0 | 0 | # | oh |
| 231 | 2 | 4 | -1.050000 | 5.686318349  | 17.814223030 | 6.271017583  | 0 | 0 | 0 | # | ob |
| 232 | 2 | 7 | -0.950000 | 5.765792343  | 13.362709004 | 8.319917115  | 0 | 0 | 0 | # | oh |
| 233 | 2 | 4 | -1.050000 | 8.274668349  | 13.359673030 | 6.271017583  | 0 | 0 | 0 | # | ob |
| 234 | 2 | 4 | -1.050000 | 9.371505513  | 10.590000680 | 10.366131378 | 0 | 0 | 0 | # | ob |
| 235 | 2 | 4 | -1.050000 | 5.330210908  | 15.224039700 | 12.565579711 | 0 | 0 | 0 | # | ob |
| 236 | 2 | 4 | -1.050000 | 8.746364655  | 15.041151481 | 8.299077932  | 0 | 0 | 0 | # | ob |
| 237 | 2 | 4 | -1.050000 | 7.611867264  | 10.759646126 | 6.100653738  | 0 | 0 | 0 | # | ob |
| 238 | 2 | 8 | 2.100000  | 9.399697014  | 10.436219204 | 11.995277170 | 0 | 0 | 0 | # | st |
| 239 | 2 | 8 | 2.100000  | 8.718727774  | 14.882470782 | 6.670701903  | 0 | 0 | 0 | # | st |
| 240 | 2 | 8 | 2.100000  | 6.130402986  | 16.291080796 | 6.669722830  | 0 | 0 | 0 | # | st |
| 241 | 2 | 8 | 2.100000  | 8.718752986  | 11.836530796 | 6.669722830  | 0 | 0 | 0 | # | st |
| 242 | 2 | 8 | 2.100000  | 9.399722226  | 16.299379218 | 11.994298097 | 0 | 0 | 0 | # | st |
| 243 | 2 | 8 | 2.100000  | 6.811372226  | 11.844829218 | 11.994298097 | 0 | 0 | 0 | # | st |
| 244 | 2 | 8 | 2.100000  | 6.811347014  | 14.890769204 | 11.995277170 | 0 | 0 | 0 | # | st |
| 245 | 2 | 8 | 2.100000  | 6.130377774  | 10.427920782 | 6.670701903  | 0 | 0 | 0 | # | st |
| 246 | 2 | 1 | 1.575000  | 7.765255029  | 19.292861568 | 9.332770632  | 0 | 0 | 0 | # | ao |
| 247 | 2 | 1 | 1.575000  | 5.176905029  | 23.747411568 | 9.332770632  | 0 | 0 | 0 | # | ao |
| 248 | 2 | 1 | 1.575000  | 7.764844971  | 25.252638432 | 9.332229368  | 0 | 0 | 0 | # | ao |
| 249 | 2 | 1 | 1.575000  | 10.353194971 | 20.798088432 | 9.332229368  | 0 | 0 | 0 | # | ao |
| 250 | 2 | 2 | 0.425000  | 8.911350872  | 22.275467322 | 10.818615063 | 0 | 0 | 0 | # | ho |
| 251 | 2 | 2 | 0.425000  | 6.323000872  | 17.820917322 | 10.818615063 | 0 | 0 | 0 | # | ho |
| 252 | 2 | 2 | 0.425000  | 6.618749128  | 22.270032678 | 7.846384937  | 0 | 0 | 0 | # | ho |
| 253 | 2 | 2 | 0.425000  | 9.207099128  | 26.724582678 | 7.846384937  | 0 | 0 | 0 | # | ho |
| 254 | 2 | 4 | -1.050000 | 6.158014655  | 19.495701481 | 8.299077932  | 0 | 0 | 0 | # | ob |
| 255 | 2 | 4 | -1.050000 | 10.200217264 | 24.123296126 | 6.100653738  | 0 | 0 | 0 | # | ob |
| 256 | 2 | 4 | -1.050000 | 8.746944487  | 20.591849320 | 8.298868622  | 0 | 0 | 0 | # | ob |
| 257 | 2 | 4 | -1.050000 | 7.611539092  | 24.866910300 | 6.099420289  | 0 | 0 | 0 | # | ob |
| 258 | 2 | 4 | -1.050000 | 6.158594487  | 25.046399320 | 8.298868622  | 0 | 0 | 0 | # | ob |
| 259 | 2 | 4 | -1.050000 | 6.783155513  | 23.953650680 | 10.366131378 | 0 | 0 | 0 | # | ob |
| 260 | 2 | 4 | -1.050000 | 10.199889092 | 20.412360300 | 6.099420289  | 0 | 0 | 0 | # | ob |
| 261 | 2 | 4 | -1.050000 | 6.783735345  | 20.595248519 | 10.365922068 | 0 | 0 | 0 | # | ob |
| 262 | 2 | 4 | -1.050000 | 7.918232736  | 24.876753874 | 12.564346262 | 0 | 0 | 0 | # | ob |
| 263 | 2 | 4 | -1.050000 | 9.372085345  | 25.049798519 | 10.365922068 | 0 | 0 | 0 | # | ob |
| 264 | 2 | 4 | -1.050000 | 5.329882736  | 20.422203874 | 12.564346262 | 0 | 0 | 0 | # | ob |
| 265 | 2 | 4 | -1.050000 | 7.918560908  | 19.678589700 | 12.565579711 | 0 | 0 | 0 | # | ob |
| 266 | 2 | 7 | -0.950000 | 7.175957657  | 17.819140996 | 10.345082885 | 0 | 0 | 0 | # | oh |
| 267 | 2 | 4 | -1.050000 | 9.843781651  | 17.822176970 | 12.393982417 | 0 | 0 | 0 | # | ob |
| 268 | 2 | 7 | -0.950000 | 9.764307657  | 22.273690996 | 10.345082885 | 0 | 0 | 0 | # | oh |
| 269 | 2 | 4 | -1.050000 | 7.255431651  | 22.276726970 | 12.393982417 | 0 | 0 | 0 | # | ob |
| 270 | 2 | 7 | -0.950000 | 8.354142343  | 26.726359004 | 8.319917115  | 0 | 0 | 0 | # | oh |
| 271 | 2 | 4 | -1.050000 | 5.686318349  | 26.723323030 | 6.271017583  | 0 | 0 | 0 | # | ob |

|     |   |   |           |              |               |               |   |   |   |     |
|-----|---|---|-----------|--------------|---------------|---------------|---|---|---|-----|
| 272 | 2 | 7 | -0.950000 | 5.765792343  | 22.271809004  | 8.319917115   | 0 | 0 | 0 | oh  |
| 273 | 2 | 4 | -1.050000 | 8.274668349  | 22.268773030  | 6.271017583   | 0 | 0 | 0 | ob  |
| 274 | 2 | 4 | -1.050000 | 9.371505513  | 19.499100680  | 10.366131378  | 0 | 0 | 0 | ob  |
| 275 | 2 | 4 | -1.050000 | 5.330210908  | 24.133139700  | 12.565579711  | 0 | 0 | 0 | ob  |
| 276 | 2 | 4 | -1.050000 | 8.746364655  | 23.950251481  | 8.299077932   | 0 | 0 | 0 | ob  |
| 277 | 2 | 4 | -1.050000 | 7.611867264  | 19.668746126  | 6.100653738   | 0 | 0 | 0 | ob  |
| 278 | 2 | 8 | 2.100000  | 9.399697014  | 19.345319204  | 11.995277170  | 0 | 0 | 0 | st  |
| 279 | 2 | 8 | 2.100000  | 8.718727774  | 23.791570782  | 6.670701903   | 0 | 0 | 0 | st  |
| 280 | 2 | 8 | 2.100000  | 6.130402986  | 25.200180796  | 6.669722830   | 0 | 0 | 0 | st  |
| 281 | 2 | 8 | 2.100000  | 8.718752986  | 20.745630796  | 6.669722830   | 0 | 0 | 0 | st  |
| 282 | 2 | 8 | 2.100000  | 9.399722226  | 25.208479218  | 11.994298097  | 0 | 0 | 0 | st  |
| 283 | 2 | 8 | 2.100000  | 6.811372226  | 20.753929218  | 11.994298097  | 0 | 0 | 0 | st  |
| 284 | 2 | 8 | 2.100000  | 6.811347014  | 23.799869204  | 11.995277170  | 0 | 0 | 0 | st  |
| 285 | 2 | 8 | 2.100000  | 6.130377774  | 19.337020782  | 6.670701903   | 0 | 0 | 0 | st  |
| 286 | 2 | 1 | 1.575000  | 7.765255029  | -27.434438432 | 9.332770632   | 0 | 1 | 0 | ao  |
| 287 | 2 | 1 | 1.575000  | 5.176905029  | -22.979888432 | 9.332770632   | 0 | 1 | 0 | ao  |
| 288 | 2 | 1 | 1.575000  | 7.764844971  | -21.474661568 | 9.332229368   | 0 | 1 | 0 | ao  |
| 289 | 2 | 1 | 1.575000  | 10.353194971 | -25.929211568 | 9.332229368   | 0 | 1 | 0 | ao  |
| 290 | 2 | 2 | 0.425000  | 8.911350872  | -24.451832678 | 10.818615063  | 0 | 1 | 0 | ho  |
| 291 | 2 | 2 | 0.425000  | 6.323000872  | 26.730017322  | 10.818615063  | 0 | 0 | 0 | ho  |
| 292 | 2 | 2 | 0.425000  | 6.618749128  | -24.457267322 | 7.846384937   | 0 | 1 | 0 | ho  |
| 293 | 2 | 3 | 0.425000  | 9.207099128  | -20.002717322 | 7.846384937   | 0 | 1 | 0 | do  |
| 294 | 2 | 4 | -1.050000 | 6.158014655  | -27.231598519 | 8.299077932   | 0 | 1 | 0 | ob  |
| 295 | 2 | 4 | -1.050000 | 10.200217264 | -22.604003874 | 6.100653738   | 0 | 1 | 0 | ob  |
| 296 | 2 | 4 | -1.050000 | 8.746944487  | -26.135450680 | 8.298868622   | 0 | 1 | 0 | ob  |
| 297 | 2 | 4 | -1.050000 | 7.611539092  | -21.860389700 | 6.099420289   | 0 | 1 | 0 | ob  |
| 298 | 2 | 4 | -1.050000 | 6.158594487  | -21.680900680 | 8.298868622   | 0 | 1 | 0 | ob  |
| 299 | 2 | 4 | -1.050000 | 6.783155513  | -22.773649320 | 10.366131378  | 0 | 1 | 0 | ob  |
| 300 | 2 | 4 | -1.050000 | 10.199889092 | -26.314939700 | 6.099420289   | 0 | 1 | 0 | ob  |
| 301 | 2 | 4 | -1.050000 | 6.783735345  | -26.132051481 | 10.365922068  | 0 | 1 | 0 | ob  |
| 302 | 2 | 4 | -1.050000 | 7.918232736  | -21.850546126 | 12.564346262  | 0 | 1 | 0 | ob  |
| 303 | 2 | 4 | -1.050000 | 9.372085345  | -21.677501481 | 10.365922068  | 0 | 1 | 0 | ob  |
| 304 | 2 | 4 | -1.050000 | 5.329882736  | -26.305096126 | 12.564346262  | 0 | 1 | 0 | ob  |
| 305 | 2 | 4 | -1.050000 | 7.918560908  | -27.048710300 | 12.565579711  | 0 | 1 | 0 | ob  |
| 306 | 2 | 7 | -0.950000 | 7.175957657  | 26.728240996  | 10.345082885  | 0 | 0 | 0 | oh  |
| 307 | 2 | 4 | -1.050000 | 9.843781651  | 26.731276970  | 12.393982417  | 0 | 0 | 0 | ob  |
| 308 | 2 | 7 | -0.950000 | 9.764307657  | -24.453609004 | 10.345082885  | 0 | 1 | 0 | oh  |
| 309 | 2 | 4 | -1.050000 | 7.255431651  | -24.450573030 | 12.393982417  | 0 | 1 | 0 | ob  |
| 310 | 2 | 5 | -0.950000 | 8.354142343  | -20.000940996 | 8.319917115   | 0 | 1 | 0 | oho |
| 311 | 2 | 6 | -0.950000 | 5.686318349  | -20.003976970 | 6.271017583   | 0 | 1 | 0 | oht |
| 312 | 2 | 7 | -0.950000 | 5.765792343  | -24.455490996 | 8.319917115   | 0 | 1 | 0 | oh  |
| 313 | 2 | 4 | -1.050000 | 8.274668349  | -24.458526970 | 6.271017583   | 0 | 1 | 0 | ob  |
| 314 | 2 | 4 | -1.050000 | 9.371505513  | -27.228199320 | 10.366131378  | 0 | 1 | 0 | ob  |
| 315 | 2 | 4 | -1.050000 | 5.330210908  | -22.594160300 | 12.565579711  | 0 | 1 | 0 | ob  |
| 316 | 2 | 4 | -1.050000 | 8.746364655  | -22.777048519 | 8.299077932   | 0 | 1 | 0 | ob  |
| 317 | 2 | 4 | -1.050000 | 7.611867264  | -27.058553874 | 6.100653738   | 0 | 1 | 0 | ob  |
| 318 | 2 | 8 | 2.100000  | 9.399697014  | -27.381980796 | 11.995277170  | 0 | 1 | 0 | st  |
| 319 | 2 | 8 | 2.100000  | 8.718727774  | -22.935729218 | 6.670701903   | 0 | 1 | 0 | st  |
| 320 | 2 | 8 | 2.100000  | 6.130402986  | -21.527119204 | 6.669722830   | 0 | 1 | 0 | st  |
| 321 | 2 | 8 | 2.100000  | 8.718752986  | -25.981669204 | 6.669722830   | 0 | 1 | 0 | st  |
| 322 | 2 | 8 | 2.100000  | 9.399722226  | -21.518820782 | 11.994298097  | 0 | 1 | 0 | st  |
| 323 | 2 | 8 | 2.100000  | 6.811372226  | -25.973370782 | 11.994298097  | 0 | 1 | 0 | st  |
| 324 | 2 | 8 | 2.100000  | 6.811347014  | -22.927430796 | 11.995277170  | 0 | 1 | 0 | st  |
| 325 | 2 | 8 | 2.100000  | 6.130377774  | -27.390279218 | 6.670701903   | 0 | 1 | 0 | st  |
| 326 | 2 | 6 | -0.950000 | 9.914166427  | -19.680858114 | -16.076279050 | 0 | 1 | 1 | oht |
| 327 | 2 | 6 | -0.950000 | 5.481638203  | -0.272172439  | 15.863272887  | 0 | 0 | 0 | oht |
| 328 | 2 | 3 | 0.425000  | 5.133272253  | -1.308055357  | 15.669139507  | 0 | 0 | 0 | do  |
| 329 | 2 | 3 | 0.425000  | 10.176688619 | -1.054326608  | -15.567929463 | 0 | 0 | 1 | do  |
| 330 | 2 | 3 | 0.425000  | 10.040548964 | -18.596754758 | -16.278386456 | 0 | 1 | 1 | do  |
| 331 | 2 | 3 | 0.425000  | 5.289748915  | -19.012312375 | 15.301136949  | 0 | 1 | 0 | do  |
| 332 | 3 | 1 | 1.575000  | 12.941955029 | 1.474661568   | 9.332770632   | 0 | 0 | 0 | ao  |
| 333 | 3 | 1 | 1.575000  | 10.353605029 | 5.929211568   | 9.332770632   | 0 | 0 | 0 | ao  |
| 334 | 3 | 1 | 1.575000  | 12.941544971 | 7.434438432   | 9.332229368   | 0 | 0 | 0 | ao  |
| 335 | 3 | 1 | 1.575000  | 15.529894971 | 2.979888432   | 9.332229368   | 0 | 0 | 0 | ao  |
| 336 | 3 | 2 | 0.425000  | 14.088050872 | 4.457267322   | 10.818615063  | 0 | 0 | 0 | ho  |
| 337 | 3 | 3 | 0.425000  | 11.499700872 | 0.002717322   | 10.818615063  | 0 | 0 | 0 | do  |
| 338 | 3 | 2 | 0.425000  | 11.795449128 | 4.451832678   | 7.846384937   | 0 | 0 | 0 | ho  |
| 339 | 3 | 2 | 0.425000  | 14.383799128 | 8.906382678   | 7.846384937   | 0 | 0 | 0 | ho  |
| 340 | 3 | 4 | -1.050000 | 11.334714655 | 1.677501481   | 8.299077932   | 0 | 0 | 0 | ob  |
| 341 | 3 | 4 | -1.050000 | 15.376917264 | 6.305096126   | 6.100653738   | 0 | 0 | 0 | ob  |
| 342 | 3 | 4 | -1.050000 | 13.923644487 | 2.773649320   | 8.298868622   | 0 | 0 | 0 | ob  |
| 343 | 3 | 4 | -1.050000 | 12.788239092 | 7.048710300   | 6.099420289   | 0 | 0 | 0 | ob  |
| 344 | 3 | 4 | -1.050000 | 11.335294487 | 7.228199320   | 8.298868622   | 0 | 0 | 0 | ob  |
| 345 | 3 | 4 | -1.050000 | 11.959855513 | 6.135450680   | 10.366131378  | 0 | 0 | 0 | ob  |
| 346 | 3 | 4 | -1.050000 | 15.376589092 | 2.594160300   | 6.099420289   | 0 | 0 | 0 | ob  |
| 347 | 3 | 4 | -1.050000 | 11.960435345 | 2.777048519   | 10.365922068  | 0 | 0 | 0 | ob  |
| 348 | 3 | 4 | -1.050000 | 13.094932736 | 7.058553874   | 12.564346262  | 0 | 0 | 0 | ob  |
| 349 | 3 | 4 | -1.050000 | 14.548785345 | 7.231598519   | 10.365922068  | 0 | 0 | 0 | ob  |
| 350 | 3 | 4 | -1.050000 | 10.506582736 | 2.604003874   | 12.564346262  | 0 | 0 | 0 | ob  |
| 351 | 3 | 4 | -1.050000 | 13.095260908 | 1.860389700   | 12.565579711  | 0 | 0 | 0 | ob  |
| 352 | 3 | 5 | -0.950000 | 12.352657657 | 0.000940996   | 10.345082885  | 0 | 0 | 0 | oho |
| 353 | 3 | 6 | -0.950000 | 15.020481651 | 0.003976970   | 12.393982417  | 0 | 0 | 0 | oht |
| 354 | 3 | 7 | -0.950000 | 14.941007657 | 4.455490996   | 10.345082885  | 0 | 0 | 0 | oh  |
| 355 | 3 | 4 | -1.050000 | 12.432131651 | 4.458526970   | 12.393982417  | 0 | 0 | 0 | ob  |
| 356 | 3 | 7 | -0.950000 | 13.530842343 | 8.908159004   | 8.319917115   | 0 | 0 | 0 | oh  |
| 357 | 3 | 4 | -1.050000 | 10.863018349 | 8.905123030   | 6.271017583   | 0 | 0 | 0 | ob  |
| 358 | 3 | 7 | -0.950000 | 10.942492343 | 4.453609004   | 8.319917115   | 0 | 0 | 0 | oh  |
| 359 | 3 | 4 | -1.050000 | 13.451368349 | 4.450573030   | 6.271017583   | 0 | 0 | 0 | ob  |
| 360 | 3 | 4 | -1.050000 | 14.548205513 | 1.680900680   | 10.366131378  | 0 | 0 | 0 | ob  |
| 361 | 3 | 4 | -1.050000 | 10.506910908 | 6.314939700   | 12.565579711  | 0 | 0 | 0 | ob  |
| 362 | 3 | 4 | -1.050000 | 13.923064655 | 6.132051481   | 8.299077932   | 0 | 0 | 0 | ob  |
| 363 | 3 | 4 | -1.050000 | 12.788567264 | 1.850546126   | 6.100653738   | 0 | 0 | 0 | ob  |
| 364 | 3 | 8 | 2.100000  | 14.576397014 | 1.527119204   | 11.995277170  | 0 | 0 | 0 | st  |

|     |   |   |           |              |               |              |   |   |   |   |    |
|-----|---|---|-----------|--------------|---------------|--------------|---|---|---|---|----|
| 365 | 3 | 8 | 2.100000  | 13.895427774 | 5.973370782   | 6.670701903  | 0 | 0 | 0 | # | st |
| 366 | 3 | 8 | 2.100000  | 11.307102986 | 7.381980796   | 6.669722830  | 0 | 0 | 0 | # | st |
| 367 | 3 | 8 | 2.100000  | 13.895452986 | 2.927430796   | 6.669722830  | 0 | 0 | 0 | # | st |
| 368 | 3 | 8 | 2.100000  | 14.576422226 | 7.390279218   | 11.994298097 | 0 | 0 | 0 | # | st |
| 369 | 3 | 8 | 2.100000  | 11.988072226 | 2.935729218   | 11.994298097 | 0 | 0 | 0 | # | st |
| 370 | 3 | 8 | 2.100000  | 11.988047014 | 5.981669204   | 11.995277170 | 0 | 0 | 0 | # | st |
| 371 | 3 | 8 | 2.100000  | 11.307077774 | 1.518820782   | 6.670701903  | 0 | 0 | 0 | # | st |
| 372 | 3 | 1 | 1.575000  | 12.941955029 | 10.383761568  | 9.332770632  | 0 | 0 | 0 | # | ao |
| 373 | 3 | 1 | 1.575000  | 10.353605029 | 14.838311568  | 9.332770632  | 0 | 0 | 0 | # | ao |
| 374 | 3 | 1 | 1.575000  | 12.941544971 | 16.343538432  | 9.332229368  | 0 | 0 | 0 | # | ao |
| 375 | 3 | 1 | 1.575000  | 15.529894971 | 11.888988432  | 9.332229368  | 0 | 0 | 0 | # | ao |
| 376 | 3 | 2 | 0.425000  | 14.088050872 | 13.366367322  | 10.818615063 | 0 | 0 | 0 | # | ho |
| 377 | 3 | 2 | 0.425000  | 11.499700872 | 8.911817322   | 10.818615063 | 0 | 0 | 0 | # | ho |
| 378 | 3 | 2 | 0.425000  | 11.795449128 | 13.360932678  | 7.846384937  | 0 | 0 | 0 | # | ho |
| 379 | 3 | 2 | 0.425000  | 14.383799128 | 17.815482678  | 7.846384937  | 0 | 0 | 0 | # | ho |
| 380 | 3 | 4 | -1.050000 | 11.334714655 | 10.586601481  | 8.299077932  | 0 | 0 | 0 | # | ob |
| 381 | 3 | 4 | -1.050000 | 15.376917264 | 15.214196126  | 6.100653738  | 0 | 0 | 0 | # | ob |
| 382 | 3 | 4 | -1.050000 | 13.923644487 | 11.682749320  | 8.298868622  | 0 | 0 | 0 | # | ob |
| 383 | 3 | 4 | -1.050000 | 12.788239092 | 15.957810300  | 6.099420289  | 0 | 0 | 0 | # | ob |
| 384 | 3 | 4 | -1.050000 | 11.335294487 | 16.137299320  | 8.298868622  | 0 | 0 | 0 | # | ob |
| 385 | 3 | 4 | -1.050000 | 11.959855513 | 15.044550680  | 10.366131378 | 0 | 0 | 0 | # | ob |
| 386 | 3 | 4 | -1.050000 | 15.376589092 | 11.503260300  | 6.099420289  | 0 | 0 | 0 | # | ob |
| 387 | 3 | 4 | -1.050000 | 11.960435345 | 11.686148519  | 10.365922068 | 0 | 0 | 0 | # | ob |
| 388 | 3 | 4 | -1.050000 | 13.094932736 | 15.967653874  | 12.564346262 | 0 | 0 | 0 | # | ob |
| 389 | 3 | 4 | -1.050000 | 14.548785345 | 16.140698519  | 10.365922068 | 0 | 0 | 0 | # | ob |
| 390 | 3 | 4 | -1.050000 | 10.506582736 | 11.513103874  | 12.564346262 | 0 | 0 | 0 | # | ob |
| 391 | 3 | 4 | -1.050000 | 13.095260908 | 10.769489700  | 12.565579711 | 0 | 0 | 0 | # | ob |
| 392 | 3 | 7 | -0.950000 | 12.352657657 | 8.910040996   | 10.345082885 | 0 | 0 | 0 | # | oh |
| 393 | 3 | 4 | -1.050000 | 15.020481651 | 8.913076970   | 12.393982417 | 0 | 0 | 0 | # | ob |
| 394 | 3 | 7 | -0.950000 | 14.941007657 | 13.364590996  | 10.345082885 | 0 | 0 | 0 | # | oh |
| 395 | 3 | 4 | -1.050000 | 12.432131651 | 13.367626970  | 12.393982417 | 0 | 0 | 0 | # | ob |
| 396 | 3 | 7 | -0.950000 | 13.530842343 | 17.817259004  | 8.319917115  | 0 | 0 | 0 | # | oh |
| 397 | 3 | 4 | -1.050000 | 10.863018349 | 17.814223030  | 6.271017583  | 0 | 0 | 0 | # | ob |
| 398 | 3 | 7 | -0.950000 | 10.942492343 | 13.362709004  | 8.319917115  | 0 | 0 | 0 | # | oh |
| 399 | 3 | 4 | -1.050000 | 13.451368349 | 13.359673030  | 6.271017583  | 0 | 0 | 0 | # | ob |
| 400 | 3 | 4 | -1.050000 | 14.548205513 | 10.590000680  | 10.366131378 | 0 | 0 | 0 | # | ob |
| 401 | 3 | 4 | -1.050000 | 10.506910908 | 15.224039700  | 12.565579711 | 0 | 0 | 0 | # | ob |
| 402 | 3 | 4 | -1.050000 | 13.923064655 | 15.041151481  | 8.299077932  | 0 | 0 | 0 | # | ob |
| 403 | 3 | 4 | -1.050000 | 12.788567264 | 10.759646126  | 6.100653738  | 0 | 0 | 0 | # | ob |
| 404 | 3 | 8 | 2.100000  | 14.576397014 | 10.436219204  | 11.995277170 | 0 | 0 | 0 | # | st |
| 405 | 3 | 8 | 2.100000  | 13.895427774 | 14.882470782  | 6.670701903  | 0 | 0 | 0 | # | st |
| 406 | 3 | 8 | 2.100000  | 11.307102986 | 16.291080796  | 6.669722830  | 0 | 0 | 0 | # | st |
| 407 | 3 | 8 | 2.100000  | 13.895452986 | 11.836530796  | 6.669722830  | 0 | 0 | 0 | # | st |
| 408 | 3 | 8 | 2.100000  | 14.576422226 | 16.299379218  | 11.994298097 | 0 | 0 | 0 | # | st |
| 409 | 3 | 8 | 2.100000  | 11.988072226 | 11.844829218  | 11.994298097 | 0 | 0 | 0 | # | st |
| 410 | 3 | 8 | 2.100000  | 11.988047014 | 14.890769204  | 11.995277170 | 0 | 0 | 0 | # | st |
| 411 | 3 | 8 | 2.100000  | 11.307077774 | 10.427920782  | 6.670701903  | 0 | 0 | 0 | # | st |
| 412 | 3 | 1 | 1.575000  | 12.941955029 | 19.292861568  | 9.332770632  | 0 | 0 | 0 | # | ao |
| 413 | 3 | 1 | 1.575000  | 10.353605029 | 23.747411568  | 9.332770632  | 0 | 0 | 0 | # | ao |
| 414 | 3 | 1 | 1.575000  | 12.941544971 | 25.252638432  | 9.332229368  | 0 | 0 | 0 | # | ao |
| 415 | 3 | 1 | 1.575000  | 15.529894971 | 20.798088432  | 9.332229368  | 0 | 0 | 0 | # | ao |
| 416 | 3 | 2 | 0.425000  | 14.088050872 | 22.275467322  | 10.818615063 | 0 | 0 | 0 | # | ho |
| 417 | 3 | 2 | 0.425000  | 11.499700872 | 17.820917322  | 10.818615063 | 0 | 0 | 0 | # | ho |
| 418 | 3 | 2 | 0.425000  | 11.795449128 | 22.270032678  | 7.846384937  | 0 | 0 | 0 | # | ho |
| 419 | 3 | 2 | 0.425000  | 14.383799128 | 26.724582678  | 7.846384937  | 0 | 0 | 0 | # | ho |
| 420 | 3 | 4 | -1.050000 | 11.334714655 | 19.495701481  | 8.299077932  | 0 | 0 | 0 | # | ob |
| 421 | 3 | 4 | -1.050000 | 15.376917264 | 24.123296126  | 6.100653738  | 0 | 0 | 0 | # | ob |
| 422 | 3 | 4 | -1.050000 | 13.923644487 | 20.591849320  | 8.298868622  | 0 | 0 | 0 | # | ob |
| 423 | 3 | 4 | -1.050000 | 12.788239092 | 24.866910300  | 6.099420289  | 0 | 0 | 0 | # | ob |
| 424 | 3 | 4 | -1.050000 | 11.335294487 | 25.046399320  | 8.298868622  | 0 | 0 | 0 | # | ob |
| 425 | 3 | 4 | -1.050000 | 11.959855513 | 23.953650680  | 10.366131378 | 0 | 0 | 0 | # | ob |
| 426 | 3 | 4 | -1.050000 | 15.376589092 | 20.412360300  | 6.099420289  | 0 | 0 | 0 | # | ob |
| 427 | 3 | 4 | -1.050000 | 11.960435345 | 20.595248519  | 10.365922068 | 0 | 0 | 0 | # | ob |
| 428 | 3 | 4 | -1.050000 | 13.094932736 | 24.876753874  | 12.564346262 | 0 | 0 | 0 | # | ob |
| 429 | 3 | 4 | -1.050000 | 14.548785345 | 25.049798519  | 10.365922068 | 0 | 0 | 0 | # | ob |
| 430 | 3 | 4 | -1.050000 | 10.506582736 | 20.422203874  | 12.564346262 | 0 | 0 | 0 | # | ob |
| 431 | 3 | 4 | -1.050000 | 13.095260908 | 19.678589700  | 12.565579711 | 0 | 0 | 0 | # | ob |
| 432 | 3 | 7 | -0.950000 | 12.352657657 | 17.819140996  | 10.345082885 | 0 | 0 | 0 | # | oh |
| 433 | 3 | 4 | -1.050000 | 15.020481651 | 17.822176970  | 12.393982417 | 0 | 0 | 0 | # | ob |
| 434 | 3 | 7 | -0.950000 | 14.941007657 | 22.273690996  | 10.345082885 | 0 | 0 | 0 | # | oh |
| 435 | 3 | 4 | -1.050000 | 12.432131651 | 22.276726970  | 12.393982417 | 0 | 0 | 0 | # | ob |
| 436 | 3 | 7 | -0.950000 | 13.530842343 | 26.726359004  | 8.319917115  | 0 | 0 | 0 | # | oh |
| 437 | 3 | 4 | -1.050000 | 10.863018349 | 26.723323030  | 6.271017583  | 0 | 0 | 0 | # | ob |
| 438 | 3 | 7 | -0.950000 | 10.942492343 | 22.271809004  | 8.319917115  | 0 | 0 | 0 | # | oh |
| 439 | 3 | 4 | -1.050000 | 13.451368349 | 22.268773030  | 6.271017583  | 0 | 0 | 0 | # | ob |
| 440 | 3 | 4 | -1.050000 | 14.548205513 | 19.499100680  | 10.366131378 | 0 | 0 | 0 | # | ob |
| 441 | 3 | 4 | -1.050000 | 10.506910908 | 24.133139700  | 12.565579711 | 0 | 0 | 0 | # | ob |
| 442 | 3 | 4 | -1.050000 | 13.923064655 | 23.950251481  | 8.299077932  | 0 | 0 | 0 | # | ob |
| 443 | 3 | 4 | -1.050000 | 12.788567264 | 19.668746126  | 6.100653738  | 0 | 0 | 0 | # | ob |
| 444 | 3 | 8 | 2.100000  | 14.576397014 | 19.345319204  | 11.995277170 | 0 | 0 | 0 | # | st |
| 445 | 3 | 8 | 2.100000  | 13.895427774 | 23.791570782  | 6.670701903  | 0 | 0 | 0 | # | st |
| 446 | 3 | 8 | 2.100000  | 11.307102986 | 25.200180796  | 6.669722830  | 0 | 0 | 0 | # | st |
| 447 | 3 | 8 | 2.100000  | 13.895452986 | 20.745630796  | 6.669722830  | 0 | 0 | 0 | # | st |
| 448 | 3 | 8 | 2.100000  | 14.576422226 | 25.208479218  | 11.994298097 | 0 | 0 | 0 | # | st |
| 449 | 3 | 8 | 2.100000  | 11.988072226 | 20.753929218  | 11.994298097 | 0 | 0 | 0 | # | st |
| 450 | 3 | 8 | 2.100000  | 11.988047014 | 23.799869204  | 11.995277170 | 0 | 0 | 0 | # | st |
| 451 | 3 | 8 | 2.100000  | 11.307077774 | 19.337020782  | 6.670701903  | 0 | 0 | 0 | # | st |
| 452 | 3 | 1 | 1.575000  | 12.941955029 | -27.434438432 | 9.332770632  | 0 | 1 | 0 | # | ao |
| 453 | 3 | 1 | 1.575000  | 10.353605029 | -22.979888432 | 9.332770632  | 0 | 1 | 0 | # | ao |
| 454 | 3 | 1 | 1.575000  | 12.941544971 | -21.474661568 | 9.332229368  | 0 | 1 | 0 | # | ao |
| 455 | 3 | 1 | 1.575000  | 15.529894971 | -25.929211568 | 9.332229368  | 0 | 1 | 0 | # | ao |
| 456 | 3 | 2 | 0.425000  | 14.088050872 | -24.451832678 | 10.818615063 | 0 | 1 | 0 | # | ho |
| 457 | 3 | 2 | 0.425000  | 11.499700872 | 26.730017322  | 10.818615063 | 0 | 0 | 0 | # | ho |

458 3 2 0.425000 11.795449128 -24.457267322 7.846384937 0 1 0 # ho  
459 3 3 0.425000 14.383799128 -20.002717322 7.846384937 0 1 0 # do  
460 3 4 -1.050000 11.334714655 -27.231598519 8.299077932 0 1 0 # ob  
461 3 4 -1.050000 15.376917264 -22.604003874 6.100653738 0 1 0 # ob  
462 3 4 -1.050000 13.923644487 -26.135450680 8.298868622 0 1 0 # ob  
463 3 4 -1.050000 12.788239092 -21.860389700 6.099420289 0 1 0 # ob  
464 3 4 -1.050000 11.335294487 -21.680900680 8.298868622 0 1 0 # ob  
465 3 4 -1.050000 11.959855513 -22.773649320 10.366131378 0 1 0 # ob  
466 3 4 -1.050000 15.376589092 -26.314939700 6.099420289 0 1 0 # ob  
467 3 4 -1.050000 11.960435345 -26.132051481 10.365922068 0 1 0 # ob  
468 3 4 -1.050000 13.094932736 -21.850546126 12.564346262 0 1 0 # ob  
469 3 4 -1.050000 14.548785345 -21.677501481 10.365922068 0 1 0 # ob  
470 3 4 -1.050000 10.506582736 -26.305096126 12.564346262 0 1 0 # ob  
471 3 4 -1.050000 13.095260908 -27.048710300 12.565579711 0 1 0 # ob  
472 3 7 -0.950000 12.352657657 26.728240996 10.345082885 0 0 0 # oh  
473 3 4 -1.050000 15.020481651 26.731276970 12.393982417 0 0 0 # ob  
474 3 7 -0.950000 14.941007657 -24.453609004 10.345082885 0 1 0 # oh  
475 3 4 -1.050000 12.432131651 -24.450573030 12.393982417 0 1 0 # ob  
476 3 5 -0.950000 13.530842343 -20.000940996 8.319917115 0 1 0 # oho  
477 3 6 -0.950000 10.863018349 -20.003976970 6.271017583 0 1 0 # oht  
478 3 7 -0.950000 10.942492343 -24.455490996 8.319917115 0 1 0 # oh  
479 3 4 -1.050000 13.451368349 -24.458526970 6.271017583 0 1 0 # ob  
480 3 4 -1.050000 14.548205513 -27.228199320 10.366131378 0 1 0 # ob  
481 3 4 -1.050000 10.506910908 -22.594160300 12.565579711 0 1 0 # ob  
482 3 4 -1.050000 13.923646555 -22.777048519 8.299077932 0 1 0 # ob  
483 3 4 -1.050000 12.788567264 -27.058553874 6.100653738 0 1 0 # ob  
484 3 8 2.100000 14.576397014 -27.381980796 11.995277170 0 1 0 # st  
485 3 8 2.100000 13.895427774 -22.935729218 6.670701903 0 1 0 # st  
486 3 8 2.100000 11.307102986 -21.527119204 6.669722830 0 1 0 # st  
487 3 8 2.100000 13.895452986 -25.981669204 6.669722830 0 1 0 # st  
488 3 8 2.100000 14.576422226 -21.518820782 11.994298097 0 1 0 # st  
489 3 8 2.100000 11.988072226 -25.973370782 11.994298097 0 1 0 # st  
490 3 8 2.100000 11.988047014 -22.927430796 11.995277170 0 1 0 # st  
491 3 8 2.100000 11.307077774 -27.390279218 6.670701903 0 1 0 # st  
492 3 6 -0.950000 15.090866427 -19.680858114 -16.076279050 0 1 1 # oht  
493 3 6 -0.950000 10.658338203 -0.272172439 15.863272887 0 0 0 # oht  
494 3 3 0.425000 10.309972253 -1.308055357 15.669139507 0 0 0 # do  
495 3 3 0.425000 15.353388619 -1.054326608 -15.567929463 0 0 1 # do  
496 3 3 0.425000 15.217248964 -18.596754758 -16.278386456 0 1 1 # do  
497 3 3 0.425000 10.466448915 -19.012312375 15.301136949 0 1 0 # do  
498 4 1 1.575000 -12.941544971 1.474661568 9.332770632 1 0 0 # ao  
499 4 1 1.575000 -15.529894971 5.929211568 9.332770632 1 0 0 # ao  
500 4 1 1.575000 -12.941955029 7.434438432 9.332229368 1 0 0 # ao  
501 4 1 1.575000 -10.353605029 2.979888432 9.332229368 1 0 0 # ao  
502 4 2 0.425000 -11.795449128 4.457267322 10.818615063 1 0 0 # ho  
503 4 3 0.425000 -14.383799128 0.002717322 10.818615063 1 0 0 # do  
504 4 2 0.425000 -14.088050872 4.451832678 7.846384937 1 0 0 # ho  
505 4 2 0.425000 -11.499700872 8.906382678 7.846384937 1 0 0 # ho  
506 4 4 -1.050000 -14.548785345 1.677501481 8.299077932 1 0 0 # ob  
507 4 4 -1.050000 -10.506582736 6.305096126 6.100653738 1 0 0 # ob  
508 4 4 -1.050000 -11.959855513 2.773649320 8.298868622 1 0 0 # ob  
509 4 4 -1.050000 -13.095260908 7.048710300 6.099420289 1 0 0 # ob  
510 4 4 -1.050000 -14.548205513 7.228199320 8.298868622 1 0 0 # ob  
511 4 4 -1.050000 -13.923644487 6.135450680 10.366131378 1 0 0 # ob  
512 4 4 -1.050000 -10.506910908 2.594160300 6.099420289 1 0 0 # ob  
513 4 4 -1.050000 -13.923064655 2.777048519 10.365922068 1 0 0 # ob  
514 4 4 -1.050000 -12.788567264 7.058553874 12.564346262 1 0 0 # ob  
515 4 4 -1.050000 -11.334714655 7.231598519 10.365922068 1 0 0 # ob  
516 4 4 -1.050000 -15.376917264 2.604003874 12.564346262 1 0 0 # ob  
517 4 4 -1.050000 -12.788239092 1.860389700 12.565579711 1 0 0 # ob  
518 4 5 -0.950000 -13.530842343 0.000940996 10.345082885 1 0 0 # oho  
519 4 6 -0.950000 -10.863018349 0.003976970 12.393982417 1 0 0 # oht  
520 4 7 -0.950000 -10.942492343 4.455490996 10.345082885 1 0 0 # oh  
521 4 4 -1.050000 -13.451368349 4.458526970 12.393982417 1 0 0 # ob  
522 4 7 -0.950000 -12.352657657 8.908159004 8.319917115 1 0 0 # oh  
523 4 4 -1.050000 -15.020481651 8.905123030 6.271017583 1 0 0 # ob  
524 4 7 -0.950000 -14.941007657 4.453609004 8.319917115 1 0 0 # oh  
525 4 4 -1.050000 -12.432131651 4.450573030 6.271017583 1 0 0 # ob  
526 4 4 -1.050000 -11.335294487 1.680900680 10.366131378 1 0 0 # ob  
527 4 4 -1.050000 -15.376589092 6.314939700 12.565579711 1 0 0 # ob  
528 4 4 -1.050000 -11.960435345 6.132051481 8.299077932 1 0 0 # ob  
529 4 4 -1.050000 -13.094932736 1.850546126 6.100653738 1 0 0 # ob  
530 4 8 2.100000 -11.307102986 1.527119204 11.995277170 1 0 0 # st  
531 4 8 2.100000 -11.988072226 5.973370782 6.670701903 1 0 0 # st  
532 4 8 2.100000 -14.576397014 7.381980796 6.669722830 1 0 0 # st  
533 4 8 2.100000 -11.988047014 2.927430796 6.669722830 1 0 0 # st  
534 4 8 2.100000 -11.307077774 7.390279218 11.994298097 1 0 0 # st  
535 4 8 2.100000 -13.895427774 2.935729218 11.994298097 1 0 0 # st  
536 4 8 2.100000 -13.895452986 5.981669204 11.995277170 1 0 0 # st  
537 4 8 2.100000 -14.576422226 1.518820782 6.670701903 1 0 0 # st  
538 4 1 1.575000 -12.941544971 10.383761568 9.332770632 1 0 0 # ao  
539 4 1 1.575000 -15.529894971 14.838311568 9.332770632 1 0 0 # ao  
540 4 1 1.575000 -12.941955029 16.343538432 9.332229368 1 0 0 # ao  
541 4 1 1.575000 -10.353605029 11.888988432 9.332229368 1 0 0 # ao  
542 4 2 0.425000 -11.795449128 13.366367322 10.818615063 1 0 0 # ho  
543 4 2 0.425000 -14.383799128 8.911817322 10.818615063 1 0 0 # ho  
544 4 2 0.425000 -14.088050872 13.360932678 7.846384937 1 0 0 # ho  
545 4 2 0.425000 -11.499700872 17.815482678 7.846384937 1 0 0 # ho  
546 4 4 -1.050000 -14.548785345 10.586601481 8.299077932 1 0 0 # ob  
547 4 4 -1.050000 -10.506582736 15.214196126 6.100653738 1 0 0 # ob  
548 4 4 -1.050000 -11.959855513 11.682749320 8.298868622 1 0 0 # ob  
549 4 4 -1.050000 -13.095260908 15.957810300 6.099420289 1 0 0 # ob  
550 4 4 -1.050000 -14.548205513 16.137299320 8.298868622 1 0 0 # ob

|     |   |   |           |               |               |              |   |   |   |   |     |
|-----|---|---|-----------|---------------|---------------|--------------|---|---|---|---|-----|
| 551 | 4 | 4 | -1.050000 | -13.923644487 | 15.044550680  | 10.366131378 | 1 | 0 | 0 | # | ob  |
| 552 | 4 | 4 | -1.050000 | -10.506910908 | 11.503260300  | 6.099420289  | 1 | 0 | 0 | # | ob  |
| 553 | 4 | 4 | -1.050000 | -13.923064655 | 11.686148519  | 10.365922068 | 1 | 0 | 0 | # | ob  |
| 554 | 4 | 4 | -1.050000 | -12.788567264 | 15.967653874  | 12.564346262 | 1 | 0 | 0 | # | ob  |
| 555 | 4 | 4 | -1.050000 | -11.334714655 | 16.140698519  | 10.365922068 | 1 | 0 | 0 | # | ob  |
| 556 | 4 | 4 | -1.050000 | -15.376917264 | 11.513103874  | 12.564346262 | 1 | 0 | 0 | # | ob  |
| 557 | 4 | 4 | -1.050000 | -12.788239092 | 10.769489700  | 12.565579711 | 1 | 0 | 0 | # | ob  |
| 558 | 4 | 7 | -0.950000 | -13.530842343 | 8.910040996   | 10.345082885 | 1 | 0 | 0 | # | oh  |
| 559 | 4 | 4 | -1.050000 | -10.863018349 | 8.913076970   | 12.393982417 | 1 | 0 | 0 | # | ob  |
| 560 | 4 | 7 | -0.950000 | -10.942492343 | 13.364590996  | 10.345082885 | 1 | 0 | 0 | # | oh  |
| 561 | 4 | 4 | -1.050000 | -13.451368349 | 13.367626970  | 12.393982417 | 1 | 0 | 0 | # | ob  |
| 562 | 4 | 7 | -0.950000 | -12.352657657 | 17.817259004  | 8.319917115  | 1 | 0 | 0 | # | oh  |
| 563 | 4 | 4 | -1.050000 | -15.020481651 | 17.814223030  | 6.271017583  | 1 | 0 | 0 | # | ob  |
| 564 | 4 | 7 | -0.950000 | -14.941007657 | 13.362709004  | 8.319917115  | 1 | 0 | 0 | # | oh  |
| 565 | 4 | 4 | -1.050000 | -12.432131651 | 13.359673030  | 6.271017583  | 1 | 0 | 0 | # | ob  |
| 566 | 4 | 4 | -1.050000 | -11.335294487 | 10.590000680  | 10.366131378 | 1 | 0 | 0 | # | ob  |
| 567 | 4 | 4 | -1.050000 | -15.376589092 | 15.224039700  | 12.565579711 | 1 | 0 | 0 | # | ob  |
| 568 | 4 | 4 | -1.050000 | -11.960435345 | 15.041151481  | 8.299077932  | 1 | 0 | 0 | # | ob  |
| 569 | 4 | 4 | -1.050000 | -13.094932736 | 10.759646126  | 6.100653738  | 1 | 0 | 0 | # | ob  |
| 570 | 4 | 8 | 2.100000  | -11.307102986 | 10.436219204  | 11.995277170 | 1 | 0 | 0 | # | st  |
| 571 | 4 | 8 | 2.100000  | -11.988072226 | 14.882470782  | 6.670701903  | 1 | 0 | 0 | # | st  |
| 572 | 4 | 8 | 2.100000  | -14.576397014 | 16.291080796  | 6.669722830  | 1 | 0 | 0 | # | st  |
| 573 | 4 | 8 | 2.100000  | -11.988047014 | 11.836530796  | 6.669722830  | 1 | 0 | 0 | # | st  |
| 574 | 4 | 8 | 2.100000  | -11.307077774 | 16.299379218  | 11.994298097 | 1 | 0 | 0 | # | st  |
| 575 | 4 | 8 | 2.100000  | -13.895427774 | 11.844829218  | 11.994298097 | 1 | 0 | 0 | # | st  |
| 576 | 4 | 8 | 2.100000  | -13.895452986 | 14.890769204  | 11.995277170 | 1 | 0 | 0 | # | st  |
| 577 | 4 | 8 | 2.100000  | -14.576422226 | 10.427920782  | 6.670701903  | 1 | 0 | 0 | # | st  |
| 578 | 4 | 1 | 1.575000  | -12.941544971 | 19.292861568  | 9.332770632  | 1 | 0 | 0 | # | ao  |
| 579 | 4 | 1 | 1.575000  | -15.529849471 | 23.747411568  | 9.332770632  | 1 | 0 | 0 | # | ao  |
| 580 | 4 | 1 | 1.575000  | -12.941955029 | 25.252638432  | 9.332229368  | 1 | 0 | 0 | # | ao  |
| 581 | 4 | 1 | 1.575000  | -10.353605029 | 20.798088432  | 9.332229368  | 1 | 0 | 0 | # | ao  |
| 582 | 4 | 2 | 0.425000  | -11.795449128 | 22.275467322  | 10.818615063 | 1 | 0 | 0 | # | ho  |
| 583 | 4 | 2 | 0.425000  | -14.383799128 | 17.820917322  | 10.818615063 | 1 | 0 | 0 | # | ho  |
| 584 | 4 | 2 | 0.425000  | -14.088050872 | 22.270032678  | 7.846384937  | 1 | 0 | 0 | # | ho  |
| 585 | 4 | 2 | 0.425000  | -11.499700872 | 26.724582678  | 7.846384937  | 1 | 0 | 0 | # | ho  |
| 586 | 4 | 4 | -1.050000 | -14.548785345 | 19.495701481  | 8.299077932  | 1 | 0 | 0 | # | ob  |
| 587 | 4 | 4 | -1.050000 | -10.506582736 | 24.123296126  | 6.100653738  | 1 | 0 | 0 | # | ob  |
| 588 | 4 | 4 | -1.050000 | -11.959855513 | 20.591849320  | 8.298868622  | 1 | 0 | 0 | # | ob  |
| 589 | 4 | 4 | -1.050000 | -13.095260908 | 24.866910300  | 6.099420289  | 1 | 0 | 0 | # | ob  |
| 590 | 4 | 4 | -1.050000 | -14.548205513 | 25.046399320  | 8.298868622  | 1 | 0 | 0 | # | ob  |
| 591 | 4 | 4 | -1.050000 | -13.923644487 | 23.953650680  | 10.366131378 | 1 | 0 | 0 | # | ob  |
| 592 | 4 | 4 | -1.050000 | -10.506910908 | 20.412360300  | 6.099420289  | 1 | 0 | 0 | # | ob  |
| 593 | 4 | 4 | -1.050000 | -13.923064655 | 20.595248519  | 10.365922068 | 1 | 0 | 0 | # | ob  |
| 594 | 4 | 4 | -1.050000 | -12.788567264 | 24.876753874  | 12.564346262 | 1 | 0 | 0 | # | ob  |
| 595 | 4 | 4 | -1.050000 | -11.334714655 | 25.049798519  | 10.365922068 | 1 | 0 | 0 | # | ob  |
| 596 | 4 | 4 | -1.050000 | -15.376917264 | 20.422203874  | 12.564346262 | 1 | 0 | 0 | # | ob  |
| 597 | 4 | 4 | -1.050000 | -12.788239092 | 19.678589700  | 12.565579711 | 1 | 0 | 0 | # | ob  |
| 598 | 4 | 7 | -0.950000 | -13.530842343 | 17.819140996  | 10.345082885 | 1 | 0 | 0 | # | oh  |
| 599 | 4 | 4 | -1.050000 | -10.863018349 | 17.822176970  | 12.393982417 | 1 | 0 | 0 | # | ob  |
| 600 | 4 | 7 | -0.950000 | -10.942492343 | 22.273690996  | 10.345082885 | 1 | 0 | 0 | # | oh  |
| 601 | 4 | 4 | -1.050000 | -13.451368349 | 22.276726970  | 12.393982417 | 1 | 0 | 0 | # | ob  |
| 602 | 4 | 7 | -0.950000 | -12.352657657 | 26.726359004  | 8.319917115  | 1 | 0 | 0 | # | oh  |
| 603 | 4 | 4 | -1.050000 | -15.020481651 | 26.723323030  | 6.271017583  | 1 | 0 | 0 | # | ob  |
| 604 | 4 | 7 | -0.950000 | -14.941007657 | 22.271809004  | 8.319917115  | 1 | 0 | 0 | # | oh  |
| 605 | 4 | 4 | -1.050000 | -12.432131651 | 22.268773030  | 6.271017583  | 1 | 0 | 0 | # | ob  |
| 606 | 4 | 4 | -1.050000 | -11.335294487 | 19.499100680  | 10.366131378 | 1 | 0 | 0 | # | ob  |
| 607 | 4 | 4 | -1.050000 | -15.376589092 | 24.133139700  | 12.565579711 | 1 | 0 | 0 | # | ob  |
| 608 | 4 | 4 | -1.050000 | -11.960435345 | 23.950251481  | 8.299077932  | 1 | 0 | 0 | # | ob  |
| 609 | 4 | 4 | -1.050000 | -13.094932736 | 19.668746126  | 6.100653738  | 1 | 0 | 0 | # | ob  |
| 610 | 4 | 8 | 2.100000  | -11.307102986 | 19.345319204  | 11.995277170 | 1 | 0 | 0 | # | st  |
| 611 | 4 | 8 | 2.100000  | -11.988072226 | 23.791570782  | 6.670701903  | 1 | 0 | 0 | # | st  |
| 612 | 4 | 8 | 2.100000  | -14.576397014 | 25.200180796  | 6.669722830  | 1 | 0 | 0 | # | st  |
| 613 | 4 | 8 | 2.100000  | -11.988047014 | 20.745630796  | 6.669722830  | 1 | 0 | 0 | # | st  |
| 614 | 4 | 8 | 2.100000  | -11.307077774 | 25.208479218  | 11.994298097 | 1 | 0 | 0 | # | st  |
| 615 | 4 | 8 | 2.100000  | -13.895427774 | 20.753929218  | 11.994298097 | 1 | 0 | 0 | # | st  |
| 616 | 4 | 8 | 2.100000  | -13.895452986 | 23.799869204  | 11.995277170 | 1 | 0 | 0 | # | st  |
| 617 | 4 | 8 | 2.100000  | -14.576422226 | 19.337020782  | 6.670701903  | 1 | 0 | 0 | # | st  |
| 618 | 4 | 1 | 1.575000  | -12.941544971 | -27.434438432 | 9.332770632  | 1 | 1 | 0 | # | ao  |
| 619 | 4 | 1 | 1.575000  | -15.529849471 | -22.979888432 | 9.332770632  | 1 | 1 | 0 | # | ao  |
| 620 | 4 | 1 | 1.575000  | -12.941955029 | -21.474661568 | 9.332229368  | 1 | 1 | 0 | # | ao  |
| 621 | 4 | 1 | 1.575000  | -10.353605029 | -25.929211568 | 9.332229368  | 1 | 1 | 0 | # | ao  |
| 622 | 4 | 2 | 0.425000  | -11.795449128 | -24.451832678 | 10.818615063 | 1 | 1 | 0 | # | ho  |
| 623 | 4 | 2 | 0.425000  | -14.383799128 | 26.730017322  | 10.818615063 | 1 | 0 | 0 | # | ho  |
| 624 | 4 | 2 | 0.425000  | -14.088050872 | -24.457267322 | 7.846384937  | 1 | 1 | 0 | # | ho  |
| 625 | 4 | 3 | 0.425000  | -11.499700872 | -20.002717322 | 7.846384937  | 1 | 1 | 0 | # | do  |
| 626 | 4 | 4 | -1.050000 | -14.548785345 | -27.231598519 | 8.299077932  | 1 | 1 | 0 | # | ob  |
| 627 | 4 | 4 | -1.050000 | -10.506582736 | -22.604003874 | 6.100653738  | 1 | 1 | 0 | # | ob  |
| 628 | 4 | 4 | -1.050000 | -11.959855513 | -26.135450680 | 8.298868622  | 1 | 1 | 0 | # | ob  |
| 629 | 4 | 4 | -1.050000 | -13.095260908 | -21.860389700 | 6.099420289  | 1 | 1 | 0 | # | ob  |
| 630 | 4 | 4 | -1.050000 | -14.548205513 | -21.680900680 | 8.298868622  | 1 | 1 | 0 | # | ob  |
| 631 | 4 | 4 | -1.050000 | -13.923644487 | -22.773649320 | 10.366131378 | 1 | 1 | 0 | # | ob  |
| 632 | 4 | 4 | -1.050000 | -10.506910908 | -26.314939700 | 6.099420289  | 1 | 1 | 0 | # | ob  |
| 633 | 4 | 4 | -1.050000 | -13.923064655 | -26.132051481 | 10.365922068 | 1 | 1 | 0 | # | ob  |
| 634 | 4 | 4 | -1.050000 | -12.788567264 | -21.850546126 | 12.564346262 | 1 | 1 | 0 | # | ob  |
| 635 | 4 | 4 | -1.050000 | -11.334714655 | -21.677501481 | 10.365922068 | 1 | 1 | 0 | # | ob  |
| 636 | 4 | 4 | -1.050000 | -15.376917264 | -26.305096126 | 12.564346262 | 1 | 1 | 0 | # | ob  |
| 637 | 4 | 4 | -1.050000 | -12.788239092 | -27.048710300 | 12.565579711 | 1 | 1 | 0 | # | ob  |
| 638 | 4 | 7 | -0.950000 | -13.530842343 | 26.728240996  | 10.345082885 | 1 | 0 | 0 | # | oh  |
| 639 | 4 | 4 | -1.050000 | -10.863018349 | 26.731276970  | 12.393982417 | 1 | 0 | 0 | # | ob  |
| 640 | 4 | 7 | -0.950000 | -10.942492343 | -24.453609004 | 10.345082885 | 1 | 1 | 0 | # | oh  |
| 641 | 4 | 4 | -1.050000 | -13.451368349 | -24.450573030 | 12.393982417 | 1 | 1 | 0 | # | ob  |
| 642 | 4 | 5 | -0.950000 | -12.352657657 | -20.000940996 | 8.319917115  | 1 | 1 | 0 | # | oho |
| 643 | 4 | 6 | -0.950000 | -15.020481651 | -20.003976970 | 6.271017583  | 1 | 1 | 0 | # | oht |



|     |   |   |           |               |               |                |   |   |   |   |     |
|-----|---|---|-----------|---------------|---------------|----------------|---|---|---|---|-----|
| 644 | 4 | 7 | -0.950000 | -14.941007657 | -24.455490996 | 8.319917115    | 1 | 1 | 0 | # | oh  |
| 645 | 4 | 4 | -1.050000 | -12.432131651 | -24.458526970 | 6.271017583    | 1 | 1 | 0 | # | ob  |
| 646 | 4 | 4 | -1.050000 | -11.335294487 | -27.228199320 | 10.366131378   | 1 | 1 | 0 | # | ob  |
| 647 | 4 | 4 | -1.050000 | -15.376589092 | -22.594160300 | 12.565579711   | 1 | 1 | 0 | # | ob  |
| 648 | 4 | 4 | -1.050000 | -11.960435345 | -22.777048519 | 8.299077932    | 1 | 1 | 0 | # | ob  |
| 649 | 4 | 4 | -1.050000 | -13.094932736 | -27.058553874 | 6.100653738    | 1 | 1 | 0 | # | ob  |
| 650 | 4 | 8 | 2.100000  | -11.307102986 | -27.381980796 | 11.995277170   | 1 | 1 | 0 | # | st  |
| 651 | 4 | 8 | 2.100000  | -11.988072226 | -22.935729218 | 6.670701903    | 1 | 1 | 0 | # | st  |
| 652 | 4 | 8 | 2.100000  | -14.576397014 | -21.527119204 | 6.669722830    | 1 | 1 | 0 | # | st  |
| 653 | 4 | 8 | 2.100000  | -11.988047014 | -25.981669204 | 6.669722830    | 1 | 1 | 0 | # | st  |
| 654 | 4 | 8 | 2.100000  | -11.307077774 | -21.518820782 | 11.994298097   | 1 | 1 | 0 | # | st  |
| 655 | 4 | 8 | 2.100000  | -13.895427774 | -25.973370782 | 11.994298097   | 1 | 1 | 0 | # | st  |
| 656 | 4 | 8 | 2.100000  | -13.895452986 | -22.927430796 | 11.995277170   | 1 | 1 | 0 | # | st  |
| 657 | 4 | 8 | 2.100000  | -14.576422226 | -27.390279218 | 6.670701903    | 1 | 1 | 0 | # | st  |
| 658 | 4 | 6 | -0.950000 | -10.792633573 | -19.680858114 | -16.076279050  | 1 | 1 | 1 | # | oht |
| 659 | 4 | 6 | -0.950000 | -15.225161797 | -0.272172439  | 15.863272887   | 1 | 0 | 0 | # | oht |
| 660 | 4 | 3 | 0.425000  | 15.486672253  | -1.308055357  | 15.669139507   | 0 | 0 | 0 | # | do  |
| 661 | 4 | 3 | 0.425000  | -10.530111381 | -1.054326608  | -15.5697929463 | 1 | 0 | 1 | # | do  |
| 662 | 4 | 3 | 0.425000  | -10.666251036 | -18.596754758 | -16.278386456  | 1 | 1 | 1 | # | do  |
| 663 | 4 | 3 | 0.425000  | -15.417051085 | -19.012312375 | 15.301136949   | 1 | 1 | 0 | # | do  |
| 664 | 5 | 1 | 1.575000  | -7.764844971  | 1.474661568   | 9.332770632    | 1 | 0 | 0 | # | ao  |
| 665 | 5 | 1 | 1.575000  | -10.353194971 | 5.929211568   | 9.332770632    | 1 | 0 | 0 | # | ao  |
| 666 | 5 | 1 | 1.575000  | -7.765255029  | 7.434438432   | 9.332229368    | 1 | 0 | 0 | # | ao  |
| 667 | 5 | 1 | 1.575000  | -5.176905029  | 2.979888432   | 9.332229368    | 1 | 0 | 0 | # | ao  |
| 668 | 5 | 2 | 0.425000  | -6.818749128  | 4.457267322   | 10.818615063   | 1 | 0 | 0 | # | ho  |
| 669 | 5 | 3 | 0.425000  | -9.207099128  | 0.002717322   | 10.818615063   | 1 | 0 | 0 | # | do  |
| 670 | 5 | 2 | 0.425000  | -8.911350872  | 4.451832678   | 7.846384937    | 1 | 0 | 0 | # | ho  |
| 671 | 5 | 2 | 0.425000  | -6.323000872  | 8.906382678   | 7.846384937    | 1 | 0 | 0 | # | ho  |
| 672 | 5 | 4 | -1.050000 | -9.372085345  | 1.677501481   | 8.299077932    | 1 | 0 | 0 | # | ob  |
| 673 | 5 | 4 | -1.050000 | -5.329882736  | 6.305096126   | 6.100653738    | 1 | 0 | 0 | # | ob  |
| 674 | 5 | 4 | -1.050000 | -6.783155513  | 2.773649320   | 8.298868622    | 1 | 0 | 0 | # | ob  |
| 675 | 5 | 4 | -1.050000 | -7.918569088  | 7.048710300   | 6.099420289    | 1 | 0 | 0 | # | ob  |
| 676 | 5 | 4 | -1.050000 | -9.371505513  | 7.228199320   | 8.298868622    | 1 | 0 | 0 | # | ob  |
| 677 | 5 | 4 | -1.050000 | -8.746944487  | 6.135450680   | 10.366131378   | 1 | 0 | 0 | # | ob  |
| 678 | 5 | 4 | -1.050000 | -5.330210908  | 2.594160300   | 6.099420289    | 1 | 0 | 0 | # | ob  |
| 679 | 5 | 4 | -1.050000 | -8.746364655  | 2.777048519   | 10.365922068   | 1 | 0 | 0 | # | ob  |
| 680 | 5 | 4 | -1.050000 | -7.611867264  | 7.058553874   | 12.564346262   | 1 | 0 | 0 | # | ob  |
| 681 | 5 | 4 | -1.050000 | -6.158014655  | 7.231598519   | 10.365922068   | 1 | 0 | 0 | # | ob  |
| 682 | 5 | 4 | -1.050000 | -10.200217264 | 2.604003874   | 12.564346262   | 1 | 0 | 0 | # | ob  |
| 683 | 5 | 4 | -1.050000 | -7.611539092  | 1.860389700   | 12.565579711   | 1 | 0 | 0 | # | ob  |
| 684 | 5 | 5 | -0.950000 | -8.354142343  | 0.000940996   | 10.345082885   | 1 | 0 | 0 | # | oho |
| 685 | 5 | 6 | -0.950000 | -5.686318349  | 0.003976970   | 12.393982417   | 1 | 0 | 0 | # | oht |
| 686 | 5 | 7 | -0.950000 | -5.765792343  | 4.455490996   | 10.345082885   | 1 | 0 | 0 | # | oh  |
| 687 | 5 | 4 | -1.050000 | -8.274668349  | 4.458526970   | 12.393982417   | 1 | 0 | 0 | # | ob  |
| 688 | 5 | 7 | -0.950000 | -7.175957657  | 8.908159004   | 8.319917115    | 1 | 0 | 0 | # | oh  |
| 689 | 5 | 4 | -1.050000 | -9.843781651  | 8.905123030   | 6.271017583    | 1 | 0 | 0 | # | ob  |
| 690 | 5 | 7 | -0.950000 | -9.764307657  | 4.453609004   | 8.319917115    | 1 | 0 | 0 | # | oh  |
| 691 | 5 | 4 | -1.050000 | -7.255431651  | 4.450573030   | 6.271017583    | 1 | 0 | 0 | # | ob  |
| 692 | 5 | 4 | -1.050000 | -6.158594487  | 1.680900680   | 10.366131378   | 1 | 0 | 0 | # | ob  |
| 693 | 5 | 4 | -1.050000 | -10.199889092 | 6.314939700   | 12.565579711   | 1 | 0 | 0 | # | ob  |
| 694 | 5 | 4 | -1.050000 | -6.783735345  | 6.132051481   | 8.299077932    | 1 | 0 | 0 | # | ob  |
| 695 | 5 | 4 | -1.050000 | -7.918232736  | 1.850546126   | 6.100653738    | 1 | 0 | 0 | # | ob  |
| 696 | 5 | 8 | 2.100000  | -6.130402986  | 1.527119204   | 11.995277170   | 1 | 0 | 0 | # | st  |
| 697 | 5 | 8 | 2.100000  | -6.811372226  | 5.973370782   | 6.670701903    | 1 | 0 | 0 | # | st  |
| 698 | 5 | 8 | 2.100000  | -9.399697014  | 7.381980796   | 6.669722830    | 1 | 0 | 0 | # | st  |
| 699 | 5 | 8 | 2.100000  | -6.811347014  | 2.927430796   | 6.669722830    | 1 | 0 | 0 | # | st  |
| 700 | 5 | 8 | 2.100000  | -6.130377774  | 7.390279218   | 11.994298097   | 1 | 0 | 0 | # | st  |
| 701 | 5 | 8 | 2.100000  | -8.718727774  | 2.935729218   | 11.994298097   | 1 | 0 | 0 | # | st  |
| 702 | 5 | 8 | 2.100000  | -8.718752986  | 5.981669204   | 11.995277170   | 1 | 0 | 0 | # | st  |
| 703 | 5 | 8 | 2.100000  | -9.399722226  | 1.518820782   | 6.670701903    | 1 | 0 | 0 | # | st  |
| 704 | 5 | 1 | 1.575000  | -7.764844971  | 10.383761568  | 9.332770632    | 1 | 0 | 0 | # | ao  |
| 705 | 5 | 1 | 1.575000  | -10.353194971 | 14.838311568  | 9.332770632    | 1 | 0 | 0 | # | ao  |
| 706 | 5 | 1 | 1.575000  | -7.765255029  | 16.343538432  | 9.332229368    | 1 | 0 | 0 | # | ao  |
| 707 | 5 | 1 | 1.575000  | -5.176905029  | 11.888988432  | 9.332229368    | 1 | 0 | 0 | # | ao  |
| 708 | 5 | 2 | 0.425000  | -6.818749128  | 13.366367322  | 10.818615063   | 1 | 0 | 0 | # | ho  |
| 709 | 5 | 2 | 0.425000  | -9.207099128  | 8.911817322   | 10.818615063   | 1 | 0 | 0 | # | ho  |
| 710 | 5 | 2 | 0.425000  | -8.911350872  | 13.360932678  | 7.846384937    | 1 | 0 | 0 | # | ho  |
| 711 | 5 | 2 | 0.425000  | -6.323000872  | 17.815482678  | 7.846384937    | 1 | 0 | 0 | # | ho  |
| 712 | 5 | 4 | -1.050000 | -9.372085345  | 10.586601481  | 8.299077932    | 1 | 0 | 0 | # | ob  |
| 713 | 5 | 4 | -1.050000 | -5.329882736  | 15.214196126  | 6.100653738    | 1 | 0 | 0 | # | ob  |
| 714 | 5 | 4 | -1.050000 | -6.783155513  | 11.682749320  | 8.298868622    | 1 | 0 | 0 | # | ob  |
| 715 | 5 | 4 | -1.050000 | -7.918569088  | 15.957810300  | 6.099420289    | 1 | 0 | 0 | # | ob  |
| 716 | 5 | 4 | -1.050000 | -9.371505513  | 16.137299320  | 8.298868622    | 1 | 0 | 0 | # | ob  |
| 717 | 5 | 4 | -1.050000 | -8.746944487  | 15.044550680  | 10.366131378   | 1 | 0 | 0 | # | ob  |
| 718 | 5 | 4 | -1.050000 | -5.330210908  | 11.503260300  | 6.099420289    | 1 | 0 | 0 | # | ob  |
| 719 | 5 | 4 | -1.050000 | -8.746364655  | 11.686148519  | 10.365922068   | 1 | 0 | 0 | # | ob  |
| 720 | 5 | 4 | -1.050000 | -7.611867264  | 15.967653874  | 12.564346262   | 1 | 0 | 0 | # | ob  |
| 721 | 5 | 4 | -1.050000 | -6.158014655  | 16.140698519  | 10.365922068   | 1 | 0 | 0 | # | ob  |
| 722 | 5 | 4 | -1.050000 | -10.200217264 | 11.513103874  | 12.564346262   | 1 | 0 | 0 | # | ob  |
| 723 | 5 | 4 | -1.050000 | -7.611539092  | 10.769489700  | 12.565579711   | 1 | 0 | 0 | # | ob  |
| 724 | 5 | 7 | -0.950000 | -8.354142343  | 8.910040996   | 10.345082885   | 1 | 0 | 0 | # | oh  |
| 725 | 5 | 4 | -1.050000 | -5.686318349  | 8.913076970   | 12.393982417   | 1 | 0 | 0 | # | ob  |
| 726 | 5 | 7 | -0.950000 | -5.765792343  | 13.364590996  | 10.345082885   | 1 | 0 | 0 | # | oh  |
| 727 | 5 | 4 | -1.050000 | -8.274668349  | 13.367626970  | 12.393982417   | 1 | 0 | 0 | # | ob  |
| 728 | 5 | 7 | -0.950000 | -7.175957657  | 17.817259004  | 8.319917115    | 1 | 0 | 0 | # | oh  |
| 729 | 5 | 4 | -1.050000 | -9.843781651  | 17.814223030  | 6.271017583    | 1 | 0 | 0 | # | ob  |
| 730 | 5 | 7 | -0.950000 | -9.764307657  | 13.362709004  | 8.319917115    | 1 | 0 | 0 | # | oh  |
| 731 | 5 | 4 | -1.050000 | -7.255431651  | 13.359673030  | 6.271017583    | 1 | 0 | 0 | # | ob  |
| 732 | 5 | 4 | -1.050000 | -6.158594487  | 10.590000680  | 10.366131378   | 1 | 0 | 0 | # | ob  |
| 733 | 5 | 4 | -1.050000 | -10.199889092 | 15.224039700  | 12.565579711   | 1 | 0 | 0 | # | ob  |
| 734 | 5 | 4 | -1.050000 | -6.783735345  | 15.041151481  | 8.299077932    | 1 | 0 | 0 | # | ob  |
| 735 | 5 | 4 | -1.050000 | -7.918232736  | 10.759646126  | 6.100653738    | 1 | 0 | 0 | # | ob  |
| 736 | 5 | 8 | 2.100000  | -6.130402986  | 10.436219204  | 11.995277170   | 1 | 0 | 0 | # | st  |

|     |   |   |           |               |               |               |   |   |   |   |     |
|-----|---|---|-----------|---------------|---------------|---------------|---|---|---|---|-----|
| 737 | 5 | 8 | 2.100000  | -6.811372226  | 14.882470782  | 6.670701903   | 1 | 0 | 0 | # | st  |
| 738 | 5 | 8 | 2.100000  | -9.399697014  | 16.291080796  | 6.669722830   | 1 | 0 | 0 | # | st  |
| 739 | 5 | 8 | 2.100000  | -6.811347014  | 11.836530796  | 6.669722830   | 1 | 0 | 0 | # | st  |
| 740 | 5 | 8 | 2.100000  | -6.130377774  | 16.299379218  | 11.994298097  | 1 | 0 | 0 | # | st  |
| 741 | 5 | 8 | 2.100000  | -8.718727774  | 11.844829218  | 11.994298097  | 1 | 0 | 0 | # | st  |
| 742 | 5 | 8 | 2.100000  | -8.718752986  | 14.890769204  | 11.995277170  | 1 | 0 | 0 | # | st  |
| 743 | 5 | 8 | 2.100000  | -9.399722226  | 10.427920782  | 6.670701903   | 1 | 0 | 0 | # | st  |
| 744 | 5 | 1 | 1.575000  | -7.764844971  | 19.292861568  | 9.332770632   | 1 | 0 | 0 | # | ao  |
| 745 | 5 | 1 | 1.575000  | -10.353194971 | 23.747411568  | 9.332770632   | 1 | 0 | 0 | # | ao  |
| 746 | 5 | 1 | 1.575000  | -7.765255029  | 25.252638432  | 9.332229368   | 1 | 0 | 0 | # | ao  |
| 747 | 5 | 1 | 1.575000  | -5.176905029  | 20.798088432  | 9.332229368   | 1 | 0 | 0 | # | ao  |
| 748 | 5 | 2 | 0.425000  | -6.618749128  | 22.275467322  | 10.818615063  | 1 | 0 | 0 | # | ho  |
| 749 | 5 | 2 | 0.425000  | -9.207099128  | 17.820917322  | 10.818615063  | 1 | 0 | 0 | # | ho  |
| 750 | 5 | 2 | 0.425000  | -8.911350872  | 22.270032678  | 7.846384937   | 1 | 0 | 0 | # | ho  |
| 751 | 5 | 2 | 0.425000  | -6.323000872  | 26.724582678  | 7.846384937   | 1 | 0 | 0 | # | ho  |
| 752 | 5 | 4 | -1.050000 | -9.372085345  | 19.495701481  | 8.299077932   | 1 | 0 | 0 | # | ob  |
| 753 | 5 | 4 | -1.050000 | -5.329882736  | 24.123296126  | 6.100653738   | 1 | 0 | 0 | # | ob  |
| 754 | 5 | 4 | -1.050000 | -6.783155513  | 20.591849320  | 8.298868622   | 1 | 0 | 0 | # | ob  |
| 755 | 5 | 4 | -1.050000 | -7.918560908  | 24.866910300  | 6.099420289   | 1 | 0 | 0 | # | ob  |
| 756 | 5 | 4 | -1.050000 | -9.371505513  | 25.046399320  | 8.298868622   | 1 | 0 | 0 | # | ob  |
| 757 | 5 | 4 | -1.050000 | -8.746944487  | 23.953650680  | 10.366131378  | 1 | 0 | 0 | # | ob  |
| 758 | 5 | 4 | -1.050000 | -5.330210908  | 20.412360300  | 6.099420289   | 1 | 0 | 0 | # | ob  |
| 759 | 5 | 4 | -1.050000 | -8.746364655  | 20.595248519  | 10.365922068  | 1 | 0 | 0 | # | ob  |
| 760 | 5 | 4 | -1.050000 | -7.611867264  | 24.876753874  | 12.564346262  | 1 | 0 | 0 | # | ob  |
| 761 | 5 | 4 | -1.050000 | -6.158014655  | 25.049798519  | 10.365922068  | 1 | 0 | 0 | # | ob  |
| 762 | 5 | 4 | -1.050000 | -10.200217264 | 20.422203874  | 12.564346262  | 1 | 0 | 0 | # | ob  |
| 763 | 5 | 4 | -1.050000 | -7.611539092  | 19.678589700  | 12.565579711  | 1 | 0 | 0 | # | ob  |
| 764 | 5 | 7 | -0.950000 | -8.354142343  | 17.819140996  | 10.345082885  | 1 | 0 | 0 | # | oh  |
| 765 | 5 | 4 | -1.050000 | -5.686318349  | 17.822176970  | 12.393982417  | 1 | 0 | 0 | # | ob  |
| 766 | 5 | 7 | -0.950000 | -5.765792343  | 22.273690996  | 10.345082885  | 1 | 0 | 0 | # | oh  |
| 767 | 5 | 4 | -1.050000 | -8.274668349  | 22.276726970  | 12.393982417  | 1 | 0 | 0 | # | ob  |
| 768 | 5 | 7 | -0.950000 | -7.175957657  | 26.726359004  | 8.319917115   | 1 | 0 | 0 | # | oh  |
| 769 | 5 | 4 | -1.050000 | -9.843781651  | 26.723323030  | 6.271017583   | 1 | 0 | 0 | # | ob  |
| 770 | 5 | 7 | -0.950000 | -9.764307657  | 22.271809004  | 8.319917115   | 1 | 0 | 0 | # | oh  |
| 771 | 5 | 4 | -1.050000 | -7.255431651  | 22.268773030  | 6.271017583   | 1 | 0 | 0 | # | ob  |
| 772 | 5 | 4 | -1.050000 | -6.158594487  | 19.499100680  | 10.366131378  | 1 | 0 | 0 | # | ob  |
| 773 | 5 | 4 | -1.050000 | -10.199889092 | 24.133139700  | 12.565579711  | 1 | 0 | 0 | # | ob  |
| 774 | 5 | 4 | -1.050000 | -6.783735345  | 23.950251481  | 8.299077932   | 1 | 0 | 0 | # | ob  |
| 775 | 5 | 4 | -1.050000 | -7.918232736  | 19.668746126  | 6.100653738   | 1 | 0 | 0 | # | ob  |
| 776 | 5 | 8 | 2.100000  | -6.130402986  | 19.345319204  | 11.995277170  | 1 | 0 | 0 | # | st  |
| 777 | 5 | 8 | 2.100000  | -6.811372226  | 23.791570782  | 6.670701903   | 1 | 0 | 0 | # | st  |
| 778 | 5 | 8 | 2.100000  | -9.399697014  | 25.200180796  | 6.669722830   | 1 | 0 | 0 | # | st  |
| 779 | 5 | 8 | 2.100000  | -6.811347014  | 20.745630796  | 6.669722830   | 1 | 0 | 0 | # | st  |
| 780 | 5 | 8 | 2.100000  | -6.130377774  | 25.208479218  | 11.994298097  | 1 | 0 | 0 | # | st  |
| 781 | 5 | 8 | 2.100000  | -8.718727774  | 20.753929218  | 11.994298097  | 1 | 0 | 0 | # | st  |
| 782 | 5 | 8 | 2.100000  | -8.718752986  | 23.799869204  | 11.995277170  | 1 | 0 | 0 | # | st  |
| 783 | 5 | 8 | 2.100000  | -9.399722226  | 19.337020782  | 6.670701903   | 1 | 0 | 0 | # | st  |
| 784 | 5 | 1 | 1.575000  | -7.764844971  | -27.434438432 | 9.332770632   | 1 | 1 | 0 | # | ao  |
| 785 | 5 | 1 | 1.575000  | -10.353194971 | -22.979888432 | 9.332770632   | 1 | 1 | 0 | # | ao  |
| 786 | 5 | 1 | 1.575000  | -7.765255029  | -21.474661568 | 9.332229368   | 1 | 1 | 0 | # | ao  |
| 787 | 5 | 1 | 1.575000  | -5.176905029  | -25.929211568 | 9.332229368   | 1 | 1 | 0 | # | ao  |
| 788 | 5 | 2 | 0.425000  | -6.618749128  | -24.451832678 | 10.818615063  | 1 | 1 | 0 | # | ho  |
| 789 | 5 | 2 | 0.425000  | -9.207099128  | 26.730017322  | 10.818615063  | 1 | 1 | 0 | # | ho  |
| 790 | 5 | 2 | 0.425000  | -8.911350872  | -24.457267322 | 7.846384937   | 1 | 1 | 0 | # | ho  |
| 791 | 5 | 3 | 0.425000  | -6.323000872  | -20.002717322 | 7.846384937   | 1 | 1 | 0 | # | do  |
| 792 | 5 | 4 | -1.050000 | -9.372085345  | -27.231598519 | 8.299077932   | 1 | 1 | 0 | # | ob  |
| 793 | 5 | 4 | -1.050000 | -5.329882736  | -22.604003874 | 6.100653738   | 1 | 1 | 0 | # | ob  |
| 794 | 5 | 4 | -1.050000 | -6.783155513  | -26.135450680 | 8.298868622   | 1 | 1 | 0 | # | ob  |
| 795 | 5 | 4 | -1.050000 | -7.918560908  | -21.860389700 | 6.099420289   | 1 | 1 | 0 | # | ob  |
| 796 | 5 | 4 | -1.050000 | -9.371505513  | -21.680900680 | 8.298868622   | 1 | 1 | 0 | # | ob  |
| 797 | 5 | 4 | -1.050000 | -8.746944487  | -22.773649320 | 10.366131378  | 1 | 1 | 0 | # | ob  |
| 798 | 5 | 4 | -1.050000 | -5.330210908  | -26.314939700 | 6.099420289   | 1 | 1 | 0 | # | ob  |
| 799 | 5 | 4 | -1.050000 | -8.746364655  | -26.132051481 | 10.365922068  | 1 | 1 | 0 | # | ob  |
| 800 | 5 | 4 | -1.050000 | -7.611867264  | -21.850546126 | 12.564346262  | 1 | 1 | 0 | # | ob  |
| 801 | 5 | 4 | -1.050000 | -6.158014655  | -21.677501481 | 10.365922068  | 1 | 1 | 0 | # | ob  |
| 802 | 5 | 4 | -1.050000 | -10.200217264 | -26.305096126 | 12.564346262  | 1 | 1 | 0 | # | ob  |
| 803 | 5 | 4 | -1.050000 | -7.611539092  | -27.048710300 | 12.565579711  | 1 | 1 | 0 | # | ob  |
| 804 | 5 | 7 | -0.950000 | -8.354142343  | 26.728240996  | 10.345082885  | 1 | 0 | 0 | # | oh  |
| 805 | 5 | 4 | -1.050000 | -5.686318349  | 26.731276970  | 12.393982417  | 1 | 0 | 0 | # | ob  |
| 806 | 5 | 7 | -0.950000 | -5.765792343  | -24.453609004 | 10.345082885  | 1 | 1 | 0 | # | oh  |
| 807 | 5 | 4 | -1.050000 | -8.274668349  | -24.450573030 | 12.393982417  | 1 | 1 | 0 | # | ob  |
| 808 | 5 | 5 | -0.950000 | -7.175957657  | -20.000940996 | 8.319917115   | 1 | 1 | 0 | # | oho |
| 809 | 5 | 6 | -0.950000 | -9.843781651  | -20.003976970 | 6.271017583   | 1 | 1 | 0 | # | oht |
| 810 | 5 | 7 | -0.950000 | -9.764307657  | -24.455490996 | 8.319917115   | 1 | 1 | 0 | # | oh  |
| 811 | 5 | 4 | -1.050000 | -7.255431651  | -24.458526970 | 6.271017583   | 1 | 1 | 0 | # | ob  |
| 812 | 5 | 4 | -1.050000 | -6.158594487  | -27.228199320 | 10.366131378  | 1 | 1 | 0 | # | ob  |
| 813 | 5 | 4 | -1.050000 | -10.199889092 | -22.594160300 | 12.565579711  | 1 | 1 | 0 | # | ob  |
| 814 | 5 | 4 | -1.050000 | -6.783735345  | -22.777048519 | 8.299077932   | 1 | 1 | 0 | # | ob  |
| 815 | 5 | 4 | -1.050000 | -7.918232736  | -27.058553874 | 6.100653738   | 1 | 1 | 0 | # | ob  |
| 816 | 5 | 8 | 2.100000  | -6.130402986  | -27.381980796 | 11.995277170  | 1 | 1 | 0 | # | st  |
| 817 | 5 | 8 | 2.100000  | -6.811372226  | -22.935729218 | 6.670701903   | 1 | 1 | 0 | # | st  |
| 818 | 5 | 8 | 2.100000  | -9.399697014  | -21.527119204 | 6.669722830   | 1 | 1 | 0 | # | st  |
| 819 | 5 | 8 | 2.100000  | -6.811347014  | -25.981669204 | 6.669722830   | 1 | 1 | 0 | # | st  |
| 820 | 5 | 8 | 2.100000  | -6.130377774  | -21.518820782 | 11.994298097  | 1 | 1 | 0 | # | st  |
| 821 | 5 | 8 | 2.100000  | -8.718727774  | -25.973370782 | 11.994298097  | 1 | 1 | 0 | # | st  |
| 822 | 5 | 8 | 2.100000  | -8.718752986  | -22.927430796 | 11.995277170  | 1 | 1 | 0 | # | st  |
| 823 | 5 | 8 | 2.100000  | -9.399722226  | -27.390279218 | 6.670701903   | 1 | 1 | 0 | # | st  |
| 824 | 5 | 6 | -0.950000 | -5.615933573  | -19.680858114 | -16.076279050 | 1 | 1 | 1 | # | oht |
| 825 | 5 | 6 | -0.950000 | -10.048461797 | -0.272172439  | 15.863272887  | 1 | 0 | 0 | # | oht |
| 826 | 5 | 3 | 0.425000  | -10.396827747 | -1.308055357  | 15.669139507  | 1 | 0 | 0 | # | do  |
| 827 | 5 | 3 | 0.425000  | -5.353411381  | -1.054326608  | -15.567929463 | 1 | 0 | 1 | # | do  |
| 828 | 5 | 3 | 0.425000  | -5.489551036  | -18.596754758 | -16.278386456 | 1 | 1 | 1 | # | do  |
| 829 | 5 | 3 | 0.425000  | -10.240351085 | -19.012312375 | 15.301136949  | 1 | 1 | 0 | # | do  |

|     |   |   |           |              |              |              |   |   |   |   |    |
|-----|---|---|-----------|--------------|--------------|--------------|---|---|---|---|----|
| 830 | 6 | 1 | 1.575000  | -2.588144971 | 1.474661568  | 9.332770632  | 1 | 0 | 0 | # | ao |
| 831 | 6 | 1 | 1.575000  | -5.176494971 | 5.929211568  | 9.332770632  | 1 | 0 | 0 | # | ao |
| 832 | 6 | 1 | 1.575000  | -2.588555029 | 7.434438432  | 9.332229368  | 1 | 0 | 0 | # | ao |
| 833 | 6 | 1 | 1.575000  | -0.000205029 | 2.979888432  | 9.332229368  | 1 | 0 | 0 | # | ao |
| 834 | 6 | 2 | 0.425000  | -1.442049128 | 4.457267322  | 10.818615063 | 1 | 0 | 0 | # | ho |
| 835 | 6 | 3 | 0.425000  | -4.030399128 | 0.002717322  | 10.818615063 | 1 | 0 | 0 | # | do |
| 836 | 6 | 2 | 0.425000  | -3.734650872 | 4.451832678  | 7.846384937  | 1 | 0 | 0 | # | ho |
| 837 | 6 | 2 | 0.425000  | -1.146300872 | 8.906382678  | 7.846384937  | 1 | 0 | 0 | # | ho |
| 838 | 6 | 4 | -1.050000 | -4.195385345 | 1.677501481  | 8.299077932  | 1 | 0 | 0 | # | ob |
| 839 | 6 | 4 | -1.050000 | -0.153182736 | 6.305096126  | 6.100653738  | 1 | 0 | 0 | # | ob |
| 840 | 6 | 4 | -1.050000 | -1.606455513 | 2.773649320  | 8.298868622  | 1 | 0 | 0 | # | ob |
| 841 | 6 | 4 | -1.050000 | -2.741860908 | 7.048710300  | 6.099420289  | 1 | 0 | 0 | # | ob |
| 842 | 6 | 4 | -1.050000 | -4.194805513 | 7.228199320  | 8.298868622  | 1 | 0 | 0 | # | ob |
| 843 | 6 | 4 | -1.050000 | -3.570244487 | 6.135450680  | 10.366131378 | 1 | 0 | 0 | # | ob |
| 844 | 6 | 4 | -1.050000 | -0.153510908 | 2.594160300  | 6.099420289  | 1 | 0 | 0 | # | ob |
| 845 | 6 | 4 | -1.050000 | -3.569664655 | 2.777048519  | 10.365922068 | 1 | 0 | 0 | # | ob |
| 846 | 6 | 4 | -1.050000 | -2.435167264 | 7.058553874  | 12.564346262 | 1 | 0 | 0 | # | ob |
| 847 | 6 | 4 | -1.050000 | -0.981314655 | 7.231598519  | 10.365922068 | 1 | 0 | 0 | # | ob |
| 848 | 6 | 4 | -1.050000 | -5.023517264 | 2.604003874  | 12.564346262 | 1 | 0 | 0 | # | ob |
| 849 | 6 | 4 | -1.050000 | -2.434839092 | 1.860389700  | 12.565579711 | 1 | 0 | 0 | # | ob |
| 850 | 6 | 5 | -0.950000 | -3.177442343 | 0.000940996  | 10.345082885 | 1 | 0 | 0 | # | oh |
| 851 | 6 | 6 | -0.950000 | -0.509618349 | 0.003976970  | 12.393982417 | 1 | 0 | 0 | # | oh |
| 852 | 6 | 7 | -0.950000 | -0.589092343 | 4.455490996  | 10.345082885 | 1 | 0 | 0 | # | oh |
| 853 | 6 | 4 | -1.050000 | -3.097968349 | 4.458526970  | 12.393982417 | 1 | 0 | 0 | # | ob |
| 854 | 6 | 7 | -0.950000 | -1.999257657 | 8.908159004  | 8.319917115  | 1 | 0 | 0 | # | oh |
| 855 | 6 | 4 | -1.050000 | -4.667081651 | 8.905123030  | 6.271017583  | 1 | 0 | 0 | # | ob |
| 856 | 6 | 7 | -0.950000 | -4.587607657 | 4.453609004  | 8.319917115  | 1 | 0 | 0 | # | oh |
| 857 | 6 | 4 | -1.050000 | -2.078731651 | 4.450573030  | 6.271017583  | 1 | 0 | 0 | # | ob |
| 858 | 6 | 4 | -1.050000 | -0.981894487 | 1.680900680  | 10.366131378 | 1 | 0 | 0 | # | ob |
| 859 | 6 | 4 | -1.050000 | -5.023189092 | 6.314939700  | 12.565579711 | 1 | 0 | 0 | # | ob |
| 860 | 6 | 4 | -1.050000 | -1.607035345 | 6.132051481  | 8.299077932  | 1 | 0 | 0 | # | ob |
| 861 | 6 | 4 | -1.050000 | -2.741532736 | 1.850546126  | 6.100653738  | 1 | 0 | 0 | # | ob |
| 862 | 6 | 8 | 2.100000  | -0.953702986 | 1.527119204  | 11.995277170 | 1 | 0 | 0 | # | st |
| 863 | 6 | 8 | 2.100000  | -1.634672226 | 5.973370782  | 6.670701903  | 1 | 0 | 0 | # | st |
| 864 | 6 | 8 | 2.100000  | -4.222997014 | 7.381980796  | 6.669722830  | 1 | 0 | 0 | # | st |
| 865 | 6 | 8 | 2.100000  | -1.634647014 | 2.927430796  | 6.669722830  | 1 | 0 | 0 | # | st |
| 866 | 6 | 8 | 2.100000  | -0.953677774 | 7.390279218  | 11.994298097 | 1 | 0 | 0 | # | st |
| 867 | 6 | 8 | 2.100000  | -3.542027774 | 2.935729218  | 11.994298097 | 1 | 0 | 0 | # | st |
| 868 | 6 | 8 | 2.100000  | -3.542052986 | 5.981669204  | 11.995277170 | 1 | 0 | 0 | # | st |
| 869 | 6 | 8 | 2.100000  | -4.223022226 | 1.518820782  | 6.670701903  | 1 | 0 | 0 | # | st |
| 870 | 6 | 1 | 1.575000  | -2.588144971 | 10.383761568 | 9.332770632  | 1 | 0 | 0 | # | ao |
| 871 | 6 | 1 | 1.575000  | -5.176494971 | 14.838311568 | 9.332770632  | 1 | 0 | 0 | # | ao |
| 872 | 6 | 1 | 1.575000  | -2.588555029 | 16.343538432 | 9.332229368  | 1 | 0 | 0 | # | ao |
| 873 | 6 | 1 | 1.575000  | -0.000205029 | 11.888988432 | 9.332229368  | 1 | 0 | 0 | # | ao |
| 874 | 6 | 2 | 0.425000  | -1.442049128 | 13.366367322 | 10.818615063 | 1 | 0 | 0 | # | ho |
| 875 | 6 | 2 | 0.425000  | -4.030399128 | 8.911817322  | 10.818615063 | 1 | 0 | 0 | # | ho |
| 876 | 6 | 2 | 0.425000  | -3.734650872 | 13.360932678 | 7.846384937  | 1 | 0 | 0 | # | ho |
| 877 | 6 | 2 | 0.425000  | -1.146300872 | 17.815482678 | 7.846384937  | 1 | 0 | 0 | # | ho |
| 878 | 6 | 4 | -1.050000 | -4.195385345 | 10.586601481 | 8.299077932  | 1 | 0 | 0 | # | ob |
| 879 | 6 | 4 | -1.050000 | -0.153182736 | 15.214196126 | 6.100653738  | 1 | 0 | 0 | # | ob |
| 880 | 6 | 4 | -1.050000 | -1.606455513 | 11.682749320 | 8.298868622  | 1 | 0 | 0 | # | ob |
| 881 | 6 | 4 | -1.050000 | -2.741860908 | 15.957810300 | 6.099420289  | 1 | 0 | 0 | # | ob |
| 882 | 6 | 4 | -1.050000 | -4.194805513 | 16.137299320 | 8.298868622  | 1 | 0 | 0 | # | ob |
| 883 | 6 | 4 | -1.050000 | -3.570244487 | 15.044550680 | 10.366131378 | 1 | 0 | 0 | # | ob |
| 884 | 6 | 4 | -1.050000 | -0.153510908 | 11.503260300 | 6.099420289  | 1 | 0 | 0 | # | ob |
| 885 | 6 | 4 | -1.050000 | -3.569664655 | 11.686148519 | 10.365922068 | 1 | 0 | 0 | # | ob |
| 886 | 6 | 4 | -1.050000 | -2.435167264 | 15.967653874 | 12.564346262 | 1 | 0 | 0 | # | ob |
| 887 | 6 | 4 | -1.050000 | -0.981314655 | 16.140698519 | 10.365922068 | 1 | 0 | 0 | # | ob |
| 888 | 6 | 4 | -1.050000 | -5.023517264 | 11.513103874 | 12.564346262 | 1 | 0 | 0 | # | ob |
| 889 | 6 | 4 | -1.050000 | -2.434839092 | 10.769489700 | 12.565579711 | 1 | 0 | 0 | # | ob |
| 890 | 6 | 7 | -0.950000 | -3.177442343 | 8.910040996  | 10.345082885 | 1 | 0 | 0 | # | oh |
| 891 | 6 | 4 | -1.050000 | -0.509618349 | 8.913076970  | 12.393982417 | 1 | 0 | 0 | # | ob |
| 892 | 6 | 7 | -0.950000 | -0.589092343 | 13.364590996 | 10.345082885 | 1 | 0 | 0 | # | oh |
| 893 | 6 | 4 | -1.050000 | -3.097968349 | 13.367626970 | 12.393982417 | 1 | 0 | 0 | # | ob |
| 894 | 6 | 7 | -0.950000 | -1.999257657 | 17.817259004 | 8.319917115  | 1 | 0 | 0 | # | oh |
| 895 | 6 | 4 | -1.050000 | -4.667081651 | 17.814223030 | 6.271017583  | 1 | 0 | 0 | # | ob |
| 896 | 6 | 7 | -0.950000 | -4.587607657 | 13.362709004 | 8.319917115  | 1 | 0 | 0 | # | oh |
| 897 | 6 | 4 | -1.050000 | -2.078731651 | 13.359673030 | 6.271017583  | 1 | 0 | 0 | # | ob |
| 898 | 6 | 4 | -1.050000 | -0.981894487 | 10.590000680 | 10.366131378 | 1 | 0 | 0 | # | ob |
| 899 | 6 | 4 | -1.050000 | -5.023189092 | 15.224039700 | 12.565579711 | 1 | 0 | 0 | # | ob |
| 900 | 6 | 4 | -1.050000 | -1.607035345 | 15.041151481 | 8.299077932  | 1 | 0 | 0 | # | ob |
| 901 | 6 | 4 | -1.050000 | -2.741532736 | 10.759646126 | 6.100653738  | 1 | 0 | 0 | # | ob |
| 902 | 6 | 8 | 2.100000  | -0.953702986 | 10.436219204 | 11.995277170 | 1 | 0 | 0 | # | st |
| 903 | 6 | 8 | 2.100000  | -1.634672226 | 14.882470782 | 6.670701903  | 1 | 0 | 0 | # | st |
| 904 | 6 | 8 | 2.100000  | -4.222997014 | 16.291080796 | 6.669722830  | 1 | 0 | 0 | # | st |
| 905 | 6 | 8 | 2.100000  | -1.634647014 | 11.836530796 | 6.669722830  | 1 | 0 | 0 | # | st |
| 906 | 6 | 8 | 2.100000  | -0.953677774 | 16.299379218 | 11.994298097 | 1 | 0 | 0 | # | st |
| 907 | 6 | 8 | 2.100000  | -3.542027774 | 11.844829218 | 11.994298097 | 1 | 0 | 0 | # | st |
| 908 | 6 | 8 | 2.100000  | -3.542052986 | 14.890769204 | 11.995277170 | 1 | 0 | 0 | # | st |
| 909 | 6 | 8 | 2.100000  | -4.223022226 | 10.427920782 | 6.670701903  | 1 | 0 | 0 | # | st |
| 910 | 6 | 1 | 1.575000  | -2.588144971 | 19.292861568 | 9.332770632  | 1 | 0 | 0 | # | ao |
| 911 | 6 | 1 | 1.575000  | -5.176494971 | 23.747411568 | 9.332770632  | 1 | 0 | 0 | # | ao |
| 912 | 6 | 1 | 1.575000  | -2.588555029 | 25.252638432 | 9.332229368  | 1 | 0 | 0 | # | ao |
| 913 | 6 | 1 | 1.575000  | -0.000205029 | 20.798088432 | 9.332229368  | 1 | 0 | 0 | # | ao |
| 914 | 6 | 2 | 0.425000  | -1.442049128 | 22.275467322 | 10.818615063 | 1 | 0 | 0 | # | ho |
| 915 | 6 | 2 | 0.425000  | -4.030399128 | 17.820917322 | 10.818615063 | 1 | 0 | 0 | # | ho |
| 916 | 6 | 2 | 0.425000  | -3.734650872 | 22.270032678 | 7.846384937  | 1 | 0 | 0 | # | ho |
| 917 | 6 | 2 | 0.425000  | -1.146300872 | 26.724582678 | 7.846384937  | 1 | 0 | 0 | # | ho |
| 918 | 6 | 4 | -1.050000 | -4.195385345 | 19.495701481 | 8.299077932  | 1 | 0 | 0 | # | ob |
| 919 | 6 | 4 | -1.050000 | -0.153182736 | 24.123296126 | 6.100653738  | 1 | 0 | 0 | # | ob |
| 920 | 6 | 4 | -1.050000 | -1.606455513 | 20.591849320 | 8.298868622  | 1 | 0 | 0 | # | ob |
| 921 | 6 | 4 | -1.050000 | -2.741860908 | 24.866910300 | 6.099420289  | 1 | 0 | 0 | # | ob |
| 922 | 6 | 4 | -1.050000 | -4.194805513 | 25.046399320 | 8.298868622  | 1 | 0 | 0 | # | ob |

|      |   |   |           |              |               |               |   |   |   |     |
|------|---|---|-----------|--------------|---------------|---------------|---|---|---|-----|
| 923  | 6 | 4 | -1.050000 | -3.570244487 | 23.953650680  | 10.366131378  | 1 | 0 | 0 | ob  |
| 924  | 6 | 4 | -1.050000 | -0.153510908 | 20.412360300  | 6.099420289   | 1 | 0 | 0 | ob  |
| 925  | 6 | 4 | -1.050000 | -3.569664655 | 20.595248519  | 10.365922068  | 1 | 0 | 0 | ob  |
| 926  | 6 | 4 | -1.050000 | -2.435167264 | 24.876753874  | 12.564346262  | 1 | 0 | 0 | ob  |
| 927  | 6 | 4 | -1.050000 | -0.981314655 | 25.049798519  | 10.365922068  | 1 | 0 | 0 | ob  |
| 928  | 6 | 4 | -1.050000 | -5.023517264 | 20.422203874  | 12.564346262  | 1 | 0 | 0 | ob  |
| 929  | 6 | 4 | -1.050000 | -2.434839092 | 19.678589700  | 12.565579711  | 1 | 0 | 0 | ob  |
| 930  | 6 | 7 | -0.950000 | -3.177442343 | 17.819140996  | 10.345082885  | 1 | 0 | 0 | oh  |
| 931  | 6 | 4 | -1.050000 | -0.509618349 | 17.822176970  | 12.393982417  | 1 | 0 | 0 | ob  |
| 932  | 6 | 7 | -0.950000 | -0.589092343 | 22.273690996  | 10.345082885  | 1 | 0 | 0 | oh  |
| 933  | 6 | 4 | -1.050000 | -3.097968349 | 22.276726970  | 12.393982417  | 1 | 0 | 0 | ob  |
| 934  | 6 | 7 | -0.950000 | -1.999257657 | 26.726359004  | 8.319917115   | 1 | 0 | 0 | oh  |
| 935  | 6 | 4 | -1.050000 | -4.667081651 | 26.723323030  | 6.271017583   | 1 | 0 | 0 | ob  |
| 936  | 6 | 7 | -0.950000 | -4.587607657 | 22.271809004  | 8.319917115   | 1 | 0 | 0 | oh  |
| 937  | 6 | 4 | -1.050000 | -2.078731651 | 22.268773030  | 6.271017583   | 1 | 0 | 0 | ob  |
| 938  | 6 | 4 | -1.050000 | -0.981894487 | 19.499100680  | 10.366131378  | 1 | 0 | 0 | ob  |
| 939  | 6 | 4 | -1.050000 | -5.023189092 | 24.133139700  | 12.565579711  | 1 | 0 | 0 | ob  |
| 940  | 6 | 4 | -1.050000 | -1.607035345 | 23.950251481  | 8.299077932   | 1 | 0 | 0 | ob  |
| 941  | 6 | 4 | -1.050000 | -2.741532736 | 19.668746126  | 6.100653738   | 1 | 0 | 0 | ob  |
| 942  | 6 | 8 | 2.100000  | -0.953702986 | 19.345319204  | 11.995277170  | 1 | 0 | 0 | st  |
| 943  | 6 | 8 | 2.100000  | -1.634672226 | 23.791570782  | 6.670701903   | 1 | 0 | 0 | st  |
| 944  | 6 | 8 | 2.100000  | -4.229297014 | 25.200180796  | 6.669722830   | 1 | 0 | 0 | st  |
| 945  | 6 | 8 | 2.100000  | -1.634647014 | 20.745630796  | 6.669722830   | 1 | 0 | 0 | st  |
| 946  | 6 | 8 | 2.100000  | -0.953677774 | 25.208479218  | 11.994298097  | 1 | 0 | 0 | st  |
| 947  | 6 | 8 | 2.100000  | -3.542027774 | 20.753929218  | 11.994298097  | 1 | 0 | 0 | st  |
| 948  | 6 | 8 | 2.100000  | -3.542052986 | 23.799869204  | 11.995277170  | 1 | 0 | 0 | st  |
| 949  | 6 | 8 | 2.100000  | -4.223022226 | 19.337020782  | 6.670701903   | 1 | 0 | 0 | st  |
| 950  | 6 | 1 | 1.575000  | -2.588144971 | -27.434438432 | 9.332770632   | 1 | 1 | 0 | ao  |
| 951  | 6 | 1 | 1.575000  | -5.176494971 | -22.979888432 | 9.332770632   | 1 | 1 | 0 | ao  |
| 952  | 6 | 1 | 1.575000  | -2.588555029 | -21.474661568 | 9.332229368   | 1 | 1 | 0 | ao  |
| 953  | 6 | 1 | 1.575000  | -0.000205029 | -25.929211568 | 9.332229368   | 1 | 1 | 0 | ao  |
| 954  | 6 | 2 | 0.425000  | -1.442049128 | -24.451832678 | 10.818615063  | 1 | 1 | 0 | ho  |
| 955  | 6 | 2 | 0.425000  | -4.030399128 | 26.730017322  | 10.818615063  | 1 | 0 | 0 | ho  |
| 956  | 6 | 2 | 0.425000  | -3.734650872 | -24.457267322 | 7.846384937   | 1 | 1 | 0 | ho  |
| 957  | 6 | 3 | 0.425000  | -1.146300872 | -20.002717322 | 7.846384937   | 1 | 1 | 0 | do  |
| 958  | 6 | 4 | -1.050000 | -4.195385345 | -27.231598519 | 8.299077932   | 1 | 1 | 0 | ob  |
| 959  | 6 | 4 | -1.050000 | -0.153182736 | -22.604003874 | 6.100653738   | 1 | 1 | 0 | ob  |
| 960  | 6 | 4 | -1.050000 | -1.606455513 | -26.135450680 | 8.298868622   | 1 | 1 | 0 | ob  |
| 961  | 6 | 4 | -1.050000 | -2.741860908 | -21.860389700 | 6.099420289   | 1 | 1 | 0 | ob  |
| 962  | 6 | 4 | -1.050000 | -4.194805513 | -21.680900680 | 8.298868622   | 1 | 1 | 0 | ob  |
| 963  | 6 | 4 | -1.050000 | -3.570244487 | -22.773649320 | 10.366131378  | 1 | 1 | 0 | ob  |
| 964  | 6 | 4 | -1.050000 | -0.153510908 | -26.314939700 | 6.099420289   | 1 | 1 | 0 | ob  |
| 965  | 6 | 4 | -1.050000 | -3.569664655 | -26.132051481 | 10.365922068  | 1 | 1 | 0 | ob  |
| 966  | 6 | 4 | -1.050000 | -2.435167264 | -21.850546126 | 12.564346262  | 1 | 1 | 0 | ob  |
| 967  | 6 | 4 | -1.050000 | -0.981314655 | -21.677501481 | 10.365922068  | 1 | 1 | 0 | ob  |
| 968  | 6 | 4 | -1.050000 | -5.023517264 | -26.305096126 | 12.564346262  | 1 | 1 | 0 | ob  |
| 969  | 6 | 4 | -1.050000 | -2.434839092 | -27.048710300 | 12.565579711  | 1 | 1 | 0 | ob  |
| 970  | 6 | 7 | -0.950000 | -3.177442343 | 26.728240996  | 10.345082885  | 1 | 0 | 0 | oh  |
| 971  | 6 | 4 | -1.050000 | -0.509618349 | 26.731276970  | 12.393982417  | 1 | 0 | 0 | ob  |
| 972  | 6 | 7 | -0.950000 | -0.589092343 | -24.453609004 | 10.345082885  | 1 | 1 | 0 | oh  |
| 973  | 6 | 4 | -1.050000 | -3.097968349 | -24.450573030 | 12.393982417  | 1 | 1 | 0 | ob  |
| 974  | 6 | 5 | -0.950000 | -1.999257657 | -20.000940996 | 8.319917115   | 1 | 1 | 0 | oho |
| 975  | 6 | 6 | -0.950000 | -4.667081651 | -20.003976970 | 6.271017583   | 1 | 1 | 0 | oht |
| 976  | 6 | 7 | -0.950000 | -4.587607657 | -24.455490996 | 8.319917115   | 1 | 1 | 0 | oh  |
| 977  | 6 | 4 | -1.050000 | -2.078731651 | -24.458526970 | 6.271017583   | 1 | 1 | 0 | ob  |
| 978  | 6 | 4 | -1.050000 | -0.981894487 | -27.228199320 | 10.366131378  | 1 | 1 | 0 | ob  |
| 979  | 6 | 4 | -1.050000 | -5.023189092 | -22.594160300 | 12.565579711  | 1 | 1 | 0 | ob  |
| 980  | 6 | 4 | -1.050000 | -1.607035345 | -22.777048519 | 8.299077932   | 1 | 1 | 0 | ob  |
| 981  | 6 | 4 | -1.050000 | -2.741532736 | -27.058553874 | 6.100653738   | 1 | 1 | 0 | ob  |
| 982  | 6 | 8 | 2.100000  | -0.953702986 | -27.381980796 | 11.995277170  | 1 | 1 | 0 | st  |
| 983  | 6 | 8 | 2.100000  | -1.634672226 | -22.935729218 | 6.670701903   | 1 | 1 | 0 | st  |
| 984  | 6 | 8 | 2.100000  | -4.229297014 | -21.527119204 | 6.669722830   | 1 | 1 | 0 | st  |
| 985  | 6 | 8 | 2.100000  | -1.634647014 | -25.981669204 | 6.669722830   | 1 | 1 | 0 | st  |
| 986  | 6 | 8 | 2.100000  | -0.953677774 | -21.518820782 | 11.994298097  | 1 | 1 | 0 | st  |
| 987  | 6 | 8 | 2.100000  | -3.542027774 | -25.973370782 | 11.994298097  | 1 | 1 | 0 | st  |
| 988  | 6 | 8 | 2.100000  | -3.542052986 | -22.927430796 | 11.995277170  | 1 | 1 | 0 | st  |
| 989  | 6 | 8 | 2.100000  | -4.223022226 | -27.390279218 | 6.670701903   | 1 | 1 | 0 | st  |
| 990  | 6 | 6 | -0.950000 | -0.439233573 | -19.680858114 | -16.076279050 | 1 | 1 | 1 | oht |
| 991  | 6 | 6 | -0.950000 | -4.871761797 | -0.272172439  | 15.863272887  | 1 | 0 | 0 | oht |
| 992  | 6 | 3 | 0.425000  | -5.220127747 | -1.308055357  | 15.669139507  | 1 | 0 | 0 | do  |
| 993  | 6 | 3 | 0.425000  | -0.176711381 | -1.054326608  | -15.567929463 | 1 | 0 | 1 | do  |
| 994  | 6 | 3 | 0.425000  | -0.312851036 | -18.596754758 | -16.278386456 | 1 | 1 | 1 | do  |
| 995  | 6 | 3 | 0.425000  | -5.063651085 | -19.012312375 | 15.301136949  | 1 | 1 | 0 | do  |
| 996  | 7 | 1 | 1.575000  | 2.588555029  | 1.474661568   | -18.664729368 | 0 | 0 | 1 | ao  |
| 997  | 7 | 1 | 1.575000  | 0.000205029  | 5.929211568   | -18.664729368 | 0 | 0 | 1 | ao  |
| 998  | 7 | 1 | 1.575000  | 2.588144971  | 7.434438432   | 18.664729368  | 0 | 0 | 0 | ao  |
| 999  | 7 | 1 | 1.575000  | 5.176494971  | 2.979888432   | 18.664729368  | 0 | 0 | 0 | ao  |
| 1000 | 7 | 2 | 0.425000  | 3.734650872  | 4.457267322   | -17.178884937 | 0 | 0 | 1 | ho  |
| 1001 | 7 | 3 | 0.425000  | 1.146300872  | 0.002717322   | -17.178884937 | 0 | 0 | 1 | do  |
| 1002 | 7 | 2 | 0.425000  | 1.442049128  | 4.451832678   | 17.178884937  | 0 | 0 | 0 | ho  |
| 1003 | 7 | 2 | 0.425000  | 4.030399128  | 8.906382678   | 17.178884937  | 0 | 0 | 0 | ho  |
| 1004 | 7 | 4 | -1.050000 | 0.981314655  | 1.677501481   | 17.631577932  | 0 | 0 | 0 | ob  |
| 1005 | 7 | 4 | -1.050000 | 5.023517264  | 6.305096126   | 15.433153738  | 0 | 0 | 0 | ob  |
| 1006 | 7 | 4 | -1.050000 | 3.570244487  | 2.773649320   | 17.631368622  | 0 | 0 | 0 | ob  |
| 1007 | 7 | 4 | -1.050000 | 2.434839092  | 7.048710300   | 15.431920289  | 0 | 0 | 0 | ob  |
| 1008 | 7 | 4 | -1.050000 | 0.981894487  | 7.228199320   | 17.631368622  | 0 | 0 | 0 | ob  |
| 1009 | 7 | 4 | -1.050000 | 1.606455513  | 6.135450680   | -17.631368622 | 0 | 0 | 1 | ob  |
| 1010 | 7 | 4 | -1.050000 | 5.023189092  | 2.594160300   | 15.431920289  | 0 | 0 | 0 | ob  |
| 1011 | 7 | 4 | -1.050000 | 1.607035345  | 2.777048519   | -17.631577932 | 0 | 0 | 1 | ob  |
| 1012 | 7 | 4 | -1.050000 | 2.741532736  | 7.058553874   | -15.433153738 | 0 | 0 | 1 | ob  |
| 1013 | 7 | 4 | -1.050000 | 4.195385345  | 7.231598519   | -17.631577932 | 0 | 0 | 1 | ob  |
| 1014 | 7 | 4 | -1.050000 | 0.153182736  | 2.604003874   | -15.433153738 | 0 | 0 | 1 | ob  |
| 1015 | 7 | 4 | -1.050000 | 2.741860908  | 1.860389700   | -15.431920289 | 0 | 0 | 1 | ob  |

|      |   |   |           |             |              |               |   |   |   |   |     |
|------|---|---|-----------|-------------|--------------|---------------|---|---|---|---|-----|
| 1016 | 7 | 5 | -0.950000 | 1.999257657 | 0.000940996  | -17.652417115 | 0 | 0 | 1 | # | oho |
| 1017 | 7 | 6 | -0.950000 | 4.667081651 | 0.003976970  | -15.603517583 | 0 | 0 | 1 | # | oht |
| 1018 | 7 | 7 | -0.950000 | 4.587607657 | 4.455490996  | -17.652417115 | 0 | 0 | 1 | # | oh  |
| 1019 | 7 | 4 | -1.050000 | 2.078731651 | 4.458526970  | -15.603517583 | 0 | 0 | 1 | # | ob  |
| 1020 | 7 | 7 | -0.950000 | 3.177442343 | 8.908159004  | 17.652417115  | 0 | 0 | 0 | # | oh  |
| 1021 | 7 | 4 | -1.050000 | 0.509618349 | 8.905123030  | 15.603517583  | 0 | 0 | 0 | # | ob  |
| 1022 | 7 | 7 | -0.950000 | 0.589092343 | 4.453609004  | 17.652417115  | 0 | 0 | 0 | # | oh  |
| 1023 | 7 | 4 | -1.050000 | 3.097968349 | 4.450573030  | 15.603517583  | 0 | 0 | 0 | # | ob  |
| 1024 | 7 | 4 | -1.050000 | 4.194805513 | 1.680900680  | -17.631368622 | 0 | 0 | 1 | # | ob  |
| 1025 | 7 | 4 | -1.050000 | 0.153510908 | 6.314939700  | -15.431920289 | 0 | 0 | 1 | # | ob  |
| 1026 | 7 | 4 | -1.050000 | 3.569664655 | 6.132051481  | 17.631577932  | 0 | 0 | 0 | # | ob  |
| 1027 | 7 | 4 | -1.050000 | 2.435167264 | 1.850546126  | 15.433153738  | 0 | 0 | 0 | # | ob  |
| 1028 | 7 | 8 | 2.100000  | 4.222997014 | 1.527119204  | -16.002222830 | 0 | 0 | 1 | # | st  |
| 1029 | 7 | 8 | 2.100000  | 3.542027774 | 5.973370782  | 16.003201903  | 0 | 0 | 0 | # | st  |
| 1030 | 7 | 8 | 2.100000  | 0.953702986 | 7.381980796  | 16.002222830  | 0 | 0 | 0 | # | st  |
| 1031 | 7 | 8 | 2.100000  | 3.542052986 | 2.927430796  | 16.002222830  | 0 | 0 | 0 | # | st  |
| 1032 | 7 | 8 | 2.100000  | 4.223022226 | 7.390279218  | -16.003201903 | 0 | 0 | 1 | # | st  |
| 1033 | 7 | 8 | 2.100000  | 1.634672226 | 2.935729218  | -16.003201903 | 0 | 0 | 1 | # | st  |
| 1034 | 7 | 8 | 2.100000  | 1.634647014 | 5.981669204  | -16.002222830 | 0 | 0 | 1 | # | st  |
| 1035 | 7 | 8 | 2.100000  | 0.953677774 | 1.518820782  | 16.003201903  | 0 | 0 | 0 | # | st  |
| 1036 | 7 | 1 | 1.575000  | 2.588555029 | 10.383761568 | -18.664729368 | 0 | 0 | 1 | # | ao  |
| 1037 | 7 | 1 | 1.575000  | 0.000205029 | 14.838311568 | -18.664729368 | 0 | 0 | 1 | # | ao  |
| 1038 | 7 | 1 | 1.575000  | 2.588144971 | 16.343538432 | 18.664729368  | 0 | 0 | 0 | # | ao  |
| 1039 | 7 | 1 | 1.575000  | 5.176494971 | 11.888988432 | 18.664729368  | 0 | 0 | 0 | # | ao  |
| 1040 | 7 | 2 | 0.425000  | 3.734650872 | 13.366367322 | -17.178884937 | 0 | 0 | 1 | # | ho  |
| 1041 | 7 | 2 | 0.425000  | 1.146300872 | 8.911817322  | -17.178884937 | 0 | 0 | 1 | # | ho  |
| 1042 | 7 | 2 | 0.425000  | 1.442049128 | 13.360932678 | 17.178884937  | 0 | 0 | 0 | # | ho  |
| 1043 | 7 | 2 | 0.425000  | 4.030399128 | 17.815482678 | 17.178884937  | 0 | 0 | 0 | # | ho  |
| 1044 | 7 | 4 | -1.050000 | 0.981314655 | 10.586601481 | 17.631577932  | 0 | 0 | 0 | # | ob  |
| 1045 | 7 | 4 | -1.050000 | 5.023517264 | 15.214196126 | 15.433153738  | 0 | 0 | 0 | # | ob  |
| 1046 | 7 | 4 | -1.050000 | 3.570244487 | 11.682749320 | 17.631368622  | 0 | 0 | 0 | # | ob  |
| 1047 | 7 | 4 | -1.050000 | 2.434839092 | 15.957810300 | 15.431920289  | 0 | 0 | 0 | # | ob  |
| 1048 | 7 | 4 | -1.050000 | 0.981894487 | 16.137299320 | 17.631368622  | 0 | 0 | 0 | # | ob  |
| 1049 | 7 | 4 | -1.050000 | 1.606455513 | 15.044550680 | -17.631368622 | 0 | 0 | 1 | # | ob  |
| 1050 | 7 | 4 | -1.050000 | 5.023189092 | 11.503260300 | 15.431920289  | 0 | 0 | 0 | # | ob  |
| 1051 | 7 | 4 | -1.050000 | 1.607035345 | 11.686148519 | -17.631577932 | 0 | 0 | 1 | # | ob  |
| 1052 | 7 | 4 | -1.050000 | 2.741532736 | 15.967653874 | -15.433153738 | 0 | 0 | 1 | # | ob  |
| 1053 | 7 | 4 | -1.050000 | 4.195385345 | 16.140698519 | -17.631577932 | 0 | 0 | 1 | # | ob  |
| 1054 | 7 | 4 | -1.050000 | 0.153182736 | 11.513103874 | -15.433153738 | 0 | 0 | 1 | # | ob  |
| 1055 | 7 | 4 | -1.050000 | 2.741860908 | 10.769489700 | -15.431920289 | 0 | 0 | 1 | # | ob  |
| 1056 | 7 | 7 | -0.950000 | 1.999257657 | 8.910040996  | -17.652417115 | 0 | 0 | 1 | # | oh  |
| 1057 | 7 | 4 | -1.050000 | 4.667081651 | 8.913076970  | -15.603517583 | 0 | 0 | 1 | # | ob  |
| 1058 | 7 | 7 | -0.950000 | 4.587607657 | 13.364590996 | -17.652417115 | 0 | 0 | 1 | # | oh  |
| 1059 | 7 | 4 | -1.050000 | 2.078731651 | 13.367626970 | -15.603517583 | 0 | 0 | 1 | # | ob  |
| 1060 | 7 | 7 | -0.950000 | 3.177442343 | 17.817259004 | 17.652417115  | 0 | 0 | 0 | # | oh  |
| 1061 | 7 | 4 | -1.050000 | 0.509618349 | 17.814223030 | 15.603517583  | 0 | 0 | 0 | # | ob  |
| 1062 | 7 | 7 | -0.950000 | 0.589092343 | 13.362709004 | 17.652417115  | 0 | 0 | 0 | # | oh  |
| 1063 | 7 | 4 | -1.050000 | 3.097968349 | 13.359673030 | 15.603517583  | 0 | 0 | 0 | # | ob  |
| 1064 | 7 | 4 | -1.050000 | 4.194805513 | 10.590000680 | -17.631368622 | 0 | 0 | 1 | # | ob  |
| 1065 | 7 | 4 | -1.050000 | 0.153510908 | 15.224039700 | -15.431920289 | 0 | 0 | 1 | # | ob  |
| 1066 | 7 | 4 | -1.050000 | 3.569664655 | 15.041151481 | 17.631577932  | 0 | 0 | 0 | # | ob  |
| 1067 | 7 | 4 | -1.050000 | 2.435167264 | 10.759646126 | 15.433153738  | 0 | 0 | 0 | # | ob  |
| 1068 | 7 | 8 | 2.100000  | 4.222997014 | 10.436219204 | -16.002222830 | 0 | 0 | 1 | # | st  |
| 1069 | 7 | 8 | 2.100000  | 3.542027774 | 14.882470782 | 16.003201903  | 0 | 0 | 0 | # | st  |
| 1070 | 7 | 8 | 2.100000  | 0.953702986 | 16.291080796 | 16.002222830  | 0 | 0 | 0 | # | st  |
| 1071 | 7 | 8 | 2.100000  | 3.542052986 | 11.836530796 | 16.002222830  | 0 | 0 | 0 | # | st  |
| 1072 | 7 | 8 | 2.100000  | 4.223022226 | 16.299379218 | -16.003201903 | 0 | 0 | 1 | # | st  |
| 1073 | 7 | 8 | 2.100000  | 1.634672226 | 11.844829218 | -16.003201903 | 0 | 0 | 1 | # | st  |
| 1074 | 7 | 8 | 2.100000  | 1.634647014 | 14.890769204 | -16.002222830 | 0 | 0 | 1 | # | st  |
| 1075 | 7 | 8 | 2.100000  | 0.953677774 | 10.427920782 | 16.003201903  | 0 | 0 | 0 | # | st  |
| 1076 | 7 | 1 | 1.575000  | 2.588555029 | 19.292861568 | -18.664729368 | 0 | 0 | 1 | # | ao  |
| 1077 | 7 | 1 | 1.575000  | 0.000205029 | 23.747411568 | -18.664729368 | 0 | 0 | 1 | # | ao  |
| 1078 | 7 | 1 | 1.575000  | 2.588144971 | 25.252638432 | 18.664729368  | 0 | 0 | 0 | # | ao  |
| 1079 | 7 | 1 | 1.575000  | 5.176494971 | 20.798088432 | 18.664729368  | 0 | 0 | 0 | # | ao  |
| 1080 | 7 | 2 | 0.425000  | 3.734650872 | 22.275467322 | -17.178884937 | 0 | 0 | 1 | # | ho  |
| 1081 | 7 | 2 | 0.425000  | 1.146300872 | 17.820917322 | -17.178884937 | 0 | 0 | 1 | # | ho  |
| 1082 | 7 | 2 | 0.425000  | 1.442049128 | 22.270032678 | 17.178884937  | 0 | 0 | 0 | # | ho  |
| 1083 | 7 | 2 | 0.425000  | 4.030399128 | 26.724582678 | 17.178884937  | 0 | 0 | 0 | # | ho  |
| 1084 | 7 | 4 | -1.050000 | 0.981314655 | 19.495701481 | 17.631577932  | 0 | 0 | 0 | # | ob  |
| 1085 | 7 | 4 | -1.050000 | 5.023517264 | 24.123296126 | 15.433153738  | 0 | 0 | 0 | # | ob  |
| 1086 | 7 | 4 | -1.050000 | 3.570244487 | 20.591849320 | 17.631368622  | 0 | 0 | 0 | # | ob  |
| 1087 | 7 | 4 | -1.050000 | 2.434839092 | 24.866910300 | 15.431920289  | 0 | 0 | 0 | # | ob  |
| 1088 | 7 | 4 | -1.050000 | 0.981894487 | 25.046399320 | 17.631368622  | 0 | 0 | 0 | # | ob  |
| 1089 | 7 | 4 | -1.050000 | 1.606455513 | 23.953650680 | -17.631368622 | 0 | 0 | 1 | # | ob  |
| 1090 | 7 | 4 | -1.050000 | 5.023189092 | 20.412360300 | 15.431920289  | 0 | 0 | 0 | # | ob  |
| 1091 | 7 | 4 | -1.050000 | 1.607035345 | 20.595248519 | -17.631577932 | 0 | 0 | 1 | # | ob  |
| 1092 | 7 | 4 | -1.050000 | 2.741532736 | 24.876753874 | -15.433153738 | 0 | 0 | 1 | # | ob  |
| 1093 | 7 | 4 | -1.050000 | 4.195385345 | 25.049798519 | -17.631577932 | 0 | 0 | 1 | # | ob  |
| 1094 | 7 | 4 | -1.050000 | 0.153182736 | 20.422203874 | -15.433153738 | 0 | 0 | 1 | # | ob  |
| 1095 | 7 | 4 | -1.050000 | 2.741860908 | 19.678589700 | -15.431920289 | 0 | 0 | 1 | # | ob  |
| 1096 | 7 | 7 | -0.950000 | 1.999257657 | 17.819140996 | -17.652417115 | 0 | 0 | 1 | # | oh  |
| 1097 | 7 | 4 | -1.050000 | 4.667081651 | 17.822176970 | -15.603517583 | 0 | 0 | 1 | # | ob  |
| 1098 | 7 | 7 | -0.950000 | 4.587607657 | 22.273690996 | -17.652417115 | 0 | 0 | 1 | # | oh  |
| 1099 | 7 | 4 | -1.050000 | 2.078731651 | 22.276726970 | -15.603517583 | 0 | 0 | 1 | # | ob  |
| 1100 | 7 | 7 | -0.950000 | 3.177442343 | 26.726359004 | 17.652417115  | 0 | 0 | 0 | # | oh  |
| 1101 | 7 | 4 | -1.050000 | 0.509618349 | 26.723323030 | 15.603517583  | 0 | 0 | 0 | # | ob  |
| 1102 | 7 | 7 | -0.950000 | 0.589092343 | 22.271809004 | 17.652417115  | 0 | 0 | 0 | # | oh  |
| 1103 | 7 | 4 | -1.050000 | 3.097968349 | 22.268773030 | 15.603517583  | 0 | 0 | 0 | # | ob  |
| 1104 | 7 | 4 | -1.050000 | 4.194805513 | 19.499100680 | -17.631368622 | 0 | 0 | 1 | # | ob  |
| 1105 | 7 | 4 | -1.050000 | 0.153510908 | 24.133139700 | -15.431920289 | 0 | 0 | 1 | # | ob  |
| 1106 | 7 | 4 | -1.050000 | 3.569664655 | 23.950251481 | 17.631577932  | 0 | 0 | 0 | # | ob  |
| 1107 | 7 | 4 | -1.050000 | 2.435167264 | 19.668746126 | 15.433153738  | 0 | 0 | 0 | # | ob  |
| 1108 | 7 | 8 | 2.100000  | 4.222997014 | 19.345319204 | -16.002222830 | 0 | 0 | 1 | # | st  |

|      |   |   |           |              |               |               |   |   |   |   |     |
|------|---|---|-----------|--------------|---------------|---------------|---|---|---|---|-----|
| 1109 | 7 | 8 | 2.100000  | 3.542027774  | 23.791570782  | 16.003201903  | 0 | 0 | 0 | # | st  |
| 1110 | 7 | 8 | 2.100000  | 0.953702986  | 25.200180796  | 16.002222830  | 0 | 0 | 0 | # | st  |
| 1111 | 7 | 8 | 2.100000  | 3.542052986  | 20.745630796  | 16.002222830  | 0 | 0 | 0 | # | st  |
| 1112 | 7 | 8 | 2.100000  | 4.223022226  | 25.208479218  | -16.003201903 | 0 | 0 | 1 | # | st  |
| 1113 | 7 | 8 | 2.100000  | 1.634672226  | 20.753929218  | -16.003201903 | 0 | 0 | 1 | # | st  |
| 1114 | 7 | 8 | 2.100000  | 1.634647014  | 23.799869204  | -16.002222830 | 0 | 0 | 1 | # | st  |
| 1115 | 7 | 8 | 2.100000  | 0.953677774  | 19.337020782  | 16.003201903  | 0 | 0 | 0 | # | st  |
| 1116 | 7 | 1 | 1.575000  | 2.588555029  | -27.434438432 | -18.664729368 | 0 | 1 | 1 | # | ao  |
| 1117 | 7 | 1 | 1.575000  | 0.000205029  | -22.979888432 | -18.664729368 | 0 | 1 | 1 | # | ao  |
| 1118 | 7 | 1 | 1.575000  | 2.588144971  | -21.474661568 | 18.664729368  | 0 | 1 | 0 | # | ao  |
| 1119 | 7 | 1 | 1.575000  | 5.176494971  | -25.929211568 | 18.664729368  | 0 | 1 | 0 | # | ao  |
| 1120 | 7 | 2 | 0.425000  | 3.734650872  | -24.451832678 | -17.178884937 | 0 | 1 | 1 | # | ho  |
| 1121 | 7 | 2 | 0.425000  | 1.146300872  | 26.730017322  | -17.178884937 | 0 | 0 | 1 | # | ho  |
| 1122 | 7 | 2 | 0.425000  | 1.442049128  | -24.457267322 | 17.178884937  | 0 | 1 | 0 | # | ho  |
| 1123 | 7 | 3 | 0.425000  | 4.030399128  | -20.002717322 | 17.178884937  | 0 | 1 | 0 | # | do  |
| 1124 | 7 | 4 | -1.050000 | 0.981314655  | -27.231598519 | 17.631577932  | 0 | 1 | 0 | # | ob  |
| 1125 | 7 | 4 | -1.050000 | 5.023517264  | -22.604003874 | 15.433153738  | 0 | 1 | 0 | # | ob  |
| 1126 | 7 | 4 | -1.050000 | 3.570244487  | -26.135450680 | 17.631368622  | 0 | 1 | 0 | # | ob  |
| 1127 | 7 | 4 | -1.050000 | 2.434839092  | -21.860389700 | 15.431920289  | 0 | 1 | 0 | # | ob  |
| 1128 | 7 | 4 | -1.050000 | 0.981894487  | -21.680900680 | 17.631368622  | 0 | 1 | 0 | # | ob  |
| 1129 | 7 | 4 | -1.050000 | 1.606455513  | -22.773649320 | -17.631368622 | 0 | 1 | 1 | # | ob  |
| 1130 | 7 | 4 | -1.050000 | 5.023189092  | -26.314939700 | 15.431920289  | 0 | 1 | 0 | # | ob  |
| 1131 | 7 | 4 | -1.050000 | 1.607035345  | -26.132051481 | -17.631577932 | 0 | 1 | 1 | # | ob  |
| 1132 | 7 | 4 | -1.050000 | 2.741532736  | -21.850546126 | -15.433153738 | 0 | 1 | 1 | # | ob  |
| 1133 | 7 | 4 | -1.050000 | 4.195385345  | -21.677501481 | -17.631577932 | 0 | 1 | 1 | # | ob  |
| 1134 | 7 | 4 | -1.050000 | 0.153182736  | -26.305096126 | -15.433153738 | 0 | 1 | 1 | # | ob  |
| 1135 | 7 | 4 | -1.050000 | 2.741860908  | -27.048710300 | -15.431920289 | 0 | 1 | 1 | # | ob  |
| 1136 | 7 | 7 | -0.950000 | 1.999257657  | 26.728240996  | -17.652417115 | 0 | 1 | 0 | # | oh  |
| 1137 | 7 | 4 | -1.050000 | 4.667081651  | 26.731276970  | -15.603517583 | 0 | 0 | 1 | # | ob  |
| 1138 | 7 | 7 | -0.950000 | 4.587607657  | -24.453609004 | -17.652417115 | 0 | 1 | 1 | # | oh  |
| 1139 | 7 | 4 | -1.050000 | 2.078731651  | -24.450573030 | -15.603517583 | 0 | 1 | 1 | # | ob  |
| 1140 | 7 | 5 | -0.950000 | 3.177442343  | -20.000940996 | 17.652417115  | 0 | 1 | 0 | # | oht |
| 1141 | 7 | 6 | -0.950000 | 0.509618349  | -20.003976970 | 15.603517583  | 0 | 1 | 0 | # | oht |
| 1142 | 7 | 7 | -0.950000 | 0.589092343  | -24.455490996 | 17.652417115  | 0 | 1 | 0 | # | oh  |
| 1143 | 7 | 4 | -1.050000 | 3.097968349  | -24.458526970 | 15.603517583  | 0 | 1 | 0 | # | ob  |
| 1144 | 7 | 4 | -1.050000 | 4.194805513  | -27.228199320 | -17.631368622 | 0 | 1 | 1 | # | ob  |
| 1145 | 7 | 4 | -1.050000 | 0.153510908  | -22.594160300 | -15.431920289 | 0 | 1 | 1 | # | ob  |
| 1146 | 7 | 4 | -1.050000 | 3.569664655  | -22.777048519 | 17.631577932  | 0 | 1 | 0 | # | ob  |
| 1147 | 7 | 4 | -1.050000 | 2.435167264  | -27.058553874 | 15.433153738  | 0 | 1 | 0 | # | ob  |
| 1148 | 7 | 8 | 2.100000  | 4.222997014  | -27.381980796 | -16.002222830 | 0 | 1 | 1 | # | st  |
| 1149 | 7 | 8 | 2.100000  | 3.542027774  | -22.935729218 | 16.003201903  | 0 | 1 | 0 | # | st  |
| 1150 | 7 | 8 | 2.100000  | 0.953702986  | -21.527119204 | 16.002222830  | 0 | 1 | 0 | # | st  |
| 1151 | 7 | 8 | 2.100000  | 3.542052986  | -25.981669204 | 16.002222830  | 0 | 1 | 0 | # | st  |
| 1152 | 7 | 8 | 2.100000  | 4.223022226  | -21.518820782 | -16.003201903 | 0 | 1 | 1 | # | st  |
| 1153 | 7 | 8 | 2.100000  | 1.634672226  | -25.973370782 | -16.003201903 | 0 | 1 | 1 | # | st  |
| 1154 | 7 | 8 | 2.100000  | 1.634647014  | -22.927430796 | -16.002222830 | 0 | 1 | 1 | # | st  |
| 1155 | 7 | 8 | 2.100000  | 0.953677774  | -27.390279218 | 16.003201903  | 0 | 1 | 0 | # | st  |
| 1156 | 7 | 6 | -0.950000 | 4.737466427  | -19.680858114 | -6.743779050  | 0 | 1 | 1 | # | oht |
| 1157 | 7 | 6 | -0.950000 | 0.304938203  | -0.272172439  | -12.134227113 | 0 | 0 | 1 | # | oht |
| 1158 | 7 | 3 | 0.425000  | 4.999886619  | -1.054326608  | -6.235429463  | 0 | 0 | 1 | # | do  |
| 1159 | 7 | 3 | 0.425000  | 4.863848964  | -18.596754758 | -6.945886456  | 0 | 1 | 1 | # | do  |
| 1160 | 7 | 3 | 0.425000  | 0.113048915  | -19.012312375 | -12.696363051 | 0 | 1 | 1 | # | do  |
| 1161 | 8 | 1 | 1.575000  | 7.765255029  | 1.474661568   | -18.664729368 | 0 | 0 | 1 | # | ao  |
| 1162 | 8 | 1 | 1.575000  | 5.176905029  | 5.929211568   | -18.664729368 | 0 | 0 | 1 | # | ao  |
| 1163 | 8 | 1 | 1.575000  | 7.764844971  | 7.434438432   | 18.664729368  | 0 | 0 | 0 | # | ao  |
| 1164 | 8 | 1 | 1.575000  | 10.353194971 | 2.979888432   | 18.664729368  | 0 | 0 | 0 | # | ao  |
| 1165 | 8 | 2 | 0.425000  | 8.911350872  | 4.457267322   | -17.178884937 | 0 | 0 | 1 | # | ho  |
| 1166 | 8 | 3 | 0.425000  | 6.323000872  | 0.002717322   | -17.178884937 | 0 | 0 | 1 | # | do  |
| 1167 | 8 | 2 | 0.425000  | 6.618749128  | 4.451832678   | 17.178884937  | 0 | 0 | 0 | # | ho  |
| 1168 | 8 | 2 | 0.425000  | 9.207099128  | 8.906382678   | 17.178884937  | 0 | 0 | 0 | # | ho  |
| 1169 | 8 | 4 | -1.050000 | 6.158014655  | 1.677501481   | 17.631577932  | 0 | 0 | 0 | # | ob  |
| 1170 | 8 | 4 | -1.050000 | 10.200217264 | 6.305096126   | 15.433153738  | 0 | 0 | 0 | # | ob  |
| 1171 | 8 | 4 | -1.050000 | 8.746944487  | 2.773649320   | 17.631368622  | 0 | 0 | 0 | # | ob  |
| 1172 | 8 | 4 | -1.050000 | 7.611539092  | 7.048710300   | 15.431920289  | 0 | 0 | 0 | # | ob  |
| 1173 | 8 | 4 | -1.050000 | 6.158594487  | 7.228199320   | 17.631368622  | 0 | 0 | 0 | # | ob  |
| 1174 | 8 | 4 | -1.050000 | 6.783155513  | 6.135450680   | -17.631368622 | 0 | 0 | 1 | # | ob  |
| 1175 | 8 | 4 | -1.050000 | 10.199889092 | 2.594160300   | 15.431920289  | 0 | 0 | 0 | # | ob  |
| 1176 | 8 | 4 | -1.050000 | 6.783735345  | 2.777048519   | -17.631577932 | 0 | 0 | 1 | # | ob  |
| 1177 | 8 | 4 | -1.050000 | 7.918232736  | 7.058553874   | -15.433153738 | 0 | 0 | 1 | # | ob  |
| 1178 | 8 | 4 | -1.050000 | 9.372085345  | 7.231598519   | -17.631577932 | 0 | 0 | 1 | # | ob  |
| 1179 | 8 | 4 | -1.050000 | 5.329882736  | 2.604003874   | -15.433153738 | 0 | 0 | 1 | # | ob  |
| 1180 | 8 | 4 | -1.050000 | 7.918560908  | 1.860389700   | -15.431920289 | 0 | 0 | 1 | # | ob  |
| 1181 | 8 | 5 | -0.950000 | 7.175957657  | 0.000940996   | -17.652417115 | 0 | 0 | 1 | # | oho |
| 1182 | 8 | 6 | -0.950000 | 9.843781651  | 0.003976970   | -15.603517583 | 0 | 0 | 1 | # | oht |
| 1183 | 8 | 7 | -0.950000 | 9.764307657  | 4.455490996   | -17.652417115 | 0 | 0 | 1 | # | oh  |
| 1184 | 8 | 4 | -1.050000 | 7.255431651  | 4.458526970   | -15.603517583 | 0 | 0 | 1 | # | ob  |
| 1185 | 8 | 7 | -0.950000 | 8.354142343  | 8.908159004   | 17.652417115  | 0 | 0 | 0 | # | oh  |
| 1186 | 8 | 4 | -1.050000 | 5.686318349  | 8.905123030   | 15.603517583  | 0 | 0 | 0 | # | ob  |
| 1187 | 8 | 7 | -0.950000 | 5.765792343  | 4.453609004   | 17.652417115  | 0 | 0 | 0 | # | oh  |
| 1188 | 8 | 4 | -1.050000 | 8.274668349  | 4.450573030   | 15.603517583  | 0 | 0 | 0 | # | ob  |
| 1189 | 8 | 4 | -1.050000 | 9.371505513  | 1.680900680   | -17.631368622 | 0 | 0 | 1 | # | ob  |
| 1190 | 8 | 4 | -1.050000 | 5.330210908  | 6.314939700   | -15.431920289 | 0 | 0 | 1 | # | ob  |
| 1191 | 8 | 4 | -1.050000 | 8.746364655  | 6.132051481   | 17.631577932  | 0 | 0 | 0 | # | ob  |
| 1192 | 8 | 4 | -1.050000 | 7.611867264  | 1.850546126   | 15.433153738  | 0 | 0 | 0 | # | ob  |
| 1193 | 8 | 8 | 2.100000  | 9.399697014  | 1.527119204   | -16.002222830 | 0 | 1 | 1 | # | st  |
| 1194 | 8 | 8 | 2.100000  | 8.718727774  | 5.973370782   | 16.003201903  | 0 | 0 | 0 | # | st  |
| 1195 | 8 | 8 | 2.100000  | 6.130402986  | 7.381980796   | 16.002222830  | 0 | 0 | 0 | # | st  |
| 1196 | 8 | 8 | 2.100000  | 8.718752986  | 2.927430796   | 16.002222830  | 0 | 0 | 0 | # | st  |
| 1197 | 8 | 8 | 2.100000  | 9.399722226  | 7.390279218   | -16.003201903 | 0 | 0 | 1 | # | st  |
| 1198 | 8 | 8 | 2.100000  | 6.811372226  | 2.935729218   | -16.003201903 | 0 | 0 | 1 | # | st  |
| 1199 | 8 | 8 | 2.100000  | 6.811347014  | 5.981669204   | -16.002222830 | 0 | 0 | 1 | # | st  |
| 1200 | 8 | 8 | 2.100000  | 6.130377774  | 1.518820782   | 16.003201903  | 0 | 0 | 0 | # | st  |
| 1201 | 8 | 1 | 1.575000  | 7.765255029  | 10.383761568  | -18.664729368 | 0 | 0 | 1 | # | ao  |

|      |   |   |           |              |               |               |   |   |   |   |    |
|------|---|---|-----------|--------------|---------------|---------------|---|---|---|---|----|
| 1202 | 8 | 1 | 1.575000  | 5.176905029  | 14.838311568  | -18.664729368 | 0 | 0 | 1 | # | ao |
| 1203 | 8 | 1 | 1.575000  | 7.764844971  | 16.343538432  | 18.664729368  | 0 | 0 | 0 | 0 | ao |
| 1204 | 8 | 1 | 1.575000  | 10.353194971 | 11.888988432  | 18.664729368  | 0 | 0 | 0 | 0 | ao |
| 1205 | 8 | 2 | 0.425000  | 8.911350872  | 13.366367322  | -17.178884937 | 0 | 0 | 1 | # | ho |
| 1206 | 8 | 2 | 0.425000  | 6.323000872  | 8.911817322   | -17.178884937 | 0 | 0 | 1 | # | ho |
| 1207 | 8 | 2 | 0.425000  | 6.618749128  | 13.360932678  | 17.178884937  | 0 | 0 | 0 | 0 | ho |
| 1208 | 8 | 2 | 0.425000  | 9.207099128  | 17.815482678  | 17.178884937  | 0 | 0 | 0 | 0 | ho |
| 1209 | 8 | 4 | -1.050000 | 6.158014655  | 10.586601481  | 17.631577932  | 0 | 0 | 0 | 0 | ob |
| 1210 | 8 | 4 | -1.050000 | 10.200217264 | 15.214196126  | 15.433153738  | 0 | 0 | 0 | 0 | ob |
| 1211 | 8 | 4 | -1.050000 | 8.746944487  | 11.682749320  | 17.631368622  | 0 | 0 | 0 | 0 | ob |
| 1212 | 8 | 4 | -1.050000 | 7.611539092  | 15.957810300  | 15.431920289  | 0 | 0 | 0 | 0 | ob |
| 1213 | 8 | 4 | -1.050000 | 6.158594487  | 16.137299320  | 17.631368622  | 0 | 0 | 0 | 0 | ob |
| 1214 | 8 | 4 | -1.050000 | 6.783155513  | 15.044550680  | -17.631368622 | 0 | 0 | 1 | # | ob |
| 1215 | 8 | 4 | -1.050000 | 10.199889092 | 11.503260300  | 15.431920289  | 0 | 0 | 0 | 0 | ob |
| 1216 | 8 | 4 | -1.050000 | 6.783735345  | 11.686148519  | -17.631577932 | 0 | 0 | 1 | # | ob |
| 1217 | 8 | 4 | -1.050000 | 7.918232736  | 15.967653874  | -15.433153738 | 0 | 0 | 1 | # | ob |
| 1218 | 8 | 4 | -1.050000 | 9.372085345  | 16.140698519  | -17.631577932 | 0 | 0 | 1 | # | ob |
| 1219 | 8 | 4 | -1.050000 | 5.329882736  | 11.513103874  | -15.433153738 | 0 | 0 | 1 | # | ob |
| 1220 | 8 | 4 | -1.050000 | 7.918560908  | 10.769489700  | -15.431920289 | 0 | 0 | 1 | # | ob |
| 1221 | 8 | 7 | -0.950000 | 7.175957657  | 8.910040996   | -17.652417115 | 0 | 0 | 1 | # | oh |
| 1222 | 8 | 4 | -1.050000 | 9.843781651  | 8.913076970   | -15.603517583 | 0 | 0 | 1 | # | ob |
| 1223 | 8 | 7 | -0.950000 | 9.764307657  | 13.364590996  | -17.652417115 | 0 | 0 | 1 | # | oh |
| 1224 | 8 | 4 | -1.050000 | 7.255431651  | 13.367626970  | -15.603517583 | 0 | 0 | 1 | # | ob |
| 1225 | 8 | 7 | -0.950000 | 8.354142343  | 17.817259004  | 17.652417115  | 0 | 0 | 0 | 0 | oh |
| 1226 | 8 | 4 | -1.050000 | 5.686318349  | 17.814223030  | 15.603517583  | 0 | 0 | 0 | 0 | ob |
| 1227 | 8 | 7 | -0.950000 | 5.765792343  | 13.362709004  | 17.652417115  | 0 | 0 | 0 | 0 | oh |
| 1228 | 8 | 4 | -1.050000 | 8.274668349  | 13.359673030  | 15.603517583  | 0 | 0 | 0 | 0 | ob |
| 1229 | 8 | 4 | -1.050000 | 9.371505513  | 10.590000680  | -17.631368622 | 0 | 0 | 1 | # | ob |
| 1230 | 8 | 4 | -1.050000 | 5.330210908  | 15.224039700  | -15.431920289 | 0 | 0 | 1 | # | ob |
| 1231 | 8 | 4 | -1.050000 | 8.746364655  | 15.041151481  | 17.631577932  | 0 | 0 | 0 | 0 | ob |
| 1232 | 8 | 4 | -1.050000 | 7.611867264  | 10.759646126  | 15.433153738  | 0 | 0 | 0 | 0 | ob |
| 1233 | 8 | 8 | 2.100000  | 9.399697014  | 10.436219204  | -16.00222830  | 0 | 0 | 1 | # | st |
| 1234 | 8 | 8 | 2.100000  | 8.718727774  | 14.882470782  | 16.003201903  | 0 | 0 | 0 | 0 | st |
| 1235 | 8 | 8 | 2.100000  | 6.130402986  | 16.291080796  | 16.00222830   | 0 | 0 | 0 | 0 | st |
| 1236 | 8 | 8 | 2.100000  | 8.718752986  | 11.836530796  | 16.00222830   | 0 | 0 | 0 | 0 | st |
| 1237 | 8 | 8 | 2.100000  | 9.399722226  | 16.299379218  | -16.003201903 | 0 | 0 | 1 | # | st |
| 1238 | 8 | 8 | 2.100000  | 6.811372226  | 11.844829218  | -16.003201903 | 0 | 0 | 1 | # | st |
| 1239 | 8 | 8 | 2.100000  | 6.811347014  | 14.890769204  | -16.00222830  | 0 | 0 | 1 | # | st |
| 1240 | 8 | 8 | 2.100000  | 6.130377774  | 10.427920782  | 16.003201903  | 0 | 0 | 0 | 0 | st |
| 1241 | 8 | 1 | 1.575000  | 7.765255029  | 19.292861568  | -18.664729368 | 0 | 0 | 1 | # | ao |
| 1242 | 8 | 1 | 1.575000  | 5.176905029  | 23.747411568  | -18.664729368 | 0 | 0 | 1 | # | ao |
| 1243 | 8 | 1 | 1.575000  | 7.764844971  | 25.252638432  | 18.664729368  | 0 | 0 | 0 | 0 | ao |
| 1244 | 8 | 1 | 1.575000  | 10.353194971 | 20.798088432  | 18.664729368  | 0 | 0 | 0 | 0 | ao |
| 1245 | 8 | 2 | 0.425000  | 8.911350872  | 22.275467322  | -17.178884937 | 0 | 0 | 1 | # | ho |
| 1246 | 8 | 2 | 0.425000  | 6.323000872  | 17.820917322  | -17.178884937 | 0 | 0 | 1 | # | ho |
| 1247 | 8 | 2 | 0.425000  | 6.618749128  | 22.270032678  | 17.178884937  | 0 | 0 | 0 | 0 | ho |
| 1248 | 8 | 2 | 0.425000  | 9.207099128  | 26.724582678  | 17.178884937  | 0 | 0 | 0 | 0 | ho |
| 1249 | 8 | 4 | -1.050000 | 6.158014655  | 19.495701481  | 17.631577932  | 0 | 0 | 0 | 0 | ob |
| 1250 | 8 | 4 | -1.050000 | 10.200217264 | 24.123296126  | 15.433153738  | 0 | 0 | 0 | 0 | ob |
| 1251 | 8 | 4 | -1.050000 | 8.746944487  | 20.591849320  | 17.631368622  | 0 | 0 | 0 | 0 | ob |
| 1252 | 8 | 4 | -1.050000 | 7.611539092  | 24.866910300  | 15.431920289  | 0 | 0 | 0 | 0 | ob |
| 1253 | 8 | 4 | -1.050000 | 6.158594487  | 25.046399320  | 17.631368622  | 0 | 0 | 0 | 0 | ob |
| 1254 | 8 | 4 | -1.050000 | 6.783155513  | 23.953650680  | -17.631368622 | 0 | 0 | 1 | # | ob |
| 1255 | 8 | 4 | -1.050000 | 10.199889092 | 20.412360300  | 15.431920289  | 0 | 0 | 0 | 0 | ob |
| 1256 | 8 | 4 | -1.050000 | 6.783735345  | 20.595248519  | -17.631577932 | 0 | 0 | 1 | # | ob |
| 1257 | 8 | 4 | -1.050000 | 7.918232736  | 24.876753874  | -15.433153738 | 0 | 0 | 1 | # | ob |
| 1258 | 8 | 4 | -1.050000 | 9.372085345  | 25.049798519  | -17.631577932 | 0 | 0 | 1 | # | ob |
| 1259 | 8 | 4 | -1.050000 | 5.329882736  | 20.422203874  | -15.433153738 | 0 | 0 | 1 | # | ob |
| 1260 | 8 | 4 | -1.050000 | 7.918560908  | 19.678589700  | -15.431920289 | 0 | 0 | 1 | # | ob |
| 1261 | 8 | 7 | -0.950000 | 7.175957657  | 17.819140996  | -17.652417115 | 0 | 0 | 1 | # | oh |
| 1262 | 8 | 4 | -1.050000 | 9.843781651  | 17.822176970  | -15.603517583 | 0 | 0 | 1 | # | ob |
| 1263 | 8 | 7 | -0.950000 | 9.764307657  | 22.273690996  | -17.652417115 | 0 | 0 | 1 | # | oh |
| 1264 | 8 | 4 | -1.050000 | 7.255431651  | 22.276726970  | -15.603517583 | 0 | 0 | 1 | # | ob |
| 1265 | 8 | 7 | -0.950000 | 8.354142343  | 26.726359004  | 17.652417115  | 0 | 0 | 0 | 0 | oh |
| 1266 | 8 | 4 | -1.050000 | 5.686318349  | 26.723323030  | 15.603517583  | 0 | 0 | 0 | 0 | ob |
| 1267 | 8 | 7 | -0.950000 | 5.765792343  | 22.271809004  | 17.652417115  | 0 | 0 | 0 | 0 | oh |
| 1268 | 8 | 4 | -1.050000 | 8.274668349  | 22.268773030  | 15.603517583  | 0 | 0 | 0 | 0 | ob |
| 1269 | 8 | 4 | -1.050000 | 9.371505513  | 19.499100680  | -17.631368622 | 0 | 0 | 1 | # | ob |
| 1270 | 8 | 4 | -1.050000 | 5.330210908  | 24.133139700  | -15.431920289 | 0 | 0 | 1 | # | ob |
| 1271 | 8 | 4 | -1.050000 | 8.746364655  | 23.950251481  | 17.631577932  | 0 | 0 | 0 | 0 | ob |
| 1272 | 8 | 4 | -1.050000 | 7.611867264  | 19.668746126  | 15.433153738  | 0 | 0 | 0 | 0 | ob |
| 1273 | 8 | 8 | 2.100000  | 9.399697014  | 19.345319204  | -16.00222830  | 0 | 0 | 1 | # | st |
| 1274 | 8 | 8 | 2.100000  | 8.718727774  | 23.791570782  | 16.003201903  | 0 | 0 | 0 | 0 | st |
| 1275 | 8 | 8 | 2.100000  | 6.130402986  | 25.200180796  | 16.00222830   | 0 | 0 | 0 | 0 | st |
| 1276 | 8 | 8 | 2.100000  | 8.718752986  | 20.745630796  | 16.00222830   | 0 | 0 | 0 | 0 | st |
| 1277 | 8 | 8 | 2.100000  | 9.399722226  | 25.208479218  | -16.003201903 | 0 | 0 | 1 | # | st |
| 1278 | 8 | 8 | 2.100000  | 6.811372226  | 20.753929218  | -16.003201903 | 0 | 0 | 1 | # | st |
| 1279 | 8 | 8 | 2.100000  | 6.811347014  | 23.799869204  | -16.00222830  | 0 | 0 | 1 | # | st |
| 1280 | 8 | 8 | 2.100000  | 6.130377774  | 19.337020782  | 16.003201903  | 0 | 0 | 0 | 0 | st |
| 1281 | 8 | 1 | 1.575000  | 7.765255029  | -27.434438432 | -18.664729368 | 0 | 1 | 1 | # | ao |
| 1282 | 8 | 1 | 1.575000  | 5.176905029  | -22.979888432 | -18.664729368 | 0 | 1 | 1 | # | ao |
| 1283 | 8 | 1 | 1.575000  | 7.764844971  | -21.474661568 | 18.664729368  | 0 | 1 | 0 | 0 | ao |
| 1284 | 8 | 1 | 1.575000  | 10.353194971 | -25.929211568 | 18.664729368  | 0 | 1 | 0 | 0 | ao |
| 1285 | 8 | 2 | 0.425000  | 8.911350872  | -24.451832678 | -17.178884937 | 0 | 1 | 1 | # | ho |
| 1286 | 8 | 2 | 0.425000  | 6.323000872  | 26.730017322  | -17.178884937 | 0 | 0 | 1 | # | ho |
| 1287 | 8 | 2 | 0.425000  | 6.618749128  | -24.457267322 | 17.178884937  | 0 | 1 | 0 | 0 | ho |
| 1288 | 8 | 3 | 0.425000  | 9.207099128  | -20.002717322 | 17.178884937  | 0 | 1 | 0 | 0 | do |
| 1289 | 8 | 4 | -1.050000 | 6.158014655  | -27.231598519 | 17.631577932  | 0 | 1 | 0 | 0 | ob |
| 1290 | 8 | 4 | -1.050000 | 10.200217264 | -22.604003874 | 15.433153738  | 0 | 1 | 0 | 0 | ob |
| 1291 | 8 | 4 | -1.050000 | 8.746944487  | -26.135450680 | 17.631368622  | 0 | 1 | 0 | 0 | ob |
| 1292 | 8 | 4 | -1.050000 | 7.611539092  | -21.860389700 | 15.431920289  | 0 | 1 | 0 | 0 | ob |
| 1293 | 8 | 4 | -1.050000 | 6.158594487  | -21.680900680 | 17.631368622  | 0 | 1 | 0 | 0 | ob |
| 1294 | 8 | 4 | -1.050000 | 6.783155513  | -22.773649320 | -17.631368622 | 0 | 1 | 1 | # | ob |

|      |   |   |           |              |               |               |   |   |   |   |     |
|------|---|---|-----------|--------------|---------------|---------------|---|---|---|---|-----|
| 1295 | 8 | 4 | -1.050000 | 10.199889092 | -26.314939700 | 15.431920289  | 0 | 1 | 0 | # | ob  |
| 1296 | 8 | 4 | -1.050000 | 6.783735345  | -26.132051481 | -17.631577932 | 0 | 1 | 1 | # | ob  |
| 1297 | 8 | 4 | -1.050000 | 7.918232736  | -21.850546126 | -15.433153738 | 0 | 1 | 1 | # | ob  |
| 1298 | 8 | 4 | -1.050000 | 9.372085345  | -21.677501481 | -17.631577932 | 0 | 1 | 1 | # | ob  |
| 1299 | 8 | 4 | -1.050000 | 5.329882736  | -26.305096126 | -15.433153738 | 0 | 1 | 1 | # | ob  |
| 1300 | 8 | 4 | -1.050000 | 7.918560908  | -27.048710300 | -15.431920289 | 0 | 1 | 1 | # | ob  |
| 1301 | 8 | 7 | -0.950000 | 7.175957657  | 26.728240996  | -17.652417115 | 0 | 0 | 1 | # | oh  |
| 1302 | 8 | 4 | -1.050000 | 9.843781651  | 26.731276970  | -15.603517583 | 0 | 0 | 1 | # | ob  |
| 1303 | 8 | 7 | -0.950000 | 9.764307657  | -24.453609004 | -17.652417115 | 0 | 1 | 1 | # | oh  |
| 1304 | 8 | 4 | -1.050000 | 7.255431651  | -24.450573030 | -15.603517583 | 0 | 1 | 1 | # | ob  |
| 1305 | 8 | 5 | -0.950000 | 8.354142343  | -20.000940996 | 17.652417115  | 0 | 1 | 0 | # | oho |
| 1306 | 8 | 6 | -0.950000 | 5.686318349  | -20.003976970 | 15.603517583  | 0 | 1 | 0 | # | oht |
| 1307 | 8 | 7 | -0.950000 | 5.765792343  | -24.455490996 | 17.652417115  | 0 | 1 | 0 | # | oh  |
| 1308 | 8 | 4 | -1.050000 | 8.274668349  | -24.458526970 | 15.603517583  | 0 | 1 | 0 | # | ob  |
| 1309 | 8 | 4 | -1.050000 | 9.371505513  | -27.228199320 | -17.631368622 | 0 | 1 | 1 | # | ob  |
| 1310 | 8 | 4 | -1.050000 | 5.330210908  | -22.594160300 | -15.431920289 | 0 | 1 | 1 | # | ob  |
| 1311 | 8 | 4 | -1.050000 | 8.746364655  | -22.77048519  | 17.631577932  | 0 | 1 | 0 | # | ob  |
| 1312 | 8 | 4 | -1.050000 | 7.611867264  | -27.058553874 | 15.433153738  | 0 | 1 | 0 | # | ob  |
| 1313 | 8 | 8 | 2.100000  | 9.399697014  | -27.381980796 | -16.00222830  | 0 | 1 | 1 | # | st  |
| 1314 | 8 | 8 | 2.100000  | 8.718727774  | -22.935729218 | 16.003201903  | 0 | 1 | 0 | # | st  |
| 1315 | 8 | 8 | 2.100000  | 6.130402986  | -21.527119204 | 16.00222830   | 0 | 1 | 0 | # | st  |
| 1316 | 8 | 8 | 2.100000  | 8.718752986  | -25.981669204 | 16.00222830   | 0 | 1 | 0 | # | st  |
| 1317 | 8 | 8 | 2.100000  | 9.399722226  | -21.518820782 | -16.003201903 | 0 | 1 | 1 | # | st  |
| 1318 | 8 | 8 | 2.100000  | 6.811372226  | -25.973370782 | -16.003201903 | 0 | 1 | 1 | # | st  |
| 1319 | 8 | 8 | 2.100000  | 6.811347014  | -22.927430796 | -16.00222830  | 0 | 1 | 1 | # | st  |
| 1320 | 8 | 8 | 2.100000  | 6.130377774  | -27.390279218 | 16.003201903  | 0 | 1 | 0 | # | st  |
| 1321 | 8 | 6 | -0.950000 | 9.914166427  | -19.680858114 | -6.743779050  | 0 | 1 | 1 | # | oht |
| 1322 | 8 | 6 | -0.950000 | 5.481638203  | -0.272172439  | -12.134227113 | 0 | 0 | 1 | # | oht |
| 1323 | 8 | 3 | 0.425000  | 5.133272253  | -1.308055357  | -12.328360493 | 0 | 0 | 1 | # | do  |
| 1324 | 8 | 3 | 0.425000  | 10.176688619 | -1.054326608  | -6.235429463  | 0 | 0 | 1 | # | do  |
| 1325 | 8 | 3 | 0.425000  | 10.040548964 | -18.596754758 | -6.945886456  | 0 | 1 | 1 | # | do  |
| 1326 | 8 | 3 | 0.425000  | 5.289748915  | -19.012312375 | -12.696363051 | 0 | 1 | 1 | # | do  |
| 1327 | 9 | 1 | 1.575000  | 12.941955029 | 1.474661568   | -18.664729368 | 0 | 0 | 1 | # | ao  |
| 1328 | 9 | 1 | 1.575000  | 10.353605029 | 5.929211568   | -18.664729368 | 0 | 0 | 1 | # | ao  |
| 1329 | 9 | 1 | 1.575000  | 12.941544971 | 7.434438432   | 18.664729368  | 0 | 0 | 0 | # | ao  |
| 1330 | 9 | 1 | 1.575000  | 15.529894971 | 2.979888432   | 18.664729368  | 0 | 0 | 0 | # | ao  |
| 1331 | 9 | 2 | 0.425000  | 14.088050872 | 4.457267322   | -17.178884937 | 0 | 0 | 1 | # | ho  |
| 1332 | 9 | 3 | 0.425000  | 11.499700872 | 0.002717322   | -17.178884937 | 0 | 0 | 1 | # | do  |
| 1333 | 9 | 2 | 0.425000  | 11.795449128 | 4.451832678   | 17.178884937  | 0 | 0 | 0 | # | ho  |
| 1334 | 9 | 2 | 0.425000  | 14.383799128 | 8.906382678   | 17.178884937  | 0 | 0 | 0 | # | ho  |
| 1335 | 9 | 4 | -1.050000 | 11.334714655 | 1.677501481   | 17.631577932  | 0 | 0 | 0 | # | ob  |
| 1336 | 9 | 4 | -1.050000 | 15.376917264 | 6.305096126   | 15.433153738  | 0 | 0 | 0 | # | ob  |
| 1337 | 9 | 4 | -1.050000 | 13.923644487 | 2.773649320   | 17.631368622  | 0 | 0 | 0 | # | ob  |
| 1338 | 9 | 4 | -1.050000 | 12.788239092 | 7.048710300   | 15.431920289  | 0 | 0 | 0 | # | ob  |
| 1339 | 9 | 4 | -1.050000 | 11.335294487 | 7.228199320   | 17.631368622  | 0 | 0 | 0 | # | ob  |
| 1340 | 9 | 4 | -1.050000 | 11.959855513 | 6.135450680   | -17.631368622 | 0 | 0 | 1 | # | ob  |
| 1341 | 9 | 4 | -1.050000 | 15.376589092 | 2.594160300   | 15.431920289  | 0 | 0 | 0 | # | ob  |
| 1342 | 9 | 4 | -1.050000 | 11.960435345 | 2.777048519   | -17.631577932 | 0 | 0 | 1 | # | ob  |
| 1343 | 9 | 4 | -1.050000 | 13.094932736 | 7.058553874   | -15.433153738 | 0 | 0 | 1 | # | ob  |
| 1344 | 9 | 4 | -1.050000 | 14.548785345 | 7.231598519   | -17.631577932 | 0 | 0 | 1 | # | ob  |
| 1345 | 9 | 4 | -1.050000 | 10.506582736 | 2.604003874   | -15.433153738 | 0 | 0 | 1 | # | ob  |
| 1346 | 9 | 4 | -1.050000 | 13.095260908 | 1.860389700   | -15.431920289 | 0 | 0 | 1 | # | ob  |
| 1347 | 9 | 5 | -0.950000 | 12.352657657 | 0.000940996   | -17.652417115 | 0 | 0 | 1 | # | oho |
| 1348 | 9 | 6 | -0.950000 | 15.020481651 | 0.003976970   | -15.603517583 | 0 | 0 | 1 | # | oht |
| 1349 | 9 | 7 | -0.950000 | 14.941007657 | 4.455490996   | -17.652417115 | 0 | 0 | 1 | # | oh  |
| 1350 | 9 | 4 | -1.050000 | 12.432131651 | 4.458526970   | -15.603517583 | 0 | 0 | 1 | # | ob  |
| 1351 | 9 | 7 | -0.950000 | 13.530842343 | 8.908159004   | 17.652417115  | 0 | 0 | 0 | # | oh  |
| 1352 | 9 | 4 | -1.050000 | 10.863018349 | 8.905123030   | 15.603517583  | 0 | 0 | 0 | # | ob  |
| 1353 | 9 | 7 | -0.950000 | 10.942492343 | 4.453609004   | 17.652417115  | 0 | 0 | 0 | # | oh  |
| 1354 | 9 | 4 | -1.050000 | 13.451368349 | 4.450573030   | 15.603517583  | 0 | 0 | 0 | # | ob  |
| 1355 | 9 | 4 | -1.050000 | 14.548205513 | 1.680900680   | -17.631368622 | 0 | 0 | 1 | # | ob  |
| 1356 | 9 | 4 | -1.050000 | 10.506910908 | 6.314939700   | -15.431920289 | 0 | 0 | 1 | # | ob  |
| 1357 | 9 | 4 | -1.050000 | 13.923064655 | 6.132051481   | 17.631577932  | 0 | 0 | 0 | # | ob  |
| 1358 | 9 | 4 | -1.050000 | 12.788567264 | 1.850546126   | 15.433153738  | 0 | 0 | 0 | # | ob  |
| 1359 | 9 | 8 | 2.100000  | 14.576397014 | 1.527119204   | -16.00222830  | 0 | 0 | 1 | # | st  |
| 1360 | 9 | 8 | 2.100000  | 13.895427774 | 5.973370782   | 16.003201903  | 0 | 0 | 0 | # | st  |
| 1361 | 9 | 8 | 2.100000  | 11.307102986 | 7.381980796   | 16.00222830   | 0 | 0 | 0 | # | st  |
| 1362 | 9 | 8 | 2.100000  | 13.895452986 | 2.927430796   | 16.00222830   | 0 | 0 | 0 | # | st  |
| 1363 | 9 | 8 | 2.100000  | 14.576422226 | 7.390279218   | -16.003201903 | 0 | 0 | 1 | # | st  |
| 1364 | 9 | 8 | 2.100000  | 11.988072226 | 2.935729218   | -16.003201903 | 0 | 0 | 1 | # | st  |
| 1365 | 9 | 8 | 2.100000  | 11.988047014 | 5.981669204   | -16.00222830  | 0 | 0 | 1 | # | st  |
| 1366 | 9 | 8 | 2.100000  | 11.307077774 | 1.518820782   | 16.003201903  | 0 | 0 | 0 | # | st  |
| 1367 | 9 | 1 | 1.575000  | 12.941955029 | 10.383761568  | -18.664729368 | 0 | 0 | 1 | # | ao  |
| 1368 | 9 | 1 | 1.575000  | 10.353605029 | 14.838311568  | -18.664729368 | 0 | 0 | 1 | # | ao  |
| 1369 | 9 | 1 | 1.575000  | 12.941544971 | 16.343538432  | 18.664729368  | 0 | 0 | 0 | # | ao  |
| 1370 | 9 | 1 | 1.575000  | 15.529894971 | 11.888988432  | 18.664729368  | 0 | 0 | 0 | # | ao  |
| 1371 | 9 | 2 | 0.425000  | 14.088050872 | 13.366367322  | -17.178884937 | 0 | 0 | 1 | # | ho  |
| 1372 | 9 | 2 | 0.425000  | 11.499700872 | 8.911817322   | -17.178884937 | 0 | 0 | 1 | # | ho  |
| 1373 | 9 | 2 | 0.425000  | 11.795449128 | 13.360932678  | 17.178884937  | 0 | 0 | 0 | # | ho  |
| 1374 | 9 | 2 | 0.425000  | 14.383799128 | 17.815482678  | 17.178884937  | 0 | 0 | 0 | # | ho  |
| 1375 | 9 | 4 | -1.050000 | 11.334714655 | 10.586601481  | 17.631577932  | 0 | 0 | 0 | # | ob  |
| 1376 | 9 | 4 | -1.050000 | 15.376917264 | 15.214196126  | 15.433153738  | 0 | 0 | 0 | # | ob  |
| 1377 | 9 | 4 | -1.050000 | 13.923644487 | 11.682749320  | 17.631368622  | 0 | 0 | 0 | # | ob  |
| 1378 | 9 | 4 | -1.050000 | 12.788239092 | 15.957810300  | 15.431920289  | 0 | 0 | 0 | # | ob  |
| 1379 | 9 | 4 | -1.050000 | 11.335294487 | 16.137299320  | 17.631368622  | 0 | 0 | 0 | # | ob  |
| 1380 | 9 | 4 | -1.050000 | 11.959855513 | 15.044550680  | -17.631368622 | 0 | 0 | 1 | # | ob  |
| 1381 | 9 | 4 | -1.050000 | 15.376589092 | 11.503260300  | 15.431920289  | 0 | 0 | 0 | # | ob  |
| 1382 | 9 | 4 | -1.050000 | 11.960435345 | 11.686148519  | -17.631577932 | 0 | 0 | 1 | # | ob  |
| 1383 | 9 | 4 | -1.050000 | 13.094932736 | 15.967653874  | -15.433153738 | 0 | 0 | 1 | # | ob  |
| 1384 | 9 | 4 | -1.050000 | 14.548785345 | 16.140698519  | -17.631577932 | 0 | 0 | 1 | # | ob  |
| 1385 | 9 | 4 | -1.050000 | 10.506582736 | 11.513103874  | -15.433153738 | 0 | 0 | 1 | # | ob  |
| 1386 | 9 | 4 | -1.050000 | 13.095260908 | 10.769489700  | -15.431920289 | 0 | 0 | 1 | # | ob  |
| 1387 | 9 | 7 | -0.950000 | 12.352657657 | 8.910040996   | -17.652417115 | 0 | 0 | 1 | # | oh  |



|      |   |   |           |              |               |               |   |   |   |   |     |
|------|---|---|-----------|--------------|---------------|---------------|---|---|---|---|-----|
| 1388 | 9 | 4 | -1.050000 | 15.020481651 | 8.913076970   | -15.603517583 | 0 | 0 | 1 | # | ob  |
| 1389 | 9 | 7 | -0.950000 | 14.941007657 | 13.364590996  | -17.652417115 | 0 | 0 | 1 | # | oh  |
| 1390 | 9 | 4 | -1.050000 | 12.432131651 | 13.367626970  | -15.603517583 | 0 | 0 | 1 | # | ob  |
| 1391 | 9 | 7 | -0.950000 | 13.530842343 | 17.817259004  | 17.652417115  | 0 | 0 | 0 | # | oh  |
| 1392 | 9 | 4 | -1.050000 | 10.863018349 | 17.814223030  | 15.603517583  | 0 | 0 | 0 | # | ob  |
| 1393 | 9 | 7 | -0.950000 | 10.942492343 | 13.362709004  | 17.652417115  | 0 | 0 | 0 | # | oh  |
| 1394 | 9 | 4 | -1.050000 | 13.451368349 | 13.359673030  | 15.603517583  | 0 | 0 | 0 | # | ob  |
| 1395 | 9 | 4 | -1.050000 | 14.548205513 | 10.590000680  | -17.631368622 | 0 | 0 | 1 | # | ob  |
| 1396 | 9 | 4 | -1.050000 | 10.506910908 | 15.224039700  | -15.431920289 | 0 | 0 | 1 | # | ob  |
| 1397 | 9 | 4 | -1.050000 | 13.923064655 | 15.041151481  | 17.631577932  | 0 | 0 | 0 | # | ob  |
| 1398 | 9 | 4 | -1.050000 | 12.788567264 | 10.759646126  | 15.433153738  | 0 | 0 | 0 | # | ob  |
| 1399 | 9 | 8 | 2.100000  | 14.576397014 | 10.436219204  | -16.002222830 | 0 | 0 | 1 | # | st  |
| 1400 | 9 | 8 | 2.100000  | 13.895427774 | 14.882470782  | 16.003201903  | 0 | 0 | 0 | # | st  |
| 1401 | 9 | 8 | 2.100000  | 11.307102986 | 16.291080796  | 16.002222830  | 0 | 0 | 0 | # | st  |
| 1402 | 9 | 8 | 2.100000  | 13.895452986 | 11.836530796  | 16.002222830  | 0 | 0 | 0 | # | st  |
| 1403 | 9 | 8 | 2.100000  | 14.576422226 | 16.299379218  | -16.003201903 | 0 | 0 | 1 | # | st  |
| 1404 | 9 | 8 | 2.100000  | 11.988072226 | 11.844829218  | -16.003201903 | 0 | 0 | 1 | # | st  |
| 1405 | 9 | 8 | 2.100000  | 11.988047014 | 14.890769204  | -16.002222830 | 0 | 0 | 1 | # | st  |
| 1406 | 9 | 8 | 2.100000  | 11.307077774 | 10.427920782  | 16.003201903  | 0 | 0 | 0 | # | st  |
| 1407 | 9 | 1 | 1.575000  | 12.941955029 | 19.292861568  | -18.664729368 | 0 | 0 | 1 | # | ao  |
| 1408 | 9 | 1 | 1.575000  | 10.353605029 | 23.747411568  | -18.664729368 | 0 | 0 | 1 | # | ao  |
| 1409 | 9 | 1 | 1.575000  | 12.941544971 | 25.252638432  | 18.664729368  | 0 | 0 | 0 | # | ao  |
| 1410 | 9 | 1 | 1.575000  | 15.529894971 | 20.798088432  | 18.664729368  | 0 | 0 | 0 | # | ao  |
| 1411 | 9 | 2 | 0.425000  | 14.088050872 | 22.275467322  | -17.178884937 | 0 | 0 | 1 | # | ho  |
| 1412 | 9 | 2 | 0.425000  | 11.499700872 | 17.820917322  | -17.178884937 | 0 | 0 | 1 | # | ho  |
| 1413 | 9 | 2 | 0.425000  | 11.795449128 | 22.270032678  | 17.178884937  | 0 | 0 | 0 | # | ho  |
| 1414 | 9 | 2 | 0.425000  | 14.383799128 | 26.724582678  | 17.178884937  | 0 | 0 | 0 | # | ho  |
| 1415 | 9 | 4 | -1.050000 | 11.334714655 | 19.495701481  | 17.631577932  | 0 | 0 | 0 | # | ob  |
| 1416 | 9 | 4 | -1.050000 | 15.376917264 | 24.123296126  | 15.433153738  | 0 | 0 | 0 | # | ob  |
| 1417 | 9 | 4 | -1.050000 | 13.923644487 | 20.591849320  | 17.631368622  | 0 | 0 | 0 | # | ob  |
| 1418 | 9 | 4 | -1.050000 | 12.788239092 | 24.866910300  | 15.431920289  | 0 | 0 | 0 | # | ob  |
| 1419 | 9 | 4 | -1.050000 | 11.335294487 | 25.046399320  | 17.631368622  | 0 | 0 | 0 | # | ob  |
| 1420 | 9 | 4 | -1.050000 | 11.959855513 | 23.953650680  | -17.631368622 | 0 | 0 | 1 | # | ob  |
| 1421 | 9 | 4 | -1.050000 | 15.376589092 | 20.412360300  | 15.431920289  | 0 | 0 | 0 | # | ob  |
| 1422 | 9 | 4 | -1.050000 | 11.960435345 | 20.595248519  | -17.631577932 | 0 | 0 | 1 | # | ob  |
| 1423 | 9 | 4 | -1.050000 | 13.094932736 | 24.876753874  | -15.433153738 | 0 | 0 | 1 | # | ob  |
| 1424 | 9 | 4 | -1.050000 | 14.548785345 | 25.049798519  | -17.631577932 | 0 | 0 | 1 | # | ob  |
| 1425 | 9 | 4 | -1.050000 | 10.506582736 | 20.422203874  | -15.433153738 | 0 | 0 | 1 | # | ob  |
| 1426 | 9 | 4 | -1.050000 | 13.095260908 | 19.678589700  | -15.431920289 | 0 | 0 | 1 | # | ob  |
| 1427 | 9 | 7 | -0.950000 | 12.352657657 | 17.819140996  | -17.652417115 | 0 | 0 | 1 | # | oh  |
| 1428 | 9 | 4 | -1.050000 | 15.020481651 | 17.822176970  | -15.603517583 | 0 | 0 | 1 | # | ob  |
| 1429 | 9 | 7 | -0.950000 | 14.941007657 | 22.273690996  | -17.652417115 | 0 | 0 | 1 | # | oh  |
| 1430 | 9 | 4 | -1.050000 | 12.432131651 | 22.276726970  | -15.603517583 | 0 | 0 | 1 | # | ob  |
| 1431 | 9 | 7 | -0.950000 | 13.530842343 | 26.726359004  | 17.652417115  | 0 | 0 | 0 | # | oh  |
| 1432 | 9 | 4 | -1.050000 | 10.863018349 | 26.723323030  | 15.603517583  | 0 | 0 | 0 | # | ob  |
| 1433 | 9 | 7 | -0.950000 | 10.942492343 | 22.271809004  | 17.652417115  | 0 | 0 | 0 | # | oh  |
| 1434 | 9 | 4 | -1.050000 | 13.451368349 | 22.268773030  | 15.603517583  | 0 | 0 | 0 | # | ob  |
| 1435 | 9 | 4 | -1.050000 | 14.548205513 | 19.499100680  | -17.631368622 | 0 | 0 | 1 | # | ob  |
| 1436 | 9 | 4 | -1.050000 | 10.506910908 | 24.133139700  | -15.431920289 | 0 | 0 | 1 | # | ob  |
| 1437 | 9 | 4 | -1.050000 | 13.923064655 | 23.950251481  | 17.631577932  | 0 | 0 | 0 | # | ob  |
| 1438 | 9 | 4 | -1.050000 | 12.788567264 | 19.668746126  | 15.433153738  | 0 | 0 | 0 | # | ob  |
| 1439 | 9 | 8 | 2.100000  | 14.576397014 | 19.345319204  | -16.002222830 | 0 | 0 | 1 | # | st  |
| 1440 | 9 | 8 | 2.100000  | 13.895427774 | 23.791570782  | 16.003201903  | 0 | 0 | 0 | # | st  |
| 1441 | 9 | 8 | 2.100000  | 11.307102986 | 25.200180796  | 16.002222830  | 0 | 0 | 0 | # | st  |
| 1442 | 9 | 8 | 2.100000  | 13.895452986 | 20.745630796  | 16.002222830  | 0 | 0 | 0 | # | st  |
| 1443 | 9 | 8 | 2.100000  | 14.576422226 | 25.208479218  | -16.003201903 | 0 | 0 | 1 | # | st  |
| 1444 | 9 | 8 | 2.100000  | 11.988072226 | 20.753929218  | -16.003201903 | 0 | 0 | 1 | # | st  |
| 1445 | 9 | 8 | 2.100000  | 11.988047014 | 23.799869204  | -16.002222830 | 0 | 0 | 1 | # | st  |
| 1446 | 9 | 8 | 2.100000  | 11.307077774 | 19.337020782  | 16.003201903  | 0 | 0 | 0 | # | st  |
| 1447 | 9 | 1 | 1.575000  | 12.941955029 | -27.434438432 | -18.664729368 | 0 | 1 | 1 | # | ao  |
| 1448 | 9 | 1 | 1.575000  | 10.353605029 | -22.979888432 | -18.664729368 | 0 | 1 | 1 | # | ao  |
| 1449 | 9 | 1 | 1.575000  | 12.941544971 | -21.474661568 | 18.664729368  | 0 | 1 | 0 | # | ao  |
| 1450 | 9 | 1 | 1.575000  | 15.529894971 | -25.929211568 | 18.664729368  | 0 | 0 | 0 | # | ao  |
| 1451 | 9 | 2 | 0.425000  | 14.088050872 | -24.451832678 | -17.178884937 | 0 | 1 | 1 | # | ho  |
| 1452 | 9 | 2 | 0.425000  | 11.499700872 | 26.730017322  | -17.178884937 | 0 | 0 | 1 | # | ho  |
| 1453 | 9 | 2 | 0.425000  | 11.795449128 | -24.457267322 | 17.178884937  | 0 | 1 | 0 | # | ho  |
| 1454 | 9 | 3 | 0.425000  | 14.383799128 | -20.002717322 | 17.178884937  | 0 | 1 | 0 | # | do  |
| 1455 | 9 | 4 | -1.050000 | 11.334714655 | -27.231598519 | 17.631577932  | 0 | 1 | 0 | # | ob  |
| 1456 | 9 | 4 | -1.050000 | 15.376917264 | -22.604003874 | 15.433153738  | 0 | 1 | 0 | # | ob  |
| 1457 | 9 | 4 | -1.050000 | 13.923644487 | -26.135450680 | 17.631368622  | 0 | 1 | 0 | # | ob  |
| 1458 | 9 | 4 | -1.050000 | 12.788239092 | -21.860389700 | 15.431920289  | 0 | 1 | 0 | # | ob  |
| 1459 | 9 | 4 | -1.050000 | 11.335294487 | -21.680900680 | 17.631368622  | 0 | 1 | 0 | # | ob  |
| 1460 | 9 | 4 | -1.050000 | 11.959855513 | -22.773649320 | -17.631368622 | 0 | 1 | 1 | # | ob  |
| 1461 | 9 | 4 | -1.050000 | 15.376589092 | -26.314939700 | 15.431920289  | 0 | 1 | 0 | # | ob  |
| 1462 | 9 | 4 | -1.050000 | 11.960435345 | -26.132051481 | -17.631577932 | 0 | 1 | 1 | # | ob  |
| 1463 | 9 | 4 | -1.050000 | 13.094932736 | -21.850546126 | -15.433153738 | 0 | 1 | 1 | # | ob  |
| 1464 | 9 | 4 | -1.050000 | 14.548785345 | -21.677501481 | -17.631577932 | 0 | 1 | 1 | # | ob  |
| 1465 | 9 | 4 | -1.050000 | 10.506582736 | -26.305096126 | -15.433153738 | 0 | 1 | 1 | # | ob  |
| 1466 | 9 | 4 | -1.050000 | 13.095260908 | -27.048710300 | -15.431920289 | 0 | 1 | 1 | # | ob  |
| 1467 | 9 | 7 | -0.950000 | 12.352657657 | 26.728240996  | -17.652417115 | 0 | 0 | 1 | # | oh  |
| 1468 | 9 | 4 | -1.050000 | 15.020481651 | 26.731276970  | -15.603517583 | 0 | 0 | 1 | # | ob  |
| 1469 | 9 | 7 | -0.950000 | 14.941007657 | -24.453609004 | -17.652417115 | 0 | 1 | 1 | # | oh  |
| 1470 | 9 | 4 | -1.050000 | 12.432131651 | -24.450573030 | -15.603517583 | 0 | 1 | 1 | # | ob  |
| 1471 | 9 | 5 | -0.950000 | 13.530842343 | -20.000940996 | 17.652417115  | 0 | 1 | 0 | # | oho |
| 1472 | 9 | 6 | -0.950000 | 10.863018349 | -20.003976970 | 15.603517583  | 0 | 1 | 0 | # | oht |
| 1473 | 9 | 7 | -0.950000 | 10.942492343 | -24.455490996 | 17.652417115  | 0 | 1 | 0 | # | oh  |
| 1474 | 9 | 4 | -1.050000 | 13.451368349 | -24.458526970 | 15.603517583  | 0 | 1 | 0 | # | ob  |
| 1475 | 9 | 4 | -1.050000 | 14.548205513 | -27.228199320 | -17.631368622 | 0 | 1 | 1 | # | ob  |
| 1476 | 9 | 4 | -1.050000 | 10.506910908 | -22.594160300 | -15.431920289 | 0 | 1 | 1 | # | ob  |
| 1477 | 9 | 4 | -1.050000 | 13.923064655 | -22.777048519 | 17.631577932  | 0 | 1 | 0 | # | ob  |
| 1478 | 9 | 4 | -1.050000 | 12.788567264 | -27.058553874 | 15.433153738  | 0 | 1 | 0 | # | ob  |
| 1479 | 9 | 8 | 2.100000  | 14.576397014 | -27.381980796 | -16.002222830 | 0 | 1 | 1 | # | st  |
| 1480 | 9 | 8 | 2.100000  | 13.895427774 | -22.935729218 | 16.003201903  | 0 | 1 | 0 | # | st  |

|      |    |   |           |               |               |               |   |   |   |   |     |
|------|----|---|-----------|---------------|---------------|---------------|---|---|---|---|-----|
| 1481 | 9  | 8 | 2.100000  | 11.307102986  | -21.527119204 | 16.002222830  | 0 | 1 | 0 | # | st  |
| 1482 | 9  | 8 | 2.100000  | 13.895452986  | -25.981669204 | 16.002222830  | 0 | 1 | 0 | # | st  |
| 1483 | 9  | 8 | 2.100000  | 14.576422226  | -21.518820782 | -16.003201903 | 0 | 1 | 1 | # | st  |
| 1484 | 9  | 8 | 2.100000  | 11.988072226  | -25.973370782 | -16.003201903 | 0 | 1 | 1 | # | st  |
| 1485 | 9  | 8 | 2.100000  | 11.988047014  | -22.927430796 | -16.002222830 | 0 | 1 | 1 | # | st  |
| 1486 | 9  | 8 | 2.100000  | 11.307077774  | -27.390279218 | 16.003201903  | 0 | 1 | 0 | # | st  |
| 1487 | 9  | 6 | -0.950000 | 15.090866427  | -19.680858114 | -6.743779050  | 0 | 1 | 1 | # | oht |
| 1488 | 9  | 6 | -0.950000 | 10.658338203  | -0.272172439  | -12.134227113 | 0 | 0 | 1 | # | oht |
| 1489 | 9  | 3 | 0.425000  | 10.309972253  | -1.308055357  | -12.328360493 | 0 | 0 | 1 | # | do  |
| 1490 | 9  | 3 | 0.425000  | 15.353388619  | -1.054326608  | -6.235429463  | 0 | 0 | 1 | # | do  |
| 1491 | 9  | 3 | 0.425000  | 15.217248964  | -18.596754758 | -6.945886456  | 0 | 1 | 1 | # | do  |
| 1492 | 9  | 3 | 0.425000  | 10.466448915  | -19.012312375 | -12.696363051 | 0 | 1 | 1 | # | do  |
| 1493 | 10 | 1 | 1.575000  | -12.941544971 | 1.474661568   | -18.664729368 | 1 | 0 | 1 | # | ao  |
| 1494 | 10 | 1 | 1.575000  | -15.529894971 | 5.929211568   | -18.664729368 | 1 | 0 | 1 | # | ao  |
| 1495 | 10 | 1 | 1.575000  | -12.941955029 | 7.434438432   | 18.664729368  | 1 | 0 | 0 | # | ao  |
| 1496 | 10 | 1 | 1.575000  | -10.353605029 | 2.979888432   | 18.664729368  | 1 | 0 | 0 | # | ao  |
| 1497 | 10 | 2 | 0.425000  | -11.795449128 | 4.457267322   | -17.178884937 | 1 | 0 | 1 | # | ho  |
| 1498 | 10 | 3 | 0.425000  | -14.383799128 | 0.002717322   | -17.178884937 | 1 | 0 | 1 | # | do  |
| 1499 | 10 | 2 | 0.425000  | -14.088050872 | 4.451832678   | 17.178884937  | 1 | 0 | 0 | # | ho  |
| 1500 | 10 | 2 | 0.425000  | -11.499700872 | 8.906382678   | 17.178884937  | 1 | 0 | 0 | # | ho  |
| 1501 | 10 | 4 | -1.050000 | -14.548785345 | 1.677501481   | 17.631577932  | 1 | 0 | 0 | # | ob  |
| 1502 | 10 | 4 | -1.050000 | -10.506582736 | 6.305096126   | 15.433153738  | 1 | 0 | 0 | # | ob  |
| 1503 | 10 | 4 | -1.050000 | -11.959855513 | 2.773649320   | 17.631368622  | 1 | 0 | 0 | # | ob  |
| 1504 | 10 | 4 | -1.050000 | -13.095260908 | 7.048710300   | 15.431920289  | 1 | 0 | 0 | # | ob  |
| 1505 | 10 | 4 | -1.050000 | -14.548205513 | 7.228199320   | 17.631368622  | 1 | 0 | 0 | # | ob  |
| 1506 | 10 | 4 | -1.050000 | -13.923644487 | 6.135450680   | -17.631368622 | 1 | 0 | 1 | # | ob  |
| 1507 | 10 | 4 | -1.050000 | -10.506910908 | 2.594160300   | 15.431920289  | 1 | 0 | 0 | # | ob  |
| 1508 | 10 | 4 | -1.050000 | -13.923064655 | 2.777048519   | -17.631577932 | 1 | 0 | 1 | # | ob  |
| 1509 | 10 | 4 | -1.050000 | -12.788567264 | 7.058553874   | -15.433153738 | 1 | 0 | 1 | # | ob  |
| 1510 | 10 | 4 | -1.050000 | -11.334714655 | 7.231598519   | -17.631577932 | 1 | 0 | 1 | # | ob  |
| 1511 | 10 | 4 | -1.050000 | -15.376917264 | 2.604003874   | -15.433153738 | 1 | 0 | 1 | # | ob  |
| 1512 | 10 | 4 | -1.050000 | -12.788239092 | 1.860389700   | -15.431920289 | 1 | 0 | 1 | # | ob  |
| 1513 | 10 | 5 | -0.950000 | -13.530842343 | 0.000940996   | -17.652417115 | 1 | 0 | 1 | # | oho |
| 1514 | 10 | 6 | -0.950000 | -10.863018349 | 0.003976970   | -15.603517583 | 1 | 0 | 1 | # | oht |
| 1515 | 10 | 7 | -0.950000 | -10.942492343 | 4.455490996   | -17.652417115 | 1 | 0 | 1 | # | oh  |
| 1516 | 10 | 4 | -1.050000 | -13.451368349 | 4.458526970   | -15.603517583 | 1 | 0 | 1 | # | ob  |
| 1517 | 10 | 7 | -0.950000 | -12.352657657 | 8.908159004   | 17.652417115  | 1 | 0 | 0 | # | oh  |
| 1518 | 10 | 4 | -1.050000 | -15.020481651 | 8.905123030   | 15.603517583  | 1 | 0 | 0 | # | ob  |
| 1519 | 10 | 7 | -0.950000 | -14.941007657 | 4.453609004   | 17.652417115  | 1 | 0 | 0 | # | oh  |
| 1520 | 10 | 4 | -1.050000 | -12.432131651 | 4.450573030   | 15.603517583  | 1 | 0 | 0 | # | ob  |
| 1521 | 10 | 4 | -1.050000 | -11.335294487 | 1.680900680   | -17.631368622 | 1 | 0 | 1 | # | ob  |
| 1522 | 10 | 4 | -1.050000 | -15.376589092 | 6.314939700   | -15.431920289 | 1 | 0 | 1 | # | ob  |
| 1523 | 10 | 4 | -1.050000 | -11.960435345 | 6.132051481   | 17.631577932  | 1 | 0 | 0 | # | ob  |
| 1524 | 10 | 4 | -1.050000 | -13.094932736 | 1.850546126   | 15.433153738  | 1 | 0 | 0 | # | ob  |
| 1525 | 10 | 8 | 2.100000  | -11.307102986 | 1.527119204   | -16.002222830 | 1 | 0 | 1 | # | st  |
| 1526 | 10 | 8 | 2.100000  | -11.988072226 | 5.973370782   | 16.003201903  | 1 | 0 | 0 | # | st  |
| 1527 | 10 | 8 | 2.100000  | -14.576397014 | 7.381980796   | 16.002222830  | 1 | 0 | 0 | # | st  |
| 1528 | 10 | 8 | 2.100000  | -11.988047014 | 2.927430796   | 16.002222830  | 1 | 0 | 0 | # | st  |
| 1529 | 10 | 8 | 2.100000  | -11.307077774 | 7.390279218   | -16.003201903 | 1 | 0 | 1 | # | st  |
| 1530 | 10 | 8 | 2.100000  | -13.895427774 | 2.935729218   | -16.003201903 | 1 | 0 | 1 | # | st  |
| 1531 | 10 | 8 | 2.100000  | -13.895452986 | 5.981669204   | -16.002222830 | 1 | 0 | 1 | # | st  |
| 1532 | 10 | 8 | 2.100000  | -14.576422226 | 1.518820782   | 16.003201903  | 1 | 0 | 0 | # | st  |
| 1533 | 10 | 1 | 1.575000  | -12.941544971 | 10.383761568  | -18.664729368 | 1 | 0 | 1 | # | ao  |
| 1534 | 10 | 1 | 1.575000  | -15.529894971 | 14.838311568  | -18.664729368 | 1 | 0 | 1 | # | ao  |
| 1535 | 10 | 1 | 1.575000  | -12.941955029 | 16.343538432  | 18.664729368  | 1 | 0 | 0 | # | ao  |
| 1536 | 10 | 1 | 1.575000  | -10.353605029 | 11.888988432  | 18.664729368  | 1 | 0 | 0 | # | ao  |
| 1537 | 10 | 2 | 0.425000  | -11.795449128 | 13.366367322  | -17.178884937 | 1 | 0 | 1 | # | ho  |
| 1538 | 10 | 2 | 0.425000  | -14.383799128 | 8.911817322   | -17.178884937 | 1 | 0 | 1 | # | ho  |
| 1539 | 10 | 2 | 0.425000  | -14.088050872 | 13.360932678  | 17.178884937  | 1 | 0 | 0 | # | ho  |
| 1540 | 10 | 2 | 0.425000  | -11.499700872 | 17.815482678  | 17.178884937  | 1 | 0 | 0 | # | ho  |
| 1541 | 10 | 4 | -1.050000 | -14.548785345 | 10.586601481  | 17.631577932  | 1 | 0 | 0 | # | ob  |
| 1542 | 10 | 4 | -1.050000 | -10.506582736 | 15.214196126  | 15.433153738  | 1 | 0 | 0 | # | ob  |
| 1543 | 10 | 4 | -1.050000 | -11.959855513 | 11.682749320  | 17.631368622  | 1 | 0 | 0 | # | ob  |
| 1544 | 10 | 4 | -1.050000 | -13.095260908 | 15.957810300  | 15.431920289  | 1 | 0 | 0 | # | ob  |
| 1545 | 10 | 4 | -1.050000 | -14.548205513 | 16.137299320  | 17.631368622  | 1 | 0 | 0 | # | ob  |
| 1546 | 10 | 4 | -1.050000 | -13.923644487 | 15.044550680  | -17.631368622 | 1 | 0 | 1 | # | ob  |
| 1547 | 10 | 4 | -1.050000 | -10.506910908 | 11.503260300  | 15.431920289  | 1 | 0 | 0 | # | ob  |
| 1548 | 10 | 4 | -1.050000 | -13.923064655 | 11.686148519  | -17.631577932 | 1 | 0 | 1 | # | ob  |
| 1549 | 10 | 4 | -1.050000 | -12.788567264 | 15.967653874  | -15.433153738 | 1 | 0 | 1 | # | ob  |
| 1550 | 10 | 4 | -1.050000 | -11.334714655 | 16.140698519  | -17.631577932 | 1 | 0 | 1 | # | ob  |
| 1551 | 10 | 4 | -1.050000 | -15.376917264 | 11.513103874  | -15.433153738 | 1 | 0 | 1 | # | ob  |
| 1552 | 10 | 4 | -1.050000 | -12.788239092 | 10.769489700  | -15.431920289 | 1 | 0 | 1 | # | ob  |
| 1553 | 10 | 7 | -0.950000 | -13.530842343 | 8.910040996   | -17.652417115 | 1 | 0 | 1 | # | oh  |
| 1554 | 10 | 4 | -1.050000 | -10.863018349 | 8.913076970   | -15.603517583 | 1 | 0 | 1 | # | ob  |
| 1555 | 10 | 7 | -0.950000 | -10.942492343 | 13.364590996  | -17.652417115 | 1 | 0 | 1 | # | oh  |
| 1556 | 10 | 4 | -1.050000 | -13.451368349 | 13.367626970  | -15.603517583 | 1 | 0 | 1 | # | ob  |
| 1557 | 10 | 7 | -0.950000 | -12.352657657 | 17.817259004  | 17.652417115  | 1 | 0 | 0 | # | oh  |
| 1558 | 10 | 4 | -1.050000 | -15.020481651 | 17.814223030  | 15.603517583  | 1 | 0 | 0 | # | ob  |
| 1559 | 10 | 7 | -0.950000 | -14.941007657 | 13.362709004  | 17.652417115  | 1 | 0 | 0 | # | oh  |
| 1560 | 10 | 4 | -1.050000 | -12.432131651 | 13.359673030  | 15.603517583  | 1 | 0 | 0 | # | ob  |
| 1561 | 10 | 4 | -1.050000 | -11.335294487 | 10.590000680  | -17.631368622 | 1 | 0 | 1 | # | ob  |
| 1562 | 10 | 4 | -1.050000 | -15.376589092 | 15.224039700  | -15.431920289 | 1 | 0 | 1 | # | ob  |
| 1563 | 10 | 4 | -1.050000 | -11.960435345 | 15.041151481  | 17.631577932  | 1 | 0 | 0 | # | ob  |
| 1564 | 10 | 4 | -1.050000 | -13.094932736 | 10.759646126  | 15.433153738  | 1 | 0 | 0 | # | ob  |
| 1565 | 10 | 8 | 2.100000  | -11.307102986 | 10.436219204  | -16.002222830 | 1 | 0 | 1 | # | st  |
| 1566 | 10 | 8 | 2.100000  | -11.988072226 | 14.882470782  | 16.003201903  | 1 | 0 | 0 | # | st  |
| 1567 | 10 | 8 | 2.100000  | -14.576397014 | 16.291080796  | 16.002222830  | 1 | 0 | 0 | # | st  |
| 1568 | 10 | 8 | 2.100000  | -11.988047014 | 11.836530796  | 16.002222830  | 1 | 0 | 0 | # | st  |
| 1569 | 10 | 8 | 2.100000  | -11.307077774 | 16.299379218  | -16.003201903 | 1 | 0 | 1 | # | st  |
| 1570 | 10 | 8 | 2.100000  | -13.895427774 | 11.844829218  | -16.003201903 | 1 | 0 | 1 | # | st  |
| 1571 | 10 | 8 | 2.100000  | -13.895452986 | 14.890769204  | -16.002222830 | 1 | 0 | 1 | # | st  |
| 1572 | 10 | 8 | 2.100000  | -14.576422226 | 10.427920782  | 16.003201903  | 1 | 0 | 0 | # | st  |
| 1573 | 10 | 1 | 1.575000  | -12.941544971 | 19.292861568  | -18.664729368 | 1 | 0 | 1 | # | ao  |

|      |    |   |           |               |               |               |   |   |   |   |     |
|------|----|---|-----------|---------------|---------------|---------------|---|---|---|---|-----|
| 1574 | 10 | 1 | 1.575000  | -15.529894971 | 23.747411568  | -18.664729368 | 1 | 0 | 1 | # | ao  |
| 1575 | 10 | 1 | 1.575000  | -12.941955029 | 25.252638432  | 18.664729368  | 1 | 0 | 0 | # | ao  |
| 1576 | 10 | 1 | 1.575000  | -10.353605029 | 20.798088432  | 18.664729368  | 1 | 0 | 0 | # | ao  |
| 1577 | 10 | 2 | 0.425000  | -11.795449128 | 22.275467322  | -17.178884937 | 1 | 0 | 1 | # | ho  |
| 1578 | 10 | 2 | 0.425000  | -14.383799128 | 17.820917322  | -17.178884937 | 1 | 0 | 1 | # | ho  |
| 1579 | 10 | 2 | 0.425000  | -14.088050872 | 22.270032678  | 17.178884937  | 1 | 0 | 0 | # | ho  |
| 1580 | 10 | 2 | 0.425000  | -11.499700872 | 26.724582678  | 17.178884937  | 1 | 0 | 0 | # | ho  |
| 1581 | 10 | 4 | -1.050000 | -14.548785345 | 19.495701481  | 17.631577932  | 1 | 0 | 0 | # | ob  |
| 1582 | 10 | 4 | -1.050000 | -10.506582736 | 24.123296126  | 15.433153738  | 1 | 0 | 0 | # | ob  |
| 1583 | 10 | 4 | -1.050000 | -11.959855513 | 20.591849320  | 17.631368622  | 1 | 0 | 0 | # | ob  |
| 1584 | 10 | 4 | -1.050000 | -13.095260908 | 24.866910300  | 15.431920289  | 1 | 0 | 0 | # | ob  |
| 1585 | 10 | 4 | -1.050000 | -14.548205513 | 25.046399320  | 17.631368622  | 1 | 0 | 0 | # | ob  |
| 1586 | 10 | 4 | -1.050000 | -13.923644487 | 23.953650680  | -17.631368622 | 1 | 0 | 1 | # | ob  |
| 1587 | 10 | 4 | -1.050000 | -10.506910908 | 20.412360300  | 15.431920289  | 1 | 0 | 0 | # | ob  |
| 1588 | 10 | 4 | -1.050000 | -13.923064655 | 20.595248519  | -17.631577932 | 1 | 0 | 1 | # | ob  |
| 1589 | 10 | 4 | -1.050000 | -12.788567264 | 24.876753874  | -15.433153738 | 1 | 0 | 1 | # | ob  |
| 1590 | 10 | 4 | -1.050000 | -11.334714655 | 25.049798519  | -17.631577932 | 1 | 0 | 1 | # | ob  |
| 1591 | 10 | 4 | -1.050000 | -15.376917264 | 20.422203874  | -15.433153738 | 1 | 0 | 1 | # | ob  |
| 1592 | 10 | 4 | -1.050000 | -12.788239092 | 19.678589700  | -15.431920289 | 1 | 0 | 1 | # | ob  |
| 1593 | 10 | 7 | -0.950000 | -13.530842343 | 17.819140996  | -17.652417115 | 1 | 0 | 1 | # | oh  |
| 1594 | 10 | 4 | -1.050000 | -10.863018349 | 17.822176970  | -15.603517583 | 1 | 0 | 1 | # | ob  |
| 1595 | 10 | 7 | -0.950000 | -10.942492343 | 22.273690996  | -17.652417115 | 1 | 0 | 1 | # | oh  |
| 1596 | 10 | 4 | -1.050000 | -13.451368349 | 22.276726970  | -15.603517583 | 1 | 0 | 1 | # | ob  |
| 1597 | 10 | 7 | -0.950000 | -12.352657657 | 26.726359004  | 17.652417115  | 1 | 0 | 0 | # | oh  |
| 1598 | 10 | 4 | -1.050000 | -15.020481651 | 26.723323030  | 15.603517583  | 1 | 0 | 0 | # | ob  |
| 1599 | 10 | 7 | -0.950000 | -14.941007657 | 22.271809004  | 17.652417115  | 1 | 0 | 0 | # | oh  |
| 1600 | 10 | 4 | -1.050000 | -12.432131651 | 22.268773030  | 15.603517583  | 1 | 0 | 0 | # | ob  |
| 1601 | 10 | 4 | -1.050000 | -11.335294487 | 19.499100680  | -17.631368622 | 1 | 0 | 1 | # | ob  |
| 1602 | 10 | 4 | -1.050000 | -15.376589092 | 24.133139700  | -15.431920289 | 1 | 0 | 1 | # | ob  |
| 1603 | 10 | 4 | -1.050000 | -11.960435345 | 23.950251481  | 17.631577932  | 1 | 0 | 0 | # | ob  |
| 1604 | 10 | 4 | -1.050000 | -13.094932736 | 19.668746126  | 15.433153738  | 1 | 0 | 0 | # | ob  |
| 1605 | 10 | 8 | 2.100000  | -11.307102986 | 19.345319204  | -16.002222830 | 1 | 0 | 1 | # | st  |
| 1606 | 10 | 8 | 2.100000  | -11.988072226 | 23.791570782  | 16.003201903  | 1 | 0 | 0 | # | st  |
| 1607 | 10 | 8 | 2.100000  | -14.576397014 | 25.200180796  | 16.002222830  | 1 | 0 | 0 | # | st  |
| 1608 | 10 | 8 | 2.100000  | -11.988047014 | 20.745630796  | 16.002222830  | 1 | 0 | 0 | # | st  |
| 1609 | 10 | 8 | 2.100000  | -11.307077774 | 25.208479218  | -16.003201903 | 1 | 0 | 1 | # | st  |
| 1610 | 10 | 8 | 2.100000  | -13.895427774 | 20.753929218  | -16.003201903 | 1 | 0 | 1 | # | st  |
| 1611 | 10 | 8 | 2.100000  | -13.895452986 | 23.799869204  | -16.002222830 | 1 | 0 | 1 | # | st  |
| 1612 | 10 | 8 | 2.100000  | -14.576422226 | 19.337020782  | 16.003201903  | 1 | 0 | 0 | # | st  |
| 1613 | 10 | 1 | 1.575000  | -12.941544971 | -27.434438432 | -18.664729368 | 1 | 1 | 1 | # | ao  |
| 1614 | 10 | 1 | 1.575000  | -15.529894971 | -22.979888432 | -18.664729368 | 1 | 1 | 1 | # | ao  |
| 1615 | 10 | 1 | 1.575000  | -12.941955029 | -21.474661568 | 18.664729368  | 1 | 1 | 0 | # | ao  |
| 1616 | 10 | 1 | 1.575000  | -10.353605029 | -25.929211568 | 18.664729368  | 1 | 1 | 0 | # | ao  |
| 1617 | 10 | 2 | 0.425000  | -11.795449128 | -24.451832678 | -17.178884937 | 1 | 1 | 1 | # | ho  |
| 1618 | 10 | 2 | 0.425000  | -14.383799128 | 26.730017322  | -17.178884937 | 1 | 0 | 1 | # | ho  |
| 1619 | 10 | 2 | 0.425000  | -14.088050872 | -24.457267322 | 17.178884937  | 1 | 1 | 0 | # | ho  |
| 1620 | 10 | 3 | 0.425000  | -11.499700872 | -20.002717322 | 17.178884937  | 1 | 1 | 0 | # | do  |
| 1621 | 10 | 4 | -1.050000 | -14.548785345 | -27.231598519 | 17.631577932  | 1 | 1 | 0 | # | ob  |
| 1622 | 10 | 4 | -1.050000 | -10.506582736 | -22.604003874 | 15.433153738  | 1 | 1 | 0 | # | ob  |
| 1623 | 10 | 4 | -1.050000 | -11.959855513 | -26.135450680 | 17.631368622  | 1 | 1 | 0 | # | ob  |
| 1624 | 10 | 4 | -1.050000 | -13.095260908 | -21.860389700 | 15.431920289  | 1 | 1 | 0 | # | ob  |
| 1625 | 10 | 4 | -1.050000 | -14.548205513 | -21.680900680 | 17.631368622  | 1 | 1 | 0 | # | ob  |
| 1626 | 10 | 4 | -1.050000 | -13.923644487 | -22.773649320 | -17.631368622 | 1 | 1 | 1 | # | ob  |
| 1627 | 10 | 4 | -1.050000 | -10.506910908 | -26.314939700 | 15.431920289  | 1 | 1 | 0 | # | ob  |
| 1628 | 10 | 4 | -1.050000 | -13.923064655 | -26.132051481 | -17.631577932 | 1 | 1 | 1 | # | ob  |
| 1629 | 10 | 4 | -1.050000 | -12.788567264 | -21.850546126 | -15.433153738 | 1 | 1 | 1 | # | ob  |
| 1630 | 10 | 4 | -1.050000 | -11.334714655 | -21.677501481 | -17.631577932 | 1 | 1 | 1 | # | ob  |
| 1631 | 10 | 4 | -1.050000 | -15.376917264 | -26.305096126 | -15.433153738 | 1 | 1 | 1 | # | ob  |
| 1632 | 10 | 4 | -1.050000 | -12.788239092 | -27.048710300 | -15.431920289 | 1 | 1 | 1 | # | ob  |
| 1633 | 10 | 7 | -0.950000 | -13.530842343 | 26.728240996  | -17.652417115 | 1 | 0 | 1 | # | oh  |
| 1634 | 10 | 4 | -1.050000 | -10.863018349 | 26.731276970  | -15.603517583 | 1 | 0 | 1 | # | ob  |
| 1635 | 10 | 7 | -0.950000 | -10.942492343 | -24.453609004 | -17.652417115 | 1 | 1 | 1 | # | oh  |
| 1636 | 10 | 4 | -1.050000 | -13.451368349 | -24.450573030 | -15.603517583 | 1 | 1 | 1 | # | ob  |
| 1637 | 10 | 5 | -0.950000 | -12.352657657 | -20.000940996 | 17.652417115  | 1 | 1 | 0 | # | oh  |
| 1638 | 10 | 6 | -0.950000 | -15.020481651 | -20.003976970 | 15.603517583  | 1 | 1 | 0 | # | oh  |
| 1639 | 10 | 7 | -0.950000 | -14.941007657 | -24.455490996 | 17.652417115  | 1 | 1 | 0 | # | oh  |
| 1640 | 10 | 4 | -1.050000 | -12.432131651 | -24.458526970 | 15.603517583  | 1 | 1 | 0 | # | ob  |
| 1641 | 10 | 4 | -1.050000 | -11.335294487 | -27.228199320 | -17.631368622 | 1 | 1 | 1 | # | ob  |
| 1642 | 10 | 4 | -1.050000 | -15.376589092 | -22.594160300 | -15.431920289 | 1 | 1 | 1 | # | ob  |
| 1643 | 10 | 4 | -1.050000 | -11.960435345 | -22.77048519  | 17.631577932  | 1 | 1 | 0 | # | ob  |
| 1644 | 10 | 4 | -1.050000 | -13.094932736 | -27.058553874 | 15.433153738  | 1 | 1 | 0 | # | ob  |
| 1645 | 10 | 8 | 2.100000  | -11.307102986 | -27.381980796 | -16.002222830 | 1 | 1 | 1 | # | st  |
| 1646 | 10 | 8 | 2.100000  | -11.988072226 | -22.935729218 | 16.003201903  | 1 | 1 | 0 | # | st  |
| 1647 | 10 | 8 | 2.100000  | -14.576397014 | -21.527119204 | 16.002222830  | 1 | 1 | 0 | # | st  |
| 1648 | 10 | 8 | 2.100000  | -11.988047014 | -25.981669204 | 16.002222830  | 1 | 1 | 0 | # | st  |
| 1649 | 10 | 8 | 2.100000  | -11.307077774 | -21.518820782 | -16.003201903 | 1 | 1 | 1 | # | st  |
| 1650 | 10 | 8 | 2.100000  | -13.895427774 | -25.973370782 | -16.003201903 | 1 | 1 | 1 | # | st  |
| 1651 | 10 | 8 | 2.100000  | -13.895452986 | -22.927430796 | -16.002222830 | 1 | 1 | 1 | # | st  |
| 1652 | 10 | 8 | 2.100000  | -14.576422226 | -27.390279218 | 16.003201903  | 1 | 1 | 0 | # | st  |
| 1653 | 10 | 6 | -0.950000 | -10.792633573 | -19.680858114 | -6.743779050  | 1 | 1 | 1 | # | oht |
| 1654 | 10 | 6 | -0.950000 | -15.225161797 | -0.272172439  | -12.134227113 | 1 | 0 | 1 | # | oht |
| 1655 | 10 | 3 | 0.425000  | 15.486672253  | -1.308055357  | -12.328360493 | 0 | 0 | 1 | # | do  |
| 1656 | 10 | 3 | 0.425000  | -10.530111381 | -1.054326608  | -6.235429463  | 1 | 0 | 1 | # | do  |
| 1657 | 10 | 3 | 0.425000  | -10.666251036 | -18.596754758 | -6.945886456  | 1 | 1 | 1 | # | do  |
| 1658 | 10 | 3 | 0.425000  | -15.417051085 | -19.012312375 | -12.696363051 | 1 | 1 | 1 | # | do  |
| 1659 | 11 | 1 | 1.575000  | -7.764844971  | 1.474661568   | -18.664729368 | 1 | 0 | 1 | # | ao  |
| 1660 | 11 | 1 | 1.575000  | -10.353194971 | 5.929211568   | -18.664729368 | 1 | 0 | 1 | # | ao  |
| 1661 | 11 | 1 | 1.575000  | -7.765255029  | 7.434438432   | 18.664729368  | 1 | 0 | 0 | # | ao  |
| 1662 | 11 | 1 | 1.575000  | -5.176905029  | 2.979888432   | 18.664729368  | 1 | 0 | 0 | # | ao  |
| 1663 | 11 | 2 | 0.425000  | -6.618749128  | 4.457267322   | -17.178884937 | 1 | 0 | 1 | # | ho  |
| 1664 | 11 | 3 | 0.425000  | -9.207099128  | 0.002717322   | -17.178884937 | 1 | 0 | 1 | # | do  |
| 1665 | 11 | 2 | 0.425000  | -8.911350872  | 4.451832678   | 17.178884937  | 1 | 0 | 0 | # | ho  |
| 1666 | 11 | 2 | 0.425000  | -6.323000872  | 8.906382678   | 17.178884937  | 1 | 0 | 0 | # | ho  |

|      |    |   |           |               |              |               |   |   |   |   |     |
|------|----|---|-----------|---------------|--------------|---------------|---|---|---|---|-----|
| 1667 | 11 | 4 | -1.050000 | -9.372085345  | 1.677501481  | 17.631577932  | 1 | 0 | 0 | # | ob  |
| 1668 | 11 | 4 | -1.050000 | -5.329882736  | 6.305096126  | 15.433153738  | 1 | 0 | 0 | # | ob  |
| 1669 | 11 | 4 | -1.050000 | -6.783155513  | 2.773649320  | 17.631368622  | 1 | 0 | 0 | # | ob  |
| 1670 | 11 | 4 | -1.050000 | -7.918560908  | 7.048710300  | 15.431920289  | 1 | 0 | 0 | # | ob  |
| 1671 | 11 | 4 | -1.050000 | -9.371505513  | 7.228199320  | 17.631368622  | 1 | 0 | 0 | # | ob  |
| 1672 | 11 | 4 | -1.050000 | -8.746944487  | 6.135450680  | -17.631368622 | 1 | 0 | 1 | # | ob  |
| 1673 | 11 | 4 | -1.050000 | -5.330210908  | 2.594160300  | 15.431920289  | 1 | 0 | 0 | # | ob  |
| 1674 | 11 | 4 | -1.050000 | -8.746364655  | 2.777048519  | -17.631577932 | 1 | 0 | 1 | # | ob  |
| 1675 | 11 | 4 | -1.050000 | -7.611867264  | 7.058553874  | -15.433153738 | 1 | 0 | 1 | # | ob  |
| 1676 | 11 | 4 | -1.050000 | -6.158014655  | 7.231598519  | -17.631577932 | 1 | 0 | 1 | # | ob  |
| 1677 | 11 | 4 | -1.050000 | -10.200217264 | 2.604003874  | -15.433153738 | 1 | 0 | 1 | # | ob  |
| 1678 | 11 | 4 | -1.050000 | -7.611539092  | 1.860389700  | -15.431920289 | 1 | 0 | 1 | # | ob  |
| 1679 | 11 | 5 | -0.950000 | -8.354142343  | 0.000940996  | -17.652417115 | 1 | 0 | 1 | # | oh  |
| 1680 | 11 | 6 | -0.950000 | -5.686318349  | 0.003976970  | -15.603517583 | 1 | 0 | 1 | # | oht |
| 1681 | 11 | 7 | -0.950000 | -5.765792343  | 4.455490996  | -17.652417115 | 1 | 0 | 1 | # | oh  |
| 1682 | 11 | 4 | -1.050000 | -8.274668349  | 4.458526970  | -15.603517583 | 1 | 0 | 1 | # | ob  |
| 1683 | 11 | 7 | -0.950000 | -7.175957657  | 8.908159004  | 17.652417115  | 1 | 0 | 0 | # | oh  |
| 1684 | 11 | 4 | -1.050000 | -9.843781651  | 8.905123030  | 15.603517583  | 1 | 0 | 0 | # | ob  |
| 1685 | 11 | 7 | -0.950000 | -9.764307657  | 4.453609004  | 17.652417115  | 1 | 0 | 0 | # | oh  |
| 1686 | 11 | 4 | -1.050000 | -7.255431651  | 4.450573030  | 15.603517583  | 1 | 0 | 0 | # | ob  |
| 1687 | 11 | 4 | -1.050000 | -6.158594487  | 1.680900680  | -17.631368622 | 1 | 0 | 1 | # | ob  |
| 1688 | 11 | 4 | -1.050000 | -10.199889092 | 6.314939700  | -15.431920289 | 1 | 0 | 1 | # | ob  |
| 1689 | 11 | 4 | -1.050000 | -6.783735345  | 6.132051481  | 17.631577932  | 1 | 0 | 0 | # | ob  |
| 1690 | 11 | 4 | -1.050000 | -7.918232736  | 1.850546126  | 15.433153738  | 1 | 0 | 0 | # | ob  |
| 1691 | 11 | 8 | 2.100000  | -6.130402986  | 1.527119204  | -16.002222830 | 1 | 0 | 1 | # | st  |
| 1692 | 11 | 8 | 2.100000  | -6.811372226  | 5.973370782  | 16.003201903  | 1 | 0 | 0 | # | st  |
| 1693 | 11 | 8 | 2.100000  | -9.399697014  | 7.381980796  | 16.002222830  | 1 | 0 | 0 | # | st  |
| 1694 | 11 | 8 | 2.100000  | -6.811347014  | 2.927430796  | 16.002222830  | 1 | 0 | 0 | # | st  |
| 1695 | 11 | 8 | 2.100000  | -6.130377774  | 7.390279218  | -16.003201903 | 1 | 0 | 1 | # | st  |
| 1696 | 11 | 8 | 2.100000  | -8.718727774  | 2.935729218  | -16.003201903 | 1 | 0 | 1 | # | st  |
| 1697 | 11 | 8 | 2.100000  | -8.718752986  | 5.981669204  | -16.002222830 | 1 | 0 | 1 | # | st  |
| 1698 | 11 | 8 | 2.100000  | -9.399722226  | 1.518820782  | 16.003201903  | 1 | 0 | 0 | # | st  |
| 1699 | 11 | 1 | 1.575000  | -7.764844971  | 10.383761568 | -18.664729368 | 1 | 0 | 1 | # | ao  |
| 1700 | 11 | 1 | 1.575000  | -10.353194971 | 14.838311568 | -18.664729368 | 1 | 0 | 1 | # | ao  |
| 1701 | 11 | 1 | 1.575000  | -7.765255029  | 16.343538432 | 18.664729368  | 1 | 0 | 0 | # | ao  |
| 1702 | 11 | 1 | 1.575000  | -5.176905029  | 11.888988432 | 18.664729368  | 1 | 0 | 0 | # | ao  |
| 1703 | 11 | 2 | 0.425000  | -6.618749128  | 13.366367322 | -17.178884937 | 1 | 0 | 1 | # | ho  |
| 1704 | 11 | 2 | 0.425000  | -9.207099128  | 8.911817322  | -17.178884937 | 1 | 0 | 1 | # | ho  |
| 1705 | 11 | 2 | 0.425000  | -8.911350872  | 13.360932678 | 17.178884937  | 1 | 0 | 0 | # | ho  |
| 1706 | 11 | 2 | 0.425000  | -6.323000872  | 17.815482678 | 17.178884937  | 1 | 0 | 0 | # | ho  |
| 1707 | 11 | 4 | -1.050000 | -9.372085345  | 10.586601481 | 17.631577932  | 1 | 0 | 0 | # | ob  |
| 1708 | 11 | 4 | -1.050000 | -5.329882736  | 15.214196126 | 15.433153738  | 1 | 0 | 0 | # | ob  |
| 1709 | 11 | 4 | -1.050000 | -6.783155513  | 11.682749320 | 17.631368622  | 1 | 0 | 0 | # | ob  |
| 1710 | 11 | 4 | -1.050000 | -7.918560908  | 15.957810300 | 15.431920289  | 1 | 0 | 0 | # | ob  |
| 1711 | 11 | 4 | -1.050000 | -9.371505513  | 16.137299320 | 17.631368622  | 1 | 0 | 0 | # | ob  |
| 1712 | 11 | 4 | -1.050000 | -8.746944487  | 15.044550680 | -17.631368622 | 1 | 0 | 1 | # | ob  |
| 1713 | 11 | 4 | -1.050000 | -5.330210908  | 11.503260300 | 15.431920289  | 1 | 0 | 0 | # | ob  |
| 1714 | 11 | 4 | -1.050000 | -8.746364655  | 11.686148519 | -17.631577932 | 1 | 0 | 1 | # | ob  |
| 1715 | 11 | 4 | -1.050000 | -7.611867264  | 15.967653874 | -15.433153738 | 1 | 0 | 1 | # | ob  |
| 1716 | 11 | 4 | -1.050000 | -6.158014655  | 16.140698519 | -17.631577932 | 1 | 0 | 1 | # | ob  |
| 1717 | 11 | 4 | -1.050000 | -10.200217264 | 11.513103874 | -15.433153738 | 1 | 0 | 1 | # | ob  |
| 1718 | 11 | 4 | -1.050000 | -7.611539092  | 10.769489700 | -15.431920289 | 1 | 0 | 1 | # | ob  |
| 1719 | 11 | 7 | -0.950000 | -8.354142343  | 8.910040996  | -17.652417115 | 1 | 0 | 1 | # | oh  |
| 1720 | 11 | 4 | -1.050000 | -5.686318349  | 8.913076970  | -15.603517583 | 1 | 0 | 1 | # | ob  |
| 1721 | 11 | 7 | -0.950000 | -5.765792343  | 13.364590996 | -17.652417115 | 1 | 0 | 1 | # | oh  |
| 1722 | 11 | 4 | -1.050000 | -8.274668349  | 13.367626970 | -15.603517583 | 1 | 0 | 1 | # | ob  |
| 1723 | 11 | 7 | -0.950000 | -7.175957657  | 17.817259004 | 17.652417115  | 1 | 0 | 0 | # | oh  |
| 1724 | 11 | 4 | -1.050000 | -9.843781651  | 17.814223030 | 15.603517583  | 1 | 0 | 0 | # | ob  |
| 1725 | 11 | 7 | -0.950000 | -9.764307657  | 13.362709004 | 17.652417115  | 1 | 0 | 0 | # | oh  |
| 1726 | 11 | 4 | -1.050000 | -7.255431651  | 13.359673030 | 15.603517583  | 1 | 0 | 0 | # | ob  |
| 1727 | 11 | 4 | -1.050000 | -6.158594487  | 10.590000680 | -17.631368622 | 1 | 0 | 1 | # | ob  |
| 1728 | 11 | 4 | -1.050000 | -10.199889092 | 15.224039700 | -15.431920289 | 1 | 0 | 1 | # | ob  |
| 1729 | 11 | 4 | -1.050000 | -6.783735345  | 15.041151481 | 17.631577932  | 1 | 0 | 0 | # | ob  |
| 1730 | 11 | 4 | -1.050000 | -7.918232736  | 10.759646126 | 15.433153738  | 1 | 0 | 0 | # | ob  |
| 1731 | 11 | 8 | 2.100000  | -6.130402986  | 10.436219204 | -16.002222830 | 1 | 0 | 1 | # | st  |
| 1732 | 11 | 8 | 2.100000  | -6.811372226  | 14.882470782 | 16.003201903  | 1 | 0 | 0 | # | st  |
| 1733 | 11 | 8 | 2.100000  | -9.399697014  | 16.291080796 | 16.002222830  | 1 | 0 | 0 | # | st  |
| 1734 | 11 | 8 | 2.100000  | -6.811347014  | 11.836530796 | 16.002222830  | 1 | 0 | 0 | # | st  |
| 1735 | 11 | 8 | 2.100000  | -6.130377774  | 16.299379218 | -16.003201903 | 1 | 0 | 1 | # | st  |
| 1736 | 11 | 8 | 2.100000  | -8.718727774  | 11.844829218 | -16.003201903 | 1 | 0 | 1 | # | st  |
| 1737 | 11 | 8 | 2.100000  | -8.718752986  | 14.890769204 | -16.002222830 | 1 | 0 | 1 | # | st  |
| 1738 | 11 | 8 | 2.100000  | -9.399722226  | 10.427920782 | 16.003201903  | 1 | 0 | 0 | # | st  |
| 1739 | 11 | 1 | 1.575000  | -7.764844971  | 19.292861568 | -18.664729368 | 1 | 0 | 1 | # | ao  |
| 1740 | 11 | 1 | 1.575000  | -10.353194971 | 23.747411568 | -18.664729368 | 1 | 0 | 1 | # | ao  |
| 1741 | 11 | 1 | 1.575000  | -7.765255029  | 25.252638432 | 18.664729368  | 1 | 0 | 0 | # | ao  |
| 1742 | 11 | 1 | 1.575000  | -5.176905029  | 20.798088432 | 18.664729368  | 1 | 0 | 0 | # | ao  |
| 1743 | 11 | 2 | 0.425000  | -6.618749128  | 22.275467322 | -17.178884937 | 1 | 0 | 1 | # | ho  |
| 1744 | 11 | 2 | 0.425000  | -9.207099128  | 17.820917322 | -17.178884937 | 1 | 0 | 1 | # | ho  |
| 1745 | 11 | 2 | 0.425000  | -8.911350872  | 22.270032678 | 17.178884937  | 1 | 0 | 0 | # | ho  |
| 1746 | 11 | 2 | 0.425000  | -6.323000872  | 26.724582678 | 17.178884937  | 1 | 0 | 0 | # | ho  |
| 1747 | 11 | 4 | -1.050000 | -9.372085345  | 19.495701481 | 17.631577932  | 1 | 0 | 0 | # | ob  |
| 1748 | 11 | 4 | -1.050000 | -5.329882736  | 24.123296126 | 15.433153738  | 1 | 0 | 0 | # | ob  |
| 1749 | 11 | 4 | -1.050000 | -6.783155513  | 20.591849320 | 17.631368622  | 1 | 0 | 0 | # | ob  |
| 1750 | 11 | 4 | -1.050000 | -7.918560908  | 24.866910300 | 15.431920289  | 1 | 0 | 0 | # | ob  |
| 1751 | 11 | 4 | -1.050000 | -9.371505513  | 25.046399320 | 17.631368622  | 1 | 0 | 0 | # | ob  |
| 1752 | 11 | 4 | -1.050000 | -8.746944487  | 23.953650680 | -17.631368622 | 1 | 0 | 1 | # | ob  |
| 1753 | 11 | 4 | -1.050000 | -5.330210908  | 20.412360300 | 15.431920289  | 1 | 0 | 0 | # | ob  |
| 1754 | 11 | 4 | -1.050000 | -8.746364655  | 20.595248519 | -17.631577932 | 1 | 0 | 1 | # | ob  |
| 1755 | 11 | 4 | -1.050000 | -7.611867264  | 24.876753874 | -15.433153738 | 1 | 0 | 1 | # | ob  |
| 1756 | 11 | 4 | -1.050000 | -6.158014655  | 25.049798519 | -17.631577932 | 1 | 0 | 1 | # | ob  |
| 1757 | 11 | 4 | -1.050000 | -10.200217264 | 20.422203874 | -15.433153738 | 1 | 0 | 1 | # | ob  |
| 1758 | 11 | 4 | -1.050000 | -7.611539092  | 19.678589700 | -15.431920289 | 1 | 0 | 1 | # | ob  |
| 1759 | 11 | 7 | -0.950000 | -8.354142343  | 17.819140996 | -17.652417115 | 1 | 0 | 1 | # | oh  |

|      |    |   |           |               |               |               |   |   |   |   |     |
|------|----|---|-----------|---------------|---------------|---------------|---|---|---|---|-----|
| 1760 | 11 | 4 | -1.050000 | -5.686318349  | 17.822176970  | -15.603517583 | 1 | 0 | 1 | # | ob  |
| 1761 | 11 | 7 | -0.950000 | -5.765792343  | 22.273690996  | -17.652417115 | 1 | 0 | 1 | # | oh  |
| 1762 | 11 | 4 | -1.050000 | -8.274668349  | 22.276726970  | -15.603517583 | 1 | 0 | 1 | # | ob  |
| 1763 | 11 | 7 | -0.950000 | -7.175957657  | 26.726359004  | 17.652417115  | 1 | 0 | 0 | # | oh  |
| 1764 | 11 | 4 | -1.050000 | -9.843781651  | 26.723323030  | 15.603517583  | 1 | 0 | 0 | # | ob  |
| 1765 | 11 | 7 | -0.950000 | -9.764307657  | 22.271809004  | 17.652417115  | 1 | 0 | 0 | # | oh  |
| 1766 | 11 | 4 | -1.050000 | -7.255431651  | 22.268773030  | 15.603517583  | 1 | 0 | 0 | # | ob  |
| 1767 | 11 | 4 | -1.050000 | -6.158594487  | 19.499100680  | -17.631368622 | 1 | 0 | 1 | # | ob  |
| 1768 | 11 | 4 | -1.050000 | -10.199889092 | 24.133139700  | -15.431920289 | 1 | 0 | 1 | # | ob  |
| 1769 | 11 | 4 | -1.050000 | -6.783735345  | 23.950251481  | 17.631577932  | 1 | 0 | 0 | # | ob  |
| 1770 | 11 | 4 | -1.050000 | -7.918232736  | 19.668746126  | 15.433153738  | 1 | 0 | 0 | # | ob  |
| 1771 | 11 | 8 | 2.100000  | -6.130402986  | 19.345319204  | -16.002222830 | 1 | 0 | 1 | # | st  |
| 1772 | 11 | 8 | 2.100000  | -6.811372226  | 23.791570782  | 16.003201903  | 1 | 0 | 0 | # | st  |
| 1773 | 11 | 8 | 2.100000  | -9.399697014  | 25.200180796  | 16.002222830  | 1 | 0 | 0 | # | st  |
| 1774 | 11 | 8 | 2.100000  | -6.811347014  | 20.745630796  | 16.002222830  | 1 | 0 | 0 | # | st  |
| 1775 | 11 | 8 | 2.100000  | -6.130377774  | 25.208479218  | -16.003201903 | 1 | 0 | 1 | # | st  |
| 1776 | 11 | 8 | 2.100000  | -8.718727774  | 20.753929218  | -16.003201903 | 1 | 0 | 1 | # | st  |
| 1777 | 11 | 8 | 2.100000  | -8.718752986  | 23.799869204  | -16.002222830 | 1 | 0 | 1 | # | st  |
| 1778 | 11 | 8 | 2.100000  | -9.399722226  | 19.337020782  | 16.003201903  | 1 | 0 | 0 | # | st  |
| 1779 | 11 | 1 | 1.575000  | -7.764844971  | -27.434438432 | -18.664729368 | 1 | 1 | 1 | # | ao  |
| 1780 | 11 | 1 | 1.575000  | -10.353194971 | -22.979888432 | -18.664729368 | 1 | 1 | 1 | # | ao  |
| 1781 | 11 | 1 | 1.575000  | -7.765255029  | -21.474661568 | 18.664729368  | 1 | 1 | 0 | # | ao  |
| 1782 | 11 | 1 | 1.575000  | -5.176905029  | -25.929211568 | 18.664729368  | 1 | 1 | 0 | # | ao  |
| 1783 | 11 | 2 | 0.425000  | -6.618749128  | -24.451832678 | -17.178884937 | 1 | 1 | 1 | # | ho  |
| 1784 | 11 | 2 | 0.425000  | -9.207099128  | 26.730017322  | -17.178884937 | 1 | 0 | 1 | # | ho  |
| 1785 | 11 | 2 | 0.425000  | -8.911350872  | -24.457267322 | 17.178884937  | 1 | 1 | 0 | # | ho  |
| 1786 | 11 | 3 | 0.425000  | -6.323000872  | -20.002717322 | 17.178884937  | 1 | 1 | 0 | # | do  |
| 1787 | 11 | 4 | -1.050000 | -9.372085345  | -27.231598519 | 17.631577932  | 1 | 1 | 0 | # | ob  |
| 1788 | 11 | 4 | -1.050000 | -5.329882736  | -22.604003874 | 15.433153738  | 1 | 1 | 0 | # | ob  |
| 1789 | 11 | 4 | -1.050000 | -6.783155513  | -26.135450680 | 17.631368622  | 1 | 1 | 0 | # | ob  |
| 1790 | 11 | 4 | -1.050000 | -7.918560908  | -21.860389700 | 15.431920289  | 1 | 1 | 0 | # | ob  |
| 1791 | 11 | 4 | -1.050000 | -9.371505513  | -21.680900680 | 17.631368622  | 1 | 1 | 0 | # | ob  |
| 1792 | 11 | 4 | -1.050000 | -8.746944487  | -22.773649320 | -17.631368622 | 1 | 1 | 1 | # | ob  |
| 1793 | 11 | 4 | -1.050000 | -5.330210908  | -26.314939700 | 15.431920289  | 1 | 1 | 0 | # | ob  |
| 1794 | 11 | 4 | -1.050000 | -8.746364655  | -26.132051481 | -17.631577932 | 1 | 1 | 1 | # | ob  |
| 1795 | 11 | 4 | -1.050000 | -7.611867264  | -21.850546126 | -15.433153738 | 1 | 1 | 1 | # | ob  |
| 1796 | 11 | 4 | -1.050000 | -6.158014655  | -21.677501481 | -17.631577932 | 1 | 1 | 1 | # | ob  |
| 1797 | 11 | 4 | -1.050000 | -10.200217264 | -26.305096126 | -15.433153738 | 1 | 1 | 1 | # | ob  |
| 1798 | 11 | 4 | -1.050000 | -7.611539092  | -27.048710300 | -15.431920289 | 1 | 1 | 1 | # | ob  |
| 1799 | 11 | 7 | -0.950000 | -8.354142343  | 26.728240996  | -17.652417115 | 1 | 0 | 1 | # | oh  |
| 1800 | 11 | 4 | -1.050000 | -5.686318349  | 26.731276970  | -15.603517583 | 1 | 0 | 1 | # | ob  |
| 1801 | 11 | 7 | -0.950000 | -5.765792343  | -24.453609004 | -17.652417115 | 1 | 1 | 1 | # | oh  |
| 1802 | 11 | 4 | -1.050000 | -8.274668349  | -24.450573030 | -15.603517583 | 1 | 1 | 1 | # | ob  |
| 1803 | 11 | 5 | -0.950000 | -7.175957657  | -20.000940996 | 17.652417115  | 1 | 1 | 0 | # | oho |
| 1804 | 11 | 6 | -0.950000 | -9.843781651  | -20.003976970 | 15.603517583  | 1 | 1 | 0 | # | oht |
| 1805 | 11 | 7 | -0.950000 | -9.764307657  | -24.455490996 | 17.652417115  | 1 | 1 | 0 | # | oh  |
| 1806 | 11 | 4 | -1.050000 | -7.255431651  | -24.458526970 | 15.603517583  | 1 | 1 | 0 | # | ob  |
| 1807 | 11 | 4 | -1.050000 | -6.158594487  | -27.228199320 | -17.631368622 | 1 | 1 | 1 | # | ob  |
| 1808 | 11 | 4 | -1.050000 | -10.199889092 | -22.594160300 | -15.431920289 | 1 | 1 | 1 | # | ob  |
| 1809 | 11 | 4 | -1.050000 | -6.783735345  | -22.777048519 | 17.631577932  | 1 | 1 | 0 | # | ob  |
| 1810 | 11 | 4 | -1.050000 | -7.918232736  | -27.058553874 | 15.433153738  | 1 | 1 | 0 | # | ob  |
| 1811 | 11 | 8 | 2.100000  | -6.130402986  | -27.381980796 | -16.002222830 | 1 | 1 | 1 | # | st  |
| 1812 | 11 | 8 | 2.100000  | -6.811372226  | -22.935729218 | 16.003201903  | 1 | 1 | 0 | # | st  |
| 1813 | 11 | 8 | 2.100000  | -9.399697014  | -21.527119204 | 16.002222830  | 1 | 1 | 0 | # | st  |
| 1814 | 11 | 8 | 2.100000  | -6.811347014  | -25.981669204 | 16.002222830  | 1 | 1 | 0 | # | st  |
| 1815 | 11 | 8 | 2.100000  | -6.130377774  | -21.518820782 | -16.003201903 | 1 | 1 | 1 | # | st  |
| 1816 | 11 | 8 | 2.100000  | -8.718727774  | -25.973370782 | -16.003201903 | 1 | 1 | 1 | # | st  |
| 1817 | 11 | 8 | 2.100000  | -8.718752986  | -22.927430796 | -16.002222830 | 1 | 1 | 1 | # | st  |
| 1818 | 11 | 8 | 2.100000  | -9.399722226  | -27.390279218 | 16.003201903  | 1 | 1 | 0 | # | st  |
| 1819 | 11 | 6 | -0.950000 | -5.615933573  | -19.680858114 | -6.743779050  | 1 | 1 | 1 | # | oht |
| 1820 | 11 | 6 | -0.950000 | -10.048461797 | -0.272172439  | -12.134227113 | 1 | 0 | 1 | # | oht |
| 1821 | 11 | 3 | 0.425000  | -10.396827747 | -1.308055357  | -12.328360493 | 1 | 0 | 1 | # | do  |
| 1822 | 11 | 3 | 0.425000  | -5.353411381  | -1.054326608  | -6.235429463  | 1 | 0 | 1 | # | do  |
| 1823 | 11 | 3 | 0.425000  | -5.489551036  | -18.596754758 | -6.945886456  | 1 | 1 | 1 | # | do  |
| 1824 | 11 | 3 | 0.425000  | -10.240351085 | -19.012312375 | -12.696363051 | 1 | 1 | 1 | # | do  |
| 1825 | 12 | 1 | 1.575000  | -2.588144971  | 1.474661568   | -18.664729368 | 1 | 0 | 1 | # | ao  |
| 1826 | 12 | 1 | 1.575000  | -5.176494971  | 5.929211568   | -18.664729368 | 1 | 0 | 1 | # | ao  |
| 1827 | 12 | 1 | 1.575000  | -2.588555029  | 7.434438432   | 18.664729368  | 1 | 0 | 0 | # | ao  |
| 1828 | 12 | 1 | 1.575000  | -0.000205029  | 2.979888432   | 18.664729368  | 1 | 0 | 0 | # | ao  |
| 1829 | 12 | 2 | 0.425000  | -1.442049128  | 4.457267322   | -17.178884937 | 1 | 0 | 1 | # | ho  |
| 1830 | 12 | 3 | 0.425000  | -4.030399128  | 0.002717322   | -17.178884937 | 1 | 0 | 1 | # | do  |
| 1831 | 12 | 2 | 0.425000  | -3.734650872  | 4.451832678   | 17.178884937  | 1 | 0 | 0 | # | ho  |
| 1832 | 12 | 2 | 0.425000  | -1.146300872  | 8.906382678   | 17.178884937  | 1 | 0 | 0 | # | ho  |
| 1833 | 12 | 4 | -1.050000 | -4.195385345  | 1.677501481   | 17.631577932  | 1 | 0 | 0 | # | ob  |
| 1834 | 12 | 4 | -1.050000 | -0.153182736  | 6.305096126   | 15.433153738  | 1 | 0 | 0 | # | ob  |
| 1835 | 12 | 4 | -1.050000 | -1.606455513  | 2.773649320   | 17.631368622  | 1 | 0 | 0 | # | ob  |
| 1836 | 12 | 4 | -1.050000 | -2.741860908  | 7.048710300   | 15.431920289  | 1 | 0 | 0 | # | ob  |
| 1837 | 12 | 4 | -1.050000 | -4.194805513  | 7.228199320   | 17.631368622  | 1 | 0 | 0 | # | ob  |
| 1838 | 12 | 4 | -1.050000 | -3.570244487  | 6.135450680   | -17.631368622 | 1 | 0 | 1 | # | ob  |
| 1839 | 12 | 4 | -1.050000 | -0.153510908  | 2.594160300   | 15.431920289  | 1 | 0 | 0 | # | ob  |
| 1840 | 12 | 4 | -1.050000 | -3.569646655  | 2.777048519   | -17.631577932 | 1 | 0 | 1 | # | ob  |
| 1841 | 12 | 4 | -1.050000 | -2.435167264  | 7.058553874   | -15.433153738 | 1 | 0 | 1 | # | ob  |
| 1842 | 12 | 4 | -1.050000 | -0.981314655  | 7.231598519   | -17.631577932 | 1 | 0 | 1 | # | ob  |
| 1843 | 12 | 4 | -1.050000 | -5.023517264  | 2.604003874   | -15.433153738 | 1 | 0 | 1 | # | ob  |
| 1844 | 12 | 4 | -1.050000 | -2.434839092  | 1.860389700   | -15.431920289 | 1 | 0 | 1 | # | ob  |
| 1845 | 12 | 5 | -0.950000 | -3.177442343  | 0.000940996   | -17.652417115 | 1 | 0 | 1 | # | oho |
| 1846 | 12 | 6 | -0.950000 | -0.509618349  | 0.003976970   | -15.603517583 | 1 | 0 | 1 | # | oht |
| 1847 | 12 | 7 | -0.950000 | -0.589092343  | 4.455490996   | -17.652417115 | 1 | 0 | 1 | # | oh  |
| 1848 | 12 | 4 | -1.050000 | -3.097968349  | 4.458526970   | -15.603517583 | 1 | 0 | 1 | # | ob  |
| 1849 | 12 | 7 | -0.950000 | -1.999257657  | 8.908159004   | 17.652417115  | 1 | 0 | 0 | # | oh  |
| 1850 | 12 | 4 | -1.050000 | -4.667081651  | 8.905123030   | 15.603517583  | 1 | 0 | 0 | # | ob  |
| 1851 | 12 | 7 | -0.950000 | -4.587607657  | 4.453609004   | 17.652417115  | 1 | 0 | 0 | # | oh  |
| 1852 | 12 | 4 | -1.050000 | -2.078731651  | 4.450573030   | 15.603517583  | 1 | 0 | 0 | # | ob  |

|      |    |   |           |              |               |               |   |   |   |   |    |
|------|----|---|-----------|--------------|---------------|---------------|---|---|---|---|----|
| 1853 | 12 | 4 | -1.050000 | -0.981894487 | 1.680900680   | -17.631368622 | 1 | 0 | 1 | # | ob |
| 1854 | 12 | 4 | -1.050000 | -5.023189092 | 6.314939700   | -15.431920289 | 1 | 0 | 1 | # | ob |
| 1855 | 12 | 4 | -1.050000 | -1.607035345 | 6.132051481   | 17.631577932  | 1 | 0 | 0 | # | ob |
| 1856 | 12 | 4 | -1.050000 | -2.741532736 | 1.850546126   | 15.433153738  | 1 | 0 | 0 | # | ob |
| 1857 | 12 | 8 | 2.100000  | -0.953702986 | 1.527119204   | -16.002222830 | 1 | 0 | 1 | # | st |
| 1858 | 12 | 8 | 2.100000  | -1.634672226 | 5.973370782   | 16.003201903  | 1 | 0 | 0 | # | st |
| 1859 | 12 | 8 | 2.100000  | -4.222997014 | 7.381980796   | 16.002222830  | 1 | 0 | 0 | # | st |
| 1860 | 12 | 8 | 2.100000  | -1.634647014 | 2.927430796   | 16.002222830  | 1 | 0 | 0 | # | st |
| 1861 | 12 | 8 | 2.100000  | -0.953677774 | 7.390279218   | -16.003201903 | 1 | 0 | 1 | # | st |
| 1862 | 12 | 8 | 2.100000  | -3.542027774 | 2.935729218   | -16.003201903 | 1 | 0 | 1 | # | st |
| 1863 | 12 | 8 | 2.100000  | -3.542052986 | 5.981669204   | -16.002222830 | 1 | 0 | 1 | # | st |
| 1864 | 12 | 8 | 2.100000  | -4.223022226 | 1.518820782   | 16.003201903  | 1 | 0 | 0 | # | st |
| 1865 | 12 | 1 | 1.575000  | -2.588144971 | 10.383761568  | -18.664729368 | 1 | 0 | 1 | # | ao |
| 1866 | 12 | 1 | 1.575000  | -5.176494971 | 14.838311568  | -18.664729368 | 1 | 0 | 1 | # | ao |
| 1867 | 12 | 1 | 1.575000  | -2.588555029 | 16.343538432  | 18.664729368  | 1 | 0 | 0 | # | ao |
| 1868 | 12 | 1 | 1.575000  | -0.000205029 | 11.888988432  | 18.664729368  | 1 | 0 | 0 | # | ao |
| 1869 | 12 | 2 | 0.425000  | -1.442049128 | 13.366367322  | -17.178884937 | 1 | 0 | 1 | # | ho |
| 1870 | 12 | 2 | 0.425000  | -4.030399128 | 8.911817322   | -17.178884937 | 1 | 0 | 1 | # | ho |
| 1871 | 12 | 2 | 0.425000  | -3.734650872 | 13.360932678  | 17.178884937  | 1 | 0 | 0 | # | ho |
| 1872 | 12 | 2 | 0.425000  | -1.146300872 | 17.815482678  | 17.178884937  | 1 | 0 | 0 | # | ho |
| 1873 | 12 | 4 | -1.050000 | -4.195385345 | 10.586601481  | 17.631577932  | 1 | 0 | 0 | # | ob |
| 1874 | 12 | 4 | -1.050000 | -0.153182736 | 15.214196126  | 15.433153738  | 1 | 0 | 0 | # | ob |
| 1875 | 12 | 4 | -1.050000 | -1.606455513 | 11.682749320  | 17.631368622  | 1 | 0 | 0 | # | ob |
| 1876 | 12 | 4 | -1.050000 | -2.741860908 | 15.957810300  | 15.431920289  | 1 | 0 | 0 | # | ob |
| 1877 | 12 | 4 | -1.050000 | -4.194805513 | 16.137299320  | 17.631368622  | 1 | 0 | 0 | # | ob |
| 1878 | 12 | 4 | -1.050000 | -3.570244487 | 15.044550680  | -17.631368622 | 1 | 0 | 1 | # | ob |
| 1879 | 12 | 4 | -1.050000 | -0.153510908 | 11.503260300  | 15.431920289  | 1 | 0 | 0 | # | ob |
| 1880 | 12 | 4 | -1.050000 | -3.569664655 | 11.686148519  | -17.631577932 | 1 | 0 | 1 | # | ob |
| 1881 | 12 | 4 | -1.050000 | -2.435167264 | 15.967653874  | -15.433153738 | 1 | 0 | 1 | # | ob |
| 1882 | 12 | 4 | -1.050000 | -0.981314655 | 16.140698519  | -17.631577932 | 1 | 0 | 1 | # | ob |
| 1883 | 12 | 4 | -1.050000 | -5.023517264 | 11.513103874  | -15.433153738 | 1 | 0 | 1 | # | ob |
| 1884 | 12 | 4 | -1.050000 | -2.434839092 | 10.769489700  | -15.431920289 | 1 | 0 | 1 | # | ob |
| 1885 | 12 | 7 | -0.950000 | -3.177442343 | 8.910040996   | -17.652417115 | 1 | 0 | 1 | # | oh |
| 1886 | 12 | 4 | -1.050000 | -0.509618349 | 8.913076970   | -15.603517583 | 1 | 0 | 1 | # | ob |
| 1887 | 12 | 7 | -0.950000 | -0.589092343 | 13.364590996  | -17.652417115 | 1 | 0 | 1 | # | oh |
| 1888 | 12 | 4 | -1.050000 | -3.097968349 | 13.367626970  | -15.603517583 | 1 | 0 | 1 | # | ob |
| 1889 | 12 | 7 | -0.950000 | -1.999257657 | 17.817259004  | 17.652417115  | 1 | 0 | 0 | # | oh |
| 1890 | 12 | 4 | -1.050000 | -4.667081651 | 17.814223030  | 15.603517583  | 1 | 0 | 0 | # | ob |
| 1891 | 12 | 7 | -0.950000 | -4.587607657 | 13.362709004  | 17.652417115  | 1 | 0 | 0 | # | oh |
| 1892 | 12 | 4 | -1.050000 | -2.078731651 | 13.359673030  | 15.603517583  | 1 | 0 | 0 | # | ob |
| 1893 | 12 | 4 | -1.050000 | -0.981894487 | 10.590000680  | -17.631368622 | 1 | 0 | 1 | # | ob |
| 1894 | 12 | 4 | -1.050000 | -5.023189092 | 15.224039700  | -15.431920289 | 1 | 0 | 1 | # | ob |
| 1895 | 12 | 4 | -1.050000 | -1.607035345 | 15.041151481  | 17.631577932  | 1 | 0 | 0 | # | ob |
| 1896 | 12 | 4 | -1.050000 | -2.741532736 | 10.759646126  | 15.433153738  | 1 | 0 | 0 | # | ob |
| 1897 | 12 | 8 | 2.100000  | -0.953702986 | 10.436219204  | -16.002222830 | 1 | 0 | 1 | # | st |
| 1898 | 12 | 8 | 2.100000  | -1.634672226 | 14.882470782  | 16.003201903  | 1 | 0 | 0 | # | st |
| 1899 | 12 | 8 | 2.100000  | -4.222997014 | 16.291080796  | 16.002222830  | 1 | 0 | 0 | # | st |
| 1900 | 12 | 8 | 2.100000  | -1.634647014 | 11.836530796  | 16.002222830  | 1 | 0 | 0 | # | st |
| 1901 | 12 | 8 | 2.100000  | -0.953677774 | 16.299379218  | -16.003201903 | 1 | 0 | 1 | # | st |
| 1902 | 12 | 8 | 2.100000  | -3.542027774 | 11.844829218  | -16.003201903 | 1 | 0 | 1 | # | st |
| 1903 | 12 | 8 | 2.100000  | -3.542052986 | 14.890769204  | -16.002222830 | 1 | 0 | 1 | # | st |
| 1904 | 12 | 8 | 2.100000  | -4.223022226 | 10.427920782  | 16.003201903  | 1 | 0 | 0 | # | st |
| 1905 | 12 | 1 | 1.575000  | -2.588144971 | 19.292861568  | -18.664729368 | 1 | 0 | 1 | # | ao |
| 1906 | 12 | 1 | 1.575000  | -5.176494971 | 23.747411568  | -18.664729368 | 1 | 0 | 1 | # | ao |
| 1907 | 12 | 1 | 1.575000  | -2.588555029 | 25.252638432  | 18.664729368  | 1 | 0 | 0 | # | ao |
| 1908 | 12 | 1 | 1.575000  | -0.000205029 | 20.798088432  | 18.664729368  | 1 | 0 | 0 | # | ao |
| 1909 | 12 | 2 | 0.425000  | -1.442049128 | 22.275467322  | -17.178884937 | 1 | 0 | 1 | # | ho |
| 1910 | 12 | 2 | 0.425000  | -4.030399128 | 17.820917322  | -17.178884937 | 1 | 0 | 1 | # | ho |
| 1911 | 12 | 2 | 0.425000  | -3.734650872 | 22.270032678  | 17.178884937  | 1 | 0 | 0 | # | ho |
| 1912 | 12 | 2 | 0.425000  | -1.146300872 | 26.724582678  | 17.178884937  | 1 | 0 | 0 | # | ho |
| 1913 | 12 | 4 | -1.050000 | -4.195385345 | 19.495701481  | 17.631577932  | 1 | 0 | 0 | # | ob |
| 1914 | 12 | 4 | -1.050000 | -0.153182736 | 24.123296126  | 15.433153738  | 1 | 0 | 0 | # | ob |
| 1915 | 12 | 4 | -1.050000 | -1.606455513 | 20.591849320  | 17.631368622  | 1 | 0 | 0 | # | ob |
| 1916 | 12 | 4 | -1.050000 | -2.741860908 | 24.866910300  | 15.431920289  | 1 | 0 | 0 | # | ob |
| 1917 | 12 | 4 | -1.050000 | -4.194805513 | 25.046399320  | 17.631368622  | 1 | 0 | 0 | # | ob |
| 1918 | 12 | 4 | -1.050000 | -3.570244487 | 23.953650680  | -17.631368622 | 1 | 0 | 1 | # | ob |
| 1919 | 12 | 4 | -1.050000 | -0.153510908 | 20.412360300  | 15.431920289  | 1 | 0 | 0 | # | ob |
| 1920 | 12 | 4 | -1.050000 | -3.569664655 | 20.595248519  | -17.631577932 | 1 | 0 | 1 | # | ob |
| 1921 | 12 | 4 | -1.050000 | -2.435167264 | 24.876753874  | -15.433153738 | 1 | 0 | 1 | # | ob |
| 1922 | 12 | 4 | -1.050000 | -0.981314655 | 25.049798519  | -17.631577932 | 1 | 0 | 1 | # | ob |
| 1923 | 12 | 4 | -1.050000 | -5.023517264 | 20.422203874  | -15.433153738 | 1 | 0 | 1 | # | ob |
| 1924 | 12 | 4 | -1.050000 | -2.434839092 | 19.678589700  | -15.431920289 | 1 | 0 | 1 | # | ob |
| 1925 | 12 | 7 | -0.950000 | -3.177442343 | 17.819140996  | -17.652417115 | 1 | 0 | 1 | # | oh |
| 1926 | 12 | 4 | -1.050000 | -0.509618349 | 17.822176970  | -15.603517583 | 1 | 0 | 1 | # | ob |
| 1927 | 12 | 7 | -0.950000 | -0.589092343 | 22.273690996  | -17.652417115 | 1 | 0 | 1 | # | oh |
| 1928 | 12 | 4 | -1.050000 | -3.097968349 | 22.276726970  | -15.603517583 | 1 | 0 | 1 | # | ob |
| 1929 | 12 | 7 | -0.950000 | -1.999257657 | 26.726359004  | 17.652417115  | 1 | 0 | 0 | # | oh |
| 1930 | 12 | 4 | -1.050000 | -4.667081651 | 26.723323030  | 15.603517583  | 1 | 0 | 0 | # | ob |
| 1931 | 12 | 7 | -0.950000 | -4.587607657 | 22.271809004  | 17.652417115  | 1 | 0 | 0 | # | oh |
| 1932 | 12 | 4 | -1.050000 | -2.078731651 | 22.268773030  | 15.603517583  | 1 | 0 | 0 | # | ob |
| 1933 | 12 | 4 | -1.050000 | -0.981894487 | 19.499100680  | -17.631368622 | 1 | 0 | 1 | # | ob |
| 1934 | 12 | 4 | -1.050000 | -5.023189092 | 24.133139700  | -15.431920289 | 1 | 0 | 1 | # | ob |
| 1935 | 12 | 4 | -1.050000 | -1.607035345 | 23.950251481  | 17.631577932  | 1 | 0 | 0 | # | ob |
| 1936 | 12 | 4 | -1.050000 | -2.741532736 | 19.668746126  | 15.433153738  | 1 | 0 | 0 | # | ob |
| 1937 | 12 | 8 | 2.100000  | -0.953702986 | 19.345319204  | -16.002222830 | 1 | 0 | 1 | # | st |
| 1938 | 12 | 8 | 2.100000  | -1.634672226 | 23.791570782  | 16.003201903  | 1 | 0 | 0 | # | st |
| 1939 | 12 | 8 | 2.100000  | -4.222997014 | 25.200180796  | 16.002222830  | 1 | 0 | 0 | # | st |
| 1940 | 12 | 8 | 2.100000  | -1.634647014 | 20.745630796  | 16.002222830  | 1 | 0 | 0 | # | st |
| 1941 | 12 | 8 | 2.100000  | -0.953677774 | 25.208479218  | -16.003201903 | 1 | 0 | 1 | # | st |
| 1942 | 12 | 8 | 2.100000  | -3.542027774 | 20.753929218  | -16.003201903 | 1 | 0 | 1 | # | st |
| 1943 | 12 | 8 | 2.100000  | -3.542052986 | 23.799869204  | -16.002222830 | 1 | 0 | 1 | # | st |
| 1944 | 12 | 8 | 2.100000  | -4.223022226 | 19.337020782  | 16.003201903  | 1 | 0 | 0 | # | st |
| 1945 | 12 | 1 | 1.575000  | -2.588144971 | -27.434438432 | -18.664729368 | 1 | 1 | 1 | # | ao |

|      |    |   |           |              |               |               |   |   |   |   |     |
|------|----|---|-----------|--------------|---------------|---------------|---|---|---|---|-----|
| 1946 | 12 | 1 | 1.575000  | -5.176494971 | -22.979888432 | -18.664729368 | 1 | 1 | 1 | # | ao  |
| 1947 | 12 | 1 | 1.575000  | -2.588555029 | -21.474661568 | 18.664729368  | 1 | 1 | 0 | # | ao  |
| 1948 | 12 | 1 | 1.575000  | -0.000205029 | -25.929211568 | 18.664729368  | 1 | 1 | 0 | # | ao  |
| 1949 | 12 | 2 | 0.425000  | -1.442049128 | -24.451832678 | -17.178884937 | 1 | 1 | 1 | # | ho  |
| 1950 | 12 | 2 | 0.425000  | -4.030399128 | 26.730017322  | -17.178884937 | 1 | 0 | 1 | # | ho  |
| 1951 | 12 | 2 | 0.425000  | -3.734650872 | -24.457267322 | 17.178884937  | 1 | 1 | 0 | # | ho  |
| 1952 | 12 | 3 | 0.425000  | -1.146300872 | -20.002717322 | 17.178884937  | 1 | 1 | 0 | # | do  |
| 1953 | 12 | 4 | -1.050000 | -4.195385345 | -27.231598519 | 17.631577932  | 1 | 1 | 0 | # | ob  |
| 1954 | 12 | 4 | -1.050000 | -0.153182736 | -22.604003874 | 15.433153738  | 1 | 1 | 0 | # | ob  |
| 1955 | 12 | 4 | -1.050000 | -1.606455513 | -26.135450680 | 17.631368622  | 1 | 1 | 0 | # | ob  |
| 1956 | 12 | 4 | -1.050000 | -2.741860908 | -21.860389700 | 15.431920289  | 1 | 1 | 0 | # | ob  |
| 1957 | 12 | 4 | -1.050000 | -4.194805513 | -21.680900680 | 17.631368622  | 1 | 1 | 0 | # | ob  |
| 1958 | 12 | 4 | -1.050000 | -3.570244487 | -22.773649320 | -17.631368622 | 1 | 1 | 1 | # | ob  |
| 1959 | 12 | 4 | -1.050000 | -0.153510908 | -26.314939700 | 15.431920289  | 1 | 1 | 0 | # | ob  |
| 1960 | 12 | 4 | -1.050000 | -3.569664655 | -26.132051481 | -17.631577932 | 1 | 1 | 1 | # | ob  |
| 1961 | 12 | 4 | -1.050000 | -2.435167264 | -21.850546126 | -15.433153738 | 1 | 1 | 1 | # | ob  |
| 1962 | 12 | 4 | -1.050000 | -0.981314655 | -21.677501481 | -17.631577932 | 1 | 1 | 1 | # | ob  |
| 1963 | 12 | 4 | -1.050000 | -5.023517264 | -26.305096126 | -15.433153738 | 1 | 1 | 1 | # | ob  |
| 1964 | 12 | 4 | -1.050000 | -2.434839092 | -27.048710300 | -15.431920289 | 1 | 1 | 1 | # | ob  |
| 1965 | 12 | 7 | -0.950000 | -3.177442343 | 26.728240996  | -17.652417115 | 1 | 0 | 1 | # | oh  |
| 1966 | 12 | 4 | -1.050000 | -0.509618349 | 26.731276970  | -15.603517583 | 1 | 0 | 1 | # | ob  |
| 1967 | 12 | 7 | -0.950000 | -0.589092343 | -24.453609004 | -17.652417115 | 1 | 1 | 1 | # | oh  |
| 1968 | 12 | 4 | -1.050000 | -3.097968349 | -24.450573030 | -15.603517583 | 1 | 1 | 1 | # | ob  |
| 1969 | 12 | 5 | -0.950000 | -1.999257657 | -20.000940996 | 17.652417115  | 1 | 1 | 0 | # | oho |
| 1970 | 12 | 6 | -0.950000 | -4.667081651 | -20.003976970 | 15.603517583  | 1 | 1 | 0 | # | oht |
| 1971 | 12 | 7 | -0.950000 | -4.587607657 | -24.455490996 | 17.652417115  | 1 | 1 | 0 | # | oh  |
| 1972 | 12 | 4 | -1.050000 | -2.078731651 | -24.458526970 | 15.603517583  | 1 | 1 | 0 | # | ob  |
| 1973 | 12 | 4 | -1.050000 | -0.981894487 | -27.228199320 | -17.631368622 | 1 | 1 | 1 | # | ob  |
| 1974 | 12 | 4 | -1.050000 | -5.023189092 | -22.594160300 | -15.431920289 | 1 | 1 | 1 | # | ob  |
| 1975 | 12 | 4 | -1.050000 | -1.607035345 | -22.777048519 | 17.631577932  | 1 | 1 | 0 | # | ob  |
| 1976 | 12 | 4 | -1.050000 | -2.741532736 | -27.058553874 | 15.433153738  | 1 | 1 | 0 | # | ob  |
| 1977 | 12 | 8 | 2.100000  | -0.953702986 | -27.381980796 | -16.002222830 | 1 | 1 | 1 | # | st  |
| 1978 | 12 | 8 | 2.100000  | -1.634672226 | -22.935729218 | 16.003201903  | 1 | 1 | 0 | # | st  |
| 1979 | 12 | 8 | 2.100000  | -4.222997014 | -21.527119204 | 16.002222830  | 1 | 1 | 0 | # | st  |
| 1980 | 12 | 8 | 2.100000  | -1.634647014 | -25.981669204 | 16.002222830  | 1 | 1 | 0 | # | st  |
| 1981 | 12 | 8 | 2.100000  | -0.953677774 | -21.518820782 | -16.003201903 | 1 | 1 | 1 | # | st  |
| 1982 | 12 | 8 | 2.100000  | -3.542027774 | -25.973370782 | -16.003201903 | 1 | 1 | 1 | # | st  |
| 1983 | 12 | 8 | 2.100000  | -3.542052986 | -22.927430796 | -16.002222830 | 1 | 1 | 1 | # | st  |
| 1984 | 12 | 8 | 2.100000  | -4.223022226 | -27.390279218 | 16.003201903  | 1 | 1 | 0 | # | st  |
| 1985 | 12 | 6 | -0.950000 | -0.439233573 | -19.680858114 | -6.743779050  | 1 | 1 | 1 | # | oht |
| 1986 | 12 | 6 | -0.950000 | -4.871761797 | -0.272172439  | -12.134227113 | 1 | 0 | 1 | # | oht |
| 1987 | 12 | 3 | 0.425000  | -5.220127747 | -1.308055357  | -12.328360493 | 1 | 0 | 1 | # | do  |
| 1988 | 12 | 3 | 0.425000  | -0.176711381 | -1.054326608  | -6.235429463  | 1 | 0 | 1 | # | do  |
| 1989 | 12 | 3 | 0.425000  | -0.312851036 | -18.596754758 | -6.945886456  | 1 | 1 | 1 | # | do  |
| 1990 | 12 | 3 | 0.425000  | -5.063651085 | -19.012312375 | -12.696363051 | 1 | 1 | 1 | # | do  |
| 1991 | 13 | 1 | 1.575000  | 2.588555029  | 1.474661568   | -9.332229368  | 0 | 0 | 1 | # | ao  |
| 1992 | 13 | 1 | 1.575000  | 0.000205029  | 5.929211568   | -9.332229368  | 0 | 0 | 1 | # | ao  |
| 1993 | 13 | 1 | 1.575000  | 2.588144971  | 7.434438432   | -9.332770632  | 0 | 0 | 1 | # | ao  |
| 1994 | 13 | 1 | 1.575000  | 5.176494971  | 2.979888432   | -9.332770632  | 0 | 0 | 1 | # | ao  |
| 1995 | 13 | 2 | 0.425000  | 3.734650872  | 4.457267322   | -7.846384937  | 0 | 0 | 1 | # | ho  |
| 1996 | 13 | 3 | 0.425000  | 1.146300872  | 0.002717322   | -7.846384937  | 0 | 0 | 1 | # | do  |
| 1997 | 13 | 2 | 0.425000  | 1.442049128  | 4.451832678   | -10.818615063 | 0 | 0 | 1 | # | ho  |
| 1998 | 13 | 2 | 0.425000  | 4.030399128  | 8.906382678   | -10.818615063 | 0 | 0 | 1 | # | ho  |
| 1999 | 13 | 4 | -1.050000 | 0.981314655  | 1.677501481   | -10.365922068 | 0 | 0 | 1 | # | ob  |
| 2000 | 13 | 4 | -1.050000 | 5.023517264  | 6.305096126   | -12.564346262 | 0 | 0 | 1 | # | ob  |
| 2001 | 13 | 4 | -1.050000 | 3.570244487  | 2.773649320   | -10.366131378 | 0 | 0 | 1 | # | ob  |
| 2002 | 13 | 4 | -1.050000 | 2.434839092  | 7.048710300   | -12.565579711 | 0 | 0 | 1 | # | ob  |
| 2003 | 13 | 4 | -1.050000 | 0.981894487  | 7.228199320   | -10.366131378 | 0 | 0 | 1 | # | ob  |
| 2004 | 13 | 4 | -1.050000 | 1.606455513  | 6.135450680   | -8.298868622  | 0 | 0 | 1 | # | ob  |
| 2005 | 13 | 4 | -1.050000 | 5.023189092  | 2.594160300   | -12.565579711 | 0 | 0 | 1 | # | ob  |
| 2006 | 13 | 4 | -1.050000 | 1.607035345  | 2.777048519   | -8.299077932  | 0 | 0 | 1 | # | ob  |
| 2007 | 13 | 4 | -1.050000 | 2.741532736  | 7.058553874   | -6.100653738  | 0 | 0 | 1 | # | ob  |
| 2008 | 13 | 4 | -1.050000 | 4.195385345  | 7.231598519   | -8.299077932  | 0 | 0 | 1 | # | ob  |
| 2009 | 13 | 4 | -1.050000 | 0.153182736  | 2.604003874   | -6.100653738  | 0 | 0 | 1 | # | ob  |
| 2010 | 13 | 4 | -1.050000 | 2.741860908  | 1.860389700   | -6.099420289  | 0 | 0 | 1 | # | ob  |
| 2011 | 13 | 5 | -0.950000 | 1.999257657  | 0.000940996   | -8.319917115  | 0 | 0 | 1 | # | oho |
| 2012 | 13 | 6 | -0.950000 | 4.667081651  | 0.003976970   | -6.271017583  | 0 | 0 | 1 | # | oht |
| 2013 | 13 | 7 | -0.950000 | 4.587607657  | 4.455490996   | -8.319917115  | 0 | 0 | 1 | # | oh  |
| 2014 | 13 | 4 | -1.050000 | 2.078731651  | 4.458526970   | -6.271017583  | 0 | 0 | 1 | # | ob  |
| 2015 | 13 | 7 | -0.950000 | 3.177442343  | 8.908159004   | -10.345082885 | 0 | 0 | 1 | # | oh  |
| 2016 | 13 | 4 | -1.050000 | 0.509618349  | 8.905123030   | -12.393982417 | 0 | 0 | 1 | # | ob  |
| 2017 | 13 | 7 | -0.950000 | 0.589092343  | 4.453609004   | -10.345082885 | 0 | 0 | 1 | # | oh  |
| 2018 | 13 | 4 | -1.050000 | 3.097968349  | 4.450573030   | -12.393982417 | 0 | 0 | 1 | # | ob  |
| 2019 | 13 | 4 | -1.050000 | 4.194805513  | 1.680900680   | -8.298868622  | 0 | 0 | 1 | # | ob  |
| 2020 | 13 | 4 | -1.050000 | 0.153510908  | 6.314939700   | -6.099420289  | 0 | 0 | 1 | # | ob  |
| 2021 | 13 | 4 | -1.050000 | 3.569664655  | 6.132051481   | -10.365922068 | 0 | 0 | 1 | # | ob  |
| 2022 | 13 | 4 | -1.050000 | 2.435167264  | 1.850546126   | -12.564346262 | 0 | 0 | 1 | # | ob  |
| 2023 | 13 | 8 | 2.100000  | 4.222997014  | 1.527119204   | -6.669722830  | 0 | 0 | 1 | # | st  |
| 2024 | 13 | 8 | 2.100000  | 3.542027774  | 5.973370782   | -11.994298097 | 0 | 0 | 1 | # | st  |
| 2025 | 13 | 8 | 2.100000  | 0.953702986  | 7.381980796   | -11.995277170 | 0 | 0 | 1 | # | st  |
| 2026 | 13 | 8 | 2.100000  | 3.542052986  | 2.927430796   | -11.995277170 | 0 | 0 | 1 | # | st  |
| 2027 | 13 | 8 | 2.100000  | 4.223022226  | 7.390279218   | -6.670701903  | 0 | 0 | 1 | # | st  |
| 2028 | 13 | 8 | 2.100000  | 1.634672226  | 2.935729218   | -6.670701903  | 0 | 0 | 1 | # | st  |
| 2029 | 13 | 8 | 2.100000  | 1.634647014  | 5.981669204   | -6.669722830  | 0 | 0 | 1 | # | st  |
| 2030 | 13 | 8 | 2.100000  | 0.953677774  | 1.518820782   | -11.994298097 | 0 | 0 | 1 | # | st  |
| 2031 | 13 | 1 | 1.575000  | 2.588555029  | 10.383761568  | -9.332229368  | 0 | 0 | 1 | # | ao  |
| 2032 | 13 | 1 | 1.575000  | 0.000205029  | 14.838311568  | -9.332229368  | 0 | 0 | 1 | # | ao  |
| 2033 | 13 | 1 | 1.575000  | 2.588144971  | 16.343538432  | -9.332770632  | 0 | 0 | 1 | # | ao  |
| 2034 | 13 | 1 | 1.575000  | 5.176494971  | 11.888988432  | -9.332770632  | 0 | 0 | 1 | # | ao  |
| 2035 | 13 | 2 | 0.425000  | 3.734650872  | 13.366367322  | -7.846384937  | 0 | 0 | 1 | # | ho  |
| 2036 | 13 | 2 | 0.425000  | 1.146300872  | 8.911817322   | -7.846384937  | 0 | 0 | 1 | # | ho  |
| 2037 | 13 | 2 | 0.425000  | 1.442049128  | 13.360932678  | -10.818615063 | 0 | 0 | 1 | # | ho  |
| 2038 | 13 | 2 | 0.425000  | 4.030399128  | 17.815482678  | -10.818615063 | 0 | 0 | 1 | # | ho  |

|      |    |   |           |             |               |               |   |   |   |    |    |
|------|----|---|-----------|-------------|---------------|---------------|---|---|---|----|----|
| 2039 | 13 | 4 | -1.050000 | 0.981314655 | 10.586601481  | -10.365922068 | 0 | 0 | 1 | #  | ob |
| 2040 | 13 | 4 | -1.050000 | 5.023517264 | 15.214196126  | -12.564346262 | 0 | 0 | 1 | #  | ob |
| 2041 | 13 | 4 | -1.050000 | 3.570244487 | 11.682749320  | -10.366131378 | 0 | 0 | 1 | #  | ob |
| 2042 | 13 | 4 | -1.050000 | 2.434839092 | 15.957810300  | -12.565579711 | 0 | 0 | 1 | #  | ob |
| 2043 | 13 | 4 | -1.050000 | 0.981894487 | 16.137299320  | -10.366131378 | 0 | 0 | 1 | #  | ob |
| 2044 | 13 | 4 | -1.050000 | 1.606455513 | 15.044550680  | -8.298868622  | 0 | 0 | 1 | #  | ob |
| 2045 | 13 | 4 | -1.050000 | 5.023189092 | 11.503260300  | -12.565579711 | 0 | 0 | 1 | #  | ob |
| 2046 | 13 | 4 | -1.050000 | 1.607035345 | 11.686148519  | -8.299077932  | 0 | 0 | 1 | #  | ob |
| 2047 | 13 | 4 | -1.050000 | 2.741532736 | 15.967653874  | -6.100653738  | 0 | 0 | 1 | #  | ob |
| 2048 | 13 | 4 | -1.050000 | 4.195385345 | 16.140698519  | -8.299077932  | 0 | 0 | 1 | #  | ob |
| 2049 | 13 | 4 | -1.050000 | 0.153182736 | 11.513103874  | -6.100653738  | 0 | 0 | 1 | #  | ob |
| 2050 | 13 | 4 | -1.050000 | 2.741860908 | 10.769489700  | -6.099420289  | 0 | 0 | 1 | #  | ob |
| 2051 | 13 | 7 | -0.950000 | 1.999257657 | 8.910040996   | -8.319917115  | 0 | 0 | 1 | #  | oh |
| 2052 | 13 | 4 | -1.050000 | 4.667081651 | 8.913076970   | -6.271017583  | 0 | 0 | 1 | #  | ob |
| 2053 | 13 | 7 | -0.950000 | 4.587607657 | 13.364590996  | -8.319917115  | 0 | 0 | 1 | #  | oh |
| 2054 | 13 | 4 | -1.050000 | 2.078731651 | 13.367626970  | -6.271017583  | 0 | 0 | 1 | #  | ob |
| 2055 | 13 | 7 | -0.950000 | 3.177442343 | 17.817259004  | -10.345082885 | 0 | 0 | 1 | #  | oh |
| 2056 | 13 | 4 | -1.050000 | 0.509618349 | 17.814223030  | -12.393982417 | 0 | 0 | 1 | #  | ob |
| 2057 | 13 | 7 | -0.950000 | 0.589092343 | 13.362709004  | -10.345082885 | 0 | 0 | 1 | #  | oh |
| 2058 | 13 | 4 | -1.050000 | 3.097968349 | 13.359673030  | -12.393982417 | 0 | 0 | 1 | #  | ob |
| 2059 | 13 | 4 | -1.050000 | 4.194805513 | 10.590000680  | -8.298868622  | 0 | 0 | 1 | #  | ob |
| 2060 | 13 | 4 | -1.050000 | 0.153510908 | 15.224039700  | -6.099420289  | 0 | 0 | 1 | #  | ob |
| 2061 | 13 | 4 | -1.050000 | 3.569664655 | 15.041151481  | -10.365922068 | 0 | 0 | 1 | #  | ob |
| 2062 | 13 | 4 | -1.050000 | 2.435167264 | 10.759646126  | -12.564346262 | 0 | 0 | 1 | #  | ob |
| 2063 | 13 | 8 | 2.100000  | 4.222997014 | 10.436219204  | -6.669722830  | 0 | 0 | 1 | #  | st |
| 2064 | 13 | 8 | 2.100000  | 3.542027774 | 14.882470782  | -11.994298097 | 0 | 0 | 1 | #  | st |
| 2065 | 13 | 8 | 2.100000  | 0.953702986 | 16.291080796  | -11.995277170 | 0 | 0 | 1 | #  | st |
| 2066 | 13 | 8 | 2.100000  | 3.542052986 | 11.836530796  | -11.995277170 | 0 | 0 | 1 | #  | st |
| 2067 | 13 | 8 | 2.100000  | 4.223022226 | 16.299379218  | -6.670701903  | 0 | 0 | 1 | #  | st |
| 2068 | 13 | 8 | 2.100000  | 1.634672226 | 11.844829218  | -6.670701903  | 0 | 0 | 1 | #  | st |
| 2069 | 13 | 8 | 2.100000  | 1.634647014 | 14.890769204  | -6.669722830  | 0 | 0 | 1 | #  | st |
| 2070 | 13 | 8 | 2.100000  | 0.953677774 | 10.427920782  | -11.994298097 | 0 | 0 | 1 | #  | st |
| 2071 | 13 | 1 | 1.575000  | 2.588555029 | 19.292861568  | -9.332229368  | 0 | 1 | # | ao |    |
| 2072 | 13 | 1 | 1.575000  | 0.000205029 | 23.747411568  | -9.332229368  | 0 | 1 | # | ao |    |
| 2073 | 13 | 1 | 1.575000  | 2.588144971 | 25.252638432  | -9.332770632  | 0 | 1 | # | ao |    |
| 2074 | 13 | 1 | 1.575000  | 5.176494971 | 20.798088432  | -9.332770632  | 0 | 1 | # | ao |    |
| 2075 | 13 | 2 | 0.425000  | 3.734650872 | 22.275467322  | -7.846384937  | 0 | 1 | # | ho |    |
| 2076 | 13 | 2 | 0.425000  | 1.146300872 | 17.820917322  | -7.846384937  | 0 | 1 | # | ho |    |
| 2077 | 13 | 2 | 0.425000  | 1.442049128 | 22.270032678  | -10.818615063 | 0 | 1 | # | ho |    |
| 2078 | 13 | 2 | 0.425000  | 4.030399128 | 26.724582678  | -10.818615063 | 0 | 1 | # | ho |    |
| 2079 | 13 | 4 | -1.050000 | 0.981314655 | 19.495701481  | -10.365922068 | 0 | 0 | 1 | #  | ob |
| 2080 | 13 | 4 | -1.050000 | 5.023517264 | 24.123296126  | -12.564346262 | 0 | 0 | 1 | #  | ob |
| 2081 | 13 | 4 | -1.050000 | 3.570244487 | 20.591849320  | -10.366131378 | 0 | 0 | 1 | #  | ob |
| 2082 | 13 | 4 | -1.050000 | 2.434839092 | 24.866910300  | -12.565579711 | 0 | 0 | 1 | #  | ob |
| 2083 | 13 | 4 | -1.050000 | 0.981894487 | 25.046399320  | -10.366131378 | 0 | 0 | 1 | #  | ob |
| 2084 | 13 | 4 | -1.050000 | 1.606455513 | 23.953650680  | -8.298868622  | 0 | 0 | 1 | #  | ob |
| 2085 | 13 | 4 | -1.050000 | 5.023189092 | 20.412360300  | -12.565579711 | 0 | 0 | 1 | #  | ob |
| 2086 | 13 | 4 | -1.050000 | 1.607035345 | 20.595248519  | -8.299077932  | 0 | 0 | 1 | #  | ob |
| 2087 | 13 | 4 | -1.050000 | 2.741532736 | 24.876753874  | -6.100653738  | 0 | 0 | 1 | #  | ob |
| 2088 | 13 | 4 | -1.050000 | 4.195385345 | 25.049798519  | -8.299077932  | 0 | 0 | 1 | #  | ob |
| 2089 | 13 | 4 | -1.050000 | 0.153182736 | 20.422203874  | -6.100653738  | 0 | 0 | 1 | #  | ob |
| 2090 | 13 | 4 | -1.050000 | 2.741860908 | 19.678589700  | -6.099420289  | 0 | 0 | 1 | #  | ob |
| 2091 | 13 | 7 | -0.950000 | 1.999257657 | 17.819140996  | -8.319917115  | 0 | 0 | 1 | #  | oh |
| 2092 | 13 | 4 | -1.050000 | 4.667081651 | 17.822176970  | -6.271017583  | 0 | 0 | 1 | #  | ob |
| 2093 | 13 | 7 | -0.950000 | 4.587607657 | 22.273690996  | -8.319917115  | 0 | 0 | 1 | #  | oh |
| 2094 | 13 | 4 | -1.050000 | 2.078731651 | 22.276726970  | -6.271017583  | 0 | 0 | 1 | #  | ob |
| 2095 | 13 | 7 | -0.950000 | 3.177442343 | 26.726359004  | -10.345082885 | 0 | 0 | 1 | #  | oh |
| 2096 | 13 | 4 | -1.050000 | 0.509618349 | 26.723323030  | -12.393982417 | 0 | 0 | 1 | #  | ob |
| 2097 | 13 | 7 | -0.950000 | 0.589092343 | 22.271809004  | -10.345082885 | 0 | 0 | 1 | #  | oh |
| 2098 | 13 | 4 | -1.050000 | 3.097968349 | 22.268773030  | -12.393982417 | 0 | 0 | 1 | #  | ob |
| 2099 | 13 | 4 | -1.050000 | 4.194805513 | 19.499100680  | -8.298868622  | 0 | 0 | 1 | #  | ob |
| 2100 | 13 | 4 | -1.050000 | 0.153510908 | 24.133139700  | -6.099420289  | 0 | 0 | 1 | #  | ob |
| 2101 | 13 | 4 | -1.050000 | 3.569664655 | 23.950251481  | -10.365922068 | 0 | 0 | 1 | #  | ob |
| 2102 | 13 | 4 | -1.050000 | 2.435167264 | 19.668746126  | -12.564346262 | 0 | 0 | 1 | #  | ob |
| 2103 | 13 | 8 | 2.100000  | 4.222997014 | 19.345319204  | -6.669722830  | 0 | 0 | 1 | #  | st |
| 2104 | 13 | 8 | 2.100000  | 3.542027774 | 23.791570782  | -11.994298097 | 0 | 0 | 1 | #  | st |
| 2105 | 13 | 8 | 2.100000  | 0.953702986 | 25.200180796  | -11.995277170 | 0 | 0 | 1 | #  | st |
| 2106 | 13 | 8 | 2.100000  | 3.542052986 | 20.745630796  | -11.995277170 | 0 | 0 | 1 | #  | st |
| 2107 | 13 | 8 | 2.100000  | 4.223022226 | 25.208479218  | -6.670701903  | 0 | 0 | 1 | #  | st |
| 2108 | 13 | 8 | 2.100000  | 1.634672226 | 20.753929218  | -6.670701903  | 0 | 0 | 1 | #  | st |
| 2109 | 13 | 8 | 2.100000  | 1.634647014 | 23.799869204  | -6.669722830  | 0 | 0 | 1 | #  | st |
| 2110 | 13 | 8 | 2.100000  | 0.953677774 | 19.337020782  | -11.994298097 | 0 | 0 | 1 | #  | st |
| 2111 | 13 | 1 | 1.575000  | 2.588555029 | -27.434438432 | -9.332229368  | 0 | 1 | # | ao |    |
| 2112 | 13 | 1 | 1.575000  | 0.000205029 | -22.979888432 | -9.332229368  | 0 | 1 | # | ao |    |
| 2113 | 13 | 1 | 1.575000  | 2.588144971 | -21.474661568 | -9.332770632  | 0 | 1 | # | ao |    |
| 2114 | 13 | 1 | 1.575000  | 5.176494971 | -25.929211568 | -9.332770632  | 0 | 1 | # | ao |    |
| 2115 | 13 | 2 | 0.425000  | 3.734650872 | -24.451832678 | -7.846384937  | 0 | 1 | # | ho |    |
| 2116 | 13 | 2 | 0.425000  | 1.146300872 | 26.730017322  | -7.846384937  | 0 | 1 | # | ho |    |
| 2117 | 13 | 2 | 0.425000  | 1.442049128 | -24.457267322 | -10.818615063 | 0 | 1 | # | ho |    |
| 2118 | 13 | 3 | 0.425000  | 4.030399128 | -20.002717322 | -10.818615063 | 0 | 1 | # | do |    |
| 2119 | 13 | 4 | -1.050000 | 0.981314655 | -27.231598519 | -10.365922068 | 0 | 1 | # | ob |    |
| 2120 | 13 | 4 | -1.050000 | 5.023517264 | -22.604003874 | -12.564346262 | 0 | 1 | # | ob |    |
| 2121 | 13 | 4 | -1.050000 | 3.570244487 | -26.135450680 | -10.366131378 | 0 | 1 | # | ob |    |
| 2122 | 13 | 4 | -1.050000 | 2.434839092 | -21.860389700 | -12.565579711 | 0 | 1 | # | ob |    |
| 2123 | 13 | 4 | -1.050000 | 0.981894487 | -21.680900680 | -10.366131378 | 0 | 1 | # | ob |    |
| 2124 | 13 | 4 | -1.050000 | 1.606455513 | -22.773649320 | -8.298868622  | 0 | 1 | # | ob |    |
| 2125 | 13 | 4 | -1.050000 | 5.023189092 | -26.314939700 | -12.565579711 | 0 | 1 | # | ob |    |
| 2126 | 13 | 4 | -1.050000 | 1.607035345 | -26.132051481 | -8.299077932  | 0 | 1 | # | ob |    |
| 2127 | 13 | 4 | -1.050000 | 2.741532736 | -21.850546126 | -6.100653738  | 0 | 1 | # | ob |    |
| 2128 | 13 | 4 | -1.050000 | 4.195385345 | -21.677501481 | -8.299077932  | 0 | 1 | # | ob |    |
| 2129 | 13 | 4 | -1.050000 | 0.153182736 | -26.305096126 | -6.100653738  | 0 | 1 | # | ob |    |
| 2130 | 13 | 4 | -1.050000 | 2.741860908 | -27.048710300 | -6.099420289  | 0 | 1 | # | ob |    |
| 2131 | 13 | 7 | -0.950000 | 1.999257657 | 26.728240996  | -8.319917115  | 0 | 0 | 1 | #  | oh |



|      |    |   |           |              |               |               |   |   |   |   |     |
|------|----|---|-----------|--------------|---------------|---------------|---|---|---|---|-----|
| 2132 | 13 | 4 | -1.050000 | 4.667081651  | 26.731276970  | -6.271017583  | 0 | 0 | 1 | # | ob  |
| 2133 | 13 | 7 | -0.950000 | 4.587607657  | -24.453609004 | -8.319917115  | 0 | 1 | 1 | # | oh  |
| 2134 | 13 | 4 | -1.050000 | 2.078731651  | -24.450573030 | -6.271017583  | 0 | 1 | 1 | # | ob  |
| 2135 | 13 | 5 | -0.950000 | 3.177442343  | -20.000940996 | -10.345082885 | 0 | 1 | 1 | # | oho |
| 2136 | 13 | 6 | -0.950000 | 0.509618349  | -20.003976970 | -12.393982417 | 0 | 1 | 1 | # | oht |
| 2137 | 13 | 7 | -0.950000 | 0.589092343  | -24.455490996 | -10.345082885 | 0 | 1 | 1 | # | oh  |
| 2138 | 13 | 4 | -1.050000 | 3.097968349  | -24.458526970 | -12.393982417 | 0 | 1 | 1 | # | ob  |
| 2139 | 13 | 4 | -1.050000 | 4.194805513  | -27.228199320 | -8.298868622  | 0 | 1 | 1 | # | ob  |
| 2140 | 13 | 4 | -1.050000 | 0.153510908  | -22.594160300 | -6.099420289  | 0 | 1 | 1 | # | ob  |
| 2141 | 13 | 4 | -1.050000 | 3.569664655  | -22.777048519 | -10.365922068 | 0 | 1 | 1 | # | ob  |
| 2142 | 13 | 4 | -1.050000 | 2.435167264  | -27.058553874 | -12.564346262 | 0 | 1 | 1 | # | ob  |
| 2143 | 13 | 8 | 2.100000  | 4.222997014  | -27.381980796 | -6.669722830  | 0 | 1 | 1 | # | st  |
| 2144 | 13 | 8 | 2.100000  | 3.542027774  | -22.935729218 | -11.994298097 | 0 | 1 | 1 | # | st  |
| 2145 | 13 | 8 | 2.100000  | 0.953702986  | -21.527119204 | -11.995277170 | 0 | 1 | 1 | # | st  |
| 2146 | 13 | 8 | 2.100000  | 3.542052986  | -25.981669204 | -11.995277170 | 0 | 1 | 1 | # | st  |
| 2147 | 13 | 8 | 2.100000  | 4.223022226  | -21.518820782 | -6.670701903  | 0 | 1 | 1 | # | st  |
| 2148 | 13 | 8 | 2.100000  | 1.634672226  | -25.973370782 | -6.670701903  | 0 | 1 | 1 | # | st  |
| 2149 | 13 | 8 | 2.100000  | 1.634647014  | -22.927430796 | -6.669722830  | 0 | 1 | 1 | # | st  |
| 2150 | 13 | 8 | 2.100000  | 0.953677774  | -27.390279218 | -11.994298097 | 0 | 1 | 1 | # | st  |
| 2151 | 13 | 6 | -0.950000 | 4.737466427  | -19.680858114 | 2.588720950   | 0 | 1 | 1 | # | oht |
| 2152 | 13 | 6 | -0.950000 | 0.304938203  | -0.272172439  | -2.801727113  | 0 | 1 | 1 | # | oht |
| 2153 | 13 | 3 | 0.425000  | 4.999988619  | -1.054326608  | 3.097070537   | 0 | 0 | 1 | # | do  |
| 2154 | 13 | 3 | 0.425000  | 4.863848964  | -18.596754758 | 2.386613544   | 0 | 1 | 1 | # | do  |
| 2155 | 13 | 3 | 0.425000  | 0.113048915  | -19.012312375 | -3.363863051  | 0 | 1 | 1 | # | do  |
| 2156 | 14 | 1 | 1.575000  | 7.765255029  | 1.474661568   | -9.332229368  | 0 | 0 | 1 | # | ao  |
| 2157 | 14 | 1 | 1.575000  | 5.176905029  | 5.929211568   | -9.332229368  | 0 | 0 | 1 | # | ao  |
| 2158 | 14 | 1 | 1.575000  | 7.764844971  | 7.434438432   | -9.332770632  | 0 | 0 | 1 | # | ao  |
| 2159 | 14 | 1 | 1.575000  | 10.353194971 | 2.979888432   | -9.332770632  | 0 | 0 | 1 | # | ao  |
| 2160 | 14 | 2 | 0.425000  | 8.911350872  | 4.457267322   | -7.846384937  | 0 | 0 | 1 | # | ho  |
| 2161 | 14 | 3 | 0.425000  | 6.323000872  | 0.002717322   | -7.846384937  | 0 | 0 | 1 | # | do  |
| 2162 | 14 | 2 | 0.425000  | 6.618749128  | 4.451832678   | -10.818615063 | 0 | 0 | 1 | # | ho  |
| 2163 | 14 | 2 | 0.425000  | 9.207099128  | 8.906382678   | -10.818615063 | 0 | 0 | 1 | # | ho  |
| 2164 | 14 | 4 | -1.050000 | 6.158014655  | 1.677501481   | -10.365922068 | 0 | 0 | 1 | # | ob  |
| 2165 | 14 | 4 | -1.050000 | 10.200217264 | 6.305096126   | -12.564346262 | 0 | 0 | 1 | # | ob  |
| 2166 | 14 | 4 | -1.050000 | 8.746944487  | 2.773649320   | -10.366131378 | 0 | 0 | 1 | # | ob  |
| 2167 | 14 | 4 | -1.050000 | 7.611539092  | 7.048710300   | -12.565579711 | 0 | 0 | 1 | # | ob  |
| 2168 | 14 | 4 | -1.050000 | 6.158594487  | 7.228199320   | -10.366131378 | 0 | 0 | 1 | # | ob  |
| 2169 | 14 | 4 | -1.050000 | 6.783155513  | 6.135450680   | -8.298868622  | 0 | 0 | 1 | # | ob  |
| 2170 | 14 | 4 | -1.050000 | 10.199889092 | 2.594160300   | -12.565579711 | 0 | 0 | 1 | # | ob  |
| 2171 | 14 | 4 | -1.050000 | 6.783735345  | 2.777048519   | -8.299077932  | 0 | 0 | 1 | # | ob  |
| 2172 | 14 | 4 | -1.050000 | 7.918232736  | 7.058553874   | -6.100653738  | 0 | 0 | 1 | # | ob  |
| 2173 | 14 | 4 | -1.050000 | 9.372085345  | 7.231598519   | -8.299077932  | 0 | 0 | 1 | # | ob  |
| 2174 | 14 | 4 | -1.050000 | 5.329882736  | 2.604003874   | -6.100653738  | 0 | 0 | 1 | # | ob  |
| 2175 | 14 | 4 | -1.050000 | 7.918560908  | 1.860389700   | -6.099420289  | 0 | 0 | 1 | # | ob  |
| 2176 | 14 | 5 | -0.950000 | 7.175957657  | 0.000940996   | -8.319917115  | 0 | 0 | 1 | # | oho |
| 2177 | 14 | 6 | -0.950000 | 9.843781651  | 0.003976970   | -6.271017583  | 0 | 0 | 1 | # | oht |
| 2178 | 14 | 7 | -0.950000 | 9.764307657  | 4.455490996   | -8.319917115  | 0 | 0 | 1 | # | oh  |
| 2179 | 14 | 4 | -1.050000 | 7.255431651  | 4.458526970   | -6.271017583  | 0 | 0 | 1 | # | ob  |
| 2180 | 14 | 7 | -0.950000 | 8.354142343  | 8.908159004   | -10.345082885 | 0 | 0 | 1 | # | oh  |
| 2181 | 14 | 4 | -1.050000 | 5.686318349  | 8.905123030   | -12.393982417 | 0 | 0 | 1 | # | ob  |
| 2182 | 14 | 7 | -0.950000 | 5.765792343  | 4.453609004   | -10.345082885 | 0 | 0 | 1 | # | oh  |
| 2183 | 14 | 4 | -1.050000 | 8.274668349  | 4.450573030   | -12.393982417 | 0 | 0 | 1 | # | ob  |
| 2184 | 14 | 4 | -1.050000 | 9.371505513  | 1.680900680   | -8.298868622  | 0 | 0 | 1 | # | ob  |
| 2185 | 14 | 4 | -1.050000 | 5.330210908  | 6.314939700   | -6.099420289  | 0 | 0 | 1 | # | ob  |
| 2186 | 14 | 4 | -1.050000 | 8.746364655  | 6.132051481   | -10.365922068 | 0 | 0 | 1 | # | ob  |
| 2187 | 14 | 4 | -1.050000 | 7.611867264  | 1.850546126   | -12.564346262 | 0 | 0 | 1 | # | ob  |
| 2188 | 14 | 8 | 2.100000  | 9.399697014  | 1.527119204   | -6.669722830  | 0 | 0 | 1 | # | st  |
| 2189 | 14 | 8 | 2.100000  | 8.718727774  | 5.973370782   | -11.994298097 | 0 | 0 | 1 | # | st  |
| 2190 | 14 | 8 | 2.100000  | 6.130402986  | 7.381980796   | -11.995277170 | 0 | 0 | 1 | # | st  |
| 2191 | 14 | 8 | 2.100000  | 8.718752986  | 2.927430796   | -11.995277170 | 0 | 0 | 1 | # | st  |
| 2192 | 14 | 8 | 2.100000  | 9.399722226  | 7.390279218   | -6.670701903  | 0 | 0 | 1 | # | st  |
| 2193 | 14 | 8 | 2.100000  | 6.811372226  | 2.935729218   | -6.670701903  | 0 | 0 | 1 | # | st  |
| 2194 | 14 | 8 | 2.100000  | 6.811347014  | 5.981669204   | -6.669722830  | 0 | 0 | 1 | # | st  |
| 2195 | 14 | 8 | 2.100000  | 6.130377774  | 1.518820782   | -11.994298097 | 0 | 0 | 1 | # | st  |
| 2196 | 14 | 1 | 1.575000  | 7.765255029  | 10.383761568  | -9.332229368  | 0 | 0 | 1 | # | ao  |
| 2197 | 14 | 1 | 1.575000  | 5.176905029  | 14.838311568  | -9.332229368  | 0 | 0 | 1 | # | ao  |
| 2198 | 14 | 1 | 1.575000  | 7.764844971  | 16.343538432  | -9.332770632  | 0 | 0 | 1 | # | ao  |
| 2199 | 14 | 1 | 1.575000  | 10.353194971 | 11.888988432  | -9.332770632  | 0 | 0 | 1 | # | ao  |
| 2200 | 14 | 2 | 0.425000  | 8.911350872  | 13.366367322  | -7.846384937  | 0 | 0 | 1 | # | ho  |
| 2201 | 14 | 2 | 0.425000  | 6.323000872  | 8.911817322   | -7.846384937  | 0 | 0 | 1 | # | ho  |
| 2202 | 14 | 2 | 0.425000  | 6.618749128  | 13.360932678  | -10.818615063 | 0 | 0 | 1 | # | ho  |
| 2203 | 14 | 2 | 0.425000  | 9.207099128  | 17.815482678  | -10.818615063 | 0 | 0 | 1 | # | ho  |
| 2204 | 14 | 4 | -1.050000 | 6.158014655  | 10.586601481  | -10.365922068 | 0 | 0 | 1 | # | ob  |
| 2205 | 14 | 4 | -1.050000 | 10.200217264 | 15.214196126  | -12.564346262 | 0 | 0 | 1 | # | ob  |
| 2206 | 14 | 4 | -1.050000 | 8.746944487  | 11.682749320  | -10.366131378 | 0 | 0 | 1 | # | ob  |
| 2207 | 14 | 4 | -1.050000 | 7.611539092  | 15.957810300  | -12.565579711 | 0 | 0 | 1 | # | ob  |
| 2208 | 14 | 4 | -1.050000 | 6.158594487  | 16.137299320  | -10.366131378 | 0 | 0 | 1 | # | ob  |
| 2209 | 14 | 4 | -1.050000 | 6.783155513  | 15.044550680  | -8.298868622  | 0 | 0 | 1 | # | ob  |
| 2210 | 14 | 4 | -1.050000 | 10.199889092 | 11.503260300  | -12.565579711 | 0 | 0 | 1 | # | ob  |
| 2211 | 14 | 4 | -1.050000 | 6.783735345  | 11.686148519  | -8.299077932  | 0 | 0 | 1 | # | ob  |
| 2212 | 14 | 4 | -1.050000 | 7.918232736  | 15.967653874  | -6.100653738  | 0 | 0 | 1 | # | ob  |
| 2213 | 14 | 4 | -1.050000 | 9.372085345  | 16.140698519  | -8.299077932  | 0 | 0 | 1 | # | ob  |
| 2214 | 14 | 4 | -1.050000 | 5.329882736  | 11.513103874  | -6.100653738  | 0 | 0 | 1 | # | ob  |
| 2215 | 14 | 4 | -1.050000 | 7.918560908  | 10.769489700  | -6.099420289  | 0 | 0 | 1 | # | ob  |
| 2216 | 14 | 7 | -0.950000 | 7.175957657  | 8.910040996   | -8.319917115  | 0 | 0 | 1 | # | oh  |
| 2217 | 14 | 4 | -1.050000 | 9.843781651  | 8.913076970   | -6.271017583  | 0 | 0 | 1 | # | ob  |
| 2218 | 14 | 7 | -0.950000 | 9.764307657  | 13.364590996  | -8.319917115  | 0 | 0 | 1 | # | oh  |
| 2219 | 14 | 4 | -1.050000 | 7.255431651  | 13.367626970  | -6.271017583  | 0 | 0 | 1 | # | ob  |
| 2220 | 14 | 7 | -0.950000 | 8.354142343  | 17.817259004  | -10.345082885 | 0 | 0 | 1 | # | oh  |
| 2221 | 14 | 4 | -1.050000 | 5.686318349  | 17.814223030  | -12.393982417 | 0 | 0 | 1 | # | ob  |
| 2222 | 14 | 7 | -0.950000 | 5.765792343  | 13.362709004  | -10.345082885 | 0 | 0 | 1 | # | oh  |
| 2223 | 14 | 4 | -1.050000 | 8.274668349  | 13.359673030  | -12.393982417 | 0 | 0 | 1 | # | ob  |
| 2224 | 14 | 4 | -1.050000 | 9.371505513  | 10.590000680  | -8.298868622  | 0 | 0 | 1 | # | ob  |

|      |    |   |           |              |               |               |   |   |   |   |     |
|------|----|---|-----------|--------------|---------------|---------------|---|---|---|---|-----|
| 2225 | 14 | 4 | -1.050000 | 5.330210908  | 15.224039700  | -6.099420289  | 0 | 0 | 1 | # | ob  |
| 2226 | 14 | 4 | -1.050000 | 8.746364655  | 15.041151481  | -10.365922068 | 0 | 0 | 1 | # | ob  |
| 2227 | 14 | 4 | -1.050000 | 7.611867264  | 10.759646126  | -12.564346262 | 0 | 0 | 1 | # | ob  |
| 2228 | 14 | 8 | 2.100000  | 9.399697014  | 10.436219204  | -6.669722830  | 0 | 0 | 1 | # | st  |
| 2229 | 14 | 8 | 2.100000  | 8.718727774  | 14.882470782  | -11.994298097 | 0 | 0 | 1 | # | st  |
| 2230 | 14 | 8 | 2.100000  | 6.130402986  | 16.291080796  | -11.995277170 | 0 | 0 | 1 | # | st  |
| 2231 | 14 | 8 | 2.100000  | 8.718752986  | 11.836530796  | -11.995277170 | 0 | 0 | 1 | # | st  |
| 2232 | 14 | 8 | 2.100000  | 9.399722226  | 16.299379218  | -6.670701903  | 0 | 0 | 1 | # | st  |
| 2233 | 14 | 8 | 2.100000  | 6.811372226  | 11.844829218  | -6.670701903  | 0 | 0 | 1 | # | st  |
| 2234 | 14 | 8 | 2.100000  | 6.811347014  | 14.890769204  | -6.669722830  | 0 | 0 | 1 | # | st  |
| 2235 | 14 | 8 | 2.100000  | 6.130377774  | 10.427920782  | -11.994298097 | 0 | 0 | 1 | # | st  |
| 2236 | 14 | 1 | 1.575000  | 7.765255029  | 19.292861568  | -9.332229368  | 0 | 0 | 1 | # | ao  |
| 2237 | 14 | 1 | 1.575000  | 5.176905029  | 23.747411568  | -9.332229368  | 0 | 0 | 1 | # | ao  |
| 2238 | 14 | 1 | 1.575000  | 7.764844971  | 25.252638432  | -9.332770632  | 0 | 0 | 1 | # | ao  |
| 2239 | 14 | 1 | 1.575000  | 10.353194971 | 20.798088432  | -9.332770632  | 0 | 0 | 1 | # | ao  |
| 2240 | 14 | 2 | 0.425000  | 8.911350872  | 22.275467322  | -7.846384937  | 0 | 0 | 1 | # | ho  |
| 2241 | 14 | 2 | 0.425000  | 6.323000872  | 17.820917322  | -7.846384937  | 0 | 0 | 1 | # | ho  |
| 2242 | 14 | 2 | 0.425000  | 6.618749128  | 22.270032678  | -10.818615063 | 0 | 0 | 1 | # | ho  |
| 2243 | 14 | 2 | 0.425000  | 9.207099128  | 26.724582678  | -10.818615063 | 0 | 0 | 1 | # | ho  |
| 2244 | 14 | 4 | -1.050000 | 6.158014655  | 19.495701481  | -10.365922068 | 0 | 0 | 1 | # | ob  |
| 2245 | 14 | 4 | -1.050000 | 10.200217264 | 24.123296126  | -12.564346262 | 0 | 0 | 1 | # | ob  |
| 2246 | 14 | 4 | -1.050000 | 8.746944487  | 20.591849320  | -10.366131378 | 0 | 0 | 1 | # | ob  |
| 2247 | 14 | 4 | -1.050000 | 7.611539092  | 24.866910300  | -12.565579711 | 0 | 0 | 1 | # | ob  |
| 2248 | 14 | 4 | -1.050000 | 6.158594487  | 25.046399320  | -10.366131378 | 0 | 0 | 1 | # | ob  |
| 2249 | 14 | 4 | -1.050000 | 6.783155513  | 23.953650680  | -8.298868622  | 0 | 0 | 1 | # | ob  |
| 2250 | 14 | 4 | -1.050000 | 10.199889092 | 20.412360300  | -12.565579711 | 0 | 0 | 1 | # | ob  |
| 2251 | 14 | 4 | -1.050000 | 6.783735345  | 20.595248519  | -8.299077932  | 0 | 0 | 1 | # | ob  |
| 2252 | 14 | 4 | -1.050000 | 7.918232736  | 24.876753874  | -6.100653738  | 0 | 0 | 1 | # | ob  |
| 2253 | 14 | 4 | -1.050000 | 9.372085345  | 25.049798519  | -8.299077932  | 0 | 0 | 1 | # | ob  |
| 2254 | 14 | 4 | -1.050000 | 5.329882736  | 20.422203874  | -6.100653738  | 0 | 0 | 1 | # | ob  |
| 2255 | 14 | 4 | -1.050000 | 7.918560908  | 19.678589700  | -6.099420289  | 0 | 0 | 1 | # | ob  |
| 2256 | 14 | 7 | -0.950000 | 7.175957657  | 17.819140996  | -8.319917115  | 0 | 0 | 1 | # | oh  |
| 2257 | 14 | 4 | -1.050000 | 9.843781651  | 17.822176970  | -6.271017583  | 0 | 0 | 1 | # | ob  |
| 2258 | 14 | 7 | -0.950000 | 9.764307657  | 22.273690996  | -8.319917115  | 0 | 0 | 1 | # | oh  |
| 2259 | 14 | 4 | -1.050000 | 7.255431651  | 22.276726970  | -6.271017583  | 0 | 0 | 1 | # | ob  |
| 2260 | 14 | 7 | -0.950000 | 8.354142343  | 26.726359004  | -10.345082885 | 0 | 0 | 1 | # | oh  |
| 2261 | 14 | 4 | -1.050000 | 5.686318349  | 26.723323030  | -12.393982417 | 0 | 0 | 1 | # | ob  |
| 2262 | 14 | 7 | -0.950000 | 5.765792343  | 22.271809004  | -10.345082885 | 0 | 0 | 1 | # | oh  |
| 2263 | 14 | 4 | -1.050000 | 8.274668349  | 22.268773030  | -12.393982417 | 0 | 0 | 1 | # | ob  |
| 2264 | 14 | 4 | -1.050000 | 9.371505513  | 19.499100680  | -8.298868622  | 0 | 0 | 1 | # | ob  |
| 2265 | 14 | 4 | -1.050000 | 5.330210908  | 24.133139700  | -6.099420289  | 0 | 0 | 1 | # | ob  |
| 2266 | 14 | 4 | -1.050000 | 8.746364655  | 23.950251481  | -10.365922068 | 0 | 0 | 1 | # | ob  |
| 2267 | 14 | 4 | -1.050000 | 7.611867264  | 19.668746126  | -12.564346262 | 0 | 0 | 1 | # | ob  |
| 2268 | 14 | 8 | 2.100000  | 9.399697014  | 19.345319204  | -6.669722830  | 0 | 0 | 1 | # | st  |
| 2269 | 14 | 8 | 2.100000  | 8.718727774  | 23.791570782  | -11.994298097 | 0 | 0 | 1 | # | st  |
| 2270 | 14 | 8 | 2.100000  | 6.130402986  | 25.200180796  | -11.995277170 | 0 | 0 | 1 | # | st  |
| 2271 | 14 | 8 | 2.100000  | 8.718752986  | 20.745630796  | -11.995277170 | 0 | 0 | 1 | # | st  |
| 2272 | 14 | 8 | 2.100000  | 9.399722226  | 25.208479218  | -6.670701903  | 0 | 0 | 1 | # | st  |
| 2273 | 14 | 8 | 2.100000  | 6.811372226  | 20.753929218  | -6.670701903  | 0 | 0 | 1 | # | st  |
| 2274 | 14 | 8 | 2.100000  | 6.811347014  | 23.799869204  | -6.669722830  | 0 | 0 | 1 | # | st  |
| 2275 | 14 | 8 | 2.100000  | 6.130377774  | 19.337020782  | -11.994298097 | 0 | 0 | 1 | # | st  |
| 2276 | 14 | 1 | 1.575000  | 7.765255029  | -27.434438432 | -9.332229368  | 0 | 1 | 1 | # | ao  |
| 2277 | 14 | 1 | 1.575000  | 5.176905029  | -22.979888432 | -9.332229368  | 0 | 1 | 1 | # | ao  |
| 2278 | 14 | 1 | 1.575000  | 7.764844971  | -21.474661568 | -9.332770632  | 0 | 1 | 1 | # | ao  |
| 2279 | 14 | 1 | 1.575000  | 10.353194971 | -25.929211568 | -9.332770632  | 0 | 1 | 1 | # | ao  |
| 2280 | 14 | 2 | 0.425000  | 8.911350872  | -24.451832678 | -7.846384937  | 0 | 1 | 1 | # | ho  |
| 2281 | 14 | 2 | 0.425000  | 6.323000872  | 26.730017322  | -7.846384937  | 0 | 0 | 1 | # | ho  |
| 2282 | 14 | 2 | 0.425000  | 6.618749128  | -24.457267322 | -10.818615063 | 0 | 1 | 1 | # | ho  |
| 2283 | 14 | 3 | 0.425000  | 9.207099128  | -20.002717322 | -10.818615063 | 0 | 1 | 1 | # | do  |
| 2284 | 14 | 4 | -1.050000 | 6.158014655  | -27.231598519 | -10.365922068 | 0 | 1 | 1 | # | ob  |
| 2285 | 14 | 4 | -1.050000 | 10.200217264 | -22.604003874 | -12.564346262 | 0 | 1 | 1 | # | ob  |
| 2286 | 14 | 4 | -1.050000 | 8.746944487  | -26.135450680 | -10.366131378 | 0 | 1 | 1 | # | ob  |
| 2287 | 14 | 4 | -1.050000 | 7.611539092  | -21.860389700 | -12.565579711 | 0 | 1 | 1 | # | ob  |
| 2288 | 14 | 4 | -1.050000 | 6.158594487  | -21.680900680 | -10.366131378 | 0 | 1 | 1 | # | ob  |
| 2289 | 14 | 4 | -1.050000 | 6.783155513  | -22.773649320 | -8.298868622  | 0 | 1 | 1 | # | ob  |
| 2290 | 14 | 4 | -1.050000 | 10.199889092 | -26.314939700 | -12.565579711 | 0 | 1 | 1 | # | ob  |
| 2291 | 14 | 4 | -1.050000 | 6.783735345  | -26.132051481 | -8.299077932  | 0 | 1 | 1 | # | ob  |
| 2292 | 14 | 4 | -1.050000 | 7.918232736  | -21.850546126 | -6.100653738  | 0 | 1 | 1 | # | ob  |
| 2293 | 14 | 4 | -1.050000 | 9.372085345  | -21.677501481 | -8.299077932  | 0 | 1 | 1 | # | ob  |
| 2294 | 14 | 4 | -1.050000 | 5.329882736  | -26.305096126 | -6.100653738  | 0 | 1 | 1 | # | ob  |
| 2295 | 14 | 4 | -1.050000 | 7.918560908  | -27.048710300 | -6.099420289  | 0 | 1 | 1 | # | ob  |
| 2296 | 14 | 7 | -0.950000 | 7.175957657  | 26.728240996  | -8.319917115  | 0 | 0 | 1 | # | oh  |
| 2297 | 14 | 4 | -1.050000 | 9.843781651  | 26.731276970  | -6.271017583  | 0 | 0 | 1 | # | ob  |
| 2298 | 14 | 7 | -0.950000 | 9.764307657  | -24.453609004 | -8.319917115  | 0 | 1 | 1 | # | oh  |
| 2299 | 14 | 4 | -1.050000 | 7.255431651  | -24.450573030 | -6.271017583  | 0 | 1 | 1 | # | ob  |
| 2300 | 14 | 5 | -0.950000 | 8.354142343  | -20.000940996 | -10.345082885 | 0 | 1 | 1 | # | oh  |
| 2301 | 14 | 6 | -0.950000 | 5.686318349  | -20.003976970 | -12.393982417 | 0 | 1 | 1 | # | oh  |
| 2302 | 14 | 7 | -0.950000 | 5.765792343  | -24.455490996 | -10.345082885 | 0 | 1 | 1 | # | oh  |
| 2303 | 14 | 4 | -1.050000 | 8.274668349  | -24.458526970 | -12.393982417 | 0 | 1 | 1 | # | ob  |
| 2304 | 14 | 4 | -1.050000 | 9.371505513  | -27.228199320 | -8.298868622  | 0 | 1 | 1 | # | ob  |
| 2305 | 14 | 4 | -1.050000 | 5.330210908  | -22.594160300 | -6.099420289  | 0 | 1 | 1 | # | ob  |
| 2306 | 14 | 4 | -1.050000 | 8.746364655  | -22.777048519 | -10.365922068 | 0 | 1 | 1 | # | ob  |
| 2307 | 14 | 4 | -1.050000 | 7.611867264  | -27.058553874 | -12.564346262 | 0 | 1 | 1 | # | ob  |
| 2308 | 14 | 8 | 2.100000  | 9.399697014  | -27.381980796 | -6.669722830  | 0 | 1 | 1 | # | st  |
| 2309 | 14 | 8 | 2.100000  | 8.718727774  | -22.935729218 | -11.994298097 | 0 | 1 | 1 | # | st  |
| 2310 | 14 | 8 | 2.100000  | 6.130402986  | -21.527119204 | -11.995277170 | 0 | 1 | 1 | # | st  |
| 2311 | 14 | 8 | 2.100000  | 8.718752986  | -25.981669204 | -11.995277170 | 0 | 1 | 1 | # | st  |
| 2312 | 14 | 8 | 2.100000  | 9.399722226  | -21.518820782 | -6.670701903  | 0 | 1 | 1 | # | st  |
| 2313 | 14 | 8 | 2.100000  | 6.811372226  | -25.973370782 | -6.670701903  | 0 | 1 | 1 | # | st  |
| 2314 | 14 | 8 | 2.100000  | 6.811347014  | -22.927430796 | -6.669722830  | 0 | 1 | 1 | # | st  |
| 2315 | 14 | 8 | 2.100000  | 6.130377774  | -27.390279218 | -11.994298097 | 0 | 1 | 1 | # | st  |
| 2316 | 14 | 6 | -0.950000 | 9.914166427  | -19.680858114 | 2.588720950   | 0 | 1 | 1 | # | oht |
| 2317 | 14 | 6 | -0.950000 | 5.481638203  | -0.272172439  | -2.801727113  | 0 | 0 | 1 | # | oht |

|      |    |   |           |              |               |               |   |   |   |   |     |
|------|----|---|-----------|--------------|---------------|---------------|---|---|---|---|-----|
| 2318 | 14 | 3 | 0.425000  | 5.133272253  | -1.308055357  | -2.995860493  | 0 | 0 | 1 | # | do  |
| 2319 | 14 | 3 | 0.425000  | 10.176688619 | -1.054326608  | 3.097070537   | 0 | 0 | 1 | # | do  |
| 2320 | 14 | 3 | 0.425000  | 10.040548964 | -18.596754758 | 2.386613544   | 0 | 1 | 1 | # | do  |
| 2321 | 14 | 3 | 0.425000  | 5.289748915  | -19.012312375 | -3.363863051  | 0 | 1 | 1 | # | do  |
| 2322 | 15 | 1 | 1.575000  | 12.941955029 | 1.474661568   | -9.332229368  | 0 | 0 | 1 | # | ao  |
| 2323 | 15 | 1 | 1.575000  | 10.353605029 | 5.929211568   | -9.332229368  | 0 | 0 | 1 | # | ao  |
| 2324 | 15 | 1 | 1.575000  | 12.941544971 | 7.434438432   | -9.332770632  | 0 | 0 | 1 | # | ao  |
| 2325 | 15 | 1 | 1.575000  | 15.529894971 | 2.979888432   | -9.332770632  | 0 | 0 | 1 | # | ao  |
| 2326 | 15 | 2 | 0.425000  | 14.088050872 | 4.457267322   | -7.846384937  | 0 | 0 | 1 | # | ho  |
| 2327 | 15 | 3 | 0.425000  | 11.499700872 | 0.002717322   | -7.846384937  | 0 | 0 | 1 | # | do  |
| 2328 | 15 | 2 | 0.425000  | 11.795449128 | 4.451832678   | -10.818615063 | 0 | 0 | 1 | # | ho  |
| 2329 | 15 | 2 | 0.425000  | 14.383799128 | 8.906382678   | -10.818615063 | 0 | 0 | 1 | # | ho  |
| 2330 | 15 | 4 | -1.050000 | 11.334714655 | 1.677501481   | -10.365922068 | 0 | 0 | 1 | # | ob  |
| 2331 | 15 | 4 | -1.050000 | 15.376917264 | 6.305096126   | -12.564346262 | 0 | 0 | 1 | # | ob  |
| 2332 | 15 | 4 | -1.050000 | 13.923644487 | 2.773649320   | -10.366131378 | 0 | 0 | 1 | # | ob  |
| 2333 | 15 | 4 | -1.050000 | 12.788239092 | 7.048710300   | -12.565579711 | 0 | 0 | 1 | # | ob  |
| 2334 | 15 | 4 | -1.050000 | 11.335294487 | 7.228199320   | -10.366131378 | 0 | 0 | 1 | # | ob  |
| 2335 | 15 | 4 | -1.050000 | 11.959855513 | 6.135450680   | -8.298868622  | 0 | 0 | 1 | # | ob  |
| 2336 | 15 | 4 | -1.050000 | 15.376589092 | 2.594160300   | -12.565579711 | 0 | 0 | 1 | # | ob  |
| 2337 | 15 | 4 | -1.050000 | 11.960435345 | 2.777048519   | -8.299077932  | 0 | 0 | 1 | # | ob  |
| 2338 | 15 | 4 | -1.050000 | 13.094932736 | 7.058553874   | -6.100653738  | 0 | 0 | 1 | # | ob  |
| 2339 | 15 | 4 | -1.050000 | 14.548785345 | 7.231598519   | -8.299077932  | 0 | 0 | 1 | # | ob  |
| 2340 | 15 | 4 | -1.050000 | 10.506582736 | 2.604003874   | -6.100653738  | 0 | 0 | 1 | # | ob  |
| 2341 | 15 | 4 | -1.050000 | 13.095260908 | 1.860389700   | -6.099420289  | 0 | 0 | 1 | # | ob  |
| 2342 | 15 | 5 | -0.950000 | 12.352657657 | 0.000940996   | -8.319917115  | 0 | 0 | 1 | # | oht |
| 2343 | 15 | 6 | -0.950000 | 15.020481651 | 0.003976970   | -6.271017583  | 0 | 0 | 1 | # | oht |
| 2344 | 15 | 7 | -0.950000 | 14.941007657 | 4.455490996   | -8.319917115  | 0 | 0 | 1 | # | oh  |
| 2345 | 15 | 4 | -1.050000 | 12.432131651 | 4.458526970   | -6.271017583  | 0 | 0 | 1 | # | ob  |
| 2346 | 15 | 7 | -0.950000 | 13.530842343 | 8.908159004   | -10.345082885 | 0 | 0 | 1 | # | oh  |
| 2347 | 15 | 4 | -1.050000 | 10.863018349 | 8.905123030   | -12.393982417 | 0 | 0 | 1 | # | ob  |
| 2348 | 15 | 7 | -0.950000 | 10.942492343 | 4.453609004   | -10.345082885 | 0 | 0 | 1 | # | oh  |
| 2349 | 15 | 4 | -1.050000 | 13.451368349 | 4.450573030   | -12.393982417 | 0 | 0 | 1 | # | ob  |
| 2350 | 15 | 4 | -1.050000 | 14.548205513 | 1.680900680   | -8.298868622  | 0 | 0 | 1 | # | ob  |
| 2351 | 15 | 4 | -1.050000 | 10.506910908 | 6.314939700   | -6.099420289  | 0 | 0 | 1 | # | ob  |
| 2352 | 15 | 4 | -1.050000 | 13.923064655 | 6.132051481   | -10.365922068 | 0 | 0 | 1 | # | ob  |
| 2353 | 15 | 4 | -1.050000 | 12.788567264 | 1.850546126   | -12.564346262 | 0 | 0 | 1 | # | ob  |
| 2354 | 15 | 8 | 2.100000  | 14.576397014 | 1.527119204   | -6.669722830  | 0 | 0 | 1 | # | st  |
| 2355 | 15 | 8 | 2.100000  | 13.895427774 | 5.973370782   | -11.994298097 | 0 | 0 | 1 | # | st  |
| 2356 | 15 | 8 | 2.100000  | 11.307102986 | 7.381980796   | -11.995277170 | 0 | 0 | 1 | # | st  |
| 2357 | 15 | 8 | 2.100000  | 13.895452986 | 2.927430796   | -11.995277170 | 0 | 0 | 1 | # | st  |
| 2358 | 15 | 8 | 2.100000  | 14.576422226 | 7.390279218   | -6.670701903  | 0 | 0 | 1 | # | st  |
| 2359 | 15 | 8 | 2.100000  | 11.988072226 | 2.935729218   | -6.670701903  | 0 | 0 | 1 | # | st  |
| 2360 | 15 | 8 | 2.100000  | 11.988047014 | 5.981669204   | -6.669722830  | 0 | 0 | 1 | # | st  |
| 2361 | 15 | 8 | 2.100000  | 11.307077774 | 1.518820782   | -11.994298097 | 0 | 0 | 1 | # | st  |
| 2362 | 15 | 1 | 1.575000  | 12.941955029 | 10.383761568  | -9.332229368  | 0 | 0 | 1 | # | ao  |
| 2363 | 15 | 1 | 1.575000  | 10.353605029 | 14.838311568  | -9.332229368  | 0 | 0 | 1 | # | ao  |
| 2364 | 15 | 1 | 1.575000  | 12.941544971 | 16.343538432  | -9.332770632  | 0 | 0 | 1 | # | ao  |
| 2365 | 15 | 1 | 1.575000  | 15.529894971 | 11.888988432  | -9.332770632  | 0 | 0 | 1 | # | ao  |
| 2366 | 15 | 2 | 0.425000  | 14.088050872 | 13.366367322  | -7.846384937  | 0 | 0 | 1 | # | ho  |
| 2367 | 15 | 2 | 0.425000  | 11.499700872 | 8.911817322   | -7.846384937  | 0 | 0 | 1 | # | ho  |
| 2368 | 15 | 2 | 0.425000  | 11.795449128 | 13.360932678  | -10.818615063 | 0 | 0 | 1 | # | ho  |
| 2369 | 15 | 2 | 0.425000  | 14.383799128 | 17.815482678  | -10.818615063 | 0 | 0 | 1 | # | ho  |
| 2370 | 15 | 4 | -1.050000 | 11.334714655 | 10.586601481  | -10.365922068 | 0 | 0 | 1 | # | ob  |
| 2371 | 15 | 4 | -1.050000 | 15.376917264 | 15.214196126  | -12.564346262 | 0 | 0 | 1 | # | ob  |
| 2372 | 15 | 4 | -1.050000 | 13.923644487 | 11.682749320  | -10.366131378 | 0 | 0 | 1 | # | ob  |
| 2373 | 15 | 4 | -1.050000 | 12.788239092 | 15.957810300  | -12.565579711 | 0 | 0 | 1 | # | ob  |
| 2374 | 15 | 4 | -1.050000 | 11.335294487 | 16.137299320  | -10.366131378 | 0 | 0 | 1 | # | ob  |
| 2375 | 15 | 4 | -1.050000 | 11.959855513 | 15.044550680  | -8.298868622  | 0 | 0 | 1 | # | ob  |
| 2376 | 15 | 4 | -1.050000 | 15.376589092 | 11.503260300  | -12.565579711 | 0 | 0 | 1 | # | ob  |
| 2377 | 15 | 4 | -1.050000 | 11.960435345 | 11.686148519  | -8.299077932  | 0 | 0 | 1 | # | ob  |
| 2378 | 15 | 4 | -1.050000 | 13.094932736 | 15.967653874  | -6.100653738  | 0 | 0 | 1 | # | ob  |
| 2379 | 15 | 4 | -1.050000 | 14.548785345 | 16.140698519  | -8.299077932  | 0 | 0 | 1 | # | ob  |
| 2380 | 15 | 4 | -1.050000 | 10.506582736 | 11.513103874  | -6.100653738  | 0 | 0 | 1 | # | ob  |
| 2381 | 15 | 4 | -1.050000 | 13.095260908 | 10.769489700  | -6.099420289  | 0 | 0 | 1 | # | ob  |
| 2382 | 15 | 7 | -0.950000 | 12.352657657 | 8.910040996   | -8.319917115  | 0 | 0 | 1 | # | oh  |
| 2383 | 15 | 4 | -1.050000 | 15.020481651 | 8.913076970   | -6.271017583  | 0 | 0 | 1 | # | ob  |
| 2384 | 15 | 7 | -0.950000 | 14.941007657 | 13.364590996  | -8.319917115  | 0 | 0 | 1 | # | oh  |
| 2385 | 15 | 4 | -1.050000 | 12.432131651 | 13.367626970  | -6.271017583  | 0 | 0 | 1 | # | ob  |
| 2386 | 15 | 7 | -0.950000 | 13.530842343 | 17.817259004  | -10.345082885 | 0 | 0 | 1 | # | oh  |
| 2387 | 15 | 4 | -1.050000 | 10.863018349 | 17.814223030  | -12.393982417 | 0 | 0 | 1 | # | ob  |
| 2388 | 15 | 7 | -0.950000 | 10.942492343 | 13.362709004  | -10.345082885 | 0 | 0 | 1 | # | oh  |
| 2389 | 15 | 4 | -1.050000 | 13.451368349 | 13.359673030  | -12.393982417 | 0 | 0 | 1 | # | ob  |
| 2390 | 15 | 4 | -1.050000 | 14.548205513 | 10.590000680  | -8.298868622  | 0 | 0 | 1 | # | ob  |
| 2391 | 15 | 4 | -1.050000 | 10.506910908 | 15.224039700  | -6.099420289  | 0 | 0 | 1 | # | ob  |
| 2392 | 15 | 4 | -1.050000 | 13.923064655 | 15.041151481  | -10.365922068 | 0 | 0 | 1 | # | ob  |
| 2393 | 15 | 4 | -1.050000 | 12.788567264 | 10.759646126  | -12.564346262 | 0 | 0 | 1 | # | ob  |
| 2394 | 15 | 8 | 2.100000  | 14.576397014 | 10.436219204  | -6.669722830  | 0 | 0 | 1 | # | st  |
| 2395 | 15 | 8 | 2.100000  | 13.895427774 | 14.882470782  | -11.994298097 | 0 | 0 | 1 | # | st  |
| 2396 | 15 | 8 | 2.100000  | 11.307102986 | 16.291080796  | -11.995277170 | 0 | 0 | 1 | # | st  |
| 2397 | 15 | 8 | 2.100000  | 13.895452986 | 11.836530796  | -11.995277170 | 0 | 0 | 1 | # | st  |
| 2398 | 15 | 8 | 2.100000  | 14.576422226 | 16.299379218  | -6.670701903  | 0 | 0 | 1 | # | st  |
| 2399 | 15 | 8 | 2.100000  | 11.988072226 | 11.844829218  | -6.670701903  | 0 | 0 | 1 | # | st  |
| 2400 | 15 | 8 | 2.100000  | 11.988047014 | 14.890769204  | -6.669722830  | 0 | 0 | 1 | # | st  |
| 2401 | 15 | 8 | 2.100000  | 11.307077774 | 10.427920782  | -11.994298097 | 0 | 0 | 1 | # | st  |
| 2402 | 15 | 1 | 1.575000  | 12.941955029 | 19.292861568  | -9.332229368  | 0 | 0 | 1 | # | ao  |
| 2403 | 15 | 1 | 1.575000  | 10.353605029 | 23.747411568  | -9.332229368  | 0 | 0 | 1 | # | ao  |
| 2404 | 15 | 1 | 1.575000  | 12.941544971 | 25.252638432  | -9.332770632  | 0 | 0 | 1 | # | ao  |
| 2405 | 15 | 1 | 1.575000  | 15.529894971 | 20.798088432  | -9.332770632  | 0 | 0 | 1 | # | ao  |
| 2406 | 15 | 2 | 0.425000  | 14.088050872 | 22.275467322  | -7.846384937  | 0 | 0 | 1 | # | ho  |
| 2407 | 15 | 2 | 0.425000  | 11.499700872 | 17.820917322  | -7.846384937  | 0 | 0 | 1 | # | ho  |
| 2408 | 15 | 2 | 0.425000  | 11.795449128 | 22.270032678  | -10.818615063 | 0 | 0 | 1 | # | ho  |
| 2409 | 15 | 2 | 0.425000  | 14.383799128 | 26.724582678  | -10.818615063 | 0 | 0 | 1 | # | ho  |
| 2410 | 15 | 4 | -1.050000 | 11.334714655 | 19.495701481  | -10.365922068 | 0 | 0 | 1 | # | ob  |

|      |    |   |           |               |               |               |   |   |   |   |     |
|------|----|---|-----------|---------------|---------------|---------------|---|---|---|---|-----|
| 2411 | 15 | 4 | -1.050000 | 15.376917264  | 24.123296126  | -12.564346262 | 0 | 0 | 1 | # | ob  |
| 2412 | 15 | 4 | -1.050000 | 13.923644487  | 20.591849320  | -10.366131378 | 0 | 0 | 1 | # | ob  |
| 2413 | 15 | 4 | -1.050000 | 12.788239092  | 24.866910300  | -12.565579711 | 0 | 0 | 1 | # | ob  |
| 2414 | 15 | 4 | -1.050000 | 11.335294487  | 25.046399320  | -10.366131378 | 0 | 0 | 1 | # | ob  |
| 2415 | 15 | 4 | -1.050000 | 11.959855513  | 23.953650680  | -8.298868622  | 0 | 0 | 1 | # | ob  |
| 2416 | 15 | 4 | -1.050000 | 15.376589092  | 20.412360300  | -12.565579711 | 0 | 0 | 1 | # | ob  |
| 2417 | 15 | 4 | -1.050000 | 11.960435345  | 20.595248519  | -8.299077932  | 0 | 0 | 1 | # | ob  |
| 2418 | 15 | 4 | -1.050000 | 13.094932736  | 24.876753874  | -6.100653738  | 0 | 0 | 1 | # | ob  |
| 2419 | 15 | 4 | -1.050000 | 14.548785345  | 25.049798519  | -8.299077932  | 0 | 0 | 1 | # | ob  |
| 2420 | 15 | 4 | -1.050000 | 10.506582736  | 20.422203874  | -6.100653738  | 0 | 0 | 1 | # | ob  |
| 2421 | 15 | 4 | -1.050000 | 13.095260908  | 19.678589700  | -6.099420289  | 0 | 0 | 1 | # | ob  |
| 2422 | 15 | 7 | -0.950000 | 12.352657657  | 17.819140996  | -8.319917115  | 0 | 0 | 1 | # | oh  |
| 2423 | 15 | 4 | -1.050000 | 15.020481651  | 17.822176970  | -6.271017583  | 0 | 0 | 1 | # | ob  |
| 2424 | 15 | 7 | -0.950000 | 14.941007657  | 22.273690996  | -8.319917115  | 0 | 0 | 1 | # | oh  |
| 2425 | 15 | 4 | -1.050000 | 12.432131651  | 22.276726970  | -6.271017583  | 0 | 0 | 1 | # | ob  |
| 2426 | 15 | 7 | -0.950000 | 13.530842343  | 26.726359004  | -10.345082885 | 0 | 0 | 1 | # | oh  |
| 2427 | 15 | 4 | -1.050000 | 10.863018349  | 26.723323030  | -12.393982417 | 0 | 0 | 1 | # | ob  |
| 2428 | 15 | 7 | -0.950000 | 10.942492343  | 22.271809004  | -10.345082885 | 0 | 0 | 1 | # | oh  |
| 2429 | 15 | 4 | -1.050000 | 13.451368349  | 22.268773030  | -12.393982417 | 0 | 0 | 1 | # | ob  |
| 2430 | 15 | 4 | -1.050000 | 14.548205513  | 19.499100680  | -8.298868622  | 0 | 0 | 1 | # | ob  |
| 2431 | 15 | 4 | -1.050000 | 10.506910908  | 24.133139700  | -6.099420289  | 0 | 0 | 1 | # | ob  |
| 2432 | 15 | 4 | -1.050000 | 13.923064655  | 23.950251481  | -10.365922068 | 0 | 0 | 1 | # | ob  |
| 2433 | 15 | 4 | -1.050000 | 12.788567264  | 19.668746126  | -12.564346262 | 0 | 0 | 1 | # | ob  |
| 2434 | 15 | 8 | 2.100000  | 14.576397014  | 19.345319204  | -6.669722830  | 0 | 0 | 1 | # | st  |
| 2435 | 15 | 8 | 2.100000  | 13.895427774  | 23.791570782  | -11.994298097 | 0 | 0 | 1 | # | st  |
| 2436 | 15 | 8 | 2.100000  | 11.307102986  | 25.200180796  | -11.995277170 | 0 | 0 | 1 | # | st  |
| 2437 | 15 | 8 | 2.100000  | 13.895452986  | 20.745630796  | -11.995277170 | 0 | 0 | 1 | # | st  |
| 2438 | 15 | 8 | 2.100000  | 14.576422226  | 25.208479218  | -6.670701903  | 0 | 0 | 1 | # | st  |
| 2439 | 15 | 8 | 2.100000  | 11.988072226  | 20.753929218  | -6.670701903  | 0 | 0 | 1 | # | st  |
| 2440 | 15 | 8 | 2.100000  | 11.988047014  | 23.799869204  | -6.669722830  | 0 | 0 | 1 | # | st  |
| 2441 | 15 | 8 | 2.100000  | 11.307077774  | 19.337020782  | -11.994298097 | 0 | 0 | 1 | # | st  |
| 2442 | 15 | 1 | 1.575000  | 12.941955029  | -27.434438432 | -9.332229368  | 0 | 1 | 1 | # | ao  |
| 2443 | 15 | 1 | 1.575000  | 10.353605029  | -22.979888432 | -9.332229368  | 0 | 1 | 1 | # | ao  |
| 2444 | 15 | 1 | 1.575000  | 12.941544971  | -21.474661568 | -9.332770632  | 0 | 1 | 1 | # | ao  |
| 2445 | 15 | 1 | 1.575000  | 15.529894971  | -25.929211568 | -9.332770632  | 0 | 1 | 1 | # | ao  |
| 2446 | 15 | 2 | 0.425000  | 14.088050872  | -24.451832678 | -7.846384937  | 0 | 1 | 1 | # | ho  |
| 2447 | 15 | 2 | 0.425000  | 11.499700872  | 26.730017322  | -7.846384937  | 0 | 0 | 1 | # | ho  |
| 2448 | 15 | 2 | 0.425000  | 11.795449128  | -24.457267322 | -10.818615063 | 0 | 1 | 1 | # | ho  |
| 2449 | 15 | 3 | 0.425000  | 14.383799128  | -20.002717322 | -10.818615063 | 0 | 1 | 1 | # | do  |
| 2450 | 15 | 4 | -1.050000 | 11.334714655  | -27.231598519 | -10.365922068 | 0 | 1 | 1 | # | ob  |
| 2451 | 15 | 4 | -1.050000 | 15.376917264  | -22.604003874 | -12.564346262 | 0 | 1 | 1 | # | ob  |
| 2452 | 15 | 4 | -1.050000 | 13.923644487  | -26.135450680 | -10.366131378 | 0 | 1 | 1 | # | ob  |
| 2453 | 15 | 4 | -1.050000 | 12.788239092  | -21.860389700 | -12.565579711 | 0 | 1 | 1 | # | ob  |
| 2454 | 15 | 4 | -1.050000 | 11.335294487  | -21.680900680 | -10.366131378 | 0 | 1 | 1 | # | ob  |
| 2455 | 15 | 4 | -1.050000 | 11.959855513  | -22.773649320 | -8.298868622  | 0 | 1 | 1 | # | ob  |
| 2456 | 15 | 4 | -1.050000 | 15.376589092  | -26.314939700 | -12.565579711 | 0 | 1 | 1 | # | ob  |
| 2457 | 15 | 4 | -1.050000 | 11.960435345  | -26.132051481 | -8.299077932  | 0 | 1 | 1 | # | ob  |
| 2458 | 15 | 4 | -1.050000 | 13.094932736  | -21.850546126 | -6.100653738  | 0 | 1 | 1 | # | ob  |
| 2459 | 15 | 4 | -1.050000 | 14.548785345  | -21.677501481 | -8.299077932  | 0 | 1 | 1 | # | ob  |
| 2460 | 15 | 4 | -1.050000 | 10.506582736  | -26.305096126 | -6.100653738  | 0 | 1 | 1 | # | ob  |
| 2461 | 15 | 4 | -1.050000 | 13.095260908  | -27.048710300 | -6.099420289  | 0 | 1 | 1 | # | ob  |
| 2462 | 15 | 7 | -0.950000 | 12.352657657  | 26.728240996  | -8.319917115  | 0 | 0 | 1 | # | oh  |
| 2463 | 15 | 4 | -1.050000 | 15.020481651  | 26.731276970  | -6.271017583  | 0 | 0 | 1 | # | ob  |
| 2464 | 15 | 7 | -0.950000 | 14.941007657  | -24.453609004 | -8.319917115  | 0 | 1 | 1 | # | oh  |
| 2465 | 15 | 4 | -1.050000 | 12.432131651  | -24.450573030 | -6.271017583  | 0 | 1 | 1 | # | ob  |
| 2466 | 15 | 5 | -0.950000 | 13.530842343  | -20.000940996 | -10.345082885 | 0 | 1 | 1 | # | oh  |
| 2467 | 15 | 6 | -0.950000 | 10.863018349  | -20.003976970 | -12.393982417 | 0 | 1 | 1 | # | oht |
| 2468 | 15 | 7 | -0.950000 | 10.942492343  | -24.455490996 | -10.345082885 | 0 | 1 | 1 | # | oh  |
| 2469 | 15 | 4 | -1.050000 | 13.451368349  | -24.458526970 | -12.393982417 | 0 | 1 | 1 | # | ob  |
| 2470 | 15 | 4 | -1.050000 | 14.548205513  | -27.228199320 | -8.298868622  | 0 | 1 | 1 | # | ob  |
| 2471 | 15 | 4 | -1.050000 | 10.506910908  | -22.594160300 | -6.099420289  | 0 | 1 | 1 | # | ob  |
| 2472 | 15 | 4 | -1.050000 | 13.923064655  | -22.777048519 | -10.365922068 | 0 | 1 | 1 | # | ob  |
| 2473 | 15 | 4 | -1.050000 | 12.788567264  | -27.058553874 | -12.564346262 | 0 | 1 | 1 | # | ob  |
| 2474 | 15 | 8 | 2.100000  | 14.576397014  | -27.381980796 | -6.669722830  | 0 | 1 | 1 | # | st  |
| 2475 | 15 | 8 | 2.100000  | 13.895427774  | -22.935729218 | -11.994298097 | 0 | 1 | 1 | # | st  |
| 2476 | 15 | 8 | 2.100000  | 11.307102986  | -21.527119204 | -11.995277170 | 0 | 1 | 1 | # | st  |
| 2477 | 15 | 8 | 2.100000  | 13.895452986  | -25.981669204 | -11.995277170 | 0 | 1 | 1 | # | st  |
| 2478 | 15 | 8 | 2.100000  | 14.576422226  | -21.518820782 | -6.670701903  | 0 | 1 | 1 | # | st  |
| 2479 | 15 | 8 | 2.100000  | 11.988072226  | -25.973370782 | -6.670701903  | 0 | 1 | 1 | # | st  |
| 2480 | 15 | 8 | 2.100000  | 11.988047014  | -22.927430796 | -6.669722830  | 0 | 1 | 1 | # | st  |
| 2481 | 15 | 8 | 2.100000  | 11.307077774  | -27.390279218 | -11.994298097 | 0 | 1 | 1 | # | st  |
| 2482 | 15 | 6 | -0.950000 | 15.090866427  | -19.680858114 | 2.588720950   | 0 | 1 | 1 | # | oht |
| 2483 | 15 | 6 | -0.950000 | 10.658338203  | -0.272172439  | -2.801727113  | 0 | 0 | 1 | # | oht |
| 2484 | 15 | 3 | 0.425000  | 10.309972253  | -1.308055357  | -2.995860493  | 0 | 0 | 1 | # | do  |
| 2485 | 15 | 3 | 0.425000  | 15.353388619  | -1.054326608  | 3.097070537   | 0 | 0 | 1 | # | do  |
| 2486 | 15 | 3 | 0.425000  | 15.217248964  | -18.596754758 | 2.386613544   | 0 | 1 | 1 | # | do  |
| 2487 | 15 | 3 | 0.425000  | 10.466448915  | -19.012312375 | -3.363863051  | 0 | 1 | 1 | # | do  |
| 2488 | 16 | 1 | 1.575000  | -12.941544971 | 1.474661568   | -9.332229368  | 1 | 0 | 1 | # | ao  |
| 2489 | 16 | 1 | 1.575000  | -15.529894971 | 5.929211568   | -9.332229368  | 1 | 0 | 1 | # | ao  |
| 2490 | 16 | 1 | 1.575000  | -12.941955029 | 7.434438432   | -9.332770632  | 1 | 0 | 1 | # | ao  |
| 2491 | 16 | 1 | 1.575000  | -10.353605029 | 2.979888432   | -9.332770632  | 1 | 0 | 1 | # | ao  |
| 2492 | 16 | 2 | 0.425000  | -11.795449128 | 4.457267322   | -7.846384937  | 1 | 0 | 1 | # | ho  |
| 2493 | 16 | 3 | 0.425000  | -14.383799128 | 0.002717322   | -7.846384937  | 1 | 0 | 1 | # | do  |
| 2494 | 16 | 2 | 0.425000  | -14.088050872 | 4.451832678   | -10.818615063 | 1 | 0 | 1 | # | ho  |
| 2495 | 16 | 2 | 0.425000  | -11.499700872 | 8.906382678   | -10.818615063 | 1 | 0 | 1 | # | ho  |
| 2496 | 16 | 4 | -1.050000 | -14.548785345 | 1.677501481   | -10.365922068 | 1 | 0 | 1 | # | ob  |
| 2497 | 16 | 4 | -1.050000 | -10.506582736 | 6.305096126   | -12.564346262 | 1 | 0 | 1 | # | ob  |
| 2498 | 16 | 4 | -1.050000 | -11.959855513 | 2.773649320   | -10.366131378 | 1 | 0 | 1 | # | ob  |
| 2499 | 16 | 4 | -1.050000 | -13.095260908 | 7.048710300   | -12.565579711 | 1 | 0 | 1 | # | ob  |
| 2500 | 16 | 4 | -1.050000 | -14.548205513 | 7.228199320   | -10.366131378 | 1 | 0 | 1 | # | ob  |
| 2501 | 16 | 4 | -1.050000 | -13.923644487 | 6.135450680   | -8.298868622  | 1 | 0 | 1 | # | ob  |
| 2502 | 16 | 4 | -1.050000 | -10.506910908 | 2.594160300   | -12.565579711 | 1 | 0 | 1 | # | ob  |
| 2503 | 16 | 4 | -1.050000 | -13.923064655 | 2.777048519   | -8.299077932  | 1 | 0 | 1 | # | ob  |

|      |    |   |           |               |              |               |   |   |   |   |     |
|------|----|---|-----------|---------------|--------------|---------------|---|---|---|---|-----|
| 2504 | 16 | 4 | -1.050000 | -12.788567264 | 7.058553874  | -6.100653738  | 1 | 0 | 1 | # | ob  |
| 2505 | 16 | 4 | -1.050000 | -11.334714655 | 7.231598519  | -8.299077932  | 1 | 0 | 1 | # | ob  |
| 2506 | 16 | 4 | -1.050000 | -15.376917264 | 2.604003874  | -6.100653738  | 1 | 0 | 1 | # | ob  |
| 2507 | 16 | 4 | -1.050000 | -12.788239092 | 1.860389700  | -6.099420289  | 1 | 0 | 1 | # | ob  |
| 2508 | 16 | 5 | -0.950000 | -13.530842343 | 0.000940996  | -8.319917115  | 1 | 0 | 1 | # | oho |
| 2509 | 16 | 6 | -0.950000 | -10.863018349 | 0.003976970  | -6.271017583  | 1 | 0 | 1 | # | oht |
| 2510 | 16 | 7 | -0.950000 | -10.942492343 | 4.455490996  | -8.319917115  | 1 | 0 | 1 | # | oh  |
| 2511 | 16 | 4 | -1.050000 | -13.451368349 | 4.458526970  | -6.271017583  | 1 | 0 | 1 | # | ob  |
| 2512 | 16 | 7 | -0.950000 | -12.352657657 | 8.908159004  | -10.345082885 | 1 | 0 | 1 | # | oh  |
| 2513 | 16 | 4 | -1.050000 | -15.020481651 | 8.905123030  | -12.393982417 | 1 | 0 | 1 | # | ob  |
| 2514 | 16 | 7 | -0.950000 | -14.941007657 | 4.453609004  | -10.345082885 | 1 | 0 | 1 | # | oh  |
| 2515 | 16 | 4 | -1.050000 | -12.432131651 | 4.450573030  | -12.393982417 | 1 | 0 | 1 | # | ob  |
| 2516 | 16 | 4 | -1.050000 | -11.335294487 | 1.680900680  | -8.298868622  | 1 | 0 | 1 | # | ob  |
| 2517 | 16 | 4 | -1.050000 | -15.376589092 | 6.314939700  | -6.099420289  | 1 | 0 | 1 | # | ob  |
| 2518 | 16 | 4 | -1.050000 | -11.960435345 | 6.132051481  | -10.365922068 | 1 | 0 | 1 | # | ob  |
| 2519 | 16 | 4 | -1.050000 | -13.094932736 | 1.850546126  | -12.564346262 | 1 | 0 | 1 | # | ob  |
| 2520 | 16 | 8 | 2.100000  | -11.307102986 | 1.527119204  | -6.669722830  | 1 | 0 | 1 | # | st  |
| 2521 | 16 | 8 | 2.100000  | -11.988072226 | 5.973370782  | -11.994298097 | 1 | 0 | 1 | # | st  |
| 2522 | 16 | 8 | 2.100000  | -14.576397014 | 7.381980796  | -11.995277170 | 1 | 0 | 1 | # | st  |
| 2523 | 16 | 8 | 2.100000  | -11.988047014 | 2.927430796  | -11.995277170 | 1 | 0 | 1 | # | st  |
| 2524 | 16 | 8 | 2.100000  | -11.307077774 | 7.390279218  | -6.670701903  | 1 | 0 | 1 | # | st  |
| 2525 | 16 | 8 | 2.100000  | -13.895427774 | 2.935729218  | -6.670701903  | 1 | 0 | 1 | # | st  |
| 2526 | 16 | 8 | 2.100000  | -13.895452986 | 5.981669204  | -6.669722830  | 1 | 0 | 1 | # | st  |
| 2527 | 16 | 8 | 2.100000  | -14.576422226 | 1.518820782  | -11.994298097 | 1 | 0 | 1 | # | st  |
| 2528 | 16 | 1 | 1.575000  | -12.941544971 | 10.383761568 | -9.332229368  | 1 | 0 | 1 | # | ao  |
| 2529 | 16 | 1 | 1.575000  | -15.529894971 | 14.838311568 | -9.332229368  | 1 | 0 | 1 | # | ao  |
| 2530 | 16 | 1 | 1.575000  | -12.941955029 | 16.343538432 | -9.332770632  | 1 | 0 | 1 | # | ao  |
| 2531 | 16 | 1 | 1.575000  | -10.353605029 | 11.888988432 | -9.332770632  | 1 | 0 | 1 | # | ao  |
| 2532 | 16 | 2 | 0.425000  | -11.795449128 | 13.366367322 | -7.846384937  | 1 | 0 | 1 | # | ho  |
| 2533 | 16 | 2 | 0.425000  | -14.383799128 | 8.911817322  | -7.846384937  | 1 | 0 | 1 | # | ho  |
| 2534 | 16 | 2 | 0.425000  | -14.088050872 | 13.360932678 | -10.818615063 | 1 | 0 | 1 | # | ho  |
| 2535 | 16 | 2 | 0.425000  | -11.499700872 | 17.815482678 | -10.818615063 | 1 | 0 | 1 | # | ho  |
| 2536 | 16 | 4 | -1.050000 | -14.548785345 | 10.586601481 | -10.365922068 | 1 | 0 | 1 | # | ob  |
| 2537 | 16 | 4 | -1.050000 | -10.506582736 | 15.214196126 | -12.564346262 | 1 | 0 | 1 | # | ob  |
| 2538 | 16 | 4 | -1.050000 | -11.959855513 | 11.682749320 | -10.366131378 | 1 | 0 | 1 | # | ob  |
| 2539 | 16 | 4 | -1.050000 | -13.095260908 | 15.957810300 | -12.565579711 | 1 | 0 | 1 | # | ob  |
| 2540 | 16 | 4 | -1.050000 | -14.548205513 | 16.137299320 | -10.366131378 | 1 | 0 | 1 | # | ob  |
| 2541 | 16 | 4 | -1.050000 | -13.923644487 | 15.044550680 | -8.298868622  | 1 | 0 | 1 | # | ob  |
| 2542 | 16 | 4 | -1.050000 | -10.506910908 | 11.503260300 | -12.565579711 | 1 | 0 | 1 | # | ob  |
| 2543 | 16 | 4 | -1.050000 | -13.923064655 | 11.686148519 | -8.299077932  | 1 | 0 | 1 | # | ob  |
| 2544 | 16 | 4 | -1.050000 | -12.788567264 | 15.967653874 | -6.100653738  | 1 | 0 | 1 | # | ob  |
| 2545 | 16 | 4 | -1.050000 | -11.334714655 | 16.140698519 | -8.299077932  | 1 | 0 | 1 | # | ob  |
| 2546 | 16 | 4 | -1.050000 | -15.376917264 | 11.513103874 | -6.100653738  | 1 | 0 | 1 | # | ob  |
| 2547 | 16 | 4 | -1.050000 | -12.788239092 | 10.769489700 | -6.099420289  | 1 | 0 | 1 | # | ob  |
| 2548 | 16 | 7 | -0.950000 | -13.530842343 | 8.910040996  | -8.319917115  | 1 | 0 | 1 | # | oh  |
| 2549 | 16 | 4 | -1.050000 | -10.863018349 | 8.913076970  | -6.271017583  | 1 | 0 | 1 | # | ob  |
| 2550 | 16 | 7 | -0.950000 | -10.942492343 | 13.364590996 | -8.319917115  | 1 | 0 | 1 | # | oh  |
| 2551 | 16 | 4 | -1.050000 | -13.451368349 | 13.367626970 | -6.271017583  | 1 | 0 | 1 | # | ob  |
| 2552 | 16 | 7 | -0.950000 | -12.352657657 | 17.817259004 | -10.345082885 | 1 | 0 | 1 | # | oh  |
| 2553 | 16 | 4 | -1.050000 | -15.020481651 | 17.814223030 | -12.393982417 | 1 | 0 | 1 | # | ob  |
| 2554 | 16 | 7 | -0.950000 | -14.941007657 | 13.362709004 | -10.345082885 | 1 | 0 | 1 | # | oh  |
| 2555 | 16 | 4 | -1.050000 | -12.432131651 | 13.359673030 | -12.393982417 | 1 | 0 | 1 | # | ob  |
| 2556 | 16 | 4 | -1.050000 | -11.335294487 | 10.590000680 | -8.298868622  | 1 | 0 | 1 | # | ob  |
| 2557 | 16 | 4 | -1.050000 | -15.376589092 | 15.224039700 | -6.099420289  | 1 | 0 | 1 | # | ob  |
| 2558 | 16 | 4 | -1.050000 | -11.960435345 | 15.041151481 | -10.365922068 | 1 | 0 | 1 | # | ob  |
| 2559 | 16 | 4 | -1.050000 | -13.094932736 | 10.759646126 | -12.564346262 | 1 | 0 | 1 | # | ob  |
| 2560 | 16 | 8 | 2.100000  | -11.307102986 | 10.436219204 | -6.669722830  | 1 | 0 | 1 | # | st  |
| 2561 | 16 | 8 | 2.100000  | -11.988072226 | 14.882470782 | -11.994298097 | 1 | 0 | 1 | # | st  |
| 2562 | 16 | 8 | 2.100000  | -14.576397014 | 16.291080796 | -11.995277170 | 1 | 0 | 1 | # | st  |
| 2563 | 16 | 8 | 2.100000  | -11.988047014 | 11.836530796 | -11.995277170 | 1 | 0 | 1 | # | st  |
| 2564 | 16 | 8 | 2.100000  | -11.307077774 | 16.299379218 | -6.670701903  | 1 | 0 | 1 | # | st  |
| 2565 | 16 | 8 | 2.100000  | -13.895427774 | 11.844829218 | -6.670701903  | 1 | 0 | 1 | # | st  |
| 2566 | 16 | 8 | 2.100000  | -13.895452986 | 14.890769204 | -6.669722830  | 1 | 0 | 1 | # | st  |
| 2567 | 16 | 8 | 2.100000  | -14.576422226 | 10.427920782 | -11.994298097 | 1 | 0 | 1 | # | st  |
| 2568 | 16 | 1 | 1.575000  | -12.941544971 | 19.292861568 | -9.332229368  | 1 | 0 | 1 | # | ao  |
| 2569 | 16 | 1 | 1.575000  | -15.529894971 | 23.747411568 | -9.332229368  | 1 | 0 | 1 | # | ao  |
| 2570 | 16 | 1 | 1.575000  | -12.941955029 | 25.252638432 | -9.332770632  | 1 | 0 | 1 | # | ao  |
| 2571 | 16 | 1 | 1.575000  | -10.353605029 | 20.798088432 | -9.332770632  | 1 | 0 | 1 | # | ao  |
| 2572 | 16 | 2 | 0.425000  | -11.795449128 | 22.275467322 | -7.846384937  | 1 | 0 | 1 | # | ho  |
| 2573 | 16 | 2 | 0.425000  | -14.383799128 | 17.820917322 | -7.846384937  | 1 | 0 | 1 | # | ho  |
| 2574 | 16 | 2 | 0.425000  | -14.088050872 | 22.270032678 | -10.818615063 | 1 | 0 | 1 | # | ho  |
| 2575 | 16 | 2 | 0.425000  | -11.499700872 | 26.724582678 | -10.818615063 | 1 | 0 | 1 | # | ho  |
| 2576 | 16 | 4 | -1.050000 | -14.548785345 | 19.495701481 | -10.365922068 | 1 | 0 | 1 | # | ob  |
| 2577 | 16 | 4 | -1.050000 | -10.506582736 | 24.123296126 | -12.564346262 | 1 | 0 | 1 | # | ob  |
| 2578 | 16 | 4 | -1.050000 | -11.959855513 | 20.591849320 | -10.366131378 | 1 | 0 | 1 | # | ob  |
| 2579 | 16 | 4 | -1.050000 | -13.095260908 | 24.866910300 | -12.565579711 | 1 | 0 | 1 | # | ob  |
| 2580 | 16 | 4 | -1.050000 | -14.548205513 | 25.046399320 | -10.366131378 | 1 | 0 | 1 | # | ob  |
| 2581 | 16 | 4 | -1.050000 | -13.923644487 | 23.953650680 | -8.298868622  | 1 | 0 | 1 | # | ob  |
| 2582 | 16 | 4 | -1.050000 | -10.506910908 | 20.412360300 | -12.565579711 | 1 | 0 | 1 | # | ob  |
| 2583 | 16 | 4 | -1.050000 | -13.923064655 | 20.595248519 | -8.299077932  | 1 | 0 | 1 | # | ob  |
| 2584 | 16 | 4 | -1.050000 | -12.788567264 | 24.876753874 | -6.100653738  | 1 | 0 | 1 | # | ob  |
| 2585 | 16 | 4 | -1.050000 | -11.334714655 | 25.049798519 | -8.299077932  | 1 | 0 | 1 | # | ob  |
| 2586 | 16 | 4 | -1.050000 | -15.376917264 | 20.422203874 | -6.100653738  | 1 | 0 | 1 | # | ob  |
| 2587 | 16 | 4 | -1.050000 | -12.788239092 | 19.678589700 | -6.099420289  | 1 | 0 | 1 | # | ob  |
| 2588 | 16 | 7 | -0.950000 | -13.530842343 | 17.819140996 | -8.319917115  | 1 | 0 | 1 | # | oh  |
| 2589 | 16 | 4 | -1.050000 | -10.863018349 | 17.822176970 | -6.271017583  | 1 | 0 | 1 | # | ob  |
| 2590 | 16 | 7 | -0.950000 | -10.942492343 | 22.273690996 | -8.319917115  | 1 | 0 | 1 | # | oh  |
| 2591 | 16 | 4 | -1.050000 | -13.451368349 | 22.276726970 | -6.271017583  | 1 | 0 | 1 | # | ob  |
| 2592 | 16 | 7 | -0.950000 | -12.352657657 | 26.726359004 | -10.345082885 | 1 | 0 | 1 | # | oh  |
| 2593 | 16 | 4 | -1.050000 | -15.020481651 | 26.723323030 | -12.393982417 | 1 | 0 | 1 | # | ob  |
| 2594 | 16 | 7 | -0.950000 | -14.941007657 | 22.271809004 | -10.345082885 | 1 | 0 | 1 | # | oh  |
| 2595 | 16 | 4 | -1.050000 | -12.432131651 | 22.268773030 | -12.393982417 | 1 | 0 | 1 | # | ob  |
| 2596 | 16 | 4 | -1.050000 | -11.335294487 | 19.499100680 | -8.298868622  | 1 | 0 | 1 | # | ob  |

|      |    |   |           |               |               |               |   |   |   |   |    |
|------|----|---|-----------|---------------|---------------|---------------|---|---|---|---|----|
| 2597 | 16 | 4 | -1.050000 | -15.376589092 | 24.133139700  | -6.099420289  | 1 | 0 | 1 | # | ob |
| 2598 | 16 | 4 | -1.050000 | -11.960435345 | 23.950251481  | -10.365922068 | 1 | 0 | 1 | # | ob |
| 2599 | 16 | 4 | -1.050000 | -13.094932736 | 19.668746126  | -12.564346262 | 1 | 0 | 1 | # | ob |
| 2600 | 16 | 8 | 2.100000  | -11.307102986 | 19.345319204  | -6.669722830  | 1 | 0 | 1 | # | st |
| 2601 | 16 | 8 | 2.100000  | -11.988072226 | 23.791570782  | -11.994298097 | 1 | 0 | 1 | # | st |
| 2602 | 16 | 8 | 2.100000  | -14.576397014 | 25.200180796  | -11.995277170 | 1 | 0 | 1 | # | st |
| 2603 | 16 | 8 | 2.100000  | -11.988047014 | 20.745630796  | -11.995277170 | 1 | 0 | 1 | # | st |
| 2604 | 16 | 8 | 2.100000  | -11.307077774 | 25.208479218  | -6.670701903  | 1 | 0 | 1 | # | st |
| 2605 | 16 | 8 | 2.100000  | -13.895427774 | 20.753929218  | -6.670701903  | 1 | 0 | 1 | # | st |
| 2606 | 16 | 8 | 2.100000  | -13.895452986 | 23.799869204  | -6.669722830  | 1 | 0 | 1 | # | st |
| 2607 | 16 | 8 | 2.100000  | -14.576422226 | 19.337020782  | -11.994298097 | 1 | 0 | 1 | # | st |
| 2608 | 16 | 1 | 1.575000  | -12.941544971 | -27.434438432 | -9.332229368  | 1 | 1 | 1 | # | ao |
| 2609 | 16 | 1 | 1.575000  | -15.529894971 | -22.979888432 | -9.332229368  | 1 | 1 | 1 | # | ao |
| 2610 | 16 | 1 | 1.575000  | -12.941955029 | -21.474661568 | -9.332770632  | 1 | 1 | 1 | # | ao |
| 2611 | 16 | 1 | 1.575000  | -10.353605029 | -25.929211568 | -9.332770632  | 1 | 1 | 1 | # | ao |
| 2612 | 16 | 2 | 0.425000  | -11.795449128 | -24.451832678 | -7.846384937  | 1 | 1 | 1 | # | ho |
| 2613 | 16 | 2 | 0.425000  | -14.383799128 | 26.730017322  | -7.846384937  | 1 | 0 | 1 | # | ho |
| 2614 | 16 | 2 | 0.425000  | -14.088050872 | -24.457267322 | -10.818615063 | 1 | 1 | 1 | # | ho |
| 2615 | 16 | 3 | 0.425000  | -11.499700872 | -20.002717322 | -10.818615063 | 1 | 1 | 1 | # | do |
| 2616 | 16 | 4 | -1.050000 | -14.548785345 | -27.231598519 | -10.365922068 | 1 | 1 | 1 | # | ob |
| 2617 | 16 | 4 | -1.050000 | -10.506582736 | -22.604003874 | -12.564346262 | 1 | 1 | 1 | # | ob |
| 2618 | 16 | 4 | -1.050000 | -11.959855513 | -26.135450680 | -10.366131378 | 1 | 1 | 1 | # | ob |
| 2619 | 16 | 4 | -1.050000 | -13.095260908 | -21.860389700 | -12.565579711 | 1 | 1 | 1 | # | ob |
| 2620 | 16 | 4 | -1.050000 | -14.548205513 | -21.680900680 | -10.366131378 | 1 | 1 | 1 | # | ob |
| 2621 | 16 | 4 | -1.050000 | -13.923644487 | -22.773649320 | -8.298868622  | 1 | 1 | 1 | # | ob |
| 2622 | 16 | 4 | -1.050000 | -10.506910908 | -26.314939700 | -12.565579711 | 1 | 1 | 1 | # | ob |
| 2623 | 16 | 4 | -1.050000 | -13.923064655 | -26.132051481 | -8.299077932  | 1 | 1 | 1 | # | ob |
| 2624 | 16 | 4 | -1.050000 | -12.788567264 | -21.850546126 | -6.100653738  | 1 | 1 | 1 | # | ob |
| 2625 | 16 | 4 | -1.050000 | -11.334714655 | -21.677501481 | -8.299077932  | 1 | 1 | 1 | # | ob |
| 2626 | 16 | 4 | -1.050000 | -15.376917264 | -26.305096126 | -6.100653738  | 1 | 1 | 1 | # | ob |
| 2627 | 16 | 4 | -1.050000 | -12.788239092 | -27.048710300 | -6.099420289  | 1 | 1 | 1 | # | ob |
| 2628 | 16 | 7 | -0.950000 | -13.530842343 | 26.728240996  | -8.319917115  | 1 | 0 | 1 | # | oh |
| 2629 | 16 | 4 | -1.050000 | -10.863018349 | 26.731276970  | -6.271017583  | 1 | 0 | 1 | # | ob |
| 2630 | 16 | 7 | -0.950000 | -10.942492343 | -24.453609004 | -8.319917115  | 1 | 1 | 1 | # | oh |
| 2631 | 16 | 4 | -1.050000 | -13.451368349 | -24.450573030 | -6.271017583  | 1 | 1 | 1 | # | ob |
| 2632 | 16 | 5 | -0.950000 | -12.352657657 | -20.000940996 | -10.345082885 | 1 | 1 | 1 | # | oh |
| 2633 | 16 | 6 | -0.950000 | -15.020481651 | -20.003976970 | -12.393982417 | 1 | 1 | 1 | # | oh |
| 2634 | 16 | 7 | -0.950000 | -14.941007657 | -24.455490996 | -10.345082885 | 1 | 1 | 1 | # | oh |
| 2635 | 16 | 4 | -1.050000 | -12.432131651 | -24.458526970 | -12.393982417 | 1 | 1 | 1 | # | ob |
| 2636 | 16 | 4 | -1.050000 | -11.335294487 | -27.228199320 | -8.298868622  | 1 | 1 | 1 | # | ob |
| 2637 | 16 | 4 | -1.050000 | -15.376589092 | -22.594160300 | -6.099420289  | 1 | 1 | 1 | # | ob |
| 2638 | 16 | 4 | -1.050000 | -11.960435345 | -22.777048519 | -10.365922068 | 1 | 1 | 1 | # | ob |
| 2639 | 16 | 4 | -1.050000 | -13.094932736 | -27.058553874 | -12.564346262 | 1 | 1 | 1 | # | ob |
| 2640 | 16 | 8 | 2.100000  | -11.307102986 | -27.381980796 | -6.669722830  | 1 | 1 | 1 | # | st |
| 2641 | 16 | 8 | 2.100000  | -11.988072226 | -22.935729218 | -11.994298097 | 1 | 1 | 1 | # | st |
| 2642 | 16 | 8 | 2.100000  | -14.576397014 | -21.527119204 | -11.995277170 | 1 | 1 | 1 | # | st |
| 2643 | 16 | 8 | 2.100000  | -11.988047014 | -25.981669204 | -11.995277170 | 1 | 1 | 1 | # | st |
| 2644 | 16 | 8 | 2.100000  | -11.307077774 | -21.518820782 | -6.670701903  | 1 | 1 | 1 | # | st |
| 2645 | 16 | 8 | 2.100000  | -13.895427774 | -25.973370782 | -6.670701903  | 1 | 1 | 1 | # | st |
| 2646 | 16 | 8 | 2.100000  | -13.895452986 | -22.927430796 | -6.669722830  | 1 | 1 | 1 | # | st |
| 2647 | 16 | 8 | 2.100000  | -14.576422226 | -27.390279218 | -11.994298097 | 1 | 1 | 1 | # | st |
| 2648 | 16 | 6 | -0.950000 | -10.792633573 | -19.680858114 | 2.588720950   | 1 | 1 | 1 | # | oh |
| 2649 | 16 | 6 | -0.950000 | -15.225161797 | -0.272172439  | -2.801727113  | 1 | 0 | 1 | # | oh |
| 2650 | 16 | 3 | 0.425000  | 15.486672253  | -1.308055357  | -2.995860493  | 0 | 0 | 1 | # | do |
| 2651 | 16 | 3 | 0.425000  | -10.530111381 | -1.054326608  | 3.097070537   | 1 | 0 | 1 | # | do |
| 2652 | 16 | 3 | 0.425000  | -10.666251036 | -18.596754758 | 2.386613544   | 1 | 1 | 1 | # | do |
| 2653 | 16 | 3 | 0.425000  | -15.417051085 | -19.012312375 | -3.363863051  | 1 | 1 | 1 | # | do |
| 2654 | 17 | 1 | 1.575000  | -7.764844971  | 1.474661568   | -9.332229368  | 1 | 0 | 1 | # | ao |
| 2655 | 17 | 1 | 1.575000  | -10.353194971 | 5.929211568   | -9.332229368  | 1 | 0 | 1 | # | ao |
| 2656 | 17 | 1 | 1.575000  | -7.765255029  | 7.434438432   | -9.332770632  | 1 | 0 | 1 | # | ao |
| 2657 | 17 | 1 | 1.575000  | -5.176905029  | 2.979888432   | -9.332770632  | 1 | 0 | 1 | # | ao |
| 2658 | 17 | 2 | 0.425000  | -6.618749128  | 4.457267322   | -7.846384937  | 1 | 0 | 1 | # | ho |
| 2659 | 17 | 3 | 0.425000  | -9.207099128  | 0.002717322   | -7.846384937  | 1 | 0 | 1 | # | do |
| 2660 | 17 | 2 | 0.425000  | -8.911350872  | 4.451832678   | -10.818615063 | 1 | 0 | 1 | # | ho |
| 2661 | 17 | 2 | 0.425000  | -6.323000872  | 8.906382678   | -10.818615063 | 1 | 0 | 1 | # | ho |
| 2662 | 17 | 4 | -1.050000 | -9.372085345  | 1.677501481   | -10.365922068 | 1 | 0 | 1 | # | ob |
| 2663 | 17 | 4 | -1.050000 | -5.329882736  | 6.305096126   | -12.564346262 | 1 | 0 | 1 | # | ob |
| 2664 | 17 | 4 | -1.050000 | -6.783155513  | 2.773649320   | -10.366131378 | 1 | 0 | 1 | # | ob |
| 2665 | 17 | 4 | -1.050000 | -7.918560908  | 7.048710300   | -12.565579711 | 1 | 0 | 1 | # | ob |
| 2666 | 17 | 4 | -1.050000 | -9.371505513  | 7.228199320   | -10.366131378 | 1 | 0 | 1 | # | ob |
| 2667 | 17 | 4 | -1.050000 | -8.746944487  | 6.135450680   | -8.298868622  | 1 | 0 | 1 | # | ob |
| 2668 | 17 | 4 | -1.050000 | -5.330210908  | 2.594160300   | -12.565579711 | 1 | 0 | 1 | # | ob |
| 2669 | 17 | 4 | -1.050000 | -8.746364655  | 2.777048519   | -8.299077932  | 1 | 0 | 1 | # | ob |
| 2670 | 17 | 4 | -1.050000 | -7.611867264  | 7.058553874   | -6.100653738  | 1 | 0 | 1 | # | ob |
| 2671 | 17 | 4 | -1.050000 | -6.158014655  | 7.231598519   | -8.299077932  | 1 | 0 | 1 | # | ob |
| 2672 | 17 | 4 | -1.050000 | -10.200217264 | 2.604003874   | -6.100653738  | 1 | 0 | 1 | # | ob |
| 2673 | 17 | 4 | -1.050000 | -7.611539092  | 1.860389700   | -6.099420289  | 1 | 0 | 1 | # | ob |
| 2674 | 17 | 5 | -0.950000 | -8.354142343  | 0.000940996   | -8.319917115  | 1 | 0 | 1 | # | oh |
| 2675 | 17 | 6 | -0.950000 | -5.686318349  | 0.003976970   | -6.271017583  | 1 | 0 | 1 | # | oh |
| 2676 | 17 | 7 | -0.950000 | -5.765792343  | 4.455490996   | -8.319917115  | 1 | 0 | 1 | # | oh |
| 2677 | 17 | 4 | -1.050000 | -8.274668349  | 4.458526970   | -6.271017583  | 1 | 0 | 1 | # | ob |
| 2678 | 17 | 7 | -0.950000 | -7.175957657  | 8.908159004   | -10.345082885 | 1 | 0 | 1 | # | oh |
| 2679 | 17 | 4 | -1.050000 | -9.843781651  | 8.905123030   | -12.393982417 | 1 | 0 | 1 | # | ob |
| 2680 | 17 | 7 | -0.950000 | -9.764307657  | 4.453609004   | -10.345082885 | 1 | 0 | 1 | # | oh |
| 2681 | 17 | 4 | -1.050000 | -7.255431651  | 4.450573030   | -12.393982417 | 1 | 0 | 1 | # | ob |
| 2682 | 17 | 4 | -1.050000 | -6.158594487  | 1.680900680   | -8.298868622  | 1 | 0 | 1 | # | ob |
| 2683 | 17 | 4 | -1.050000 | -10.199889092 | 6.314939700   | -6.099420289  | 1 | 0 | 1 | # | ob |
| 2684 | 17 | 4 | -1.050000 | -6.783735345  | 6.132051481   | -10.365922068 | 1 | 0 | 1 | # | ob |
| 2685 | 17 | 4 | -1.050000 | -7.918232736  | 1.850546126   | -12.564346262 | 1 | 0 | 1 | # | ob |
| 2686 | 17 | 8 | 2.100000  | -6.130402986  | 1.527119204   | -6.669722830  | 1 | 0 | 1 | # | st |
| 2687 | 17 | 8 | 2.100000  | -6.811372226  | 5.973370782   | -11.994298097 | 1 | 0 | 1 | # | st |
| 2688 | 17 | 8 | 2.100000  | -9.399697014  | 7.381980796   | -11.995277170 | 1 | 0 | 1 | # | st |
| 2689 | 17 | 8 | 2.100000  | -6.811347014  | 2.927430796   | -11.995277170 | 1 | 0 | 1 | # | st |

|      |    |   |           |               |               |               |   |   |   |   |    |
|------|----|---|-----------|---------------|---------------|---------------|---|---|---|---|----|
| 2690 | 17 | 8 | 2.100000  | -6.130377774  | 7.390279218   | -6.670701903  | 1 | 0 | 1 | # | st |
| 2691 | 17 | 8 | 2.100000  | -8.718727774  | 2.935729218   | -6.670701903  | 1 | 0 | 1 | # | st |
| 2692 | 17 | 8 | 2.100000  | -8.718752986  | 5.981669204   | -6.669722830  | 1 | 0 | 1 | # | st |
| 2693 | 17 | 8 | 2.100000  | -9.399722226  | 1.518820782   | -11.994298097 | 1 | 0 | 1 | # | st |
| 2694 | 17 | 1 | 1.575000  | -7.764844971  | 10.383761568  | -9.332229368  | 1 | 0 | 1 | # | ao |
| 2695 | 17 | 1 | 1.575000  | -10.353194971 | 14.838311568  | -9.332229368  | 1 | 0 | 1 | # | ao |
| 2696 | 17 | 1 | 1.575000  | -7.765255029  | 16.343538432  | -9.332770632  | 1 | 0 | 1 | # | ao |
| 2697 | 17 | 1 | 1.575000  | -5.176905029  | 11.888988432  | -9.332770632  | 1 | 0 | 1 | # | ao |
| 2698 | 17 | 2 | 0.425000  | -6.618749128  | 13.366367322  | -7.846384937  | 1 | 0 | 1 | # | ho |
| 2699 | 17 | 2 | 0.425000  | -9.207099128  | 8.911817322   | -7.846384937  | 1 | 0 | 1 | # | ho |
| 2700 | 17 | 2 | 0.425000  | -8.911350872  | 13.360932678  | -10.818615063 | 1 | 0 | 1 | # | ho |
| 2701 | 17 | 2 | 0.425000  | -6.323000872  | 17.815482678  | -10.818615063 | 1 | 0 | 1 | # | ho |
| 2702 | 17 | 4 | -1.050000 | -9.372085345  | 10.586601481  | -10.365922068 | 1 | 0 | 1 | # | ob |
| 2703 | 17 | 4 | -1.050000 | -5.329882736  | 15.214196126  | -12.564346262 | 1 | 0 | 1 | # | ob |
| 2704 | 17 | 4 | -1.050000 | -6.783155513  | 11.682749320  | -10.366131378 | 1 | 0 | 1 | # | ob |
| 2705 | 17 | 4 | -1.050000 | -7.918560908  | 15.957810300  | -12.565579711 | 1 | 0 | 1 | # | ob |
| 2706 | 17 | 4 | -1.050000 | -9.371505513  | 16.137299320  | -10.366131378 | 1 | 0 | 1 | # | ob |
| 2707 | 17 | 4 | -1.050000 | -8.746944487  | 15.044550680  | -8.298868622  | 1 | 0 | 1 | # | ob |
| 2708 | 17 | 4 | -1.050000 | -5.330210908  | 11.503260300  | -12.565579711 | 1 | 0 | 1 | # | ob |
| 2709 | 17 | 4 | -1.050000 | -8.746364655  | 11.686148519  | -8.299077932  | 1 | 0 | 1 | # | ob |
| 2710 | 17 | 4 | -1.050000 | -7.611867264  | 15.967653874  | -6.100653738  | 1 | 0 | 1 | # | ob |
| 2711 | 17 | 4 | -1.050000 | -6.158014655  | 16.140698519  | -8.299077932  | 1 | 0 | 1 | # | ob |
| 2712 | 17 | 4 | -1.050000 | -10.200217264 | 11.513103874  | -6.100653738  | 1 | 0 | 1 | # | ob |
| 2713 | 17 | 4 | -1.050000 | -7.611539092  | 10.769489700  | -6.099420289  | 1 | 0 | 1 | # | ob |
| 2714 | 17 | 7 | -0.950000 | -8.354142343  | 8.910040996   | -8.319917115  | 1 | 0 | 1 | # | oh |
| 2715 | 17 | 4 | -1.050000 | -5.686318349  | 8.913076970   | -6.271017583  | 1 | 0 | 1 | # | ob |
| 2716 | 17 | 7 | -0.950000 | -5.765792343  | 13.364590996  | -8.319917115  | 1 | 0 | 1 | # | oh |
| 2717 | 17 | 4 | -1.050000 | -8.274668349  | 13.367626970  | -6.271017583  | 1 | 0 | 1 | # | ob |
| 2718 | 17 | 7 | -0.950000 | -7.175957657  | 17.817259004  | -10.345082885 | 1 | 0 | 1 | # | oh |
| 2719 | 17 | 4 | -1.050000 | -9.843781651  | 17.814223030  | -12.393982417 | 1 | 0 | 1 | # | ob |
| 2720 | 17 | 7 | -0.950000 | -9.764307657  | 13.362709004  | -10.345082885 | 1 | 0 | 1 | # | oh |
| 2721 | 17 | 4 | -1.050000 | -7.255431651  | 13.359673030  | -12.393982417 | 1 | 0 | 1 | # | ob |
| 2722 | 17 | 4 | -1.050000 | -6.158594487  | 10.590000680  | -8.298868622  | 1 | 0 | 1 | # | ob |
| 2723 | 17 | 4 | -1.050000 | -10.199889092 | 15.224039700  | -6.099420289  | 1 | 0 | 1 | # | ob |
| 2724 | 17 | 4 | -1.050000 | -6.783735345  | 15.041151481  | -10.365922068 | 1 | 0 | 1 | # | ob |
| 2725 | 17 | 4 | -1.050000 | -7.918232736  | 10.759646126  | -12.564346262 | 1 | 0 | 1 | # | ob |
| 2726 | 17 | 8 | 2.100000  | -6.130402986  | 10.436219204  | -6.669722830  | 1 | 0 | 1 | # | st |
| 2727 | 17 | 8 | 2.100000  | -6.811372226  | 14.882470782  | -11.994298097 | 1 | 0 | 1 | # | st |
| 2728 | 17 | 8 | 2.100000  | -9.399697014  | 16.291080796  | -11.995277170 | 1 | 0 | 1 | # | st |
| 2729 | 17 | 8 | 2.100000  | -6.811347014  | 11.836530796  | -11.995277170 | 1 | 0 | 1 | # | st |
| 2730 | 17 | 8 | 2.100000  | -6.130377774  | 16.299379218  | -6.670701903  | 1 | 0 | 1 | # | st |
| 2731 | 17 | 8 | 2.100000  | -8.718727774  | 11.844829218  | -6.670701903  | 1 | 0 | 1 | # | st |
| 2732 | 17 | 8 | 2.100000  | -8.718752986  | 14.890769204  | -6.669722830  | 1 | 0 | 1 | # | st |
| 2733 | 17 | 8 | 2.100000  | -9.399722226  | 10.427920782  | -11.994298097 | 1 | 0 | 1 | # | st |
| 2734 | 17 | 1 | 1.575000  | -7.764844971  | 19.292861568  | -9.332229368  | 1 | 0 | 1 | # | ao |
| 2735 | 17 | 1 | 1.575000  | -10.353194971 | 23.747411568  | -9.332229368  | 1 | 0 | 1 | # | ao |
| 2736 | 17 | 1 | 1.575000  | -7.765255029  | 25.252638432  | -9.332770632  | 1 | 0 | 1 | # | ao |
| 2737 | 17 | 1 | 1.575000  | -5.176905029  | 20.798088432  | -9.332770632  | 1 | 0 | 1 | # | ao |
| 2738 | 17 | 2 | 0.425000  | -6.618749128  | 22.275467322  | -7.846384937  | 1 | 0 | 1 | # | ho |
| 2739 | 17 | 2 | 0.425000  | -9.207099128  | 17.820917322  | -7.846384937  | 1 | 0 | 1 | # | ho |
| 2740 | 17 | 2 | 0.425000  | -8.911350872  | 22.270032678  | -10.818615063 | 1 | 0 | 1 | # | ho |
| 2741 | 17 | 2 | 0.425000  | -6.323000872  | 26.724582678  | -10.818615063 | 1 | 0 | 1 | # | ho |
| 2742 | 17 | 4 | -1.050000 | -9.372085345  | 19.495701481  | -10.365922068 | 1 | 0 | 1 | # | ob |
| 2743 | 17 | 4 | -1.050000 | -5.329882736  | 24.123296126  | -12.564346262 | 1 | 0 | 1 | # | ob |
| 2744 | 17 | 4 | -1.050000 | -6.783155513  | 20.591849320  | -10.366131378 | 1 | 0 | 1 | # | ob |
| 2745 | 17 | 4 | -1.050000 | -7.918560908  | 24.866910300  | -12.565579711 | 1 | 0 | 1 | # | ob |
| 2746 | 17 | 4 | -1.050000 | -9.371505513  | 25.046399320  | -10.366131378 | 1 | 0 | 1 | # | ob |
| 2747 | 17 | 4 | -1.050000 | -8.746944487  | 23.953650680  | -8.298868622  | 1 | 0 | 1 | # | ob |
| 2748 | 17 | 4 | -1.050000 | -5.330210908  | 20.412360300  | -12.565579711 | 1 | 0 | 1 | # | ob |
| 2749 | 17 | 4 | -1.050000 | -8.746364655  | 20.595248519  | -8.299077932  | 1 | 0 | 1 | # | ob |
| 2750 | 17 | 4 | -1.050000 | -7.611867264  | 24.876753874  | -6.100653738  | 1 | 0 | 1 | # | ob |
| 2751 | 17 | 4 | -1.050000 | -6.158014655  | 25.049798519  | -8.299077932  | 1 | 0 | 1 | # | ob |
| 2752 | 17 | 4 | -1.050000 | -10.200217264 | 20.422203874  | -6.100653738  | 1 | 0 | 1 | # | ob |
| 2753 | 17 | 4 | -1.050000 | -7.611539092  | 19.678589700  | -6.099420289  | 1 | 0 | 1 | # | ob |
| 2754 | 17 | 7 | -0.950000 | -8.354142343  | 17.819140996  | -8.319917115  | 1 | 0 | 1 | # | oh |
| 2755 | 17 | 4 | -1.050000 | -5.686318349  | 17.822176970  | -6.271017583  | 1 | 0 | 1 | # | ob |
| 2756 | 17 | 7 | -0.950000 | -5.765792343  | 22.273690996  | -8.319917115  | 1 | 0 | 1 | # | oh |
| 2757 | 17 | 4 | -1.050000 | -8.274668349  | 22.276726970  | -6.271017583  | 1 | 0 | 1 | # | ob |
| 2758 | 17 | 7 | -0.950000 | -7.175957657  | 26.726359004  | -10.345082885 | 1 | 0 | 1 | # | oh |
| 2759 | 17 | 4 | -1.050000 | -9.843781651  | 26.723323030  | -12.393982417 | 1 | 0 | 1 | # | ob |
| 2760 | 17 | 7 | -0.950000 | -9.764307657  | 22.271809004  | -10.345082885 | 1 | 0 | 1 | # | oh |
| 2761 | 17 | 4 | -1.050000 | -7.255431651  | 22.268773030  | -12.393982417 | 1 | 0 | 1 | # | ob |
| 2762 | 17 | 4 | -1.050000 | -6.158594487  | 19.499100680  | -8.298868622  | 1 | 0 | 1 | # | ob |
| 2763 | 17 | 4 | -1.050000 | -10.199889092 | 24.133139700  | -6.099420289  | 1 | 0 | 1 | # | ob |
| 2764 | 17 | 4 | -1.050000 | -6.783735345  | 23.950251481  | -10.365922068 | 1 | 0 | 1 | # | ob |
| 2765 | 17 | 4 | -1.050000 | -7.918232736  | 19.668746126  | -12.564346262 | 1 | 0 | 1 | # | ob |
| 2766 | 17 | 8 | 2.100000  | -6.130402986  | 19.345319204  | -6.669722830  | 1 | 0 | 1 | # | st |
| 2767 | 17 | 8 | 2.100000  | -6.811372226  | 23.791570782  | -11.994298097 | 1 | 0 | 1 | # | st |
| 2768 | 17 | 8 | 2.100000  | -9.399697014  | 25.200180796  | -11.995277170 | 1 | 0 | 1 | # | st |
| 2769 | 17 | 8 | 2.100000  | -6.811347014  | 20.745630796  | -11.995277170 | 1 | 0 | 1 | # | st |
| 2770 | 17 | 8 | 2.100000  | -6.130377774  | 25.208479218  | -6.670701903  | 1 | 0 | 1 | # | st |
| 2771 | 17 | 8 | 2.100000  | -8.718727774  | 20.753929218  | -6.670701903  | 1 | 0 | 1 | # | st |
| 2772 | 17 | 8 | 2.100000  | -8.718752986  | 23.799869204  | -6.669722830  | 1 | 0 | 1 | # | st |
| 2773 | 17 | 8 | 2.100000  | -9.399722226  | 19.337020782  | -11.994298097 | 1 | 0 | 1 | # | st |
| 2774 | 17 | 1 | 1.575000  | -7.764844971  | -27.434438432 | -9.332229368  | 1 | 1 | 1 | # | ao |
| 2775 | 17 | 1 | 1.575000  | -10.353194971 | -22.979888432 | -9.332229368  | 1 | 1 | 1 | # | ao |
| 2776 | 17 | 1 | 1.575000  | -7.765255029  | -21.474661568 | -9.332770632  | 1 | 1 | 1 | # | ao |
| 2777 | 17 | 1 | 1.575000  | -5.176905029  | -25.929211568 | -9.332770632  | 1 | 1 | 1 | # | ao |
| 2778 | 17 | 2 | 0.425000  | -6.618749128  | -24.451832678 | -7.846384937  | 1 | 1 | 1 | # | ho |
| 2779 | 17 | 2 | 0.425000  | -9.207099128  | 26.730017322  | -7.846384937  | 1 | 0 | 1 | # | ho |
| 2780 | 17 | 2 | 0.425000  | -8.911350872  | -24.457267322 | -10.818615063 | 1 | 1 | 1 | # | ho |
| 2781 | 17 | 3 | 0.425000  | -6.323000872  | -20.002717322 | -10.818615063 | 1 | 1 | 1 | # | do |
| 2782 | 17 | 4 | -1.050000 | -9.372085345  | -27.231598519 | -10.365922068 | 1 | 1 | 1 | # | ob |

|      |    |   |           |               |               |               |   |   |   |   |     |
|------|----|---|-----------|---------------|---------------|---------------|---|---|---|---|-----|
| 2783 | 17 | 4 | -1.050000 | -5.329882736  | -22.604003874 | -12.564346262 | 1 | 1 | 1 | # | ob  |
| 2784 | 17 | 4 | -1.050000 | -6.783155513  | -26.135450680 | -10.366131378 | 1 | 1 | 1 | # | ob  |
| 2785 | 17 | 4 | -1.050000 | -7.918560908  | -21.860389700 | -12.565579711 | 1 | 1 | 1 | # | ob  |
| 2786 | 17 | 4 | -1.050000 | -9.371505513  | -21.680900680 | -10.366131378 | 1 | 1 | 1 | # | ob  |
| 2787 | 17 | 4 | -1.050000 | -8.746944487  | -22.773649320 | -8.298868622  | 1 | 1 | 1 | # | ob  |
| 2788 | 17 | 4 | -1.050000 | -5.330210908  | -26.314939700 | -12.565579711 | 1 | 1 | 1 | # | ob  |
| 2789 | 17 | 4 | -1.050000 | -8.746364655  | -26.132051481 | -8.299077932  | 1 | 1 | 1 | # | ob  |
| 2790 | 17 | 4 | -1.050000 | -7.611867264  | -21.850546126 | -6.100653738  | 1 | 1 | 1 | # | ob  |
| 2791 | 17 | 4 | -1.050000 | -6.158014655  | -21.677501481 | -8.299077932  | 1 | 1 | 1 | # | ob  |
| 2792 | 17 | 4 | -1.050000 | -10.200217264 | -26.305096126 | -6.100653738  | 1 | 1 | 1 | # | ob  |
| 2793 | 17 | 4 | -1.050000 | -7.611539092  | -27.048710300 | -6.099420289  | 1 | 1 | 1 | # | ob  |
| 2794 | 17 | 7 | -0.950000 | -8.354142343  | 26.728240996  | -8.319917115  | 1 | 0 | 1 | # | oh  |
| 2795 | 17 | 4 | -1.050000 | -5.686318349  | 26.731276970  | -6.271017583  | 1 | 0 | 1 | # | ob  |
| 2796 | 17 | 7 | -0.950000 | -5.765792343  | -24.453609004 | -8.319917115  | 1 | 1 | 1 | # | oh  |
| 2797 | 17 | 4 | -1.050000 | -8.274668349  | -24.450573030 | -6.271017583  | 1 | 1 | 1 | # | ob  |
| 2798 | 17 | 5 | -0.950000 | -7.175957657  | -20.000940996 | -10.345082885 | 1 | 1 | 1 | # | oh  |
| 2799 | 17 | 6 | -0.950000 | -9.843781651  | -20.003976970 | -12.393982417 | 1 | 1 | 1 | # | oh  |
| 2800 | 17 | 7 | -0.950000 | -9.764307657  | -24.455490996 | -10.345082885 | 1 | 1 | 1 | # | oh  |
| 2801 | 17 | 4 | -1.050000 | -7.255431651  | -24.458526970 | -12.393982417 | 1 | 1 | 1 | # | ob  |
| 2802 | 17 | 4 | -1.050000 | -6.158594487  | -27.228199320 | -8.298868622  | 1 | 1 | 1 | # | ob  |
| 2803 | 17 | 4 | -1.050000 | -10.199889092 | -22.594160300 | -6.099420289  | 1 | 1 | 1 | # | ob  |
| 2804 | 17 | 4 | -1.050000 | -6.783735345  | -22.777048519 | -10.365922068 | 1 | 1 | 1 | # | ob  |
| 2805 | 17 | 4 | -1.050000 | -7.918232736  | -27.058553874 | -12.564346262 | 1 | 1 | 1 | # | ob  |
| 2806 | 17 | 8 | 2.100000  | -6.130402986  | -27.381980796 | -6.669722830  | 1 | 1 | 1 | # | st  |
| 2807 | 17 | 8 | 2.100000  | -6.811372226  | -22.935729218 | -11.994298097 | 1 | 1 | 1 | # | st  |
| 2808 | 17 | 8 | 2.100000  | -9.399697014  | -21.527119204 | -11.995277170 | 1 | 1 | 1 | # | st  |
| 2809 | 17 | 8 | 2.100000  | -6.811347014  | -25.981669204 | -11.995277170 | 1 | 1 | 1 | # | st  |
| 2810 | 17 | 8 | 2.100000  | -6.130377774  | -21.518820782 | -6.670701903  | 1 | 1 | 1 | # | st  |
| 2811 | 17 | 8 | 2.100000  | -8.718727774  | -25.973370782 | -6.670701903  | 1 | 1 | 1 | # | st  |
| 2812 | 17 | 8 | 2.100000  | -8.718752986  | -22.927430796 | -6.669722830  | 1 | 1 | 1 | # | st  |
| 2813 | 17 | 8 | 2.100000  | -9.399722226  | -27.390279218 | -11.994298097 | 1 | 1 | 1 | # | st  |
| 2814 | 17 | 6 | -0.950000 | -5.615933573  | -19.680885114 | 2.588720950   | 1 | 1 | 1 | # | oht |
| 2815 | 17 | 6 | -0.950000 | -10.048461797 | -0.272172439  | -2.801727113  | 1 | 0 | 1 | # | oht |
| 2816 | 17 | 3 | 0.425000  | -10.396827747 | -1.308055357  | -2.995860493  | 1 | 0 | 1 | # | do  |
| 2817 | 17 | 3 | 0.425000  | -5.353411381  | -1.054326608  | 3.097070537   | 1 | 0 | 1 | # | do  |
| 2818 | 17 | 3 | 0.425000  | -5.489551036  | -18.596754758 | 2.386613544   | 1 | 1 | 1 | # | do  |
| 2819 | 17 | 3 | 0.425000  | -10.240351085 | -19.012312375 | -3.363863051  | 1 | 1 | 1 | # | do  |
| 2820 | 18 | 1 | 1.575000  | -2.588144971  | 1.474661568   | -9.332229368  | 1 | 0 | 1 | # | ao  |
| 2821 | 18 | 1 | 1.575000  | -5.176494971  | 5.929211568   | -9.332229368  | 1 | 0 | 1 | # | ao  |
| 2822 | 18 | 1 | 1.575000  | -2.588555029  | 7.434438432   | -9.332770632  | 1 | 0 | 1 | # | ao  |
| 2823 | 18 | 1 | 1.575000  | -0.000205029  | 2.979888432   | -9.332770632  | 1 | 0 | 1 | # | ao  |
| 2824 | 18 | 2 | 0.425000  | -1.442049128  | 4.457267322   | -7.846384937  | 1 | 0 | 1 | # | ho  |
| 2825 | 18 | 3 | 0.425000  | -4.030399128  | 0.002717322   | -7.846384937  | 1 | 0 | 1 | # | do  |
| 2826 | 18 | 2 | 0.425000  | -3.734650872  | 4.451832678   | -10.818615063 | 1 | 0 | 1 | # | ho  |
| 2827 | 18 | 2 | 0.425000  | -1.146300872  | 8.906382678   | -10.818615063 | 1 | 0 | 1 | # | ho  |
| 2828 | 18 | 4 | -1.050000 | -4.195385345  | 1.677501481   | -10.365922068 | 1 | 0 | 1 | # | ob  |
| 2829 | 18 | 4 | -1.050000 | -0.153182736  | 6.305096126   | -12.564346262 | 1 | 0 | 1 | # | ob  |
| 2830 | 18 | 4 | -1.050000 | -1.606455513  | 2.773649320   | -10.366131378 | 1 | 0 | 1 | # | ob  |
| 2831 | 18 | 4 | -1.050000 | -2.741860908  | 7.048710300   | -12.565579711 | 1 | 0 | 1 | # | ob  |
| 2832 | 18 | 4 | -1.050000 | -4.194805513  | 7.228199320   | -10.366131378 | 1 | 0 | 1 | # | ob  |
| 2833 | 18 | 4 | -1.050000 | -3.570244487  | 6.135450680   | -8.298868622  | 1 | 0 | 1 | # | ob  |
| 2834 | 18 | 4 | -1.050000 | -0.153510908  | 2.594160300   | -12.565579711 | 1 | 0 | 1 | # | ob  |
| 2835 | 18 | 4 | -1.050000 | -3.569664655  | 2.777048519   | -8.299077932  | 1 | 0 | 1 | # | ob  |
| 2836 | 18 | 4 | -1.050000 | -2.435167264  | 7.058553874   | -6.100653738  | 1 | 0 | 1 | # | ob  |
| 2837 | 18 | 4 | -1.050000 | -0.981314655  | 7.231598519   | -8.299077932  | 1 | 0 | 1 | # | ob  |
| 2838 | 18 | 4 | -1.050000 | -5.023517264  | 2.604003874   | -6.100653738  | 1 | 0 | 1 | # | ob  |
| 2839 | 18 | 4 | -1.050000 | -2.434839092  | 1.860389700   | -6.099420289  | 1 | 0 | 1 | # | ob  |
| 2840 | 18 | 5 | -0.950000 | -3.177442343  | 0.000940996   | -8.319917115  | 1 | 0 | 1 | # | oh  |
| 2841 | 18 | 6 | -0.950000 | -0.509618349  | 0.003976970   | -6.271017583  | 1 | 0 | 1 | # | oh  |
| 2842 | 18 | 7 | -0.950000 | -0.589092343  | 4.455490996   | -8.319917115  | 1 | 0 | 1 | # | oh  |
| 2843 | 18 | 4 | -1.050000 | -3.097968349  | 4.458526970   | -6.271017583  | 1 | 0 | 1 | # | ob  |
| 2844 | 18 | 7 | -0.950000 | -1.999257657  | 8.908159004   | -10.345082885 | 1 | 0 | 1 | # | oh  |
| 2845 | 18 | 4 | -1.050000 | -4.667081651  | 8.905123030   | -12.393982417 | 1 | 0 | 1 | # | ob  |
| 2846 | 18 | 7 | -0.950000 | -4.587607657  | 4.453609004   | -10.345082885 | 1 | 0 | 1 | # | oh  |
| 2847 | 18 | 4 | -1.050000 | -2.078731651  | 4.450573030   | -12.393982417 | 1 | 0 | 1 | # | ob  |
| 2848 | 18 | 4 | -1.050000 | -0.981894487  | 1.680900680   | -8.298868622  | 1 | 0 | 1 | # | ob  |
| 2849 | 18 | 4 | -1.050000 | -5.023189092  | 6.314939700   | -6.099420289  | 1 | 0 | 1 | # | ob  |
| 2850 | 18 | 4 | -1.050000 | -1.607035345  | 6.132051481   | -10.365922068 | 1 | 0 | 1 | # | ob  |
| 2851 | 18 | 4 | -1.050000 | -2.741532736  | 1.850546126   | -12.564346262 | 1 | 0 | 1 | # | ob  |
| 2852 | 18 | 8 | 2.100000  | -0.953702986  | 1.527119204   | -6.669722830  | 1 | 0 | 1 | # | st  |
| 2853 | 18 | 8 | 2.100000  | -1.634672226  | 5.973370782   | -11.994298097 | 1 | 0 | 1 | # | st  |
| 2854 | 18 | 8 | 2.100000  | -4.222997014  | 7.381980796   | -11.995277170 | 1 | 0 | 1 | # | st  |
| 2855 | 18 | 8 | 2.100000  | -1.634647014  | 2.927430796   | -11.995277170 | 1 | 0 | 1 | # | st  |
| 2856 | 18 | 8 | 2.100000  | -0.953677774  | 7.390279218   | -6.670701903  | 1 | 0 | 1 | # | st  |
| 2857 | 18 | 8 | 2.100000  | -3.542027774  | 2.935729218   | -6.670701903  | 1 | 0 | 1 | # | st  |
| 2858 | 18 | 8 | 2.100000  | -3.542052986  | 5.981669204   | -6.669722830  | 1 | 0 | 1 | # | st  |
| 2859 | 18 | 8 | 2.100000  | -4.223022226  | 1.518820782   | -11.994298097 | 1 | 0 | 1 | # | st  |
| 2860 | 18 | 1 | 1.575000  | -2.588144971  | 10.383761568  | -9.332229368  | 1 | 0 | 1 | # | ao  |
| 2861 | 18 | 1 | 1.575000  | -5.176494971  | 14.838311568  | -9.332229368  | 1 | 0 | 1 | # | ao  |
| 2862 | 18 | 1 | 1.575000  | -2.588555029  | 16.343538432  | -9.332770632  | 1 | 0 | 1 | # | ao  |
| 2863 | 18 | 1 | 1.575000  | -0.000205029  | 11.888988432  | -9.332770632  | 1 | 0 | 1 | # | ao  |
| 2864 | 18 | 2 | 0.425000  | -1.442049128  | 13.366367322  | -7.846384937  | 1 | 0 | 1 | # | ho  |
| 2865 | 18 | 2 | 0.425000  | -4.030399128  | 8.911817322   | -7.846384937  | 1 | 0 | 1 | # | ho  |
| 2866 | 18 | 2 | 0.425000  | -3.734650872  | 13.360932678  | -10.818615063 | 1 | 0 | 1 | # | ho  |
| 2867 | 18 | 2 | 0.425000  | -1.146300872  | 17.815482678  | -10.818615063 | 1 | 0 | 1 | # | ho  |
| 2868 | 18 | 4 | -1.050000 | -4.195385345  | 10.586601481  | -10.365922068 | 1 | 0 | 1 | # | ob  |
| 2869 | 18 | 4 | -1.050000 | -0.153182736  | 15.214196126  | -12.564346262 | 1 | 0 | 1 | # | ob  |
| 2870 | 18 | 4 | -1.050000 | -1.606455513  | 11.682749320  | -10.366131378 | 1 | 0 | 1 | # | ob  |
| 2871 | 18 | 4 | -1.050000 | -2.741860908  | 15.957810300  | -12.565579711 | 1 | 0 | 1 | # | ob  |
| 2872 | 18 | 4 | -1.050000 | -4.194805513  | 16.137299320  | -10.366131378 | 1 | 0 | 1 | # | ob  |
| 2873 | 18 | 4 | -1.050000 | -3.570244487  | 15.044550680  | -8.298868622  | 1 | 0 | 1 | # | ob  |
| 2874 | 18 | 4 | -1.050000 | -0.153510908  | 11.503260300  | -12.565579711 | 1 | 0 | 1 | # | ob  |
| 2875 | 18 | 4 | -1.050000 | -3.569664655  | 11.686148519  | -8.299077932  | 1 | 0 | 1 | # | ob  |



|      |    |   |           |              |               |               |   |   |   |   |     |
|------|----|---|-----------|--------------|---------------|---------------|---|---|---|---|-----|
| 2876 | 18 | 4 | -1.050000 | -2.435167264 | 15.967653874  | -6.100653738  | 1 | 0 | 1 | # | ob  |
| 2877 | 18 | 4 | -1.050000 | -0.981314655 | 16.140698519  | -8.299077932  | 1 | 0 | 1 | # | ob  |
| 2878 | 18 | 4 | -1.050000 | -5.023517264 | 11.513103874  | -6.100653738  | 1 | 0 | 1 | # | ob  |
| 2879 | 18 | 4 | -1.050000 | -2.434839092 | 10.769489700  | -6.099420289  | 1 | 0 | 1 | # | ob  |
| 2880 | 18 | 7 | -0.950000 | -3.177442343 | 8.910040996   | -8.319917115  | 1 | 0 | 1 | # | oh  |
| 2881 | 18 | 4 | -1.050000 | -0.509618349 | 8.913076970   | -6.271017583  | 1 | 0 | 1 | # | ob  |
| 2882 | 18 | 7 | -0.950000 | -0.589092343 | 13.364590996  | -8.319917115  | 1 | 0 | 1 | # | oh  |
| 2883 | 18 | 4 | -1.050000 | -3.097968349 | 13.367626970  | -6.271017583  | 1 | 0 | 1 | # | ob  |
| 2884 | 18 | 7 | -0.950000 | -1.999257657 | 17.817259004  | -10.345082885 | 1 | 0 | 1 | # | oh  |
| 2885 | 18 | 4 | -1.050000 | -4.667081651 | 17.814223030  | -12.393982417 | 1 | 0 | 1 | # | ob  |
| 2886 | 18 | 7 | -0.950000 | -4.587607657 | 13.362709004  | -10.345082885 | 1 | 0 | 1 | # | oh  |
| 2887 | 18 | 4 | -1.050000 | -2.078731651 | 13.359673030  | -12.393982417 | 1 | 0 | 1 | # | ob  |
| 2888 | 18 | 4 | -1.050000 | -0.981894487 | 10.590000680  | -8.298868622  | 1 | 0 | 1 | # | ob  |
| 2889 | 18 | 4 | -1.050000 | -5.023189092 | 15.224039700  | -6.099420289  | 1 | 0 | 1 | # | ob  |
| 2890 | 18 | 4 | -1.050000 | -1.607035345 | 15.041151481  | -10.365922068 | 1 | 0 | 1 | # | ob  |
| 2891 | 18 | 4 | -1.050000 | -2.741532736 | 10.759646126  | -12.564346262 | 1 | 0 | 1 | # | ob  |
| 2892 | 18 | 8 | 2.100000  | -0.953702986 | 10.436219204  | -6.669722830  | 1 | 0 | 1 | # | st  |
| 2893 | 18 | 8 | 2.100000  | -1.634672226 | 14.882470782  | -11.994298097 | 1 | 0 | 1 | # | st  |
| 2894 | 18 | 8 | 2.100000  | -4.222997014 | 16.291080796  | -11.995277170 | 1 | 0 | 1 | # | st  |
| 2895 | 18 | 8 | 2.100000  | -1.634647014 | 11.836530796  | -11.995277170 | 1 | 0 | 1 | # | st  |
| 2896 | 18 | 8 | 2.100000  | -0.953677774 | 16.299379218  | -6.670701903  | 1 | 0 | 1 | # | st  |
| 2897 | 18 | 8 | 2.100000  | -3.542027774 | 11.844829218  | -6.670701903  | 1 | 0 | 1 | # | st  |
| 2898 | 18 | 8 | 2.100000  | -3.542052986 | 14.890769204  | -6.669722830  | 1 | 0 | 1 | # | st  |
| 2899 | 18 | 8 | 2.100000  | -4.223022226 | 10.427920782  | -11.994298097 | 1 | 0 | 1 | # | st  |
| 2900 | 18 | 1 | 1.575000  | -2.588144971 | 19.292861568  | -9.332229368  | 1 | 0 | 1 | # | ao  |
| 2901 | 18 | 1 | 1.575000  | -5.176494971 | 23.747411568  | -9.332229368  | 1 | 0 | 1 | # | ao  |
| 2902 | 18 | 1 | 1.575000  | -2.588555029 | 25.252638432  | -9.332770632  | 1 | 0 | 1 | # | ao  |
| 2903 | 18 | 1 | 1.575000  | -0.000205029 | 20.798088432  | -9.332770632  | 1 | 0 | 1 | # | ao  |
| 2904 | 18 | 2 | 0.425000  | -1.442049128 | 22.275467322  | -7.846384937  | 1 | 0 | 1 | # | ho  |
| 2905 | 18 | 2 | 0.425000  | -4.030399128 | 17.820917322  | -7.846384937  | 1 | 0 | 1 | # | ho  |
| 2906 | 18 | 2 | 0.425000  | -3.734650872 | 22.270032678  | -10.818615063 | 1 | 0 | 1 | # | ho  |
| 2907 | 18 | 2 | 0.425000  | -1.146300872 | 26.724582678  | -10.818615063 | 1 | 0 | 1 | # | ho  |
| 2908 | 18 | 4 | -1.050000 | -4.195385345 | 19.495701481  | -10.365922068 | 1 | 0 | 1 | # | ob  |
| 2909 | 18 | 4 | -1.050000 | -0.153182736 | 24.123296126  | -12.564346262 | 1 | 0 | 1 | # | ob  |
| 2910 | 18 | 4 | -1.050000 | -1.606455513 | 20.591849320  | -10.366131378 | 1 | 0 | 1 | # | ob  |
| 2911 | 18 | 4 | -1.050000 | -2.741860908 | 24.866910300  | -12.565579711 | 1 | 0 | 1 | # | ob  |
| 2912 | 18 | 4 | -1.050000 | -4.194805513 | 25.046399320  | -10.366131378 | 1 | 0 | 1 | # | ob  |
| 2913 | 18 | 4 | -1.050000 | -3.570244487 | 23.953650680  | -8.298868622  | 1 | 0 | 1 | # | ob  |
| 2914 | 18 | 4 | -1.050000 | -0.153510908 | 20.412360300  | -12.565579711 | 1 | 0 | 1 | # | ob  |
| 2915 | 18 | 4 | -1.050000 | -3.569664655 | 20.595248519  | -8.299077932  | 1 | 0 | 1 | # | ob  |
| 2916 | 18 | 4 | -1.050000 | -2.435167264 | 24.876753874  | -6.100653738  | 1 | 0 | 1 | # | ob  |
| 2917 | 18 | 4 | -1.050000 | -0.981314655 | 25.049798519  | -8.299077932  | 1 | 0 | 1 | # | ob  |
| 2918 | 18 | 4 | -1.050000 | -5.023517264 | 20.422203874  | -6.100653738  | 1 | 0 | 1 | # | ob  |
| 2919 | 18 | 4 | -1.050000 | -2.434839092 | 19.678589700  | -6.099420289  | 1 | 0 | 1 | # | ob  |
| 2920 | 18 | 7 | -0.950000 | -3.177442343 | 17.819140996  | -8.319917115  | 1 | 0 | 1 | # | oh  |
| 2921 | 18 | 4 | -1.050000 | -0.509618349 | 17.822176970  | -6.271017583  | 1 | 0 | 1 | # | ob  |
| 2922 | 18 | 7 | -0.950000 | -0.589092343 | 22.273690996  | -8.319917115  | 1 | 0 | 1 | # | oh  |
| 2923 | 18 | 4 | -1.050000 | -3.097968349 | 22.276726970  | -6.271017583  | 1 | 0 | 1 | # | ob  |
| 2924 | 18 | 7 | -0.950000 | -1.999257657 | 26.726359004  | -10.345082885 | 1 | 0 | 1 | # | oh  |
| 2925 | 18 | 4 | -1.050000 | -4.667081651 | 26.723323030  | -12.393982417 | 1 | 0 | 1 | # | ob  |
| 2926 | 18 | 7 | -0.950000 | -4.587607657 | 22.271809004  | -10.345082885 | 1 | 0 | 1 | # | oh  |
| 2927 | 18 | 4 | -1.050000 | -2.078731651 | 22.268773030  | -12.393982417 | 1 | 0 | 1 | # | ob  |
| 2928 | 18 | 4 | -1.050000 | -0.981894487 | 19.499100680  | -8.298868622  | 1 | 0 | 1 | # | ob  |
| 2929 | 18 | 4 | -1.050000 | -5.023189092 | 24.133139700  | -6.099420289  | 1 | 0 | 1 | # | ob  |
| 2930 | 18 | 4 | -1.050000 | -1.607035345 | 23.950251481  | -10.365922068 | 1 | 0 | 1 | # | ob  |
| 2931 | 18 | 4 | -1.050000 | -2.741532736 | 19.668746126  | -12.564346262 | 1 | 0 | 1 | # | ob  |
| 2932 | 18 | 8 | 2.100000  | -0.953702986 | 19.345319204  | -6.669722830  | 1 | 0 | 1 | # | st  |
| 2933 | 18 | 8 | 2.100000  | -1.634672226 | 23.791570782  | -11.994298097 | 1 | 0 | 1 | # | st  |
| 2934 | 18 | 8 | 2.100000  | -4.222997014 | 25.200180796  | -11.995277170 | 1 | 0 | 1 | # | st  |
| 2935 | 18 | 8 | 2.100000  | -1.634647014 | 20.745630796  | -11.995277170 | 1 | 0 | 1 | # | st  |
| 2936 | 18 | 8 | 2.100000  | -0.953677774 | 25.208479218  | -6.670701903  | 1 | 0 | 1 | # | st  |
| 2937 | 18 | 8 | 2.100000  | -3.542027774 | 20.753929218  | -6.670701903  | 1 | 0 | 1 | # | st  |
| 2938 | 18 | 8 | 2.100000  | -3.542052986 | 23.799869204  | -6.669722830  | 1 | 0 | 1 | # | st  |
| 2939 | 18 | 8 | 2.100000  | -4.223022226 | 19.337020782  | -11.994298097 | 1 | 0 | 1 | # | st  |
| 2940 | 18 | 1 | 1.575000  | -2.588144971 | -27.434438432 | -9.332229368  | 1 | 1 | 1 | # | ao  |
| 2941 | 18 | 1 | 1.575000  | -5.176494971 | -22.979888432 | -9.332229368  | 1 | 1 | 1 | # | ao  |
| 2942 | 18 | 1 | 1.575000  | -2.588555029 | -21.474661568 | -9.332770632  | 1 | 1 | 1 | # | ao  |
| 2943 | 18 | 1 | 1.575000  | -0.000205029 | -25.929211568 | -9.332770632  | 1 | 1 | 1 | # | ao  |
| 2944 | 18 | 2 | 0.425000  | -1.442049128 | -24.451832678 | -7.846384937  | 1 | 1 | 1 | # | ho  |
| 2945 | 18 | 2 | 0.425000  | -4.030399128 | 26.730017322  | -7.846384937  | 1 | 0 | 1 | # | ho  |
| 2946 | 18 | 2 | 0.425000  | -3.734650872 | -24.457267322 | -10.818615063 | 1 | 1 | 1 | # | ho  |
| 2947 | 18 | 3 | 0.425000  | -1.146300872 | -20.002717322 | -10.818615063 | 1 | 1 | 1 | # | do  |
| 2948 | 18 | 4 | -1.050000 | -4.195385345 | -27.231598519 | -10.365922068 | 1 | 1 | 1 | # | ob  |
| 2949 | 18 | 4 | -1.050000 | -0.153182736 | -22.604003874 | -12.564346262 | 1 | 1 | 1 | # | ob  |
| 2950 | 18 | 4 | -1.050000 | -1.606455513 | -26.135450680 | -10.366131378 | 1 | 1 | 1 | # | ob  |
| 2951 | 18 | 4 | -1.050000 | -2.741860908 | -21.860389700 | -12.565579711 | 1 | 1 | 1 | # | ob  |
| 2952 | 18 | 4 | -1.050000 | -4.194805513 | -21.680900680 | -10.366131378 | 1 | 1 | 1 | # | ob  |
| 2953 | 18 | 4 | -1.050000 | -3.570244487 | -22.773649320 | -8.298868622  | 1 | 1 | 1 | # | ob  |
| 2954 | 18 | 4 | -1.050000 | -0.153510908 | -26.314939700 | -12.565579711 | 1 | 1 | 1 | # | ob  |
| 2955 | 18 | 4 | -1.050000 | -3.569664655 | -26.132051481 | -8.299077932  | 1 | 1 | 1 | # | ob  |
| 2956 | 18 | 4 | -1.050000 | -2.435167264 | -21.850546126 | -6.100653738  | 1 | 1 | 1 | # | ob  |
| 2957 | 18 | 4 | -1.050000 | -0.981314655 | -21.677501481 | -8.299077932  | 1 | 1 | 1 | # | ob  |
| 2958 | 18 | 4 | -1.050000 | -5.023517264 | -26.305096126 | -6.100653738  | 1 | 1 | 1 | # | ob  |
| 2959 | 18 | 4 | -1.050000 | -2.434839092 | -27.048710300 | -6.099420289  | 1 | 1 | 1 | # | ob  |
| 2960 | 18 | 7 | -0.950000 | -3.177442343 | 26.728240996  | -8.319917115  | 1 | 0 | 1 | # | oh  |
| 2961 | 18 | 4 | -1.050000 | -0.509618349 | 26.731276970  | -6.271017583  | 1 | 0 | 1 | # | ob  |
| 2962 | 18 | 7 | -0.950000 | -0.589092343 | -24.453609004 | -8.319917115  | 1 | 1 | 1 | # | oh  |
| 2963 | 18 | 4 | -1.050000 | -3.097968349 | -24.450573030 | -6.271017583  | 1 | 1 | 1 | # | ob  |
| 2964 | 18 | 5 | -0.950000 | -1.999257657 | -20.000940996 | -10.345082885 | 1 | 1 | 1 | # | oho |
| 2965 | 18 | 6 | -0.950000 | -4.667081651 | -20.003976970 | -12.393982417 | 1 | 1 | 1 | # | oht |
| 2966 | 18 | 7 | -0.950000 | -4.587607657 | -24.455490996 | -10.345082885 | 1 | 1 | 1 | # | oh  |
| 2967 | 18 | 4 | -1.050000 | -2.078731651 | -24.458526970 | -12.393982417 | 1 | 1 | 1 | # | ob  |
| 2968 | 18 | 4 | -1.050000 | -0.981894487 | -27.228199320 | -8.298868622  | 1 | 1 | 1 | # | ob  |

|      |    |   |           |              |               |               |   |   |   |   |     |
|------|----|---|-----------|--------------|---------------|---------------|---|---|---|---|-----|
| 2969 | 18 | 4 | -1.050000 | -5.023189092 | -22.594160300 | -6.099420289  | 1 | 1 | 1 | # | ob  |
| 2970 | 18 | 4 | -1.050000 | -1.607035345 | -22.777048519 | -10.365922068 | 1 | 1 | 1 | # | ob  |
| 2971 | 18 | 4 | -1.050000 | -2.741532736 | -27.058553874 | -12.564346262 | 1 | 1 | 1 | # | ob  |
| 2972 | 18 | 8 | 2.100000  | -0.953702986 | -27.381980796 | -6.669722830  | 1 | 1 | 1 | # | st  |
| 2973 | 18 | 8 | 2.100000  | -1.634672226 | -22.935729218 | -11.994298097 | 1 | 1 | 1 | # | st  |
| 2974 | 18 | 8 | 2.100000  | -4.222997014 | -21.527119204 | -11.995277170 | 1 | 1 | 1 | # | st  |
| 2975 | 18 | 8 | 2.100000  | -1.634647014 | -25.981669204 | -11.995277170 | 1 | 1 | 1 | # | st  |
| 2976 | 18 | 8 | 2.100000  | -0.953677774 | -21.518820782 | -6.670701903  | 1 | 1 | 1 | # | st  |
| 2977 | 18 | 8 | 2.100000  | -3.542027774 | -25.973370782 | -6.670701903  | 1 | 1 | 1 | # | st  |
| 2978 | 18 | 8 | 2.100000  | -3.542052986 | -22.927430796 | -6.669722830  | 1 | 1 | 1 | # | st  |
| 2979 | 18 | 8 | 2.100000  | -4.223022226 | -27.390279218 | -11.994298097 | 1 | 1 | 1 | # | st  |
| 2980 | 18 | 6 | -0.950000 | -0.439233573 | -19.680858114 | 2.588720950   | 1 | 1 | 1 | # | oht |
| 2981 | 18 | 6 | -0.950000 | -4.871761797 | -0.272172439  | -2.801727113  | 1 | 0 | 1 | # | oht |
| 2982 | 18 | 3 | 0.425000  | -5.220127747 | -1.308055357  | -2.995860493  | 1 | 0 | 1 | # | do  |
| 2983 | 18 | 3 | 0.425000  | -0.176711381 | -1.054326608  | 3.097070537   | 1 | 0 | 1 | # | do  |
| 2984 | 18 | 3 | 0.425000  | -0.312851036 | -18.596754758 | 2.386613544   | 1 | 1 | 1 | # | do  |
| 2985 | 18 | 3 | 0.425000  | -5.063651085 | -19.012312375 | -3.363863051  | 1 | 1 | 1 | # | do  |
| 2986 | 19 | 1 | 1.575000  | 2.588555029  | 1.474661568   | 0.000270632   | 0 | 0 | 1 | # | ao  |
| 2987 | 19 | 1 | 1.575000  | 0.000205029  | 5.929211568   | 0.000270632   | 0 | 0 | 1 | # | ao  |
| 2988 | 19 | 1 | 1.575000  | 2.588144971  | 7.434438432   | -0.000270632  | 0 | 0 | 1 | # | ao  |
| 2989 | 19 | 1 | 1.575000  | 5.176494971  | 2.979888432   | -0.000270632  | 0 | 0 | 1 | # | ao  |
| 2990 | 19 | 2 | 0.425000  | 3.734650872  | 4.457267322   | 1.486115063   | 0 | 0 | 1 | # | ho  |
| 2991 | 19 | 3 | 0.425000  | 1.146300872  | 0.002717322   | 1.486115063   | 0 | 0 | 1 | # | do  |
| 2992 | 19 | 2 | 0.425000  | 1.442049128  | 4.451832678   | -1.486115063  | 0 | 0 | 1 | # | ho  |
| 2993 | 19 | 2 | 0.425000  | 4.030399128  | 8.906382678   | -1.486115063  | 0 | 0 | 1 | # | ho  |
| 2994 | 19 | 4 | -1.050000 | 0.981314655  | 1.677501481   | -1.033422068  | 0 | 0 | 1 | # | ob  |
| 2995 | 19 | 4 | -1.050000 | 5.023517264  | 6.305096126   | -3.231846262  | 0 | 0 | 1 | # | ob  |
| 2996 | 19 | 4 | -1.050000 | 3.570244487  | 2.773649320   | -1.033631378  | 0 | 0 | 1 | # | ob  |
| 2997 | 19 | 4 | -1.050000 | 2.434839092  | 7.048710300   | -3.233079711  | 0 | 0 | 1 | # | ob  |
| 2998 | 19 | 4 | -1.050000 | 0.981894487  | 7.228199320   | -1.033631378  | 0 | 0 | 1 | # | ob  |
| 2999 | 19 | 4 | -1.050000 | 1.606455513  | 6.135450680   | 1.033631378   | 0 | 0 | 1 | # | ob  |
| 3000 | 19 | 4 | -1.050000 | 5.023189092  | 2.594160300   | -3.233079711  | 0 | 0 | 1 | # | ob  |
| 3001 | 19 | 4 | -1.050000 | 1.607035345  | 2.777048519   | 1.033422068   | 0 | 0 | 1 | # | ob  |
| 3002 | 19 | 4 | -1.050000 | 2.741532736  | 7.058553874   | 3.231846262   | 0 | 0 | 1 | # | ob  |
| 3003 | 19 | 4 | -1.050000 | 4.195385345  | 7.231598519   | 1.033422068   | 0 | 0 | 1 | # | ob  |
| 3004 | 19 | 4 | -1.050000 | 0.153182736  | 2.604003874   | 3.231846262   | 0 | 0 | 1 | # | ob  |
| 3005 | 19 | 4 | -1.050000 | 2.741860908  | 1.860389700   | 3.233079711   | 0 | 0 | 1 | # | ob  |
| 3006 | 19 | 5 | -0.950000 | 1.999257657  | 0.000940996   | 1.012582885   | 0 | 0 | 1 | # | oho |
| 3007 | 19 | 6 | -0.950000 | 4.667081651  | 0.003976970   | 3.061482417   | 0 | 0 | 1 | # | oht |
| 3008 | 19 | 7 | -0.950000 | 4.587607657  | 4.455490996   | 1.012582885   | 0 | 0 | 1 | # | oh  |
| 3009 | 19 | 4 | -1.050000 | 2.078731651  | 4.458526970   | 3.061482417   | 0 | 0 | 1 | # | ob  |
| 3010 | 19 | 7 | -0.950000 | 3.177442343  | 8.908159004   | -1.012582885  | 0 | 0 | 1 | # | oh  |
| 3011 | 19 | 4 | -1.050000 | 0.509618349  | 8.905123030   | -3.061482417  | 0 | 0 | 1 | # | ob  |
| 3012 | 19 | 7 | -0.950000 | 0.589092343  | 4.453609004   | -1.012582885  | 0 | 0 | 1 | # | oh  |
| 3013 | 19 | 4 | -1.050000 | 3.097968349  | 4.450573030   | -3.061482417  | 0 | 0 | 1 | # | ob  |
| 3014 | 19 | 4 | -1.050000 | 4.194805513  | 1.680900680   | 1.033631378   | 0 | 0 | 1 | # | ob  |
| 3015 | 19 | 4 | -1.050000 | 0.153510908  | 6.314939700   | 3.233079711   | 0 | 0 | 1 | # | ob  |
| 3016 | 19 | 4 | -1.050000 | 3.569664655  | 6.132051481   | -1.033422068  | 0 | 0 | 1 | # | ob  |
| 3017 | 19 | 4 | -1.050000 | 2.435167264  | 1.850546126   | -3.231846262  | 0 | 0 | 1 | # | ob  |
| 3018 | 19 | 8 | 2.100000  | 4.222997014  | 1.527119204   | 2.662777170   | 0 | 0 | 1 | # | st  |
| 3019 | 19 | 8 | 2.100000  | 3.542027774  | 5.973370782   | -2.661798097  | 0 | 0 | 1 | # | st  |
| 3020 | 19 | 8 | 2.100000  | 0.953702986  | 7.381980796   | -2.662777170  | 0 | 0 | 1 | # | st  |
| 3021 | 19 | 8 | 2.100000  | 3.542052986  | 2.927430796   | -2.662777170  | 0 | 0 | 1 | # | st  |
| 3022 | 19 | 8 | 2.100000  | 4.223022226  | 7.390279218   | 2.661798097   | 0 | 0 | 1 | # | st  |
| 3023 | 19 | 8 | 2.100000  | 1.634672226  | 2.935729218   | 2.661798097   | 0 | 0 | 1 | # | st  |
| 3024 | 19 | 8 | 2.100000  | 1.634647014  | 5.981669204   | 2.662777170   | 0 | 0 | 1 | # | st  |
| 3025 | 19 | 8 | 2.100000  | 0.953677774  | 1.518820782   | -2.661798097  | 0 | 0 | 1 | # | st  |
| 3026 | 19 | 1 | 1.575000  | 2.588555029  | 10.383761568  | 0.000270632   | 0 | 0 | 1 | # | ao  |
| 3027 | 19 | 1 | 1.575000  | 0.000205029  | 14.838311568  | 0.000270632   | 0 | 0 | 1 | # | ao  |
| 3028 | 19 | 1 | 1.575000  | 2.588144971  | 16.343538432  | -0.000270632  | 0 | 0 | 1 | # | ao  |
| 3029 | 19 | 1 | 1.575000  | 5.176494971  | 11.888988432  | -0.000270632  | 0 | 0 | 1 | # | ao  |
| 3030 | 19 | 2 | 0.425000  | 3.734650872  | 13.366367322  | 1.486115063   | 0 | 0 | 1 | # | ho  |
| 3031 | 19 | 2 | 0.425000  | 1.146300872  | 8.911817322   | 1.486115063   | 0 | 0 | 1 | # | ho  |
| 3032 | 19 | 2 | 0.425000  | 1.442049128  | 13.360932678  | -1.486115063  | 0 | 0 | 1 | # | ho  |
| 3033 | 19 | 2 | 0.425000  | 4.030399128  | 17.815482678  | -1.486115063  | 0 | 0 | 1 | # | ho  |
| 3034 | 19 | 4 | -1.050000 | 0.981314655  | 10.586601481  | -1.033422068  | 0 | 0 | 1 | # | ob  |
| 3035 | 19 | 4 | -1.050000 | 5.023517264  | 15.214196126  | -3.231846262  | 0 | 0 | 1 | # | ob  |
| 3036 | 19 | 4 | -1.050000 | 3.570244487  | 11.682749320  | -1.033631378  | 0 | 0 | 1 | # | ob  |
| 3037 | 19 | 4 | -1.050000 | 2.434839092  | 15.957810300  | -3.233079711  | 0 | 0 | 1 | # | ob  |
| 3038 | 19 | 4 | -1.050000 | 0.981894487  | 16.137299320  | -1.033631378  | 0 | 0 | 1 | # | ob  |
| 3039 | 19 | 4 | -1.050000 | 1.606455513  | 15.044550680  | 1.033631378   | 0 | 0 | 1 | # | ob  |
| 3040 | 19 | 4 | -1.050000 | 5.023189092  | 11.503260300  | -3.233079711  | 0 | 0 | 1 | # | ob  |
| 3041 | 19 | 4 | -1.050000 | 1.607035345  | 11.686148519  | 1.033422068   | 0 | 0 | 1 | # | ob  |
| 3042 | 19 | 4 | -1.050000 | 2.741532736  | 15.967653874  | 3.231846262   | 0 | 0 | 1 | # | ob  |
| 3043 | 19 | 4 | -1.050000 | 4.195385345  | 16.140698519  | 1.033422068   | 0 | 0 | 1 | # | ob  |
| 3044 | 19 | 4 | -1.050000 | 0.153182736  | 11.513103874  | 3.231846262   | 0 | 0 | 1 | # | ob  |
| 3045 | 19 | 4 | -1.050000 | 2.741860908  | 10.769489700  | 3.233079711   | 0 | 0 | 1 | # | ob  |
| 3046 | 19 | 7 | -0.950000 | 1.999257657  | 8.910040996   | 1.012582885   | 0 | 0 | 1 | # | oho |
| 3047 | 19 | 6 | -0.950000 | 4.667081651  | 8.913076970   | 3.061482417   | 0 | 0 | 1 | # | ob  |
| 3048 | 19 | 7 | -0.950000 | 4.587607657  | 13.364590996  | 1.012582885   | 0 | 0 | 1 | # | oh  |
| 3049 | 19 | 4 | -1.050000 | 2.078731651  | 13.367626970  | 3.061482417   | 0 | 0 | 1 | # | ob  |
| 3050 | 19 | 7 | -0.950000 | 3.177442343  | 17.817259004  | -1.012582885  | 0 | 0 | 1 | # | oh  |
| 3051 | 19 | 4 | -1.050000 | 0.509618349  | 17.814223030  | -3.061482417  | 0 | 0 | 1 | # | ob  |
| 3052 | 19 | 7 | -0.950000 | 0.589092343  | 13.362709004  | -1.012582885  | 0 | 0 | 1 | # | oh  |
| 3053 | 19 | 4 | -1.050000 | 3.097968349  | 13.359673030  | -3.061482417  | 0 | 0 | 1 | # | ob  |
| 3054 | 19 | 4 | -1.050000 | 4.194805513  | 10.590000680  | 1.033631378   | 0 | 0 | 1 | # | ob  |
| 3055 | 19 | 4 | -1.050000 | 0.153510908  | 15.224039700  | 3.233079711   | 0 | 0 | 1 | # | ob  |
| 3056 | 19 | 4 | -1.050000 | 3.569664655  | 15.041151481  | -1.033422068  | 0 | 0 | 1 | # | ob  |
| 3057 | 19 | 4 | -1.050000 | 2.435167264  | 10.759646126  | -3.231846262  | 0 | 0 | 1 | # | ob  |
| 3058 | 19 | 8 | 2.100000  | 4.222997014  | 10.436219204  | 2.662777170   | 0 | 0 | 1 | # | st  |
| 3059 | 19 | 8 | 2.100000  | 3.542027774  | 14.882470782  | -2.661798097  | 0 | 0 | 1 | # | st  |
| 3060 | 19 | 8 | 2.100000  | 0.953702986  | 16.291080796  | -2.662777170  | 0 | 0 | 1 | # | st  |
| 3061 | 19 | 8 | 2.100000  | 3.542052986  | 11.836530796  | -2.662777170  | 0 | 0 | 1 | # | st  |

|      |    |   |           |              |               |              |   |   |   |   |    |
|------|----|---|-----------|--------------|---------------|--------------|---|---|---|---|----|
| 3062 | 19 | 8 | 2.100000  | 4.223022226  | 16.299379218  | 2.661798097  | 0 | 0 | 1 | # | st |
| 3063 | 19 | 8 | 2.100000  | 1.634672226  | 11.844829218  | 2.661798097  | 0 | 0 | 1 | # | st |
| 3064 | 19 | 8 | 2.100000  | 1.634647014  | 14.890769204  | 2.662777170  | 0 | 0 | 1 | # | st |
| 3065 | 19 | 8 | 2.100000  | 0.953677774  | 10.427920782  | -2.661798097 | 0 | 0 | 1 | # | st |
| 3066 | 19 | 1 | 1.575000  | 2.588555029  | 19.292861568  | 0.000270632  | 0 | 0 | 1 | # | ao |
| 3067 | 19 | 1 | 1.575000  | 0.000205029  | 23.747411568  | 0.000270632  | 0 | 0 | 1 | # | ao |
| 3068 | 19 | 1 | 1.575000  | 2.588144971  | 25.252638432  | -0.000270632 | 0 | 0 | 1 | # | ao |
| 3069 | 19 | 1 | 1.575000  | 5.176494971  | 20.798088432  | -0.000270632 | 0 | 0 | 1 | # | ao |
| 3070 | 19 | 2 | 0.425000  | 3.734650872  | 22.275467322  | 1.486115063  | 0 | 0 | 1 | # | ho |
| 3071 | 19 | 2 | 0.425000  | 1.146300872  | 17.820917322  | 1.486115063  | 0 | 0 | 1 | # | ho |
| 3072 | 19 | 2 | 0.425000  | 1.442049128  | 22.270032678  | -1.486115063 | 0 | 0 | 1 | # | ho |
| 3073 | 19 | 2 | 0.425000  | 4.030399128  | 26.724582678  | -1.486115063 | 0 | 0 | 1 | # | ho |
| 3074 | 19 | 4 | -1.050000 | 0.981314655  | 19.495701481  | -1.033422068 | 0 | 0 | 1 | # | ob |
| 3075 | 19 | 4 | -1.050000 | 5.023517264  | 24.123296126  | -3.231846262 | 0 | 0 | 1 | # | ob |
| 3076 | 19 | 4 | -1.050000 | 3.570244487  | 20.591849320  | -1.033631378 | 0 | 0 | 1 | # | ob |
| 3077 | 19 | 4 | -1.050000 | 2.434839092  | 24.866910300  | -3.233079711 | 0 | 0 | 1 | # | ob |
| 3078 | 19 | 4 | -1.050000 | 0.981894487  | 25.046399320  | -1.033631378 | 0 | 0 | 1 | # | ob |
| 3079 | 19 | 4 | -1.050000 | 1.606455513  | 23.953650680  | 1.033631378  | 0 | 0 | 1 | # | ob |
| 3080 | 19 | 4 | -1.050000 | 5.023189092  | 20.412360300  | -3.233079711 | 0 | 0 | 1 | # | ob |
| 3081 | 19 | 4 | -1.050000 | 1.607035345  | 20.595248519  | 1.033422068  | 0 | 0 | 1 | # | ob |
| 3082 | 19 | 4 | -1.050000 | 2.741532736  | 24.876753874  | 3.231846262  | 0 | 0 | 1 | # | ob |
| 3083 | 19 | 4 | -1.050000 | 4.195385345  | 25.049798519  | 1.033422068  | 0 | 0 | 1 | # | ob |
| 3084 | 19 | 4 | -1.050000 | 0.153182736  | 20.422203874  | 3.231846262  | 0 | 0 | 1 | # | ob |
| 3085 | 19 | 4 | -1.050000 | 2.741860908  | 19.678589700  | 3.233079711  | 0 | 0 | 1 | # | ob |
| 3086 | 19 | 7 | -0.950000 | 1.999257657  | 17.819140996  | 1.012582885  | 0 | 0 | 1 | # | oh |
| 3087 | 19 | 4 | -1.050000 | 4.667081651  | 17.822176970  | 3.061482417  | 0 | 0 | 1 | # | ob |
| 3088 | 19 | 7 | -0.950000 | 4.587607657  | 22.273690996  | 1.012582885  | 0 | 0 | 1 | # | oh |
| 3089 | 19 | 4 | -1.050000 | 2.078731651  | 22.276726970  | 3.061482417  | 0 | 0 | 1 | # | ob |
| 3090 | 19 | 7 | -0.950000 | 3.177442343  | 26.726359004  | -1.012582885 | 0 | 0 | 1 | # | oh |
| 3091 | 19 | 4 | -1.050000 | 0.509618349  | 26.723323030  | -3.061482417 | 0 | 0 | 1 | # | ob |
| 3092 | 19 | 7 | -0.950000 | 0.589092343  | 22.271809004  | -1.012582885 | 0 | 0 | 1 | # | oh |
| 3093 | 19 | 4 | -1.050000 | 3.097968349  | 22.268773030  | -3.061482417 | 0 | 0 | 1 | # | ob |
| 3094 | 19 | 4 | -1.050000 | 4.194805513  | 19.499100680  | 1.033631378  | 0 | 0 | 1 | # | ob |
| 3095 | 19 | 4 | -1.050000 | 0.153510908  | 24.133139700  | 3.233079711  | 0 | 0 | 1 | # | ob |
| 3096 | 19 | 4 | -1.050000 | 3.569664655  | 23.950251481  | -1.033422068 | 0 | 0 | 1 | # | ob |
| 3097 | 19 | 4 | -1.050000 | 2.435167264  | 19.668746126  | -3.231846262 | 0 | 0 | 1 | # | ob |
| 3098 | 19 | 8 | 2.100000  | 4.222997014  | 19.345319204  | 2.662777170  | 0 | 0 | 1 | # | st |
| 3099 | 19 | 8 | 2.100000  | 3.542027774  | 23.791570782  | -2.661798097 | 0 | 0 | 1 | # | st |
| 3100 | 19 | 8 | 2.100000  | 0.953702986  | 25.200180796  | -2.662777170 | 0 | 0 | 1 | # | st |
| 3101 | 19 | 8 | 2.100000  | 3.542052986  | 20.745630796  | -2.662777170 | 0 | 0 | 1 | # | st |
| 3102 | 19 | 8 | 2.100000  | 4.223022226  | 25.208479218  | 2.661798097  | 0 | 0 | 1 | # | st |
| 3103 | 19 | 8 | 2.100000  | 1.634672226  | 20.753929218  | 2.661798097  | 0 | 0 | 1 | # | st |
| 3104 | 19 | 8 | 2.100000  | 1.634647014  | 23.799869204  | 2.662777170  | 0 | 0 | 1 | # | st |
| 3105 | 19 | 8 | 2.100000  | 0.953677774  | 19.337020782  | -2.661798097 | 0 | 0 | 1 | # | st |
| 3106 | 19 | 1 | 1.575000  | 2.588555029  | -27.434438432 | 0.000270632  | 0 | 1 | 1 | # | ao |
| 3107 | 19 | 1 | 1.575000  | 0.000205029  | -22.979888432 | 0.000270632  | 0 | 1 | 1 | # | ao |
| 3108 | 19 | 1 | 1.575000  | 2.588144971  | -21.474661568 | -0.000270632 | 0 | 1 | 1 | # | ao |
| 3109 | 19 | 1 | 1.575000  | 5.176494971  | -25.929211568 | -0.000270632 | 0 | 1 | 1 | # | ao |
| 3110 | 19 | 2 | 0.425000  | 3.734650872  | -24.451832678 | 1.486115063  | 0 | 1 | 1 | # | ho |
| 3111 | 19 | 2 | 0.425000  | 1.146300872  | 26.730017322  | 1.486115063  | 0 | 0 | 1 | # | ho |
| 3112 | 19 | 2 | 0.425000  | 1.442049128  | -24.457267322 | -1.486115063 | 0 | 1 | 1 | # | ho |
| 3113 | 19 | 3 | 0.425000  | 4.030399128  | -20.002717322 | -1.486115063 | 0 | 1 | 1 | # | do |
| 3114 | 19 | 4 | -1.050000 | 0.981314655  | -27.231598519 | -1.033422068 | 0 | 1 | 1 | # | ob |
| 3115 | 19 | 4 | -1.050000 | 5.023517264  | -22.604003874 | -3.231846262 | 0 | 1 | 1 | # | ob |
| 3116 | 19 | 4 | -1.050000 | 3.570244487  | -26.135450680 | -1.033631378 | 0 | 1 | 1 | # | ob |
| 3117 | 19 | 4 | -1.050000 | 2.434839092  | -21.860389700 | -3.233079711 | 0 | 1 | 1 | # | ob |
| 3118 | 19 | 4 | -1.050000 | 0.981894487  | -21.680900680 | -1.033631378 | 0 | 1 | 1 | # | ob |
| 3119 | 19 | 4 | -1.050000 | 1.606455513  | -22.773649320 | 1.033631378  | 0 | 1 | 1 | # | ob |
| 3120 | 19 | 4 | -1.050000 | 5.023189092  | -26.314939700 | -3.233079711 | 0 | 1 | 1 | # | ob |
| 3121 | 19 | 4 | -1.050000 | 1.607035345  | -26.132051481 | 1.033422068  | 0 | 1 | 1 | # | ob |
| 3122 | 19 | 4 | -1.050000 | 2.741532736  | -21.850546126 | 3.231846262  | 0 | 1 | 1 | # | ob |
| 3123 | 19 | 4 | -1.050000 | 4.195385345  | -21.677501481 | 1.033422068  | 0 | 1 | 1 | # | ob |
| 3124 | 19 | 4 | -1.050000 | 0.153182736  | -26.305096126 | 3.231846262  | 0 | 1 | 1 | # | ob |
| 3125 | 19 | 4 | -1.050000 | 2.741860908  | -27.048710300 | 3.233079711  | 0 | 1 | 1 | # | ob |
| 3126 | 19 | 7 | -0.950000 | 1.999257657  | 26.728240996  | 1.012582885  | 0 | 0 | 1 | # | oh |
| 3127 | 19 | 4 | -1.050000 | 4.667081651  | 26.731276970  | 3.061482417  | 0 | 0 | 1 | # | ob |
| 3128 | 19 | 7 | -0.950000 | 4.587607657  | -24.453609004 | 1.012582885  | 0 | 1 | 1 | # | oh |
| 3129 | 19 | 4 | -1.050000 | 2.078731651  | -24.450573030 | 3.061482417  | 0 | 1 | 1 | # | ob |
| 3130 | 19 | 5 | -0.950000 | 3.177442343  | -20.000940996 | -1.012582885 | 0 | 1 | 1 | # | oh |
| 3131 | 19 | 6 | -0.950000 | 0.509618349  | -20.003976970 | -3.061482417 | 0 | 1 | 1 | # | oh |
| 3132 | 19 | 7 | -0.950000 | 0.589092343  | -24.455490996 | -1.012582885 | 0 | 1 | 1 | # | oh |
| 3133 | 19 | 4 | -1.050000 | 3.097968349  | -24.458526970 | -3.061482417 | 0 | 1 | 1 | # | ob |
| 3134 | 19 | 4 | -1.050000 | 4.194805513  | -27.228199320 | 1.033631378  | 0 | 1 | 1 | # | ob |
| 3135 | 19 | 4 | -1.050000 | 0.153510908  | -22.594160300 | 3.233079711  | 0 | 1 | 1 | # | ob |
| 3136 | 19 | 4 | -1.050000 | 3.569664655  | -22.777048519 | -1.033422068 | 0 | 1 | 1 | # | ob |
| 3137 | 19 | 4 | -1.050000 | 2.435167264  | -27.058553874 | -3.231846262 | 0 | 1 | 1 | # | ob |
| 3138 | 19 | 8 | 2.100000  | 4.222997014  | -27.381980796 | 2.662777170  | 0 | 1 | 1 | # | st |
| 3139 | 19 | 8 | 2.100000  | 3.542027774  | -22.935729218 | -2.661798097 | 0 | 1 | 1 | # | st |
| 3140 | 19 | 8 | 2.100000  | 0.953702986  | -21.527119204 | -2.662777170 | 0 | 1 | 1 | # | st |
| 3141 | 19 | 8 | 2.100000  | 3.542052986  | -25.981669204 | -2.662777170 | 0 | 1 | 1 | # | st |
| 3142 | 19 | 8 | 2.100000  | 4.223022226  | -21.518820782 | 2.661798097  | 0 | 1 | 1 | # | st |
| 3143 | 19 | 8 | 2.100000  | 1.634672226  | -25.973370782 | 2.661798097  | 0 | 1 | 1 | # | st |
| 3144 | 19 | 8 | 2.100000  | 1.634647014  | -22.927430796 | 2.662777170  | 0 | 1 | 1 | # | st |
| 3145 | 19 | 8 | 2.100000  | 0.953677774  | -27.390279218 | -2.661798097 | 0 | 1 | 1 | # | st |
| 3146 | 20 | 1 | 1.575000  | 7.765255029  | 1.474661568   | 0.000270632  | 0 | 0 | 1 | # | ao |
| 3147 | 20 | 1 | 1.575000  | 5.176905029  | 5.929211568   | 0.000270632  | 0 | 0 | 1 | # | ao |
| 3148 | 20 | 1 | 1.575000  | 7.764844971  | 7.434438432   | -0.000270632 | 0 | 0 | 1 | # | ao |
| 3149 | 20 | 1 | 1.575000  | 10.353194971 | 2.979888432   | -0.000270632 | 0 | 0 | 1 | # | ao |
| 3150 | 20 | 2 | 0.425000  | 8.911350872  | 4.457267322   | 1.486115063  | 0 | 0 | 1 | # | ho |
| 3151 | 20 | 3 | 0.425000  | 6.323000872  | 0.002717322   | 1.486115063  | 0 | 0 | 1 | # | do |
| 3152 | 20 | 2 | 0.425000  | 6.618749128  | 4.451832678   | -1.486115063 | 0 | 0 | 1 | # | ho |
| 3153 | 20 | 2 | 0.425000  | 9.207099128  | 8.906382678   | -1.486115063 | 0 | 0 | 1 | # | ho |
| 3154 | 20 | 4 | -1.050000 | 6.158014655  | 1.677501481   | -1.033422068 | 0 | 0 | 1 | # | ob |

|      |    |   |           |              |              |              |   |   |   |   |    |
|------|----|---|-----------|--------------|--------------|--------------|---|---|---|---|----|
| 3155 | 20 | 4 | -1.050000 | 10.200217264 | 6.305096126  | -3.231846262 | 0 | 0 | 1 | # | ob |
| 3156 | 20 | 4 | -1.050000 | 8.746944487  | 2.773649320  | -1.033631378 | 0 | 0 | 1 | # | ob |
| 3157 | 20 | 4 | -1.050000 | 7.611539092  | 7.048710300  | -3.233079711 | 0 | 0 | 1 | # | ob |
| 3158 | 20 | 4 | -1.050000 | 6.158594487  | 7.228199320  | -1.033631378 | 0 | 0 | 1 | # | ob |
| 3159 | 20 | 4 | -1.050000 | 6.783155513  | 6.135450680  | 1.033631378  | 0 | 0 | 1 | # | ob |
| 3160 | 20 | 4 | -1.050000 | 10.199889092 | 2.594160300  | -3.233079711 | 0 | 0 | 1 | # | ob |
| 3161 | 20 | 4 | -1.050000 | 6.783735345  | 2.777048519  | 1.033422068  | 0 | 0 | 1 | # | ob |
| 3162 | 20 | 4 | -1.050000 | 7.918232736  | 7.058553874  | 3.231846262  | 0 | 0 | 1 | # | ob |
| 3163 | 20 | 4 | -1.050000 | 9.372085345  | 7.231598519  | 1.033422068  | 0 | 0 | 1 | # | ob |
| 3164 | 20 | 4 | -1.050000 | 5.329882736  | 2.604003874  | 3.231846262  | 0 | 0 | 1 | # | ob |
| 3165 | 20 | 4 | -1.050000 | 7.918560908  | 1.860389700  | 3.233079711  | 0 | 0 | 1 | # | ob |
| 3166 | 20 | 5 | -0.950000 | 7.175957657  | 0.000940996  | 1.012582885  | 0 | 0 | 1 | # | oh |
| 3167 | 20 | 6 | -0.950000 | 9.843781651  | 0.003976970  | 3.061482417  | 0 | 0 | 1 | # | oh |
| 3168 | 20 | 7 | -0.950000 | 9.764307657  | 4.455490996  | 1.012582885  | 0 | 0 | 1 | # | oh |
| 3169 | 20 | 4 | -1.050000 | 7.255431651  | 4.458526970  | 3.061482417  | 0 | 0 | 1 | # | ob |
| 3170 | 20 | 7 | -0.950000 | 8.354142343  | 8.908159004  | -1.012582885 | 0 | 0 | 1 | # | oh |
| 3171 | 20 | 4 | -1.050000 | 5.686318349  | 8.905123030  | -3.061482417 | 0 | 0 | 1 | # | ob |
| 3172 | 20 | 7 | -0.950000 | 5.765792343  | 4.453609004  | -1.012582885 | 0 | 0 | 1 | # | oh |
| 3173 | 20 | 4 | -1.050000 | 8.274668349  | 4.450573030  | -3.061482417 | 0 | 0 | 1 | # | ob |
| 3174 | 20 | 4 | -1.050000 | 9.371505513  | 1.680900680  | 1.033631378  | 0 | 0 | 1 | # | ob |
| 3175 | 20 | 4 | -1.050000 | 5.330210908  | 6.314939700  | 3.233079711  | 0 | 0 | 1 | # | ob |
| 3176 | 20 | 4 | -1.050000 | 8.746364655  | 6.132051481  | -1.033422068 | 0 | 0 | 1 | # | ob |
| 3177 | 20 | 4 | -1.050000 | 7.611867264  | 1.850546126  | -3.231846262 | 0 | 0 | 1 | # | ob |
| 3178 | 20 | 8 | 2.100000  | 9.399697014  | 1.527119204  | 2.662777170  | 0 | 0 | 1 | # | st |
| 3179 | 20 | 8 | 2.100000  | 8.718727774  | 5.973370782  | -2.661798097 | 0 | 0 | 1 | # | st |
| 3180 | 20 | 8 | 2.100000  | 6.130402986  | 7.381980796  | -2.662777170 | 0 | 0 | 1 | # | st |
| 3181 | 20 | 8 | 2.100000  | 8.718752986  | 2.927430796  | -2.662777170 | 0 | 0 | 1 | # | st |
| 3182 | 20 | 8 | 2.100000  | 9.399722226  | 7.390279218  | 2.661798097  | 0 | 0 | 1 | # | st |
| 3183 | 20 | 8 | 2.100000  | 6.811372226  | 2.935729218  | 2.661798097  | 0 | 0 | 1 | # | st |
| 3184 | 20 | 8 | 2.100000  | 6.811347014  | 5.981669204  | 2.662777170  | 0 | 0 | 1 | # | st |
| 3185 | 20 | 8 | 2.100000  | 6.130377774  | 1.518820782  | -2.661798097 | 0 | 0 | 1 | # | st |
| 3186 | 20 | 1 | 1.575000  | 7.765255029  | 10.383761568 | 0.000270632  | 0 | 0 | 1 | # | ao |
| 3187 | 20 | 1 | 1.575000  | 5.176905029  | 14.838311568 | 0.000270632  | 0 | 0 | 1 | # | ao |
| 3188 | 20 | 1 | 1.575000  | 7.764844971  | 16.343538432 | -0.000270632 | 0 | 0 | 1 | # | ao |
| 3189 | 20 | 1 | 1.575000  | 10.353194971 | 11.888988432 | -0.000270632 | 0 | 0 | 1 | # | ao |
| 3190 | 20 | 2 | 0.425000  | 8.911350872  | 13.366367322 | 1.486115063  | 0 | 0 | 1 | # | ho |
| 3191 | 20 | 2 | 0.425000  | 6.323000872  | 8.911817322  | 1.486115063  | 0 | 0 | 1 | # | ho |
| 3192 | 20 | 2 | 0.425000  | 6.618749128  | 13.360932678 | -1.486115063 | 0 | 0 | 1 | # | ho |
| 3193 | 20 | 2 | 0.425000  | 9.207099128  | 17.815482678 | -1.486115063 | 0 | 0 | 1 | # | ho |
| 3194 | 20 | 4 | -1.050000 | 6.158014655  | 10.586601481 | -1.033422068 | 0 | 0 | 1 | # | ob |
| 3195 | 20 | 4 | -1.050000 | 10.200217264 | 15.214196126 | -3.231846262 | 0 | 0 | 1 | # | ob |
| 3196 | 20 | 4 | -1.050000 | 8.746944487  | 11.682749320 | -1.033631378 | 0 | 0 | 1 | # | ob |
| 3197 | 20 | 4 | -1.050000 | 7.611539092  | 15.957810300 | -3.233079711 | 0 | 0 | 1 | # | ob |
| 3198 | 20 | 4 | -1.050000 | 6.158594487  | 16.137299320 | -1.033631378 | 0 | 0 | 1 | # | ob |
| 3199 | 20 | 4 | -1.050000 | 6.783155513  | 15.044550680 | 1.033631378  | 0 | 0 | 1 | # | ob |
| 3200 | 20 | 4 | -1.050000 | 10.199889092 | 11.503260300 | -3.233079711 | 0 | 0 | 1 | # | ob |
| 3201 | 20 | 4 | -1.050000 | 6.783735345  | 11.686148519 | 1.033422068  | 0 | 0 | 1 | # | ob |
| 3202 | 20 | 4 | -1.050000 | 7.918232736  | 15.967653874 | 3.231846262  | 0 | 0 | 1 | # | ob |
| 3203 | 20 | 4 | -1.050000 | 9.372085345  | 16.140698519 | 1.033422068  | 0 | 0 | 1 | # | ob |
| 3204 | 20 | 4 | -1.050000 | 5.329882736  | 11.513103874 | 3.231846262  | 0 | 0 | 1 | # | ob |
| 3205 | 20 | 4 | -1.050000 | 7.918560908  | 10.769489700 | 3.233079711  | 0 | 0 | 1 | # | ob |
| 3206 | 20 | 7 | -0.950000 | 7.175957657  | 8.910040996  | 1.012582885  | 0 | 0 | 1 | # | oh |
| 3207 | 20 | 4 | -1.050000 | 9.843781651  | 8.913076970  | 3.061482417  | 0 | 0 | 1 | # | ob |
| 3208 | 20 | 7 | -0.950000 | 9.764307657  | 13.364590996 | 1.012582885  | 0 | 0 | 1 | # | oh |
| 3209 | 20 | 4 | -1.050000 | 7.255431651  | 13.367626970 | 3.061482417  | 0 | 0 | 1 | # | ob |
| 3210 | 20 | 7 | -0.950000 | 8.354142343  | 17.817259004 | -1.012582885 | 0 | 0 | 1 | # | oh |
| 3211 | 20 | 4 | -1.050000 | 5.686318349  | 17.814223030 | -3.061482417 | 0 | 0 | 1 | # | ob |
| 3212 | 20 | 7 | -0.950000 | 5.765792343  | 13.362709004 | -1.012582885 | 0 | 0 | 1 | # | oh |
| 3213 | 20 | 4 | -1.050000 | 8.274668349  | 13.359673030 | -3.061482417 | 0 | 0 | 1 | # | ob |
| 3214 | 20 | 4 | -1.050000 | 9.371505513  | 10.590000680 | 1.033631378  | 0 | 0 | 1 | # | ob |
| 3215 | 20 | 4 | -1.050000 | 5.330210908  | 15.224039700 | 3.233079711  | 0 | 0 | 1 | # | ob |
| 3216 | 20 | 4 | -1.050000 | 8.746364655  | 15.041151481 | -1.033422068 | 0 | 0 | 1 | # | ob |
| 3217 | 20 | 4 | -1.050000 | 7.611867264  | 10.759646126 | -3.231846262 | 0 | 0 | 1 | # | ob |
| 3218 | 20 | 8 | 2.100000  | 9.399697014  | 10.436219204 | 2.662777170  | 0 | 0 | 1 | # | st |
| 3219 | 20 | 8 | 2.100000  | 8.718727774  | 14.882470782 | -2.661798097 | 0 | 0 | 1 | # | st |
| 3220 | 20 | 8 | 2.100000  | 6.130402986  | 16.291080796 | -2.662777170 | 0 | 0 | 1 | # | st |
| 3221 | 20 | 8 | 2.100000  | 8.718752986  | 11.836530796 | -2.662777170 | 0 | 0 | 1 | # | st |
| 3222 | 20 | 8 | 2.100000  | 9.399722226  | 16.299379218 | 2.661798097  | 0 | 0 | 1 | # | st |
| 3223 | 20 | 8 | 2.100000  | 6.811372226  | 11.844829218 | 2.661798097  | 0 | 0 | 1 | # | st |
| 3224 | 20 | 8 | 2.100000  | 6.811347014  | 14.890769204 | 2.662777170  | 0 | 0 | 1 | # | st |
| 3225 | 20 | 8 | 2.100000  | 6.130377774  | 10.427920782 | -2.661798097 | 0 | 0 | 1 | # | st |
| 3226 | 20 | 1 | 1.575000  | 7.765255029  | 19.292861568 | 0.000270632  | 0 | 0 | 1 | # | ao |
| 3227 | 20 | 1 | 1.575000  | 5.176905029  | 23.747411568 | 0.000270632  | 0 | 0 | 1 | # | ao |
| 3228 | 20 | 1 | 1.575000  | 7.764844971  | 25.252638432 | -0.000270632 | 0 | 0 | 1 | # | ao |
| 3229 | 20 | 1 | 1.575000  | 10.353194971 | 20.798088432 | -0.000270632 | 0 | 0 | 1 | # | ao |
| 3230 | 20 | 2 | 0.425000  | 8.911350872  | 22.275467322 | 1.486115063  | 0 | 0 | 1 | # | ho |
| 3231 | 20 | 2 | 0.425000  | 6.323000872  | 17.820917322 | 1.486115063  | 0 | 0 | 1 | # | ho |
| 3232 | 20 | 2 | 0.425000  | 6.618749128  | 22.270032678 | -1.486115063 | 0 | 0 | 1 | # | ho |
| 3233 | 20 | 2 | 0.425000  | 9.207099128  | 26.724582678 | -1.486115063 | 0 | 0 | 1 | # | ho |
| 3234 | 20 | 4 | -1.050000 | 6.158014655  | 19.495701481 | -1.033422068 | 0 | 0 | 1 | # | ob |
| 3235 | 20 | 4 | -1.050000 | 10.200217264 | 24.123296126 | -3.231846262 | 0 | 0 | 1 | # | ob |
| 3236 | 20 | 4 | -1.050000 | 8.746944487  | 20.591849320 | -1.033631378 | 0 | 0 | 1 | # | ob |
| 3237 | 20 | 4 | -1.050000 | 7.611539092  | 24.866910300 | -3.233079711 | 0 | 0 | 1 | # | ob |
| 3238 | 20 | 4 | -1.050000 | 6.158594487  | 25.046399320 | -1.033631378 | 0 | 0 | 1 | # | ob |
| 3239 | 20 | 4 | -1.050000 | 6.783155513  | 23.953650680 | 1.033631378  | 0 | 0 | 1 | # | ob |
| 3240 | 20 | 4 | -1.050000 | 10.199889092 | 20.412360300 | -3.233079711 | 0 | 0 | 1 | # | ob |
| 3241 | 20 | 4 | -1.050000 | 6.783735345  | 20.595248519 | 1.033422068  | 0 | 0 | 1 | # | ob |
| 3242 | 20 | 4 | -1.050000 | 7.918232736  | 24.876753874 | 3.231846262  | 0 | 0 | 1 | # | ob |
| 3243 | 20 | 4 | -1.050000 | 9.372085345  | 25.049798519 | 1.033422068  | 0 | 0 | 1 | # | ob |
| 3244 | 20 | 4 | -1.050000 | 5.329882736  | 20.422203874 | 3.231846262  | 0 | 0 | 1 | # | ob |
| 3245 | 20 | 4 | -1.050000 | 7.918560908  | 19.678589700 | 3.233079711  | 0 | 0 | 1 | # | ob |
| 3246 | 20 | 7 | -0.950000 | 7.175957657  | 17.819140996 | 1.012582885  | 0 | 0 | 1 | # | oh |
| 3247 | 20 | 4 | -1.050000 | 9.843781651  | 17.822176970 | 3.061482417  | 0 | 0 | 1 | # | ob |

|      |    |   |           |              |               |              |   |   |   |   |     |
|------|----|---|-----------|--------------|---------------|--------------|---|---|---|---|-----|
| 3248 | 20 | 7 | -0.950000 | 9.764307657  | 22.273690996  | 1.012582885  | 0 | 0 | 1 | # | oh  |
| 3249 | 20 | 4 | -1.050000 | 7.255431651  | 22.276726970  | 3.061482417  | 0 | 0 | 1 | # | ob  |
| 3250 | 20 | 7 | -0.950000 | 8.354142343  | 26.726359004  | -1.012582885 | 0 | 0 | 1 | # | oh  |
| 3251 | 20 | 4 | -1.050000 | 5.686318349  | 26.723323030  | -3.061482417 | 0 | 0 | 1 | # | ob  |
| 3252 | 20 | 7 | -0.950000 | 5.765792343  | 22.271809004  | -1.012582885 | 0 | 0 | 1 | # | oh  |
| 3253 | 20 | 4 | -1.050000 | 8.274668349  | 22.268773030  | -3.061482417 | 0 | 0 | 1 | # | ob  |
| 3254 | 20 | 4 | -1.050000 | 9.371505513  | 19.499100680  | 1.033631378  | 0 | 0 | 1 | # | ob  |
| 3255 | 20 | 4 | -1.050000 | 5.330210908  | 24.133139700  | 3.233079711  | 0 | 0 | 1 | # | ob  |
| 3256 | 20 | 4 | -1.050000 | 8.746364655  | 23.950251481  | -1.033422068 | 0 | 0 | 1 | # | ob  |
| 3257 | 20 | 4 | -1.050000 | 7.611867264  | 19.668746126  | -3.231846262 | 0 | 0 | 1 | # | ob  |
| 3258 | 20 | 8 | 2.100000  | 9.399697014  | 19.345319204  | 2.662777170  | 0 | 0 | 1 | # | st  |
| 3259 | 20 | 8 | 2.100000  | 8.718727774  | 23.791570782  | -2.661798097 | 0 | 0 | 1 | # | st  |
| 3260 | 20 | 8 | 2.100000  | 6.130402986  | 25.200180796  | -2.662777170 | 0 | 0 | 1 | # | st  |
| 3261 | 20 | 8 | 2.100000  | 8.718752986  | 20.745630796  | -2.662777170 | 0 | 0 | 1 | # | st  |
| 3262 | 20 | 8 | 2.100000  | 9.399722226  | 25.208479218  | 2.661798097  | 0 | 0 | 1 | # | st  |
| 3263 | 20 | 8 | 2.100000  | 6.811372226  | 20.753929218  | 2.661798097  | 0 | 0 | 1 | # | st  |
| 3264 | 20 | 8 | 2.100000  | 6.811347014  | 23.799869204  | 2.662777170  | 0 | 0 | 1 | # | st  |
| 3265 | 20 | 8 | 2.100000  | 6.130377774  | 19.337020782  | -2.661798097 | 0 | 0 | 1 | # | st  |
| 3266 | 20 | 1 | 1.575000  | 7.765255029  | -27.434438432 | 0.000270632  | 0 | 1 | 1 | # | ao  |
| 3267 | 20 | 1 | 1.575000  | 5.176905029  | -22.979888432 | 0.000270632  | 0 | 1 | 1 | # | ao  |
| 3268 | 20 | 1 | 1.575000  | 7.764844971  | -21.474661568 | -0.000270632 | 0 | 1 | 1 | # | ao  |
| 3269 | 20 | 1 | 1.575000  | 10.353194971 | -25.929211568 | -0.000270632 | 0 | 1 | 1 | # | ao  |
| 3270 | 20 | 2 | 0.425000  | 8.911350872  | -24.451832678 | 1.486115063  | 0 | 0 | 1 | # | ho  |
| 3271 | 20 | 2 | 0.425000  | 6.323000872  | 26.730017322  | 1.486115063  | 0 | 0 | 1 | # | ho  |
| 3272 | 20 | 2 | 0.425000  | 6.618749128  | -24.457267322 | -1.486115063 | 0 | 1 | 1 | # | ho  |
| 3273 | 20 | 3 | 0.425000  | 9.207099128  | -20.002717322 | -1.486115063 | 0 | 1 | 1 | # | do  |
| 3274 | 20 | 4 | -1.050000 | 6.158014655  | -27.231598519 | -1.033422068 | 0 | 1 | 1 | # | ob  |
| 3275 | 20 | 4 | -1.050000 | 10.200217264 | -22.604003874 | -3.231846262 | 0 | 1 | 1 | # | ob  |
| 3276 | 20 | 4 | -1.050000 | 8.746944487  | -26.135450680 | -1.033631378 | 0 | 1 | 1 | # | ob  |
| 3277 | 20 | 4 | -1.050000 | 7.611539092  | -21.860389700 | -3.233079711 | 0 | 1 | 1 | # | ob  |
| 3278 | 20 | 4 | -1.050000 | 6.158594487  | -21.680900680 | -1.033631378 | 0 | 1 | 1 | # | ob  |
| 3279 | 20 | 4 | -1.050000 | 6.783155513  | -22.773649320 | 1.033631378  | 0 | 1 | 1 | # | ob  |
| 3280 | 20 | 4 | -1.050000 | 10.199889092 | -26.314939700 | -3.233079711 | 0 | 1 | 1 | # | ob  |
| 3281 | 20 | 4 | -1.050000 | 6.783735345  | -26.132051481 | 1.033422068  | 0 | 1 | 1 | # | ob  |
| 3282 | 20 | 4 | -1.050000 | 7.918232736  | -21.850546126 | 3.231846262  | 0 | 1 | 1 | # | ob  |
| 3283 | 20 | 4 | -1.050000 | 9.372085345  | -21.677501481 | 1.033422068  | 0 | 1 | 1 | # | ob  |
| 3284 | 20 | 4 | -1.050000 | 5.329882736  | -26.305096126 | 3.231846262  | 0 | 1 | 1 | # | ob  |
| 3285 | 20 | 4 | -1.050000 | 7.918560908  | -27.048710300 | 3.233079711  | 0 | 1 | 1 | # | ob  |
| 3286 | 20 | 7 | -0.950000 | 7.175957657  | 26.728240996  | 1.012582885  | 0 | 0 | 1 | # | oh  |
| 3287 | 20 | 4 | -1.050000 | 9.843781651  | 26.731276970  | 3.061482417  | 0 | 0 | 1 | # | ob  |
| 3288 | 20 | 7 | -0.950000 | 9.764307657  | -24.453609004 | 1.012582885  | 0 | 1 | 1 | # | oh  |
| 3289 | 20 | 4 | -1.050000 | 7.255431651  | -24.450573030 | 3.061482417  | 0 | 1 | 1 | # | ob  |
| 3290 | 20 | 5 | -0.950000 | 8.354142343  | -20.000940996 | -1.012582885 | 0 | 1 | 1 | # | oht |
| 3291 | 20 | 6 | -0.950000 | 5.686318349  | -20.003976970 | -3.061482417 | 0 | 1 | 1 | # | oht |
| 3292 | 20 | 7 | -0.950000 | 5.765792343  | -24.455490996 | -1.012582885 | 0 | 1 | 1 | # | oh  |
| 3293 | 20 | 4 | -1.050000 | 8.274668349  | -24.458526970 | -3.061482417 | 0 | 1 | 1 | # | ob  |
| 3294 | 20 | 4 | -1.050000 | 9.371505513  | -27.228199320 | 1.033631378  | 0 | 1 | 1 | # | ob  |
| 3295 | 20 | 4 | -1.050000 | 5.330210908  | -22.594160300 | 3.233079711  | 0 | 1 | 1 | # | ob  |
| 3296 | 20 | 4 | -1.050000 | 8.746364655  | -22.777048519 | -1.033422068 | 0 | 1 | 1 | # | ob  |
| 3297 | 20 | 4 | -1.050000 | 7.611867264  | -27.058553874 | -3.231846262 | 0 | 1 | 1 | # | ob  |
| 3298 | 20 | 8 | 2.100000  | 9.399697014  | -27.381980796 | 2.662777170  | 0 | 1 | 1 | # | st  |
| 3299 | 20 | 8 | 2.100000  | 8.718727774  | -22.935729218 | -2.661798097 | 0 | 1 | 1 | # | st  |
| 3300 | 20 | 8 | 2.100000  | 6.130402986  | -21.527119204 | -2.662777170 | 0 | 1 | 1 | # | st  |
| 3301 | 20 | 8 | 2.100000  | 8.718752986  | -25.981669204 | -2.662777170 | 0 | 1 | 1 | # | st  |
| 3302 | 20 | 8 | 2.100000  | 9.399722226  | -21.518820782 | 2.661798097  | 0 | 1 | 1 | # | st  |
| 3303 | 20 | 8 | 2.100000  | 6.811372226  | -25.973370782 | 2.661798097  | 0 | 1 | 1 | # | st  |
| 3304 | 20 | 8 | 2.100000  | 6.811347014  | -22.927430796 | 2.662777170  | 0 | 1 | 1 | # | st  |
| 3305 | 20 | 8 | 2.100000  | 6.130377774  | -27.390279218 | -2.661798097 | 0 | 1 | 1 | # | st  |
| 3306 | 21 | 1 | 1.575000  | 12.941955029 | 1.474661568   | 0.000270632  | 0 | 0 | 1 | # | ao  |
| 3307 | 21 | 1 | 1.575000  | 10.353605029 | 5.929211568   | 0.000270632  | 0 | 0 | 1 | # | ao  |
| 3308 | 21 | 1 | 1.575000  | 12.941544971 | 7.434438432   | -0.000270632 | 0 | 0 | 1 | # | ao  |
| 3309 | 21 | 1 | 1.575000  | 15.529894971 | 2.979888432   | -0.000270632 | 0 | 0 | 1 | # | ao  |
| 3310 | 21 | 2 | 0.425000  | 14.088050872 | 4.457267322   | 1.486115063  | 0 | 0 | 1 | # | ho  |
| 3311 | 21 | 3 | 0.425000  | 11.499700872 | 0.002717322   | 1.486115063  | 0 | 0 | 1 | # | do  |
| 3312 | 21 | 2 | 0.425000  | 11.795449128 | 4.451832678   | -1.486115063 | 0 | 0 | 1 | # | ho  |
| 3313 | 21 | 2 | 0.425000  | 14.383799128 | 8.906382678   | -1.486115063 | 0 | 0 | 1 | # | ho  |
| 3314 | 21 | 4 | -1.050000 | 11.334714655 | 1.677501481   | -1.033422068 | 0 | 0 | 1 | # | ob  |
| 3315 | 21 | 4 | -1.050000 | 15.376917264 | 6.305096126   | -3.231846262 | 0 | 0 | 1 | # | ob  |
| 3316 | 21 | 4 | -1.050000 | 13.923644487 | 2.773649320   | -1.033631378 | 0 | 0 | 1 | # | ob  |
| 3317 | 21 | 4 | -1.050000 | 12.788239092 | 7.048710300   | -3.233079711 | 0 | 0 | 1 | # | ob  |
| 3318 | 21 | 4 | -1.050000 | 11.335294487 | 7.228199320   | -1.033631378 | 0 | 0 | 1 | # | ob  |
| 3319 | 21 | 4 | -1.050000 | 11.959855513 | 6.135450680   | 1.033631378  | 0 | 0 | 1 | # | ob  |
| 3320 | 21 | 4 | -1.050000 | 15.376589092 | 2.594160300   | -3.233079711 | 0 | 0 | 1 | # | ob  |
| 3321 | 21 | 4 | -1.050000 | 11.960435345 | 2.777048519   | 1.033422068  | 0 | 0 | 1 | # | ob  |
| 3322 | 21 | 4 | -1.050000 | 13.094932736 | 7.058553874   | 3.231846262  | 0 | 0 | 1 | # | ob  |
| 3323 | 21 | 4 | -1.050000 | 14.548785345 | 7.231598519   | 1.033422068  | 0 | 0 | 1 | # | ob  |
| 3324 | 21 | 4 | -1.050000 | 10.506582736 | 2.604003874   | 3.231846262  | 0 | 0 | 1 | # | ob  |
| 3325 | 21 | 4 | -1.050000 | 13.095260908 | 1.860389700   | 3.233079711  | 0 | 0 | 1 | # | ob  |
| 3326 | 21 | 5 | -0.950000 | 12.352657657 | 0.000940996   | 1.012582885  | 0 | 0 | 1 | # | oht |
| 3327 | 21 | 6 | -0.950000 | 15.020481651 | 0.003976970   | 3.061482417  | 0 | 0 | 1 | # | oht |
| 3328 | 21 | 7 | -0.950000 | 14.941007657 | 4.455490996   | 1.012582885  | 0 | 0 | 1 | # | oh  |
| 3329 | 21 | 4 | -1.050000 | 12.432131651 | 4.458526970   | 3.061482417  | 0 | 0 | 1 | # | ob  |
| 3330 | 21 | 7 | -0.950000 | 13.530842343 | 8.908159004   | -1.012582885 | 0 | 0 | 1 | # | oh  |
| 3331 | 21 | 4 | -1.050000 | 10.863018349 | 8.905123030   | -3.061482417 | 0 | 0 | 1 | # | ob  |
| 3332 | 21 | 7 | -0.950000 | 10.942492343 | 4.453609004   | -1.012582885 | 0 | 0 | 1 | # | oh  |
| 3333 | 21 | 4 | -1.050000 | 13.451368349 | 4.450573030   | -3.061482417 | 0 | 0 | 1 | # | ob  |
| 3334 | 21 | 4 | -1.050000 | 14.548205513 | 1.680900680   | 1.033631378  | 0 | 0 | 1 | # | ob  |
| 3335 | 21 | 4 | -1.050000 | 10.506910908 | 6.314939700   | 3.233079711  | 0 | 0 | 1 | # | ob  |
| 3336 | 21 | 4 | -1.050000 | 13.923064655 | 6.132051481   | -1.033422068 | 0 | 0 | 1 | # | ob  |
| 3337 | 21 | 4 | -1.050000 | 12.788567264 | 1.850546126   | -3.231846262 | 0 | 0 | 1 | # | ob  |
| 3338 | 21 | 8 | 2.100000  | 14.576397014 | 1.527119204   | 2.662777170  | 0 | 0 | 1 | # | st  |
| 3339 | 21 | 8 | 2.100000  | 13.895427774 | 5.973370782   | -2.661798097 | 0 | 0 | 1 | # | st  |
| 3340 | 21 | 8 | 2.100000  | 11.307102986 | 7.381980796   | -2.662777170 | 0 | 0 | 1 | # | st  |

|      |    |   |           |              |               |              |   |   |   |   |    |
|------|----|---|-----------|--------------|---------------|--------------|---|---|---|---|----|
| 3341 | 21 | 8 | 2.100000  | 13.895452986 | 2.927430796   | -2.662777170 | 0 | 0 | 1 | # | st |
| 3342 | 21 | 8 | 2.100000  | 14.576422226 | 7.390279218   | 2.661798097  | 0 | 0 | 1 | # | st |
| 3343 | 21 | 8 | 2.100000  | 11.988072226 | 2.935729218   | 2.661798097  | 0 | 0 | 1 | # | st |
| 3344 | 21 | 8 | 2.100000  | 11.988047014 | 5.981669204   | 2.662777170  | 0 | 0 | 1 | # | st |
| 3345 | 21 | 8 | 2.100000  | 11.307077774 | 1.518820782   | -2.661798097 | 0 | 0 | 1 | # | st |
| 3346 | 21 | 1 | 1.575000  | 12.941955029 | 10.383761568  | 0.000270632  | 0 | 0 | 1 | # | ao |
| 3347 | 21 | 1 | 1.575000  | 10.353605029 | 14.838311568  | 0.000270632  | 0 | 0 | 1 | # | ao |
| 3348 | 21 | 1 | 1.575000  | 12.941544971 | 16.343538432  | -0.000270632 | 0 | 0 | 1 | # | ao |
| 3349 | 21 | 1 | 1.575000  | 15.529894971 | 11.888988432  | -0.000270632 | 0 | 0 | 1 | # | ao |
| 3350 | 21 | 2 | 0.425000  | 14.088050872 | 13.366367322  | 1.486115063  | 0 | 0 | 1 | # | ho |
| 3351 | 21 | 2 | 0.425000  | 11.499700872 | 8.911817322   | 1.486115063  | 0 | 0 | 1 | # | ho |
| 3352 | 21 | 2 | 0.425000  | 11.795449128 | 13.360932678  | -1.486115063 | 0 | 0 | 1 | # | ho |
| 3353 | 21 | 2 | 0.425000  | 14.383799128 | 17.815482678  | -1.486115063 | 0 | 0 | 1 | # | ho |
| 3354 | 21 | 4 | -1.050000 | 11.334714655 | 10.586601481  | -1.033422068 | 0 | 0 | 1 | # | ob |
| 3355 | 21 | 4 | -1.050000 | 15.376917264 | 15.214196126  | -3.231846262 | 0 | 0 | 1 | # | ob |
| 3356 | 21 | 4 | -1.050000 | 13.923644487 | 11.682749320  | -1.033631378 | 0 | 0 | 1 | # | ob |
| 3357 | 21 | 4 | -1.050000 | 12.788239092 | 15.957810300  | -3.233079711 | 0 | 0 | 1 | # | ob |
| 3358 | 21 | 4 | -1.050000 | 11.335294487 | 16.137299320  | -1.033631378 | 0 | 0 | 1 | # | ob |
| 3359 | 21 | 4 | -1.050000 | 11.959855513 | 15.044550680  | 1.033631378  | 0 | 0 | 1 | # | ob |
| 3360 | 21 | 4 | -1.050000 | 15.376589092 | 11.503260300  | -3.233079711 | 0 | 0 | 1 | # | ob |
| 3361 | 21 | 4 | -1.050000 | 11.960435345 | 11.686148519  | 1.033422068  | 0 | 0 | 1 | # | ob |
| 3362 | 21 | 4 | -1.050000 | 13.094932736 | 15.967653874  | 3.231846262  | 0 | 0 | 1 | # | ob |
| 3363 | 21 | 4 | -1.050000 | 14.548785345 | 16.140698519  | 1.033422068  | 0 | 0 | 1 | # | ob |
| 3364 | 21 | 4 | -1.050000 | 10.506582736 | 11.513103874  | 3.231846262  | 0 | 0 | 1 | # | ob |
| 3365 | 21 | 4 | -1.050000 | 13.095260908 | 10.769489700  | 3.233079711  | 0 | 0 | 1 | # | ob |
| 3366 | 21 | 7 | -0.950000 | 12.352657657 | 8.910040996   | 1.012582885  | 0 | 0 | 1 | # | oh |
| 3367 | 21 | 4 | -1.050000 | 15.020481651 | 8.913076970   | 3.061482417  | 0 | 0 | 1 | # | ob |
| 3368 | 21 | 7 | -0.950000 | 14.941007657 | 13.364590996  | 1.012582885  | 0 | 0 | 1 | # | oh |
| 3369 | 21 | 4 | -1.050000 | 12.432131651 | 13.367626970  | 3.061482417  | 0 | 0 | 1 | # | ob |
| 3370 | 21 | 7 | -0.950000 | 13.530842343 | 17.817259004  | -1.012582885 | 0 | 0 | 1 | # | oh |
| 3371 | 21 | 4 | -1.050000 | 10.863018349 | 17.814223030  | -3.061482417 | 0 | 0 | 1 | # | ob |
| 3372 | 21 | 7 | -0.950000 | 10.942492343 | 13.362709004  | -1.012582885 | 0 | 0 | 1 | # | oh |
| 3373 | 21 | 4 | -1.050000 | 13.451368349 | 13.359673030  | -3.061482417 | 0 | 0 | 1 | # | ob |
| 3374 | 21 | 4 | -1.050000 | 14.548205513 | 10.590000680  | 1.033631378  | 0 | 0 | 1 | # | ob |
| 3375 | 21 | 4 | -1.050000 | 10.506910908 | 15.224039700  | 3.233079711  | 0 | 0 | 1 | # | ob |
| 3376 | 21 | 4 | -1.050000 | 13.923064655 | 15.041151481  | -1.033422068 | 0 | 0 | 1 | # | ob |
| 3377 | 21 | 4 | -1.050000 | 12.788567264 | 10.759646126  | -3.231846262 | 0 | 0 | 1 | # | ob |
| 3378 | 21 | 8 | 2.100000  | 14.576397014 | 10.436219204  | 2.662777170  | 0 | 0 | 1 | # | st |
| 3379 | 21 | 8 | 2.100000  | 13.895427774 | 14.882470782  | -2.661798097 | 0 | 0 | 1 | # | st |
| 3380 | 21 | 8 | 2.100000  | 11.307102986 | 16.291080796  | -2.662777170 | 0 | 0 | 1 | # | st |
| 3381 | 21 | 8 | 2.100000  | 13.895452986 | 11.836530796  | -2.662777170 | 0 | 0 | 1 | # | st |
| 3382 | 21 | 8 | 2.100000  | 14.576422226 | 16.299379218  | 2.661798097  | 0 | 0 | 1 | # | st |
| 3383 | 21 | 8 | 2.100000  | 11.988072226 | 11.844829218  | 2.661798097  | 0 | 0 | 1 | # | st |
| 3384 | 21 | 8 | 2.100000  | 11.988047014 | 14.890769204  | 2.662777170  | 0 | 0 | 1 | # | st |
| 3385 | 21 | 8 | 2.100000  | 11.307077774 | 10.427920782  | -2.661798097 | 0 | 0 | 1 | # | st |
| 3386 | 21 | 1 | 1.575000  | 12.941955029 | 19.292861568  | 0.000270632  | 0 | 0 | 1 | # | ao |
| 3387 | 21 | 1 | 1.575000  | 10.353605029 | 23.747411568  | 0.000270632  | 0 | 0 | 1 | # | ao |
| 3388 | 21 | 1 | 1.575000  | 12.941544971 | 25.252638432  | -0.000270632 | 0 | 0 | 1 | # | ao |
| 3389 | 21 | 1 | 1.575000  | 15.529894971 | 20.798088432  | -0.000270632 | 0 | 0 | 1 | # | ao |
| 3390 | 21 | 2 | 0.425000  | 14.088050872 | 22.275467322  | 1.486115063  | 0 | 0 | 1 | # | ho |
| 3391 | 21 | 2 | 0.425000  | 11.499700872 | 17.820917322  | 1.486115063  | 0 | 0 | 1 | # | ho |
| 3392 | 21 | 2 | 0.425000  | 11.795449128 | 22.270032678  | -1.486115063 | 0 | 0 | 1 | # | ho |
| 3393 | 21 | 2 | 0.425000  | 14.383799128 | 26.724582678  | -1.486115063 | 0 | 0 | 1 | # | ho |
| 3394 | 21 | 4 | -1.050000 | 11.334714655 | 19.495701481  | -1.033422068 | 0 | 0 | 1 | # | ob |
| 3395 | 21 | 4 | -1.050000 | 15.376917264 | 24.123296126  | -3.231846262 | 0 | 0 | 1 | # | ob |
| 3396 | 21 | 4 | -1.050000 | 13.923644487 | 20.591849320  | -1.033631378 | 0 | 0 | 1 | # | ob |
| 3397 | 21 | 4 | -1.050000 | 12.788239092 | 24.866910300  | -3.233079711 | 0 | 0 | 1 | # | ob |
| 3398 | 21 | 4 | -1.050000 | 11.335294487 | 25.046399320  | -1.033631378 | 0 | 0 | 1 | # | ob |
| 3399 | 21 | 4 | -1.050000 | 11.959855513 | 23.953650680  | 1.033631378  | 0 | 0 | 1 | # | ob |
| 3400 | 21 | 4 | -1.050000 | 15.376589092 | 20.412360300  | -3.233079711 | 0 | 0 | 1 | # | ob |
| 3401 | 21 | 4 | -1.050000 | 11.960435345 | 20.595248519  | 1.033422068  | 0 | 0 | 1 | # | ob |
| 3402 | 21 | 4 | -1.050000 | 13.094932736 | 24.876753874  | 3.231846262  | 0 | 0 | 1 | # | ob |
| 3403 | 21 | 4 | -1.050000 | 14.548785345 | 25.049798519  | 1.033422068  | 0 | 0 | 1 | # | ob |
| 3404 | 21 | 4 | -1.050000 | 10.506582736 | 20.422203874  | 3.231846262  | 0 | 0 | 1 | # | ob |
| 3405 | 21 | 4 | -1.050000 | 13.095260908 | 19.678589700  | 3.233079711  | 0 | 0 | 1 | # | ob |
| 3406 | 21 | 7 | -0.950000 | 12.352657657 | 17.819140996  | 1.012582885  | 0 | 0 | 1 | # | oh |
| 3407 | 21 | 4 | -1.050000 | 15.020481651 | 17.822176970  | 3.061482417  | 0 | 0 | 1 | # | ob |
| 3408 | 21 | 7 | -0.950000 | 14.941007657 | 22.273690996  | 1.012582885  | 0 | 0 | 1 | # | oh |
| 3409 | 21 | 4 | -1.050000 | 12.432131651 | 22.276726970  | 3.061482417  | 0 | 0 | 1 | # | ob |
| 3410 | 21 | 7 | -0.950000 | 13.530842343 | 26.726359004  | -1.012582885 | 0 | 0 | 1 | # | oh |
| 3411 | 21 | 4 | -1.050000 | 10.863018349 | 26.723323030  | -3.061482417 | 0 | 0 | 1 | # | ob |
| 3412 | 21 | 7 | -0.950000 | 10.942492343 | 22.271809004  | -1.012582885 | 0 | 0 | 1 | # | oh |
| 3413 | 21 | 4 | -1.050000 | 13.451368349 | 22.268773030  | -3.061482417 | 0 | 0 | 1 | # | ob |
| 3414 | 21 | 4 | -1.050000 | 14.548205513 | 19.499100680  | 1.033631378  | 0 | 0 | 1 | # | ob |
| 3415 | 21 | 4 | -1.050000 | 10.506910908 | 24.133139700  | 3.233079711  | 0 | 0 | 1 | # | ob |
| 3416 | 21 | 4 | -1.050000 | 13.923064655 | 23.950251481  | -1.033422068 | 0 | 0 | 1 | # | ob |
| 3417 | 21 | 4 | -1.050000 | 12.788567264 | 19.668746126  | -3.231846262 | 0 | 0 | 1 | # | ob |
| 3418 | 21 | 8 | 2.100000  | 14.576397014 | 19.345319204  | 2.662777170  | 0 | 0 | 1 | # | st |
| 3419 | 21 | 8 | 2.100000  | 13.895427774 | 23.791570782  | -2.661798097 | 0 | 0 | 1 | # | st |
| 3420 | 21 | 8 | 2.100000  | 11.307102986 | 25.200180796  | -2.662777170 | 0 | 0 | 1 | # | st |
| 3421 | 21 | 8 | 2.100000  | 13.895452986 | 20.745630796  | -2.662777170 | 0 | 0 | 1 | # | st |
| 3422 | 21 | 8 | 2.100000  | 14.576422226 | 25.208479218  | 2.661798097  | 0 | 0 | 1 | # | st |
| 3423 | 21 | 8 | 2.100000  | 11.988072226 | 20.753929218  | 2.661798097  | 0 | 0 | 1 | # | st |
| 3424 | 21 | 8 | 2.100000  | 11.988047014 | 23.799869204  | 2.662777170  | 0 | 0 | 1 | # | st |
| 3425 | 21 | 8 | 2.100000  | 11.307077774 | 19.337020782  | -2.661798097 | 0 | 0 | 1 | # | st |
| 3426 | 21 | 1 | 1.575000  | 12.941955029 | -27.434438432 | 0.000270632  | 0 | 1 | 1 | # | ao |
| 3427 | 21 | 1 | 1.575000  | 10.353605029 | -22.979888432 | 0.000270632  | 0 | 1 | 1 | # | ao |
| 3428 | 21 | 1 | 1.575000  | 12.941544971 | -21.474661568 | -0.000270632 | 0 | 1 | 1 | # | ao |
| 3429 | 21 | 1 | 1.575000  | 15.529894971 | -25.929211568 | -0.000270632 | 0 | 1 | 1 | # | ao |
| 3430 | 21 | 2 | 0.425000  | 14.088050872 | -24.451832678 | 1.486115063  | 0 | 1 | 1 | # | ho |
| 3431 | 21 | 2 | 0.425000  | 11.499700872 | 26.730017322  | 1.486115063  | 0 | 0 | 1 | # | ho |
| 3432 | 21 | 2 | 0.425000  | 11.795449128 | -24.457267322 | -1.486115063 | 0 | 1 | 1 | # | ho |
| 3433 | 21 | 3 | 0.425000  | 14.383799128 | -20.002717322 | -1.486115063 | 0 | 1 | 1 | # | do |

|      |    |   |           |               |               |              |   |   |   |   |    |
|------|----|---|-----------|---------------|---------------|--------------|---|---|---|---|----|
| 3434 | 21 | 4 | -1.050000 | 11.334714655  | -27.231598519 | -1.033422068 | 0 | 1 | 1 | # | ob |
| 3435 | 21 | 4 | -1.050000 | 15.376917264  | -22.604003874 | -3.231846262 | 0 | 1 | 1 | # | ob |
| 3436 | 21 | 4 | -1.050000 | 13.923644487  | -26.135450680 | -1.033631378 | 0 | 1 | 1 | # | ob |
| 3437 | 21 | 4 | -1.050000 | 12.788239092  | -21.860389700 | -3.233079711 | 0 | 1 | 1 | # | ob |
| 3438 | 21 | 4 | -1.050000 | 11.335294487  | -21.680900680 | -1.033631378 | 0 | 1 | 1 | # | ob |
| 3439 | 21 | 4 | -1.050000 | 11.959855513  | -22.773649320 | 1.033631378  | 0 | 1 | 1 | # | ob |
| 3440 | 21 | 4 | -1.050000 | 15.376589092  | -26.314939700 | -3.233079711 | 0 | 1 | 1 | # | ob |
| 3441 | 21 | 4 | -1.050000 | 11.960435345  | -26.132051481 | 1.033422068  | 0 | 1 | 1 | # | ob |
| 3442 | 21 | 4 | -1.050000 | 13.094932736  | -21.850546126 | 3.231846262  | 0 | 1 | 1 | # | ob |
| 3443 | 21 | 4 | -1.050000 | 14.548785345  | -21.677501481 | 1.033422068  | 0 | 1 | 1 | # | ob |
| 3444 | 21 | 4 | -1.050000 | 10.506582736  | -26.305096126 | 3.231846262  | 0 | 1 | 1 | # | ob |
| 3445 | 21 | 4 | -1.050000 | 13.095260908  | -27.048710300 | 3.233079711  | 0 | 1 | 1 | # | ob |
| 3446 | 21 | 7 | -0.950000 | 12.352657657  | 26.728240996  | 1.012582885  | 0 | 0 | 1 | # | oh |
| 3447 | 21 | 4 | -1.050000 | 15.020481651  | 26.731276970  | 3.061482417  | 0 | 0 | 1 | # | ob |
| 3448 | 21 | 7 | -0.950000 | 14.941007657  | -24.453609004 | 1.012582885  | 0 | 1 | 1 | # | oh |
| 3449 | 21 | 4 | -1.050000 | 12.432131651  | -24.450573030 | 3.061482417  | 0 | 1 | 1 | # | ob |
| 3450 | 21 | 5 | -0.950000 | 13.530842343  | -20.000940996 | -1.012582885 | 0 | 1 | 1 | # | oh |
| 3451 | 21 | 6 | -0.950000 | 10.863018349  | -20.003976970 | -3.061482417 | 0 | 1 | 1 | # | oh |
| 3452 | 21 | 7 | -0.950000 | 10.942492343  | -24.455490996 | -1.012582885 | 0 | 1 | 1 | # | oh |
| 3453 | 21 | 4 | -1.050000 | 13.451368349  | -24.458526970 | -3.061482417 | 0 | 1 | 1 | # | ob |
| 3454 | 21 | 4 | -1.050000 | 14.548205513  | -27.228199320 | 1.033631378  | 0 | 1 | 1 | # | ob |
| 3455 | 21 | 4 | -1.050000 | 10.506910908  | -22.594160300 | 3.233079711  | 0 | 1 | 1 | # | ob |
| 3456 | 21 | 4 | -1.050000 | 13.923064655  | -22.777048519 | -1.033422068 | 0 | 1 | 1 | # | ob |
| 3457 | 21 | 4 | -1.050000 | 12.788567264  | -27.058553874 | -3.231846262 | 0 | 1 | 1 | # | ob |
| 3458 | 21 | 8 | 2.100000  | 14.576397014  | -27.381980796 | 2.662777170  | 0 | 1 | 1 | # | st |
| 3459 | 21 | 8 | 2.100000  | 13.895427774  | -22.935729218 | -2.661798097 | 0 | 1 | 1 | # | st |
| 3460 | 21 | 8 | 2.100000  | 11.307102986  | -21.527119204 | -2.662777170 | 0 | 1 | 1 | # | st |
| 3461 | 21 | 8 | 2.100000  | 13.895452986  | -25.981669204 | -2.662777170 | 0 | 1 | 1 | # | st |
| 3462 | 21 | 8 | 2.100000  | 14.576422226  | -21.518820782 | 2.661798097  | 0 | 1 | 1 | # | st |
| 3463 | 21 | 8 | 2.100000  | 11.988072226  | -25.973370782 | 2.661798097  | 0 | 1 | 1 | # | st |
| 3464 | 21 | 8 | 2.100000  | 11.988047014  | -22.927430796 | 2.662777170  | 0 | 1 | 1 | # | st |
| 3465 | 21 | 8 | 2.100000  | 11.307077774  | -27.390279218 | -2.661798097 | 0 | 1 | 1 | # | st |
| 3466 | 22 | 1 | 1.575000  | -12.941544971 | 1.474661568   | 0.000270632  | 1 | 0 | 1 | # | ao |
| 3467 | 22 | 1 | 1.575000  | -15.529894971 | 5.929211568   | 0.000270632  | 1 | 0 | 1 | # | ao |
| 3468 | 22 | 1 | 1.575000  | -12.941955029 | 7.434438432   | -0.000270632 | 1 | 0 | 1 | # | ao |
| 3469 | 22 | 1 | 1.575000  | -10.353605029 | 2.979888432   | -0.000270632 | 1 | 0 | 1 | # | ao |
| 3470 | 22 | 2 | 0.425000  | -11.795449128 | 4.457267322   | 1.486115063  | 1 | 0 | 1 | # | ho |
| 3471 | 22 | 3 | 0.425000  | -14.383799128 | 0.002717322   | 1.486115063  | 1 | 0 | 1 | # | do |
| 3472 | 22 | 2 | 0.425000  | -14.088050872 | 4.451832678   | -1.486115063 | 1 | 0 | 1 | # | ho |
| 3473 | 22 | 2 | 0.425000  | -11.499700872 | 8.906382678   | -1.486115063 | 1 | 0 | 1 | # | ho |
| 3474 | 22 | 4 | -1.050000 | -14.548785345 | 1.677501481   | -1.033422068 | 1 | 0 | 1 | # | ob |
| 3475 | 22 | 4 | -1.050000 | -10.506582736 | 6.305096126   | -3.231846262 | 1 | 0 | 1 | # | ob |
| 3476 | 22 | 4 | -1.050000 | -11.959855513 | 2.773649320   | -1.033631378 | 1 | 0 | 1 | # | ob |
| 3477 | 22 | 4 | -1.050000 | -13.095260908 | 7.048710300   | -3.233079711 | 1 | 0 | 1 | # | ob |
| 3478 | 22 | 4 | -1.050000 | -14.548205513 | 7.228199320   | -1.033631378 | 1 | 0 | 1 | # | ob |
| 3479 | 22 | 4 | -1.050000 | -13.923644487 | 6.135450680   | 1.033631378  | 1 | 0 | 1 | # | ob |
| 3480 | 22 | 4 | -1.050000 | -10.506910908 | 2.594160300   | -3.233079711 | 1 | 0 | 1 | # | ob |
| 3481 | 22 | 4 | -1.050000 | -13.923064655 | 2.777048519   | 1.033422068  | 1 | 0 | 1 | # | ob |
| 3482 | 22 | 4 | -1.050000 | -12.788567264 | 7.058553874   | 3.231846262  | 1 | 0 | 1 | # | ob |
| 3483 | 22 | 4 | -1.050000 | -11.334714655 | 7.231598519   | 1.033422068  | 1 | 0 | 1 | # | ob |
| 3484 | 22 | 4 | -1.050000 | -15.376917264 | 2.604003874   | 3.231846262  | 1 | 0 | 1 | # | ob |
| 3485 | 22 | 4 | -1.050000 | -12.788239092 | 1.860389700   | 3.233079711  | 1 | 0 | 1 | # | ob |
| 3486 | 22 | 5 | -0.950000 | -13.530842343 | 0.000940996   | 1.012582885  | 1 | 0 | 1 | # | oh |
| 3487 | 22 | 6 | -0.950000 | -10.863018349 | 0.003976970   | 3.061482417  | 1 | 0 | 1 | # | oh |
| 3488 | 22 | 7 | -0.950000 | -10.942492343 | 4.455490996   | 1.012582885  | 1 | 0 | 1 | # | oh |
| 3489 | 22 | 4 | -1.050000 | -13.451368349 | 4.458526970   | 3.061482417  | 1 | 0 | 1 | # | ob |
| 3490 | 22 | 7 | -0.950000 | -12.352657657 | 8.908159004   | -1.012582885 | 1 | 0 | 1 | # | oh |
| 3491 | 22 | 4 | -1.050000 | -15.020481651 | 8.905123030   | -3.061482417 | 1 | 0 | 1 | # | ob |
| 3492 | 22 | 7 | -0.950000 | -14.941007657 | 4.453609004   | -1.012582885 | 1 | 0 | 1 | # | oh |
| 3493 | 22 | 4 | -1.050000 | -12.432131651 | 4.450573030   | -3.061482417 | 1 | 0 | 1 | # | ob |
| 3494 | 22 | 4 | -1.050000 | -11.335294487 | 1.680900680   | 1.033631378  | 1 | 0 | 1 | # | ob |
| 3495 | 22 | 4 | -1.050000 | -15.376589092 | 6.314939700   | 3.233079711  | 1 | 0 | 1 | # | ob |
| 3496 | 22 | 4 | -1.050000 | -11.960435345 | 6.132051481   | -1.033422068 | 1 | 0 | 1 | # | ob |
| 3497 | 22 | 4 | -1.050000 | -13.094932736 | 1.850546126   | -3.231846262 | 1 | 0 | 1 | # | ob |
| 3498 | 22 | 8 | 2.100000  | -11.307102986 | 1.527119204   | 2.662777170  | 1 | 0 | 1 | # | st |
| 3499 | 22 | 8 | 2.100000  | -11.988072226 | 5.973370782   | -2.661798097 | 1 | 0 | 1 | # | st |
| 3500 | 22 | 8 | 2.100000  | -14.576397014 | 7.381980796   | -2.662777170 | 1 | 0 | 1 | # | st |
| 3501 | 22 | 8 | 2.100000  | -11.988047014 | 2.927430796   | -2.662777170 | 1 | 0 | 1 | # | st |
| 3502 | 22 | 8 | 2.100000  | -11.307077774 | 7.390279218   | 2.661798097  | 1 | 0 | 1 | # | st |
| 3503 | 22 | 8 | 2.100000  | -13.895427774 | 2.935729218   | 2.661798097  | 1 | 0 | 1 | # | st |
| 3504 | 22 | 8 | 2.100000  | -13.895452986 | 5.981669204   | 2.662777170  | 1 | 0 | 1 | # | st |
| 3505 | 22 | 8 | 2.100000  | -14.576422226 | 1.518820782   | -2.661798097 | 1 | 0 | 1 | # | st |
| 3506 | 22 | 1 | 1.575000  | -12.941544971 | 10.383761568  | 0.000270632  | 1 | 0 | 1 | # | ao |
| 3507 | 22 | 1 | 1.575000  | -15.529894971 | 14.838311568  | 0.000270632  | 1 | 0 | 1 | # | ao |
| 3508 | 22 | 1 | 1.575000  | -12.941955029 | 16.343538432  | -0.000270632 | 1 | 0 | 1 | # | ao |
| 3509 | 22 | 1 | 1.575000  | -10.353605029 | 11.888988432  | -0.000270632 | 1 | 0 | 1 | # | ao |
| 3510 | 22 | 2 | 0.425000  | -11.795449128 | 13.366367322  | 1.486115063  | 1 | 0 | 1 | # | ho |
| 3511 | 22 | 2 | 0.425000  | -14.383799128 | 8.911817322   | 1.486115063  | 1 | 0 | 1 | # | ho |
| 3512 | 22 | 2 | 0.425000  | -14.088050872 | 13.360932678  | -1.486115063 | 1 | 0 | 1 | # | ho |
| 3513 | 22 | 2 | 0.425000  | -11.499700872 | 17.815482678  | -1.486115063 | 1 | 0 | 1 | # | ho |
| 3514 | 22 | 4 | -1.050000 | -14.548785345 | 10.586601481  | -1.033422068 | 1 | 0 | 1 | # | ob |
| 3515 | 22 | 4 | -1.050000 | -10.506582736 | 15.214196126  | -3.231846262 | 1 | 0 | 1 | # | ob |
| 3516 | 22 | 4 | -1.050000 | -11.959855513 | 11.682749320  | -1.033631378 | 1 | 0 | 1 | # | ob |
| 3517 | 22 | 4 | -1.050000 | -13.095260908 | 15.957810300  | -3.233079711 | 1 | 0 | 1 | # | ob |
| 3518 | 22 | 4 | -1.050000 | -14.548205513 | 16.137299320  | -1.033631378 | 1 | 0 | 1 | # | ob |
| 3519 | 22 | 4 | -1.050000 | -13.923644487 | 15.044550680  | 1.033631378  | 1 | 0 | 1 | # | ob |
| 3520 | 22 | 4 | -1.050000 | -10.506910908 | 11.503260300  | -3.233079711 | 1 | 0 | 1 | # | ob |
| 3521 | 22 | 4 | -1.050000 | -13.923064655 | 11.686148519  | 1.033422068  | 1 | 0 | 1 | # | ob |
| 3522 | 22 | 4 | -1.050000 | -12.788567264 | 15.967653874  | 3.231846262  | 1 | 0 | 1 | # | ob |
| 3523 | 22 | 4 | -1.050000 | -11.334714655 | 16.140698519  | 1.033422068  | 1 | 0 | 1 | # | ob |
| 3524 | 22 | 4 | -1.050000 | -15.376917264 | 11.513103874  | 3.231846262  | 1 | 0 | 1 | # | ob |
| 3525 | 22 | 4 | -1.050000 | -12.788239092 | 10.769489700  | 3.233079711  | 1 | 0 | 1 | # | ob |
| 3526 | 22 | 7 | -0.950000 | -13.530842343 | 8.910040996   | 1.012582885  | 1 | 0 | 1 | # | oh |

|      |    |   |           |               |               |              |   |   |   |   |     |
|------|----|---|-----------|---------------|---------------|--------------|---|---|---|---|-----|
| 3527 | 22 | 4 | -1.050000 | -10.863018349 | 8.913076970   | 3.061482417  | 1 | 0 | 1 | # | ob  |
| 3528 | 22 | 7 | -0.950000 | -10.942492343 | 13.364590996  | 1.012582885  | 1 | 0 | 1 | # | oh  |
| 3529 | 22 | 4 | -1.050000 | -13.451368349 | 13.367626970  | 3.061482417  | 1 | 0 | 1 | # | ob  |
| 3530 | 22 | 7 | -0.950000 | -12.352657657 | 17.817259004  | -1.012582885 | 1 | 0 | 1 | # | oh  |
| 3531 | 22 | 4 | -1.050000 | -15.020481651 | 17.814223030  | -3.061482417 | 1 | 0 | 1 | # | ob  |
| 3532 | 22 | 7 | -0.950000 | -14.941007657 | 13.362709004  | -1.012582885 | 1 | 0 | 1 | # | oh  |
| 3533 | 22 | 4 | -1.050000 | -12.432131651 | 13.359673030  | -3.061482417 | 1 | 0 | 1 | # | ob  |
| 3534 | 22 | 4 | -1.050000 | -11.335294487 | 10.590000680  | 1.033631378  | 1 | 0 | 1 | # | ob  |
| 3535 | 22 | 4 | -1.050000 | -15.376589092 | 15.224039700  | 3.233079711  | 1 | 0 | 1 | # | ob  |
| 3536 | 22 | 4 | -1.050000 | -11.960435345 | 15.041151481  | -1.033422068 | 1 | 0 | 1 | # | ob  |
| 3537 | 22 | 4 | -1.050000 | -13.094932736 | 10.759646126  | -3.231846262 | 1 | 0 | 1 | # | ob  |
| 3538 | 22 | 8 | 2.100000  | -11.307102986 | 10.436219204  | 2.662777170  | 1 | 0 | 1 | # | st  |
| 3539 | 22 | 8 | 2.100000  | -11.988072226 | 14.882470782  | -2.661798097 | 1 | 0 | 1 | # | st  |
| 3540 | 22 | 8 | 2.100000  | -14.576397014 | 16.291080796  | -2.662777170 | 1 | 0 | 1 | # | st  |
| 3541 | 22 | 8 | 2.100000  | -11.988047014 | 11.836530796  | -2.662777170 | 1 | 0 | 1 | # | st  |
| 3542 | 22 | 8 | 2.100000  | -11.307077774 | 16.299379218  | 2.661798097  | 1 | 0 | 1 | # | st  |
| 3543 | 22 | 8 | 2.100000  | -13.895427774 | 11.844829218  | 2.661798097  | 1 | 0 | 1 | # | st  |
| 3544 | 22 | 8 | 2.100000  | -13.895452986 | 14.890769204  | 2.662777170  | 1 | 0 | 1 | # | st  |
| 3545 | 22 | 8 | 2.100000  | -14.576422226 | 10.427920782  | -2.661798097 | 1 | 0 | 1 | # | st  |
| 3546 | 22 | 1 | 1.575000  | -12.941544971 | 19.292861568  | 0.000270632  | 1 | 0 | 1 | # | ao  |
| 3547 | 22 | 1 | 1.575000  | -15.529894971 | 23.747411568  | 0.000270632  | 1 | 0 | 1 | # | ao  |
| 3548 | 22 | 1 | 1.575000  | -12.941955029 | 25.252638432  | -0.000270632 | 1 | 0 | 1 | # | ao  |
| 3549 | 22 | 1 | 1.575000  | -10.353605029 | 20.798088432  | -0.000270632 | 1 | 0 | 1 | # | ao  |
| 3550 | 22 | 2 | 0.425000  | -11.795449128 | 22.275467322  | 1.486115063  | 1 | 0 | 1 | # | ho  |
| 3551 | 22 | 2 | 0.425000  | -14.383799128 | 17.820917322  | 1.486115063  | 1 | 0 | 1 | # | ho  |
| 3552 | 22 | 2 | 0.425000  | -14.088050872 | 22.270032678  | -1.486115063 | 1 | 0 | 1 | # | ho  |
| 3553 | 22 | 2 | 0.425000  | -11.499700872 | 26.724582678  | -1.486115063 | 1 | 0 | 1 | # | ho  |
| 3554 | 22 | 4 | -1.050000 | -14.548785345 | 19.495701481  | -1.033422068 | 1 | 0 | 1 | # | ob  |
| 3555 | 22 | 4 | -1.050000 | -10.506582736 | 24.123296126  | -3.231846262 | 1 | 0 | 1 | # | ob  |
| 3556 | 22 | 4 | -1.050000 | -11.959855513 | 20.591849320  | -1.033631378 | 1 | 0 | 1 | # | ob  |
| 3557 | 22 | 4 | -1.050000 | -13.095260908 | 24.866910300  | -3.233079711 | 1 | 0 | 1 | # | ob  |
| 3558 | 22 | 4 | -1.050000 | -14.548205513 | 25.046399320  | -1.033631378 | 1 | 0 | 1 | # | ob  |
| 3559 | 22 | 4 | -1.050000 | -13.923644487 | 23.953650680  | 1.033631378  | 1 | 0 | 1 | # | ob  |
| 3560 | 22 | 4 | -1.050000 | -10.506910908 | 20.413260300  | -3.233079711 | 1 | 0 | 1 | # | ob  |
| 3561 | 22 | 4 | -1.050000 | -13.923064655 | 20.595248519  | 1.033422068  | 1 | 0 | 1 | # | ob  |
| 3562 | 22 | 4 | -1.050000 | -12.788567264 | 24.876753874  | 3.231846262  | 1 | 0 | 1 | # | ob  |
| 3563 | 22 | 4 | -1.050000 | -11.334714655 | 25.049798519  | 1.033422068  | 1 | 0 | 1 | # | ob  |
| 3564 | 22 | 4 | -1.050000 | -15.376917264 | 20.422203874  | 3.231846262  | 1 | 0 | 1 | # | ob  |
| 3565 | 22 | 4 | -1.050000 | -12.788239092 | 19.678589700  | 3.233079711  | 1 | 0 | 1 | # | ob  |
| 3566 | 22 | 7 | -0.950000 | -13.530842343 | 17.819140996  | 1.012582885  | 1 | 0 | 1 | # | oh  |
| 3567 | 22 | 4 | -1.050000 | -10.863018349 | 17.822176970  | 3.061482417  | 1 | 0 | 1 | # | ob  |
| 3568 | 22 | 7 | -0.950000 | -10.942492343 | 22.273690996  | 1.012582885  | 1 | 0 | 1 | # | oh  |
| 3569 | 22 | 4 | -1.050000 | -13.451368349 | 22.276726970  | 3.061482417  | 1 | 0 | 1 | # | ob  |
| 3570 | 22 | 7 | -0.950000 | -12.352657657 | 26.726359004  | -1.012582885 | 1 | 0 | 1 | # | oh  |
| 3571 | 22 | 4 | -1.050000 | -15.020481651 | 26.723323030  | -3.061482417 | 1 | 0 | 1 | # | ob  |
| 3572 | 22 | 7 | -0.950000 | -14.941007657 | 22.271809004  | -1.012582885 | 1 | 0 | 1 | # | oh  |
| 3573 | 22 | 4 | -1.050000 | -12.432131651 | 22.268773030  | -3.061482417 | 1 | 0 | 1 | # | ob  |
| 3574 | 22 | 4 | -1.050000 | -11.335294487 | 19.499100680  | 1.033631378  | 1 | 0 | 1 | # | ob  |
| 3575 | 22 | 4 | -1.050000 | -15.376589092 | 24.133139700  | 3.233079711  | 1 | 0 | 1 | # | ob  |
| 3576 | 22 | 4 | -1.050000 | -11.960435345 | 23.950251481  | -1.033422068 | 1 | 0 | 1 | # | ob  |
| 3577 | 22 | 4 | -1.050000 | -13.094932736 | 19.668746126  | -3.231846262 | 1 | 0 | 1 | # | ob  |
| 3578 | 22 | 8 | 2.100000  | -11.307102986 | 19.345319204  | 2.662777170  | 1 | 0 | 1 | # | st  |
| 3579 | 22 | 8 | 2.100000  | -11.988072226 | 23.791570782  | -2.661798097 | 1 | 0 | 1 | # | st  |
| 3580 | 22 | 8 | 2.100000  | -14.576397014 | 25.200180796  | -2.662777170 | 1 | 0 | 1 | # | st  |
| 3581 | 22 | 8 | 2.100000  | -11.988047014 | 20.745630796  | -2.662777170 | 1 | 0 | 1 | # | st  |
| 3582 | 22 | 8 | 2.100000  | -11.307077774 | 25.208479218  | 2.661798097  | 1 | 0 | 1 | # | st  |
| 3583 | 22 | 8 | 2.100000  | -13.895427774 | 20.753929218  | 2.661798097  | 1 | 0 | 1 | # | st  |
| 3584 | 22 | 8 | 2.100000  | -13.895452986 | 23.799869204  | 2.662777170  | 1 | 0 | 1 | # | st  |
| 3585 | 22 | 8 | 2.100000  | -14.576422226 | 19.337020782  | -2.661798097 | 1 | 0 | 1 | # | st  |
| 3586 | 22 | 1 | 1.575000  | -12.941544971 | -27.43438432  | 0.000270632  | 1 | 1 | 1 | # | ao  |
| 3587 | 22 | 1 | 1.575000  | -15.529894971 | -22.979888432 | 0.000270632  | 1 | 1 | 1 | # | ao  |
| 3588 | 22 | 1 | 1.575000  | -12.941955029 | -21.474661568 | -0.000270632 | 1 | 1 | 1 | # | ao  |
| 3589 | 22 | 1 | 1.575000  | -10.353605029 | -25.929211568 | -0.000270632 | 1 | 1 | 1 | # | ao  |
| 3590 | 22 | 2 | 0.425000  | -11.795449128 | -24.451832678 | 1.486115063  | 1 | 1 | 1 | # | ho  |
| 3591 | 22 | 2 | 0.425000  | -14.383799128 | 26.730017322  | 1.486115063  | 1 | 0 | 1 | # | ho  |
| 3592 | 22 | 2 | 0.425000  | -14.088050872 | -24.457267322 | -1.486115063 | 1 | 1 | 1 | # | ho  |
| 3593 | 22 | 3 | 0.425000  | -11.499700872 | -20.002717322 | -1.486115063 | 1 | 1 | 1 | # | do  |
| 3594 | 22 | 4 | -1.050000 | -14.548785345 | -27.231598519 | -1.033422068 | 1 | 1 | 1 | # | ob  |
| 3595 | 22 | 4 | -1.050000 | -10.506582736 | -22.604003874 | -3.231846262 | 1 | 1 | 1 | # | ob  |
| 3596 | 22 | 4 | -1.050000 | -11.959855513 | -26.135450680 | -1.033631378 | 1 | 1 | 1 | # | ob  |
| 3597 | 22 | 4 | -1.050000 | -13.095260908 | -21.860389700 | -3.233079711 | 1 | 1 | 1 | # | ob  |
| 3598 | 22 | 4 | -1.050000 | -14.548205513 | -21.680900680 | -1.033631378 | 1 | 1 | 1 | # | ob  |
| 3599 | 22 | 4 | -1.050000 | -13.923644487 | -22.773649320 | 1.033631378  | 1 | 1 | 1 | # | ob  |
| 3600 | 22 | 4 | -1.050000 | -10.506910908 | -26.314939700 | -3.233079711 | 1 | 1 | 1 | # | ob  |
| 3601 | 22 | 4 | -1.050000 | -13.923064655 | -26.132051481 | 1.033422068  | 1 | 1 | 1 | # | ob  |
| 3602 | 22 | 4 | -1.050000 | -12.788567264 | -21.850546126 | 3.231846262  | 1 | 1 | 1 | # | ob  |
| 3603 | 22 | 4 | -1.050000 | -11.334714655 | -21.677501481 | 1.033422068  | 1 | 1 | 1 | # | ob  |
| 3604 | 22 | 4 | -1.050000 | -15.376917264 | -26.305096126 | 3.231846262  | 1 | 1 | 1 | # | ob  |
| 3605 | 22 | 4 | -1.050000 | -12.788239092 | -27.048710300 | 3.233079711  | 1 | 1 | 1 | # | ob  |
| 3606 | 22 | 7 | -0.950000 | -13.530842343 | 26.728240996  | 1.012582885  | 1 | 0 | 1 | # | oh  |
| 3607 | 22 | 4 | -1.050000 | -10.863018349 | 26.731276970  | 3.061482417  | 1 | 0 | 1 | # | ob  |
| 3608 | 22 | 7 | -0.950000 | -10.942492343 | -24.453609004 | 1.012582885  | 1 | 1 | 1 | # | oh  |
| 3609 | 22 | 4 | -1.050000 | -13.451368349 | -24.450573030 | 3.061482417  | 1 | 1 | 1 | # | ob  |
| 3610 | 22 | 5 | -0.950000 | -12.352657657 | -20.000940996 | -1.012582885 | 1 | 1 | 1 | # | oho |
| 3611 | 22 | 6 | -0.950000 | -15.020481651 | -20.003976970 | -3.061482417 | 1 | 1 | 1 | # | oht |
| 3612 | 22 | 7 | -0.950000 | -14.941007657 | -24.455490996 | -1.012582885 | 1 | 1 | 1 | # | oh  |
| 3613 | 22 | 4 | -1.050000 | -12.432131651 | -24.458526970 | -3.061482417 | 1 | 1 | 1 | # | ob  |
| 3614 | 22 | 4 | -1.050000 | -11.335294487 | -27.228199320 | 1.033631378  | 1 | 1 | 1 | # | ob  |
| 3615 | 22 | 4 | -1.050000 | -15.376589092 | -22.594160300 | 3.233079711  | 1 | 1 | 1 | # | ob  |
| 3616 | 22 | 4 | -1.050000 | -11.960435345 | -22.777048519 | -1.033422068 | 1 | 1 | 1 | # | ob  |
| 3617 | 22 | 4 | -1.050000 | -13.094932736 | -27.058553874 | -3.231846262 | 1 | 1 | 1 | # | ob  |
| 3618 | 22 | 8 | 2.100000  | -11.307102986 | -27.381980796 | 2.662777170  | 1 | 1 | 1 | # | st  |
| 3619 | 22 | 8 | 2.100000  | -11.988072226 | -22.935729218 | -2.661798097 | 1 | 1 | 1 | # | st  |



|      |    |   |           |               |               |              |   |   |   |   |     |
|------|----|---|-----------|---------------|---------------|--------------|---|---|---|---|-----|
| 3620 | 22 | 8 | 2.100000  | -14.576397014 | -21.527119204 | -2.662777170 | 1 | 1 | 1 | # | st  |
| 3621 | 22 | 8 | 2.100000  | -11.988047014 | -25.981669204 | -2.662777170 | 1 | 1 | 1 | # | st  |
| 3622 | 22 | 8 | 2.100000  | -11.307077774 | -21.518820782 | 2.661798097  | 1 | 1 | 1 | # | st  |
| 3623 | 22 | 8 | 2.100000  | -13.895427774 | -25.973370782 | 2.661798097  | 1 | 1 | 1 | # | st  |
| 3624 | 22 | 8 | 2.100000  | -13.895452986 | -22.927430796 | 2.662777170  | 1 | 1 | 1 | # | st  |
| 3625 | 22 | 8 | 2.100000  | -14.576422226 | -27.390279218 | -2.661798097 | 1 | 1 | 1 | # | st  |
| 3626 | 23 | 1 | 1.575000  | -7.764844971  | 1.474661568   | 0.000270632  | 1 | 0 | 1 | # | ao  |
| 3627 | 23 | 1 | 1.575000  | -10.353194971 | 5.929211568   | 0.000270632  | 1 | 0 | 1 | # | ao  |
| 3628 | 23 | 1 | 1.575000  | -7.765255029  | 7.434438432   | -0.000270632 | 1 | 0 | 1 | # | ao  |
| 3629 | 23 | 1 | 1.575000  | -5.176905029  | 2.979888432   | -0.000270632 | 1 | 0 | 1 | # | ao  |
| 3630 | 23 | 2 | 0.425000  | -6.618749128  | 4.457267322   | 1.486115063  | 1 | 0 | 1 | # | ho  |
| 3631 | 23 | 3 | 0.425000  | -9.207099128  | 0.002717322   | 1.486115063  | 1 | 0 | 1 | # | do  |
| 3632 | 23 | 2 | 0.425000  | -8.911350872  | 4.451832678   | -1.486115063 | 1 | 0 | 1 | # | ho  |
| 3633 | 23 | 2 | 0.425000  | -6.323000872  | 8.906382678   | -1.486115063 | 1 | 0 | 1 | # | ho  |
| 3634 | 23 | 4 | -1.050000 | -9.372085345  | 1.677501481   | -1.033422068 | 1 | 0 | 1 | # | ob  |
| 3635 | 23 | 4 | -1.050000 | -5.329882736  | 6.305096126   | -3.231846262 | 1 | 0 | 1 | # | ob  |
| 3636 | 23 | 4 | -1.050000 | -6.783155513  | 2.773649320   | -1.033631378 | 1 | 0 | 1 | # | ob  |
| 3637 | 23 | 4 | -1.050000 | -7.918560908  | 7.048710300   | -3.233079711 | 1 | 0 | 1 | # | ob  |
| 3638 | 23 | 4 | -1.050000 | -9.371505513  | 7.228199320   | -1.033631378 | 1 | 0 | 1 | # | ob  |
| 3639 | 23 | 4 | -1.050000 | -8.746944487  | 6.135450680   | 1.033631378  | 1 | 0 | 1 | # | ob  |
| 3640 | 23 | 4 | -1.050000 | -5.330210908  | 2.594160300   | -3.233079711 | 1 | 0 | 1 | # | ob  |
| 3641 | 23 | 4 | -1.050000 | -8.746364655  | 2.777048519   | 1.033422068  | 1 | 0 | 1 | # | ob  |
| 3642 | 23 | 4 | -1.050000 | -7.611867264  | 7.058553874   | 3.231846262  | 1 | 0 | 1 | # | ob  |
| 3643 | 23 | 4 | -1.050000 | -6.158014655  | 7.231598519   | 1.033422068  | 1 | 0 | 1 | # | ob  |
| 3644 | 23 | 4 | -1.050000 | -10.200217264 | 2.604003874   | 3.231846262  | 1 | 0 | 1 | # | ob  |
| 3645 | 23 | 4 | -1.050000 | -7.611539092  | 1.860389700   | 3.233079711  | 1 | 0 | 1 | # | ob  |
| 3646 | 23 | 5 | -0.950000 | -8.354142343  | 0.000940996   | 1.012582885  | 1 | 0 | 1 | # | oho |
| 3647 | 23 | 6 | -0.950000 | -5.686318349  | 0.003976970   | 3.061482417  | 1 | 0 | 1 | # | oht |
| 3648 | 23 | 7 | -0.950000 | -5.765792343  | 4.455490996   | 1.012582885  | 1 | 0 | 1 | # | oh  |
| 3649 | 23 | 4 | -1.050000 | -8.274668349  | 4.458526970   | 3.061482417  | 1 | 0 | 1 | # | ob  |
| 3650 | 23 | 7 | -0.950000 | -7.175957657  | 8.908159004   | -1.012582885 | 1 | 0 | 1 | # | oh  |
| 3651 | 23 | 4 | -1.050000 | -9.843781651  | 8.905123030   | -3.061482417 | 1 | 0 | 1 | # | ob  |
| 3652 | 23 | 7 | -0.950000 | -9.764307657  | 4.453609004   | -1.012582885 | 1 | 0 | 1 | # | oh  |
| 3653 | 23 | 4 | -1.050000 | -7.255431651  | 4.450573030   | -3.061482417 | 1 | 0 | 1 | # | ob  |
| 3654 | 23 | 4 | -1.050000 | -6.158594487  | 1.680900680   | 1.033631378  | 1 | 0 | 1 | # | ob  |
| 3655 | 23 | 4 | -1.050000 | -10.199889092 | 6.314939700   | 3.233079711  | 1 | 0 | 1 | # | ob  |
| 3656 | 23 | 4 | -1.050000 | -6.783735345  | 6.132051481   | -1.033422068 | 1 | 0 | 1 | # | ob  |
| 3657 | 23 | 4 | -1.050000 | -7.918232736  | 1.850546126   | -3.231846262 | 1 | 0 | 1 | # | ob  |
| 3658 | 23 | 8 | 2.100000  | -6.130402986  | 1.527119204   | 2.662777170  | 1 | 0 | 1 | # | st  |
| 3659 | 23 | 8 | 2.100000  | -6.811372226  | 5.973370782   | -2.661798097 | 1 | 0 | 1 | # | st  |
| 3660 | 23 | 8 | 2.100000  | -9.399697014  | 7.381980796   | -2.662777170 | 1 | 0 | 1 | # | st  |
| 3661 | 23 | 8 | 2.100000  | -6.811347014  | 2.927430796   | -2.662777170 | 1 | 0 | 1 | # | st  |
| 3662 | 23 | 8 | 2.100000  | -6.130377774  | 7.390279218   | 2.661798097  | 1 | 0 | 1 | # | st  |
| 3663 | 23 | 8 | 2.100000  | -8.718727774  | 2.935729218   | 2.661798097  | 1 | 0 | 1 | # | st  |
| 3664 | 23 | 8 | 2.100000  | -8.718752986  | 5.981669204   | 2.662777170  | 1 | 0 | 1 | # | st  |
| 3665 | 23 | 8 | 2.100000  | -9.399722226  | 1.518820782   | -2.661798097 | 1 | 0 | 1 | # | st  |
| 3666 | 23 | 1 | 1.575000  | -7.764844971  | 10.383761568  | 0.000270632  | 1 | 0 | 1 | # | ao  |
| 3667 | 23 | 1 | 1.575000  | -10.353194971 | 14.838311568  | 0.000270632  | 1 | 0 | 1 | # | ao  |
| 3668 | 23 | 1 | 1.575000  | -7.765255029  | 16.343538432  | -0.000270632 | 1 | 0 | 1 | # | ao  |
| 3669 | 23 | 1 | 1.575000  | -5.176905029  | 11.888988432  | -0.000270632 | 1 | 0 | 1 | # | ao  |
| 3670 | 23 | 2 | 0.425000  | -6.618749128  | 13.366367322  | 1.486115063  | 1 | 0 | 1 | # | ho  |
| 3671 | 23 | 2 | 0.425000  | -9.207099128  | 8.911817322   | 1.486115063  | 1 | 0 | 1 | # | ho  |
| 3672 | 23 | 2 | 0.425000  | -8.911350872  | 13.360932678  | -1.486115063 | 1 | 0 | 1 | # | ho  |
| 3673 | 23 | 2 | 0.425000  | -6.323000872  | 17.815482678  | -1.486115063 | 1 | 0 | 1 | # | ho  |
| 3674 | 23 | 4 | -1.050000 | -9.372085345  | 10.586601481  | -1.033422068 | 1 | 0 | 1 | # | ob  |
| 3675 | 23 | 4 | -1.050000 | -5.329882736  | 15.214196126  | -3.231846262 | 1 | 0 | 1 | # | ob  |
| 3676 | 23 | 4 | -1.050000 | -6.783155513  | 11.682749320  | -1.033631378 | 1 | 0 | 1 | # | ob  |
| 3677 | 23 | 4 | -1.050000 | -7.918560908  | 15.957810300  | -3.233079711 | 1 | 0 | 1 | # | ob  |
| 3678 | 23 | 4 | -1.050000 | -9.371505513  | 16.137299320  | -1.033631378 | 1 | 0 | 1 | # | ob  |
| 3679 | 23 | 4 | -1.050000 | -8.746944487  | 15.044550680  | 1.033631378  | 1 | 0 | 1 | # | ob  |
| 3680 | 23 | 4 | -1.050000 | -5.330210908  | 11.503260300  | -3.233079711 | 1 | 0 | 1 | # | ob  |
| 3681 | 23 | 4 | -1.050000 | -8.746364655  | 11.686148519  | 1.033422068  | 1 | 0 | 1 | # | ob  |
| 3682 | 23 | 4 | -1.050000 | -7.611867264  | 15.967653874  | 3.231846262  | 1 | 0 | 1 | # | ob  |
| 3683 | 23 | 4 | -1.050000 | -6.158014655  | 16.140698519  | 1.033422068  | 1 | 0 | 1 | # | ob  |
| 3684 | 23 | 4 | -1.050000 | -10.200217264 | 11.513103874  | 3.231846262  | 1 | 0 | 1 | # | ob  |
| 3685 | 23 | 4 | -1.050000 | -7.611539092  | 10.769489700  | 3.233079711  | 1 | 0 | 1 | # | ob  |
| 3686 | 23 | 7 | -0.950000 | -8.354142343  | 8.910040996   | 1.012582885  | 1 | 0 | 1 | # | oh  |
| 3687 | 23 | 4 | -1.050000 | -5.686318349  | 8.913076970   | 3.061482417  | 1 | 0 | 1 | # | ob  |
| 3688 | 23 | 7 | -0.950000 | -5.765792343  | 13.364590996  | 1.012582885  | 1 | 0 | 1 | # | oh  |
| 3689 | 23 | 4 | -1.050000 | -8.274668349  | 13.367626970  | 3.061482417  | 1 | 0 | 1 | # | ob  |
| 3690 | 23 | 7 | -0.950000 | -7.175957657  | 17.817259004  | -1.012582885 | 1 | 0 | 1 | # | oh  |
| 3691 | 23 | 4 | -1.050000 | -9.843781651  | 17.814223030  | -3.061482417 | 1 | 0 | 1 | # | ob  |
| 3692 | 23 | 7 | -0.950000 | -9.764307657  | 13.362709004  | -1.012582885 | 1 | 0 | 1 | # | oh  |
| 3693 | 23 | 4 | -1.050000 | -7.255431651  | 13.359673030  | -3.061482417 | 1 | 0 | 1 | # | ob  |
| 3694 | 23 | 4 | -1.050000 | -6.158594487  | 10.590000680  | 1.033631378  | 1 | 0 | 1 | # | ob  |
| 3695 | 23 | 4 | -1.050000 | -10.199889092 | 15.224039700  | 3.233079711  | 1 | 0 | 1 | # | ob  |
| 3696 | 23 | 4 | -1.050000 | -6.783735345  | 15.041151481  | -1.033422068 | 1 | 0 | 1 | # | ob  |
| 3697 | 23 | 4 | -1.050000 | -7.918232736  | 10.759646126  | -3.231846262 | 1 | 0 | 1 | # | ob  |
| 3698 | 23 | 8 | 2.100000  | -6.130402986  | 10.436219204  | 2.662777170  | 1 | 0 | 1 | # | st  |
| 3699 | 23 | 8 | 2.100000  | -6.811372226  | 14.882470782  | -2.661798097 | 1 | 0 | 1 | # | st  |
| 3700 | 23 | 8 | 2.100000  | -9.399697014  | 16.291080796  | -2.662777170 | 1 | 0 | 1 | # | st  |
| 3701 | 23 | 8 | 2.100000  | -6.811347014  | 11.836530796  | -2.662777170 | 1 | 0 | 1 | # | st  |
| 3702 | 23 | 8 | 2.100000  | -6.130377774  | 16.299379218  | 2.661798097  | 1 | 0 | 1 | # | st  |
| 3703 | 23 | 8 | 2.100000  | -8.718727774  | 11.844829218  | 2.661798097  | 1 | 0 | 1 | # | st  |
| 3704 | 23 | 8 | 2.100000  | -8.718752986  | 14.890769204  | 2.662777170  | 1 | 0 | 1 | # | st  |
| 3705 | 23 | 8 | 2.100000  | -9.399722226  | 10.427920782  | -2.661798097 | 1 | 0 | 1 | # | st  |
| 3706 | 23 | 1 | 1.575000  | -7.764844971  | 19.292861568  | 0.000270632  | 1 | 0 | 1 | # | ao  |
| 3707 | 23 | 1 | 1.575000  | -10.353194971 | 23.747411568  | 0.000270632  | 1 | 0 | 1 | # | ao  |
| 3708 | 23 | 1 | 1.575000  | -7.765255029  | 25.252638432  | -0.000270632 | 1 | 0 | 1 | # | ao  |
| 3709 | 23 | 1 | 1.575000  | -5.176905029  | 20.798088432  | -0.000270632 | 1 | 0 | 1 | # | ao  |
| 3710 | 23 | 2 | 0.425000  | -6.618749128  | 22.275467322  | 1.486115063  | 1 | 0 | 1 | # | ho  |
| 3711 | 23 | 2 | 0.425000  | -9.207099128  | 17.820917322  | 1.486115063  | 1 | 0 | 1 | # | ho  |
| 3712 | 23 | 2 | 0.425000  | -8.911350872  | 22.270032678  | -1.486115063 | 1 | 0 | 1 | # | ho  |

|      |    |   |           |               |               |              |   |   |   |   |     |
|------|----|---|-----------|---------------|---------------|--------------|---|---|---|---|-----|
| 3713 | 23 | 2 | 0.425000  | -6.323000872  | 26.724582678  | -1.486115063 | 1 | 0 | 1 | # | ho  |
| 3714 | 23 | 4 | -1.050000 | -9.372085345  | 19.495701481  | -1.033422068 | 1 | 0 | 1 | # | ob  |
| 3715 | 23 | 4 | -1.050000 | -5.329882736  | 24.123296126  | -3.231846262 | 1 | 0 | 1 | # | ob  |
| 3716 | 23 | 4 | -1.050000 | -6.783155513  | 20.591849320  | -1.033631378 | 1 | 0 | 1 | # | ob  |
| 3717 | 23 | 4 | -1.050000 | -7.918560908  | 24.866910300  | -3.233079711 | 1 | 0 | 1 | # | ob  |
| 3718 | 23 | 4 | -1.050000 | -9.371505513  | 25.046399320  | -1.033631378 | 1 | 0 | 1 | # | ob  |
| 3719 | 23 | 4 | -1.050000 | -8.746944487  | 23.953650680  | 1.033631378  | 1 | 0 | 1 | # | ob  |
| 3720 | 23 | 4 | -1.050000 | -5.330210908  | 20.412360300  | -3.233079711 | 1 | 0 | 1 | # | ob  |
| 3721 | 23 | 4 | -1.050000 | -8.746364655  | 20.595248519  | 1.033422068  | 1 | 0 | 1 | # | ob  |
| 3722 | 23 | 4 | -1.050000 | -7.611867264  | 24.876753874  | 3.231846262  | 1 | 0 | 1 | # | ob  |
| 3723 | 23 | 4 | -1.050000 | -6.158014655  | 25.049798519  | 1.033422068  | 1 | 0 | 1 | # | ob  |
| 3724 | 23 | 4 | -1.050000 | -10.200217264 | 20.422203874  | 3.231846262  | 1 | 0 | 1 | # | ob  |
| 3725 | 23 | 4 | -1.050000 | -7.611539092  | 19.678589700  | 3.233079711  | 1 | 0 | 1 | # | ob  |
| 3726 | 23 | 7 | -0.950000 | -8.354142343  | 17.819140996  | 1.012582885  | 1 | 0 | 1 | # | oh  |
| 3727 | 23 | 4 | -1.050000 | -5.686318349  | 17.822176970  | 3.061482417  | 1 | 0 | 1 | # | ob  |
| 3728 | 23 | 7 | -0.950000 | -5.765792343  | 22.273690996  | 1.012582885  | 1 | 0 | 1 | # | oh  |
| 3729 | 23 | 4 | -1.050000 | -8.274668349  | 22.276726970  | 3.061482417  | 1 | 0 | 1 | # | ob  |
| 3730 | 23 | 7 | -0.950000 | -7.175957657  | 26.726359004  | -1.012582885 | 1 | 0 | 1 | # | oh  |
| 3731 | 23 | 4 | -1.050000 | -9.843781651  | 26.723323030  | -3.061482417 | 1 | 0 | 1 | # | ob  |
| 3732 | 23 | 7 | -0.950000 | -9.764307657  | 22.271809004  | -1.012582885 | 1 | 0 | 1 | # | oh  |
| 3733 | 23 | 4 | -1.050000 | -7.255431651  | 22.268773030  | -3.061482417 | 1 | 0 | 1 | # | ob  |
| 3734 | 23 | 4 | -1.050000 | -6.158594487  | 19.499100680  | 1.033631378  | 1 | 0 | 1 | # | ob  |
| 3735 | 23 | 4 | -1.050000 | -10.199889092 | 24.133139700  | 3.233079711  | 1 | 0 | 1 | # | ob  |
| 3736 | 23 | 4 | -1.050000 | -6.783735345  | 23.950251481  | -1.033422068 | 1 | 0 | 1 | # | ob  |
| 3737 | 23 | 4 | -1.050000 | -7.918232736  | 19.668746126  | -3.231846262 | 1 | 0 | 1 | # | ob  |
| 3738 | 23 | 8 | 2.100000  | -6.130402986  | 19.345319204  | 2.662777170  | 1 | 0 | 1 | # | st  |
| 3739 | 23 | 8 | 2.100000  | -6.811372226  | 23.791570782  | -2.661798097 | 1 | 0 | 1 | # | st  |
| 3740 | 23 | 8 | 2.100000  | -9.399697014  | 25.200180796  | -2.662777170 | 1 | 0 | 1 | # | st  |
| 3741 | 23 | 8 | 2.100000  | -6.811347014  | 20.745630796  | -2.662777170 | 1 | 0 | 1 | # | st  |
| 3742 | 23 | 8 | 2.100000  | -6.130377774  | 25.208479218  | 2.661798097  | 1 | 0 | 1 | # | st  |
| 3743 | 23 | 8 | 2.100000  | -8.718727774  | 20.753929218  | 2.661798097  | 1 | 0 | 1 | # | st  |
| 3744 | 23 | 8 | 2.100000  | -8.718752986  | 23.799869204  | 2.662777170  | 1 | 0 | 1 | # | st  |
| 3745 | 23 | 8 | 2.100000  | -9.399722226  | 19.337020782  | -2.661798097 | 1 | 0 | 1 | # | st  |
| 3746 | 23 | 1 | 1.575000  | -7.764844971  | -27.434438432 | 0.000270632  | 1 | 1 | 1 | # | ao  |
| 3747 | 23 | 1 | 1.575000  | -10.353194971 | -22.979888432 | 0.000270632  | 1 | 1 | 1 | # | ao  |
| 3748 | 23 | 1 | 1.575000  | -7.765255029  | -21.474661568 | -0.000270632 | 1 | 1 | 1 | # | ao  |
| 3749 | 23 | 1 | 1.575000  | -5.176905029  | -25.929211568 | -0.000270632 | 1 | 1 | 1 | # | ao  |
| 3750 | 23 | 2 | 0.425000  | -6.618749128  | -24.451832678 | 1.486115063  | 1 | 1 | 1 | # | ho  |
| 3751 | 23 | 2 | 0.425000  | -9.207099128  | 26.730017322  | 1.486115063  | 1 | 0 | 1 | # | ho  |
| 3752 | 23 | 2 | 0.425000  | -8.911350872  | -24.457267322 | -1.486115063 | 1 | 1 | 1 | # | ho  |
| 3753 | 23 | 3 | 0.425000  | -6.323000872  | -20.002717322 | -1.486115063 | 1 | 1 | 1 | # | do  |
| 3754 | 23 | 4 | -1.050000 | -9.372085345  | -27.231598519 | -1.033422068 | 1 | 1 | 1 | # | ob  |
| 3755 | 23 | 4 | -1.050000 | -5.329882736  | -22.604003874 | -3.231846262 | 1 | 1 | 1 | # | ob  |
| 3756 | 23 | 4 | -1.050000 | -6.783155513  | -26.135450680 | -1.033631378 | 1 | 1 | 1 | # | ob  |
| 3757 | 23 | 4 | -1.050000 | -7.918560908  | -21.860389700 | -3.233079711 | 1 | 1 | 1 | # | ob  |
| 3758 | 23 | 4 | -1.050000 | -9.371505513  | -21.680900680 | -1.033631378 | 1 | 1 | 1 | # | ob  |
| 3759 | 23 | 4 | -1.050000 | -8.746944487  | -22.773649320 | 1.033631378  | 1 | 1 | 1 | # | ob  |
| 3760 | 23 | 4 | -1.050000 | -5.330210908  | -26.314939700 | -3.233079711 | 1 | 1 | 1 | # | ob  |
| 3761 | 23 | 4 | -1.050000 | -8.746364655  | -26.132051481 | 1.033422068  | 1 | 1 | 1 | # | ob  |
| 3762 | 23 | 4 | -1.050000 | -7.611867264  | -21.850546126 | 3.231846262  | 1 | 1 | 1 | # | ob  |
| 3763 | 23 | 4 | -1.050000 | -6.158014655  | -21.677501481 | 1.033422068  | 1 | 1 | 1 | # | ob  |
| 3764 | 23 | 4 | -1.050000 | -10.200217264 | -26.305096126 | 3.231846262  | 1 | 1 | 1 | # | ob  |
| 3765 | 23 | 4 | -1.050000 | -7.611539092  | -27.048710300 | 3.233079711  | 1 | 1 | 1 | # | ob  |
| 3766 | 23 | 7 | -0.950000 | -8.354142343  | 26.728240996  | 1.012582885  | 1 | 0 | 1 | # | oh  |
| 3767 | 23 | 4 | -1.050000 | -5.686318349  | 26.731276970  | 3.061482417  | 1 | 0 | 1 | # | ob  |
| 3768 | 23 | 7 | -0.950000 | -5.765792343  | -24.453609004 | 1.012582885  | 1 | 1 | 1 | # | oh  |
| 3769 | 23 | 4 | -1.050000 | -8.274668349  | -24.450573030 | 3.061482417  | 1 | 1 | 1 | # | ob  |
| 3770 | 23 | 5 | -0.950000 | -7.175957657  | -20.000940996 | -1.012582885 | 1 | 1 | 1 | # | oho |
| 3771 | 23 | 6 | -0.950000 | -9.843781651  | -20.003976970 | -3.061482417 | 1 | 1 | 1 | # | oht |
| 3772 | 23 | 7 | -0.950000 | -9.764307657  | -24.455490996 | -1.012582885 | 1 | 1 | 1 | # | oh  |
| 3773 | 23 | 4 | -1.050000 | -7.255431651  | -24.458526970 | -3.061482417 | 1 | 1 | 1 | # | ob  |
| 3774 | 23 | 4 | -1.050000 | -6.158594487  | -27.228199320 | 1.033631378  | 1 | 1 | 1 | # | ob  |
| 3775 | 23 | 4 | -1.050000 | -10.199889092 | -22.594160300 | 3.233079711  | 1 | 1 | 1 | # | ob  |
| 3776 | 23 | 4 | -1.050000 | -6.783735345  | -22.777048519 | -1.033422068 | 1 | 1 | 1 | # | ob  |
| 3777 | 23 | 4 | -1.050000 | -7.918232736  | -27.058553874 | -3.231846262 | 1 | 1 | 1 | # | ob  |
| 3778 | 23 | 8 | 2.100000  | -6.130402986  | -27.381980796 | 2.662777170  | 1 | 1 | 1 | # | st  |
| 3779 | 23 | 8 | 2.100000  | -6.811372226  | -22.935729218 | -2.661798097 | 1 | 1 | 1 | # | st  |
| 3780 | 23 | 8 | 2.100000  | -9.399697014  | -21.527119204 | -2.662777170 | 1 | 1 | 1 | # | st  |
| 3781 | 23 | 8 | 2.100000  | -6.811347014  | -25.981669204 | -2.662777170 | 1 | 1 | 1 | # | st  |
| 3782 | 23 | 8 | 2.100000  | -6.130377774  | -21.518820782 | 2.661798097  | 1 | 1 | 1 | # | st  |
| 3783 | 23 | 8 | 2.100000  | -8.718727774  | -25.973370782 | 2.661798097  | 1 | 1 | 1 | # | st  |
| 3784 | 23 | 8 | 2.100000  | -8.718752986  | -22.927430796 | 2.662777170  | 1 | 1 | 1 | # | st  |
| 3785 | 23 | 8 | 2.100000  | -9.399722226  | -27.390279218 | -2.661798097 | 1 | 1 | 1 | # | st  |
| 3786 | 24 | 1 | 1.575000  | -2.588144971  | 1.474661568   | 0.000270632  | 1 | 0 | 1 | # | ao  |
| 3787 | 24 | 1 | 1.575000  | -5.176494971  | 5.929211568   | 0.000270632  | 1 | 0 | 1 | # | ao  |
| 3788 | 24 | 1 | 1.575000  | -2.588555029  | 7.434438432   | -0.000270632 | 1 | 0 | 1 | # | ao  |
| 3789 | 24 | 1 | 1.575000  | -0.000205029  | 2.979888432   | -0.000270632 | 1 | 0 | 1 | # | ao  |
| 3790 | 24 | 2 | 0.425000  | -1.442049128  | 4.457267322   | 1.486115063  | 1 | 0 | 1 | # | ho  |
| 3791 | 24 | 3 | 0.425000  | -4.030399128  | 0.002717322   | 1.486115063  | 1 | 0 | 1 | # | do  |
| 3792 | 24 | 2 | 0.425000  | -3.734650872  | 4.451832678   | -1.486115063 | 1 | 0 | 1 | # | ho  |
| 3793 | 24 | 2 | 0.425000  | -1.146300872  | 8.906382678   | -1.486115063 | 1 | 0 | 1 | # | ho  |
| 3794 | 24 | 4 | -1.050000 | -4.195385345  | 1.677501481   | -1.033422068 | 1 | 0 | 1 | # | ob  |
| 3795 | 24 | 4 | -1.050000 | -0.153182736  | 6.305096126   | -3.231846262 | 1 | 0 | 1 | # | ob  |
| 3796 | 24 | 4 | -1.050000 | -1.606455513  | 2.773649320   | -1.033631378 | 1 | 0 | 1 | # | ob  |
| 3797 | 24 | 4 | -1.050000 | -2.741860908  | 7.048710300   | -3.233079711 | 1 | 0 | 1 | # | ob  |
| 3798 | 24 | 4 | -1.050000 | -4.194805513  | 7.228199320   | -1.033631378 | 1 | 0 | 1 | # | ob  |
| 3799 | 24 | 4 | -1.050000 | -3.570244487  | 6.135450680   | 1.033631378  | 1 | 0 | 1 | # | ob  |
| 3800 | 24 | 4 | -1.050000 | -0.153510908  | 2.594160300   | -3.233079711 | 1 | 0 | 1 | # | ob  |
| 3801 | 24 | 4 | -1.050000 | -3.569664655  | 2.777048519   | 1.033422068  | 1 | 0 | 1 | # | ob  |
| 3802 | 24 | 4 | -1.050000 | -2.435167264  | 7.058553874   | 3.231846262  | 1 | 0 | 1 | # | ob  |
| 3803 | 24 | 4 | -1.050000 | -0.981314655  | 7.231598519   | 1.033422068  | 1 | 0 | 1 | # | ob  |
| 3804 | 24 | 4 | -1.050000 | -5.023517264  | 2.604003874   | 3.231846262  | 1 | 0 | 1 | # | ob  |
| 3805 | 24 | 4 | -1.050000 | -2.434839092  | 1.860389700   | 3.233079711  | 1 | 0 | 1 | # | ob  |

|      |    |   |           |              |              |              |   |   |   |   |     |
|------|----|---|-----------|--------------|--------------|--------------|---|---|---|---|-----|
| 3806 | 24 | 5 | -0.950000 | -3.177442343 | 0.000940996  | 1.012582885  | 1 | 0 | 1 | # | oho |
| 3807 | 24 | 6 | -0.950000 | -0.509618349 | 0.003976970  | 3.061482417  | 1 | 0 | 1 | # | oht |
| 3808 | 24 | 7 | -0.950000 | -0.589092343 | 4.455490996  | 1.012582885  | 1 | 0 | 1 | # | oh  |
| 3809 | 24 | 4 | -1.050000 | -3.097968349 | 4.458526970  | 3.061482417  | 1 | 0 | 1 | # | ob  |
| 3810 | 24 | 7 | -0.950000 | -1.999257657 | 8.908159004  | -1.012582885 | 1 | 0 | 1 | # | oh  |
| 3811 | 24 | 4 | -1.050000 | -4.667081651 | 8.905123030  | -3.061482417 | 1 | 0 | 1 | # | ob  |
| 3812 | 24 | 7 | -0.950000 | -4.587607657 | 4.453609004  | -1.012582885 | 1 | 0 | 1 | # | oh  |
| 3813 | 24 | 4 | -1.050000 | -2.078731651 | 4.450573030  | -3.061482417 | 1 | 0 | 1 | # | ob  |
| 3814 | 24 | 4 | -1.050000 | -0.981894487 | 1.680900680  | 1.033631378  | 1 | 0 | 1 | # | ob  |
| 3815 | 24 | 4 | -1.050000 | -5.023189092 | 6.314939700  | 3.233079711  | 1 | 0 | 1 | # | ob  |
| 3816 | 24 | 4 | -1.050000 | -1.607035345 | 6.132051481  | -1.033422068 | 1 | 0 | 1 | # | ob  |
| 3817 | 24 | 4 | -1.050000 | -2.741532736 | 1.850546126  | -3.231846262 | 1 | 0 | 1 | # | ob  |
| 3818 | 24 | 8 | 2.100000  | -0.953702986 | 1.527119204  | 2.662777170  | 1 | 0 | 1 | # | st  |
| 3819 | 24 | 8 | 2.100000  | -1.634672226 | 5.973370782  | -2.661798097 | 1 | 0 | 1 | # | st  |
| 3820 | 24 | 8 | 2.100000  | -4.222997014 | 7.381980796  | -2.662777170 | 1 | 0 | 1 | # | st  |
| 3821 | 24 | 8 | 2.100000  | -1.634647014 | 2.927430796  | -2.662777170 | 1 | 0 | 1 | # | st  |
| 3822 | 24 | 8 | 2.100000  | -0.953677774 | 7.390279218  | 2.661798097  | 1 | 0 | 1 | # | st  |
| 3823 | 24 | 8 | 2.100000  | -3.542027774 | 2.935729218  | 2.661798097  | 1 | 0 | 1 | # | st  |
| 3824 | 24 | 8 | 2.100000  | -3.542052986 | 5.981669204  | 2.662777170  | 1 | 0 | 1 | # | st  |
| 3825 | 24 | 8 | 2.100000  | -4.223022226 | 1.518820782  | -2.661798097 | 1 | 0 | 1 | # | st  |
| 3826 | 24 | 1 | 1.575000  | -2.588144971 | 10.383761568 | 0.000270632  | 1 | 0 | 1 | # | ao  |
| 3827 | 24 | 1 | 1.575000  | -5.176494971 | 14.838311568 | 0.000270632  | 1 | 0 | 1 | # | ao  |
| 3828 | 24 | 1 | 1.575000  | -2.588555029 | 16.343538432 | -0.000270632 | 1 | 0 | 1 | # | ao  |
| 3829 | 24 | 1 | 1.575000  | -0.000205029 | 11.888988432 | -0.000270632 | 1 | 0 | 1 | # | ao  |
| 3830 | 24 | 2 | 0.425000  | -1.442049128 | 13.366367322 | 1.486115063  | 1 | 0 | 1 | # | ho  |
| 3831 | 24 | 2 | 0.425000  | -4.030399128 | 8.911817322  | 1.486115063  | 1 | 0 | 1 | # | ho  |
| 3832 | 24 | 2 | 0.425000  | -3.734650872 | 13.360932678 | -1.486115063 | 1 | 0 | 1 | # | ho  |
| 3833 | 24 | 2 | 0.425000  | -1.146300872 | 17.815482678 | -1.486115063 | 1 | 0 | 1 | # | ho  |
| 3834 | 24 | 4 | -1.050000 | -4.195385345 | 10.586601481 | -1.033422068 | 1 | 0 | 1 | # | ob  |
| 3835 | 24 | 4 | -1.050000 | -0.153182736 | 15.214196126 | -3.231846262 | 1 | 0 | 1 | # | ob  |
| 3836 | 24 | 4 | -1.050000 | -1.606455513 | 11.682749320 | -1.033631378 | 1 | 0 | 1 | # | ob  |
| 3837 | 24 | 4 | -1.050000 | -2.741860908 | 15.957810300 | -3.233079711 | 1 | 0 | 1 | # | ob  |
| 3838 | 24 | 4 | -1.050000 | -4.194805513 | 16.137299320 | -1.033631378 | 1 | 0 | 1 | # | ob  |
| 3839 | 24 | 4 | -1.050000 | -3.570244487 | 15.044550680 | 1.033631378  | 1 | 0 | 1 | # | ob  |
| 3840 | 24 | 4 | -1.050000 | -0.153510908 | 11.503260300 | -3.233079711 | 1 | 0 | 1 | # | ob  |
| 3841 | 24 | 4 | -1.050000 | -3.569664655 | 11.686148519 | 1.033422068  | 1 | 0 | 1 | # | ob  |
| 3842 | 24 | 4 | -1.050000 | -2.435167264 | 15.967653874 | 3.231846262  | 1 | 0 | 1 | # | ob  |
| 3843 | 24 | 4 | -1.050000 | -0.981314655 | 16.140698519 | 1.033422068  | 1 | 0 | 1 | # | ob  |
| 3844 | 24 | 4 | -1.050000 | -5.023517264 | 11.513103874 | 3.231846262  | 1 | 0 | 1 | # | ob  |
| 3845 | 24 | 4 | -1.050000 | -2.434839092 | 10.769489700 | 3.233079711  | 1 | 0 | 1 | # | ob  |
| 3846 | 24 | 7 | -0.950000 | -3.177442343 | 8.910040996  | 1.012582885  | 1 | 0 | 1 | # | oh  |
| 3847 | 24 | 4 | -1.050000 | -0.509618349 | 8.913076970  | 3.061482417  | 1 | 0 | 1 | # | ob  |
| 3848 | 24 | 7 | -0.950000 | -0.589092343 | 13.364590996 | 1.012582885  | 1 | 0 | 1 | # | oh  |
| 3849 | 24 | 4 | -1.050000 | -3.097968349 | 13.367626970 | 3.061482417  | 1 | 0 | 1 | # | ob  |
| 3850 | 24 | 7 | -0.950000 | -1.999257657 | 17.817259004 | -1.012582885 | 1 | 0 | 1 | # | oh  |
| 3851 | 24 | 4 | -1.050000 | -4.667081651 | 17.814223030 | -3.061482417 | 1 | 0 | 1 | # | ob  |
| 3852 | 24 | 7 | -0.950000 | -4.587607657 | 13.362709004 | -1.012582885 | 1 | 0 | 1 | # | oh  |
| 3853 | 24 | 4 | -1.050000 | -2.078731651 | 13.359673030 | -3.061482417 | 1 | 0 | 1 | # | ob  |
| 3854 | 24 | 4 | -1.050000 | -0.981894487 | 10.590000680 | 1.033631378  | 1 | 0 | 1 | # | ob  |
| 3855 | 24 | 4 | -1.050000 | -5.023189092 | 15.224039700 | 3.233079711  | 1 | 0 | 1 | # | ob  |
| 3856 | 24 | 4 | -1.050000 | -1.607035345 | 15.041151481 | -1.033422068 | 1 | 0 | 1 | # | ob  |
| 3857 | 24 | 4 | -1.050000 | -2.741532736 | 10.759646126 | -3.231846262 | 1 | 0 | 1 | # | ob  |
| 3858 | 24 | 8 | 2.100000  | -0.953702986 | 10.436219204 | 2.662777170  | 1 | 0 | 1 | # | st  |
| 3859 | 24 | 8 | 2.100000  | -1.634672226 | 14.882470782 | -2.661798097 | 1 | 0 | 1 | # | st  |
| 3860 | 24 | 8 | 2.100000  | -4.222997014 | 16.291080796 | -2.662777170 | 1 | 0 | 1 | # | st  |
| 3861 | 24 | 8 | 2.100000  | -1.634647014 | 11.836530796 | -2.662777170 | 1 | 0 | 1 | # | st  |
| 3862 | 24 | 8 | 2.100000  | -0.953677774 | 16.299379218 | 2.661798097  | 1 | 0 | 1 | # | st  |
| 3863 | 24 | 8 | 2.100000  | -3.542027774 | 11.844829218 | 2.661798097  | 1 | 0 | 1 | # | st  |
| 3864 | 24 | 8 | 2.100000  | -3.542052986 | 14.890769204 | 2.662777170  | 1 | 0 | 1 | # | st  |
| 3865 | 24 | 8 | 2.100000  | -4.223022226 | 10.427920782 | -2.661798097 | 1 | 0 | 1 | # | st  |
| 3866 | 24 | 1 | 1.575000  | -2.588144971 | 19.292861568 | 0.000270632  | 1 | 0 | 1 | # | ao  |
| 3867 | 24 | 1 | 1.575000  | -5.176494971 | 23.747411568 | 0.000270632  | 1 | 0 | 1 | # | ao  |
| 3868 | 24 | 1 | 1.575000  | -2.588555029 | 25.252638432 | -0.000270632 | 1 | 0 | 1 | # | ao  |
| 3869 | 24 | 1 | 1.575000  | -0.000205029 | 20.798088432 | -0.000270632 | 1 | 0 | 1 | # | ao  |
| 3870 | 24 | 2 | 0.425000  | -1.442049128 | 22.275467322 | 1.486115063  | 1 | 0 | 1 | # | ho  |
| 3871 | 24 | 2 | 0.425000  | -4.030399128 | 17.820917322 | 1.486115063  | 1 | 0 | 1 | # | ho  |
| 3872 | 24 | 2 | 0.425000  | -3.734650872 | 22.270032678 | -1.486115063 | 1 | 0 | 1 | # | ho  |
| 3873 | 24 | 2 | 0.425000  | -1.146300872 | 26.724582678 | -1.486115063 | 1 | 0 | 1 | # | ho  |
| 3874 | 24 | 4 | -1.050000 | -4.195385345 | 19.495701481 | -1.033422068 | 1 | 0 | 1 | # | ob  |
| 3875 | 24 | 4 | -1.050000 | -0.153182736 | 24.123296126 | -3.231846262 | 1 | 0 | 1 | # | ob  |
| 3876 | 24 | 4 | -1.050000 | -1.606455513 | 20.591849320 | -1.033631378 | 1 | 0 | 1 | # | ob  |
| 3877 | 24 | 4 | -1.050000 | -2.741860908 | 24.866910300 | -3.233079711 | 1 | 0 | 1 | # | ob  |
| 3878 | 24 | 4 | -1.050000 | -4.194805513 | 25.046399320 | -1.033631378 | 1 | 0 | 1 | # | ob  |
| 3879 | 24 | 4 | -1.050000 | -3.570244487 | 23.953650680 | 1.033631378  | 1 | 0 | 1 | # | ob  |
| 3880 | 24 | 4 | -1.050000 | -0.153510908 | 20.412360300 | -3.233079711 | 1 | 0 | 1 | # | ob  |
| 3881 | 24 | 4 | -1.050000 | -3.569664655 | 20.595248519 | 1.033422068  | 1 | 0 | 1 | # | ob  |
| 3882 | 24 | 4 | -1.050000 | -2.435167264 | 24.876753874 | 3.231846262  | 1 | 0 | 1 | # | ob  |
| 3883 | 24 | 4 | -1.050000 | -0.981314655 | 25.049798519 | 1.033422068  | 1 | 0 | 1 | # | ob  |
| 3884 | 24 | 4 | -1.050000 | -5.023517264 | 20.422203874 | 3.231846262  | 1 | 0 | 1 | # | ob  |
| 3885 | 24 | 4 | -1.050000 | -2.434839092 | 19.678589700 | 3.233079711  | 1 | 0 | 1 | # | ob  |
| 3886 | 24 | 7 | -0.950000 | -3.177442343 | 17.819140996 | 1.012582885  | 1 | 0 | 1 | # | oh  |
| 3887 | 24 | 4 | -1.050000 | -0.509618349 | 17.822176970 | 3.061482417  | 1 | 0 | 1 | # | ob  |
| 3888 | 24 | 7 | -0.950000 | -0.589092343 | 22.273690996 | 1.012582885  | 1 | 0 | 1 | # | oh  |
| 3889 | 24 | 4 | -1.050000 | -3.097968349 | 22.276726970 | 3.061482417  | 1 | 0 | 1 | # | ob  |
| 3890 | 24 | 7 | -0.950000 | -1.999257657 | 26.726359004 | -1.012582885 | 1 | 0 | 1 | # | oh  |
| 3891 | 24 | 4 | -1.050000 | -4.667081651 | 26.723323030 | -3.061482417 | 1 | 0 | 1 | # | ob  |
| 3892 | 24 | 7 | -0.950000 | -4.587607657 | 22.271809004 | -1.012582885 | 1 | 0 | 1 | # | oh  |
| 3893 | 24 | 4 | -1.050000 | -2.078731651 | 22.268773030 | -3.061482417 | 1 | 0 | 1 | # | ob  |
| 3894 | 24 | 4 | -1.050000 | -0.981894487 | 19.499100680 | 1.033631378  | 1 | 0 | 1 | # | ob  |
| 3895 | 24 | 4 | -1.050000 | -5.023189092 | 24.133139700 | 3.233079711  | 1 | 0 | 1 | # | ob  |
| 3896 | 24 | 4 | -1.050000 | -1.607035345 | 23.950251481 | -1.033422068 | 1 | 0 | 1 | # | ob  |
| 3897 | 24 | 4 | -1.050000 | -2.741532736 | 19.668746126 | -3.231846262 | 1 | 0 | 1 | # | ob  |
| 3898 | 24 | 8 | 2.100000  | -0.953702986 | 19.345319204 | 2.662777170  | 1 | 0 | 1 | # | st  |

|      |    |   |           |               |               |               |   |   |   |   |     |
|------|----|---|-----------|---------------|---------------|---------------|---|---|---|---|-----|
| 3899 | 24 | 8 | 2.100000  | -1.634672226  | 23.791570782  | -2.661798097  | 1 | 0 | 1 | # | st  |
| 3900 | 24 | 8 | 2.100000  | -4.222997014  | 25.200180796  | -2.662777170  | 1 | 0 | 1 | # | st  |
| 3901 | 24 | 8 | 2.100000  | -1.634647014  | 20.745630796  | -2.662777170  | 1 | 0 | 1 | # | st  |
| 3902 | 24 | 8 | 2.100000  | -0.953677774  | 25.208479218  | 2.661798097   | 1 | 0 | 1 | # | st  |
| 3903 | 24 | 8 | 2.100000  | -3.542027774  | 20.753929218  | 2.661798097   | 1 | 0 | 1 | # | st  |
| 3904 | 24 | 8 | 2.100000  | -3.542052986  | 23.799869204  | 2.662777170   | 1 | 0 | 1 | # | st  |
| 3905 | 24 | 8 | 2.100000  | -4.223022226  | 19.337020782  | -2.661798097  | 1 | 0 | 1 | # | st  |
| 3906 | 24 | 1 | 1.575000  | -2.588144971  | -27.434438432 | 0.000270632   | 1 | 1 | 1 | # | ao  |
| 3907 | 24 | 1 | 1.575000  | -5.176494971  | -22.979888432 | 0.000270632   | 1 | 1 | 1 | # | ao  |
| 3908 | 24 | 1 | 1.575000  | -2.588555029  | -21.474661568 | -0.000270632  | 1 | 1 | 1 | # | ao  |
| 3909 | 24 | 1 | 1.575000  | -0.000205029  | -25.929211568 | -0.000270632  | 1 | 1 | 1 | # | ao  |
| 3910 | 24 | 2 | 0.425000  | -1.442049128  | -24.451832678 | 1.486115063   | 1 | 1 | 1 | # | ho  |
| 3911 | 24 | 2 | 0.425000  | -4.030399128  | 26.730017322  | 1.486115063   | 1 | 0 | 1 | # | ho  |
| 3912 | 24 | 2 | 0.425000  | -3.734650872  | -24.457267322 | -1.486115063  | 1 | 1 | 1 | # | ho  |
| 3913 | 24 | 3 | 0.425000  | -1.146300872  | -20.002717322 | -1.486115063  | 1 | 1 | 1 | # | do  |
| 3914 | 24 | 4 | -1.050000 | -4.195385345  | -27.231598519 | -1.033422068  | 1 | 1 | 1 | # | ob  |
| 3915 | 24 | 4 | -1.050000 | -0.153182736  | -22.604003874 | -3.231846262  | 1 | 1 | 1 | # | ob  |
| 3916 | 24 | 4 | -1.050000 | -1.606455513  | -26.135450680 | -1.033631378  | 1 | 1 | 1 | # | ob  |
| 3917 | 24 | 4 | -1.050000 | -2.741860908  | -21.860389700 | -3.233079711  | 1 | 1 | 1 | # | ob  |
| 3918 | 24 | 4 | -1.050000 | -4.194805513  | -21.680900680 | -1.033631378  | 1 | 1 | 1 | # | ob  |
| 3919 | 24 | 4 | -1.050000 | -3.570244487  | -22.773649320 | 1.033631378   | 1 | 1 | 1 | # | ob  |
| 3920 | 24 | 4 | -1.050000 | -0.153510908  | -26.314939700 | -3.233079711  | 1 | 1 | 1 | # | ob  |
| 3921 | 24 | 4 | -1.050000 | -3.569664655  | -26.132051481 | 1.033422068   | 1 | 1 | 1 | # | ob  |
| 3922 | 24 | 4 | -1.050000 | -2.435167264  | -21.850546126 | 3.231846262   | 1 | 1 | 1 | # | ob  |
| 3923 | 24 | 4 | -1.050000 | -0.981314655  | -21.677501481 | 1.033422068   | 1 | 1 | 1 | # | ob  |
| 3924 | 24 | 4 | -1.050000 | -5.023517264  | -26.305096126 | 3.231846262   | 1 | 1 | 1 | # | ob  |
| 3925 | 24 | 4 | -1.050000 | -2.434839092  | -27.048710300 | 3.233079711   | 1 | 1 | 1 | # | ob  |
| 3926 | 24 | 7 | -0.950000 | -3.177442343  | 26.728240996  | 1.012582885   | 1 | 0 | 1 | # | oh  |
| 3927 | 24 | 4 | -1.050000 | -0.509618349  | 26.731276970  | 3.061482417   | 1 | 0 | 1 | # | ob  |
| 3928 | 24 | 7 | -0.950000 | -0.589092343  | -24.453609004 | 1.012582885   | 1 | 1 | 1 | # | oh  |
| 3929 | 24 | 4 | -1.050000 | -3.097968349  | -24.450573030 | 3.061482417   | 1 | 1 | 1 | # | ob  |
| 3930 | 24 | 5 | -0.950000 | -1.999257657  | -20.000940996 | -1.012582885  | 1 | 1 | 1 | # | oh  |
| 3931 | 24 | 6 | -0.950000 | -4.667081651  | -20.003976970 | -3.061482417  | 1 | 1 | 1 | # | oh  |
| 3932 | 24 | 7 | -0.950000 | -4.587607657  | -24.455490996 | -1.012582885  | 1 | 1 | 1 | # | oh  |
| 3933 | 24 | 4 | -1.050000 | -2.078731651  | -24.458526970 | -3.061482417  | 1 | 1 | 1 | # | ob  |
| 3934 | 24 | 4 | -1.050000 | -0.981894487  | -27.228199320 | 1.033631378   | 1 | 1 | 1 | # | ob  |
| 3935 | 24 | 4 | -1.050000 | -5.023189092  | -22.594160300 | 3.233079711   | 1 | 1 | 1 | # | ob  |
| 3936 | 24 | 4 | -1.050000 | -1.607035345  | -22.777048519 | -1.033422068  | 1 | 1 | 1 | # | ob  |
| 3937 | 24 | 4 | -1.050000 | -2.741532736  | -27.058553874 | -3.231846262  | 1 | 1 | 1 | # | ob  |
| 3938 | 24 | 8 | 2.100000  | -0.953702986  | -27.381980796 | 2.662777170   | 1 | 1 | 1 | # | st  |
| 3939 | 24 | 8 | 2.100000  | -1.634672226  | -22.935729218 | -2.661798097  | 1 | 1 | 1 | # | st  |
| 3940 | 24 | 8 | 2.100000  | -4.222997014  | -21.527119204 | -2.662777170  | 1 | 1 | 1 | # | st  |
| 3941 | 24 | 8 | 2.100000  | -1.634647014  | -25.981669204 | -2.662777170  | 1 | 1 | 1 | # | st  |
| 3942 | 24 | 8 | 2.100000  | -0.953677774  | -21.518820782 | 2.661798097   | 1 | 1 | 1 | # | st  |
| 3943 | 24 | 8 | 2.100000  | -3.542027774  | -25.973370782 | 2.661798097   | 1 | 1 | 1 | # | st  |
| 3944 | 24 | 8 | 2.100000  | -3.542052986  | -22.927430796 | 2.662777170   | 1 | 1 | 1 | # | st  |
| 3945 | 24 | 8 | 2.100000  | -4.223022226  | -27.390279218 | -2.661798097  | 1 | 1 | 1 | # | st  |
| 3946 | 25 | 6 | -0.950000 | 4.737466427   | -19.680858114 | 11.921220950  | 0 | 1 | 0 | # | oht |
| 3947 | 25 | 6 | -0.950000 | 0.304938203   | -0.272172439  | 6.530772887   | 0 | 0 | 0 | # | oht |
| 3948 | 25 | 3 | 0.425000  | 4.999988619   | -1.054326608  | 12.429570537  | 0 | 0 | 0 | # | do  |
| 3949 | 25 | 3 | 0.425000  | 4.863848964   | -18.596754758 | 11.719113544  | 0 | 1 | 0 | # | do  |
| 3950 | 25 | 3 | 0.425000  | 0.113048915   | -19.012312375 | 5.968636949   | 0 | 1 | 0 | # | do  |
| 3951 | 26 | 6 | -0.950000 | 9.914166427   | -19.680858114 | 11.921220950  | 0 | 1 | 0 | # | oht |
| 3952 | 26 | 6 | -0.950000 | 5.481638203   | -0.272172439  | 6.530772887   | 0 | 0 | 0 | # | oht |
| 3953 | 26 | 3 | 0.425000  | 5.133272253   | -1.308055357  | 6.336639507   | 0 | 0 | 0 | # | do  |
| 3954 | 26 | 3 | 0.425000  | 10.176688619  | -1.054326608  | 12.429570537  | 0 | 0 | 0 | # | do  |
| 3955 | 26 | 3 | 0.425000  | 10.040548964  | -18.596754758 | 11.719113544  | 0 | 1 | 0 | # | do  |
| 3956 | 26 | 3 | 0.425000  | 5.289748915   | -19.012312375 | 5.968636949   | 0 | 1 | 0 | # | do  |
| 3957 | 27 | 6 | -0.950000 | 15.090866427  | -19.680858114 | 11.921220950  | 0 | 1 | 0 | # | oht |
| 3958 | 27 | 6 | -0.950000 | 10.658338203  | -0.272172439  | 6.530772887   | 0 | 0 | 0 | # | oht |
| 3959 | 27 | 3 | 0.425000  | 10.309972253  | -1.308055357  | 6.336639507   | 0 | 0 | 0 | # | do  |
| 3960 | 27 | 3 | 0.425000  | 15.353388619  | -1.054326608  | 12.429570537  | 0 | 0 | 0 | # | do  |
| 3961 | 27 | 3 | 0.425000  | 15.217248964  | -18.596754758 | 11.719113544  | 0 | 1 | 0 | # | do  |
| 3962 | 27 | 3 | 0.425000  | 10.466448915  | -19.012312375 | 5.968636949   | 0 | 1 | 0 | # | oht |
| 3963 | 28 | 6 | -0.950000 | -10.792633573 | -19.680858114 | 11.921220950  | 1 | 1 | 0 | # | oht |
| 3964 | 28 | 6 | -0.950000 | -15.225161797 | -0.272172439  | 6.530772887   | 1 | 0 | 0 | # | oht |
| 3965 | 28 | 3 | 0.425000  | 15.486672253  | -1.308055357  | 6.336639507   | 0 | 0 | 0 | # | do  |
| 3966 | 28 | 3 | 0.425000  | -10.530111381 | -1.054326608  | 12.429570537  | 1 | 0 | 0 | # | do  |
| 3967 | 28 | 3 | 0.425000  | -10.666251036 | -18.596754758 | 11.719113544  | 1 | 1 | 0 | # | do  |
| 3968 | 28 | 3 | 0.425000  | -15.417051085 | -19.012312375 | 5.968636949   | 1 | 1 | 0 | # | do  |
| 3969 | 29 | 6 | -0.950000 | -5.615933573  | -19.680858114 | 11.921220950  | 1 | 1 | 0 | # | oht |
| 3970 | 29 | 6 | -0.950000 | -10.048461797 | -0.272172439  | 6.530772887   | 1 | 0 | 0 | # | oht |
| 3971 | 29 | 3 | 0.425000  | -10.396827747 | -1.308055357  | 6.336639507   | 1 | 0 | 0 | # | do  |
| 3972 | 29 | 3 | 0.425000  | -5.353411381  | -1.054326608  | 12.429570537  | 1 | 0 | 0 | # | do  |
| 3973 | 29 | 3 | 0.425000  | -5.489551036  | -18.596754758 | 11.719113544  | 1 | 1 | 0 | # | do  |
| 3974 | 29 | 3 | 0.425000  | -10.240351085 | -19.012312375 | 5.968636949   | 1 | 1 | 0 | # | do  |
| 3975 | 30 | 6 | -0.950000 | -0.439233573  | -19.680858114 | 11.921220950  | 1 | 1 | 0 | # | oht |
| 3976 | 30 | 6 | -0.950000 | -4.871761797  | -0.272172439  | 6.530772887   | 1 | 0 | 0 | # | oht |
| 3977 | 30 | 3 | 0.425000  | -5.220127747  | -1.308055357  | 6.336639507   | 1 | 0 | 0 | # | do  |
| 3978 | 30 | 3 | 0.425000  | -0.176711381  | -1.054326608  | 12.429570537  | 1 | 0 | 0 | # | do  |
| 3979 | 30 | 3 | 0.425000  | -0.312851036  | -18.596754758 | 11.719113544  | 1 | 1 | 0 | # | do  |
| 3980 | 30 | 3 | 0.425000  | -5.063651085  | -19.012312375 | 5.968636949   | 1 | 1 | 0 | # | do  |
| 3981 | 31 | 3 | 0.425000  | -0.043427747  | -1.308055357  | 6.336639507   | 1 | 0 | 0 | # | do  |
| 3982 | 32 | 3 | 0.425000  | -0.043427747  | -1.308055357  | 15.669139507  | 1 | 0 | 0 | # | do  |
| 3983 | 33 | 3 | 0.425000  | -0.043427747  | -1.308055357  | -12.328360493 | 1 | 0 | 1 | # | do  |
| 3984 | 34 | 3 | 0.425000  | -0.043427747  | -1.308055357  | -2.995860493  | 1 | 0 | 1 | # | do  |

Bonds

|   |   |   |    |
|---|---|---|----|
| 1 | 1 | 5 | 23 |
| 2 | 2 | 6 | 21 |
| 3 | 1 | 7 | 27 |
| 4 | 1 | 8 | 25 |

|    |   |      |      |
|----|---|------|------|
| 5  | 3 | 3948 | 22   |
| 6  | 1 | 45   | 63   |
| 7  | 1 | 46   | 61   |
| 8  | 1 | 47   | 67   |
| 9  | 1 | 48   | 65   |
| 10 | 1 | 85   | 103  |
| 11 | 1 | 86   | 101  |
| 12 | 1 | 87   | 107  |
| 13 | 1 | 88   | 105  |
| 14 | 1 | 125  | 143  |
| 15 | 1 | 126  | 141  |
| 16 | 1 | 127  | 147  |
| 17 | 2 | 128  | 145  |
| 18 | 3 | 3950 | 146  |
| 19 | 3 | 164  | 161  |
| 20 | 3 | 3982 | 162  |
| 21 | 3 | 163  | 1017 |
| 22 | 3 | 165  | 1141 |
| 23 | 1 | 170  | 188  |
| 24 | 2 | 171  | 186  |
| 25 | 1 | 172  | 192  |
| 26 | 1 | 173  | 190  |
| 27 | 3 | 3954 | 187  |
| 28 | 1 | 210  | 228  |
| 29 | 1 | 211  | 226  |
| 30 | 1 | 212  | 232  |
| 31 | 1 | 213  | 230  |
| 32 | 1 | 250  | 268  |
| 33 | 1 | 251  | 266  |
| 34 | 1 | 252  | 272  |
| 35 | 1 | 253  | 270  |
| 36 | 1 | 290  | 308  |
| 37 | 1 | 291  | 306  |
| 38 | 1 | 292  | 312  |
| 39 | 2 | 293  | 310  |
| 40 | 3 | 3956 | 311  |
| 41 | 3 | 330  | 326  |
| 42 | 3 | 328  | 327  |
| 43 | 3 | 329  | 1182 |
| 44 | 3 | 331  | 1306 |
| 45 | 1 | 336  | 354  |
| 46 | 2 | 337  | 352  |
| 47 | 1 | 338  | 358  |
| 48 | 1 | 339  | 356  |
| 49 | 3 | 3960 | 353  |
| 50 | 1 | 376  | 394  |
| 51 | 1 | 377  | 392  |
| 52 | 1 | 378  | 398  |
| 53 | 1 | 379  | 396  |
| 54 | 1 | 416  | 434  |
| 55 | 1 | 417  | 432  |
| 56 | 1 | 418  | 438  |
| 57 | 1 | 419  | 436  |
| 58 | 1 | 456  | 474  |
| 59 | 1 | 457  | 472  |
| 60 | 1 | 458  | 478  |
| 61 | 2 | 459  | 476  |
| 62 | 3 | 3962 | 477  |
| 63 | 3 | 496  | 492  |
| 64 | 3 | 494  | 493  |
| 65 | 3 | 495  | 1348 |
| 66 | 3 | 497  | 1472 |
| 67 | 1 | 502  | 520  |
| 68 | 2 | 503  | 518  |
| 69 | 1 | 504  | 524  |
| 70 | 1 | 505  | 522  |
| 71 | 3 | 3966 | 519  |
| 72 | 1 | 542  | 560  |
| 73 | 1 | 543  | 558  |
| 74 | 1 | 544  | 564  |
| 75 | 1 | 545  | 562  |
| 76 | 1 | 582  | 600  |
| 77 | 1 | 583  | 598  |
| 78 | 1 | 584  | 604  |
| 79 | 1 | 585  | 602  |
| 80 | 1 | 622  | 640  |
| 81 | 1 | 623  | 638  |
| 82 | 1 | 624  | 644  |
| 83 | 2 | 625  | 642  |
| 84 | 3 | 3968 | 643  |
| 85 | 3 | 662  | 658  |
| 86 | 3 | 660  | 659  |
| 87 | 3 | 661  | 1514 |
| 88 | 3 | 663  | 1638 |
| 89 | 1 | 668  | 686  |
| 90 | 2 | 669  | 684  |
| 91 | 1 | 670  | 690  |
| 92 | 1 | 671  | 688  |
| 93 | 3 | 3972 | 685  |
| 94 | 1 | 708  | 726  |
| 95 | 1 | 709  | 724  |
| 96 | 1 | 710  | 730  |
| 97 | 1 | 711  | 728  |

|     |   |      |      |
|-----|---|------|------|
| 98  | 1 | 748  | 766  |
| 99  | 1 | 749  | 764  |
| 100 | 1 | 750  | 770  |
| 101 | 1 | 751  | 768  |
| 102 | 1 | 788  | 806  |
| 103 | 1 | 789  | 804  |
| 104 | 1 | 790  | 810  |
| 105 | 2 | 791  | 808  |
| 106 | 3 | 3974 | 809  |
| 107 | 3 | 828  | 824  |
| 108 | 3 | 826  | 825  |
| 109 | 3 | 827  | 1680 |
| 110 | 3 | 829  | 1804 |
| 111 | 1 | 834  | 852  |
| 112 | 2 | 835  | 850  |
| 113 | 1 | 836  | 856  |
| 114 | 1 | 837  | 854  |
| 115 | 3 | 3978 | 851  |
| 116 | 1 | 874  | 892  |
| 117 | 1 | 875  | 890  |
| 118 | 1 | 876  | 896  |
| 119 | 1 | 877  | 894  |
| 120 | 1 | 914  | 932  |
| 121 | 1 | 915  | 930  |
| 122 | 1 | 916  | 936  |
| 123 | 1 | 917  | 934  |
| 124 | 1 | 954  | 972  |
| 125 | 1 | 955  | 970  |
| 126 | 1 | 956  | 976  |
| 127 | 2 | 957  | 974  |
| 128 | 3 | 3980 | 975  |
| 129 | 3 | 994  | 990  |
| 130 | 3 | 992  | 991  |
| 131 | 3 | 993  | 1846 |
| 132 | 3 | 995  | 1970 |
| 133 | 1 | 1000 | 1018 |
| 134 | 2 | 1001 | 1016 |
| 135 | 1 | 1002 | 1022 |
| 136 | 1 | 1003 | 1020 |
| 137 | 1 | 1040 | 1058 |
| 138 | 1 | 1041 | 1056 |
| 139 | 1 | 1042 | 1062 |
| 140 | 1 | 1043 | 1060 |
| 141 | 1 | 1080 | 1098 |
| 142 | 1 | 1081 | 1096 |
| 143 | 1 | 1082 | 1102 |
| 144 | 1 | 1083 | 1100 |
| 145 | 1 | 1120 | 1138 |
| 146 | 1 | 1121 | 1136 |
| 147 | 1 | 1122 | 1142 |
| 148 | 2 | 1123 | 1140 |
| 149 | 3 | 1159 | 1156 |
| 150 | 3 | 3983 | 1157 |
| 151 | 3 | 1158 | 2012 |
| 152 | 3 | 1160 | 2136 |
| 153 | 1 | 1165 | 1183 |
| 154 | 2 | 1166 | 1181 |
| 155 | 1 | 1167 | 1187 |
| 156 | 1 | 1168 | 1185 |
| 157 | 1 | 1205 | 1223 |
| 158 | 1 | 1206 | 1221 |
| 159 | 1 | 1207 | 1227 |
| 160 | 1 | 1208 | 1225 |
| 161 | 1 | 1245 | 1263 |
| 162 | 1 | 1246 | 1261 |
| 163 | 1 | 1247 | 1267 |
| 164 | 1 | 1248 | 1265 |
| 165 | 1 | 1285 | 1303 |
| 166 | 1 | 1286 | 1301 |
| 167 | 1 | 1287 | 1307 |
| 168 | 2 | 1288 | 1305 |
| 169 | 3 | 1325 | 1321 |
| 170 | 3 | 1323 | 1322 |
| 171 | 3 | 1324 | 2177 |
| 172 | 3 | 1326 | 2301 |
| 173 | 1 | 1331 | 1349 |
| 174 | 2 | 1332 | 1347 |
| 175 | 1 | 1333 | 1353 |
| 176 | 1 | 1334 | 1351 |
| 177 | 1 | 1371 | 1389 |
| 178 | 1 | 1372 | 1387 |
| 179 | 1 | 1373 | 1393 |
| 180 | 1 | 1374 | 1391 |
| 181 | 1 | 1411 | 1429 |
| 182 | 1 | 1412 | 1427 |
| 183 | 1 | 1413 | 1433 |
| 184 | 1 | 1414 | 1431 |
| 185 | 1 | 1451 | 1469 |
| 186 | 1 | 1452 | 1467 |
| 187 | 1 | 1453 | 1473 |
| 188 | 2 | 1454 | 1471 |
| 189 | 3 | 1491 | 1487 |
| 190 | 3 | 1489 | 1488 |

191 3 1490 2343  
192 3 1492 2467  
193 1 1497 1515  
194 2 1498 1513  
195 1 1499 1519  
196 1 1500 1517  
197 1 1537 1555  
198 1 1538 1553  
199 1 1539 1559  
200 1 1540 1557  
201 1 1577 1595  
202 1 1578 1593  
203 1 1579 1599  
204 1 1580 1597  
205 1 1617 1635  
206 1 1618 1633  
207 1 1619 1639  
208 2 1620 1637  
209 3 1657 1653  
210 3 1655 1654  
211 3 1656 2509  
212 3 1658 2633  
213 1 1663 1681  
214 2 1664 1679  
215 1 1665 1685  
216 1 1666 1683  
217 1 1703 1721  
218 1 1704 1719  
219 1 1705 1725  
220 1 1706 1723  
221 1 1743 1761  
222 1 1744 1759  
223 1 1745 1765  
224 1 1746 1763  
225 1 1783 1801  
226 1 1784 1799  
227 1 1785 1805  
228 2 1786 1803  
229 3 1823 1819  
230 3 1821 1820  
231 3 1822 2675  
232 3 1824 2799  
233 1 1829 1847  
234 2 1830 1845  
235 1 1831 1851  
236 1 1832 1849  
237 1 1869 1887  
238 1 1870 1885  
239 1 1871 1891  
240 1 1872 1889  
241 1 1909 1927  
242 1 1910 1925  
243 1 1911 1931  
244 1 1912 1929  
245 1 1949 1967  
246 1 1950 1965  
247 1 1951 1971  
248 2 1952 1969  
249 3 1989 1985  
250 3 1987 1986  
251 3 1988 2841  
252 3 1990 2965  
253 1 1995 2013  
254 2 1996 2011  
255 1 1997 2017  
256 1 1998 2015  
257 1 2035 2053  
258 1 2036 2051  
259 1 2037 2057  
260 1 2038 2055  
261 1 2075 2093  
262 1 2076 2091  
263 1 2077 2097  
264 1 2078 2095  
265 1 2115 2133  
266 1 2116 2131  
267 1 2117 2137  
268 2 2118 2135  
269 3 2154 2151  
270 3 3984 2152  
271 3 2153 3007  
272 3 2155 3131  
273 1 2160 2178  
274 2 2161 2176  
275 1 2162 2182  
276 1 2163 2180  
277 1 2200 2218  
278 1 2201 2216  
279 1 2202 2222  
280 1 2203 2220  
281 1 2240 2258  
282 1 2241 2256  
283 1 2242 2262

284 1 2243 2260  
285 1 2280 2298  
286 1 2281 2296  
287 1 2282 2302  
288 2 2283 2300  
289 3 2320 2316  
290 3 2318 2317  
291 3 2319 3167  
292 3 2321 3291  
293 1 2326 2344  
294 2 2327 2342  
295 1 2328 2348  
296 1 2329 2346  
297 1 2366 2384  
298 1 2367 2382  
299 1 2368 2388  
300 1 2369 2386  
301 1 2406 2424  
302 1 2407 2422  
303 1 2408 2428  
304 1 2409 2426  
305 1 2446 2464  
306 1 2447 2462  
307 1 2448 2468  
308 2 2449 2466  
309 3 2486 2482  
310 3 2484 2483  
311 3 2485 3327  
312 3 2487 3451  
313 1 2492 2510  
314 2 2493 2508  
315 1 2494 2514  
316 1 2495 2512  
317 1 2532 2550  
318 1 2533 2548  
319 1 2534 2554  
320 1 2535 2552  
321 1 2572 2590  
322 1 2573 2588  
323 1 2574 2594  
324 1 2575 2592  
325 1 2612 2630  
326 1 2613 2628  
327 1 2614 2634  
328 2 2615 2632  
329 3 2652 2648  
330 3 2650 2649  
331 3 2651 3487  
332 3 2653 3611  
333 1 2658 2676  
334 2 2659 2674  
335 1 2660 2680  
336 1 2661 2678  
337 1 2698 2716  
338 1 2699 2714  
339 1 2700 2720  
340 1 2701 2718  
341 1 2738 2756  
342 1 2739 2754  
343 1 2740 2760  
344 1 2741 2758  
345 1 2778 2796  
346 1 2779 2794  
347 1 2780 2800  
348 2 2781 2798  
349 3 2818 2814  
350 3 2816 2815  
351 3 2817 3647  
352 3 2819 3771  
353 1 2824 2842  
354 2 2825 2840  
355 1 2826 2846  
356 1 2827 2844  
357 1 2864 2882  
358 1 2865 2880  
359 1 2866 2886  
360 1 2867 2884  
361 1 2904 2922  
362 1 2905 2920  
363 1 2906 2926  
364 1 2907 2924  
365 1 2944 2962  
366 1 2945 2960  
367 1 2946 2966  
368 2 2947 2964  
369 3 2984 2980  
370 3 2982 2981  
371 3 2983 3807  
372 3 2985 3931  
373 1 2990 3008  
374 2 2991 3006  
375 1 2992 3012  
376 1 2993 3010



377 1 3030 3048  
378 1 3031 3046  
379 1 3032 3052  
380 1 3033 3050  
381 1 3070 3088  
382 1 3071 3086  
383 1 3072 3092  
384 1 3073 3090  
385 1 3110 3128  
386 1 3111 3126  
387 1 3112 3132  
388 2 3113 3130  
389 1 3150 3168  
390 2 3151 3166  
391 1 3152 3172  
392 1 3153 3170  
393 1 3190 3208  
394 1 3191 3206  
395 1 3192 3212  
396 1 3193 3210  
397 1 3230 3248  
398 1 3231 3246  
399 1 3232 3252  
400 1 3233 3250  
401 1 3270 3288  
402 1 3271 3286  
403 1 3272 3292  
404 2 3273 3290  
405 1 3310 3328  
406 2 3311 3326  
407 1 3312 3332  
408 1 3313 3330  
409 1 3350 3368  
410 1 3351 3366  
411 1 3352 3372  
412 1 3353 3370  
413 1 3390 3408  
414 1 3391 3406  
415 1 3392 3412  
416 1 3393 3410  
417 1 3430 3448  
418 1 3431 3446  
419 1 3432 3452  
420 2 3433 3450  
421 1 3470 3488  
422 2 3471 3486  
423 1 3472 3492  
424 1 3473 3490  
425 1 3510 3528  
426 1 3511 3526  
427 1 3512 3532  
428 1 3513 3530  
429 1 3550 3568  
430 1 3551 3566  
431 1 3552 3572  
432 1 3553 3570  
433 1 3590 3608  
434 1 3591 3606  
435 1 3592 3612  
436 2 3593 3610  
437 1 3630 3648  
438 2 3631 3646  
439 1 3632 3652  
440 1 3633 3650  
441 1 3670 3688  
442 1 3671 3686  
443 1 3672 3692  
444 1 3673 3690  
445 1 3710 3728  
446 1 3711 3726  
447 1 3712 3732  
448 1 3713 3730  
449 1 3750 3768  
450 1 3751 3766  
451 1 3752 3772  
452 2 3753 3770  
453 1 3790 3808  
454 2 3791 3806  
455 1 3792 3812  
456 1 3793 3810  
457 1 3830 3848  
458 1 3831 3846  
459 1 3832 3852  
460 1 3833 3850  
461 1 3870 3888  
462 1 3871 3886  
463 1 3872 3892  
464 1 3873 3890  
465 1 3910 3928  
466 1 3911 3926  
467 1 3912 3932  
468 2 3913 3930  
469 3 3949 3946

470 3 3981 3947  
471 3 3955 3951  
472 3 3953 3952  
473 3 3961 3957  
474 3 3959 3958  
475 3 3967 3963  
476 3 3965 3964  
477 3 3973 3969  
478 3 3971 3970  
479 3 3979 3975  
480 3 3977 3976

Angles

1 1 1 21 6  
2 2 3948 22 33  
3 3 4 23 5  
4 3 167 23 5  
5 3 3 25 8  
6 3 41 25 8  
7 3 2 27 7  
8 3 833 27 7  
9 3 3 61 46  
10 3 41 61 46  
11 3 44 63 45  
12 3 207 63 45  
13 3 43 65 48  
14 3 81 65 48  
15 3 42 67 47  
16 3 873 67 47  
17 3 43 101 86  
18 3 81 101 86  
19 3 84 103 85  
20 3 247 103 85  
21 3 83 105 88  
22 3 121 105 88  
23 3 82 107 87  
24 3 913 107 87  
25 3 83 141 126  
26 3 121 141 126  
27 3 124 143 125  
28 3 287 143 125  
29 1 123 145 128  
30 2 3950 146 155  
31 3 122 147 127  
32 3 953 147 127  
33 2 164 161 1152  
34 2 3982 162 1035  
35 1 166 186 171  
36 2 3954 187 198  
37 3 169 188 170  
38 3 333 188 170  
39 3 168 190 173  
40 3 206 190 173  
41 3 4 192 172  
42 3 167 192 172  
43 3 168 226 211  
44 3 206 226 211  
45 3 209 228 210  
46 3 373 228 210  
47 3 208 230 213  
48 3 246 230 213  
49 3 44 232 212  
50 3 207 232 212  
51 3 208 266 251  
52 3 246 266 251  
53 3 249 268 250  
54 3 413 268 250  
55 3 248 270 253  
56 3 286 270 253  
57 3 84 272 252  
58 3 247 272 252  
59 3 248 306 291  
60 3 286 306 291  
61 3 289 308 290  
62 3 453 308 290  
63 1 288 310 293  
64 2 3956 311 320  
65 3 124 312 292  
66 3 287 312 292  
67 2 330 326 1317  
68 2 328 327 1200  
69 1 332 352 337  
70 2 3960 353 364  
71 3 335 354 336  
72 3 499 354 336  
73 3 334 356 339  
74 3 372 356 339  
75 3 169 358 338  
76 3 333 358 338  
77 3 334 392 377  
78 3 372 392 377  
79 3 375 394 376

80 3 539 394 376  
81 3 374 396 379  
82 3 412 396 379  
83 3 209 398 378  
84 3 373 398 378  
85 3 374 432 417  
86 3 412 432 417  
87 3 415 434 416  
88 3 579 434 416  
89 3 414 436 419  
90 3 452 436 419  
91 3 249 438 418  
92 3 413 438 418  
93 3 414 472 457  
94 3 452 472 457  
95 3 455 474 456  
96 3 619 474 456  
97 1 454 476 459  
98 2 3962 477 486  
99 3 289 478 458  
100 3 453 478 458  
101 2 496 492 1483  
102 2 494 493 1366  
103 1 498 518 503  
104 2 3966 519 530  
105 3 501 520 502  
106 3 665 520 502  
107 3 500 522 505  
108 3 538 522 505  
109 3 335 524 504  
110 3 499 524 504  
111 3 500 558 543  
112 3 538 558 543  
113 3 541 560 542  
114 3 705 560 542  
115 3 540 562 545  
116 3 578 562 545  
117 3 375 564 544  
118 3 539 564 544  
119 3 540 598 583  
120 3 578 598 583  
121 3 581 600 582  
122 3 745 600 582  
123 3 580 602 585  
124 3 618 602 585  
125 3 415 604 584  
126 3 579 604 584  
127 3 580 638 623  
128 3 618 638 623  
129 3 621 640 622  
130 3 785 640 622  
131 1 620 642 625  
132 2 3968 643 652  
133 3 455 644 624  
134 3 619 644 624  
135 2 662 658 1649  
136 2 660 659 1532  
137 1 664 684 669  
138 2 3972 685 696  
139 3 667 686 668  
140 3 831 686 668  
141 3 666 688 671  
142 3 704 688 671  
143 3 501 690 670  
144 3 665 690 670  
145 3 666 724 709  
146 3 704 724 709  
147 3 707 726 708  
148 3 871 726 708  
149 3 706 728 711  
150 3 744 728 711  
151 3 541 730 710  
152 3 705 730 710  
153 3 706 764 749  
154 3 744 764 749  
155 3 747 766 748  
156 3 911 766 748  
157 3 746 768 751  
158 3 784 768 751  
159 3 581 770 750  
160 3 745 770 750  
161 3 746 804 789  
162 3 784 804 789  
163 3 787 806 788  
164 3 951 806 788  
165 1 786 808 791  
166 2 3974 809 818  
167 3 621 810 790  
168 3 785 810 790  
169 2 828 824 1815  
170 2 826 825 1698  
171 1 830 850 835  
172 2 3978 851 862

173 3 833 852 834  
174 3 2 852 834  
175 3 832 854 837  
176 3 870 854 837  
177 3 667 856 836  
178 3 831 856 836  
179 3 832 890 875  
180 3 870 890 875  
181 3 873 892 874  
182 3 42 892 874  
183 3 872 894 877  
184 3 910 894 877  
185 3 707 896 876  
186 3 871 896 876  
187 3 872 930 915  
188 3 910 930 915  
189 3 913 932 914  
190 3 82 932 914  
191 3 912 934 917  
192 3 950 934 917  
193 3 747 936 916  
194 3 911 936 916  
195 3 912 970 955  
196 3 950 970 955  
197 3 953 972 954  
198 3 122 972 954  
199 1 952 974 957  
200 2 3980 975 984  
201 3 787 976 956  
202 3 951 976 956  
203 2 994 990 1981  
204 2 992 991 1864  
205 1 996 1016 1001  
206 2 163 1017 1028  
207 3 999 1018 1000  
208 3 1162 1018 1000  
209 3 998 1020 1003  
210 3 1036 1020 1003  
211 3 997 1022 1002  
212 3 1828 1022 1002  
213 3 998 1056 1041  
214 3 1036 1056 1041  
215 3 1039 1058 1040  
216 3 1202 1058 1040  
217 3 1038 1060 1043  
218 3 1076 1060 1043  
219 3 1037 1062 1042  
220 3 1868 1062 1042  
221 3 1038 1096 1081  
222 3 1076 1096 1081  
223 3 1079 1098 1080  
224 3 1242 1098 1080  
225 3 1078 1100 1083  
226 3 1116 1100 1083  
227 3 1077 1102 1082  
228 3 1908 1102 1082  
229 3 1078 1136 1121  
230 3 1116 1136 1121  
231 3 1119 1138 1120  
232 3 1282 1138 1120  
233 1 1118 1140 1123  
234 2 165 1141 1150  
235 3 1117 1142 1122  
236 3 1948 1142 1122  
237 2 1159 1156 2147  
238 2 3983 1157 2030  
239 1 1161 1181 1166  
240 2 329 1182 1193  
241 3 1164 1183 1165  
242 3 1328 1183 1165  
243 3 1163 1185 1168  
244 3 1201 1185 1168  
245 3 999 1187 1167  
246 3 1162 1187 1167  
247 3 1163 1221 1206  
248 3 1201 1221 1206  
249 3 1204 1223 1205  
250 3 1368 1223 1205  
251 3 1203 1225 1208  
252 3 1241 1225 1208  
253 3 1039 1227 1207  
254 3 1202 1227 1207  
255 3 1203 1261 1246  
256 3 1241 1261 1246  
257 3 1244 1263 1245  
258 3 1408 1263 1245  
259 3 1243 1265 1248  
260 3 1281 1265 1248  
261 3 1079 1267 1247  
262 3 1242 1267 1247  
263 3 1243 1301 1286  
264 3 1281 1301 1286  
265 3 1284 1303 1285

266 3 1448 1303 1285  
267 1 1283 1305 1288  
268 2 331 1306 1315  
269 3 1119 1307 1287  
270 3 1282 1307 1287  
271 2 1325 1321 2312  
272 2 1323 1322 2195  
273 1 1327 1347 1332  
274 2 495 1348 1359  
275 3 1330 1349 1331  
276 3 1494 1349 1331  
277 3 1329 1351 1334  
278 3 1367 1351 1334  
279 3 1164 1353 1333  
280 3 1328 1353 1333  
281 3 1329 1387 1372  
282 3 1367 1387 1372  
283 3 1370 1389 1371  
284 3 1534 1389 1371  
285 3 1369 1391 1374  
286 3 1407 1391 1374  
287 3 1204 1393 1373  
288 3 1368 1393 1373  
289 3 1369 1427 1412  
290 3 1407 1427 1412  
291 3 1410 1429 1411  
292 3 1574 1429 1411  
293 3 1409 1431 1414  
294 3 1447 1431 1414  
295 3 1244 1433 1413  
296 3 1408 1433 1413  
297 3 1409 1467 1452  
298 3 1447 1467 1452  
299 3 1450 1469 1451  
300 3 1614 1469 1451  
301 1 1449 1471 1454  
302 2 497 1472 1481  
303 3 1284 1473 1453  
304 3 1448 1473 1453  
305 2 1491 1487 2478  
306 2 1489 1488 2361  
307 1 1493 1513 1498  
308 2 661 1514 1525  
309 3 1496 1515 1497  
310 3 1660 1515 1497  
311 3 1495 1517 1500  
312 3 1533 1517 1500  
313 3 1330 1519 1499  
314 3 1494 1519 1499  
315 3 1495 1553 1538  
316 3 1533 1553 1538  
317 3 1536 1555 1537  
318 3 1700 1555 1537  
319 3 1535 1557 1540  
320 3 1573 1557 1540  
321 3 1370 1559 1539  
322 3 1534 1559 1539  
323 3 1535 1593 1578  
324 3 1573 1593 1578  
325 3 1576 1595 1577  
326 3 1740 1595 1577  
327 3 1575 1597 1580  
328 3 1613 1597 1580  
329 3 1410 1599 1579  
330 3 1574 1599 1579  
331 3 1575 1633 1618  
332 3 1613 1633 1618  
333 3 1616 1635 1617  
334 3 1780 1635 1617  
335 1 1615 1637 1620  
336 2 663 1638 1647  
337 3 1450 1639 1619  
338 3 1614 1639 1619  
339 2 1657 1653 2644  
340 2 1655 1654 2527  
341 1 1659 1679 1664  
342 2 827 1680 1691  
343 3 1662 1681 1663  
344 3 1826 1681 1663  
345 3 1661 1683 1666  
346 3 1699 1683 1666  
347 3 1496 1685 1665  
348 3 1660 1685 1665  
349 3 1661 1719 1704  
350 3 1699 1719 1704  
351 3 1702 1721 1703  
352 3 1866 1721 1703  
353 3 1701 1723 1706  
354 3 1739 1723 1706  
355 3 1536 1725 1705  
356 3 1700 1725 1705  
357 3 1701 1759 1744  
358 3 1739 1759 1744

359 3 1742 1761 1743  
360 3 1906 1761 1743  
361 3 1741 1763 1746  
362 3 1779 1763 1746  
363 3 1576 1765 1745  
364 3 1740 1765 1745  
365 3 1741 1799 1784  
366 3 1779 1799 1784  
367 3 1782 1801 1783  
368 3 1946 1801 1783  
369 1 1781 1803 1786  
370 2 829 1804 1813  
371 3 1616 1805 1785  
372 3 1780 1805 1785  
373 2 1823 1819 2810  
374 2 1821 1820 2693  
375 1 1825 1845 1830  
376 2 993 1846 1857  
377 3 1828 1847 1829  
378 3 997 1847 1829  
379 3 1827 1849 1832  
380 3 1865 1849 1832  
381 3 1662 1851 1831  
382 3 1826 1851 1831  
383 3 1827 1885 1870  
384 3 1865 1885 1870  
385 3 1868 1887 1869  
386 3 1037 1887 1869  
387 3 1867 1889 1872  
388 3 1905 1889 1872  
389 3 1702 1891 1871  
390 3 1866 1891 1871  
391 3 1867 1925 1910  
392 3 1905 1925 1910  
393 3 1908 1927 1909  
394 3 1077 1927 1909  
395 3 1907 1929 1912  
396 3 1945 1929 1912  
397 3 1742 1931 1911  
398 3 1906 1931 1911  
399 3 1907 1965 1950  
400 3 1945 1965 1950  
401 3 1948 1967 1949  
402 3 1117 1967 1949  
403 1 1947 1969 1952  
404 2 995 1970 1979  
405 3 1782 1971 1951  
406 3 1946 1971 1951  
407 2 1989 1985 2976  
408 2 1987 1986 2859  
409 1 1991 2011 1996  
410 2 1158 2012 2023  
411 3 1994 2013 1995  
412 3 2157 2013 1995  
413 3 1993 2015 1998  
414 3 2031 2015 1998  
415 3 1992 2017 1997  
416 3 2823 2017 1997  
417 3 1993 2051 2036  
418 3 2031 2051 2036  
419 3 2034 2053 2035  
420 3 2197 2053 2035  
421 3 2033 2055 2038  
422 3 2071 2055 2038  
423 3 2032 2057 2037  
424 3 2863 2057 2037  
425 3 2033 2091 2076  
426 3 2071 2091 2076  
427 3 2074 2093 2075  
428 3 2237 2093 2075  
429 3 2073 2095 2078  
430 3 2111 2095 2078  
431 3 2072 2097 2077  
432 3 2903 2097 2077  
433 3 2073 2131 2116  
434 3 2111 2131 2116  
435 3 2114 2133 2115  
436 3 2277 2133 2115  
437 1 2113 2135 2118  
438 2 1160 2136 2145  
439 3 2112 2137 2117  
440 3 2943 2137 2117  
441 2 2154 2151 3142  
442 2 3984 2152 3025  
443 1 2156 2176 2161  
444 2 1324 2177 2188  
445 3 2159 2178 2160  
446 3 2323 2178 2160  
447 3 2158 2180 2163  
448 3 2196 2180 2163  
449 3 1994 2182 2162  
450 3 2157 2182 2162  
451 3 2158 2216 2201

452 3 2196 2216 2201  
453 3 2199 2218 2200  
454 3 2363 2218 2200  
455 3 2198 2220 2203  
456 3 2236 2220 2203  
457 3 2034 2222 2202  
458 3 2197 2222 2202  
459 3 2198 2256 2241  
460 3 2236 2256 2241  
461 3 2239 2258 2240  
462 3 2403 2258 2240  
463 3 2238 2260 2243  
464 3 2276 2260 2243  
465 3 2074 2262 2242  
466 3 2237 2262 2242  
467 3 2238 2296 2281  
468 3 2276 2296 2281  
469 3 2279 2298 2280  
470 3 2443 2298 2280  
471 1 2278 2300 2283  
472 2 1326 2301 2310  
473 3 2114 2302 2282  
474 3 2277 2302 2282  
475 2 2320 2316 3302  
476 2 2318 2317 3185  
477 1 2322 2342 2327  
478 2 1490 2343 2354  
479 3 2325 2344 2326  
480 3 2489 2344 2326  
481 3 2324 2346 2329  
482 3 2362 2346 2329  
483 3 2159 2348 2328  
484 3 2323 2348 2328  
485 3 2324 2382 2367  
486 3 2362 2382 2367  
487 3 2365 2384 2366  
488 3 2529 2384 2366  
489 3 2364 2386 2369  
490 3 2402 2386 2369  
491 3 2199 2388 2368  
492 3 2363 2388 2368  
493 3 2364 2422 2407  
494 3 2402 2422 2407  
495 3 2405 2424 2406  
496 3 2569 2424 2406  
497 3 2404 2426 2409  
498 3 2442 2426 2409  
499 3 2239 2428 2408  
500 3 2403 2428 2408  
501 3 2404 2462 2447  
502 3 2442 2462 2447  
503 3 2445 2464 2446  
504 3 2609 2464 2446  
505 1 2444 2466 2449  
506 2 1492 2467 2476  
507 3 2279 2468 2448  
508 3 2443 2468 2448  
509 2 2486 2482 3462  
510 2 2484 2483 3345  
511 1 2488 2508 2493  
512 2 1656 2509 2520  
513 3 2491 2510 2492  
514 3 2655 2510 2492  
515 3 2490 2512 2495  
516 3 2528 2512 2495  
517 3 2325 2514 2494  
518 3 2489 2514 2494  
519 3 2490 2548 2533  
520 3 2528 2548 2533  
521 3 2531 2550 2532  
522 3 2695 2550 2532  
523 3 2530 2552 2535  
524 3 2568 2552 2535  
525 3 2365 2554 2534  
526 3 2529 2554 2534  
527 3 2530 2588 2573  
528 3 2568 2588 2573  
529 3 2571 2590 2572  
530 3 2735 2590 2572  
531 3 2570 2592 2575  
532 3 2608 2592 2575  
533 3 2405 2594 2574  
534 3 2569 2594 2574  
535 3 2570 2628 2613  
536 3 2608 2628 2613  
537 3 2611 2630 2612  
538 3 2775 2630 2612  
539 1 2610 2632 2615  
540 2 1658 2633 2642  
541 3 2445 2634 2614  
542 3 2609 2634 2614  
543 2 2652 2648 3622  
544 2 2650 2649 3505

545 1 2654 2674 2659  
546 2 1822 2675 2686  
547 3 2657 2676 2658  
548 3 2821 2676 2658  
549 3 2656 2678 2661  
550 3 2694 2678 2661  
551 3 2491 2680 2660  
552 3 2655 2680 2660  
553 3 2656 2714 2699  
554 3 2694 2714 2699  
555 3 2697 2716 2698  
556 3 2861 2716 2698  
557 3 2696 2718 2701  
558 3 2734 2718 2701  
559 3 2531 2720 2700  
560 3 2695 2720 2700  
561 3 2696 2754 2739  
562 3 2734 2754 2739  
563 3 2737 2756 2738  
564 3 2901 2756 2738  
565 3 2736 2758 2741  
566 3 2774 2758 2741  
567 3 2571 2760 2740  
568 3 2735 2760 2740  
569 3 2736 2794 2779  
570 3 2774 2794 2779  
571 3 2777 2796 2778  
572 3 2941 2796 2778  
573 1 2776 2798 2781  
574 2 1824 2799 2808  
575 3 2611 2800 2780  
576 3 2775 2800 2780  
577 2 2818 2814 3782  
578 2 2816 2815 3665  
579 1 2820 2840 2825  
580 2 1988 2841 2852  
581 3 2823 2842 2824  
582 3 1992 2842 2824  
583 3 2822 2844 2827  
584 3 2860 2844 2827  
585 3 2657 2846 2826  
586 3 2821 2846 2826  
587 3 2822 2880 2865  
588 3 2860 2880 2865  
589 3 2863 2882 2864  
590 3 2032 2882 2864  
591 3 2862 2884 2867  
592 3 2900 2884 2867  
593 3 2697 2886 2866  
594 3 2861 2886 2866  
595 3 2862 2920 2905  
596 3 2900 2920 2905  
597 3 2903 2922 2904  
598 3 2072 2922 2904  
599 3 2902 2924 2907  
600 3 2940 2924 2907  
601 3 2737 2926 2906  
602 3 2901 2926 2906  
603 3 2902 2960 2945  
604 3 2940 2960 2945  
605 3 2943 2962 2944  
606 3 2112 2962 2944  
607 1 2942 2964 2947  
608 2 1990 2965 2974  
609 3 2777 2966 2946  
610 3 2941 2966 2946  
611 2 2984 2980 3942  
612 2 2982 2981 3825  
613 1 2986 3006 2991  
614 2 2153 3007 3018  
615 3 2989 3008 2990  
616 3 3147 3008 2990  
617 3 2988 3010 2993  
618 3 3026 3010 2993  
619 3 2987 3012 2992  
620 3 3789 3012 2992  
621 3 2988 3046 3031  
622 3 3026 3046 3031  
623 3 3029 3048 3030  
624 3 3187 3048 3030  
625 3 3028 3050 3033  
626 3 3066 3050 3033  
627 3 3027 3052 3032  
628 3 3829 3052 3032  
629 3 3028 3086 3071  
630 3 3066 3086 3071  
631 3 3069 3088 3070  
632 3 3227 3088 3070  
633 3 3068 3090 3073  
634 3 3106 3090 3073  
635 3 3067 3092 3072  
636 3 3869 3092 3072  
637 3 3068 3126 3111



638 3 3106 3126 3111  
639 3 3109 3128 3110  
640 3 3267 3128 3110  
641 1 3108 3130 3113  
642 2 2155 3131 3140  
643 3 3107 3132 3112  
644 3 3909 3132 3112  
645 1 3146 3166 3151  
646 2 2319 3167 3178  
647 3 3149 3168 3150  
648 3 3307 3168 3150  
649 3 3148 3170 3153  
650 3 3186 3170 3153  
651 3 2989 3172 3152  
652 3 3147 3172 3152  
653 3 3148 3206 3191  
654 3 3186 3206 3191  
655 3 3189 3208 3190  
656 3 3347 3208 3190  
657 3 3188 3210 3193  
658 3 3226 3210 3193  
659 3 3029 3212 3192  
660 3 3187 3212 3192  
661 3 3188 3246 3231  
662 3 3226 3246 3231  
663 3 3229 3248 3230  
664 3 3387 3248 3230  
665 3 3228 3250 3233  
666 3 3266 3250 3233  
667 3 3069 3252 3232  
668 3 3227 3252 3232  
669 3 3228 3286 3271  
670 3 3266 3286 3271  
671 3 3269 3288 3270  
672 3 3427 3288 3270  
673 1 3268 3290 3273  
674 2 2321 3291 3300  
675 3 3109 3292 3272  
676 3 3267 3292 3272  
677 1 3306 3326 3311  
678 2 2485 3327 3338  
679 3 3309 3328 3310  
680 3 3467 3328 3310  
681 3 3308 3330 3313  
682 3 3346 3330 3313  
683 3 3149 3332 3312  
684 3 3307 3332 3312  
685 3 3308 3366 3351  
686 3 3346 3366 3351  
687 3 3349 3368 3350  
688 3 3507 3368 3350  
689 3 3348 3370 3353  
690 3 3386 3370 3353  
691 3 3189 3372 3352  
692 3 3347 3372 3352  
693 3 3348 3406 3391  
694 3 3386 3406 3391  
695 3 3389 3408 3390  
696 3 3547 3408 3390  
697 3 3388 3410 3393  
698 3 3426 3410 3393  
699 3 3229 3412 3392  
700 3 3387 3412 3392  
701 3 3388 3446 3431  
702 3 3426 3446 3431  
703 3 3429 3448 3430  
704 3 3587 3448 3430  
705 1 3428 3450 3433  
706 2 2487 3451 3460  
707 3 3269 3452 3432  
708 3 3427 3452 3432  
709 1 3466 3486 3471  
710 2 2651 3487 3498  
711 3 3469 3488 3470  
712 3 3627 3488 3470  
713 3 3468 3490 3473  
714 3 3506 3490 3473  
715 3 3309 3492 3472  
716 3 3467 3492 3472  
717 3 3468 3526 3511  
718 3 3506 3526 3511  
719 3 3509 3528 3510  
720 3 3667 3528 3510  
721 3 3508 3530 3513  
722 3 3546 3530 3513  
723 3 3349 3532 3512  
724 3 3507 3532 3512  
725 3 3508 3566 3551  
726 3 3546 3566 3551  
727 3 3549 3568 3550  
728 3 3707 3568 3550  
729 3 3548 3570 3553  
730 3 3586 3570 3553

731 3 3389 3572 3552  
732 3 3547 3572 3552  
733 3 3548 3606 3591  
734 3 3586 3606 3591  
735 3 3589 3608 3590  
736 3 3747 3608 3590  
737 1 3588 3610 3593  
738 2 2653 3611 3620  
739 3 3429 3612 3592  
740 3 3587 3612 3592  
741 1 3626 3646 3631  
742 2 2817 3647 3658  
743 3 3629 3648 3630  
744 3 3787 3648 3630  
745 3 3628 3650 3633  
746 3 3666 3650 3633  
747 3 3469 3652 3632  
748 3 3627 3652 3632  
749 3 3628 3686 3671  
750 3 3666 3686 3671  
751 3 3669 3688 3670  
752 3 3827 3688 3670  
753 3 3668 3690 3673  
754 3 3706 3690 3673  
755 3 3509 3692 3672  
756 3 3667 3692 3672  
757 3 3668 3726 3711  
758 3 3706 3726 3711  
759 3 3709 3728 3710  
760 3 3867 3728 3710  
761 3 3708 3730 3713  
762 3 3746 3730 3713  
763 3 3549 3732 3712  
764 3 3707 3732 3712  
765 3 3708 3766 3751  
766 3 3746 3766 3751  
767 3 3749 3768 3750  
768 3 3907 3768 3750  
769 1 3748 3770 3753  
770 2 2819 3771 3780  
771 3 3589 3772 3752  
772 3 3747 3772 3752  
773 1 3786 3806 3791  
774 2 2983 3807 3818  
775 3 3789 3808 3790  
776 3 2987 3808 3790  
777 3 3788 3810 3793  
778 3 3826 3810 3793  
779 3 3629 3812 3792  
780 3 3787 3812 3792  
781 3 3788 3846 3831  
782 3 3826 3846 3831  
783 3 3829 3848 3830  
784 3 3027 3848 3830  
785 3 3828 3850 3833  
786 3 3866 3850 3833  
787 3 3669 3852 3832  
788 3 3827 3852 3832  
789 3 3828 3886 3871  
790 3 3866 3886 3871  
791 3 3869 3888 3870  
792 3 3067 3888 3870  
793 3 3868 3890 3873  
794 3 3906 3890 3873  
795 3 3709 3892 3872  
796 3 3867 3892 3872  
797 3 3868 3926 3911  
798 3 3906 3926 3911  
799 3 3909 3928 3910  
800 3 3107 3928 3910  
801 1 3908 3930 3913  
802 2 2985 3931 3940  
803 3 3749 3932 3912  
804 3 3907 3932 3912  
805 2 3949 3946 157  
806 2 3981 3947 40  
807 2 3955 3951 322  
808 2 3953 3952 205  
809 2 3961 3957 488  
810 2 3959 3958 371  
811 2 3967 3963 654  
812 2 3965 3964 537  
813 2 3973 3969 820  
814 2 3971 3970 703  
815 2 3979 3975 986  
816 2 3977 3976 869

## LAMMPS Input Script:

```
units      real
atom_style full
boundary   p p p
pair_style lj/cut/coul/long 10
pair_modify mix arithmetic
angle_style harmonic
bond_style morse

read_data 010-6x4x4-dClean.data

kspace_style ewald 0.0001
special_bonds lj 0.0 0.0 0.5
special_bonds coul 0.0 0.0 0.8333

thermo_style custom step etotal ke pe ebond eangle edihed evdwl ecoul elong temp press vol lx ly lz
thermo_modify lost error
thermo     100

timestep   1.0
run_style  respa 2 2 pair 1 kspace 2

velocity all create 298 1103 dist gaussian

fix 1 all nve
fix 2 all temp/rescale 1 298.0 298.0 5 1.0

restart 10000 restart.1 restart.2

run 1000000

unfix 2

run 1000000

timestep .001

unfix 1
fix 3 all nve
fix 4 all press/berendsen x 10000 1.0 1000.0 z 10000 1.0 1000.0
fix 5 all temp/rescale 1 298.0 298.0 5 1.0

run 1000000

unfix 4
unfix 5
fix 6 all press/berendsen x 1.0 1.0 10000.0 z 1.0 1.0 10000.0
fix 7 all temp/berendsen 298.0 298.0 100.0
timestep .01

run 1000000

timestep .1
unfix 6
unfix 7
fix 8 all press/berendsen x 1.0 1.0 100000.0 z 1.0 1.0 100000.0
fix 9 all temp/berendsen 298.0 298.0 100.0

run 1000000

timestep 1.0

unfix 8
unfix 9
fix 10 all press/berendsen x 1.0 1.0 1000000.0 z 1.0 1.0 1000000.0
fix 11 all temp/berendsen 298.0 298.0 100.0

run 10000000

unfix 10
unfix 11

run 10000000

dump 1 all custom 2 dump.velo type id x y z vx vy vz
dump_modify 1 sort 2

run 5000000
```

## 110 Pyrophyllite Face Protonated

### LAMMPS Data File:

LAMMPS data file. clayff2lmp v1.0.0 / 03 Oct 2017 / CGMM for 110-6x4x4Clean

3984 atoms  
480 bonds  
864 angles  
0 dihedrals  
0 impropers  
  
7 atom types  
3 bond types types  
3 angle types types  
  
-15.488400000 15.488400000 xlo xhi  
-18.768200000 18.768200000 ylo yhi  
-26.899200000 26.899200000 zlo zhi

Masses

1 26.981540 # ao  
2 1.007970 # ho  
3 15.999400 # ob  
4 15.999400 # oh  
5 28.085500 # st  
6 15.999400 # oht  
7 15.999400 # oho

Pair Coeffs # lj/cut/coul/long

1 0.0000013297 4.2713219316 # ao  
2 0.0000000000 0.0000000000 # ho  
3 0.1554164124 3.1655200879 # ob  
4 0.1554164124 3.1655200879 # oh  
5 0.0000018402 3.3019566252 # st  
6 0.1554164124 3.1655200879 # oht  
7 0.1554164124 3.1655200879 # oho

Bond Coeffs # harmonic

1 132.2491 2.1815 0.945 # ho-oh  
2 132.2491 2.1815 0.945 # ho-oho  
3 132.2491 2.1815 0.945 # ho-oht

Angle Coeffs # harmonic

1 15.0000 110.0000 # ao-oh-ho  
2 15.0000 100.0000 # ho-oht-st  
3 15.0000 110.0000 # ao-oho-ho

Atoms # full

|    |   |   |           |             |              |              |   |   |   |      |
|----|---|---|-----------|-------------|--------------|--------------|---|---|---|------|
| 1  | 1 | 1 | 1.575000  | 2.564951898 | 0.057857326  | 6.343147493  | 0 | 0 | 0 | # ao |
| 2  | 1 | 1 | 1.575000  | 5.152091886 | 0.047832665  | 2.120047493  | 0 | 0 | 0 | # ao |
| 3  | 1 | 1 | 1.575000  | 0.010475843 | 0.041014554  | 7.691610963  | 0 | 0 | 0 | # ao |
| 4  | 1 | 1 | 1.575000  | 2.597479300 | 0.031026926  | 3.468502305  | 0 | 0 | 0 | # ao |
| 5  | 1 | 2 | 0.425000  | 3.116355855 | 1.425163371  | 1.461851013  | 0 | 0 | 0 | # ho |
| 6  | 1 | 2 | 0.425000  | 0.545922528 | 1.523504153  | 5.731312462  | 0 | 0 | 0 | # ho |
| 7  | 1 | 2 | 0.425000  | 4.617664323 | -1.430790090 | 4.082601022  | 0 | 0 | 0 | # ho |
| 8  | 1 | 2 | 0.425000  | 2.046067415 | -1.336757339 | 8.349425190  | 0 | 0 | 0 | # ho |
| 9  | 1 | 3 | -1.050000 | 1.974320767 | -1.017449350 | 4.908780749  | 0 | 0 | 0 | # ob |
| 10 | 1 | 3 | -1.050000 | 1.589283948 | -1.009534011 | 2.223829865  | 0 | 0 | 0 | # ob |
| 11 | 1 | 3 | -1.050000 | 4.162820410 | -1.002235530 | 6.457577115  | 0 | 0 | 0 | # ob |
| 12 | 1 | 3 | -1.050000 | 2.219750450 | -3.254329459 | 3.535812584  | 0 | 0 | 0 | # ob |
| 13 | 1 | 3 | -1.050000 | 4.804343942 | -3.253528090 | 7.754751701  | 0 | 0 | 0 | # ob |
| 14 | 1 | 3 | -1.050000 | 0.606605783 | 1.108160884  | 0.680433991  | 0 | 0 | 0 | # ob |
| 15 | 1 | 3 | -1.050000 | 3.188175495 | 1.106315515  | 4.902851743  | 0 | 0 | 0 | # ob |
| 16 | 1 | 3 | -1.050000 | 2.355525134 | 3.339943172  | 3.727147445  | 0 | 0 | 0 | # ob |
| 17 | 1 | 3 | -1.050000 | 4.928942666 | 3.343459909  | 7.955469793  | 0 | 0 | 0 | # ob |
| 18 | 1 | 3 | -1.050000 | 0.358599510 | 3.342745271  | 2.056943562  | 0 | 0 | 0 | # ob |
| 19 | 1 | 3 | -1.050000 | 2.943159518 | 3.343022387  | 6.275700930  | 0 | 0 | 0 | # ob |
| 20 | 1 | 4 | -0.950000 | 0.973817447 | 1.030057382  | 6.456311812  | 0 | 0 | 0 | # oh |
| 21 | 1 | 4 | -0.950000 | 3.559070440 | 1.017364731  | 2.229260000  | 0 | 0 | 0 | # oh |
| 22 | 1 | 3 | -1.050000 | 2.368990946 | 3.066493209  | 0.417596118  | 0 | 0 | 0 | # ob |
| 23 | 1 | 3 | -1.050000 | 4.963275993 | 3.050340270  | 4.648938892  | 0 | 0 | 0 | # ob |
| 24 | 1 | 4 | -0.950000 | 1.603365723 | -0.928489933 | 7.582229270  | 0 | 0 | 0 | # oh |
| 25 | 1 | 3 | -1.050000 | 0.199951485 | -2.961853389 | 5.162916698  | 0 | 0 | 0 | # ob |
| 26 | 1 | 4 | -0.950000 | 4.188976468 | -0.940763219 | 3.355759607  | 0 | 0 | 0 | # oh |
| 27 | 1 | 3 | -1.050000 | 2.793669734 | -2.977677046 | 0.944364434  | 0 | 0 | 0 | # ob |
| 28 | 1 | 3 | -1.050000 | 0.999937272 | 1.091158613  | 3.353842278  | 0 | 0 | 0 | # ob |
| 29 | 1 | 3 | -1.050000 | 3.573485134 | 1.098365238  | 7.587875661  | 0 | 0 | 0 | # ob |
| 30 | 1 | 3 | -1.050000 | 4.555837623 | -1.019123292 | 0.681739972  | 0 | 0 | 0 | # ob |
| 31 | 1 | 3 | -1.050000 | 0.233734585 | -3.254366293 | 1.856176368  | 0 | 0 | 0 | # ob |
| 32 | 1 | 3 | -1.050000 | 2.807687271 | -3.251063569 | 6.084357725  | 0 | 0 | 0 | # ob |
| 33 | 1 | 5 | 2.100000  | 0.877003477 | 2.720599038  | 3.452486522  | 0 | 0 | 0 | # st |
| 34 | 1 | 5 | 2.100000  | 3.449029217 | 2.729580341  | 7.680379551  | 0 | 0 | 0 | # st |
| 35 | 1 | 5 | 2.100000  | 4.372376051 | -2.638063392 | 0.744074984  | 0 | 0 | 0 | # st |
| 36 | 1 | 5 | 2.100000  | 1.713733961 | -2.640760033 | 2.131278354  | 0 | 0 | 0 | # st |
| 37 | 1 | 5 | 2.100000  | 4.286150250 | -2.631682580 | 6.359024273  | 0 | 0 | 0 | # st |
| 38 | 1 | 5 | 2.100000  | 0.790278839 | 2.727049911  | 0.617961151  | 0 | 0 | 0 | # st |
| 39 | 1 | 5 | 2.100000  | 3.378672668 | 2.723397425  | 4.839744045  | 0 | 0 | 0 | # st |
| 40 | 1 | 5 | 2.100000  | 1.784418745 | -2.634695815 | 4.971778212  | 0 | 0 | 0 | # st |
| 41 | 1 | 1 | 1.575000  | 2.564951898 | 0.057857326  | 14.792747493 | 0 | 0 | 0 | # ao |
| 42 | 1 | 1 | 1.575000  | 5.152091886 | 0.047832665  | 10.569647493 | 0 | 0 | 0 | # ao |
| 43 | 1 | 1 | 1.575000  | 0.010475843 | 0.041014554  | 16.141210963 | 0 | 0 | 0 | # ao |
| 44 | 1 | 1 | 1.575000  | 2.597479300 | 0.031026926  | 11.918102305 | 0 | 0 | 0 | # ao |
| 45 | 1 | 2 | 0.425000  | 3.116355855 | 1.425163371  | 9.911451013  | 0 | 0 | 0 | # ho |

|     |   |   |           |             |              |               |   |   |   |   |     |
|-----|---|---|-----------|-------------|--------------|---------------|---|---|---|---|-----|
| 46  | 1 | 2 | 0.425000  | 0.545922528 | 1.523504153  | 14.180912462  | 0 | 0 | 0 | # | ho  |
| 47  | 1 | 2 | 0.425000  | 4.617664323 | -1.430790090 | 12.532201022  | 0 | 0 | 0 | # | ho  |
| 48  | 1 | 2 | 0.425000  | 2.046067415 | -1.336757339 | 16.799025190  | 0 | 0 | 0 | # | ho  |
| 49  | 1 | 3 | -1.050000 | 1.974320767 | -1.017449350 | 13.358380749  | 0 | 0 | 0 | # | ob  |
| 50  | 1 | 3 | -1.050000 | 1.589283948 | -1.009534011 | 10.673429865  | 0 | 0 | 0 | # | ob  |
| 51  | 1 | 3 | -1.050000 | 4.162820410 | -1.002235530 | 14.907177115  | 0 | 0 | 0 | # | ob  |
| 52  | 1 | 3 | -1.050000 | 2.219750450 | -3.254329459 | 11.985412584  | 0 | 0 | 0 | # | ob  |
| 53  | 1 | 6 | -0.950000 | 4.804343942 | -3.253528090 | -17.594048299 | 0 | 0 | 0 | # | oht |
| 54  | 1 | 3 | -1.050000 | 0.606605783 | 1.108160884  | 9.130033991   | 0 | 0 | 0 | # | ob  |
| 55  | 1 | 3 | -1.050000 | 3.188175495 | 1.106315515  | 13.352451743  | 0 | 0 | 0 | # | ob  |
| 56  | 1 | 3 | -1.050000 | 2.355525134 | 3.339943172  | 12.176747445  | 0 | 0 | 0 | # | ob  |
| 57  | 1 | 3 | -1.050000 | 4.928942666 | 3.343459909  | 16.405069793  | 0 | 0 | 0 | # | ob  |
| 58  | 1 | 3 | -1.050000 | 0.358599510 | 3.342745271  | 10.506543562  | 0 | 0 | 0 | # | ob  |
| 59  | 1 | 3 | -1.050000 | 2.943159518 | 3.343022387  | 14.725300930  | 0 | 0 | 0 | # | ob  |
| 60  | 1 | 4 | -0.950000 | 0.973817447 | 1.030057382  | 14.905911812  | 0 | 0 | 0 | # | oh  |
| 61  | 1 | 4 | -0.950000 | 3.559070440 | 1.017364731  | 10.678860000  | 0 | 0 | 0 | # | oh  |
| 62  | 1 | 3 | -1.050000 | 2.368990946 | 3.066493209  | 8.867196118   | 0 | 0 | 0 | # | ob  |
| 63  | 1 | 3 | -1.050000 | 4.963275993 | 3.050340270  | 13.098538892  | 0 | 0 | 0 | # | ob  |
| 64  | 1 | 7 | -0.950000 | 1.603365723 | -0.928489933 | 16.031829270  | 0 | 0 | 0 | # | oho |
| 65  | 1 | 3 | -1.050000 | 0.199951485 | -2.961853389 | 13.612516698  | 0 | 0 | 0 | # | ob  |
| 66  | 1 | 4 | -0.950000 | 4.188976468 | -0.940763219 | 11.805359607  | 0 | 0 | 0 | # | oh  |
| 67  | 1 | 3 | -1.050000 | 2.793669734 | -2.977677046 | 9.393964434   | 0 | 0 | 0 | # | ob  |
| 68  | 1 | 3 | -1.050000 | 0.999937272 | 1.091158613  | 11.803442278  | 0 | 0 | 0 | # | ob  |
| 69  | 1 | 3 | -1.050000 | 3.573485134 | 1.098365238  | 16.037475661  | 0 | 0 | 0 | # | ob  |
| 70  | 1 | 3 | -1.050000 | 4.555837623 | -1.019123292 | 9.131339972   | 0 | 0 | 0 | # | ob  |
| 71  | 1 | 3 | -1.050000 | 0.233734585 | -3.254366293 | 10.305776368  | 0 | 0 | 0 | # | ob  |
| 72  | 1 | 3 | -1.050000 | 2.807687271 | -3.251063569 | 14.533957725  | 0 | 0 | 0 | # | ob  |
| 73  | 1 | 5 | 2.100000  | 0.877003477 | 2.720599038  | 11.902086522  | 0 | 0 | 0 | # | st  |
| 74  | 1 | 5 | 2.100000  | 3.449029217 | 2.729580341  | 16.129979551  | 0 | 0 | 0 | # | st  |
| 75  | 1 | 5 | 2.100000  | 4.372376051 | -2.638063392 | 9.193674984   | 0 | 0 | 0 | # | st  |
| 76  | 1 | 5 | 2.100000  | 1.713733961 | -2.640760033 | 10.580878354  | 0 | 0 | 0 | # | st  |
| 77  | 1 | 5 | 2.100000  | 4.286150250 | -2.631682580 | 14.808624273  | 0 | 0 | 0 | # | st  |
| 78  | 1 | 5 | 2.100000  | 0.790278839 | 2.727049911  | 9.067561151   | 0 | 0 | 0 | # | st  |
| 79  | 1 | 5 | 2.100000  | 3.378672668 | 2.723397425  | 13.289344045  | 0 | 0 | 0 | # | st  |
| 80  | 1 | 5 | 2.100000  | 1.784418745 | -2.634695815 | 13.421378212  | 0 | 0 | 0 | # | st  |
| 81  | 1 | 1 | 1.575000  | 2.564951898 | 0.057857326  | -10.556052507 | 0 | 0 | 0 | # | ao  |
| 82  | 1 | 1 | 1.575000  | 5.152091886 | 0.047832665  | -14.779152507 | 0 | 0 | 0 | # | ao  |
| 83  | 1 | 1 | 1.575000  | 0.010475843 | 0.041014554  | -9.207589037  | 0 | 0 | 0 | # | ao  |
| 84  | 1 | 1 | 1.575000  | 2.597479300 | 0.031026926  | -13.430697695 | 0 | 0 | 0 | # | ao  |
| 85  | 1 | 2 | 0.425000  | 3.116355855 | 1.425163371  | -15.437348987 | 0 | 0 | 0 | # | ho  |
| 86  | 1 | 2 | 0.425000  | 0.545922528 | 1.523504153  | -11.167887538 | 0 | 0 | 0 | # | ho  |
| 87  | 1 | 2 | 0.425000  | 4.617664323 | -1.430790090 | -12.816598978 | 0 | 0 | 0 | # | ho  |
| 88  | 1 | 2 | 0.425000  | 2.046067415 | -1.336757339 | -8.549774810  | 0 | 0 | 0 | # | ho  |
| 89  | 1 | 3 | -1.050000 | 1.974320767 | -1.017449350 | -11.990419251 | 0 | 0 | 0 | # | ob  |
| 90  | 1 | 3 | -1.050000 | 1.589283948 | -1.009534011 | -14.675370135 | 0 | 0 | 0 | # | ob  |
| 91  | 1 | 3 | -1.050000 | 4.162820410 | -1.002235530 | -10.441622885 | 0 | 0 | 0 | # | ob  |
| 92  | 1 | 3 | -1.050000 | 2.219750450 | -3.254329459 | -13.363387416 | 0 | 0 | 0 | # | ob  |
| 93  | 1 | 3 | -1.050000 | 4.804343942 | -3.253528090 | -9.144448299  | 0 | 0 | 0 | # | ob  |
| 94  | 1 | 3 | -1.050000 | 0.606605783 | 1.108160884  | 17.579633991  | 0 | 0 | 0 | # | ob  |
| 95  | 1 | 3 | -1.050000 | 3.188175495 | 1.106315515  | -11.996348257 | 0 | 0 | 0 | # | ob  |
| 96  | 1 | 3 | -1.050000 | 2.355525134 | 3.339943172  | -13.172052555 | 0 | 0 | 0 | # | ob  |
| 97  | 1 | 3 | -1.050000 | 4.928942666 | 3.343459909  | -8.943730207  | 0 | 0 | 0 | # | ob  |
| 98  | 1 | 6 | -0.950000 | 0.358599510 | 3.342745271  | 18.956143562  | 0 | 0 | 0 | # | oht |
| 99  | 1 | 3 | -1.050000 | 2.943159518 | 3.343022387  | -10.623499070 | 0 | 0 | 0 | # | ob  |
| 100 | 1 | 4 | -0.950000 | 0.973817447 | 1.030057382  | -10.442888188 | 0 | 0 | 0 | # | oh  |
| 101 | 1 | 7 | -0.950000 | 3.559070440 | 1.017364731  | -14.669940000 | 0 | 0 | 0 | # | oh  |
| 102 | 1 | 3 | -1.050000 | 2.368990946 | 3.066493209  | 17.316796118  | 0 | 0 | 0 | # | ob  |
| 103 | 1 | 3 | -1.050000 | 4.963275993 | 3.050340270  | -12.250261108 | 0 | 0 | 0 | # | ob  |
| 104 | 1 | 4 | -0.950000 | 1.603365723 | -0.928489933 | -9.316970730  | 0 | 0 | 0 | # | oh  |
| 105 | 1 | 3 | -1.050000 | 0.199951485 | -2.961853389 | -11.736283302 | 0 | 0 | 0 | # | ob  |
| 106 | 1 | 4 | -0.950000 | 4.188976468 | -0.940763219 | -13.543440393 | 0 | 0 | 0 | # | oh  |
| 107 | 1 | 3 | -1.050000 | 2.793669734 | -2.977677046 | -15.954835566 | 0 | 0 | 0 | # | ob  |
| 108 | 1 | 3 | -1.050000 | 0.999937272 | 1.091158613  | -13.545357722 | 0 | 0 | 0 | # | ob  |
| 109 | 1 | 3 | -1.050000 | 3.573485134 | 1.098365238  | -9.311324339  | 0 | 0 | 0 | # | ob  |
| 110 | 1 | 3 | -1.050000 | 4.555837623 | -1.019123292 | -16.217460028 | 0 | 0 | 0 | # | ob  |
| 111 | 1 | 3 | -1.050000 | 0.233734585 | -3.254366293 | -15.043023632 | 0 | 0 | 0 | # | ob  |
| 112 | 1 | 3 | -1.050000 | 2.807687271 | -3.251063569 | -10.814842275 | 0 | 0 | 0 | # | ob  |
| 113 | 1 | 5 | 2.100000  | 0.877003477 | 2.720599038  | -13.446713478 | 0 | 0 | 0 | # | st  |
| 114 | 1 | 5 | 2.100000  | 3.449029217 | 2.729580341  | -9.218820449  | 0 | 0 | 0 | # | st  |
| 115 | 1 | 5 | 2.100000  | 4.372376051 | -2.638063392 | -16.155125016 | 0 | 0 | 0 | # | st  |
| 116 | 1 | 5 | 2.100000  | 1.713733961 | -2.640760033 | -14.767921646 | 0 | 0 | 0 | # | st  |
| 117 | 1 | 5 | 2.100000  | 4.286150250 | -2.631682580 | -10.540175727 | 0 | 0 | 0 | # | st  |
| 118 | 1 | 5 | 2.100000  | 0.790278839 | 2.727049911  | 17.517161151  | 0 | 0 | 0 | # | st  |
| 119 | 1 | 5 | 2.100000  | 3.378672668 | 2.723397425  | -12.059455955 | 0 | 0 | 0 | # | st  |
| 120 | 1 | 5 | 2.100000  | 1.784418745 | -2.634695815 | -11.927421788 | 0 | 0 | 0 | # | st  |
| 121 | 1 | 1 | 1.575000  | 2.564951898 | 0.057857326  | -2.106452507  | 0 | 0 | 0 | # | ao  |
| 122 | 1 | 1 | 1.575000  | 5.152091886 | 0.047832665  | -6.329552507  | 0 | 0 | 0 | # | ao  |
| 123 | 1 | 1 | 1.575000  | 0.010475843 | 0.041014554  | -0.757989037  | 0 | 0 | 0 | # | ao  |
| 124 | 1 | 1 | 1.575000  | 2.597479300 | 0.031026926  | -4.981097695  | 0 | 0 | 0 | # | ao  |
| 125 | 1 | 2 | 0.425000  | 3.116355855 | 1.425163371  | -6.987748987  | 0 | 0 | 0 | # | ho  |
| 126 | 1 | 2 | 0.425000  | 0.545922528 | 1.523504153  | -2.718287538  | 0 | 0 | 0 | # | ho  |
| 127 | 1 | 2 | 0.425000  | 4.617664323 | -1.430790090 | -4.366998978  | 0 | 0 | 0 | # | ho  |
| 128 | 1 | 2 | 0.425000  | 2.046067415 | -1.336757339 | -0.100174810  | 0 | 0 | 0 | # | ho  |
| 129 | 1 | 3 | -1.050000 | 1.974320767 | -1.017449350 | -3.540819251  | 0 | 0 | 0 | # | ob  |
| 130 | 1 | 3 | -1.050000 | 1.589283948 | -1.009534011 | -6.225770135  | 0 | 0 | 0 | # | ob  |
| 131 | 1 | 3 | -1.050000 | 4.162820410 | -1.002235530 | -1.992022885  | 0 | 0 | 0 | # | ob  |
| 132 | 1 | 3 | -1.050000 | 2.219750450 | -3.254329459 | -4.913787416  | 0 | 0 | 0 | # | ob  |
| 133 | 1 | 3 | -1.050000 | 4.804343942 | -3.253528090 | -0.694848299  | 0 | 0 | 0 | # | ob  |
| 134 | 1 | 3 | -1.050000 | 0.606605783 | 1.108160884  | -7.769166009  | 0 | 0 | 0 | # | ob  |
| 135 | 1 | 3 | -1.050000 | 3.188175495 | 1.106315515  | -3.546748257  | 0 | 0 | 0 | # | ob  |
| 136 | 1 | 3 | -1.050000 | 2.355525134 | 3.339943172  | -4.722452555  | 0 | 0 | 0 | # | ob  |
| 137 | 1 | 3 | -1.050000 | 4.928942666 | 3.343459909  | -0.494130207  | 0 | 0 | 0 | # | ob  |
| 138 | 1 | 3 | -1.050000 | 0.358599510 | 3.342745271  | -6.392656438  | 0 | 0 | 0 | # | ob  |

|     |   |   |           |              |              |               |   |   |   |     |
|-----|---|---|-----------|--------------|--------------|---------------|---|---|---|-----|
| 139 | 1 | 3 | -1.050000 | 2.943159518  | 3.343022387  | -2.173899070  | 0 | 0 | 0 | ob  |
| 140 | 1 | 4 | -0.950000 | 0.973817447  | 1.030057382  | -1.993288188  | 0 | 0 | 0 | oh  |
| 141 | 1 | 4 | -0.950000 | 3.559070440  | 1.017364731  | -6.220340000  | 0 | 0 | 0 | oh  |
| 142 | 1 | 3 | -1.050000 | 2.368990946  | 3.066493209  | -8.032003882  | 0 | 0 | 0 | ob  |
| 143 | 1 | 3 | -1.050000 | 4.963275993  | 3.050340270  | -3.800661108  | 0 | 0 | 0 | ob  |
| 144 | 1 | 4 | -0.950000 | 1.603365723  | -0.928489933 | -0.867370730  | 0 | 0 | 0 | oh  |
| 145 | 1 | 3 | -1.050000 | 0.199951485  | -2.961853389 | -3.286683302  | 0 | 0 | 0 | ob  |
| 146 | 1 | 4 | -0.950000 | 4.188976468  | -0.940763219 | -5.093840393  | 0 | 0 | 0 | oh  |
| 147 | 1 | 3 | -1.050000 | 2.793669734  | -2.977677046 | -7.505235566  | 0 | 0 | 0 | ob  |
| 148 | 1 | 3 | -1.050000 | 0.999937272  | 1.091158613  | -5.095757722  | 0 | 0 | 0 | ob  |
| 149 | 1 | 3 | -1.050000 | 3.573485134  | 1.098365238  | -0.861724339  | 0 | 0 | 0 | ob  |
| 150 | 1 | 3 | -1.050000 | 4.555837623  | -1.019123292 | -7.767860028  | 0 | 0 | 0 | ob  |
| 151 | 1 | 3 | -1.050000 | 0.233734585  | -3.254366293 | -6.593423632  | 0 | 0 | 0 | ob  |
| 152 | 1 | 3 | -1.050000 | 2.807687271  | -3.251063569 | -2.365242275  | 0 | 0 | 0 | ob  |
| 153 | 1 | 5 | 2.100000  | 0.877003477  | 2.720599038  | -4.997113478  | 0 | 0 | 0 | st  |
| 154 | 1 | 5 | 2.100000  | 3.449029217  | 2.729580341  | -0.769220449  | 0 | 0 | 0 | st  |
| 155 | 1 | 5 | 2.100000  | 4.372376051  | -2.638063392 | -7.705525016  | 0 | 0 | 0 | st  |
| 156 | 1 | 5 | 2.100000  | 1.713733961  | -2.640760033 | -6.318321646  | 0 | 0 | 0 | st  |
| 157 | 1 | 5 | 2.100000  | 4.286150250  | -2.631682580 | -2.090575727  | 0 | 0 | 0 | st  |
| 158 | 1 | 5 | 2.100000  | 0.790278839  | 2.727049911  | -7.831638849  | 0 | 0 | 0 | st  |
| 159 | 1 | 5 | 2.100000  | 3.378672668  | 2.723397425  | -3.609855955  | 0 | 0 | 0 | st  |
| 160 | 1 | 5 | 2.100000  | 1.784418745  | -2.634695815 | -3.477821788  | 0 | 0 | 0 | st  |
| 161 | 1 | 6 | -0.950000 | 4.846051183  | -2.634071151 | 16.634714390  | 0 | 0 | 0 | oht |
| 162 | 1 | 6 | -0.950000 | 0.590206465  | 2.961484659  | -15.319631379 | 0 | 0 | 0 | oht |
| 163 | 1 | 2 | 0.425000  | 0.429963167  | 3.078655077  | -16.411736324 | 0 | 0 | 0 | ho  |
| 164 | 1 | 2 | 0.425000  | 5.010789943  | -2.983958974 | -18.650841835 | 0 | 0 | 0 | ho  |
| 165 | 1 | 2 | 0.425000  | 0.435438959  | 3.250098365  | 20.059598264  | 0 | 0 | 0 | ho  |
| 166 | 1 | 2 | 0.425000  | 4.457833436  | -2.533686233 | 17.669755394  | 0 | 0 | 0 | ho  |
| 167 | 1 | 1 | 1.575000  | 7.727751898  | 0.057857326  | 6.343147493   | 0 | 0 | 0 | ao  |
| 168 | 1 | 1 | 1.575000  | 10.314891886 | 0.047832665  | 2.120047493   | 0 | 0 | 0 | ao  |
| 169 | 1 | 1 | 1.575000  | 5.173275843  | 0.041014554  | 7.691610963   | 0 | 0 | 0 | ao  |
| 170 | 1 | 1 | 1.575000  | 7.760279300  | 0.031026926  | 3.468502305   | 0 | 0 | 0 | ao  |
| 171 | 1 | 2 | 0.425000  | 8.279155855  | 1.425163371  | 1.461851013   | 0 | 0 | 0 | ho  |
| 172 | 1 | 2 | 0.425000  | 5.708722528  | 1.523504153  | 5.731312462   | 0 | 0 | 0 | ho  |
| 173 | 1 | 2 | 0.425000  | 9.780464323  | -1.430790090 | 4.082601022   | 0 | 0 | 0 | ho  |
| 174 | 1 | 2 | 0.425000  | 7.208867415  | -1.336757339 | 8.349425190   | 0 | 0 | 0 | ho  |
| 175 | 1 | 3 | -1.050000 | 7.137120767  | -1.017449350 | 4.908780749   | 0 | 0 | 0 | ob  |
| 176 | 1 | 3 | -1.050000 | 6.752083948  | -1.009534011 | 2.223829865   | 0 | 0 | 0 | ob  |
| 177 | 1 | 3 | -1.050000 | 9.325620410  | -1.002235530 | 6.457577115   | 0 | 0 | 0 | ob  |
| 178 | 1 | 3 | -1.050000 | 7.382550450  | -3.254329459 | 3.535812584   | 0 | 0 | 0 | ob  |
| 179 | 1 | 3 | -1.050000 | 9.967143942  | -3.253528090 | 7.754751701   | 0 | 0 | 0 | ob  |
| 180 | 1 | 3 | -1.050000 | 5.769405783  | 1.108160884  | 0.680433991   | 0 | 0 | 0 | ob  |
| 181 | 1 | 3 | -1.050000 | 8.350975495  | 1.106315515  | 4.902851743   | 0 | 0 | 0 | ob  |
| 182 | 1 | 3 | -1.050000 | 7.518325134  | 3.339943172  | 3.727147445   | 0 | 0 | 0 | ob  |
| 183 | 1 | 3 | -1.050000 | 10.091742666 | 3.343459909  | 7.955469793   | 0 | 0 | 0 | ob  |
| 184 | 1 | 3 | -1.050000 | 5.521399510  | 3.342745271  | 2.056943562   | 0 | 0 | 0 | ob  |
| 185 | 1 | 3 | -1.050000 | 8.105959518  | 3.343022387  | 6.275700930   | 0 | 0 | 0 | ob  |
| 186 | 1 | 4 | -0.950000 | 6.136617447  | 1.030057382  | 6.456311812   | 0 | 0 | 0 | oh  |
| 187 | 1 | 4 | -0.950000 | 8.721870440  | 1.017364731  | 2.229260000   | 0 | 0 | 0 | oh  |
| 188 | 1 | 3 | -1.050000 | 7.531790946  | 3.066493209  | 0.417596118   | 0 | 0 | 0 | ob  |
| 189 | 1 | 3 | -1.050000 | 10.126075993 | 3.050340270  | 4.648938892   | 0 | 0 | 0 | ob  |
| 190 | 1 | 4 | -0.950000 | 6.766165723  | -0.928489933 | 7.582229270   | 0 | 0 | 0 | oh  |
| 191 | 1 | 3 | -1.050000 | 5.362751485  | -2.961853389 | 5.162916698   | 0 | 0 | 0 | ob  |
| 192 | 1 | 4 | -0.950000 | 9.351776468  | -0.940763219 | 3.355759607   | 0 | 0 | 0 | oh  |
| 193 | 1 | 3 | -1.050000 | 7.956469734  | -2.977677046 | 0.944364434   | 0 | 0 | 0 | ob  |
| 194 | 1 | 3 | -1.050000 | 6.162737272  | 1.091158613  | 3.353842278   | 0 | 0 | 0 | ob  |
| 195 | 1 | 3 | -1.050000 | 8.736285134  | 1.098365238  | 7.587875661   | 0 | 0 | 0 | ob  |
| 196 | 1 | 3 | -1.050000 | 9.718637623  | -1.019123292 | 0.681739972   | 0 | 0 | 0 | ob  |
| 197 | 1 | 3 | -1.050000 | 5.396534585  | -3.254366293 | 1.856176368   | 0 | 0 | 0 | ob  |
| 198 | 1 | 3 | -1.050000 | 7.970487271  | -3.251063569 | 6.084357725   | 0 | 0 | 0 | ob  |
| 199 | 1 | 5 | 2.100000  | 6.039803477  | 2.720599038  | 3.452486522   | 0 | 0 | 0 | st  |
| 200 | 1 | 5 | 2.100000  | 8.611829217  | 2.729580341  | 7.680379551   | 0 | 0 | 0 | st  |
| 201 | 1 | 5 | 2.100000  | 9.535176051  | -2.638063392 | 0.744074984   | 0 | 0 | 0 | st  |
| 202 | 1 | 5 | 2.100000  | 6.876533961  | -2.640760033 | 2.131278354   | 0 | 0 | 0 | st  |
| 203 | 1 | 5 | 2.100000  | 9.448950250  | -2.631682580 | 6.359024273   | 0 | 0 | 0 | st  |
| 204 | 1 | 5 | 2.100000  | 5.953078839  | 2.727049911  | 0.617961151   | 0 | 0 | 0 | st  |
| 205 | 1 | 5 | 2.100000  | 8.541742668  | 2.723397425  | 4.839744045   | 0 | 0 | 0 | st  |
| 206 | 1 | 5 | 2.100000  | 6.947218745  | -2.634695815 | 4.971778212   | 0 | 0 | 0 | st  |
| 207 | 1 | 1 | 1.575000  | 7.727751898  | 0.057857326  | 14.792747493  | 0 | 0 | 0 | ao  |
| 208 | 1 | 1 | 1.575000  | 10.314891886 | 0.047832665  | 10.569647493  | 0 | 0 | 0 | ao  |
| 209 | 1 | 1 | 1.575000  | 5.173275843  | 0.041014554  | 16.141210963  | 0 | 0 | 0 | ao  |
| 210 | 1 | 1 | 1.575000  | 7.760279300  | 0.031026926  | 11.918102305  | 0 | 0 | 0 | ao  |
| 211 | 1 | 2 | 0.425000  | 8.279155855  | 1.425163371  | 9.911451013   | 0 | 0 | 0 | ho  |
| 212 | 1 | 2 | 0.425000  | 5.708722528  | 1.523504153  | 14.180912462  | 0 | 0 | 0 | ho  |
| 213 | 1 | 2 | 0.425000  | 9.780464323  | -1.430790090 | 12.532201022  | 0 | 0 | 0 | ho  |
| 214 | 1 | 2 | 0.425000  | 7.208867415  | -1.336757339 | 16.799025190  | 0 | 0 | 0 | ho  |
| 215 | 1 | 3 | -1.050000 | 7.137120767  | -1.017449350 | 13.358380749  | 0 | 0 | 0 | ob  |
| 216 | 1 | 3 | -1.050000 | 6.752083948  | -1.009534011 | 10.673429865  | 0 | 0 | 0 | ob  |
| 217 | 1 | 3 | -1.050000 | 9.325620410  | -1.002235530 | 14.907177115  | 0 | 0 | 0 | ob  |
| 218 | 1 | 3 | -1.050000 | 7.382550450  | -3.254329459 | 11.985412584  | 0 | 0 | 0 | ob  |
| 219 | 1 | 6 | -0.950000 | 9.967143942  | -3.253528090 | -17.594048299 | 0 | 0 | 0 | oht |
| 220 | 1 | 3 | -1.050000 | 5.769405783  | 1.108160884  | 9.130033991   | 0 | 0 | 0 | ob  |
| 221 | 1 | 3 | -1.050000 | 8.350975495  | 1.106315515  | 13.352451743  | 0 | 0 | 0 | ob  |
| 222 | 1 | 3 | -1.050000 | 7.518325134  | 3.339943172  | 12.176747445  | 0 | 0 | 0 | ob  |
| 223 | 1 | 3 | -1.050000 | 10.091742666 | 3.343459909  | 16.405069793  | 0 | 0 | 0 | ob  |
| 224 | 1 | 3 | -1.050000 | 5.521399510  | 3.342745271  | 10.506543562  | 0 | 0 | 0 | ob  |
| 225 | 1 | 3 | -1.050000 | 8.105959518  | 3.343022387  | 14.725300930  | 0 | 0 | 0 | ob  |
| 226 | 1 | 4 | -0.950000 | 6.136617447  | 1.030057382  | 14.905911812  | 0 | 0 | 0 | oh  |
| 227 | 1 | 4 | -0.950000 | 8.721870440  | 1.017364731  | 10.678860000  | 0 | 0 | 0 | oh  |
| 228 | 1 | 3 | -1.050000 | 7.531790946  | 3.066493209  | 8.867196118   | 0 | 0 | 0 | ob  |
| 229 | 1 | 3 | -1.050000 | 10.126075993 | 3.050340270  | 13.098538892  | 0 | 0 | 0 | ob  |
| 230 | 1 | 7 | -0.950000 | 6.766165723  | -0.928489933 | 16.031829270  | 0 | 0 | 0 | oho |
| 231 | 1 | 3 | -1.050000 | 5.362751485  | -2.961853389 | 13.612516698  | 0 | 0 | 0 | ob  |

|     |   |   |           |              |              |               |   |   |   |     |
|-----|---|---|-----------|--------------|--------------|---------------|---|---|---|-----|
| 232 | 1 | 4 | -0.950000 | 9.351776468  | -0.940763219 | 11.805359607  | 0 | 0 | 0 | oh  |
| 233 | 1 | 3 | -1.050000 | 7.956469734  | -2.977677046 | 9.393964434   | 0 | 0 | 0 | ob  |
| 234 | 1 | 3 | -1.050000 | 6.162737272  | 1.091158613  | 11.803442278  | 0 | 0 | 0 | ob  |
| 235 | 1 | 3 | -1.050000 | 8.736285134  | 1.098365238  | 16.037475661  | 0 | 0 | 0 | ob  |
| 236 | 1 | 3 | -1.050000 | 9.718637623  | -1.019123292 | 9.131339972   | 0 | 0 | 0 | ob  |
| 237 | 1 | 3 | -1.050000 | 5.396534585  | -3.254366293 | 10.305776368  | 0 | 0 | 0 | ob  |
| 238 | 1 | 3 | -1.050000 | 7.970487271  | -3.251063569 | 14.533957725  | 0 | 0 | 0 | ob  |
| 239 | 1 | 5 | 2.100000  | 6.039803477  | 2.720599038  | 11.902086522  | 0 | 0 | 0 | st  |
| 240 | 1 | 5 | 2.100000  | 8.611829217  | 2.729580341  | 16.129979551  | 0 | 0 | 0 | st  |
| 241 | 1 | 5 | 2.100000  | 9.535176051  | -2.638063392 | 9.193674984   | 0 | 0 | 0 | st  |
| 242 | 1 | 5 | 2.100000  | 6.876533961  | -2.640760033 | 10.580878354  | 0 | 0 | 0 | st  |
| 243 | 1 | 5 | 2.100000  | 9.448950250  | -2.631682580 | 14.808624273  | 0 | 0 | 0 | st  |
| 244 | 1 | 5 | 2.100000  | 5.953078839  | 2.727049911  | 9.067561151   | 0 | 0 | 0 | st  |
| 245 | 1 | 5 | 2.100000  | 8.541472668  | 2.723397425  | 13.289344045  | 0 | 0 | 0 | st  |
| 246 | 1 | 5 | 2.100000  | 6.947218745  | -2.634695815 | 13.421378212  | 0 | 0 | 0 | st  |
| 247 | 1 | 1 | 1.575000  | 7.727751898  | 0.057857326  | -10.556052507 | 0 | 0 | 0 | ao  |
| 248 | 1 | 1 | 1.575000  | 10.314891886 | 0.047832665  | -14.779152507 | 0 | 0 | 0 | ao  |
| 249 | 1 | 1 | 1.575000  | 5.173275843  | 0.041014554  | -9.207589037  | 0 | 0 | 0 | ao  |
| 250 | 1 | 1 | 1.575000  | 7.760279300  | 0.031026926  | -13.430697695 | 0 | 0 | 0 | ao  |
| 251 | 1 | 2 | 0.425000  | 8.279155855  | 1.425163371  | -15.437348987 | 0 | 0 | 0 | ho  |
| 252 | 1 | 2 | 0.425000  | 5.708722528  | 1.523504153  | -11.167887538 | 0 | 0 | 0 | ho  |
| 253 | 1 | 2 | 0.425000  | 9.780464323  | -1.430790090 | -12.816598978 | 0 | 0 | 0 | ho  |
| 254 | 1 | 2 | 0.425000  | 7.208867415  | -1.336757339 | -8.549774810  | 0 | 0 | 0 | ho  |
| 255 | 1 | 3 | -1.050000 | 7.137120767  | -1.017449350 | -11.990419251 | 0 | 0 | 0 | ob  |
| 256 | 1 | 3 | -1.050000 | 6.752083948  | -1.009534011 | -14.675370135 | 0 | 0 | 0 | ob  |
| 257 | 1 | 3 | -1.050000 | 9.325620410  | -1.002235530 | -10.441622885 | 0 | 0 | 0 | ob  |
| 258 | 1 | 3 | -1.050000 | 7.382550450  | -3.254329459 | -13.363387416 | 0 | 0 | 0 | ob  |
| 259 | 1 | 3 | -1.050000 | 9.967143942  | -3.253528090 | -9.144448299  | 0 | 0 | 0 | ob  |
| 260 | 1 | 3 | -1.050000 | 5.769405783  | 1.108160884  | 17.579633991  | 0 | 0 | 0 | ob  |
| 261 | 1 | 3 | -1.050000 | 8.350975495  | 1.106315515  | -11.996348257 | 0 | 0 | 0 | ob  |
| 262 | 1 | 3 | -1.050000 | 7.518325134  | 3.339943172  | -13.172052555 | 0 | 0 | 0 | ob  |
| 263 | 1 | 3 | -1.050000 | 10.091742666 | 3.343459909  | -8.943730207  | 0 | 0 | 0 | ob  |
| 264 | 1 | 6 | -0.950000 | 5.521399510  | 3.342745271  | 18.956143562  | 0 | 0 | 0 | oht |
| 265 | 1 | 3 | -1.050000 | 8.105959518  | 3.343022387  | -10.623499070 | 0 | 0 | 0 | ob  |
| 266 | 1 | 4 | -0.950000 | 6.136617447  | 1.030057382  | -10.442888188 | 0 | 0 | 0 | oh  |
| 267 | 1 | 7 | -0.950000 | 8.721870440  | 1.017364731  | -14.669940000 | 0 | 0 | 0 | oho |
| 268 | 1 | 3 | -1.050000 | 7.531790946  | 3.066493209  | 17.316796118  | 0 | 0 | 0 | ob  |
| 269 | 1 | 3 | -1.050000 | 10.126075993 | 3.050340270  | -12.250261108 | 0 | 0 | 0 | ob  |
| 270 | 1 | 4 | -0.950000 | 6.766165723  | -0.928489933 | -9.316970730  | 0 | 0 | 0 | oh  |
| 271 | 1 | 3 | -1.050000 | 5.362751485  | -2.961853389 | -11.736283302 | 0 | 0 | 0 | ob  |
| 272 | 1 | 4 | -0.950000 | 9.351776468  | -0.940763219 | -13.543440393 | 0 | 0 | 0 | oh  |
| 273 | 1 | 3 | -1.050000 | 7.956469734  | -2.977677046 | -15.954835566 | 0 | 0 | 0 | ob  |
| 274 | 1 | 3 | -1.050000 | 6.162737272  | 1.091158613  | -13.545357722 | 0 | 0 | 0 | ob  |
| 275 | 1 | 3 | -1.050000 | 8.736285134  | 1.098365238  | -9.311324339  | 0 | 0 | 0 | ob  |
| 276 | 1 | 3 | -1.050000 | 9.718637623  | -1.019123292 | -16.217460028 | 0 | 0 | 0 | ob  |
| 277 | 1 | 3 | -1.050000 | 5.396534585  | -3.254366293 | -15.043023632 | 0 | 0 | 0 | ob  |
| 278 | 1 | 3 | -1.050000 | 7.970487271  | -3.251063569 | -10.814842275 | 0 | 0 | 0 | ob  |
| 279 | 1 | 5 | 2.100000  | 6.039803477  | 2.720599038  | -13.446713478 | 0 | 0 | 0 | st  |
| 280 | 1 | 5 | 2.100000  | 8.611829217  | 2.729580341  | -9.218820449  | 0 | 0 | 0 | st  |
| 281 | 1 | 5 | 2.100000  | 9.535176051  | -2.638063392 | -16.155125016 | 0 | 0 | 0 | st  |
| 282 | 1 | 5 | 2.100000  | 6.876533961  | -2.640760033 | -14.767921646 | 0 | 0 | 0 | st  |
| 283 | 1 | 5 | 2.100000  | 9.448950250  | -2.631682580 | -10.540175727 | 0 | 0 | 0 | st  |
| 284 | 1 | 5 | 2.100000  | 5.953078839  | 2.727049911  | 17.517161151  | 0 | 0 | 0 | st  |
| 285 | 1 | 5 | 2.100000  | 8.541472668  | 2.723397425  | -12.059455955 | 0 | 0 | 0 | st  |
| 286 | 1 | 5 | 2.100000  | 6.947218745  | -2.634695815 | -11.927421788 | 0 | 0 | 0 | st  |
| 287 | 1 | 1 | 1.575000  | 7.727751898  | 0.057857326  | -2.106452507  | 0 | 0 | 0 | ao  |
| 288 | 1 | 1 | 1.575000  | 10.314891886 | 0.047832665  | -6.329552507  | 0 | 0 | 0 | ao  |
| 289 | 1 | 1 | 1.575000  | 5.173275843  | 0.041014554  | -0.757989037  | 0 | 0 | 0 | ao  |
| 290 | 1 | 1 | 1.575000  | 7.760279300  | 0.031026926  | -4.981097695  | 0 | 0 | 0 | ao  |
| 291 | 1 | 2 | 0.425000  | 8.279155855  | 1.425163371  | -6.987748987  | 0 | 0 | 0 | ho  |
| 292 | 1 | 2 | 0.425000  | 5.708722528  | 1.523504153  | -2.718287538  | 0 | 0 | 0 | ho  |
| 293 | 1 | 2 | 0.425000  | 9.780464323  | -1.430790090 | -4.366998978  | 0 | 0 | 0 | ho  |
| 294 | 1 | 2 | 0.425000  | 7.208867415  | -1.336757339 | -0.100174810  | 0 | 0 | 0 | ho  |
| 295 | 1 | 3 | -1.050000 | 7.137120767  | -1.017449350 | -3.540819251  | 0 | 0 | 0 | ob  |
| 296 | 1 | 3 | -1.050000 | 6.752083948  | -1.009534011 | -6.225770135  | 0 | 0 | 0 | ob  |
| 297 | 1 | 3 | -1.050000 | 9.325620410  | -1.002235530 | -1.992022885  | 0 | 0 | 0 | ob  |
| 298 | 1 | 3 | -1.050000 | 7.382550450  | -3.254329459 | -4.913787416  | 0 | 0 | 0 | ob  |
| 299 | 1 | 3 | -1.050000 | 9.967143942  | -3.253528090 | -0.694848299  | 0 | 0 | 0 | ob  |
| 300 | 1 | 3 | -1.050000 | 5.769405783  | 1.108160884  | -7.769166009  | 0 | 0 | 0 | ob  |
| 301 | 1 | 3 | -1.050000 | 8.350975495  | 1.106315515  | -3.546748257  | 0 | 0 | 0 | ob  |
| 302 | 1 | 3 | -1.050000 | 7.518325134  | 3.339943172  | -4.722452555  | 0 | 0 | 0 | ob  |
| 303 | 1 | 3 | -1.050000 | 10.091742666 | 3.343459909  | -0.494130207  | 0 | 0 | 0 | ob  |
| 304 | 1 | 3 | -1.050000 | 5.521399510  | 3.342745271  | -6.392656438  | 0 | 0 | 0 | ob  |
| 305 | 1 | 3 | -1.050000 | 8.105959518  | 3.343022387  | -2.173899070  | 0 | 0 | 0 | ob  |
| 306 | 1 | 4 | -0.950000 | 6.136617447  | 1.030057382  | -1.993288188  | 0 | 0 | 0 | oh  |
| 307 | 1 | 4 | -0.950000 | 8.721870440  | 1.017364731  | -6.220340000  | 0 | 0 | 0 | oh  |
| 308 | 1 | 3 | -1.050000 | 7.531790946  | 3.066493209  | -8.032003882  | 0 | 0 | 0 | ob  |
| 309 | 1 | 3 | -1.050000 | 10.126075993 | 3.050340270  | -3.800661108  | 0 | 0 | 0 | ob  |
| 310 | 1 | 4 | -0.950000 | 6.766165723  | -0.928489933 | -0.867370730  | 0 | 0 | 0 | oh  |
| 311 | 1 | 3 | -1.050000 | 5.362751485  | -2.961853389 | -3.286683302  | 0 | 0 | 0 | ob  |
| 312 | 1 | 4 | -0.950000 | 9.351776468  | -0.940763219 | -5.093840393  | 0 | 0 | 0 | oh  |
| 313 | 1 | 3 | -1.050000 | 7.956469734  | -2.977677046 | -7.505235566  | 0 | 0 | 0 | ob  |
| 314 | 1 | 3 | -1.050000 | 6.162737272  | 1.091158613  | -5.095757722  | 0 | 0 | 0 | ob  |
| 315 | 1 | 3 | -1.050000 | 8.736285134  | 1.098365238  | -0.861724339  | 0 | 0 | 0 | ob  |
| 316 | 1 | 3 | -1.050000 | 9.718637623  | -1.019123292 | -7.767860028  | 0 | 0 | 0 | ob  |
| 317 | 1 | 3 | -1.050000 | 5.396534585  | -3.254366293 | -6.593423632  | 0 | 0 | 0 | ob  |
| 318 | 1 | 3 | -1.050000 | 7.970487271  | -3.251063569 | -2.365242275  | 0 | 0 | 0 | ob  |
| 319 | 1 | 5 | 2.100000  | 6.039803477  | 2.720599038  | -4.997113478  | 0 | 0 | 0 | st  |
| 320 | 1 | 5 | 2.100000  | 8.611829217  | 2.729580341  | -0.769220449  | 0 | 0 | 0 | st  |
| 321 | 1 | 5 | 2.100000  | 9.535176051  | -2.638063392 | -7.705525016  | 0 | 0 | 0 | st  |
| 322 | 1 | 5 | 2.100000  | 6.876533961  | -2.640760033 | -6.318321646  | 0 | 0 | 0 | st  |
| 323 | 1 | 5 | 2.100000  | 9.448950250  | -2.631682580 | -2.090575727  | 0 | 0 | 0 | st  |
| 324 | 1 | 5 | 2.100000  | 5.953078839  | 2.727049911  | -7.831638849  | 0 | 0 | 0 | st  |

|     |   |   |           |              |              |               |   |   |   |   |     |
|-----|---|---|-----------|--------------|--------------|---------------|---|---|---|---|-----|
| 325 | 1 | 5 | 2.100000  | 8.541472668  | 2.723397425  | -3.609855955  | 0 | 0 | 0 | # | st  |
| 326 | 1 | 5 | 2.100000  | 6.947218745  | -2.634695815 | -3.477821788  | 0 | 0 | 0 | # | st  |
| 327 | 1 | 6 | -0.950000 | 10.008851183 | -2.634071151 | 16.634714390  | 0 | 0 | 0 | # | oht |
| 328 | 1 | 6 | -0.950000 | 5.753006465  | 2.961484659  | -15.319631379 | 0 | 0 | 0 | # | oht |
| 329 | 1 | 2 | 0.425000  | 5.592763167  | 3.078655077  | -16.411736324 | 0 | 0 | 0 | # | ho  |
| 330 | 1 | 2 | 0.425000  | 10.173589943 | -2.983958974 | -18.650841835 | 0 | 0 | 0 | # | ho  |
| 331 | 1 | 2 | 0.425000  | 5.598238959  | 3.250098365  | 20.059598264  | 0 | 0 | 0 | # | ho  |
| 332 | 1 | 2 | 0.425000  | 9.620633436  | -2.533686233 | 17.669755394  | 0 | 0 | 0 | # | ho  |
| 333 | 1 | 1 | 1.575000  | 12.890551898 | 0.057857326  | 6.343147493   | 0 | 0 | 0 | # | ao  |
| 334 | 1 | 1 | 1.575000  | 15.477691886 | 0.047832665  | 2.120047493   | 0 | 0 | 0 | # | ao  |
| 335 | 1 | 1 | 1.575000  | 10.336075843 | 0.041014554  | 7.691610963   | 0 | 0 | 0 | # | ao  |
| 336 | 1 | 1 | 1.575000  | 12.923079300 | 0.031026926  | 3.468502305   | 0 | 0 | 0 | # | ao  |
| 337 | 1 | 2 | 0.425000  | 13.441955855 | 1.425163371  | 1.461851013   | 0 | 0 | 0 | # | ho  |
| 338 | 1 | 2 | 0.425000  | 10.871522528 | 1.523504153  | 5.731312462   | 0 | 0 | 0 | # | ho  |
| 339 | 1 | 2 | 0.425000  | 14.943264323 | -1.430790090 | 4.082601022   | 0 | 0 | 0 | # | ho  |
| 340 | 1 | 2 | 0.425000  | 12.371667415 | -1.336757339 | 8.349425190   | 0 | 0 | 0 | # | ho  |
| 341 | 1 | 3 | -1.050000 | 12.299920767 | -1.017449350 | 4.908780749   | 0 | 0 | 0 | # | ob  |
| 342 | 1 | 3 | -1.050000 | 11.914883948 | -1.009534011 | 2.223829865   | 0 | 0 | 0 | # | ob  |
| 343 | 1 | 3 | -1.050000 | 14.488420410 | -1.002235530 | 6.457577115   | 0 | 0 | 0 | # | ob  |
| 344 | 1 | 3 | -1.050000 | 12.545350450 | -3.254329459 | 3.535812584   | 0 | 0 | 0 | # | ob  |
| 345 | 1 | 3 | -1.050000 | 15.129943942 | -3.253528090 | 7.754751701   | 0 | 0 | 0 | # | ob  |
| 346 | 1 | 3 | -1.050000 | 10.932205783 | 1.108160884  | 0.680433991   | 0 | 0 | 0 | # | ob  |
| 347 | 1 | 3 | -1.050000 | 13.513775495 | 1.106315515  | 4.902851743   | 0 | 0 | 0 | # | ob  |
| 348 | 1 | 3 | -1.050000 | 12.681125134 | 3.339943172  | 3.727147445   | 0 | 0 | 0 | # | ob  |
| 349 | 1 | 3 | -1.050000 | 15.254542666 | 3.343459909  | 7.955469793   | 0 | 0 | 0 | # | ob  |
| 350 | 1 | 3 | -1.050000 | 10.684199510 | 3.342745271  | 2.056943562   | 0 | 0 | 0 | # | ob  |
| 351 | 1 | 3 | -1.050000 | 13.268759518 | 3.343022387  | 6.275700930   | 0 | 0 | 0 | # | ob  |
| 352 | 1 | 4 | -0.950000 | 11.299417447 | 1.030057382  | 6.456311812   | 0 | 0 | 0 | # | oh  |
| 353 | 1 | 4 | -0.950000 | 13.884670440 | 1.017364731  | 2.229260000   | 0 | 0 | 0 | # | oh  |
| 354 | 1 | 3 | -1.050000 | 12.694590946 | 3.066493209  | 0.417596118   | 0 | 0 | 0 | # | ob  |
| 355 | 1 | 3 | -1.050000 | 15.288875993 | 3.050340270  | 4.648938892   | 0 | 0 | 0 | # | ob  |
| 356 | 1 | 4 | -0.950000 | 11.928965723 | -0.928489933 | 7.582229270   | 0 | 0 | 0 | # | oh  |
| 357 | 1 | 3 | -1.050000 | 10.525551485 | -2.961853389 | 5.162916698   | 0 | 0 | 0 | # | ob  |
| 358 | 1 | 4 | -0.950000 | 14.514576468 | -0.940763219 | 3.355759607   | 0 | 0 | 0 | # | oh  |
| 359 | 1 | 3 | -1.050000 | 13.119269734 | -2.977677046 | 0.944364434   | 0 | 0 | 0 | # | ob  |
| 360 | 1 | 3 | -1.050000 | 11.325537272 | 1.091158613  | 3.353842278   | 0 | 0 | 0 | # | ob  |
| 361 | 1 | 3 | -1.050000 | 13.899085134 | 1.098365238  | 7.587875661   | 0 | 0 | 0 | # | ob  |
| 362 | 1 | 3 | -1.050000 | 14.881437623 | -1.019123292 | 0.681739972   | 0 | 0 | 0 | # | ob  |
| 363 | 1 | 3 | -1.050000 | 10.559334585 | -3.254366293 | 1.856176368   | 0 | 0 | 0 | # | ob  |
| 364 | 1 | 3 | -1.050000 | 13.133287271 | -3.251063569 | 6.084357725   | 0 | 0 | 0 | # | ob  |
| 365 | 1 | 5 | 2.100000  | 11.202603477 | 2.720599038  | 3.452486522   | 0 | 0 | 0 | # | st  |
| 366 | 1 | 5 | 2.100000  | 13.774629217 | 2.729580341  | 7.680379551   | 0 | 0 | 0 | # | st  |
| 367 | 1 | 5 | 2.100000  | 14.697976051 | -2.638063392 | 0.744074984   | 0 | 0 | 0 | # | st  |
| 368 | 1 | 5 | 2.100000  | 12.039333961 | -2.640760033 | 2.131278354   | 0 | 0 | 0 | # | st  |
| 369 | 1 | 5 | 2.100000  | 14.611750250 | -2.631682580 | 6.359024273   | 0 | 0 | 0 | # | st  |
| 370 | 1 | 5 | 2.100000  | 11.115878839 | 2.727049911  | 0.617961151   | 0 | 0 | 0 | # | st  |
| 371 | 1 | 5 | 2.100000  | 13.704272668 | 2.723397425  | 4.839744045   | 0 | 0 | 0 | # | st  |
| 372 | 1 | 5 | 2.100000  | 12.110018745 | -2.634695815 | 4.971778212   | 0 | 0 | 0 | # | st  |
| 373 | 1 | 1 | 1.575000  | 12.890551898 | 0.057857326  | 14.792747493  | 0 | 0 | 0 | # | ao  |
| 374 | 1 | 1 | 1.575000  | 15.477691886 | 0.047832665  | 10.569647493  | 0 | 0 | 0 | # | ao  |
| 375 | 1 | 1 | 1.575000  | 10.336075843 | 0.041014554  | 16.141210963  | 0 | 0 | 0 | # | ao  |
| 376 | 1 | 1 | 1.575000  | 12.923079300 | 0.031026926  | 11.918102305  | 0 | 0 | 0 | # | ao  |
| 377 | 1 | 2 | 0.425000  | 13.441955855 | 1.425163371  | 9.911451013   | 0 | 0 | 0 | # | ho  |
| 378 | 1 | 2 | 0.425000  | 10.871522528 | 1.523504153  | 14.180912462  | 0 | 0 | 0 | # | ho  |
| 379 | 1 | 2 | 0.425000  | 14.943264323 | -1.430790090 | 12.532201022  | 0 | 0 | 0 | # | ho  |
| 380 | 1 | 2 | 0.425000  | 12.371667415 | -1.336757339 | 16.799025190  | 0 | 0 | 0 | # | ho  |
| 381 | 1 | 3 | -1.050000 | 12.299920767 | -1.017449350 | 13.358380749  | 0 | 0 | 0 | # | ob  |
| 382 | 1 | 3 | -1.050000 | 11.914883948 | -1.009534011 | 10.673429865  | 0 | 0 | 0 | # | ob  |
| 383 | 1 | 3 | -1.050000 | 14.488420410 | -1.002235530 | 14.907177115  | 0 | 0 | 0 | # | ob  |
| 384 | 1 | 3 | -1.050000 | 12.545350450 | -3.254329459 | 11.985412584  | 0 | 0 | 0 | # | ob  |
| 385 | 1 | 6 | -0.950000 | 15.129943942 | -3.253528090 | -17.594048299 | 0 | 0 | 0 | # | oht |
| 386 | 1 | 3 | -1.050000 | 10.932205783 | 1.108160884  | 9.130033991   | 0 | 0 | 0 | # | ob  |
| 387 | 1 | 3 | -1.050000 | 13.513775495 | 1.106315515  | 13.352451743  | 0 | 0 | 0 | # | ob  |
| 388 | 1 | 3 | -1.050000 | 12.681125134 | 3.339943172  | 12.176747445  | 0 | 0 | 0 | # | ob  |
| 389 | 1 | 3 | -1.050000 | 15.254542666 | 3.343459909  | 16.405069793  | 0 | 0 | 0 | # | ob  |
| 390 | 1 | 3 | -1.050000 | 10.684199510 | 3.342745271  | 10.506543562  | 0 | 0 | 0 | # | ob  |
| 391 | 1 | 3 | -1.050000 | 13.268759518 | 3.343022387  | 14.725300930  | 0 | 0 | 0 | # | ob  |
| 392 | 1 | 4 | -0.950000 | 11.299417447 | 1.030057382  | 14.905911812  | 0 | 0 | 0 | # | oh  |
| 393 | 1 | 4 | -0.950000 | 13.884670440 | 1.017364731  | 10.678860000  | 0 | 0 | 0 | # | oh  |
| 394 | 1 | 3 | -1.050000 | 12.694590946 | 3.066493209  | 8.867196118   | 0 | 0 | 0 | # | ob  |
| 395 | 1 | 3 | -1.050000 | 15.288875993 | 3.050340270  | 13.098538892  | 0 | 0 | 0 | # | ob  |
| 396 | 1 | 7 | -0.950000 | 11.928965723 | -0.928489933 | 16.031829270  | 0 | 0 | 0 | # | oho |
| 397 | 1 | 3 | -1.050000 | 10.525551485 | -2.961853389 | 13.612516698  | 0 | 0 | 0 | # | ob  |
| 398 | 1 | 4 | -0.950000 | 14.514576468 | -0.940763219 | 11.805359607  | 0 | 0 | 0 | # | oh  |
| 399 | 1 | 3 | -1.050000 | 13.119269734 | -2.977677046 | 9.393964434   | 0 | 0 | 0 | # | ob  |
| 400 | 1 | 3 | -1.050000 | 11.325537272 | 1.091158613  | 11.803442278  | 0 | 0 | 0 | # | ob  |
| 401 | 1 | 3 | -1.050000 | 13.899085134 | 1.098365238  | 16.037475661  | 0 | 0 | 0 | # | ob  |
| 402 | 1 | 3 | -1.050000 | 14.881437623 | -1.019123292 | 9.131339972   | 0 | 0 | 0 | # | ob  |
| 403 | 1 | 3 | -1.050000 | 10.559334585 | -3.254366293 | 10.305776368  | 0 | 0 | 0 | # | ob  |
| 404 | 1 | 3 | -1.050000 | 13.133287271 | -3.251063569 | 14.533957725  | 0 | 0 | 0 | # | ob  |
| 405 | 1 | 5 | 2.100000  | 11.202603477 | 2.720599038  | 11.902086522  | 0 | 0 | 0 | # | st  |
| 406 | 1 | 5 | 2.100000  | 13.774629217 | 2.729580341  | 16.129979551  | 0 | 0 | 0 | # | st  |
| 407 | 1 | 5 | 2.100000  | 14.697976051 | -2.638063392 | 9.193674984   | 0 | 0 | 0 | # | st  |
| 408 | 1 | 5 | 2.100000  | 12.039333961 | -2.640760033 | 10.580878354  | 0 | 0 | 0 | # | st  |
| 409 | 1 | 5 | 2.100000  | 14.611750250 | -2.631682580 | 14.808624273  | 0 | 0 | 0 | # | st  |
| 410 | 1 | 5 | 2.100000  | 11.115878839 | 2.727049911  | 9.067561151   | 0 | 0 | 0 | # | st  |
| 411 | 1 | 5 | 2.100000  | 13.704272668 | 2.723397425  | 13.289344045  | 0 | 0 | 0 | # | st  |
| 412 | 1 | 5 | 2.100000  | 12.110018745 | -2.634695815 | 13.421378212  | 0 | 0 | 0 | # | st  |
| 413 | 1 | 1 | 1.575000  | 12.890551898 | 0.057857326  | -10.556052507 | 0 | 0 | 0 | # | ao  |
| 414 | 1 | 1 | 1.575000  | 15.477691886 | 0.047832665  | -14.779152507 | 0 | 0 | 0 | # | ao  |
| 415 | 1 | 1 | 1.575000  | 10.336075843 | 0.041014554  | -9.207589037  | 0 | 0 | 0 | # | ao  |
| 416 | 1 | 1 | 1.575000  | 12.923079300 | 0.031026926  | -13.430697695 | 0 | 0 | 0 | # | ao  |
| 417 | 1 | 2 | 0.425000  | 13.441955855 | 1.425163371  | -15.437348987 | 0 | 0 | 0 | # | ho  |



|     |   |   |           |               |              |               |   |   |   |     |
|-----|---|---|-----------|---------------|--------------|---------------|---|---|---|-----|
| 418 | 1 | 2 | 0.425000  | 10.871522528  | 1.523504153  | -11.167887538 | 0 | 0 | 0 | ho  |
| 419 | 1 | 2 | 0.425000  | 14.943264323  | -1.430790090 | -12.816598978 | 0 | 0 | 0 | ho  |
| 420 | 1 | 2 | 0.425000  | 12.371667415  | -1.336757339 | -8.549774810  | 0 | 0 | 0 | ho  |
| 421 | 1 | 3 | -1.050000 | 12.299920767  | -1.017449350 | -11.990419251 | 0 | 0 | 0 | ob  |
| 422 | 1 | 3 | -1.050000 | 11.914883948  | -1.009534011 | -14.675370135 | 0 | 0 | 0 | ob  |
| 423 | 1 | 3 | -1.050000 | 14.488420410  | -1.002235530 | -10.441622885 | 0 | 0 | 0 | ob  |
| 424 | 1 | 3 | -1.050000 | 12.545350450  | -3.254329459 | -13.363387416 | 0 | 0 | 0 | ob  |
| 425 | 1 | 3 | -1.050000 | 15.129943942  | -3.253528090 | -9.144488299  | 0 | 0 | 0 | ob  |
| 426 | 1 | 3 | -1.050000 | 10.932205783  | 1.108160884  | 17.579633991  | 0 | 0 | 0 | ob  |
| 427 | 1 | 3 | -1.050000 | 13.513775495  | 1.106315515  | -11.996348257 | 0 | 0 | 0 | ob  |
| 428 | 1 | 3 | -1.050000 | 12.681125134  | 3.339943172  | -13.172052555 | 0 | 0 | 0 | ob  |
| 429 | 1 | 3 | -1.050000 | 15.254542666  | 3.343459909  | -8.943730207  | 0 | 0 | 0 | ob  |
| 430 | 1 | 6 | -0.950000 | 10.684199510  | 3.342745271  | 18.956143562  | 0 | 0 | 0 | oht |
| 431 | 1 | 3 | -1.050000 | 13.268759518  | 3.343022387  | -10.623499070 | 0 | 0 | 0 | ob  |
| 432 | 1 | 4 | -0.950000 | 11.299417447  | 1.030057382  | -10.442888188 | 0 | 0 | 0 | oh  |
| 433 | 1 | 7 | -0.950000 | 13.884670440  | 1.017364731  | -14.669940000 | 0 | 0 | 0 | oho |
| 434 | 1 | 3 | -1.050000 | 12.694590946  | 3.066493209  | 17.316796118  | 0 | 0 | 0 | ob  |
| 435 | 1 | 3 | -1.050000 | 15.288875993  | 3.050340270  | -12.250261108 | 0 | 0 | 0 | ob  |
| 436 | 1 | 4 | -0.950000 | 11.928965723  | -0.928489933 | -9.316970730  | 0 | 0 | 0 | oh  |
| 437 | 1 | 3 | -1.050000 | 10.525551485  | -2.961853389 | -11.736283302 | 0 | 0 | 0 | ob  |
| 438 | 1 | 4 | -0.950000 | 14.514576468  | -0.940763219 | -13.543440393 | 0 | 0 | 0 | oh  |
| 439 | 1 | 3 | -1.050000 | 13.119269734  | -2.977677046 | -15.954835566 | 0 | 0 | 0 | ob  |
| 440 | 1 | 3 | -1.050000 | 11.325537272  | 1.091158613  | -13.545357722 | 0 | 0 | 0 | ob  |
| 441 | 1 | 3 | -1.050000 | 13.899085134  | 1.098365238  | -9.311324339  | 0 | 0 | 0 | ob  |
| 442 | 1 | 3 | -1.050000 | 14.881437623  | -1.019123292 | -16.217460028 | 0 | 0 | 0 | ob  |
| 443 | 1 | 3 | -1.050000 | 10.559334585  | -3.254366293 | -15.043023632 | 0 | 0 | 0 | ob  |
| 444 | 1 | 3 | -1.050000 | 13.133287271  | -3.251063569 | -10.814842275 | 0 | 0 | 0 | ob  |
| 445 | 1 | 5 | 2.100000  | 11.202603477  | 2.720599038  | -13.446713478 | 0 | 0 | 0 | st  |
| 446 | 1 | 5 | 2.100000  | 13.774629217  | 2.729580341  | -9.218820449  | 0 | 0 | 0 | st  |
| 447 | 1 | 5 | 2.100000  | 14.697976051  | -2.638063392 | -16.155125016 | 0 | 0 | 0 | st  |
| 448 | 1 | 5 | 2.100000  | 12.039333961  | -2.640760033 | -14.767921646 | 0 | 0 | 0 | st  |
| 449 | 1 | 5 | 2.100000  | 14.611750250  | -2.631682580 | -10.540175727 | 0 | 0 | 0 | st  |
| 450 | 1 | 5 | 2.100000  | 11.115878839  | 2.727049911  | 17.517161151  | 0 | 0 | 0 | st  |
| 451 | 1 | 5 | 2.100000  | 13.704272668  | 2.723397425  | -12.059455955 | 0 | 0 | 0 | st  |
| 452 | 1 | 5 | 2.100000  | 12.110018745  | -2.634695815 | -11.927421788 | 0 | 0 | 0 | st  |
| 453 | 1 | 1 | 1.575000  | 12.890551898  | 0.057857326  | -2.106452507  | 0 | 0 | 0 | ao  |
| 454 | 1 | 1 | 1.575000  | 15.477691886  | 0.047832665  | -6.329552507  | 0 | 0 | 0 | ao  |
| 455 | 1 | 1 | 1.575000  | 10.336075843  | 0.041014554  | -0.757989037  | 0 | 0 | 0 | ao  |
| 456 | 1 | 1 | 1.575000  | 12.923079300  | 0.031026926  | -4.981097695  | 0 | 0 | 0 | ao  |
| 457 | 1 | 2 | 0.425000  | 13.441955855  | 1.425163371  | -6.987748987  | 0 | 0 | 0 | ho  |
| 458 | 1 | 2 | 0.425000  | 10.871522528  | 1.523504153  | -2.718287538  | 0 | 0 | 0 | ho  |
| 459 | 1 | 2 | 0.425000  | 14.943264323  | -1.430790090 | -4.366998978  | 0 | 0 | 0 | ho  |
| 460 | 1 | 2 | 0.425000  | 12.371667415  | -1.336757339 | -0.100174810  | 0 | 0 | 0 | ho  |
| 461 | 1 | 3 | -1.050000 | 12.299920767  | -1.017449350 | -3.540819251  | 0 | 0 | 0 | ob  |
| 462 | 1 | 3 | -1.050000 | 11.914883948  | -1.009534011 | -6.225770135  | 0 | 0 | 0 | ob  |
| 463 | 1 | 3 | -1.050000 | 14.488420410  | -1.002235530 | -1.992022885  | 0 | 0 | 0 | ob  |
| 464 | 1 | 3 | -1.050000 | 12.545350450  | -3.254329459 | -4.913787416  | 0 | 0 | 0 | ob  |
| 465 | 1 | 3 | -1.050000 | 15.129943942  | -3.253528090 | -0.694848299  | 0 | 0 | 0 | ob  |
| 466 | 1 | 3 | -1.050000 | 10.932205783  | 1.108160884  | -7.769166009  | 0 | 0 | 0 | ob  |
| 467 | 1 | 3 | -1.050000 | 13.513775495  | 1.106315515  | -3.546748257  | 0 | 0 | 0 | ob  |
| 468 | 1 | 3 | -1.050000 | 12.681125134  | 3.339943172  | -4.722452555  | 0 | 0 | 0 | ob  |
| 469 | 1 | 3 | -1.050000 | 15.254542666  | 3.343459909  | -0.494130207  | 0 | 0 | 0 | ob  |
| 470 | 1 | 3 | -1.050000 | 10.684199510  | 3.342745271  | -6.392656438  | 0 | 0 | 0 | ob  |
| 471 | 1 | 3 | -1.050000 | 13.268759518  | 3.343022387  | -2.173899070  | 0 | 0 | 0 | ob  |
| 472 | 1 | 4 | -0.950000 | 11.299417447  | 1.030057382  | -1.993288188  | 0 | 0 | 0 | oh  |
| 473 | 1 | 4 | -0.950000 | 13.884670440  | 1.017364731  | -6.220340000  | 0 | 0 | 0 | oh  |
| 474 | 1 | 3 | -1.050000 | 12.694590946  | 3.066493209  | -8.032003882  | 0 | 0 | 0 | ob  |
| 475 | 1 | 3 | -1.050000 | 15.288875993  | 3.050340270  | -3.800661108  | 0 | 0 | 0 | ob  |
| 476 | 1 | 4 | -0.950000 | 11.928965723  | -0.928489933 | -0.867370730  | 0 | 0 | 0 | oh  |
| 477 | 1 | 3 | -1.050000 | 10.525551485  | -2.961853389 | -3.286683302  | 0 | 0 | 0 | ob  |
| 478 | 1 | 4 | -0.950000 | 14.514576468  | -0.940763219 | -5.093840393  | 0 | 0 | 0 | oh  |
| 479 | 1 | 3 | -1.050000 | 13.119269734  | -2.977677046 | -7.505235566  | 0 | 0 | 0 | ob  |
| 480 | 1 | 3 | -1.050000 | 11.325537272  | 1.091158613  | -5.095757722  | 0 | 0 | 0 | ob  |
| 481 | 1 | 3 | -1.050000 | 13.899085134  | 1.098365238  | -0.861724339  | 0 | 0 | 0 | ob  |
| 482 | 1 | 3 | -1.050000 | 14.881437623  | -1.019123292 | -7.767860028  | 0 | 0 | 0 | ob  |
| 483 | 1 | 3 | -1.050000 | 10.559334585  | -3.254366293 | -6.593423632  | 0 | 0 | 0 | ob  |
| 484 | 1 | 3 | -1.050000 | 13.133287271  | -3.251063569 | -2.365242275  | 0 | 0 | 0 | ob  |
| 485 | 1 | 5 | 2.100000  | 11.202603477  | 2.720599038  | -4.997113478  | 0 | 0 | 0 | st  |
| 486 | 1 | 5 | 2.100000  | 13.774629217  | 2.729580341  | -0.769220449  | 0 | 0 | 0 | st  |
| 487 | 1 | 5 | 2.100000  | 14.697976051  | -2.638063392 | -7.705525016  | 0 | 0 | 0 | st  |
| 488 | 1 | 5 | 2.100000  | 12.039333961  | -2.640760033 | -6.318321646  | 0 | 0 | 0 | st  |
| 489 | 1 | 5 | 2.100000  | 14.611750250  | -2.631682580 | -2.090575727  | 0 | 0 | 0 | st  |
| 490 | 1 | 5 | 2.100000  | 11.115878839  | 2.727049911  | -7.831638849  | 0 | 0 | 0 | st  |
| 491 | 1 | 5 | 2.100000  | 13.704272668  | 2.723397425  | -3.609855955  | 0 | 0 | 0 | st  |
| 492 | 1 | 5 | 2.100000  | 12.110018745  | -2.634695815 | -3.477821788  | 0 | 0 | 0 | st  |
| 493 | 1 | 6 | -0.950000 | 15.171651183  | -2.634071151 | 16.634714390  | 0 | 0 | 0 | oht |
| 494 | 1 | 6 | -0.950000 | 10.915806465  | 2.961484659  | -15.319631379 | 0 | 0 | 0 | oht |
| 495 | 1 | 2 | 0.425000  | 10.755563167  | 3.078655077  | -16.411736324 | 0 | 0 | 0 | ho  |
| 496 | 1 | 2 | 0.425000  | 15.336389943  | -2.983958974 | -18.650841835 | 0 | 0 | 0 | ho  |
| 497 | 1 | 2 | 0.425000  | 10.761038959  | 3.250098365  | 20.059598264  | 0 | 0 | 0 | ho  |
| 498 | 1 | 2 | 0.425000  | 14.783433436  | -2.533686233 | 17.669755394  | 0 | 0 | 0 | ho  |
| 499 | 1 | 1 | 1.575000  | -12.923448102 | 0.057857326  | 6.343147493   | 1 | 0 | 0 | ao  |
| 500 | 1 | 1 | 1.575000  | -10.336308114 | 0.047832665  | 2.120047493   | 1 | 0 | 0 | ao  |
| 501 | 1 | 1 | 1.575000  | -15.477924157 | 0.041014554  | 7.691610963   | 1 | 0 | 0 | ao  |
| 502 | 1 | 1 | 1.575000  | -12.890920700 | 0.031026926  | 3.468502305   | 1 | 0 | 0 | ao  |
| 503 | 1 | 2 | 0.425000  | -12.372044145 | 1.425163371  | 1.461851013   | 1 | 0 | 0 | ho  |
| 504 | 1 | 2 | 0.425000  | -14.942474772 | 1.523504153  | 5.731312462   | 1 | 0 | 0 | ho  |
| 505 | 1 | 2 | 0.425000  | -10.870735677 | -1.430790090 | 4.082601022   | 1 | 0 | 0 | ho  |
| 506 | 1 | 2 | 0.425000  | -13.442332585 | -1.336757339 | 8.349425190   | 1 | 0 | 0 | ho  |
| 507 | 1 | 3 | -1.050000 | -13.514079233 | -1.017449350 | 4.908780749   | 1 | 0 | 0 | ob  |
| 508 | 1 | 3 | -1.050000 | -13.899116052 | -1.009534011 | 2.223829865   | 1 | 0 | 0 | ob  |
| 509 | 1 | 3 | -1.050000 | -11.325579590 | -1.002235530 | 6.457577115   | 1 | 0 | 0 | ob  |
| 510 | 1 | 3 | -1.050000 | -13.268649550 | -3.254329459 | 3.535812584   | 1 | 0 | 0 | ob  |

|     |   |   |           |               |              |               |   |   |   |   |     |
|-----|---|---|-----------|---------------|--------------|---------------|---|---|---|---|-----|
| 511 | 1 | 3 | -1.050000 | -10.684056058 | -3.253528090 | 7.754751701   | 1 | 0 | 0 | # | ob  |
| 512 | 1 | 3 | -1.050000 | -14.881794217 | 1.108160884  | 0.680433991   | 1 | 0 | 0 | # | ob  |
| 513 | 1 | 3 | -1.050000 | -12.300224505 | 1.106315515  | 4.902851743   | 1 | 0 | 0 | # | ob  |
| 514 | 1 | 3 | -1.050000 | -13.132874866 | 3.339943172  | 3.727147445   | 1 | 0 | 0 | # | ob  |
| 515 | 1 | 3 | -1.050000 | -10.559457334 | 3.343459909  | 7.955469793   | 1 | 0 | 0 | # | ob  |
| 516 | 1 | 3 | -1.050000 | -15.129800490 | 3.342745271  | 2.056943562   | 1 | 0 | 0 | # | ob  |
| 517 | 1 | 3 | -1.050000 | -12.545240482 | 3.343022387  | 6.275700930   | 1 | 0 | 0 | # | ob  |
| 518 | 1 | 4 | -0.950000 | -14.514582553 | 1.030057382  | 6.456311812   | 1 | 0 | 0 | # | oh  |
| 519 | 1 | 4 | -0.950000 | -11.929329560 | 1.017364731  | 2.292600000   | 1 | 0 | 0 | # | oh  |
| 520 | 1 | 3 | -1.050000 | -13.119409054 | 3.066493209  | 0.417596118   | 1 | 0 | 0 | # | ob  |
| 521 | 1 | 3 | -1.050000 | -10.525124007 | 3.050340270  | 4.648938892   | 1 | 0 | 0 | # | ob  |
| 522 | 1 | 4 | -0.950000 | -13.885034277 | -0.928489933 | 7.582229270   | 1 | 0 | 0 | # | oh  |
| 523 | 1 | 3 | -1.050000 | -15.288448515 | -2.961853389 | 5.162916698   | 1 | 0 | 0 | # | ob  |
| 524 | 1 | 4 | -0.950000 | -11.299423532 | -0.940763219 | 3.355759607   | 1 | 0 | 0 | # | oh  |
| 525 | 1 | 3 | -1.050000 | -12.694730266 | -2.977677046 | 0.944364434   | 1 | 0 | 0 | # | ob  |
| 526 | 1 | 3 | -1.050000 | -14.488462728 | 1.091158613  | 3.353842278   | 1 | 0 | 0 | # | ob  |
| 527 | 1 | 3 | -1.050000 | -11.914914866 | 1.098365238  | 7.587875661   | 1 | 0 | 0 | # | ob  |
| 528 | 1 | 3 | -1.050000 | -10.932562377 | -1.019123292 | 0.681739972   | 1 | 0 | 0 | # | ob  |
| 529 | 1 | 3 | -1.050000 | -15.254665415 | -3.254366293 | 1.856176368   | 1 | 0 | 0 | # | ob  |
| 530 | 1 | 3 | -1.050000 | -12.680712729 | -3.251063569 | 6.084357725   | 1 | 0 | 0 | # | ob  |
| 531 | 1 | 5 | 2.100000  | -14.611396523 | 2.720599038  | 3.452486522   | 1 | 0 | 0 | # | st  |
| 532 | 1 | 5 | 2.100000  | -12.039370783 | 2.729580341  | 7.680379551   | 1 | 0 | 0 | # | st  |
| 533 | 1 | 5 | 2.100000  | -11.116023949 | -2.638063392 | 0.744074984   | 1 | 0 | 0 | # | st  |
| 534 | 1 | 5 | 2.100000  | -13.774666039 | -2.640760033 | 2.131278354   | 1 | 0 | 0 | # | st  |
| 535 | 1 | 5 | 2.100000  | -11.202249750 | -2.631682580 | 6.359024273   | 1 | 0 | 0 | # | st  |
| 536 | 1 | 5 | 2.100000  | -14.698121161 | 2.727049911  | 0.617961151   | 1 | 0 | 0 | # | st  |
| 537 | 1 | 5 | 2.100000  | -12.109727332 | 2.723397425  | 4.839744045   | 1 | 0 | 0 | # | st  |
| 538 | 1 | 5 | 2.100000  | -13.703981255 | -2.634695815 | 4.971778212   | 1 | 0 | 0 | # | st  |
| 539 | 1 | 1 | 1.575000  | -12.923448102 | 0.057857326  | 14.792747493  | 1 | 0 | 0 | # | ao  |
| 540 | 1 | 1 | 1.575000  | -10.336308114 | 0.047832665  | 10.569647493  | 1 | 0 | 0 | # | ao  |
| 541 | 1 | 1 | 1.575000  | -15.477924157 | 0.041014554  | 16.141210963  | 1 | 0 | 0 | # | ao  |
| 542 | 1 | 1 | 1.575000  | -12.890207000 | 0.031026926  | 11.918102305  | 1 | 0 | 0 | # | ao  |
| 543 | 1 | 2 | 0.425000  | -12.372044145 | 1.425163371  | 9.911451013   | 1 | 0 | 0 | # | ho  |
| 544 | 1 | 2 | 0.425000  | -14.942477472 | 1.523504153  | 14.180912462  | 1 | 0 | 0 | # | ho  |
| 545 | 1 | 2 | 0.425000  | -10.870735677 | -1.430790090 | 12.532201022  | 1 | 0 | 0 | # | ho  |
| 546 | 1 | 2 | 0.425000  | -13.442332585 | -1.336757339 | 16.799025190  | 1 | 0 | 0 | # | ho  |
| 547 | 1 | 3 | -1.050000 | -13.514079233 | -1.017449350 | 13.358380749  | 1 | 0 | 0 | # | ob  |
| 548 | 1 | 3 | -1.050000 | -13.899116052 | -1.009534011 | 10.673429865  | 1 | 0 | 0 | # | ob  |
| 549 | 1 | 3 | -1.050000 | -11.325579590 | -1.002235530 | 14.907177115  | 1 | 0 | 0 | # | ob  |
| 550 | 1 | 3 | -1.050000 | -13.268649550 | -3.254329459 | 11.985412584  | 1 | 0 | 0 | # | ob  |
| 551 | 1 | 6 | -0.950000 | -10.684056058 | -3.253528090 | -17.594048299 | 1 | 0 | 0 | # | oht |
| 552 | 1 | 3 | -1.050000 | -14.881794217 | 1.108160884  | 9.130033991   | 1 | 0 | 0 | # | ob  |
| 553 | 1 | 3 | -1.050000 | -12.300224505 | 1.106315515  | 13.352451743  | 1 | 0 | 0 | # | ob  |
| 554 | 1 | 3 | -1.050000 | -13.132874866 | 3.339943172  | 12.176747445  | 1 | 0 | 0 | # | ob  |
| 555 | 1 | 3 | -1.050000 | -10.559457334 | 3.343459909  | 16.405069793  | 1 | 0 | 0 | # | ob  |
| 556 | 1 | 3 | -1.050000 | -15.129800490 | 3.342745271  | 10.506543562  | 1 | 0 | 0 | # | ob  |
| 557 | 1 | 3 | -1.050000 | -12.545240482 | 3.343022387  | 14.725300930  | 1 | 0 | 0 | # | ob  |
| 558 | 1 | 4 | -0.950000 | -14.514582553 | 1.030057382  | 14.905911812  | 1 | 0 | 0 | # | oh  |
| 559 | 1 | 4 | -0.950000 | -11.929329560 | 1.017364731  | 10.678860000  | 1 | 0 | 0 | # | oh  |
| 560 | 1 | 3 | -1.050000 | -13.119409054 | 3.066493209  | 8.867196118   | 1 | 0 | 0 | # | ob  |
| 561 | 1 | 3 | -1.050000 | -10.525124007 | 3.050340270  | 13.098538892  | 1 | 0 | 0 | # | ob  |
| 562 | 1 | 7 | -0.950000 | -13.885034277 | -0.928489933 | 16.031829270  | 1 | 0 | 0 | # | oho |
| 563 | 1 | 3 | -1.050000 | -15.288448515 | -2.961853389 | 13.612516698  | 1 | 0 | 0 | # | ob  |
| 564 | 1 | 4 | -0.950000 | -11.299423532 | -0.940763219 | 11.805359607  | 1 | 0 | 0 | # | oh  |
| 565 | 1 | 3 | -1.050000 | -12.694730266 | -2.977677046 | 9.393964434   | 1 | 0 | 0 | # | ob  |
| 566 | 1 | 3 | -1.050000 | -14.488462728 | 1.091158613  | 11.803442278  | 1 | 0 | 0 | # | ob  |
| 567 | 1 | 3 | -1.050000 | -11.914914866 | 1.098365238  | 16.037475661  | 1 | 0 | 0 | # | ob  |
| 568 | 1 | 3 | -1.050000 | -10.932562377 | -1.019123292 | 9.131339972   | 1 | 0 | 0 | # | ob  |
| 569 | 1 | 3 | -1.050000 | -15.254665415 | -3.254366293 | 10.305776368  | 1 | 0 | 0 | # | ob  |
| 570 | 1 | 3 | -1.050000 | -12.680712729 | -3.251063569 | 14.533957725  | 1 | 0 | 0 | # | ob  |
| 571 | 1 | 5 | 2.100000  | -14.611396523 | 2.720599038  | 11.902086522  | 1 | 0 | 0 | # | st  |
| 572 | 1 | 5 | 2.100000  | -12.039370783 | 2.729580341  | 16.129979551  | 1 | 0 | 0 | # | st  |
| 573 | 1 | 5 | 2.100000  | -11.116023949 | -2.638063392 | 9.193674984   | 1 | 0 | 0 | # | st  |
| 574 | 1 | 5 | 2.100000  | -13.774666039 | -2.640760033 | 10.580878354  | 1 | 0 | 0 | # | st  |
| 575 | 1 | 5 | 2.100000  | -11.202249750 | -2.631682580 | 14.808624273  | 1 | 0 | 0 | # | st  |
| 576 | 1 | 5 | 2.100000  | -14.698121161 | 2.727049911  | 9.067561151   | 1 | 0 | 0 | # | st  |
| 577 | 1 | 5 | 2.100000  | -12.109727332 | 2.723397425  | 13.289344045  | 1 | 0 | 0 | # | st  |
| 578 | 1 | 5 | 2.100000  | -13.703981255 | -2.634695815 | 13.421378212  | 1 | 0 | 0 | # | st  |
| 579 | 1 | 1 | 1.575000  | -12.923448102 | 0.057857326  | -10.556052507 | 1 | 0 | 0 | # | ao  |
| 580 | 1 | 1 | 1.575000  | -10.336308114 | 0.047832665  | -14.779152507 | 1 | 0 | 0 | # | ao  |
| 581 | 1 | 1 | 1.575000  | -15.477924157 | 0.041014554  | -9.207589037  | 1 | 0 | 0 | # | ao  |
| 582 | 1 | 1 | 1.575000  | -12.890207000 | 0.031026926  | -13.430697695 | 1 | 0 | 0 | # | ao  |
| 583 | 1 | 2 | 0.425000  | -12.372044145 | 1.425163371  | -15.437348987 | 1 | 0 | 0 | # | ho  |
| 584 | 1 | 2 | 0.425000  | -14.942477472 | 1.523504153  | -11.167887538 | 1 | 0 | 0 | # | ho  |
| 585 | 1 | 2 | 0.425000  | -10.870735677 | -1.430790090 | -12.816598978 | 1 | 0 | 0 | # | ho  |
| 586 | 1 | 2 | 0.425000  | -13.442332585 | -1.336757339 | -8.549774810  | 1 | 0 | 0 | # | ho  |
| 587 | 1 | 3 | -1.050000 | -13.514079233 | -1.017449350 | -11.990419251 | 1 | 0 | 0 | # | ob  |
| 588 | 1 | 3 | -1.050000 | -13.899116052 | -1.009534011 | -14.675370135 | 1 | 0 | 0 | # | ob  |
| 589 | 1 | 3 | -1.050000 | -11.325579590 | -1.002235530 | -10.441622885 | 1 | 0 | 0 | # | ob  |
| 590 | 1 | 3 | -1.050000 | -13.268649550 | -3.254329459 | -13.363387416 | 1 | 0 | 0 | # | ob  |
| 591 | 1 | 3 | -1.050000 | -10.684056058 | -3.253528090 | -9.144448299  | 1 | 0 | 0 | # | ob  |
| 592 | 1 | 3 | -1.050000 | -14.881794217 | 1.108160884  | 17.579633991  | 1 | 0 | 0 | # | ob  |
| 593 | 1 | 3 | -1.050000 | -12.300224505 | 1.106315515  | -11.996348257 | 1 | 0 | 0 | # | ob  |
| 594 | 1 | 3 | -1.050000 | -13.132874866 | 3.339943172  | -13.172052555 | 1 | 0 | 0 | # | ob  |
| 595 | 1 | 3 | -1.050000 | -10.559457334 | 3.343459909  | -8.943730207  | 1 | 0 | 0 | # | ob  |
| 596 | 1 | 6 | -0.950000 | -15.129800490 | 3.342745271  | 18.956143562  | 1 | 0 | 0 | # | oht |
| 597 | 1 | 3 | -1.050000 | -12.545240482 | 3.343022387  | -10.623499070 | 1 | 0 | 0 | # | ob  |
| 598 | 1 | 4 | -0.950000 | -14.514582553 | 1.030057382  | -10.442888188 | 1 | 0 | 0 | # | oh  |
| 599 | 1 | 7 | -0.950000 | -11.929329560 | 1.017364731  | -14.669940000 | 1 | 0 | 0 | # | oho |
| 600 | 1 | 3 | -1.050000 | -13.119409054 | 3.066493209  | 17.316796118  | 1 | 0 | 0 | # | ob  |
| 601 | 1 | 3 | -1.050000 | -10.525124007 | 3.050340270  | -12.250261108 | 1 | 0 | 0 | # | ob  |
| 602 | 1 | 4 | -0.950000 | -13.885034277 | -0.928489933 | -9.316970730  | 1 | 0 | 0 | # | oh  |
| 603 | 1 | 3 | -1.050000 | -15.288448515 | -2.961853389 | -11.736283302 | 1 | 0 | 0 | # | ob  |

|     |   |   |           |               |              |               |   |   |   |     |
|-----|---|---|-----------|---------------|--------------|---------------|---|---|---|-----|
| 604 | 1 | 4 | -0.950000 | -11.299423532 | -0.940763219 | -13.543440393 | 1 | 0 | 0 | oh  |
| 605 | 1 | 3 | -1.050000 | -12.694730266 | -2.977677046 | -15.954835566 | 1 | 0 | 0 | ob  |
| 606 | 1 | 3 | -1.050000 | -14.488462728 | 1.091158613  | -13.545357722 | 1 | 0 | 0 | ob  |
| 607 | 1 | 3 | -1.050000 | -11.914914866 | 1.098365238  | -9.311324339  | 1 | 0 | 0 | ob  |
| 608 | 1 | 3 | -1.050000 | -10.932562377 | -1.019123292 | -16.217460028 | 1 | 0 | 0 | ob  |
| 609 | 1 | 3 | -1.050000 | -15.254665415 | -3.254366293 | -15.043023632 | 1 | 0 | 0 | ob  |
| 610 | 1 | 3 | -1.050000 | -12.680712729 | -3.251063569 | -10.814842275 | 1 | 0 | 0 | ob  |
| 611 | 1 | 5 | 2.100000  | -14.611396523 | 2.720599038  | -13.446713478 | 1 | 0 | 0 | st  |
| 612 | 1 | 5 | 2.100000  | -12.039370783 | 2.729580341  | -9.218820449  | 1 | 0 | 0 | st  |
| 613 | 1 | 5 | 2.100000  | -11.116023949 | -2.638063392 | -16.155125016 | 1 | 0 | 0 | st  |
| 614 | 1 | 5 | 2.100000  | -13.774666039 | -2.640760033 | -14.767921646 | 1 | 0 | 0 | st  |
| 615 | 1 | 5 | 2.100000  | -11.202249750 | -2.631682580 | -10.540175727 | 1 | 0 | 0 | st  |
| 616 | 1 | 5 | 2.100000  | -14.698121161 | 2.727049911  | 17.517161151  | 1 | 0 | 0 | st  |
| 617 | 1 | 5 | 2.100000  | -12.109727332 | 2.723397425  | -12.059455955 | 1 | 0 | 0 | st  |
| 618 | 1 | 5 | 2.100000  | -13.703981255 | -2.634695815 | -11.927421788 | 1 | 0 | 0 | st  |
| 619 | 1 | 1 | 1.575000  | -12.923448102 | 0.057857326  | -2.106452507  | 1 | 0 | 0 | ao  |
| 620 | 1 | 1 | 1.575000  | -10.336308114 | 0.047832665  | -6.329552507  | 1 | 0 | 0 | ao  |
| 621 | 1 | 1 | 1.575000  | -15.477924157 | 0.041014554  | -0.757989037  | 1 | 0 | 0 | ao  |
| 622 | 1 | 1 | 1.575000  | -12.890920700 | 0.031026926  | -4.981097695  | 1 | 0 | 0 | ao  |
| 623 | 1 | 2 | 0.425000  | -12.372044145 | 1.425163371  | -6.987748987  | 1 | 0 | 0 | ho  |
| 624 | 1 | 2 | 0.425000  | -14.942477472 | 1.523504153  | -2.718287538  | 1 | 0 | 0 | ho  |
| 625 | 1 | 2 | 0.425000  | -10.870735677 | -1.430790090 | -4.366998978  | 1 | 0 | 0 | ho  |
| 626 | 1 | 2 | 0.425000  | -13.442332585 | -1.336757339 | -0.100174810  | 1 | 0 | 0 | ho  |
| 627 | 1 | 3 | -1.050000 | -13.514079233 | -1.017449350 | -3.540819251  | 1 | 0 | 0 | ob  |
| 628 | 1 | 3 | -1.050000 | -13.899116052 | -1.009534011 | -6.225770135  | 1 | 0 | 0 | ob  |
| 629 | 1 | 3 | -1.050000 | -11.325579590 | -1.002235530 | -1.992022885  | 1 | 0 | 0 | ob  |
| 630 | 1 | 3 | -1.050000 | -13.268649550 | -3.254329459 | -4.913787416  | 1 | 0 | 0 | ob  |
| 631 | 1 | 3 | -1.050000 | -10.684056058 | -3.253528090 | -0.694848299  | 1 | 0 | 0 | ob  |
| 632 | 1 | 3 | -1.050000 | -14.881794217 | 1.108160884  | -7.769166009  | 1 | 0 | 0 | ob  |
| 633 | 1 | 3 | -1.050000 | -12.300224505 | 1.106315515  | -3.546748257  | 1 | 0 | 0 | ob  |
| 634 | 1 | 3 | -1.050000 | -13.132874866 | 3.339943172  | -4.722452555  | 1 | 0 | 0 | ob  |
| 635 | 1 | 3 | -1.050000 | -10.559457334 | 3.343459909  | -0.494130207  | 1 | 0 | 0 | ob  |
| 636 | 1 | 3 | -1.050000 | -15.129800490 | 3.342745271  | -6.392656438  | 1 | 0 | 0 | ob  |
| 637 | 1 | 3 | -1.050000 | -12.545240482 | 3.343022387  | -2.173899070  | 1 | 0 | 0 | ob  |
| 638 | 1 | 4 | -0.950000 | -14.514582553 | 1.030057382  | -1.993288188  | 1 | 0 | 0 | oh  |
| 639 | 1 | 4 | -0.950000 | -11.929329560 | 1.017364731  | -6.220340000  | 1 | 0 | 0 | oh  |
| 640 | 1 | 3 | -1.050000 | -13.119409054 | 3.066493209  | -8.032003882  | 1 | 0 | 0 | ob  |
| 641 | 1 | 3 | -1.050000 | -10.525124007 | 3.050340270  | -3.800661108  | 1 | 0 | 0 | ob  |
| 642 | 1 | 4 | -0.950000 | -13.885034277 | -0.928488933 | -0.867370730  | 1 | 0 | 0 | oh  |
| 643 | 1 | 3 | -1.050000 | -15.288448515 | -2.961853389 | -3.286683302  | 1 | 0 | 0 | ob  |
| 644 | 1 | 4 | -0.950000 | -11.299423532 | -0.940763219 | -5.093840393  | 1 | 0 | 0 | oh  |
| 645 | 1 | 3 | -1.050000 | -12.694730266 | -2.977677046 | -7.505235566  | 1 | 0 | 0 | ob  |
| 646 | 1 | 3 | -1.050000 | -14.488462728 | 1.091158613  | -5.095757722  | 1 | 0 | 0 | ob  |
| 647 | 1 | 3 | -1.050000 | -11.914914866 | 1.098365238  | -0.861724339  | 1 | 0 | 0 | ob  |
| 648 | 1 | 3 | -1.050000 | -10.932562377 | -1.019123292 | -7.767860028  | 1 | 0 | 0 | ob  |
| 649 | 1 | 3 | -1.050000 | -15.254665415 | -3.254366293 | -6.593423632  | 1 | 0 | 0 | ob  |
| 650 | 1 | 3 | -1.050000 | -12.680712729 | -3.251063569 | -2.365242275  | 1 | 0 | 0 | ob  |
| 651 | 1 | 5 | 2.100000  | -14.611396523 | 2.720599038  | -4.997113478  | 1 | 0 | 0 | st  |
| 652 | 1 | 5 | 2.100000  | -12.039370783 | 2.729580341  | -0.769220449  | 1 | 0 | 0 | st  |
| 653 | 1 | 5 | 2.100000  | -11.116023949 | -2.638063392 | -7.705525016  | 1 | 0 | 0 | st  |
| 654 | 1 | 5 | 2.100000  | -13.774666039 | -2.640760033 | -6.318321646  | 1 | 0 | 0 | st  |
| 655 | 1 | 5 | 2.100000  | -11.202249750 | -2.631682580 | -2.090575727  | 1 | 0 | 0 | st  |
| 656 | 1 | 5 | 2.100000  | -14.698121161 | 2.727049911  | -7.831638849  | 1 | 0 | 0 | st  |
| 657 | 1 | 5 | 2.100000  | -12.109727332 | 2.723397425  | -3.609855955  | 1 | 0 | 0 | st  |
| 658 | 1 | 5 | 2.100000  | -13.703981255 | -2.634695815 | -3.477821788  | 1 | 0 | 0 | st  |
| 659 | 1 | 6 | -0.950000 | -10.642348817 | -2.634071151 | 16.634714390  | 1 | 0 | 0 | oht |
| 660 | 1 | 6 | -0.950000 | -14.898193535 | 2.961484659  | -15.319631379 | 1 | 0 | 0 | oht |
| 661 | 1 | 2 | 0.425000  | -15.058436833 | 3.078655077  | -16.411736324 | 1 | 0 | 0 | ho  |
| 662 | 1 | 2 | 0.425000  | -10.477610057 | -2.983958974 | -18.650841835 | 1 | 0 | 0 | ho  |
| 663 | 1 | 2 | 0.425000  | -15.052961041 | 3.250098365  | 20.059598264  | 1 | 0 | 0 | ho  |
| 664 | 1 | 2 | 0.425000  | -11.030566564 | -2.533686233 | 17.669755394  | 1 | 0 | 0 | ho  |
| 665 | 1 | 1 | 1.575000  | -7.760648102  | 0.057857326  | 6.343147493   | 1 | 0 | 0 | ao  |
| 666 | 1 | 1 | 1.575000  | -5.173508114  | 0.047832665  | 2.120047493   | 1 | 0 | 0 | ao  |
| 667 | 1 | 1 | 1.575000  | -10.315124157 | 0.041014554  | 7.691610963   | 1 | 0 | 0 | ao  |
| 668 | 1 | 1 | 1.575000  | -7.728120700  | 0.031026926  | 3.468502305   | 1 | 0 | 0 | ao  |
| 669 | 1 | 2 | 0.425000  | -7.209244145  | 1.425163371  | 1.461851013   | 1 | 0 | 0 | ho  |
| 670 | 1 | 2 | 0.425000  | -9.779677472  | 1.523504153  | 5.731312462   | 1 | 0 | 0 | ho  |
| 671 | 1 | 2 | 0.425000  | -5.707935677  | -1.430790090 | 4.082601022   | 1 | 0 | 0 | ho  |
| 672 | 1 | 2 | 0.425000  | -8.279532585  | -1.336757339 | 8.349425190   | 1 | 0 | 0 | ho  |
| 673 | 1 | 3 | -1.050000 | -8.351279233  | -1.017449350 | 4.908780749   | 1 | 0 | 0 | ob  |
| 674 | 1 | 3 | -1.050000 | -8.736316052  | -1.009534011 | 2.223829865   | 1 | 0 | 0 | ob  |
| 675 | 1 | 3 | -1.050000 | -6.162779590  | -1.002235530 | 6.457577115   | 1 | 0 | 0 | ob  |
| 676 | 1 | 3 | -1.050000 | -8.105849550  | -3.254329459 | 3.535812584   | 1 | 0 | 0 | ob  |
| 677 | 1 | 3 | -1.050000 | -5.521256058  | -3.253528090 | 7.754751701   | 1 | 0 | 0 | ob  |
| 678 | 1 | 3 | -1.050000 | -9.718994217  | 1.108160884  | 0.680433991   | 1 | 0 | 0 | ob  |
| 679 | 1 | 3 | -1.050000 | -7.137424505  | 1.106315515  | 4.902851743   | 1 | 0 | 0 | ob  |
| 680 | 1 | 3 | -1.050000 | -7.970074866  | 3.339943172  | 3.727147445   | 1 | 0 | 0 | ob  |
| 681 | 1 | 3 | -1.050000 | -5.396657334  | 3.343459909  | 7.955469793   | 1 | 0 | 0 | ob  |
| 682 | 1 | 3 | -1.050000 | -9.967000490  | 3.342745271  | 2.056943562   | 1 | 0 | 0 | ob  |
| 683 | 1 | 3 | -1.050000 | -7.382440482  | 3.343022387  | 6.275700930   | 1 | 0 | 0 | ob  |
| 684 | 1 | 4 | -0.950000 | -9.351782553  | 1.030057382  | 6.456311812   | 1 | 0 | 0 | oh  |
| 685 | 1 | 4 | -0.950000 | -6.766529560  | 1.017364731  | 2.229260000   | 1 | 0 | 0 | oh  |
| 686 | 1 | 3 | -1.050000 | -7.956609054  | 3.066493209  | 0.417596118   | 1 | 0 | 0 | ob  |
| 687 | 1 | 3 | -1.050000 | -5.362324007  | 3.050340270  | 4.648938892   | 1 | 0 | 0 | ob  |
| 688 | 1 | 4 | -0.950000 | -8.722342777  | -0.928488933 | 7.582229270   | 1 | 0 | 0 | oh  |
| 689 | 1 | 3 | -1.050000 | -10.125648515 | -2.961853389 | 5.162916698   | 1 | 0 | 0 | ob  |
| 690 | 1 | 4 | -0.950000 | -6.136623532  | -0.940763219 | 3.355759607   | 1 | 0 | 0 | oh  |
| 691 | 1 | 3 | -1.050000 | -7.531930266  | -2.977677046 | 0.944364434   | 1 | 0 | 0 | ob  |
| 692 | 1 | 3 | -1.050000 | -9.325662728  | 1.091158613  | 3.353842278   | 1 | 0 | 0 | ob  |
| 693 | 1 | 3 | -1.050000 | -6.752114866  | 1.098365238  | 7.587875661   | 1 | 0 | 0 | ob  |
| 694 | 1 | 3 | -1.050000 | -5.769762377  | -1.019123292 | 0.681739972   | 1 | 0 | 0 | ob  |
| 695 | 1 | 3 | -1.050000 | -10.091865415 | -3.254366293 | 1.856176368   | 1 | 0 | 0 | ob  |
| 696 | 1 | 3 | -1.050000 | -7.517912729  | -3.251063569 | 6.084357725   | 1 | 0 | 0 | ob  |

|     |   |   |           |               |              |               |   |   |   |   |     |
|-----|---|---|-----------|---------------|--------------|---------------|---|---|---|---|-----|
| 697 | 1 | 5 | 2.100000  | -9.448596523  | 2.720599038  | 3.452486522   | 1 | 0 | 0 | # | st  |
| 698 | 1 | 5 | 2.100000  | -6.876570783  | 2.729580341  | 7.680379551   | 1 | 0 | 0 | # | st  |
| 699 | 1 | 5 | 2.100000  | -5.953223949  | -2.638063392 | 0.744074984   | 1 | 0 | 0 | # | st  |
| 700 | 1 | 5 | 2.100000  | -8.611866039  | -2.640760033 | 2.131278354   | 1 | 0 | 0 | # | st  |
| 701 | 1 | 5 | 2.100000  | -6.039449750  | -2.631682580 | 6.359024273   | 1 | 0 | 0 | # | st  |
| 702 | 1 | 5 | 2.100000  | -9.535321161  | 2.727049911  | 0.617961151   | 1 | 0 | 0 | # | st  |
| 703 | 1 | 5 | 2.100000  | -6.946927332  | 2.723397425  | 4.839744045   | 1 | 0 | 0 | # | st  |
| 704 | 1 | 5 | 2.100000  | -8.541181255  | -2.634695815 | 4.971778212   | 1 | 0 | 0 | # | st  |
| 705 | 1 | 1 | 1.575000  | -7.760648102  | 0.057857326  | 14.792747493  | 1 | 0 | 0 | # | ao  |
| 706 | 1 | 1 | 1.575000  | -5.173508114  | 0.047832665  | 10.569647493  | 1 | 0 | 0 | # | ao  |
| 707 | 1 | 1 | 1.575000  | -10.315124157 | 0.041014554  | 16.141210963  | 1 | 0 | 0 | # | ao  |
| 708 | 1 | 1 | 1.575000  | -7.728120700  | 0.031026926  | 11.918102305  | 1 | 0 | 0 | # | ao  |
| 709 | 1 | 2 | 0.425000  | -7.209244145  | 1.425163371  | 9.911451013   | 1 | 0 | 0 | # | ho  |
| 710 | 1 | 2 | 0.425000  | -9.779677472  | 1.523504153  | 14.180912462  | 1 | 0 | 0 | # | ho  |
| 711 | 1 | 2 | 0.425000  | -5.707935677  | -1.430790090 | 12.532201022  | 1 | 0 | 0 | # | ho  |
| 712 | 1 | 2 | 0.425000  | -8.279532585  | -1.336757339 | 16.799025190  | 1 | 0 | 0 | # | ho  |
| 713 | 1 | 3 | -1.050000 | -8.351279233  | -1.017449350 | 13.358380749  | 1 | 0 | 0 | # | ob  |
| 714 | 1 | 3 | -1.050000 | -8.736316052  | -1.009534011 | 10.673429865  | 1 | 0 | 0 | # | ob  |
| 715 | 1 | 3 | -1.050000 | -6.162779590  | -1.002235530 | 14.907177115  | 1 | 0 | 0 | # | ob  |
| 716 | 1 | 3 | -1.050000 | -8.105849550  | -3.254329459 | 11.985412584  | 1 | 0 | 0 | # | ob  |
| 717 | 1 | 6 | -0.950000 | -5.521256058  | -3.253528090 | -17.594048299 | 1 | 0 | 0 | # | oht |
| 718 | 1 | 3 | -1.050000 | -9.718994217  | 1.108160884  | 9.130033991   | 1 | 0 | 0 | # | ob  |
| 719 | 1 | 3 | -1.050000 | -7.137424505  | 1.106315515  | 13.352451743  | 1 | 0 | 0 | # | ob  |
| 720 | 1 | 3 | -1.050000 | -7.970074866  | 3.339943172  | 12.176747445  | 1 | 0 | 0 | # | ob  |
| 721 | 1 | 3 | -1.050000 | -5.396657334  | 3.343459909  | 16.405069793  | 1 | 0 | 0 | # | ob  |
| 722 | 1 | 3 | -1.050000 | -9.967000490  | 3.342745271  | 10.506543562  | 1 | 0 | 0 | # | ob  |
| 723 | 1 | 3 | -1.050000 | -7.382440482  | 3.343022387  | 14.725300930  | 1 | 0 | 0 | # | ob  |
| 724 | 1 | 4 | -0.950000 | -9.351782553  | 1.030057382  | 14.905911812  | 1 | 0 | 0 | # | oh  |
| 725 | 1 | 4 | -0.950000 | -6.766529560  | 1.017364731  | 10.678860000  | 1 | 0 | 0 | # | oh  |
| 726 | 1 | 3 | -1.050000 | -7.956609054  | 3.066493209  | 8.867196118   | 1 | 0 | 0 | # | ob  |
| 727 | 1 | 3 | -1.050000 | -5.362324007  | 3.050340270  | 13.098538892  | 1 | 0 | 0 | # | ob  |
| 728 | 1 | 7 | -0.950000 | -8.722234277  | -0.928488933 | 16.031829270  | 1 | 0 | 0 | # | oho |
| 729 | 1 | 3 | -1.050000 | -10.125648515 | -2.961853389 | 13.612516698  | 1 | 0 | 0 | # | ob  |
| 730 | 1 | 4 | -0.950000 | -6.136623532  | -0.940763219 | 11.805359607  | 1 | 0 | 0 | # | oh  |
| 731 | 1 | 3 | -1.050000 | -7.531930266  | -2.977677046 | 9.393964434   | 1 | 0 | 0 | # | ob  |
| 732 | 1 | 3 | -1.050000 | -9.325662728  | 1.091158613  | 11.803442278  | 1 | 0 | 0 | # | ob  |
| 733 | 1 | 3 | -1.050000 | -6.752114866  | 1.098365238  | 16.037475661  | 1 | 0 | 0 | # | ob  |
| 734 | 1 | 3 | -1.050000 | -5.769762377  | -1.019123292 | 9.131339972   | 1 | 0 | 0 | # | ob  |
| 735 | 1 | 3 | -1.050000 | -10.091865415 | -3.254366293 | 10.305776368  | 1 | 0 | 0 | # | ob  |
| 736 | 1 | 3 | -1.050000 | -7.517912729  | -3.251063569 | 14.533957725  | 1 | 0 | 0 | # | ob  |
| 737 | 1 | 5 | 2.100000  | -9.448596523  | 2.720599038  | 11.902086522  | 1 | 0 | 0 | # | st  |
| 738 | 1 | 5 | 2.100000  | -6.876570783  | 2.729580341  | 16.129979551  | 1 | 0 | 0 | # | st  |
| 739 | 1 | 5 | 2.100000  | -5.953223949  | -2.638063392 | 0.9193674984  | 1 | 0 | 0 | # | st  |
| 740 | 1 | 5 | 2.100000  | -8.611866039  | -2.640760033 | 10.580878354  | 1 | 0 | 0 | # | st  |
| 741 | 1 | 5 | 2.100000  | -6.039449750  | -2.631682580 | 14.808624273  | 1 | 0 | 0 | # | st  |
| 742 | 1 | 5 | 2.100000  | -9.535321161  | 2.727049911  | 0.9067561151  | 1 | 0 | 0 | # | st  |
| 743 | 1 | 5 | 2.100000  | -6.946927332  | 2.723397425  | 13.289344045  | 1 | 0 | 0 | # | st  |
| 744 | 1 | 5 | 2.100000  | -8.541181255  | -2.634695815 | 13.421378212  | 1 | 0 | 0 | # | st  |
| 745 | 1 | 1 | 1.575000  | -7.760648102  | 0.057857326  | -10.556052507 | 1 | 0 | 0 | # | ao  |
| 746 | 1 | 1 | 1.575000  | -5.173508114  | 0.047832665  | -14.779152507 | 1 | 0 | 0 | # | ao  |
| 747 | 1 | 1 | 1.575000  | -10.315124157 | 0.041014554  | -9.207589037  | 1 | 0 | 0 | # | ao  |
| 748 | 1 | 1 | 1.575000  | -7.728120700  | 0.031026926  | -13.430697695 | 1 | 0 | 0 | # | ao  |
| 749 | 1 | 2 | 0.425000  | -7.209244145  | 1.425163371  | -15.437348987 | 1 | 0 | 0 | # | ho  |
| 750 | 1 | 2 | 0.425000  | -9.779677472  | 1.523504153  | -11.167887538 | 1 | 0 | 0 | # | ho  |
| 751 | 1 | 2 | 0.425000  | -5.707935677  | -1.430790090 | -12.816598978 | 1 | 0 | 0 | # | ho  |
| 752 | 1 | 2 | 0.425000  | -8.279532585  | -1.336757339 | -8.549774810  | 1 | 0 | 0 | # | ho  |
| 753 | 1 | 3 | -1.050000 | -8.351279233  | -1.017449350 | -11.990419251 | 1 | 0 | 0 | # | ob  |
| 754 | 1 | 3 | -1.050000 | -8.736316052  | -1.009534011 | -14.675370135 | 1 | 0 | 0 | # | ob  |
| 755 | 1 | 3 | -1.050000 | -6.162779590  | -1.002235530 | -10.441622885 | 1 | 0 | 0 | # | ob  |
| 756 | 1 | 3 | -1.050000 | -8.105849550  | -3.254329459 | -13.363387416 | 1 | 0 | 0 | # | ob  |
| 757 | 1 | 3 | -1.050000 | -5.521256058  | -3.253528090 | -9.144448299  | 1 | 0 | 0 | # | ob  |
| 758 | 1 | 3 | -1.050000 | -9.718994217  | 1.108160884  | 17.579633991  | 1 | 0 | 0 | # | ob  |
| 759 | 1 | 3 | -1.050000 | -7.137424505  | 1.106315515  | -11.996348257 | 1 | 0 | 0 | # | ob  |
| 760 | 1 | 3 | -1.050000 | -7.970074866  | 3.339943172  | -13.172052555 | 1 | 0 | 0 | # | ob  |
| 761 | 1 | 3 | -1.050000 | -5.396657334  | 3.343459909  | -8.943730207  | 1 | 0 | 0 | # | ob  |
| 762 | 1 | 6 | -0.950000 | -9.967000490  | 3.342745271  | 18.956143562  | 1 | 0 | 0 | # | oht |
| 763 | 1 | 3 | -1.050000 | -7.382440482  | 3.343022387  | -10.623499070 | 1 | 0 | 0 | # | ob  |
| 764 | 1 | 4 | -0.950000 | -9.351782553  | 1.030057382  | -10.442888188 | 1 | 0 | 0 | # | oh  |
| 765 | 1 | 7 | -0.950000 | -6.766529560  | 1.017364731  | -14.669940000 | 1 | 0 | 0 | # | oho |
| 766 | 1 | 3 | -1.050000 | -7.956609054  | 3.066493209  | 17.316796118  | 1 | 0 | 0 | # | ob  |
| 767 | 1 | 3 | -1.050000 | -5.362324007  | 3.050340270  | -12.250261108 | 1 | 0 | 0 | # | ob  |
| 768 | 1 | 4 | -0.950000 | -8.722234277  | -0.928488933 | -9.316970730  | 1 | 0 | 0 | # | ob  |
| 769 | 1 | 3 | -1.050000 | -10.125648515 | -2.961853389 | -11.736283302 | 1 | 0 | 0 | # | ob  |
| 770 | 1 | 4 | -0.950000 | -6.136623532  | -0.940763219 | -13.543440393 | 1 | 0 | 0 | # | oh  |
| 771 | 1 | 3 | -1.050000 | -7.531930266  | -2.977677046 | -15.954835566 | 1 | 0 | 0 | # | ob  |
| 772 | 1 | 3 | -1.050000 | -9.325662728  | 1.091158613  | -13.545357722 | 1 | 0 | 0 | # | ob  |
| 773 | 1 | 3 | -1.050000 | -6.752114866  | 1.098365238  | -9.311324339  | 1 | 0 | 0 | # | ob  |
| 774 | 1 | 3 | -1.050000 | -5.769762377  | -1.019123292 | -16.217460028 | 1 | 0 | 0 | # | ob  |
| 775 | 1 | 3 | -1.050000 | -10.091865415 | -3.254366293 | -15.003023632 | 1 | 0 | 0 | # | ob  |
| 776 | 1 | 3 | -1.050000 | -7.517912729  | -3.251063569 | -10.814842275 | 1 | 0 | 0 | # | ob  |
| 777 | 1 | 5 | 2.100000  | -9.448596523  | 2.720599038  | -13.446713478 | 1 | 0 | 0 | # | st  |
| 778 | 1 | 5 | 2.100000  | -6.876570783  | 2.729580341  | -9.218820449  | 1 | 0 | 0 | # | st  |
| 779 | 1 | 5 | 2.100000  | -5.953223949  | -2.638063392 | -16.155125016 | 1 | 0 | 0 | # | st  |
| 780 | 1 | 5 | 2.100000  | -8.611866039  | -2.640760033 | -14.767921646 | 1 | 0 | 0 | # | st  |
| 781 | 1 | 5 | 2.100000  | -6.039449750  | -2.631682580 | -10.540175727 | 1 | 0 | 0 | # | st  |
| 782 | 1 | 5 | 2.100000  | -9.535321161  | 2.727049911  | 17.517161151  | 1 | 0 | 0 | # | st  |
| 783 | 1 | 5 | 2.100000  | -6.946927332  | 2.723397425  | -12.059455955 | 1 | 0 | 0 | # | st  |
| 784 | 1 | 5 | 2.100000  | -8.541181255  | -2.634695815 | -11.927421788 | 1 | 0 | 0 | # | st  |
| 785 | 1 | 1 | 1.575000  | -7.760648102  | 0.057857326  | -2.106452507  | 1 | 0 | 0 | # | ao  |
| 786 | 1 | 1 | 1.575000  | -5.173508114  | 0.047832665  | -6.329552507  | 1 | 0 | 0 | # | ao  |
| 787 | 1 | 1 | 1.575000  | -10.315124157 | 0.041014554  | -0.757989037  | 1 | 0 | 0 | # | ao  |
| 788 | 1 | 1 | 1.575000  | -7.728120700  | 0.031026926  | -4.981097695  | 1 | 0 | 0 | # | ao  |
| 789 | 1 | 2 | 0.425000  | -7.209244145  | 1.425163371  | -6.987748987  | 1 | 0 | 0 | # | ho  |

|     |   |   |           |               |              |               |   |   |   |   |     |
|-----|---|---|-----------|---------------|--------------|---------------|---|---|---|---|-----|
| 790 | 1 | 2 | 0.425000  | -9.779677472  | 1.523504153  | -2.718287538  | 1 | 0 | 0 | # | ho  |
| 791 | 1 | 2 | 0.425000  | -5.707935677  | -1.430790090 | -4.366998978  | 1 | 0 | 0 | # | ho  |
| 792 | 1 | 2 | 0.425000  | -8.279532585  | -1.336757339 | -0.100174810  | 1 | 0 | 0 | # | ho  |
| 793 | 1 | 3 | -1.050000 | -8.351279233  | -1.017449350 | -3.540819251  | 1 | 0 | 0 | # | ob  |
| 794 | 1 | 3 | -1.050000 | -8.736316052  | -1.009534011 | -6.225770135  | 1 | 0 | 0 | # | ob  |
| 795 | 1 | 3 | -1.050000 | -6.162779590  | -1.002235530 | -1.992022885  | 1 | 0 | 0 | # | ob  |
| 796 | 1 | 3 | -1.050000 | -8.105849550  | -3.254329459 | -4.913787416  | 1 | 0 | 0 | # | ob  |
| 797 | 1 | 3 | -1.050000 | -5.521256058  | -3.253528090 | -0.694848299  | 1 | 0 | 0 | # | ob  |
| 798 | 1 | 3 | -1.050000 | -9.718994217  | 1.108160884  | -7.769166009  | 1 | 0 | 0 | # | ob  |
| 799 | 1 | 3 | -1.050000 | -7.137424505  | 1.106315515  | -3.546748257  | 1 | 0 | 0 | # | ob  |
| 800 | 1 | 3 | -1.050000 | -7.970074866  | 3.339943172  | -4.722452555  | 1 | 0 | 0 | # | ob  |
| 801 | 1 | 3 | -1.050000 | -5.396657334  | 3.343459909  | -0.494130207  | 1 | 0 | 0 | # | ob  |
| 802 | 1 | 3 | -1.050000 | -9.967000490  | 3.342745271  | -6.392656438  | 1 | 0 | 0 | # | ob  |
| 803 | 1 | 3 | -1.050000 | -7.382440482  | 3.343022387  | -2.173899070  | 1 | 0 | 0 | # | ob  |
| 804 | 1 | 4 | -0.950000 | -9.351782553  | 1.030057382  | -1.993288188  | 1 | 0 | 0 | # | oh  |
| 805 | 1 | 4 | -0.950000 | -6.766529560  | 1.017364731  | -6.220340000  | 1 | 0 | 0 | # | oh  |
| 806 | 1 | 3 | -1.050000 | -7.956609054  | 3.066493209  | -8.032003882  | 1 | 0 | 0 | # | ob  |
| 807 | 1 | 3 | -1.050000 | -5.362324007  | 3.050340270  | -3.800661108  | 1 | 0 | 0 | # | ob  |
| 808 | 1 | 4 | -0.950000 | -8.722234277  | -0.928489933 | -0.867370730  | 1 | 0 | 0 | # | oh  |
| 809 | 1 | 3 | -1.050000 | -10.125648515 | -2.961853389 | -3.286683302  | 1 | 0 | 0 | # | ob  |
| 810 | 1 | 4 | -0.950000 | -6.136623532  | -0.940763219 | -5.093840393  | 1 | 0 | 0 | # | oh  |
| 811 | 1 | 3 | -1.050000 | -7.531930266  | -2.977677046 | -7.505235566  | 1 | 0 | 0 | # | ob  |
| 812 | 1 | 3 | -1.050000 | -9.325662728  | 1.091158613  | -5.095757722  | 1 | 0 | 0 | # | ob  |
| 813 | 1 | 3 | -1.050000 | -6.752114866  | 1.098365238  | -0.861724339  | 1 | 0 | 0 | # | ob  |
| 814 | 1 | 3 | -1.050000 | -5.769762377  | -1.019123292 | -7.767860028  | 1 | 0 | 0 | # | ob  |
| 815 | 1 | 3 | -1.050000 | -10.091865415 | -3.254366293 | -6.593423632  | 1 | 0 | 0 | # | ob  |
| 816 | 1 | 3 | -1.050000 | -7.517912729  | -3.251063569 | -2.365242275  | 1 | 0 | 0 | # | ob  |
| 817 | 1 | 5 | 2.100000  | -9.448596523  | 2.720599038  | -4.997113478  | 1 | 0 | 0 | # | st  |
| 818 | 1 | 5 | 2.100000  | -6.876570783  | 2.729580341  | -0.769220449  | 1 | 0 | 0 | # | st  |
| 819 | 1 | 5 | 2.100000  | -5.953223949  | -2.638063392 | -7.705525016  | 1 | 0 | 0 | # | st  |
| 820 | 1 | 5 | 2.100000  | -8.611866039  | -2.640760033 | -6.318321646  | 1 | 0 | 0 | # | st  |
| 821 | 1 | 5 | 2.100000  | -6.039449750  | -2.631682580 | -2.090575727  | 1 | 0 | 0 | # | st  |
| 822 | 1 | 5 | 2.100000  | -9.535321161  | 2.727049911  | -7.831638849  | 1 | 0 | 0 | # | st  |
| 823 | 1 | 5 | 2.100000  | -6.946927332  | 2.723397425  | -3.609855955  | 1 | 0 | 0 | # | st  |
| 824 | 1 | 5 | 2.100000  | -8.541181255  | -2.634695815 | -3.477821788  | 1 | 0 | 0 | # | st  |
| 825 | 1 | 6 | -0.950000 | -5.479548817  | -2.634071151 | 16.634714390  | 1 | 0 | 0 | # | oht |
| 826 | 1 | 6 | -0.950000 | -9.735393535  | 2.961484659  | -15.319631379 | 1 | 0 | 0 | # | oht |
| 827 | 1 | 2 | 0.425000  | -9.895636833  | 3.078655077  | -16.411736324 | 1 | 0 | 0 | # | ho  |
| 828 | 1 | 2 | 0.425000  | -5.314810057  | -2.983958974 | -18.650841835 | 1 | 0 | 0 | # | ho  |
| 829 | 1 | 2 | 0.425000  | -9.890161041  | 3.250098365  | 20.059598264  | 1 | 0 | 0 | # | ho  |
| 830 | 1 | 2 | 0.425000  | -5.867766564  | -2.533686233 | 17.669755394  | 1 | 0 | 0 | # | ho  |
| 831 | 1 | 1 | 1.575000  | -2.597848102  | 0.057857326  | 6.343147493   | 1 | 0 | 0 | # | ao  |
| 832 | 1 | 1 | 1.575000  | -0.010708114  | 0.047832665  | 2.120047493   | 1 | 0 | 0 | # | ao  |
| 833 | 1 | 1 | 1.575000  | -5.152324157  | 0.041014554  | 7.691610963   | 1 | 0 | 0 | # | ao  |
| 834 | 1 | 1 | 1.575000  | -2.565320700  | 0.031026926  | 3.468502305   | 1 | 0 | 0 | # | ao  |
| 835 | 1 | 2 | 0.425000  | -2.046444145  | 1.425163371  | 1.461851013   | 1 | 0 | 0 | # | ho  |
| 836 | 1 | 2 | 0.425000  | -4.616877472  | 1.523504153  | 5.731312462   | 1 | 0 | 0 | # | ho  |
| 837 | 1 | 2 | 0.425000  | -0.545135677  | -1.430790090 | 4.082601022   | 1 | 0 | 0 | # | ho  |
| 838 | 1 | 2 | 0.425000  | -3.116732585  | -1.336757339 | 8.349425190   | 1 | 0 | 0 | # | ho  |
| 839 | 1 | 3 | -1.050000 | -3.188479233  | -1.017449350 | 4.908780749   | 1 | 0 | 0 | # | ob  |
| 840 | 1 | 3 | -1.050000 | -3.573516052  | -1.009534011 | 2.223829865   | 1 | 0 | 0 | # | ob  |
| 841 | 1 | 3 | -1.050000 | -0.999979590  | -1.002235530 | 6.457577115   | 1 | 0 | 0 | # | ob  |
| 842 | 1 | 3 | -1.050000 | -2.943049550  | -3.254329459 | 3.535812584   | 1 | 0 | 0 | # | ob  |
| 843 | 1 | 3 | -1.050000 | -0.358456058  | -3.253528090 | 7.754751701   | 1 | 0 | 0 | # | ob  |
| 844 | 1 | 3 | -1.050000 | -4.556194217  | 1.108160884  | 0.680433991   | 1 | 0 | 0 | # | ob  |
| 845 | 1 | 3 | -1.050000 | -1.974624505  | 1.106315515  | 4.902851743   | 1 | 0 | 0 | # | ob  |
| 846 | 1 | 3 | -1.050000 | -2.807274866  | 3.339943172  | 3.727147445   | 1 | 0 | 0 | # | ob  |
| 847 | 1 | 3 | -1.050000 | -0.233857334  | 3.343459909  | 7.955469793   | 1 | 0 | 0 | # | ob  |
| 848 | 1 | 3 | -1.050000 | -4.804200490  | 3.342745271  | 2.056943562   | 1 | 0 | 0 | # | ob  |
| 849 | 1 | 3 | -1.050000 | -2.219640482  | 3.343022387  | 6.275700930   | 1 | 0 | 0 | # | ob  |
| 850 | 1 | 4 | -0.950000 | -4.188982553  | 1.030057382  | 6.456311812   | 1 | 0 | 0 | # | oh  |
| 851 | 1 | 4 | -0.950000 | -1.603729560  | 1.017364731  | 2.229260000   | 1 | 0 | 0 | # | oh  |
| 852 | 1 | 3 | -1.050000 | -2.793809054  | 3.066493209  | 0.417596118   | 1 | 0 | 0 | # | ob  |
| 853 | 1 | 3 | -1.050000 | -0.199524007  | 3.050340270  | 4.648938892   | 1 | 0 | 0 | # | ob  |
| 854 | 1 | 4 | -0.950000 | -3.559434277  | -0.928489933 | 7.582229270   | 1 | 0 | 0 | # | oh  |
| 855 | 1 | 3 | -1.050000 | -4.962848515  | -2.961853389 | 5.162916698   | 1 | 0 | 0 | # | ob  |
| 856 | 1 | 4 | -0.950000 | -0.973823532  | -0.940763219 | 3.355759607   | 1 | 0 | 0 | # | oh  |
| 857 | 1 | 3 | -1.050000 | -2.369130266  | -2.977677046 | 0.944364434   | 1 | 0 | 0 | # | ob  |
| 858 | 1 | 3 | -1.050000 | -4.162862728  | 1.091158613  | 3.353842278   | 1 | 0 | 0 | # | ob  |
| 859 | 1 | 3 | -1.050000 | -1.589314866  | 1.098365238  | 7.587875661   | 1 | 0 | 0 | # | ob  |
| 860 | 1 | 3 | -1.050000 | -0.606962377  | -1.019123292 | 0.681739972   | 1 | 0 | 0 | # | ob  |
| 861 | 1 | 3 | -1.050000 | -4.929065415  | -3.254366293 | 1.856176368   | 1 | 0 | 0 | # | ob  |
| 862 | 1 | 3 | -1.050000 | -2.355112729  | -3.251063569 | 6.084357725   | 1 | 0 | 0 | # | ob  |
| 863 | 1 | 5 | 2.100000  | -4.285796523  | 2.720599038  | 3.452486522   | 1 | 0 | 0 | # | st  |
| 864 | 1 | 5 | 2.100000  | -1.713770783  | 2.729580341  | 7.680379551   | 1 | 0 | 0 | # | st  |
| 865 | 1 | 5 | 2.100000  | -0.790423949  | -2.638063392 | 0.744074984   | 1 | 0 | 0 | # | st  |
| 866 | 1 | 5 | 2.100000  | -3.449066039  | -2.640760033 | 2.131278354   | 1 | 0 | 0 | # | st  |
| 867 | 1 | 5 | 2.100000  | -0.876649750  | -2.631682580 | 6.359024273   | 1 | 0 | 0 | # | st  |
| 868 | 1 | 5 | 2.100000  | -4.372521161  | 2.727049911  | 0.617961151   | 1 | 0 | 0 | # | st  |
| 869 | 1 | 5 | 2.100000  | -1.784127332  | 2.723397425  | 4.839744045   | 1 | 0 | 0 | # | st  |
| 870 | 1 | 5 | 2.100000  | -3.378381255  | -2.634695815 | 4.971778212   | 1 | 0 | 0 | # | st  |
| 871 | 1 | 1 | 1.575000  | -2.597848102  | 0.057857326  | 14.792747493  | 1 | 0 | 0 | # | ao  |
| 872 | 1 | 1 | 1.575000  | -0.010708114  | 0.047832665  | 10.569647493  | 1 | 0 | 0 | # | ao  |
| 873 | 1 | 1 | 1.575000  | -5.152324157  | 0.041014554  | 16.141210963  | 1 | 0 | 0 | # | ao  |
| 874 | 1 | 1 | 1.575000  | -2.565320700  | 0.031026926  | 11.918102305  | 1 | 0 | 0 | # | ao  |
| 875 | 1 | 2 | 0.425000  | -2.046444145  | 1.425163371  | 9.911451013   | 1 | 0 | 0 | # | ho  |
| 876 | 1 | 2 | 0.425000  | -4.616877472  | 1.523504153  | 14.180912462  | 1 | 0 | 0 | # | ho  |
| 877 | 1 | 2 | 0.425000  | -0.545135677  | -1.430790090 | 12.532201022  | 1 | 0 | 0 | # | ho  |
| 878 | 1 | 2 | 0.425000  | -3.116732585  | -1.336757339 | 16.799025190  | 1 | 0 | 0 | # | ho  |
| 879 | 1 | 3 | -1.050000 | -3.188479233  | -1.017449350 | 13.358380749  | 1 | 0 | 0 | # | ob  |
| 880 | 1 | 3 | -1.050000 | -3.573516052  | -1.009534011 | 10.673429865  | 1 | 0 | 0 | # | ob  |
| 881 | 1 | 3 | -1.050000 | -0.999979590  | -1.002235530 | 14.907177115  | 1 | 0 | 0 | # | ob  |
| 882 | 1 | 3 | -1.050000 | -2.943049550  | -3.254329459 | 11.985412584  | 1 | 0 | 0 | # | ob  |

|     |   |   |           |              |              |               |   |   |   |   |     |
|-----|---|---|-----------|--------------|--------------|---------------|---|---|---|---|-----|
| 883 | 1 | 6 | -0.950000 | -0.358456058 | -3.253528090 | -17.594048299 | 1 | 0 | 0 | # | oht |
| 884 | 1 | 3 | -1.050000 | -4.556194217 | 1.108160884  | 9.130033991   | 1 | 0 | 0 | # | ob  |
| 885 | 1 | 3 | -1.050000 | -1.974624505 | 1.106315515  | 13.352451743  | 1 | 0 | 0 | # | ob  |
| 886 | 1 | 3 | -1.050000 | -2.807274866 | 3.339943172  | 12.176747445  | 1 | 0 | 0 | # | ob  |
| 887 | 1 | 3 | -1.050000 | -0.233857334 | 3.343459909  | 16.405069793  | 1 | 0 | 0 | # | ob  |
| 888 | 1 | 3 | -1.050000 | -4.804200490 | 3.342745271  | 10.506543562  | 1 | 0 | 0 | # | ob  |
| 889 | 1 | 3 | -1.050000 | -2.219640482 | 3.343022387  | 14.725300930  | 1 | 0 | 0 | # | ob  |
| 890 | 1 | 4 | -0.950000 | -4.188982553 | 1.030057382  | 14.905911812  | 1 | 0 | 0 | # | oh  |
| 891 | 1 | 4 | -0.950000 | -1.603729560 | 1.017364731  | 10.678860000  | 1 | 0 | 0 | # | oh  |
| 892 | 1 | 3 | -1.050000 | -2.793809054 | 3.066493209  | 8.867196118   | 1 | 0 | 0 | # | ob  |
| 893 | 1 | 3 | -1.050000 | -0.199524007 | 3.050340270  | 13.098538892  | 1 | 0 | 0 | # | ob  |
| 894 | 1 | 7 | -0.950000 | -3.559434277 | -0.928489933 | 16.031829270  | 1 | 0 | 0 | # | oho |
| 895 | 1 | 3 | -1.050000 | -4.962848515 | -2.961853389 | 13.612516698  | 1 | 0 | 0 | # | ob  |
| 896 | 1 | 4 | -0.950000 | -0.973823532 | -0.940763219 | 11.805359607  | 1 | 0 | 0 | # | oh  |
| 897 | 1 | 3 | -1.050000 | -2.369130266 | -2.977677046 | 9.393964434   | 1 | 0 | 0 | # | ob  |
| 898 | 1 | 3 | -1.050000 | -4.162862728 | 1.091158613  | 11.803442278  | 1 | 0 | 0 | # | ob  |
| 899 | 1 | 3 | -1.050000 | -1.589314866 | 1.098365238  | 16.037475661  | 1 | 0 | 0 | # | ob  |
| 900 | 1 | 3 | -1.050000 | -0.606962377 | -1.019123292 | 9.131339972   | 1 | 0 | 0 | # | ob  |
| 901 | 1 | 3 | -1.050000 | -4.929065415 | -3.254366293 | 10.305776368  | 1 | 0 | 0 | # | ob  |
| 902 | 1 | 3 | -1.050000 | -2.355112729 | -3.251063569 | 14.533957725  | 1 | 0 | 0 | # | ob  |
| 903 | 1 | 5 | 2.100000  | -4.285796523 | 2.720599038  | 11.902086522  | 1 | 0 | 0 | # | st  |
| 904 | 1 | 5 | 2.100000  | -1.713770783 | 2.729580341  | 16.129979551  | 1 | 0 | 0 | # | st  |
| 905 | 1 | 5 | 2.100000  | -0.790423949 | -2.638063392 | 9.193674984   | 1 | 0 | 0 | # | st  |
| 906 | 1 | 5 | 2.100000  | -3.449066039 | -2.640760033 | 10.580878354  | 1 | 0 | 0 | # | st  |
| 907 | 1 | 5 | 2.100000  | -0.876649750 | -2.631682580 | 14.808624273  | 1 | 0 | 0 | # | st  |
| 908 | 1 | 5 | 2.100000  | -4.372521161 | 2.727049911  | 9.067561151   | 1 | 0 | 0 | # | st  |
| 909 | 1 | 5 | 2.100000  | -1.784127332 | 2.723397425  | 13.289344045  | 1 | 0 | 0 | # | st  |
| 910 | 1 | 5 | 2.100000  | -3.378381255 | -2.634695815 | 13.421378212  | 1 | 0 | 0 | # | st  |
| 911 | 1 | 1 | 1.575000  | -2.597848102 | 0.057857326  | -10.556052507 | 1 | 0 | 0 | # | ao  |
| 912 | 1 | 1 | 1.575000  | -0.010708114 | 0.047832665  | -14.779152507 | 1 | 0 | 0 | # | ao  |
| 913 | 1 | 1 | 1.575000  | -5.152324157 | 0.041014554  | -9.207589037  | 1 | 0 | 0 | # | ao  |
| 914 | 1 | 1 | 1.575000  | -2.565320700 | 0.031026926  | -13.430697695 | 1 | 0 | 0 | # | ao  |
| 915 | 1 | 2 | 0.425000  | -2.046444145 | 1.425163371  | -15.437348987 | 1 | 0 | 0 | # | ho  |
| 916 | 1 | 2 | 0.425000  | -4.616877472 | 1.523504153  | -11.167887538 | 1 | 0 | 0 | # | ho  |
| 917 | 1 | 2 | 0.425000  | -0.545135677 | -1.430790090 | -12.816598978 | 1 | 0 | 0 | # | ho  |
| 918 | 1 | 2 | 0.425000  | -3.116732585 | -1.336757339 | -8.549774810  | 1 | 0 | 0 | # | ho  |
| 919 | 1 | 3 | -1.050000 | -3.188479233 | -1.017449350 | -11.990419251 | 1 | 0 | 0 | # | ob  |
| 920 | 1 | 3 | -1.050000 | -3.573516052 | -1.009534011 | -14.675370135 | 1 | 0 | 0 | # | ob  |
| 921 | 1 | 3 | -1.050000 | -0.999979590 | -1.002235530 | -10.441622885 | 1 | 0 | 0 | # | ob  |
| 922 | 1 | 3 | -1.050000 | -2.943049550 | -3.254329459 | -13.363387416 | 1 | 0 | 0 | # | ob  |
| 923 | 1 | 3 | -1.050000 | -0.358456058 | -3.253528090 | -9.144448299  | 1 | 0 | 0 | # | ob  |
| 924 | 1 | 3 | -1.050000 | -4.556194217 | 1.108160884  | 17.579633991  | 1 | 0 | 0 | # | ob  |
| 925 | 1 | 3 | -1.050000 | -1.974624505 | 1.106315515  | -11.996348257 | 1 | 0 | 0 | # | ob  |
| 926 | 1 | 3 | -1.050000 | -2.807274866 | 3.339943172  | -13.172052555 | 1 | 0 | 0 | # | ob  |
| 927 | 1 | 3 | -1.050000 | -0.233857334 | 3.343459909  | -8.943730207  | 1 | 0 | 0 | # | ob  |
| 928 | 1 | 6 | -0.950000 | -4.804200490 | 3.342745271  | 18.956143562  | 1 | 0 | 0 | # | oht |
| 929 | 1 | 3 | -1.050000 | -2.219640482 | 3.343022387  | -10.623499070 | 1 | 0 | 0 | # | ob  |
| 930 | 1 | 4 | -0.950000 | -4.188982553 | 1.030057382  | -10.442888188 | 1 | 0 | 0 | # | oh  |
| 931 | 1 | 7 | -0.950000 | -1.603729560 | 1.017364731  | -14.669940000 | 1 | 0 | 0 | # | oho |
| 932 | 1 | 3 | -1.050000 | -2.793809054 | 3.066493209  | 17.316796118  | 1 | 0 | 0 | # | ob  |
| 933 | 1 | 3 | -1.050000 | -0.199524007 | 3.050340270  | -12.250261108 | 1 | 0 | 0 | # | ob  |
| 934 | 1 | 4 | -0.950000 | -3.559434277 | -0.928489933 | -9.316970730  | 1 | 0 | 0 | # | oh  |
| 935 | 1 | 3 | -1.050000 | -4.962848515 | -2.961853389 | -11.736283302 | 1 | 0 | 0 | # | ob  |
| 936 | 1 | 4 | -0.950000 | -0.973823532 | -0.940763219 | -13.543440393 | 1 | 0 | 0 | # | oh  |
| 937 | 1 | 3 | -1.050000 | -2.369130266 | -2.977677046 | -15.954835566 | 1 | 0 | 0 | # | ob  |
| 938 | 1 | 3 | -1.050000 | -4.162862728 | 1.091158613  | -13.545357722 | 1 | 0 | 0 | # | ob  |
| 939 | 1 | 3 | -1.050000 | -1.589314866 | 1.098365238  | -9.311324339  | 1 | 0 | 0 | # | ob  |
| 940 | 1 | 3 | -1.050000 | -0.606962377 | -1.019123292 | -16.217460028 | 1 | 0 | 0 | # | ob  |
| 941 | 1 | 3 | -1.050000 | -4.929065415 | -3.254366293 | -15.043023632 | 1 | 0 | 0 | # | ob  |
| 942 | 1 | 3 | -1.050000 | -2.355112729 | -3.251063569 | -10.814842275 | 1 | 0 | 0 | # | ob  |
| 943 | 1 | 5 | 2.100000  | -4.285796523 | 2.720599038  | -13.446713478 | 1 | 0 | 0 | # | st  |
| 944 | 1 | 5 | 2.100000  | -1.713770783 | 2.729580341  | -9.218820449  | 1 | 0 | 0 | # | st  |
| 945 | 1 | 5 | 2.100000  | -0.790423949 | -2.638063392 | -16.155125016 | 1 | 0 | 0 | # | st  |
| 946 | 1 | 5 | 2.100000  | -3.449066039 | -2.640760033 | -14.767921646 | 1 | 0 | 0 | # | st  |
| 947 | 1 | 5 | 2.100000  | -0.876649750 | -2.631682580 | -10.540175727 | 1 | 0 | 0 | # | st  |
| 948 | 1 | 5 | 2.100000  | -4.372521161 | 2.727049911  | 17.517161151  | 1 | 0 | 0 | # | st  |
| 949 | 1 | 5 | 2.100000  | -1.784127332 | 2.723397425  | -12.059455955 | 1 | 0 | 0 | # | st  |
| 950 | 1 | 5 | 2.100000  | -3.378381255 | -2.634695815 | -11.927421788 | 1 | 0 | 0 | # | st  |
| 951 | 1 | 1 | 1.575000  | -2.597848102 | 0.057857326  | -2.106452507  | 1 | 0 | 0 | # | ao  |
| 952 | 1 | 1 | 1.575000  | -0.010708114 | 0.047832665  | -6.329552507  | 1 | 0 | 0 | # | ao  |
| 953 | 1 | 1 | 1.575000  | -5.152324157 | 0.041014554  | -0.757989037  | 1 | 0 | 0 | # | ao  |
| 954 | 1 | 1 | 1.575000  | -2.565320700 | 0.031026926  | -4.981097695  | 1 | 0 | 0 | # | ao  |
| 955 | 1 | 2 | 0.425000  | -2.046444145 | 1.425163371  | -6.987748987  | 1 | 0 | 0 | # | ho  |
| 956 | 1 | 2 | 0.425000  | -4.616877472 | 1.523504153  | -2.718287538  | 1 | 0 | 0 | # | ho  |
| 957 | 1 | 2 | 0.425000  | -0.545135677 | -1.430790090 | -4.366998978  | 1 | 0 | 0 | # | ho  |
| 958 | 1 | 2 | 0.425000  | -3.116732585 | -1.336757339 | -10.100174810 | 1 | 0 | 0 | # | ho  |
| 959 | 1 | 3 | -1.050000 | -3.188479233 | -1.017449350 | -3.540819251  | 1 | 0 | 0 | # | ob  |
| 960 | 1 | 3 | -1.050000 | -3.573516052 | -1.009534011 | -6.225770135  | 1 | 0 | 0 | # | ob  |
| 961 | 1 | 3 | -1.050000 | -0.999979590 | -1.002235530 | -1.992022885  | 1 | 0 | 0 | # | ob  |
| 962 | 1 | 3 | -1.050000 | -2.943049550 | -3.254329459 | -4.913787416  | 1 | 0 | 0 | # | ob  |
| 963 | 1 | 3 | -1.050000 | -0.358456058 | -3.253528090 | -0.694848299  | 1 | 0 | 0 | # | ob  |
| 964 | 1 | 3 | -1.050000 | -4.556194217 | 1.108160884  | -7.769166009  | 1 | 0 | 0 | # | ob  |
| 965 | 1 | 3 | -1.050000 | -1.974624505 | 1.106315515  | -3.546748257  | 1 | 0 | 0 | # | ob  |
| 966 | 1 | 3 | -1.050000 | -2.807274866 | 3.339943172  | -4.722452555  | 1 | 0 | 0 | # | ob  |
| 967 | 1 | 3 | -1.050000 | -0.233857334 | 3.343459909  | -0.494130207  | 1 | 0 | 0 | # | ob  |
| 968 | 1 | 3 | -1.050000 | -4.804200490 | 3.342745271  | -6.392656438  | 1 | 0 | 0 | # | ob  |
| 969 | 1 | 3 | -1.050000 | -2.219640482 | 3.343022387  | -2.173899070  | 1 | 0 | 0 | # | ob  |
| 970 | 1 | 4 | -0.950000 | -4.188982553 | 1.030057382  | -1.993288188  | 1 | 0 | 0 | # | oh  |
| 971 | 1 | 4 | -0.950000 | -1.603729560 | 1.017364731  | -6.220340000  | 1 | 0 | 0 | # | oh  |
| 972 | 1 | 3 | -1.050000 | -2.793809054 | 3.066493209  | -8.032003882  | 1 | 0 | 0 | # | ob  |
| 973 | 1 | 3 | -1.050000 | -0.199524007 | 3.050340270  | -3.800661108  | 1 | 0 | 0 | # | ob  |
| 974 | 1 | 4 | -0.950000 | -3.559434277 | -0.928489933 | -0.867370730  | 1 | 0 | 0 | # | oh  |
| 975 | 1 | 3 | -1.050000 | -4.962848515 | -2.961853389 | -3.286683302  | 1 | 0 | 0 | # | ob  |

|      |   |   |           |              |              |               |   |   |   |   |     |
|------|---|---|-----------|--------------|--------------|---------------|---|---|---|---|-----|
| 976  | 1 | 4 | -0.950000 | -0.973823532 | -0.940763219 | -5.093840393  | 1 | 0 | 0 | # | oh  |
| 977  | 1 | 3 | -1.050000 | -2.369130266 | -2.977677046 | -7.505235566  | 1 | 0 | 0 | # | ob  |
| 978  | 1 | 3 | -1.050000 | -4.162862728 | 1.091158613  | -5.095757222  | 1 | 0 | 0 | # | ob  |
| 979  | 1 | 3 | -1.050000 | -1.589314866 | 1.098365238  | -0.861724339  | 1 | 0 | 0 | # | ob  |
| 980  | 1 | 3 | -1.050000 | -0.606962377 | -1.019123292 | -7.767860028  | 1 | 0 | 0 | # | ob  |
| 981  | 1 | 3 | -1.050000 | -4.929065415 | -3.254366293 | -6.593423632  | 1 | 0 | 0 | # | ob  |
| 982  | 1 | 3 | -1.050000 | -2.355112729 | -3.251063569 | -2.365242275  | 1 | 0 | 0 | # | ob  |
| 983  | 1 | 5 | 2.100000  | -4.285796523 | 2.720599038  | -4.997113478  | 1 | 0 | 0 | # | st  |
| 984  | 1 | 5 | 2.100000  | -1.713770783 | 2.729580341  | -0.769220449  | 1 | 0 | 0 | # | st  |
| 985  | 1 | 5 | 2.100000  | -0.790423949 | -2.638063392 | -7.705525016  | 1 | 0 | 0 | # | st  |
| 986  | 1 | 5 | 2.100000  | -3.449066039 | -2.640760033 | -6.318321646  | 1 | 0 | 0 | # | st  |
| 987  | 1 | 5 | 2.100000  | -0.876649750 | -2.631682580 | -2.090575727  | 1 | 0 | 0 | # | st  |
| 988  | 1 | 5 | 2.100000  | -4.372521161 | 2.727049911  | -7.831638849  | 1 | 0 | 0 | # | st  |
| 989  | 1 | 5 | 2.100000  | -1.784127332 | 2.723397425  | -3.609855955  | 1 | 0 | 0 | # | st  |
| 990  | 1 | 5 | 2.100000  | -3.378381255 | -2.634695815 | -3.477821788  | 1 | 0 | 0 | # | st  |
| 991  | 1 | 6 | -0.950000 | -0.316748817 | -2.634071151 | 16.634714390  | 1 | 0 | 0 | # | oht |
| 992  | 1 | 6 | -0.950000 | -4.572593535 | 2.961484659  | -15.319631379 | 1 | 0 | 0 | # | oht |
| 993  | 1 | 2 | 0.425000  | -4.732836833 | 3.078655077  | -16.411736324 | 1 | 0 | 0 | # | ho  |
| 994  | 1 | 2 | 0.425000  | -0.152010057 | -2.983958974 | -18.650841835 | 1 | 0 | 0 | # | ho  |
| 995  | 1 | 2 | 0.425000  | -4.727361041 | 3.250098365  | 20.059598264  | 1 | 0 | 0 | # | ho  |
| 996  | 1 | 2 | 0.425000  | -0.704966564 | -2.533686233 | 17.669755394  | 1 | 0 | 0 | # | ho  |
| 997  | 1 | 1 | 1.575000  | 2.564951898  | 9.441957326  | 6.343147493   | 0 | 0 | 0 | # | ao  |
| 998  | 1 | 1 | 1.575000  | 5.152091886  | 9.431932665  | 2.120047493   | 0 | 0 | 0 | # | ao  |
| 999  | 1 | 1 | 1.575000  | 0.010475843  | 9.425114554  | 7.691610963   | 0 | 0 | 0 | # | ao  |
| 1000 | 1 | 1 | 1.575000  | 2.597479300  | 9.415126926  | 3.468502305   | 0 | 0 | 0 | # | ao  |
| 1001 | 1 | 2 | 0.425000  | 3.116355855  | 10.809263371 | 1.461851013   | 0 | 0 | 0 | # | ho  |
| 1002 | 1 | 2 | 0.425000  | 0.545922528  | 10.907604153 | 5.731312462   | 0 | 0 | 0 | # | ho  |
| 1003 | 1 | 2 | 0.425000  | 4.617664323  | 7.953309910  | 4.082601022   | 0 | 0 | 0 | # | ho  |
| 1004 | 1 | 2 | 0.425000  | 2.046067415  | 8.047342661  | 8.349425190   | 0 | 0 | 0 | # | ho  |
| 1005 | 1 | 3 | -1.050000 | 1.974320767  | 8.366650650  | 4.908780749   | 0 | 0 | 0 | # | ob  |
| 1006 | 1 | 3 | -1.050000 | 1.589283948  | 8.374565989  | 2.223829865   | 0 | 0 | 0 | # | ob  |
| 1007 | 1 | 3 | -1.050000 | 4.162820410  | 8.381864470  | 6.457577115   | 0 | 0 | 0 | # | ob  |
| 1008 | 1 | 3 | -1.050000 | 2.219750450  | 6.129770541  | 3.535812584   | 0 | 0 | 0 | # | ob  |
| 1009 | 1 | 3 | -1.050000 | 4.804343942  | 6.130571910  | 7.754751701   | 0 | 0 | 0 | # | ob  |
| 1010 | 1 | 3 | -1.050000 | 0.606605783  | 10.492260884 | 0.680433991   | 0 | 0 | 0 | # | ob  |
| 1011 | 1 | 3 | -1.050000 | 3.188175495  | 10.490415515 | 4.902851743   | 0 | 0 | 0 | # | ob  |
| 1012 | 1 | 3 | -1.050000 | 2.355525134  | 12.724043172 | 3.727147445   | 0 | 0 | 0 | # | ob  |
| 1013 | 1 | 3 | -1.050000 | 4.928942666  | 12.727559909 | 7.955469793   | 0 | 0 | 0 | # | ob  |
| 1014 | 1 | 3 | -1.050000 | 0.358599510  | 12.726845271 | 2.056943562   | 0 | 0 | 0 | # | ob  |
| 1015 | 1 | 3 | -1.050000 | 2.943159518  | 12.727122387 | 6.275700930   | 0 | 0 | 0 | # | ob  |
| 1016 | 1 | 4 | -0.950000 | 0.973817447  | 10.414157382 | 6.456311812   | 0 | 0 | 0 | # | oh  |
| 1017 | 1 | 4 | -0.950000 | 3.559070440  | 10.401464731 | 2.229260000   | 0 | 0 | 0 | # | oh  |
| 1018 | 1 | 3 | -1.050000 | 2.368990946  | 12.450593209 | 0.417596118   | 0 | 0 | 0 | # | ob  |
| 1019 | 1 | 3 | -1.050000 | 4.963275993  | 12.434440270 | 4.648938892   | 0 | 0 | 0 | # | ob  |
| 1020 | 1 | 4 | -0.950000 | 1.603365723  | 8.455610067  | 7.582229270   | 0 | 0 | 0 | # | oh  |
| 1021 | 1 | 3 | -1.050000 | 0.199951485  | 6.422246611  | 5.162916698   | 0 | 0 | 0 | # | ob  |
| 1022 | 1 | 4 | -0.950000 | 4.188976468  | 8.443336781  | 3.355759607   | 0 | 0 | 0 | # | oh  |
| 1023 | 1 | 3 | -1.050000 | 2.793669734  | 6.406422954  | 0.944364434   | 0 | 0 | 0 | # | ob  |
| 1024 | 1 | 3 | -1.050000 | 0.999937272  | 10.475258613 | 3.353842278   | 0 | 0 | 0 | # | ob  |
| 1025 | 1 | 3 | -1.050000 | 3.573485134  | 10.482465238 | 7.587875661   | 0 | 0 | 0 | # | ob  |
| 1026 | 1 | 3 | -1.050000 | 4.555837623  | 8.364976708  | 0.681739972   | 0 | 0 | 0 | # | ob  |
| 1027 | 1 | 3 | -1.050000 | 0.233734585  | 6.129733707  | 1.856176368   | 0 | 0 | 0 | # | ob  |
| 1028 | 1 | 3 | -1.050000 | 2.807687271  | 6.133036431  | 6.084357725   | 0 | 0 | 0 | # | ob  |
| 1029 | 1 | 5 | 2.100000  | 0.877003477  | 12.104699038 | 3.452486522   | 0 | 0 | 0 | # | st  |
| 1030 | 1 | 5 | 2.100000  | 3.449029217  | 12.113680341 | 7.680379551   | 0 | 0 | 0 | # | st  |
| 1031 | 1 | 5 | 2.100000  | 4.372376051  | 6.746036608  | 0.744074984   | 0 | 0 | 0 | # | st  |
| 1032 | 1 | 5 | 2.100000  | 1.713733961  | 6.743339967  | 2.131278354   | 0 | 0 | 0 | # | st  |
| 1033 | 1 | 5 | 2.100000  | 4.286150250  | 6.752417420  | 6.359024273   | 0 | 0 | 0 | # | st  |
| 1034 | 1 | 5 | 2.100000  | 0.790278839  | 12.111149911 | 0.617961151   | 0 | 0 | 0 | # | st  |
| 1035 | 1 | 5 | 2.100000  | 3.378672668  | 12.107497425 | 4.839744045   | 0 | 0 | 0 | # | st  |
| 1036 | 1 | 5 | 2.100000  | 1.784418745  | 6.749404185  | 4.971778212   | 0 | 0 | 0 | # | st  |
| 1037 | 1 | 1 | 1.575000  | 2.564951898  | 9.441957326  | 14.792747493  | 0 | 0 | 0 | # | ao  |
| 1038 | 1 | 1 | 1.575000  | 5.152091886  | 9.431932665  | 10.569647493  | 0 | 0 | 0 | # | ao  |
| 1039 | 1 | 1 | 1.575000  | 0.010475843  | 9.425114554  | 16.141210963  | 0 | 0 | 0 | # | ao  |
| 1040 | 1 | 1 | 1.575000  | 2.597479300  | 9.415126926  | 11.918102305  | 0 | 0 | 0 | # | ao  |
| 1041 | 1 | 2 | 0.425000  | 3.116355855  | 10.809263371 | 9.911451013   | 0 | 0 | 0 | # | ho  |
| 1042 | 1 | 2 | 0.425000  | 0.545922528  | 10.907604153 | 14.180912462  | 0 | 0 | 0 | # | ho  |
| 1043 | 1 | 2 | 0.425000  | 4.617664323  | 7.953309910  | 12.532201022  | 0 | 0 | 0 | # | ho  |
| 1044 | 1 | 2 | 0.425000  | 2.046067415  | 8.047342661  | 16.799025190  | 0 | 0 | 0 | # | ho  |
| 1045 | 1 | 3 | -1.050000 | 1.974320767  | 8.366650650  | 13.358380749  | 0 | 0 | 0 | # | ob  |
| 1046 | 1 | 3 | -1.050000 | 1.589283948  | 8.374565989  | 10.673429865  | 0 | 0 | 0 | # | ob  |
| 1047 | 1 | 3 | -1.050000 | 4.162820410  | 8.381864470  | 14.907177115  | 0 | 0 | 0 | # | ob  |
| 1048 | 1 | 3 | -1.050000 | 2.219750450  | 6.129770541  | 11.985412584  | 0 | 0 | 0 | # | ob  |
| 1049 | 1 | 6 | -0.950000 | 4.804343942  | 6.130571910  | -17.594048299 | 0 | 0 | 0 | # | oht |
| 1050 | 1 | 3 | -1.050000 | 0.606605783  | 10.492260884 | 9.130033991   | 0 | 0 | 0 | # | ob  |
| 1051 | 1 | 3 | -1.050000 | 3.188175495  | 10.490415515 | 13.352451743  | 0 | 0 | 0 | # | ob  |
| 1052 | 1 | 3 | -1.050000 | 2.355525134  | 12.724043172 | 12.176747445  | 0 | 0 | 0 | # | ob  |
| 1053 | 1 | 3 | -1.050000 | 4.928942666  | 12.727559909 | 16.405069793  | 0 | 0 | 0 | # | ob  |
| 1054 | 1 | 3 | -1.050000 | 0.358599510  | 12.726845271 | 10.506543562  | 0 | 0 | 0 | # | ob  |
| 1055 | 1 | 3 | -1.050000 | 2.943159518  | 12.727122387 | 14.725300930  | 0 | 0 | 0 | # | ob  |
| 1056 | 1 | 4 | -0.950000 | 0.973817447  | 10.414157382 | 14.905911812  | 0 | 0 | 0 | # | oh  |
| 1057 | 1 | 4 | -0.950000 | 3.559070440  | 10.401464731 | 10.678860000  | 0 | 0 | 0 | # | oh  |
| 1058 | 1 | 3 | -1.050000 | 2.368990946  | 12.450593209 | 8.867196118   | 0 | 0 | 0 | # | ob  |
| 1059 | 1 | 3 | -1.050000 | 4.963275993  | 12.434440270 | 13.098538892  | 0 | 0 | 0 | # | ob  |
| 1060 | 1 | 7 | -0.950000 | 1.603365723  | 8.455610067  | 16.031829270  | 0 | 0 | 0 | # | oho |
| 1061 | 1 | 3 | -1.050000 | 0.199951485  | 6.422246611  | 13.612516698  | 0 | 0 | 0 | # | ob  |
| 1062 | 1 | 4 | -0.950000 | 4.188976468  | 8.443336781  | 11.805359607  | 0 | 0 | 0 | # | oh  |
| 1063 | 1 | 3 | -1.050000 | 2.793669734  | 6.406422954  | 9.393964434   | 0 | 0 | 0 | # | ob  |
| 1064 | 1 | 3 | -1.050000 | 0.999937272  | 10.475258613 | 11.803442278  | 0 | 0 | 0 | # | ob  |
| 1065 | 1 | 3 | -1.050000 | 3.573485134  | 10.482465238 | 16.037475661  | 0 | 0 | 0 | # | ob  |
| 1066 | 1 | 3 | -1.050000 | 4.555837623  | 8.364976708  | 9.131339972   | 0 | 0 | 0 | # | ob  |
| 1067 | 1 | 3 | -1.050000 | 0.233734585  | 6.129733707  | 10.305776368  | 0 | 0 | 0 | # | ob  |
| 1068 | 1 | 3 | -1.050000 | 2.807687271  | 6.133036431  | 14.533957725  | 0 | 0 | 0 | # | ob  |

|      |   |   |           |             |              |               |   |   |   |   |     |
|------|---|---|-----------|-------------|--------------|---------------|---|---|---|---|-----|
| 1069 | 1 | 5 | 2.100000  | 0.877003477 | 12.104699038 | 11.902086522  | 0 | 0 | 0 | # | st  |
| 1070 | 1 | 5 | 2.100000  | 3.449029217 | 12.113680341 | 16.129979551  | 0 | 0 | 0 | # | st  |
| 1071 | 1 | 5 | 2.100000  | 4.372376051 | 6.746036608  | 9.193674984   | 0 | 0 | 0 | # | st  |
| 1072 | 1 | 5 | 2.100000  | 1.713733961 | 6.743339967  | 10.580878354  | 0 | 0 | 0 | # | st  |
| 1073 | 1 | 5 | 2.100000  | 4.286150250 | 6.752417420  | 14.808624273  | 0 | 0 | 0 | # | st  |
| 1074 | 1 | 5 | 2.100000  | 0.790278839 | 12.111149911 | 9.067561151   | 0 | 0 | 0 | # | st  |
| 1075 | 1 | 5 | 2.100000  | 3.378672668 | 12.107497425 | 13.289344045  | 0 | 0 | 0 | # | st  |
| 1076 | 1 | 5 | 2.100000  | 1.784418745 | 6.749404185  | 13.421378212  | 0 | 0 | 0 | # | st  |
| 1077 | 1 | 1 | 1.575000  | 2.564951898 | 9.441957326  | -10.556052507 | 0 | 0 | 0 | # | ao  |
| 1078 | 1 | 1 | 1.575000  | 5.152091886 | 9.431932665  | -14.779152507 | 0 | 0 | 0 | # | ao  |
| 1079 | 1 | 1 | 1.575000  | 0.010475843 | 9.425114554  | -9.207589037  | 0 | 0 | 0 | # | ao  |
| 1080 | 1 | 1 | 1.575000  | 2.597479300 | 9.415126926  | -13.430697695 | 0 | 0 | 0 | # | ao  |
| 1081 | 1 | 2 | 0.425000  | 3.116355855 | 10.809263371 | -15.437348987 | 0 | 0 | 0 | # | ho  |
| 1082 | 1 | 2 | 0.425000  | 0.545922528 | 10.907604153 | -11.167887538 | 0 | 0 | 0 | # | ho  |
| 1083 | 1 | 2 | 0.425000  | 4.617664323 | 7.953309910  | -12.816598978 | 0 | 0 | 0 | # | ho  |
| 1084 | 1 | 2 | 0.425000  | 2.046067415 | 8.047342661  | -8.549774810  | 0 | 0 | 0 | # | ho  |
| 1085 | 1 | 3 | -1.050000 | 1.974320767 | 8.366650650  | -11.990419251 | 0 | 0 | 0 | # | ob  |
| 1086 | 1 | 3 | -1.050000 | 1.589283948 | 8.374565989  | -14.675370135 | 0 | 0 | 0 | # | ob  |
| 1087 | 1 | 3 | -1.050000 | 4.162820410 | 8.381864470  | -10.441622885 | 0 | 0 | 0 | # | ob  |
| 1088 | 1 | 3 | -1.050000 | 2.219750450 | 6.129770541  | -13.363387416 | 0 | 0 | 0 | # | ob  |
| 1089 | 1 | 3 | -1.050000 | 4.804343942 | 6.130571910  | -9.144448299  | 0 | 0 | 0 | # | ob  |
| 1090 | 1 | 3 | -1.050000 | 0.606605783 | 10.492260884 | 17.579633991  | 0 | 0 | 0 | # | ob  |
| 1091 | 1 | 3 | -1.050000 | 3.188175495 | 10.490415515 | -11.996348257 | 0 | 0 | 0 | # | ob  |
| 1092 | 1 | 3 | -1.050000 | 2.355525134 | 12.724043172 | -13.172052555 | 0 | 0 | 0 | # | ob  |
| 1093 | 1 | 3 | -1.050000 | 4.928942666 | 12.727559909 | -8.943730207  | 0 | 0 | 0 | # | ob  |
| 1094 | 1 | 6 | -0.950000 | 0.358599510 | 12.726845271 | 18.956143562  | 0 | 0 | 0 | # | oht |
| 1095 | 1 | 3 | -1.050000 | 2.943159518 | 12.727122387 | -10.623499070 | 0 | 0 | 0 | # | ob  |
| 1096 | 1 | 4 | -0.950000 | 0.973817447 | 10.414157382 | -10.442888188 | 0 | 0 | 0 | # | oh  |
| 1097 | 1 | 7 | -0.950000 | 3.559070440 | 10.401464731 | -14.669940000 | 0 | 0 | 0 | # | oho |
| 1098 | 1 | 3 | -1.050000 | 2.368990946 | 12.450593209 | 17.316796118  | 0 | 0 | 0 | # | ob  |
| 1099 | 1 | 3 | -1.050000 | 4.963275993 | 12.434440270 | -12.250261108 | 0 | 0 | 0 | # | ob  |
| 1100 | 1 | 4 | -0.950000 | 1.603365723 | 8.455610067  | -9.316970730  | 0 | 0 | 0 | # | oh  |
| 1101 | 1 | 3 | -1.050000 | 0.199951485 | 6.422246611  | -11.736283302 | 0 | 0 | 0 | # | ob  |
| 1102 | 1 | 4 | -0.950000 | 4.188976468 | 8.443336781  | -13.54440393  | 0 | 0 | 0 | # | oh  |
| 1103 | 1 | 3 | -1.050000 | 2.793669734 | 6.406422954  | -15.954835566 | 0 | 0 | 0 | # | ob  |
| 1104 | 1 | 3 | -1.050000 | 0.999937272 | 10.475258613 | -13.545357722 | 0 | 0 | 0 | # | ob  |
| 1105 | 1 | 3 | -1.050000 | 3.573485134 | 10.482465238 | -9.311324339  | 0 | 0 | 0 | # | ob  |
| 1106 | 1 | 3 | -1.050000 | 4.555837623 | 8.364976708  | -16.217460028 | 0 | 0 | 0 | # | ob  |
| 1107 | 1 | 3 | -1.050000 | 0.233734585 | 6.129733707  | -15.043023632 | 0 | 0 | 0 | # | ob  |
| 1108 | 1 | 3 | -1.050000 | 2.807687271 | 6.133036431  | -10.814842275 | 0 | 0 | 0 | # | ob  |
| 1109 | 1 | 5 | 2.100000  | 0.877003477 | 12.104699038 | -13.446713478 | 0 | 0 | 0 | # | st  |
| 1110 | 1 | 5 | 2.100000  | 3.449029217 | 12.113680341 | -9.218820449  | 0 | 0 | 0 | # | st  |
| 1111 | 1 | 5 | 2.100000  | 4.372376051 | 6.746036608  | -16.155125016 | 0 | 0 | 0 | # | st  |
| 1112 | 1 | 5 | 2.100000  | 1.713733961 | 6.743339967  | -14.767921646 | 0 | 0 | 0 | # | st  |
| 1113 | 1 | 5 | 2.100000  | 4.286150250 | 6.752417420  | -10.540175727 | 0 | 0 | 0 | # | st  |
| 1114 | 1 | 5 | 2.100000  | 0.790278839 | 12.111149911 | 17.517161151  | 0 | 0 | 0 | # | st  |
| 1115 | 1 | 5 | 2.100000  | 3.378672668 | 12.107497425 | -12.059455955 | 0 | 0 | 0 | # | st  |
| 1116 | 1 | 5 | 2.100000  | 1.784418745 | 6.749404185  | -11.927421788 | 0 | 0 | 0 | # | st  |
| 1117 | 1 | 1 | 1.575000  | 2.564951898 | 9.441957326  | -2.106452507  | 0 | 0 | 0 | # | ao  |
| 1118 | 1 | 1 | 1.575000  | 5.152091886 | 9.431932665  | -6.329552507  | 0 | 0 | 0 | # | ao  |
| 1119 | 1 | 1 | 1.575000  | 0.010475843 | 9.425114554  | -0.757989037  | 0 | 0 | 0 | # | ao  |
| 1120 | 1 | 1 | 1.575000  | 2.597479300 | 9.415126926  | -4.981097695  | 0 | 0 | 0 | # | ao  |
| 1121 | 1 | 2 | 0.425000  | 3.116355855 | 10.809263371 | -6.987748987  | 0 | 0 | 0 | # | ho  |
| 1122 | 1 | 2 | 0.425000  | 0.545922528 | 10.907604153 | -2.718287538  | 0 | 0 | 0 | # | ho  |
| 1123 | 1 | 2 | 0.425000  | 4.617664323 | 7.953309910  | -4.366998978  | 0 | 0 | 0 | # | ho  |
| 1124 | 1 | 2 | 0.425000  | 2.046067415 | 8.047342661  | -0.100174810  | 0 | 0 | 0 | # | ho  |
| 1125 | 1 | 3 | -1.050000 | 1.974320767 | 8.366650650  | -3.540819251  | 0 | 0 | 0 | # | ob  |
| 1126 | 1 | 3 | -1.050000 | 1.589283948 | 8.374565989  | -6.225770135  | 0 | 0 | 0 | # | ob  |
| 1127 | 1 | 3 | -1.050000 | 4.162820410 | 8.381864470  | -1.992022885  | 0 | 0 | 0 | # | ob  |
| 1128 | 1 | 3 | -1.050000 | 2.219750450 | 6.129770541  | -4.913787416  | 0 | 0 | 0 | # | ob  |
| 1129 | 1 | 3 | -1.050000 | 4.804343942 | 6.130571910  | -0.694848299  | 0 | 0 | 0 | # | ob  |
| 1130 | 1 | 3 | -1.050000 | 0.606605783 | 10.492260884 | -7.769166009  | 0 | 0 | 0 | # | ob  |
| 1131 | 1 | 3 | -1.050000 | 3.188175495 | 10.490415515 | -3.546748257  | 0 | 0 | 0 | # | ob  |
| 1132 | 1 | 3 | -1.050000 | 2.355525134 | 12.724043172 | -4.722452555  | 0 | 0 | 0 | # | ob  |
| 1133 | 1 | 3 | -1.050000 | 4.928942666 | 12.727559909 | -0.494130207  | 0 | 0 | 0 | # | ob  |
| 1134 | 1 | 3 | -1.050000 | 0.358599510 | 12.726845271 | -6.392656438  | 0 | 0 | 0 | # | ob  |
| 1135 | 1 | 3 | -1.050000 | 2.943159518 | 12.727122387 | -2.173899070  | 0 | 0 | 0 | # | ob  |
| 1136 | 1 | 4 | -0.950000 | 0.973817447 | 10.414157382 | -1.993288188  | 0 | 0 | 0 | # | oh  |
| 1137 | 1 | 4 | -0.950000 | 3.559070440 | 10.401464731 | -6.220340000  | 0 | 0 | 0 | # | oh  |
| 1138 | 1 | 3 | -1.050000 | 2.368990946 | 12.450593209 | -8.032003882  | 0 | 0 | 0 | # | ob  |
| 1139 | 1 | 3 | -1.050000 | 4.963275993 | 12.434440270 | -3.800661108  | 0 | 0 | 0 | # | ob  |
| 1140 | 1 | 4 | -0.950000 | 1.603365723 | 8.455610067  | -0.867370730  | 0 | 0 | 0 | # | oh  |
| 1141 | 1 | 3 | -1.050000 | 0.199951485 | 6.422246611  | -3.286683302  | 0 | 0 | 0 | # | ob  |
| 1142 | 1 | 4 | -0.950000 | 4.188976468 | 8.443336781  | -5.093840393  | 0 | 0 | 0 | # | oh  |
| 1143 | 1 | 3 | -1.050000 | 2.793669734 | 6.406422954  | -7.505235566  | 0 | 0 | 0 | # | ob  |
| 1144 | 1 | 3 | -1.050000 | 0.999937272 | 10.475258613 | -5.095757722  | 0 | 0 | 0 | # | ob  |
| 1145 | 1 | 3 | -1.050000 | 3.573485134 | 10.482465238 | -0.861724339  | 0 | 0 | 0 | # | ob  |
| 1146 | 1 | 3 | -1.050000 | 4.555837623 | 8.364976708  | -7.767860028  | 0 | 0 | 0 | # | ob  |
| 1147 | 1 | 3 | -1.050000 | 0.233734585 | 6.129733707  | -6.593423632  | 0 | 0 | 0 | # | ob  |
| 1148 | 1 | 3 | -1.050000 | 2.807687271 | 6.133036431  | -2.365242275  | 0 | 0 | 0 | # | ob  |
| 1149 | 1 | 5 | 2.100000  | 0.877003477 | 12.104699038 | -4.997113478  | 0 | 0 | 0 | # | st  |
| 1150 | 1 | 5 | 2.100000  | 3.449029217 | 12.113680341 | -0.769220449  | 0 | 0 | 0 | # | st  |
| 1151 | 1 | 5 | 2.100000  | 4.372376051 | 6.746036608  | -7.705525016  | 0 | 0 | 0 | # | st  |
| 1152 | 1 | 5 | 2.100000  | 1.713733961 | 6.743339967  | -6.318321646  | 0 | 0 | 0 | # | st  |
| 1153 | 1 | 5 | 2.100000  | 4.286150250 | 6.752417420  | -2.090575727  | 0 | 0 | 0 | # | st  |
| 1154 | 1 | 5 | 2.100000  | 0.790278839 | 12.111149911 | -7.831638849  | 0 | 0 | 0 | # | st  |
| 1155 | 1 | 5 | 2.100000  | 3.378672668 | 12.107497425 | -3.609855955  | 0 | 0 | 0 | # | st  |
| 1156 | 1 | 5 | 2.100000  | 1.784418745 | 6.749404185  | -3.477821788  | 0 | 0 | 0 | # | st  |
| 1157 | 1 | 6 | -0.950000 | 4.846051183 | 6.750028849  | 16.634714390  | 0 | 0 | 0 | # | oht |
| 1158 | 1 | 6 | -0.950000 | 0.590206465 | 12.345584659 | -15.319631379 | 0 | 0 | 0 | # | oht |
| 1159 | 1 | 2 | 0.425000  | 0.429963167 | 12.462755077 | -16.411736324 | 0 | 0 | 0 | # | ho  |
| 1160 | 1 | 2 | 0.425000  | 5.010789943 | 6.400141026  | -18.650841835 | 0 | 0 | 0 | # | ho  |
| 1161 | 1 | 2 | 0.425000  | 0.435438959 | 12.634198365 | 20.059598264  | 0 | 0 | 0 | # | ho  |



|      |   |   |           |              |              |               |   |   |   |   |     |
|------|---|---|-----------|--------------|--------------|---------------|---|---|---|---|-----|
| 1162 | 1 | 2 | 0.425000  | 4.457833436  | 6.850413767  | 17.669755394  | 0 | 0 | 0 | # | ho  |
| 1163 | 1 | 1 | 1.575000  | 7.727751898  | 9.441957326  | 6.343147493   | 0 | 0 | 0 | # | ao  |
| 1164 | 1 | 1 | 1.575000  | 10.314891886 | 9.431932665  | 2.120047493   | 0 | 0 | 0 | # | ao  |
| 1165 | 1 | 1 | 1.575000  | 5.173275843  | 9.425114554  | 7.691610963   | 0 | 0 | 0 | # | ao  |
| 1166 | 1 | 1 | 1.575000  | 7.760279300  | 9.415126926  | 3.468502305   | 0 | 0 | 0 | # | ao  |
| 1167 | 1 | 2 | 0.425000  | 8.279155855  | 10.809263371 | 1.461851013   | 0 | 0 | 0 | # | ho  |
| 1168 | 1 | 2 | 0.425000  | 5.708722528  | 10.907604153 | 5.731312462   | 0 | 0 | 0 | # | ho  |
| 1169 | 1 | 2 | 0.425000  | 9.780464323  | 7.953309910  | 4.082601022   | 0 | 0 | 0 | # | ho  |
| 1170 | 1 | 2 | 0.425000  | 7.208867415  | 8.047342661  | 8.349425190   | 0 | 0 | 0 | # | ho  |
| 1171 | 1 | 3 | -1.050000 | 7.137120767  | 8.366650650  | 4.908780749   | 0 | 0 | 0 | # | ob  |
| 1172 | 1 | 3 | -1.050000 | 6.752083948  | 8.374565989  | 2.223829865   | 0 | 0 | 0 | # | ob  |
| 1173 | 1 | 3 | -1.050000 | 9.325620410  | 8.381864470  | 6.457577115   | 0 | 0 | 0 | # | ob  |
| 1174 | 1 | 3 | -1.050000 | 7.382550450  | 6.129770541  | 3.535812584   | 0 | 0 | 0 | # | ob  |
| 1175 | 1 | 3 | -1.050000 | 9.967143942  | 6.130571910  | 7.754751701   | 0 | 0 | 0 | # | ob  |
| 1176 | 1 | 3 | -1.050000 | 5.769405783  | 10.492260884 | 0.680433991   | 0 | 0 | 0 | # | ob  |
| 1177 | 1 | 3 | -1.050000 | 8.350975495  | 10.490415515 | 4.902851743   | 0 | 0 | 0 | # | ob  |
| 1178 | 1 | 3 | -1.050000 | 7.518325134  | 12.724043172 | 3.727147445   | 0 | 0 | 0 | # | ob  |
| 1179 | 1 | 3 | -1.050000 | 10.091742666 | 12.727559909 | 7.955469793   | 0 | 0 | 0 | # | ob  |
| 1180 | 1 | 3 | -1.050000 | 5.521399510  | 12.726845271 | 2.056943562   | 0 | 0 | 0 | # | ob  |
| 1181 | 1 | 3 | -1.050000 | 8.105959518  | 12.727122387 | 6.275700930   | 0 | 0 | 0 | # | ob  |
| 1182 | 1 | 4 | -0.950000 | 6.136617447  | 10.414157382 | 6.456311812   | 0 | 0 | 0 | # | oh  |
| 1183 | 1 | 4 | -0.950000 | 8.721870440  | 10.401464731 | 2.229260000   | 0 | 0 | 0 | # | oh  |
| 1184 | 1 | 3 | -1.050000 | 7.531790946  | 12.450593209 | 0.417596118   | 0 | 0 | 0 | # | ob  |
| 1185 | 1 | 3 | -1.050000 | 10.126075993 | 12.434440270 | 4.648938892   | 0 | 0 | 0 | # | ob  |
| 1186 | 1 | 4 | -0.950000 | 6.766165723  | 8.455610067  | 7.582229270   | 0 | 0 | 0 | # | oh  |
| 1187 | 1 | 3 | -1.050000 | 5.362751485  | 6.422246611  | 5.162916698   | 0 | 0 | 0 | # | ob  |
| 1188 | 1 | 4 | -0.950000 | 9.351776468  | 8.443336781  | 3.355759607   | 0 | 0 | 0 | # | oh  |
| 1189 | 1 | 3 | -1.050000 | 7.956469734  | 6.406422954  | 0.944364434   | 0 | 0 | 0 | # | ob  |
| 1190 | 1 | 3 | -1.050000 | 6.162737272  | 10.475258613 | 3.353842278   | 0 | 0 | 0 | # | ob  |
| 1191 | 1 | 3 | -1.050000 | 8.736285134  | 10.482465238 | 7.587875661   | 0 | 0 | 0 | # | ob  |
| 1192 | 1 | 3 | -1.050000 | 9.718637623  | 8.364976708  | 0.681739972   | 0 | 0 | 0 | # | ob  |
| 1193 | 1 | 3 | -1.050000 | 5.396534585  | 6.129733707  | 1.856176368   | 0 | 0 | 0 | # | ob  |
| 1194 | 1 | 3 | -1.050000 | 7.970487271  | 6.133036431  | 6.084357725   | 0 | 0 | 0 | # | ob  |
| 1195 | 1 | 5 | 2.100000  | 6.039803477  | 12.104699038 | 3.452486522   | 0 | 0 | 0 | # | st  |
| 1196 | 1 | 5 | 2.100000  | 8.611829217  | 12.113680341 | 7.680379551   | 0 | 0 | 0 | # | st  |
| 1197 | 1 | 5 | 2.100000  | 9.535176051  | 6.746036608  | 0.744074984   | 0 | 0 | 0 | # | st  |
| 1198 | 1 | 5 | 2.100000  | 6.876533961  | 6.743339967  | 2.131278354   | 0 | 0 | 0 | # | st  |
| 1199 | 1 | 5 | 2.100000  | 9.448950250  | 6.752417420  | 6.359024273   | 0 | 0 | 0 | # | st  |
| 1200 | 1 | 5 | 2.100000  | 5.953078839  | 12.111149911 | 0.617961151   | 0 | 0 | 0 | # | st  |
| 1201 | 1 | 5 | 2.100000  | 8.541472668  | 12.107497425 | 4.839744045   | 0 | 0 | 0 | # | st  |
| 1202 | 1 | 5 | 2.100000  | 6.947218745  | 6.749404185  | 4.971778212   | 0 | 0 | 0 | # | st  |
| 1203 | 1 | 1 | 1.575000  | 7.727751898  | 9.441957326  | 14.792747493  | 0 | 0 | 0 | # | ao  |
| 1204 | 1 | 1 | 1.575000  | 10.314891886 | 9.431932665  | 10.569647493  | 0 | 0 | 0 | # | ao  |
| 1205 | 1 | 1 | 1.575000  | 5.173275843  | 9.425114554  | 16.141210963  | 0 | 0 | 0 | # | ao  |
| 1206 | 1 | 1 | 1.575000  | 7.760279300  | 9.415126926  | 11.918102305  | 0 | 0 | 0 | # | ao  |
| 1207 | 1 | 2 | 0.425000  | 8.279155855  | 10.809263371 | 9.911451013   | 0 | 0 | 0 | # | ho  |
| 1208 | 1 | 2 | 0.425000  | 5.708722528  | 10.907604153 | 14.180912462  | 0 | 0 | 0 | # | ho  |
| 1209 | 1 | 2 | 0.425000  | 9.780464323  | 7.953309910  | 12.532201022  | 0 | 0 | 0 | # | ho  |
| 1210 | 1 | 2 | 0.425000  | 7.208867415  | 8.047342661  | 16.799025190  | 0 | 0 | 0 | # | ho  |
| 1211 | 1 | 3 | -1.050000 | 7.137120767  | 8.366650650  | 13.358380749  | 0 | 0 | 0 | # | ob  |
| 1212 | 1 | 3 | -1.050000 | 6.752083948  | 8.374565989  | 10.673429865  | 0 | 0 | 0 | # | ob  |
| 1213 | 1 | 3 | -1.050000 | 9.325620410  | 8.381864470  | 14.907177115  | 0 | 0 | 0 | # | ob  |
| 1214 | 1 | 3 | -1.050000 | 7.382550450  | 6.129770541  | 11.985412584  | 0 | 0 | 0 | # | ob  |
| 1215 | 1 | 6 | -0.950000 | 9.967143942  | 6.130571910  | -17.594048299 | 0 | 0 | 0 | # | oht |
| 1216 | 1 | 3 | -1.050000 | 5.769405783  | 10.492260884 | 9.130033991   | 0 | 0 | 0 | # | ob  |
| 1217 | 1 | 3 | -1.050000 | 8.350975495  | 10.490415515 | 13.352451743  | 0 | 0 | 0 | # | ob  |
| 1218 | 1 | 3 | -1.050000 | 7.518325134  | 12.724043172 | 12.176747445  | 0 | 0 | 0 | # | ob  |
| 1219 | 1 | 3 | -1.050000 | 10.091742666 | 12.727559909 | 16.405069793  | 0 | 0 | 0 | # | ob  |
| 1220 | 1 | 3 | -1.050000 | 5.521399510  | 12.726845271 | 10.506543562  | 0 | 0 | 0 | # | ob  |
| 1221 | 1 | 3 | -1.050000 | 8.105959518  | 12.727122387 | 14.725300930  | 0 | 0 | 0 | # | ob  |
| 1222 | 1 | 4 | -0.950000 | 6.136617447  | 10.414157382 | 14.905911812  | 0 | 0 | 0 | # | oh  |
| 1223 | 1 | 4 | -0.950000 | 8.721870440  | 10.401464731 | 10.678860000  | 0 | 0 | 0 | # | oh  |
| 1224 | 1 | 3 | -1.050000 | 7.531790946  | 12.450593209 | 8.867196118   | 0 | 0 | 0 | # | ob  |
| 1225 | 1 | 3 | -1.050000 | 10.126075993 | 12.434440270 | 13.098538892  | 0 | 0 | 0 | # | ob  |
| 1226 | 1 | 7 | -0.950000 | 6.766165723  | 8.455610067  | 16.031829270  | 0 | 0 | 0 | # | oho |
| 1227 | 1 | 3 | -1.050000 | 5.362751485  | 6.422246611  | 13.612516698  | 0 | 0 | 0 | # | ob  |
| 1228 | 1 | 4 | -0.950000 | 9.351776468  | 8.443336781  | 11.805359607  | 0 | 0 | 0 | # | oh  |
| 1229 | 1 | 3 | -1.050000 | 7.956469734  | 6.406422954  | 9.393964434   | 0 | 0 | 0 | # | ob  |
| 1230 | 1 | 3 | -1.050000 | 6.162737272  | 10.475258613 | 11.803442278  | 0 | 0 | 0 | # | ob  |
| 1231 | 1 | 3 | -1.050000 | 8.736285134  | 10.482465238 | 16.037475661  | 0 | 0 | 0 | # | ob  |
| 1232 | 1 | 3 | -1.050000 | 9.718637623  | 8.364976708  | 9.131339972   | 0 | 0 | 0 | # | ob  |
| 1233 | 1 | 3 | -1.050000 | 5.396534585  | 6.129733707  | 10.305776368  | 0 | 0 | 0 | # | ob  |
| 1234 | 1 | 3 | -1.050000 | 7.970487271  | 6.133036431  | 14.533957725  | 0 | 0 | 0 | # | ob  |
| 1235 | 1 | 5 | 2.100000  | 6.039803477  | 12.104699038 | 11.902086522  | 0 | 0 | 0 | # | st  |
| 1236 | 1 | 5 | 2.100000  | 8.611829217  | 12.113680341 | 16.129979551  | 0 | 0 | 0 | # | st  |
| 1237 | 1 | 5 | 2.100000  | 9.535176051  | 6.746036608  | 9.193674984   | 0 | 0 | 0 | # | st  |
| 1238 | 1 | 5 | 2.100000  | 6.876533961  | 6.743339967  | 10.580878354  | 0 | 0 | 0 | # | st  |
| 1239 | 1 | 5 | 2.100000  | 9.448950250  | 6.752417420  | 14.808624273  | 0 | 0 | 0 | # | st  |
| 1240 | 1 | 5 | 2.100000  | 5.953078839  | 12.111149911 | 9.067561151   | 0 | 0 | 0 | # | st  |
| 1241 | 1 | 5 | 2.100000  | 8.541472668  | 12.107497425 | 13.289344045  | 0 | 0 | 0 | # | st  |
| 1242 | 1 | 5 | 2.100000  | 6.947218745  | 6.749404185  | 13.421378212  | 0 | 0 | 0 | # | st  |
| 1243 | 1 | 1 | 1.575000  | 7.727751898  | 9.441957326  | -10.556052507 | 0 | 0 | 0 | # | ao  |
| 1244 | 1 | 1 | 1.575000  | 10.314891886 | 9.431932665  | -14.779152507 | 0 | 0 | 0 | # | ao  |
| 1245 | 1 | 1 | 1.575000  | 5.173275843  | 9.425114554  | -9.207589037  | 0 | 0 | 0 | # | ao  |
| 1246 | 1 | 1 | 1.575000  | 7.760279300  | 9.415126926  | -13.430697695 | 0 | 0 | 0 | # | ao  |
| 1247 | 1 | 2 | 0.425000  | 8.279155855  | 10.809263371 | -15.437348987 | 0 | 0 | 0 | # | ho  |
| 1248 | 1 | 2 | 0.425000  | 5.708722528  | 10.907604153 | -11.167887538 | 0 | 0 | 0 | # | ho  |
| 1249 | 1 | 2 | 0.425000  | 9.780464323  | 7.953309910  | -12.816598978 | 0 | 0 | 0 | # | ho  |
| 1250 | 1 | 2 | 0.425000  | 7.208867415  | 8.047342661  | -8.549774810  | 0 | 0 | 0 | # | ho  |
| 1251 | 1 | 3 | -1.050000 | 7.137120767  | 8.366650650  | -11.990419251 | 0 | 0 | 0 | # | ob  |
| 1252 | 1 | 3 | -1.050000 | 6.752083948  | 8.374565989  | -14.675370135 | 0 | 0 | 0 | # | ob  |
| 1253 | 1 | 3 | -1.050000 | 9.325620410  | 8.381864470  | -10.441622885 | 0 | 0 | 0 | # | ob  |
| 1254 | 1 | 3 | -1.050000 | 7.382550450  | 6.129770541  | -13.363387416 | 0 | 0 | 0 | # | ob  |

|      |   |   |           |              |              |               |   |   |   |   |     |
|------|---|---|-----------|--------------|--------------|---------------|---|---|---|---|-----|
| 1255 | 1 | 3 | -1.050000 | 9.967143942  | 6.130571910  | -9.144448299  | 0 | 0 | 0 | # | ob  |
| 1256 | 1 | 3 | -1.050000 | 5.769405783  | 10.492260884 | 17.579633991  | 0 | 0 | 0 | # | ob  |
| 1257 | 1 | 3 | -1.050000 | 8.350975495  | 10.490415515 | -11.996348257 | 0 | 0 | 0 | # | ob  |
| 1258 | 1 | 3 | -1.050000 | 7.518325134  | 12.724043172 | -13.172052555 | 0 | 0 | 0 | # | ob  |
| 1259 | 1 | 3 | -1.050000 | 10.091742666 | 12.727559909 | -8.943730207  | 0 | 0 | 0 | # | ob  |
| 1260 | 1 | 6 | -0.950000 | 5.521399510  | 12.726845271 | 18.956143562  | 0 | 0 | 0 | # | oht |
| 1261 | 1 | 3 | -1.050000 | 8.105959518  | 12.727122387 | -10.623499070 | 0 | 0 | 0 | # | ob  |
| 1262 | 1 | 4 | -0.950000 | 6.136617447  | 10.414157382 | -10.442888188 | 0 | 0 | 0 | # | oh  |
| 1263 | 1 | 7 | -0.950000 | 8.721870440  | 10.401464731 | -14.669940000 | 0 | 0 | 0 | # | oho |
| 1264 | 1 | 3 | -1.050000 | 7.531790946  | 12.450593209 | 17.316796118  | 0 | 0 | 0 | # | ob  |
| 1265 | 1 | 3 | -1.050000 | 10.126075993 | 12.434440270 | -12.250261108 | 0 | 0 | 0 | # | ob  |
| 1266 | 1 | 4 | -0.950000 | 6.766165723  | 8.455610067  | -9.316970730  | 0 | 0 | 0 | # | oh  |
| 1267 | 1 | 3 | -1.050000 | 5.362751485  | 6.422246611  | -11.736283302 | 0 | 0 | 0 | # | ob  |
| 1268 | 1 | 4 | -0.950000 | 9.351776468  | 8.443336781  | -13.543440393 | 0 | 0 | 0 | # | oh  |
| 1269 | 1 | 3 | -1.050000 | 7.956469734  | 6.406422954  | -15.954835566 | 0 | 0 | 0 | # | ob  |
| 1270 | 1 | 3 | -1.050000 | 6.162737272  | 10.475258613 | -13.545357722 | 0 | 0 | 0 | # | ob  |
| 1271 | 1 | 3 | -1.050000 | 8.736285134  | 10.482465238 | -9.311324339  | 0 | 0 | 0 | # | ob  |
| 1272 | 1 | 3 | -1.050000 | 9.718637623  | 8.364976708  | -16.217460028 | 0 | 0 | 0 | # | ob  |
| 1273 | 1 | 3 | -1.050000 | 5.396534585  | 6.129733707  | -15.043023632 | 0 | 0 | 0 | # | ob  |
| 1274 | 1 | 3 | -1.050000 | 7.970487271  | 6.133036431  | -10.814842275 | 0 | 0 | 0 | # | ob  |
| 1275 | 1 | 5 | 2.100000  | 6.039803477  | 12.104699038 | -13.446713478 | 0 | 0 | 0 | # | st  |
| 1276 | 1 | 5 | 2.100000  | 8.611829217  | 12.113680341 | -9.218820449  | 0 | 0 | 0 | # | st  |
| 1277 | 1 | 5 | 2.100000  | 9.535176051  | 6.746036608  | -16.155125016 | 0 | 0 | 0 | # | st  |
| 1278 | 1 | 5 | 2.100000  | 6.876533961  | 6.743339967  | -14.767921646 | 0 | 0 | 0 | # | st  |
| 1279 | 1 | 5 | 2.100000  | 9.448950250  | 6.752417420  | -10.540175727 | 0 | 0 | 0 | # | st  |
| 1280 | 1 | 5 | 2.100000  | 5.953078839  | 12.111149911 | 17.517161151  | 0 | 0 | 0 | # | st  |
| 1281 | 1 | 5 | 2.100000  | 8.541472668  | 12.107497425 | -12.059455955 | 0 | 0 | 0 | # | st  |
| 1282 | 1 | 5 | 2.100000  | 6.947218745  | 6.749404185  | -11.927421788 | 0 | 0 | 0 | # | st  |
| 1283 | 1 | 1 | 1.575000  | 7.727751898  | 9.441957326  | -2.106452507  | 0 | 0 | 0 | # | ao  |
| 1284 | 1 | 1 | 1.575000  | 10.314891886 | 9.431932665  | -6.329552507  | 0 | 0 | 0 | # | ao  |
| 1285 | 1 | 1 | 1.575000  | 5.173275843  | 9.425114554  | -0.757989037  | 0 | 0 | 0 | # | ao  |
| 1286 | 1 | 1 | 1.575000  | 7.760279300  | 9.415126926  | -4.981097695  | 0 | 0 | 0 | # | ao  |
| 1287 | 1 | 2 | 0.425000  | 8.279155855  | 10.809263371 | -6.987748987  | 0 | 0 | 0 | # | ho  |
| 1288 | 1 | 2 | 0.425000  | 5.708722528  | 10.907604153 | -2.718287538  | 0 | 0 | 0 | # | ho  |
| 1289 | 1 | 2 | 0.425000  | 9.780464323  | 7.953309910  | -4.366998978  | 0 | 0 | 0 | # | ho  |
| 1290 | 1 | 2 | 0.425000  | 7.208867415  | 8.047342661  | -0.100174810  | 0 | 0 | 0 | # | ho  |
| 1291 | 1 | 3 | -1.050000 | 7.137120767  | 8.366650650  | -3.540819251  | 0 | 0 | 0 | # | ob  |
| 1292 | 1 | 3 | -1.050000 | 6.752083948  | 8.374565989  | -6.225770135  | 0 | 0 | 0 | # | ob  |
| 1293 | 1 | 3 | -1.050000 | 9.325620410  | 8.381864470  | -1.992022885  | 0 | 0 | 0 | # | ob  |
| 1294 | 1 | 3 | -1.050000 | 7.382550450  | 6.129770541  | -4.913787416  | 0 | 0 | 0 | # | ob  |
| 1295 | 1 | 3 | -1.050000 | 9.967143942  | 6.130571910  | -0.694848299  | 0 | 0 | 0 | # | ob  |
| 1296 | 1 | 3 | -1.050000 | 5.769405783  | 10.492260884 | -7.769166009  | 0 | 0 | 0 | # | ob  |
| 1297 | 1 | 3 | -1.050000 | 8.350975495  | 10.490415515 | -3.546748257  | 0 | 0 | 0 | # | ob  |
| 1298 | 1 | 3 | -1.050000 | 7.518325134  | 12.724043172 | -4.722452555  | 0 | 0 | 0 | # | ob  |
| 1299 | 1 | 3 | -1.050000 | 10.091742666 | 12.727559909 | -0.494130207  | 0 | 0 | 0 | # | ob  |
| 1300 | 1 | 3 | -1.050000 | 5.521399510  | 12.726845271 | -6.392656438  | 0 | 0 | 0 | # | ob  |
| 1301 | 1 | 3 | -1.050000 | 8.105959518  | 12.727122387 | -2.173899070  | 0 | 0 | 0 | # | ob  |
| 1302 | 1 | 4 | -0.950000 | 6.136617447  | 10.414157382 | -1.993288188  | 0 | 0 | 0 | # | oh  |
| 1303 | 1 | 4 | -0.950000 | 8.721870440  | 10.401464731 | -6.220340000  | 0 | 0 | 0 | # | oh  |
| 1304 | 1 | 3 | -1.050000 | 7.531790946  | 12.450593209 | -8.032003882  | 0 | 0 | 0 | # | ob  |
| 1305 | 1 | 3 | -1.050000 | 10.126075993 | 12.434440270 | -3.800661108  | 0 | 0 | 0 | # | ob  |
| 1306 | 1 | 4 | -0.950000 | 6.766165723  | 8.455610067  | -0.867370730  | 0 | 0 | 0 | # | oh  |
| 1307 | 1 | 3 | -1.050000 | 5.362751485  | 6.422246611  | -3.286683302  | 0 | 0 | 0 | # | ob  |
| 1308 | 1 | 4 | -0.950000 | 9.351776468  | 8.443336781  | -5.093840393  | 0 | 0 | 0 | # | oh  |
| 1309 | 1 | 3 | -1.050000 | 7.956469734  | 6.406422954  | -7.505235566  | 0 | 0 | 0 | # | ob  |
| 1310 | 1 | 3 | -1.050000 | 6.162737272  | 10.475258613 | -5.095757722  | 0 | 0 | 0 | # | ob  |
| 1311 | 1 | 3 | -1.050000 | 8.736285134  | 10.482465238 | -0.861724339  | 0 | 0 | 0 | # | ob  |
| 1312 | 1 | 3 | -1.050000 | 9.718637623  | 8.364976708  | -7.767860028  | 0 | 0 | 0 | # | ob  |
| 1313 | 1 | 3 | -1.050000 | 5.396534585  | 6.129733707  | -6.593423632  | 0 | 0 | 0 | # | ob  |
| 1314 | 1 | 3 | -1.050000 | 7.970487271  | 6.133036431  | -2.365242275  | 0 | 0 | 0 | # | ob  |
| 1315 | 1 | 5 | 2.100000  | 6.039803477  | 12.104699038 | -4.997113478  | 0 | 0 | 0 | # | st  |
| 1316 | 1 | 5 | 2.100000  | 8.611829217  | 12.113680341 | -0.769220449  | 0 | 0 | 0 | # | st  |
| 1317 | 1 | 5 | 2.100000  | 9.535176051  | 6.746036608  | -7.705525016  | 0 | 0 | 0 | # | st  |
| 1318 | 1 | 5 | 2.100000  | 6.876533961  | 6.743339967  | -6.318321646  | 0 | 0 | 0 | # | st  |
| 1319 | 1 | 5 | 2.100000  | 9.448950250  | 6.752417420  | -2.090575727  | 0 | 0 | 0 | # | st  |
| 1320 | 1 | 5 | 2.100000  | 5.953078839  | 12.111149911 | -7.831638849  | 0 | 0 | 0 | # | st  |
| 1321 | 1 | 5 | 2.100000  | 8.541472668  | 12.107497425 | -3.609855955  | 0 | 0 | 0 | # | st  |
| 1322 | 1 | 5 | 2.100000  | 6.947218745  | 6.749404185  | -3.477821788  | 0 | 0 | 0 | # | st  |
| 1323 | 1 | 6 | -0.950000 | 10.008851183 | 6.750028849  | 16.634714390  | 0 | 0 | 0 | # | oht |
| 1324 | 1 | 6 | -0.950000 | 5.753006465  | 12.345584659 | -15.319631379 | 0 | 0 | 0 | # | oht |
| 1325 | 1 | 2 | 0.425000  | 5.592763167  | 12.462755077 | -16.411736324 | 0 | 0 | 0 | # | ho  |
| 1326 | 1 | 2 | 0.425000  | 10.173589943 | 6.400141026  | -18.650841835 | 0 | 0 | 0 | # | ho  |
| 1327 | 1 | 2 | 0.425000  | 5.598238959  | 12.634198365 | 20.059598264  | 0 | 0 | 0 | # | ho  |
| 1328 | 1 | 2 | 0.425000  | 9.620633436  | 6.850413767  | 17.669755394  | 0 | 0 | 0 | # | ho  |
| 1329 | 1 | 1 | 1.575000  | 12.890551898 | 9.441957326  | 6.343147493   | 0 | 0 | 0 | # | ao  |
| 1330 | 1 | 1 | 1.575000  | 15.477691886 | 9.431932665  | 2.120047493   | 0 | 0 | 0 | # | ao  |
| 1331 | 1 | 1 | 1.575000  | 10.336075843 | 9.425114554  | 7.691610963   | 0 | 0 | 0 | # | ao  |
| 1332 | 1 | 1 | 1.575000  | 12.923079300 | 9.415126926  | 3.468502305   | 0 | 0 | 0 | # | ao  |
| 1333 | 1 | 2 | 0.425000  | 13.441955855 | 10.809263371 | 1.461851013   | 0 | 0 | 0 | # | ho  |
| 1334 | 1 | 2 | 0.425000  | 10.871522528 | 10.907604153 | 5.731312462   | 0 | 0 | 0 | # | ho  |
| 1335 | 1 | 2 | 0.425000  | 14.943264323 | 7.953309910  | 4.082601022   | 0 | 0 | 0 | # | ho  |
| 1336 | 1 | 2 | 0.425000  | 12.371667415 | 8.047342661  | 8.349425190   | 0 | 0 | 0 | # | ho  |
| 1337 | 1 | 3 | -1.050000 | 12.299920767 | 8.366650650  | 4.908780749   | 0 | 0 | 0 | # | ob  |
| 1338 | 1 | 3 | -1.050000 | 11.914883948 | 8.374565989  | 2.223829865   | 0 | 0 | 0 | # | ob  |
| 1339 | 1 | 3 | -1.050000 | 14.488420410 | 8.381864470  | 6.457577115   | 0 | 0 | 0 | # | ob  |
| 1340 | 1 | 3 | -1.050000 | 12.545350450 | 6.129770541  | 3.535812584   | 0 | 0 | 0 | # | ob  |
| 1341 | 1 | 3 | -1.050000 | 15.129943942 | 6.130571910  | 7.754751701   | 0 | 0 | 0 | # | ob  |
| 1342 | 1 | 3 | -1.050000 | 10.932205783 | 10.492260884 | 0.680433991   | 0 | 0 | 0 | # | ob  |
| 1343 | 1 | 3 | -1.050000 | 13.513775495 | 10.490415515 | 4.902851743   | 0 | 0 | 0 | # | ob  |
| 1344 | 1 | 3 | -1.050000 | 12.681125134 | 12.724043172 | 3.7271147445  | 0 | 0 | 0 | # | ob  |
| 1345 | 1 | 3 | -1.050000 | 15.254542666 | 12.727559909 | 7.955469793   | 0 | 0 | 0 | # | ob  |
| 1346 | 1 | 3 | -1.050000 | 10.684199510 | 12.726845271 | 2.056943562   | 0 | 0 | 0 | # | ob  |
| 1347 | 1 | 3 | -1.050000 | 13.268759518 | 12.727122387 | 6.275700930   | 0 | 0 | 0 | # | ob  |

|      |   |   |           |              |              |               |   |   |   |   |     |
|------|---|---|-----------|--------------|--------------|---------------|---|---|---|---|-----|
| 1348 | 1 | 4 | -0.950000 | 11.299417447 | 10.414157382 | 6.456311812   | 0 | 0 | 0 | # | oh  |
| 1349 | 1 | 4 | -0.950000 | 13.884670440 | 10.401464731 | 2.229260000   | 0 | 0 | 0 | # | oh  |
| 1350 | 1 | 3 | -1.050000 | 12.694590946 | 12.450593209 | 0.417596118   | 0 | 0 | 0 | # | ob  |
| 1351 | 1 | 3 | -1.050000 | 15.288875993 | 12.434440270 | 4.648938892   | 0 | 0 | 0 | # | ob  |
| 1352 | 1 | 4 | -0.950000 | 11.928965723 | 8.455610067  | 7.582229270   | 0 | 0 | 0 | # | oh  |
| 1353 | 1 | 3 | -1.050000 | 10.525551485 | 6.422246611  | 5.162916698   | 0 | 0 | 0 | # | ob  |
| 1354 | 1 | 4 | -0.950000 | 14.514576468 | 8.443336781  | 3.355759607   | 0 | 0 | 0 | # | oh  |
| 1355 | 1 | 3 | -1.050000 | 13.119269734 | 6.406422954  | 0.944364434   | 0 | 0 | 0 | # | ob  |
| 1356 | 1 | 3 | -1.050000 | 11.325537272 | 10.475258613 | 3.353842278   | 0 | 0 | 0 | # | ob  |
| 1357 | 1 | 3 | -1.050000 | 13.899085134 | 10.482465238 | 7.587875661   | 0 | 0 | 0 | # | ob  |
| 1358 | 1 | 3 | -1.050000 | 14.881437623 | 8.364976708  | 0.681739972   | 0 | 0 | 0 | # | ob  |
| 1359 | 1 | 3 | -1.050000 | 10.559334585 | 6.129733707  | 1.856176368   | 0 | 0 | 0 | # | ob  |
| 1360 | 1 | 3 | -1.050000 | 13.133287271 | 6.133036431  | 6.084357725   | 0 | 0 | 0 | # | ob  |
| 1361 | 1 | 5 | 2.100000  | 11.202603477 | 12.104699038 | 3.452486522   | 0 | 0 | 0 | # | st  |
| 1362 | 1 | 5 | 2.100000  | 13.774629217 | 12.113680341 | 7.680379551   | 0 | 0 | 0 | # | st  |
| 1363 | 1 | 5 | 2.100000  | 14.697976051 | 6.746036608  | 0.744074984   | 0 | 0 | 0 | # | st  |
| 1364 | 1 | 5 | 2.100000  | 12.039333961 | 6.743339967  | 2.131278354   | 0 | 0 | 0 | # | st  |
| 1365 | 1 | 5 | 2.100000  | 14.611750250 | 6.752417420  | 6.359024273   | 0 | 0 | 0 | # | st  |
| 1366 | 1 | 5 | 2.100000  | 11.115878839 | 12.111149911 | 0.617961151   | 0 | 0 | 0 | # | st  |
| 1367 | 1 | 5 | 2.100000  | 13.704272668 | 12.107497425 | 4.839744045   | 0 | 0 | 0 | # | st  |
| 1368 | 1 | 5 | 2.100000  | 12.110018745 | 6.749404185  | 4.971778212   | 0 | 0 | 0 | # | st  |
| 1369 | 1 | 1 | 1.575000  | 12.890551898 | 9.441957326  | 14.792747493  | 0 | 0 | 0 | # | ao  |
| 1370 | 1 | 1 | 1.575000  | 15.477691886 | 9.431932665  | 10.569647493  | 0 | 0 | 0 | # | ao  |
| 1371 | 1 | 1 | 1.575000  | 10.336075843 | 9.425114554  | 16.141210963  | 0 | 0 | 0 | # | ao  |
| 1372 | 1 | 1 | 1.575000  | 12.923079300 | 9.415126926  | 11.918102305  | 0 | 0 | 0 | # | ao  |
| 1373 | 1 | 2 | 0.425000  | 13.441955855 | 10.809263371 | 9.911451013   | 0 | 0 | 0 | # | ho  |
| 1374 | 1 | 2 | 0.425000  | 10.871522528 | 10.907604153 | 14.180912462  | 0 | 0 | 0 | # | ho  |
| 1375 | 1 | 2 | 0.425000  | 14.943264323 | 7.953309910  | 12.532201022  | 0 | 0 | 0 | # | ho  |
| 1376 | 1 | 2 | 0.425000  | 12.371667415 | 8.047342661  | 16.799025190  | 0 | 0 | 0 | # | ho  |
| 1377 | 1 | 3 | -1.050000 | 12.299920767 | 8.366650650  | 13.358380749  | 0 | 0 | 0 | # | ob  |
| 1378 | 1 | 3 | -1.050000 | 11.914883948 | 8.374565989  | 10.673429865  | 0 | 0 | 0 | # | ob  |
| 1379 | 1 | 3 | -1.050000 | 14.488420410 | 8.381864470  | 14.907177115  | 0 | 0 | 0 | # | ob  |
| 1380 | 1 | 3 | -1.050000 | 12.545350450 | 6.129770541  | 11.985412584  | 0 | 0 | 0 | # | ob  |
| 1381 | 1 | 6 | -0.950000 | 15.129943942 | 6.130571910  | -17.594048299 | 0 | 0 | 0 | # | oht |
| 1382 | 1 | 3 | -1.050000 | 10.932205783 | 10.492260884 | 9.130033991   | 0 | 0 | 0 | # | ob  |
| 1383 | 1 | 3 | -1.050000 | 13.513775495 | 10.490415515 | 13.352451743  | 0 | 0 | 0 | # | ob  |
| 1384 | 1 | 3 | -1.050000 | 12.681125134 | 12.724043172 | 12.176747445  | 0 | 0 | 0 | # | ob  |
| 1385 | 1 | 3 | -1.050000 | 15.254542666 | 12.727559909 | 16.405069793  | 0 | 0 | 0 | # | ob  |
| 1386 | 1 | 3 | -1.050000 | 10.684199510 | 12.726845271 | 10.506543562  | 0 | 0 | 0 | # | ob  |
| 1387 | 1 | 3 | -1.050000 | 13.268759518 | 12.727122387 | 14.725300930  | 0 | 0 | 0 | # | ob  |
| 1388 | 1 | 4 | -0.950000 | 11.299417447 | 10.414157382 | 14.905911812  | 0 | 0 | 0 | # | oh  |
| 1389 | 1 | 4 | -0.950000 | 13.884670440 | 10.401464731 | 10.678860000  | 0 | 0 | 0 | # | oh  |
| 1390 | 1 | 3 | -1.050000 | 12.694590946 | 12.450593209 | 8.867196118   | 0 | 0 | 0 | # | ob  |
| 1391 | 1 | 3 | -1.050000 | 15.288875993 | 12.434440270 | 13.098538892  | 0 | 0 | 0 | # | ob  |
| 1392 | 1 | 7 | -0.950000 | 11.928965723 | 8.455610067  | 16.031829270  | 0 | 0 | 0 | # | oho |
| 1393 | 1 | 3 | -1.050000 | 10.525551485 | 6.422246611  | 13.612516698  | 0 | 0 | 0 | # | ob  |
| 1394 | 1 | 4 | -0.950000 | 14.514576468 | 8.443336781  | 11.805359607  | 0 | 0 | 0 | # | oh  |
| 1395 | 1 | 3 | -1.050000 | 13.119269734 | 6.406422954  | 9.393964434   | 0 | 0 | 0 | # | ob  |
| 1396 | 1 | 3 | -1.050000 | 11.325537272 | 10.475258613 | 11.803442278  | 0 | 0 | 0 | # | ob  |
| 1397 | 1 | 3 | -1.050000 | 13.899085134 | 10.482465238 | 16.037475661  | 0 | 0 | 0 | # | ob  |
| 1398 | 1 | 3 | -1.050000 | 14.881437623 | 8.364976708  | 9.131339972   | 0 | 0 | 0 | # | ob  |
| 1399 | 1 | 3 | -1.050000 | 10.559334585 | 6.129733707  | 10.305776368  | 0 | 0 | 0 | # | ob  |
| 1400 | 1 | 3 | -1.050000 | 13.133287271 | 6.133036431  | 14.533957725  | 0 | 0 | 0 | # | ob  |
| 1401 | 1 | 5 | 2.100000  | 11.202603477 | 12.104699038 | 11.902086522  | 0 | 0 | 0 | # | st  |
| 1402 | 1 | 5 | 2.100000  | 13.774629217 | 12.113680341 | 16.129979551  | 0 | 0 | 0 | # | st  |
| 1403 | 1 | 5 | 2.100000  | 14.697976051 | 6.746036608  | 9.193674984   | 0 | 0 | 0 | # | st  |
| 1404 | 1 | 5 | 2.100000  | 12.039333961 | 6.743339967  | 10.580878354  | 0 | 0 | 0 | # | st  |
| 1405 | 1 | 5 | 2.100000  | 14.611750250 | 6.752417420  | 14.808624273  | 0 | 0 | 0 | # | st  |
| 1406 | 1 | 5 | 2.100000  | 11.115878839 | 12.111149911 | 9.067561151   | 0 | 0 | 0 | # | st  |
| 1407 | 1 | 5 | 2.100000  | 13.704272668 | 12.107497425 | 13.289344045  | 0 | 0 | 0 | # | st  |
| 1408 | 1 | 5 | 2.100000  | 12.110018745 | 6.749404185  | 13.421378212  | 0 | 0 | 0 | # | st  |
| 1409 | 1 | 1 | 1.575000  | 12.890551898 | 9.441957326  | -10.556052507 | 0 | 0 | 0 | # | ao  |
| 1410 | 1 | 1 | 1.575000  | 15.477691886 | 9.431932665  | -14.779152507 | 0 | 0 | 0 | # | ao  |
| 1411 | 1 | 1 | 1.575000  | 10.336075843 | 9.425114554  | -9.207589037  | 0 | 0 | 0 | # | ao  |
| 1412 | 1 | 1 | 1.575000  | 12.923079300 | 9.415126926  | -13.430697695 | 0 | 0 | 0 | # | ao  |
| 1413 | 1 | 2 | 0.425000  | 13.441955855 | 10.809263371 | -15.437348987 | 0 | 0 | 0 | # | ho  |
| 1414 | 1 | 2 | 0.425000  | 10.871522528 | 10.907604153 | -11.167887538 | 0 | 0 | 0 | # | ho  |
| 1415 | 1 | 2 | 0.425000  | 14.943264323 | 7.953309910  | -12.816598978 | 0 | 0 | 0 | # | ho  |
| 1416 | 1 | 2 | 0.425000  | 12.371667415 | 8.047342661  | -8.549774810  | 0 | 0 | 0 | # | ho  |
| 1417 | 1 | 3 | -1.050000 | 12.299920767 | 8.366650650  | -11.990419251 | 0 | 0 | 0 | # | ob  |
| 1418 | 1 | 3 | -1.050000 | 11.914883948 | 8.374565989  | -14.675370135 | 0 | 0 | 0 | # | ob  |
| 1419 | 1 | 3 | -1.050000 | 14.488420410 | 8.381864470  | -10.441622885 | 0 | 0 | 0 | # | ob  |
| 1420 | 1 | 3 | -1.050000 | 12.545350450 | 6.129770541  | -13.363387416 | 0 | 0 | 0 | # | ob  |
| 1421 | 1 | 3 | -1.050000 | 15.129943942 | 6.130571910  | -9.144448299  | 0 | 0 | 0 | # | ob  |
| 1422 | 1 | 3 | -1.050000 | 10.932205783 | 10.492260884 | 17.579633991  | 0 | 0 | 0 | # | ob  |
| 1423 | 1 | 3 | -1.050000 | 13.513775495 | 10.490415515 | -11.996348257 | 0 | 0 | 0 | # | ob  |
| 1424 | 1 | 3 | -1.050000 | 12.681125134 | 12.724043172 | -13.172052555 | 0 | 0 | 0 | # | ob  |
| 1425 | 1 | 3 | -1.050000 | 15.254542666 | 12.727559909 | -8.943730207  | 0 | 0 | 0 | # | ob  |
| 1426 | 1 | 6 | -0.950000 | 10.684199510 | 12.726845271 | 18.956143562  | 0 | 0 | 0 | # | oht |
| 1427 | 1 | 3 | -1.050000 | 13.268759518 | 12.727122387 | -10.623499070 | 0 | 0 | 0 | # | ob  |
| 1428 | 1 | 4 | -0.950000 | 11.299417447 | 10.414157382 | -10.442888188 | 0 | 0 | 0 | # | oh  |
| 1429 | 1 | 7 | -0.950000 | 13.884670440 | 10.401464731 | -14.669940000 | 0 | 0 | 0 | # | oho |
| 1430 | 1 | 3 | -1.050000 | 12.694590946 | 12.450593209 | 17.316796118  | 0 | 0 | 0 | # | ob  |
| 1431 | 1 | 3 | -1.050000 | 15.288875993 | 12.434440270 | -12.250261108 | 0 | 0 | 0 | # | ob  |
| 1432 | 1 | 4 | -0.950000 | 11.928965723 | 8.455610067  | -9.316970730  | 0 | 0 | 0 | # | oh  |
| 1433 | 1 | 3 | -1.050000 | 10.525551485 | 6.422246611  | -11.736283302 | 0 | 0 | 0 | # | ob  |
| 1434 | 1 | 4 | -0.950000 | 14.514576468 | 8.443336781  | -13.543440393 | 0 | 0 | 0 | # | oh  |
| 1435 | 1 | 3 | -1.050000 | 13.119269734 | 6.406422954  | -15.954835566 | 0 | 0 | 0 | # | ob  |
| 1436 | 1 | 3 | -1.050000 | 11.325537272 | 10.475258613 | -13.545357722 | 0 | 0 | 0 | # | ob  |
| 1437 | 1 | 3 | -1.050000 | 13.899085134 | 10.482465238 | -9.311324339  | 0 | 0 | 0 | # | ob  |
| 1438 | 1 | 3 | -1.050000 | 14.881437623 | 8.364976708  | -16.217460028 | 0 | 0 | 0 | # | ob  |
| 1439 | 1 | 3 | -1.050000 | 10.559334585 | 6.129733707  | -15.043023632 | 0 | 0 | 0 | # | ob  |
| 1440 | 1 | 3 | -1.050000 | 13.133287271 | 6.133036431  | -10.814842275 | 0 | 0 | 0 | # | ob  |

|      |   |   |           |               |              |               |   |   |   |   |     |
|------|---|---|-----------|---------------|--------------|---------------|---|---|---|---|-----|
| 1441 | 1 | 5 | 2.100000  | 11.202603477  | 12.104699038 | -13.446713478 | 0 | 0 | 0 | # | st  |
| 1442 | 1 | 5 | 2.100000  | 13.774629217  | 12.113680341 | -9.218820449  | 0 | 0 | 0 | # | st  |
| 1443 | 1 | 5 | 2.100000  | 14.697976051  | 6.746036608  | -16.155125016 | 0 | 0 | 0 | # | st  |
| 1444 | 1 | 5 | 2.100000  | 12.039333961  | 6.743339967  | -14.767921646 | 0 | 0 | 0 | # | st  |
| 1445 | 1 | 5 | 2.100000  | 14.611750250  | 6.752417420  | -10.540175727 | 0 | 0 | 0 | # | st  |
| 1446 | 1 | 5 | 2.100000  | 11.115878839  | 12.111149911 | 17.517161151  | 0 | 0 | 0 | # | st  |
| 1447 | 1 | 5 | 2.100000  | 13.704272668  | 12.107497425 | -12.059455955 | 0 | 0 | 0 | # | st  |
| 1448 | 1 | 5 | 2.100000  | 12.110018745  | 6.749404185  | -11.927421788 | 0 | 0 | 0 | # | st  |
| 1449 | 1 | 1 | 1.575000  | 12.890551898  | 9.441957326  | -2.106452507  | 0 | 0 | 0 | # | ao  |
| 1450 | 1 | 1 | 1.575000  | 15.477691886  | 9.431932665  | -6.329552507  | 0 | 0 | 0 | # | ao  |
| 1451 | 1 | 1 | 1.575000  | 10.336075843  | 9.425114554  | -0.757989037  | 0 | 0 | 0 | # | ao  |
| 1452 | 1 | 1 | 1.575000  | 12.923079300  | 9.415126926  | -4.981097695  | 0 | 0 | 0 | # | ao  |
| 1453 | 1 | 2 | 0.425000  | 13.441955855  | 10.809263371 | -6.987748987  | 0 | 0 | 0 | # | ho  |
| 1454 | 1 | 2 | 0.425000  | 10.871522528  | 10.907604153 | -2.718287538  | 0 | 0 | 0 | # | ho  |
| 1455 | 1 | 2 | 0.425000  | 14.943264323  | 7.953309910  | -4.366998978  | 0 | 0 | 0 | # | ho  |
| 1456 | 1 | 2 | 0.425000  | 12.371667415  | 8.047342661  | -0.100174810  | 0 | 0 | 0 | # | ho  |
| 1457 | 1 | 3 | -1.050000 | 12.299920767  | 8.366650650  | -3.540819251  | 0 | 0 | 0 | # | ob  |
| 1458 | 1 | 3 | -1.050000 | 11.914883948  | 8.374565989  | -6.225770135  | 0 | 0 | 0 | # | ob  |
| 1459 | 1 | 3 | -1.050000 | 14.488420410  | 8.381864470  | -1.992022885  | 0 | 0 | 0 | # | ob  |
| 1460 | 1 | 3 | -1.050000 | 12.545350450  | 6.129770541  | -4.913787416  | 0 | 0 | 0 | # | ob  |
| 1461 | 1 | 3 | -1.050000 | 15.129943942  | 6.130571910  | -0.694848299  | 0 | 0 | 0 | # | ob  |
| 1462 | 1 | 3 | -1.050000 | 10.932205783  | 10.492260884 | -7.769166009  | 0 | 0 | 0 | # | ob  |
| 1463 | 1 | 3 | -1.050000 | 13.513775495  | 10.490415515 | -3.546748257  | 0 | 0 | 0 | # | ob  |
| 1464 | 1 | 3 | -1.050000 | 12.681125134  | 12.724043172 | -4.722452555  | 0 | 0 | 0 | # | ob  |
| 1465 | 1 | 3 | -1.050000 | 15.254542666  | 12.727559909 | -0.494130207  | 0 | 0 | 0 | # | ob  |
| 1466 | 1 | 3 | -1.050000 | 10.684199510  | 12.726845271 | -6.392656438  | 0 | 0 | 0 | # | ob  |
| 1467 | 1 | 3 | -1.050000 | 13.268759518  | 12.727122387 | -2.173899070  | 0 | 0 | 0 | # | ob  |
| 1468 | 1 | 4 | -0.950000 | 11.299417447  | 10.414157382 | -1.993288188  | 0 | 0 | 0 | # | oh  |
| 1469 | 1 | 4 | -0.950000 | 13.884670440  | 10.401464731 | -6.220340000  | 0 | 0 | 0 | # | oh  |
| 1470 | 1 | 3 | -1.050000 | 12.694590946  | 12.450593209 | -8.032003882  | 0 | 0 | 0 | # | ob  |
| 1471 | 1 | 3 | -1.050000 | 15.288875993  | 12.434440270 | -3.800661108  | 0 | 0 | 0 | # | ob  |
| 1472 | 1 | 4 | -0.950000 | 11.928965723  | 8.455610067  | -0.867370730  | 0 | 0 | 0 | # | oh  |
| 1473 | 1 | 3 | -1.050000 | 10.525551485  | 6.422246611  | -3.286683302  | 0 | 0 | 0 | # | ob  |
| 1474 | 1 | 4 | -0.950000 | 14.514576468  | 8.443336781  | -5.093840393  | 0 | 0 | 0 | # | oh  |
| 1475 | 1 | 3 | -1.050000 | 13.119269734  | 6.406422954  | -7.505235566  | 0 | 0 | 0 | # | ob  |
| 1476 | 1 | 3 | -1.050000 | 11.325537272  | 10.475258613 | -5.095757722  | 0 | 0 | 0 | # | ob  |
| 1477 | 1 | 3 | -1.050000 | 13.899085134  | 10.482465238 | -0.861724339  | 0 | 0 | 0 | # | ob  |
| 1478 | 1 | 3 | -1.050000 | 14.881437623  | 8.364976708  | -7.767860028  | 0 | 0 | 0 | # | ob  |
| 1479 | 1 | 3 | -1.050000 | 10.559334585  | 6.129733707  | -6.593423632  | 0 | 0 | 0 | # | ob  |
| 1480 | 1 | 3 | -1.050000 | 13.133287271  | 6.133036431  | -2.365242275  | 0 | 0 | 0 | # | ob  |
| 1481 | 1 | 5 | 2.100000  | 11.202603477  | 12.104699038 | -4.997113478  | 0 | 0 | 0 | # | st  |
| 1482 | 1 | 5 | 2.100000  | 13.774629217  | 12.113680341 | -0.769220449  | 0 | 0 | 0 | # | st  |
| 1483 | 1 | 5 | 2.100000  | 14.697976051  | 6.746036608  | -7.705525016  | 0 | 0 | 0 | # | st  |
| 1484 | 1 | 5 | 2.100000  | 12.039333961  | 6.743339967  | -6.318321646  | 0 | 0 | 0 | # | st  |
| 1485 | 1 | 5 | 2.100000  | 14.611750250  | 6.752417420  | -2.090575727  | 0 | 0 | 0 | # | st  |
| 1486 | 1 | 5 | 2.100000  | 11.115878839  | 12.111149911 | -7.831638849  | 0 | 0 | 0 | # | st  |
| 1487 | 1 | 5 | 2.100000  | 13.704272668  | 12.107497425 | -3.609855955  | 0 | 0 | 0 | # | st  |
| 1488 | 1 | 5 | 2.100000  | 12.110018745  | 6.749404185  | -3.477821788  | 0 | 0 | 0 | # | st  |
| 1489 | 1 | 6 | -0.950000 | 15.171651183  | 6.750028849  | 16.634714390  | 0 | 0 | 0 | # | oht |
| 1490 | 1 | 6 | -0.950000 | 10.915806465  | 12.345584659 | -15.319631379 | 0 | 0 | 0 | # | oht |
| 1491 | 1 | 2 | 0.425000  | 10.755563167  | 12.462755077 | -16.411736324 | 0 | 0 | 0 | # | ho  |
| 1492 | 1 | 2 | 0.425000  | 15.336389943  | 6.400141026  | -18.650841835 | 0 | 0 | 0 | # | ho  |
| 1493 | 1 | 2 | 0.425000  | 10.761038959  | 12.634198365 | 20.059598264  | 0 | 0 | 0 | # | ho  |
| 1494 | 1 | 2 | 0.425000  | 14.783433436  | 6.850413767  | 17.669755394  | 0 | 0 | 0 | # | ho  |
| 1495 | 1 | 1 | 1.575000  | -12.923448102 | 9.441957326  | 6.343147493   | 1 | 0 | 0 | # | ao  |
| 1496 | 1 | 1 | 1.575000  | -10.336308114 | 9.431932665  | 2.120047493   | 1 | 0 | 0 | # | ao  |
| 1497 | 1 | 1 | 1.575000  | -15.477924157 | 9.425114554  | 7.691610963   | 1 | 0 | 0 | # | ao  |
| 1498 | 1 | 1 | 1.575000  | -12.890920700 | 9.415126926  | 3.468502305   | 1 | 0 | 0 | # | ao  |
| 1499 | 1 | 2 | 0.425000  | -12.372044145 | 10.809263371 | 1.461851013   | 1 | 0 | 0 | # | ho  |
| 1500 | 1 | 2 | 0.425000  | -14.942477472 | 10.907604153 | 5.731312462   | 1 | 0 | 0 | # | ho  |
| 1501 | 1 | 2 | 0.425000  | -10.870735677 | 7.953309910  | 4.082601022   | 1 | 0 | 0 | # | ho  |
| 1502 | 1 | 2 | 0.425000  | -13.442332585 | 8.047342661  | 8.349425190   | 1 | 0 | 0 | # | ho  |
| 1503 | 1 | 3 | -1.050000 | -13.514079233 | 8.366650650  | 4.908780749   | 1 | 0 | 0 | # | ob  |
| 1504 | 1 | 3 | -1.050000 | -13.899116052 | 8.374565989  | 2.223829865   | 1 | 0 | 0 | # | ob  |
| 1505 | 1 | 3 | -1.050000 | -11.325579590 | 8.381864470  | 6.457577115   | 1 | 0 | 0 | # | ob  |
| 1506 | 1 | 3 | -1.050000 | -13.268649550 | 6.129770541  | 3.535812584   | 1 | 0 | 0 | # | ob  |
| 1507 | 1 | 3 | -1.050000 | -10.684056058 | 6.130571910  | 7.754751701   | 1 | 0 | 0 | # | ob  |
| 1508 | 1 | 3 | -1.050000 | -14.881794217 | 10.492260884 | 0.680433991   | 1 | 0 | 0 | # | ob  |
| 1509 | 1 | 3 | -1.050000 | -12.300224505 | 10.490415515 | 4.902851743   | 1 | 0 | 0 | # | ob  |
| 1510 | 1 | 3 | -1.050000 | -13.132874866 | 12.724043172 | 3.727147445   | 1 | 0 | 0 | # | ob  |
| 1511 | 1 | 3 | -1.050000 | -10.559457334 | 12.727559909 | 7.955469793   | 1 | 0 | 0 | # | ob  |
| 1512 | 1 | 3 | -1.050000 | -15.129800490 | 12.726845271 | 2.056943562   | 1 | 0 | 0 | # | ob  |
| 1513 | 1 | 3 | -1.050000 | -12.545240482 | 12.727122387 | 6.275700930   | 1 | 0 | 0 | # | ob  |
| 1514 | 1 | 4 | -0.950000 | -14.514582553 | 10.414157382 | 6.456311812   | 1 | 0 | 0 | # | oh  |
| 1515 | 1 | 4 | -0.950000 | -11.929329560 | 10.401464731 | 2.229260000   | 1 | 0 | 0 | # | oh  |
| 1516 | 1 | 3 | -1.050000 | -13.119409054 | 12.450593209 | 0.417596118   | 1 | 0 | 0 | # | ob  |
| 1517 | 1 | 3 | -1.050000 | -10.525124007 | 12.434440270 | 4.648938892   | 1 | 0 | 0 | # | ob  |
| 1518 | 1 | 4 | -0.950000 | -13.885034277 | 8.455610067  | 7.582229270   | 1 | 0 | 0 | # | oh  |
| 1519 | 1 | 3 | -1.050000 | -15.288448515 | 6.422246611  | 5.162916698   | 1 | 0 | 0 | # | ob  |
| 1520 | 1 | 4 | -0.950000 | -11.299423532 | 8.443336781  | 3.355759607   | 1 | 0 | 0 | # | oh  |
| 1521 | 1 | 3 | -1.050000 | -12.694730266 | 6.406422954  | 0.944364434   | 1 | 0 | 0 | # | ob  |
| 1522 | 1 | 3 | -1.050000 | -14.488462728 | 10.475258613 | 3.353842278   | 1 | 0 | 0 | # | ob  |
| 1523 | 1 | 3 | -1.050000 | -11.914914866 | 10.482465238 | 7.587875661   | 1 | 0 | 0 | # | ob  |
| 1524 | 1 | 3 | -1.050000 | -10.932562377 | 8.364976708  | 0.681739972   | 1 | 0 | 0 | # | ob  |
| 1525 | 1 | 3 | -1.050000 | -15.254665415 | 6.129733707  | 1.856176368   | 1 | 0 | 0 | # | ob  |
| 1526 | 1 | 3 | -1.050000 | -12.680712729 | 6.133036431  | 6.084357725   | 1 | 0 | 0 | # | ob  |
| 1527 | 1 | 5 | 2.100000  | -14.611396523 | 12.104699038 | 3.452486522   | 1 | 0 | 0 | # | st  |
| 1528 | 1 | 5 | 2.100000  | -12.039370783 | 12.113680341 | 7.680379551   | 1 | 0 | 0 | # | st  |
| 1529 | 1 | 5 | 2.100000  | -11.116023949 | 6.746036608  | 0.744074984   | 1 | 0 | 0 | # | st  |
| 1530 | 1 | 5 | 2.100000  | -13.774666039 | 6.743339967  | 2.131278354   | 1 | 0 | 0 | # | st  |
| 1531 | 1 | 5 | 2.100000  | -11.202249750 | 6.752417420  | 6.359024273   | 1 | 0 | 0 | # | st  |
| 1532 | 1 | 5 | 2.100000  | -14.698121161 | 12.111149911 | 0.617961151   | 1 | 0 | 0 | # | st  |
| 1533 | 1 | 5 | 2.100000  | -12.109727332 | 12.107497425 | 4.839744045   | 1 | 0 | 0 | # | st  |

|      |   |   |           |               |              |               |   |   |   |   |     |
|------|---|---|-----------|---------------|--------------|---------------|---|---|---|---|-----|
| 1534 | 1 | 5 | 2.100000  | -13.703981255 | 6.749404185  | 4.971778212   | 1 | 0 | 0 | # | st  |
| 1535 | 1 | 1 | 1.575000  | -12.923448102 | 9.441957326  | 14.792747493  | 1 | 0 | 0 | # | ao  |
| 1536 | 1 | 1 | 1.575000  | -10.336308114 | 9.431932665  | 10.569647493  | 1 | 0 | 0 | # | ao  |
| 1537 | 1 | 1 | 1.575000  | -15.477924157 | 9.425114554  | 16.141210963  | 1 | 0 | 0 | # | ao  |
| 1538 | 1 | 1 | 1.575000  | -12.890920700 | 9.415126926  | 11.918102305  | 1 | 0 | 0 | # | ao  |
| 1539 | 1 | 2 | 0.425000  | -12.372044145 | 10.809263371 | 9.911451013   | 1 | 0 | 0 | # | ho  |
| 1540 | 1 | 2 | 0.425000  | -14.942477472 | 10.907604153 | 14.180912462  | 1 | 0 | 0 | # | ho  |
| 1541 | 1 | 2 | 0.425000  | -10.870735677 | 7.953309910  | 12.532201022  | 1 | 0 | 0 | # | ho  |
| 1542 | 1 | 2 | 0.425000  | -13.442332585 | 8.047342661  | 16.799025190  | 1 | 0 | 0 | # | ho  |
| 1543 | 1 | 3 | -1.050000 | -13.514079233 | 8.366650650  | 13.358380749  | 1 | 0 | 0 | # | ob  |
| 1544 | 1 | 3 | -1.050000 | -13.899116052 | 8.374565989  | 10.673429865  | 1 | 0 | 0 | # | ob  |
| 1545 | 1 | 3 | -1.050000 | -11.325579590 | 8.381864470  | 14.907177115  | 1 | 0 | 0 | # | ob  |
| 1546 | 1 | 3 | -1.050000 | -13.268649550 | 6.129770541  | 11.985412584  | 1 | 0 | 0 | # | ob  |
| 1547 | 1 | 6 | -0.950000 | -10.684056058 | 6.130571910  | -17.594048299 | 1 | 0 | 0 | # | oht |
| 1548 | 1 | 3 | -1.050000 | -14.881794217 | 10.492260884 | 9.130033991   | 1 | 0 | 0 | # | ob  |
| 1549 | 1 | 3 | -1.050000 | -12.300224505 | 10.490415515 | 13.352451743  | 1 | 0 | 0 | # | ob  |
| 1550 | 1 | 3 | -1.050000 | -13.132874866 | 12.724043172 | 12.176747445  | 1 | 0 | 0 | # | ob  |
| 1551 | 1 | 3 | -1.050000 | -10.559457334 | 12.727559909 | 16.405069793  | 1 | 0 | 0 | # | ob  |
| 1552 | 1 | 3 | -1.050000 | -15.129800490 | 12.726845271 | 10.506543562  | 1 | 0 | 0 | # | ob  |
| 1553 | 1 | 3 | -1.050000 | -12.545240482 | 12.727122387 | 14.725300930  | 1 | 0 | 0 | # | ob  |
| 1554 | 1 | 4 | -0.950000 | -14.514582553 | 10.414157382 | 14.905911812  | 1 | 0 | 0 | # | oh  |
| 1555 | 1 | 4 | -0.950000 | -11.929329560 | 10.401464731 | 10.678860000  | 1 | 0 | 0 | # | oh  |
| 1556 | 1 | 3 | -1.050000 | -13.119409054 | 12.450593209 | 8.867196118   | 1 | 0 | 0 | # | ob  |
| 1557 | 1 | 3 | -1.050000 | -10.525124007 | 12.434440270 | 13.098538892  | 1 | 0 | 0 | # | ob  |
| 1558 | 1 | 7 | -0.950000 | -13.885034277 | 8.455610067  | 16.031829270  | 1 | 0 | 0 | # | oht |
| 1559 | 1 | 3 | -1.050000 | -15.288448515 | 6.422246611  | 13.612516698  | 1 | 0 | 0 | # | ob  |
| 1560 | 1 | 4 | -0.950000 | -11.299423532 | 8.443336781  | 11.805359607  | 1 | 0 | 0 | # | oh  |
| 1561 | 1 | 3 | -1.050000 | -12.694730266 | 6.406422954  | 9.393964434   | 1 | 0 | 0 | # | ob  |
| 1562 | 1 | 3 | -1.050000 | -14.488462728 | 10.475258613 | 11.803442278  | 1 | 0 | 0 | # | ob  |
| 1563 | 1 | 3 | -1.050000 | -11.914914866 | 10.482465238 | 16.037475661  | 1 | 0 | 0 | # | ob  |
| 1564 | 1 | 3 | -1.050000 | -10.932562377 | 8.364976708  | 9.131339972   | 1 | 0 | 0 | # | ob  |
| 1565 | 1 | 3 | -1.050000 | -15.254665415 | 6.129733707  | 10.305776368  | 1 | 0 | 0 | # | ob  |
| 1566 | 1 | 3 | -1.050000 | -12.680712729 | 6.133036431  | 14.533957725  | 1 | 0 | 0 | # | ob  |
| 1567 | 1 | 5 | 2.100000  | -14.611396523 | 12.104699038 | 11.902086522  | 1 | 0 | 0 | # | st  |
| 1568 | 1 | 5 | 2.100000  | -12.039370783 | 12.113680341 | 16.129979551  | 1 | 0 | 0 | # | st  |
| 1569 | 1 | 5 | 2.100000  | -11.116023949 | 6.746036608  | 9.193674984   | 1 | 0 | 0 | # | st  |
| 1570 | 1 | 5 | 2.100000  | -13.774666039 | 6.743339967  | 10.580878354  | 1 | 0 | 0 | # | st  |
| 1571 | 1 | 5 | 2.100000  | -11.202249750 | 6.752417420  | 14.808624273  | 1 | 0 | 0 | # | st  |
| 1572 | 1 | 5 | 2.100000  | -14.698121161 | 12.111149911 | 9.067561151   | 1 | 0 | 0 | # | st  |
| 1573 | 1 | 5 | 2.100000  | -12.109727332 | 12.107497425 | 13.289344045  | 1 | 0 | 0 | # | st  |
| 1574 | 1 | 5 | 2.100000  | -13.703981255 | 6.749404185  | 13.421378212  | 1 | 0 | 0 | # | st  |
| 1575 | 1 | 1 | 1.575000  | -12.923448102 | 9.441957326  | -10.556052507 | 1 | 0 | 0 | # | ao  |
| 1576 | 1 | 1 | 1.575000  | -10.336308114 | 9.431932665  | -14.779152507 | 1 | 0 | 0 | # | ao  |
| 1577 | 1 | 1 | 1.575000  | -15.477924157 | 9.425114554  | -9.207589037  | 1 | 0 | 0 | # | ao  |
| 1578 | 1 | 1 | 1.575000  | -12.890920700 | 9.415126926  | -13.430697695 | 1 | 0 | 0 | # | ao  |
| 1579 | 1 | 2 | 0.425000  | -12.372044145 | 10.809263371 | -15.437348987 | 1 | 0 | 0 | # | ho  |
| 1580 | 1 | 2 | 0.425000  | -14.942477472 | 10.907604153 | -11.167887538 | 1 | 0 | 0 | # | ho  |
| 1581 | 1 | 2 | 0.425000  | -10.870735677 | 7.953309910  | -12.816598978 | 1 | 0 | 0 | # | ho  |
| 1582 | 1 | 2 | 0.425000  | -13.442332585 | 8.047342661  | -8.549774810  | 1 | 0 | 0 | # | ho  |
| 1583 | 1 | 3 | -1.050000 | -13.514079233 | 8.366650650  | -11.990419251 | 1 | 0 | 0 | # | ob  |
| 1584 | 1 | 3 | -1.050000 | -13.899116052 | 8.374565989  | -14.675370135 | 1 | 0 | 0 | # | ob  |
| 1585 | 1 | 3 | -1.050000 | -11.325579590 | 8.381864470  | -10.441622885 | 1 | 0 | 0 | # | ob  |
| 1586 | 1 | 3 | -1.050000 | -13.268649550 | 6.129770541  | -13.363387416 | 1 | 0 | 0 | # | ob  |
| 1587 | 1 | 3 | -1.050000 | -10.684056058 | 6.130571910  | -9.144448299  | 1 | 0 | 0 | # | ob  |
| 1588 | 1 | 3 | -1.050000 | -14.881794217 | 10.492260884 | 17.579633991  | 1 | 0 | 0 | # | ob  |
| 1589 | 1 | 3 | -1.050000 | -12.300224505 | 10.490415515 | -11.996348257 | 1 | 0 | 0 | # | ob  |
| 1590 | 1 | 3 | -1.050000 | -13.132874866 | 12.724043172 | -13.172052555 | 1 | 0 | 0 | # | ob  |
| 1591 | 1 | 3 | -1.050000 | -10.559457334 | 12.727559909 | -8.943730207  | 1 | 0 | 0 | # | ob  |
| 1592 | 1 | 6 | -0.950000 | -15.129800490 | 12.726845271 | 18.956143562  | 1 | 0 | 0 | # | oht |
| 1593 | 1 | 3 | -1.050000 | -12.545240482 | 12.727122387 | -10.623499070 | 1 | 0 | 0 | # | ob  |
| 1594 | 1 | 4 | -0.950000 | -14.514582553 | 10.414157382 | -10.442888188 | 1 | 0 | 0 | # | oh  |
| 1595 | 1 | 7 | -0.950000 | -11.929329560 | 10.401464731 | -14.669940000 | 1 | 0 | 0 | # | oht |
| 1596 | 1 | 3 | -1.050000 | -13.119409054 | 12.450593209 | 17.316796118  | 1 | 0 | 0 | # | ob  |
| 1597 | 1 | 3 | -1.050000 | -10.525124007 | 12.434440270 | -12.250261108 | 1 | 0 | 0 | # | ob  |
| 1598 | 1 | 4 | -0.950000 | -13.885034277 | 8.455610067  | -9.316970730  | 1 | 0 | 0 | # | oh  |
| 1599 | 1 | 3 | -1.050000 | -15.288448515 | 6.422246611  | -11.736283302 | 1 | 0 | 0 | # | ob  |
| 1600 | 1 | 4 | -0.950000 | -11.299423532 | 8.443336781  | -13.543440393 | 1 | 0 | 0 | # | oh  |
| 1601 | 1 | 3 | -1.050000 | -12.694730266 | 6.406422954  | -15.954835566 | 1 | 0 | 0 | # | ob  |
| 1602 | 1 | 3 | -1.050000 | -14.488462728 | 10.475258613 | -13.545357722 | 1 | 0 | 0 | # | ob  |
| 1603 | 1 | 3 | -1.050000 | -11.914914866 | 10.482465238 | -9.311324339  | 1 | 0 | 0 | # | ob  |
| 1604 | 1 | 3 | -1.050000 | -10.932562377 | 8.364976708  | -16.217460028 | 1 | 0 | 0 | # | ob  |
| 1605 | 1 | 3 | -1.050000 | -15.254665415 | 6.129733707  | -15.043023632 | 1 | 0 | 0 | # | ob  |
| 1606 | 1 | 3 | -1.050000 | -12.680712729 | 6.133036431  | -10.814842275 | 1 | 0 | 0 | # | ob  |
| 1607 | 1 | 5 | 2.100000  | -14.611396523 | 12.104699038 | -13.446713478 | 1 | 0 | 0 | # | st  |
| 1608 | 1 | 5 | 2.100000  | -12.039370783 | 12.113680341 | -9.218820449  | 1 | 0 | 0 | # | st  |
| 1609 | 1 | 5 | 2.100000  | -11.116023949 | 6.746036608  | -16.155125016 | 1 | 0 | 0 | # | st  |
| 1610 | 1 | 5 | 2.100000  | -13.774666039 | 6.743339967  | -14.767921646 | 1 | 0 | 0 | # | st  |
| 1611 | 1 | 5 | 2.100000  | -11.202249750 | 6.752417420  | -10.540175727 | 1 | 0 | 0 | # | st  |
| 1612 | 1 | 5 | 2.100000  | -14.698121161 | 12.111149911 | 17.517161151  | 1 | 0 | 0 | # | st  |
| 1613 | 1 | 5 | 2.100000  | -12.109727332 | 12.107497425 | -12.059455955 | 1 | 0 | 0 | # | st  |
| 1614 | 1 | 5 | 2.100000  | -13.703981255 | 6.749404185  | -11.927421788 | 1 | 0 | 0 | # | st  |
| 1615 | 1 | 1 | 1.575000  | -12.923448102 | 9.441957326  | -2.106452507  | 1 | 0 | 0 | # | ao  |
| 1616 | 1 | 1 | 1.575000  | -10.336308114 | 9.431932665  | -6.329552507  | 1 | 0 | 0 | # | ao  |
| 1617 | 1 | 1 | 1.575000  | -15.477924157 | 9.425114554  | -0.757989037  | 1 | 0 | 0 | # | ao  |
| 1618 | 1 | 1 | 1.575000  | -12.890920700 | 9.415126926  | -4.981097695  | 1 | 0 | 0 | # | ao  |
| 1619 | 1 | 2 | 0.425000  | -12.372044145 | 10.809263371 | -6.987748987  | 1 | 0 | 0 | # | ho  |
| 1620 | 1 | 2 | 0.425000  | -14.942477472 | 10.907604153 | -2.718287538  | 1 | 0 | 0 | # | ho  |
| 1621 | 1 | 2 | 0.425000  | -10.870735677 | 7.953309910  | -4.366998978  | 1 | 0 | 0 | # | ho  |
| 1622 | 1 | 2 | 0.425000  | -13.442332585 | 8.047342661  | -0.100174810  | 1 | 0 | 0 | # | ho  |
| 1623 | 1 | 3 | -1.050000 | -13.514079233 | 8.366650650  | -3.540819251  | 1 | 0 | 0 | # | ob  |
| 1624 | 1 | 3 | -1.050000 | -13.899116052 | 8.374565989  | -6.225770135  | 1 | 0 | 0 | # | ob  |
| 1625 | 1 | 3 | -1.050000 | -11.325579590 | 8.381864470  | -1.992022885  | 1 | 0 | 0 | # | ob  |
| 1626 | 1 | 3 | -1.050000 | -13.268649550 | 6.129770541  | -4.913787416  | 1 | 0 | 0 | # | ob  |

|      |   |   |           |               |              |               |   |   |   |     |
|------|---|---|-----------|---------------|--------------|---------------|---|---|---|-----|
| 1627 | 1 | 3 | -1.050000 | -10.684056058 | 6.130571910  | -0.694848299  | 1 | 0 | 0 | ob  |
| 1628 | 1 | 3 | -1.050000 | -14.881794217 | 10.492260884 | -7.769166009  | 1 | 0 | 0 | ob  |
| 1629 | 1 | 3 | -1.050000 | -12.300224505 | 10.490415515 | -3.546748257  | 1 | 0 | 0 | ob  |
| 1630 | 1 | 3 | -1.050000 | -13.132874866 | 12.724043172 | -4.722452555  | 1 | 0 | 0 | ob  |
| 1631 | 1 | 3 | -1.050000 | -10.559457334 | 12.727559909 | -0.494130207  | 1 | 0 | 0 | ob  |
| 1632 | 1 | 3 | -1.050000 | -15.129800490 | 12.726845271 | -6.392656438  | 1 | 0 | 0 | ob  |
| 1633 | 1 | 3 | -1.050000 | -12.545240482 | 12.727122387 | -2.173899070  | 1 | 0 | 0 | ob  |
| 1634 | 1 | 4 | -0.950000 | -14.514582553 | 10.414157382 | -1.993288188  | 1 | 0 | 0 | oh  |
| 1635 | 1 | 4 | -0.950000 | -11.929329560 | 10.401464731 | -6.220340000  | 1 | 0 | 0 | oh  |
| 1636 | 1 | 3 | -1.050000 | -13.119409054 | 12.450593209 | -8.032003882  | 1 | 0 | 0 | ob  |
| 1637 | 1 | 3 | -1.050000 | -10.525124007 | 12.434440270 | -3.800661108  | 1 | 0 | 0 | ob  |
| 1638 | 1 | 4 | -0.950000 | -13.885034277 | 8.455610067  | -0.867370730  | 1 | 0 | 0 | oh  |
| 1639 | 1 | 3 | -1.050000 | -15.288448515 | 6.422246611  | -3.286683302  | 1 | 0 | 0 | ob  |
| 1640 | 1 | 4 | -0.950000 | -11.299423532 | 8.443336781  | -5.093840393  | 1 | 0 | 0 | oh  |
| 1641 | 1 | 3 | -1.050000 | -12.694730266 | 6.406422954  | -7.505235566  | 1 | 0 | 0 | ob  |
| 1642 | 1 | 3 | -1.050000 | -14.488462728 | 10.475258613 | -5.095757722  | 1 | 0 | 0 | ob  |
| 1643 | 1 | 3 | -1.050000 | -11.914914866 | 10.482465238 | -0.861724339  | 1 | 0 | 0 | ob  |
| 1644 | 1 | 3 | -1.050000 | -10.932562377 | 8.364976708  | -7.767860028  | 1 | 0 | 0 | ob  |
| 1645 | 1 | 3 | -1.050000 | -15.254665415 | 6.129733707  | -6.593423632  | 1 | 0 | 0 | ob  |
| 1646 | 1 | 3 | -1.050000 | -12.680712729 | 6.133036431  | -2.365242275  | 1 | 0 | 0 | ob  |
| 1647 | 1 | 5 | 2.100000  | -14.611396523 | 12.104699038 | -4.997113478  | 1 | 0 | 0 | st  |
| 1648 | 1 | 5 | 2.100000  | -12.039370783 | 12.113680341 | -0.769220449  | 1 | 0 | 0 | st  |
| 1649 | 1 | 5 | 2.100000  | -11.116023949 | 6.746036608  | -7.705525016  | 1 | 0 | 0 | st  |
| 1650 | 1 | 5 | 2.100000  | -13.774666039 | 6.743339967  | -6.318321646  | 1 | 0 | 0 | st  |
| 1651 | 1 | 5 | 2.100000  | -11.202249750 | 6.752417420  | -2.090575727  | 1 | 0 | 0 | st  |
| 1652 | 1 | 5 | 2.100000  | -14.698121161 | 12.111149911 | -7.831638849  | 1 | 0 | 0 | st  |
| 1653 | 1 | 5 | 2.100000  | -12.109727332 | 12.107497425 | -3.609855955  | 1 | 0 | 0 | st  |
| 1654 | 1 | 5 | 2.100000  | -13.703981255 | 6.749404185  | -3.477821788  | 1 | 0 | 0 | st  |
| 1655 | 1 | 6 | -0.950000 | -10.642348817 | 6.750028849  | 16.634714390  | 1 | 0 | 0 | oht |
| 1656 | 1 | 6 | -0.950000 | -14.898193535 | 12.345584659 | -15.319631379 | 1 | 0 | 0 | oht |
| 1657 | 1 | 2 | 0.425000  | -15.058436833 | 12.462755077 | -16.411736324 | 1 | 0 | 0 | ho  |
| 1658 | 1 | 2 | 0.425000  | -10.477610057 | 6.400141026  | -18.650841835 | 1 | 0 | 0 | ho  |
| 1659 | 1 | 2 | 0.425000  | -15.052961041 | 12.634198365 | 20.059598264  | 1 | 0 | 0 | ho  |
| 1660 | 1 | 2 | 0.425000  | -11.030566564 | 6.850413767  | 17.669755394  | 1 | 0 | 0 | ho  |
| 1661 | 1 | 1 | 1.575000  | -7.760648102  | 9.441957326  | 6.343147493   | 1 | 0 | 0 | ao  |
| 1662 | 1 | 1 | 1.575000  | -5.173508114  | 9.431932665  | 2.120047493   | 1 | 0 | 0 | ao  |
| 1663 | 1 | 1 | 1.575000  | -10.315124157 | 9.425114554  | 7.691610963   | 1 | 0 | 0 | ao  |
| 1664 | 1 | 1 | 1.575000  | -7.728120700  | 9.415126926  | 3.468502305   | 1 | 0 | 0 | ao  |
| 1665 | 1 | 2 | 0.425000  | -7.209244145  | 10.809263371 | 1.461851013   | 1 | 0 | 0 | ho  |
| 1666 | 1 | 2 | 0.425000  | -9.779677472  | 10.907604153 | 5.731312462   | 1 | 0 | 0 | ho  |
| 1667 | 1 | 2 | 0.425000  | -5.707935677  | 7.953309910  | 4.082601022   | 1 | 0 | 0 | ho  |
| 1668 | 1 | 2 | 0.425000  | -8.279532585  | 8.047342661  | 8.349425190   | 1 | 0 | 0 | ho  |
| 1669 | 1 | 3 | -1.050000 | -8.351279233  | 8.366650650  | 4.908780749   | 1 | 0 | 0 | ob  |
| 1670 | 1 | 3 | -1.050000 | -8.736316052  | 8.374565989  | 2.223829865   | 1 | 0 | 0 | ob  |
| 1671 | 1 | 3 | -1.050000 | -6.162779590  | 8.381864470  | 6.457577115   | 1 | 0 | 0 | ob  |
| 1672 | 1 | 3 | -1.050000 | -8.105849550  | 6.129770541  | 3.535812584   | 1 | 0 | 0 | ob  |
| 1673 | 1 | 3 | -1.050000 | -5.521256058  | 6.130571910  | 7.754751701   | 1 | 0 | 0 | ob  |
| 1674 | 1 | 3 | -1.050000 | -9.718994217  | 10.492260884 | 0.680433991   | 1 | 0 | 0 | ob  |
| 1675 | 1 | 3 | -1.050000 | -7.137424505  | 10.490415515 | 4.902851743   | 1 | 0 | 0 | ob  |
| 1676 | 1 | 3 | -1.050000 | -7.970074866  | 12.724043172 | 3.727147445   | 1 | 0 | 0 | ob  |
| 1677 | 1 | 3 | -1.050000 | -5.396657334  | 12.727559909 | 7.955469793   | 1 | 0 | 0 | ob  |
| 1678 | 1 | 3 | -1.050000 | -9.967000490  | 12.726845271 | 2.056943562   | 1 | 0 | 0 | ob  |
| 1679 | 1 | 3 | -1.050000 | -7.382440482  | 12.727122387 | 6.275700930   | 1 | 0 | 0 | ob  |
| 1680 | 1 | 4 | -0.950000 | -9.351782553  | 10.414157382 | 6.456311812   | 1 | 0 | 0 | oh  |
| 1681 | 1 | 4 | -0.950000 | -6.766529560  | 10.401464731 | 2.229260000   | 1 | 0 | 0 | oh  |
| 1682 | 1 | 3 | -1.050000 | -7.956609054  | 12.450593209 | 0.417596118   | 1 | 0 | 0 | ob  |
| 1683 | 1 | 3 | -1.050000 | -5.362234007  | 12.434440270 | 4.648938892   | 1 | 0 | 0 | ob  |
| 1684 | 1 | 4 | -0.950000 | -8.722234277  | 8.455610067  | 7.582229270   | 1 | 0 | 0 | oh  |
| 1685 | 1 | 3 | -1.050000 | -10.125648515 | 6.422246611  | 5.162916698   | 1 | 0 | 0 | ob  |
| 1686 | 1 | 4 | -0.950000 | -6.136623532  | 8.443336781  | 3.355759607   | 1 | 0 | 0 | oh  |
| 1687 | 1 | 3 | -1.050000 | -7.531930266  | 6.406422954  | 0.944364434   | 1 | 0 | 0 | ob  |
| 1688 | 1 | 3 | -1.050000 | -9.325662728  | 10.475258613 | 3.353842278   | 1 | 0 | 0 | ob  |
| 1689 | 1 | 3 | -1.050000 | -6.752114866  | 10.482465238 | 7.587875661   | 1 | 0 | 0 | ob  |
| 1690 | 1 | 3 | -1.050000 | -5.769762377  | 8.364976708  | 0.681739972   | 1 | 0 | 0 | ob  |
| 1691 | 1 | 3 | -1.050000 | -10.091865415 | 6.129733707  | 1.856176368   | 1 | 0 | 0 | ob  |
| 1692 | 1 | 3 | -1.050000 | -7.517912729  | 6.133036431  | 6.084357725   | 1 | 0 | 0 | ob  |
| 1693 | 1 | 5 | 2.100000  | -9.448596523  | 12.104699038 | 3.452486522   | 1 | 0 | 0 | st  |
| 1694 | 1 | 5 | 2.100000  | -6.876570783  | 12.113680341 | 7.680379551   | 1 | 0 | 0 | st  |
| 1695 | 1 | 5 | 2.100000  | -5.953223949  | 6.746036608  | 0.744074984   | 1 | 0 | 0 | st  |
| 1696 | 1 | 5 | 2.100000  | -8.611866039  | 6.743339967  | 2.131278354   | 1 | 0 | 0 | st  |
| 1697 | 1 | 5 | 2.100000  | -6.039449750  | 6.752417420  | 6.359024273   | 1 | 0 | 0 | st  |
| 1698 | 1 | 5 | 2.100000  | -9.535321161  | 12.111149911 | 0.617961151   | 1 | 0 | 0 | st  |
| 1699 | 1 | 5 | 2.100000  | -6.946927332  | 12.107497425 | 4.839744045   | 1 | 0 | 0 | st  |
| 1700 | 1 | 5 | 2.100000  | -8.541181255  | 6.749404185  | 4.971778212   | 1 | 0 | 0 | st  |
| 1701 | 1 | 1 | 1.575000  | -7.760648102  | 9.441957326  | 14.792747493  | 1 | 0 | 0 | ao  |
| 1702 | 1 | 1 | 1.575000  | -5.173508114  | 9.431932665  | 10.569647493  | 1 | 0 | 0 | ao  |
| 1703 | 1 | 1 | 1.575000  | -10.315124157 | 9.425114554  | 16.141210963  | 1 | 0 | 0 | ao  |
| 1704 | 1 | 1 | 1.575000  | -7.728120700  | 9.415126926  | 11.918102305  | 1 | 0 | 0 | ao  |
| 1705 | 1 | 2 | 0.425000  | -7.209244145  | 10.809263371 | 9.911451013   | 1 | 0 | 0 | ho  |
| 1706 | 1 | 2 | 0.425000  | -9.779677472  | 10.907604153 | 14.180912462  | 1 | 0 | 0 | ho  |
| 1707 | 1 | 2 | 0.425000  | -5.707935677  | 7.953309910  | 12.532201022  | 1 | 0 | 0 | ho  |
| 1708 | 1 | 2 | 0.425000  | -8.279532585  | 8.047342661  | 16.799025190  | 1 | 0 | 0 | ho  |
| 1709 | 1 | 3 | -1.050000 | -8.351279233  | 8.366650650  | 13.358380749  | 1 | 0 | 0 | ob  |
| 1710 | 1 | 3 | -1.050000 | -8.736316052  | 8.374565989  | 10.673429865  | 1 | 0 | 0 | ob  |
| 1711 | 1 | 3 | -1.050000 | -6.162779590  | 8.381864470  | 14.907177115  | 1 | 0 | 0 | ob  |
| 1712 | 1 | 3 | -1.050000 | -8.105849550  | 6.129770541  | 11.985412584  | 1 | 0 | 0 | ob  |
| 1713 | 1 | 6 | -0.950000 | -5.521256058  | 6.130571910  | -17.594048299 | 1 | 0 | 0 | oht |
| 1714 | 1 | 3 | -1.050000 | -9.718994217  | 10.492260884 | 9.130033991   | 1 | 0 | 0 | ob  |
| 1715 | 1 | 3 | -1.050000 | -7.137424505  | 10.490415515 | 13.352451743  | 1 | 0 | 0 | ob  |
| 1716 | 1 | 3 | -1.050000 | -7.970074866  | 12.724043172 | 12.176747445  | 1 | 0 | 0 | ob  |
| 1717 | 1 | 3 | -1.050000 | -5.396657334  | 12.727559909 | 16.405069793  | 1 | 0 | 0 | ob  |
| 1718 | 1 | 3 | -1.050000 | -9.967000490  | 12.726845271 | 10.506543562  | 1 | 0 | 0 | ob  |
| 1719 | 1 | 3 | -1.050000 | -7.382440482  | 12.727122387 | 14.725300930  | 1 | 0 | 0 | ob  |

|      |   |   |           |               |              |               |   |   |   |     |
|------|---|---|-----------|---------------|--------------|---------------|---|---|---|-----|
| 1720 | 1 | 4 | -0.950000 | -9.351782553  | 10.414157382 | 14.905911812  | 1 | 0 | 0 | oh  |
| 1721 | 1 | 4 | -0.950000 | -6.766529560  | 10.401464731 | 10.678860000  | 1 | 0 | 0 | oh  |
| 1722 | 1 | 3 | -1.050000 | -7.956609054  | 12.450593209 | 8.867196118   | 1 | 0 | 0 | ob  |
| 1723 | 1 | 3 | -1.050000 | -5.362324007  | 12.434440270 | 13.098538892  | 1 | 0 | 0 | ob  |
| 1724 | 1 | 7 | -0.950000 | -8.722234277  | 8.455610067  | 16.031829270  | 1 | 0 | 0 | oho |
| 1725 | 1 | 3 | -1.050000 | -10.125648515 | 6.422246611  | 13.612516698  | 1 | 0 | 0 | ob  |
| 1726 | 1 | 4 | -0.950000 | -6.136623532  | 8.443336781  | 11.805359607  | 1 | 0 | 0 | oh  |
| 1727 | 1 | 3 | -1.050000 | -7.531930266  | 6.406422954  | 9.393964434   | 1 | 0 | 0 | ob  |
| 1728 | 1 | 3 | -1.050000 | -9.325662728  | 10.475258613 | 11.803442278  | 1 | 0 | 0 | ob  |
| 1729 | 1 | 3 | -1.050000 | -6.752114866  | 10.482465238 | 16.037475661  | 1 | 0 | 0 | ob  |
| 1730 | 1 | 3 | -1.050000 | -5.769762377  | 8.364976708  | 9.131339972   | 1 | 0 | 0 | ob  |
| 1731 | 1 | 3 | -1.050000 | -10.091865415 | 6.129733707  | 10.305776368  | 1 | 0 | 0 | ob  |
| 1732 | 1 | 3 | -1.050000 | -7.517912729  | 6.133036431  | 14.533957725  | 1 | 0 | 0 | ob  |
| 1733 | 1 | 5 | 2.100000  | -9.448596523  | 12.104699038 | 11.902086522  | 1 | 0 | 0 | st  |
| 1734 | 1 | 5 | 2.100000  | -6.876570783  | 12.113680341 | 16.129979551  | 1 | 0 | 0 | st  |
| 1735 | 1 | 5 | 2.100000  | -5.953223949  | 6.746036608  | 9.193674984   | 1 | 0 | 0 | st  |
| 1736 | 1 | 5 | 2.100000  | -8.611866039  | 6.743339967  | 10.580878354  | 1 | 0 | 0 | st  |
| 1737 | 1 | 5 | 2.100000  | -6.039449750  | 6.752417420  | 14.808624273  | 1 | 0 | 0 | st  |
| 1738 | 1 | 5 | 2.100000  | -9.535321161  | 12.111149911 | 9.067561151   | 1 | 0 | 0 | st  |
| 1739 | 1 | 5 | 2.100000  | -6.946927332  | 12.107497425 | 13.289344045  | 1 | 0 | 0 | st  |
| 1740 | 1 | 5 | 2.100000  | -8.541181255  | 6.749404185  | 13.421378212  | 1 | 0 | 0 | st  |
| 1741 | 1 | 1 | 1.575000  | -7.760648102  | 9.441957326  | -10.556052507 | 1 | 0 | 0 | ao  |
| 1742 | 1 | 1 | 1.575000  | -5.173508114  | 9.431932665  | -14.779152507 | 1 | 0 | 0 | ao  |
| 1743 | 1 | 1 | 1.575000  | -10.315124157 | 9.425114554  | -9.207589037  | 1 | 0 | 0 | ao  |
| 1744 | 1 | 1 | 1.575000  | -7.728120700  | 9.415126926  | -13.430697695 | 1 | 0 | 0 | ao  |
| 1745 | 1 | 2 | 0.425000  | -7.209244145  | 10.809263371 | -15.437348987 | 1 | 0 | 0 | ho  |
| 1746 | 1 | 2 | 0.425000  | -9.779677472  | 10.907604153 | -11.167887538 | 1 | 0 | 0 | ho  |
| 1747 | 1 | 2 | 0.425000  | -5.707935677  | 7.953309910  | -12.816598978 | 1 | 0 | 0 | ho  |
| 1748 | 1 | 2 | 0.425000  | -8.279532585  | 8.047342661  | -8.549774810  | 1 | 0 | 0 | ho  |
| 1749 | 1 | 3 | -1.050000 | -8.351279233  | 8.366650650  | -11.990419251 | 1 | 0 | 0 | ob  |
| 1750 | 1 | 3 | -1.050000 | -8.736316052  | 8.374565989  | -14.675370135 | 1 | 0 | 0 | ob  |
| 1751 | 1 | 3 | -1.050000 | -6.162779590  | 8.381864470  | -10.441622885 | 1 | 0 | 0 | ob  |
| 1752 | 1 | 3 | -1.050000 | -8.105849550  | 6.129770541  | -13.363387416 | 1 | 0 | 0 | ob  |
| 1753 | 1 | 3 | -1.050000 | -5.521256058  | 6.130571910  | -9.144482999  | 1 | 0 | 0 | ob  |
| 1754 | 1 | 3 | -1.050000 | -9.718994217  | 10.492260884 | 17.579633991  | 1 | 0 | 0 | ob  |
| 1755 | 1 | 3 | -1.050000 | -7.137424505  | 10.490415515 | -11.996348257 | 1 | 0 | 0 | ob  |
| 1756 | 1 | 3 | -1.050000 | -7.970074866  | 12.724043172 | -13.172052555 | 1 | 0 | 0 | ob  |
| 1757 | 1 | 3 | -1.050000 | -5.396657334  | 12.727559909 | -8.943730207  | 1 | 0 | 0 | ob  |
| 1758 | 1 | 6 | -0.950000 | -9.967000490  | 12.726845271 | 18.956143562  | 1 | 0 | 0 | oht |
| 1759 | 1 | 3 | -1.050000 | -7.382440482  | 12.727122387 | -10.623499070 | 1 | 0 | 0 | ob  |
| 1760 | 1 | 4 | -0.950000 | -9.351782553  | 10.414157382 | -10.442888188 | 1 | 0 | 0 | oh  |
| 1761 | 1 | 7 | -0.950000 | -6.766529560  | 10.401464731 | -14.669940000 | 1 | 0 | 0 | oho |
| 1762 | 1 | 3 | -1.050000 | -7.956609054  | 12.450593209 | 17.316796118  | 1 | 0 | 0 | ob  |
| 1763 | 1 | 3 | -1.050000 | -5.362324007  | 12.434440270 | -12.250261108 | 1 | 0 | 0 | ob  |
| 1764 | 1 | 4 | -0.950000 | -8.722234277  | 8.455610067  | -9.316970730  | 1 | 0 | 0 | oh  |
| 1765 | 1 | 3 | -1.050000 | -10.125648515 | 6.422246611  | -11.736283302 | 1 | 0 | 0 | ob  |
| 1766 | 1 | 4 | -0.950000 | -6.136623532  | 8.443336781  | -13.543440393 | 1 | 0 | 0 | oh  |
| 1767 | 1 | 3 | -1.050000 | -7.531930266  | 6.406422954  | -15.954835566 | 1 | 0 | 0 | ob  |
| 1768 | 1 | 3 | -1.050000 | -9.325662728  | 10.475258613 | -13.545357722 | 1 | 0 | 0 | ob  |
| 1769 | 1 | 3 | -1.050000 | -6.752114866  | 10.482465238 | -9.311324339  | 1 | 0 | 0 | ob  |
| 1770 | 1 | 3 | -1.050000 | -5.769762377  | 8.364976708  | -16.217460028 | 1 | 0 | 0 | ob  |
| 1771 | 1 | 3 | -1.050000 | -10.091865415 | 6.129733707  | -15.043023632 | 1 | 0 | 0 | ob  |
| 1772 | 1 | 3 | -1.050000 | -7.517912729  | 6.133036431  | -10.814842275 | 1 | 0 | 0 | ob  |
| 1773 | 1 | 5 | 2.100000  | -9.448596523  | 12.104699038 | -13.446713478 | 1 | 0 | 0 | st  |
| 1774 | 1 | 5 | 2.100000  | -6.876570783  | 12.113680341 | -9.218820449  | 1 | 0 | 0 | st  |
| 1775 | 1 | 5 | 2.100000  | -5.953223949  | 6.746036608  | -16.155125016 | 1 | 0 | 0 | st  |
| 1776 | 1 | 5 | 2.100000  | -8.611866039  | 6.743339967  | -14.767921646 | 1 | 0 | 0 | st  |
| 1777 | 1 | 5 | 2.100000  | -6.039449750  | 6.752417420  | -10.540175727 | 1 | 0 | 0 | st  |
| 1778 | 1 | 5 | 2.100000  | -9.535321161  | 12.111149911 | 17.517161151  | 1 | 0 | 0 | st  |
| 1779 | 1 | 5 | 2.100000  | -6.946927332  | 12.107497425 | -12.059455955 | 1 | 0 | 0 | st  |
| 1780 | 1 | 5 | 2.100000  | -8.541181255  | 6.749404185  | -11.927421788 | 1 | 0 | 0 | st  |
| 1781 | 1 | 1 | 1.575000  | -7.760648102  | 9.441957326  | -2.106452507  | 1 | 0 | 0 | ao  |
| 1782 | 1 | 1 | 1.575000  | -5.173508114  | 9.431932665  | -6.329552507  | 1 | 0 | 0 | ao  |
| 1783 | 1 | 1 | 1.575000  | -10.315124157 | 9.425114554  | -0.757989037  | 1 | 0 | 0 | ao  |
| 1784 | 1 | 1 | 1.575000  | -7.728120700  | 9.415126926  | -4.981097695  | 1 | 0 | 0 | ao  |
| 1785 | 1 | 2 | 0.425000  | -7.209244145  | 10.809263371 | -6.987748987  | 1 | 0 | 0 | ho  |
| 1786 | 1 | 2 | 0.425000  | -9.779677472  | 10.907604153 | -2.718287538  | 1 | 0 | 0 | ho  |
| 1787 | 1 | 2 | 0.425000  | -5.707935677  | 7.953309910  | -4.366998978  | 1 | 0 | 0 | ho  |
| 1788 | 1 | 2 | 0.425000  | -8.279532585  | 8.047342661  | -0.100174810  | 1 | 0 | 0 | ho  |
| 1789 | 1 | 3 | -1.050000 | -8.351279233  | 8.366650650  | -3.540819251  | 1 | 0 | 0 | ob  |
| 1790 | 1 | 3 | -1.050000 | -8.736316052  | 8.374565989  | -6.225770135  | 1 | 0 | 0 | ob  |
| 1791 | 1 | 3 | -1.050000 | -6.162779590  | 8.381864470  | -1.992022885  | 1 | 0 | 0 | ob  |
| 1792 | 1 | 3 | -1.050000 | -8.105849550  | 6.129770541  | -4.913787416  | 1 | 0 | 0 | ob  |
| 1793 | 1 | 3 | -1.050000 | -5.521256058  | 6.130571910  | -0.694848299  | 1 | 0 | 0 | ob  |
| 1794 | 1 | 3 | -1.050000 | -9.718994217  | 10.492260884 | -7.769166009  | 1 | 0 | 0 | ob  |
| 1795 | 1 | 3 | -1.050000 | -7.137424505  | 10.490415515 | -3.546748257  | 1 | 0 | 0 | ob  |
| 1796 | 1 | 3 | -1.050000 | -7.970074866  | 12.724043172 | -4.722452555  | 1 | 0 | 0 | ob  |
| 1797 | 1 | 3 | -1.050000 | -5.396657334  | 12.727559909 | -0.494130207  | 1 | 0 | 0 | ob  |
| 1798 | 1 | 3 | -1.050000 | -9.967000490  | 12.726845271 | -6.392656438  | 1 | 0 | 0 | ob  |
| 1799 | 1 | 3 | -1.050000 | -7.382440482  | 12.727122387 | -2.173899070  | 1 | 0 | 0 | ob  |
| 1800 | 1 | 4 | -0.950000 | -9.351782553  | 10.414157382 | -1.993288188  | 1 | 0 | 0 | oh  |
| 1801 | 1 | 4 | -0.950000 | -6.766529560  | 10.401464731 | -6.220340000  | 1 | 0 | 0 | oh  |
| 1802 | 1 | 3 | -1.050000 | -7.956609054  | 12.450593209 | -8.032003882  | 1 | 0 | 0 | ob  |
| 1803 | 1 | 3 | -1.050000 | -5.362324007  | 12.434440270 | -3.800661108  | 1 | 0 | 0 | ob  |
| 1804 | 1 | 4 | -0.950000 | -8.722234277  | 8.455610067  | -0.867370730  | 1 | 0 | 0 | oh  |
| 1805 | 1 | 3 | -1.050000 | -10.125648515 | 6.422246611  | -3.286683302  | 1 | 0 | 0 | ob  |
| 1806 | 1 | 4 | -0.950000 | -6.136623532  | 8.443336781  | -5.093840393  | 1 | 0 | 0 | oh  |
| 1807 | 1 | 3 | -1.050000 | -7.531930266  | 6.406422954  | -7.505235566  | 1 | 0 | 0 | ob  |
| 1808 | 1 | 3 | -1.050000 | -9.325662728  | 10.475258613 | -5.095757722  | 1 | 0 | 0 | ob  |
| 1809 | 1 | 3 | -1.050000 | -6.752114866  | 10.482465238 | -0.861724339  | 1 | 0 | 0 | ob  |
| 1810 | 1 | 3 | -1.050000 | -5.769762377  | 8.364976708  | -7.767860028  | 1 | 0 | 0 | ob  |
| 1811 | 1 | 3 | -1.050000 | -10.091865415 | 6.129733707  | -6.593423632  | 1 | 0 | 0 | ob  |
| 1812 | 1 | 3 | -1.050000 | -7.517912729  | 6.133036431  | -2.365242275  | 1 | 0 | 0 | ob  |

|      |   |   |           |              |              |               |   |   |   |     |
|------|---|---|-----------|--------------|--------------|---------------|---|---|---|-----|
| 1813 | 1 | 5 | 2.100000  | -9.448596523 | 12.104699038 | -4.997113478  | 1 | 0 | 0 | st  |
| 1814 | 1 | 5 | 2.100000  | -6.876570783 | 12.113680341 | -0.769220449  | 1 | 0 | 0 | st  |
| 1815 | 1 | 5 | 2.100000  | -5.953223949 | 6.746036608  | -7.705525016  | 1 | 0 | 0 | st  |
| 1816 | 1 | 5 | 2.100000  | -8.611866039 | 6.743339967  | -6.318321646  | 1 | 0 | 0 | st  |
| 1817 | 1 | 5 | 2.100000  | -6.039449750 | 6.752417420  | -2.090575727  | 1 | 0 | 0 | st  |
| 1818 | 1 | 5 | 2.100000  | -9.535321161 | 12.111149911 | -7.831638849  | 1 | 0 | 0 | st  |
| 1819 | 1 | 5 | 2.100000  | -6.946927332 | 12.107497425 | -3.609855955  | 1 | 0 | 0 | st  |
| 1820 | 1 | 5 | 2.100000  | -8.541181255 | 6.749404185  | -3.477821788  | 1 | 0 | 0 | st  |
| 1821 | 1 | 6 | -0.950000 | -5.479548817 | 6.750028849  | 16.634714390  | 1 | 0 | 0 | oht |
| 1822 | 1 | 6 | -0.950000 | -9.735393535 | 12.345584659 | -15.319631379 | 1 | 0 | 0 | oht |
| 1823 | 1 | 2 | 0.425000  | -9.895636833 | 12.462755077 | -16.411736324 | 1 | 0 | 0 | ho  |
| 1824 | 1 | 2 | 0.425000  | -5.314810057 | 6.400141026  | -18.650841835 | 1 | 0 | 0 | ho  |
| 1825 | 1 | 2 | 0.425000  | -9.890161041 | 12.634198365 | 20.059598264  | 1 | 0 | 0 | ho  |
| 1826 | 1 | 2 | 0.425000  | -5.867766564 | 6.850413767  | 17.669755394  | 1 | 0 | 0 | ho  |
| 1827 | 1 | 1 | 1.575000  | -2.597848102 | 9.441957326  | 6.343147493   | 1 | 0 | 0 | ao  |
| 1828 | 1 | 1 | 1.575000  | -0.010708114 | 9.431932665  | 2.120047493   | 1 | 0 | 0 | ao  |
| 1829 | 1 | 1 | 1.575000  | -5.152324157 | 9.425114554  | 7.691610963   | 1 | 0 | 0 | ao  |
| 1830 | 1 | 1 | 1.575000  | -2.565320700 | 9.415126926  | 3.468502305   | 1 | 0 | 0 | ao  |
| 1831 | 1 | 2 | 0.425000  | -2.046444145 | 10.809263371 | 1.461851013   | 1 | 0 | 0 | ho  |
| 1832 | 1 | 2 | 0.425000  | -4.616877472 | 10.907604153 | 5.731312462   | 1 | 0 | 0 | ho  |
| 1833 | 1 | 2 | 0.425000  | -0.545135677 | 7.953309910  | 4.082601022   | 1 | 0 | 0 | ho  |
| 1834 | 1 | 2 | 0.425000  | -3.116732585 | 8.047342661  | 8.349425190   | 1 | 0 | 0 | ho  |
| 1835 | 1 | 3 | -1.050000 | -3.188479233 | 8.366650650  | 4.908780749   | 1 | 0 | 0 | ob  |
| 1836 | 1 | 3 | -1.050000 | -3.573516052 | 8.374565989  | 2.223829865   | 1 | 0 | 0 | ob  |
| 1837 | 1 | 3 | -1.050000 | -0.999979590 | 8.381864470  | 6.457577115   | 1 | 0 | 0 | ob  |
| 1838 | 1 | 3 | -1.050000 | -2.943049550 | 6.129770541  | 3.535812584   | 1 | 0 | 0 | ob  |
| 1839 | 1 | 3 | -1.050000 | -0.358456058 | 6.130571910  | 7.754751701   | 1 | 0 | 0 | ob  |
| 1840 | 1 | 3 | -1.050000 | -4.556194217 | 10.492260884 | 0.680433991   | 1 | 0 | 0 | ob  |
| 1841 | 1 | 3 | -1.050000 | -1.974624505 | 10.490415515 | 4.902851743   | 1 | 0 | 0 | ob  |
| 1842 | 1 | 3 | -1.050000 | -2.807274866 | 12.724043172 | 3.727147445   | 1 | 0 | 0 | ob  |
| 1843 | 1 | 3 | -1.050000 | -0.233857334 | 12.727559909 | 7.955469793   | 1 | 0 | 0 | ob  |
| 1844 | 1 | 3 | -1.050000 | -4.804200490 | 12.726845271 | 2.056943562   | 1 | 0 | 0 | ob  |
| 1845 | 1 | 3 | -1.050000 | -2.219640482 | 12.727122387 | 6.275700930   | 1 | 0 | 0 | ob  |
| 1846 | 1 | 4 | -0.950000 | -4.188982553 | 10.414157382 | 6.456311812   | 1 | 0 | 0 | oh  |
| 1847 | 1 | 4 | -0.950000 | -1.603729560 | 10.401464731 | 2.229260000   | 1 | 0 | 0 | oh  |
| 1848 | 1 | 3 | -1.050000 | -2.793809054 | 12.450593209 | 0.417596118   | 1 | 0 | 0 | ob  |
| 1849 | 1 | 3 | -1.050000 | -0.199524007 | 12.434440270 | 4.648938892   | 1 | 0 | 0 | ob  |
| 1850 | 1 | 4 | -0.950000 | -3.559434277 | 8.455610067  | 7.582229270   | 1 | 0 | 0 | oh  |
| 1851 | 1 | 3 | -1.050000 | -4.962848515 | 6.422246611  | 5.162916698   | 1 | 0 | 0 | ob  |
| 1852 | 1 | 4 | -0.950000 | -0.973823532 | 8.443336781  | 3.355759607   | 1 | 0 | 0 | oh  |
| 1853 | 1 | 3 | -1.050000 | -2.369130266 | 6.406422954  | 0.944364434   | 1 | 0 | 0 | ob  |
| 1854 | 1 | 3 | -1.050000 | -4.162862728 | 10.475258613 | 3.353842278   | 1 | 0 | 0 | ob  |
| 1855 | 1 | 3 | -1.050000 | -1.589314866 | 10.482465238 | 7.587875661   | 1 | 0 | 0 | ob  |
| 1856 | 1 | 3 | -1.050000 | -0.606962377 | 8.364976708  | 0.681739972   | 1 | 0 | 0 | ob  |
| 1857 | 1 | 3 | -1.050000 | -4.929065415 | 6.129733707  | 1.856176368   | 1 | 0 | 0 | ob  |
| 1858 | 1 | 3 | -1.050000 | -2.355112729 | 6.133036431  | 6.084357725   | 1 | 0 | 0 | ob  |
| 1859 | 1 | 5 | 2.100000  | -4.285796523 | 12.104699038 | 3.452486522   | 1 | 0 | 0 | st  |
| 1860 | 1 | 5 | 2.100000  | -1.713770783 | 12.113680341 | 7.680379551   | 1 | 0 | 0 | st  |
| 1861 | 1 | 5 | 2.100000  | -0.790423949 | 6.746036608  | 0.744074984   | 1 | 0 | 0 | st  |
| 1862 | 1 | 5 | 2.100000  | -3.449066039 | 6.743339967  | 2.131278354   | 1 | 0 | 0 | st  |
| 1863 | 1 | 5 | 2.100000  | -0.876649750 | 6.752417420  | 6.359024273   | 1 | 0 | 0 | st  |
| 1864 | 1 | 5 | 2.100000  | -4.372521161 | 12.111149911 | 0.617961151   | 1 | 0 | 0 | st  |
| 1865 | 1 | 5 | 2.100000  | -1.784127332 | 12.107497425 | 4.839744045   | 1 | 0 | 0 | st  |
| 1866 | 1 | 5 | 2.100000  | -3.378381255 | 6.749404185  | 4.971778212   | 1 | 0 | 0 | st  |
| 1867 | 1 | 1 | 1.575000  | -2.597848102 | 9.441957326  | 14.792747493  | 1 | 0 | 0 | ao  |
| 1868 | 1 | 1 | 1.575000  | -0.010708114 | 9.431932665  | 10.569647493  | 1 | 0 | 0 | ao  |
| 1869 | 1 | 1 | 1.575000  | -5.152324157 | 9.425114554  | 16.141210963  | 1 | 0 | 0 | ao  |
| 1870 | 1 | 1 | 1.575000  | -2.565320700 | 9.415126926  | 11.918102305  | 1 | 0 | 0 | ao  |
| 1871 | 1 | 2 | 0.425000  | -2.046444145 | 10.809263371 | 9.911451013   | 1 | 0 | 0 | ho  |
| 1872 | 1 | 2 | 0.425000  | -4.616877472 | 10.907604153 | 14.180912462  | 1 | 0 | 0 | ho  |
| 1873 | 1 | 2 | 0.425000  | -0.545135677 | 7.953309910  | 12.532201022  | 1 | 0 | 0 | ho  |
| 1874 | 1 | 2 | 0.425000  | -3.116732585 | 8.047342661  | 16.799025190  | 1 | 0 | 0 | ho  |
| 1875 | 1 | 3 | -1.050000 | -3.188479233 | 8.366650650  | 13.358380749  | 1 | 0 | 0 | ob  |
| 1876 | 1 | 3 | -1.050000 | -3.573516052 | 8.374565989  | 10.673429865  | 1 | 0 | 0 | ob  |
| 1877 | 1 | 3 | -1.050000 | -0.999979590 | 8.381864470  | 14.907177115  | 1 | 0 | 0 | ob  |
| 1878 | 1 | 3 | -1.050000 | -2.943049550 | 6.129770541  | 11.985412584  | 1 | 0 | 0 | ob  |
| 1879 | 1 | 6 | -0.950000 | -0.358456058 | 6.130571910  | -17.594048299 | 1 | 0 | 0 | oht |
| 1880 | 1 | 3 | -1.050000 | -4.556194217 | 10.492260884 | 9.130033991   | 1 | 0 | 0 | ob  |
| 1881 | 1 | 3 | -1.050000 | -1.974624505 | 10.490415515 | 13.352451743  | 1 | 0 | 0 | ob  |
| 1882 | 1 | 3 | -1.050000 | -2.807274866 | 12.724043172 | 12.176747445  | 1 | 0 | 0 | ob  |
| 1883 | 1 | 3 | -1.050000 | -0.233857334 | 12.727559909 | 16.405069793  | 1 | 0 | 0 | ob  |
| 1884 | 1 | 3 | -1.050000 | -4.804200490 | 12.726845271 | 10.506543562  | 1 | 0 | 0 | ob  |
| 1885 | 1 | 3 | -1.050000 | -2.219640482 | 12.727122387 | 14.725300930  | 1 | 0 | 0 | ob  |
| 1886 | 1 | 4 | -0.950000 | -4.188982553 | 10.414157382 | 14.905911812  | 1 | 0 | 0 | oh  |
| 1887 | 1 | 4 | -0.950000 | -1.603729560 | 10.401464731 | 10.678860000  | 1 | 0 | 0 | oh  |
| 1888 | 1 | 3 | -1.050000 | -2.793809054 | 12.450593209 | 8.867196118   | 1 | 0 | 0 | ob  |
| 1889 | 1 | 3 | -1.050000 | -0.199524007 | 12.434440270 | 13.098538892  | 1 | 0 | 0 | ob  |
| 1890 | 1 | 7 | -0.950000 | -3.559434277 | 8.455610067  | 16.031829270  | 1 | 0 | 0 | oho |
| 1891 | 1 | 3 | -1.050000 | -4.962848515 | 6.422246611  | 13.612516698  | 1 | 0 | 0 | ob  |
| 1892 | 1 | 4 | -0.950000 | -0.973823532 | 8.443336781  | 11.805359607  | 1 | 0 | 0 | oh  |
| 1893 | 1 | 3 | -1.050000 | -2.369130266 | 6.406422954  | 9.393964434   | 1 | 0 | 0 | ob  |
| 1894 | 1 | 3 | -1.050000 | -4.162862728 | 10.475258613 | 11.803442278  | 1 | 0 | 0 | ob  |
| 1895 | 1 | 3 | -1.050000 | -1.589314866 | 10.482465238 | 16.037475661  | 1 | 0 | 0 | ob  |
| 1896 | 1 | 3 | -1.050000 | -0.606962377 | 8.364976708  | 9.131339972   | 1 | 0 | 0 | ob  |
| 1897 | 1 | 3 | -1.050000 | -4.929065415 | 6.129733707  | 10.305776368  | 1 | 0 | 0 | ob  |
| 1898 | 1 | 3 | -1.050000 | -2.355112729 | 6.133036431  | 14.533957725  | 1 | 0 | 0 | ob  |
| 1899 | 1 | 5 | 2.100000  | -4.285796523 | 12.104699038 | 11.902086522  | 1 | 0 | 0 | st  |
| 1900 | 1 | 5 | 2.100000  | -1.713770783 | 12.113680341 | 16.129979551  | 1 | 0 | 0 | st  |
| 1901 | 1 | 5 | 2.100000  | -0.790423949 | 6.746036608  | 9.193674984   | 1 | 0 | 0 | st  |
| 1902 | 1 | 5 | 2.100000  | -3.449066039 | 6.743339967  | 10.580878354  | 1 | 0 | 0 | st  |
| 1903 | 1 | 5 | 2.100000  | -0.876649750 | 6.752417420  | 14.808624273  | 1 | 0 | 0 | st  |
| 1904 | 1 | 5 | 2.100000  | -4.372521161 | 12.111149911 | 9.067561151   | 1 | 0 | 0 | st  |
| 1905 | 1 | 5 | 2.100000  | -1.784127332 | 12.107497425 | 13.289344045  | 1 | 0 | 0 | st  |



|      |   |   |           |              |               |               |   |   |   |   |     |
|------|---|---|-----------|--------------|---------------|---------------|---|---|---|---|-----|
| 1906 | 1 | 5 | 2.100000  | -3.378381255 | 6.749404185   | 13.421378212  | 1 | 0 | 0 | # | st  |
| 1907 | 1 | 1 | 1.575000  | -2.597848102 | 9.441957326   | -10.556052507 | 1 | 0 | 0 | # | ao  |
| 1908 | 1 | 1 | 1.575000  | -0.010708114 | 9.431932665   | -14.779152507 | 1 | 0 | 0 | # | ao  |
| 1909 | 1 | 1 | 1.575000  | -5.152324157 | 9.425114554   | -9.207589037  | 1 | 0 | 0 | # | ao  |
| 1910 | 1 | 1 | 1.575000  | -2.565320700 | 9.415126926   | -13.430697695 | 1 | 0 | 0 | # | ao  |
| 1911 | 1 | 2 | 0.425000  | -2.046444145 | 10.809263371  | -15.437348987 | 1 | 0 | 0 | # | ho  |
| 1912 | 1 | 2 | 0.425000  | -4.616877472 | 10.907604153  | -11.167887538 | 1 | 0 | 0 | # | ho  |
| 1913 | 1 | 2 | 0.425000  | -0.545135677 | 7.953309910   | -12.816598978 | 1 | 0 | 0 | # | ho  |
| 1914 | 1 | 2 | 0.425000  | -3.116732585 | 8.047342661   | -8.549774810  | 1 | 0 | 0 | # | ho  |
| 1915 | 1 | 3 | -1.050000 | -3.188479233 | 8.366650650   | -11.990419251 | 1 | 0 | 0 | # | ob  |
| 1916 | 1 | 3 | -1.050000 | -3.573516052 | 8.374565989   | -14.675370135 | 1 | 0 | 0 | # | ob  |
| 1917 | 1 | 3 | -1.050000 | -0.999979590 | 8.381864470   | -10.441622885 | 1 | 0 | 0 | # | ob  |
| 1918 | 1 | 3 | -1.050000 | -2.943049550 | 6.129770541   | -13.363387416 | 1 | 0 | 0 | # | ob  |
| 1919 | 1 | 3 | -1.050000 | -0.358456058 | 6.130571910   | -9.144448299  | 1 | 0 | 0 | # | ob  |
| 1920 | 1 | 3 | -1.050000 | -4.556194217 | 10.492260884  | 17.579633991  | 1 | 0 | 0 | # | ob  |
| 1921 | 1 | 3 | -1.050000 | -1.974624505 | 10.490415515  | -11.996348257 | 1 | 0 | 0 | # | ob  |
| 1922 | 1 | 3 | -1.050000 | -2.807274866 | 12.724043172  | -13.172052555 | 1 | 0 | 0 | # | ob  |
| 1923 | 1 | 3 | -1.050000 | -0.233857334 | 12.727559909  | -8.943730207  | 1 | 0 | 0 | # | ob  |
| 1924 | 1 | 6 | -0.950000 | -4.804200490 | 12.726845271  | 18.956143562  | 1 | 0 | 0 | # | oht |
| 1925 | 1 | 3 | -1.050000 | -2.219640482 | 12.727122387  | -10.623499070 | 1 | 0 | 0 | # | ob  |
| 1926 | 1 | 4 | -0.950000 | -4.188982553 | 10.414157382  | -10.442888188 | 1 | 0 | 0 | # | oh  |
| 1927 | 1 | 7 | -0.950000 | -1.603729560 | 10.401464731  | -14.669940000 | 1 | 0 | 0 | # | oho |
| 1928 | 1 | 3 | -1.050000 | -2.793809054 | 12.450593209  | 17.316796118  | 1 | 0 | 0 | # | ob  |
| 1929 | 1 | 3 | -1.050000 | -0.199524007 | 12.434440270  | -12.250261108 | 1 | 0 | 0 | # | ob  |
| 1930 | 1 | 4 | -0.950000 | -3.559434277 | 8.455610067   | -9.316970730  | 1 | 0 | 0 | # | oh  |
| 1931 | 1 | 3 | -1.050000 | -4.962848515 | 6.422246611   | -11.736283302 | 1 | 0 | 0 | # | ob  |
| 1932 | 1 | 4 | -0.950000 | -0.973823532 | 8.443336781   | -13.543440393 | 1 | 0 | 0 | # | oh  |
| 1933 | 1 | 3 | -1.050000 | -2.369130266 | 6.406422954   | -15.954835566 | 1 | 0 | 0 | # | ob  |
| 1934 | 1 | 3 | -1.050000 | -4.162862728 | 10.475258613  | -13.545357722 | 1 | 0 | 0 | # | ob  |
| 1935 | 1 | 3 | -1.050000 | -1.589314866 | 10.482465238  | -9.311324339  | 1 | 0 | 0 | # | ob  |
| 1936 | 1 | 3 | -1.050000 | -0.606962377 | 8.364976708   | -16.217460028 | 1 | 0 | 0 | # | ob  |
| 1937 | 1 | 3 | -1.050000 | -4.929065415 | 6.129733707   | -15.043023632 | 1 | 0 | 0 | # | ob  |
| 1938 | 1 | 3 | -1.050000 | -2.355112729 | 6.133036431   | -10.814842275 | 1 | 0 | 0 | # | ob  |
| 1939 | 1 | 5 | 2.100000  | -4.285796523 | 12.104699038  | -13.446713478 | 1 | 0 | 0 | # | st  |
| 1940 | 1 | 5 | 2.100000  | -1.713770783 | 12.113680341  | -9.218820449  | 1 | 0 | 0 | # | st  |
| 1941 | 1 | 5 | 2.100000  | -0.790423949 | 6.746036608   | -16.155125016 | 1 | 0 | 0 | # | st  |
| 1942 | 1 | 5 | 2.100000  | -3.449066039 | 6.743339967   | -14.767921646 | 1 | 0 | 0 | # | st  |
| 1943 | 1 | 5 | 2.100000  | -0.876649750 | 6.752417420   | -10.540175727 | 1 | 0 | 0 | # | st  |
| 1944 | 1 | 5 | 2.100000  | -4.372521161 | 12.111149911  | 17.517161151  | 1 | 0 | 0 | # | st  |
| 1945 | 1 | 5 | 2.100000  | -1.784127332 | 12.107497425  | -12.059455955 | 1 | 0 | 0 | # | st  |
| 1946 | 1 | 5 | 2.100000  | -3.378381255 | 6.749404185   | -11.927421788 | 1 | 0 | 0 | # | st  |
| 1947 | 1 | 1 | 1.575000  | -2.597848102 | 9.441957326   | -2.106452507  | 1 | 0 | 0 | # | ao  |
| 1948 | 1 | 1 | 1.575000  | -0.010708114 | 9.431932665   | -6.329552507  | 1 | 0 | 0 | # | ao  |
| 1949 | 1 | 1 | 1.575000  | -5.152324157 | 9.425114554   | -0.757989037  | 1 | 0 | 0 | # | ao  |
| 1950 | 1 | 1 | 1.575000  | -2.565320700 | 9.415126926   | -4.981097695  | 1 | 0 | 0 | # | ao  |
| 1951 | 1 | 2 | 0.425000  | -2.046444145 | 10.809263371  | -6.987748987  | 1 | 0 | 0 | # | ho  |
| 1952 | 1 | 2 | 0.425000  | -4.616877472 | 10.907604153  | -2.718287538  | 1 | 0 | 0 | # | ho  |
| 1953 | 1 | 2 | 0.425000  | -0.545135677 | 7.953309910   | -4.366998978  | 1 | 0 | 0 | # | ho  |
| 1954 | 1 | 2 | 0.425000  | -3.116732585 | 8.047342661   | -0.100174810  | 1 | 0 | 0 | # | ho  |
| 1955 | 1 | 3 | -1.050000 | -3.188479233 | 8.366650650   | -3.540819251  | 1 | 0 | 0 | # | ob  |
| 1956 | 1 | 3 | -1.050000 | -3.573516052 | 8.374565989   | -6.225770135  | 1 | 0 | 0 | # | ob  |
| 1957 | 1 | 3 | -1.050000 | -0.999979590 | 8.381864470   | -1.992022885  | 1 | 0 | 0 | # | ob  |
| 1958 | 1 | 3 | -1.050000 | -2.943049550 | 6.129770541   | -4.913787416  | 1 | 0 | 0 | # | ob  |
| 1959 | 1 | 3 | -1.050000 | -0.358456058 | 6.130571910   | -0.694848299  | 1 | 0 | 0 | # | ob  |
| 1960 | 1 | 3 | -1.050000 | -4.556194217 | 10.492260884  | -7.769166009  | 1 | 0 | 0 | # | ob  |
| 1961 | 1 | 3 | -1.050000 | -1.974624505 | 10.490415515  | -3.546748257  | 1 | 0 | 0 | # | ob  |
| 1962 | 1 | 3 | -1.050000 | -2.807274866 | 12.724043172  | -4.722452555  | 1 | 0 | 0 | # | ob  |
| 1963 | 1 | 3 | -1.050000 | -0.233857334 | 12.727559909  | -0.494130207  | 1 | 0 | 0 | # | ob  |
| 1964 | 1 | 3 | -1.050000 | -4.804200490 | 12.726845271  | -6.392656438  | 1 | 0 | 0 | # | ob  |
| 1965 | 1 | 3 | -1.050000 | -2.219640482 | 12.727122387  | -2.173899070  | 1 | 0 | 0 | # | ob  |
| 1966 | 1 | 4 | -0.950000 | -4.188982553 | 10.414157382  | -1.993288188  | 1 | 0 | 0 | # | oh  |
| 1967 | 1 | 4 | -0.950000 | -1.603729560 | 10.401464731  | -6.220340000  | 1 | 0 | 0 | # | oh  |
| 1968 | 1 | 3 | -1.050000 | -2.793809054 | 12.450593209  | -8.032003882  | 1 | 0 | 0 | # | ob  |
| 1969 | 1 | 3 | -1.050000 | -0.199524007 | 12.434440270  | -3.800661108  | 1 | 0 | 0 | # | ob  |
| 1970 | 1 | 4 | -0.950000 | -3.559434277 | 8.455610067   | -0.867370730  | 1 | 0 | 0 | # | oh  |
| 1971 | 1 | 3 | -1.050000 | -4.962848515 | 6.422246611   | -3.286683302  | 1 | 0 | 0 | # | ob  |
| 1972 | 1 | 4 | -0.950000 | -0.973823532 | 8.443336781   | -5.093840393  | 1 | 0 | 0 | # | oh  |
| 1973 | 1 | 3 | -1.050000 | -2.369130266 | 6.406422954   | -7.505235566  | 1 | 0 | 0 | # | ob  |
| 1974 | 1 | 3 | -1.050000 | -4.162862728 | 10.475258613  | -5.095757722  | 1 | 0 | 0 | # | ob  |
| 1975 | 1 | 3 | -1.050000 | -1.589314866 | 10.482465238  | -0.861724339  | 1 | 0 | 0 | # | ob  |
| 1976 | 1 | 3 | -1.050000 | -0.606962377 | 8.364976708   | -7.767860028  | 1 | 0 | 0 | # | ob  |
| 1977 | 1 | 3 | -1.050000 | -4.929065415 | 6.129733707   | -6.593423632  | 1 | 0 | 0 | # | ob  |
| 1978 | 1 | 3 | -1.050000 | -2.355112729 | 6.133036431   | -2.365242275  | 1 | 0 | 0 | # | ob  |
| 1979 | 1 | 5 | 2.100000  | -4.285796523 | 12.104699038  | -4.997113478  | 1 | 0 | 0 | # | st  |
| 1980 | 1 | 5 | 2.100000  | -1.713770783 | 12.113680341  | -0.769220449  | 1 | 0 | 0 | # | st  |
| 1981 | 1 | 5 | 2.100000  | -0.790423949 | 6.746036608   | -7.705525016  | 1 | 0 | 0 | # | st  |
| 1982 | 1 | 5 | 2.100000  | -3.449066039 | 6.743339967   | -6.318321646  | 1 | 0 | 0 | # | st  |
| 1983 | 1 | 5 | 2.100000  | -0.876649750 | 6.752417420   | -2.090575727  | 1 | 0 | 0 | # | st  |
| 1984 | 1 | 5 | 2.100000  | -4.372521161 | 12.111149911  | -7.831638849  | 1 | 0 | 0 | # | st  |
| 1985 | 1 | 5 | 2.100000  | -1.784127332 | 12.107497425  | -3.609855955  | 1 | 0 | 0 | # | st  |
| 1986 | 1 | 5 | 2.100000  | -3.378381255 | 6.749404185   | -3.477821788  | 1 | 0 | 0 | # | st  |
| 1987 | 1 | 6 | -0.950000 | -0.316748817 | 6.750028849   | 16.634714390  | 1 | 0 | 0 | # | oht |
| 1988 | 1 | 6 | -0.950000 | -4.572593535 | 12.345584659  | -15.319631379 | 1 | 0 | 0 | # | oht |
| 1989 | 1 | 2 | 0.425000  | -4.732836833 | 12.462755077  | -16.411736324 | 1 | 0 | 0 | # | ho  |
| 1990 | 1 | 2 | 0.425000  | -0.152010057 | 6.400141026   | -18.650841835 | 1 | 0 | 0 | # | ho  |
| 1991 | 1 | 2 | 0.425000  | -4.727361041 | 12.634198365  | 20.059598264  | 1 | 0 | 0 | # | ho  |
| 1992 | 1 | 2 | 0.425000  | -0.704966564 | 6.850413767   | 17.669755394  | 1 | 0 | 0 | # | ho  |
| 1993 | 1 | 1 | 1.575000  | 2.564951898  | -18.710342674 | 6.343147493   | 0 | 1 | 0 | # | ao  |
| 1994 | 1 | 1 | 1.575000  | 5.152091886  | -18.720367335 | 2.120047493   | 0 | 1 | 0 | # | ao  |
| 1995 | 1 | 1 | 1.575000  | 0.010475843  | -18.727185446 | 7.691610963   | 0 | 1 | 0 | # | ao  |
| 1996 | 1 | 1 | 1.575000  | 2.597479300  | -18.737173074 | 3.468502305   | 0 | 1 | 0 | # | ao  |
| 1997 | 1 | 2 | 0.425000  | 3.116355855  | -17.343036629 | 1.461851013   | 0 | 1 | 0 | # | ho  |
| 1998 | 1 | 2 | 0.425000  | 0.545922528  | -17.244695847 | 5.731312462   | 0 | 1 | 0 | # | ho  |

|      |   |   |           |             |               |               |   |   |   |     |
|------|---|---|-----------|-------------|---------------|---------------|---|---|---|-----|
| 1999 | 1 | 2 | 0.425000  | 4.617664323 | 17.337409910  | 4.082601022   | 0 | 0 | 0 | ho  |
| 2000 | 1 | 2 | 0.425000  | 2.046067415 | 17.431442661  | 8.349425190   | 0 | 0 | 0 | ho  |
| 2001 | 1 | 3 | -1.050000 | 1.974320767 | 17.750750650  | 4.908780749   | 0 | 0 | 0 | ob  |
| 2002 | 1 | 3 | -1.050000 | 1.589283948 | 17.758665989  | 2.223829865   | 0 | 0 | 0 | ob  |
| 2003 | 1 | 3 | -1.050000 | 4.162820410 | 17.765964470  | 6.457577115   | 0 | 0 | 0 | ob  |
| 2004 | 1 | 3 | -1.050000 | 2.219750450 | 15.513870541  | 3.535812584   | 0 | 0 | 0 | ob  |
| 2005 | 1 | 3 | -1.050000 | 4.804343942 | 15.514671910  | 7.754751701   | 0 | 0 | 0 | ob  |
| 2006 | 1 | 3 | -1.050000 | 0.606605783 | -17.660039116 | 0.680433991   | 0 | 1 | 0 | ob  |
| 2007 | 1 | 3 | -1.050000 | 3.188175495 | -17.661884485 | 4.902851743   | 0 | 1 | 0 | ob  |
| 2008 | 1 | 3 | -1.050000 | 2.355525134 | -15.428256828 | 3.727147445   | 0 | 1 | 0 | ob  |
| 2009 | 1 | 3 | -1.050000 | 4.928942666 | -15.424740091 | 7.955469793   | 0 | 1 | 0 | ob  |
| 2010 | 1 | 3 | -1.050000 | 0.358599510 | -15.425454729 | 2.056943562   | 0 | 1 | 0 | ob  |
| 2011 | 1 | 3 | -1.050000 | 2.943159518 | -15.425177613 | 6.275700930   | 0 | 1 | 0 | ob  |
| 2012 | 1 | 4 | -0.950000 | 0.973817447 | -17.738142618 | 6.456311812   | 0 | 1 | 0 | oh  |
| 2013 | 1 | 4 | -0.950000 | 3.559070440 | -17.750835269 | 2.229260000   | 0 | 1 | 0 | oh  |
| 2014 | 1 | 3 | -1.050000 | 2.368990946 | -15.701706791 | 0.417596118   | 0 | 1 | 0 | ob  |
| 2015 | 1 | 3 | -1.050000 | 4.963275993 | -15.717859730 | 4.648938892   | 0 | 1 | 0 | ob  |
| 2016 | 1 | 4 | -0.950000 | 1.603365723 | 17.839710067  | 7.582229270   | 0 | 0 | 0 | oh  |
| 2017 | 1 | 3 | -1.050000 | 0.199951485 | 15.806346611  | 5.162916698   | 0 | 0 | 0 | ob  |
| 2018 | 1 | 4 | -0.950000 | 4.188976468 | 17.827436781  | 3.355759607   | 0 | 0 | 0 | oh  |
| 2019 | 1 | 3 | -1.050000 | 2.793669734 | 15.790522954  | 0.944364434   | 0 | 0 | 0 | ob  |
| 2020 | 1 | 3 | -1.050000 | 0.999937272 | -17.677041387 | 3.353842278   | 0 | 1 | 0 | ob  |
| 2021 | 1 | 3 | -1.050000 | 3.573485134 | -17.669834762 | 7.587875661   | 0 | 1 | 0 | ob  |
| 2022 | 1 | 3 | -1.050000 | 4.555837623 | 17.749076708  | 0.681739972   | 0 | 0 | 0 | ob  |
| 2023 | 1 | 3 | -1.050000 | 0.233734585 | 15.513833707  | 1.856176368   | 0 | 0 | 0 | ob  |
| 2024 | 1 | 3 | -1.050000 | 2.807687271 | 15.517136431  | 6.084357725   | 0 | 0 | 0 | ob  |
| 2025 | 1 | 5 | 2.100000  | 0.877003477 | -16.047600962 | 3.452486522   | 0 | 1 | 0 | st  |
| 2026 | 1 | 5 | 2.100000  | 3.449029217 | -16.038619659 | 7.680379551   | 0 | 1 | 0 | st  |
| 2027 | 1 | 5 | 2.100000  | 4.372376051 | 16.130136608  | 0.744074984   | 0 | 0 | 0 | st  |
| 2028 | 1 | 5 | 2.100000  | 1.713733961 | 16.127439967  | 2.131278354   | 0 | 0 | 0 | st  |
| 2029 | 1 | 5 | 2.100000  | 4.286150250 | 16.136517420  | 6.359024273   | 0 | 0 | 0 | st  |
| 2030 | 1 | 5 | 2.100000  | 0.790278839 | -16.041150089 | 0.617961151   | 0 | 1 | 0 | st  |
| 2031 | 1 | 5 | 2.100000  | 3.378672668 | -16.044802575 | 4.839744045   | 0 | 1 | 0 | st  |
| 2032 | 1 | 5 | 2.100000  | 1.784418745 | 16.133504185  | 4.971778212   | 0 | 0 | 0 | st  |
| 2033 | 1 | 1 | 1.575000  | 2.564951898 | -18.710342674 | 14.792747493  | 0 | 1 | 0 | ao  |
| 2034 | 1 | 1 | 1.575000  | 5.152091886 | -18.720367335 | 10.569647493  | 0 | 1 | 0 | ao  |
| 2035 | 1 | 1 | 1.575000  | 0.010475843 | -18.727185446 | 16.141210963  | 0 | 1 | 0 | ao  |
| 2036 | 1 | 1 | 1.575000  | 2.597479300 | -18.737173074 | 11.918102305  | 0 | 1 | 0 | ao  |
| 2037 | 1 | 2 | 0.425000  | 3.116355855 | -17.343036629 | 9.911451013   | 0 | 1 | 0 | ho  |
| 2038 | 1 | 2 | 0.425000  | 0.545922528 | -17.244695847 | 14.180912462  | 0 | 1 | 0 | ho  |
| 2039 | 1 | 2 | 0.425000  | 4.617664323 | 17.337409910  | 12.532201022  | 0 | 0 | 0 | ho  |
| 2040 | 1 | 2 | 0.425000  | 2.046067415 | 17.431442661  | 16.799025190  | 0 | 0 | 0 | ho  |
| 2041 | 1 | 3 | -1.050000 | 1.974320767 | 17.750750650  | 13.358380749  | 0 | 0 | 0 | ob  |
| 2042 | 1 | 3 | -1.050000 | 1.589283948 | 17.758665989  | 10.673429865  | 0 | 0 | 0 | ob  |
| 2043 | 1 | 3 | -1.050000 | 4.162820410 | 17.765964470  | 14.907177115  | 0 | 0 | 0 | ob  |
| 2044 | 1 | 3 | -1.050000 | 2.219750450 | 15.513870541  | 11.985412584  | 0 | 0 | 0 | ob  |
| 2045 | 1 | 6 | -0.950000 | 4.804343942 | 15.514671910  | -17.594048299 | 0 | 0 | 0 | oht |
| 2046 | 1 | 3 | -1.050000 | 0.606605783 | -17.660039116 | 9.130033991   | 0 | 1 | 0 | ob  |
| 2047 | 1 | 3 | -1.050000 | 3.188175495 | -17.661884485 | 13.352451743  | 0 | 1 | 0 | ob  |
| 2048 | 1 | 3 | -1.050000 | 2.355525134 | -15.428256828 | 12.176747445  | 0 | 1 | 0 | ob  |
| 2049 | 1 | 3 | -1.050000 | 4.928942666 | -15.424740091 | 16.405069793  | 0 | 1 | 0 | ob  |
| 2050 | 1 | 3 | -1.050000 | 0.358599510 | -15.425454729 | 10.506543562  | 0 | 1 | 0 | ob  |
| 2051 | 1 | 3 | -1.050000 | 2.943159518 | -15.425177613 | 14.725300930  | 0 | 1 | 0 | ob  |
| 2052 | 1 | 4 | -0.950000 | 0.973817447 | -17.738142618 | 14.905911812  | 0 | 1 | 0 | oh  |
| 2053 | 1 | 4 | -0.950000 | 3.559070440 | -17.750835269 | 10.678860000  | 0 | 1 | 0 | oh  |
| 2054 | 1 | 3 | -1.050000 | 2.368990946 | -15.701706791 | 8.867196118   | 0 | 1 | 0 | ob  |
| 2055 | 1 | 3 | -1.050000 | 4.963275993 | -15.717859730 | 13.098538892  | 0 | 1 | 0 | ob  |
| 2056 | 1 | 7 | -0.950000 | 1.603365723 | 17.839710067  | 16.031829270  | 0 | 0 | 0 | oho |
| 2057 | 1 | 3 | -1.050000 | 0.199951485 | 15.806346611  | 13.612516698  | 0 | 0 | 0 | ob  |
| 2058 | 1 | 4 | -0.950000 | 4.188976468 | 17.827436781  | 11.805359607  | 0 | 0 | 0 | oh  |
| 2059 | 1 | 3 | -1.050000 | 2.793669734 | 15.790522954  | 9.393964434   | 0 | 0 | 0 | ob  |
| 2060 | 1 | 3 | -1.050000 | 0.999937272 | -17.677041387 | 11.803442278  | 0 | 1 | 0 | ob  |
| 2061 | 1 | 3 | -1.050000 | 3.573485134 | -17.669834762 | 16.037475661  | 0 | 1 | 0 | ob  |
| 2062 | 1 | 3 | -1.050000 | 4.555837623 | 17.749076708  | 9.131339972   | 0 | 0 | 0 | ob  |
| 2063 | 1 | 3 | -1.050000 | 0.233734585 | 15.513833707  | 10.305776368  | 0 | 0 | 0 | ob  |
| 2064 | 1 | 3 | -1.050000 | 2.807687271 | 15.517136431  | 14.533957725  | 0 | 0 | 0 | ob  |
| 2065 | 1 | 5 | 2.100000  | 0.877003477 | -16.047600962 | 11.902086522  | 0 | 1 | 0 | st  |
| 2066 | 1 | 5 | 2.100000  | 3.449029217 | -16.038619659 | 16.129979551  | 0 | 1 | 0 | st  |
| 2067 | 1 | 5 | 2.100000  | 4.372376051 | 16.130136608  | 9.193674984   | 0 | 0 | 0 | st  |
| 2068 | 1 | 5 | 2.100000  | 1.713733961 | 16.127439967  | 10.580878354  | 0 | 0 | 0 | st  |
| 2069 | 1 | 5 | 2.100000  | 4.286150250 | 16.136517420  | 14.808624273  | 0 | 0 | 0 | st  |
| 2070 | 1 | 5 | 2.100000  | 0.790278839 | -16.041150089 | 9.067561151   | 0 | 1 | 0 | st  |
| 2071 | 1 | 5 | 2.100000  | 3.378672668 | -16.044802575 | 13.289344045  | 0 | 1 | 0 | st  |
| 2072 | 1 | 5 | 2.100000  | 1.784418745 | 16.133504185  | 13.421378212  | 0 | 0 | 0 | st  |
| 2073 | 1 | 1 | 1.575000  | 2.564951898 | -18.710342674 | -10.556052507 | 0 | 1 | 0 | ao  |
| 2074 | 1 | 1 | 1.575000  | 5.152091886 | -18.720367335 | -14.779152507 | 0 | 1 | 0 | ao  |
| 2075 | 1 | 1 | 1.575000  | 0.010475843 | -18.727185446 | -9.207589037  | 0 | 1 | 0 | ao  |
| 2076 | 1 | 1 | 1.575000  | 2.597479300 | -18.737173074 | -13.430697695 | 0 | 1 | 0 | ao  |
| 2077 | 1 | 2 | 0.425000  | 3.116355855 | -17.343036629 | -15.437348987 | 0 | 1 | 0 | ho  |
| 2078 | 1 | 2 | 0.425000  | 0.545922528 | -17.244695847 | -11.167887538 | 0 | 1 | 0 | ho  |
| 2079 | 1 | 2 | 0.425000  | 4.617664323 | 17.337409910  | -12.816598978 | 0 | 0 | 0 | ho  |
| 2080 | 1 | 2 | 0.425000  | 2.046067415 | 17.431442661  | -8.549774810  | 0 | 0 | 0 | ho  |
| 2081 | 1 | 3 | -1.050000 | 1.974320767 | 17.750750650  | -11.990419251 | 0 | 0 | 0 | ob  |
| 2082 | 1 | 3 | -1.050000 | 1.589283948 | 17.758665989  | -14.675370135 | 0 | 0 | 0 | ob  |
| 2083 | 1 | 3 | -1.050000 | 4.162820410 | 17.765964470  | -10.441622885 | 0 | 0 | 0 | ob  |
| 2084 | 1 | 3 | -1.050000 | 2.219750450 | 15.513870541  | -13.363387416 | 0 | 0 | 0 | ob  |
| 2085 | 1 | 3 | -1.050000 | 4.804343942 | 15.514671910  | -9.144448299  | 0 | 0 | 0 | ob  |
| 2086 | 1 | 3 | -1.050000 | 0.606605783 | -17.660039116 | 17.579633991  | 0 | 1 | 0 | ob  |
| 2087 | 1 | 3 | -1.050000 | 3.188175495 | -17.661884485 | -11.996348257 | 0 | 1 | 0 | ob  |
| 2088 | 1 | 3 | -1.050000 | 2.355525134 | -15.428256828 | -13.172052555 | 0 | 1 | 0 | ob  |
| 2089 | 1 | 3 | -1.050000 | 4.928942666 | -15.424740091 | -8.943730207  | 0 | 1 | 0 | ob  |
| 2090 | 1 | 6 | -0.950000 | 0.358599510 | -15.425454729 | 18.956143562  | 0 | 1 | 0 | oht |
| 2091 | 1 | 3 | -1.050000 | 2.943159518 | -15.425177613 | -10.623499070 | 0 | 1 | 0 | ob  |

|      |   |   |           |              |               |               |   |   |   |   |     |
|------|---|---|-----------|--------------|---------------|---------------|---|---|---|---|-----|
| 2092 | 1 | 4 | -0.950000 | 0.973817447  | -17.738142618 | -10.442888188 | 0 | 1 | 0 | # | oh  |
| 2093 | 1 | 7 | -0.950000 | 3.559070440  | -17.750835269 | -14.669940000 | 0 | 1 | 0 | # | oho |
| 2094 | 1 | 3 | -1.050000 | 2.368990946  | -15.701706791 | 17.316796118  | 0 | 1 | 0 | # | ob  |
| 2095 | 1 | 3 | -1.050000 | 4.963275993  | -15.717859730 | -12.250261108 | 0 | 1 | 0 | # | ob  |
| 2096 | 1 | 4 | -0.950000 | 1.603365723  | 17.839710067  | -9.316970730  | 0 | 0 | 0 | # | oh  |
| 2097 | 1 | 3 | -1.050000 | 0.199951485  | 15.806346611  | -11.736283302 | 0 | 0 | 0 | # | ob  |
| 2098 | 1 | 4 | -0.950000 | 4.188976468  | 17.827436781  | -13.543440393 | 0 | 0 | 0 | # | oh  |
| 2099 | 1 | 3 | -1.050000 | 2.793669734  | 15.790522954  | -15.954835566 | 0 | 0 | 0 | # | ob  |
| 2100 | 1 | 3 | -1.050000 | 0.999937272  | -17.677041387 | -13.545357722 | 0 | 1 | 0 | # | ob  |
| 2101 | 1 | 3 | -1.050000 | 3.573485134  | -17.669834762 | -9.311324339  | 0 | 1 | 0 | # | ob  |
| 2102 | 1 | 3 | -1.050000 | 4.555837623  | 17.749076708  | -16.217460028 | 0 | 0 | 0 | # | ob  |
| 2103 | 1 | 3 | -1.050000 | 0.233734585  | 15.513833707  | -15.043023632 | 0 | 0 | 0 | # | ob  |
| 2104 | 1 | 3 | -1.050000 | 2.807687271  | 15.517136431  | -10.814842275 | 0 | 0 | 0 | # | ob  |
| 2105 | 1 | 5 | 2.100000  | 0.877003477  | -16.047600962 | -13.446713478 | 0 | 1 | 0 | # | st  |
| 2106 | 1 | 5 | 2.100000  | 3.449029217  | -16.038619659 | -9.218820449  | 0 | 1 | 0 | # | st  |
| 2107 | 1 | 5 | 2.100000  | 4.372376051  | 16.130136608  | -16.155125016 | 0 | 0 | 0 | # | st  |
| 2108 | 1 | 5 | 2.100000  | 1.713733961  | 16.127439967  | -14.767921646 | 0 | 0 | 0 | # | st  |
| 2109 | 1 | 5 | 2.100000  | 4.286150250  | 16.136517420  | -10.540175727 | 0 | 0 | 0 | # | st  |
| 2110 | 1 | 5 | 2.100000  | 0.790278839  | -16.041150089 | 17.517161151  | 0 | 1 | 0 | # | st  |
| 2111 | 1 | 5 | 2.100000  | 3.378672668  | -16.044802575 | -12.059455955 | 0 | 1 | 0 | # | st  |
| 2112 | 1 | 5 | 2.100000  | 1.784418745  | 16.133504185  | -11.927421788 | 0 | 0 | 0 | # | st  |
| 2113 | 1 | 1 | 1.575000  | 2.564951898  | -18.710342674 | -2.106452507  | 0 | 1 | 0 | # | ao  |
| 2114 | 1 | 1 | 1.575000  | 5.152091886  | -18.720367335 | -6.329552507  | 0 | 1 | 0 | # | ao  |
| 2115 | 1 | 1 | 1.575000  | 0.010475843  | -18.727185446 | -0.757989037  | 0 | 1 | 0 | # | ao  |
| 2116 | 1 | 1 | 1.575000  | 2.597479300  | -18.737173074 | -4.981097695  | 0 | 1 | 0 | # | ao  |
| 2117 | 1 | 2 | 0.425000  | 3.116355855  | -17.343036629 | -6.987748987  | 0 | 1 | 0 | # | ho  |
| 2118 | 1 | 2 | 0.425000  | 0.545922528  | -17.244695847 | -2.718287538  | 0 | 1 | 0 | # | ho  |
| 2119 | 1 | 2 | 0.425000  | 4.617664323  | 17.337409910  | -4.366998978  | 0 | 0 | 0 | # | ho  |
| 2120 | 1 | 2 | 0.425000  | 2.046067415  | 17.431442661  | -0.100174810  | 0 | 0 | 0 | # | ho  |
| 2121 | 1 | 3 | -1.050000 | 1.974320767  | 17.750750650  | -3.540819251  | 0 | 0 | 0 | # | ob  |
| 2122 | 1 | 3 | -1.050000 | 1.589283948  | 17.758665989  | -6.225770135  | 0 | 0 | 0 | # | ob  |
| 2123 | 1 | 3 | -1.050000 | 4.162820410  | 17.765964470  | -1.992022885  | 0 | 0 | 0 | # | ob  |
| 2124 | 1 | 3 | -1.050000 | 2.219750450  | 15.513870541  | -4.913787416  | 0 | 0 | 0 | # | ob  |
| 2125 | 1 | 3 | -1.050000 | 4.804343942  | 15.514671910  | -0.694848299  | 0 | 0 | 0 | # | ob  |
| 2126 | 1 | 3 | -1.050000 | 0.606605783  | -17.660039116 | -7.769166009  | 0 | 1 | 0 | # | ob  |
| 2127 | 1 | 3 | -1.050000 | 3.188175495  | -17.661884485 | -3.546748257  | 0 | 1 | 0 | # | ob  |
| 2128 | 1 | 3 | -1.050000 | 2.355525134  | -15.428256828 | -4.722452555  | 0 | 1 | 0 | # | ob  |
| 2129 | 1 | 3 | -1.050000 | 4.928942666  | -15.424740091 | -0.494130207  | 0 | 1 | 0 | # | ob  |
| 2130 | 1 | 3 | -1.050000 | 0.358599510  | -15.425454729 | -6.392656438  | 0 | 1 | 0 | # | ob  |
| 2131 | 1 | 3 | -1.050000 | 2.943159518  | -15.425177613 | -2.173899070  | 0 | 1 | 0 | # | ob  |
| 2132 | 1 | 4 | -0.950000 | 0.973817447  | -17.738142618 | -1.993288188  | 0 | 1 | 0 | # | oh  |
| 2133 | 1 | 4 | -0.950000 | 3.559070440  | -17.750835269 | -6.220340000  | 0 | 1 | 0 | # | oh  |
| 2134 | 1 | 3 | -1.050000 | 2.368990946  | -15.701706791 | -8.032003882  | 0 | 1 | 0 | # | ob  |
| 2135 | 1 | 3 | -1.050000 | 4.963275993  | -15.717859730 | -3.800661108  | 0 | 1 | 0 | # | ob  |
| 2136 | 1 | 4 | -0.950000 | 1.603365723  | 17.839710067  | -0.867370730  | 0 | 0 | 0 | # | oh  |
| 2137 | 1 | 3 | -1.050000 | 0.199951485  | 15.806346611  | -3.286683302  | 0 | 0 | 0 | # | ob  |
| 2138 | 1 | 4 | -0.950000 | 4.188976468  | 17.827436781  | -5.093840393  | 0 | 0 | 0 | # | oh  |
| 2139 | 1 | 3 | -1.050000 | 2.793669734  | 15.790522954  | -7.505235566  | 0 | 0 | 0 | # | ob  |
| 2140 | 1 | 3 | -1.050000 | 0.999937272  | -17.677041387 | -5.095757722  | 0 | 1 | 0 | # | ob  |
| 2141 | 1 | 3 | -1.050000 | 3.573485134  | -17.669834762 | -0.861724339  | 0 | 1 | 0 | # | ob  |
| 2142 | 1 | 3 | -1.050000 | 4.555837623  | 17.749076708  | -7.767860028  | 0 | 0 | 0 | # | ob  |
| 2143 | 1 | 3 | -1.050000 | 0.233734585  | 15.513833707  | -6.593423632  | 0 | 0 | 0 | # | ob  |
| 2144 | 1 | 3 | -1.050000 | 2.807687271  | 15.517136431  | -2.365242275  | 0 | 0 | 0 | # | ob  |
| 2145 | 1 | 5 | 2.100000  | 0.877003477  | -16.047600962 | -4.997113478  | 0 | 1 | 0 | # | st  |
| 2146 | 1 | 5 | 2.100000  | 3.449029217  | -16.038619659 | -0.769220449  | 0 | 1 | 0 | # | st  |
| 2147 | 1 | 5 | 2.100000  | 4.372376051  | 16.130136608  | -7.705525016  | 0 | 0 | 0 | # | st  |
| 2148 | 1 | 5 | 2.100000  | 1.713733961  | 16.127439967  | -6.318321646  | 0 | 0 | 0 | # | st  |
| 2149 | 1 | 5 | 2.100000  | 4.286150250  | 16.136517420  | -2.090575727  | 0 | 0 | 0 | # | st  |
| 2150 | 1 | 5 | 2.100000  | 0.790278839  | -16.041150089 | -7.831638849  | 0 | 1 | 0 | # | st  |
| 2151 | 1 | 5 | 2.100000  | 3.378672668  | -16.044802575 | -3.609855955  | 0 | 1 | 0 | # | st  |
| 2152 | 1 | 5 | 2.100000  | 1.784418745  | 16.133504185  | -3.477821788  | 0 | 0 | 0 | # | st  |
| 2153 | 1 | 6 | -0.950000 | 4.846051183  | 16.134128849  | 16.634714390  | 0 | 0 | 0 | # | oht |
| 2154 | 1 | 6 | -0.950000 | 0.590206465  | -15.806715341 | -15.319631379 | 0 | 1 | 0 | # | oht |
| 2155 | 1 | 2 | 0.425000  | 0.429963167  | -15.689544923 | -16.411736324 | 0 | 1 | 0 | # | ho  |
| 2156 | 1 | 2 | 0.425000  | 5.010789943  | 15.784241026  | -18.650841835 | 0 | 0 | 0 | # | ho  |
| 2157 | 1 | 2 | 0.425000  | 0.435438959  | -15.518101635 | 20.059598264  | 0 | 1 | 0 | # | ho  |
| 2158 | 1 | 2 | 0.425000  | 4.457833436  | 16.234513767  | 17.669755394  | 0 | 0 | 0 | # | ho  |
| 2159 | 1 | 1 | 1.575000  | 7.727751898  | -18.710342674 | 6.343147493   | 0 | 1 | 0 | # | ao  |
| 2160 | 1 | 1 | 1.575000  | 10.314891886 | -18.720367335 | 2.120047493   | 0 | 1 | 0 | # | ao  |
| 2161 | 1 | 1 | 1.575000  | 5.173275843  | -18.727185446 | 7.691610963   | 0 | 1 | 0 | # | ao  |
| 2162 | 1 | 1 | 1.575000  | 7.760279300  | -18.737173074 | 3.468502305   | 0 | 1 | 0 | # | ao  |
| 2163 | 1 | 2 | 0.425000  | 8.279155855  | -17.343036629 | 1.461851013   | 0 | 1 | 0 | # | ho  |
| 2164 | 1 | 2 | 0.425000  | 5.708722528  | -17.244695847 | 5.731312462   | 0 | 1 | 0 | # | ho  |
| 2165 | 1 | 2 | 0.425000  | 9.780464323  | 17.337409910  | 4.082601022   | 0 | 0 | 0 | # | ho  |
| 2166 | 1 | 2 | 0.425000  | 7.208867415  | 17.431442661  | 8.349425190   | 0 | 0 | 0 | # | ho  |
| 2167 | 1 | 3 | -1.050000 | 7.137120767  | 17.750750650  | 4.908780749   | 0 | 0 | 0 | # | ob  |
| 2168 | 1 | 3 | -1.050000 | 6.752083948  | 17.758665989  | 2.223829865   | 0 | 0 | 0 | # | ob  |
| 2169 | 1 | 3 | -1.050000 | 9.325620410  | 17.765964470  | 6.457577115   | 0 | 0 | 0 | # | ob  |
| 2170 | 1 | 3 | -1.050000 | 7.382550450  | 15.513870541  | 3.535812584   | 0 | 0 | 0 | # | ob  |
| 2171 | 1 | 3 | -1.050000 | 9.967143942  | 15.514671910  | 7.754751701   | 0 | 0 | 0 | # | ob  |
| 2172 | 1 | 3 | -1.050000 | 5.769405783  | -17.660039116 | 0.680433991   | 0 | 1 | 0 | # | ob  |
| 2173 | 1 | 3 | -1.050000 | 8.350975495  | -17.661884485 | 4.902851743   | 0 | 1 | 0 | # | ob  |
| 2174 | 1 | 3 | -1.050000 | 7.518325134  | -15.428256828 | 3.727147445   | 0 | 1 | 0 | # | ob  |
| 2175 | 1 | 3 | -1.050000 | 10.091742666 | -15.424740091 | 7.955469793   | 0 | 1 | 0 | # | ob  |
| 2176 | 1 | 3 | -1.050000 | 5.521399510  | -15.425454729 | 2.056943562   | 0 | 1 | 0 | # | ob  |
| 2177 | 1 | 3 | -1.050000 | 8.105959518  | -15.425177613 | 6.275700930   | 0 | 1 | 0 | # | ob  |
| 2178 | 1 | 4 | -0.950000 | 6.136617447  | -17.738142618 | 6.456311812   | 0 | 1 | 0 | # | oh  |
| 2179 | 1 | 4 | -0.950000 | 8.721870440  | -17.750835269 | 2.229260000   | 0 | 1 | 0 | # | oh  |
| 2180 | 1 | 3 | -1.050000 | 7.531790946  | -15.701706791 | 0.417596118   | 0 | 1 | 0 | # | ob  |
| 2181 | 1 | 3 | -1.050000 | 10.126075993 | -15.717859730 | 4.648938892   | 0 | 1 | 0 | # | ob  |
| 2182 | 1 | 4 | -0.950000 | 6.766165723  | 17.839710067  | 7.582229270   | 0 | 0 | 0 | # | oh  |
| 2183 | 1 | 3 | -1.050000 | 5.362751485  | 15.806346611  | 5.162916698   | 0 | 0 | 0 | # | ob  |
| 2184 | 1 | 4 | -0.950000 | 9.351776468  | 17.827436781  | 3.355759607   | 0 | 0 | 0 | # | oh  |

|      |   |   |           |              |               |               |   |   |   |     |
|------|---|---|-----------|--------------|---------------|---------------|---|---|---|-----|
| 2185 | 1 | 3 | -1.050000 | 7.956469734  | 15.790522954  | 0.944364434   | 0 | 0 | 0 | ob  |
| 2186 | 1 | 3 | -1.050000 | 6.162737272  | -17.677041387 | 3.353842278   | 0 | 1 | 0 | ob  |
| 2187 | 1 | 3 | -1.050000 | 8.736285134  | -17.669834762 | 7.587875661   | 0 | 1 | 0 | ob  |
| 2188 | 1 | 3 | -1.050000 | 9.718637623  | 17.749076708  | 0.681739972   | 0 | 0 | 0 | ob  |
| 2189 | 1 | 3 | -1.050000 | 5.396534585  | 15.513833707  | 1.856176368   | 0 | 0 | 0 | ob  |
| 2190 | 1 | 3 | -1.050000 | 7.970487271  | 15.517136431  | 6.084357725   | 0 | 0 | 0 | ob  |
| 2191 | 1 | 5 | 2.100000  | 6.039803477  | -16.047600962 | 3.452486522   | 0 | 1 | 0 | st  |
| 2192 | 1 | 5 | 2.100000  | 8.611829217  | -16.038619659 | 7.680379551   | 0 | 1 | 0 | st  |
| 2193 | 1 | 5 | 2.100000  | 9.535176051  | 16.130136608  | 0.744074984   | 0 | 0 | 0 | st  |
| 2194 | 1 | 5 | 2.100000  | 6.876533961  | 16.127439967  | 2.131278354   | 0 | 0 | 0 | st  |
| 2195 | 1 | 5 | 2.100000  | 9.448950250  | 16.136517420  | 6.359024273   | 0 | 0 | 0 | st  |
| 2196 | 1 | 5 | 2.100000  | 5.953078839  | -16.041150089 | 0.617961151   | 0 | 1 | 0 | st  |
| 2197 | 1 | 5 | 2.100000  | 8.541472668  | -16.044802575 | 4.839744405   | 0 | 1 | 0 | st  |
| 2198 | 1 | 5 | 2.100000  | 6.947218745  | 16.133504185  | 4.971778212   | 0 | 0 | 0 | st  |
| 2199 | 1 | 1 | 1.575000  | 7.727751898  | -18.710342674 | 14.792747493  | 0 | 1 | 0 | ao  |
| 2200 | 1 | 1 | 1.575000  | 10.314891886 | -18.720367335 | 10.569647493  | 0 | 1 | 0 | ao  |
| 2201 | 1 | 1 | 1.575000  | 5.173275843  | -18.727185446 | 16.141210963  | 0 | 1 | 0 | ao  |
| 2202 | 1 | 1 | 1.575000  | 7.760279300  | -18.737173074 | 11.918102305  | 0 | 1 | 0 | ao  |
| 2203 | 1 | 2 | 0.425000  | 8.279155855  | -17.343036629 | 9.911451013   | 0 | 1 | 0 | ho  |
| 2204 | 1 | 2 | 0.425000  | 5.708722528  | -17.244695847 | 14.180912462  | 0 | 1 | 0 | ho  |
| 2205 | 1 | 2 | 0.425000  | 9.780464323  | 17.337409910  | 12.532201022  | 0 | 0 | 0 | ho  |
| 2206 | 1 | 2 | 0.425000  | 7.208867415  | 17.431442661  | 16.799025190  | 0 | 0 | 0 | ho  |
| 2207 | 1 | 3 | -1.050000 | 7.137120767  | 17.750750650  | 13.358380749  | 0 | 0 | 0 | ob  |
| 2208 | 1 | 3 | -1.050000 | 6.752083948  | 17.758665989  | 10.673429865  | 0 | 0 | 0 | ob  |
| 2209 | 1 | 3 | -1.050000 | 9.325620410  | 17.765964470  | 14.907177115  | 0 | 0 | 0 | ob  |
| 2210 | 1 | 3 | -1.050000 | 7.382550450  | 15.513870541  | 11.985412584  | 0 | 0 | 0 | ob  |
| 2211 | 1 | 6 | -0.950000 | 9.967143942  | 15.514671910  | -17.594048299 | 0 | 0 | 0 | oht |
| 2212 | 1 | 3 | -1.050000 | 5.769405783  | -17.660039116 | 9.130033991   | 0 | 1 | 0 | ob  |
| 2213 | 1 | 3 | -1.050000 | 8.350975495  | -17.661884485 | 13.352451743  | 0 | 1 | 0 | ob  |
| 2214 | 1 | 3 | -1.050000 | 7.518325134  | -15.428256828 | 12.176747445  | 0 | 1 | 0 | ob  |
| 2215 | 1 | 3 | -1.050000 | 10.091742666 | -15.424740091 | 16.405069793  | 0 | 1 | 0 | ob  |
| 2216 | 1 | 3 | -1.050000 | 5.521399510  | -15.425454729 | 10.506543562  | 0 | 1 | 0 | ob  |
| 2217 | 1 | 3 | -1.050000 | 8.105959518  | -15.425177613 | 14.725300930  | 0 | 1 | 0 | ob  |
| 2218 | 1 | 4 | -0.950000 | 6.136617447  | -17.738142618 | 14.905911812  | 0 | 1 | 0 | oh  |
| 2219 | 1 | 4 | -0.950000 | 8.721870440  | -17.750835269 | 10.678860000  | 0 | 1 | 0 | oh  |
| 2220 | 1 | 3 | -1.050000 | 7.531790946  | -15.701706791 | 8.867196118   | 0 | 1 | 0 | ob  |
| 2221 | 1 | 3 | -1.050000 | 10.126075993 | -15.717859730 | 13.098538892  | 0 | 1 | 0 | ob  |
| 2222 | 1 | 7 | -0.950000 | 6.766165723  | 17.839710067  | 16.031829270  | 0 | 0 | 0 | oho |
| 2223 | 1 | 3 | -1.050000 | 5.362751485  | 15.806346611  | 13.612516698  | 0 | 0 | 0 | ob  |
| 2224 | 1 | 4 | -0.950000 | 9.351776468  | 17.827436781  | 11.805359607  | 0 | 0 | 0 | ob  |
| 2225 | 1 | 3 | -1.050000 | 7.956469734  | 15.790522954  | 9.393964434   | 0 | 0 | 0 | ob  |
| 2226 | 1 | 3 | -1.050000 | 6.162737272  | -17.677041387 | 11.803442278  | 0 | 1 | 0 | ob  |
| 2227 | 1 | 3 | -1.050000 | 8.736285134  | -17.669834762 | 16.037475661  | 0 | 1 | 0 | ob  |
| 2228 | 1 | 3 | -1.050000 | 9.718637623  | 17.749076708  | 9.131339972   | 0 | 0 | 0 | ob  |
| 2229 | 1 | 3 | -1.050000 | 5.396534585  | 15.513833707  | 10.305776368  | 0 | 0 | 0 | ob  |
| 2230 | 1 | 3 | -1.050000 | 7.970487271  | 15.517136431  | 14.533957725  | 0 | 0 | 0 | ob  |
| 2231 | 1 | 5 | 2.100000  | 6.039803477  | -16.047600962 | 11.902086522  | 0 | 1 | 0 | st  |
| 2232 | 1 | 5 | 2.100000  | 8.611829217  | -16.038619659 | 16.129979551  | 0 | 1 | 0 | st  |
| 2233 | 1 | 5 | 2.100000  | 9.535176051  | 16.130136608  | 9.193674984   | 0 | 0 | 0 | st  |
| 2234 | 1 | 5 | 2.100000  | 6.876533961  | 16.127439967  | 10.580878354  | 0 | 0 | 0 | st  |
| 2235 | 1 | 5 | 2.100000  | 9.448950250  | 16.136517420  | 14.808624273  | 0 | 0 | 0 | st  |
| 2236 | 1 | 5 | 2.100000  | 5.953078839  | -16.041150089 | 9.067561151   | 0 | 1 | 0 | st  |
| 2237 | 1 | 5 | 2.100000  | 8.541472668  | -16.044802575 | 13.289344045  | 0 | 1 | 0 | st  |
| 2238 | 1 | 5 | 2.100000  | 6.947218745  | 16.133504185  | 13.421378212  | 0 | 0 | 0 | st  |
| 2239 | 1 | 1 | 1.575000  | 7.727751898  | -18.710342674 | -10.556052507 | 0 | 1 | 0 | ao  |
| 2240 | 1 | 1 | 1.575000  | 10.314891886 | -18.720367335 | -14.779152507 | 0 | 1 | 0 | ao  |
| 2241 | 1 | 1 | 1.575000  | 5.173275843  | -18.727185446 | -9.207589037  | 0 | 1 | 0 | ao  |
| 2242 | 1 | 1 | 1.575000  | 7.760279300  | -18.737173074 | -13.430697695 | 0 | 1 | 0 | ao  |
| 2243 | 1 | 2 | 0.425000  | 8.279155855  | -17.343036629 | -15.437348987 | 0 | 1 | 0 | ho  |
| 2244 | 1 | 2 | 0.425000  | 5.708722528  | -17.244695847 | -11.167887538 | 0 | 1 | 0 | ho  |
| 2245 | 1 | 2 | 0.425000  | 9.780464323  | 17.337409910  | -12.816598978 | 0 | 0 | 0 | ho  |
| 2246 | 1 | 2 | 0.425000  | 7.208867415  | 17.431442661  | -8.549774810  | 0 | 0 | 0 | ho  |
| 2247 | 1 | 3 | -1.050000 | 7.137120767  | 17.750750650  | -11.990419251 | 0 | 0 | 0 | ob  |
| 2248 | 1 | 3 | -1.050000 | 6.752083948  | 17.758665989  | -14.675370135 | 0 | 0 | 0 | ob  |
| 2249 | 1 | 3 | -1.050000 | 9.325620410  | 17.765964470  | -10.441622885 | 0 | 0 | 0 | ob  |
| 2250 | 1 | 3 | -1.050000 | 7.382550450  | 15.513870541  | -13.363387416 | 0 | 0 | 0 | ob  |
| 2251 | 1 | 3 | -1.050000 | 9.967143942  | 15.514671910  | -9.144448299  | 0 | 0 | 0 | ob  |
| 2252 | 1 | 3 | -1.050000 | 5.769405783  | -17.660039116 | 17.579633991  | 0 | 1 | 0 | ob  |
| 2253 | 1 | 3 | -1.050000 | 8.350975495  | -17.661884485 | -11.996348257 | 0 | 1 | 0 | ob  |
| 2254 | 1 | 3 | -1.050000 | 7.518325134  | -15.428256828 | -13.172052555 | 0 | 1 | 0 | ob  |
| 2255 | 1 | 3 | -1.050000 | 10.091742666 | -15.424740091 | -8.943730207  | 0 | 1 | 0 | ob  |
| 2256 | 1 | 6 | -0.950000 | 5.521399510  | -15.425454729 | 18.956143562  | 0 | 1 | 0 | oht |
| 2257 | 1 | 3 | -1.050000 | 8.105959518  | -15.425177613 | -10.623499070 | 0 | 1 | 0 | ob  |
| 2258 | 1 | 4 | -0.950000 | 6.136617447  | -17.738142618 | -10.442888188 | 0 | 1 | 0 | oh  |
| 2259 | 1 | 7 | -0.950000 | 8.721870440  | -17.750835269 | -14.669940000 | 0 | 1 | 0 | oho |
| 2260 | 1 | 3 | -1.050000 | 7.531790946  | -15.701706791 | 17.316796118  | 0 | 1 | 0 | ob  |
| 2261 | 1 | 3 | -1.050000 | 10.126075993 | -15.717859730 | -12.250261108 | 0 | 1 | 0 | ob  |
| 2262 | 1 | 4 | -0.950000 | 6.766165723  | 17.839710067  | -9.316970730  | 0 | 0 | 0 | oh  |
| 2263 | 1 | 3 | -1.050000 | 5.362751485  | 15.806346611  | -11.736283302 | 0 | 0 | 0 | ob  |
| 2264 | 1 | 4 | -0.950000 | 9.351776468  | 17.827436781  | -13.543440393 | 0 | 0 | 0 | oh  |
| 2265 | 1 | 3 | -1.050000 | 7.956469734  | 15.790522954  | -15.954835566 | 0 | 0 | 0 | ob  |
| 2266 | 1 | 3 | -1.050000 | 6.162737272  | -17.677041387 | -13.545357722 | 0 | 1 | 0 | ob  |
| 2267 | 1 | 3 | -1.050000 | 8.736285134  | -17.669834762 | -9.311324339  | 0 | 1 | 0 | ob  |
| 2268 | 1 | 3 | -1.050000 | 9.718637623  | 17.749076708  | -16.217460028 | 0 | 0 | 0 | ob  |
| 2269 | 1 | 3 | -1.050000 | 5.396534585  | 15.513833707  | -15.043023632 | 0 | 0 | 0 | ob  |
| 2270 | 1 | 3 | -1.050000 | 7.970487271  | 15.517136431  | -10.814842275 | 0 | 0 | 0 | ob  |
| 2271 | 1 | 5 | 2.100000  | 6.039803477  | -16.047600962 | -13.446713478 | 0 | 1 | 0 | st  |
| 2272 | 1 | 5 | 2.100000  | 8.611829217  | -16.038619659 | -9.218820449  | 0 | 1 | 0 | st  |
| 2273 | 1 | 5 | 2.100000  | 9.535176051  | 16.130136608  | -16.155125016 | 0 | 0 | 0 | st  |
| 2274 | 1 | 5 | 2.100000  | 6.876533961  | 16.127439967  | -14.767921646 | 0 | 0 | 0 | st  |
| 2275 | 1 | 5 | 2.100000  | 9.448950250  | 16.136517420  | -10.540175727 | 0 | 0 | 0 | st  |
| 2276 | 1 | 5 | 2.100000  | 5.953078839  | -16.041150089 | 17.517161151  | 0 | 1 | 0 | st  |
| 2277 | 1 | 5 | 2.100000  | 8.541472668  | -16.044802575 | -12.059455955 | 0 | 1 | 0 | st  |

|      |   |   |           |              |               |               |   |   |   |   |     |
|------|---|---|-----------|--------------|---------------|---------------|---|---|---|---|-----|
| 2278 | 1 | 5 | 2.100000  | 6.947218745  | 16.133504185  | -11.927421788 | 0 | 0 | 0 | # | st  |
| 2279 | 1 | 1 | 1.575000  | 7.727751898  | -18.710342674 | -2.106452507  | 0 | 1 | 0 | # | ao  |
| 2280 | 1 | 1 | 1.575000  | 10.314891886 | -18.720367335 | -6.329552507  | 0 | 1 | 0 | # | ao  |
| 2281 | 1 | 1 | 1.575000  | 5.173275843  | -18.727185446 | -0.757989037  | 0 | 1 | 0 | # | ao  |
| 2282 | 1 | 1 | 1.575000  | 7.760279300  | -18.737173074 | -4.981097695  | 0 | 1 | 0 | # | ao  |
| 2283 | 1 | 2 | 0.425000  | 8.279155855  | -17.343036629 | -6.987748987  | 0 | 1 | 0 | # | ho  |
| 2284 | 1 | 2 | 0.425000  | 5.708722528  | -17.244695847 | -2.718287538  | 0 | 1 | 0 | # | ho  |
| 2285 | 1 | 2 | 0.425000  | 9.780464323  | 17.337409910  | -4.366998978  | 0 | 0 | 0 | # | ho  |
| 2286 | 1 | 2 | 0.425000  | 7.208867415  | 17.431442661  | -0.100174810  | 0 | 0 | 0 | # | ho  |
| 2287 | 1 | 3 | -1.050000 | 7.137120767  | 17.750750650  | -3.540819251  | 0 | 0 | 0 | # | ob  |
| 2288 | 1 | 3 | -1.050000 | 6.752083948  | 17.758665989  | -6.225770135  | 0 | 0 | 0 | # | ob  |
| 2289 | 1 | 3 | -1.050000 | 9.325620410  | 17.765964470  | -1.992022885  | 0 | 0 | 0 | # | ob  |
| 2290 | 1 | 3 | -1.050000 | 7.382550450  | 15.513870541  | -4.913787416  | 0 | 0 | 0 | # | ob  |
| 2291 | 1 | 3 | -1.050000 | 9.967143942  | 15.514671910  | -0.694848299  | 0 | 0 | 0 | # | ob  |
| 2292 | 1 | 3 | -1.050000 | 5.769405783  | -17.660039116 | -7.769166009  | 0 | 1 | 0 | # | ob  |
| 2293 | 1 | 3 | -1.050000 | 8.350975495  | -17.661884485 | -3.546748257  | 0 | 1 | 0 | # | ob  |
| 2294 | 1 | 3 | -1.050000 | 7.518325134  | -15.428256828 | -4.722452555  | 0 | 1 | 0 | # | ob  |
| 2295 | 1 | 3 | -1.050000 | 10.091742666 | -15.424740091 | -0.494130207  | 0 | 1 | 0 | # | ob  |
| 2296 | 1 | 3 | -1.050000 | 5.521399510  | -15.425454729 | -6.392656438  | 0 | 1 | 0 | # | ob  |
| 2297 | 1 | 3 | -1.050000 | 8.105959518  | -15.425177613 | -2.173899070  | 0 | 1 | 0 | # | ob  |
| 2298 | 1 | 4 | -0.950000 | 6.136617447  | -17.738142618 | -1.993288188  | 0 | 1 | 0 | # | oh  |
| 2299 | 1 | 4 | -0.950000 | 8.721870440  | -17.750835269 | -6.220340000  | 0 | 1 | 0 | # | oh  |
| 2300 | 1 | 3 | -1.050000 | 7.531790946  | -15.701706791 | -8.032003882  | 0 | 1 | 0 | # | ob  |
| 2301 | 1 | 3 | -1.050000 | 10.126075993 | -15.717859730 | -3.800661108  | 0 | 1 | 0 | # | ob  |
| 2302 | 1 | 4 | -0.950000 | 6.766165723  | 17.839710067  | -0.867370730  | 0 | 0 | 0 | # | oh  |
| 2303 | 1 | 3 | -1.050000 | 5.362751485  | 15.806346611  | -3.286683302  | 0 | 0 | 0 | # | ob  |
| 2304 | 1 | 4 | -0.950000 | 9.351776468  | 17.827436781  | -5.093840393  | 0 | 0 | 0 | # | oh  |
| 2305 | 1 | 3 | -1.050000 | 7.956469734  | 15.790522954  | -7.505235566  | 0 | 0 | 0 | # | ob  |
| 2306 | 1 | 3 | -1.050000 | 6.162737272  | -17.677041387 | -5.095757722  | 0 | 1 | 0 | # | ob  |
| 2307 | 1 | 3 | -1.050000 | 8.736285134  | -17.669834762 | -0.861724339  | 0 | 1 | 0 | # | ob  |
| 2308 | 1 | 3 | -1.050000 | 9.718637623  | 17.749076708  | -7.767860028  | 0 | 0 | 0 | # | ob  |
| 2309 | 1 | 3 | -1.050000 | 5.396534585  | 15.513833707  | -6.593423632  | 0 | 0 | 0 | # | ob  |
| 2310 | 1 | 3 | -1.050000 | 7.970487271  | 15.517136431  | -2.365242275  | 0 | 0 | 0 | # | ob  |
| 2311 | 1 | 5 | 2.100000  | 6.039803477  | -16.047600962 | -4.997113478  | 0 | 1 | 0 | # | st  |
| 2312 | 1 | 5 | 2.100000  | 8.611829217  | -16.038619659 | -0.769220449  | 0 | 1 | 0 | # | st  |
| 2313 | 1 | 5 | 2.100000  | 9.535176051  | 16.130136608  | -7.705525016  | 0 | 0 | 0 | # | st  |
| 2314 | 1 | 5 | 2.100000  | 6.876533961  | 16.127439967  | -6.318321646  | 0 | 0 | 0 | # | st  |
| 2315 | 1 | 5 | 2.100000  | 9.448950250  | 16.136517420  | -2.090575727  | 0 | 0 | 0 | # | st  |
| 2316 | 1 | 5 | 2.100000  | 5.953078839  | -16.041150089 | -7.831638849  | 0 | 1 | 0 | # | st  |
| 2317 | 1 | 5 | 2.100000  | 8.541472668  | -16.044802575 | -3.609855955  | 0 | 1 | 0 | # | st  |
| 2318 | 1 | 5 | 2.100000  | 6.947218745  | 16.133504185  | -3.477821788  | 0 | 0 | 0 | # | st  |
| 2319 | 1 | 6 | -0.950000 | 10.008851183 | 16.134128849  | 16.634714390  | 0 | 0 | 0 | # | oht |
| 2320 | 1 | 6 | -0.950000 | 5.753006465  | -15.806715341 | -15.319631379 | 0 | 1 | 0 | # | oht |
| 2321 | 1 | 2 | 0.425000  | 5.592763167  | -15.689544923 | -16.411736324 | 0 | 1 | 0 | # | ho  |
| 2322 | 1 | 2 | 0.425000  | 10.173589943 | 15.784241026  | -18.650841835 | 0 | 0 | 0 | # | ho  |
| 2323 | 1 | 2 | 0.425000  | 5.598238959  | -15.518101635 | 20.059598264  | 0 | 1 | 0 | # | ho  |
| 2324 | 1 | 2 | 0.425000  | 9.620633436  | 16.234513767  | 17.669755394  | 0 | 0 | 0 | # | ho  |
| 2325 | 1 | 1 | 1.575000  | 12.890551898 | -18.710342674 | 6.343147493   | 0 | 1 | 0 | # | ao  |
| 2326 | 1 | 1 | 1.575000  | 15.477691886 | -18.720367335 | 2.120047493   | 0 | 1 | 0 | # | ao  |
| 2327 | 1 | 1 | 1.575000  | 10.336075843 | -18.727185446 | 7.691610963   | 0 | 1 | 0 | # | ao  |
| 2328 | 1 | 1 | 1.575000  | 12.923079300 | -18.737173074 | 3.468502305   | 0 | 1 | 0 | # | ao  |
| 2329 | 1 | 2 | 0.425000  | 13.441955855 | -17.343036629 | 1.461851013   | 0 | 1 | 0 | # | ho  |
| 2330 | 1 | 2 | 0.425000  | 10.871522528 | -17.244695847 | 5.731312462   | 0 | 1 | 0 | # | ho  |
| 2331 | 1 | 2 | 0.425000  | 14.943264323 | 17.337409910  | 4.082601022   | 0 | 0 | 0 | # | ho  |
| 2332 | 1 | 2 | 0.425000  | 12.371667415 | 17.431442661  | 8.349425190   | 0 | 0 | 0 | # | ho  |
| 2333 | 1 | 3 | -1.050000 | 12.299920767 | 17.750750650  | 4.908780749   | 0 | 0 | 0 | # | ob  |
| 2334 | 1 | 3 | -1.050000 | 11.914883948 | 17.758665989  | 2.223829865   | 0 | 0 | 0 | # | ob  |
| 2335 | 1 | 3 | -1.050000 | 14.488420410 | 17.765964470  | 6.457577115   | 0 | 0 | 0 | # | ob  |
| 2336 | 1 | 3 | -1.050000 | 12.545350450 | 15.513870541  | 3.535812584   | 0 | 0 | 0 | # | ob  |
| 2337 | 1 | 3 | -1.050000 | 15.129943942 | 15.514671910  | 7.754751701   | 0 | 0 | 0 | # | ob  |
| 2338 | 1 | 3 | -1.050000 | 10.932205783 | -17.660039116 | 0.680433991   | 0 | 1 | 0 | # | ob  |
| 2339 | 1 | 3 | -1.050000 | 13.513775495 | -17.661884485 | 4.902851743   | 0 | 1 | 0 | # | ob  |
| 2340 | 1 | 3 | -1.050000 | 12.681125134 | -15.428256828 | 3.727147445   | 0 | 1 | 0 | # | ob  |
| 2341 | 1 | 3 | -1.050000 | 15.254542666 | -15.424740091 | 7.955469793   | 0 | 1 | 0 | # | ob  |
| 2342 | 1 | 3 | -1.050000 | 10.684199510 | -15.425454729 | 2.056943562   | 0 | 1 | 0 | # | ob  |
| 2343 | 1 | 3 | -1.050000 | 13.268759518 | -15.425177613 | 6.275700930   | 0 | 1 | 0 | # | ob  |
| 2344 | 1 | 4 | -0.950000 | 11.299417447 | -17.738142618 | 6.456311812   | 0 | 1 | 0 | # | oh  |
| 2345 | 1 | 4 | -0.950000 | 13.884670440 | -17.750835269 | 2.229260000   | 0 | 1 | 0 | # | oh  |
| 2346 | 1 | 3 | -1.050000 | 12.694590946 | -15.701706791 | 0.417596118   | 0 | 1 | 0 | # | ob  |
| 2347 | 1 | 3 | -1.050000 | 15.288875993 | -15.717859730 | 4.648938892   | 0 | 1 | 0 | # | ob  |
| 2348 | 1 | 4 | -0.950000 | 11.928965723 | 17.839710067  | 7.582229270   | 0 | 0 | 0 | # | oh  |
| 2349 | 1 | 3 | -1.050000 | 10.525551485 | 15.806346611  | 5.162916698   | 0 | 0 | 0 | # | ob  |
| 2350 | 1 | 4 | -0.950000 | 14.514576468 | 17.827436781  | 3.355759607   | 0 | 0 | 0 | # | oh  |
| 2351 | 1 | 3 | -1.050000 | 13.119269734 | 15.790522954  | 0.944364434   | 0 | 0 | 0 | # | ob  |
| 2352 | 1 | 3 | -1.050000 | 11.325537272 | -17.677041387 | 3.353842278   | 0 | 1 | 0 | # | ob  |
| 2353 | 1 | 3 | -1.050000 | 13.899085134 | -17.669834762 | 7.587875661   | 0 | 1 | 0 | # | ob  |
| 2354 | 1 | 3 | -1.050000 | 14.881437623 | 17.749076708  | 0.681739972   | 0 | 0 | 0 | # | ob  |
| 2355 | 1 | 3 | -1.050000 | 10.559334585 | 15.513833707  | 1.856176368   | 0 | 0 | 0 | # | ob  |
| 2356 | 1 | 3 | -1.050000 | 13.133287271 | 15.517136431  | 6.084357725   | 0 | 0 | 0 | # | ob  |
| 2357 | 1 | 5 | 2.100000  | 11.202603477 | -16.047600962 | 3.452486522   | 0 | 1 | 0 | # | st  |
| 2358 | 1 | 5 | 2.100000  | 13.774629217 | -16.038619659 | 7.680379551   | 0 | 1 | 0 | # | st  |
| 2359 | 1 | 5 | 2.100000  | 14.697976051 | 16.130136608  | 0.744074984   | 0 | 0 | 0 | # | st  |
| 2360 | 1 | 5 | 2.100000  | 12.039333961 | 16.127439967  | 2.131278354   | 0 | 0 | 0 | # | st  |
| 2361 | 1 | 5 | 2.100000  | 14.611750250 | 16.136517420  | 6.359024273   | 0 | 0 | 0 | # | st  |
| 2362 | 1 | 5 | 2.100000  | 11.115878839 | -16.041150089 | 0.617961151   | 0 | 1 | 0 | # | st  |
| 2363 | 1 | 5 | 2.100000  | 13.704272668 | -16.044802575 | 4.839744405   | 0 | 1 | 0 | # | st  |
| 2364 | 1 | 5 | 2.100000  | 12.110018745 | 16.133504185  | 4.971778212   | 0 | 0 | 0 | # | st  |
| 2365 | 1 | 1 | 1.575000  | 12.890551898 | -18.710342674 | 14.792747493  | 0 | 1 | 0 | # | ao  |
| 2366 | 1 | 1 | 1.575000  | 15.477691886 | -18.720367335 | 10.569647493  | 0 | 1 | 0 | # | ao  |
| 2367 | 1 | 1 | 1.575000  | 10.336075843 | -18.727185446 | 16.141210963  | 0 | 1 | 0 | # | ao  |
| 2368 | 1 | 1 | 1.575000  | 12.923079300 | -18.737173074 | 11.918102305  | 0 | 1 | 0 | # | ao  |
| 2369 | 1 | 2 | 0.425000  | 13.441955855 | -17.343036629 | 9.911451013   | 0 | 1 | 0 | # | ho  |
| 2370 | 1 | 2 | 0.425000  | 10.871522528 | -17.244695847 | 14.180912462  | 0 | 1 | 0 | # | ho  |

|      |   |   |           |              |               |               |   |   |   |   |     |
|------|---|---|-----------|--------------|---------------|---------------|---|---|---|---|-----|
| 2371 | 1 | 2 | 0.425000  | 14.943264323 | 17.337409910  | 12.532201022  | 0 | 0 | 0 | # | ho  |
| 2372 | 1 | 2 | 0.425000  | 12.371667415 | 17.431442661  | 16.799025190  | 0 | 0 | 0 | # | ho  |
| 2373 | 1 | 3 | -1.050000 | 12.299920767 | 17.750750650  | 13.358380749  | 0 | 0 | 0 | # | ob  |
| 2374 | 1 | 3 | -1.050000 | 11.914883948 | 17.758665989  | 10.673429865  | 0 | 0 | 0 | # | ob  |
| 2375 | 1 | 3 | -1.050000 | 14.488420410 | 17.765964470  | 14.907177115  | 0 | 0 | 0 | # | ob  |
| 2376 | 1 | 3 | -1.050000 | 12.545350450 | 15.513870541  | 11.985412584  | 0 | 0 | 0 | # | ob  |
| 2377 | 1 | 6 | -0.950000 | 15.129943942 | 15.514671910  | -17.594048299 | 0 | 0 | 0 | # | oht |
| 2378 | 1 | 3 | -1.050000 | 10.932205783 | -17.660039116 | 9.130033991   | 0 | 1 | 0 | # | ob  |
| 2379 | 1 | 3 | -1.050000 | 13.513775495 | -17.661884485 | 13.352451743  | 0 | 1 | 0 | # | ob  |
| 2380 | 1 | 3 | -1.050000 | 12.681125134 | -15.428256828 | 12.176747445  | 0 | 1 | 0 | # | ob  |
| 2381 | 1 | 3 | -1.050000 | 15.254542666 | -15.424740091 | 16.405069793  | 0 | 1 | 0 | # | ob  |
| 2382 | 1 | 3 | -1.050000 | 10.684199510 | -15.425454729 | 10.506543562  | 0 | 1 | 0 | # | ob  |
| 2383 | 1 | 3 | -1.050000 | 13.268759518 | -15.425177613 | 14.725300930  | 0 | 1 | 0 | # | ob  |
| 2384 | 1 | 4 | -0.950000 | 11.299417447 | -17.738142618 | 14.905911812  | 0 | 1 | 0 | # | oh  |
| 2385 | 1 | 4 | -0.950000 | 13.884670440 | -17.750835269 | 10.678860000  | 0 | 1 | 0 | # | oh  |
| 2386 | 1 | 3 | -1.050000 | 12.694590946 | -15.701706791 | 8.867196118   | 0 | 1 | 0 | # | ob  |
| 2387 | 1 | 3 | -1.050000 | 15.288875993 | -15.717859730 | 13.098538892  | 0 | 1 | 0 | # | ob  |
| 2388 | 1 | 7 | -0.950000 | 11.928965723 | 17.839710067  | 16.031829270  | 0 | 0 | 0 | # | oho |
| 2389 | 1 | 3 | -1.050000 | 10.525551485 | 15.806346611  | 13.612516698  | 0 | 0 | 0 | # | ob  |
| 2390 | 1 | 4 | -0.950000 | 14.514576468 | 17.827436781  | 11.805359607  | 0 | 0 | 0 | # | oh  |
| 2391 | 1 | 3 | -1.050000 | 13.119269734 | 15.790522954  | 9.393964434   | 0 | 0 | 0 | # | ob  |
| 2392 | 1 | 3 | -1.050000 | 11.325537272 | -17.677041387 | 11.803442278  | 0 | 1 | 0 | # | ob  |
| 2393 | 1 | 3 | -1.050000 | 13.899085134 | -17.669834762 | 16.037475661  | 0 | 1 | 0 | # | ob  |
| 2394 | 1 | 3 | -1.050000 | 14.881437623 | 17.749076708  | 9.131339972   | 0 | 0 | 0 | # | ob  |
| 2395 | 1 | 3 | -1.050000 | 10.599334585 | 15.513833707  | 10.305776368  | 0 | 0 | 0 | # | ob  |
| 2396 | 1 | 3 | -1.050000 | 13.133287271 | 15.517136431  | 14.533957725  | 0 | 0 | 0 | # | ob  |
| 2397 | 1 | 5 | 2.100000  | 11.202603477 | -16.047600962 | 11.902086522  | 0 | 1 | 0 | # | st  |
| 2398 | 1 | 5 | 2.100000  | 13.774629217 | -16.038619659 | 16.129979551  | 0 | 1 | 0 | # | st  |
| 2399 | 1 | 5 | 2.100000  | 14.697976051 | 16.130136608  | 9.193674984   | 0 | 0 | 0 | # | st  |
| 2400 | 1 | 5 | 2.100000  | 12.039333961 | 16.127439967  | 10.580878354  | 0 | 0 | 0 | # | st  |
| 2401 | 1 | 5 | 2.100000  | 14.611750250 | 16.136517420  | 14.808624273  | 0 | 0 | 0 | # | st  |
| 2402 | 1 | 5 | 2.100000  | 11.115878839 | -16.041150089 | 9.067561151   | 0 | 1 | 0 | # | st  |
| 2403 | 1 | 5 | 2.100000  | 13.704272668 | -16.044802575 | 13.289344045  | 0 | 1 | 0 | # | st  |
| 2404 | 1 | 5 | 2.100000  | 12.110018745 | 16.133504185  | 13.421378212  | 0 | 0 | 0 | # | st  |
| 2405 | 1 | 1 | 1.575000  | 12.890551898 | -18.710342674 | -10.556052507 | 0 | 1 | 0 | # | ao  |
| 2406 | 1 | 1 | 1.575000  | 15.477691886 | -18.720367335 | -14.779152507 | 0 | 1 | 0 | # | ao  |
| 2407 | 1 | 1 | 1.575000  | 10.336075843 | -18.727185446 | -9.207589037  | 0 | 1 | 0 | # | ao  |
| 2408 | 1 | 1 | 1.575000  | 12.923079300 | -18.737173074 | -13.430697695 | 0 | 1 | 0 | # | ao  |
| 2409 | 1 | 2 | 0.425000  | 13.441955855 | -17.343036629 | -15.437348987 | 0 | 1 | 0 | # | ho  |
| 2410 | 1 | 2 | 0.425000  | 10.871522528 | -17.244695847 | -11.167887538 | 0 | 1 | 0 | # | ho  |
| 2411 | 1 | 2 | 0.425000  | 14.943264323 | 17.337409910  | -12.816598978 | 0 | 0 | 0 | # | ho  |
| 2412 | 1 | 2 | 0.425000  | 12.371667415 | 17.431442661  | -8.549774810  | 0 | 0 | 0 | # | ho  |
| 2413 | 1 | 3 | -1.050000 | 12.299920767 | 17.750750650  | -11.990419251 | 0 | 0 | 0 | # | ob  |
| 2414 | 1 | 3 | -1.050000 | 11.914883948 | 17.758665989  | -14.675370135 | 0 | 0 | 0 | # | ob  |
| 2415 | 1 | 3 | -1.050000 | 14.488420410 | 17.765964470  | -10.441622885 | 0 | 0 | 0 | # | ob  |
| 2416 | 1 | 3 | -1.050000 | 12.545350450 | 15.513870541  | -13.363387416 | 0 | 0 | 0 | # | ob  |
| 2417 | 1 | 3 | -1.050000 | 15.129943942 | 15.514671910  | -9.144448299  | 0 | 0 | 0 | # | ob  |
| 2418 | 1 | 3 | -1.050000 | 10.932205783 | -17.660039116 | 17.579633991  | 0 | 1 | 0 | # | ob  |
| 2419 | 1 | 3 | -1.050000 | 13.513775495 | -17.661884485 | -11.996348257 | 0 | 1 | 0 | # | ob  |
| 2420 | 1 | 3 | -1.050000 | 12.681125134 | -15.428256828 | -13.172052555 | 0 | 1 | 0 | # | ob  |
| 2421 | 1 | 3 | -1.050000 | 15.254542666 | -15.424740091 | -8.943730207  | 0 | 1 | 0 | # | ob  |
| 2422 | 1 | 6 | -0.950000 | 10.684199510 | -15.425454729 | 18.956143562  | 0 | 1 | 0 | # | oht |
| 2423 | 1 | 3 | -1.050000 | 13.268759518 | -15.425177613 | -10.623499070 | 0 | 1 | 0 | # | ob  |
| 2424 | 1 | 4 | -0.950000 | 11.299417447 | -17.738142618 | -10.442888188 | 0 | 1 | 0 | # | oh  |
| 2425 | 1 | 7 | -0.950000 | 13.884670440 | -17.750835269 | -14.669940000 | 0 | 1 | 0 | # | oho |
| 2426 | 1 | 3 | -1.050000 | 12.694590946 | -15.701706791 | 17.316796118  | 0 | 1 | 0 | # | ob  |
| 2427 | 1 | 3 | -1.050000 | 15.288875993 | -15.717859730 | -12.250261108 | 0 | 1 | 0 | # | ob  |
| 2428 | 1 | 4 | -0.950000 | 11.928965723 | 17.839710067  | -9.316970730  | 0 | 0 | 0 | # | oh  |
| 2429 | 1 | 3 | -1.050000 | 10.525551485 | 15.806346611  | -11.736283302 | 0 | 0 | 0 | # | ob  |
| 2430 | 1 | 4 | -0.950000 | 14.514576468 | 17.827436781  | -13.543440393 | 0 | 0 | 0 | # | oh  |
| 2431 | 1 | 3 | -1.050000 | 13.119269734 | 15.790522954  | -15.954835566 | 0 | 0 | 0 | # | ob  |
| 2432 | 1 | 3 | -1.050000 | 11.325537272 | -17.677041387 | -13.545357722 | 0 | 1 | 0 | # | ob  |
| 2433 | 1 | 3 | -1.050000 | 13.899085134 | -17.669834762 | -9.311324339  | 0 | 1 | 0 | # | ob  |
| 2434 | 1 | 3 | -1.050000 | 14.881437623 | 17.749076708  | -16.217460028 | 0 | 0 | 0 | # | ob  |
| 2435 | 1 | 3 | -1.050000 | 10.599334585 | 15.513833707  | -15.043023632 | 0 | 0 | 0 | # | ob  |
| 2436 | 1 | 3 | -1.050000 | 13.133287271 | 15.517136431  | -10.814842275 | 0 | 0 | 0 | # | ob  |
| 2437 | 1 | 5 | 2.100000  | 11.202603477 | -16.047600962 | -13.446713478 | 0 | 1 | 0 | # | st  |
| 2438 | 1 | 5 | 2.100000  | 13.774629217 | -16.038619659 | -9.218820449  | 0 | 1 | 0 | # | st  |
| 2439 | 1 | 5 | 2.100000  | 14.697976051 | 16.130136608  | -16.155125016 | 0 | 0 | 0 | # | st  |
| 2440 | 1 | 5 | 2.100000  | 12.039333961 | 16.127439967  | -14.767921646 | 0 | 0 | 0 | # | st  |
| 2441 | 1 | 5 | 2.100000  | 14.611750250 | 16.136517420  | -10.540175727 | 0 | 0 | 0 | # | st  |
| 2442 | 1 | 5 | 2.100000  | 11.115878839 | -16.041150089 | 17.517161151  | 0 | 1 | 0 | # | st  |
| 2443 | 1 | 5 | 2.100000  | 13.704272668 | -16.044802575 | -12.059455955 | 0 | 1 | 0 | # | st  |
| 2444 | 1 | 5 | 2.100000  | 12.110018745 | 16.133504185  | -11.927421788 | 0 | 0 | 0 | # | st  |
| 2445 | 1 | 1 | 1.575000  | 12.890551898 | -18.710342674 | -2.106452507  | 0 | 1 | 0 | # | ao  |
| 2446 | 1 | 1 | 1.575000  | 15.477691886 | -18.720367335 | -6.329552507  | 0 | 1 | 0 | # | ao  |
| 2447 | 1 | 1 | 1.575000  | 10.336075843 | -18.727185446 | -0.757989037  | 0 | 1 | 0 | # | ao  |
| 2448 | 1 | 1 | 1.575000  | 12.923079300 | -18.737173074 | -4.981097695  | 0 | 1 | 0 | # | ao  |
| 2449 | 1 | 2 | 0.425000  | 13.441955855 | -17.343036629 | -6.987748987  | 0 | 1 | 0 | # | ho  |
| 2450 | 1 | 2 | 0.425000  | 10.871522528 | -17.244695847 | -2.718287538  | 0 | 1 | 0 | # | ho  |
| 2451 | 1 | 2 | 0.425000  | 14.943264323 | 17.337409910  | -4.366998978  | 0 | 0 | 0 | # | ho  |
| 2452 | 1 | 2 | 0.425000  | 12.371667415 | 17.431442661  | -0.100174810  | 0 | 0 | 0 | # | ho  |
| 2453 | 1 | 3 | -1.050000 | 12.299920767 | 17.750750650  | -3.540819251  | 0 | 0 | 0 | # | ob  |
| 2454 | 1 | 3 | -1.050000 | 11.914883948 | 17.758665989  | -6.225770135  | 0 | 0 | 0 | # | ob  |
| 2455 | 1 | 3 | -1.050000 | 14.488420410 | 17.765964470  | -11.992022885 | 0 | 0 | 0 | # | ob  |
| 2456 | 1 | 3 | -1.050000 | 12.545350450 | 15.513870541  | -4.913787416  | 0 | 0 | 0 | # | ob  |
| 2457 | 1 | 3 | -1.050000 | 15.129943942 | 15.514671910  | -0.694848299  | 0 | 0 | 0 | # | ob  |
| 2458 | 1 | 3 | -1.050000 | 10.932205783 | -17.660039116 | -7.769166009  | 0 | 1 | 0 | # | ob  |
| 2459 | 1 | 3 | -1.050000 | 13.513775495 | -17.661884485 | -3.546748257  | 0 | 1 | 0 | # | ob  |
| 2460 | 1 | 3 | -1.050000 | 12.681125134 | -15.428256828 | -4.722452555  | 0 | 1 | 0 | # | ob  |
| 2461 | 1 | 3 | -1.050000 | 15.254542666 | -15.424740091 | -0.494130207  | 0 | 1 | 0 | # | ob  |
| 2462 | 1 | 3 | -1.050000 | 10.684199510 | -15.425454729 | -6.392656438  | 0 | 1 | 0 | # | ob  |
| 2463 | 1 | 3 | -1.050000 | 13.268759518 | -15.425177613 | -2.173899070  | 0 | 1 | 0 | # | ob  |

|      |   |   |           |               |               |               |   |   |   |   |     |
|------|---|---|-----------|---------------|---------------|---------------|---|---|---|---|-----|
| 2464 | 1 | 4 | -0.950000 | 11.299417447  | -17.738142618 | -1.993288188  | 0 | 1 | 0 | # | oh  |
| 2465 | 1 | 4 | -0.950000 | 13.884670440  | -17.750835269 | -6.220340000  | 0 | 1 | 0 | # | oh  |
| 2466 | 1 | 3 | -1.050000 | 12.694590946  | -15.701706791 | -8.032003882  | 0 | 1 | 0 | # | ob  |
| 2467 | 1 | 3 | -1.050000 | 15.288875993  | -15.717859730 | -3.800661108  | 0 | 1 | 0 | # | ob  |
| 2468 | 1 | 4 | -0.950000 | 11.928965723  | 17.839710067  | -0.867370730  | 0 | 0 | 0 | # | oh  |
| 2469 | 1 | 3 | -1.050000 | 10.525551485  | 15.806346611  | -3.286683302  | 0 | 0 | 0 | # | ob  |
| 2470 | 1 | 4 | -0.950000 | 14.514576468  | 17.827436781  | -5.093840393  | 0 | 0 | 0 | # | oh  |
| 2471 | 1 | 3 | -1.050000 | 13.119269734  | 15.790522954  | -7.505255566  | 0 | 0 | 0 | # | ob  |
| 2472 | 1 | 3 | -1.050000 | 11.325537272  | -17.677041387 | -5.095757722  | 0 | 1 | 0 | # | ob  |
| 2473 | 1 | 3 | -1.050000 | 13.899085134  | -17.669834762 | -0.861724339  | 0 | 1 | 0 | # | ob  |
| 2474 | 1 | 3 | -1.050000 | 14.881437623  | 17.749076708  | -7.767860028  | 0 | 0 | 0 | # | ob  |
| 2475 | 1 | 3 | -1.050000 | 10.559334585  | 15.513833707  | -6.593423632  | 0 | 0 | 0 | # | ob  |
| 2476 | 1 | 3 | -1.050000 | 13.133287271  | 15.517136431  | -2.365242275  | 0 | 0 | 0 | # | ob  |
| 2477 | 1 | 5 | 2.100000  | 11.202603477  | -16.047600962 | -4.997113478  | 0 | 1 | 0 | # | st  |
| 2478 | 1 | 5 | 2.100000  | 13.774629217  | -16.038619659 | -0.769220449  | 0 | 1 | 0 | # | st  |
| 2479 | 1 | 5 | 2.100000  | 14.697976051  | 16.130136608  | -7.705525016  | 0 | 0 | 0 | # | st  |
| 2480 | 1 | 5 | 2.100000  | 12.039333961  | 16.127439967  | -6.318321646  | 0 | 0 | 0 | # | st  |
| 2481 | 1 | 5 | 2.100000  | 14.611750250  | 16.136517420  | -2.090575727  | 0 | 0 | 0 | # | st  |
| 2482 | 1 | 5 | 2.100000  | 11.115878839  | -16.041150089 | -7.831638849  | 0 | 1 | 0 | # | st  |
| 2483 | 1 | 5 | 2.100000  | 13.704272668  | -16.044802575 | -3.609855955  | 0 | 1 | 0 | # | st  |
| 2484 | 1 | 5 | 2.100000  | 12.110018745  | 16.133504185  | -3.477821788  | 0 | 0 | 0 | # | st  |
| 2485 | 1 | 6 | -0.950000 | 15.171651183  | 16.134128849  | 16.634714390  | 0 | 0 | 0 | # | oht |
| 2486 | 1 | 6 | -0.950000 | 10.915806465  | -15.806715341 | -15.319631379 | 0 | 1 | 0 | # | oht |
| 2487 | 1 | 2 | 0.425000  | 10.755563167  | -15.689544923 | -16.411736324 | 0 | 1 | 0 | # | ho  |
| 2488 | 1 | 2 | 0.425000  | 15.336389943  | 15.784241026  | -18.650841835 | 0 | 0 | 0 | # | ho  |
| 2489 | 1 | 2 | 0.425000  | 10.761038959  | -15.518101635 | 20.059598264  | 0 | 1 | 0 | # | ho  |
| 2490 | 1 | 2 | 0.425000  | 14.783433436  | 16.234513767  | 17.669755394  | 0 | 0 | 0 | # | ho  |
| 2491 | 1 | 1 | 1.575000  | -12.923448102 | -18.710342674 | 6.343147493   | 1 | 1 | 0 | # | ao  |
| 2492 | 1 | 1 | 1.575000  | -10.336308114 | -18.720367335 | 2.120047493   | 1 | 1 | 0 | # | ao  |
| 2493 | 1 | 1 | 1.575000  | -15.477924157 | -18.727185446 | 7.691610963   | 1 | 1 | 0 | # | ao  |
| 2494 | 1 | 1 | 1.575000  | -12.890920700 | -18.737173074 | 3.468502305   | 1 | 1 | 0 | # | ao  |
| 2495 | 1 | 2 | 0.425000  | -12.372044145 | -17.343036629 | 1.461851013   | 1 | 1 | 0 | # | ho  |
| 2496 | 1 | 2 | 0.425000  | -14.942477472 | -17.244695847 | 5.731312462   | 1 | 1 | 0 | # | ho  |
| 2497 | 1 | 2 | 0.425000  | -10.870735677 | 17.337409910  | 4.082601022   | 1 | 0 | 0 | # | ho  |
| 2498 | 1 | 2 | 0.425000  | -13.442332585 | 17.431442661  | 8.349425190   | 1 | 0 | 0 | # | ho  |
| 2499 | 1 | 3 | -1.050000 | -13.514079233 | 17.750750650  | 4.908780749   | 1 | 0 | 0 | # | ob  |
| 2500 | 1 | 3 | -1.050000 | -13.899116052 | 17.758665989  | 2.223829865   | 1 | 0 | 0 | # | ob  |
| 2501 | 1 | 3 | -1.050000 | -11.325579590 | 17.765964470  | 6.457577115   | 1 | 0 | 0 | # | ob  |
| 2502 | 1 | 3 | -1.050000 | -13.268649550 | 15.513870541  | 3.535812584   | 1 | 0 | 0 | # | ob  |
| 2503 | 1 | 3 | -1.050000 | -10.684056058 | 15.514671910  | 7.754751701   | 1 | 0 | 0 | # | ob  |
| 2504 | 1 | 3 | -1.050000 | -14.881794217 | -17.660039116 | 0.680433991   | 1 | 1 | 0 | # | ob  |
| 2505 | 1 | 3 | -1.050000 | -12.300224505 | -17.661884485 | 4.902851743   | 1 | 1 | 0 | # | ob  |
| 2506 | 1 | 3 | -1.050000 | -13.132874866 | -15.428256828 | 3.727147445   | 1 | 1 | 0 | # | ob  |
| 2507 | 1 | 3 | -1.050000 | -10.559457334 | -15.424740091 | 7.955469793   | 1 | 1 | 0 | # | ob  |
| 2508 | 1 | 3 | -1.050000 | -15.129800490 | -15.425454729 | 2.056943562   | 1 | 1 | 0 | # | ob  |
| 2509 | 1 | 3 | -1.050000 | -12.545240482 | -15.425177613 | 6.275700930   | 1 | 1 | 0 | # | ob  |
| 2510 | 1 | 4 | -0.950000 | -14.514582553 | -17.738142618 | 6.456311812   | 1 | 1 | 0 | # | oh  |
| 2511 | 1 | 4 | -0.950000 | -11.929329560 | -17.750835269 | 2.229260000   | 1 | 1 | 0 | # | oh  |
| 2512 | 1 | 3 | -1.050000 | -13.119409054 | -15.701706791 | 0.417596118   | 1 | 1 | 0 | # | ob  |
| 2513 | 1 | 3 | -1.050000 | -10.525124007 | -15.717859730 | 4.648938892   | 1 | 1 | 0 | # | ob  |
| 2514 | 1 | 4 | -0.950000 | -13.885034277 | 17.839710067  | 7.582292270   | 1 | 0 | 0 | # | oh  |
| 2515 | 1 | 3 | -1.050000 | -15.288448515 | 15.806346611  | 5.162916698   | 1 | 0 | 0 | # | ob  |
| 2516 | 1 | 4 | -0.950000 | -11.299423532 | 17.827436781  | 3.355759607   | 1 | 0 | 0 | # | oh  |
| 2517 | 1 | 3 | -1.050000 | -12.694730266 | 15.790522954  | 0.944364434   | 1 | 0 | 0 | # | ob  |
| 2518 | 1 | 3 | -1.050000 | -14.488462728 | -17.677041387 | 3.353842278   | 1 | 1 | 0 | # | ob  |
| 2519 | 1 | 3 | -1.050000 | -11.914914866 | -17.669834762 | 7.587875661   | 1 | 1 | 0 | # | ob  |
| 2520 | 1 | 3 | -1.050000 | -10.932562377 | 17.749076708  | 0.681739972   | 1 | 0 | 0 | # | ob  |
| 2521 | 1 | 3 | -1.050000 | -15.254665415 | 15.513833707  | 1.856176368   | 1 | 0 | 0 | # | ob  |
| 2522 | 1 | 3 | -1.050000 | -12.680712729 | 15.517136431  | 6.084357725   | 1 | 0 | 0 | # | ob  |
| 2523 | 1 | 5 | 2.100000  | -14.611396523 | -16.047600962 | 3.452486522   | 1 | 1 | 0 | # | st  |
| 2524 | 1 | 5 | 2.100000  | -12.039370783 | -16.038619659 | 7.680379551   | 1 | 1 | 0 | # | st  |
| 2525 | 1 | 5 | 2.100000  | -11.116023949 | 16.130136608  | 0.744074984   | 1 | 0 | 0 | # | st  |
| 2526 | 1 | 5 | 2.100000  | -13.774666039 | 16.127439967  | 2.131278354   | 1 | 0 | 0 | # | st  |
| 2527 | 1 | 5 | 2.100000  | -11.202249750 | 16.136517420  | 6.359024273   | 1 | 0 | 0 | # | st  |
| 2528 | 1 | 5 | 2.100000  | -14.698121161 | -16.041150089 | 0.617961151   | 1 | 1 | 0 | # | st  |
| 2529 | 1 | 5 | 2.100000  | -12.109727332 | -16.044802575 | 4.839744045   | 1 | 1 | 0 | # | st  |
| 2530 | 1 | 5 | 2.100000  | -13.703981255 | 16.133504185  | 4.971778212   | 1 | 0 | 0 | # | st  |
| 2531 | 1 | 1 | 1.575000  | -12.923448102 | -18.710342674 | 14.792747493  | 1 | 1 | 0 | # | ao  |
| 2532 | 1 | 1 | 1.575000  | -10.336308114 | -18.720367335 | 10.569647493  | 1 | 1 | 0 | # | ao  |
| 2533 | 1 | 1 | 1.575000  | -15.477924157 | -18.727185446 | 16.141210963  | 1 | 1 | 0 | # | ao  |
| 2534 | 1 | 1 | 1.575000  | -12.890920700 | -18.737173074 | 11.918102305  | 1 | 1 | 0 | # | ao  |
| 2535 | 1 | 2 | 0.425000  | -12.372044145 | -17.343036629 | 9.911451013   | 1 | 1 | 0 | # | ho  |
| 2536 | 1 | 2 | 0.425000  | -14.942477472 | -17.244695847 | 14.180912462  | 1 | 1 | 0 | # | ho  |
| 2537 | 1 | 2 | 0.425000  | -10.870735677 | 17.337409910  | 12.532201022  | 1 | 0 | 0 | # | ho  |
| 2538 | 1 | 2 | 0.425000  | -13.442332585 | 17.431442661  | 16.799025190  | 1 | 0 | 0 | # | ho  |
| 2539 | 1 | 3 | -1.050000 | -13.514079233 | 17.750750650  | 13.358380749  | 1 | 0 | 0 | # | ob  |
| 2540 | 1 | 3 | -1.050000 | -13.899116052 | 17.758665989  | 10.673429865  | 1 | 0 | 0 | # | ob  |
| 2541 | 1 | 3 | -1.050000 | -11.325579590 | 17.765964470  | 14.907177115  | 1 | 0 | 0 | # | ob  |
| 2542 | 1 | 3 | -1.050000 | -13.268649550 | 15.513870541  | 11.985412584  | 1 | 0 | 0 | # | ob  |
| 2543 | 1 | 6 | -0.950000 | -10.684056058 | 15.514671910  | -17.594048299 | 1 | 0 | 0 | # | oht |
| 2544 | 1 | 3 | -1.050000 | -14.881794217 | -17.660039116 | 9.130033991   | 1 | 1 | 0 | # | ob  |
| 2545 | 1 | 3 | -1.050000 | -12.300224505 | -17.661884485 | 13.352451743  | 1 | 1 | 0 | # | ob  |
| 2546 | 1 | 3 | -1.050000 | -13.132874866 | -15.428256828 | 12.176747445  | 1 | 1 | 0 | # | ob  |
| 2547 | 1 | 3 | -1.050000 | -10.559457334 | -15.424740091 | 16.405069793  | 1 | 1 | 0 | # | ob  |
| 2548 | 1 | 3 | -1.050000 | -15.129800490 | -15.425454729 | 10.506543562  | 1 | 1 | 0 | # | ob  |
| 2549 | 1 | 3 | -1.050000 | -12.545240482 | -15.425177613 | 14.725300930  | 1 | 1 | 0 | # | ob  |
| 2550 | 1 | 4 | -0.950000 | -14.514582553 | -17.738142618 | 14.905911812  | 1 | 1 | 0 | # | oh  |
| 2551 | 1 | 4 | -0.950000 | -11.929329560 | -17.750835269 | 10.678860000  | 1 | 1 | 0 | # | oh  |
| 2552 | 1 | 3 | -1.050000 | -13.119409054 | -15.701706791 | 8.867196118   | 1 | 1 | 0 | # | ob  |
| 2553 | 1 | 3 | -1.050000 | -10.525124007 | -15.717859730 | 13.098538892  | 1 | 1 | 0 | # | ob  |
| 2554 | 1 | 7 | -0.950000 | -13.885034277 | 17.839710067  | 16.031829270  | 1 | 0 | 0 | # | oho |
| 2555 | 1 | 3 | -1.050000 | -15.288448515 | 15.806346611  | 13.612516698  | 1 | 0 | 0 | # | ob  |
| 2556 | 1 | 4 | -0.950000 | -11.299423532 | 17.827436781  | 11.805359607  | 1 | 0 | 0 | # | oh  |

|      |   |   |           |               |               |               |   |   |   |     |
|------|---|---|-----------|---------------|---------------|---------------|---|---|---|-----|
| 2557 | 1 | 3 | -1.050000 | -12.694730266 | 15.790522954  | 9.393964434   | 1 | 0 | 0 | ob  |
| 2558 | 1 | 3 | -1.050000 | -14.488462728 | -17.677041387 | 11.803442278  | 1 | 1 | 0 | ob  |
| 2559 | 1 | 3 | -1.050000 | -11.914914866 | -17.669834762 | 16.037475661  | 1 | 1 | 0 | ob  |
| 2560 | 1 | 3 | -1.050000 | -10.932562377 | 17.749076708  | 9.131339972   | 1 | 0 | 0 | ob  |
| 2561 | 1 | 3 | -1.050000 | -15.254665415 | 15.513833707  | 10.305776368  | 1 | 0 | 0 | ob  |
| 2562 | 1 | 3 | -1.050000 | -12.680712729 | 15.517136431  | 14.533957725  | 1 | 0 | 0 | ob  |
| 2563 | 1 | 5 | 2.100000  | -14.611396523 | -16.047600962 | 11.902086522  | 1 | 1 | 0 | st  |
| 2564 | 1 | 5 | 2.100000  | -12.039370783 | -16.038619659 | 16.129979551  | 1 | 1 | 0 | st  |
| 2565 | 1 | 5 | 2.100000  | -11.116023949 | 16.130136608  | 9.193674984   | 1 | 0 | 0 | st  |
| 2566 | 1 | 5 | 2.100000  | -13.774666039 | 16.127439967  | 10.580878354  | 1 | 0 | 0 | st  |
| 2567 | 1 | 5 | 2.100000  | -11.202249750 | 16.136517420  | 14.808624273  | 1 | 0 | 0 | st  |
| 2568 | 1 | 5 | 2.100000  | -14.698121161 | -16.041150089 | 9.067561151   | 1 | 1 | 0 | st  |
| 2569 | 1 | 5 | 2.100000  | -12.109727332 | -16.044802575 | 13.289344045  | 1 | 1 | 0 | st  |
| 2570 | 1 | 5 | 2.100000  | -13.703981255 | 16.133504185  | 13.421378212  | 1 | 0 | 0 | st  |
| 2571 | 1 | 1 | 1.575000  | -12.923448102 | -18.710342674 | -10.556052507 | 1 | 1 | 0 | ao  |
| 2572 | 1 | 1 | 1.575000  | -10.336308114 | -18.720367335 | -14.779152507 | 1 | 1 | 0 | ao  |
| 2573 | 1 | 1 | 1.575000  | -15.477924157 | -18.727185446 | -9.207589037  | 1 | 1 | 0 | ao  |
| 2574 | 1 | 1 | 1.575000  | -12.890920700 | -18.737173074 | -13.430697695 | 1 | 1 | 0 | ao  |
| 2575 | 1 | 2 | 0.425000  | -12.372044145 | -17.343036629 | -15.437348987 | 1 | 1 | 0 | ho  |
| 2576 | 1 | 2 | 0.425000  | -14.942477472 | -17.244695847 | -11.167887538 | 1 | 1 | 0 | ho  |
| 2577 | 1 | 2 | 0.425000  | -10.870735677 | 17.337409910  | -12.816598978 | 1 | 0 | 0 | ho  |
| 2578 | 1 | 2 | 0.425000  | -13.442332585 | 17.431442661  | -8.549774810  | 1 | 0 | 0 | ho  |
| 2579 | 1 | 3 | -1.050000 | -13.514079233 | 17.750750650  | -11.990419251 | 1 | 0 | 0 | ob  |
| 2580 | 1 | 3 | -1.050000 | -13.899116052 | 17.758665989  | -14.675370135 | 1 | 0 | 0 | ob  |
| 2581 | 1 | 3 | -1.050000 | -11.325579590 | 17.765964470  | -10.441622885 | 1 | 0 | 0 | ob  |
| 2582 | 1 | 3 | -1.050000 | -13.268649550 | 15.513870541  | -13.363387416 | 1 | 0 | 0 | ob  |
| 2583 | 1 | 3 | -1.050000 | -10.684056058 | 15.514671910  | -9.144448299  | 1 | 0 | 0 | ob  |
| 2584 | 1 | 3 | -1.050000 | -14.881794217 | -17.660039116 | 17.579633991  | 1 | 1 | 0 | ob  |
| 2585 | 1 | 3 | -1.050000 | -12.300224505 | -17.661884485 | -11.996348257 | 1 | 1 | 0 | ob  |
| 2586 | 1 | 3 | -1.050000 | -13.132874866 | -15.428256828 | -13.172052555 | 1 | 1 | 0 | ob  |
| 2587 | 1 | 3 | -1.050000 | -10.559457334 | -15.424740091 | -8.943730207  | 1 | 1 | 0 | ob  |
| 2588 | 1 | 6 | -0.950000 | -15.129800490 | -15.425454729 | 18.956143562  | 1 | 1 | 0 | oht |
| 2589 | 1 | 3 | -1.050000 | -12.545240482 | -15.425177613 | -10.623499070 | 1 | 1 | 0 | ob  |
| 2590 | 1 | 4 | -0.950000 | -14.514582553 | -17.738142618 | -10.442888188 | 1 | 1 | 0 | oh  |
| 2591 | 1 | 7 | -0.950000 | -11.929329560 | -17.750835269 | -14.669940000 | 1 | 1 | 0 | oho |
| 2592 | 1 | 3 | -1.050000 | -13.119409054 | -15.701706791 | 17.316796118  | 1 | 1 | 0 | ob  |
| 2593 | 1 | 3 | -1.050000 | -10.525124007 | -15.717859730 | -12.250261108 | 1 | 1 | 0 | ob  |
| 2594 | 1 | 4 | -0.950000 | -13.885034277 | 17.839710067  | -9.316970730  | 1 | 0 | 0 | oh  |
| 2595 | 1 | 3 | -1.050000 | -15.288448515 | 15.806346611  | -11.736283302 | 1 | 0 | 0 | ob  |
| 2596 | 1 | 4 | -0.950000 | -11.299423532 | 17.827436781  | -13.543440393 | 1 | 0 | 0 | oh  |
| 2597 | 1 | 3 | -1.050000 | -12.694730266 | 15.790522954  | -15.954835566 | 1 | 0 | 0 | ob  |
| 2598 | 1 | 3 | -1.050000 | -14.488462728 | -17.677041387 | -13.545357722 | 1 | 1 | 0 | ob  |
| 2599 | 1 | 3 | -1.050000 | -11.914914866 | -17.669834762 | -9.311324339  | 1 | 1 | 0 | ob  |
| 2600 | 1 | 3 | -1.050000 | -10.932562377 | 17.749076708  | -16.217460028 | 1 | 0 | 0 | ob  |
| 2601 | 1 | 3 | -1.050000 | -15.254665415 | 15.513833707  | -15.043023632 | 1 | 0 | 0 | ob  |
| 2602 | 1 | 3 | -1.050000 | -12.680712729 | 15.517136431  | -10.814842275 | 1 | 0 | 0 | ob  |
| 2603 | 1 | 5 | 2.100000  | -14.611396523 | -16.047600962 | -13.446713478 | 1 | 1 | 0 | st  |
| 2604 | 1 | 5 | 2.100000  | -12.039370783 | -16.038619659 | -9.218820449  | 1 | 1 | 0 | st  |
| 2605 | 1 | 5 | 2.100000  | -11.116023949 | 16.130136608  | -16.155125016 | 1 | 0 | 0 | st  |
| 2606 | 1 | 5 | 2.100000  | -13.774666039 | 16.127439967  | -14.767921646 | 1 | 0 | 0 | st  |
| 2607 | 1 | 5 | 2.100000  | -11.202249750 | 16.136517420  | -10.540175727 | 1 | 0 | 0 | st  |
| 2608 | 1 | 5 | 2.100000  | -14.698121161 | -16.041150089 | 17.517161151  | 1 | 1 | 0 | st  |
| 2609 | 1 | 5 | 2.100000  | -12.109727332 | -16.044802575 | -12.059455955 | 1 | 1 | 0 | st  |
| 2610 | 1 | 5 | 2.100000  | -13.703981255 | 16.133504185  | -11.927421788 | 1 | 0 | 0 | st  |
| 2611 | 1 | 1 | 1.575000  | -12.923448102 | -18.710342674 | -2.106452507  | 1 | 1 | 0 | ao  |
| 2612 | 1 | 1 | 1.575000  | -10.336308114 | -18.720367335 | -6.329552507  | 1 | 1 | 0 | ao  |
| 2613 | 1 | 1 | 1.575000  | -15.477924157 | -18.727185446 | -0.757989037  | 1 | 1 | 0 | ao  |
| 2614 | 1 | 1 | 1.575000  | -12.890920700 | -18.737173074 | -4.981097695  | 1 | 1 | 0 | ao  |
| 2615 | 1 | 2 | 0.425000  | -12.372044145 | -17.343036629 | -6.987748987  | 1 | 1 | 0 | ho  |
| 2616 | 1 | 2 | 0.425000  | -14.942477472 | -17.244695847 | -2.718287538  | 1 | 1 | 0 | ho  |
| 2617 | 1 | 2 | 0.425000  | -10.870735677 | 17.337409910  | -4.366998978  | 1 | 0 | 0 | ho  |
| 2618 | 1 | 2 | 0.425000  | -13.442332585 | 17.431442661  | -0.100174810  | 1 | 0 | 0 | ho  |
| 2619 | 1 | 3 | -1.050000 | -13.514079233 | 17.750750650  | -3.540819251  | 1 | 0 | 0 | ob  |
| 2620 | 1 | 3 | -1.050000 | -13.899116052 | 17.758665989  | -6.225770135  | 1 | 0 | 0 | ob  |
| 2621 | 1 | 3 | -1.050000 | -11.325579590 | 17.765964470  | -1.992022885  | 1 | 0 | 0 | ob  |
| 2622 | 1 | 3 | -1.050000 | -13.268649550 | 15.513870541  | -4.913787416  | 1 | 0 | 0 | ob  |
| 2623 | 1 | 3 | -1.050000 | -10.684056058 | 15.514671910  | -0.694848299  | 1 | 0 | 0 | ob  |
| 2624 | 1 | 3 | -1.050000 | -14.881794217 | -17.660039116 | -7.769166009  | 1 | 1 | 0 | ob  |
| 2625 | 1 | 3 | -1.050000 | -12.300224505 | -17.661884485 | -3.546748257  | 1 | 1 | 0 | ob  |
| 2626 | 1 | 3 | -1.050000 | -13.132874866 | -15.428256828 | -4.722452555  | 1 | 1 | 0 | ob  |
| 2627 | 1 | 3 | -1.050000 | -10.559457334 | -15.424740091 | -0.494130207  | 1 | 1 | 0 | ob  |
| 2628 | 1 | 3 | -1.050000 | -15.129800490 | -15.425454729 | -6.392656438  | 1 | 1 | 0 | ob  |
| 2629 | 1 | 3 | -1.050000 | -12.545240482 | -15.425177613 | -2.173899070  | 1 | 1 | 0 | ob  |
| 2630 | 1 | 4 | -0.950000 | -14.514582553 | -17.738142618 | -1.993288188  | 1 | 1 | 0 | oh  |
| 2631 | 1 | 4 | -0.950000 | -11.929329560 | -17.750835269 | -6.220340000  | 1 | 1 | 0 | oh  |
| 2632 | 1 | 3 | -1.050000 | -13.119409054 | -15.701706791 | -8.032003882  | 1 | 1 | 0 | ob  |
| 2633 | 1 | 3 | -1.050000 | -10.525124007 | -15.717859730 | -3.800661108  | 1 | 1 | 0 | ob  |
| 2634 | 1 | 4 | -0.950000 | -13.885034277 | 17.839710067  | -0.867370730  | 1 | 0 | 0 | oh  |
| 2635 | 1 | 3 | -1.050000 | -15.288448515 | 15.806346611  | -3.286683302  | 1 | 0 | 0 | ob  |
| 2636 | 1 | 4 | -0.950000 | -11.299423532 | 17.827436781  | -5.093840393  | 1 | 0 | 0 | oh  |
| 2637 | 1 | 3 | -1.050000 | -12.694730266 | 15.790522954  | -7.505235566  | 1 | 0 | 0 | ob  |
| 2638 | 1 | 3 | -1.050000 | -14.488462728 | -17.677041387 | -5.095757722  | 1 | 1 | 0 | ob  |
| 2639 | 1 | 3 | -1.050000 | -11.914914866 | -17.669834762 | -0.861724339  | 1 | 1 | 0 | ob  |
| 2640 | 1 | 3 | -1.050000 | -10.932562377 | 17.749076708  | -7.767860028  | 1 | 0 | 0 | ob  |
| 2641 | 1 | 3 | -1.050000 | -15.254665415 | 15.513833707  | -6.593423632  | 1 | 0 | 0 | ob  |
| 2642 | 1 | 3 | -1.050000 | -12.680712729 | 15.517136431  | -2.365242275  | 1 | 0 | 0 | ob  |
| 2643 | 1 | 5 | 2.100000  | -14.611396523 | -16.047600962 | -4.997113478  | 1 | 1 | 0 | st  |
| 2644 | 1 | 5 | 2.100000  | -12.039370783 | -16.038619659 | -0.769220449  | 1 | 1 | 0 | st  |
| 2645 | 1 | 5 | 2.100000  | -11.116023949 | 16.130136608  | -7.705525016  | 1 | 0 | 0 | st  |
| 2646 | 1 | 5 | 2.100000  | -13.774666039 | 16.127439967  | -6.318321646  | 1 | 0 | 0 | st  |
| 2647 | 1 | 5 | 2.100000  | -11.202249750 | 16.136517420  | -2.090575727  | 1 | 0 | 0 | st  |
| 2648 | 1 | 5 | 2.100000  | -14.698121161 | -16.041150089 | -7.831638849  | 1 | 1 | 0 | st  |
| 2649 | 1 | 5 | 2.100000  | -12.109727332 | -16.044802575 | -3.609859555  | 1 | 1 | 0 | st  |



|      |   |   |           |               |               |               |   |   |   |   |     |
|------|---|---|-----------|---------------|---------------|---------------|---|---|---|---|-----|
| 2650 | 1 | 5 | 2.100000  | -13.703981255 | 16.133504185  | -3.477821788  | 1 | 0 | 0 | # | st  |
| 2651 | 1 | 6 | -0.950000 | -10.642348817 | 16.134128849  | 16.634714390  | 1 | 0 | 0 | # | oht |
| 2652 | 1 | 6 | -0.950000 | -14.898193535 | -15.806715341 | -15.319631379 | 1 | 1 | 0 | # | oht |
| 2653 | 1 | 2 | 0.425000  | -15.058436833 | -15.689544923 | -16.411736324 | 1 | 1 | 0 | # | ho  |
| 2654 | 1 | 2 | 0.425000  | -10.477610057 | 15.784241026  | -18.650841835 | 1 | 0 | 0 | # | ho  |
| 2655 | 1 | 2 | 0.425000  | -15.052961041 | -15.518101635 | 20.059598264  | 1 | 1 | 0 | # | ho  |
| 2656 | 1 | 2 | 0.425000  | -11.030566564 | 16.234513767  | 17.669755394  | 1 | 0 | 0 | # | ho  |
| 2657 | 1 | 1 | 1.575000  | -7.760648102  | -18.710342674 | 6.343147493   | 1 | 1 | 0 | # | ao  |
| 2658 | 1 | 1 | 1.575000  | -5.173508114  | -18.720367335 | 2.120047493   | 1 | 1 | 0 | # | ao  |
| 2659 | 1 | 1 | 1.575000  | -10.315124157 | -18.727185446 | 7.691610963   | 1 | 1 | 0 | # | ao  |
| 2660 | 1 | 1 | 1.575000  | -7.728120700  | -18.737173074 | 3.468502305   | 1 | 1 | 0 | # | ao  |
| 2661 | 1 | 2 | 0.425000  | -7.209244145  | -17.343036629 | 1.461851013   | 1 | 1 | 0 | # | ho  |
| 2662 | 1 | 2 | 0.425000  | -9.779677472  | -17.244695847 | 5.731312462   | 1 | 1 | 0 | # | ho  |
| 2663 | 1 | 2 | 0.425000  | -5.707935677  | 17.337409910  | 4.082601022   | 1 | 0 | 0 | # | ho  |
| 2664 | 1 | 2 | 0.425000  | -8.279532585  | 17.431442661  | 8.349425190   | 1 | 0 | 0 | # | ho  |
| 2665 | 1 | 3 | -1.050000 | -8.351279233  | 17.750750650  | 4.908780749   | 1 | 0 | 0 | # | ob  |
| 2666 | 1 | 3 | -1.050000 | -8.736316052  | 17.758665989  | 2.223829865   | 1 | 0 | 0 | # | ob  |
| 2667 | 1 | 3 | -1.050000 | -6.162779590  | 17.765964470  | 6.457577115   | 1 | 0 | 0 | # | ob  |
| 2668 | 1 | 3 | -1.050000 | -8.105849550  | 15.513870541  | 3.535812584   | 1 | 0 | 0 | # | ob  |
| 2669 | 1 | 3 | -1.050000 | -5.521265058  | 15.514671910  | 7.754751701   | 1 | 0 | 0 | # | ob  |
| 2670 | 1 | 3 | -1.050000 | -9.718994217  | -17.660039116 | 0.680433991   | 1 | 1 | 0 | # | ob  |
| 2671 | 1 | 3 | -1.050000 | -7.137424505  | -17.661884485 | 4.902851743   | 1 | 1 | 0 | # | ob  |
| 2672 | 1 | 3 | -1.050000 | -7.970074866  | -15.428256828 | 3.727147445   | 1 | 1 | 0 | # | ob  |
| 2673 | 1 | 3 | -1.050000 | -5.396657334  | -15.424740091 | 7.955469793   | 1 | 1 | 0 | # | ob  |
| 2674 | 1 | 3 | -1.050000 | -9.967000490  | -15.425454729 | 2.056943562   | 1 | 1 | 0 | # | ob  |
| 2675 | 1 | 3 | -1.050000 | -7.382440482  | -15.425177613 | 6.275700930   | 1 | 1 | 0 | # | ob  |
| 2676 | 1 | 4 | -0.950000 | -9.351782553  | -17.738142618 | 6.456311812   | 1 | 1 | 0 | # | oh  |
| 2677 | 1 | 4 | -0.950000 | -6.766529560  | -17.750835269 | 2.229260000   | 1 | 1 | 0 | # | oh  |
| 2678 | 1 | 3 | -1.050000 | -7.956609054  | -15.701706791 | 0.417596118   | 1 | 1 | 0 | # | ob  |
| 2679 | 1 | 3 | -1.050000 | -5.362324007  | -15.717859730 | 4.648938892   | 1 | 1 | 0 | # | ob  |
| 2680 | 1 | 4 | -0.950000 | -8.722234277  | 17.839710067  | 7.582229270   | 1 | 0 | 0 | # | oh  |
| 2681 | 1 | 3 | -1.050000 | -10.125648515 | 15.806346611  | 5.162916698   | 1 | 0 | 0 | # | ob  |
| 2682 | 1 | 4 | -0.950000 | -6.136623532  | 17.827436781  | 3.355759607   | 1 | 0 | 0 | # | oh  |
| 2683 | 1 | 3 | -1.050000 | -7.531930266  | 15.790522954  | 0.944364434   | 1 | 0 | 0 | # | ob  |
| 2684 | 1 | 3 | -1.050000 | -9.325662728  | -17.677041387 | 3.353842278   | 1 | 1 | 0 | # | ob  |
| 2685 | 1 | 3 | -1.050000 | -6.752114866  | -17.669834762 | 7.587875661   | 1 | 1 | 0 | # | ob  |
| 2686 | 1 | 3 | -1.050000 | -5.769762377  | 17.749076708  | 0.681739972   | 1 | 0 | 0 | # | ob  |
| 2687 | 1 | 3 | -1.050000 | -10.091865415 | 15.513833707  | 1.856176368   | 1 | 0 | 0 | # | ob  |
| 2688 | 1 | 3 | -1.050000 | -7.517912729  | 15.517136431  | 6.084357725   | 1 | 0 | 0 | # | ob  |
| 2689 | 1 | 5 | 2.100000  | -9.448596523  | -16.047600962 | 3.452486522   | 1 | 1 | 0 | # | st  |
| 2690 | 1 | 5 | 2.100000  | -6.876570783  | -16.038619659 | 7.680379551   | 1 | 1 | 0 | # | st  |
| 2691 | 1 | 5 | 2.100000  | -5.953223949  | 16.130136608  | 0.744074984   | 1 | 0 | 0 | # | st  |
| 2692 | 1 | 5 | 2.100000  | -8.611866039  | 16.127439967  | 2.131278354   | 1 | 0 | 0 | # | st  |
| 2693 | 1 | 5 | 2.100000  | -6.039449750  | 16.136517420  | 6.359024273   | 1 | 0 | 0 | # | st  |
| 2694 | 1 | 5 | 2.100000  | -9.535321161  | -16.041150089 | 0.617961151   | 1 | 1 | 0 | # | st  |
| 2695 | 1 | 5 | 2.100000  | -6.946927332  | -16.044802575 | 4.839744045   | 1 | 1 | 0 | # | st  |
| 2696 | 1 | 5 | 2.100000  | -8.541181255  | 16.133504185  | 4.971778212   | 1 | 0 | 0 | # | st  |
| 2697 | 1 | 1 | 1.575000  | -7.760648102  | -18.710342674 | 14.792747493  | 1 | 1 | 0 | # | ao  |
| 2698 | 1 | 1 | 1.575000  | -5.173508114  | -18.720367335 | 10.569647493  | 1 | 1 | 0 | # | ao  |
| 2699 | 1 | 1 | 1.575000  | -10.315124157 | -18.727185446 | 16.141210963  | 1 | 1 | 0 | # | ao  |
| 2700 | 1 | 1 | 1.575000  | -7.728120700  | -18.737173074 | 11.918102305  | 1 | 1 | 0 | # | ao  |
| 2701 | 1 | 2 | 0.425000  | -7.209244145  | -17.343036629 | 9.911451013   | 1 | 1 | 0 | # | ho  |
| 2702 | 1 | 2 | 0.425000  | -9.779677472  | -17.244695847 | 14.180912462  | 1 | 1 | 0 | # | ho  |
| 2703 | 1 | 2 | 0.425000  | -5.707935677  | 17.337409910  | 12.532201022  | 1 | 0 | 0 | # | ho  |
| 2704 | 1 | 2 | 0.425000  | -8.279532585  | 17.431442661  | 16.799025190  | 1 | 0 | 0 | # | ho  |
| 2705 | 1 | 3 | -1.050000 | -8.351279233  | 17.750750650  | 13.358380749  | 1 | 0 | 0 | # | ob  |
| 2706 | 1 | 3 | -1.050000 | -8.736316052  | 17.758665989  | 10.673429865  | 1 | 0 | 0 | # | ob  |
| 2707 | 1 | 3 | -1.050000 | -6.162779590  | 17.765964470  | 14.907177115  | 1 | 0 | 0 | # | ob  |
| 2708 | 1 | 3 | -1.050000 | -8.105849550  | 15.513870541  | 11.985412584  | 1 | 0 | 0 | # | ob  |
| 2709 | 1 | 6 | -0.950000 | -5.521265058  | 15.514671910  | -17.594048299 | 1 | 0 | 0 | # | oht |
| 2710 | 1 | 3 | -1.050000 | -9.718994217  | -17.660039116 | 9.130033991   | 1 | 1 | 0 | # | ob  |
| 2711 | 1 | 3 | -1.050000 | -7.137424505  | -17.661884485 | 13.352451743  | 1 | 1 | 0 | # | ob  |
| 2712 | 1 | 3 | -1.050000 | -7.970074866  | -15.428256828 | 12.176747445  | 1 | 1 | 0 | # | ob  |
| 2713 | 1 | 3 | -1.050000 | -5.396657334  | -15.424740091 | 16.405069793  | 1 | 1 | 0 | # | ob  |
| 2714 | 1 | 3 | -1.050000 | -9.967000490  | -15.425454729 | 10.506543562  | 1 | 1 | 0 | # | ob  |
| 2715 | 1 | 3 | -1.050000 | -7.382440482  | -15.425177613 | 14.725300930  | 1 | 1 | 0 | # | ob  |
| 2716 | 1 | 4 | -0.950000 | -9.351782553  | -17.738142618 | 14.905911812  | 1 | 1 | 0 | # | oh  |
| 2717 | 1 | 4 | -0.950000 | -6.766529560  | -17.750835269 | 10.678860000  | 1 | 1 | 0 | # | oh  |
| 2718 | 1 | 3 | -1.050000 | -7.956609054  | -15.701706791 | 8.867196118   | 1 | 1 | 0 | # | ob  |
| 2719 | 1 | 3 | -1.050000 | -5.362324007  | -15.717859730 | 13.098538892  | 1 | 1 | 0 | # | ob  |
| 2720 | 1 | 7 | -0.950000 | -8.722234277  | 17.839710067  | 16.031829270  | 1 | 0 | 0 | # | oho |
| 2721 | 1 | 3 | -1.050000 | -10.125648515 | 15.806346611  | 13.612516698  | 1 | 0 | 0 | # | ob  |
| 2722 | 1 | 4 | -0.950000 | -6.136623532  | 17.827436781  | 11.805359607  | 1 | 0 | 0 | # | oh  |
| 2723 | 1 | 3 | -1.050000 | -7.531930266  | 15.790522954  | 9.393964434   | 1 | 0 | 0 | # | ob  |
| 2724 | 1 | 3 | -1.050000 | -9.325662728  | -17.677041387 | 11.803442278  | 1 | 1 | 0 | # | ob  |
| 2725 | 1 | 3 | -1.050000 | -6.752114866  | -17.669834762 | 16.037475661  | 1 | 1 | 0 | # | ob  |
| 2726 | 1 | 3 | -1.050000 | -5.769762377  | 17.749076708  | 9.131339972   | 1 | 0 | 0 | # | ob  |
| 2727 | 1 | 3 | -1.050000 | -10.091865415 | 15.513833707  | 10.305776368  | 1 | 0 | 0 | # | ob  |
| 2728 | 1 | 3 | -1.050000 | -7.517912729  | 15.517136431  | 14.533957725  | 1 | 0 | 0 | # | ob  |
| 2729 | 1 | 5 | 2.100000  | -9.448596523  | -16.047600962 | 11.902086522  | 1 | 1 | 0 | # | st  |
| 2730 | 1 | 5 | 2.100000  | -6.876570783  | -16.038619659 | 16.129979551  | 1 | 1 | 0 | # | st  |
| 2731 | 1 | 5 | 2.100000  | -5.953223949  | 16.130136608  | 9.193674984   | 1 | 0 | 0 | # | st  |
| 2732 | 1 | 5 | 2.100000  | -8.611866039  | 16.127439967  | 10.580878354  | 1 | 0 | 0 | # | st  |
| 2733 | 1 | 5 | 2.100000  | -6.039449750  | 16.136517420  | 14.808624273  | 1 | 0 | 0 | # | st  |
| 2734 | 1 | 5 | 2.100000  | -9.535321161  | -16.041150089 | 9.067561151   | 1 | 1 | 0 | # | st  |
| 2735 | 1 | 5 | 2.100000  | -6.946927332  | -16.044802575 | 13.289344045  | 1 | 1 | 0 | # | st  |
| 2736 | 1 | 5 | 2.100000  | -8.541181255  | 16.133504185  | 13.421378212  | 1 | 0 | 0 | # | st  |
| 2737 | 1 | 1 | 1.575000  | -7.760648102  | -18.710342674 | -10.556052507 | 1 | 1 | 0 | # | ao  |
| 2738 | 1 | 1 | 1.575000  | -5.173508114  | -18.720367335 | -14.779152507 | 1 | 1 | 0 | # | ao  |
| 2739 | 1 | 1 | 1.575000  | -10.315124157 | -18.727185446 | -9.207589037  | 1 | 1 | 0 | # | ao  |
| 2740 | 1 | 1 | 1.575000  | -7.728120700  | -18.737173074 | -13.430697695 | 1 | 1 | 0 | # | ao  |
| 2741 | 1 | 2 | 0.425000  | -7.209244145  | -17.343036629 | -15.437348987 | 1 | 1 | 0 | # | ho  |
| 2742 | 1 | 2 | 0.425000  | -9.779677472  | -17.244695847 | -11.167887538 | 1 | 1 | 0 | # | ho  |

|      |   |   |           |               |               |               |   |   |   |   |     |
|------|---|---|-----------|---------------|---------------|---------------|---|---|---|---|-----|
| 2743 | 1 | 2 | 0.425000  | -5.707935677  | 17.337409910  | -12.816598978 | 1 | 0 | 0 | # | ho  |
| 2744 | 1 | 2 | 0.425000  | -8.279532585  | 17.431442661  | -8.549774810  | 1 | 0 | 0 | # | ho  |
| 2745 | 1 | 3 | -1.050000 | -8.351279233  | 17.750750650  | -11.990419251 | 1 | 0 | 0 | # | ob  |
| 2746 | 1 | 3 | -1.050000 | -8.736316052  | 17.758665989  | -14.675370135 | 1 | 0 | 0 | # | ob  |
| 2747 | 1 | 3 | -1.050000 | -6.162779590  | 17.765964470  | -10.441622885 | 1 | 0 | 0 | # | ob  |
| 2748 | 1 | 3 | -1.050000 | -8.105849550  | 15.513870541  | -13.363387416 | 1 | 0 | 0 | # | ob  |
| 2749 | 1 | 3 | -1.050000 | -5.521256058  | 15.514671910  | -9.144448299  | 1 | 0 | 0 | # | ob  |
| 2750 | 1 | 3 | -1.050000 | -9.718994217  | -17.660039116 | 17.579633991  | 1 | 1 | 0 | # | ob  |
| 2751 | 1 | 3 | -1.050000 | -7.137424505  | -17.661884485 | -11.996348257 | 1 | 1 | 0 | # | ob  |
| 2752 | 1 | 3 | -1.050000 | -7.970074866  | -15.428256828 | -13.172052555 | 1 | 1 | 0 | # | ob  |
| 2753 | 1 | 3 | -1.050000 | -5.396657334  | -15.424740091 | -8.943730207  | 1 | 1 | 0 | # | ob  |
| 2754 | 1 | 6 | -0.950000 | -9.967000490  | -15.425454729 | 18.956143562  | 1 | 1 | 0 | # | oht |
| 2755 | 1 | 3 | -1.050000 | -7.382440482  | -15.425177613 | -10.623499070 | 1 | 1 | 0 | # | ob  |
| 2756 | 1 | 4 | -0.950000 | -9.351782553  | -17.738142618 | -10.442888188 | 1 | 1 | 0 | # | oh  |
| 2757 | 1 | 7 | -0.950000 | -6.766529560  | -17.750835269 | -14.669940000 | 1 | 1 | 0 | # | oho |
| 2758 | 1 | 3 | -1.050000 | -7.956609054  | -15.701706791 | 17.316796118  | 1 | 1 | 0 | # | ob  |
| 2759 | 1 | 3 | -1.050000 | -5.362234007  | -15.717859730 | -12.250261108 | 1 | 1 | 0 | # | ob  |
| 2760 | 1 | 4 | -0.950000 | -8.722234277  | 17.839710067  | -9.316970730  | 1 | 0 | 0 | # | oh  |
| 2761 | 1 | 3 | -1.050000 | -10.125648515 | 15.806346611  | -11.736283302 | 1 | 0 | 0 | # | ob  |
| 2762 | 1 | 4 | -0.950000 | -6.136623532  | 17.827436781  | -13.543440393 | 1 | 0 | 0 | # | oh  |
| 2763 | 1 | 3 | -1.050000 | -7.531930266  | 15.790522954  | -15.954835566 | 1 | 0 | 0 | # | ob  |
| 2764 | 1 | 3 | -1.050000 | -9.325662728  | -17.677041387 | -13.545357722 | 1 | 1 | 0 | # | ob  |
| 2765 | 1 | 3 | -1.050000 | -6.752114866  | -17.669834762 | -9.311324339  | 1 | 1 | 0 | # | ob  |
| 2766 | 1 | 3 | -1.050000 | -5.769762377  | 17.749076708  | -16.217460028 | 1 | 0 | 0 | # | ob  |
| 2767 | 1 | 3 | -1.050000 | -10.091865415 | 15.513833707  | -15.043023632 | 1 | 0 | 0 | # | ob  |
| 2768 | 1 | 3 | -1.050000 | -7.517912729  | 15.517136431  | -10.814842275 | 1 | 0 | 0 | # | ob  |
| 2769 | 1 | 5 | 2.100000  | -9.448596523  | -16.047600962 | -13.446713478 | 1 | 1 | 0 | # | st  |
| 2770 | 1 | 5 | 2.100000  | -6.876570783  | -16.038619659 | -9.218820449  | 1 | 1 | 0 | # | st  |
| 2771 | 1 | 5 | 2.100000  | -5.953223949  | 16.130136608  | -16.155125016 | 1 | 0 | 0 | # | st  |
| 2772 | 1 | 5 | 2.100000  | -8.611866039  | 16.127439967  | -14.767921646 | 1 | 0 | 0 | # | st  |
| 2773 | 1 | 5 | 2.100000  | -6.039449750  | 16.136517420  | -10.540175727 | 1 | 0 | 0 | # | st  |
| 2774 | 1 | 5 | 2.100000  | -9.535321161  | -16.041150089 | 17.517161151  | 1 | 1 | 0 | # | st  |
| 2775 | 1 | 5 | 2.100000  | -6.946927332  | -16.044802575 | -12.059455955 | 1 | 1 | 0 | # | st  |
| 2776 | 1 | 5 | 2.100000  | -8.541181255  | 16.133504185  | -11.927421788 | 1 | 0 | 0 | # | st  |
| 2777 | 1 | 1 | 1.575000  | -7.760648102  | -18.710342674 | -2.106452507  | 1 | 1 | 0 | # | ao  |
| 2778 | 1 | 1 | 1.575000  | -5.173508114  | -18.720367335 | -6.329552507  | 1 | 1 | 0 | # | ao  |
| 2779 | 1 | 1 | 1.575000  | -10.315124157 | -18.727185446 | -0.757989037  | 1 | 1 | 0 | # | ao  |
| 2780 | 1 | 1 | 1.575000  | -7.728120700  | -18.737173074 | -4.981097695  | 1 | 1 | 0 | # | ao  |
| 2781 | 1 | 2 | 0.425000  | -7.209244145  | -17.343036629 | -6.987748987  | 1 | 1 | 0 | # | ho  |
| 2782 | 1 | 2 | 0.425000  | -9.779677472  | -17.244695847 | -2.718287538  | 1 | 1 | 0 | # | ho  |
| 2783 | 1 | 2 | 0.425000  | -5.707935677  | 17.337409910  | -4.366998978  | 1 | 0 | 0 | # | ho  |
| 2784 | 1 | 2 | 0.425000  | -8.279532585  | 17.431442661  | -0.100174810  | 1 | 0 | 0 | # | ho  |
| 2785 | 1 | 3 | -1.050000 | -8.351279233  | 17.750750650  | -3.540819251  | 1 | 0 | 0 | # | ob  |
| 2786 | 1 | 3 | -1.050000 | -8.736316052  | 17.758665989  | -6.225770135  | 1 | 0 | 0 | # | ob  |
| 2787 | 1 | 3 | -1.050000 | -6.162779590  | 17.765964470  | -1.992022885  | 1 | 0 | 0 | # | ob  |
| 2788 | 1 | 3 | -1.050000 | -8.105849550  | 15.513870541  | -4.913787416  | 1 | 0 | 0 | # | ob  |
| 2789 | 1 | 3 | -1.050000 | -5.521256058  | 15.514671910  | -0.694848299  | 1 | 0 | 0 | # | ob  |
| 2790 | 1 | 3 | -1.050000 | -9.718994217  | -17.660039116 | -7.769166009  | 1 | 1 | 0 | # | ob  |
| 2791 | 1 | 3 | -1.050000 | -7.137424505  | -17.661884485 | -3.546748257  | 1 | 1 | 0 | # | ob  |
| 2792 | 1 | 3 | -1.050000 | -7.970074866  | -15.428256828 | -4.722452555  | 1 | 1 | 0 | # | ob  |
| 2793 | 1 | 3 | -1.050000 | -5.396657334  | -15.424740091 | -0.494130207  | 1 | 1 | 0 | # | ob  |
| 2794 | 1 | 3 | -1.050000 | -9.967000490  | -15.425454729 | -6.392656438  | 1 | 1 | 0 | # | ob  |
| 2795 | 1 | 3 | -1.050000 | -7.382440482  | -15.425177613 | -2.173899070  | 1 | 1 | 0 | # | ob  |
| 2796 | 1 | 4 | -0.950000 | -9.351782553  | -17.738142618 | -1.993288188  | 1 | 1 | 0 | # | oh  |
| 2797 | 1 | 4 | -0.950000 | -6.766529560  | -17.750835269 | -6.220340000  | 1 | 1 | 0 | # | oh  |
| 2798 | 1 | 3 | -1.050000 | -7.956609054  | -15.701706791 | -8.032003882  | 1 | 1 | 0 | # | ob  |
| 2799 | 1 | 3 | -1.050000 | -5.362234007  | -15.717859730 | -3.800661108  | 1 | 1 | 0 | # | ob  |
| 2800 | 1 | 4 | -0.950000 | -8.722234277  | 17.839710067  | -0.867370730  | 1 | 0 | 0 | # | oh  |
| 2801 | 1 | 3 | -1.050000 | -10.125648515 | 15.806346611  | -3.286683302  | 1 | 0 | 0 | # | ob  |
| 2802 | 1 | 4 | -0.950000 | -6.136623532  | 17.827436781  | -5.093840393  | 1 | 0 | 0 | # | oh  |
| 2803 | 1 | 3 | -1.050000 | -7.531930266  | 15.790522954  | -7.505235566  | 1 | 0 | 0 | # | ob  |
| 2804 | 1 | 3 | -1.050000 | -9.325662728  | -17.677041387 | -5.095757722  | 1 | 1 | 0 | # | ob  |
| 2805 | 1 | 3 | -1.050000 | -6.752114866  | -17.669834762 | -0.861724339  | 1 | 1 | 0 | # | ob  |
| 2806 | 1 | 3 | -1.050000 | -5.769762377  | 17.749076708  | -7.767860028  | 1 | 0 | 0 | # | ob  |
| 2807 | 1 | 3 | -1.050000 | -10.091865415 | 15.513833707  | -6.593423632  | 1 | 0 | 0 | # | ob  |
| 2808 | 1 | 3 | -1.050000 | -7.517912729  | 15.517136431  | -2.365242275  | 1 | 0 | 0 | # | ob  |
| 2809 | 1 | 5 | 2.100000  | -9.448596523  | -16.047600962 | -4.997113478  | 1 | 1 | 0 | # | st  |
| 2810 | 1 | 5 | 2.100000  | -6.876570783  | -16.038619659 | -0.769220449  | 1 | 1 | 0 | # | st  |
| 2811 | 1 | 5 | 2.100000  | -5.953223949  | 16.130136608  | -7.705525016  | 1 | 0 | 0 | # | st  |
| 2812 | 1 | 5 | 2.100000  | -8.611866039  | 16.127439967  | -6.318321646  | 1 | 0 | 0 | # | st  |
| 2813 | 1 | 5 | 2.100000  | -6.039449750  | 16.136517420  | -2.090575727  | 1 | 0 | 0 | # | st  |
| 2814 | 1 | 5 | 2.100000  | -9.535321161  | -16.041150089 | -7.831638849  | 1 | 1 | 0 | # | st  |
| 2815 | 1 | 5 | 2.100000  | -6.946927332  | -16.044802575 | -3.609855955  | 1 | 1 | 0 | # | st  |
| 2816 | 1 | 5 | 2.100000  | -8.541181255  | 16.133504185  | -3.477821788  | 1 | 0 | 0 | # | st  |
| 2817 | 1 | 6 | -0.950000 | -5.479548817  | 16.134128849  | 16.634714390  | 1 | 0 | 0 | # | oht |
| 2818 | 1 | 6 | -0.950000 | -9.735393535  | -15.806715341 | -15.319631379 | 1 | 1 | 0 | # | oht |
| 2819 | 1 | 2 | 0.425000  | -9.895636833  | -15.689544923 | -16.411736324 | 1 | 1 | 0 | # | ho  |
| 2820 | 1 | 2 | 0.425000  | -5.314810057  | 15.784241026  | -18.650841835 | 1 | 0 | 0 | # | ho  |
| 2821 | 1 | 2 | 0.425000  | -9.890161041  | -15.518101635 | 20.059598264  | 1 | 1 | 0 | # | ho  |
| 2822 | 1 | 2 | 0.425000  | -5.867766564  | 16.234513767  | 17.669755394  | 1 | 0 | 0 | # | ho  |
| 2823 | 1 | 1 | 1.575000  | -2.597848102  | -18.710342674 | 6.343147493   | 1 | 1 | 0 | # | ao  |
| 2824 | 1 | 1 | 1.575000  | -0.010708114  | -18.720367335 | 2.120047493   | 1 | 1 | 0 | # | ao  |
| 2825 | 1 | 1 | 1.575000  | -5.152324157  | -18.727185446 | 7.691610963   | 1 | 1 | 0 | # | ao  |
| 2826 | 1 | 1 | 1.575000  | -2.565320700  | -18.737173074 | 3.468502305   | 1 | 1 | 0 | # | ao  |
| 2827 | 1 | 2 | 0.425000  | -2.046444145  | -17.343036629 | 1.461851013   | 1 | 1 | 0 | # | ho  |
| 2828 | 1 | 2 | 0.425000  | -4.616877472  | -17.244695847 | 5.731312462   | 1 | 1 | 0 | # | ho  |
| 2829 | 1 | 2 | 0.425000  | -0.545135677  | 17.337409910  | 4.082601022   | 1 | 0 | 0 | # | ho  |
| 2830 | 1 | 2 | 0.425000  | -3.116732585  | 17.431442661  | 8.349425190   | 1 | 0 | 0 | # | ho  |
| 2831 | 1 | 3 | -1.050000 | -3.188479233  | 17.750750650  | 4.908780749   | 1 | 0 | 0 | # | ob  |
| 2832 | 1 | 3 | -1.050000 | -3.573516052  | 17.758665989  | 2.223829865   | 1 | 0 | 0 | # | ob  |
| 2833 | 1 | 3 | -1.050000 | -0.999979590  | 17.765964470  | 6.457577115   | 1 | 0 | 0 | # | ob  |
| 2834 | 1 | 3 | -1.050000 | -2.943049550  | 15.513870541  | 3.535812584   | 1 | 0 | 0 | # | ob  |
| 2835 | 1 | 3 | -1.050000 | -0.358456058  | 15.514671910  | 7.754751701   | 1 | 0 | 0 | # | ob  |

|      |   |   |           |              |               |               |   |   |   |   |     |
|------|---|---|-----------|--------------|---------------|---------------|---|---|---|---|-----|
| 2836 | 1 | 3 | -1.050000 | -4.556194217 | -17.660039116 | 0.680433991   | 1 | 1 | 0 | # | ob  |
| 2837 | 1 | 3 | -1.050000 | -1.974624505 | -17.661884485 | 4.902851743   | 1 | 1 | 0 | # | ob  |
| 2838 | 1 | 3 | -1.050000 | -2.807274866 | -15.428256828 | 3.727147445   | 1 | 1 | 0 | # | ob  |
| 2839 | 1 | 3 | -1.050000 | -0.233857334 | -15.424740091 | 7.955469793   | 1 | 1 | 0 | # | ob  |
| 2840 | 1 | 3 | -1.050000 | -4.804200490 | -15.425454729 | 2.056943562   | 1 | 1 | 0 | # | ob  |
| 2841 | 1 | 3 | -1.050000 | -2.219640482 | -15.425177613 | 6.275700930   | 1 | 1 | 0 | # | ob  |
| 2842 | 1 | 4 | -0.950000 | -4.188982553 | -17.738142618 | 6.456311812   | 1 | 1 | 0 | # | oh  |
| 2843 | 1 | 4 | -0.950000 | -1.603729560 | -17.750835269 | 2.229260000   | 1 | 1 | 0 | # | oh  |
| 2844 | 1 | 3 | -1.050000 | -2.793809054 | -15.701706791 | 0.417596118   | 1 | 1 | 0 | # | ob  |
| 2845 | 1 | 3 | -1.050000 | -0.199524007 | -15.717859730 | 4.648938892   | 1 | 1 | 0 | # | ob  |
| 2846 | 1 | 4 | -0.950000 | -3.559434277 | 17.839710067  | 7.582229270   | 1 | 0 | 0 | # | oh  |
| 2847 | 1 | 3 | -1.050000 | -4.962848515 | 15.806346611  | 5.162916698   | 1 | 0 | 0 | # | ob  |
| 2848 | 1 | 4 | -0.950000 | -0.973823532 | 17.827436781  | 3.355759607   | 1 | 0 | 0 | # | oh  |
| 2849 | 1 | 3 | -1.050000 | -2.369130266 | 15.790522954  | 0.944364434   | 1 | 0 | 0 | # | ob  |
| 2850 | 1 | 3 | -1.050000 | -4.162862728 | -17.677041387 | 3.353842278   | 1 | 1 | 0 | # | ob  |
| 2851 | 1 | 3 | -1.050000 | -1.589314866 | -17.669834762 | 7.587875661   | 1 | 1 | 0 | # | ob  |
| 2852 | 1 | 3 | -1.050000 | -0.606962377 | 17.749076708  | 0.681739972   | 1 | 0 | 0 | # | ob  |
| 2853 | 1 | 3 | -1.050000 | -4.929065415 | 15.513833707  | 1.856176368   | 1 | 0 | 0 | # | ob  |
| 2854 | 1 | 3 | -1.050000 | -2.355112729 | 15.517136431  | 6.084357725   | 1 | 0 | 0 | # | ob  |
| 2855 | 1 | 5 | 2.100000  | -4.285796523 | -16.047600962 | 3.452486522   | 1 | 1 | 0 | # | st  |
| 2856 | 1 | 5 | 2.100000  | -1.713770783 | -16.038619659 | 7.680379551   | 1 | 1 | 0 | # | st  |
| 2857 | 1 | 5 | 2.100000  | -0.790423949 | 16.130136608  | 0.744074984   | 1 | 0 | 0 | # | st  |
| 2858 | 1 | 5 | 2.100000  | -3.449066039 | 16.127439967  | 2.131278354   | 1 | 0 | 0 | # | st  |
| 2859 | 1 | 5 | 2.100000  | -0.876649750 | 16.136517420  | 6.359024273   | 1 | 0 | 0 | # | st  |
| 2860 | 1 | 5 | 2.100000  | -4.372521161 | -16.041150089 | 0.617961151   | 1 | 1 | 0 | # | st  |
| 2861 | 1 | 5 | 2.100000  | -1.784127332 | -16.044802575 | 4.839744045   | 1 | 1 | 0 | # | st  |
| 2862 | 1 | 5 | 2.100000  | -3.378381255 | 16.133504185  | 4.971778212   | 1 | 0 | 0 | # | st  |
| 2863 | 1 | 1 | 1.575000  | -2.597848102 | -18.710342674 | 14.792747493  | 1 | 1 | 0 | # | ao  |
| 2864 | 1 | 1 | 1.575000  | -0.010708114 | -18.720367335 | 10.569647493  | 1 | 1 | 0 | # | ao  |
| 2865 | 1 | 1 | 1.575000  | -5.152324157 | -18.727185446 | 16.141210963  | 1 | 1 | 0 | # | ao  |
| 2866 | 1 | 1 | 1.575000  | -2.565320700 | -18.737173074 | 11.918102305  | 1 | 1 | 0 | # | ao  |
| 2867 | 1 | 2 | 0.425000  | -2.046444145 | -17.343036629 | 9.911451013   | 1 | 1 | 0 | # | ho  |
| 2868 | 1 | 2 | 0.425000  | -4.616877472 | -17.244695847 | 14.180912462  | 1 | 1 | 0 | # | ho  |
| 2869 | 1 | 2 | 0.425000  | -0.545135677 | 17.337409910  | 12.532201022  | 1 | 0 | 0 | # | ho  |
| 2870 | 1 | 2 | 0.425000  | -3.116732585 | 17.431442661  | 16.799025190  | 1 | 0 | 0 | # | ho  |
| 2871 | 1 | 3 | -1.050000 | -3.188479233 | 17.750750650  | 13.358380749  | 1 | 0 | 0 | # | ob  |
| 2872 | 1 | 3 | -1.050000 | -3.573516052 | 17.758665989  | 10.673429865  | 1 | 0 | 0 | # | ob  |
| 2873 | 1 | 3 | -1.050000 | -0.999979590 | 17.765964470  | 14.907177115  | 1 | 0 | 0 | # | ob  |
| 2874 | 1 | 3 | -1.050000 | -2.943049550 | 15.513870541  | 11.985412584  | 1 | 0 | 0 | # | ob  |
| 2875 | 1 | 6 | -0.950000 | -0.358456058 | 15.514671910  | -17.594048299 | 1 | 0 | 0 | # | oht |
| 2876 | 1 | 3 | -1.050000 | -4.556194217 | -17.660039116 | 9.130033991   | 1 | 1 | 0 | # | ob  |
| 2877 | 1 | 3 | -1.050000 | -1.974624505 | -17.661884485 | 13.352451743  | 1 | 1 | 0 | # | ob  |
| 2878 | 1 | 3 | -1.050000 | -2.807274866 | -15.428256828 | 12.176747445  | 1 | 1 | 0 | # | ob  |
| 2879 | 1 | 3 | -1.050000 | -0.233857334 | -15.424740091 | 16.405069793  | 1 | 1 | 0 | # | ob  |
| 2880 | 1 | 3 | -1.050000 | -4.804200490 | -15.425454729 | 10.506543562  | 1 | 1 | 0 | # | ob  |
| 2881 | 1 | 3 | -1.050000 | -2.219640482 | -15.425177613 | 14.725300930  | 1 | 1 | 0 | # | ob  |
| 2882 | 1 | 4 | -0.950000 | -4.188982553 | -17.738142618 | 14.905911812  | 1 | 1 | 0 | # | oh  |
| 2883 | 1 | 4 | -0.950000 | -1.603729560 | -17.750835269 | 10.678860000  | 1 | 1 | 0 | # | oh  |
| 2884 | 1 | 3 | -1.050000 | -2.793809054 | -15.701706791 | 8.867196118   | 1 | 1 | 0 | # | ob  |
| 2885 | 1 | 3 | -1.050000 | -0.199524007 | -15.717859730 | 13.098538892  | 1 | 1 | 0 | # | ob  |
| 2886 | 1 | 7 | -0.950000 | -3.559434277 | 17.839710067  | 16.031829270  | 1 | 0 | 0 | # | oho |
| 2887 | 1 | 3 | -1.050000 | -4.962848515 | 15.806346611  | 13.612516698  | 1 | 0 | 0 | # | ob  |
| 2888 | 1 | 4 | -0.950000 | -0.973823532 | 17.827436781  | 11.805359607  | 1 | 0 | 0 | # | oh  |
| 2889 | 1 | 3 | -1.050000 | -2.369130266 | 15.790522954  | 9.393964434   | 1 | 0 | 0 | # | ob  |
| 2890 | 1 | 3 | -1.050000 | -4.162862728 | -17.677041387 | 11.803442278  | 1 | 1 | 0 | # | ob  |
| 2891 | 1 | 3 | -1.050000 | -1.589314866 | -17.669834762 | 16.037475661  | 1 | 1 | 0 | # | ob  |
| 2892 | 1 | 3 | -1.050000 | -0.606962377 | 17.749076708  | 9.131339972   | 1 | 0 | 0 | # | ob  |
| 2893 | 1 | 3 | -1.050000 | -4.929065415 | 15.513833707  | 10.305776368  | 1 | 0 | 0 | # | ob  |
| 2894 | 1 | 3 | -1.050000 | -2.355112729 | 15.517136431  | 14.533957725  | 1 | 0 | 0 | # | ob  |
| 2895 | 1 | 5 | 2.100000  | -4.285796523 | -16.047600962 | 11.902086522  | 1 | 1 | 0 | # | st  |
| 2896 | 1 | 5 | 2.100000  | -1.713770783 | -16.038619659 | 16.129979551  | 1 | 1 | 0 | # | st  |
| 2897 | 1 | 5 | 2.100000  | -0.790423949 | 16.130136608  | 9.193674984   | 1 | 0 | 0 | # | st  |
| 2898 | 1 | 5 | 2.100000  | -3.449066039 | 16.127439967  | 10.580878354  | 1 | 0 | 0 | # | st  |
| 2899 | 1 | 5 | 2.100000  | -0.876649750 | 16.136517420  | 14.808624273  | 1 | 0 | 0 | # | st  |
| 2900 | 1 | 5 | 2.100000  | -4.372521161 | -16.041150089 | 9.067561151   | 1 | 1 | 0 | # | st  |
| 2901 | 1 | 5 | 2.100000  | -1.784127332 | -16.044802575 | 13.289344045  | 1 | 1 | 0 | # | st  |
| 2902 | 1 | 5 | 2.100000  | -3.378381255 | 16.133504185  | 13.421378212  | 1 | 0 | 0 | # | st  |
| 2903 | 1 | 1 | 1.575000  | -2.597848102 | -18.710342674 | -10.556052507 | 1 | 1 | 0 | # | ao  |
| 2904 | 1 | 1 | 1.575000  | -0.010708114 | -18.720367335 | -14.779152507 | 1 | 1 | 0 | # | ao  |
| 2905 | 1 | 1 | 1.575000  | -5.152324157 | -18.727185446 | -9.207589037  | 1 | 1 | 0 | # | ao  |
| 2906 | 1 | 1 | 1.575000  | -2.565320700 | -18.737173074 | -13.430697695 | 1 | 1 | 0 | # | ao  |
| 2907 | 1 | 2 | 0.425000  | -2.046444145 | -17.343036629 | -15.437348987 | 1 | 1 | 0 | # | ho  |
| 2908 | 1 | 2 | 0.425000  | -4.616877472 | -17.244695847 | -11.167887538 | 1 | 1 | 0 | # | ho  |
| 2909 | 1 | 2 | 0.425000  | -0.545135677 | 17.337409910  | -12.816598978 | 1 | 0 | 0 | # | ho  |
| 2910 | 1 | 2 | 0.425000  | -3.116732585 | 17.431442661  | -8.549774810  | 1 | 0 | 0 | # | ho  |
| 2911 | 1 | 3 | -1.050000 | -3.188479233 | 17.750750650  | -11.990419251 | 1 | 0 | 0 | # | ob  |
| 2912 | 1 | 3 | -1.050000 | -3.573516052 | 17.758665989  | -14.675370135 | 1 | 0 | 0 | # | ob  |
| 2913 | 1 | 3 | -1.050000 | -0.999979590 | 17.765964470  | -10.441622885 | 1 | 0 | 0 | # | ob  |
| 2914 | 1 | 3 | -1.050000 | -2.943049550 | 15.513870541  | -13.363387416 | 1 | 0 | 0 | # | ob  |
| 2915 | 1 | 3 | -1.050000 | -0.358456058 | 15.514671910  | -9.144448299  | 1 | 0 | 0 | # | ob  |
| 2916 | 1 | 3 | -1.050000 | -4.556194217 | -17.660039116 | 17.579633991  | 1 | 1 | 0 | # | ob  |
| 2917 | 1 | 3 | -1.050000 | -1.974624505 | -17.661884485 | -11.996348257 | 1 | 1 | 0 | # | ob  |
| 2918 | 1 | 3 | -1.050000 | -2.807274866 | -15.428256828 | -13.172052555 | 1 | 1 | 0 | # | ob  |
| 2919 | 1 | 3 | -1.050000 | -0.233857334 | -15.424740091 | -8.943730207  | 1 | 1 | 0 | # | ob  |
| 2920 | 1 | 6 | -0.950000 | -4.804200490 | -15.425454729 | 18.956143562  | 1 | 1 | 0 | # | oht |
| 2921 | 1 | 3 | -1.050000 | -2.219640482 | -15.425177613 | -10.623499070 | 1 | 1 | 0 | # | ob  |
| 2922 | 1 | 4 | -0.950000 | -4.188982553 | -17.738142618 | -10.442888188 | 1 | 1 | 0 | # | oh  |
| 2923 | 1 | 7 | -0.950000 | -1.603729560 | -17.750835269 | -14.669940000 | 1 | 1 | 0 | # | oho |
| 2924 | 1 | 3 | -1.050000 | -2.793809054 | -15.701706791 | 17.316796118  | 1 | 1 | 0 | # | ob  |
| 2925 | 1 | 3 | -1.050000 | -0.199524007 | -15.717859730 | -12.250261108 | 1 | 1 | 0 | # | ob  |
| 2926 | 1 | 4 | -0.950000 | -3.559434277 | 17.839710067  | -9.316970730  | 1 | 0 | 0 | # | oh  |
| 2927 | 1 | 3 | -1.050000 | -4.962848515 | 15.806346611  | -11.736283302 | 1 | 0 | 0 | # | ob  |
| 2928 | 1 | 4 | -0.950000 | -0.973823532 | 17.827436781  | -13.543440393 | 1 | 0 | 0 | # | oh  |

|      |   |   |           |              |               |               |   |   |   |   |     |
|------|---|---|-----------|--------------|---------------|---------------|---|---|---|---|-----|
| 2929 | 1 | 3 | -1.050000 | -2.369130266 | 15.790522954  | -15.954835566 | 1 | 0 | 0 | # | ob  |
| 2930 | 1 | 3 | -1.050000 | -4.162862728 | -17.677041387 | -13.545357722 | 1 | 1 | 0 | # | ob  |
| 2931 | 1 | 3 | -1.050000 | -1.589314866 | -17.669834762 | -9.311324339  | 1 | 1 | 0 | # | ob  |
| 2932 | 1 | 3 | -1.050000 | -0.606962377 | 17.749076708  | -16.217460028 | 1 | 0 | 0 | # | ob  |
| 2933 | 1 | 3 | -1.050000 | -4.929065415 | 15.513833707  | -15.043023632 | 1 | 0 | 0 | # | ob  |
| 2934 | 1 | 3 | -1.050000 | -2.355112729 | 15.517136431  | -10.814842275 | 1 | 0 | 0 | # | ob  |
| 2935 | 1 | 5 | 2.100000  | -4.285796523 | -16.047600962 | -13.446713478 | 1 | 1 | 0 | # | st  |
| 2936 | 1 | 5 | 2.100000  | -1.713770783 | -16.038619659 | -9.218820449  | 1 | 1 | 0 | # | st  |
| 2937 | 1 | 5 | 2.100000  | -0.790423949 | 16.130136608  | -16.155125016 | 1 | 0 | 0 | # | st  |
| 2938 | 1 | 5 | 2.100000  | -3.449066039 | 16.127439967  | -14.767921646 | 1 | 0 | 0 | # | st  |
| 2939 | 1 | 5 | 2.100000  | -0.876649750 | 16.136517420  | -10.540175727 | 1 | 0 | 0 | # | st  |
| 2940 | 1 | 5 | 2.100000  | -4.372521161 | -16.041150089 | 17.517161151  | 1 | 1 | 0 | # | st  |
| 2941 | 1 | 5 | 2.100000  | -1.784127332 | -16.044802575 | -12.059455955 | 1 | 1 | 0 | # | st  |
| 2942 | 1 | 5 | 2.100000  | -3.378381255 | 16.133504185  | -11.927421788 | 1 | 0 | 0 | # | st  |
| 2943 | 1 | 1 | 1.575000  | -2.597848102 | -18.710342674 | -2.106452507  | 1 | 1 | 0 | # | ao  |
| 2944 | 1 | 1 | 1.575000  | -0.010708114 | -18.720367335 | -6.329552507  | 1 | 1 | 0 | # | ao  |
| 2945 | 1 | 1 | 1.575000  | -5.152324157 | -18.727185446 | -0.757989037  | 1 | 1 | 0 | # | ao  |
| 2946 | 1 | 1 | 1.575000  | -2.565320700 | -18.737173074 | -4.981097695  | 1 | 1 | 0 | # | ao  |
| 2947 | 1 | 2 | 0.425000  | -2.046444145 | -17.343036629 | -6.987748987  | 1 | 1 | 0 | # | ho  |
| 2948 | 1 | 2 | 0.425000  | -4.616877472 | -17.244695847 | -2.718287538  | 1 | 1 | 0 | # | ho  |
| 2949 | 1 | 2 | 0.425000  | -0.545135677 | 17.337409910  | -4.366998978  | 1 | 0 | 0 | # | ho  |
| 2950 | 1 | 2 | 0.425000  | -3.116732585 | 17.431442661  | -0.100174810  | 1 | 0 | 0 | # | ho  |
| 2951 | 1 | 3 | -1.050000 | -3.188479233 | 17.750750650  | -3.540819251  | 1 | 0 | 0 | # | ob  |
| 2952 | 1 | 3 | -1.050000 | -3.573516052 | 17.758665989  | -6.225770135  | 1 | 0 | 0 | # | ob  |
| 2953 | 1 | 3 | -1.050000 | -0.999979590 | 17.765964470  | -1.992022885  | 1 | 0 | 0 | # | ob  |
| 2954 | 1 | 3 | -1.050000 | -2.943049550 | 15.513870541  | -4.913787416  | 1 | 0 | 0 | # | ob  |
| 2955 | 1 | 3 | -1.050000 | -0.358456058 | 15.514671910  | -0.694848299  | 1 | 0 | 0 | # | ob  |
| 2956 | 1 | 3 | -1.050000 | -4.556194217 | -17.660039116 | -7.769166009  | 1 | 1 | 0 | # | ob  |
| 2957 | 1 | 3 | -1.050000 | -1.974624505 | -17.661884485 | -3.546784257  | 1 | 1 | 0 | # | ob  |
| 2958 | 1 | 3 | -1.050000 | -2.807274866 | -15.428256828 | -4.722452555  | 1 | 1 | 0 | # | ob  |
| 2959 | 1 | 3 | -1.050000 | -0.233857334 | -15.424740091 | -0.494130207  | 1 | 1 | 0 | # | ob  |
| 2960 | 1 | 3 | -1.050000 | -4.804200490 | -15.425454729 | -6.392656438  | 1 | 1 | 0 | # | ob  |
| 2961 | 1 | 3 | -1.050000 | -2.219640482 | -15.425177613 | -2.173899070  | 1 | 1 | 0 | # | ob  |
| 2962 | 1 | 4 | -0.950000 | -4.188982553 | -17.738142618 | -1.993288188  | 1 | 1 | 0 | # | oh  |
| 2963 | 1 | 4 | -0.950000 | -1.603729560 | -17.750835269 | -6.220340000  | 1 | 1 | 0 | # | oh  |
| 2964 | 1 | 3 | -1.050000 | -2.793809054 | -15.701706791 | -8.032003882  | 1 | 1 | 0 | # | ob  |
| 2965 | 1 | 3 | -1.050000 | -0.199524007 | -15.717859730 | -3.800661108  | 1 | 1 | 0 | # | ob  |
| 2966 | 1 | 4 | -0.950000 | -3.559434277 | 17.839710067  | -0.867370730  | 1 | 0 | 0 | # | oh  |
| 2967 | 1 | 3 | -1.050000 | -4.962848515 | 15.806346611  | -3.286863302  | 1 | 0 | 0 | # | ob  |
| 2968 | 1 | 4 | -0.950000 | -0.973823532 | 17.827436781  | -5.093840393  | 1 | 0 | 0 | # | oh  |
| 2969 | 1 | 3 | -1.050000 | -2.369130266 | 15.790522954  | -7.505235566  | 1 | 0 | 0 | # | ob  |
| 2970 | 1 | 3 | -1.050000 | -4.162862728 | -17.677041387 | -5.095757722  | 1 | 1 | 0 | # | ob  |
| 2971 | 1 | 3 | -1.050000 | -1.589314866 | -17.669834762 | -0.861724339  | 1 | 1 | 0 | # | ob  |
| 2972 | 1 | 3 | -1.050000 | -0.606962377 | 17.749076708  | -7.767860028  | 1 | 0 | 0 | # | ob  |
| 2973 | 1 | 3 | -1.050000 | -4.929065415 | 15.513833707  | -6.593423632  | 1 | 0 | 0 | # | ob  |
| 2974 | 1 | 3 | -1.050000 | -2.355112729 | 15.517136431  | -2.365242275  | 1 | 0 | 0 | # | ob  |
| 2975 | 1 | 5 | 2.100000  | -4.285796523 | -16.047600962 | -4.997113478  | 1 | 1 | 0 | # | st  |
| 2976 | 1 | 5 | 2.100000  | -1.713770783 | -16.038619659 | -0.769220449  | 1 | 1 | 0 | # | st  |
| 2977 | 1 | 5 | 2.100000  | -0.790423949 | 16.130136608  | -7.705525016  | 1 | 0 | 0 | # | st  |
| 2978 | 1 | 5 | 2.100000  | -3.449066039 | 16.127439967  | -6.318321646  | 1 | 0 | 0 | # | st  |
| 2979 | 1 | 5 | 2.100000  | -0.876649750 | 16.136517420  | -2.090575727  | 1 | 0 | 0 | # | st  |
| 2980 | 1 | 5 | 2.100000  | -4.372521161 | -16.041150089 | -7.831638849  | 1 | 1 | 0 | # | st  |
| 2981 | 1 | 5 | 2.100000  | -1.784127332 | -16.044802575 | -3.609855955  | 1 | 1 | 0 | # | st  |
| 2982 | 1 | 5 | 2.100000  | -3.378381255 | 16.133504185  | -3.477821788  | 1 | 0 | 0 | # | st  |
| 2983 | 1 | 6 | -0.950000 | -0.316748817 | 16.134128849  | 16.634714390  | 1 | 0 | 0 | # | oht |
| 2984 | 1 | 6 | -0.950000 | -4.572593535 | -15.806715341 | -15.319631379 | 1 | 1 | 0 | # | oht |
| 2985 | 1 | 2 | 0.425000  | -4.732836833 | -15.689544923 | -16.411736324 | 1 | 1 | 0 | # | ho  |
| 2986 | 1 | 2 | 0.425000  | -0.152010057 | 15.784241026  | -18.650841835 | 1 | 0 | 0 | # | ho  |
| 2987 | 1 | 2 | 0.425000  | -4.727361041 | -15.518101635 | 20.059598264  | 1 | 1 | 0 | # | ho  |
| 2988 | 1 | 2 | 0.425000  | -0.704966564 | 16.234513767  | 17.669755394  | 1 | 0 | 0 | # | ho  |
| 2989 | 1 | 1 | 1.575000  | 2.564951898  | -9.326242674  | 6.343147493   | 0 | 1 | 0 | # | ao  |
| 2990 | 1 | 1 | 1.575000  | 5.152091886  | -9.336267335  | 2.120047493   | 0 | 1 | 0 | # | ao  |
| 2991 | 1 | 1 | 1.575000  | 0.010475843  | -9.343085446  | 7.691610963   | 0 | 1 | 0 | # | ao  |
| 2992 | 1 | 1 | 1.575000  | 2.597479300  | -9.353073074  | 3.468502305   | 0 | 1 | 0 | # | ao  |
| 2993 | 1 | 2 | 0.425000  | 3.116355855  | -7.958936629  | 1.461851013   | 0 | 1 | 0 | # | ho  |
| 2994 | 1 | 2 | 0.425000  | 0.545922528  | -7.860595847  | 5.731312462   | 0 | 1 | 0 | # | ho  |
| 2995 | 1 | 2 | 0.425000  | 4.617664323  | -10.814890090 | 4.082601022   | 0 | 1 | 0 | # | ho  |
| 2996 | 1 | 2 | 0.425000  | 2.046067415  | -10.720857339 | 8.349425190   | 0 | 1 | 0 | # | ho  |
| 2997 | 1 | 3 | -1.050000 | 1.974320767  | -10.401549350 | 4.908780749   | 0 | 1 | 0 | # | ob  |
| 2998 | 1 | 3 | -1.050000 | 1.589283948  | -10.393634011 | 2.23829865    | 0 | 1 | 0 | # | ob  |
| 2999 | 1 | 3 | -1.050000 | 4.162820410  | -10.386335530 | 6.457577115   | 0 | 1 | 0 | # | ob  |
| 3000 | 1 | 3 | -1.050000 | 2.219750450  | -12.638429459 | 3.535812584   | 0 | 1 | 0 | # | ob  |
| 3001 | 1 | 3 | -1.050000 | 4.804343942  | -12.637628090 | 7.754751701   | 0 | 1 | 0 | # | ob  |
| 3002 | 1 | 3 | -1.050000 | 0.606605783  | -8.275939116  | 0.680433991   | 0 | 1 | 0 | # | ob  |
| 3003 | 1 | 3 | -1.050000 | 3.188175495  | -8.277784485  | 4.902851743   | 0 | 1 | 0 | # | ob  |
| 3004 | 1 | 3 | -1.050000 | 2.355525134  | -6.044156828  | 3.727147445   | 0 | 1 | 0 | # | ob  |
| 3005 | 1 | 3 | -1.050000 | 4.928942666  | -6.040640091  | 7.955469793   | 0 | 1 | 0 | # | ob  |
| 3006 | 1 | 3 | -1.050000 | 0.358599510  | -6.041354729  | 2.056943562   | 0 | 1 | 0 | # | ob  |
| 3007 | 1 | 3 | -1.050000 | 2.943159518  | -6.041077613  | 6.275700930   | 0 | 1 | 0 | # | ob  |
| 3008 | 1 | 4 | -0.950000 | 0.973817447  | -8.354042618  | 6.456311812   | 0 | 1 | 0 | # | oh  |
| 3009 | 1 | 4 | -0.950000 | 3.559070440  | -8.366735269  | 2.229260000   | 0 | 1 | 0 | # | oh  |
| 3010 | 1 | 3 | -1.050000 | 2.368990946  | -6.317606791  | 0.417596118   | 0 | 1 | 0 | # | ob  |
| 3011 | 1 | 3 | -1.050000 | 4.963275993  | -6.333759730  | 4.648938892   | 0 | 1 | 0 | # | ob  |
| 3012 | 1 | 4 | -0.950000 | 1.603365723  | -10.312589933 | 7.582229270   | 0 | 1 | 0 | # | oh  |
| 3013 | 1 | 3 | -1.050000 | 0.199951485  | -12.345953389 | 5.162916698   | 0 | 1 | 0 | # | ob  |
| 3014 | 1 | 4 | -0.950000 | 4.188976468  | -10.324863219 | 3.355759607   | 0 | 1 | 0 | # | oh  |
| 3015 | 1 | 3 | -1.050000 | 2.793669734  | -12.361777046 | 0.944364434   | 0 | 1 | 0 | # | ob  |
| 3016 | 1 | 3 | -1.050000 | 0.999937272  | -8.292941387  | 3.353842278   | 0 | 1 | 0 | # | ob  |
| 3017 | 1 | 3 | -1.050000 | 3.573485134  | -8.285734762  | 7.587875661   | 0 | 1 | 0 | # | ob  |
| 3018 | 1 | 3 | -1.050000 | 4.555837623  | -10.403223292 | 0.681739972   | 0 | 1 | 0 | # | ob  |
| 3019 | 1 | 3 | -1.050000 | 0.233734585  | -12.638466293 | 1.856176368   | 0 | 1 | 0 | # | ob  |
| 3020 | 1 | 3 | -1.050000 | 2.807687271  | -12.635163569 | 6.084357725   | 0 | 1 | 0 | # | ob  |
| 3021 | 1 | 5 | 2.100000  | 0.877003477  | -6.663500962  | 3.452486522   | 0 | 1 | 0 | # | st  |

|      |   |   |           |             |               |               |   |   |   |   |     |
|------|---|---|-----------|-------------|---------------|---------------|---|---|---|---|-----|
| 3022 | 1 | 5 | 2.100000  | 3.449029217 | -6.654519659  | 7.680379551   | 0 | 1 | 0 | # | st  |
| 3023 | 1 | 5 | 2.100000  | 4.372376051 | -12.022163392 | 0.744074984   | 0 | 1 | 0 | # | st  |
| 3024 | 1 | 5 | 2.100000  | 1.713733961 | -12.024860033 | 2.131278354   | 0 | 1 | 0 | # | st  |
| 3025 | 1 | 5 | 2.100000  | 4.286150250 | -12.015782580 | 6.359024273   | 0 | 1 | 0 | # | st  |
| 3026 | 1 | 5 | 2.100000  | 0.790278839 | -6.657050089  | 0.617961151   | 0 | 1 | 0 | # | st  |
| 3027 | 1 | 5 | 2.100000  | 3.378672668 | -6.660702575  | 4.839744045   | 0 | 1 | 0 | # | st  |
| 3028 | 1 | 5 | 2.100000  | 1.784418745 | -12.018795815 | 4.971778212   | 0 | 1 | 0 | # | st  |
| 3029 | 1 | 1 | 1.575000  | 2.564951898 | -9.326242674  | 14.792747493  | 0 | 1 | 0 | # | ao  |
| 3030 | 1 | 1 | 1.575000  | 5.152091886 | -9.336267335  | 10.569647493  | 0 | 1 | 0 | # | ao  |
| 3031 | 1 | 1 | 1.575000  | 0.010475843 | -9.343085446  | 16.141210963  | 0 | 1 | 0 | # | ao  |
| 3032 | 1 | 1 | 1.575000  | 2.597479300 | -9.353073074  | 11.918102305  | 0 | 1 | 0 | # | ao  |
| 3033 | 1 | 2 | 0.425000  | 3.116355855 | -7.958936629  | 9.911451013   | 0 | 1 | 0 | # | ho  |
| 3034 | 1 | 2 | 0.425000  | 0.545922528 | -7.860595847  | 14.180912462  | 0 | 1 | 0 | # | ho  |
| 3035 | 1 | 2 | 0.425000  | 4.617664323 | -10.814890090 | 12.532201022  | 0 | 1 | 0 | # | ho  |
| 3036 | 1 | 2 | 0.425000  | 2.046067415 | -10.720857339 | 16.799025190  | 0 | 1 | 0 | # | ho  |
| 3037 | 1 | 3 | -1.050000 | 1.974320767 | -10.401549350 | 13.358380749  | 0 | 1 | 0 | # | ob  |
| 3038 | 1 | 3 | -1.050000 | 1.589283948 | -10.393634011 | 10.673429865  | 0 | 1 | 0 | # | ob  |
| 3039 | 1 | 3 | -1.050000 | 4.162820410 | -10.386335530 | 14.907177115  | 0 | 1 | 0 | # | ob  |
| 3040 | 1 | 3 | -1.050000 | 2.219750450 | -12.638429459 | 11.985412584  | 0 | 1 | 0 | # | ob  |
| 3041 | 1 | 6 | -0.950000 | 4.804343942 | -12.637628090 | -17.594048299 | 0 | 1 | 0 | # | oht |
| 3042 | 1 | 3 | -1.050000 | 0.606605783 | -8.275939116  | 9.130033991   | 0 | 1 | 0 | # | ob  |
| 3043 | 1 | 3 | -1.050000 | 3.188175495 | -8.277784485  | 13.352451743  | 0 | 1 | 0 | # | ob  |
| 3044 | 1 | 3 | -1.050000 | 2.355525134 | -6.044156828  | 12.176747445  | 0 | 1 | 0 | # | ob  |
| 3045 | 1 | 3 | -1.050000 | 4.928942666 | -6.040640091  | 16.405069793  | 0 | 1 | 0 | # | ob  |
| 3046 | 1 | 3 | -1.050000 | 0.358599510 | -6.041354729  | 10.506543562  | 0 | 1 | 0 | # | ob  |
| 3047 | 1 | 3 | -1.050000 | 2.943159518 | -6.041077613  | 14.725300930  | 0 | 1 | 0 | # | ob  |
| 3048 | 1 | 4 | -0.950000 | 0.973817447 | -8.354042618  | 14.905911812  | 0 | 1 | 0 | # | oh  |
| 3049 | 1 | 4 | -0.950000 | 3.559070440 | -8.366735269  | 10.678860000  | 0 | 1 | 0 | # | oh  |
| 3050 | 1 | 3 | -1.050000 | 2.368990946 | -6.317606791  | 8.867196118   | 0 | 1 | 0 | # | ob  |
| 3051 | 1 | 3 | -1.050000 | 4.963275993 | -6.333759730  | 13.098538892  | 0 | 1 | 0 | # | ob  |
| 3052 | 1 | 7 | -0.950000 | 1.603365723 | -10.312589933 | 16.031829270  | 0 | 1 | 0 | # | oho |
| 3053 | 1 | 3 | -1.050000 | 0.199951485 | -12.345953389 | 13.612516698  | 0 | 1 | 0 | # | ob  |
| 3054 | 1 | 4 | -0.950000 | 4.188976468 | -10.324863219 | 11.805359607  | 0 | 1 | 0 | # | oh  |
| 3055 | 1 | 3 | -1.050000 | 2.793669734 | -12.361777046 | 9.393964434   | 0 | 1 | 0 | # | ob  |
| 3056 | 1 | 3 | -1.050000 | 0.999937272 | -8.292941387  | 11.803442278  | 0 | 1 | 0 | # | ob  |
| 3057 | 1 | 3 | -1.050000 | 3.573485134 | -8.285734762  | 16.037475661  | 0 | 1 | 0 | # | ob  |
| 3058 | 1 | 3 | -1.050000 | 4.555837623 | -10.403223292 | 9.131339972   | 0 | 1 | 0 | # | ob  |
| 3059 | 1 | 3 | -1.050000 | 0.233734585 | -12.638466293 | 10.305776368  | 0 | 1 | 0 | # | ob  |
| 3060 | 1 | 3 | -1.050000 | 2.807687271 | -12.635163569 | 14.533957725  | 0 | 1 | 0 | # | ob  |
| 3061 | 1 | 5 | 2.100000  | 0.877003477 | -6.663500962  | 11.902086522  | 0 | 1 | 0 | # | st  |
| 3062 | 1 | 5 | 2.100000  | 3.449029217 | -6.654519659  | 16.129979551  | 0 | 1 | 0 | # | st  |
| 3063 | 1 | 5 | 2.100000  | 4.372376051 | -12.022163392 | 9.193674984   | 0 | 1 | 0 | # | st  |
| 3064 | 1 | 5 | 2.100000  | 1.713733961 | -12.024860033 | 10.580878354  | 0 | 1 | 0 | # | st  |
| 3065 | 1 | 5 | 2.100000  | 4.286150250 | -12.015782580 | 14.808624273  | 0 | 1 | 0 | # | st  |
| 3066 | 1 | 5 | 2.100000  | 0.790278839 | -6.657050089  | 9.067561151   | 0 | 1 | 0 | # | st  |
| 3067 | 1 | 5 | 2.100000  | 3.378672668 | -6.660702575  | 13.289344045  | 0 | 1 | 0 | # | st  |
| 3068 | 1 | 5 | 2.100000  | 1.784418745 | -12.018795815 | 13.421378212  | 0 | 1 | 0 | # | st  |
| 3069 | 1 | 1 | 1.575000  | 2.564951898 | -9.326242674  | -10.556052507 | 0 | 1 | 0 | # | ao  |
| 3070 | 1 | 1 | 1.575000  | 5.152091886 | -9.336267335  | -14.779152507 | 0 | 1 | 0 | # | ao  |
| 3071 | 1 | 1 | 1.575000  | 0.010475843 | -9.343085446  | -9.207589037  | 0 | 1 | 0 | # | ao  |
| 3072 | 1 | 1 | 1.575000  | 2.597479300 | -9.353073074  | -13.430697695 | 0 | 1 | 0 | # | ao  |
| 3073 | 1 | 2 | 0.425000  | 3.116355855 | -7.958936629  | -15.437348987 | 0 | 1 | 0 | # | ho  |
| 3074 | 1 | 2 | 0.425000  | 0.545922528 | -7.860595847  | -11.167887538 | 0 | 1 | 0 | # | ho  |
| 3075 | 1 | 2 | 0.425000  | 4.617664323 | -10.814890090 | -12.816598978 | 0 | 1 | 0 | # | ho  |
| 3076 | 1 | 2 | 0.425000  | 2.046067415 | -10.720857339 | -8.549774810  | 0 | 1 | 0 | # | ho  |
| 3077 | 1 | 3 | -1.050000 | 1.974320767 | -10.401549350 | -11.990419251 | 0 | 1 | 0 | # | ob  |
| 3078 | 1 | 3 | -1.050000 | 1.589283948 | -10.393634011 | -14.675370135 | 0 | 1 | 0 | # | ob  |
| 3079 | 1 | 3 | -1.050000 | 4.162820410 | -10.386335530 | -10.441622885 | 0 | 1 | 0 | # | ob  |
| 3080 | 1 | 3 | -1.050000 | 2.219750450 | -12.638429459 | -13.363387416 | 0 | 1 | 0 | # | ob  |
| 3081 | 1 | 3 | -1.050000 | 4.804343942 | -12.637628090 | -9.144448299  | 0 | 1 | 0 | # | ob  |
| 3082 | 1 | 3 | -1.050000 | 0.606605783 | -8.275939116  | 17.579633991  | 0 | 1 | 0 | # | ob  |
| 3083 | 1 | 3 | -1.050000 | 3.188175495 | -8.277784485  | -11.996348257 | 0 | 1 | 0 | # | ob  |
| 3084 | 1 | 3 | -1.050000 | 2.355525134 | -6.044156828  | -13.172052555 | 0 | 1 | 0 | # | ob  |
| 3085 | 1 | 3 | -1.050000 | 4.928942666 | -6.040640091  | -8.943730207  | 0 | 1 | 0 | # | ob  |
| 3086 | 1 | 6 | -0.950000 | 0.358599510 | -6.041354729  | 18.956143562  | 0 | 1 | 0 | # | oht |
| 3087 | 1 | 3 | -1.050000 | 2.943159518 | -6.041077613  | -10.623499070 | 0 | 1 | 0 | # | ob  |
| 3088 | 1 | 4 | -0.950000 | 0.973817447 | -8.354042618  | -10.442888188 | 0 | 1 | 0 | # | oh  |
| 3089 | 1 | 7 | -0.950000 | 3.559070440 | -8.366735269  | -14.669940000 | 0 | 1 | 0 | # | oho |
| 3090 | 1 | 3 | -1.050000 | 2.368990946 | -6.317606791  | 17.316796118  | 0 | 1 | 0 | # | ob  |
| 3091 | 1 | 3 | -1.050000 | 4.963275993 | -6.333759730  | -12.250261108 | 0 | 1 | 0 | # | ob  |
| 3092 | 1 | 4 | -0.950000 | 1.603365723 | -10.312589933 | -9.316970730  | 0 | 1 | 0 | # | oh  |
| 3093 | 1 | 3 | -1.050000 | 0.199951485 | -12.345953389 | -11.736283302 | 0 | 1 | 0 | # | ob  |
| 3094 | 1 | 4 | -0.950000 | 4.188976468 | -10.324863219 | -13.543440393 | 0 | 1 | 0 | # | oh  |
| 3095 | 1 | 3 | -1.050000 | 2.793669734 | -12.361777046 | -15.954835566 | 0 | 1 | 0 | # | ob  |
| 3096 | 1 | 3 | -1.050000 | 0.999937272 | -8.292941387  | -13.545357722 | 0 | 1 | 0 | # | ob  |
| 3097 | 1 | 3 | -1.050000 | 3.573485134 | -8.285734762  | -9.311324339  | 0 | 1 | 0 | # | ob  |
| 3098 | 1 | 3 | -1.050000 | 4.555837623 | -10.403223292 | -16.217460028 | 0 | 1 | 0 | # | ob  |
| 3099 | 1 | 3 | -1.050000 | 0.233734585 | -12.638466293 | -15.043023632 | 0 | 1 | 0 | # | ob  |
| 3100 | 1 | 3 | -1.050000 | 2.807687271 | -12.635163569 | -10.814842275 | 0 | 1 | 0 | # | ob  |
| 3101 | 1 | 5 | 2.100000  | 0.877003477 | -6.663500962  | -13.446713478 | 0 | 1 | 0 | # | st  |
| 3102 | 1 | 5 | 2.100000  | 3.449029217 | -6.654519659  | -9.218820449  | 0 | 1 | 0 | # | st  |
| 3103 | 1 | 5 | 2.100000  | 4.372376051 | -12.022163392 | -16.155125016 | 0 | 1 | 0 | # | st  |
| 3104 | 1 | 5 | 2.100000  | 1.713733961 | -12.024860033 | -14.767921646 | 0 | 1 | 0 | # | st  |
| 3105 | 1 | 5 | 2.100000  | 4.286150250 | -12.015782580 | -10.540175727 | 0 | 1 | 0 | # | st  |
| 3106 | 1 | 5 | 2.100000  | 0.790278839 | -6.657050089  | 17.517161151  | 0 | 1 | 0 | # | st  |
| 3107 | 1 | 5 | 2.100000  | 3.378672668 | -6.660702575  | -12.059455955 | 0 | 1 | 0 | # | st  |
| 3108 | 1 | 5 | 2.100000  | 1.784418745 | -12.018795815 | -11.927421788 | 0 | 1 | 0 | # | st  |
| 3109 | 1 | 1 | 1.575000  | 2.564951898 | -9.326242674  | -2.106452507  | 0 | 1 | 0 | # | ao  |
| 3110 | 1 | 1 | 1.575000  | 5.152091886 | -9.336267335  | -6.329552507  | 0 | 1 | 0 | # | ao  |
| 3111 | 1 | 1 | 1.575000  | 0.010475843 | -9.343085446  | -0.757989037  | 0 | 1 | 0 | # | ao  |
| 3112 | 1 | 1 | 1.575000  | 2.597479300 | -9.353073074  | -4.981097695  | 0 | 1 | 0 | # | ao  |
| 3113 | 1 | 2 | 0.425000  | 3.116355855 | -7.958936629  | -6.987748987  | 0 | 1 | 0 | # | ho  |
| 3114 | 1 | 2 | 0.425000  | 0.545922528 | -7.860595847  | -2.718287538  | 0 | 1 | 0 | # | ho  |

|      |   |   |           |              |               |               |   |   |   |   |     |
|------|---|---|-----------|--------------|---------------|---------------|---|---|---|---|-----|
| 3115 | 1 | 2 | 0.425000  | 4.617664323  | -10.814890090 | -4.366998978  | 0 | 1 | 0 | # | ho  |
| 3116 | 1 | 2 | 0.425000  | 2.046067415  | -10.720857339 | -0.100174810  | 0 | 1 | 0 | # | ho  |
| 3117 | 1 | 3 | -1.050000 | 1.974320767  | -10.401549350 | -3.540819251  | 0 | 1 | 0 | # | ob  |
| 3118 | 1 | 3 | -1.050000 | 1.589283948  | -10.393634011 | -6.225770135  | 0 | 1 | 0 | # | ob  |
| 3119 | 1 | 3 | -1.050000 | 4.162820410  | -10.386335530 | -1.992022885  | 0 | 1 | 0 | # | ob  |
| 3120 | 1 | 3 | -1.050000 | 2.219750450  | -12.638429459 | -4.913787416  | 0 | 1 | 0 | # | ob  |
| 3121 | 1 | 3 | -1.050000 | 4.804343942  | -12.637628090 | -0.694848299  | 0 | 1 | 0 | # | ob  |
| 3122 | 1 | 3 | -1.050000 | 0.606605783  | -8.275939116  | -7.769166009  | 0 | 1 | 0 | # | ob  |
| 3123 | 1 | 3 | -1.050000 | 3.188175495  | -8.277784485  | -3.546748257  | 0 | 1 | 0 | # | ob  |
| 3124 | 1 | 3 | -1.050000 | 2.355525134  | -6.044156828  | -4.722452555  | 0 | 1 | 0 | # | ob  |
| 3125 | 1 | 3 | -1.050000 | 4.928942666  | -6.040640091  | -0.494130207  | 0 | 1 | 0 | # | ob  |
| 3126 | 1 | 3 | -1.050000 | 0.358599510  | -6.041354729  | -6.392656438  | 0 | 1 | 0 | # | ob  |
| 3127 | 1 | 3 | -1.050000 | 2.943159518  | -6.041077613  | -2.173899070  | 0 | 1 | 0 | # | ob  |
| 3128 | 1 | 4 | -0.950000 | 0.973817447  | -8.354042618  | -1.993288188  | 0 | 1 | 0 | # | oh  |
| 3129 | 1 | 4 | -0.950000 | 3.559070440  | -8.366735269  | -6.220340000  | 0 | 1 | 0 | # | oh  |
| 3130 | 1 | 3 | -1.050000 | 2.368990946  | -6.317606791  | -8.032003882  | 0 | 1 | 0 | # | ob  |
| 3131 | 1 | 3 | -1.050000 | 4.963275993  | -6.333759730  | -3.800661108  | 0 | 1 | 0 | # | ob  |
| 3132 | 1 | 4 | -0.950000 | 1.603365723  | -10.312589933 | -0.867370730  | 0 | 1 | 0 | # | oh  |
| 3133 | 1 | 3 | -1.050000 | 0.199951485  | -12.345953389 | -3.286683302  | 0 | 1 | 0 | # | ob  |
| 3134 | 1 | 4 | -0.950000 | 4.188976468  | -10.324863219 | -5.093840393  | 0 | 1 | 0 | # | oh  |
| 3135 | 1 | 3 | -1.050000 | 2.793669734  | -12.361777046 | -7.505235566  | 0 | 1 | 0 | # | ob  |
| 3136 | 1 | 3 | -1.050000 | 0.999937272  | -8.292941387  | -5.095757722  | 0 | 1 | 0 | # | ob  |
| 3137 | 1 | 3 | -1.050000 | 3.573485134  | -8.285734762  | -0.861724339  | 0 | 1 | 0 | # | ob  |
| 3138 | 1 | 3 | -1.050000 | 4.555837623  | -10.403223292 | -7.767860028  | 0 | 1 | 0 | # | ob  |
| 3139 | 1 | 3 | -1.050000 | 0.233734585  | -12.638466293 | -6.593423632  | 0 | 1 | 0 | # | ob  |
| 3140 | 1 | 3 | -1.050000 | 2.807687271  | -12.635163569 | -2.365242275  | 0 | 1 | 0 | # | ob  |
| 3141 | 1 | 5 | 2.100000  | 0.877003477  | -6.663500962  | -4.997113478  | 0 | 1 | 0 | # | st  |
| 3142 | 1 | 5 | 2.100000  | 3.449029217  | -6.654519659  | -0.769220449  | 0 | 1 | 0 | # | st  |
| 3143 | 1 | 5 | 2.100000  | 4.372376051  | -12.022163392 | -7.705525016  | 0 | 1 | 0 | # | st  |
| 3144 | 1 | 5 | 2.100000  | 1.713733961  | -12.024860033 | -6.318321646  | 0 | 1 | 0 | # | st  |
| 3145 | 1 | 5 | 2.100000  | 4.286150250  | -12.015782580 | -2.090575727  | 0 | 1 | 0 | # | st  |
| 3146 | 1 | 5 | 2.100000  | 0.790278839  | -6.657050089  | -7.831638849  | 0 | 1 | 0 | # | st  |
| 3147 | 1 | 5 | 2.100000  | 3.378672668  | -6.660702575  | -3.609855955  | 0 | 1 | 0 | # | st  |
| 3148 | 1 | 5 | 2.100000  | 1.784418745  | -12.018795815 | -3.477821788  | 0 | 1 | 0 | # | st  |
| 3149 | 1 | 6 | -0.950000 | 4.846051183  | -12.018171151 | 16.634714390  | 0 | 1 | 0 | # | oht |
| 3150 | 1 | 6 | -0.950000 | 0.590206465  | -6.422615341  | -15.319631379 | 0 | 1 | 0 | # | oht |
| 3151 | 1 | 2 | 0.425000  | 0.429963167  | -6.305444923  | -16.411736324 | 0 | 1 | 0 | # | ho  |
| 3152 | 1 | 2 | 0.425000  | 5.010789943  | -12.368058974 | -18.650841835 | 0 | 1 | 0 | # | ho  |
| 3153 | 1 | 2 | 0.425000  | 0.435438959  | -6.134001635  | 20.059598264  | 0 | 1 | 0 | # | ho  |
| 3154 | 1 | 2 | 0.425000  | 4.457833436  | -11.917786233 | 17.669755394  | 0 | 1 | 0 | # | ho  |
| 3155 | 1 | 1 | 1.575000  | 7.727751898  | -9.326242674  | 6.343147493   | 0 | 1 | 0 | # | ao  |
| 3156 | 1 | 1 | 1.575000  | 10.314891886 | -9.336267335  | 2.120047493   | 0 | 1 | 0 | # | ao  |
| 3157 | 1 | 1 | 1.575000  | 5.173275843  | -9.343085446  | 7.691610963   | 0 | 1 | 0 | # | ao  |
| 3158 | 1 | 1 | 1.575000  | 7.760279300  | -9.353073074  | 3.468502305   | 0 | 1 | 0 | # | ao  |
| 3159 | 1 | 2 | 0.425000  | 8.279155855  | -7.958936629  | 1.461851013   | 0 | 1 | 0 | # | ho  |
| 3160 | 1 | 2 | 0.425000  | 5.708722528  | -7.860595847  | 5.731312462   | 0 | 1 | 0 | # | ho  |
| 3161 | 1 | 2 | 0.425000  | 9.780464323  | -10.814890090 | 4.082601022   | 0 | 1 | 0 | # | ho  |
| 3162 | 1 | 2 | 0.425000  | 7.208867415  | -10.720857339 | 8.349425190   | 0 | 1 | 0 | # | ho  |
| 3163 | 1 | 3 | -1.050000 | 7.137120767  | -10.401549350 | 4.908780749   | 0 | 1 | 0 | # | ob  |
| 3164 | 1 | 3 | -1.050000 | 6.752083948  | -10.393634011 | 2.223829865   | 0 | 1 | 0 | # | ob  |
| 3165 | 1 | 3 | -1.050000 | 9.325620410  | -10.386335530 | 6.457577115   | 0 | 1 | 0 | # | ob  |
| 3166 | 1 | 3 | -1.050000 | 7.382550450  | -12.638429459 | 3.535812584   | 0 | 1 | 0 | # | ob  |
| 3167 | 1 | 3 | -1.050000 | 9.967143942  | -12.637628090 | 7.754751701   | 0 | 1 | 0 | # | ob  |
| 3168 | 1 | 3 | -1.050000 | 5.769405783  | -8.275939116  | 0.680433991   | 0 | 1 | 0 | # | ob  |
| 3169 | 1 | 3 | -1.050000 | 8.350975495  | -8.277784485  | 4.902851743   | 0 | 1 | 0 | # | ob  |
| 3170 | 1 | 3 | -1.050000 | 7.518325134  | -6.044156828  | 3.727147445   | 0 | 1 | 0 | # | ob  |
| 3171 | 1 | 3 | -1.050000 | 10.091742666 | -6.040640091  | 7.955469793   | 0 | 1 | 0 | # | ob  |
| 3172 | 1 | 3 | -1.050000 | 5.521399510  | -6.041354729  | 2.056943562   | 0 | 1 | 0 | # | ob  |
| 3173 | 1 | 3 | -1.050000 | 8.105959518  | -6.041077613  | 6.275700930   | 0 | 1 | 0 | # | ob  |
| 3174 | 1 | 4 | -0.950000 | 6.136617447  | -8.354042618  | 6.456311812   | 0 | 1 | 0 | # | oh  |
| 3175 | 1 | 4 | -0.950000 | 8.721870440  | -8.366735269  | 2.229260000   | 0 | 1 | 0 | # | oh  |
| 3176 | 1 | 3 | -1.050000 | 7.531790946  | -6.317606791  | 0.417596118   | 0 | 1 | 0 | # | ob  |
| 3177 | 1 | 3 | -1.050000 | 10.126075993 | -6.333759730  | 4.648938892   | 0 | 1 | 0 | # | ob  |
| 3178 | 1 | 4 | -0.950000 | 6.766165723  | -10.312589933 | 7.582229270   | 0 | 1 | 0 | # | oh  |
| 3179 | 1 | 3 | -1.050000 | 5.362751485  | -12.345953389 | 5.162916698   | 0 | 1 | 0 | # | ob  |
| 3180 | 1 | 4 | -0.950000 | 9.351776468  | -10.324863219 | 3.355759607   | 0 | 1 | 0 | # | oh  |
| 3181 | 1 | 3 | -1.050000 | 7.956469734  | -12.361777046 | 0.944364434   | 0 | 1 | 0 | # | ob  |
| 3182 | 1 | 3 | -1.050000 | 6.162737272  | -8.292941387  | 3.353842278   | 0 | 1 | 0 | # | ob  |
| 3183 | 1 | 3 | -1.050000 | 8.736285134  | -8.285734762  | 7.587875661   | 0 | 1 | 0 | # | ob  |
| 3184 | 1 | 3 | -1.050000 | 9.718637623  | -10.403223292 | 0.681739972   | 0 | 1 | 0 | # | ob  |
| 3185 | 1 | 3 | -1.050000 | 5.396534585  | -12.638466293 | 1.856176368   | 0 | 1 | 0 | # | ob  |
| 3186 | 1 | 3 | -1.050000 | 7.970487271  | -12.635163569 | 6.084357725   | 0 | 1 | 0 | # | ob  |
| 3187 | 1 | 5 | 2.100000  | 6.039803477  | -6.663500962  | 3.452486522   | 0 | 1 | 0 | # | st  |
| 3188 | 1 | 5 | 2.100000  | 8.611829217  | -6.654519659  | 7.680379551   | 0 | 1 | 0 | # | st  |
| 3189 | 1 | 5 | 2.100000  | 9.535176051  | -12.022163392 | 0.744074984   | 0 | 1 | 0 | # | st  |
| 3190 | 1 | 5 | 2.100000  | 6.876533961  | -12.024860033 | 2.131278354   | 0 | 1 | 0 | # | st  |
| 3191 | 1 | 5 | 2.100000  | 9.448950250  | -12.015782580 | 6.359024273   | 0 | 1 | 0 | # | st  |
| 3192 | 1 | 5 | 2.100000  | 5.953078839  | -6.657050089  | 0.617961151   | 0 | 1 | 0 | # | st  |
| 3193 | 1 | 5 | 2.100000  | 8.541472668  | -6.660702575  | 4.839744045   | 0 | 1 | 0 | # | st  |
| 3194 | 1 | 5 | 2.100000  | 6.947218745  | -12.018795815 | 4.971778212   | 0 | 1 | 0 | # | st  |
| 3195 | 1 | 1 | 1.575000  | 7.727751898  | -9.326242674  | 14.792747493  | 0 | 1 | 0 | # | ao  |
| 3196 | 1 | 1 | 1.575000  | 10.314891886 | -9.336267335  | 10.569647493  | 0 | 1 | 0 | # | ao  |
| 3197 | 1 | 1 | 1.575000  | 5.173275843  | -9.343085446  | 16.141210963  | 0 | 1 | 0 | # | ao  |
| 3198 | 1 | 1 | 1.575000  | 7.760279300  | -9.353073074  | 11.918102305  | 0 | 1 | 0 | # | ao  |
| 3199 | 1 | 2 | 0.425000  | 8.279155855  | -7.958936629  | 9.911451013   | 0 | 1 | 0 | # | ho  |
| 3200 | 1 | 2 | 0.425000  | 5.708722528  | -7.860595847  | 14.180912462  | 0 | 1 | 0 | # | ho  |
| 3201 | 1 | 2 | 0.425000  | 9.780464323  | -10.814890090 | 12.532201022  | 0 | 1 | 0 | # | ho  |
| 3202 | 1 | 2 | 0.425000  | 7.208867415  | -10.720857339 | 16.799025190  | 0 | 1 | 0 | # | ho  |
| 3203 | 1 | 3 | -1.050000 | 7.137120767  | -10.401549350 | 13.358380749  | 0 | 1 | 0 | # | ob  |
| 3204 | 1 | 3 | -1.050000 | 6.752083948  | -10.393634011 | 10.673429865  | 0 | 1 | 0 | # | ob  |
| 3205 | 1 | 3 | -1.050000 | 9.325620410  | -10.386335530 | 14.907177115  | 0 | 1 | 0 | # | ob  |
| 3206 | 1 | 3 | -1.050000 | 7.382550450  | -12.638429459 | 11.985412584  | 0 | 1 | 0 | # | ob  |
| 3207 | 1 | 6 | -0.950000 | 9.967143942  | -12.637628090 | -17.594048299 | 0 | 1 | 0 | # | oht |

|      |   |   |           |              |               |               |   |   |   |   |     |
|------|---|---|-----------|--------------|---------------|---------------|---|---|---|---|-----|
| 3208 | 1 | 3 | -1.050000 | 5.769405783  | -8.275939116  | 9.130033991   | 0 | 1 | 0 | # | ob  |
| 3209 | 1 | 3 | -1.050000 | 8.350975495  | -8.277784485  | 13.352451743  | 0 | 1 | 0 | # | ob  |
| 3210 | 1 | 3 | -1.050000 | 7.518325134  | -6.044156828  | 12.176747445  | 0 | 1 | 0 | # | ob  |
| 3211 | 1 | 3 | -1.050000 | 10.091742666 | -6.040640091  | 16.405069793  | 0 | 1 | 0 | # | ob  |
| 3212 | 1 | 3 | -1.050000 | 5.521399510  | -6.041354729  | 10.506543562  | 0 | 1 | 0 | # | ob  |
| 3213 | 1 | 3 | -1.050000 | 8.105959518  | -6.041077613  | 14.725300930  | 0 | 1 | 0 | # | ob  |
| 3214 | 1 | 4 | -0.950000 | 6.136617447  | -8.354042618  | 14.905911812  | 0 | 1 | 0 | # | oh  |
| 3215 | 1 | 4 | -0.950000 | 8.721870440  | -8.366735269  | 10.678860000  | 0 | 1 | 0 | # | oh  |
| 3216 | 1 | 3 | -1.050000 | 7.531790946  | -6.317606791  | 8.867196118   | 0 | 1 | 0 | # | ob  |
| 3217 | 1 | 3 | -1.050000 | 10.126075993 | -6.333759730  | 13.098538892  | 0 | 1 | 0 | # | ob  |
| 3218 | 1 | 7 | -0.950000 | 6.766165723  | -10.312589933 | 16.031829270  | 0 | 1 | 0 | # | oho |
| 3219 | 1 | 3 | -1.050000 | 5.362751485  | -12.345953389 | 13.612516698  | 0 | 1 | 0 | # | ob  |
| 3220 | 1 | 4 | -0.950000 | 9.351776468  | -10.324863219 | 11.805359607  | 0 | 1 | 0 | # | oh  |
| 3221 | 1 | 3 | -1.050000 | 7.956469734  | -12.361777046 | 9.393964434   | 0 | 1 | 0 | # | ob  |
| 3222 | 1 | 3 | -1.050000 | 6.162737272  | -8.292941387  | 11.803442278  | 0 | 1 | 0 | # | ob  |
| 3223 | 1 | 3 | -1.050000 | 8.736285134  | -8.285734762  | 16.037475661  | 0 | 1 | 0 | # | ob  |
| 3224 | 1 | 3 | -1.050000 | 9.718637623  | -10.403223292 | 9.131339972   | 0 | 1 | 0 | # | ob  |
| 3225 | 1 | 3 | -1.050000 | 5.396534585  | -12.638466293 | 10.305776368  | 0 | 1 | 0 | # | ob  |
| 3226 | 1 | 3 | -1.050000 | 7.970487271  | -12.635163569 | 14.533957725  | 0 | 1 | 0 | # | ob  |
| 3227 | 1 | 5 | 2.100000  | 6.039803477  | -6.663500962  | 11.902086522  | 0 | 1 | 0 | # | st  |
| 3228 | 1 | 5 | 2.100000  | 8.611829217  | -6.654519659  | 16.129979551  | 0 | 1 | 0 | # | st  |
| 3229 | 1 | 5 | 2.100000  | 9.535176051  | -12.022163392 | 9.193674984   | 0 | 1 | 0 | # | st  |
| 3230 | 1 | 5 | 2.100000  | 6.876533961  | -12.024860033 | 10.580878354  | 0 | 1 | 0 | # | st  |
| 3231 | 1 | 5 | 2.100000  | 9.448950250  | -12.015782580 | 14.808624273  | 0 | 1 | 0 | # | st  |
| 3232 | 1 | 5 | 2.100000  | 5.953078839  | -6.657050089  | 9.067561151   | 0 | 1 | 0 | # | st  |
| 3233 | 1 | 5 | 2.100000  | 8.541472668  | -6.660702575  | 13.289344045  | 0 | 1 | 0 | # | st  |
| 3234 | 1 | 5 | 2.100000  | 6.947218745  | -12.018795815 | 13.421378212  | 0 | 1 | 0 | # | st  |
| 3235 | 1 | 1 | 1.575000  | 7.727751898  | -9.326242674  | -10.556052507 | 0 | 1 | 0 | # | ao  |
| 3236 | 1 | 1 | 1.575000  | 10.314891886 | -9.336267335  | -14.779152507 | 0 | 1 | 0 | # | ao  |
| 3237 | 1 | 1 | 1.575000  | 5.173275843  | -9.343085446  | -9.207589037  | 0 | 1 | 0 | # | ao  |
| 3238 | 1 | 1 | 1.575000  | 7.760279300  | -9.353073074  | -13.430697695 | 0 | 1 | 0 | # | ao  |
| 3239 | 1 | 2 | 0.425000  | 8.279155855  | -7.958936629  | -15.437348987 | 0 | 1 | 0 | # | ho  |
| 3240 | 1 | 2 | 0.425000  | 5.708722528  | -7.860595847  | -11.167887538 | 0 | 1 | 0 | # | ho  |
| 3241 | 1 | 2 | 0.425000  | 9.780464323  | -10.814890090 | -12.816598978 | 0 | 1 | 0 | # | ho  |
| 3242 | 1 | 2 | 0.425000  | 7.208867415  | -10.720857339 | -8.549774810  | 0 | 1 | 0 | # | ho  |
| 3243 | 1 | 3 | -1.050000 | 7.137120767  | -10.401549350 | -11.990419251 | 0 | 1 | 0 | # | ob  |
| 3244 | 1 | 3 | -1.050000 | 6.752083948  | -10.393634011 | -14.675370135 | 0 | 1 | 0 | # | ob  |
| 3245 | 1 | 3 | -1.050000 | 9.325620410  | -10.386335530 | -10.441622885 | 0 | 1 | 0 | # | ob  |
| 3246 | 1 | 3 | -1.050000 | 7.382550450  | -12.638429459 | -13.363387416 | 0 | 1 | 0 | # | ob  |
| 3247 | 1 | 3 | -1.050000 | 9.967143942  | -12.637628090 | -9.144448299  | 0 | 1 | 0 | # | ob  |
| 3248 | 1 | 3 | -1.050000 | 5.769405783  | -8.275939116  | 17.579633991  | 0 | 1 | 0 | # | ob  |
| 3249 | 1 | 3 | -1.050000 | 8.350975495  | -8.277784485  | -11.996348257 | 0 | 1 | 0 | # | ob  |
| 3250 | 1 | 3 | -1.050000 | 7.518325134  | -6.044156828  | -13.172052555 | 0 | 1 | 0 | # | ob  |
| 3251 | 1 | 3 | -1.050000 | 10.091742666 | -6.040640091  | -8.943730207  | 0 | 1 | 0 | # | ob  |
| 3252 | 1 | 6 | -0.950000 | 5.521399510  | -6.041354729  | 18.956143562  | 0 | 1 | 0 | # | oht |
| 3253 | 1 | 3 | -1.050000 | 8.105959518  | -6.041077613  | -10.623499070 | 0 | 1 | 0 | # | ob  |
| 3254 | 1 | 4 | -0.950000 | 6.136617447  | -8.354042618  | -10.442888188 | 0 | 1 | 0 | # | oh  |
| 3255 | 1 | 7 | -0.950000 | 8.721870440  | -8.366735269  | -14.669940000 | 0 | 1 | 0 | # | oho |
| 3256 | 1 | 3 | -1.050000 | 7.531790946  | -6.317606791  | 17.316796118  | 0 | 1 | 0 | # | ob  |
| 3257 | 1 | 3 | -1.050000 | 10.126075993 | -6.333759730  | -12.250261108 | 0 | 1 | 0 | # | ob  |
| 3258 | 1 | 4 | -0.950000 | 6.766165723  | -10.312589933 | -9.316970730  | 0 | 1 | 0 | # | oh  |
| 3259 | 1 | 3 | -1.050000 | 5.362751485  | -12.345953389 | -11.736283302 | 0 | 1 | 0 | # | ob  |
| 3260 | 1 | 4 | -0.950000 | 9.351776468  | -10.324863219 | -13.543440393 | 0 | 1 | 0 | # | oh  |
| 3261 | 1 | 3 | -1.050000 | 7.956469734  | -12.361777046 | -15.954835566 | 0 | 1 | 0 | # | ob  |
| 3262 | 1 | 3 | -1.050000 | 6.162737272  | -8.292941387  | -13.545357722 | 0 | 1 | 0 | # | ob  |
| 3263 | 1 | 3 | -1.050000 | 8.736285134  | -8.285734762  | -9.311324339  | 0 | 1 | 0 | # | ob  |
| 3264 | 1 | 3 | -1.050000 | 9.718637623  | -10.403223292 | -16.217460028 | 0 | 1 | 0 | # | ob  |
| 3265 | 1 | 3 | -1.050000 | 5.396534585  | -12.638466293 | -15.043023632 | 0 | 1 | 0 | # | ob  |
| 3266 | 1 | 3 | -1.050000 | 7.970487271  | -12.635163569 | -10.814842275 | 0 | 1 | 0 | # | ob  |
| 3267 | 1 | 5 | 2.100000  | 6.039803477  | -6.663500962  | -13.446713478 | 0 | 1 | 0 | # | st  |
| 3268 | 1 | 5 | 2.100000  | 8.611829217  | -6.654519659  | -9.218820449  | 0 | 1 | 0 | # | st  |
| 3269 | 1 | 5 | 2.100000  | 9.535176051  | -12.022163392 | -16.155125016 | 0 | 1 | 0 | # | st  |
| 3270 | 1 | 5 | 2.100000  | 6.876533961  | -12.024860033 | -14.767921646 | 0 | 1 | 0 | # | st  |
| 3271 | 1 | 5 | 2.100000  | 9.448950250  | -12.015782580 | -10.540175727 | 0 | 1 | 0 | # | st  |
| 3272 | 1 | 5 | 2.100000  | 5.953078839  | -6.657050089  | 17.517161151  | 0 | 1 | 0 | # | st  |
| 3273 | 1 | 5 | 2.100000  | 8.541472668  | -6.660702575  | -12.059455955 | 0 | 1 | 0 | # | st  |
| 3274 | 1 | 5 | 2.100000  | 6.947218745  | -12.018795815 | -11.927421788 | 0 | 1 | 0 | # | st  |
| 3275 | 1 | 1 | 1.575000  | 7.727751898  | -9.326242674  | -2.106452507  | 0 | 1 | 0 | # | ao  |
| 3276 | 1 | 1 | 1.575000  | 10.314891886 | -9.336267335  | -6.329525207  | 0 | 1 | 0 | # | ao  |
| 3277 | 1 | 1 | 1.575000  | 5.173275843  | -9.343085446  | -0.757989037  | 0 | 1 | 0 | # | ao  |
| 3278 | 1 | 1 | 1.575000  | 7.760279300  | -9.353073074  | -4.981097695  | 0 | 1 | 0 | # | ao  |
| 3279 | 1 | 2 | 0.425000  | 8.279155855  | -7.958936629  | -6.987748987  | 0 | 1 | 0 | # | ho  |
| 3280 | 1 | 2 | 0.425000  | 5.708722528  | -7.860595847  | -2.718287538  | 0 | 1 | 0 | # | ho  |
| 3281 | 1 | 2 | 0.425000  | 9.780464323  | -10.814890090 | -4.366998978  | 0 | 1 | 0 | # | ho  |
| 3282 | 1 | 2 | 0.425000  | 7.208867415  | -10.720857339 | -0.100174810  | 0 | 1 | 0 | # | ho  |
| 3283 | 1 | 3 | -1.050000 | 7.137120767  | -10.401549350 | -3.540819251  | 0 | 1 | 0 | # | ob  |
| 3284 | 1 | 3 | -1.050000 | 6.752083948  | -10.393634011 | -6.225770135  | 0 | 1 | 0 | # | ob  |
| 3285 | 1 | 3 | -1.050000 | 9.325620410  | -10.386335530 | -1.992022885  | 0 | 1 | 0 | # | ob  |
| 3286 | 1 | 3 | -1.050000 | 7.382550450  | -12.638429459 | -4.913787416  | 0 | 1 | 0 | # | ob  |
| 3287 | 1 | 3 | -1.050000 | 9.967143942  | -12.637628090 | -0.694848299  | 0 | 1 | 0 | # | ob  |
| 3288 | 1 | 3 | -1.050000 | 5.769405783  | -8.275939116  | -7.769166009  | 0 | 1 | 0 | # | ob  |
| 3289 | 1 | 3 | -1.050000 | 8.350975495  | -8.277784485  | -3.546748257  | 0 | 1 | 0 | # | ob  |
| 3290 | 1 | 3 | -1.050000 | 7.518325134  | -6.044156828  | -4.722452555  | 0 | 1 | 0 | # | ob  |
| 3291 | 1 | 3 | -1.050000 | 10.091742666 | -6.040640091  | -0.494130207  | 0 | 1 | 0 | # | ob  |
| 3292 | 1 | 3 | -1.050000 | 5.521399510  | -6.041354729  | -6.392656438  | 0 | 1 | 0 | # | ob  |
| 3293 | 1 | 3 | -1.050000 | 8.105959518  | -6.041077613  | -2.173899070  | 0 | 1 | 0 | # | ob  |
| 3294 | 1 | 4 | -0.950000 | 6.136617447  | -8.354042618  | -1.993288188  | 0 | 1 | 0 | # | oh  |
| 3295 | 1 | 4 | -0.950000 | 8.721870440  | -8.366735269  | -6.220340000  | 0 | 1 | 0 | # | oh  |
| 3296 | 1 | 3 | -1.050000 | 7.531790946  | -6.317606791  | -8.032003882  | 0 | 1 | 0 | # | ob  |
| 3297 | 1 | 3 | -1.050000 | 10.126075993 | -6.333759730  | -3.800661108  | 0 | 1 | 0 | # | ob  |
| 3298 | 1 | 4 | -0.950000 | 6.766165723  | -10.312589933 | -0.867370730  | 0 | 1 | 0 | # | oh  |
| 3299 | 1 | 3 | -1.050000 | 5.362751485  | -12.345953389 | -3.286683302  | 0 | 1 | 0 | # | ob  |
| 3300 | 1 | 4 | -0.950000 | 9.351776468  | -10.324863219 | -5.093840393  | 0 | 1 | 0 | # | oh  |

|      |   |   |           |              |               |               |   |   |   |   |     |
|------|---|---|-----------|--------------|---------------|---------------|---|---|---|---|-----|
| 3301 | 1 | 3 | -1.050000 | 7.956469734  | -12.361777046 | -7.505235566  | 0 | 1 | 0 | # | ob  |
| 3302 | 1 | 3 | -1.050000 | 6.162737272  | -8.292941387  | -5.095757722  | 0 | 1 | 0 | # | ob  |
| 3303 | 1 | 3 | -1.050000 | 8.736285134  | -8.285734762  | -0.861724339  | 0 | 1 | 0 | # | ob  |
| 3304 | 1 | 3 | -1.050000 | 9.718637623  | -10.403223292 | -7.767860028  | 0 | 1 | 0 | # | ob  |
| 3305 | 1 | 3 | -1.050000 | 5.396534585  | -12.638466293 | -6.593423632  | 0 | 1 | 0 | # | ob  |
| 3306 | 1 | 3 | -1.050000 | 7.970487271  | -12.635163569 | -2.365242275  | 0 | 1 | 0 | # | ob  |
| 3307 | 1 | 5 | 2.100000  | 6.039803477  | -6.663500962  | -4.997113478  | 0 | 1 | 0 | # | st  |
| 3308 | 1 | 5 | 2.100000  | 8.611829217  | -6.654519659  | -0.769220449  | 0 | 1 | 0 | # | st  |
| 3309 | 1 | 5 | 2.100000  | 9.535176051  | -12.022163392 | -7.705525016  | 0 | 1 | 0 | # | st  |
| 3310 | 1 | 5 | 2.100000  | 6.876533961  | -12.024860033 | -6.318321646  | 0 | 1 | 0 | # | st  |
| 3311 | 1 | 5 | 2.100000  | 9.448950250  | -12.015782580 | -2.090575727  | 0 | 1 | 0 | # | st  |
| 3312 | 1 | 5 | 2.100000  | 5.953078839  | -6.657050089  | -7.831638849  | 0 | 1 | 0 | # | st  |
| 3313 | 1 | 5 | 2.100000  | 8.541472668  | -6.660702575  | -3.609855955  | 0 | 1 | 0 | # | st  |
| 3314 | 1 | 5 | 2.100000  | 6.947218745  | -12.018795815 | -3.477821788  | 0 | 1 | 0 | # | st  |
| 3315 | 1 | 6 | -0.950000 | 10.008851183 | -12.018171151 | 16.634714390  | 0 | 1 | 0 | # | oht |
| 3316 | 1 | 6 | -0.950000 | 5.753006465  | -6.422615341  | -15.319631379 | 0 | 1 | 0 | # | oht |
| 3317 | 1 | 2 | 0.425000  | 5.592763167  | -6.305444923  | -16.411736324 | 0 | 1 | 0 | # | ho  |
| 3318 | 1 | 2 | 0.425000  | 10.173589943 | -12.368058974 | -18.650841835 | 0 | 1 | 0 | # | ho  |
| 3319 | 1 | 2 | 0.425000  | 5.598238959  | -6.134001635  | 20.059598264  | 0 | 1 | 0 | # | ho  |
| 3320 | 1 | 2 | 0.425000  | 9.620633436  | -11.917786233 | 17.669755394  | 0 | 1 | 0 | # | ho  |
| 3321 | 1 | 1 | 1.575000  | 12.890551898 | -9.326242674  | 6.343147493   | 0 | 1 | 0 | # | ao  |
| 3322 | 1 | 1 | 1.575000  | 15.477691886 | -9.336267335  | 2.120047493   | 0 | 1 | 0 | # | ao  |
| 3323 | 1 | 1 | 1.575000  | 10.336075843 | -9.343085446  | 7.691610963   | 0 | 1 | 0 | # | ao  |
| 3324 | 1 | 1 | 1.575000  | 12.923079300 | -9.353073074  | 3.468502305   | 0 | 1 | 0 | # | ao  |
| 3325 | 1 | 2 | 0.425000  | 13.441955855 | -7.958936629  | 1.461851013   | 0 | 1 | 0 | # | ho  |
| 3326 | 1 | 2 | 0.425000  | 10.871522528 | -7.860595847  | 5.731312462   | 0 | 1 | 0 | # | ho  |
| 3327 | 1 | 2 | 0.425000  | 14.943264323 | -10.814890090 | 4.082601022   | 0 | 1 | 0 | # | ho  |
| 3328 | 1 | 2 | 0.425000  | 12.371667415 | -10.720857339 | 8.349425190   | 0 | 1 | 0 | # | ho  |
| 3329 | 1 | 3 | -1.050000 | 12.299920767 | -10.401549350 | 4.908780749   | 0 | 1 | 0 | # | ob  |
| 3330 | 1 | 3 | -1.050000 | 11.914883948 | -10.393634011 | 2.223829865   | 0 | 1 | 0 | # | ob  |
| 3331 | 1 | 3 | -1.050000 | 14.88420410  | -10.386335530 | 6.457577115   | 0 | 1 | 0 | # | ob  |
| 3332 | 1 | 3 | -1.050000 | 12.545350450 | -12.638429459 | 3.535812584   | 0 | 1 | 0 | # | ob  |
| 3333 | 1 | 3 | -1.050000 | 15.129943942 | -12.637628090 | 7.754751701   | 0 | 1 | 0 | # | ob  |
| 3334 | 1 | 3 | -1.050000 | 10.932205783 | -8.275939116  | 0.680433991   | 0 | 1 | 0 | # | ob  |
| 3335 | 1 | 3 | -1.050000 | 13.513775495 | -8.277784485  | 4.902851743   | 0 | 1 | 0 | # | ob  |
| 3336 | 1 | 3 | -1.050000 | 12.681125134 | -6.044156828  | 3.727147445   | 0 | 1 | 0 | # | ob  |
| 3337 | 1 | 3 | -1.050000 | 15.254542666 | -6.040640091  | 7.955469793   | 0 | 1 | 0 | # | ob  |
| 3338 | 1 | 3 | -1.050000 | 10.684199510 | -6.041354729  | 2.056943562   | 0 | 1 | 0 | # | ob  |
| 3339 | 1 | 3 | -1.050000 | 13.268759518 | -6.041077613  | 6.275700930   | 0 | 1 | 0 | # | ob  |
| 3340 | 1 | 4 | -0.950000 | 11.299417447 | -8.354042618  | 6.456311812   | 0 | 1 | 0 | # | oh  |
| 3341 | 1 | 4 | -0.950000 | 13.884670440 | -8.366735269  | 2.229260000   | 0 | 1 | 0 | # | oh  |
| 3342 | 1 | 3 | -1.050000 | 12.694590946 | -6.317606791  | 0.417596118   | 0 | 1 | 0 | # | ob  |
| 3343 | 1 | 3 | -1.050000 | 15.288875993 | -6.333759730  | 4.648938892   | 0 | 1 | 0 | # | ob  |
| 3344 | 1 | 4 | -0.950000 | 11.928965723 | -10.312589933 | 7.582229270   | 0 | 1 | 0 | # | oh  |
| 3345 | 1 | 3 | -1.050000 | 10.525551485 | -12.345953389 | 5.162916698   | 0 | 1 | 0 | # | ob  |
| 3346 | 1 | 4 | -0.950000 | 14.514576468 | -10.324863219 | 3.355759607   | 0 | 1 | 0 | # | oh  |
| 3347 | 1 | 3 | -1.050000 | 13.119269734 | -12.361777046 | 0.944364434   | 0 | 1 | 0 | # | ob  |
| 3348 | 1 | 3 | -1.050000 | 11.325537272 | -8.292941387  | 3.353842278   | 0 | 1 | 0 | # | ob  |
| 3349 | 1 | 3 | -1.050000 | 13.899085134 | -8.285734762  | 7.587875661   | 0 | 1 | 0 | # | ob  |
| 3350 | 1 | 3 | -1.050000 | 14.881437623 | -10.403223292 | 0.681739972   | 0 | 1 | 0 | # | ob  |
| 3351 | 1 | 3 | -1.050000 | 10.559334585 | -12.638466293 | 1.856176368   | 0 | 1 | 0 | # | ob  |
| 3352 | 1 | 3 | -1.050000 | 13.133287271 | -12.635163569 | 6.084357725   | 0 | 1 | 0 | # | ob  |
| 3353 | 1 | 5 | 2.100000  | 11.202603477 | -6.663500962  | 3.452486522   | 0 | 1 | 0 | # | st  |
| 3354 | 1 | 5 | 2.100000  | 13.774629217 | -6.654519659  | 7.680379551   | 0 | 1 | 0 | # | st  |
| 3355 | 1 | 5 | 2.100000  | 14.697976051 | -12.022163392 | 0.744074984   | 0 | 1 | 0 | # | st  |
| 3356 | 1 | 5 | 2.100000  | 12.039333961 | -12.024860033 | 2.131278354   | 0 | 1 | 0 | # | st  |
| 3357 | 1 | 5 | 2.100000  | 14.611750250 | -12.015782580 | 6.359024273   | 0 | 1 | 0 | # | st  |
| 3358 | 1 | 5 | 2.100000  | 11.115878839 | -6.657050089  | 0.617961151   | 0 | 1 | 0 | # | st  |
| 3359 | 1 | 5 | 2.100000  | 13.704272668 | -6.660702575  | 4.839744045   | 0 | 1 | 0 | # | st  |
| 3360 | 1 | 5 | 2.100000  | 12.110018745 | -12.018795815 | 4.971778212   | 0 | 1 | 0 | # | st  |
| 3361 | 1 | 1 | 1.575000  | 12.890551898 | -9.326242674  | 14.792747493  | 0 | 1 | 0 | # | ao  |
| 3362 | 1 | 1 | 1.575000  | 15.477691886 | -9.336267335  | 10.569647493  | 0 | 1 | 0 | # | ao  |
| 3363 | 1 | 1 | 1.575000  | 10.336075843 | -9.343085446  | 16.141210963  | 0 | 1 | 0 | # | ao  |
| 3364 | 1 | 1 | 1.575000  | 12.923079300 | -9.353073074  | 11.918102305  | 0 | 1 | 0 | # | ao  |
| 3365 | 1 | 2 | 0.425000  | 13.441955855 | -7.958936629  | 9.911451013   | 0 | 1 | 0 | # | ho  |
| 3366 | 1 | 2 | 0.425000  | 10.871522528 | -7.860595847  | 14.180912462  | 0 | 1 | 0 | # | ho  |
| 3367 | 1 | 2 | 0.425000  | 14.943264323 | -10.814890090 | 12.532201022  | 0 | 1 | 0 | # | ho  |
| 3368 | 1 | 2 | 0.425000  | 12.371667415 | -10.720857339 | 16.799025190  | 0 | 1 | 0 | # | ho  |
| 3369 | 1 | 3 | -1.050000 | 12.299920767 | -10.401549350 | 13.358380749  | 0 | 1 | 0 | # | ob  |
| 3370 | 1 | 3 | -1.050000 | 11.914883948 | -10.393634011 | 10.673429865  | 0 | 1 | 0 | # | ob  |
| 3371 | 1 | 3 | -1.050000 | 14.88420410  | -10.386335530 | 14.907177115  | 0 | 1 | 0 | # | ob  |
| 3372 | 1 | 3 | -1.050000 | 12.545350450 | -12.638429459 | 11.985412584  | 0 | 1 | 0 | # | ob  |
| 3373 | 1 | 6 | -0.950000 | 15.129943942 | -12.637628090 | -17.594048299 | 0 | 1 | 0 | # | oht |
| 3374 | 1 | 3 | -1.050000 | 10.932205783 | -8.275939116  | 9.130033991   | 0 | 1 | 0 | # | ob  |
| 3375 | 1 | 3 | -1.050000 | 13.513775495 | -8.277784485  | 13.352451743  | 0 | 1 | 0 | # | ob  |
| 3376 | 1 | 3 | -1.050000 | 12.681125134 | -6.044156828  | 12.176747445  | 0 | 1 | 0 | # | ob  |
| 3377 | 1 | 3 | -1.050000 | 15.254542666 | -6.040640091  | 16.405069793  | 0 | 1 | 0 | # | ob  |
| 3378 | 1 | 3 | -1.050000 | 10.684199510 | -6.041354729  | 10.506543562  | 0 | 1 | 0 | # | ob  |
| 3379 | 1 | 3 | -1.050000 | 13.268759518 | -6.041077613  | 14.725300930  | 0 | 1 | 0 | # | ob  |
| 3380 | 1 | 4 | -0.950000 | 11.299417447 | -8.354042618  | 14.905911812  | 0 | 1 | 0 | # | oh  |
| 3381 | 1 | 4 | -0.950000 | 13.884670440 | -8.366735269  | 10.678860000  | 0 | 1 | 0 | # | oh  |
| 3382 | 1 | 3 | -1.050000 | 12.694590946 | -6.317606791  | 8.867196118   | 0 | 1 | 0 | # | ob  |
| 3383 | 1 | 3 | -1.050000 | 15.288875993 | -6.333759730  | 13.098538892  | 0 | 1 | 0 | # | ob  |
| 3384 | 1 | 7 | -0.950000 | 11.928965723 | -10.312589933 | 16.031829270  | 0 | 1 | 0 | # | oho |
| 3385 | 1 | 3 | -1.050000 | 10.525551485 | -12.345953389 | 13.612516698  | 0 | 1 | 0 | # | ob  |
| 3386 | 1 | 4 | -0.950000 | 14.514576468 | -10.324863219 | 11.805359607  | 0 | 1 | 0 | # | oh  |
| 3387 | 1 | 3 | -1.050000 | 13.119269734 | -12.361777046 | 9.393964434   | 0 | 1 | 0 | # | ob  |
| 3388 | 1 | 3 | -1.050000 | 11.325537272 | -8.292941387  | 11.803442278  | 0 | 1 | 0 | # | ob  |
| 3389 | 1 | 3 | -1.050000 | 13.899085134 | -8.285734762  | 16.037475661  | 0 | 1 | 0 | # | ob  |
| 3390 | 1 | 3 | -1.050000 | 14.881437623 | -10.403223292 | 9.131339972   | 0 | 1 | 0 | # | ob  |
| 3391 | 1 | 3 | -1.050000 | 10.559334585 | -12.638466293 | 10.305776368  | 0 | 1 | 0 | # | ob  |
| 3392 | 1 | 3 | -1.050000 | 13.133287271 | -12.635163569 | 14.533957725  | 0 | 1 | 0 | # | ob  |
| 3393 | 1 | 5 | 2.100000  | 11.202603477 | -6.663500962  | 11.902086522  | 0 | 1 | 0 | # | st  |



|      |   |   |           |              |               |               |   |   |   |   |     |
|------|---|---|-----------|--------------|---------------|---------------|---|---|---|---|-----|
| 3394 | 1 | 5 | 2.100000  | 13.774629217 | -6.654519659  | 16.129979551  | 0 | 1 | 0 | # | st  |
| 3395 | 1 | 5 | 2.100000  | 14.697976051 | -12.022163392 | 9.193674984   | 0 | 1 | 0 | # | st  |
| 3396 | 1 | 5 | 2.100000  | 12.039333961 | -12.024860033 | 10.580878354  | 0 | 1 | 0 | # | st  |
| 3397 | 1 | 5 | 2.100000  | 14.611750250 | -12.015782580 | 14.808624273  | 0 | 1 | 0 | # | st  |
| 3398 | 1 | 5 | 2.100000  | 11.115878839 | -6.657050089  | 9.067561151   | 0 | 1 | 0 | # | st  |
| 3399 | 1 | 5 | 2.100000  | 13.704272668 | -6.660702575  | 13.289344045  | 0 | 1 | 0 | # | st  |
| 3400 | 1 | 5 | 2.100000  | 12.110018745 | -12.018795815 | 13.421378212  | 0 | 1 | 0 | # | st  |
| 3401 | 1 | 1 | 1.575000  | 12.890551898 | -9.326242674  | -10.556052507 | 0 | 1 | 0 | # | ao  |
| 3402 | 1 | 1 | 1.575000  | 15.477691886 | -9.336267335  | -14.779152507 | 0 | 1 | 0 | # | ao  |
| 3403 | 1 | 1 | 1.575000  | 10.336075843 | -9.343085446  | -9.207589037  | 0 | 1 | 0 | # | ao  |
| 3404 | 1 | 1 | 1.575000  | 12.923079300 | -9.353073074  | -13.430697695 | 0 | 1 | 0 | # | ao  |
| 3405 | 1 | 2 | 0.425000  | 13.441955855 | -7.958936629  | -15.437348987 | 0 | 1 | 0 | # | ho  |
| 3406 | 1 | 2 | 0.425000  | 10.871522528 | -7.860595847  | -11.167887538 | 0 | 1 | 0 | # | ho  |
| 3407 | 1 | 2 | 0.425000  | 14.943264323 | -10.814890090 | -12.816598978 | 0 | 1 | 0 | # | ho  |
| 3408 | 1 | 2 | 0.425000  | 12.371667415 | -10.720857339 | -8.549774810  | 0 | 1 | 0 | # | ho  |
| 3409 | 1 | 3 | -1.050000 | 12.299920767 | -10.401549350 | -11.990419251 | 0 | 1 | 0 | # | ob  |
| 3410 | 1 | 3 | -1.050000 | 11.914883948 | -10.393634011 | -14.675370135 | 0 | 1 | 0 | # | ob  |
| 3411 | 1 | 3 | -1.050000 | 14.488420410 | -10.386335530 | -10.441622885 | 0 | 1 | 0 | # | ob  |
| 3412 | 1 | 3 | -1.050000 | 12.545350450 | -12.638429459 | -13.363387416 | 0 | 1 | 0 | # | ob  |
| 3413 | 1 | 3 | -1.050000 | 15.129943942 | -12.637628090 | -9.144448299  | 0 | 1 | 0 | # | ob  |
| 3414 | 1 | 3 | -1.050000 | 10.932205783 | -8.275939116  | 17.579633991  | 0 | 1 | 0 | # | ob  |
| 3415 | 1 | 3 | -1.050000 | 13.513775495 | -8.277784485  | -11.996348257 | 0 | 1 | 0 | # | ob  |
| 3416 | 1 | 3 | -1.050000 | 12.681125134 | -6.044156828  | -13.172052555 | 0 | 1 | 0 | # | ob  |
| 3417 | 1 | 3 | -1.050000 | 15.254542666 | -6.040640091  | -8.943730207  | 0 | 1 | 0 | # | ob  |
| 3418 | 1 | 6 | -0.950000 | 10.684199510 | -6.041354729  | 18.956143562  | 0 | 1 | 0 | # | oht |
| 3419 | 1 | 3 | -1.050000 | 13.268759518 | -6.041077613  | -10.623499070 | 0 | 1 | 0 | # | ob  |
| 3420 | 1 | 4 | -0.950000 | 11.299417447 | -8.354042618  | -10.442888188 | 0 | 1 | 0 | # | oh  |
| 3421 | 1 | 7 | -0.950000 | 13.884670440 | -8.366735269  | -14.669940000 | 0 | 1 | 0 | # | oho |
| 3422 | 1 | 3 | -1.050000 | 12.694590946 | -6.317606791  | 17.316796118  | 0 | 1 | 0 | # | ob  |
| 3423 | 1 | 3 | -1.050000 | 15.288875993 | -6.333759730  | -12.250261108 | 0 | 1 | 0 | # | ob  |
| 3424 | 1 | 4 | -0.950000 | 11.928965723 | -10.312589933 | -9.316970730  | 0 | 1 | 0 | # | oh  |
| 3425 | 1 | 3 | -1.050000 | 10.525551485 | -12.345953389 | -11.736283302 | 0 | 1 | 0 | # | ob  |
| 3426 | 1 | 4 | -0.950000 | 14.514576468 | -10.324863219 | -13.543440393 | 0 | 1 | 0 | # | oh  |
| 3427 | 1 | 3 | -1.050000 | 13.119269734 | -12.361777046 | -15.954835566 | 0 | 1 | 0 | # | ob  |
| 3428 | 1 | 3 | -1.050000 | 11.325537272 | -8.292941387  | -13.545357722 | 0 | 1 | 0 | # | ob  |
| 3429 | 1 | 3 | -1.050000 | 13.899085134 | -8.285734762  | -9.311324339  | 0 | 1 | 0 | # | ob  |
| 3430 | 1 | 3 | -1.050000 | 14.881437623 | -10.403223292 | -16.217460028 | 0 | 1 | 0 | # | ob  |
| 3431 | 1 | 3 | -1.050000 | 10.559334585 | -12.638466293 | -15.043023632 | 0 | 1 | 0 | # | ob  |
| 3432 | 1 | 3 | -1.050000 | 13.133287271 | -12.635163569 | -10.814842275 | 0 | 1 | 0 | # | ob  |
| 3433 | 1 | 5 | 2.100000  | 11.202603477 | -6.663500962  | -13.446713478 | 0 | 1 | 0 | # | st  |
| 3434 | 1 | 5 | 2.100000  | 13.774629217 | -6.654519659  | -9.218820449  | 0 | 1 | 0 | # | st  |
| 3435 | 1 | 5 | 2.100000  | 14.697976051 | -12.022163392 | -16.155125016 | 0 | 1 | 0 | # | st  |
| 3436 | 1 | 5 | 2.100000  | 12.039333961 | -12.024860033 | -14.767921646 | 0 | 1 | 0 | # | st  |
| 3437 | 1 | 5 | 2.100000  | 14.611750250 | -12.015782580 | -10.540175727 | 0 | 1 | 0 | # | st  |
| 3438 | 1 | 5 | 2.100000  | 11.115878839 | -6.657050089  | 17.517161151  | 0 | 1 | 0 | # | st  |
| 3439 | 1 | 5 | 2.100000  | 13.704272668 | -6.660702575  | -12.059455955 | 0 | 1 | 0 | # | st  |
| 3440 | 1 | 5 | 2.100000  | 12.110018745 | -12.018795815 | -11.927421788 | 0 | 1 | 0 | # | st  |
| 3441 | 1 | 1 | 1.575000  | 12.890551898 | -9.326242674  | -2.106452507  | 0 | 1 | 0 | # | ao  |
| 3442 | 1 | 1 | 1.575000  | 15.477691886 | -9.336267335  | -6.329552507  | 0 | 1 | 0 | # | ao  |
| 3443 | 1 | 1 | 1.575000  | 10.336075843 | -9.343085446  | -0.757989037  | 0 | 1 | 0 | # | ao  |
| 3444 | 1 | 1 | 1.575000  | 12.923079300 | -9.353073074  | -4.981097695  | 0 | 1 | 0 | # | ao  |
| 3445 | 1 | 2 | 0.425000  | 13.441955855 | -7.958936629  | -6.987748987  | 0 | 1 | 0 | # | ho  |
| 3446 | 1 | 2 | 0.425000  | 10.871522528 | -7.860595847  | -2.718287538  | 0 | 1 | 0 | # | ho  |
| 3447 | 1 | 2 | 0.425000  | 14.943264323 | -10.814890090 | -4.366998978  | 0 | 1 | 0 | # | ho  |
| 3448 | 1 | 2 | 0.425000  | 12.371667415 | -10.720857339 | -0.100174810  | 0 | 1 | 0 | # | ho  |
| 3449 | 1 | 3 | -1.050000 | 12.299920767 | -10.401549350 | -3.540819251  | 0 | 1 | 0 | # | ob  |
| 3450 | 1 | 3 | -1.050000 | 11.914883948 | -10.393634011 | -6.225770135  | 0 | 1 | 0 | # | ob  |
| 3451 | 1 | 3 | -1.050000 | 14.488420410 | -10.386335530 | -1.992022885  | 0 | 1 | 0 | # | ob  |
| 3452 | 1 | 3 | -1.050000 | 12.545350450 | -12.638429459 | -4.913787416  | 0 | 1 | 0 | # | ob  |
| 3453 | 1 | 3 | -1.050000 | 15.129943942 | -12.637628090 | -0.694848299  | 0 | 1 | 0 | # | ob  |
| 3454 | 1 | 3 | -1.050000 | 10.932205783 | -8.275939116  | -7.769166009  | 0 | 1 | 0 | # | ob  |
| 3455 | 1 | 3 | -1.050000 | 13.513775495 | -8.277784485  | -3.546748257  | 0 | 1 | 0 | # | ob  |
| 3456 | 1 | 3 | -1.050000 | 12.681125134 | -6.044156828  | -4.722452555  | 0 | 1 | 0 | # | ob  |
| 3457 | 1 | 3 | -1.050000 | 15.254542666 | -6.040640091  | -0.494130207  | 0 | 1 | 0 | # | ob  |
| 3458 | 1 | 3 | -1.050000 | 10.684199510 | -6.041354729  | -6.392656438  | 0 | 1 | 0 | # | ob  |
| 3459 | 1 | 3 | -1.050000 | 13.268759518 | -6.041077613  | -2.173899070  | 0 | 1 | 0 | # | ob  |
| 3460 | 1 | 4 | -0.950000 | 11.299417447 | -8.354042618  | -1.993288188  | 0 | 1 | 0 | # | oh  |
| 3461 | 1 | 4 | -0.950000 | 13.884670440 | -8.366735269  | -6.220340000  | 0 | 1 | 0 | # | oh  |
| 3462 | 1 | 3 | -1.050000 | 12.694590946 | -6.317606791  | -8.032003882  | 0 | 1 | 0 | # | ob  |
| 3463 | 1 | 3 | -1.050000 | 15.288875993 | -6.333759730  | -3.800661108  | 0 | 1 | 0 | # | ob  |
| 3464 | 1 | 4 | -0.950000 | 11.928965723 | -10.312589933 | -0.867370730  | 0 | 1 | 0 | # | oh  |
| 3465 | 1 | 3 | -1.050000 | 10.525551485 | -12.345953389 | -3.286683302  | 0 | 1 | 0 | # | ob  |
| 3466 | 1 | 4 | -0.950000 | 14.514576468 | -10.324863219 | -5.093840393  | 0 | 1 | 0 | # | oh  |
| 3467 | 1 | 3 | -1.050000 | 13.119269734 | -12.361777046 | -7.505235566  | 0 | 1 | 0 | # | ob  |
| 3468 | 1 | 3 | -1.050000 | 11.325537272 | -8.292941387  | -5.095757722  | 0 | 1 | 0 | # | ob  |
| 3469 | 1 | 3 | -1.050000 | 13.899085134 | -8.285734762  | -0.861724339  | 0 | 1 | 0 | # | ob  |
| 3470 | 1 | 3 | -1.050000 | 14.881437623 | -10.403223292 | -7.767860028  | 0 | 1 | 0 | # | ob  |
| 3471 | 1 | 3 | -1.050000 | 10.559334585 | -12.638466293 | -6.593423632  | 0 | 1 | 0 | # | ob  |
| 3472 | 1 | 3 | -1.050000 | 13.133287271 | -12.635163569 | -2.365242275  | 0 | 1 | 0 | # | ob  |
| 3473 | 1 | 5 | 2.100000  | 11.202603477 | -6.663500962  | -4.997113478  | 0 | 1 | 0 | # | st  |
| 3474 | 1 | 5 | 2.100000  | 13.774629217 | -6.654519659  | -0.769220449  | 0 | 1 | 0 | # | st  |
| 3475 | 1 | 5 | 2.100000  | 14.697976051 | -12.022163392 | -7.705525016  | 0 | 1 | 0 | # | st  |
| 3476 | 1 | 5 | 2.100000  | 12.039333961 | -12.024860033 | -6.318321646  | 0 | 1 | 0 | # | st  |
| 3477 | 1 | 5 | 2.100000  | 14.611750250 | -12.015782580 | -2.090575727  | 0 | 1 | 0 | # | st  |
| 3478 | 1 | 5 | 2.100000  | 11.115878839 | -6.657050089  | -7.831638849  | 0 | 1 | 0 | # | st  |
| 3479 | 1 | 5 | 2.100000  | 13.704272668 | -6.660702575  | -3.609855955  | 0 | 1 | 0 | # | st  |
| 3480 | 1 | 5 | 2.100000  | 12.110018745 | -12.018795815 | -3.477821788  | 0 | 1 | 0 | # | st  |
| 3481 | 1 | 6 | -0.950000 | 15.171651183 | -12.018171151 | 16.634714390  | 0 | 1 | 0 | # | oht |
| 3482 | 1 | 6 | -0.950000 | 10.915806465 | -6.422615341  | -15.319631379 | 0 | 1 | 0 | # | oht |
| 3483 | 1 | 2 | 0.425000  | 10.755563167 | -6.305444923  | -16.411736324 | 0 | 1 | 0 | # | ho  |
| 3484 | 1 | 2 | 0.425000  | 15.336389943 | -12.368058974 | -18.650841835 | 0 | 1 | 0 | # | ho  |
| 3485 | 1 | 2 | 0.425000  | 10.761038959 | -6.134001635  | 20.059598264  | 0 | 1 | 0 | # | ho  |
| 3486 | 1 | 2 | 0.425000  | 14.783433436 | -11.917786233 | 17.669755394  | 0 | 1 | 0 | # | ho  |

|      |   |   |           |               |               |               |   |   |   |   |     |
|------|---|---|-----------|---------------|---------------|---------------|---|---|---|---|-----|
| 3487 | 1 | 1 | 1.575000  | -12.923448102 | -9.326242674  | 6.343147493   | 1 | 1 | 0 | # | ao  |
| 3488 | 1 | 1 | 1.575000  | -10.336308114 | -9.336267335  | 2.120047493   | 1 | 1 | 0 | # | ao  |
| 3489 | 1 | 1 | 1.575000  | -15.477924157 | -9.343085446  | 7.691610963   | 1 | 1 | 0 | # | ao  |
| 3490 | 1 | 1 | 1.575000  | -12.890920700 | -9.353073074  | 3.468502305   | 1 | 1 | 0 | # | ao  |
| 3491 | 1 | 2 | 0.425000  | -12.372044145 | -7.958936629  | 1.461851013   | 1 | 1 | 0 | # | ho  |
| 3492 | 1 | 2 | 0.425000  | -14.942477472 | -7.860595847  | 5.731312462   | 1 | 1 | 0 | # | ho  |
| 3493 | 1 | 2 | 0.425000  | -10.870735677 | -10.814890090 | 4.082601022   | 1 | 1 | 0 | # | ho  |
| 3494 | 1 | 2 | 0.425000  | -13.442332585 | -10.720857339 | 8.349425190   | 1 | 1 | 0 | # | ho  |
| 3495 | 1 | 3 | -1.050000 | -13.514079233 | -10.401549350 | 4.908780749   | 1 | 1 | 0 | # | ob  |
| 3496 | 1 | 3 | -1.050000 | -13.899116052 | -10.393634011 | 2.223829865   | 1 | 1 | 0 | # | ob  |
| 3497 | 1 | 3 | -1.050000 | -11.325579590 | -10.386335530 | 6.457577115   | 1 | 1 | 0 | # | ob  |
| 3498 | 1 | 3 | -1.050000 | -13.268649550 | -12.638429459 | 3.535812584   | 1 | 1 | 0 | # | ob  |
| 3499 | 1 | 3 | -1.050000 | -10.684056058 | -12.637628090 | 7.754751701   | 1 | 1 | 0 | # | ob  |
| 3500 | 1 | 3 | -1.050000 | -14.881794217 | -8.275939116  | 0.680433991   | 1 | 1 | 0 | # | ob  |
| 3501 | 1 | 3 | -1.050000 | -12.300224505 | -8.277784485  | 4.902851743   | 1 | 1 | 0 | # | ob  |
| 3502 | 1 | 3 | -1.050000 | -13.132874866 | -6.044156828  | 3.727147445   | 1 | 1 | 0 | # | ob  |
| 3503 | 1 | 3 | -1.050000 | -10.559457334 | -6.040640091  | 7.955469793   | 1 | 1 | 0 | # | ob  |
| 3504 | 1 | 3 | -1.050000 | -15.129800490 | -6.041354729  | 2.056943562   | 1 | 1 | 0 | # | ob  |
| 3505 | 1 | 3 | -1.050000 | -12.545240482 | -6.041077613  | 6.275700930   | 1 | 1 | 0 | # | ob  |
| 3506 | 1 | 4 | -0.950000 | -14.514582553 | -8.354042618  | 6.456311812   | 1 | 1 | 0 | # | oh  |
| 3507 | 1 | 4 | -0.950000 | -11.929329560 | -8.366735269  | 2.229260000   | 1 | 1 | 0 | # | oh  |
| 3508 | 1 | 3 | -1.050000 | -13.119409054 | -6.317606791  | 0.417596118   | 1 | 1 | 0 | # | ob  |
| 3509 | 1 | 3 | -1.050000 | -10.525124007 | -6.333759730  | 4.648938892   | 1 | 1 | 0 | # | ob  |
| 3510 | 1 | 4 | -0.950000 | -13.885034277 | -10.312589933 | 7.582229270   | 1 | 1 | 0 | # | oh  |
| 3511 | 1 | 3 | -1.050000 | -15.288448515 | -12.345953389 | 5.162916698   | 1 | 1 | 0 | # | ob  |
| 3512 | 1 | 4 | -0.950000 | -11.299423532 | -10.324863219 | 3.355759607   | 1 | 1 | 0 | # | oh  |
| 3513 | 1 | 3 | -1.050000 | -12.694730266 | -12.361777046 | 0.944364434   | 1 | 1 | 0 | # | ob  |
| 3514 | 1 | 3 | -1.050000 | -14.488462728 | -8.292941387  | 3.353842278   | 1 | 1 | 0 | # | ob  |
| 3515 | 1 | 3 | -1.050000 | -11.914914866 | -8.285734762  | 7.587875661   | 1 | 1 | 0 | # | ob  |
| 3516 | 1 | 3 | -1.050000 | -10.932562377 | -10.403223292 | 0.681739972   | 1 | 1 | 0 | # | ob  |
| 3517 | 1 | 3 | -1.050000 | -15.254665415 | -12.638466293 | 1.856176368   | 1 | 1 | 0 | # | ob  |
| 3518 | 1 | 3 | -1.050000 | -12.680712729 | -12.635163569 | 6.084357725   | 1 | 1 | 0 | # | ob  |
| 3519 | 1 | 5 | 2.100000  | -14.611396523 | -6.663500962  | 3.452486522   | 1 | 1 | 0 | # | st  |
| 3520 | 1 | 5 | 2.100000  | -12.039370783 | -6.654519659  | 7.680379551   | 1 | 1 | 0 | # | st  |
| 3521 | 1 | 5 | 2.100000  | -11.116023949 | -12.022163392 | 0.744074984   | 1 | 1 | 0 | # | st  |
| 3522 | 1 | 5 | 2.100000  | -13.774666039 | -12.024860033 | 2.131278354   | 1 | 1 | 0 | # | st  |
| 3523 | 1 | 5 | 2.100000  | -11.202249750 | -12.015782580 | 6.359024273   | 1 | 1 | 0 | # | st  |
| 3524 | 1 | 5 | 2.100000  | -14.698121161 | -6.657050089  | 0.617961151   | 1 | 1 | 0 | # | st  |
| 3525 | 1 | 5 | 2.100000  | -12.109727332 | -6.660702575  | 4.839744045   | 1 | 1 | 0 | # | st  |
| 3526 | 1 | 5 | 2.100000  | -13.703981255 | -12.018795815 | 4.971778212   | 1 | 1 | 0 | # | st  |
| 3527 | 1 | 1 | 1.575000  | -12.923448102 | -9.326242674  | 14.792747493  | 1 | 1 | 0 | # | ao  |
| 3528 | 1 | 1 | 1.575000  | -10.336308114 | -9.336267335  | 10.569647493  | 1 | 1 | 0 | # | ao  |
| 3529 | 1 | 1 | 1.575000  | -15.477924157 | -9.343085446  | 16.141210963  | 1 | 1 | 0 | # | ao  |
| 3530 | 1 | 1 | 1.575000  | -12.890920700 | -9.353073074  | 11.918102305  | 1 | 1 | 0 | # | ao  |
| 3531 | 1 | 2 | 0.425000  | -12.372044145 | -7.958936629  | 9.911451013   | 1 | 1 | 0 | # | ho  |
| 3532 | 1 | 2 | 0.425000  | -14.942477472 | -7.860595847  | 14.180912462  | 1 | 1 | 0 | # | ho  |
| 3533 | 1 | 2 | 0.425000  | -10.870735677 | -10.814890090 | 12.532201022  | 1 | 1 | 0 | # | ho  |
| 3534 | 1 | 2 | 0.425000  | -13.442332585 | -10.720857339 | 16.799025190  | 1 | 1 | 0 | # | ho  |
| 3535 | 1 | 3 | -1.050000 | -13.514079233 | -10.401549350 | 13.358380749  | 1 | 1 | 0 | # | ob  |
| 3536 | 1 | 3 | -1.050000 | -13.899116052 | -10.393634011 | 10.673429865  | 1 | 1 | 0 | # | ob  |
| 3537 | 1 | 3 | -1.050000 | -11.325579590 | -10.386335530 | 14.907177115  | 1 | 1 | 0 | # | ob  |
| 3538 | 1 | 3 | -1.050000 | -13.268649550 | -12.638429459 | 11.985412584  | 1 | 1 | 0 | # | ob  |
| 3539 | 1 | 6 | -0.950000 | -10.684056058 | -12.637628090 | -17.594048299 | 1 | 1 | 0 | # | oht |
| 3540 | 1 | 3 | -1.050000 | -14.881794217 | -8.275939116  | 9.130033991   | 1 | 1 | 0 | # | ob  |
| 3541 | 1 | 3 | -1.050000 | -12.300224505 | -8.277784485  | 13.352451743  | 1 | 1 | 0 | # | ob  |
| 3542 | 1 | 3 | -1.050000 | -13.132874866 | -6.044156828  | 12.176747445  | 1 | 1 | 0 | # | ob  |
| 3543 | 1 | 3 | -1.050000 | -10.559457334 | -6.040640091  | 16.405069793  | 1 | 1 | 0 | # | ob  |
| 3544 | 1 | 3 | -1.050000 | -15.129800490 | -6.041354729  | 10.506543562  | 1 | 1 | 0 | # | ob  |
| 3545 | 1 | 3 | -1.050000 | -12.545240482 | -6.041077613  | 14.725300930  | 1 | 1 | 0 | # | ob  |
| 3546 | 1 | 4 | -0.950000 | -14.514582553 | -8.354042618  | 14.905911812  | 1 | 1 | 0 | # | oh  |
| 3547 | 1 | 4 | -0.950000 | -11.929329560 | -8.366735269  | 10.678860000  | 1 | 1 | 0 | # | oh  |
| 3548 | 1 | 3 | -1.050000 | -13.119409054 | -6.317606791  | 8.867196118   | 1 | 1 | 0 | # | ob  |
| 3549 | 1 | 3 | -1.050000 | -10.525124007 | -6.333759730  | 13.098538892  | 1 | 1 | 0 | # | ob  |
| 3550 | 1 | 7 | -0.950000 | -13.885034277 | -10.312589933 | 16.031829270  | 1 | 1 | 0 | # | oho |
| 3551 | 1 | 3 | -1.050000 | -15.288448515 | -12.345953389 | 13.612516698  | 1 | 1 | 0 | # | ob  |
| 3552 | 1 | 4 | -0.950000 | -11.299423532 | -10.324863219 | 11.805359607  | 1 | 1 | 0 | # | oh  |
| 3553 | 1 | 3 | -1.050000 | -12.694730266 | -12.361777046 | 9.939644434   | 1 | 1 | 0 | # | ob  |
| 3554 | 1 | 3 | -1.050000 | -14.488462728 | -8.292941387  | 11.803442278  | 1 | 1 | 0 | # | ob  |
| 3555 | 1 | 3 | -1.050000 | -11.914914866 | -8.285734762  | 16.037475661  | 1 | 1 | 0 | # | ob  |
| 3556 | 1 | 3 | -1.050000 | -10.932562377 | -10.403223292 | 9.131339972   | 1 | 1 | 0 | # | ob  |
| 3557 | 1 | 3 | -1.050000 | -15.254665415 | -12.638466293 | 10.305776368  | 1 | 1 | 0 | # | ob  |
| 3558 | 1 | 3 | -1.050000 | -12.680712729 | -12.635163569 | 14.533957725  | 1 | 1 | 0 | # | ob  |
| 3559 | 1 | 5 | 2.100000  | -14.611396523 | -6.663500962  | 11.902086522  | 1 | 1 | 0 | # | st  |
| 3560 | 1 | 5 | 2.100000  | -12.039370783 | -6.654519659  | 16.129979551  | 1 | 1 | 0 | # | st  |
| 3561 | 1 | 5 | 2.100000  | -11.116023949 | -12.022163392 | 9.193674984   | 1 | 1 | 0 | # | st  |
| 3562 | 1 | 5 | 2.100000  | -13.774666039 | -12.024860033 | 10.580878354  | 1 | 1 | 0 | # | st  |
| 3563 | 1 | 5 | 2.100000  | -11.202249750 | -12.015782580 | 14.808624273  | 1 | 1 | 0 | # | st  |
| 3564 | 1 | 5 | 2.100000  | -14.698121161 | -6.657050089  | 9.067561151   | 1 | 1 | 0 | # | st  |
| 3565 | 1 | 5 | 2.100000  | -12.109727332 | -6.660702575  | 13.289344045  | 1 | 1 | 0 | # | st  |
| 3566 | 1 | 5 | 2.100000  | -13.703981255 | -12.018795815 | 13.421378212  | 1 | 1 | 0 | # | st  |
| 3567 | 1 | 1 | 1.575000  | -12.923448102 | -9.326242674  | -10.556052507 | 1 | 1 | 0 | # | ao  |
| 3568 | 1 | 1 | 1.575000  | -10.336308114 | -9.336267335  | -14.779152507 | 1 | 1 | 0 | # | ao  |
| 3569 | 1 | 1 | 1.575000  | -15.477924157 | -9.343085446  | -9.207589037  | 1 | 1 | 0 | # | ao  |
| 3570 | 1 | 1 | 1.575000  | -12.890920700 | -9.353073074  | -13.430697695 | 1 | 1 | 0 | # | ao  |
| 3571 | 1 | 2 | 0.425000  | -12.372044145 | -7.958936629  | -15.437348987 | 1 | 1 | 0 | # | ho  |
| 3572 | 1 | 2 | 0.425000  | -14.942477472 | -7.860595847  | -11.167887538 | 1 | 1 | 0 | # | ho  |
| 3573 | 1 | 2 | 0.425000  | -10.870735677 | -10.814890090 | -12.816598978 | 1 | 1 | 0 | # | ho  |
| 3574 | 1 | 2 | 0.425000  | -13.442332585 | -10.720857339 | -8.549774810  | 1 | 1 | 0 | # | ho  |
| 3575 | 1 | 3 | -1.050000 | -13.514079233 | -10.401549350 | -11.990419251 | 1 | 1 | 0 | # | ob  |
| 3576 | 1 | 3 | -1.050000 | -13.899116052 | -10.393634011 | -14.675370135 | 1 | 1 | 0 | # | ob  |
| 3577 | 1 | 3 | -1.050000 | -11.325579590 | -10.386335530 | -10.441622885 | 1 | 1 | 0 | # | ob  |
| 3578 | 1 | 3 | -1.050000 | -13.268649550 | -12.638429459 | -13.363387416 | 1 | 1 | 0 | # | ob  |
| 3579 | 1 | 3 | -1.050000 | -10.684056058 | -12.637628090 | -9.144448299  | 1 | 1 | 0 | # | ob  |

|      |   |   |           |               |               |               |   |   |   |   |     |
|------|---|---|-----------|---------------|---------------|---------------|---|---|---|---|-----|
| 3580 | 1 | 3 | -1.050000 | -14.881794217 | -8.275939116  | 17.579633991  | 1 | 1 | 0 | # | ob  |
| 3581 | 1 | 3 | -1.050000 | -12.300224505 | -8.277784485  | -11.996348257 | 1 | 1 | 0 | # | ob  |
| 3582 | 1 | 3 | -1.050000 | -13.132874866 | -6.044156828  | -13.172052555 | 1 | 1 | 0 | # | ob  |
| 3583 | 1 | 3 | -1.050000 | -10.559457334 | -6.040640091  | -8.943730207  | 1 | 1 | 0 | # | ob  |
| 3584 | 1 | 6 | -0.950000 | -15.129800490 | -6.041354729  | 18.956143562  | 1 | 1 | 0 | # | oht |
| 3585 | 1 | 3 | -1.050000 | -12.545240482 | -6.041077613  | -10.623499070 | 1 | 1 | 0 | # | ob  |
| 3586 | 1 | 4 | -0.950000 | -14.514582553 | -8.354042618  | -10.442888188 | 1 | 1 | 0 | # | oh  |
| 3587 | 1 | 7 | -0.950000 | -11.929329560 | -8.366735269  | -14.669940000 | 1 | 1 | 0 | # | oho |
| 3588 | 1 | 3 | -1.050000 | -13.119409054 | -6.317606791  | 17.316796118  | 1 | 1 | 0 | # | ob  |
| 3589 | 1 | 3 | -1.050000 | -10.525124007 | -6.333759730  | -12.250261108 | 1 | 1 | 0 | # | ob  |
| 3590 | 1 | 4 | -0.950000 | -13.885034277 | -10.312589933 | -9.316970730  | 1 | 1 | 0 | # | oh  |
| 3591 | 1 | 3 | -1.050000 | -15.288448515 | -12.345953389 | -11.736283302 | 1 | 1 | 0 | # | ob  |
| 3592 | 1 | 4 | -0.950000 | -11.299423532 | -10.324863219 | -13.543440393 | 1 | 1 | 0 | # | oh  |
| 3593 | 1 | 3 | -1.050000 | -12.694730266 | -12.361777046 | -15.954835566 | 1 | 1 | 0 | # | ob  |
| 3594 | 1 | 3 | -1.050000 | -14.488462728 | -8.292941387  | -13.545357722 | 1 | 1 | 0 | # | ob  |
| 3595 | 1 | 3 | -1.050000 | -11.914914866 | -8.285734762  | -9.311324339  | 1 | 1 | 0 | # | ob  |
| 3596 | 1 | 3 | -1.050000 | -10.932562377 | -10.403223292 | -16.217460028 | 1 | 1 | 0 | # | ob  |
| 3597 | 1 | 3 | -1.050000 | -15.254665415 | -12.638466293 | -15.043023632 | 1 | 1 | 0 | # | ob  |
| 3598 | 1 | 3 | -1.050000 | -12.680712729 | -12.635163569 | -10.814842275 | 1 | 1 | 0 | # | ob  |
| 3599 | 1 | 5 | 2.100000  | -14.611396523 | -6.663500962  | -13.446713478 | 1 | 1 | 0 | # | st  |
| 3600 | 1 | 5 | 2.100000  | -12.039370783 | -6.654519659  | -9.218820449  | 1 | 1 | 0 | # | st  |
| 3601 | 1 | 5 | 2.100000  | -11.116023949 | -12.022163392 | -16.155125016 | 1 | 1 | 0 | # | st  |
| 3602 | 1 | 5 | 2.100000  | -13.774666039 | -12.024860033 | -14.767921646 | 1 | 1 | 0 | # | st  |
| 3603 | 1 | 5 | 2.100000  | -11.202249750 | -12.015782580 | -10.540175727 | 1 | 1 | 0 | # | st  |
| 3604 | 1 | 5 | 2.100000  | -14.698121161 | -6.657050089  | 17.517161151  | 1 | 1 | 0 | # | st  |
| 3605 | 1 | 5 | 2.100000  | -12.109727332 | -6.660702575  | -12.059455955 | 1 | 1 | 0 | # | st  |
| 3606 | 1 | 5 | 2.100000  | -13.703981255 | -12.018795815 | -11.927421788 | 1 | 1 | 0 | # | st  |
| 3607 | 1 | 1 | 1.575000  | -12.923448102 | -9.326242674  | -2.106452507  | 1 | 1 | 0 | # | ao  |
| 3608 | 1 | 1 | 1.575000  | -10.336308114 | -9.336267335  | -6.329552507  | 1 | 1 | 0 | # | ao  |
| 3609 | 1 | 1 | 1.575000  | -15.477924157 | -9.343085446  | -0.757989037  | 1 | 1 | 0 | # | ao  |
| 3610 | 1 | 1 | 1.575000  | -12.890920700 | -9.353073074  | -4.981097695  | 1 | 1 | 0 | # | ao  |
| 3611 | 1 | 2 | 0.425000  | -12.372044145 | -7.958936629  | -6.987748987  | 1 | 1 | 0 | # | ho  |
| 3612 | 1 | 2 | 0.425000  | -14.942477472 | -7.860595847  | -2.718287538  | 1 | 1 | 0 | # | ho  |
| 3613 | 1 | 2 | 0.425000  | -10.870735677 | -10.814890090 | -4.366998978  | 1 | 1 | 0 | # | ho  |
| 3614 | 1 | 2 | 0.425000  | -13.442332585 | -10.720857339 | -0.100174810  | 1 | 1 | 0 | # | ho  |
| 3615 | 1 | 3 | -1.050000 | -13.514079233 | -10.401549350 | -3.540819251  | 1 | 1 | 0 | # | ob  |
| 3616 | 1 | 3 | -1.050000 | -13.899116052 | -10.393634011 | -6.225770135  | 1 | 1 | 0 | # | ob  |
| 3617 | 1 | 3 | -1.050000 | -11.325579590 | -10.386335530 | -1.992022885  | 1 | 1 | 0 | # | ob  |
| 3618 | 1 | 3 | -1.050000 | -13.268649550 | -12.638429459 | -4.913787416  | 1 | 1 | 0 | # | ob  |
| 3619 | 1 | 3 | -1.050000 | -10.684056058 | -12.637628090 | -0.694848299  | 1 | 1 | 0 | # | ob  |
| 3620 | 1 | 3 | -1.050000 | -14.881794217 | -8.275939116  | -7.769166009  | 1 | 1 | 0 | # | ob  |
| 3621 | 1 | 3 | -1.050000 | -12.300224505 | -8.277784485  | -3.546748257  | 1 | 1 | 0 | # | ob  |
| 3622 | 1 | 3 | -1.050000 | -13.132874866 | -6.044156828  | -4.722452555  | 1 | 1 | 0 | # | ob  |
| 3623 | 1 | 3 | -1.050000 | -10.559457334 | -6.040640091  | -0.494130207  | 1 | 1 | 0 | # | ob  |
| 3624 | 1 | 3 | -1.050000 | -15.129800490 | -6.041354729  | -6.392656438  | 1 | 1 | 0 | # | ob  |
| 3625 | 1 | 3 | -1.050000 | -12.545240482 | -6.041077613  | -2.173899070  | 1 | 1 | 0 | # | ob  |
| 3626 | 1 | 4 | -0.950000 | -14.514582553 | -8.354042618  | -1.993288188  | 1 | 1 | 0 | # | oh  |
| 3627 | 1 | 4 | -0.950000 | -11.929329560 | -8.366735269  | -6.220340000  | 1 | 1 | 0 | # | oh  |
| 3628 | 1 | 3 | -1.050000 | -13.119409054 | -6.317606791  | -8.032003882  | 1 | 1 | 0 | # | ob  |
| 3629 | 1 | 3 | -1.050000 | -10.525124007 | -6.333759730  | -3.800661108  | 1 | 1 | 0 | # | ob  |
| 3630 | 1 | 4 | -0.950000 | -13.885034277 | -10.312589933 | -0.867370730  | 1 | 1 | 0 | # | oh  |
| 3631 | 1 | 3 | -1.050000 | -15.288448515 | -12.345953389 | -3.286683302  | 1 | 1 | 0 | # | ob  |
| 3632 | 1 | 4 | -0.950000 | -11.299423532 | -10.324863219 | -5.093840393  | 1 | 1 | 0 | # | oh  |
| 3633 | 1 | 3 | -1.050000 | -12.694730266 | -12.361777046 | -7.505235566  | 1 | 1 | 0 | # | ob  |
| 3634 | 1 | 3 | -1.050000 | -14.488462728 | -8.292941387  | -5.095757722  | 1 | 1 | 0 | # | ob  |
| 3635 | 1 | 3 | -1.050000 | -11.914914866 | -8.285734762  | -0.861724339  | 1 | 1 | 0 | # | ob  |
| 3636 | 1 | 3 | -1.050000 | -10.932562377 | -10.403223292 | -7.767860028  | 1 | 1 | 0 | # | ob  |
| 3637 | 1 | 3 | -1.050000 | -15.254665415 | -12.638466293 | -6.593423632  | 1 | 1 | 0 | # | ob  |
| 3638 | 1 | 3 | -1.050000 | -12.680712729 | -12.635163569 | -2.365242275  | 1 | 1 | 0 | # | ob  |
| 3639 | 1 | 5 | 2.100000  | -14.611396523 | -6.663500962  | -4.997113478  | 1 | 1 | 0 | # | st  |
| 3640 | 1 | 5 | 2.100000  | -12.039370783 | -6.654519659  | -0.769220449  | 1 | 1 | 0 | # | st  |
| 3641 | 1 | 5 | 2.100000  | -11.116023949 | -12.022163392 | -7.705525016  | 1 | 1 | 0 | # | st  |
| 3642 | 1 | 5 | 2.100000  | -13.774666039 | -12.024860033 | -6.318321646  | 1 | 1 | 0 | # | st  |
| 3643 | 1 | 5 | 2.100000  | -11.202249750 | -12.015782580 | -2.090575727  | 1 | 1 | 0 | # | st  |
| 3644 | 1 | 5 | 2.100000  | -14.698121161 | -6.657050089  | -7.831638849  | 1 | 1 | 0 | # | st  |
| 3645 | 1 | 5 | 2.100000  | -12.109727332 | -6.660702575  | -3.609855955  | 1 | 1 | 0 | # | st  |
| 3646 | 1 | 5 | 2.100000  | -13.703981255 | -12.018795815 | -3.477821788  | 1 | 1 | 0 | # | st  |
| 3647 | 1 | 6 | -0.950000 | -10.642348817 | -12.018171151 | 16.634714390  | 1 | 1 | 0 | # | oht |
| 3648 | 1 | 6 | -0.950000 | -14.898193535 | -6.422615341  | -15.319631379 | 1 | 1 | 0 | # | oht |
| 3649 | 1 | 2 | 0.425000  | -15.058436833 | -6.305444923  | -16.411736324 | 1 | 1 | 0 | # | ho  |
| 3650 | 1 | 2 | 0.425000  | -10.477610057 | -12.368058974 | -18.650841835 | 1 | 1 | 0 | # | ho  |
| 3651 | 1 | 2 | 0.425000  | -15.052961041 | -6.134001635  | 20.059598264  | 1 | 1 | 0 | # | ho  |
| 3652 | 1 | 2 | 0.425000  | -11.030566564 | -11.917786233 | 17.669755394  | 1 | 1 | 0 | # | ho  |
| 3653 | 1 | 1 | 1.575000  | -7.760648102  | -9.326242674  | 6.343147493   | 1 | 1 | 0 | # | ao  |
| 3654 | 1 | 1 | 1.575000  | -5.173508114  | -9.336267335  | 2.120047493   | 1 | 1 | 0 | # | ao  |
| 3655 | 1 | 1 | 1.575000  | -10.315124157 | -9.343085446  | 7.691610963   | 1 | 1 | 0 | # | ao  |
| 3656 | 1 | 1 | 1.575000  | -7.728120700  | -9.353073074  | 3.468502305   | 1 | 1 | 0 | # | ao  |
| 3657 | 1 | 2 | 0.425000  | -7.209244145  | -7.958936629  | 1.461851013   | 1 | 1 | 0 | # | ho  |
| 3658 | 1 | 2 | 0.425000  | -9.779677472  | -7.860595847  | 5.731312462   | 1 | 1 | 0 | # | ho  |
| 3659 | 1 | 2 | 0.425000  | -5.707935677  | -10.814890090 | 4.082601022   | 1 | 1 | 0 | # | ho  |
| 3660 | 1 | 2 | 0.425000  | -8.279532585  | -10.720857339 | 8.349425190   | 1 | 1 | 0 | # | ho  |
| 3661 | 1 | 3 | -1.050000 | -8.351279233  | -10.401549350 | 4.908780749   | 1 | 1 | 0 | # | ob  |
| 3662 | 1 | 3 | -1.050000 | -8.736316052  | -10.393634011 | 2.223829865   | 1 | 1 | 0 | # | ob  |
| 3663 | 1 | 3 | -1.050000 | -6.162779590  | -10.386335530 | 6.457577115   | 1 | 1 | 0 | # | ob  |
| 3664 | 1 | 3 | -1.050000 | -8.105849550  | -12.638429459 | 3.535812584   | 1 | 1 | 0 | # | ob  |
| 3665 | 1 | 3 | -1.050000 | -5.521265058  | -12.637628090 | 7.754751701   | 1 | 1 | 0 | # | ob  |
| 3666 | 1 | 3 | -1.050000 | -9.718994217  | -8.275939116  | 0.680433991   | 1 | 1 | 0 | # | ob  |
| 3667 | 1 | 3 | -1.050000 | -7.137424505  | -8.277784485  | 4.902851743   | 1 | 1 | 0 | # | ob  |
| 3668 | 1 | 3 | -1.050000 | -7.970074866  | -6.044156828  | 3.727147445   | 1 | 1 | 0 | # | ob  |
| 3669 | 1 | 3 | -1.050000 | -5.396657334  | -6.040640091  | 7.955469793   | 1 | 1 | 0 | # | ob  |
| 3670 | 1 | 3 | -1.050000 | -9.967000490  | -6.041354729  | 2.056943562   | 1 | 1 | 0 | # | ob  |
| 3671 | 1 | 3 | -1.050000 | -7.382440482  | -6.041077613  | 6.275700930   | 1 | 1 | 0 | # | ob  |
| 3672 | 1 | 4 | -0.950000 | -9.351782553  | -8.354042618  | 6.456311812   | 1 | 1 | 0 | # | oh  |

|      |   |   |           |               |               |               |   |   |   |   |     |
|------|---|---|-----------|---------------|---------------|---------------|---|---|---|---|-----|
| 3673 | 1 | 4 | -0.950000 | -6.766529560  | -8.366735269  | 2.229260000   | 1 | 1 | 0 | # | oh  |
| 3674 | 1 | 3 | -1.050000 | -7.956609054  | -6.317606791  | 0.417596118   | 1 | 1 | 0 | # | ob  |
| 3675 | 1 | 3 | -1.050000 | -5.362324007  | -6.333759730  | 4.648938892   | 1 | 1 | 0 | # | ob  |
| 3676 | 1 | 4 | -0.950000 | -8.722234277  | -10.312589933 | 7.582229270   | 1 | 1 | 0 | # | oh  |
| 3677 | 1 | 3 | -1.050000 | -10.125648515 | -12.345953389 | 5.162916698   | 1 | 1 | 0 | # | ob  |
| 3678 | 1 | 4 | -0.950000 | -6.136623532  | -10.324863219 | 3.355759607   | 1 | 1 | 0 | # | oh  |
| 3679 | 1 | 3 | -1.050000 | -7.531930266  | -12.361777046 | 0.944364434   | 1 | 1 | 0 | # | ob  |
| 3680 | 1 | 3 | -1.050000 | -9.325662728  | -8.292941387  | 3.353842278   | 1 | 1 | 0 | # | ob  |
| 3681 | 1 | 3 | -1.050000 | -6.752114866  | -8.285734762  | 7.587875661   | 1 | 1 | 0 | # | ob  |
| 3682 | 1 | 3 | -1.050000 | -5.769762377  | -10.403223292 | 0.681739972   | 1 | 1 | 0 | # | ob  |
| 3683 | 1 | 3 | -1.050000 | -10.091865415 | -12.638466293 | 1.856176368   | 1 | 1 | 0 | # | ob  |
| 3684 | 1 | 3 | -1.050000 | -7.517912729  | -12.635163569 | 6.084357725   | 1 | 1 | 0 | # | ob  |
| 3685 | 1 | 5 | 2.100000  | -9.448596523  | -6.663500962  | 3.452486522   | 1 | 1 | 0 | # | st  |
| 3686 | 1 | 5 | 2.100000  | -6.876570783  | -6.654519659  | 7.680379551   | 1 | 1 | 0 | # | st  |
| 3687 | 1 | 5 | 2.100000  | -5.953223949  | -12.022163392 | 0.744074984   | 1 | 1 | 0 | # | st  |
| 3688 | 1 | 5 | 2.100000  | -8.611866039  | -12.024860033 | 2.131278354   | 1 | 1 | 0 | # | st  |
| 3689 | 1 | 5 | 2.100000  | -6.039449750  | -12.015782580 | 6.359024273   | 1 | 1 | 0 | # | st  |
| 3690 | 1 | 5 | 2.100000  | -9.535231161  | -6.657050089  | 0.617961151   | 1 | 1 | 0 | # | st  |
| 3691 | 1 | 5 | 2.100000  | -6.946927332  | -6.660702575  | 4.839744045   | 1 | 1 | 0 | # | st  |
| 3692 | 1 | 5 | 2.100000  | -8.541181255  | -12.018795815 | 4.971778212   | 1 | 1 | 0 | # | st  |
| 3693 | 1 | 1 | 1.575000  | -7.760648102  | -9.326242674  | 14.792747493  | 1 | 1 | 0 | # | ao  |
| 3694 | 1 | 1 | 1.575000  | -5.173508114  | -9.336267335  | 10.569647493  | 1 | 1 | 0 | # | ao  |
| 3695 | 1 | 1 | 1.575000  | -10.315124157 | -9.343085446  | 16.141210963  | 1 | 1 | 0 | # | ao  |
| 3696 | 1 | 1 | 1.575000  | -7.728120700  | -9.353073074  | 11.918102305  | 1 | 1 | 0 | # | ao  |
| 3697 | 1 | 2 | 0.425000  | -7.209244145  | -7.958936629  | 9.911451013   | 1 | 1 | 0 | # | ho  |
| 3698 | 1 | 2 | 0.425000  | -9.779677472  | -7.860595847  | 14.180912462  | 1 | 1 | 0 | # | ho  |
| 3699 | 1 | 2 | 0.425000  | -5.707935677  | -10.814890090 | 12.532201022  | 1 | 1 | 0 | # | ho  |
| 3700 | 1 | 2 | 0.425000  | -8.279532585  | -10.720857339 | 16.799025190  | 1 | 1 | 0 | # | ho  |
| 3701 | 1 | 3 | -1.050000 | -8.351279233  | -10.401549350 | 13.358380749  | 1 | 1 | 0 | # | ob  |
| 3702 | 1 | 3 | -1.050000 | -8.736316052  | -10.393634011 | 10.673429865  | 1 | 1 | 0 | # | ob  |
| 3703 | 1 | 3 | -1.050000 | -6.162779590  | -10.386335530 | 14.907177115  | 1 | 1 | 0 | # | ob  |
| 3704 | 1 | 3 | -1.050000 | -8.105849550  | -12.638429459 | 11.985412584  | 1 | 1 | 0 | # | ob  |
| 3705 | 1 | 6 | -0.950000 | -5.521256058  | -12.637628090 | -17.594048299 | 1 | 1 | 0 | # | oht |
| 3706 | 1 | 3 | -1.050000 | -9.718994217  | -8.275939116  | 9.130033991   | 1 | 1 | 0 | # | ob  |
| 3707 | 1 | 3 | -1.050000 | -7.137424505  | -8.277784485  | 13.352451743  | 1 | 1 | 0 | # | ob  |
| 3708 | 1 | 3 | -1.050000 | -7.970074866  | -6.044156828  | 12.176747445  | 1 | 1 | 0 | # | ob  |
| 3709 | 1 | 3 | -1.050000 | -5.396657334  | -6.040640091  | 16.405069793  | 1 | 1 | 0 | # | ob  |
| 3710 | 1 | 3 | -1.050000 | -9.967000490  | -6.041354729  | 10.506543562  | 1 | 1 | 0 | # | ob  |
| 3711 | 1 | 3 | -1.050000 | -7.382440482  | -6.041077613  | 14.725300930  | 1 | 1 | 0 | # | ob  |
| 3712 | 1 | 4 | -0.950000 | -9.351782553  | -8.354042618  | 14.905911812  | 1 | 1 | 0 | # | ob  |
| 3713 | 1 | 4 | -0.950000 | -6.766529560  | -8.366735269  | 10.678860000  | 1 | 1 | 0 | # | oh  |
| 3714 | 1 | 3 | -1.050000 | -7.956609054  | -6.317606791  | 8.867196118   | 1 | 1 | 0 | # | ob  |
| 3715 | 1 | 3 | -1.050000 | -5.362324007  | -6.333759730  | 13.098538892  | 1 | 1 | 0 | # | ob  |
| 3716 | 1 | 7 | -0.950000 | -8.722234277  | -10.312589933 | 16.031829270  | 1 | 1 | 0 | # | oho |
| 3717 | 1 | 3 | -1.050000 | -10.125648515 | -12.345953389 | 13.612516698  | 1 | 1 | 0 | # | ob  |
| 3718 | 1 | 4 | -0.950000 | -6.136623532  | -10.324863219 | 11.805359607  | 1 | 1 | 0 | # | oh  |
| 3719 | 1 | 3 | -1.050000 | -7.531930266  | -12.361777046 | 9.393964434   | 1 | 1 | 0 | # | ob  |
| 3720 | 1 | 3 | -1.050000 | -9.325662728  | -8.292941387  | 11.803442278  | 1 | 1 | 0 | # | ob  |
| 3721 | 1 | 3 | -1.050000 | -6.752114866  | -8.285734762  | 16.037475661  | 1 | 1 | 0 | # | ob  |
| 3722 | 1 | 3 | -1.050000 | -5.769762377  | -10.403223292 | 9.131339972   | 1 | 1 | 0 | # | ob  |
| 3723 | 1 | 3 | -1.050000 | -10.091865415 | -12.638466293 | 10.305776368  | 1 | 1 | 0 | # | ob  |
| 3724 | 1 | 3 | -1.050000 | -7.517912729  | -12.635163569 | 14.533957725  | 1 | 1 | 0 | # | ob  |
| 3725 | 1 | 5 | 2.100000  | -9.448596523  | -6.663500962  | 11.902086522  | 1 | 1 | 0 | # | st  |
| 3726 | 1 | 5 | 2.100000  | -6.876570783  | -6.654519659  | 16.129979551  | 1 | 1 | 0 | # | st  |
| 3727 | 1 | 5 | 2.100000  | -5.953223949  | -12.022163392 | 9.193674984   | 1 | 1 | 0 | # | st  |
| 3728 | 1 | 5 | 2.100000  | -8.611866039  | -12.024860033 | 10.580878354  | 1 | 1 | 0 | # | st  |
| 3729 | 1 | 5 | 2.100000  | -6.039449750  | -12.015782580 | 14.808624273  | 1 | 1 | 0 | # | st  |
| 3730 | 1 | 5 | 2.100000  | -9.535231161  | -6.657050089  | 9.067561151   | 1 | 1 | 0 | # | st  |
| 3731 | 1 | 5 | 2.100000  | -6.946927332  | -6.660702575  | 13.289344045  | 1 | 1 | 0 | # | st  |
| 3732 | 1 | 5 | 2.100000  | -8.541181255  | -12.018795815 | 13.421378212  | 1 | 1 | 0 | # | st  |
| 3733 | 1 | 1 | 1.575000  | -7.760648102  | -9.326242674  | -10.556052507 | 1 | 1 | 0 | # | ao  |
| 3734 | 1 | 1 | 1.575000  | -5.173508114  | -9.336267335  | -14.779152507 | 1 | 1 | 0 | # | ao  |
| 3735 | 1 | 1 | 1.575000  | -10.315124157 | -9.343085446  | -9.207589037  | 1 | 1 | 0 | # | ao  |
| 3736 | 1 | 1 | 1.575000  | -7.728120700  | -9.353073074  | -13.430697695 | 1 | 1 | 0 | # | ao  |
| 3737 | 1 | 2 | 0.425000  | -7.209244145  | -7.958936629  | -15.437348987 | 1 | 1 | 0 | # | ho  |
| 3738 | 1 | 2 | 0.425000  | -9.779677472  | -7.860595847  | -11.167887538 | 1 | 1 | 0 | # | ho  |
| 3739 | 1 | 2 | 0.425000  | -5.707935677  | -10.814890090 | -12.816598978 | 1 | 1 | 0 | # | ho  |
| 3740 | 1 | 2 | 0.425000  | -8.279532585  | -10.720857339 | -8.549774810  | 1 | 1 | 0 | # | ho  |
| 3741 | 1 | 3 | -1.050000 | -8.351279233  | -10.401549350 | -11.990419251 | 1 | 1 | 0 | # | ob  |
| 3742 | 1 | 3 | -1.050000 | -8.736316052  | -10.393634011 | -14.675370135 | 1 | 1 | 0 | # | ob  |
| 3743 | 1 | 3 | -1.050000 | -6.162779590  | -10.386335530 | -10.441622885 | 1 | 1 | 0 | # | ob  |
| 3744 | 1 | 3 | -1.050000 | -8.105849550  | -12.638429459 | -13.363387416 | 1 | 1 | 0 | # | ob  |
| 3745 | 1 | 3 | -1.050000 | -5.521256058  | -12.637628090 | -9.144448299  | 1 | 1 | 0 | # | ob  |
| 3746 | 1 | 3 | -1.050000 | -9.718994217  | -8.275939116  | 17.579633991  | 1 | 1 | 0 | # | ob  |
| 3747 | 1 | 3 | -1.050000 | -7.137424505  | -8.277784485  | -11.996348257 | 1 | 1 | 0 | # | ob  |
| 3748 | 1 | 3 | -1.050000 | -7.970074866  | -6.044156828  | -13.172052555 | 1 | 1 | 0 | # | ob  |
| 3749 | 1 | 3 | -1.050000 | -5.396657334  | -6.040640091  | -8.943730207  | 1 | 1 | 0 | # | ob  |
| 3750 | 1 | 6 | -0.950000 | -9.967000490  | -6.041354729  | 18.956143562  | 1 | 1 | 0 | # | oht |
| 3751 | 1 | 3 | -1.050000 | -7.382440482  | -6.041077613  | -10.623499070 | 1 | 1 | 0 | # | ob  |
| 3752 | 1 | 4 | -0.950000 | -9.351782553  | -8.354042618  | -10.442888188 | 1 | 1 | 0 | # | ob  |
| 3753 | 1 | 7 | -0.950000 | -6.766529560  | -8.366735269  | -14.669940000 | 1 | 1 | 0 | # | oho |
| 3754 | 1 | 3 | -1.050000 | -7.956609054  | -6.317606791  | 17.316796118  | 1 | 1 | 0 | # | ob  |
| 3755 | 1 | 3 | -1.050000 | -5.362324007  | -6.333759730  | -12.250261108 | 1 | 1 | 0 | # | ob  |
| 3756 | 1 | 4 | -0.950000 | -8.722234277  | -10.312589933 | -9.316970730  | 1 | 1 | 0 | # | oh  |
| 3757 | 1 | 3 | -1.050000 | -10.125648515 | -12.345953389 | -11.736283302 | 1 | 1 | 0 | # | ob  |
| 3758 | 1 | 4 | -0.950000 | -6.136623532  | -10.324863219 | -13.543440393 | 1 | 1 | 0 | # | oh  |
| 3759 | 1 | 3 | -1.050000 | -7.531930266  | -12.361777046 | -15.954835566 | 1 | 1 | 0 | # | ob  |
| 3760 | 1 | 3 | -1.050000 | -9.325662728  | -8.292941387  | -13.545357722 | 1 | 1 | 0 | # | ob  |
| 3761 | 1 | 3 | -1.050000 | -6.752114866  | -8.285734762  | -9.311324339  | 1 | 1 | 0 | # | ob  |
| 3762 | 1 | 3 | -1.050000 | -5.769762377  | -10.403223292 | -16.217460028 | 1 | 1 | 0 | # | ob  |
| 3763 | 1 | 3 | -1.050000 | -10.091865415 | -12.638466293 | -15.043023632 | 1 | 1 | 0 | # | ob  |
| 3764 | 1 | 3 | -1.050000 | -7.517912729  | -12.635163569 | -10.814842275 | 1 | 1 | 0 | # | ob  |
| 3765 | 1 | 5 | 2.100000  | -9.448596523  | -6.663500962  | -13.446713478 | 1 | 1 | 0 | # | st  |

|      |   |   |           |               |               |               |   |   |   |   |     |
|------|---|---|-----------|---------------|---------------|---------------|---|---|---|---|-----|
| 3766 | 1 | 5 | 2.100000  | -6.876570783  | -6.654519659  | -9.218820449  | 1 | 1 | 0 | # | st  |
| 3767 | 1 | 5 | 2.100000  | -5.953223949  | -12.022163392 | -16.155125016 | 1 | 1 | 0 | # | st  |
| 3768 | 1 | 5 | 2.100000  | -8.611866039  | -12.024860033 | -14.767921646 | 1 | 1 | 0 | # | st  |
| 3769 | 1 | 5 | 2.100000  | -6.039449750  | -12.015782580 | -10.540175727 | 1 | 1 | 0 | # | st  |
| 3770 | 1 | 5 | 2.100000  | -9.535321161  | -6.657050089  | 17.517161151  | 1 | 1 | 0 | # | st  |
| 3771 | 1 | 5 | 2.100000  | -6.946927332  | -6.660702575  | -12.059455955 | 1 | 1 | 0 | # | st  |
| 3772 | 1 | 5 | 2.100000  | -8.541181255  | -12.018795815 | -11.927421788 | 1 | 1 | 0 | # | st  |
| 3773 | 1 | 1 | 1.575000  | -7.760648102  | -9.326242674  | -2.106452507  | 1 | 1 | 0 | # | ao  |
| 3774 | 1 | 1 | 1.575000  | -5.173508114  | -9.336267335  | -6.329552507  | 1 | 1 | 0 | # | ao  |
| 3775 | 1 | 1 | 1.575000  | -10.315124157 | -9.343085446  | -0.757989037  | 1 | 1 | 0 | # | ao  |
| 3776 | 1 | 1 | 1.575000  | -7.728120700  | -9.353073074  | -4.981097695  | 1 | 1 | 0 | # | ao  |
| 3777 | 1 | 2 | 0.425000  | -7.209244145  | -7.958936629  | -6.987748987  | 1 | 1 | 0 | # | ho  |
| 3778 | 1 | 2 | 0.425000  | -9.779677472  | -7.860595847  | -2.718287538  | 1 | 1 | 0 | # | ho  |
| 3779 | 1 | 2 | 0.425000  | -5.707935677  | -10.814890090 | -4.366998978  | 1 | 1 | 0 | # | ho  |
| 3780 | 1 | 2 | 0.425000  | -8.279532585  | -10.720857339 | -0.100174810  | 1 | 1 | 0 | # | ho  |
| 3781 | 3 | 3 | -1.050000 | -8.351279233  | -10.401549350 | -3.540819251  | 1 | 1 | 0 | # | ob  |
| 3782 | 1 | 3 | -1.050000 | -8.736316052  | -10.393634011 | -6.225770135  | 1 | 1 | 0 | # | ob  |
| 3783 | 1 | 3 | -1.050000 | -6.162779590  | -10.386335530 | -1.992022885  | 1 | 1 | 0 | # | ob  |
| 3784 | 1 | 3 | -1.050000 | -8.105849550  | -12.638429459 | -4.913787416  | 1 | 1 | 0 | # | ob  |
| 3785 | 1 | 3 | -1.050000 | -5.521265058  | -12.637628090 | -0.694848299  | 1 | 1 | 0 | # | ob  |
| 3786 | 1 | 3 | -1.050000 | -9.718994217  | -8.275939116  | -7.769166009  | 1 | 1 | 0 | # | ob  |
| 3787 | 1 | 3 | -1.050000 | -7.137424505  | -8.277784485  | -3.546748257  | 1 | 1 | 0 | # | ob  |
| 3788 | 1 | 3 | -1.050000 | -7.970074866  | -6.044156828  | -4.722452555  | 1 | 1 | 0 | # | ob  |
| 3789 | 1 | 3 | -1.050000 | -5.396657334  | -6.040640091  | -0.494130207  | 1 | 1 | 0 | # | ob  |
| 3790 | 1 | 3 | -1.050000 | -9.967000490  | -6.041354729  | -6.392656438  | 1 | 1 | 0 | # | ob  |
| 3791 | 1 | 3 | -1.050000 | -7.382440482  | -6.041077613  | -2.173899070  | 1 | 1 | 0 | # | ob  |
| 3792 | 1 | 4 | -0.950000 | -9.351782553  | -8.354042618  | -1.993288188  | 1 | 1 | 0 | # | oh  |
| 3793 | 1 | 4 | -0.950000 | -6.766529560  | -8.366735269  | -6.220340000  | 1 | 1 | 0 | # | oh  |
| 3794 | 1 | 3 | -1.050000 | -7.956609054  | -6.317606791  | -8.032003882  | 1 | 1 | 0 | # | ob  |
| 3795 | 1 | 3 | -1.050000 | -5.362324007  | -6.333759730  | -3.800661108  | 1 | 1 | 0 | # | ob  |
| 3796 | 1 | 4 | -0.950000 | -8.722234277  | -10.312589933 | -0.867370730  | 1 | 1 | 0 | # | oh  |
| 3797 | 1 | 3 | -1.050000 | -10.125648515 | -12.345953389 | -3.286683302  | 1 | 1 | 0 | # | ob  |
| 3798 | 1 | 4 | -0.950000 | -6.136623532  | -10.324863219 | -5.093840393  | 1 | 1 | 0 | # | oh  |
| 3799 | 1 | 3 | -1.050000 | -7.531930266  | -12.361777046 | -7.505235566  | 1 | 1 | 0 | # | ob  |
| 3800 | 1 | 3 | -1.050000 | -9.325662728  | -8.292941387  | -5.095757722  | 1 | 1 | 0 | # | ob  |
| 3801 | 1 | 3 | -1.050000 | -6.752114866  | -8.285734762  | -0.861724339  | 1 | 1 | 0 | # | ob  |
| 3802 | 1 | 3 | -1.050000 | -5.769762377  | -10.403223292 | -7.767860028  | 1 | 1 | 0 | # | ob  |
| 3803 | 1 | 3 | -1.050000 | -10.091865415 | -12.638466293 | -6.593423632  | 1 | 1 | 0 | # | ob  |
| 3804 | 1 | 3 | -1.050000 | -7.517912729  | -12.635163569 | -2.365242275  | 1 | 1 | 0 | # | ob  |
| 3805 | 1 | 5 | 2.100000  | -9.448596523  | -6.663500962  | -4.997113478  | 1 | 1 | 0 | # | st  |
| 3806 | 1 | 5 | 2.100000  | -6.876570783  | -6.654519659  | -0.769220449  | 1 | 1 | 0 | # | st  |
| 3807 | 1 | 5 | 2.100000  | -5.953223949  | -12.022163392 | -7.705525016  | 1 | 1 | 0 | # | st  |
| 3808 | 1 | 5 | 2.100000  | -8.611866039  | -12.024860033 | -6.318321646  | 1 | 1 | 0 | # | st  |
| 3809 | 1 | 5 | 2.100000  | -6.039449750  | -12.015782580 | -2.090575727  | 1 | 1 | 0 | # | st  |
| 3810 | 1 | 5 | 2.100000  | -9.535321161  | -6.657050089  | -7.831638849  | 1 | 1 | 0 | # | st  |
| 3811 | 1 | 5 | 2.100000  | -6.946927332  | -6.660702575  | -3.609855955  | 1 | 1 | 0 | # | st  |
| 3812 | 1 | 5 | 2.100000  | -8.541181255  | -12.018795815 | -3.477821788  | 1 | 1 | 0 | # | st  |
| 3813 | 1 | 6 | -0.950000 | -5.479548817  | -12.018171151 | 16.634714390  | 1 | 1 | 0 | # | oht |
| 3814 | 1 | 6 | -0.950000 | -9.735393535  | -6.422615341  | -15.319631379 | 1 | 1 | 0 | # | oht |
| 3815 | 1 | 2 | 0.425000  | -9.895636833  | -6.305444923  | -16.411736324 | 1 | 1 | 0 | # | ho  |
| 3816 | 1 | 2 | 0.425000  | -5.314810057  | -12.368058974 | -18.650841835 | 1 | 1 | 0 | # | ho  |
| 3817 | 1 | 2 | 0.425000  | -9.890161041  | -6.134001635  | 20.059598264  | 1 | 1 | 0 | # | ho  |
| 3818 | 1 | 2 | 0.425000  | -5.867766564  | -11.917786233 | 17.669755394  | 1 | 1 | 0 | # | ho  |
| 3819 | 1 | 1 | 1.575000  | -2.597848102  | -9.326242674  | 6.343147493   | 1 | 1 | 0 | # | ao  |
| 3820 | 1 | 1 | 1.575000  | -0.010708114  | -9.336267335  | 2.120047493   | 1 | 1 | 0 | # | ao  |
| 3821 | 1 | 1 | 1.575000  | -5.152324157  | -9.343085446  | 7.691610963   | 1 | 1 | 0 | # | ao  |
| 3822 | 1 | 1 | 1.575000  | -2.565320700  | -9.353073074  | 3.468502305   | 1 | 1 | 0 | # | ao  |
| 3823 | 1 | 2 | 0.425000  | -2.046444145  | -7.958936629  | 1.461851013   | 1 | 1 | 0 | # | ho  |
| 3824 | 1 | 2 | 0.425000  | -4.616877472  | -7.860595847  | 5.731312462   | 1 | 1 | 0 | # | ho  |
| 3825 | 1 | 2 | 0.425000  | -0.545135677  | -10.814890090 | 4.082601022   | 1 | 1 | 0 | # | ho  |
| 3826 | 1 | 2 | 0.425000  | -3.116732585  | -10.720857339 | 8.349425190   | 1 | 1 | 0 | # | ho  |
| 3827 | 1 | 3 | -1.050000 | -3.188479233  | -10.401549350 | 4.908780749   | 1 | 1 | 0 | # | ob  |
| 3828 | 1 | 3 | -1.050000 | -3.573516052  | -10.393634011 | 2.223829865   | 1 | 1 | 0 | # | ob  |
| 3829 | 1 | 3 | -1.050000 | -0.999979590  | -10.386335530 | 6.457577115   | 1 | 1 | 0 | # | ob  |
| 3830 | 1 | 3 | -1.050000 | -2.943049550  | -12.638429459 | 3.535812584   | 1 | 1 | 0 | # | ob  |
| 3831 | 1 | 3 | -1.050000 | -0.358456058  | -12.637628090 | 7.754751701   | 1 | 1 | 0 | # | ob  |
| 3832 | 1 | 3 | -1.050000 | -4.556194217  | -8.275939116  | 0.680433991   | 1 | 1 | 0 | # | ob  |
| 3833 | 1 | 3 | -1.050000 | -1.974624505  | -8.277784485  | 4.902851743   | 1 | 1 | 0 | # | ob  |
| 3834 | 1 | 3 | -1.050000 | -2.807274866  | -6.044156828  | 3.727147445   | 1 | 1 | 0 | # | ob  |
| 3835 | 1 | 3 | -1.050000 | -0.233857334  | -6.040640091  | 7.955469793   | 1 | 1 | 0 | # | ob  |
| 3836 | 1 | 3 | -1.050000 | -4.804200490  | -6.041354729  | 2.056943562   | 1 | 1 | 0 | # | ob  |
| 3837 | 1 | 3 | -1.050000 | -2.219640482  | -6.041077613  | 6.275700930   | 1 | 1 | 0 | # | ob  |
| 3838 | 1 | 4 | -0.950000 | -4.188982553  | -8.354042618  | 6.456311812   | 1 | 1 | 0 | # | oh  |
| 3839 | 1 | 4 | -0.950000 | -1.603729560  | -8.366735269  | 2.229260000   | 1 | 1 | 0 | # | oh  |
| 3840 | 1 | 3 | -1.050000 | -2.793809054  | -6.317606791  | 0.417596118   | 1 | 1 | 0 | # | ob  |
| 3841 | 1 | 3 | -1.050000 | -0.199524007  | -6.333759730  | 4.648938892   | 1 | 1 | 0 | # | ob  |
| 3842 | 1 | 4 | -0.950000 | -3.559434277  | -10.312589933 | 7.582229270   | 1 | 1 | 0 | # | oh  |
| 3843 | 1 | 3 | -1.050000 | -4.962848515  | -12.345953389 | 5.162916698   | 1 | 1 | 0 | # | ob  |
| 3844 | 1 | 4 | -0.950000 | -0.973823532  | -10.324863219 | 3.355759607   | 1 | 1 | 0 | # | oh  |
| 3845 | 1 | 3 | -1.050000 | -2.369130266  | -12.361777046 | 0.944364434   | 1 | 1 | 0 | # | ob  |
| 3846 | 1 | 3 | -1.050000 | -4.162862728  | -8.292941387  | 3.353842278   | 1 | 1 | 0 | # | ob  |
| 3847 | 1 | 3 | -1.050000 | -1.589314866  | -8.285734762  | 7.587875661   | 1 | 1 | 0 | # | ob  |
| 3848 | 1 | 3 | -1.050000 | -0.606962377  | -10.403223292 | 0.681739972   | 1 | 1 | 0 | # | ob  |
| 3849 | 1 | 3 | -1.050000 | -4.929065415  | -12.638466293 | 1.856176368   | 1 | 1 | 0 | # | ob  |
| 3850 | 1 | 3 | -1.050000 | -2.355112729  | -12.635163569 | 6.084357725   | 1 | 1 | 0 | # | ob  |
| 3851 | 1 | 5 | 2.100000  | -4.285796523  | -6.663500962  | 3.452486522   | 1 | 1 | 0 | # | st  |
| 3852 | 1 | 5 | 2.100000  | -1.713770783  | -6.654519659  | 7.680379551   | 1 | 1 | 0 | # | st  |
| 3853 | 1 | 5 | 2.100000  | -0.790423949  | -12.022163392 | 0.744074984   | 1 | 1 | 0 | # | st  |
| 3854 | 1 | 5 | 2.100000  | -3.449066039  | -12.024860033 | 2.131278354   | 1 | 1 | 0 | # | st  |
| 3855 | 1 | 5 | 2.100000  | -0.876649750  | -12.015782580 | 6.359024273   | 1 | 1 | 0 | # | st  |
| 3856 | 1 | 5 | 2.100000  | -4.372521161  | -6.657050089  | 0.617961151   | 1 | 1 | 0 | # | st  |
| 3857 | 1 | 5 | 2.100000  | -1.784127332  | -6.660702575  | 4.839744045   | 1 | 1 | 0 | # | st  |
| 3858 | 1 | 5 | 2.100000  | -3.378381255  | -12.018795815 | 4.971778212   | 1 | 1 | 0 | # | st  |

|      |   |   |           |              |               |               |   |   |   |   |     |
|------|---|---|-----------|--------------|---------------|---------------|---|---|---|---|-----|
| 3859 | 1 | 1 | 1.575000  | -2.597848102 | -9.326242674  | 14.792747493  | 1 | 1 | 0 | # | ao  |
| 3860 | 1 | 1 | 1.575000  | -0.010708114 | -9.336267335  | 10.569647493  | 1 | 1 | 0 | # | ao  |
| 3861 | 1 | 1 | 1.575000  | -5.152324157 | -9.343085446  | 16.141210963  | 1 | 1 | 0 | # | ao  |
| 3862 | 1 | 1 | 1.575000  | -2.565320700 | -9.353073074  | 11.918102305  | 1 | 1 | 0 | # | ao  |
| 3863 | 1 | 2 | 0.425000  | -2.046444145 | -7.958936629  | 9.911451013   | 1 | 1 | 0 | # | ho  |
| 3864 | 1 | 2 | 0.425000  | -4.616877472 | -7.860595847  | 14.180912462  | 1 | 1 | 0 | # | ho  |
| 3865 | 1 | 2 | 0.425000  | -0.545135677 | -10.814890090 | 12.532201022  | 1 | 1 | 0 | # | ho  |
| 3866 | 1 | 2 | 0.425000  | -3.116732585 | -10.720857339 | 16.799025190  | 1 | 1 | 0 | # | ho  |
| 3867 | 1 | 3 | -1.050000 | -3.188479233 | -10.401549350 | 13.358380749  | 1 | 1 | 0 | # | ob  |
| 3868 | 1 | 3 | -1.050000 | -3.573516052 | -10.393634011 | 10.673429865  | 1 | 1 | 0 | # | ob  |
| 3869 | 1 | 3 | -1.050000 | -0.999979590 | -10.386335530 | 14.907177115  | 1 | 1 | 0 | # | ob  |
| 3870 | 1 | 3 | -1.050000 | -2.943049550 | -12.638429459 | 11.985412584  | 1 | 1 | 0 | # | ob  |
| 3871 | 1 | 6 | -0.950000 | -0.358456058 | -12.637628090 | -17.594048299 | 1 | 1 | 0 | # | oht |
| 3872 | 1 | 3 | -1.050000 | -4.556194217 | -8.275939116  | 9.130033991   | 1 | 1 | 0 | # | ob  |
| 3873 | 1 | 3 | -1.050000 | -1.974624505 | -8.277784485  | 13.352451743  | 1 | 1 | 0 | # | ob  |
| 3874 | 1 | 3 | -1.050000 | -2.807274866 | -6.044156828  | 12.176747445  | 1 | 1 | 0 | # | ob  |
| 3875 | 1 | 3 | -1.050000 | -0.233857334 | -6.040640091  | 16.405069793  | 1 | 1 | 0 | # | ob  |
| 3876 | 1 | 3 | -1.050000 | -4.804200490 | -6.041354729  | 10.506543562  | 1 | 1 | 0 | # | ob  |
| 3877 | 1 | 3 | -1.050000 | -2.219640482 | -6.041077613  | 14.725300930  | 1 | 1 | 0 | # | ob  |
| 3878 | 1 | 4 | -0.950000 | -4.188982553 | -8.354042618  | 14.905911812  | 1 | 1 | 0 | # | oh  |
| 3879 | 1 | 4 | -0.950000 | -1.603729560 | -8.366735269  | 10.678860000  | 1 | 1 | 0 | # | oh  |
| 3880 | 1 | 3 | -1.050000 | -2.793809054 | -6.317606791  | 8.867196118   | 1 | 1 | 0 | # | ob  |
| 3881 | 1 | 3 | -1.050000 | -0.199524007 | -6.333759730  | 13.098538892  | 1 | 1 | 0 | # | ob  |
| 3882 | 1 | 7 | -0.950000 | -3.559434277 | -10.312589933 | 16.031829270  | 1 | 1 | 0 | # | oho |
| 3883 | 1 | 3 | -1.050000 | -4.962848515 | -12.345953389 | 13.612516698  | 1 | 1 | 0 | # | ob  |
| 3884 | 1 | 4 | -0.950000 | -0.973823532 | -10.324863219 | 11.805359607  | 1 | 1 | 0 | # | oh  |
| 3885 | 1 | 3 | -1.050000 | -2.369130266 | -12.361777046 | 9.393964434   | 1 | 1 | 0 | # | ob  |
| 3886 | 1 | 3 | -1.050000 | -4.162867278 | -8.292941387  | 11.803442278  | 1 | 1 | 0 | # | ob  |
| 3887 | 1 | 3 | -1.050000 | -1.589314866 | -8.285734762  | 16.037475661  | 1 | 1 | 0 | # | ob  |
| 3888 | 1 | 3 | -1.050000 | -0.606962377 | -10.403223292 | 9.131339972   | 1 | 1 | 0 | # | ob  |
| 3889 | 1 | 3 | -1.050000 | -4.929065415 | -12.638466293 | 10.305776368  | 1 | 1 | 0 | # | ob  |
| 3890 | 1 | 3 | -1.050000 | -2.355112729 | -12.635163569 | 14.533957725  | 1 | 1 | 0 | # | ob  |
| 3891 | 1 | 5 | 2.100000  | -4.285796523 | -6.663500962  | 11.902086522  | 1 | 1 | 0 | # | st  |
| 3892 | 1 | 5 | 2.100000  | -1.713770783 | -6.654519659  | 16.129979551  | 1 | 1 | 0 | # | st  |
| 3893 | 1 | 5 | 2.100000  | -0.790423949 | -12.022163392 | 9.193674984   | 1 | 1 | 0 | # | st  |
| 3894 | 1 | 5 | 2.100000  | -3.449066039 | -12.024860033 | 10.580878354  | 1 | 1 | 0 | # | st  |
| 3895 | 1 | 5 | 2.100000  | -0.876649750 | -12.015782580 | 14.808624273  | 1 | 1 | 0 | # | st  |
| 3896 | 1 | 5 | 2.100000  | -4.372521161 | -6.657050089  | 9.067561151   | 1 | 1 | 0 | # | st  |
| 3897 | 1 | 5 | 2.100000  | -1.784127332 | -6.660702575  | 13.289344045  | 1 | 1 | 0 | # | st  |
| 3898 | 1 | 5 | 2.100000  | -3.378381255 | -12.018795815 | 13.421378212  | 1 | 1 | 0 | # | st  |
| 3899 | 1 | 1 | 1.575000  | -2.597848102 | -9.326242674  | -10.556052507 | 1 | 1 | 0 | # | ao  |
| 3900 | 1 | 1 | 1.575000  | -0.010708114 | -9.336267335  | -14.779152507 | 1 | 1 | 0 | # | ao  |
| 3901 | 1 | 1 | 1.575000  | -5.152324157 | -9.343085446  | -9.207589037  | 1 | 1 | 0 | # | ao  |
| 3902 | 1 | 1 | 1.575000  | -2.565320700 | -9.353073074  | -13.430697695 | 1 | 1 | 0 | # | ao  |
| 3903 | 1 | 2 | 0.425000  | -2.046444145 | -7.958936629  | -15.437348987 | 1 | 1 | 0 | # | ho  |
| 3904 | 1 | 2 | 0.425000  | -4.616877472 | -7.860595847  | -11.167887538 | 1 | 1 | 0 | # | ho  |
| 3905 | 1 | 2 | 0.425000  | -0.545135677 | -10.814890090 | -12.816598978 | 1 | 1 | 0 | # | ho  |
| 3906 | 1 | 2 | 0.425000  | -3.116732585 | -10.720857339 | -8.549774810  | 1 | 1 | 0 | # | ho  |
| 3907 | 1 | 3 | -1.050000 | -3.188479233 | -10.401549350 | -11.990419251 | 1 | 1 | 0 | # | ob  |
| 3908 | 1 | 3 | -1.050000 | -3.573516052 | -10.393634011 | -14.675370135 | 1 | 1 | 0 | # | ob  |
| 3909 | 1 | 3 | -1.050000 | -0.999979590 | -10.386335530 | -10.441622885 | 1 | 1 | 0 | # | ob  |
| 3910 | 1 | 3 | -1.050000 | -2.943049550 | -12.638429459 | -13.363387416 | 1 | 1 | 0 | # | ob  |
| 3911 | 1 | 3 | -1.050000 | -0.358456058 | -12.637628090 | -9.144448299  | 1 | 1 | 0 | # | ob  |
| 3912 | 1 | 3 | -1.050000 | -4.556194217 | -8.275939116  | 17.579633991  | 1 | 1 | 0 | # | ob  |
| 3913 | 1 | 3 | -1.050000 | -1.974624505 | -8.277784485  | -11.996348257 | 1 | 1 | 0 | # | ob  |
| 3914 | 1 | 3 | -1.050000 | -2.807274866 | -6.044156828  | -13.172052555 | 1 | 1 | 0 | # | ob  |
| 3915 | 1 | 3 | -1.050000 | -0.233857334 | -6.040640091  | -8.943730207  | 1 | 1 | 0 | # | ob  |
| 3916 | 1 | 6 | -0.950000 | -4.804200490 | -6.041354729  | 18.956143562  | 1 | 1 | 0 | # | oht |
| 3917 | 1 | 3 | -1.050000 | -2.219640482 | -6.041077613  | -10.623499070 | 1 | 1 | 0 | # | ob  |
| 3918 | 1 | 4 | -0.950000 | -4.188982553 | -8.354042618  | -10.442888188 | 1 | 1 | 0 | # | oh  |
| 3919 | 1 | 7 | -0.950000 | -1.603729560 | -8.366735269  | -14.669940000 | 1 | 1 | 0 | # | oho |
| 3920 | 1 | 3 | -1.050000 | -2.793809054 | -6.317606791  | 17.316796118  | 1 | 1 | 0 | # | ob  |
| 3921 | 1 | 3 | -1.050000 | -0.199524007 | -6.333759730  | -12.250261108 | 1 | 1 | 0 | # | ob  |
| 3922 | 1 | 4 | -0.950000 | -3.559434277 | -10.312589933 | -9.316970730  | 1 | 1 | 0 | # | oh  |
| 3923 | 1 | 3 | -1.050000 | -4.962848515 | -12.345953389 | -11.736283302 | 1 | 1 | 0 | # | ob  |
| 3924 | 1 | 4 | -0.950000 | -0.973823532 | -10.324863219 | -13.543440393 | 1 | 1 | 0 | # | oh  |
| 3925 | 1 | 3 | -1.050000 | -2.369130266 | -12.361777046 | -15.954835566 | 1 | 1 | 0 | # | ob  |
| 3926 | 1 | 3 | -1.050000 | -4.162867278 | -8.292941387  | -13.545357722 | 1 | 1 | 0 | # | ob  |
| 3927 | 1 | 3 | -1.050000 | -1.589314866 | -8.285734762  | -9.311324339  | 1 | 1 | 0 | # | ob  |
| 3928 | 1 | 3 | -1.050000 | -0.606962377 | -10.403223292 | -16.217460028 | 1 | 1 | 0 | # | ob  |
| 3929 | 1 | 3 | -1.050000 | -4.929065415 | -12.638466293 | -15.043023632 | 1 | 1 | 0 | # | ob  |
| 3930 | 1 | 3 | -1.050000 | -2.355112729 | -12.635163569 | -10.814842275 | 1 | 1 | 0 | # | ob  |
| 3931 | 1 | 5 | 2.100000  | -4.285796523 | -6.663500962  | -13.446713478 | 1 | 1 | 0 | # | st  |
| 3932 | 1 | 5 | 2.100000  | -1.713770783 | -6.654519659  | -9.218820449  | 1 | 1 | 0 | # | st  |
| 3933 | 1 | 5 | 2.100000  | -0.790423949 | -12.022163392 | -16.155125016 | 1 | 1 | 0 | # | st  |
| 3934 | 1 | 5 | 2.100000  | -3.449066039 | -12.024860033 | -14.767921646 | 1 | 1 | 0 | # | st  |
| 3935 | 1 | 5 | 2.100000  | -0.876649750 | -12.015782580 | -10.540175727 | 1 | 1 | 0 | # | st  |
| 3936 | 1 | 5 | 2.100000  | -4.372521161 | -6.657050089  | 17.517161151  | 1 | 1 | 0 | # | st  |
| 3937 | 1 | 5 | 2.100000  | -1.784127332 | -6.660702575  | -12.059455955 | 1 | 1 | 0 | # | st  |
| 3938 | 1 | 5 | 2.100000  | -3.378381255 | -12.018795815 | -11.927421788 | 1 | 1 | 0 | # | st  |
| 3939 | 1 | 1 | 1.575000  | -2.597848102 | -9.326242674  | -2.106452507  | 1 | 1 | 0 | # | ao  |
| 3940 | 1 | 1 | 1.575000  | -0.010708114 | -9.336267335  | -6.329552507  | 1 | 1 | 0 | # | ao  |
| 3941 | 1 | 1 | 1.575000  | -5.152324157 | -9.343085446  | -0.757989037  | 1 | 1 | 0 | # | ao  |
| 3942 | 1 | 1 | 1.575000  | -2.565320700 | -9.353073074  | -4.981097695  | 1 | 1 | 0 | # | ao  |
| 3943 | 1 | 2 | 0.425000  | -2.046444145 | -7.958936629  | -6.987748987  | 1 | 1 | 0 | # | ho  |
| 3944 | 1 | 2 | 0.425000  | -4.616877472 | -7.860595847  | -2.718287538  | 1 | 1 | 0 | # | ho  |
| 3945 | 1 | 2 | 0.425000  | -0.545135677 | -10.814890090 | -4.366998978  | 1 | 1 | 0 | # | ho  |
| 3946 | 1 | 2 | 0.425000  | -3.116732585 | -10.720857339 | -0.100174810  | 1 | 1 | 0 | # | ho  |
| 3947 | 1 | 3 | -1.050000 | -3.188479233 | -10.401549350 | -3.540819251  | 1 | 1 | 0 | # | ob  |
| 3948 | 1 | 3 | -1.050000 | -3.573516052 | -10.393634011 | -6.225770135  | 1 | 1 | 0 | # | ob  |
| 3949 | 1 | 3 | -1.050000 | -0.999979590 | -10.386335530 | -1.992022885  | 1 | 1 | 0 | # | ob  |
| 3950 | 1 | 3 | -1.050000 | -2.943049550 | -12.638429459 | -4.913787416  | 1 | 1 | 0 | # | ob  |
| 3951 | 1 | 3 | -1.050000 | -0.358456058 | -12.637628090 | -0.694848299  | 1 | 1 | 0 | # | ob  |

|      |   |   |           |              |               |               |   |   |   |   |     |
|------|---|---|-----------|--------------|---------------|---------------|---|---|---|---|-----|
| 3952 | 1 | 3 | -1.050000 | -4.556194217 | -8.275939116  | -7.769166009  | 1 | 1 | 0 | # | ob  |
| 3953 | 1 | 3 | -1.050000 | -1.974624505 | -8.277784485  | -3.546748257  | 1 | 1 | 0 | # | ob  |
| 3954 | 1 | 3 | -1.050000 | -2.807274866 | -6.044156828  | -4.722452555  | 1 | 1 | 0 | # | ob  |
| 3955 | 1 | 3 | -1.050000 | -0.233857334 | -6.040640091  | -0.494130207  | 1 | 1 | 0 | # | ob  |
| 3956 | 1 | 3 | -1.050000 | -4.804200490 | -6.041354729  | -6.392656438  | 1 | 1 | 0 | # | ob  |
| 3957 | 1 | 3 | -1.050000 | -2.219640482 | -6.041077613  | -2.173899070  | 1 | 1 | 0 | # | ob  |
| 3958 | 1 | 4 | -0.950000 | -4.188982553 | -8.354042618  | -1.993288188  | 1 | 1 | 0 | # | oh  |
| 3959 | 1 | 4 | -0.950000 | -1.603729560 | -8.366735269  | -6.220340000  | 1 | 1 | 0 | # | oh  |
| 3960 | 1 | 3 | -1.050000 | -2.793809054 | -6.317606791  | -8.032003882  | 1 | 1 | 0 | # | ob  |
| 3961 | 1 | 3 | -1.050000 | -0.199524007 | -6.333759730  | -3.800661108  | 1 | 1 | 0 | # | ob  |
| 3962 | 1 | 4 | -0.950000 | -3.559434277 | -10.312589933 | -0.867370730  | 1 | 1 | 0 | # | oh  |
| 3963 | 1 | 3 | -1.050000 | -4.962848515 | -12.345953389 | -3.286683302  | 1 | 1 | 0 | # | ob  |
| 3964 | 1 | 4 | -0.950000 | -0.973823532 | -10.324863219 | -5.093840393  | 1 | 1 | 0 | # | oh  |
| 3965 | 1 | 3 | -1.050000 | -2.369130266 | -12.361777046 | -7.505235566  | 1 | 1 | 0 | # | ob  |
| 3966 | 1 | 3 | -1.050000 | -4.162862728 | -8.292941387  | -5.095757722  | 1 | 1 | 0 | # | ob  |
| 3967 | 1 | 3 | -1.050000 | -1.589314866 | -8.285734762  | -0.861724339  | 1 | 1 | 0 | # | ob  |
| 3968 | 1 | 3 | -1.050000 | -0.606962377 | -10.403223292 | -7.767860028  | 1 | 1 | 0 | # | ob  |
| 3969 | 1 | 3 | -1.050000 | -4.929065415 | -12.638466293 | -6.593423632  | 1 | 1 | 0 | # | ob  |
| 3970 | 1 | 3 | -1.050000 | -2.355112729 | -12.635163569 | -2.365242275  | 1 | 1 | 0 | # | ob  |
| 3971 | 1 | 5 | 2.100000  | -4.285796523 | -6.663500962  | -4.997113478  | 1 | 1 | 0 | # | st  |
| 3972 | 1 | 5 | 2.100000  | -1.713770783 | -6.654519659  | -0.769220449  | 1 | 1 | 0 | # | st  |
| 3973 | 1 | 5 | 2.100000  | -0.790423949 | -12.022163392 | -7.705525016  | 1 | 1 | 0 | # | st  |
| 3974 | 1 | 5 | 2.100000  | -3.449066039 | -12.024860033 | -6.318321646  | 1 | 1 | 0 | # | st  |
| 3975 | 1 | 5 | 2.100000  | -0.876649750 | -12.015782580 | -2.090575727  | 1 | 1 | 0 | # | st  |
| 3976 | 1 | 5 | 2.100000  | -4.372521161 | -6.657050089  | -7.831638849  | 1 | 1 | 0 | # | st  |
| 3977 | 1 | 5 | 2.100000  | -1.784127332 | -6.660702575  | -3.609855955  | 1 | 1 | 0 | # | st  |
| 3978 | 1 | 5 | 2.100000  | -3.378381255 | -12.018795815 | -3.477821788  | 1 | 1 | 0 | # | st  |
| 3979 | 1 | 6 | -0.950000 | -0.316748817 | -12.018171151 | 16.634714390  | 1 | 1 | 0 | # | oht |
| 3980 | 1 | 6 | -0.950000 | -4.572593535 | -6.422615341  | -15.319631379 | 1 | 1 | 0 | # | oht |
| 3981 | 1 | 2 | 0.425000  | -4.732836833 | -6.305444923  | -16.411736324 | 1 | 1 | 0 | # | ho  |
| 3982 | 1 | 2 | 0.425000  | -0.152010057 | -12.368058974 | -18.650841835 | 1 | 1 | 0 | # | ho  |
| 3983 | 1 | 2 | 0.425000  | -4.727361041 | -6.134001635  | 20.059598264  | 1 | 1 | 0 | # | ho  |
| 3984 | 1 | 2 | 0.425000  | -0.704966564 | -11.917786233 | 17.669755394  | 1 | 1 | 0 | # | ho  |

Bonds

|    |   |     |     |
|----|---|-----|-----|
| 1  | 1 | 5   | 21  |
| 2  | 1 | 6   | 20  |
| 3  | 1 | 7   | 26  |
| 4  | 1 | 8   | 24  |
| 5  | 1 | 45  | 61  |
| 6  | 1 | 46  | 60  |
| 7  | 1 | 47  | 66  |
| 8  | 2 | 48  | 64  |
| 9  | 3 | 164 | 53  |
| 10 | 2 | 85  | 101 |
| 11 | 1 | 86  | 100 |
| 12 | 1 | 87  | 106 |
| 13 | 1 | 88  | 104 |
| 14 | 3 | 165 | 98  |
| 15 | 1 | 125 | 141 |
| 16 | 1 | 126 | 140 |
| 17 | 1 | 127 | 146 |
| 18 | 1 | 128 | 144 |
| 19 | 3 | 166 | 161 |
| 20 | 3 | 163 | 162 |
| 21 | 1 | 171 | 187 |
| 22 | 1 | 172 | 186 |
| 23 | 1 | 173 | 192 |
| 24 | 1 | 174 | 190 |
| 25 | 1 | 211 | 227 |
| 26 | 1 | 212 | 226 |
| 27 | 1 | 213 | 232 |
| 28 | 2 | 214 | 230 |
| 29 | 3 | 330 | 219 |
| 30 | 2 | 251 | 267 |
| 31 | 1 | 252 | 266 |
| 32 | 1 | 253 | 272 |
| 33 | 1 | 254 | 270 |
| 34 | 3 | 331 | 264 |
| 35 | 1 | 291 | 307 |
| 36 | 1 | 292 | 306 |
| 37 | 1 | 293 | 312 |
| 38 | 1 | 294 | 310 |
| 39 | 3 | 332 | 327 |
| 40 | 3 | 329 | 328 |
| 41 | 1 | 337 | 353 |
| 42 | 1 | 338 | 352 |
| 43 | 1 | 339 | 358 |
| 44 | 1 | 340 | 356 |
| 45 | 1 | 377 | 393 |
| 46 | 1 | 378 | 392 |
| 47 | 1 | 379 | 398 |
| 48 | 2 | 380 | 396 |
| 49 | 3 | 496 | 385 |
| 50 | 2 | 417 | 433 |
| 51 | 1 | 418 | 432 |
| 52 | 1 | 419 | 438 |
| 53 | 1 | 420 | 436 |
| 54 | 3 | 497 | 430 |
| 55 | 1 | 457 | 473 |
| 56 | 1 | 458 | 472 |
| 57 | 1 | 459 | 478 |

58 1 460 476  
59 3 498 493  
60 3 495 494  
61 1 503 519  
62 1 504 518  
63 1 505 524  
64 1 506 522  
65 1 543 559  
66 1 544 558  
67 1 545 564  
68 2 546 562  
69 3 662 551  
70 2 583 599  
71 1 584 598  
72 1 585 604  
73 1 586 602  
74 3 663 596  
75 1 623 639  
76 1 624 638  
77 1 625 644  
78 1 626 642  
79 3 664 659  
80 3 661 660  
81 1 669 685  
82 1 670 684  
83 1 671 690  
84 1 672 688  
85 1 709 725  
86 1 710 724  
87 1 711 730  
88 2 712 728  
89 3 828 717  
90 2 749 765  
91 1 750 764  
92 1 751 770  
93 1 752 768  
94 3 829 762  
95 1 789 805  
96 1 790 804  
97 1 791 810  
98 1 792 808  
99 3 830 825  
100 3 827 826  
101 1 835 851  
102 1 836 850  
103 1 837 856  
104 1 838 854  
105 1 875 891  
106 1 876 890  
107 1 877 896  
108 2 878 894  
109 3 994 883  
110 2 915 931  
111 1 916 930  
112 1 917 936  
113 1 918 934  
114 3 995 928  
115 1 955 971  
116 1 956 970  
117 1 957 976  
118 1 958 974  
119 3 996 991  
120 3 993 992  
121 1 1001 1017  
122 1 1002 1016  
123 1 1003 1022  
124 1 1004 1020  
125 1 1041 1057  
126 1 1042 1056  
127 1 1043 1062  
128 2 1044 1060  
129 3 1160 1049  
130 2 1081 1097  
131 1 1082 1096  
132 1 1083 1102  
133 1 1084 1100  
134 3 1161 1094  
135 1 1121 1137  
136 1 1122 1136  
137 1 1123 1142  
138 1 1124 1140  
139 3 1162 1157  
140 3 1159 1158  
141 1 1167 1183  
142 1 1168 1182  
143 1 1169 1188  
144 1 1170 1186  
145 1 1207 1223  
146 1 1208 1222  
147 1 1209 1228  
148 2 1210 1226  
149 3 1326 1215  
150 2 1247 1263



|     |   |      |      |
|-----|---|------|------|
| 151 | 1 | 1248 | 1262 |
| 152 | 1 | 1249 | 1268 |
| 153 | 1 | 1250 | 1266 |
| 154 | 3 | 1327 | 1260 |
| 155 | 1 | 1287 | 1303 |
| 156 | 1 | 1288 | 1302 |
| 157 | 1 | 1289 | 1308 |
| 158 | 1 | 1290 | 1306 |
| 159 | 3 | 1328 | 1323 |
| 160 | 3 | 1325 | 1324 |
| 161 | 1 | 1333 | 1349 |
| 162 | 1 | 1334 | 1348 |
| 163 | 1 | 1335 | 1354 |
| 164 | 1 | 1336 | 1352 |
| 165 | 1 | 1373 | 1389 |
| 166 | 1 | 1374 | 1388 |
| 167 | 1 | 1375 | 1394 |
| 168 | 2 | 1376 | 1392 |
| 169 | 3 | 1492 | 1381 |
| 170 | 2 | 1413 | 1429 |
| 171 | 1 | 1414 | 1428 |
| 172 | 1 | 1415 | 1434 |
| 173 | 1 | 1416 | 1432 |
| 174 | 3 | 1493 | 1426 |
| 175 | 1 | 1453 | 1469 |
| 176 | 1 | 1454 | 1468 |
| 177 | 1 | 1455 | 1474 |
| 178 | 1 | 1456 | 1472 |
| 179 | 3 | 1494 | 1489 |
| 180 | 3 | 1491 | 1490 |
| 181 | 1 | 1499 | 1515 |
| 182 | 1 | 1500 | 1514 |
| 183 | 1 | 1501 | 1520 |
| 184 | 1 | 1502 | 1518 |
| 185 | 1 | 1539 | 1555 |
| 186 | 1 | 1540 | 1554 |
| 187 | 1 | 1541 | 1560 |
| 188 | 2 | 1542 | 1558 |
| 189 | 3 | 1658 | 1547 |
| 190 | 2 | 1579 | 1595 |
| 191 | 1 | 1580 | 1594 |
| 192 | 1 | 1581 | 1600 |
| 193 | 1 | 1582 | 1598 |
| 194 | 3 | 1659 | 1592 |
| 195 | 1 | 1619 | 1635 |
| 196 | 1 | 1620 | 1634 |
| 197 | 1 | 1621 | 1640 |
| 198 | 1 | 1622 | 1638 |
| 199 | 3 | 1660 | 1655 |
| 200 | 3 | 1657 | 1656 |
| 201 | 1 | 1665 | 1681 |
| 202 | 1 | 1666 | 1680 |
| 203 | 1 | 1667 | 1686 |
| 204 | 1 | 1668 | 1684 |
| 205 | 1 | 1705 | 1721 |
| 206 | 1 | 1706 | 1720 |
| 207 | 1 | 1707 | 1726 |
| 208 | 2 | 1708 | 1724 |
| 209 | 3 | 1824 | 1713 |
| 210 | 2 | 1745 | 1761 |
| 211 | 1 | 1746 | 1760 |
| 212 | 1 | 1747 | 1766 |
| 213 | 1 | 1748 | 1764 |
| 214 | 3 | 1825 | 1758 |
| 215 | 1 | 1785 | 1801 |
| 216 | 1 | 1786 | 1800 |
| 217 | 1 | 1787 | 1806 |
| 218 | 1 | 1788 | 1804 |
| 219 | 3 | 1826 | 1821 |
| 220 | 3 | 1823 | 1822 |
| 221 | 1 | 1831 | 1847 |
| 222 | 1 | 1832 | 1846 |
| 223 | 1 | 1833 | 1852 |
| 224 | 1 | 1834 | 1850 |
| 225 | 1 | 1871 | 1887 |
| 226 | 1 | 1872 | 1886 |
| 227 | 1 | 1873 | 1892 |
| 228 | 2 | 1874 | 1890 |
| 229 | 3 | 1990 | 1879 |
| 230 | 2 | 1911 | 1927 |
| 231 | 1 | 1912 | 1926 |
| 232 | 1 | 1913 | 1932 |
| 233 | 1 | 1914 | 1930 |
| 234 | 3 | 1991 | 1924 |
| 235 | 1 | 1951 | 1967 |
| 236 | 1 | 1952 | 1966 |
| 237 | 1 | 1953 | 1972 |
| 238 | 1 | 1954 | 1970 |
| 239 | 3 | 1992 | 1987 |
| 240 | 3 | 1989 | 1988 |
| 241 | 1 | 1997 | 2013 |
| 242 | 1 | 1998 | 2012 |
| 243 | 1 | 1999 | 2018 |

|     |   |      |      |
|-----|---|------|------|
| 244 | 1 | 2000 | 2016 |
| 245 | 1 | 2037 | 2053 |
| 246 | 1 | 2038 | 2052 |
| 247 | 1 | 2039 | 2058 |
| 248 | 2 | 2040 | 2056 |
| 249 | 3 | 2156 | 2045 |
| 250 | 2 | 2077 | 2093 |
| 251 | 1 | 2078 | 2092 |
| 252 | 1 | 2079 | 2098 |
| 253 | 1 | 2080 | 2096 |
| 254 | 3 | 2157 | 2090 |
| 255 | 1 | 2117 | 2133 |
| 256 | 1 | 2118 | 2132 |
| 257 | 1 | 2119 | 2138 |
| 258 | 1 | 2120 | 2136 |
| 259 | 3 | 2158 | 2153 |
| 260 | 3 | 2155 | 2154 |
| 261 | 1 | 2163 | 2179 |
| 262 | 1 | 2164 | 2178 |
| 263 | 1 | 2165 | 2184 |
| 264 | 1 | 2166 | 2182 |
| 265 | 1 | 2203 | 2219 |
| 266 | 1 | 2204 | 2218 |
| 267 | 1 | 2205 | 2224 |
| 268 | 2 | 2206 | 2222 |
| 269 | 3 | 2322 | 2211 |
| 270 | 2 | 2243 | 2259 |
| 271 | 1 | 2244 | 2258 |
| 272 | 1 | 2245 | 2264 |
| 273 | 1 | 2246 | 2262 |
| 274 | 3 | 2323 | 2256 |
| 275 | 1 | 2283 | 2299 |
| 276 | 1 | 2284 | 2298 |
| 277 | 1 | 2285 | 2304 |
| 278 | 1 | 2286 | 2302 |
| 279 | 3 | 2324 | 2319 |
| 280 | 3 | 2321 | 2320 |
| 281 | 1 | 2329 | 2345 |
| 282 | 1 | 2330 | 2344 |
| 283 | 1 | 2331 | 2350 |
| 284 | 1 | 2332 | 2348 |
| 285 | 1 | 2369 | 2385 |
| 286 | 1 | 2370 | 2384 |
| 287 | 1 | 2371 | 2390 |
| 288 | 2 | 2372 | 2388 |
| 289 | 3 | 2488 | 2377 |
| 290 | 2 | 2409 | 2425 |
| 291 | 1 | 2410 | 2424 |
| 292 | 1 | 2411 | 2430 |
| 293 | 1 | 2412 | 2428 |
| 294 | 3 | 2489 | 2422 |
| 295 | 1 | 2449 | 2465 |
| 296 | 1 | 2450 | 2464 |
| 297 | 1 | 2451 | 2470 |
| 298 | 1 | 2452 | 2468 |
| 299 | 3 | 2490 | 2485 |
| 300 | 3 | 2487 | 2486 |
| 301 | 1 | 2495 | 2511 |
| 302 | 1 | 2496 | 2510 |
| 303 | 1 | 2497 | 2516 |
| 304 | 1 | 2498 | 2514 |
| 305 | 1 | 2535 | 2551 |
| 306 | 1 | 2536 | 2550 |
| 307 | 1 | 2537 | 2556 |
| 308 | 2 | 2538 | 2554 |
| 309 | 3 | 2654 | 2543 |
| 310 | 2 | 2575 | 2591 |
| 311 | 1 | 2576 | 2590 |
| 312 | 1 | 2577 | 2596 |
| 313 | 1 | 2578 | 2594 |
| 314 | 3 | 2655 | 2588 |
| 315 | 1 | 2615 | 2631 |
| 316 | 1 | 2616 | 2630 |
| 317 | 1 | 2617 | 2636 |
| 318 | 1 | 2618 | 2634 |
| 319 | 3 | 2656 | 2651 |
| 320 | 3 | 2653 | 2652 |
| 321 | 1 | 2661 | 2677 |
| 322 | 1 | 2662 | 2676 |
| 323 | 1 | 2663 | 2682 |
| 324 | 1 | 2664 | 2680 |
| 325 | 1 | 2701 | 2717 |
| 326 | 1 | 2702 | 2716 |
| 327 | 1 | 2703 | 2722 |
| 328 | 2 | 2704 | 2720 |
| 329 | 3 | 2820 | 2709 |
| 330 | 2 | 2741 | 2757 |
| 331 | 1 | 2742 | 2756 |
| 332 | 1 | 2743 | 2762 |
| 333 | 1 | 2744 | 2760 |
| 334 | 3 | 2821 | 2754 |
| 335 | 1 | 2781 | 2797 |
| 336 | 1 | 2782 | 2796 |

337 1 2783 2802  
338 1 2784 2800  
339 3 2822 2817  
340 3 2819 2818  
341 1 2827 2843  
342 1 2828 2842  
343 1 2829 2848  
344 1 2830 2846  
345 1 2867 2883  
346 1 2868 2882  
347 1 2869 2888  
348 2 2870 2886  
349 3 2986 2875  
350 2 2907 2923  
351 1 2908 2922  
352 1 2909 2928  
353 1 2910 2926  
354 3 2987 2920  
355 1 2947 2963  
356 1 2948 2962  
357 1 2949 2968  
358 1 2950 2966  
359 3 2988 2983  
360 3 2985 2984  
361 1 2993 3009  
362 1 2994 3008  
363 1 2995 3014  
364 1 2996 3012  
365 1 3033 3049  
366 1 3034 3048  
367 1 3035 3054  
368 2 3036 3052  
369 3 3152 3041  
370 2 3073 3089  
371 1 3074 3088  
372 1 3075 3094  
373 1 3076 3092  
374 3 3153 3086  
375 1 3113 3129  
376 1 3114 3128  
377 1 3115 3134  
378 1 3116 3132  
379 3 3154 3149  
380 3 3151 3150  
381 1 3159 3175  
382 1 3160 3174  
383 1 3161 3180  
384 1 3162 3178  
385 1 3199 3215  
386 1 3200 3214  
387 1 3201 3220  
388 2 3202 3218  
389 3 3318 3207  
390 2 3239 3255  
391 1 3240 3254  
392 1 3241 3260  
393 1 3242 3258  
394 3 3319 3252  
395 1 3279 3295  
396 1 3280 3294  
397 1 3281 3300  
398 1 3282 3298  
399 3 3320 3315  
400 3 3317 3316  
401 1 3325 3341  
402 1 3326 3340  
403 1 3327 3346  
404 1 3328 3344  
405 1 3365 3381  
406 1 3366 3380  
407 1 3367 3386  
408 2 3368 3384  
409 3 3484 3373  
410 2 3405 3421  
411 1 3406 3420  
412 1 3407 3426  
413 1 3408 3424  
414 3 3485 3418  
415 1 3445 3461  
416 1 3446 3460  
417 1 3447 3466  
418 1 3448 3464  
419 3 3486 3481  
420 3 3483 3482  
421 1 3491 3507  
422 1 3492 3506  
423 1 3493 3512  
424 1 3494 3510  
425 1 3531 3547  
426 1 3532 3546  
427 1 3533 3552  
428 2 3534 3550  
429 3 3650 3539

430 2 3571 3587  
 431 1 3572 3586  
 432 1 3573 3592  
 433 1 3574 3590  
 434 3 3651 3584  
 435 1 3611 3627  
 436 1 3612 3626  
 437 1 3613 3632  
 438 1 3614 3630  
 439 3 3652 3647  
 440 3 3649 3648  
 441 1 3657 3673  
 442 1 3658 3672  
 443 1 3659 3678  
 444 1 3660 3676  
 445 1 3697 3713  
 446 1 3698 3712  
 447 1 3699 3718  
 448 2 3700 3716  
 449 3 3816 3705  
 450 2 3737 3753  
 451 1 3738 3752  
 452 1 3739 3758  
 453 1 3740 3756  
 454 3 3817 3750  
 455 1 3777 3793  
 456 1 3778 3792  
 457 1 3779 3798  
 458 1 3780 3796  
 459 3 3818 3813  
 460 3 3815 3814  
 461 1 3823 3839  
 462 1 3824 3838  
 463 1 3825 3844  
 464 1 3826 3842  
 465 1 3863 3879  
 466 1 3864 3878  
 467 1 3865 3884  
 468 2 3866 3882  
 469 3 3982 3871  
 470 2 3903 3919  
 471 1 3904 3918  
 472 1 3905 3924  
 473 1 3906 3922  
 474 3 3983 3916  
 475 1 3943 3959  
 476 1 3944 3958  
 477 1 3945 3964  
 478 1 3946 3962  
 479 3 3984 3979  
 480 3 3981 3980

Angles

1 1 1 20 6  
 2 1 3 20 6  
 3 1 2 21 5  
 4 1 4 21 5  
 5 1 1 24 8  
 6 1 3 24 8  
 7 1 4 26 7  
 8 1 2 26 7  
 9 2 164 53 115  
 10 1 41 60 46  
 11 1 43 60 46  
 12 1 42 61 45  
 13 1 44 61 45  
 14 3 41 64 48  
 15 3 43 64 48  
 16 1 44 66 47  
 17 1 42 66 47  
 18 2 165 98 118  
 19 1 81 100 86  
 20 1 83 100 86  
 21 3 82 101 85  
 22 3 84 101 85  
 23 1 81 104 88  
 24 1 83 104 88  
 25 1 84 106 87  
 26 1 82 106 87  
 27 1 121 140 126  
 28 1 123 140 126  
 29 1 122 141 125  
 30 1 124 141 125  
 31 1 121 144 128  
 32 1 123 144 128  
 33 1 124 146 127  
 34 1 122 146 127  
 35 2 166 161 77  
 36 2 163 162 113  
 37 1 167 186 172  
 38 1 169 186 172  
 39 1 168 187 171

|     |   |     |     |     |
|-----|---|-----|-----|-----|
| 40  | 1 | 170 | 187 | 171 |
| 41  | 1 | 167 | 190 | 174 |
| 42  | 1 | 169 | 190 | 174 |
| 43  | 1 | 170 | 192 | 173 |
| 44  | 1 | 168 | 192 | 173 |
| 45  | 2 | 330 | 219 | 281 |
| 46  | 1 | 207 | 226 | 212 |
| 47  | 1 | 209 | 226 | 212 |
| 48  | 1 | 208 | 227 | 211 |
| 49  | 1 | 210 | 227 | 211 |
| 50  | 3 | 207 | 230 | 214 |
| 51  | 3 | 209 | 230 | 214 |
| 52  | 1 | 210 | 232 | 213 |
| 53  | 1 | 208 | 232 | 213 |
| 54  | 2 | 331 | 264 | 284 |
| 55  | 1 | 247 | 266 | 252 |
| 56  | 1 | 249 | 266 | 252 |
| 57  | 3 | 248 | 267 | 251 |
| 58  | 3 | 250 | 267 | 251 |
| 59  | 1 | 247 | 270 | 254 |
| 60  | 1 | 249 | 270 | 254 |
| 61  | 1 | 250 | 272 | 253 |
| 62  | 1 | 248 | 272 | 253 |
| 63  | 1 | 287 | 306 | 292 |
| 64  | 1 | 289 | 306 | 292 |
| 65  | 1 | 288 | 307 | 291 |
| 66  | 1 | 290 | 307 | 291 |
| 67  | 1 | 287 | 310 | 294 |
| 68  | 1 | 289 | 310 | 294 |
| 69  | 1 | 290 | 312 | 293 |
| 70  | 1 | 288 | 312 | 293 |
| 71  | 2 | 332 | 327 | 243 |
| 72  | 2 | 329 | 328 | 279 |
| 73  | 1 | 333 | 352 | 338 |
| 74  | 1 | 335 | 352 | 338 |
| 75  | 1 | 334 | 353 | 337 |
| 76  | 1 | 336 | 353 | 337 |
| 77  | 1 | 333 | 356 | 340 |
| 78  | 1 | 335 | 356 | 340 |
| 79  | 1 | 336 | 358 | 339 |
| 80  | 1 | 334 | 358 | 339 |
| 81  | 2 | 496 | 385 | 447 |
| 82  | 1 | 373 | 392 | 378 |
| 83  | 1 | 375 | 392 | 378 |
| 84  | 1 | 374 | 393 | 377 |
| 85  | 1 | 376 | 393 | 377 |
| 86  | 3 | 373 | 396 | 380 |
| 87  | 3 | 375 | 396 | 380 |
| 88  | 1 | 376 | 398 | 379 |
| 89  | 1 | 374 | 398 | 379 |
| 90  | 2 | 497 | 430 | 450 |
| 91  | 1 | 413 | 432 | 418 |
| 92  | 1 | 415 | 432 | 418 |
| 93  | 3 | 414 | 433 | 417 |
| 94  | 3 | 416 | 433 | 417 |
| 95  | 1 | 413 | 436 | 420 |
| 96  | 1 | 415 | 436 | 420 |
| 97  | 1 | 416 | 438 | 419 |
| 98  | 1 | 414 | 438 | 419 |
| 99  | 1 | 453 | 472 | 458 |
| 100 | 1 | 455 | 472 | 458 |
| 101 | 1 | 454 | 473 | 457 |
| 102 | 1 | 456 | 473 | 457 |
| 103 | 1 | 453 | 476 | 460 |
| 104 | 1 | 455 | 476 | 460 |
| 105 | 1 | 456 | 478 | 459 |
| 106 | 1 | 454 | 478 | 459 |
| 107 | 2 | 498 | 493 | 409 |
| 108 | 2 | 495 | 494 | 445 |
| 109 | 1 | 499 | 518 | 504 |
| 110 | 1 | 501 | 518 | 504 |
| 111 | 1 | 500 | 519 | 503 |
| 112 | 1 | 502 | 519 | 503 |
| 113 | 1 | 499 | 522 | 506 |
| 114 | 1 | 501 | 522 | 506 |
| 115 | 1 | 502 | 524 | 505 |
| 116 | 1 | 500 | 524 | 505 |
| 117 | 2 | 662 | 551 | 613 |
| 118 | 1 | 539 | 558 | 544 |
| 119 | 1 | 541 | 558 | 544 |
| 120 | 1 | 540 | 559 | 543 |
| 121 | 1 | 542 | 559 | 543 |
| 122 | 3 | 539 | 562 | 546 |
| 123 | 3 | 541 | 562 | 546 |
| 124 | 1 | 542 | 564 | 545 |
| 125 | 1 | 540 | 564 | 545 |
| 126 | 2 | 663 | 596 | 616 |
| 127 | 1 | 579 | 598 | 584 |
| 128 | 1 | 581 | 598 | 584 |
| 129 | 3 | 580 | 599 | 583 |
| 130 | 3 | 582 | 599 | 583 |
| 131 | 1 | 579 | 602 | 586 |
| 132 | 1 | 581 | 602 | 586 |

|     |   |      |      |      |
|-----|---|------|------|------|
| 133 | 1 | 582  | 604  | 585  |
| 134 | 1 | 580  | 604  | 585  |
| 135 | 1 | 619  | 638  | 624  |
| 136 | 1 | 621  | 638  | 624  |
| 137 | 1 | 620  | 639  | 623  |
| 138 | 1 | 622  | 639  | 623  |
| 139 | 1 | 619  | 642  | 626  |
| 140 | 1 | 621  | 642  | 626  |
| 141 | 1 | 622  | 644  | 625  |
| 142 | 1 | 620  | 644  | 625  |
| 143 | 2 | 664  | 659  | 575  |
| 144 | 2 | 661  | 660  | 611  |
| 145 | 1 | 665  | 684  | 670  |
| 146 | 1 | 667  | 684  | 670  |
| 147 | 1 | 666  | 685  | 669  |
| 148 | 1 | 668  | 685  | 669  |
| 149 | 1 | 665  | 688  | 672  |
| 150 | 1 | 667  | 688  | 672  |
| 151 | 1 | 668  | 690  | 671  |
| 152 | 1 | 666  | 690  | 671  |
| 153 | 2 | 828  | 717  | 779  |
| 154 | 1 | 705  | 724  | 710  |
| 155 | 1 | 707  | 724  | 710  |
| 156 | 1 | 706  | 725  | 709  |
| 157 | 1 | 708  | 725  | 709  |
| 158 | 3 | 705  | 728  | 712  |
| 159 | 3 | 707  | 728  | 712  |
| 160 | 1 | 708  | 730  | 711  |
| 161 | 1 | 706  | 730  | 711  |
| 162 | 2 | 829  | 762  | 782  |
| 163 | 1 | 745  | 764  | 750  |
| 164 | 1 | 747  | 764  | 750  |
| 165 | 3 | 746  | 765  | 749  |
| 166 | 3 | 748  | 765  | 749  |
| 167 | 1 | 745  | 768  | 752  |
| 168 | 1 | 747  | 768  | 752  |
| 169 | 1 | 748  | 770  | 751  |
| 170 | 1 | 746  | 770  | 751  |
| 171 | 1 | 785  | 804  | 790  |
| 172 | 1 | 787  | 804  | 790  |
| 173 | 1 | 786  | 805  | 789  |
| 174 | 1 | 788  | 805  | 789  |
| 175 | 1 | 785  | 808  | 792  |
| 176 | 1 | 787  | 808  | 792  |
| 177 | 1 | 788  | 810  | 791  |
| 178 | 1 | 786  | 810  | 791  |
| 179 | 2 | 830  | 825  | 741  |
| 180 | 2 | 827  | 826  | 777  |
| 181 | 1 | 831  | 850  | 836  |
| 182 | 1 | 833  | 850  | 836  |
| 183 | 1 | 832  | 851  | 835  |
| 184 | 1 | 834  | 851  | 835  |
| 185 | 1 | 831  | 854  | 838  |
| 186 | 1 | 833  | 854  | 838  |
| 187 | 1 | 834  | 856  | 837  |
| 188 | 1 | 832  | 856  | 837  |
| 189 | 2 | 994  | 883  | 945  |
| 190 | 1 | 871  | 890  | 876  |
| 191 | 1 | 873  | 890  | 876  |
| 192 | 1 | 872  | 891  | 875  |
| 193 | 1 | 874  | 891  | 875  |
| 194 | 3 | 871  | 894  | 878  |
| 195 | 3 | 873  | 894  | 878  |
| 196 | 1 | 874  | 896  | 877  |
| 197 | 1 | 872  | 896  | 877  |
| 198 | 2 | 995  | 928  | 948  |
| 199 | 1 | 911  | 930  | 916  |
| 200 | 1 | 913  | 930  | 916  |
| 201 | 3 | 912  | 931  | 915  |
| 202 | 3 | 914  | 931  | 915  |
| 203 | 1 | 911  | 934  | 918  |
| 204 | 1 | 913  | 934  | 918  |
| 205 | 1 | 914  | 936  | 917  |
| 206 | 1 | 912  | 936  | 917  |
| 207 | 1 | 951  | 970  | 956  |
| 208 | 1 | 953  | 970  | 956  |
| 209 | 1 | 952  | 971  | 955  |
| 210 | 1 | 954  | 971  | 955  |
| 211 | 1 | 951  | 974  | 958  |
| 212 | 1 | 953  | 974  | 958  |
| 213 | 1 | 954  | 976  | 957  |
| 214 | 1 | 952  | 976  | 957  |
| 215 | 2 | 996  | 991  | 907  |
| 216 | 2 | 993  | 992  | 943  |
| 217 | 1 | 997  | 1016 | 1002 |
| 218 | 1 | 999  | 1016 | 1002 |
| 219 | 1 | 998  | 1017 | 1001 |
| 220 | 1 | 1000 | 1017 | 1001 |
| 221 | 1 | 997  | 1020 | 1004 |
| 222 | 1 | 999  | 1020 | 1004 |
| 223 | 1 | 1000 | 1022 | 1003 |
| 224 | 1 | 998  | 1022 | 1003 |
| 225 | 2 | 1160 | 1049 | 1111 |

|     |   |      |      |      |
|-----|---|------|------|------|
| 226 | 1 | 1037 | 1056 | 1042 |
| 227 | 1 | 1039 | 1056 | 1042 |
| 228 | 1 | 1038 | 1057 | 1041 |
| 229 | 1 | 1040 | 1057 | 1041 |
| 230 | 3 | 1037 | 1060 | 1044 |
| 231 | 3 | 1039 | 1060 | 1044 |
| 232 | 1 | 1040 | 1062 | 1043 |
| 233 | 1 | 1038 | 1062 | 1043 |
| 234 | 2 | 1161 | 1094 | 1114 |
| 235 | 1 | 1077 | 1096 | 1082 |
| 236 | 1 | 1079 | 1096 | 1082 |
| 237 | 3 | 1078 | 1097 | 1081 |
| 238 | 3 | 1080 | 1097 | 1081 |
| 239 | 1 | 1077 | 1100 | 1084 |
| 240 | 1 | 1079 | 1100 | 1084 |
| 241 | 1 | 1080 | 1102 | 1083 |
| 242 | 1 | 1078 | 1102 | 1083 |
| 243 | 1 | 1117 | 1136 | 1122 |
| 244 | 1 | 1119 | 1136 | 1122 |
| 245 | 1 | 1118 | 1137 | 1121 |
| 246 | 1 | 1120 | 1137 | 1121 |
| 247 | 1 | 1117 | 1140 | 1124 |
| 248 | 1 | 1119 | 1140 | 1124 |
| 249 | 1 | 1120 | 1142 | 1123 |
| 250 | 1 | 1118 | 1142 | 1123 |
| 251 | 2 | 1162 | 1157 | 1073 |
| 252 | 2 | 1159 | 1158 | 1109 |
| 253 | 1 | 1163 | 1182 | 1168 |
| 254 | 1 | 1165 | 1182 | 1168 |
| 255 | 1 | 1164 | 1183 | 1167 |
| 256 | 1 | 1166 | 1183 | 1167 |
| 257 | 1 | 1163 | 1186 | 1170 |
| 258 | 1 | 1165 | 1186 | 1170 |
| 259 | 1 | 1166 | 1188 | 1169 |
| 260 | 1 | 1164 | 1188 | 1169 |
| 261 | 2 | 1326 | 1215 | 1277 |
| 262 | 1 | 1203 | 1222 | 1208 |
| 263 | 1 | 1205 | 1222 | 1208 |
| 264 | 1 | 1204 | 1223 | 1207 |
| 265 | 1 | 1206 | 1223 | 1207 |
| 266 | 3 | 1203 | 1226 | 1210 |
| 267 | 3 | 1205 | 1226 | 1210 |
| 268 | 1 | 1206 | 1228 | 1209 |
| 269 | 1 | 1204 | 1228 | 1209 |
| 270 | 2 | 1327 | 1260 | 1280 |
| 271 | 1 | 1243 | 1262 | 1248 |
| 272 | 1 | 1245 | 1262 | 1248 |
| 273 | 3 | 1244 | 1263 | 1247 |
| 274 | 3 | 1246 | 1263 | 1247 |
| 275 | 1 | 1243 | 1266 | 1250 |
| 276 | 1 | 1245 | 1266 | 1250 |
| 277 | 1 | 1246 | 1268 | 1249 |
| 278 | 1 | 1244 | 1268 | 1249 |
| 279 | 1 | 1283 | 1302 | 1288 |
| 280 | 1 | 1285 | 1302 | 1288 |
| 281 | 1 | 1284 | 1303 | 1287 |
| 282 | 1 | 1286 | 1303 | 1287 |
| 283 | 1 | 1283 | 1306 | 1290 |
| 284 | 1 | 1285 | 1306 | 1290 |
| 285 | 1 | 1286 | 1308 | 1289 |
| 286 | 1 | 1284 | 1308 | 1289 |
| 287 | 2 | 1328 | 1323 | 1239 |
| 288 | 2 | 1325 | 1324 | 1275 |
| 289 | 1 | 1329 | 1348 | 1334 |
| 290 | 1 | 1331 | 1348 | 1334 |
| 291 | 1 | 1330 | 1349 | 1333 |
| 292 | 1 | 1332 | 1349 | 1333 |
| 293 | 1 | 1329 | 1352 | 1336 |
| 294 | 1 | 1331 | 1352 | 1336 |
| 295 | 1 | 1332 | 1354 | 1335 |
| 296 | 1 | 1330 | 1354 | 1335 |
| 297 | 2 | 1492 | 1381 | 1443 |
| 298 | 1 | 1369 | 1388 | 1374 |
| 299 | 1 | 1371 | 1388 | 1374 |
| 300 | 1 | 1370 | 1389 | 1373 |
| 301 | 1 | 1372 | 1389 | 1373 |
| 302 | 3 | 1369 | 1392 | 1376 |
| 303 | 3 | 1371 | 1392 | 1376 |
| 304 | 1 | 1372 | 1394 | 1375 |
| 305 | 1 | 1370 | 1394 | 1375 |
| 306 | 2 | 1493 | 1426 | 1446 |
| 307 | 1 | 1409 | 1428 | 1414 |
| 308 | 1 | 1411 | 1428 | 1414 |
| 309 | 3 | 1410 | 1429 | 1413 |
| 310 | 3 | 1412 | 1429 | 1413 |
| 311 | 1 | 1409 | 1432 | 1416 |
| 312 | 1 | 1411 | 1432 | 1416 |
| 313 | 1 | 1412 | 1434 | 1415 |
| 314 | 1 | 1410 | 1434 | 1415 |
| 315 | 1 | 1449 | 1468 | 1454 |
| 316 | 1 | 1451 | 1468 | 1454 |
| 317 | 1 | 1450 | 1469 | 1453 |
| 318 | 1 | 1452 | 1469 | 1453 |

319 1 1449 1472 1456  
320 1 1451 1472 1456  
321 1 1452 1474 1455  
322 1 1450 1474 1455  
323 2 1494 1489 1405  
324 2 1491 1490 1441  
325 1 1495 1514 1500  
326 1 1497 1514 1500  
327 1 1496 1515 1499  
328 1 1498 1515 1499  
329 1 1495 1518 1502  
330 1 1497 1518 1502  
331 1 1498 1520 1501  
332 1 1496 1520 1501  
333 2 1658 1547 1609  
334 1 1535 1554 1540  
335 1 1537 1554 1540  
336 1 1536 1555 1539  
337 1 1538 1555 1539  
338 3 1535 1558 1542  
339 3 1537 1558 1542  
340 1 1538 1560 1541  
341 1 1536 1560 1541  
342 2 1659 1592 1612  
343 1 1575 1594 1580  
344 1 1577 1594 1580  
345 3 1576 1595 1579  
346 3 1578 1595 1579  
347 1 1575 1598 1582  
348 1 1577 1598 1582  
349 1 1578 1600 1581  
350 1 1576 1600 1581  
351 1 1615 1634 1620  
352 1 1617 1634 1620  
353 1 1616 1635 1619  
354 1 1618 1635 1619  
355 1 1615 1638 1622  
356 1 1617 1638 1622  
357 1 1618 1640 1621  
358 1 1616 1640 1621  
359 2 1660 1655 1571  
360 2 1657 1656 1607  
361 1 1661 1680 1666  
362 1 1663 1680 1666  
363 1 1662 1681 1665  
364 1 1664 1681 1665  
365 1 1661 1684 1668  
366 1 1663 1684 1668  
367 1 1664 1686 1667  
368 1 1662 1686 1667  
369 2 1824 1713 1775  
370 1 1701 1720 1706  
371 1 1703 1720 1706  
372 1 1702 1721 1705  
373 1 1704 1721 1705  
374 3 1701 1724 1708  
375 3 1703 1724 1708  
376 1 1704 1726 1707  
377 1 1702 1726 1707  
378 2 1825 1758 1778  
379 1 1741 1760 1746  
380 1 1743 1760 1746  
381 3 1742 1761 1745  
382 3 1744 1761 1745  
383 1 1741 1764 1748  
384 1 1743 1764 1748  
385 1 1744 1766 1747  
386 1 1742 1766 1747  
387 1 1781 1800 1786  
388 1 1783 1800 1786  
389 1 1782 1801 1785  
390 1 1784 1801 1785  
391 1 1781 1804 1788  
392 1 1783 1804 1788  
393 1 1784 1806 1787  
394 1 1782 1806 1787  
395 2 1826 1821 1737  
396 2 1823 1822 1773  
397 1 1827 1846 1832  
398 1 1829 1846 1832  
399 1 1828 1847 1831  
400 1 1830 1847 1831  
401 1 1827 1850 1834  
402 1 1829 1850 1834  
403 1 1830 1852 1833  
404 1 1828 1852 1833  
405 2 1990 1879 1941  
406 1 1867 1886 1872  
407 1 1869 1886 1872  
408 1 1868 1887 1871  
409 1 1870 1887 1871  
410 3 1867 1890 1874  
411 3 1869 1890 1874



412 1 1870 1892 1873  
413 1 1868 1892 1873  
414 2 1991 1924 1944  
415 1 1907 1926 1912  
416 1 1909 1926 1912  
417 3 1908 1927 1911  
418 3 1910 1927 1911  
419 1 1907 1930 1914  
420 1 1909 1930 1914  
421 1 1910 1932 1913  
422 1 1908 1932 1913  
423 1 1947 1966 1952  
424 1 1949 1966 1952  
425 1 1948 1967 1951  
426 1 1950 1967 1951  
427 1 1947 1970 1954  
428 1 1949 1970 1954  
429 1 1950 1972 1953  
430 1 1948 1972 1953  
431 2 1992 1987 1903  
432 2 1989 1988 1939  
433 1 1993 2012 1998  
434 1 1995 2012 1998  
435 1 1994 2013 1997  
436 1 1996 2013 1997  
437 1 1993 2016 2000  
438 1 1995 2016 2000  
439 1 1996 2018 1999  
440 1 1994 2018 1999  
441 2 2156 2045 2107  
442 1 2033 2052 2038  
443 1 2035 2052 2038  
444 1 2034 2053 2037  
445 1 2036 2053 2037  
446 3 2033 2056 2040  
447 3 2035 2056 2040  
448 1 2036 2058 2039  
449 1 2034 2058 2039  
450 2 2157 2090 2110  
451 1 2073 2092 2078  
452 1 2075 2092 2078  
453 3 2074 2093 2077  
454 3 2076 2093 2077  
455 1 2073 2096 2080  
456 1 2075 2096 2080  
457 1 2076 2098 2079  
458 1 2074 2098 2079  
459 1 2113 2132 2118  
460 1 2115 2132 2118  
461 1 2114 2133 2117  
462 1 2116 2133 2117  
463 1 2113 2136 2120  
464 1 2115 2136 2120  
465 1 2116 2138 2119  
466 1 2114 2138 2119  
467 2 2158 2153 2069  
468 2 2155 2154 2105  
469 1 2159 2178 2164  
470 1 2161 2178 2164  
471 1 2160 2179 2163  
472 1 2162 2179 2163  
473 1 2159 2182 2166  
474 1 2161 2182 2166  
475 1 2162 2184 2165  
476 1 2160 2184 2165  
477 2 2322 2211 2273  
478 1 2199 2218 2204  
479 1 2201 2218 2204  
480 1 2200 2219 2203  
481 1 2202 2219 2203  
482 3 2199 2222 2206  
483 3 2201 2222 2206  
484 1 2202 2224 2205  
485 1 2200 2224 2205  
486 2 2323 2256 2276  
487 1 2239 2258 2244  
488 1 2241 2258 2244  
489 3 2240 2259 2243  
490 3 2242 2259 2243  
491 1 2239 2262 2246  
492 1 2241 2262 2246  
493 1 2242 2264 2245  
494 1 2240 2264 2245  
495 1 2279 2298 2284  
496 1 2281 2298 2284  
497 1 2280 2299 2283  
498 1 2282 2299 2283  
499 1 2279 2302 2286  
500 1 2281 2302 2286  
501 1 2282 2304 2285  
502 1 2280 2304 2285  
503 2 2324 2319 2235  
504 2 2321 2320 2271

505 1 2325 2344 2330  
506 1 2327 2344 2330  
507 1 2326 2345 2329  
508 1 2328 2345 2329  
509 1 2325 2348 2332  
510 1 2327 2348 2332  
511 1 2328 2350 2331  
512 1 2326 2350 2331  
513 2 2488 2377 2439  
514 1 2365 2384 2370  
515 1 2367 2384 2370  
516 1 2366 2385 2369  
517 1 2368 2385 2369  
518 3 2365 2388 2372  
519 3 2367 2388 2372  
520 1 2368 2390 2371  
521 1 2366 2390 2371  
522 2 2489 2422 2442  
523 1 2405 2424 2410  
524 1 2407 2424 2410  
525 3 2406 2425 2409  
526 3 2408 2425 2409  
527 1 2405 2428 2412  
528 1 2407 2428 2412  
529 1 2408 2430 2411  
530 1 2406 2430 2411  
531 1 2445 2464 2450  
532 1 2447 2464 2450  
533 1 2446 2465 2449  
534 1 2448 2465 2449  
535 1 2445 2468 2452  
536 1 2447 2468 2452  
537 1 2448 2470 2451  
538 1 2446 2470 2451  
539 2 2490 2485 2401  
540 2 2487 2486 2437  
541 1 2491 2510 2496  
542 1 2493 2510 2496  
543 1 2492 2511 2495  
544 1 2494 2511 2495  
545 1 2491 2514 2498  
546 1 2493 2514 2498  
547 1 2494 2516 2497  
548 1 2492 2516 2497  
549 2 2654 2543 2605  
550 1 2531 2550 2536  
551 1 2533 2550 2536  
552 1 2532 2551 2535  
553 1 2534 2551 2535  
554 3 2531 2554 2538  
555 3 2533 2554 2538  
556 1 2534 2556 2537  
557 1 2532 2556 2537  
558 2 2655 2588 2608  
559 1 2571 2590 2576  
560 1 2573 2590 2576  
561 3 2572 2591 2575  
562 3 2574 2591 2575  
563 1 2571 2594 2578  
564 1 2573 2594 2578  
565 1 2574 2596 2577  
566 1 2572 2596 2577  
567 1 2611 2630 2616  
568 1 2613 2630 2616  
569 1 2612 2631 2615  
570 1 2614 2631 2615  
571 1 2611 2634 2618  
572 1 2613 2634 2618  
573 1 2614 2636 2617  
574 1 2612 2636 2617  
575 2 2656 2651 2567  
576 2 2653 2652 2603  
577 1 2657 2676 2662  
578 1 2659 2676 2662  
579 1 2658 2677 2661  
580 1 2660 2677 2661  
581 1 2657 2680 2664  
582 1 2659 2680 2664  
583 1 2660 2682 2663  
584 1 2658 2682 2663  
585 2 2820 2709 2771  
586 1 2697 2716 2702  
587 1 2699 2716 2702  
588 1 2698 2717 2701  
589 1 2700 2717 2701  
590 3 2697 2720 2704  
591 3 2699 2720 2704  
592 1 2700 2722 2703  
593 1 2698 2722 2703  
594 2 2821 2754 2774  
595 1 2737 2756 2742  
596 1 2739 2756 2742  
597 3 2738 2757 2741

|     |   |      |      |      |
|-----|---|------|------|------|
| 598 | 3 | 2740 | 2757 | 2741 |
| 599 | 1 | 2737 | 2760 | 2744 |
| 600 | 1 | 2739 | 2760 | 2744 |
| 601 | 1 | 2740 | 2762 | 2743 |
| 602 | 1 | 2738 | 2762 | 2743 |
| 603 | 1 | 2777 | 2796 | 2782 |
| 604 | 1 | 2779 | 2796 | 2782 |
| 605 | 1 | 2778 | 2797 | 2781 |
| 606 | 1 | 2780 | 2797 | 2781 |
| 607 | 1 | 2777 | 2800 | 2784 |
| 608 | 1 | 2779 | 2800 | 2784 |
| 609 | 1 | 2780 | 2802 | 2783 |
| 610 | 1 | 2778 | 2802 | 2783 |
| 611 | 2 | 2822 | 2817 | 2733 |
| 612 | 2 | 2819 | 2818 | 2769 |
| 613 | 1 | 2823 | 2842 | 2828 |
| 614 | 1 | 2825 | 2842 | 2828 |
| 615 | 1 | 2824 | 2843 | 2827 |
| 616 | 1 | 2826 | 2843 | 2827 |
| 617 | 1 | 2823 | 2846 | 2830 |
| 618 | 1 | 2825 | 2846 | 2830 |
| 619 | 1 | 2826 | 2848 | 2829 |
| 620 | 1 | 2824 | 2848 | 2829 |
| 621 | 2 | 2986 | 2875 | 2937 |
| 622 | 1 | 2863 | 2882 | 2868 |
| 623 | 1 | 2865 | 2882 | 2868 |
| 624 | 1 | 2864 | 2883 | 2867 |
| 625 | 1 | 2866 | 2883 | 2867 |
| 626 | 3 | 2863 | 2886 | 2870 |
| 627 | 3 | 2865 | 2886 | 2870 |
| 628 | 1 | 2866 | 2888 | 2869 |
| 629 | 1 | 2864 | 2888 | 2869 |
| 630 | 2 | 2987 | 2920 | 2940 |
| 631 | 1 | 2903 | 2922 | 2908 |
| 632 | 1 | 2905 | 2922 | 2908 |
| 633 | 3 | 2904 | 2923 | 2907 |
| 634 | 3 | 2906 | 2923 | 2907 |
| 635 | 1 | 2903 | 2926 | 2910 |
| 636 | 1 | 2905 | 2926 | 2910 |
| 637 | 1 | 2906 | 2928 | 2909 |
| 638 | 1 | 2904 | 2928 | 2909 |
| 639 | 1 | 2943 | 2962 | 2948 |
| 640 | 1 | 2945 | 2962 | 2948 |
| 641 | 1 | 2944 | 2963 | 2947 |
| 642 | 1 | 2946 | 2963 | 2947 |
| 643 | 1 | 2943 | 2966 | 2950 |
| 644 | 1 | 2945 | 2966 | 2950 |
| 645 | 1 | 2946 | 2968 | 2949 |
| 646 | 1 | 2944 | 2968 | 2949 |
| 647 | 2 | 2988 | 2983 | 2899 |
| 648 | 2 | 2985 | 2984 | 2935 |
| 649 | 1 | 2989 | 3008 | 2994 |
| 650 | 1 | 2991 | 3008 | 2994 |
| 651 | 1 | 2990 | 3009 | 2993 |
| 652 | 1 | 2992 | 3009 | 2993 |
| 653 | 1 | 2989 | 3012 | 2996 |
| 654 | 1 | 2991 | 3012 | 2996 |
| 655 | 1 | 2992 | 3014 | 2995 |
| 656 | 1 | 2990 | 3014 | 2995 |
| 657 | 2 | 3152 | 3041 | 3103 |
| 658 | 1 | 3029 | 3048 | 3034 |
| 659 | 1 | 3031 | 3048 | 3034 |
| 660 | 1 | 3030 | 3049 | 3033 |
| 661 | 1 | 3032 | 3049 | 3033 |
| 662 | 3 | 3029 | 3052 | 3036 |
| 663 | 3 | 3031 | 3052 | 3036 |
| 664 | 1 | 3032 | 3054 | 3035 |
| 665 | 1 | 3030 | 3054 | 3035 |
| 666 | 2 | 3153 | 3086 | 3106 |
| 667 | 1 | 3069 | 3088 | 3074 |
| 668 | 1 | 3071 | 3088 | 3074 |
| 669 | 3 | 3070 | 3089 | 3073 |
| 670 | 3 | 3072 | 3089 | 3073 |
| 671 | 1 | 3069 | 3092 | 3076 |
| 672 | 1 | 3071 | 3092 | 3076 |
| 673 | 1 | 3072 | 3094 | 3075 |
| 674 | 1 | 3070 | 3094 | 3075 |
| 675 | 1 | 3109 | 3128 | 3114 |
| 676 | 1 | 3111 | 3128 | 3114 |
| 677 | 1 | 3110 | 3129 | 3113 |
| 678 | 1 | 3112 | 3129 | 3113 |
| 679 | 1 | 3109 | 3132 | 3116 |
| 680 | 1 | 3111 | 3132 | 3116 |
| 681 | 1 | 3112 | 3134 | 3115 |
| 682 | 1 | 3110 | 3134 | 3115 |
| 683 | 2 | 3154 | 3149 | 3065 |
| 684 | 2 | 3151 | 3150 | 3101 |
| 685 | 1 | 3155 | 3174 | 3160 |
| 686 | 1 | 3157 | 3174 | 3160 |
| 687 | 1 | 3156 | 3175 | 3159 |
| 688 | 1 | 3158 | 3175 | 3159 |
| 689 | 1 | 3155 | 3178 | 3162 |
| 690 | 1 | 3157 | 3178 | 3162 |

691 1 3158 3180 3161  
692 1 3156 3180 3161  
693 2 3318 3207 3269  
694 1 3195 3214 3200  
695 1 3197 3214 3200  
696 1 3196 3215 3199  
697 1 3198 3215 3199  
698 3 3195 3218 3202  
699 3 3197 3218 3202  
700 1 3198 3220 3201  
701 1 3196 3220 3201  
702 2 3319 3252 3272  
703 1 3235 3254 3240  
704 1 3237 3254 3240  
705 3 3236 3255 3239  
706 3 3238 3255 3239  
707 1 3235 3258 3242  
708 1 3237 3258 3242  
709 1 3238 3260 3241  
710 1 3236 3260 3241  
711 1 3275 3294 3280  
712 1 3277 3294 3280  
713 1 3276 3295 3279  
714 1 3278 3295 3279  
715 1 3275 3298 3282  
716 1 3277 3298 3282  
717 1 3278 3300 3281  
718 1 3276 3300 3281  
719 2 3320 3315 3231  
720 2 3317 3316 3267  
721 1 3321 3340 3326  
722 1 3323 3340 3326  
723 1 3322 3341 3325  
724 1 3324 3341 3325  
725 1 3321 3344 3328  
726 1 3323 3344 3328  
727 1 3324 3346 3327  
728 1 3322 3346 3327  
729 2 3484 3373 3435  
730 1 3361 3380 3366  
731 1 3363 3380 3366  
732 1 3362 3381 3365  
733 1 3364 3381 3365  
734 3 3361 3384 3368  
735 3 3363 3384 3368  
736 1 3364 3386 3367  
737 1 3362 3386 3367  
738 2 3485 3418 3438  
739 1 3401 3420 3406  
740 1 3403 3420 3406  
741 3 3402 3421 3405  
742 3 3404 3421 3405  
743 1 3401 3424 3408  
744 1 3403 3424 3408  
745 1 3404 3426 3407  
746 1 3402 3426 3407  
747 1 3441 3460 3446  
748 1 3443 3460 3446  
749 1 3442 3461 3445  
750 1 3444 3461 3445  
751 1 3441 3464 3448  
752 1 3443 3464 3448  
753 1 3444 3466 3447  
754 1 3442 3466 3447  
755 2 3486 3481 3397  
756 2 3483 3482 3433  
757 1 3487 3506 3492  
758 1 3489 3506 3492  
759 1 3488 3507 3491  
760 1 3490 3507 3491  
761 1 3487 3510 3494  
762 1 3489 3510 3494  
763 1 3490 3512 3493  
764 1 3488 3512 3493  
765 2 3650 3539 3601  
766 1 3527 3546 3532  
767 1 3529 3546 3532  
768 1 3528 3547 3531  
769 1 3530 3547 3531  
770 3 3527 3550 3534  
771 3 3529 3550 3534  
772 1 3530 3552 3533  
773 1 3528 3552 3533  
774 2 3651 3584 3604  
775 1 3567 3586 3572  
776 1 3569 3586 3572  
777 3 3568 3587 3571  
778 3 3570 3587 3571  
779 1 3567 3590 3574  
780 1 3569 3590 3574  
781 1 3570 3592 3573  
782 1 3568 3592 3573  
783 1 3607 3626 3612

```

784 1 3609 3626 3612
785 1 3608 3627 3611
786 1 3610 3627 3611
787 1 3607 3630 3614
788 1 3609 3630 3614
789 1 3610 3632 3613
790 1 3608 3632 3613
791 2 3652 3647 3563
792 2 3649 3648 3599
793 1 3653 3672 3658
794 1 3655 3672 3658
795 1 3654 3673 3657
796 1 3656 3673 3657
797 1 3653 3676 3660
798 1 3655 3676 3660
799 1 3656 3678 3659
800 1 3654 3678 3659
801 2 3816 3705 3767
802 1 3693 3712 3698
803 1 3695 3712 3698
804 1 3694 3713 3697
805 1 3696 3713 3697
806 3 3693 3716 3700
807 3 3695 3716 3700
808 1 3696 3718 3699
809 1 3694 3718 3699
810 2 3817 3750 3770
811 1 3733 3752 3738
812 1 3735 3752 3738
813 3 3734 3753 3737
814 3 3736 3753 3737
815 1 3733 3756 3740
816 1 3735 3756 3740
817 1 3736 3758 3739
818 1 3734 3758 3739
819 1 3773 3792 3778
820 1 3775 3792 3778
821 1 3774 3793 3777
822 1 3776 3793 3777
823 1 3773 3796 3780
824 1 3775 3796 3780
825 1 3776 3798 3779
826 1 3774 3798 3779
827 2 3818 3813 3729
828 2 3815 3814 3765
829 1 3819 3838 3824
830 1 3821 3838 3824
831 1 3820 3839 3823
832 1 3822 3839 3823
833 1 3819 3842 3826
834 1 3821 3842 3826
835 1 3822 3844 3825
836 1 3820 3844 3825
837 2 3982 3871 3933
838 1 3859 3878 3864
839 1 3861 3878 3864
840 1 3860 3879 3863
841 1 3862 3879 3863
842 3 3859 3882 3866
843 3 3861 3882 3866
844 1 3862 3884 3865
845 1 3860 3884 3865
846 2 3983 3916 3936
847 1 3899 3918 3904
848 1 3901 3918 3904
849 3 3900 3919 3903
850 3 3902 3919 3903
851 1 3899 3922 3906
852 1 3901 3922 3906
853 1 3902 3924 3905
854 1 3900 3924 3905
855 1 3939 3958 3944
856 1 3941 3958 3944
857 1 3940 3959 3943
858 1 3942 3959 3943
859 1 3939 3962 3946
860 1 3941 3962 3946
861 1 3942 3964 3945
862 1 3940 3964 3945
863 2 3984 3979 3895
864 2 3981 3980 3931

```

## LAMMPS Input Script:

```

units      real
atom_style full
boundary   p p p
pair_style lj/cut/coul/long 10
pair_modify mix arithmetic
angle_style harmonic

```

```

bond_style morse

read_data 110-6x4x4Clean.data

kpace_style ewald 0.0001
special_bonds lj 0.0 0.0 0.5
special_bonds coul 0.0 0.0 0.8333

thermo_style custom step etotal ke pe ebond eangle edihed evdwl ecoul elong temp press vol lx ly lz
thermo_modify lost error
thermo 100

timestep 1.0
run_style respa 2 2 pair 1 kspace 2

velocity all create 298 1103 dist gaussian

fix 1 all nve
fix 2 all temp/rescale 1 298.0 298.0 5 1.0

restart 10000 restart.1 restart.2

run 1000000

unfix 2

run 1000000

timestep .001

unfix 1
fix 3 all nve
fix 4 all press/berendsen x 10000 1.0 1000.0 y 10000 1.0 1000.0
fix 5 all temp/rescale 1 298.0 298.0 5 1.0

run 1000000

unfix 4
unfix 5
fix 6 all press/berendsen x 1.0 1.0 10000.0 y 1.0 1.0 10000.0
fix 7 all temp/berendsen 298.0 298.0 100.0
timestep .01

run 1000000

timestep .1
unfix 6
unfix 7
fix 8 all press/berendsen x 1.0 1.0 100000.0 y 1.0 1.0 100000.0
fix 9 all temp/berendsen 298.0 298.0 100.0

run 1000000

timestep 1.0

unfix 8
unfix 9
fix 10 all press/berendsen x 1.0 1.0 1000000.0 y 1.0 1.0 1000000.0
fix 11 all temp/berendsen 298.0 298.0 100.0

run 10000000

unfix 10
unfix 11

run 10000000

dump 1 all custom 2 dump.velo type id x y z vx vy vz
dump_modify 1 sort 2

run 5000000

```

## 110 Pyrophyllite Face Deuterated

### LAMMPS Data File:

LAMMPS data file. clayff2lmp v1.0.0 / 03 Oct 2017 / CGMM for 110-6x4x4-dClean

```

3984 atoms
480 bonds
864 angles
0 dihedrals
0 impropers

8 atom types
3 bond types types
3 angle types types

```

-15.488400000 15.488400000 xlo xhi  
-18.768200000 18.768200000 ylo yhi  
-26.899200000 26.899200000 zlo zhi

Masses

1 26.981540 # ao  
2 1.007970 # ho  
3 15.999400 # ob  
4 15.999400 # oh  
5 28.085500 # st  
6 2.015940 # do  
7 15.999400 # oho  
8 15.999400 # oht

Pair Coeffs # lj/cut/coul/long

1 0.0000013297 4.2713219316 # ao  
2 0.0000000000 0.0000000000 # ho  
3 0.1554164124 3.1655200879 # ob  
4 0.1554164124 3.1655200879 # oh  
5 0.0000018402 3.3019566252 # st  
6 0.0000000000 0.0000000000 # do  
7 0.1554164124 3.1655200879 # oho  
8 0.1554164124 3.1655200879 # oht

Bond Coeffs # harmonic

1 132.2491 2.1815 0.945 # ho-oh  
2 132.2491 2.1815 0.945 # ho-oho  
3 132.2491 2.1815 0.945 # ho-oht

Angle Coeffs # harmonic

1 15.0000 110.0000 # ao-oh-ho  
2 15.0000 110.0000 # ao-oho-do  
3 15.0000 100.0000 # st-oht-do

Atoms # full

1 1 1 1.575000 2.564951898 0.057857326 6.343147493 0 0 0 # ao  
2 1 1 1.575000 5.152091886 0.047832665 2.120047493 0 0 0 # ao  
3 1 1 1.575000 0.010475843 0.041014554 7.691610963 0 0 0 # ao  
4 1 1 1.575000 2.597479300 0.031026926 3.468502305 0 0 0 # ao  
5 1 2 0.425000 3.116355855 1.425163371 1.461851013 0 0 0 # ho  
6 1 2 0.425000 0.545922528 1.523504153 5.731312462 0 0 0 # ho  
7 1 2 0.425000 4.617664323 -1.430790090 4.082601022 0 0 0 # ho  
8 1 2 0.425000 2.046067415 -1.336757339 8.349425190 0 0 0 # ho  
9 1 3 -1.050000 1.974320767 -1.017449350 4.908780749 0 0 0 # ob  
10 1 3 -1.050000 1.589283948 -1.009534011 2.223829865 0 0 0 # ob  
11 1 3 -1.050000 4.162820410 -1.002235530 6.457577115 0 0 0 # ob  
12 1 3 -1.050000 2.219750450 -3.254329459 3.535812584 0 0 0 # ob  
13 1 3 -1.050000 4.804343942 -3.253528090 7.754751701 0 0 0 # ob  
14 1 3 -1.050000 0.606605783 1.108160884 0.680433991 0 0 0 # ob  
15 1 3 -1.050000 3.188175495 1.106315515 4.902851743 0 0 0 # ob  
16 1 3 -1.050000 2.355525134 3.339943172 3.727147445 0 0 0 # ob  
17 1 3 -1.050000 4.928942666 3.343459909 7.955469793 0 0 0 # ob  
18 1 3 -1.050000 0.358599510 3.342745271 2.056943562 0 0 0 # ob  
19 1 3 -1.050000 2.943159518 3.343022387 6.275700930 0 0 0 # ob  
20 1 4 -0.950000 0.973817447 1.030057382 6.456311812 0 0 0 # oh  
21 1 4 -0.950000 3.559070440 1.017364731 2.229260000 0 0 0 # oh  
22 1 3 -1.050000 2.368990946 3.066493209 0.417596118 0 0 0 # ob  
23 1 3 -1.050000 4.963275993 3.050340270 4.648938892 0 0 0 # ob  
24 1 4 -0.950000 1.603365723 -0.928489933 7.582229270 0 0 0 # oh  
25 1 3 -1.050000 0.199951485 -2.961853389 5.162916698 0 0 0 # ob  
26 1 4 -0.950000 4.188976468 -0.940763219 3.355759607 0 0 0 # oh  
27 1 3 -1.050000 2.793669734 -2.977677046 0.944364434 0 0 0 # ob  
28 1 3 -1.050000 0.999937272 1.091158613 3.353842278 0 0 0 # ob  
29 1 3 -1.050000 3.573485134 1.098365238 7.587875661 0 0 0 # ob  
30 1 3 -1.050000 4.555837623 -1.019123292 0.681739972 0 0 0 # ob  
31 1 3 -1.050000 0.233734585 -3.254366293 1.856176368 0 0 0 # ob  
32 1 3 -1.050000 2.807687271 -3.251063569 6.084357725 0 0 0 # ob  
33 1 5 2.100000 0.877003477 2.720599038 3.452486522 0 0 0 # st  
34 1 5 2.100000 3.449029217 2.729580341 7.680379551 0 0 0 # st  
35 1 5 2.100000 4.372376051 -2.638063392 0.744074984 0 0 0 # st  
36 1 5 2.100000 1.713733961 -2.640760033 2.131278354 0 0 0 # st  
37 1 5 2.100000 4.286150250 -2.631682580 6.359024273 0 0 0 # st  
38 1 5 2.100000 0.790278839 2.727049911 0.617961151 0 0 0 # st  
39 1 5 2.100000 3.378672668 2.723397425 4.839744045 0 0 0 # st  
40 1 5 2.100000 1.784418745 -2.634695815 4.971778212 0 0 0 # st  
41 1 1 1.575000 2.564951898 0.057857326 14.792747493 0 0 0 # ao  
42 1 1 1.575000 5.152091886 0.047832665 10.569647493 0 0 0 # ao  
43 1 1 1.575000 0.010475843 0.041014554 16.141210963 0 0 0 # ao  
44 1 1 1.575000 2.597479300 0.031026926 11.918102305 0 0 0 # ao  
45 1 2 0.425000 3.116355855 1.425163371 9.911451013 0 0 0 # ho  
46 1 2 0.425000 0.545922528 1.523504153 14.180912462 0 0 0 # ho  
47 1 2 0.425000 4.617664323 -1.430790090 12.532201022 0 0 0 # ho  
48 1 6 0.425000 2.046067415 -1.336757339 16.799025190 0 0 0 # do  
49 1 3 -1.050000 1.974320767 -1.017449350 13.358380749 0 0 0 # ob  
50 1 3 -1.050000 1.589283948 -1.009534011 10.673429865 0 0 0 # ob  
51 1 3 -1.050000 4.162820410 -1.002235530 14.907177115 0 0 0 # ob  
52 1 3 -1.050000 2.219750450 -3.254329459 11.985412584 0 0 0 # ob  
53 1 3 -1.050000 0.606605783 1.108160884 9.130033991 0 0 0 # ob

|     |   |   |           |              |              |              |   |   |   |     |
|-----|---|---|-----------|--------------|--------------|--------------|---|---|---|-----|
| 54  | 1 | 3 | -1.050000 | 3.188175495  | 1.106315515  | 13.352451743 | 0 | 0 | 0 | ob  |
| 55  | 1 | 3 | -1.050000 | 2.355525134  | 3.339943172  | 12.176747445 | 0 | 0 | 0 | ob  |
| 56  | 1 | 3 | -1.050000 | 4.928942666  | 3.343459909  | 16.405069793 | 0 | 0 | 0 | ob  |
| 57  | 1 | 3 | -1.050000 | 0.358599510  | 3.342745271  | 10.506543562 | 0 | 0 | 0 | ob  |
| 58  | 1 | 3 | -1.050000 | 2.943159518  | 3.343022387  | 14.725300930 | 0 | 0 | 0 | ob  |
| 59  | 1 | 4 | -0.950000 | 0.973817447  | 1.030057382  | 14.905911812 | 0 | 0 | 0 | oh  |
| 60  | 1 | 4 | -0.950000 | 3.559070440  | 1.017364731  | 10.678860000 | 0 | 0 | 0 | oh  |
| 61  | 1 | 3 | -1.050000 | 2.368990946  | 3.066493209  | 8.867196118  | 0 | 0 | 0 | ob  |
| 62  | 1 | 3 | -1.050000 | 4.963275993  | 3.050340270  | 13.098538892 | 0 | 0 | 0 | ob  |
| 63  | 1 | 7 | -0.950000 | 1.603365723  | -0.928489933 | 16.031829270 | 0 | 0 | 0 | oho |
| 64  | 1 | 3 | -1.050000 | 0.199951485  | -2.961853389 | 13.612516698 | 0 | 0 | 0 | ob  |
| 65  | 1 | 4 | -0.950000 | 4.188976468  | -0.940763219 | 11.805359607 | 0 | 0 | 0 | oh  |
| 66  | 1 | 3 | -1.050000 | 2.793669734  | -2.977677046 | 9.393964434  | 0 | 0 | 0 | ob  |
| 67  | 1 | 3 | -1.050000 | 0.999937272  | 1.091158613  | 11.803442278 | 0 | 0 | 0 | ob  |
| 68  | 1 | 3 | -1.050000 | 3.573485134  | 1.098365238  | 16.037475661 | 0 | 0 | 0 | ob  |
| 69  | 1 | 3 | -1.050000 | 4.555837623  | -1.019123292 | 9.131339972  | 0 | 0 | 0 | ob  |
| 70  | 1 | 3 | -1.050000 | 0.233734585  | -3.254366293 | 10.305776368 | 0 | 0 | 0 | ob  |
| 71  | 1 | 3 | -1.050000 | 2.807687271  | -3.251063569 | 14.533957725 | 0 | 0 | 0 | ob  |
| 72  | 1 | 5 | 2.100000  | 0.877003477  | 2.720599038  | 11.902086522 | 0 | 0 | 0 | st  |
| 73  | 1 | 5 | 2.100000  | 3.449029217  | 2.729580341  | 16.129979551 | 0 | 0 | 0 | st  |
| 74  | 1 | 5 | 2.100000  | 4.372376051  | -2.638063392 | 9.193674984  | 0 | 0 | 0 | st  |
| 75  | 1 | 5 | 2.100000  | 1.713733961  | -2.640760033 | 10.580878354 | 0 | 0 | 0 | st  |
| 76  | 1 | 5 | 2.100000  | 4.286150250  | -2.631682580 | 14.808624273 | 0 | 0 | 0 | st  |
| 77  | 1 | 5 | 2.100000  | 0.790278839  | 2.727049911  | 9.067561151  | 0 | 0 | 0 | st  |
| 78  | 1 | 5 | 2.100000  | 3.378672668  | 2.723397425  | 13.289344045 | 0 | 0 | 0 | st  |
| 79  | 1 | 5 | 2.100000  | 1.784418745  | -2.634695815 | 13.421378212 | 0 | 0 | 0 | st  |
| 80  | 1 | 3 | -1.050000 | 0.606605783  | 1.108160884  | 17.579633991 | 0 | 0 | 0 | ob  |
| 81  | 1 | 8 | -0.950000 | 0.358599510  | 3.342745271  | 18.956143562 | 0 | 0 | 0 | oht |
| 82  | 1 | 3 | -1.050000 | 2.368990946  | 3.066493209  | 17.316796118 | 0 | 0 | 0 | ob  |
| 83  | 1 | 5 | 2.100000  | 0.790278839  | 2.727049911  | 17.517161151 | 0 | 0 | 0 | st  |
| 84  | 1 | 8 | -0.950000 | 4.846051183  | -2.634071151 | 16.634714390 | 0 | 0 | 0 | oht |
| 85  | 1 | 6 | 0.425000  | 0.435438959  | 3.250098365  | 20.059598264 | 0 | 0 | 0 | do  |
| 86  | 1 | 6 | 0.425000  | 4.457833436  | -2.533686233 | 17.669755394 | 0 | 0 | 0 | do  |
| 87  | 2 | 1 | 1.575000  | 7.727751898  | 0.057857326  | 6.343147493  | 0 | 0 | 0 | ao  |
| 88  | 2 | 1 | 1.575000  | 10.314891886 | 0.047832665  | 2.120047493  | 0 | 0 | 0 | ao  |
| 89  | 2 | 1 | 1.575000  | 5.173275843  | 0.041014554  | 7.691610963  | 0 | 0 | 0 | ao  |
| 90  | 2 | 1 | 1.575000  | 7.760279300  | 0.031026926  | 3.468502305  | 0 | 0 | 0 | ao  |
| 91  | 2 | 2 | 0.425000  | 8.279155855  | 1.425163371  | 1.461851013  | 0 | 0 | 0 | ho  |
| 92  | 2 | 2 | 0.425000  | 5.708722528  | 1.523504153  | 5.731312462  | 0 | 0 | 0 | ho  |
| 93  | 2 | 2 | 0.425000  | 9.780464323  | -1.430790090 | 4.082601022  | 0 | 0 | 0 | ho  |
| 94  | 2 | 2 | 0.425000  | 7.208867415  | -1.336757339 | 8.349425190  | 0 | 0 | 0 | ho  |
| 95  | 2 | 3 | -1.050000 | 7.137120767  | -1.017449350 | 4.908780749  | 0 | 0 | 0 | ob  |
| 96  | 2 | 3 | -1.050000 | 6.752083948  | -1.009534011 | 2.223829865  | 0 | 0 | 0 | ob  |
| 97  | 2 | 3 | -1.050000 | 9.325620410  | -1.002235530 | 6.457577115  | 0 | 0 | 0 | ob  |
| 98  | 2 | 3 | -1.050000 | 7.382550450  | -3.254329459 | 3.535812584  | 0 | 0 | 0 | ob  |
| 99  | 2 | 3 | -1.050000 | 9.967143942  | -3.253528090 | 7.754751701  | 0 | 0 | 0 | ob  |
| 100 | 2 | 3 | -1.050000 | 5.769405783  | 1.108160884  | 0.680433991  | 0 | 0 | 0 | ob  |
| 101 | 2 | 3 | -1.050000 | 8.350975495  | 1.106315515  | 4.902851743  | 0 | 0 | 0 | ob  |
| 102 | 2 | 3 | -1.050000 | 7.518325134  | 3.339943172  | 3.727147445  | 0 | 0 | 0 | ob  |
| 103 | 2 | 3 | -1.050000 | 10.091742666 | 3.343459909  | 7.955469793  | 0 | 0 | 0 | ob  |
| 104 | 2 | 3 | -1.050000 | 5.521399510  | 3.342745271  | 2.056943562  | 0 | 0 | 0 | ob  |
| 105 | 2 | 3 | -1.050000 | 8.105959518  | 3.343022387  | 6.275700930  | 0 | 0 | 0 | ob  |
| 106 | 2 | 4 | -0.950000 | 6.136617447  | 1.030057382  | 6.456311812  | 0 | 0 | 0 | oh  |
| 107 | 2 | 4 | -0.950000 | 8.721870440  | 1.017364731  | 2.229260000  | 0 | 0 | 0 | oh  |
| 108 | 2 | 3 | -1.050000 | 7.531790946  | 3.066493209  | 0.417596118  | 0 | 0 | 0 | ob  |
| 109 | 2 | 3 | -1.050000 | 10.126075993 | 3.050340270  | 4.648938892  | 0 | 0 | 0 | ob  |
| 110 | 2 | 4 | -0.950000 | 6.766165723  | -0.928489933 | 7.582229270  | 0 | 0 | 0 | oh  |
| 111 | 2 | 3 | -1.050000 | 5.362751485  | -2.961853389 | 5.162916698  | 0 | 0 | 0 | ob  |
| 112 | 2 | 4 | -0.950000 | 9.351776468  | -0.940763219 | 3.355759607  | 0 | 0 | 0 | oh  |
| 113 | 2 | 3 | -1.050000 | 7.956469734  | -2.977677046 | 0.944364434  | 0 | 0 | 0 | ob  |
| 114 | 2 | 3 | -1.050000 | 6.162737272  | 1.091158613  | 3.353842278  | 0 | 0 | 0 | ob  |
| 115 | 2 | 3 | -1.050000 | 8.736285134  | 1.098365238  | 7.587875661  | 0 | 0 | 0 | ob  |
| 116 | 2 | 3 | -1.050000 | 9.718637623  | -1.019123292 | 0.681739972  | 0 | 0 | 0 | ob  |
| 117 | 2 | 3 | -1.050000 | 5.396534585  | -3.254366293 | 1.856176368  | 0 | 0 | 0 | ob  |
| 118 | 2 | 3 | -1.050000 | 7.970487271  | -3.251063569 | 6.084357725  | 0 | 0 | 0 | ob  |
| 119 | 2 | 5 | 2.100000  | 6.039803477  | 2.720599038  | 3.452486522  | 0 | 0 | 0 | st  |
| 120 | 2 | 5 | 2.100000  | 8.611829217  | 2.729580341  | 7.680379551  | 0 | 0 | 0 | st  |
| 121 | 2 | 5 | 2.100000  | 9.535176051  | -2.638063392 | 0.744074984  | 0 | 0 | 0 | st  |
| 122 | 2 | 5 | 2.100000  | 6.876533961  | -2.640760033 | 2.131278354  | 0 | 0 | 0 | st  |
| 123 | 2 | 5 | 2.100000  | 9.448950250  | -2.631682580 | 6.359024273  | 0 | 0 | 0 | st  |
| 124 | 2 | 5 | 2.100000  | 5.953078839  | 2.727049911  | 0.617961151  | 0 | 0 | 0 | st  |
| 125 | 2 | 5 | 2.100000  | 8.541472668  | 2.723397425  | 4.839744045  | 0 | 0 | 0 | st  |
| 126 | 2 | 5 | 2.100000  | 6.947218745  | -2.634695815 | 4.971778212  | 0 | 0 | 0 | st  |
| 127 | 2 | 1 | 1.575000  | 7.727751898  | 0.057857326  | 14.792747493 | 0 | 0 | 0 | ao  |
| 128 | 2 | 1 | 1.575000  | 10.314891886 | 0.047832665  | 10.569647493 | 0 | 0 | 0 | ao  |
| 129 | 2 | 1 | 1.575000  | 5.173275843  | 0.041014554  | 16.141210963 | 0 | 0 | 0 | ao  |
| 130 | 2 | 1 | 1.575000  | 7.760279300  | 0.031026926  | 11.918102305 | 0 | 0 | 0 | ao  |
| 131 | 2 | 2 | 0.425000  | 8.279155855  | 1.425163371  | 9.911451013  | 0 | 0 | 0 | ho  |
| 132 | 2 | 2 | 0.425000  | 5.708722528  | 1.523504153  | 14.180912462 | 0 | 0 | 0 | ho  |
| 133 | 2 | 2 | 0.425000  | 9.780464323  | -1.430790090 | 12.532201022 | 0 | 0 | 0 | ho  |
| 134 | 2 | 6 | 0.425000  | 7.208867415  | -1.336757339 | 16.799025190 | 0 | 0 | 0 | do  |
| 135 | 2 | 3 | -1.050000 | 7.137120767  | -1.017449350 | 13.358380749 | 0 | 0 | 0 | ob  |
| 136 | 2 | 3 | -1.050000 | 6.752083948  | -1.009534011 | 10.673429865 | 0 | 0 | 0 | ob  |
| 137 | 2 | 3 | -1.050000 | 9.325620410  | -1.002235530 | 14.907177115 | 0 | 0 | 0 | ob  |
| 138 | 2 | 3 | -1.050000 | 7.382550450  | -3.254329459 | 11.985412584 | 0 | 0 | 0 | ob  |
| 139 | 2 | 3 | -1.050000 | 5.769405783  | 1.108160884  | 9.130033991  | 0 | 0 | 0 | ob  |
| 140 | 2 | 3 | -1.050000 | 8.350975495  | 1.106315515  | 13.352451743 | 0 | 0 | 0 | ob  |
| 141 | 2 | 3 | -1.050000 | 7.518325134  | 3.339943172  | 12.176747445 | 0 | 0 | 0 | ob  |
| 142 | 2 | 3 | -1.050000 | 10.091742666 | 3.343459909  | 16.405069793 | 0 | 0 | 0 | ob  |
| 143 | 2 | 3 | -1.050000 | 5.521399510  | 3.342745271  | 10.506543562 | 0 | 0 | 0 | ob  |
| 144 | 2 | 3 | -1.050000 | 8.105959518  | 3.343022387  | 14.725300930 | 0 | 0 | 0 | ob  |
| 145 | 2 | 4 | -0.950000 | 6.136617447  | 1.030057382  | 14.905911812 | 0 | 0 | 0 | oh  |
| 146 | 2 | 4 | -0.950000 | 8.721870440  | 1.017364731  | 10.678860000 | 0 | 0 | 0 | oh  |



|     |   |   |           |              |              |              |   |   |   |     |
|-----|---|---|-----------|--------------|--------------|--------------|---|---|---|-----|
| 147 | 2 | 3 | -1.050000 | 7.531790946  | 3.066493209  | 8.867196118  | 0 | 0 | 0 | ob  |
| 148 | 2 | 3 | -1.050000 | 10.126075993 | 3.050340270  | 13.098538892 | 0 | 0 | 0 | ob  |
| 149 | 2 | 7 | -0.950000 | 6.766165723  | -0.928489933 | 16.031829270 | 0 | 0 | 0 | oho |
| 150 | 2 | 3 | -1.050000 | 5.362751485  | -2.961853389 | 13.612516698 | 0 | 0 | 0 | ob  |
| 151 | 2 | 4 | -0.950000 | 9.351776468  | -0.940763219 | 11.805359607 | 0 | 0 | 0 | oh  |
| 152 | 2 | 3 | -1.050000 | 7.956469734  | -2.977677046 | 9.393964434  | 0 | 0 | 0 | ob  |
| 153 | 2 | 3 | -1.050000 | 6.162737272  | 1.091158613  | 11.803442278 | 0 | 0 | 0 | ob  |
| 154 | 2 | 3 | -1.050000 | 8.736285134  | 1.098365238  | 16.037475661 | 0 | 0 | 0 | ob  |
| 155 | 2 | 3 | -1.050000 | 9.718637623  | -1.019123292 | 9.131339972  | 0 | 0 | 0 | ob  |
| 156 | 2 | 3 | -1.050000 | 5.396534585  | -3.254366293 | 10.305776368 | 0 | 0 | 0 | ob  |
| 157 | 2 | 3 | -1.050000 | 7.970487271  | -3.251063569 | 14.533957725 | 0 | 0 | 0 | ob  |
| 158 | 2 | 5 | 2.100000  | 6.039803477  | 2.720599038  | 11.902086522 | 0 | 0 | 0 | st  |
| 159 | 2 | 5 | 2.100000  | 8.611829217  | 2.729580341  | 16.129979551 | 0 | 0 | 0 | st  |
| 160 | 2 | 5 | 2.100000  | 9.535176051  | -2.638063392 | 9.193674984  | 0 | 0 | 0 | st  |
| 161 | 2 | 5 | 2.100000  | 6.876533961  | -2.640760033 | 10.580878354 | 0 | 0 | 0 | st  |
| 162 | 2 | 5 | 2.100000  | 9.448950250  | -2.631682580 | 14.808624273 | 0 | 0 | 0 | st  |
| 163 | 2 | 5 | 2.100000  | 5.953078839  | 2.727049911  | 9.067561151  | 0 | 0 | 0 | st  |
| 164 | 2 | 5 | 2.100000  | 8.541472668  | 2.723397425  | 13.289344045 | 0 | 0 | 0 | st  |
| 165 | 2 | 5 | 2.100000  | 6.947218745  | -2.634695815 | 13.421378212 | 0 | 0 | 0 | st  |
| 166 | 2 | 3 | -1.050000 | 5.769405783  | 1.108160884  | 17.579633991 | 0 | 0 | 0 | ob  |
| 167 | 2 | 8 | -0.950000 | 5.521399510  | 3.342745271  | 18.956143562 | 0 | 0 | 0 | oht |
| 168 | 2 | 3 | -1.050000 | 7.531790946  | 3.066493209  | 17.316796118 | 0 | 0 | 0 | ob  |
| 169 | 2 | 5 | 2.100000  | 5.953078839  | 2.727049911  | 17.517161151 | 0 | 0 | 0 | st  |
| 170 | 2 | 8 | -0.950000 | 10.008851183 | -2.634071151 | 16.634714390 | 0 | 0 | 0 | oht |
| 171 | 2 | 6 | 0.425000  | 5.598238959  | 3.250098365  | 20.059598264 | 0 | 0 | 0 | do  |
| 172 | 2 | 6 | 0.425000  | 9.620633436  | -2.533686233 | 17.669755394 | 0 | 0 | 0 | do  |
| 173 | 3 | 1 | 1.575000  | 12.890551898 | 0.057857326  | 6.343147493  | 0 | 0 | 0 | ao  |
| 174 | 3 | 1 | 1.575000  | 15.477691886 | 0.047832665  | 2.120047493  | 0 | 0 | 0 | ao  |
| 175 | 3 | 1 | 1.575000  | 10.336075843 | 0.041014554  | 7.691610963  | 0 | 0 | 0 | ao  |
| 176 | 3 | 1 | 1.575000  | 12.923079300 | 0.031026926  | 3.468502305  | 0 | 0 | 0 | ao  |
| 177 | 3 | 2 | 0.425000  | 13.441955855 | 1.425163371  | 1.461851013  | 0 | 0 | 0 | ho  |
| 178 | 3 | 2 | 0.425000  | 10.871522528 | 1.523504153  | 5.731312462  | 0 | 0 | 0 | ho  |
| 179 | 3 | 2 | 0.425000  | 14.943264323 | -1.430790090 | 4.082601022  | 0 | 0 | 0 | ho  |
| 180 | 3 | 2 | 0.425000  | 12.371667415 | -1.336757339 | 8.349425190  | 0 | 0 | 0 | ho  |
| 181 | 3 | 3 | -1.050000 | 12.299920767 | -1.017449350 | 4.908780749  | 0 | 0 | 0 | ob  |
| 182 | 3 | 3 | -1.050000 | 11.914883948 | -1.009534011 | 2.223829865  | 0 | 0 | 0 | ob  |
| 183 | 3 | 3 | -1.050000 | 14.488420410 | -1.002235530 | 6.457577115  | 0 | 0 | 0 | ob  |
| 184 | 3 | 3 | -1.050000 | 12.545350450 | -3.254329459 | 3.535812584  | 0 | 0 | 0 | ob  |
| 185 | 3 | 3 | -1.050000 | 15.129943942 | -3.253528090 | 7.754751701  | 0 | 0 | 0 | ob  |
| 186 | 3 | 3 | -1.050000 | 10.932205783 | 1.108160884  | 0.680433991  | 0 | 0 | 0 | ob  |
| 187 | 3 | 3 | -1.050000 | 13.513775495 | 1.106315515  | 4.902851743  | 0 | 0 | 0 | ob  |
| 188 | 3 | 3 | -1.050000 | 12.681125134 | 3.339943172  | 3.727147445  | 0 | 0 | 0 | ob  |
| 189 | 3 | 3 | -1.050000 | 15.254542666 | 3.343459909  | 7.955469793  | 0 | 0 | 0 | ob  |
| 190 | 3 | 3 | -1.050000 | 10.684199510 | 3.342745271  | 2.056943562  | 0 | 0 | 0 | ob  |
| 191 | 3 | 3 | -1.050000 | 13.268759518 | 3.343022387  | 6.275700930  | 0 | 0 | 0 | ob  |
| 192 | 3 | 4 | -0.950000 | 11.299417447 | 1.030057382  | 6.456311812  | 0 | 0 | 0 | oh  |
| 193 | 3 | 4 | -0.950000 | 13.884670440 | 1.017364731  | 2.229260000  | 0 | 0 | 0 | oh  |
| 194 | 3 | 3 | -1.050000 | 12.694590946 | 3.066493209  | 0.417596118  | 0 | 0 | 0 | ob  |
| 195 | 3 | 3 | -1.050000 | 15.288875993 | 3.050340270  | 4.648938892  | 0 | 0 | 0 | ob  |
| 196 | 3 | 4 | -0.950000 | 11.928965723 | -0.928489933 | 7.582229270  | 0 | 0 | 0 | oh  |
| 197 | 3 | 3 | -1.050000 | 10.525551485 | -2.961853389 | 5.162916698  | 0 | 0 | 0 | ob  |
| 198 | 3 | 4 | -0.950000 | 14.514576468 | -0.940763219 | 3.355759607  | 0 | 0 | 0 | oh  |
| 199 | 3 | 3 | -1.050000 | 13.119269734 | -2.977677046 | 0.944364434  | 0 | 0 | 0 | ob  |
| 200 | 3 | 3 | -1.050000 | 11.325537272 | 1.091158613  | 3.353842278  | 0 | 0 | 0 | ob  |
| 201 | 3 | 3 | -1.050000 | 13.899085134 | 1.098365238  | 7.587875661  | 0 | 0 | 0 | ob  |
| 202 | 3 | 3 | -1.050000 | 14.881437623 | -1.019123292 | 0.681739972  | 0 | 0 | 0 | ob  |
| 203 | 3 | 3 | -1.050000 | 10.559334585 | -3.254366293 | 1.856176368  | 0 | 0 | 0 | ob  |
| 204 | 3 | 3 | -1.050000 | 13.133287271 | -3.251063569 | 6.084357725  | 0 | 0 | 0 | ob  |
| 205 | 3 | 5 | 2.100000  | 11.202603477 | 2.720599038  | 3.452486522  | 0 | 0 | 0 | st  |
| 206 | 3 | 5 | 2.100000  | 13.774629217 | 2.729580341  | 7.680379551  | 0 | 0 | 0 | st  |
| 207 | 3 | 5 | 2.100000  | 14.697976051 | -2.638063392 | 0.744074984  | 0 | 0 | 0 | st  |
| 208 | 3 | 5 | 2.100000  | 12.039333961 | -2.640760033 | 2.131278354  | 0 | 0 | 0 | st  |
| 209 | 3 | 5 | 2.100000  | 14.611750250 | -2.631682580 | 6.359024273  | 0 | 0 | 0 | st  |
| 210 | 3 | 5 | 2.100000  | 11.115878839 | 2.727049911  | 0.617961151  | 0 | 0 | 0 | st  |
| 211 | 3 | 5 | 2.100000  | 13.704272668 | 2.723397425  | 4.839744045  | 0 | 0 | 0 | st  |
| 212 | 3 | 5 | 2.100000  | 12.110018745 | -2.634695815 | 4.971778212  | 0 | 0 | 0 | st  |
| 213 | 3 | 1 | 1.575000  | 12.890551898 | 0.057857326  | 14.792747493 | 0 | 0 | 0 | ao  |
| 214 | 3 | 1 | 1.575000  | 15.477691886 | 0.047832665  | 10.569647493 | 0 | 0 | 0 | ao  |
| 215 | 3 | 1 | 1.575000  | 10.336075843 | 0.041014554  | 16.141210963 | 0 | 0 | 0 | ao  |
| 216 | 3 | 1 | 1.575000  | 12.923079300 | 0.031026926  | 11.918102305 | 0 | 0 | 0 | ao  |
| 217 | 3 | 2 | 0.425000  | 13.441955855 | 1.425163371  | 9.911451013  | 0 | 0 | 0 | ho  |
| 218 | 3 | 2 | 0.425000  | 10.871522528 | 1.523504153  | 14.180912462 | 0 | 0 | 0 | ho  |
| 219 | 3 | 2 | 0.425000  | 14.943264323 | -1.430790090 | 12.532201022 | 0 | 0 | 0 | ho  |
| 220 | 3 | 6 | 0.425000  | 12.371667415 | -1.336757339 | 16.799025190 | 0 | 0 | 0 | do  |
| 221 | 3 | 3 | -1.050000 | 12.299920767 | -1.017449350 | 13.358380749 | 0 | 0 | 0 | ob  |
| 222 | 3 | 3 | -1.050000 | 11.914883948 | -1.009534011 | 10.673429865 | 0 | 0 | 0 | ob  |
| 223 | 3 | 3 | -1.050000 | 14.488420410 | -1.002235530 | 14.907177115 | 0 | 0 | 0 | ob  |
| 224 | 3 | 3 | -1.050000 | 12.545350450 | -3.254329459 | 11.985412584 | 0 | 0 | 0 | ob  |
| 225 | 3 | 3 | -1.050000 | 10.932205783 | 1.108160884  | 9.130033991  | 0 | 0 | 0 | ob  |
| 226 | 3 | 3 | -1.050000 | 13.513775495 | 1.106315515  | 13.352451743 | 0 | 0 | 0 | ob  |
| 227 | 3 | 3 | -1.050000 | 12.681125134 | 3.339943172  | 12.176747445 | 0 | 0 | 0 | ob  |
| 228 | 3 | 3 | -1.050000 | 15.254542666 | 3.343459909  | 16.405069793 | 0 | 0 | 0 | ob  |
| 229 | 3 | 3 | -1.050000 | 10.684199510 | 3.342745271  | 10.506543562 | 0 | 0 | 0 | ob  |
| 230 | 3 | 3 | -1.050000 | 13.268759518 | 3.343022387  | 14.725300930 | 0 | 0 | 0 | ob  |
| 231 | 3 | 4 | -0.950000 | 11.299417447 | 1.030057382  | 14.905911812 | 0 | 0 | 0 | oh  |
| 232 | 3 | 4 | -0.950000 | 13.884670440 | 1.017364731  | 10.678860000 | 0 | 0 | 0 | oh  |
| 233 | 3 | 3 | -1.050000 | 12.694590946 | 3.066493209  | 8.867196118  | 0 | 0 | 0 | ob  |
| 234 | 3 | 3 | -1.050000 | 15.288875993 | 3.050340270  | 13.098538892 | 0 | 0 | 0 | ob  |
| 235 | 3 | 7 | -0.950000 | 11.928965723 | -0.928489933 | 16.031829270 | 0 | 0 | 0 | oho |
| 236 | 3 | 3 | -1.050000 | 10.525551485 | -2.961853389 | 13.612516698 | 0 | 0 | 0 | ob  |
| 237 | 3 | 4 | -0.950000 | 14.514576468 | -0.940763219 | 11.805359607 | 0 | 0 | 0 | oh  |
| 238 | 3 | 3 | -1.050000 | 13.119269734 | -2.977677046 | 9.393964434  | 0 | 0 | 0 | ob  |
| 239 | 3 | 3 | -1.050000 | 11.325537272 | 1.091158613  | 11.803442278 | 0 | 0 | 0 | ob  |

|     |   |   |           |               |              |              |   |   |   |   |     |
|-----|---|---|-----------|---------------|--------------|--------------|---|---|---|---|-----|
| 240 | 3 | 3 | -1.050000 | 13.899085134  | 1.098365238  | 16.037475661 | 0 | 0 | 0 | # | ob  |
| 241 | 3 | 3 | -1.050000 | 14.881437623  | -1.019123292 | 9.131339972  | 0 | 0 | 0 | # | ob  |
| 242 | 3 | 3 | -1.050000 | 10.559334585  | -3.254366293 | 10.305776368 | 0 | 0 | 0 | # | ob  |
| 243 | 3 | 3 | -1.050000 | 13.133287271  | -3.251063569 | 14.533957725 | 0 | 0 | 0 | # | ob  |
| 244 | 3 | 5 | 2.100000  | 11.202603477  | 2.720599038  | 11.902086522 | 0 | 0 | 0 | # | st  |
| 245 | 3 | 5 | 2.100000  | 13.774629217  | 2.729580341  | 16.129979551 | 0 | 0 | 0 | # | st  |
| 246 | 3 | 5 | 2.100000  | 14.697976051  | -2.638063392 | 9.193674984  | 0 | 0 | 0 | # | st  |
| 247 | 3 | 5 | 2.100000  | 12.039333961  | -2.640760033 | 10.580878354 | 0 | 0 | 0 | # | st  |
| 248 | 3 | 5 | 2.100000  | 14.611750250  | -2.631682580 | 14.808624273 | 0 | 0 | 0 | # | st  |
| 249 | 3 | 5 | 2.100000  | 11.115878839  | 2.727049911  | 9.067561151  | 0 | 0 | 0 | # | st  |
| 250 | 3 | 5 | 2.100000  | 13.704272668  | 2.723397425  | 13.289344045 | 0 | 0 | 0 | # | st  |
| 251 | 3 | 5 | 2.100000  | 12.110018745  | -2.634695815 | 13.421378212 | 0 | 0 | 0 | # | st  |
| 252 | 3 | 3 | -1.050000 | 10.932205783  | 1.108160884  | 17.579633991 | 0 | 0 | 0 | # | ob  |
| 253 | 3 | 8 | -0.950000 | 10.684199510  | 3.342745271  | 18.956143562 | 0 | 0 | 0 | # | oht |
| 254 | 3 | 3 | -1.050000 | 12.694590946  | 3.066493209  | 17.316796118 | 0 | 0 | 0 | # | ob  |
| 255 | 3 | 5 | 2.100000  | 11.115878839  | 2.727049911  | 17.517161151 | 0 | 0 | 0 | # | st  |
| 256 | 3 | 8 | -0.950000 | 15.171651183  | -2.634071151 | 16.634714390 | 0 | 0 | 0 | # | oht |
| 257 | 3 | 6 | 0.425000  | 10.761038959  | 3.250098365  | 20.059598264 | 0 | 0 | 0 | # | do  |
| 258 | 3 | 6 | 0.425000  | 14.783433436  | -2.533686233 | 17.669755394 | 0 | 0 | 0 | # | do  |
| 259 | 4 | 1 | 1.575000  | -12.923448102 | 0.057857326  | 6.343147493  | 1 | 0 | 0 | # | ao  |
| 260 | 4 | 1 | 1.575000  | -10.336308114 | 0.047832665  | 2.120047493  | 1 | 0 | 0 | # | ao  |
| 261 | 4 | 1 | 1.575000  | -15.477924157 | 0.041014554  | 7.691610963  | 1 | 0 | 0 | # | ao  |
| 262 | 4 | 1 | 1.575000  | -12.890920700 | 0.031026926  | 3.468502305  | 1 | 0 | 0 | # | ao  |
| 263 | 4 | 2 | 0.425000  | -12.372044145 | 1.425163371  | 1.461851013  | 1 | 0 | 0 | # | ho  |
| 264 | 4 | 2 | 0.425000  | -14.942477472 | 1.523504153  | 5.731312462  | 1 | 0 | 0 | # | ho  |
| 265 | 4 | 2 | 0.425000  | -10.870735677 | -1.430790090 | 4.082601022  | 1 | 0 | 0 | # | ho  |
| 266 | 4 | 2 | 0.425000  | -13.442332585 | -1.336757339 | 8.349425190  | 1 | 0 | 0 | # | ho  |
| 267 | 4 | 3 | -1.050000 | -13.514079233 | -1.017449350 | 4.908780749  | 1 | 0 | 0 | # | ob  |
| 268 | 4 | 3 | -1.050000 | -13.899116052 | -1.009534011 | 2.223829865  | 1 | 0 | 0 | # | ob  |
| 269 | 4 | 3 | -1.050000 | -11.325579590 | -1.002235530 | 6.457577115  | 1 | 0 | 0 | # | ob  |
| 270 | 4 | 3 | -1.050000 | -13.268649550 | -3.254329459 | 3.535812584  | 1 | 0 | 0 | # | ob  |
| 271 | 4 | 3 | -1.050000 | -10.684056058 | -3.253528090 | 7.754751701  | 1 | 0 | 0 | # | ob  |
| 272 | 4 | 3 | -1.050000 | -14.881794217 | 1.108160884  | 0.680433991  | 1 | 0 | 0 | # | ob  |
| 273 | 4 | 3 | -1.050000 | -12.300224505 | 1.106315515  | 4.902851743  | 1 | 0 | 0 | # | ob  |
| 274 | 4 | 3 | -1.050000 | -13.132874866 | 3.339943172  | 3.727147445  | 1 | 0 | 0 | # | ob  |
| 275 | 4 | 3 | -1.050000 | -10.559457334 | 3.343459909  | 7.955469793  | 1 | 0 | 0 | # | ob  |
| 276 | 4 | 3 | -1.050000 | -15.129800490 | 3.342745271  | 2.056943562  | 1 | 0 | 0 | # | ob  |
| 277 | 4 | 3 | -1.050000 | -12.545240482 | 3.343022387  | 6.275700930  | 1 | 0 | 0 | # | ob  |
| 278 | 4 | 4 | -0.950000 | -14.514582553 | 1.030057382  | 6.456311812  | 1 | 0 | 0 | # | oh  |
| 279 | 4 | 4 | -0.950000 | -11.929329560 | 1.017364731  | 2.229260000  | 1 | 0 | 0 | # | oh  |
| 280 | 4 | 3 | -1.050000 | -13.119409054 | 3.066493209  | 0.417596118  | 1 | 0 | 0 | # | ob  |
| 281 | 4 | 3 | -1.050000 | -10.525124007 | 3.050340270  | 4.648938892  | 1 | 0 | 0 | # | ob  |
| 282 | 4 | 4 | -0.950000 | -13.885034277 | -0.928489933 | 7.582229270  | 1 | 0 | 0 | # | oh  |
| 283 | 4 | 3 | -1.050000 | -15.288448515 | -2.961853389 | 5.162916698  | 1 | 0 | 0 | # | ob  |
| 284 | 4 | 4 | -0.950000 | -11.299423532 | -0.940763219 | 3.355759607  | 1 | 0 | 0 | # | oh  |
| 285 | 4 | 3 | -1.050000 | -12.694730266 | -2.977677046 | 0.944364434  | 1 | 0 | 0 | # | ob  |
| 286 | 4 | 3 | -1.050000 | -14.488462728 | 1.091158613  | 3.353842278  | 1 | 0 | 0 | # | ob  |
| 287 | 4 | 3 | -1.050000 | -11.914914866 | 1.098365238  | 7.587875661  | 1 | 0 | 0 | # | ob  |
| 288 | 4 | 3 | -1.050000 | -10.932562377 | -1.019123292 | 0.681739972  | 1 | 0 | 0 | # | ob  |
| 289 | 4 | 3 | -1.050000 | -15.254665415 | -3.254366293 | 1.856176368  | 1 | 0 | 0 | # | ob  |
| 290 | 4 | 3 | -1.050000 | -12.680712729 | -3.251063569 | 6.084357725  | 1 | 0 | 0 | # | ob  |
| 291 | 4 | 5 | 2.100000  | -14.611396523 | 2.720599038  | 3.452486522  | 1 | 0 | 0 | # | st  |
| 292 | 4 | 5 | 2.100000  | -12.039370783 | 2.729580341  | 7.680379551  | 1 | 0 | 0 | # | st  |
| 293 | 4 | 5 | 2.100000  | -11.116023949 | -2.638063392 | 0.744074984  | 1 | 0 | 0 | # | st  |
| 294 | 4 | 5 | 2.100000  | -13.774666039 | -2.640760033 | 2.131278354  | 1 | 0 | 0 | # | st  |
| 295 | 4 | 5 | 2.100000  | -11.202249750 | -2.631682580 | 6.359024273  | 1 | 0 | 0 | # | st  |
| 296 | 4 | 5 | 2.100000  | -14.698121161 | 2.727049911  | 0.617961151  | 1 | 0 | 0 | # | st  |
| 297 | 4 | 5 | 2.100000  | -12.109727332 | 2.723397425  | 4.839744045  | 1 | 0 | 0 | # | st  |
| 298 | 4 | 5 | 2.100000  | -13.703981255 | -2.634695815 | 4.971778212  | 1 | 0 | 0 | # | st  |
| 299 | 4 | 1 | 1.575000  | -12.923448102 | 0.057857326  | 14.792747493 | 1 | 0 | 0 | # | ao  |
| 300 | 4 | 1 | 1.575000  | -10.336308114 | 0.047832665  | 10.569647493 | 1 | 0 | 0 | # | ao  |
| 301 | 4 | 1 | 1.575000  | -15.477924157 | 0.041014554  | 16.141210963 | 1 | 0 | 0 | # | ao  |
| 302 | 4 | 1 | 1.575000  | -12.890920700 | 0.031026926  | 11.918102305 | 1 | 0 | 0 | # | ao  |
| 303 | 4 | 2 | 0.425000  | -12.372044145 | 1.425163371  | 9.911451013  | 1 | 0 | 0 | # | ho  |
| 304 | 4 | 2 | 0.425000  | -14.942477472 | 1.523504153  | 14.180912462 | 1 | 0 | 0 | # | ho  |
| 305 | 4 | 2 | 0.425000  | -10.870735677 | -1.430790090 | 12.532201022 | 1 | 0 | 0 | # | ho  |
| 306 | 4 | 6 | 0.425000  | -13.442332585 | -1.336757339 | 16.799025190 | 1 | 0 | 0 | # | do  |
| 307 | 4 | 3 | -1.050000 | -13.514079233 | -1.017449350 | 13.358380749 | 1 | 0 | 0 | # | ob  |
| 308 | 4 | 3 | -1.050000 | -13.899116052 | -1.009534011 | 10.673429865 | 1 | 0 | 0 | # | ob  |
| 309 | 4 | 3 | -1.050000 | -11.325579590 | -1.002235530 | 14.907177115 | 1 | 0 | 0 | # | ob  |
| 310 | 4 | 3 | -1.050000 | -13.268649550 | -3.254329459 | 11.985412584 | 1 | 0 | 0 | # | ob  |
| 311 | 4 | 3 | -1.050000 | -14.881794217 | 1.108160884  | 9.130033991  | 1 | 0 | 0 | # | ob  |
| 312 | 4 | 3 | -1.050000 | -12.300224505 | 1.106315515  | 13.352451743 | 1 | 0 | 0 | # | ob  |
| 313 | 4 | 3 | -1.050000 | -13.132874866 | 3.339943172  | 12.176747445 | 1 | 0 | 0 | # | ob  |
| 314 | 4 | 3 | -1.050000 | -10.559457334 | 3.343459909  | 16.405069793 | 1 | 0 | 0 | # | ob  |
| 315 | 4 | 3 | -1.050000 | -15.129800490 | 3.342745271  | 10.506543562 | 1 | 0 | 0 | # | ob  |
| 316 | 4 | 3 | -1.050000 | -12.545240482 | 3.343022387  | 14.725300930 | 1 | 0 | 0 | # | ob  |
| 317 | 4 | 4 | -0.950000 | -14.514582553 | 1.030057382  | 14.905911812 | 1 | 0 | 0 | # | oh  |
| 318 | 4 | 4 | -0.950000 | -11.929329560 | 1.017364731  | 10.678860000 | 1 | 0 | 0 | # | oh  |
| 319 | 4 | 3 | -1.050000 | -13.119409054 | 3.066493209  | 8.867196118  | 1 | 0 | 0 | # | ob  |
| 320 | 4 | 3 | -1.050000 | -10.525124007 | 3.050340270  | 13.098538892 | 1 | 0 | 0 | # | ob  |
| 321 | 4 | 7 | -0.950000 | -13.885034277 | -0.928489933 | 16.031829270 | 1 | 0 | 0 | # | oho |
| 322 | 4 | 3 | -1.050000 | -15.288448515 | -2.961853389 | 13.612516698 | 1 | 0 | 0 | # | ob  |
| 323 | 4 | 4 | -0.950000 | -11.299423532 | -0.940763219 | 11.805359607 | 1 | 0 | 0 | # | oh  |
| 324 | 4 | 3 | -1.050000 | -12.694730266 | -2.977677046 | 9.393964434  | 1 | 0 | 0 | # | ob  |
| 325 | 4 | 3 | -1.050000 | -14.488462728 | 1.091158613  | 11.803442278 | 1 | 0 | 0 | # | ob  |
| 326 | 4 | 3 | -1.050000 | -11.914914866 | 1.098365238  | 16.037475661 | 1 | 0 | 0 | # | ob  |
| 327 | 4 | 3 | -1.050000 | -10.932562377 | -1.019123292 | 9.131339972  | 1 | 0 | 0 | # | ob  |
| 328 | 4 | 3 | -1.050000 | -15.254665415 | -3.254366293 | 10.305776368 | 1 | 0 | 0 | # | ob  |
| 329 | 4 | 3 | -1.050000 | -12.680712729 | -3.251063569 | 14.533957725 | 1 | 0 | 0 | # | ob  |
| 330 | 4 | 5 | 2.100000  | -14.611396523 | 2.720599038  | 11.902086522 | 1 | 0 | 0 | # | st  |
| 331 | 4 | 5 | 2.100000  | -12.039370783 | 2.729580341  | 16.129979551 | 1 | 0 | 0 | # | st  |
| 332 | 4 | 5 | 2.100000  | -11.116023949 | -2.638063392 | 9.193674984  | 1 | 0 | 0 | # | st  |

|     |   |   |           |               |              |              |   |   |   |   |     |
|-----|---|---|-----------|---------------|--------------|--------------|---|---|---|---|-----|
| 333 | 4 | 5 | 2.100000  | -13.774666039 | -2.640760033 | 10.580878354 | 1 | 0 | 0 | # | st  |
| 334 | 4 | 5 | 2.100000  | -11.202249750 | -2.631682580 | 14.808624273 | 1 | 0 | 0 | # | st  |
| 335 | 4 | 5 | 2.100000  | -14.698121161 | 2.727049911  | 9.067561151  | 1 | 0 | 0 | # | st  |
| 336 | 4 | 5 | 2.100000  | -12.109727332 | 2.723397425  | 13.289344045 | 1 | 0 | 0 | # | st  |
| 337 | 4 | 5 | 2.100000  | -13.703981255 | -2.634695815 | 13.421378212 | 1 | 0 | 0 | # | st  |
| 338 | 4 | 3 | -1.050000 | -14.881794217 | 1.108160884  | 17.579633991 | 1 | 0 | 0 | # | ob  |
| 339 | 4 | 8 | -0.950000 | -15.129800490 | 3.342745271  | 18.956143562 | 1 | 0 | 0 | # | oht |
| 340 | 4 | 3 | -1.050000 | -13.119409054 | 3.066493209  | 17.316796118 | 1 | 0 | 0 | # | ob  |
| 341 | 4 | 5 | 2.100000  | -14.698121161 | 2.727049911  | 17.517161151 | 1 | 0 | 0 | # | st  |
| 342 | 4 | 8 | -0.950000 | -10.642348817 | -2.634071151 | 16.634714390 | 1 | 0 | 0 | # | oht |
| 343 | 4 | 6 | 0.425000  | -15.052961041 | 3.250098365  | 20.059598264 | 1 | 0 | 0 | # | do  |
| 344 | 4 | 6 | 0.425000  | -11.030566564 | -2.533686233 | 17.669755394 | 1 | 0 | 0 | # | do  |
| 345 | 5 | 1 | 1.575000  | -7.760648102  | 0.057857326  | 6.343147493  | 1 | 0 | 0 | # | ao  |
| 346 | 5 | 1 | 1.575000  | -5.173508114  | 0.047832665  | 2.120047493  | 1 | 0 | 0 | # | ao  |
| 347 | 5 | 1 | 1.575000  | -10.315124157 | 0.041014554  | 7.691610963  | 1 | 0 | 0 | # | ao  |
| 348 | 5 | 1 | 1.575000  | -7.728120700  | 0.031026926  | 3.468502305  | 1 | 0 | 0 | # | ao  |
| 349 | 5 | 2 | 0.425000  | -7.209244145  | 1.425163371  | 1.461851013  | 1 | 0 | 0 | # | ho  |
| 350 | 5 | 2 | 0.425000  | -9.779677472  | 1.523504153  | 5.731312462  | 1 | 0 | 0 | # | ho  |
| 351 | 5 | 2 | 0.425000  | -5.707935677  | -1.430790090 | 4.082601022  | 1 | 0 | 0 | # | ho  |
| 352 | 5 | 2 | 0.425000  | -8.279532585  | -1.336757339 | 8.349425190  | 1 | 0 | 0 | # | ho  |
| 353 | 5 | 3 | -1.050000 | -8.351279233  | -1.017449350 | 4.908780749  | 1 | 0 | 0 | # | ob  |
| 354 | 5 | 3 | -1.050000 | -8.736316052  | -1.009534011 | 2.223829865  | 1 | 0 | 0 | # | ob  |
| 355 | 5 | 3 | -1.050000 | -6.162779590  | -1.002235530 | 6.457577115  | 1 | 0 | 0 | # | ob  |
| 356 | 5 | 3 | -1.050000 | -8.105849550  | -3.254329459 | 3.535812584  | 1 | 0 | 0 | # | ob  |
| 357 | 5 | 3 | -1.050000 | -5.521256058  | -3.253528090 | 7.754751701  | 1 | 0 | 0 | # | ob  |
| 358 | 5 | 3 | -1.050000 | -9.718994217  | 1.108160884  | 0.680433991  | 1 | 0 | 0 | # | ob  |
| 359 | 5 | 3 | -1.050000 | -7.137424505  | 1.106315515  | 4.902851743  | 1 | 0 | 0 | # | ob  |
| 360 | 5 | 3 | -1.050000 | -7.970074866  | 3.339943172  | 3.727147445  | 1 | 0 | 0 | # | ob  |
| 361 | 5 | 3 | -1.050000 | -5.396657334  | 3.343459909  | 7.955469793  | 1 | 0 | 0 | # | ob  |
| 362 | 5 | 3 | -1.050000 | -9.967000490  | 3.342745271  | 2.056943562  | 1 | 0 | 0 | # | ob  |
| 363 | 5 | 3 | -1.050000 | -7.382440482  | 3.343022387  | 6.275700930  | 1 | 0 | 0 | # | ob  |
| 364 | 5 | 4 | -0.950000 | -9.351782553  | 1.030057382  | 6.456311812  | 1 | 0 | 0 | # | oh  |
| 365 | 5 | 4 | -0.950000 | -6.766529560  | 1.017364731  | 2.229260000  | 1 | 0 | 0 | # | oh  |
| 366 | 5 | 3 | -1.050000 | -7.956609054  | 3.066493209  | 0.417596118  | 1 | 0 | 0 | # | ob  |
| 367 | 5 | 3 | -1.050000 | -5.362324007  | 3.050340270  | 4.648938892  | 1 | 0 | 0 | # | ob  |
| 368 | 5 | 4 | -0.950000 | -8.722234277  | -0.928489933 | 7.582229270  | 1 | 0 | 0 | # | oh  |
| 369 | 5 | 3 | -1.050000 | -10.125648515 | -2.961853389 | 5.162916698  | 1 | 0 | 0 | # | ob  |
| 370 | 5 | 4 | -0.950000 | -6.136623532  | -0.940763219 | 3.355759607  | 1 | 0 | 0 | # | oh  |
| 371 | 5 | 3 | -1.050000 | -7.531930266  | -2.977677046 | 0.944364434  | 1 | 0 | 0 | # | ob  |
| 372 | 5 | 3 | -1.050000 | -9.325662728  | 1.091158613  | 3.353842278  | 1 | 0 | 0 | # | ob  |
| 373 | 5 | 3 | -1.050000 | -6.752114866  | 1.098365238  | 7.587875661  | 1 | 0 | 0 | # | ob  |
| 374 | 5 | 3 | -1.050000 | -5.769762377  | -1.019123292 | 0.681739972  | 1 | 0 | 0 | # | ob  |
| 375 | 5 | 3 | -1.050000 | -10.091865415 | -3.254366293 | 1.856176368  | 1 | 0 | 0 | # | ob  |
| 376 | 5 | 3 | -1.050000 | -7.517912729  | -3.251063569 | 6.084357725  | 1 | 0 | 0 | # | ob  |
| 377 | 5 | 2 | 1.000000  | -9.448596523  | 2.720599038  | 3.452486522  | 1 | 0 | 0 | # | st  |
| 378 | 5 | 2 | 1.000000  | -6.876570783  | 2.729580341  | 7.680379551  | 1 | 0 | 0 | # | st  |
| 379 | 5 | 2 | 1.000000  | -5.953223949  | -2.638063392 | 0.744074984  | 1 | 0 | 0 | # | st  |
| 380 | 5 | 2 | 1.000000  | -8.611866039  | -2.640760033 | 2.131278354  | 1 | 0 | 0 | # | st  |
| 381 | 5 | 2 | 1.000000  | -6.039449750  | -2.631682580 | 6.359024273  | 1 | 0 | 0 | # | st  |
| 382 | 5 | 2 | 1.000000  | -9.535321161  | 2.727049911  | 0.617961151  | 1 | 0 | 0 | # | st  |
| 383 | 5 | 2 | 1.000000  | -6.946927332  | 2.723397425  | 4.839744045  | 1 | 0 | 0 | # | st  |
| 384 | 5 | 2 | 1.000000  | -8.541181255  | -2.634695815 | 4.971778212  | 1 | 0 | 0 | # | st  |
| 385 | 5 | 1 | 1.575000  | -7.760648102  | 0.057857326  | 14.792747493 | 1 | 0 | 0 | # | ao  |
| 386 | 5 | 1 | 1.575000  | -5.173508114  | 0.047832665  | 10.569647493 | 1 | 0 | 0 | # | ao  |
| 387 | 5 | 1 | 1.575000  | -10.315124157 | 0.041014554  | 16.141210963 | 1 | 0 | 0 | # | ao  |
| 388 | 5 | 1 | 1.575000  | -7.728120700  | 0.031026926  | 11.918102305 | 1 | 0 | 0 | # | ao  |
| 389 | 5 | 2 | 0.425000  | -7.209244145  | 1.425163371  | 9.911451013  | 1 | 0 | 0 | # | ho  |
| 390 | 5 | 2 | 0.425000  | -9.779677472  | 1.523504153  | 14.180912462 | 1 | 0 | 0 | # | ho  |
| 391 | 5 | 2 | 0.425000  | -5.707935677  | -1.430790090 | 12.532201022 | 1 | 0 | 0 | # | ho  |
| 392 | 5 | 6 | 0.425000  | -8.279532585  | -1.336757339 | 16.799025190 | 1 | 0 | 0 | # | do  |
| 393 | 5 | 3 | -1.050000 | -8.351279233  | -1.017449350 | 13.358380749 | 1 | 0 | 0 | # | ob  |
| 394 | 5 | 3 | -1.050000 | -8.736316052  | -1.009534011 | 10.673429865 | 1 | 0 | 0 | # | ob  |
| 395 | 5 | 3 | -1.050000 | -6.162779590  | -1.002235530 | 14.907177115 | 1 | 0 | 0 | # | ob  |
| 396 | 5 | 3 | -1.050000 | -8.105849550  | -3.254329459 | 11.985412584 | 1 | 0 | 0 | # | ob  |
| 397 | 5 | 3 | -1.050000 | -9.718994217  | 1.108160884  | 9.130033991  | 1 | 0 | 0 | # | ob  |
| 398 | 5 | 3 | -1.050000 | -7.137424505  | 1.106315515  | 13.352451743 | 1 | 0 | 0 | # | ob  |
| 399 | 5 | 3 | -1.050000 | -7.970074866  | 3.339943172  | 12.176774445 | 1 | 0 | 0 | # | ob  |
| 400 | 5 | 3 | -1.050000 | -5.396657334  | 3.343459909  | 16.405069793 | 1 | 0 | 0 | # | ob  |
| 401 | 5 | 3 | -1.050000 | -9.967000490  | 3.342745271  | 10.506543562 | 1 | 0 | 0 | # | ob  |
| 402 | 5 | 3 | -1.050000 | -7.382440482  | 3.343022387  | 14.725300930 | 1 | 0 | 0 | # | ob  |
| 403 | 5 | 4 | -0.950000 | -9.351782553  | 1.030057382  | 14.905911812 | 1 | 0 | 0 | # | oh  |
| 404 | 5 | 4 | -0.950000 | -6.766529560  | 1.017364731  | 10.678860000 | 1 | 0 | 0 | # | oh  |
| 405 | 5 | 3 | -1.050000 | -7.956609054  | 3.066493209  | 8.867196118  | 1 | 0 | 0 | # | ob  |
| 406 | 5 | 3 | -1.050000 | -5.362324007  | 3.050340270  | 13.098538892 | 1 | 0 | 0 | # | ob  |
| 407 | 5 | 7 | -0.950000 | -8.722234277  | -0.928489933 | 16.031829270 | 1 | 0 | 0 | # | oht |
| 408 | 5 | 3 | -1.050000 | -10.125648515 | -2.961853389 | 13.612516698 | 1 | 0 | 0 | # | ob  |
| 409 | 5 | 4 | -0.950000 | -6.136623532  | -0.940763219 | 11.805359607 | 1 | 0 | 0 | # | oh  |
| 410 | 5 | 3 | -1.050000 | -7.531930266  | -2.977677046 | 9.393964434  | 1 | 0 | 0 | # | ob  |
| 411 | 5 | 3 | -1.050000 | -9.325662728  | 1.091158613  | 11.803442278 | 1 | 0 | 0 | # | ob  |
| 412 | 5 | 3 | -1.050000 | -6.752114866  | 1.098365238  | 16.037475661 | 1 | 0 | 0 | # | ob  |
| 413 | 5 | 3 | -1.050000 | -5.769762377  | -1.019123292 | 9.131339972  | 1 | 0 | 0 | # | ob  |
| 414 | 5 | 3 | -1.050000 | -10.091865415 | -3.254366293 | 10.305776368 | 1 | 0 | 0 | # | ob  |
| 415 | 5 | 3 | -1.050000 | -7.517912729  | -3.251063569 | 14.533957725 | 1 | 0 | 0 | # | ob  |
| 416 | 5 | 2 | 1.000000  | -9.448596523  | 2.720599038  | 11.902086522 | 1 | 0 | 0 | # | st  |
| 417 | 5 | 2 | 1.000000  | -6.876570783  | 2.729580341  | 16.129979551 | 1 | 0 | 0 | # | st  |
| 418 | 5 | 2 | 1.000000  | -5.953223949  | -2.638063392 | 9.193674984  | 1 | 0 | 0 | # | st  |
| 419 | 5 | 2 | 1.000000  | -8.611866039  | -2.640760033 | 10.580878354 | 1 | 0 | 0 | # | st  |
| 420 | 5 | 2 | 1.000000  | -6.039449750  | -2.631682580 | 14.808624273 | 1 | 0 | 0 | # | st  |
| 421 | 5 | 2 | 1.000000  | -9.535321161  | 2.727049911  | 9.067561151  | 1 | 0 | 0 | # | st  |
| 422 | 5 | 2 | 1.000000  | -6.946927332  | 2.723397425  | 13.289344045 | 1 | 0 | 0 | # | st  |
| 423 | 5 | 2 | 1.000000  | -8.541181255  | -2.634695815 | 13.421378212 | 1 | 0 | 0 | # | st  |
| 424 | 5 | 3 | -1.050000 | -9.718994217  | 1.108160884  | 17.579633991 | 1 | 0 | 0 | # | ob  |
| 425 | 5 | 8 | -0.950000 | -9.967000490  | 3.342745271  | 18.956143562 | 1 | 0 | 0 | # | oht |

|     |   |   |           |              |              |              |   |   |   |   |     |
|-----|---|---|-----------|--------------|--------------|--------------|---|---|---|---|-----|
| 426 | 5 | 3 | -1.050000 | -7.956609054 | 3.066493209  | 17.316796118 | 1 | 0 | 0 | # | ob  |
| 427 | 5 | 2 | 1.000000  | -9.535321161 | 2.727049911  | 17.517161151 | 1 | 0 | 0 | # | st  |
| 428 | 5 | 8 | -0.950000 | -5.479548817 | -2.634071151 | 16.634714390 | 1 | 0 | 0 | # | oht |
| 429 | 5 | 6 | 0.425000  | -9.890161041 | 3.250098365  | 20.059598264 | 1 | 0 | 0 | # | do  |
| 430 | 5 | 6 | 0.425000  | -5.867766564 | -2.533686233 | 17.669755394 | 1 | 0 | 0 | # | do  |
| 431 | 6 | 1 | 1.575000  | -2.597848102 | 0.057857326  | 6.343147493  | 1 | 0 | 0 | # | ao  |
| 432 | 6 | 1 | 1.575000  | -0.010708114 | 0.047832665  | 2.120047493  | 1 | 0 | 0 | # | ao  |
| 433 | 6 | 1 | 1.575000  | -5.152324157 | 0.041014554  | 7.691610963  | 1 | 0 | 0 | # | ao  |
| 434 | 6 | 1 | 1.575000  | -2.565320700 | 0.031026926  | 3.468502305  | 1 | 0 | 0 | # | ao  |
| 435 | 6 | 2 | 0.425000  | -2.046444145 | 1.425163371  | 1.461851013  | 1 | 0 | 0 | # | ho  |
| 436 | 6 | 2 | 0.425000  | -4.616877472 | 1.523504153  | 5.731312462  | 1 | 0 | 0 | # | ho  |
| 437 | 6 | 2 | 0.425000  | -0.545135677 | -1.430790090 | 4.082601022  | 1 | 0 | 0 | # | ho  |
| 438 | 6 | 2 | 0.425000  | -3.116732585 | -1.336757339 | 8.349425190  | 1 | 0 | 0 | # | ho  |
| 439 | 6 | 3 | -1.050000 | -3.188479233 | -1.017449350 | 4.908780749  | 1 | 0 | 0 | # | ob  |
| 440 | 6 | 3 | -1.050000 | -3.573516052 | -1.009534011 | 2.223829865  | 1 | 0 | 0 | # | ob  |
| 441 | 6 | 3 | -1.050000 | -0.999979590 | -1.002235530 | 6.457577115  | 1 | 0 | 0 | # | ob  |
| 442 | 6 | 3 | -1.050000 | -2.943049550 | -3.254329459 | 3.535812584  | 1 | 0 | 0 | # | ob  |
| 443 | 6 | 3 | -1.050000 | -0.358456058 | -3.253528090 | 7.754751701  | 1 | 0 | 0 | # | ob  |
| 444 | 6 | 3 | -1.050000 | -4.556194217 | 1.108160884  | 0.680433991  | 1 | 0 | 0 | # | ob  |
| 445 | 6 | 3 | -1.050000 | -1.974624505 | 1.106315515  | 4.902851743  | 1 | 0 | 0 | # | ob  |
| 446 | 6 | 3 | -1.050000 | -2.807274866 | 3.339943172  | 3.727147445  | 1 | 0 | 0 | # | ob  |
| 447 | 6 | 3 | -1.050000 | -0.233857334 | 3.343459909  | 7.955469793  | 1 | 0 | 0 | # | ob  |
| 448 | 6 | 3 | -1.050000 | -4.804200490 | 3.342745271  | 2.056943562  | 1 | 0 | 0 | # | ob  |
| 449 | 6 | 3 | -1.050000 | -2.219640482 | 3.343022387  | 6.275700930  | 1 | 0 | 0 | # | ob  |
| 450 | 6 | 4 | -0.950000 | -4.188982553 | 1.030057382  | 6.456311812  | 1 | 0 | 0 | # | oh  |
| 451 | 6 | 4 | -0.950000 | -1.603729560 | 1.017364731  | 2.229260000  | 1 | 0 | 0 | # | oh  |
| 452 | 6 | 3 | -1.050000 | -2.793809054 | 3.066493209  | 0.417596118  | 1 | 0 | 0 | # | ob  |
| 453 | 6 | 3 | -1.050000 | -0.199524007 | 3.050340270  | 4.648938892  | 1 | 0 | 0 | # | ob  |
| 454 | 6 | 4 | -0.950000 | -3.559434277 | -0.928489933 | 7.582229270  | 1 | 0 | 0 | # | oh  |
| 455 | 6 | 3 | -1.050000 | -4.962848515 | -2.961853389 | 5.162916698  | 1 | 0 | 0 | # | ob  |
| 456 | 6 | 4 | -0.950000 | -0.973823532 | -0.940763219 | 3.355759607  | 1 | 0 | 0 | # | oh  |
| 457 | 6 | 3 | -1.050000 | -2.369130266 | -2.977677046 | 0.944364434  | 1 | 0 | 0 | # | ob  |
| 458 | 6 | 3 | -1.050000 | -4.162862728 | 1.091158613  | 3.353842278  | 1 | 0 | 0 | # | ob  |
| 459 | 6 | 3 | -1.050000 | -1.589314866 | 1.098365238  | 7.587875661  | 1 | 0 | 0 | # | ob  |
| 460 | 6 | 3 | -1.050000 | -0.606962377 | -1.019123292 | 0.681739972  | 1 | 0 | 0 | # | ob  |
| 461 | 6 | 3 | -1.050000 | -4.929065415 | -3.254366293 | 1.856176368  | 1 | 0 | 0 | # | ob  |
| 462 | 6 | 3 | -1.050000 | -2.355112729 | -3.251063569 | 6.084357725  | 1 | 0 | 0 | # | ob  |
| 463 | 6 | 5 | 2.100000  | -4.285796523 | 2.720599038  | 3.452486522  | 1 | 0 | 0 | # | st  |
| 464 | 6 | 5 | 2.100000  | -1.713770783 | 2.729580341  | 7.680379551  | 1 | 0 | 0 | # | st  |
| 465 | 6 | 5 | 2.100000  | -0.790423949 | -2.638063392 | 0.744074984  | 1 | 0 | 0 | # | st  |
| 466 | 6 | 5 | 2.100000  | -3.449066039 | -2.640760033 | 2.131278354  | 1 | 0 | 0 | # | st  |
| 467 | 6 | 5 | 2.100000  | -0.876649750 | -2.631682580 | 6.359024273  | 1 | 0 | 0 | # | st  |
| 468 | 6 | 5 | 2.100000  | -4.372521161 | 2.727049911  | 0.617961151  | 1 | 0 | 0 | # | st  |
| 469 | 6 | 5 | 2.100000  | -1.784127332 | 2.723397425  | 4.839744045  | 1 | 0 | 0 | # | st  |
| 470 | 6 | 5 | 2.100000  | -3.378381255 | -2.634695815 | 4.971778212  | 1 | 0 | 0 | # | st  |
| 471 | 6 | 1 | 1.575000  | -2.597848102 | 0.057857326  | 14.792747493 | 1 | 0 | 0 | # | ao  |
| 472 | 6 | 1 | 1.575000  | -0.010708114 | 0.047832665  | 10.569647493 | 1 | 0 | 0 | # | ao  |
| 473 | 6 | 1 | 1.575000  | -5.152324157 | 0.041014554  | 16.141210963 | 1 | 0 | 0 | # | ao  |
| 474 | 6 | 1 | 1.575000  | -2.565320700 | 0.031026926  | 11.918102305 | 1 | 0 | 0 | # | ao  |
| 475 | 6 | 2 | 0.425000  | -2.046444145 | 1.425163371  | 9.911451013  | 1 | 0 | 0 | # | ho  |
| 476 | 6 | 2 | 0.425000  | -4.616877472 | 1.523504153  | 14.180912462 | 1 | 0 | 0 | # | ho  |
| 477 | 6 | 2 | 0.425000  | -0.545135677 | -1.430790090 | 12.532201022 | 1 | 0 | 0 | # | ho  |
| 478 | 6 | 6 | 0.425000  | -3.116732585 | -1.336757339 | 16.799025190 | 1 | 0 | 0 | # | do  |
| 479 | 6 | 3 | -1.050000 | -3.188479233 | -1.017449350 | 13.358380749 | 1 | 0 | 0 | # | ob  |
| 480 | 6 | 3 | -1.050000 | -3.573516052 | -1.009534011 | 10.673429865 | 1 | 0 | 0 | # | ob  |
| 481 | 6 | 3 | -1.050000 | -0.999979590 | -1.002235530 | 14.907177115 | 1 | 0 | 0 | # | ob  |
| 482 | 6 | 3 | -1.050000 | -2.943049550 | -3.254329459 | 11.985412584 | 1 | 0 | 0 | # | ob  |
| 483 | 6 | 3 | -1.050000 | -4.556194217 | 1.108160884  | 9.130033991  | 1 | 0 | 0 | # | ob  |
| 484 | 6 | 3 | -1.050000 | -1.974624505 | 1.106315515  | 13.352451743 | 1 | 0 | 0 | # | ob  |
| 485 | 6 | 3 | -1.050000 | -2.807274866 | 3.339943172  | 12.176747445 | 1 | 0 | 0 | # | ob  |
| 486 | 6 | 3 | -1.050000 | -0.233857334 | 3.343459909  | 16.405069793 | 1 | 0 | 0 | # | ob  |
| 487 | 6 | 3 | -1.050000 | -4.804200490 | 3.342745271  | 10.506543562 | 1 | 0 | 0 | # | ob  |
| 488 | 6 | 3 | -1.050000 | -2.219640482 | 3.343022387  | 14.725300930 | 1 | 0 | 0 | # | ob  |
| 489 | 6 | 4 | -0.950000 | -4.188982553 | 1.030057382  | 14.905911812 | 1 | 0 | 0 | # | oh  |
| 490 | 6 | 4 | -0.950000 | -1.603729560 | 1.017364731  | 10.678860000 | 1 | 0 | 0 | # | oh  |
| 491 | 6 | 3 | -1.050000 | -2.793809054 | 3.066493209  | 8.867196118  | 1 | 0 | 0 | # | ob  |
| 492 | 6 | 3 | -1.050000 | -0.199524007 | 3.050340270  | 13.098538892 | 1 | 0 | 0 | # | ob  |
| 493 | 6 | 7 | -0.950000 | -3.559434277 | -0.928489933 | 16.031829270 | 1 | 0 | 0 | # | oho |
| 494 | 6 | 3 | -1.050000 | -4.962848515 | -2.961853389 | 13.612516698 | 1 | 0 | 0 | # | ob  |
| 495 | 6 | 4 | -0.950000 | -0.973823532 | -0.940763219 | 11.805359607 | 1 | 0 | 0 | # | oh  |
| 496 | 6 | 3 | -1.050000 | -2.369130266 | -2.977677046 | 9.393964434  | 1 | 0 | 0 | # | ob  |
| 497 | 6 | 3 | -1.050000 | -4.162862728 | 1.091158613  | 11.803442278 | 1 | 0 | 0 | # | ob  |
| 498 | 6 | 3 | -1.050000 | -1.589314866 | 1.098365238  | 16.037475661 | 1 | 0 | 0 | # | ob  |
| 499 | 6 | 3 | -1.050000 | -0.606962377 | -1.019123292 | 9.131339972  | 1 | 0 | 0 | # | ob  |
| 500 | 6 | 3 | -1.050000 | -4.929065415 | -3.254366293 | 10.305776368 | 1 | 0 | 0 | # | ob  |
| 501 | 6 | 3 | -1.050000 | -2.355112729 | -3.251063569 | 14.533957725 | 1 | 0 | 0 | # | ob  |
| 502 | 6 | 5 | 2.100000  | -4.285796523 | 2.720599038  | 11.902086522 | 1 | 0 | 0 | # | st  |
| 503 | 6 | 5 | 2.100000  | -1.713770783 | 2.729580341  | 16.129979551 | 1 | 0 | 0 | # | st  |
| 504 | 6 | 5 | 2.100000  | -0.790423949 | -2.638063392 | 9.193674984  | 1 | 0 | 0 | # | st  |
| 505 | 6 | 5 | 2.100000  | -3.449066039 | -2.640760033 | 10.580878354 | 1 | 0 | 0 | # | st  |
| 506 | 6 | 5 | 2.100000  | -0.876649750 | -2.631682580 | 14.808624273 | 1 | 0 | 0 | # | st  |
| 507 | 6 | 5 | 2.100000  | -4.372521161 | 2.727049911  | 9.067561151  | 1 | 0 | 0 | # | st  |
| 508 | 6 | 5 | 2.100000  | -1.784127332 | 2.723397425  | 13.289344045 | 1 | 0 | 0 | # | st  |
| 509 | 6 | 5 | 2.100000  | -3.378381255 | -2.634695815 | 13.421378212 | 1 | 0 | 0 | # | st  |
| 510 | 6 | 3 | -1.050000 | -4.556194217 | 1.108160884  | 17.579633991 | 1 | 0 | 0 | # | ob  |
| 511 | 6 | 8 | -0.950000 | -4.804200490 | 3.342745271  | 18.956143562 | 1 | 0 | 0 | # | oht |
| 512 | 6 | 3 | -1.050000 | -2.793809054 | 3.066493209  | 17.316796118 | 1 | 0 | 0 | # | ob  |
| 513 | 6 | 5 | 2.100000  | -4.372521161 | 2.727049911  | 17.517161151 | 1 | 0 | 0 | # | st  |
| 514 | 6 | 8 | -0.950000 | -0.316748817 | -2.634071151 | 16.634714390 | 1 | 0 | 0 | # | oht |
| 515 | 6 | 6 | 0.425000  | -4.727361041 | 3.250098365  | 20.059598264 | 1 | 0 | 0 | # | do  |
| 516 | 6 | 6 | 0.425000  | -0.704966564 | -2.533686233 | 17.669755394 | 1 | 0 | 0 | # | do  |
| 517 | 7 | 1 | 1.575000  | 2.564951898  | 9.441957326  | 6.343147493  | 0 | 0 | 0 | # | ao  |
| 518 | 7 | 1 | 1.575000  | 5.152091886  | 9.431932665  | 2.120047493  | 0 | 0 | 0 | # | ao  |

|     |   |   |           |              |              |              |   |   |   |   |     |
|-----|---|---|-----------|--------------|--------------|--------------|---|---|---|---|-----|
| 519 | 7 | 1 | 1.575000  | 0.010475843  | 9.425114554  | 7.691610963  | 0 | 0 | 0 | # | ao  |
| 520 | 7 | 1 | 1.575000  | 2.597479300  | 9.415126926  | 3.468502305  | 0 | 0 | 0 | # | ao  |
| 521 | 7 | 2 | 0.425000  | 3.116355855  | 10.809263371 | 1.461851013  | 0 | 0 | 0 | # | ho  |
| 522 | 7 | 2 | 0.425000  | 0.545922528  | 10.907604153 | 5.731312462  | 0 | 0 | 0 | # | ho  |
| 523 | 7 | 2 | 0.425000  | 4.617664323  | 7.953309910  | 4.082601022  | 0 | 0 | 0 | # | ho  |
| 524 | 7 | 2 | 0.425000  | 2.040667415  | 8.047342661  | 8.349425190  | 0 | 0 | 0 | # | ho  |
| 525 | 7 | 3 | -1.050000 | 1.974320767  | 8.366650650  | 4.908780749  | 0 | 0 | 0 | # | ob  |
| 526 | 7 | 3 | -1.050000 | 1.589283948  | 8.374565989  | 2.223829865  | 0 | 0 | 0 | # | ob  |
| 527 | 7 | 3 | -1.050000 | 4.162820410  | 8.381864470  | 6.457577115  | 0 | 0 | 0 | # | ob  |
| 528 | 7 | 3 | -1.050000 | 2.219750450  | 6.129770541  | 3.535812584  | 0 | 0 | 0 | # | ob  |
| 529 | 7 | 3 | -1.050000 | 4.804343942  | 6.130571910  | 7.754751701  | 0 | 0 | 0 | # | ob  |
| 530 | 7 | 3 | -1.050000 | 0.606605783  | 10.492260884 | 0.680433991  | 0 | 0 | 0 | # | ob  |
| 531 | 7 | 3 | -1.050000 | 3.188175495  | 10.490415515 | 4.902851743  | 0 | 0 | 0 | # | ob  |
| 532 | 7 | 3 | -1.050000 | 2.355525134  | 12.724043172 | 3.727147445  | 0 | 0 | 0 | # | ob  |
| 533 | 7 | 3 | -1.050000 | 4.928942666  | 12.727559909 | 7.955469793  | 0 | 0 | 0 | # | ob  |
| 534 | 7 | 3 | -1.050000 | 0.358599510  | 12.726845271 | 2.056943562  | 0 | 0 | 0 | # | ob  |
| 535 | 7 | 3 | -1.050000 | 2.943159518  | 12.727122387 | 6.275700930  | 0 | 0 | 0 | # | ob  |
| 536 | 7 | 4 | -0.950000 | 0.973817447  | 10.414157382 | 6.456311812  | 0 | 0 | 0 | # | oh  |
| 537 | 7 | 4 | -0.950000 | 3.559070440  | 10.401464731 | 2.229260000  | 0 | 0 | 0 | # | oh  |
| 538 | 7 | 3 | -1.050000 | 2.368990946  | 12.450593209 | 0.417596118  | 0 | 0 | 0 | # | ob  |
| 539 | 7 | 3 | -1.050000 | 4.963275993  | 12.434440270 | 4.648938892  | 0 | 0 | 0 | # | ob  |
| 540 | 7 | 4 | -0.950000 | 1.603365723  | 8.455610067  | 7.582229270  | 0 | 0 | 0 | # | oh  |
| 541 | 7 | 3 | -1.050000 | 0.199951485  | 6.422246611  | 5.162916698  | 0 | 0 | 0 | # | ob  |
| 542 | 7 | 4 | -0.950000 | 4.188976468  | 8.443336781  | 3.355759607  | 0 | 0 | 0 | # | oh  |
| 543 | 7 | 3 | -1.050000 | 2.793669734  | 6.406422954  | 0.944364434  | 0 | 0 | 0 | # | ob  |
| 544 | 7 | 3 | -1.050000 | 0.999937272  | 10.475258613 | 3.353842278  | 0 | 0 | 0 | # | ob  |
| 545 | 7 | 3 | -1.050000 | 3.573485134  | 10.482465238 | 7.587875661  | 0 | 0 | 0 | # | ob  |
| 546 | 7 | 3 | -1.050000 | 4.555837623  | 8.364976708  | 0.681739972  | 0 | 0 | 0 | # | ob  |
| 547 | 7 | 3 | -1.050000 | 0.233734585  | 6.129733707  | 1.856176368  | 0 | 0 | 0 | # | ob  |
| 548 | 7 | 3 | -1.050000 | 2.807687271  | 6.133036431  | 6.084357725  | 0 | 0 | 0 | # | ob  |
| 549 | 7 | 5 | 2.100000  | 0.877003477  | 12.104699038 | 3.452486522  | 0 | 0 | 0 | # | st  |
| 550 | 7 | 5 | 2.100000  | 3.449029217  | 12.113680341 | 7.680379551  | 0 | 0 | 0 | # | st  |
| 551 | 7 | 5 | 2.100000  | 4.372376051  | 6.746036608  | 0.744074984  | 0 | 0 | 0 | # | st  |
| 552 | 7 | 5 | 2.100000  | 1.713733961  | 6.743339967  | 2.131278354  | 0 | 0 | 0 | # | st  |
| 553 | 7 | 5 | 2.100000  | 4.286150250  | 6.752417420  | 6.359024273  | 0 | 0 | 0 | # | st  |
| 554 | 7 | 5 | 2.100000  | 0.790278839  | 12.111149911 | 0.617961151  | 0 | 0 | 0 | # | st  |
| 555 | 7 | 5 | 2.100000  | 3.378672668  | 12.107497425 | 4.839744045  | 0 | 0 | 0 | # | st  |
| 556 | 7 | 5 | 2.100000  | 1.784418745  | 6.749404185  | 4.971778212  | 0 | 0 | 0 | # | st  |
| 557 | 7 | 1 | 1.575000  | 2.564951898  | 9.441957326  | 14.792747493 | 0 | 0 | 0 | # | ao  |
| 558 | 7 | 1 | 1.575000  | 5.152091886  | 9.431932665  | 10.569647493 | 0 | 0 | 0 | # | ao  |
| 559 | 7 | 1 | 1.575000  | 0.010475843  | 9.425114554  | 16.141210963 | 0 | 0 | 0 | # | ao  |
| 560 | 7 | 1 | 1.575000  | 2.597479300  | 9.415126926  | 11.918102305 | 0 | 0 | 0 | # | ao  |
| 561 | 7 | 2 | 0.425000  | 3.116355855  | 10.809263371 | 9.911451013  | 0 | 0 | 0 | # | ho  |
| 562 | 7 | 2 | 0.425000  | 0.545922528  | 10.907604153 | 14.180912462 | 0 | 0 | 0 | # | ho  |
| 563 | 7 | 2 | 0.425000  | 4.617664323  | 7.953309910  | 12.532201022 | 0 | 0 | 0 | # | ho  |
| 564 | 7 | 6 | 0.425000  | 2.040667415  | 8.047342661  | 16.799025190 | 0 | 0 | 0 | # | do  |
| 565 | 7 | 3 | -1.050000 | 1.974320767  | 8.366650650  | 13.358380749 | 0 | 0 | 0 | # | ob  |
| 566 | 7 | 3 | -1.050000 | 1.589283948  | 8.374565989  | 10.673429865 | 0 | 0 | 0 | # | ob  |
| 567 | 7 | 3 | -1.050000 | 4.162820410  | 8.381864470  | 14.907177115 | 0 | 0 | 0 | # | ob  |
| 568 | 7 | 3 | -1.050000 | 2.219750450  | 6.129770541  | 11.985412584 | 0 | 0 | 0 | # | ob  |
| 569 | 7 | 3 | -1.050000 | 0.606605783  | 10.492260884 | 9.130033991  | 0 | 0 | 0 | # | ob  |
| 570 | 7 | 3 | -1.050000 | 3.188175495  | 10.490415515 | 13.352451743 | 0 | 0 | 0 | # | ob  |
| 571 | 7 | 3 | -1.050000 | 2.355525134  | 12.724043172 | 12.176747445 | 0 | 0 | 0 | # | ob  |
| 572 | 7 | 3 | -1.050000 | 4.928942666  | 12.727559909 | 16.405069793 | 0 | 0 | 0 | # | ob  |
| 573 | 7 | 3 | -1.050000 | 0.358599510  | 12.726845271 | 10.506543562 | 0 | 0 | 0 | # | ob  |
| 574 | 7 | 3 | -1.050000 | 2.943159518  | 12.727122387 | 14.725300930 | 0 | 0 | 0 | # | ob  |
| 575 | 7 | 4 | -0.950000 | 0.973817447  | 10.414157382 | 14.905911812 | 0 | 0 | 0 | # | oh  |
| 576 | 7 | 4 | -0.950000 | 3.559070440  | 10.401464731 | 10.678860000 | 0 | 0 | 0 | # | oh  |
| 577 | 7 | 3 | -1.050000 | 2.368990946  | 12.450593209 | 8.867196118  | 0 | 0 | 0 | # | ob  |
| 578 | 7 | 3 | -1.050000 | 4.963275993  | 12.434440270 | 13.098538892 | 0 | 0 | 0 | # | ob  |
| 579 | 7 | 7 | -0.950000 | 1.603365723  | 8.455610067  | 16.031829270 | 0 | 0 | 0 | # | oho |
| 580 | 7 | 3 | -1.050000 | 0.199951485  | 6.422246611  | 13.612516698 | 0 | 0 | 0 | # | ob  |
| 581 | 7 | 4 | -0.950000 | 4.188976468  | 8.443336781  | 11.805359607 | 0 | 0 | 0 | # | oh  |
| 582 | 7 | 3 | -1.050000 | 2.793669734  | 6.406422954  | 9.393964434  | 0 | 0 | 0 | # | ob  |
| 583 | 7 | 3 | -1.050000 | 0.999937272  | 10.475258613 | 11.803442278 | 0 | 0 | 0 | # | ob  |
| 584 | 7 | 3 | -1.050000 | 3.573485134  | 10.482465238 | 16.037475661 | 0 | 0 | 0 | # | ob  |
| 585 | 7 | 3 | -1.050000 | 4.555837623  | 8.364976708  | 9.131339972  | 0 | 0 | 0 | # | ob  |
| 586 | 7 | 3 | -1.050000 | 0.233734585  | 6.129733707  | 10.305776368 | 0 | 0 | 0 | # | ob  |
| 587 | 7 | 3 | -1.050000 | 2.807687271  | 6.133036431  | 14.533957725 | 0 | 0 | 0 | # | ob  |
| 588 | 7 | 5 | 2.100000  | 0.877003477  | 12.104699038 | 11.902086522 | 0 | 0 | 0 | # | st  |
| 589 | 7 | 5 | 2.100000  | 3.449029217  | 12.113680341 | 16.129979551 | 0 | 0 | 0 | # | st  |
| 590 | 7 | 5 | 2.100000  | 4.372376051  | 6.746036608  | 9.193674984  | 0 | 0 | 0 | # | st  |
| 591 | 7 | 5 | 2.100000  | 1.713733961  | 6.743339967  | 10.580878354 | 0 | 0 | 0 | # | st  |
| 592 | 7 | 5 | 2.100000  | 4.286150250  | 6.752417420  | 14.808624273 | 0 | 0 | 0 | # | st  |
| 593 | 7 | 5 | 2.100000  | 0.790278839  | 12.111149911 | 9.067561151  | 0 | 0 | 0 | # | st  |
| 594 | 7 | 5 | 2.100000  | 3.378672668  | 12.107497425 | 13.289344045 | 0 | 0 | 0 | # | st  |
| 595 | 7 | 5 | 2.100000  | 1.784418745  | 6.749404185  | 13.421378212 | 0 | 0 | 0 | # | st  |
| 596 | 7 | 3 | -1.050000 | 0.606605783  | 10.492260884 | 17.579633991 | 0 | 0 | 0 | # | ob  |
| 597 | 7 | 8 | -0.950000 | 0.358599510  | 12.726845271 | 18.956143562 | 0 | 0 | 0 | # | oht |
| 598 | 7 | 3 | -1.050000 | 2.368990946  | 12.450593209 | 17.316796118 | 0 | 0 | 0 | # | ob  |
| 599 | 7 | 5 | 2.100000  | 0.790278839  | 12.111149911 | 17.517161151 | 0 | 0 | 0 | # | st  |
| 600 | 7 | 8 | -0.950000 | 4.846051183  | 6.750028849  | 16.634714390 | 0 | 0 | 0 | # | oht |
| 601 | 7 | 6 | 0.425000  | 0.435438959  | 12.634198365 | 20.059598264 | 0 | 0 | 0 | # | do  |
| 602 | 7 | 6 | 0.425000  | 4.457833436  | 6.850413767  | 17.669755394 | 0 | 0 | 0 | # | do  |
| 603 | 8 | 1 | 1.575000  | 7.727751898  | 9.441957326  | 6.343147493  | 0 | 0 | 0 | # | ao  |
| 604 | 8 | 1 | 1.575000  | 10.314891886 | 9.431932665  | 2.120047493  | 0 | 0 | 0 | # | ao  |
| 605 | 8 | 1 | 1.575000  | 5.173275843  | 9.425114554  | 7.691610963  | 0 | 0 | 0 | # | ao  |
| 606 | 8 | 1 | 1.575000  | 7.760279300  | 9.415126926  | 3.468502305  | 0 | 0 | 0 | # | ao  |
| 607 | 8 | 2 | 0.425000  | 8.279155855  | 10.809263371 | 1.461851013  | 0 | 0 | 0 | # | ho  |
| 608 | 8 | 2 | 0.425000  | 5.708722528  | 10.907604153 | 5.731312462  | 0 | 0 | 0 | # | ho  |
| 609 | 8 | 2 | 0.425000  | 9.780464323  | 7.953309910  | 4.082601022  | 0 | 0 | 0 | # | ho  |
| 610 | 8 | 2 | 0.425000  | 7.208867415  | 8.047342661  | 8.349425190  | 0 | 0 | 0 | # | ho  |
| 611 | 8 | 3 | -1.050000 | 7.137120767  | 8.366650650  | 4.908780749  | 0 | 0 | 0 | # | ob  |

|     |   |   |           |              |              |              |   |   |   |     |
|-----|---|---|-----------|--------------|--------------|--------------|---|---|---|-----|
| 612 | 8 | 3 | -1.050000 | 6.752083948  | 8.374565989  | 2.223829865  | 0 | 0 | 0 | ob  |
| 613 | 8 | 3 | -1.050000 | 9.325620410  | 8.381864470  | 6.457577115  | 0 | 0 | 0 | ob  |
| 614 | 8 | 3 | -1.050000 | 7.382550450  | 6.129770541  | 3.535812584  | 0 | 0 | 0 | ob  |
| 615 | 8 | 3 | -1.050000 | 9.967143942  | 6.130571910  | 7.754751701  | 0 | 0 | 0 | ob  |
| 616 | 8 | 3 | -1.050000 | 5.769405783  | 10.492260884 | 0.680433991  | 0 | 0 | 0 | ob  |
| 617 | 8 | 3 | -1.050000 | 8.350975495  | 10.490415515 | 4.902851743  | 0 | 0 | 0 | ob  |
| 618 | 8 | 3 | -1.050000 | 7.518325134  | 12.724043172 | 3.727147445  | 0 | 0 | 0 | ob  |
| 619 | 8 | 3 | -1.050000 | 10.091742666 | 12.727559909 | 7.955469793  | 0 | 0 | 0 | ob  |
| 620 | 8 | 3 | -1.050000 | 5.521399510  | 12.726845271 | 2.056943562  | 0 | 0 | 0 | ob  |
| 621 | 8 | 3 | -1.050000 | 8.105959518  | 12.727122387 | 6.275700930  | 0 | 0 | 0 | ob  |
| 622 | 8 | 4 | -0.950000 | 6.136617447  | 10.414157382 | 6.456311812  | 0 | 0 | 0 | oh  |
| 623 | 8 | 4 | -0.950000 | 8.721870440  | 10.401464731 | 2.229260000  | 0 | 0 | 0 | oh  |
| 624 | 8 | 3 | -1.050000 | 7.531790946  | 12.450593209 | 0.417596118  | 0 | 0 | 0 | ob  |
| 625 | 8 | 3 | -1.050000 | 10.126075993 | 12.434440270 | 4.648938892  | 0 | 0 | 0 | ob  |
| 626 | 8 | 4 | -0.950000 | 6.766165723  | 8.455610067  | 7.582229270  | 0 | 0 | 0 | oh  |
| 627 | 8 | 3 | -1.050000 | 5.362751485  | 6.422246611  | 5.162916698  | 0 | 0 | 0 | ob  |
| 628 | 8 | 4 | -0.950000 | 9.351776468  | 8.443336781  | 3.355759607  | 0 | 0 | 0 | oh  |
| 629 | 8 | 3 | -1.050000 | 7.956469734  | 6.406422954  | 0.944364434  | 0 | 0 | 0 | ob  |
| 630 | 8 | 3 | -1.050000 | 6.162737272  | 10.475258613 | 3.353842278  | 0 | 0 | 0 | ob  |
| 631 | 8 | 3 | -1.050000 | 8.736285134  | 10.482465238 | 7.587875661  | 0 | 0 | 0 | ob  |
| 632 | 8 | 3 | -1.050000 | 9.718637623  | 8.364976708  | 0.681739972  | 0 | 0 | 0 | ob  |
| 633 | 8 | 3 | -1.050000 | 5.396534585  | 6.129733707  | 1.856176368  | 0 | 0 | 0 | ob  |
| 634 | 8 | 3 | -1.050000 | 7.970487271  | 6.133036431  | 6.084357725  | 0 | 0 | 0 | ob  |
| 635 | 8 | 5 | 2.100000  | 6.039803477  | 12.104699038 | 3.452486522  | 0 | 0 | 0 | st  |
| 636 | 8 | 5 | 2.100000  | 8.611829217  | 12.113680341 | 7.680379551  | 0 | 0 | 0 | st  |
| 637 | 8 | 5 | 2.100000  | 9.535176051  | 6.746036608  | 0.744074984  | 0 | 0 | 0 | st  |
| 638 | 8 | 5 | 2.100000  | 6.876533961  | 6.743339967  | 2.131278354  | 0 | 0 | 0 | st  |
| 639 | 8 | 5 | 2.100000  | 9.448950250  | 6.752417420  | 6.359024273  | 0 | 0 | 0 | st  |
| 640 | 8 | 5 | 2.100000  | 5.953078839  | 12.111149911 | 0.617961151  | 0 | 0 | 0 | st  |
| 641 | 8 | 5 | 2.100000  | 8.541472668  | 12.107497425 | 4.839744045  | 0 | 0 | 0 | st  |
| 642 | 8 | 5 | 2.100000  | 6.947218745  | 6.749404185  | 4.971778212  | 0 | 0 | 0 | st  |
| 643 | 8 | 1 | 1.575000  | 7.727751898  | 9.441957326  | 14.792747493 | 0 | 0 | 0 | ao  |
| 644 | 8 | 1 | 1.575000  | 10.314891886 | 9.431932665  | 10.569647493 | 0 | 0 | 0 | ao  |
| 645 | 8 | 1 | 1.575000  | 5.173275843  | 9.425114554  | 16.141210963 | 0 | 0 | 0 | ao  |
| 646 | 8 | 1 | 1.575000  | 7.760279300  | 9.415126926  | 11.918102305 | 0 | 0 | 0 | ao  |
| 647 | 8 | 2 | 0.425000  | 8.279155855  | 10.809263371 | 9.911451013  | 0 | 0 | 0 | ho  |
| 648 | 8 | 2 | 0.425000  | 5.708722528  | 10.907604153 | 14.180912462 | 0 | 0 | 0 | ho  |
| 649 | 8 | 2 | 0.425000  | 9.780464323  | 7.953309910  | 12.532201022 | 0 | 0 | 0 | ho  |
| 650 | 8 | 6 | 0.425000  | 7.208867415  | 8.047342661  | 16.799025190 | 0 | 0 | 0 | do  |
| 651 | 8 | 3 | -1.050000 | 7.137120767  | 8.366650650  | 13.358380749 | 0 | 0 | 0 | ob  |
| 652 | 8 | 3 | -1.050000 | 6.752083948  | 8.374565989  | 10.673429865 | 0 | 0 | 0 | ob  |
| 653 | 8 | 3 | -1.050000 | 9.325620410  | 8.381864470  | 14.907177115 | 0 | 0 | 0 | ob  |
| 654 | 8 | 3 | -1.050000 | 7.382550450  | 6.129770541  | 11.985412584 | 0 | 0 | 0 | ob  |
| 655 | 8 | 3 | -1.050000 | 5.769405783  | 10.492260884 | 9.130033991  | 0 | 0 | 0 | ob  |
| 656 | 8 | 3 | -1.050000 | 8.350975495  | 10.490415515 | 13.352451743 | 0 | 0 | 0 | ob  |
| 657 | 8 | 3 | -1.050000 | 7.518325134  | 12.724043172 | 12.176747445 | 0 | 0 | 0 | ob  |
| 658 | 8 | 3 | -1.050000 | 10.091742666 | 12.727559909 | 16.405069793 | 0 | 0 | 0 | ob  |
| 659 | 8 | 3 | -1.050000 | 5.521399510  | 12.726845271 | 10.506543562 | 0 | 0 | 0 | ob  |
| 660 | 8 | 3 | -1.050000 | 8.105959518  | 12.727122387 | 14.725300930 | 0 | 0 | 0 | ob  |
| 661 | 8 | 4 | -0.950000 | 6.136617447  | 10.414157382 | 14.905911812 | 0 | 0 | 0 | oh  |
| 662 | 8 | 4 | -0.950000 | 8.721870440  | 10.401464731 | 10.678860000 | 0 | 0 | 0 | oh  |
| 663 | 8 | 3 | -1.050000 | 7.531790946  | 12.450593209 | 8.867196118  | 0 | 0 | 0 | ob  |
| 664 | 8 | 3 | -1.050000 | 10.126075993 | 12.434440270 | 13.098538892 | 0 | 0 | 0 | ob  |
| 665 | 8 | 7 | -0.950000 | 6.766165723  | 8.455610067  | 16.031829270 | 0 | 0 | 0 | oho |
| 666 | 8 | 3 | -1.050000 | 5.362751485  | 6.422246611  | 13.612516698 | 0 | 0 | 0 | ob  |
| 667 | 8 | 4 | -0.950000 | 9.351776468  | 8.443336781  | 11.805359607 | 0 | 0 | 0 | oh  |
| 668 | 8 | 3 | -1.050000 | 7.956469734  | 6.406422954  | 9.393964434  | 0 | 0 | 0 | ob  |
| 669 | 8 | 3 | -1.050000 | 6.162737272  | 10.475258613 | 11.803442278 | 0 | 0 | 0 | ob  |
| 670 | 8 | 3 | -1.050000 | 8.736285134  | 10.482465238 | 16.037475661 | 0 | 0 | 0 | ob  |
| 671 | 8 | 3 | -1.050000 | 9.718637623  | 8.364976708  | 9.131339972  | 0 | 0 | 0 | ob  |
| 672 | 8 | 3 | -1.050000 | 5.396534585  | 6.129733707  | 10.305776368 | 0 | 0 | 0 | ob  |
| 673 | 8 | 3 | -1.050000 | 7.970487271  | 6.133036431  | 14.533957725 | 0 | 0 | 0 | ob  |
| 674 | 8 | 5 | 2.100000  | 6.039803477  | 12.104699038 | 11.902086522 | 0 | 0 | 0 | st  |
| 675 | 8 | 5 | 2.100000  | 8.611829217  | 12.113680341 | 16.129979551 | 0 | 0 | 0 | st  |
| 676 | 8 | 5 | 2.100000  | 9.535176051  | 6.746036608  | 9.193674984  | 0 | 0 | 0 | st  |
| 677 | 8 | 5 | 2.100000  | 6.876533961  | 6.743339967  | 10.580878354 | 0 | 0 | 0 | st  |
| 678 | 8 | 5 | 2.100000  | 9.448950250  | 6.752417420  | 14.808624273 | 0 | 0 | 0 | st  |
| 679 | 8 | 5 | 2.100000  | 5.953078839  | 12.111149911 | 9.067561151  | 0 | 0 | 0 | st  |
| 680 | 8 | 5 | 2.100000  | 8.541472668  | 12.107497425 | 13.289344045 | 0 | 0 | 0 | st  |
| 681 | 8 | 5 | 2.100000  | 6.947218745  | 6.749404185  | 13.421378212 | 0 | 0 | 0 | st  |
| 682 | 8 | 3 | -1.050000 | 5.769405783  | 10.492260884 | 17.579633991 | 0 | 0 | 0 | ob  |
| 683 | 8 | 8 | -0.950000 | 5.521399510  | 12.726845271 | 18.956143562 | 0 | 0 | 0 | oht |
| 684 | 8 | 3 | -1.050000 | 7.531790946  | 12.450593209 | 17.316796118 | 0 | 0 | 0 | ob  |
| 685 | 8 | 5 | 2.100000  | 5.953078839  | 12.111149911 | 17.517161151 | 0 | 0 | 0 | st  |
| 686 | 8 | 8 | -0.950000 | 10.008851183 | 6.750028849  | 16.634714390 | 0 | 0 | 0 | oht |
| 687 | 8 | 6 | 0.425000  | 5.598238959  | 12.634198365 | 20.059598264 | 0 | 0 | 0 | do  |
| 688 | 8 | 6 | 0.425000  | 9.620633436  | 6.850413767  | 17.669755394 | 0 | 0 | 0 | do  |
| 689 | 9 | 1 | 1.575000  | 12.890551898 | 9.441957326  | 6.343147493  | 0 | 0 | 0 | ao  |
| 690 | 9 | 1 | 1.575000  | 15.477691886 | 9.431932665  | 2.120047493  | 0 | 0 | 0 | ao  |
| 691 | 9 | 1 | 1.575000  | 10.336075843 | 9.425114554  | 7.691610963  | 0 | 0 | 0 | ao  |
| 692 | 9 | 1 | 1.575000  | 12.923079300 | 9.415126926  | 3.468502305  | 0 | 0 | 0 | ao  |
| 693 | 9 | 2 | 0.425000  | 13.441955855 | 10.809263371 | 1.461851013  | 0 | 0 | 0 | ho  |
| 694 | 9 | 2 | 0.425000  | 10.871522528 | 10.907604153 | 5.731312462  | 0 | 0 | 0 | ho  |
| 695 | 9 | 2 | 0.425000  | 14.943264323 | 7.953309910  | 4.082601022  | 0 | 0 | 0 | ho  |
| 696 | 9 | 2 | 0.425000  | 12.371667415 | 8.047342661  | 8.349425190  | 0 | 0 | 0 | ho  |
| 697 | 9 | 3 | -1.050000 | 12.299920767 | 8.366650650  | 4.908780749  | 0 | 0 | 0 | ob  |
| 698 | 9 | 3 | -1.050000 | 11.914883948 | 8.374565989  | 2.223829865  | 0 | 0 | 0 | ob  |
| 699 | 9 | 3 | -1.050000 | 14.488420410 | 8.381864470  | 6.457577115  | 0 | 0 | 0 | ob  |
| 700 | 9 | 3 | -1.050000 | 12.545350450 | 6.129770541  | 3.535812584  | 0 | 0 | 0 | ob  |
| 701 | 9 | 3 | -1.050000 | 15.129943942 | 6.130571910  | 7.754751701  | 0 | 0 | 0 | ob  |
| 702 | 9 | 3 | -1.050000 | 10.932205783 | 10.492260884 | 0.680433991  | 0 | 0 | 0 | ob  |
| 703 | 9 | 3 | -1.050000 | 13.513775495 | 10.490415515 | 4.902851743  | 0 | 0 | 0 | ob  |
| 704 | 9 | 3 | -1.050000 | 12.681125134 | 12.724043172 | 3.727147445  | 0 | 0 | 0 | ob  |

|     |    |   |           |               |              |              |   |   |   |     |
|-----|----|---|-----------|---------------|--------------|--------------|---|---|---|-----|
| 705 | 9  | 3 | -1.050000 | 15.254542666  | 12.727559909 | 7.955469793  | 0 | 0 | 0 | ob  |
| 706 | 9  | 3 | -1.050000 | 10.684199510  | 12.726845271 | 2.056943562  | 0 | 0 | 0 | ob  |
| 707 | 9  | 3 | -1.050000 | 13.268759518  | 12.727122387 | 6.275700930  | 0 | 0 | 0 | ob  |
| 708 | 9  | 4 | -0.950000 | 11.299417447  | 10.414157382 | 6.456311812  | 0 | 0 | 0 | oh  |
| 709 | 9  | 4 | -0.950000 | 13.884670440  | 10.401464731 | 2.229260000  | 0 | 0 | 0 | oh  |
| 710 | 9  | 3 | -1.050000 | 12.694590946  | 12.450593209 | 0.417596118  | 0 | 0 | 0 | ob  |
| 711 | 9  | 3 | -1.050000 | 15.288875993  | 12.434440270 | 4.648938892  | 0 | 0 | 0 | ob  |
| 712 | 9  | 4 | -0.950000 | 11.928965723  | 8.455610067  | 7.582229270  | 0 | 0 | 0 | oh  |
| 713 | 9  | 3 | -1.050000 | 10.525551485  | 6.422246611  | 5.162916698  | 0 | 0 | 0 | ob  |
| 714 | 9  | 4 | -0.950000 | 14.514576468  | 8.443336781  | 3.355759607  | 0 | 0 | 0 | oh  |
| 715 | 9  | 3 | -1.050000 | 13.119269734  | 6.406422954  | 0.944364434  | 0 | 0 | 0 | ob  |
| 716 | 9  | 3 | -1.050000 | 11.325537272  | 10.475258613 | 3.353842278  | 0 | 0 | 0 | ob  |
| 717 | 9  | 3 | -1.050000 | 13.899085134  | 10.482465238 | 7.587875661  | 0 | 0 | 0 | ob  |
| 718 | 9  | 3 | -1.050000 | 14.881437623  | 8.364976708  | 0.681739972  | 0 | 0 | 0 | ob  |
| 719 | 9  | 3 | -1.050000 | 10.559334585  | 6.129733707  | 1.856176368  | 0 | 0 | 0 | ob  |
| 720 | 9  | 3 | -1.050000 | 13.133287271  | 6.133036431  | 6.084357725  | 0 | 0 | 0 | ob  |
| 721 | 9  | 5 | 2.100000  | 11.202603477  | 12.104699038 | 3.452486522  | 0 | 0 | 0 | st  |
| 722 | 9  | 5 | 2.100000  | 13.774629217  | 12.113680341 | 7.680379551  | 0 | 0 | 0 | st  |
| 723 | 9  | 5 | 2.100000  | 14.697976051  | 6.746036608  | 0.744074984  | 0 | 0 | 0 | st  |
| 724 | 9  | 5 | 2.100000  | 12.039333961  | 6.743339967  | 2.131278354  | 0 | 0 | 0 | st  |
| 725 | 9  | 5 | 2.100000  | 14.611750250  | 6.752417420  | 6.359024273  | 0 | 0 | 0 | st  |
| 726 | 9  | 5 | 2.100000  | 11.115878839  | 12.111149911 | 0.617961151  | 0 | 0 | 0 | st  |
| 727 | 9  | 5 | 2.100000  | 13.704272668  | 12.107497425 | 4.839744045  | 0 | 0 | 0 | st  |
| 728 | 9  | 5 | 2.100000  | 12.110018745  | 6.749404185  | 4.971778212  | 0 | 0 | 0 | st  |
| 729 | 9  | 1 | 1.575000  | 12.890551898  | 9.441957326  | 14.792747493 | 0 | 0 | 0 | ao  |
| 730 | 9  | 1 | 1.575000  | 15.477691886  | 9.431932665  | 10.569647493 | 0 | 0 | 0 | ao  |
| 731 | 9  | 1 | 1.575000  | 10.336075843  | 9.425114554  | 16.141210963 | 0 | 0 | 0 | ao  |
| 732 | 9  | 1 | 1.575000  | 12.923079300  | 9.415126926  | 11.918102305 | 0 | 0 | 0 | ao  |
| 733 | 9  | 2 | 0.425000  | 13.441955855  | 10.809263371 | 9.911451013  | 0 | 0 | 0 | ho  |
| 734 | 9  | 2 | 0.425000  | 10.871522528  | 10.907604153 | 14.180912462 | 0 | 0 | 0 | ho  |
| 735 | 9  | 2 | 0.425000  | 14.943264323  | 7.953309910  | 12.532201022 | 0 | 0 | 0 | ho  |
| 736 | 9  | 6 | 0.425000  | 12.371667415  | 8.047342661  | 16.799025190 | 0 | 0 | 0 | do  |
| 737 | 9  | 3 | -1.050000 | 12.299920767  | 8.366650650  | 13.358380749 | 0 | 0 | 0 | ob  |
| 738 | 9  | 3 | -1.050000 | 11.914883948  | 8.374565989  | 10.673429865 | 0 | 0 | 0 | ob  |
| 739 | 9  | 3 | -1.050000 | 14.488420410  | 8.381864470  | 14.907177115 | 0 | 0 | 0 | ob  |
| 740 | 9  | 3 | -1.050000 | 12.545350450  | 6.129770541  | 11.985412584 | 0 | 0 | 0 | ob  |
| 741 | 9  | 3 | -1.050000 | 10.932205783  | 10.492260884 | 9.130033991  | 0 | 0 | 0 | ob  |
| 742 | 9  | 3 | -1.050000 | 13.513775495  | 10.490415515 | 13.352451743 | 0 | 0 | 0 | ob  |
| 743 | 9  | 3 | -1.050000 | 12.681125134  | 12.724043172 | 12.176747445 | 0 | 0 | 0 | ob  |
| 744 | 9  | 3 | -1.050000 | 15.254542666  | 12.727559909 | 16.405069793 | 0 | 0 | 0 | ob  |
| 745 | 9  | 3 | -1.050000 | 10.684199510  | 12.726845271 | 10.506543562 | 0 | 0 | 0 | ob  |
| 746 | 9  | 3 | -1.050000 | 13.268759518  | 12.727122387 | 14.725300930 | 0 | 0 | 0 | ob  |
| 747 | 9  | 4 | -0.950000 | 11.299417447  | 10.414157382 | 14.905911812 | 0 | 0 | 0 | oh  |
| 748 | 9  | 4 | -0.950000 | 13.884670440  | 10.401464731 | 10.678860000 | 0 | 0 | 0 | oh  |
| 749 | 9  | 3 | -1.050000 | 12.694590946  | 12.450593209 | 8.867196118  | 0 | 0 | 0 | ob  |
| 750 | 9  | 3 | -1.050000 | 15.288875993  | 12.434440270 | 13.098538892 | 0 | 0 | 0 | ob  |
| 751 | 9  | 7 | -0.950000 | 11.928965723  | 8.455610067  | 16.031829270 | 0 | 0 | 0 | oho |
| 752 | 9  | 3 | -1.050000 | 10.525551485  | 6.422246611  | 13.612516698 | 0 | 0 | 0 | ob  |
| 753 | 9  | 4 | -0.950000 | 14.514576468  | 8.443336781  | 11.805359607 | 0 | 0 | 0 | oh  |
| 754 | 9  | 3 | -1.050000 | 13.119269734  | 6.406422954  | 9.393964434  | 0 | 0 | 0 | ob  |
| 755 | 9  | 3 | -1.050000 | 11.325537272  | 10.475258613 | 11.803442278 | 0 | 0 | 0 | ob  |
| 756 | 9  | 3 | -1.050000 | 13.899085134  | 10.482465238 | 16.037475661 | 0 | 0 | 0 | ob  |
| 757 | 9  | 3 | -1.050000 | 14.881437623  | 8.364976708  | 9.131339972  | 0 | 0 | 0 | ob  |
| 758 | 9  | 3 | -1.050000 | 10.559334585  | 6.129733707  | 10.305776368 | 0 | 0 | 0 | ob  |
| 759 | 9  | 3 | -1.050000 | 13.133287271  | 6.133036431  | 14.533957725 | 0 | 0 | 0 | ob  |
| 760 | 9  | 5 | 2.100000  | 11.202603477  | 12.104699038 | 11.902086522 | 0 | 0 | 0 | st  |
| 761 | 9  | 5 | 2.100000  | 13.774629217  | 12.113680341 | 16.129979551 | 0 | 0 | 0 | st  |
| 762 | 9  | 5 | 2.100000  | 14.697976051  | 6.746036608  | 9.193674984  | 0 | 0 | 0 | st  |
| 763 | 9  | 5 | 2.100000  | 12.039333961  | 6.743339967  | 10.580878354 | 0 | 0 | 0 | st  |
| 764 | 9  | 5 | 2.100000  | 14.611750250  | 6.752417420  | 14.808624273 | 0 | 0 | 0 | st  |
| 765 | 9  | 5 | 2.100000  | 11.115878839  | 12.111149911 | 9.067561151  | 0 | 0 | 0 | st  |
| 766 | 9  | 5 | 2.100000  | 13.704272668  | 12.107497425 | 13.289344045 | 0 | 0 | 0 | st  |
| 767 | 9  | 5 | 2.100000  | 12.110018745  | 6.749404185  | 13.421378212 | 0 | 0 | 0 | st  |
| 768 | 9  | 3 | -1.050000 | 10.932205783  | 10.492260884 | 17.579633991 | 0 | 0 | 0 | ob  |
| 769 | 9  | 8 | -0.950000 | 10.684199510  | 12.726845271 | 18.956143562 | 0 | 0 | 0 | oht |
| 770 | 9  | 3 | -1.050000 | 12.694590946  | 12.450593209 | 17.316796118 | 0 | 0 | 0 | ob  |
| 771 | 9  | 5 | 2.100000  | 11.115878839  | 12.111149911 | 17.517161151 | 0 | 0 | 0 | st  |
| 772 | 9  | 8 | -0.950000 | 15.171651183  | 6.750028849  | 16.634714390 | 0 | 0 | 0 | oht |
| 773 | 9  | 6 | 0.425000  | 10.761038959  | 12.634198365 | 20.059598264 | 0 | 0 | 0 | do  |
| 774 | 9  | 6 | 0.425000  | 14.783433436  | 6.850413767  | 17.669755394 | 0 | 0 | 0 | do  |
| 775 | 10 | 1 | 1.575000  | -12.923448102 | 9.441957326  | 6.343147493  | 1 | 0 | 0 | ao  |
| 776 | 10 | 1 | 1.575000  | -10.336308114 | 9.431932665  | 2.120047493  | 1 | 0 | 0 | ao  |
| 777 | 10 | 1 | 1.575000  | -15.477924157 | 9.425114554  | 7.691610963  | 1 | 0 | 0 | ao  |
| 778 | 10 | 1 | 1.575000  | -12.890920700 | 9.415126926  | 3.468502305  | 1 | 0 | 0 | ao  |
| 779 | 10 | 2 | 0.425000  | -12.372044145 | 10.809263371 | 1.461851013  | 1 | 0 | 0 | ho  |
| 780 | 10 | 2 | 0.425000  | -14.942477472 | 10.907604153 | 5.731312462  | 1 | 0 | 0 | ho  |
| 781 | 10 | 2 | 0.425000  | -10.870735677 | 7.953309910  | 4.082601022  | 1 | 0 | 0 | ho  |
| 782 | 10 | 2 | 0.425000  | -13.442332585 | 8.047342661  | 8.349425190  | 1 | 0 | 0 | ho  |
| 783 | 10 | 3 | -1.050000 | -13.514079233 | 8.366650650  | 4.908780749  | 1 | 0 | 0 | ob  |
| 784 | 10 | 3 | -1.050000 | -13.899116052 | 8.374565989  | 2.223829865  | 1 | 0 | 0 | ob  |
| 785 | 10 | 3 | -1.050000 | -11.325579590 | 8.381864470  | 6.457577115  | 1 | 0 | 0 | ob  |
| 786 | 10 | 3 | -1.050000 | -13.268649550 | 6.129770541  | 3.535812584  | 1 | 0 | 0 | ob  |
| 787 | 10 | 3 | -1.050000 | -10.684056058 | 6.130571910  | 7.754751701  | 1 | 0 | 0 | ob  |
| 788 | 10 | 3 | -1.050000 | -14.881794217 | 10.492260884 | 0.680433991  | 1 | 0 | 0 | ob  |
| 789 | 10 | 3 | -1.050000 | -12.300224505 | 10.490415515 | 4.902851743  | 1 | 0 | 0 | ob  |
| 790 | 10 | 3 | -1.050000 | -13.132874866 | 12.724043172 | 3.727147445  | 1 | 0 | 0 | ob  |
| 791 | 10 | 3 | -1.050000 | -10.559457334 | 12.727559909 | 7.955469793  | 1 | 0 | 0 | ob  |
| 792 | 10 | 3 | -1.050000 | -15.129800490 | 12.726845271 | 2.056943562  | 1 | 0 | 0 | ob  |
| 793 | 10 | 3 | -1.050000 | -12.545240482 | 12.727122387 | 6.275700930  | 1 | 0 | 0 | ob  |
| 794 | 10 | 4 | -0.950000 | -14.514582553 | 10.414157382 | 6.456311812  | 1 | 0 | 0 | oh  |
| 795 | 10 | 4 | -0.950000 | -11.929329560 | 10.401464731 | 2.229260000  | 1 | 0 | 0 | oh  |
| 796 | 10 | 3 | -1.050000 | -13.119409054 | 12.450593209 | 0.417596118  | 1 | 0 | 0 | ob  |
| 797 | 10 | 3 | -1.050000 | -10.525124007 | 12.434440270 | 4.648938892  | 1 | 0 | 0 | ob  |

798 10 4 -0.950000 -13.885034277 8.455610067 7.582229270 1 0 0 # oh  
799 10 3 -1.050000 -15.288448515 6.422246611 5.162916698 1 0 0 # ob  
800 10 4 -0.950000 -11.299423532 8.443336781 3.355759607 1 0 0 # oh  
801 10 3 -1.050000 -12.694730266 6.406422954 0.944364434 1 0 0 # ob  
802 10 3 -1.050000 -14.488462728 10.475258613 3.353842278 1 0 0 # ob  
803 10 3 -1.050000 -11.914914866 10.482465238 7.587875661 1 0 0 # ob  
804 10 3 -1.050000 -10.932562377 8.364976708 0.681739972 1 0 0 # ob  
805 10 3 -1.050000 -15.254665415 6.129733707 1.856176368 1 0 0 # ob  
806 10 3 -1.050000 -12.680712729 6.133036431 6.084357725 1 0 0 # ob  
807 10 5 2.100000 -14.611396523 12.104699038 3.452486522 1 0 0 # st  
808 10 5 2.100000 -12.039370783 12.113680341 7.680379551 1 0 0 # st  
809 10 5 2.100000 -11.116023949 6.746036608 0.744074984 1 0 0 # st  
810 10 5 2.100000 -13.774666039 6.743339967 2.131278354 1 0 0 # st  
811 10 5 2.100000 -11.202249750 6.752417420 6.359024273 1 0 0 # st  
812 10 5 2.100000 -14.698121161 12.111149911 0.617961151 1 0 0 # st  
813 10 5 2.100000 -12.109727332 12.107497425 4.839744045 1 0 0 # st  
814 10 5 2.100000 -13.703981255 6.749404185 4.971778212 1 0 0 # st  
815 10 1 1.575000 -12.923448102 9.441957326 14.792747493 1 0 0 # ao  
816 10 1 1.575000 -10.336308114 9.431932665 10.569647493 1 0 0 # ao  
817 10 1 1.575000 -15.477924157 9.425114554 16.141210963 1 0 0 # ao  
818 10 1 1.575000 -12.890920700 9.415126926 11.918102305 1 0 0 # ao  
819 10 2 0.425000 -12.372044145 10.809263371 9.911451013 1 0 0 # ho  
820 10 2 0.425000 -14.942477472 10.907604153 14.180912462 1 0 0 # ho  
821 10 2 0.425000 -10.870735677 7.953309910 12.532201022 1 0 0 # ho  
822 10 6 0.425000 -13.442332585 8.047342661 16.799025190 1 0 0 # do  
823 10 3 -1.050000 -13.514079233 8.366650650 13.358380749 1 0 0 # ob  
824 10 3 -1.050000 -13.899116052 8.374565989 10.673429865 1 0 0 # ob  
825 10 3 -1.050000 -11.325579590 8.381864470 14.907177115 1 0 0 # ob  
826 10 3 -1.050000 -13.268649550 6.129770541 11.985412584 1 0 0 # ob  
827 10 3 -1.050000 -14.881794217 10.492260884 9.130033991 1 0 0 # ob  
828 10 3 -1.050000 -12.300224505 10.490415515 13.352451743 1 0 0 # ob  
829 10 3 -1.050000 -13.132874866 12.724043172 12.176747445 1 0 0 # ob  
830 10 3 -1.050000 -10.559457334 12.727559909 16.405069793 1 0 0 # ob  
831 10 3 -1.050000 -15.129800490 12.726845271 10.506543562 1 0 0 # ob  
832 10 3 -1.050000 -12.545240482 12.727122387 14.725300930 1 0 0 # ob  
833 10 4 -0.950000 -14.514582553 10.414157382 14.905911812 1 0 0 # oh  
834 10 4 -0.950000 -11.929329560 10.401464731 10.678860000 1 0 0 # oh  
835 10 3 -1.050000 -13.119409054 12.450593209 8.867196118 1 0 0 # ob  
836 10 3 -1.050000 -10.525124007 12.434440270 13.098538892 1 0 0 # ob  
837 10 7 -0.950000 -13.885034277 8.455610067 16.031829270 1 0 0 # oho  
838 10 3 -1.050000 -15.288448515 6.422246611 13.612516698 1 0 0 # ob  
839 10 4 -0.950000 -11.299423532 8.443336781 11.805359607 1 0 0 # oh  
840 10 3 -1.050000 -12.694730266 6.406422954 9.393964434 1 0 0 # ob  
841 10 3 -1.050000 -14.488462728 10.475258613 11.803442278 1 0 0 # ob  
842 10 3 -1.050000 -11.914914866 10.482465238 16.037475661 1 0 0 # ob  
843 10 3 -1.050000 -10.932562377 8.364976708 9.131339972 1 0 0 # ob  
844 10 3 -1.050000 -15.254665415 6.129733707 10.305776368 1 0 0 # ob  
845 10 3 -1.050000 -12.680712729 6.133036431 14.533957725 1 0 0 # ob  
846 10 5 2.100000 -14.611396523 12.104699038 11.902086522 1 0 0 # st  
847 10 5 2.100000 -12.039370783 12.113680341 16.129979551 1 0 0 # st  
848 10 5 2.100000 -11.116023949 6.746036608 9.193674984 1 0 0 # st  
849 10 5 2.100000 -13.774666039 6.743339967 5.80878354 1 0 0 # st  
850 10 5 2.100000 -11.202249750 6.752417420 14.808624273 1 0 0 # st  
851 10 5 2.100000 -14.698121161 12.111149911 9.067561151 1 0 0 # st  
852 10 5 2.100000 -12.109727332 12.107497425 13.289344045 1 0 0 # st  
853 10 5 2.100000 -13.703981255 6.749404185 13.421378212 1 0 0 # st  
854 10 3 -1.050000 -14.881794217 10.492260884 17.579633991 1 0 0 # ob  
855 10 8 -0.950000 -15.129800490 12.726845271 18.956143562 1 0 0 # oht  
856 10 3 -1.050000 -13.119409054 12.450593209 17.316796118 1 0 0 # ob  
857 10 5 2.100000 -14.698121161 12.111149911 17.517161151 1 0 0 # st  
858 10 8 -0.950000 -10.642348817 6.750028849 16.634714390 1 0 0 # oht  
859 10 6 0.425000 -15.052961041 12.634198365 20.059598264 1 0 0 # do  
860 10 6 0.425000 -11.030566564 6.850413767 17.669755394 1 0 0 # do  
861 11 1 1.575000 -7.760648102 9.441957326 6.343147493 1 0 0 # ao  
862 11 1 1.575000 -5.173508114 9.431932665 2.120047493 1 0 0 # ao  
863 11 1 1.575000 -10.315124157 9.425114554 7.691610963 1 0 0 # ao  
864 11 1 1.575000 -7.728120700 9.415126926 3.468502305 1 0 0 # ao  
865 11 2 0.425000 -7.209244145 10.809263371 1.461851013 1 0 0 # ho  
866 11 2 0.425000 -9.779677472 10.907604153 5.731312462 1 0 0 # ho  
867 11 2 0.425000 -5.707935677 7.953309910 4.082601022 1 0 0 # ho  
868 11 2 0.425000 -8.279532585 8.047342661 8.349425190 1 0 0 # ho  
869 11 3 -1.050000 -8.351279233 8.366650650 4.908780749 1 0 0 # ob  
870 11 3 -1.050000 -8.736316052 8.374565989 2.223829865 1 0 0 # ob  
871 11 3 -1.050000 -6.162779590 8.381864470 6.457577115 1 0 0 # ob  
872 11 3 -1.050000 -8.105849550 6.129770541 3.535812584 1 0 0 # ob  
873 11 3 -1.050000 -5.521256058 6.130571910 7.754751701 1 0 0 # ob  
874 11 3 -1.050000 -9.718994217 10.492260884 0.680433991 1 0 0 # ob  
875 11 3 -1.050000 -7.137424505 10.490415515 4.902851743 1 0 0 # ob  
876 11 3 -1.050000 -7.970074866 12.724043172 3.727147445 1 0 0 # ob  
877 11 3 -1.050000 -5.396657334 12.727559909 7.955469793 1 0 0 # ob  
878 11 3 -1.050000 -9.967000490 12.726845271 2.056943562 1 0 0 # ob  
879 11 3 -1.050000 -7.382440482 12.727122387 6.275700930 1 0 0 # ob  
880 11 4 -0.950000 -9.351782553 10.414157382 6.456311812 1 0 0 # oh  
881 11 4 -0.950000 -6.766529560 10.401464731 2.229260000 1 0 0 # oh  
882 11 3 -1.050000 -7.956609054 12.450593209 0.417596118 1 0 0 # ob  
883 11 3 -1.050000 -5.362324007 12.434440270 4.648938892 1 0 0 # ob  
884 11 4 -0.950000 -8.722234277 8.455610067 7.582229270 1 0 0 # oh  
885 11 3 -1.050000 -10.125648515 6.422246611 5.162916698 1 0 0 # ob  
886 11 4 -0.950000 -6.136623532 8.443336781 3.355759607 1 0 0 # oh  
887 11 3 -1.050000 -7.531930266 6.406422954 0.944364434 1 0 0 # ob  
888 11 3 -1.050000 -9.325662728 10.475258613 3.353842278 1 0 0 # ob  
889 11 3 -1.050000 -6.752114866 10.482465238 7.587875661 1 0 0 # ob  
890 11 3 -1.050000 -5.769762377 8.364976708 0.681739972 1 0 0 # ob



|     |    |   |           |               |              |              |   |   |   |     |
|-----|----|---|-----------|---------------|--------------|--------------|---|---|---|-----|
| 891 | 11 | 3 | -1.050000 | -10.091865415 | 6.129733707  | 1.856176368  | 1 | 0 | 0 | ob  |
| 892 | 11 | 3 | -1.050000 | -7.517912729  | 6.133036431  | 6.084357725  | 1 | 0 | 0 | ob  |
| 893 | 11 | 5 | 2.100000  | -9.448596523  | 12.104699038 | 3.452486522  | 1 | 0 | 0 | st  |
| 894 | 11 | 5 | 2.100000  | -6.876570783  | 12.113680341 | 7.680379551  | 1 | 0 | 0 | st  |
| 895 | 11 | 5 | 2.100000  | -5.953223949  | 6.746036608  | 0.744074984  | 1 | 0 | 0 | st  |
| 896 | 11 | 5 | 2.100000  | -8.611866039  | 6.743339967  | 2.131278354  | 1 | 0 | 0 | st  |
| 897 | 11 | 5 | 2.100000  | -6.039449750  | 6.752417420  | 6.359024273  | 1 | 0 | 0 | st  |
| 898 | 11 | 5 | 2.100000  | -9.535321161  | 12.111149911 | 0.617961151  | 1 | 0 | 0 | st  |
| 899 | 11 | 5 | 2.100000  | -6.946927332  | 12.107497425 | 4.839744045  | 1 | 0 | 0 | st  |
| 900 | 11 | 5 | 2.100000  | -8.541181255  | 6.749404185  | 4.971778212  | 1 | 0 | 0 | st  |
| 901 | 11 | 1 | 1.575000  | -7.760648102  | 9.441957326  | 14.792747493 | 1 | 0 | 0 | ao  |
| 902 | 11 | 1 | 1.575000  | -5.173508114  | 9.431932665  | 10.569647493 | 1 | 0 | 0 | ao  |
| 903 | 11 | 1 | 1.575000  | -10.315124157 | 9.425114554  | 16.141210963 | 1 | 0 | 0 | ao  |
| 904 | 11 | 1 | 1.575000  | -7.728120700  | 9.415126926  | 11.918102305 | 1 | 0 | 0 | ao  |
| 905 | 11 | 2 | 0.425000  | -7.209244145  | 10.809263371 | 9.911451013  | 1 | 0 | 0 | ho  |
| 906 | 11 | 2 | 0.425000  | -9.779677472  | 10.907604153 | 14.180912462 | 1 | 0 | 0 | ho  |
| 907 | 11 | 2 | 0.425000  | -5.707935677  | 7.953309910  | 12.532201022 | 1 | 0 | 0 | ho  |
| 908 | 11 | 6 | 0.425000  | -8.279532585  | 8.047342661  | 16.799025190 | 1 | 0 | 0 | do  |
| 909 | 11 | 3 | -1.050000 | -8.351279233  | 8.366650650  | 13.358380749 | 1 | 0 | 0 | ob  |
| 910 | 11 | 3 | -1.050000 | -8.736316052  | 8.374565989  | 10.673429865 | 1 | 0 | 0 | ob  |
| 911 | 11 | 3 | -1.050000 | -6.162779590  | 8.381864470  | 14.907177115 | 1 | 0 | 0 | ob  |
| 912 | 11 | 3 | -1.050000 | -8.105849550  | 6.129770541  | 11.985412584 | 1 | 0 | 0 | ob  |
| 913 | 11 | 3 | -1.050000 | -9.718994217  | 10.492260884 | 9.130033991  | 1 | 0 | 0 | ob  |
| 914 | 11 | 3 | -1.050000 | -7.137424505  | 10.490415515 | 13.352451743 | 1 | 0 | 0 | ob  |
| 915 | 11 | 3 | -1.050000 | -7.970074866  | 12.724043172 | 12.176747445 | 1 | 0 | 0 | ob  |
| 916 | 11 | 3 | -1.050000 | -5.396657334  | 12.727559909 | 16.405069793 | 1 | 0 | 0 | ob  |
| 917 | 11 | 3 | -1.050000 | -9.967000490  | 12.726845271 | 10.506543562 | 1 | 0 | 0 | ob  |
| 918 | 11 | 3 | -1.050000 | -7.382440482  | 12.727122387 | 14.725300930 | 1 | 0 | 0 | ob  |
| 919 | 11 | 4 | -0.950000 | -9.351782553  | 10.414157382 | 14.905911812 | 1 | 0 | 0 | oh  |
| 920 | 11 | 4 | -0.950000 | -6.766529560  | 10.401464731 | 10.678860000 | 1 | 0 | 0 | oh  |
| 921 | 11 | 3 | -1.050000 | -7.956609054  | 12.450593209 | 8.867196118  | 1 | 0 | 0 | ob  |
| 922 | 11 | 3 | -1.050000 | -5.362324007  | 12.434440270 | 13.098538892 | 1 | 0 | 0 | ob  |
| 923 | 11 | 7 | -0.950000 | -8.722234277  | 8.455610067  | 16.031829270 | 1 | 0 | 0 | oho |
| 924 | 11 | 3 | -1.050000 | -10.125648515 | 6.422246611  | 13.612516698 | 1 | 0 | 0 | ob  |
| 925 | 11 | 4 | -0.950000 | -6.136623532  | 8.443336781  | 11.805359607 | 1 | 0 | 0 | oh  |
| 926 | 11 | 3 | -1.050000 | -7.531930266  | 6.406422954  | 9.393964434  | 1 | 0 | 0 | ob  |
| 927 | 11 | 3 | -1.050000 | -9.325662728  | 10.475258613 | 11.803442278 | 1 | 0 | 0 | ob  |
| 928 | 11 | 3 | -1.050000 | -6.752114866  | 10.482465238 | 16.037475661 | 1 | 0 | 0 | ob  |
| 929 | 11 | 3 | -1.050000 | -5.769762377  | 8.364976708  | 9.131339972  | 1 | 0 | 0 | ob  |
| 930 | 11 | 3 | -1.050000 | -10.091865415 | 6.129733707  | 10.305776368 | 1 | 0 | 0 | ob  |
| 931 | 11 | 3 | -1.050000 | -7.517912729  | 6.133036431  | 14.533957725 | 1 | 0 | 0 | ob  |
| 932 | 11 | 5 | 2.100000  | -9.448596523  | 12.104699038 | 11.902086522 | 1 | 0 | 0 | st  |
| 933 | 11 | 5 | 2.100000  | -6.876570783  | 12.113680341 | 16.129979551 | 1 | 0 | 0 | st  |
| 934 | 11 | 5 | 2.100000  | -5.953223949  | 6.746036608  | 9.193674984  | 1 | 0 | 0 | st  |
| 935 | 11 | 5 | 2.100000  | -8.611866039  | 6.743339967  | 10.580878354 | 1 | 0 | 0 | st  |
| 936 | 11 | 5 | 2.100000  | -6.039449750  | 6.752417420  | 14.808624273 | 1 | 0 | 0 | st  |
| 937 | 11 | 5 | 2.100000  | -9.535321161  | 12.111149911 | 9.067561151  | 1 | 0 | 0 | st  |
| 938 | 11 | 5 | 2.100000  | -6.946927332  | 12.107497425 | 13.289344045 | 1 | 0 | 0 | st  |
| 939 | 11 | 5 | 2.100000  | -8.541181255  | 6.749404185  | 13.421378212 | 1 | 0 | 0 | st  |
| 940 | 11 | 3 | -1.050000 | -9.718994217  | 10.492260884 | 17.579633991 | 1 | 0 | 0 | ob  |
| 941 | 11 | 8 | -0.950000 | -9.967000490  | 12.726845271 | 18.956143562 | 1 | 0 | 0 | oht |
| 942 | 11 | 3 | -1.050000 | -7.956609054  | 12.450593209 | 17.316796118 | 1 | 0 | 0 | ob  |
| 943 | 11 | 5 | 2.100000  | -9.535321161  | 12.111149911 | 17.517161151 | 1 | 0 | 0 | st  |
| 944 | 11 | 8 | -0.950000 | -5.479548817  | 6.750028849  | 16.634714390 | 1 | 0 | 0 | oht |
| 945 | 11 | 6 | 0.425000  | -9.890161041  | 12.634198365 | 20.059598264 | 1 | 0 | 0 | do  |
| 946 | 11 | 6 | 0.425000  | -5.867766564  | 6.850413767  | 17.669755394 | 1 | 0 | 0 | do  |
| 947 | 12 | 1 | 1.575000  | -2.597848102  | 9.441957326  | 6.343147493  | 1 | 0 | 0 | ao  |
| 948 | 12 | 1 | 1.575000  | -0.010708114  | 9.431932665  | 2.120047493  | 1 | 0 | 0 | ao  |
| 949 | 12 | 1 | 1.575000  | -5.15224157   | 9.425114554  | 7.691610963  | 1 | 0 | 0 | ao  |
| 950 | 12 | 1 | 1.575000  | -2.565320700  | 9.415126926  | 3.468502305  | 1 | 0 | 0 | ao  |
| 951 | 12 | 2 | 0.425000  | -2.046444145  | 10.809263371 | 1.461851013  | 1 | 0 | 0 | ho  |
| 952 | 12 | 2 | 0.425000  | -4.616877472  | 10.907604153 | 5.731312462  | 1 | 0 | 0 | ho  |
| 953 | 12 | 2 | 0.425000  | -0.545135677  | 7.953309910  | 4.082601022  | 1 | 0 | 0 | ho  |
| 954 | 12 | 2 | 0.425000  | -3.116732585  | 8.047342661  | 8.349425190  | 1 | 0 | 0 | ho  |
| 955 | 12 | 3 | -1.050000 | -3.188479233  | 8.366650650  | 4.908780749  | 1 | 0 | 0 | ob  |
| 956 | 12 | 3 | -1.050000 | -3.573516052  | 8.374565989  | 2.223829865  | 1 | 0 | 0 | ob  |
| 957 | 12 | 3 | -1.050000 | -0.999979590  | 8.381864470  | 6.457577115  | 1 | 0 | 0 | ob  |
| 958 | 12 | 3 | -1.050000 | -2.943049550  | 6.129770541  | 3.535812584  | 1 | 0 | 0 | ob  |
| 959 | 12 | 3 | -1.050000 | -0.358456058  | 6.130571910  | 7.754751701  | 1 | 0 | 0 | ob  |
| 960 | 12 | 3 | -1.050000 | -4.556194217  | 10.492260884 | 0.680433991  | 1 | 0 | 0 | ob  |
| 961 | 12 | 3 | -1.050000 | -1.974624505  | 10.490415515 | 4.902851743  | 1 | 0 | 0 | ob  |
| 962 | 12 | 3 | -1.050000 | -2.807274866  | 12.724043172 | 3.727147445  | 1 | 0 | 0 | ob  |
| 963 | 12 | 3 | -1.050000 | -0.233857334  | 12.727559909 | 7.955469793  | 1 | 0 | 0 | ob  |
| 964 | 12 | 3 | -1.050000 | -4.804200490  | 12.726845271 | 2.056943562  | 1 | 0 | 0 | ob  |
| 965 | 12 | 3 | -1.050000 | -2.219640482  | 12.727122387 | 6.275700930  | 1 | 0 | 0 | ob  |
| 966 | 12 | 4 | -0.950000 | -4.188982553  | 10.414157382 | 6.456311812  | 1 | 0 | 0 | oh  |
| 967 | 12 | 4 | -0.950000 | -1.603729560  | 10.401464731 | 2.229260000  | 1 | 0 | 0 | oh  |
| 968 | 12 | 3 | -1.050000 | -2.793809054  | 12.450593209 | 0.417596118  | 1 | 0 | 0 | ob  |
| 969 | 12 | 3 | -1.050000 | -0.199524007  | 12.434440270 | 4.648938892  | 1 | 0 | 0 | ob  |
| 970 | 12 | 4 | -0.950000 | -3.559434277  | 8.455610067  | 7.582229270  | 1 | 0 | 0 | oh  |
| 971 | 12 | 3 | -1.050000 | -4.962848515  | 6.422246611  | 5.162916698  | 1 | 0 | 0 | ob  |
| 972 | 12 | 4 | -0.950000 | -0.973823532  | 8.443336781  | 3.355759607  | 1 | 0 | 0 | oh  |
| 973 | 12 | 3 | -1.050000 | -2.369130266  | 6.406422954  | 0.944364434  | 1 | 0 | 0 | ob  |
| 974 | 12 | 3 | -1.050000 | -4.162862728  | 10.475258613 | 3.353842278  | 1 | 0 | 0 | ob  |
| 975 | 12 | 3 | -1.050000 | -1.589314866  | 10.482465238 | 7.587875661  | 1 | 0 | 0 | ob  |
| 976 | 12 | 3 | -1.050000 | -0.606962377  | 8.364976708  | 0.681739972  | 1 | 0 | 0 | ob  |
| 977 | 12 | 3 | -1.050000 | -4.929065415  | 6.129733707  | 1.856176368  | 1 | 0 | 0 | ob  |
| 978 | 12 | 3 | -1.050000 | -2.355112729  | 6.133036431  | 6.084357725  | 1 | 0 | 0 | ob  |
| 979 | 12 | 5 | 2.100000  | -4.285796523  | 12.104699038 | 3.452486522  | 1 | 0 | 0 | st  |
| 980 | 12 | 5 | 2.100000  | -1.713770783  | 12.113680341 | 7.680379551  | 1 | 0 | 0 | st  |
| 981 | 12 | 5 | 2.100000  | -0.790423949  | 6.746036608  | 0.744074984  | 1 | 0 | 0 | st  |
| 982 | 12 | 5 | 2.100000  | -3.449066039  | 6.743339967  | 2.131278354  | 1 | 0 | 0 | st  |
| 983 | 12 | 5 | 2.100000  | -0.876649750  | 6.752417420  | 6.359024273  | 1 | 0 | 0 | st  |

|      |    |   |           |              |               |              |   |   |   |   |     |
|------|----|---|-----------|--------------|---------------|--------------|---|---|---|---|-----|
| 984  | 12 | 5 | 2.100000  | -4.372521161 | 12.111149911  | 0.617961151  | 1 | 0 | 0 | # | st  |
| 985  | 12 | 5 | 2.100000  | -1.784127332 | 12.107497425  | 4.839744045  | 1 | 0 | 0 | # | st  |
| 986  | 12 | 5 | 2.100000  | -3.378381255 | 6.749404185   | 4.971778212  | 1 | 0 | 0 | # | st  |
| 987  | 12 | 1 | 1.575000  | -2.597848102 | 9.441957326   | 14.792747493 | 1 | 0 | 0 | # | ao  |
| 988  | 12 | 1 | 1.575000  | -0.010708114 | 9.431932665   | 10.569647493 | 1 | 0 | 0 | # | ao  |
| 989  | 12 | 1 | 1.575000  | -5.152324157 | 9.425114554   | 16.141210963 | 1 | 0 | 0 | # | ao  |
| 990  | 12 | 1 | 1.575000  | -2.565320700 | 9.415126926   | 11.918102305 | 1 | 0 | 0 | # | ao  |
| 991  | 12 | 2 | 0.425000  | -2.046444145 | 10.809263371  | 9.911451013  | 1 | 0 | 0 | # | ho  |
| 992  | 12 | 2 | 0.425000  | -4.616877472 | 10.907604153  | 14.180912462 | 1 | 0 | 0 | # | ho  |
| 993  | 12 | 2 | 0.425000  | -0.545135677 | 7.953309910   | 12.532201022 | 1 | 0 | 0 | # | ho  |
| 994  | 12 | 6 | 0.425000  | -3.116732585 | 8.047342661   | 16.799025190 | 1 | 0 | 0 | # | do  |
| 995  | 12 | 3 | -1.050000 | -3.188479233 | 8.366650650   | 13.358380749 | 1 | 0 | 0 | # | ob  |
| 996  | 12 | 3 | -1.050000 | -3.573516052 | 8.374565989   | 10.673429865 | 1 | 0 | 0 | # | ob  |
| 997  | 12 | 3 | -1.050000 | -0.999979590 | 8.381864470   | 14.907177115 | 1 | 0 | 0 | # | ob  |
| 998  | 12 | 3 | -1.050000 | -2.943049550 | 6.129770541   | 11.985412584 | 1 | 0 | 0 | # | ob  |
| 999  | 12 | 3 | -1.050000 | -4.556194217 | 10.492260884  | 9.130033991  | 1 | 0 | 0 | # | ob  |
| 1000 | 12 | 3 | -1.050000 | -1.974624505 | 10.490415515  | 13.352451743 | 1 | 0 | 0 | # | ob  |
| 1001 | 12 | 3 | -1.050000 | -2.807274866 | 12.724043172  | 12.176747445 | 1 | 0 | 0 | # | ob  |
| 1002 | 12 | 3 | -1.050000 | -0.233857334 | 12.727559909  | 16.405069793 | 1 | 0 | 0 | # | ob  |
| 1003 | 12 | 3 | -1.050000 | -4.804200490 | 12.726845271  | 10.506543562 | 1 | 0 | 0 | # | ob  |
| 1004 | 12 | 3 | -1.050000 | -2.219640482 | 12.727122387  | 14.725300930 | 1 | 0 | 0 | # | ob  |
| 1005 | 12 | 4 | -0.950000 | -4.188982553 | 10.414157382  | 14.905911812 | 1 | 0 | 0 | # | oh  |
| 1006 | 12 | 4 | -0.950000 | -1.603729560 | 10.401464731  | 10.678860000 | 1 | 0 | 0 | # | oh  |
| 1007 | 12 | 3 | -1.050000 | -2.793809054 | 12.450593209  | 8.867196118  | 1 | 0 | 0 | # | ob  |
| 1008 | 12 | 3 | -1.050000 | -0.199524007 | 12.434440270  | 13.098538892 | 1 | 0 | 0 | # | ob  |
| 1009 | 12 | 7 | -0.950000 | -3.559434277 | 8.455610067   | 16.031829270 | 1 | 0 | 0 | # | oho |
| 1010 | 12 | 3 | -1.050000 | -4.962848515 | 6.422246611   | 13.612516698 | 1 | 0 | 0 | # | ob  |
| 1011 | 12 | 4 | -0.950000 | -0.973823532 | 8.443336781   | 11.805359607 | 1 | 0 | 0 | # | oh  |
| 1012 | 12 | 3 | -1.050000 | -2.369130266 | 6.406422954   | 9.393964434  | 1 | 0 | 0 | # | ob  |
| 1013 | 12 | 3 | -1.050000 | -4.162862728 | 10.475258613  | 11.803442278 | 1 | 0 | 0 | # | ob  |
| 1014 | 12 | 3 | -1.050000 | -1.589314866 | 10.482465238  | 16.037475661 | 1 | 0 | 0 | # | ob  |
| 1015 | 12 | 3 | -1.050000 | -0.606962377 | 8.364976708   | 9.131339972  | 1 | 0 | 0 | # | ob  |
| 1016 | 12 | 3 | -1.050000 | -4.929065415 | 6.129733707   | 10.305776368 | 1 | 0 | 0 | # | ob  |
| 1017 | 12 | 3 | -1.050000 | -2.355112729 | 6.133036431   | 14.533957725 | 1 | 0 | 0 | # | ob  |
| 1018 | 12 | 5 | 2.100000  | -4.285796523 | 12.104699038  | 11.902086522 | 1 | 0 | 0 | # | st  |
| 1019 | 12 | 5 | 2.100000  | -1.713770783 | 12.113680341  | 16.129979551 | 1 | 0 | 0 | # | st  |
| 1020 | 12 | 5 | 2.100000  | -0.790423949 | 6.746036608   | 9.193674984  | 1 | 0 | 0 | # | st  |
| 1021 | 12 | 5 | 2.100000  | -3.449066039 | 6.743339967   | 10.580878354 | 1 | 0 | 0 | # | st  |
| 1022 | 12 | 5 | 2.100000  | -0.876649750 | 6.752417420   | 14.808624273 | 1 | 0 | 0 | # | st  |
| 1023 | 12 | 5 | 2.100000  | -4.372521161 | 12.111149911  | 9.067561151  | 1 | 0 | 0 | # | st  |
| 1024 | 12 | 5 | 2.100000  | -1.784127332 | 12.107497425  | 13.289344045 | 1 | 0 | 0 | # | st  |
| 1025 | 12 | 5 | 2.100000  | -3.378381255 | 6.749404185   | 13.421378212 | 1 | 0 | 0 | # | st  |
| 1026 | 12 | 3 | -1.050000 | -4.556194217 | 10.492260884  | 17.579633991 | 1 | 0 | 0 | # | ob  |
| 1027 | 12 | 8 | -0.950000 | -4.804200490 | 12.726845271  | 18.956143562 | 1 | 0 | 0 | # | oht |
| 1028 | 12 | 3 | -1.050000 | -2.793809054 | 12.450593209  | 17.316796118 | 1 | 0 | 0 | # | ob  |
| 1029 | 12 | 5 | 2.100000  | -4.372521161 | 12.111149911  | 17.517611511 | 1 | 0 | 0 | # | st  |
| 1030 | 12 | 8 | -0.950000 | -0.316748817 | 6.750028849   | 16.634714390 | 1 | 0 | 0 | # | oht |
| 1031 | 12 | 6 | 0.425000  | -4.727361041 | 12.634198365  | 20.059598264 | 1 | 0 | 0 | # | do  |
| 1032 | 12 | 6 | 0.425000  | -0.704966564 | 6.850413767   | 17.669755394 | 1 | 0 | 0 | # | do  |
| 1033 | 13 | 1 | 1.575000  | 2.564951898  | -18.710342674 | 6.343147493  | 0 | 1 | 0 | # | ao  |
| 1034 | 13 | 1 | 1.575000  | 5.152091886  | -18.720367335 | 2.120047493  | 0 | 1 | 0 | # | ao  |
| 1035 | 13 | 1 | 1.575000  | 0.010475843  | -18.727185446 | 7.691610963  | 0 | 1 | 0 | # | ao  |
| 1036 | 13 | 1 | 1.575000  | 2.597479300  | -18.737173074 | 3.468502305  | 0 | 1 | 0 | # | ao  |
| 1037 | 13 | 2 | 0.425000  | 3.116355855  | -17.343036629 | 1.461851013  | 0 | 1 | 0 | # | ho  |
| 1038 | 13 | 2 | 0.425000  | 0.545922528  | -17.244695847 | 5.731312462  | 0 | 1 | 0 | # | ho  |
| 1039 | 13 | 2 | 0.425000  | 4.617664323  | 17.337409910  | 4.082601022  | 0 | 0 | 0 | # | ho  |
| 1040 | 13 | 2 | 0.425000  | 2.046067415  | 17.431442661  | 8.349425190  | 0 | 0 | 0 | # | ho  |
| 1041 | 13 | 3 | -1.050000 | 1.974320767  | -17.750750650 | 4.908780749  | 0 | 0 | 0 | # | ob  |
| 1042 | 13 | 3 | -1.050000 | 1.589283948  | -17.758665989 | 2.223829865  | 0 | 0 | 0 | # | ob  |
| 1043 | 13 | 3 | -1.050000 | 4.162820410  | -17.765964470 | 6.457577115  | 0 | 0 | 0 | # | ob  |
| 1044 | 13 | 3 | -1.050000 | 2.219750450  | -15.513870541 | 3.535812584  | 0 | 0 | 0 | # | ob  |
| 1045 | 13 | 3 | -1.050000 | 4.804343942  | -15.514671910 | 7.754751701  | 0 | 0 | 0 | # | ob  |
| 1046 | 13 | 3 | -1.050000 | 0.606605783  | -17.660039116 | 0.680433991  | 0 | 1 | 0 | # | ob  |
| 1047 | 13 | 3 | -1.050000 | 3.188175495  | -17.661884485 | 4.902851743  | 0 | 1 | 0 | # | ob  |
| 1048 | 13 | 3 | -1.050000 | 2.355525134  | -15.428256828 | 3.727147445  | 0 | 1 | 0 | # | ob  |
| 1049 | 13 | 3 | -1.050000 | 4.928942666  | -15.424740091 | 7.955469793  | 0 | 1 | 0 | # | ob  |
| 1050 | 13 | 3 | -1.050000 | 0.358599510  | -15.425454729 | 2.056943562  | 0 | 1 | 0 | # | ob  |
| 1051 | 13 | 3 | -1.050000 | 2.943159518  | -15.425177613 | 6.275700930  | 0 | 1 | 0 | # | ob  |
| 1052 | 13 | 4 | -0.950000 | 0.973817447  | -17.738142618 | 6.456311812  | 0 | 1 | 0 | # | oh  |
| 1053 | 13 | 4 | -0.950000 | 3.559070440  | -17.750835269 | 2.229260000  | 0 | 1 | 0 | # | oh  |
| 1054 | 13 | 3 | -1.050000 | 2.368990946  | -15.701706791 | 0.417596118  | 0 | 1 | 0 | # | ob  |
| 1055 | 13 | 3 | -1.050000 | 4.963275993  | -15.717859730 | 4.648938892  | 0 | 1 | 0 | # | ob  |
| 1056 | 13 | 4 | -0.950000 | 1.603365723  | 17.839710067  | 7.582229270  | 0 | 0 | 0 | # | oh  |
| 1057 | 13 | 3 | -1.050000 | 0.199951485  | 15.806346611  | 5.162916698  | 0 | 0 | 0 | # | ob  |
| 1058 | 13 | 4 | -0.950000 | 4.188976468  | 17.827436781  | 3.355759607  | 0 | 0 | 0 | # | oh  |
| 1059 | 13 | 3 | -1.050000 | 2.793669734  | 15.790522954  | 0.944364434  | 0 | 0 | 0 | # | ob  |
| 1060 | 13 | 3 | -1.050000 | 0.999937272  | -17.677041387 | 3.353842278  | 0 | 1 | 0 | # | ob  |
| 1061 | 13 | 3 | -1.050000 | 3.573485134  | -17.669834762 | 7.587856661  | 0 | 1 | 0 | # | ob  |
| 1062 | 13 | 3 | -1.050000 | 4.555837623  | -17.749076708 | 0.681739972  | 0 | 0 | 0 | # | ob  |
| 1063 | 13 | 3 | -1.050000 | 0.233734585  | 15.513833707  | 1.856176368  | 0 | 0 | 0 | # | ob  |
| 1064 | 13 | 3 | -1.050000 | 2.807687271  | 15.517136431  | 6.084357725  | 0 | 0 | 0 | # | ob  |
| 1065 | 13 | 5 | 2.100000  | 0.877003477  | -16.047600962 | 3.452486522  | 0 | 1 | 0 | # | st  |
| 1066 | 13 | 5 | 2.100000  | 3.449029217  | -16.038619659 | 7.680379551  | 0 | 1 | 0 | # | st  |
| 1067 | 13 | 5 | 2.100000  | 4.372376051  | 16.130136608  | 0.744074984  | 0 | 0 | 0 | # | st  |
| 1068 | 13 | 5 | 2.100000  | 1.713733961  | 16.127439967  | 2.131278354  | 0 | 0 | 0 | # | st  |
| 1069 | 13 | 5 | 2.100000  | 4.286150250  | 16.136517420  | 6.359024273  | 0 | 0 | 0 | # | st  |
| 1070 | 13 | 5 | 2.100000  | 0.790278839  | -16.041150089 | 0.617961151  | 0 | 1 | 0 | # | st  |
| 1071 | 13 | 5 | 2.100000  | 3.378672668  | -16.044802575 | 4.839744045  | 0 | 1 | 0 | # | st  |
| 1072 | 13 | 5 | 2.100000  | 1.784418745  | 16.133504185  | 4.971778212  | 0 | 0 | 0 | # | st  |
| 1073 | 13 | 1 | 1.575000  | 2.564951898  | -18.710342674 | 14.792747493 | 0 | 1 | 0 | # | ao  |
| 1074 | 13 | 1 | 1.575000  | 5.152091886  | -18.720367335 | 10.569647493 | 0 | 1 | 0 | # | ao  |
| 1075 | 13 | 1 | 1.575000  | 0.010475843  | -18.727185446 | 16.141210963 | 0 | 1 | 0 | # | ao  |
| 1076 | 13 | 1 | 1.575000  | 2.597479300  | -18.737173074 | 11.918102305 | 0 | 1 | 0 | # | ao  |

|      |    |   |           |              |               |              |   |   |   |   |     |
|------|----|---|-----------|--------------|---------------|--------------|---|---|---|---|-----|
| 1077 | 13 | 2 | 0.425000  | 3.116355855  | -17.343036629 | 9.911451013  | 0 | 1 | 0 | # | ho  |
| 1078 | 13 | 2 | 0.425000  | 0.545922528  | -17.244695847 | 14.180912462 | 0 | 1 | 0 | # | ho  |
| 1079 | 13 | 2 | 0.425000  | 4.617664323  | 17.337409910  | 12.532201022 | 0 | 0 | 0 | # | ho  |
| 1080 | 13 | 6 | 0.425000  | 2.046067415  | 17.431442661  | 16.799025190 | 0 | 0 | 0 | # | do  |
| 1081 | 13 | 3 | -1.050000 | 1.974320767  | 17.750750650  | 13.358380749 | 0 | 0 | 0 | # | ob  |
| 1082 | 13 | 3 | -1.050000 | 1.589283948  | 17.758665989  | 10.673429865 | 0 | 0 | 0 | # | ob  |
| 1083 | 13 | 3 | -1.050000 | 4.162820410  | 17.765964470  | 14.907177115 | 0 | 0 | 0 | # | ob  |
| 1084 | 13 | 3 | -1.050000 | 2.219750450  | 15.513870541  | 11.985412584 | 0 | 0 | 0 | # | ob  |
| 1085 | 13 | 3 | -1.050000 | 0.606605783  | -17.660039116 | 9.130033991  | 0 | 1 | 0 | # | ob  |
| 1086 | 13 | 3 | -1.050000 | 3.188175495  | -17.661884485 | 13.352451743 | 0 | 1 | 0 | # | ob  |
| 1087 | 13 | 3 | -1.050000 | 2.355525134  | -15.428256828 | 12.176747445 | 0 | 1 | 0 | # | ob  |
| 1088 | 13 | 3 | -1.050000 | 4.928942666  | -15.424740091 | 16.405069793 | 0 | 1 | 0 | # | ob  |
| 1089 | 13 | 3 | -1.050000 | 0.358599510  | -15.425454729 | 10.506543562 | 0 | 1 | 0 | # | ob  |
| 1090 | 13 | 3 | -1.050000 | 2.943159518  | -15.425177613 | 14.725300930 | 0 | 1 | 0 | # | ob  |
| 1091 | 13 | 4 | -0.950000 | 0.973817447  | -17.738142618 | 14.905911812 | 0 | 1 | 0 | # | oh  |
| 1092 | 13 | 4 | -0.950000 | 3.559070440  | -17.750835269 | 10.678860000 | 0 | 1 | 0 | # | oh  |
| 1093 | 13 | 3 | -1.050000 | 2.368990946  | -15.701706791 | 8.867196118  | 0 | 1 | 0 | # | ob  |
| 1094 | 13 | 3 | -1.050000 | 4.963275993  | -15.717859730 | 13.098538892 | 0 | 1 | 0 | # | ob  |
| 1095 | 13 | 7 | -0.950000 | 1.603365723  | 17.839710067  | 16.031829270 | 0 | 0 | 0 | # | oho |
| 1096 | 13 | 3 | -1.050000 | 0.199951485  | 15.806346611  | 13.612516698 | 0 | 0 | 0 | # | ob  |
| 1097 | 13 | 4 | -0.950000 | 4.188976468  | 17.827436781  | 11.805359607 | 0 | 0 | 0 | # | oh  |
| 1098 | 13 | 3 | -1.050000 | 2.793669734  | 15.790522954  | 9.393964434  | 0 | 0 | 0 | # | ob  |
| 1099 | 13 | 3 | -1.050000 | 0.999937272  | -17.677041387 | 11.803442278 | 0 | 1 | 0 | # | ob  |
| 1100 | 13 | 3 | -1.050000 | 3.573485134  | -17.669834762 | 16.037475661 | 0 | 1 | 0 | # | ob  |
| 1101 | 13 | 3 | -1.050000 | 4.555837623  | 17.749076708  | 9.131339972  | 0 | 0 | 0 | # | ob  |
| 1102 | 13 | 3 | -1.050000 | 0.233734585  | 15.513833707  | 10.305776368 | 0 | 0 | 0 | # | ob  |
| 1103 | 13 | 3 | -1.050000 | 2.807687271  | 15.517136431  | 14.533957725 | 0 | 0 | 0 | # | ob  |
| 1104 | 13 | 5 | 2.100000  | 0.877003477  | -16.047600962 | 11.902086522 | 0 | 1 | 0 | # | st  |
| 1105 | 13 | 5 | 2.100000  | 3.449029217  | -16.038619659 | 16.129979551 | 0 | 1 | 0 | # | st  |
| 1106 | 13 | 5 | 2.100000  | 4.372376051  | 16.130136608  | 9.193674984  | 0 | 0 | 0 | # | st  |
| 1107 | 13 | 5 | 2.100000  | 1.713733961  | 16.127439967  | 10.580878354 | 0 | 0 | 0 | # | st  |
| 1108 | 13 | 5 | 2.100000  | 4.286150250  | 16.136517420  | 14.808624273 | 0 | 0 | 0 | # | st  |
| 1109 | 13 | 5 | 2.100000  | 0.790278839  | -16.041150089 | 9.067561151  | 0 | 1 | 0 | # | st  |
| 1110 | 13 | 5 | 2.100000  | 3.378672668  | -16.044802575 | 13.289344045 | 0 | 1 | 0 | # | st  |
| 1111 | 13 | 5 | 2.100000  | 1.784418745  | 16.133504185  | 13.421378212 | 0 | 0 | 0 | # | st  |
| 1112 | 13 | 3 | -1.050000 | 0.606605783  | -17.660039116 | 17.579633991 | 0 | 1 | 0 | # | ob  |
| 1113 | 13 | 8 | -0.950000 | 0.358599510  | -15.425454729 | 18.956143562 | 0 | 1 | 0 | # | oht |
| 1114 | 13 | 3 | -1.050000 | 2.368990946  | -15.701706791 | 17.316796118 | 0 | 1 | 0 | # | ob  |
| 1115 | 13 | 5 | 2.100000  | 0.790278839  | -16.041150089 | 17.517161151 | 0 | 1 | 0 | # | st  |
| 1116 | 13 | 8 | -0.950000 | 4.846051183  | 16.134128849  | 16.634714390 | 0 | 0 | 0 | # | oht |
| 1117 | 13 | 6 | 0.425000  | 0.435438959  | -15.518101635 | 20.059598264 | 0 | 1 | 0 | # | do  |
| 1118 | 13 | 6 | 0.425000  | 4.457833436  | 16.234513767  | 17.669755394 | 0 | 0 | 0 | # | do  |
| 1119 | 14 | 1 | 1.575000  | 7.727751898  | -18.710342674 | 6.343147493  | 0 | 1 | 0 | # | ao  |
| 1120 | 14 | 1 | 1.575000  | 10.314891886 | -18.720367335 | 2.120047493  | 0 | 1 | 0 | # | ao  |
| 1121 | 14 | 1 | 1.575000  | 5.173275843  | -18.727185446 | 7.691610963  | 0 | 1 | 0 | # | ao  |
| 1122 | 14 | 1 | 1.575000  | 7.760279300  | -18.737173074 | 3.468502305  | 0 | 1 | 0 | # | ao  |
| 1123 | 14 | 2 | 0.425000  | 8.279155855  | -17.343036629 | 1.461851013  | 0 | 1 | 0 | # | ho  |
| 1124 | 14 | 2 | 0.425000  | 5.708722528  | -17.244695847 | 5.731312462  | 0 | 1 | 0 | # | ho  |
| 1125 | 14 | 2 | 0.425000  | 9.780464323  | 17.337409910  | 4.082601022  | 0 | 0 | 0 | # | ho  |
| 1126 | 14 | 2 | 0.425000  | 7.208867415  | 17.431442661  | 8.349425190  | 0 | 0 | 0 | # | ho  |
| 1127 | 14 | 3 | -1.050000 | 7.137120767  | 17.750750650  | 4.908780749  | 0 | 0 | 0 | # | ob  |
| 1128 | 14 | 3 | -1.050000 | 6.752083948  | 17.758665989  | 2.223829865  | 0 | 0 | 0 | # | ob  |
| 1129 | 14 | 3 | -1.050000 | 9.325620410  | 17.765964470  | 6.457577115  | 0 | 0 | 0 | # | ob  |
| 1130 | 14 | 3 | -1.050000 | 7.382550450  | 15.513870541  | 3.535812584  | 0 | 0 | 0 | # | ob  |
| 1131 | 14 | 3 | -1.050000 | 9.967143942  | 15.514671910  | 7.754751701  | 0 | 0 | 0 | # | ob  |
| 1132 | 14 | 3 | -1.050000 | 5.769405783  | -17.660039116 | 0.680433991  | 0 | 1 | 0 | # | ob  |
| 1133 | 14 | 3 | -1.050000 | 8.350975495  | -17.661884485 | 4.902851743  | 0 | 1 | 0 | # | ob  |
| 1134 | 14 | 3 | -1.050000 | 7.518325134  | -15.428256828 | 3.727147445  | 0 | 1 | 0 | # | ob  |
| 1135 | 14 | 3 | -1.050000 | 10.091742666 | -15.424740091 | 7.955469793  | 0 | 1 | 0 | # | ob  |
| 1136 | 14 | 3 | -1.050000 | 5.521399510  | -15.425454729 | 2.056943562  | 0 | 1 | 0 | # | ob  |
| 1137 | 14 | 3 | -1.050000 | 8.105959518  | -15.425177613 | 6.275700930  | 0 | 1 | 0 | # | ob  |
| 1138 | 14 | 4 | -0.950000 | 6.136617447  | -17.738142618 | 6.456311812  | 0 | 1 | 0 | # | oh  |
| 1139 | 14 | 4 | -0.950000 | 8.721870440  | -17.750835269 | 2.229260000  | 0 | 1 | 0 | # | oh  |
| 1140 | 14 | 3 | -1.050000 | 7.531790946  | -15.701706791 | 0.417596118  | 0 | 1 | 0 | # | ob  |
| 1141 | 14 | 3 | -1.050000 | 10.126075993 | -15.717859730 | 4.648938892  | 0 | 1 | 0 | # | ob  |
| 1142 | 14 | 4 | -0.950000 | 6.766165723  | 17.839710067  | 7.582229270  | 0 | 0 | 0 | # | oh  |
| 1143 | 14 | 3 | -1.050000 | 5.362751485  | 15.806346611  | 5.162916698  | 0 | 0 | 0 | # | ob  |
| 1144 | 14 | 4 | -0.950000 | 9.351776468  | 17.827436781  | 3.355759607  | 0 | 0 | 0 | # | oh  |
| 1145 | 14 | 3 | -1.050000 | 7.956469734  | 15.790522954  | 0.944364434  | 0 | 0 | 0 | # | ob  |
| 1146 | 14 | 3 | -1.050000 | 6.162737272  | -17.677041387 | 3.353842278  | 0 | 1 | 0 | # | ob  |
| 1147 | 14 | 3 | -1.050000 | 8.736285134  | -17.669834762 | 7.587875661  | 0 | 1 | 0 | # | ob  |
| 1148 | 14 | 3 | -1.050000 | 9.718637623  | 17.749076708  | 0.681739972  | 0 | 0 | 0 | # | ob  |
| 1149 | 14 | 3 | -1.050000 | 5.396534585  | 15.513833707  | 1.856176368  | 0 | 0 | 0 | # | ob  |
| 1150 | 14 | 3 | -1.050000 | 7.970487271  | 15.517136431  | 6.084357725  | 0 | 0 | 0 | # | ob  |
| 1151 | 14 | 5 | 2.100000  | 6.039803477  | -16.047600962 | 3.452486522  | 0 | 1 | 0 | # | st  |
| 1152 | 14 | 5 | 2.100000  | 8.611829217  | -16.038619659 | 7.680379551  | 0 | 1 | 0 | # | st  |
| 1153 | 14 | 5 | 2.100000  | 9.535176051  | 16.130136608  | 0.744074984  | 0 | 0 | 0 | # | st  |
| 1154 | 14 | 5 | 2.100000  | 6.876533961  | 16.127439967  | 2.131278354  | 0 | 0 | 0 | # | st  |
| 1155 | 14 | 5 | 2.100000  | 9.448950250  | 16.136517420  | 6.359024273  | 0 | 0 | 0 | # | st  |
| 1156 | 14 | 5 | 2.100000  | 5.953078839  | -16.041150089 | 0.617961151  | 0 | 1 | 0 | # | st  |
| 1157 | 14 | 5 | 2.100000  | 8.541472668  | -16.044802575 | 4.839744045  | 0 | 1 | 0 | # | st  |
| 1158 | 14 | 5 | 2.100000  | 6.947218745  | 16.133504185  | 4.971778212  | 0 | 0 | 0 | # | st  |
| 1159 | 14 | 1 | 1.575000  | 7.727751898  | -18.710342674 | 14.792747493 | 0 | 1 | 0 | # | ao  |
| 1160 | 14 | 1 | 1.575000  | 10.314891886 | -18.720367335 | 10.569647493 | 0 | 1 | 0 | # | ao  |
| 1161 | 14 | 1 | 1.575000  | 5.173275843  | -18.727185446 | 16.141210963 | 0 | 1 | 0 | # | ao  |
| 1162 | 14 | 1 | 1.575000  | 7.760279300  | -18.737173074 | 11.918102305 | 0 | 1 | 0 | # | ao  |
| 1163 | 14 | 2 | 0.425000  | 8.279155855  | -17.343036629 | 9.911451013  | 0 | 1 | 0 | # | ho  |
| 1164 | 14 | 2 | 0.425000  | 5.708722528  | -17.244695847 | 14.180912462 | 0 | 1 | 0 | # | ho  |
| 1165 | 14 | 2 | 0.425000  | 9.780464323  | 17.337409910  | 12.532201022 | 0 | 0 | 0 | # | ho  |
| 1166 | 14 | 6 | 0.425000  | 7.208867415  | 17.431442661  | 16.799025190 | 0 | 0 | 0 | # | do  |
| 1167 | 14 | 3 | -1.050000 | 7.137120767  | 17.750750650  | 13.358380749 | 0 | 0 | 0 | # | ob  |
| 1168 | 14 | 3 | -1.050000 | 6.752083948  | 17.758665989  | 10.673429865 | 0 | 0 | 0 | # | ob  |
| 1169 | 14 | 3 | -1.050000 | 9.325620410  | 17.765964470  | 14.907177115 | 0 | 0 | 0 | # | ob  |

|      |    |   |           |              |               |              |   |   |   |   |     |
|------|----|---|-----------|--------------|---------------|--------------|---|---|---|---|-----|
| 1170 | 14 | 3 | -1.050000 | 7.382550450  | 15.513870541  | 11.985412584 | 0 | 0 | 0 | # | ob  |
| 1171 | 14 | 3 | -1.050000 | 5.769405783  | -17.660039116 | 9.130033991  | 0 | 1 | 0 | # | ob  |
| 1172 | 14 | 3 | -1.050000 | 8.350975495  | -17.661884485 | 13.352451743 | 0 | 1 | 0 | # | ob  |
| 1173 | 14 | 3 | -1.050000 | 7.518325134  | -15.428256828 | 12.176747445 | 0 | 1 | 0 | # | ob  |
| 1174 | 14 | 3 | -1.050000 | 10.091742666 | -15.424740091 | 16.405069793 | 0 | 1 | 0 | # | ob  |
| 1175 | 14 | 3 | -1.050000 | 5.521399510  | -15.425454729 | 10.506543562 | 0 | 1 | 0 | # | ob  |
| 1176 | 14 | 3 | -1.050000 | 8.105959518  | -15.425177613 | 14.725300930 | 0 | 1 | 0 | # | ob  |
| 1177 | 14 | 4 | -0.950000 | 6.136617447  | -17.738142618 | 14.905911812 | 0 | 1 | 0 | # | oh  |
| 1178 | 14 | 4 | -0.950000 | 8.721870440  | -17.750835269 | 10.678860000 | 0 | 1 | 0 | # | oh  |
| 1179 | 14 | 3 | -1.050000 | 7.531790946  | -15.701706791 | 8.867196118  | 0 | 1 | 0 | # | ob  |
| 1180 | 14 | 3 | -1.050000 | 10.126075993 | -15.717859730 | 13.098538892 | 0 | 1 | 0 | # | ob  |
| 1181 | 14 | 7 | -0.950000 | 6.766165723  | 17.839710067  | 16.031829270 | 0 | 0 | 0 | # | oho |
| 1182 | 14 | 3 | -1.050000 | 5.362751485  | 15.806346611  | 13.612516698 | 0 | 0 | 0 | # | ob  |
| 1183 | 14 | 4 | -0.950000 | 9.351776468  | 17.827436781  | 11.805359607 | 0 | 0 | 0 | # | oh  |
| 1184 | 14 | 3 | -1.050000 | 7.956469734  | 15.790522954  | 9.393964434  | 0 | 0 | 0 | # | ob  |
| 1185 | 14 | 3 | -1.050000 | 6.162737272  | -17.677041387 | 11.803442278 | 0 | 1 | 0 | # | ob  |
| 1186 | 14 | 3 | -1.050000 | 8.736285134  | -17.669834762 | 16.037475661 | 0 | 1 | 0 | # | ob  |
| 1187 | 14 | 3 | -1.050000 | 9.718637623  | 17.749076708  | 9.131339972  | 0 | 0 | 0 | # | ob  |
| 1188 | 14 | 3 | -1.050000 | 5.396534585  | 15.513833707  | 10.305776368 | 0 | 0 | 0 | # | ob  |
| 1189 | 14 | 3 | -1.050000 | 7.970487271  | 15.517136431  | 14.533957725 | 0 | 0 | 0 | # | ob  |
| 1190 | 14 | 5 | 2.100000  | 6.039803477  | -16.047600962 | 11.902086522 | 0 | 1 | 0 | # | st  |
| 1191 | 14 | 5 | 2.100000  | 8.611829217  | -16.038619659 | 16.129979551 | 0 | 1 | 0 | # | st  |
| 1192 | 14 | 5 | 2.100000  | 9.535176051  | 16.130136608  | 9.193674984  | 0 | 0 | 0 | # | st  |
| 1193 | 14 | 5 | 2.100000  | 6.876533961  | 16.127439967  | 10.580878354 | 0 | 0 | 0 | # | st  |
| 1194 | 14 | 5 | 2.100000  | 9.448950250  | 16.136517420  | 14.808624273 | 0 | 0 | 0 | # | st  |
| 1195 | 14 | 5 | 2.100000  | 5.953078839  | -16.041150089 | 9.067561151  | 0 | 1 | 0 | # | st  |
| 1196 | 14 | 5 | 2.100000  | 8.541472668  | -16.044802575 | 13.289344045 | 0 | 1 | 0 | # | st  |
| 1197 | 14 | 5 | 2.100000  | 6.947218745  | 16.133504185  | 13.421378212 | 0 | 0 | 0 | # | st  |
| 1198 | 14 | 3 | -1.050000 | 5.769405783  | -17.660039116 | 17.579633991 | 0 | 1 | 0 | # | ob  |
| 1199 | 14 | 8 | -0.950000 | 5.521399510  | -15.425454729 | 18.956143562 | 0 | 1 | 0 | # | oht |
| 1200 | 14 | 3 | -1.050000 | 7.531790946  | -15.701706791 | 17.316796118 | 0 | 1 | 0 | # | ob  |
| 1201 | 14 | 5 | 2.100000  | 5.953078839  | -16.041150089 | 17.51761151  | 0 | 1 | 0 | # | st  |
| 1202 | 14 | 8 | -0.950000 | 10.008851183 | 16.134128849  | 16.634714390 | 0 | 0 | 0 | # | oht |
| 1203 | 14 | 6 | 0.425000  | 5.598238959  | -15.518101635 | 20.059598264 | 0 | 1 | 0 | # | do  |
| 1204 | 14 | 6 | 0.425000  | 9.620633436  | 16.234513767  | 17.669755394 | 0 | 0 | 0 | # | do  |
| 1205 | 15 | 1 | 1.575000  | 12.890551898 | -18.710342674 | 6.343147493  | 0 | 1 | 0 | # | ao  |
| 1206 | 15 | 1 | 1.575000  | 15.477691886 | -18.720367335 | 2.120047493  | 0 | 1 | 0 | # | ao  |
| 1207 | 15 | 1 | 1.575000  | 10.336075843 | -18.727185446 | 7.691610963  | 0 | 1 | 0 | # | ao  |
| 1208 | 15 | 1 | 1.575000  | 12.923079300 | -18.737173074 | 3.468502305  | 0 | 1 | 0 | # | ao  |
| 1209 | 15 | 2 | 0.425000  | 13.441955855 | -17.343036629 | 1.461851013  | 0 | 1 | 0 | # | ho  |
| 1210 | 15 | 2 | 0.425000  | 10.871522528 | -17.244695847 | 5.731312462  | 0 | 1 | 0 | # | ho  |
| 1211 | 15 | 2 | 0.425000  | 14.943264323 | 17.337409910  | 4.082601022  | 0 | 0 | 0 | # | ho  |
| 1212 | 15 | 2 | 0.425000  | 12.371667415 | 17.431442661  | 8.349425190  | 0 | 0 | 0 | # | ho  |
| 1213 | 15 | 3 | -1.050000 | 12.299920767 | 17.750750650  | 4.908780749  | 0 | 0 | 0 | # | ob  |
| 1214 | 15 | 3 | -1.050000 | 11.914883948 | 17.758665989  | 2.223829865  | 0 | 0 | 0 | # | ob  |
| 1215 | 15 | 3 | -1.050000 | 14.488420410 | 17.765964470  | 6.457577115  | 0 | 0 | 0 | # | ob  |
| 1216 | 15 | 3 | -1.050000 | 12.545350450 | 15.513870541  | 3.535812584  | 0 | 0 | 0 | # | ob  |
| 1217 | 15 | 3 | -1.050000 | 15.129943942 | 15.514671910  | 7.754751701  | 0 | 0 | 0 | # | ob  |
| 1218 | 15 | 3 | -1.050000 | 10.932205783 | -17.660039116 | 0.680433991  | 0 | 1 | 0 | # | ob  |
| 1219 | 15 | 3 | -1.050000 | 13.513775495 | -17.661884485 | 4.902851743  | 0 | 1 | 0 | # | ob  |
| 1220 | 15 | 3 | -1.050000 | 12.681125134 | -15.428256828 | 3.727147445  | 0 | 1 | 0 | # | ob  |
| 1221 | 15 | 3 | -1.050000 | 15.254542666 | -15.424740091 | 7.955469793  | 0 | 1 | 0 | # | ob  |
| 1222 | 15 | 3 | -1.050000 | 10.684199510 | -15.425454729 | 2.056943562  | 0 | 1 | 0 | # | ob  |
| 1223 | 15 | 3 | -1.050000 | 13.268759518 | -15.425177613 | 6.275700930  | 0 | 1 | 0 | # | ob  |
| 1224 | 15 | 4 | -0.950000 | 11.299417447 | -17.738142618 | 6.456311812  | 0 | 1 | 0 | # | oh  |
| 1225 | 15 | 4 | -0.950000 | 13.884670440 | -17.750835269 | 2.229260000  | 0 | 1 | 0 | # | oh  |
| 1226 | 15 | 3 | -1.050000 | 12.694590946 | -15.701706791 | 0.417596118  | 0 | 1 | 0 | # | ob  |
| 1227 | 15 | 3 | -1.050000 | 15.288875993 | -15.717859730 | 4.648938892  | 0 | 1 | 0 | # | ob  |
| 1228 | 15 | 4 | -0.950000 | 11.928965723 | 17.839710067  | 7.582229270  | 0 | 0 | 0 | # | oh  |
| 1229 | 15 | 3 | -1.050000 | 10.525551485 | 15.806346611  | 5.162916698  | 0 | 0 | 0 | # | ob  |
| 1230 | 15 | 4 | -0.950000 | 14.514576468 | 17.827436781  | 3.355759607  | 0 | 0 | 0 | # | oh  |
| 1231 | 15 | 3 | -1.050000 | 13.119269734 | 15.790522954  | 0.944364434  | 0 | 0 | 0 | # | ob  |
| 1232 | 15 | 3 | -1.050000 | 11.325537272 | -17.677041387 | 3.353842278  | 0 | 1 | 0 | # | ob  |
| 1233 | 15 | 3 | -1.050000 | 13.899085134 | -17.669834762 | 7.587875661  | 0 | 1 | 0 | # | ob  |
| 1234 | 15 | 3 | -1.050000 | 14.881437623 | 17.749076708  | 0.681739972  | 0 | 0 | 0 | # | ob  |
| 1235 | 15 | 3 | -1.050000 | 10.559334585 | 15.513833707  | 1.856176368  | 0 | 0 | 0 | # | ob  |
| 1236 | 15 | 3 | -1.050000 | 13.133287271 | 15.517136431  | 6.084357725  | 0 | 0 | 0 | # | ob  |
| 1237 | 15 | 5 | 2.100000  | 11.202603477 | -16.047600962 | 3.452486522  | 0 | 1 | 0 | # | st  |
| 1238 | 15 | 5 | 2.100000  | 13.774629217 | -16.038619659 | 7.680379551  | 0 | 1 | 0 | # | st  |
| 1239 | 15 | 5 | 2.100000  | 14.697976051 | 16.130136608  | 0.744074984  | 0 | 0 | 0 | # | st  |
| 1240 | 15 | 5 | 2.100000  | 12.039333961 | 16.127439967  | 2.131278354  | 0 | 0 | 0 | # | st  |
| 1241 | 15 | 5 | 2.100000  | 14.611750250 | 16.136517420  | 6.359024273  | 0 | 0 | 0 | # | st  |
| 1242 | 15 | 5 | 2.100000  | 11.115878839 | -16.041150089 | 0.617961151  | 0 | 1 | 0 | # | st  |
| 1243 | 15 | 5 | 2.100000  | 13.704272668 | -16.044802575 | 4.839744045  | 0 | 1 | 0 | # | st  |
| 1244 | 15 | 5 | 2.100000  | 12.110018745 | 16.133504185  | 4.971778212  | 0 | 0 | 0 | # | st  |
| 1245 | 15 | 1 | 1.575000  | 12.890551898 | -18.710342674 | 14.792747493 | 0 | 1 | 0 | # | ao  |
| 1246 | 15 | 1 | 1.575000  | 15.477691886 | -18.720367335 | 10.569647493 | 0 | 1 | 0 | # | ao  |
| 1247 | 15 | 1 | 1.575000  | 10.336075843 | -18.727185446 | 16.141210963 | 0 | 1 | 0 | # | ao  |
| 1248 | 15 | 1 | 1.575000  | 12.923079300 | -18.737173074 | 11.918102305 | 0 | 1 | 0 | # | ao  |
| 1249 | 15 | 2 | 0.425000  | 13.441955855 | -17.343036629 | 9.911451013  | 0 | 1 | 0 | # | ho  |
| 1250 | 15 | 2 | 0.425000  | 10.871522528 | -17.244695847 | 14.180912462 | 0 | 1 | 0 | # | ho  |
| 1251 | 15 | 2 | 0.425000  | 14.943264323 | 17.337409910  | 12.532201022 | 0 | 0 | 0 | # | ho  |
| 1252 | 15 | 6 | 0.425000  | 12.371667415 | 17.431442661  | 16.799025190 | 0 | 0 | 0 | # | do  |
| 1253 | 15 | 3 | -1.050000 | 12.299920767 | 17.750750650  | 13.358380749 | 0 | 0 | 0 | # | ob  |
| 1254 | 15 | 3 | -1.050000 | 11.914883948 | 17.758665989  | 10.673429865 | 0 | 0 | 0 | # | ob  |
| 1255 | 15 | 3 | -1.050000 | 14.488420410 | 17.765964470  | 14.907177115 | 0 | 0 | 0 | # | ob  |
| 1256 | 15 | 3 | -1.050000 | 12.545350450 | 15.513870541  | 11.985412584 | 0 | 0 | 0 | # | ob  |
| 1257 | 15 | 3 | -1.050000 | 10.932205783 | -17.660039116 | 9.130033991  | 0 | 1 | 0 | # | ob  |
| 1258 | 15 | 3 | -1.050000 | 13.513775495 | -17.661884485 | 13.352451743 | 0 | 1 | 0 | # | ob  |
| 1259 | 15 | 3 | -1.050000 | 12.681125134 | -15.428256828 | 12.176747445 | 0 | 1 | 0 | # | ob  |
| 1260 | 15 | 3 | -1.050000 | 15.254542666 | -15.424740091 | 16.405069793 | 0 | 1 | 0 | # | ob  |
| 1261 | 15 | 3 | -1.050000 | 10.684199510 | -15.425454729 | 10.506543562 | 0 | 1 | 0 | # | ob  |
| 1262 | 15 | 3 | -1.050000 | 13.268759518 | -15.425177613 | 14.725300930 | 0 | 1 | 0 | # | ob  |

|      |    |   |           |               |               |              |   |   |   |   |     |
|------|----|---|-----------|---------------|---------------|--------------|---|---|---|---|-----|
| 1263 | 15 | 4 | -0.950000 | 11.299417447  | -17.738142618 | 14.905911812 | 0 | 1 | 0 | # | oh  |
| 1264 | 15 | 4 | -0.950000 | 13.884670440  | -17.750835269 | 10.678860000 | 0 | 1 | 0 | # | oh  |
| 1265 | 15 | 3 | -1.050000 | 12.694590946  | -15.701706791 | 8.867196118  | 0 | 1 | 0 | # | ob  |
| 1266 | 15 | 3 | -1.050000 | 15.288875993  | -15.717859730 | 13.098538892 | 0 | 1 | 0 | # | ob  |
| 1267 | 15 | 7 | -0.950000 | 11.928965723  | 17.839710067  | 16.031829270 | 0 | 0 | 0 | # | oho |
| 1268 | 15 | 3 | -1.050000 | 10.525551485  | 15.806346611  | 13.612516698 | 0 | 0 | 0 | # | ob  |
| 1269 | 15 | 4 | -0.950000 | 14.514576468  | 17.827436781  | 11.805359607 | 0 | 0 | 0 | # | oh  |
| 1270 | 15 | 3 | -1.050000 | 13.119269734  | 15.790522954  | 9.9393964434 | 0 | 0 | 0 | # | ob  |
| 1271 | 15 | 3 | -1.050000 | 11.325537272  | -17.677041387 | 11.803442278 | 0 | 1 | 0 | # | ob  |
| 1272 | 15 | 3 | -1.050000 | 13.899085134  | -17.669834762 | 16.037475661 | 0 | 1 | 0 | # | ob  |
| 1273 | 15 | 3 | -1.050000 | 14.881437623  | 17.749076708  | 9.131339972  | 0 | 0 | 0 | # | ob  |
| 1274 | 15 | 3 | -1.050000 | 10.559334585  | 15.513833707  | 10.305776368 | 0 | 0 | 0 | # | ob  |
| 1275 | 15 | 3 | -1.050000 | 13.133287271  | 15.517136431  | 14.533957725 | 0 | 0 | 0 | # | ob  |
| 1276 | 15 | 5 | 2.100000  | 11.202603477  | -16.047600962 | 11.902086522 | 0 | 1 | 0 | # | st  |
| 1277 | 15 | 5 | 2.100000  | 13.774629217  | -16.038619659 | 16.129979551 | 0 | 1 | 0 | # | st  |
| 1278 | 15 | 5 | 2.100000  | 14.697976051  | 16.130136608  | 9.193674984  | 0 | 0 | 0 | # | st  |
| 1279 | 15 | 5 | 2.100000  | 12.039333961  | 16.127439967  | 10.580878354 | 0 | 0 | 0 | # | st  |
| 1280 | 15 | 5 | 2.100000  | 14.611750250  | 16.136517420  | 14.808624273 | 0 | 0 | 0 | # | st  |
| 1281 | 15 | 5 | 2.100000  | 11.115878839  | -16.041150089 | 9.067561151  | 0 | 1 | 0 | # | st  |
| 1282 | 15 | 5 | 2.100000  | 13.704272668  | -16.044802575 | 13.289344045 | 0 | 1 | 0 | # | st  |
| 1283 | 15 | 5 | 2.100000  | 12.110018745  | 16.133504185  | 13.421378212 | 0 | 0 | 0 | # | st  |
| 1284 | 15 | 3 | -1.050000 | 10.932205783  | -17.660039116 | 17.579633991 | 0 | 1 | 0 | # | ob  |
| 1285 | 15 | 8 | -0.950000 | 10.684199510  | -15.425454729 | 18.956143562 | 0 | 1 | 0 | # | oht |
| 1286 | 15 | 3 | -1.050000 | 12.694590946  | -15.701706791 | 17.316796118 | 0 | 1 | 0 | # | ob  |
| 1287 | 15 | 5 | 2.100000  | 11.115878839  | -16.041150089 | 17.517161151 | 0 | 1 | 0 | # | st  |
| 1288 | 15 | 8 | -0.950000 | 15.171651183  | 16.134128849  | 16.634714390 | 0 | 0 | 0 | # | oht |
| 1289 | 15 | 6 | 0.425000  | 10.761038959  | -15.518101635 | 20.059598264 | 0 | 1 | 0 | # | do  |
| 1290 | 15 | 6 | 0.425000  | 14.783433436  | 16.234513767  | 17.669755394 | 0 | 0 | 0 | # | do  |
| 1291 | 16 | 1 | 1.575000  | -12.923448102 | -18.710342674 | 6.343147493  | 1 | 1 | 0 | # | ao  |
| 1292 | 16 | 1 | 1.575000  | -10.336308114 | -18.720367335 | 2.120047493  | 1 | 1 | 0 | # | ao  |
| 1293 | 16 | 1 | 1.575000  | -15.477924157 | -18.727185446 | 7.691610963  | 1 | 1 | 0 | # | ao  |
| 1294 | 16 | 1 | 1.575000  | -12.890920700 | -18.737173074 | 3.468502305  | 1 | 1 | 0 | # | ao  |
| 1295 | 16 | 2 | 0.425000  | -12.372044145 | -17.343036629 | 1.461851013  | 1 | 1 | 0 | # | ho  |
| 1296 | 16 | 2 | 0.425000  | -14.942477472 | -17.244695847 | 5.731312462  | 1 | 1 | 0 | # | ho  |
| 1297 | 16 | 2 | 0.425000  | -10.870735677 | 17.337409910  | 4.082601022  | 1 | 0 | 0 | # | ho  |
| 1298 | 16 | 2 | 0.425000  | -13.442332585 | 17.431442661  | 8.349425190  | 1 | 0 | 0 | # | ho  |
| 1299 | 16 | 3 | -1.050000 | -13.514079233 | 17.750750650  | 4.908780749  | 1 | 0 | 0 | # | ob  |
| 1300 | 16 | 3 | -1.050000 | -13.899116052 | 17.758665989  | 2.223829865  | 1 | 0 | 0 | # | ob  |
| 1301 | 16 | 3 | -1.050000 | -11.325579590 | 17.765964470  | 6.457577115  | 1 | 0 | 0 | # | ob  |
| 1302 | 16 | 3 | -1.050000 | -13.268649550 | 15.513870541  | 3.535812584  | 1 | 0 | 0 | # | ob  |
| 1303 | 16 | 3 | -1.050000 | -10.684056058 | 15.514671910  | 7.754751701  | 1 | 0 | 0 | # | ob  |
| 1304 | 16 | 3 | -1.050000 | -14.881794217 | -17.660039116 | 0.680433991  | 1 | 1 | 0 | # | ob  |
| 1305 | 16 | 3 | -1.050000 | -12.300224505 | -17.661884485 | 4.902851743  | 1 | 1 | 0 | # | ob  |
| 1306 | 16 | 3 | -1.050000 | -13.132874866 | -15.428256828 | 3.727147445  | 1 | 1 | 0 | # | ob  |
| 1307 | 16 | 3 | -1.050000 | -10.559457334 | -15.424740091 | 7.955469793  | 1 | 1 | 0 | # | ob  |
| 1308 | 16 | 3 | -1.050000 | -15.129800490 | -15.425454729 | 2.056943562  | 1 | 1 | 0 | # | ob  |
| 1309 | 16 | 3 | -1.050000 | -12.545240482 | -15.425177613 | 6.275700930  | 1 | 1 | 0 | # | ob  |
| 1310 | 16 | 4 | -0.950000 | -14.514582553 | -17.738142618 | 6.456311812  | 1 | 1 | 0 | # | oh  |
| 1311 | 16 | 4 | -0.950000 | -11.929329560 | -17.750835269 | 2.229260000  | 1 | 1 | 0 | # | oh  |
| 1312 | 16 | 3 | -1.050000 | -13.119409054 | -15.701706791 | 0.417596118  | 1 | 1 | 0 | # | ob  |
| 1313 | 16 | 3 | -1.050000 | -10.525124007 | -15.717859730 | 4.648938892  | 1 | 1 | 0 | # | ob  |
| 1314 | 16 | 4 | -0.950000 | -13.885034277 | 17.839710067  | 7.582229270  | 1 | 0 | 0 | # | oh  |
| 1315 | 16 | 3 | -1.050000 | -15.288448515 | 15.806346611  | 5.162916698  | 1 | 0 | 0 | # | ob  |
| 1316 | 16 | 4 | -0.950000 | -11.299423532 | 17.827436781  | 3.355759607  | 1 | 0 | 0 | # | oh  |
| 1317 | 16 | 3 | -1.050000 | -12.694730266 | 15.790522954  | 0.944364434  | 1 | 0 | 0 | # | ob  |
| 1318 | 16 | 3 | -1.050000 | -14.488462728 | -17.677041387 | 3.353842278  | 1 | 1 | 0 | # | ob  |
| 1319 | 16 | 3 | -1.050000 | -11.914914866 | -17.669834762 | 7.587875661  | 1 | 1 | 0 | # | ob  |
| 1320 | 16 | 3 | -1.050000 | -10.932562377 | 17.749076708  | 0.681739972  | 1 | 0 | 0 | # | ob  |
| 1321 | 16 | 3 | -1.050000 | -15.254665415 | 15.513833707  | 1.856176368  | 1 | 0 | 0 | # | ob  |
| 1322 | 16 | 3 | -1.050000 | -12.680712729 | 15.517136431  | 6.084357725  | 1 | 0 | 0 | # | ob  |
| 1323 | 16 | 5 | 2.100000  | -14.611396523 | -16.047600962 | 3.452486522  | 1 | 1 | 0 | # | st  |
| 1324 | 16 | 5 | 2.100000  | -12.039370783 | -16.038619659 | 7.680379551  | 1 | 1 | 0 | # | st  |
| 1325 | 16 | 5 | 2.100000  | -11.116023949 | 16.130136608  | 0.744074984  | 1 | 0 | 0 | # | st  |
| 1326 | 16 | 5 | 2.100000  | -13.774666039 | 16.127439967  | 2.131278354  | 1 | 0 | 0 | # | st  |
| 1327 | 16 | 5 | 2.100000  | -11.202249750 | 16.136517420  | 6.359024273  | 1 | 0 | 0 | # | st  |
| 1328 | 16 | 5 | 2.100000  | -14.698121161 | -16.041150089 | 0.617961151  | 1 | 1 | 0 | # | st  |
| 1329 | 16 | 5 | 2.100000  | -12.109727332 | -16.044802575 | 4.839744045  | 1 | 1 | 0 | # | st  |
| 1330 | 16 | 5 | 2.100000  | -13.703981255 | 16.133504185  | 4.971778212  | 1 | 0 | 0 | # | st  |
| 1331 | 16 | 1 | 1.575000  | -12.923448102 | -18.710342674 | 14.792747493 | 1 | 1 | 0 | # | ao  |
| 1332 | 16 | 1 | 1.575000  | -10.336308114 | -18.720367335 | 10.569647493 | 1 | 1 | 0 | # | ao  |
| 1333 | 16 | 1 | 1.575000  | -15.477924157 | -18.727185446 | 16.141210963 | 1 | 1 | 0 | # | ao  |
| 1334 | 16 | 1 | 1.575000  | -12.890920700 | -18.737173074 | 11.918102305 | 1 | 1 | 0 | # | ao  |
| 1335 | 16 | 2 | 0.425000  | -12.372044145 | -17.343036629 | 9.911451013  | 1 | 1 | 0 | # | ho  |
| 1336 | 16 | 2 | 0.425000  | -14.942477472 | -17.244695847 | 14.180912462 | 1 | 1 | 0 | # | ho  |
| 1337 | 16 | 2 | 0.425000  | -10.870735677 | 17.337409910  | 12.532201022 | 1 | 0 | 0 | # | ho  |
| 1338 | 16 | 6 | 0.425000  | -13.442332585 | 17.431442661  | 16.799025190 | 1 | 0 | 0 | # | do  |
| 1339 | 16 | 3 | -1.050000 | -13.514079233 | 17.750750650  | 13.358380749 | 1 | 0 | 0 | # | ob  |
| 1340 | 16 | 3 | -1.050000 | -13.899116052 | 17.758665989  | 10.673429865 | 1 | 0 | 0 | # | ob  |
| 1341 | 16 | 3 | -1.050000 | -11.325579590 | 17.765964470  | 14.907177115 | 1 | 0 | 0 | # | ob  |
| 1342 | 16 | 3 | -1.050000 | -13.268649550 | 15.513870541  | 11.985412584 | 1 | 0 | 0 | # | ob  |
| 1343 | 16 | 3 | -1.050000 | -14.881794217 | -17.660039116 | 9.130033991  | 1 | 1 | 0 | # | ob  |
| 1344 | 16 | 3 | -1.050000 | -12.300224505 | -17.661884485 | 13.352451743 | 1 | 1 | 0 | # | ob  |
| 1345 | 16 | 3 | -1.050000 | -13.132874866 | -15.428256828 | 12.176747445 | 1 | 1 | 0 | # | ob  |
| 1346 | 16 | 3 | -1.050000 | -10.559457334 | -15.424740091 | 16.405069793 | 1 | 1 | 0 | # | ob  |
| 1347 | 16 | 3 | -1.050000 | -15.129800490 | -15.425454729 | 10.506543562 | 1 | 1 | 0 | # | ob  |
| 1348 | 16 | 3 | -1.050000 | -12.545240482 | -15.425177613 | 14.725300930 | 1 | 1 | 0 | # | ob  |
| 1349 | 16 | 4 | -0.950000 | -14.514582553 | -17.738142618 | 14.905911812 | 1 | 1 | 0 | # | oh  |
| 1350 | 16 | 4 | -0.950000 | -11.929329560 | -17.750835269 | 10.678860000 | 1 | 1 | 0 | # | oh  |
| 1351 | 16 | 3 | -1.050000 | -13.119409054 | -15.701706791 | 8.867196118  | 1 | 1 | 0 | # | ob  |
| 1352 | 16 | 3 | -1.050000 | -10.525124007 | -15.717859730 | 13.098538892 | 1 | 1 | 0 | # | ob  |
| 1353 | 16 | 7 | -0.950000 | -13.885034277 | 17.839710067  | 16.031829270 | 1 | 0 | 0 | # | oho |
| 1354 | 16 | 3 | -1.050000 | -15.288448515 | 15.806346611  | 13.612516698 | 1 | 0 | 0 | # | ob  |
| 1355 | 16 | 4 | -0.950000 | -11.299423532 | 17.827436781  | 11.805359607 | 1 | 0 | 0 | # | oh  |

|      |    |   |           |               |               |              |   |   |   |   |     |
|------|----|---|-----------|---------------|---------------|--------------|---|---|---|---|-----|
| 1356 | 16 | 3 | -1.050000 | -12.694730266 | 15.790522954  | 9.393964434  | 1 | 0 | 0 | # | ob  |
| 1357 | 16 | 3 | -1.050000 | -14.488462728 | -17.677041387 | 11.803442278 | 1 | 1 | 0 | # | ob  |
| 1358 | 16 | 3 | -1.050000 | -11.914914866 | -17.669834762 | 16.037475661 | 1 | 1 | 0 | # | ob  |
| 1359 | 16 | 3 | -1.050000 | -10.932562377 | 17.749076708  | 9.131339972  | 1 | 0 | 0 | # | ob  |
| 1360 | 16 | 3 | -1.050000 | -15.254665415 | 15.513833707  | 10.305776368 | 1 | 0 | 0 | # | ob  |
| 1361 | 16 | 3 | -1.050000 | -12.680712729 | 15.517136431  | 14.533957725 | 1 | 0 | 0 | # | ob  |
| 1362 | 16 | 5 | 2.100000  | -14.611396523 | -16.047600962 | 11.902086522 | 1 | 1 | 0 | # | st  |
| 1363 | 16 | 5 | 2.100000  | -12.039370783 | -16.038619659 | 16.129979551 | 1 | 1 | 0 | # | st  |
| 1364 | 16 | 5 | 2.100000  | -11.116023949 | 16.130136608  | 9.193674984  | 1 | 0 | 0 | # | st  |
| 1365 | 16 | 5 | 2.100000  | -13.774666039 | 16.127439967  | 10.580878354 | 1 | 0 | 0 | # | st  |
| 1366 | 16 | 5 | 2.100000  | -11.202249750 | 16.136517420  | 14.808624273 | 1 | 0 | 0 | # | st  |
| 1367 | 16 | 5 | 2.100000  | -14.698121161 | -16.041150089 | 9.067561151  | 1 | 1 | 0 | # | st  |
| 1368 | 16 | 5 | 2.100000  | -12.109727332 | -16.044802575 | 13.289344045 | 1 | 1 | 0 | # | st  |
| 1369 | 16 | 5 | 2.100000  | -13.703981255 | 16.133504185  | 13.421378212 | 1 | 0 | 0 | # | st  |
| 1370 | 16 | 3 | -1.050000 | -14.881794217 | -17.660039116 | 17.579633991 | 1 | 1 | 0 | # | ob  |
| 1371 | 16 | 8 | -0.950000 | -15.129800490 | -15.425454729 | 18.956143562 | 1 | 1 | 0 | # | oht |
| 1372 | 16 | 3 | -1.050000 | -13.119409054 | -15.701706791 | 17.316796118 | 1 | 1 | 0 | # | ob  |
| 1373 | 16 | 5 | 2.100000  | -14.698121161 | -16.041150089 | 17.517161151 | 1 | 1 | 0 | # | st  |
| 1374 | 16 | 8 | -0.950000 | -10.642348817 | 16.134128849  | 16.634714390 | 1 | 0 | 0 | # | oht |
| 1375 | 16 | 6 | 0.425000  | -15.052961041 | -15.518101635 | 20.059598264 | 1 | 1 | 0 | # | do  |
| 1376 | 16 | 6 | 0.425000  | -11.030566564 | 16.234513767  | 17.669755394 | 1 | 0 | 0 | # | do  |
| 1377 | 17 | 1 | 1.575000  | -7.760648102  | -18.710342674 | 6.343147493  | 1 | 1 | 0 | # | ao  |
| 1378 | 17 | 1 | 1.575000  | -5.173508114  | -18.720367335 | 2.120047493  | 1 | 1 | 0 | # | ao  |
| 1379 | 17 | 1 | 1.575000  | -10.315124157 | -18.727185446 | 7.691610963  | 1 | 1 | 0 | # | ao  |
| 1380 | 17 | 1 | 1.575000  | -7.728120700  | -18.737173074 | 3.468502305  | 1 | 1 | 0 | # | ao  |
| 1381 | 17 | 2 | 0.425000  | -7.209244145  | -17.343036629 | 1.461851013  | 1 | 1 | 0 | # | ho  |
| 1382 | 17 | 2 | 0.425000  | -9.779677472  | -17.244695847 | 5.731312462  | 1 | 1 | 0 | # | ho  |
| 1383 | 17 | 2 | 0.425000  | -5.707935677  | 17.337409910  | 4.082601022  | 1 | 0 | 0 | # | ho  |
| 1384 | 17 | 2 | 0.425000  | -8.279532585  | 17.431442661  | 8.349425190  | 1 | 0 | 0 | # | ho  |
| 1385 | 17 | 3 | -1.050000 | -8.351279233  | 17.750750650  | 4.908780749  | 1 | 0 | 0 | # | ob  |
| 1386 | 17 | 3 | -1.050000 | -8.736316052  | 17.758665989  | 2.223829865  | 1 | 0 | 0 | # | ob  |
| 1387 | 17 | 3 | -1.050000 | -6.162779590  | 17.765964470  | 6.457577115  | 1 | 0 | 0 | # | ob  |
| 1388 | 17 | 3 | -1.050000 | -8.105849550  | 15.513870541  | 3.535812584  | 1 | 0 | 0 | # | ob  |
| 1389 | 17 | 3 | -1.050000 | -5.521265058  | 15.514671910  | 7.754751701  | 1 | 0 | 0 | # | ob  |
| 1390 | 17 | 3 | -1.050000 | -9.718994217  | -17.660039116 | 0.680433991  | 1 | 1 | 0 | # | ob  |
| 1391 | 17 | 3 | -1.050000 | -7.137424505  | -17.661884485 | 4.902851743  | 1 | 1 | 0 | # | ob  |
| 1392 | 17 | 3 | -1.050000 | -7.970074866  | -15.428256828 | 3.727147445  | 1 | 1 | 0 | # | ob  |
| 1393 | 17 | 3 | -1.050000 | -5.396657334  | -15.424740091 | 7.955469793  | 1 | 1 | 0 | # | ob  |
| 1394 | 17 | 3 | -1.050000 | -9.967000490  | -15.425454729 | 2.056943562  | 1 | 1 | 0 | # | ob  |
| 1395 | 17 | 3 | -1.050000 | -7.382440482  | -15.425177613 | 6.275700930  | 1 | 1 | 0 | # | ob  |
| 1396 | 17 | 4 | -0.950000 | -9.351782553  | -17.738142618 | 6.456311812  | 1 | 1 | 0 | # | oh  |
| 1397 | 17 | 4 | -0.950000 | -6.766529560  | -17.750835269 | 2.229260000  | 1 | 1 | 0 | # | oh  |
| 1398 | 17 | 3 | -1.050000 | -7.956609054  | -15.701706791 | 0.417596118  | 1 | 1 | 0 | # | ob  |
| 1399 | 17 | 3 | -1.050000 | -5.362324007  | -15.717859730 | 4.648938892  | 1 | 1 | 0 | # | ob  |
| 1400 | 17 | 4 | -0.950000 | -8.722234277  | 17.839710067  | 7.58229270   | 1 | 0 | 0 | # | oh  |
| 1401 | 17 | 3 | -1.050000 | -10.125648515 | 15.806346611  | 5.162916698  | 1 | 0 | 0 | # | ob  |
| 1402 | 17 | 4 | -0.950000 | -6.136623532  | 17.827436781  | 3.355759607  | 1 | 0 | 0 | # | oh  |
| 1403 | 17 | 3 | -1.050000 | -7.531930266  | 15.790522954  | 0.944364434  | 1 | 0 | 0 | # | ob  |
| 1404 | 17 | 3 | -1.050000 | -9.325662728  | -17.677041387 | 3.353842278  | 1 | 1 | 0 | # | ob  |
| 1405 | 17 | 3 | -1.050000 | -6.752114866  | -17.669834762 | 7.587875661  | 1 | 1 | 0 | # | ob  |
| 1406 | 17 | 3 | -1.050000 | -5.769762377  | 17.749076708  | 0.681739972  | 1 | 0 | 0 | # | ob  |
| 1407 | 17 | 3 | -1.050000 | -10.091865415 | 15.513833707  | 1.856176368  | 1 | 0 | 0 | # | ob  |
| 1408 | 17 | 3 | -1.050000 | -7.517912729  | 15.517136431  | 6.084357725  | 1 | 0 | 0 | # | ob  |
| 1409 | 17 | 5 | 2.100000  | -9.448596523  | -16.047600962 | 3.452486522  | 1 | 1 | 0 | # | st  |
| 1410 | 17 | 5 | 2.100000  | -6.876570783  | -16.038619659 | 7.680379551  | 1 | 1 | 0 | # | st  |
| 1411 | 17 | 5 | 2.100000  | -5.953223949  | 16.130136608  | 0.744074984  | 1 | 0 | 0 | # | st  |
| 1412 | 17 | 5 | 2.100000  | -8.611866039  | 16.127439967  | 2.131278354  | 1 | 0 | 0 | # | st  |
| 1413 | 17 | 5 | 2.100000  | -6.039449750  | 16.136517420  | 6.359024273  | 1 | 0 | 0 | # | st  |
| 1414 | 17 | 5 | 2.100000  | -9.535321161  | -16.041150089 | 0.617961151  | 1 | 1 | 0 | # | st  |
| 1415 | 17 | 5 | 2.100000  | -6.946927332  | -16.044802575 | 4.839744045  | 1 | 1 | 0 | # | st  |
| 1416 | 17 | 5 | 2.100000  | -8.541181255  | 16.133504185  | 4.971778212  | 1 | 0 | 0 | # | st  |
| 1417 | 17 | 1 | 1.575000  | -7.760648102  | -18.710342674 | 14.792747493 | 1 | 1 | 0 | # | ao  |
| 1418 | 17 | 1 | 1.575000  | -5.173508114  | -18.720367335 | 10.569647493 | 1 | 1 | 0 | # | ao  |
| 1419 | 17 | 1 | 1.575000  | -10.315124157 | -18.727185446 | 16.141210963 | 1 | 1 | 0 | # | ao  |
| 1420 | 17 | 1 | 1.575000  | -7.728120700  | -18.737173074 | 11.918102305 | 1 | 1 | 0 | # | ao  |
| 1421 | 17 | 2 | 0.425000  | -7.209244145  | -17.343036629 | 9.911451013  | 1 | 1 | 0 | # | ho  |
| 1422 | 17 | 2 | 0.425000  | -9.779677472  | -17.244695847 | 14.180912462 | 1 | 1 | 0 | # | ho  |
| 1423 | 17 | 2 | 0.425000  | -5.707935677  | 17.337409910  | 12.532201022 | 1 | 0 | 0 | # | ho  |
| 1424 | 17 | 6 | 0.425000  | -8.279532585  | 17.431442661  | 16.799025190 | 1 | 0 | 0 | # | do  |
| 1425 | 17 | 3 | -1.050000 | -8.351279233  | 17.750750650  | 13.358380749 | 1 | 0 | 0 | # | ob  |
| 1426 | 17 | 3 | -1.050000 | -8.736316052  | 17.758665989  | 10.673429865 | 1 | 0 | 0 | # | ob  |
| 1427 | 17 | 3 | -1.050000 | -6.162779590  | 17.765964470  | 14.907177115 | 1 | 0 | 0 | # | ob  |
| 1428 | 17 | 3 | -1.050000 | -8.105849550  | 15.513870541  | 11.985412584 | 1 | 0 | 0 | # | ob  |
| 1429 | 17 | 3 | -1.050000 | -9.718994217  | -17.660039116 | 9.130033991  | 1 | 1 | 0 | # | ob  |
| 1430 | 17 | 3 | -1.050000 | -7.137424505  | -17.661884485 | 13.352451743 | 1 | 1 | 0 | # | ob  |
| 1431 | 17 | 3 | -1.050000 | -7.970074866  | -15.428256828 | 12.176747445 | 1 | 1 | 0 | # | ob  |
| 1432 | 17 | 3 | -1.050000 | -5.396657334  | -15.424740091 | 16.405069793 | 1 | 1 | 0 | # | ob  |
| 1433 | 17 | 3 | -1.050000 | -9.967000490  | -15.425454729 | 10.506543562 | 1 | 1 | 0 | # | ob  |
| 1434 | 17 | 3 | -1.050000 | -7.382440482  | -15.425177613 | 14.725300930 | 1 | 1 | 0 | # | ob  |
| 1435 | 17 | 4 | -0.950000 | -9.351782553  | -17.738142618 | 14.905911812 | 1 | 1 | 0 | # | oh  |
| 1436 | 17 | 4 | -0.950000 | -6.766529560  | -17.750835269 | 10.678860000 | 1 | 1 | 0 | # | oh  |
| 1437 | 17 | 3 | -1.050000 | -7.956609054  | -15.701706791 | 8.867196118  | 1 | 1 | 0 | # | ob  |
| 1438 | 17 | 3 | -1.050000 | -5.362324007  | -15.717859730 | 13.098538892 | 1 | 1 | 0 | # | ob  |
| 1439 | 17 | 7 | -0.950000 | -8.722234277  | 17.839710067  | 16.031829270 | 1 | 0 | 0 | # | oho |
| 1440 | 17 | 3 | -1.050000 | -10.125648515 | 15.806346611  | 13.612516698 | 1 | 0 | 0 | # | ob  |
| 1441 | 17 | 4 | -0.950000 | -6.136623532  | 17.827436781  | 11.805359607 | 1 | 0 | 0 | # | oh  |
| 1442 | 17 | 3 | -1.050000 | -7.531930266  | 15.790522954  | 9.393964434  | 1 | 0 | 0 | # | ob  |
| 1443 | 17 | 3 | -1.050000 | -9.325662728  | -17.677041387 | 11.803442278 | 1 | 1 | 0 | # | ob  |
| 1444 | 17 | 3 | -1.050000 | -6.752114866  | -17.669834762 | 16.037475661 | 1 | 1 | 0 | # | ob  |
| 1445 | 17 | 3 | -1.050000 | -5.769762377  | 17.749076708  | 9.131339972  | 1 | 0 | 0 | # | ob  |
| 1446 | 17 | 3 | -1.050000 | -10.091865415 | 15.513833707  | 10.305776368 | 1 | 0 | 0 | # | ob  |
| 1447 | 17 | 3 | -1.050000 | -7.517912729  | 15.517136431  | 14.533957725 | 1 | 0 | 0 | # | ob  |
| 1448 | 17 | 5 | 2.100000  | -9.448596523  | -16.047600962 | 11.902086522 | 1 | 1 | 0 | # | st  |

|      |    |   |           |              |               |              |   |   |   |   |     |
|------|----|---|-----------|--------------|---------------|--------------|---|---|---|---|-----|
| 1449 | 17 | 5 | 2.100000  | -6.876570783 | -16.038619659 | 16.129979551 | 1 | 1 | 0 | # | st  |
| 1450 | 17 | 5 | 2.100000  | -5.953223949 | 16.130136608  | 9.193674984  | 1 | 0 | 0 | # | st  |
| 1451 | 17 | 5 | 2.100000  | -8.611866039 | 16.127439967  | 10.580878354 | 1 | 0 | 0 | # | st  |
| 1452 | 17 | 5 | 2.100000  | -6.039449750 | 16.136517420  | 14.808624273 | 1 | 0 | 0 | # | st  |
| 1453 | 17 | 5 | 2.100000  | -9.535321161 | -16.041150089 | 9.067561151  | 1 | 1 | 0 | # | st  |
| 1454 | 17 | 5 | 2.100000  | -6.946927332 | -16.044802575 | 13.289344045 | 1 | 1 | 0 | # | st  |
| 1455 | 17 | 5 | 2.100000  | -8.541181255 | 16.133504185  | 13.421378212 | 1 | 0 | 0 | # | st  |
| 1456 | 17 | 3 | -1.050000 | -9.718994217 | -17.660039116 | 17.579633991 | 1 | 1 | 0 | # | ob  |
| 1457 | 17 | 8 | -0.950000 | -9.967000490 | -15.425454729 | 18.956143562 | 1 | 1 | 0 | # | oht |
| 1458 | 17 | 3 | -1.050000 | -7.956609054 | -15.701706791 | 17.316796118 | 1 | 1 | 0 | # | ob  |
| 1459 | 17 | 5 | 2.100000  | -9.535321161 | -16.041150089 | 17.517161151 | 1 | 1 | 0 | # | st  |
| 1460 | 17 | 8 | -0.950000 | -5.479548817 | 16.134128849  | 16.634714390 | 1 | 0 | 0 | # | oht |
| 1461 | 17 | 6 | 0.425000  | -9.890161041 | -15.518101635 | 20.059598264 | 1 | 1 | 0 | # | do  |
| 1462 | 17 | 6 | 0.425000  | -5.867766564 | 16.234513767  | 17.669755394 | 1 | 0 | 0 | # | do  |
| 1463 | 18 | 1 | 1.575000  | -2.597848102 | -18.710342674 | 6.343147493  | 1 | 1 | 0 | # | ao  |
| 1464 | 18 | 1 | 1.575000  | -0.010708114 | -18.720367335 | 2.120047493  | 1 | 1 | 0 | # | ao  |
| 1465 | 18 | 1 | 1.575000  | -5.152324157 | -18.727185446 | 7.691610963  | 1 | 1 | 0 | # | ao  |
| 1466 | 18 | 1 | 1.575000  | -2.565320700 | -18.737173074 | 3.468502305  | 1 | 1 | 0 | # | ao  |
| 1467 | 18 | 2 | 0.425000  | -2.046444145 | -17.343036629 | 1.461851013  | 1 | 1 | 0 | # | ho  |
| 1468 | 18 | 2 | 0.425000  | -4.616877472 | -17.244695847 | 5.731312462  | 1 | 1 | 0 | # | ho  |
| 1469 | 18 | 2 | 0.425000  | -0.545135677 | 17.337409910  | 4.082601022  | 1 | 0 | 0 | # | ho  |
| 1470 | 18 | 2 | 0.425000  | -3.116732585 | 17.431442661  | 8.349425190  | 1 | 0 | 0 | # | ho  |
| 1471 | 18 | 3 | -1.050000 | -3.188479233 | 17.750750650  | 4.908780749  | 1 | 0 | 0 | # | ob  |
| 1472 | 18 | 3 | -1.050000 | -3.573516052 | 17.758665989  | 2.223829865  | 1 | 0 | 0 | # | ob  |
| 1473 | 18 | 3 | -1.050000 | -0.999979590 | 17.765964470  | 6.457577115  | 1 | 0 | 0 | # | ob  |
| 1474 | 18 | 3 | -1.050000 | -2.943049550 | 15.513870541  | 3.535812584  | 1 | 0 | 0 | # | ob  |
| 1475 | 18 | 3 | -1.050000 | -0.358456058 | 15.514671910  | 7.754751701  | 1 | 0 | 0 | # | ob  |
| 1476 | 18 | 3 | -1.050000 | -4.556194217 | -17.660039116 | 0.680433991  | 1 | 1 | 0 | # | ob  |
| 1477 | 18 | 3 | -1.050000 | -1.974624505 | -17.661884485 | 4.902851743  | 1 | 1 | 0 | # | ob  |
| 1478 | 18 | 3 | -1.050000 | -2.807274866 | -15.428256828 | 3.727147445  | 1 | 1 | 0 | # | ob  |
| 1479 | 18 | 3 | -1.050000 | -0.233857334 | -15.424740091 | 7.955469793  | 1 | 1 | 0 | # | ob  |
| 1480 | 18 | 3 | -1.050000 | -4.804200490 | -15.425454729 | 2.056943562  | 1 | 1 | 0 | # | ob  |
| 1481 | 18 | 3 | -1.050000 | -2.219640482 | -15.425177613 | 6.275700930  | 1 | 1 | 0 | # | ob  |
| 1482 | 18 | 4 | -0.950000 | -4.188982553 | -17.738142618 | 6.456311812  | 1 | 1 | 0 | # | oh  |
| 1483 | 18 | 4 | -0.950000 | -1.603729560 | -17.750835269 | 2.229260000  | 1 | 1 | 0 | # | oh  |
| 1484 | 18 | 3 | -1.050000 | -2.793809054 | -15.701706791 | 0.417596118  | 1 | 1 | 0 | # | ob  |
| 1485 | 18 | 3 | -1.050000 | -0.199524007 | -15.717859730 | 4.648938892  | 1 | 1 | 0 | # | ob  |
| 1486 | 18 | 4 | -0.950000 | -3.559434277 | 17.839710067  | 7.582292270  | 1 | 0 | 0 | # | oh  |
| 1487 | 18 | 3 | -1.050000 | -4.962848515 | 15.806346611  | 5.162916698  | 1 | 0 | 0 | # | ob  |
| 1488 | 18 | 4 | -0.950000 | -0.973823532 | 17.827436781  | 3.355759607  | 1 | 0 | 0 | # | oh  |
| 1489 | 18 | 3 | -1.050000 | -2.369130266 | 15.790522954  | 0.944364434  | 1 | 0 | 0 | # | ob  |
| 1490 | 18 | 3 | -1.050000 | -4.162862728 | -17.677041387 | 3.353842278  | 1 | 1 | 0 | # | ob  |
| 1491 | 18 | 3 | -1.050000 | -1.589314866 | -17.669834762 | 7.587875661  | 1 | 1 | 0 | # | ob  |
| 1492 | 18 | 3 | -1.050000 | -0.606962377 | 17.749076708  | 0.681739972  | 1 | 0 | 0 | # | ob  |
| 1493 | 18 | 3 | -1.050000 | -4.929065415 | 15.513833707  | 1.856176368  | 1 | 0 | 0 | # | ob  |
| 1494 | 18 | 3 | -1.050000 | -2.355112729 | 15.517136431  | 6.084357725  | 1 | 0 | 0 | # | ob  |
| 1495 | 18 | 5 | 2.100000  | -4.285796523 | -16.047600962 | 3.452486522  | 1 | 1 | 0 | # | st  |
| 1496 | 18 | 5 | 2.100000  | -1.713770783 | -16.038619659 | 7.680379551  | 1 | 1 | 0 | # | st  |
| 1497 | 18 | 5 | 2.100000  | -0.790423949 | 16.130136608  | 0.744074984  | 1 | 0 | 0 | # | st  |
| 1498 | 18 | 5 | 2.100000  | -3.449066039 | 16.127439967  | 2.131278354  | 1 | 0 | 0 | # | st  |
| 1499 | 18 | 5 | 2.100000  | -0.876649750 | 16.136517420  | 6.359024273  | 1 | 0 | 0 | # | st  |
| 1500 | 18 | 5 | 2.100000  | -4.372521161 | -16.041150089 | 0.617961151  | 1 | 1 | 0 | # | st  |
| 1501 | 18 | 5 | 2.100000  | -1.784127332 | -16.044802575 | 4.839744045  | 1 | 1 | 0 | # | st  |
| 1502 | 18 | 5 | 2.100000  | -3.378381255 | 16.133504185  | 4.971778212  | 1 | 0 | 0 | # | st  |
| 1503 | 18 | 1 | 1.575000  | -2.597848102 | -18.710342674 | 14.792747493 | 1 | 1 | 0 | # | ao  |
| 1504 | 18 | 1 | 1.575000  | -0.010708114 | -18.720367335 | 10.569647493 | 1 | 1 | 0 | # | ao  |
| 1505 | 18 | 1 | 1.575000  | -5.152324157 | -18.727185446 | 16.141210963 | 1 | 1 | 0 | # | ao  |
| 1506 | 18 | 1 | 1.575000  | -2.565320700 | -18.737173074 | 11.918102305 | 1 | 1 | 0 | # | ao  |
| 1507 | 18 | 2 | 0.425000  | -2.046444145 | -17.343036629 | 9.911451013  | 1 | 1 | 0 | # | ho  |
| 1508 | 18 | 2 | 0.425000  | -4.616877472 | -17.244695847 | 14.180912462 | 1 | 1 | 0 | # | ho  |
| 1509 | 18 | 2 | 0.425000  | -0.545135677 | 17.337409910  | 12.532201022 | 1 | 0 | 0 | # | ho  |
| 1510 | 18 | 6 | 0.425000  | -3.116732585 | 17.431442661  | 16.799025190 | 1 | 0 | 0 | # | do  |
| 1511 | 18 | 3 | -1.050000 | -3.188479233 | 17.750750650  | 13.358380749 | 1 | 0 | 0 | # | ob  |
| 1512 | 18 | 3 | -1.050000 | -3.573516052 | 17.758665989  | 10.673429865 | 1 | 0 | 0 | # | ob  |
| 1513 | 18 | 3 | -1.050000 | -0.999979590 | 17.765964470  | 14.907177115 | 1 | 0 | 0 | # | ob  |
| 1514 | 18 | 3 | -1.050000 | -2.943049550 | 15.513870541  | 11.985412584 | 1 | 1 | 0 | # | ob  |
| 1515 | 18 | 3 | -1.050000 | -4.556194217 | -17.660039116 | 9.130033991  | 1 | 1 | 0 | # | ob  |
| 1516 | 18 | 3 | -1.050000 | -1.974624505 | -17.661884485 | 13.352451743 | 1 | 1 | 0 | # | ob  |
| 1517 | 18 | 3 | -1.050000 | -2.807274866 | -15.428256828 | 12.176747445 | 1 | 1 | 0 | # | ob  |
| 1518 | 18 | 3 | -1.050000 | -0.233857334 | -15.424740091 | 16.405069793 | 1 | 1 | 0 | # | ob  |
| 1519 | 18 | 3 | -1.050000 | -4.804200490 | -15.425454729 | 10.506543562 | 1 | 1 | 0 | # | ob  |
| 1520 | 18 | 3 | -1.050000 | -2.219640482 | -15.425177613 | 14.725300930 | 1 | 1 | 0 | # | ob  |
| 1521 | 18 | 4 | -0.950000 | -4.188982553 | -17.738142618 | 14.905911812 | 1 | 1 | 0 | # | oh  |
| 1522 | 18 | 4 | -0.950000 | -1.603729560 | -17.750835269 | 10.678860000 | 1 | 1 | 0 | # | oh  |
| 1523 | 18 | 3 | -1.050000 | -2.793809054 | -15.701706791 | 8.867196118  | 1 | 1 | 0 | # | ob  |
| 1524 | 18 | 3 | -1.050000 | -0.199524007 | -15.717859730 | 13.098538892 | 1 | 1 | 0 | # | ob  |
| 1525 | 18 | 7 | -0.950000 | -3.559434277 | 17.839710067  | 16.031829270 | 1 | 0 | 0 | # | oho |
| 1526 | 18 | 3 | -1.050000 | -4.962848515 | 15.806346611  | 13.612516698 | 1 | 0 | 0 | # | ob  |
| 1527 | 18 | 4 | -0.950000 | -0.973823532 | 17.827436781  | 11.805359607 | 1 | 0 | 0 | # | oh  |
| 1528 | 18 | 3 | -1.050000 | -2.369130266 | 15.790522954  | 9.393964434  | 1 | 0 | 0 | # | ob  |
| 1529 | 18 | 3 | -1.050000 | -4.162862728 | -17.677041387 | 11.803442278 | 1 | 1 | 0 | # | ob  |
| 1530 | 18 | 3 | -1.050000 | -1.589314866 | -17.669834762 | 16.037475661 | 1 | 1 | 0 | # | ob  |
| 1531 | 18 | 3 | -1.050000 | -0.606962377 | 17.749076708  | 9.131339972  | 1 | 0 | 0 | # | ob  |
| 1532 | 18 | 3 | -1.050000 | -4.929065415 | 15.513833707  | 10.305776368 | 1 | 0 | 0 | # | ob  |
| 1533 | 18 | 3 | -1.050000 | -2.355112729 | 15.517136431  | 14.533957725 | 1 | 0 | 0 | # | ob  |
| 1534 | 18 | 5 | 2.100000  | -4.285796523 | -16.047600962 | 11.902086522 | 1 | 1 | 0 | # | st  |
| 1535 | 18 | 5 | 2.100000  | -1.713770783 | -16.038619659 | 16.129979551 | 1 | 1 | 0 | # | st  |
| 1536 | 18 | 5 | 2.100000  | -0.790423949 | 16.130136608  | 9.193674984  | 1 | 0 | 0 | # | st  |
| 1537 | 18 | 5 | 2.100000  | -3.449066039 | 16.127439967  | 10.580878354 | 1 | 0 | 0 | # | st  |
| 1538 | 18 | 5 | 2.100000  | -0.876649750 | 16.136517420  | 14.808624273 | 1 | 0 | 0 | # | st  |
| 1539 | 18 | 5 | 2.100000  | -4.372521161 | -16.041150089 | 9.067561151  | 1 | 1 | 0 | # | st  |
| 1540 | 18 | 5 | 2.100000  | -1.784127332 | -16.044802575 | 13.289344045 | 1 | 1 | 0 | # | st  |
| 1541 | 18 | 5 | 2.100000  | -3.378381255 | 16.133504185  | 13.421378212 | 1 | 0 | 0 | # | st  |

|      |    |   |           |              |               |              |   |   |   |   |     |
|------|----|---|-----------|--------------|---------------|--------------|---|---|---|---|-----|
| 1542 | 18 | 3 | -1.050000 | -4.556194217 | -17.660039116 | 17.579633991 | 1 | 1 | 0 | # | ob  |
| 1543 | 18 | 8 | -0.950000 | -4.804200490 | -15.425454729 | 18.956143562 | 1 | 1 | 0 | # | oht |
| 1544 | 18 | 3 | -1.050000 | -2.793809054 | -15.701706791 | 17.316796118 | 1 | 1 | 0 | # | ob  |
| 1545 | 18 | 5 | 2.100000  | -4.372521161 | -16.041150089 | 17.517161151 | 1 | 1 | 0 | # | st  |
| 1546 | 18 | 8 | -0.950000 | -0.316748817 | 16.134128849  | 16.634714390 | 1 | 0 | 0 | # | oht |
| 1547 | 18 | 6 | 0.425000  | -4.727361041 | -15.518101635 | 20.059598264 | 1 | 1 | 0 | # | do  |
| 1548 | 18 | 6 | 0.425000  | -0.704966564 | 16.234513767  | 17.669755394 | 1 | 0 | 0 | # | do  |
| 1549 | 19 | 1 | 1.575000  | 2.564951898  | -9.326242674  | 6.343147493  | 0 | 1 | 0 | # | ao  |
| 1550 | 19 | 1 | 1.575000  | 5.152091886  | -9.336267335  | 2.120047493  | 0 | 1 | 0 | # | ao  |
| 1551 | 19 | 1 | 1.575000  | 0.010475843  | -9.343085446  | 7.691610963  | 0 | 1 | 0 | # | ao  |
| 1552 | 19 | 1 | 1.575000  | 2.597479300  | -9.353073074  | 3.468502305  | 0 | 1 | 0 | # | ao  |
| 1553 | 19 | 2 | 0.425000  | 3.116355855  | -7.958936629  | 1.461851013  | 0 | 1 | 0 | # | ho  |
| 1554 | 19 | 2 | 0.425000  | 0.545922528  | -7.860595847  | 5.731312462  | 0 | 1 | 0 | # | ho  |
| 1555 | 19 | 2 | 0.425000  | 4.617664323  | -10.814890090 | 4.082601022  | 0 | 1 | 0 | # | ho  |
| 1556 | 19 | 2 | 0.425000  | 2.046067415  | -10.720857339 | 8.349425190  | 0 | 1 | 0 | # | ho  |
| 1557 | 19 | 3 | -1.050000 | 1.974320767  | -10.401549350 | 4.908780749  | 0 | 1 | 0 | # | ob  |
| 1558 | 19 | 3 | -1.050000 | 1.589283948  | -10.393634011 | 2.223829865  | 0 | 1 | 0 | # | ob  |
| 1559 | 19 | 3 | -1.050000 | 4.162820410  | -10.386335530 | 6.457577115  | 0 | 1 | 0 | # | ob  |
| 1560 | 19 | 3 | -1.050000 | 2.219750450  | -12.638429459 | 3.535812584  | 0 | 1 | 0 | # | ob  |
| 1561 | 19 | 3 | -1.050000 | 4.804343942  | -12.637628090 | 7.754751701  | 0 | 1 | 0 | # | ob  |
| 1562 | 19 | 3 | -1.050000 | 0.606605783  | -8.275939116  | 0.680433991  | 0 | 1 | 0 | # | ob  |
| 1563 | 19 | 3 | -1.050000 | 3.188175495  | -8.277784485  | 4.902851743  | 0 | 1 | 0 | # | ob  |
| 1564 | 19 | 3 | -1.050000 | 2.355525134  | -6.044156828  | 3.727147445  | 0 | 1 | 0 | # | ob  |
| 1565 | 19 | 3 | -1.050000 | 4.928942666  | -6.040640091  | 7.955469793  | 0 | 1 | 0 | # | ob  |
| 1566 | 19 | 3 | -1.050000 | 0.358599510  | -6.041354729  | 2.056943562  | 0 | 1 | 0 | # | ob  |
| 1567 | 19 | 3 | -1.050000 | 2.943159518  | -6.041077613  | 6.275700930  | 0 | 1 | 0 | # | ob  |
| 1568 | 19 | 4 | -0.950000 | 0.973817447  | -8.354042618  | 6.456311812  | 0 | 1 | 0 | # | oh  |
| 1569 | 19 | 4 | -0.950000 | 3.559070440  | -8.366735269  | 2.229260000  | 0 | 1 | 0 | # | oh  |
| 1570 | 19 | 3 | -1.050000 | 2.368990946  | -6.317606791  | 0.417596118  | 0 | 1 | 0 | # | ob  |
| 1571 | 19 | 3 | -1.050000 | 4.963275993  | -6.333759730  | 4.648938892  | 0 | 1 | 0 | # | ob  |
| 1572 | 19 | 4 | -0.950000 | 1.603365723  | -10.312589933 | 7.582229270  | 0 | 1 | 0 | # | oh  |
| 1573 | 19 | 3 | -1.050000 | 0.199951485  | -12.345953389 | 5.162916698  | 0 | 1 | 0 | # | ob  |
| 1574 | 19 | 4 | -0.950000 | 4.188976468  | -10.324863219 | 3.355759607  | 0 | 1 | 0 | # | oh  |
| 1575 | 19 | 3 | -1.050000 | 2.793669734  | -12.361777046 | 0.944364434  | 0 | 1 | 0 | # | ob  |
| 1576 | 19 | 3 | -1.050000 | 0.999937272  | -8.292941387  | 3.353842278  | 0 | 1 | 0 | # | ob  |
| 1577 | 19 | 3 | -1.050000 | 3.573485134  | -8.285734762  | 7.587875661  | 0 | 1 | 0 | # | ob  |
| 1578 | 19 | 3 | -1.050000 | 4.555837623  | -10.403223292 | 0.681739972  | 0 | 1 | 0 | # | ob  |
| 1579 | 19 | 3 | -1.050000 | 0.233734585  | -12.638466293 | 1.856176368  | 0 | 1 | 0 | # | ob  |
| 1580 | 19 | 3 | -1.050000 | 2.807687271  | -12.635163569 | 6.084357725  | 0 | 1 | 0 | # | ob  |
| 1581 | 19 | 5 | 2.100000  | 0.877003477  | -6.663500962  | 3.452486522  | 0 | 1 | 0 | # | st  |
| 1582 | 19 | 5 | 2.100000  | 3.449029217  | -6.654519659  | 7.680379551  | 0 | 1 | 0 | # | st  |
| 1583 | 19 | 5 | 2.100000  | 4.372376051  | -12.022163392 | 0.744074984  | 0 | 1 | 0 | # | st  |
| 1584 | 19 | 5 | 2.100000  | 1.713733961  | -12.024860033 | 2.131278354  | 0 | 1 | 0 | # | st  |
| 1585 | 19 | 5 | 2.100000  | 4.286150250  | -12.015782580 | 6.359024273  | 0 | 1 | 0 | # | st  |
| 1586 | 19 | 5 | 2.100000  | 0.790278839  | -6.657050089  | 0.617961151  | 0 | 1 | 0 | # | st  |
| 1587 | 19 | 5 | 2.100000  | 3.378672668  | -6.660702575  | 4.839744045  | 0 | 1 | 0 | # | st  |
| 1588 | 19 | 5 | 2.100000  | 1.784418745  | -12.018795815 | 4.971778212  | 0 | 1 | 0 | # | st  |
| 1589 | 19 | 1 | 1.575000  | 2.564951898  | -9.326242674  | 14.792747493 | 0 | 1 | 0 | # | ao  |
| 1590 | 19 | 1 | 1.575000  | 5.152091886  | -9.336267335  | 10.569647493 | 0 | 1 | 0 | # | ao  |
| 1591 | 19 | 1 | 1.575000  | 0.010475843  | -9.343085446  | 16.141210963 | 0 | 1 | 0 | # | ao  |
| 1592 | 19 | 1 | 1.575000  | 2.597479300  | -9.353073074  | 11.918102305 | 0 | 1 | 0 | # | ao  |
| 1593 | 19 | 2 | 0.425000  | 3.116355855  | -7.958936629  | 9.911451013  | 0 | 1 | 0 | # | ho  |
| 1594 | 19 | 2 | 0.425000  | 0.545922528  | -7.860595847  | 14.180912462 | 0 | 1 | 0 | # | ho  |
| 1595 | 19 | 2 | 0.425000  | 4.617664323  | -10.814890090 | 12.532201022 | 0 | 1 | 0 | # | ho  |
| 1596 | 19 | 6 | 0.425000  | 2.046067415  | -10.720857339 | 16.799025190 | 0 | 1 | 0 | # | do  |
| 1597 | 19 | 3 | -1.050000 | 1.974320767  | -10.401549350 | 13.358380749 | 0 | 1 | 0 | # | ob  |
| 1598 | 19 | 3 | -1.050000 | 1.589283948  | -10.393634011 | 10.673429865 | 0 | 1 | 0 | # | ob  |
| 1599 | 19 | 3 | -1.050000 | 4.162820410  | -10.386335530 | 14.907177115 | 0 | 1 | 0 | # | ob  |
| 1600 | 19 | 3 | -1.050000 | 2.219750450  | -12.638429459 | 11.985412584 | 0 | 1 | 0 | # | ob  |
| 1601 | 19 | 3 | -1.050000 | 0.606605783  | -8.275939116  | 9.130033991  | 0 | 1 | 0 | # | ob  |
| 1602 | 19 | 3 | -1.050000 | 3.188175495  | -8.277784485  | 13.352451743 | 0 | 1 | 0 | # | ob  |
| 1603 | 19 | 3 | -1.050000 | 2.355525134  | -6.044156828  | 12.176747445 | 0 | 1 | 0 | # | ob  |
| 1604 | 19 | 3 | -1.050000 | 4.928942666  | -6.040640091  | 16.405069793 | 0 | 1 | 0 | # | ob  |
| 1605 | 19 | 3 | -1.050000 | 0.358599510  | -6.041354729  | 10.506543562 | 0 | 1 | 0 | # | ob  |
| 1606 | 19 | 3 | -1.050000 | 2.943159518  | -6.041077613  | 14.725300930 | 0 | 1 | 0 | # | ob  |
| 1607 | 19 | 4 | -0.950000 | 0.973817447  | -8.354042618  | 14.905911812 | 0 | 1 | 0 | # | oh  |
| 1608 | 19 | 4 | -0.950000 | 3.559070440  | -8.366735269  | 10.678860000 | 0 | 1 | 0 | # | oh  |
| 1609 | 19 | 3 | -1.050000 | 2.368990946  | -6.317606791  | 8.867196118  | 0 | 1 | 0 | # | ob  |
| 1610 | 19 | 3 | -1.050000 | 4.963275993  | -6.333759730  | 13.098538892 | 0 | 1 | 0 | # | ob  |
| 1611 | 19 | 7 | -0.950000 | 1.603365723  | -10.312589933 | 16.031829270 | 0 | 1 | 0 | # | oho |
| 1612 | 19 | 3 | -1.050000 | 0.199951485  | -12.345953389 | 13.612516698 | 0 | 1 | 0 | # | ob  |
| 1613 | 19 | 4 | -0.950000 | 4.188976468  | -10.324863219 | 11.805359607 | 0 | 1 | 0 | # | oh  |
| 1614 | 19 | 3 | -1.050000 | 2.793669734  | -12.361777046 | 9.393964434  | 0 | 1 | 0 | # | ob  |
| 1615 | 19 | 3 | -1.050000 | 0.999937272  | -8.292941387  | 11.803442278 | 0 | 1 | 0 | # | ob  |
| 1616 | 19 | 3 | -1.050000 | 3.573485134  | -8.285734762  | 16.037475661 | 0 | 1 | 0 | # | ob  |
| 1617 | 19 | 3 | -1.050000 | 4.555837623  | -10.403223292 | 9.131339972  | 0 | 1 | 0 | # | ob  |
| 1618 | 19 | 3 | -1.050000 | 0.233734585  | -12.638466293 | 10.305776368 | 0 | 1 | 0 | # | ob  |
| 1619 | 19 | 3 | -1.050000 | 2.807687271  | -12.635163569 | 14.533957725 | 0 | 1 | 0 | # | ob  |
| 1620 | 19 | 5 | 2.100000  | 0.877003477  | -6.663500962  | 11.902086522 | 0 | 1 | 0 | # | st  |
| 1621 | 19 | 5 | 2.100000  | 3.449029217  | -6.654519659  | 16.129979551 | 0 | 1 | 0 | # | st  |
| 1622 | 19 | 5 | 2.100000  | 4.372376051  | -12.022163392 | 9.193674984  | 0 | 1 | 0 | # | st  |
| 1623 | 19 | 5 | 2.100000  | 1.713733961  | -12.024860033 | 10.580878354 | 0 | 1 | 0 | # | st  |
| 1624 | 19 | 5 | 2.100000  | 4.286150250  | -12.015782580 | 14.808624273 | 0 | 1 | 0 | # | st  |
| 1625 | 19 | 5 | 2.100000  | 0.790278839  | -6.657050089  | 9.067561151  | 0 | 1 | 0 | # | st  |
| 1626 | 19 | 5 | 2.100000  | 3.378672668  | -6.660702575  | 13.289344045 | 0 | 1 | 0 | # | st  |
| 1627 | 19 | 5 | 2.100000  | 1.784418745  | -12.018795815 | 13.421378212 | 0 | 1 | 0 | # | st  |
| 1628 | 19 | 3 | -1.050000 | 0.606605783  | -8.275939116  | 17.579633991 | 0 | 1 | 0 | # | ob  |
| 1629 | 19 | 8 | -0.950000 | 0.358599510  | -6.041354729  | 18.956143562 | 0 | 1 | 0 | # | oht |
| 1630 | 19 | 3 | -1.050000 | 2.368990946  | -6.317606791  | 17.316796118 | 0 | 1 | 0 | # | ob  |
| 1631 | 19 | 5 | 2.100000  | 0.790278839  | -6.657050089  | 17.517161151 | 0 | 1 | 0 | # | st  |
| 1632 | 19 | 8 | -0.950000 | 4.846051183  | -12.018171151 | 16.634714390 | 0 | 1 | 0 | # | oht |
| 1633 | 19 | 6 | 0.425000  | 0.435438959  | -6.134001635  | 20.059598264 | 0 | 1 | 0 | # | do  |
| 1634 | 19 | 6 | 0.425000  | 4.457833436  | -11.917786233 | 17.669755394 | 0 | 1 | 0 | # | do  |



|      |    |   |           |              |               |              |   |   |   |   |     |
|------|----|---|-----------|--------------|---------------|--------------|---|---|---|---|-----|
| 1635 | 20 | 1 | 1.575000  | 7.727751898  | -9.326242674  | 6.343147493  | 0 | 1 | 0 | # | ao  |
| 1636 | 20 | 1 | 1.575000  | 10.314891886 | -9.336267335  | 2.120047493  | 0 | 1 | 0 | # | ao  |
| 1637 | 20 | 1 | 1.575000  | 5.173275843  | -9.343085446  | 7.691610963  | 0 | 1 | 0 | # | ao  |
| 1638 | 20 | 1 | 1.575000  | 7.760279300  | -9.353073074  | 3.468502305  | 0 | 1 | 0 | # | ao  |
| 1639 | 20 | 2 | 0.425000  | 8.279155855  | -7.958936629  | 1.461851013  | 0 | 1 | 0 | # | ho  |
| 1640 | 20 | 2 | 0.425000  | 5.708722528  | -7.860595847  | 5.731312462  | 0 | 1 | 0 | # | ho  |
| 1641 | 20 | 2 | 0.425000  | 9.780464323  | -10.814890090 | 4.082601022  | 0 | 1 | 0 | # | ho  |
| 1642 | 20 | 2 | 0.425000  | 7.208867415  | -10.720857339 | 8.349425190  | 0 | 1 | 0 | # | ho  |
| 1643 | 20 | 3 | -1.050000 | 7.137120767  | -10.401549350 | 4.908780749  | 0 | 1 | 0 | # | ob  |
| 1644 | 20 | 3 | -1.050000 | 6.752083948  | -10.393634011 | 2.223829865  | 0 | 1 | 0 | # | ob  |
| 1645 | 20 | 3 | -1.050000 | 9.325620410  | -10.386335530 | 6.457577115  | 0 | 1 | 0 | # | ob  |
| 1646 | 20 | 3 | -1.050000 | 7.382550450  | -12.638429459 | 3.535812584  | 0 | 1 | 0 | # | ob  |
| 1647 | 20 | 3 | -1.050000 | 9.967143942  | -12.637628090 | 7.754751701  | 0 | 1 | 0 | # | ob  |
| 1648 | 20 | 3 | -1.050000 | 5.769405783  | -8.275939116  | 0.680433991  | 0 | 1 | 0 | # | ob  |
| 1649 | 20 | 3 | -1.050000 | 8.350975495  | -8.277784485  | 4.902851743  | 0 | 1 | 0 | # | ob  |
| 1650 | 20 | 3 | -1.050000 | 7.518325134  | -6.044156828  | 3.727147445  | 0 | 1 | 0 | # | ob  |
| 1651 | 20 | 3 | -1.050000 | 10.091742666 | -6.040640091  | 7.955469793  | 0 | 1 | 0 | # | ob  |
| 1652 | 20 | 3 | -1.050000 | 5.521399510  | -6.041354729  | 2.056943562  | 0 | 1 | 0 | # | ob  |
| 1653 | 20 | 3 | -1.050000 | 8.105959518  | -6.041077613  | 6.275700930  | 0 | 1 | 0 | # | ob  |
| 1654 | 20 | 4 | -0.950000 | 6.136617447  | -8.354042618  | 6.456311812  | 0 | 1 | 0 | # | oh  |
| 1655 | 20 | 4 | -0.950000 | 8.721870440  | -8.366735269  | 2.229260000  | 0 | 1 | 0 | # | oh  |
| 1656 | 20 | 3 | -1.050000 | 7.531790946  | -6.317606791  | 0.417596118  | 0 | 1 | 0 | # | ob  |
| 1657 | 20 | 3 | -1.050000 | 10.126075993 | -6.333759730  | 4.648938892  | 0 | 1 | 0 | # | ob  |
| 1658 | 20 | 4 | -0.950000 | 6.766165723  | -10.312589933 | 7.582229270  | 0 | 1 | 0 | # | oh  |
| 1659 | 20 | 3 | -1.050000 | 5.362751485  | -12.345953389 | 5.162916698  | 0 | 1 | 0 | # | ob  |
| 1660 | 20 | 4 | -0.950000 | 9.351776468  | -10.324863219 | 3.355759607  | 0 | 1 | 0 | # | oh  |
| 1661 | 20 | 3 | -1.050000 | 7.956469734  | -12.361777046 | 0.944364434  | 0 | 1 | 0 | # | ob  |
| 1662 | 20 | 3 | -1.050000 | 6.162737272  | -8.292941387  | 3.353842278  | 0 | 1 | 0 | # | ob  |
| 1663 | 20 | 3 | -1.050000 | 8.736285134  | -8.285734762  | 7.587875661  | 0 | 1 | 0 | # | ob  |
| 1664 | 20 | 3 | -1.050000 | 9.718637623  | -10.403223292 | 0.681739972  | 0 | 1 | 0 | # | ob  |
| 1665 | 20 | 3 | -1.050000 | 5.396534585  | -12.638466293 | 1.856176368  | 0 | 1 | 0 | # | ob  |
| 1666 | 20 | 3 | -1.050000 | 7.970487271  | -12.635163569 | 6.084357725  | 0 | 1 | 0 | # | ob  |
| 1667 | 20 | 5 | 2.100000  | 6.039803477  | -6.663500962  | 3.452486522  | 0 | 1 | 0 | # | st  |
| 1668 | 20 | 5 | 2.100000  | 8.611829217  | -6.654519659  | 7.680379551  | 0 | 1 | 0 | # | st  |
| 1669 | 20 | 5 | 2.100000  | 9.535176051  | -12.022163392 | 0.744074984  | 0 | 1 | 0 | # | st  |
| 1670 | 20 | 5 | 2.100000  | 6.876533961  | -12.024860033 | 2.131278354  | 0 | 1 | 0 | # | st  |
| 1671 | 20 | 5 | 2.100000  | 9.448950250  | -12.015782580 | 6.359024273  | 0 | 1 | 0 | # | st  |
| 1672 | 20 | 5 | 2.100000  | 5.953078839  | -6.657050089  | 0.617961151  | 0 | 1 | 0 | # | st  |
| 1673 | 20 | 5 | 2.100000  | 8.541472668  | -6.660702575  | 4.839744045  | 0 | 1 | 0 | # | st  |
| 1674 | 20 | 5 | 2.100000  | 6.947218745  | -12.018795815 | 4.971778212  | 0 | 1 | 0 | # | st  |
| 1675 | 20 | 1 | 1.575000  | 7.727751898  | -9.326242674  | 14.792747493 | 0 | 1 | 0 | # | ao  |
| 1676 | 20 | 1 | 1.575000  | 10.314891886 | -9.336267335  | 10.569647493 | 0 | 1 | 0 | # | ao  |
| 1677 | 20 | 1 | 1.575000  | 5.173275843  | -9.343085446  | 16.141210963 | 0 | 1 | 0 | # | ao  |
| 1678 | 20 | 1 | 1.575000  | 7.760279300  | -9.353073074  | 11.918102305 | 0 | 1 | 0 | # | ao  |
| 1679 | 20 | 2 | 0.425000  | 8.279155855  | -7.958936629  | 9.911451013  | 0 | 1 | 0 | # | ho  |
| 1680 | 20 | 2 | 0.425000  | 5.708722528  | -7.860595847  | 14.180912462 | 0 | 1 | 0 | # | ho  |
| 1681 | 20 | 2 | 0.425000  | 9.780464323  | -10.814890090 | 12.532201022 | 0 | 1 | 0 | # | ho  |
| 1682 | 20 | 6 | 0.425000  | 7.208867415  | -10.720857339 | 16.799025190 | 0 | 1 | 0 | # | do  |
| 1683 | 20 | 3 | -1.050000 | 7.137120767  | -10.401549350 | 13.358380749 | 0 | 1 | 0 | # | ob  |
| 1684 | 20 | 3 | -1.050000 | 6.752083948  | -10.393634011 | 10.673429865 | 0 | 1 | 0 | # | ob  |
| 1685 | 20 | 3 | -1.050000 | 9.325620410  | -10.386335530 | 14.907177115 | 0 | 1 | 0 | # | ob  |
| 1686 | 20 | 3 | -1.050000 | 7.382550450  | -12.638429459 | 11.985412584 | 0 | 1 | 0 | # | ob  |
| 1687 | 20 | 3 | -1.050000 | 5.769405783  | -8.275939116  | 9.130033991  | 0 | 1 | 0 | # | ob  |
| 1688 | 20 | 3 | -1.050000 | 8.350975495  | -8.277784485  | 13.352451743 | 0 | 1 | 0 | # | ob  |
| 1689 | 20 | 3 | -1.050000 | 7.518325134  | -6.044156828  | 12.176747445 | 0 | 1 | 0 | # | ob  |
| 1690 | 20 | 3 | -1.050000 | 10.091742666 | -6.040640091  | 16.405069793 | 0 | 1 | 0 | # | ob  |
| 1691 | 20 | 3 | -1.050000 | 5.521399510  | -6.041354729  | 10.506543562 | 0 | 1 | 0 | # | ob  |
| 1692 | 20 | 3 | -1.050000 | 8.105959518  | -6.041077613  | 14.725300930 | 0 | 1 | 0 | # | ob  |
| 1693 | 20 | 4 | -0.950000 | 6.136617447  | -8.354042618  | 14.905911812 | 0 | 1 | 0 | # | oh  |
| 1694 | 20 | 4 | -0.950000 | 8.721870440  | -8.366735269  | 10.678860000 | 0 | 1 | 0 | # | oh  |
| 1695 | 20 | 3 | -1.050000 | 7.531790946  | -6.317606791  | 8.867196118  | 0 | 1 | 0 | # | ob  |
| 1696 | 20 | 3 | -1.050000 | 10.126075993 | -6.333759730  | 13.098538892 | 0 | 1 | 0 | # | ob  |
| 1697 | 20 | 7 | -0.950000 | 6.766165723  | -10.312589933 | 16.031829270 | 0 | 1 | 0 | # | oho |
| 1698 | 20 | 3 | -1.050000 | 5.362751485  | -12.345953389 | 13.612516698 | 0 | 1 | 0 | # | ob  |
| 1699 | 20 | 4 | -0.950000 | 9.351776468  | -10.324863219 | 11.805359607 | 0 | 1 | 0 | # | oh  |
| 1700 | 20 | 3 | -1.050000 | 7.956469734  | -12.361777046 | 9.393964434  | 0 | 1 | 0 | # | ob  |
| 1701 | 20 | 3 | -1.050000 | 6.162737272  | -8.292941387  | 11.803442278 | 0 | 1 | 0 | # | ob  |
| 1702 | 20 | 3 | -1.050000 | 8.736285134  | -8.285734762  | 16.037475661 | 0 | 1 | 0 | # | ob  |
| 1703 | 20 | 3 | -1.050000 | 9.718637623  | -10.403223292 | 9.131339972  | 0 | 1 | 0 | # | ob  |
| 1704 | 20 | 3 | -1.050000 | 5.396534585  | -12.638466293 | 10.305776368 | 0 | 1 | 0 | # | ob  |
| 1705 | 20 | 3 | -1.050000 | 7.970487271  | -12.635163569 | 14.533957725 | 0 | 1 | 0 | # | ob  |
| 1706 | 20 | 5 | 2.100000  | 6.039803477  | -6.663500962  | 11.902086522 | 0 | 1 | 0 | # | st  |
| 1707 | 20 | 5 | 2.100000  | 8.611829217  | -6.654519659  | 16.129979551 | 0 | 1 | 0 | # | st  |
| 1708 | 20 | 5 | 2.100000  | 9.535176051  | -12.022163392 | 9.193674984  | 0 | 1 | 0 | # | st  |
| 1709 | 20 | 5 | 2.100000  | 6.876533961  | -12.024860033 | 10.580878354 | 0 | 1 | 0 | # | st  |
| 1710 | 20 | 5 | 2.100000  | 9.448950250  | -12.015782580 | 14.808624273 | 0 | 1 | 0 | # | st  |
| 1711 | 20 | 5 | 2.100000  | 5.953078839  | -6.657050089  | 9.067561151  | 0 | 1 | 0 | # | st  |
| 1712 | 20 | 5 | 2.100000  | 8.541472668  | -6.660702575  | 13.289344045 | 0 | 1 | 0 | # | st  |
| 1713 | 20 | 5 | 2.100000  | 6.947218745  | -12.018795815 | 13.421378212 | 0 | 1 | 0 | # | st  |
| 1714 | 20 | 3 | -1.050000 | 5.769405783  | -8.275939116  | 17.579633991 | 0 | 1 | 0 | # | ob  |
| 1715 | 20 | 8 | -0.950000 | 5.521399510  | -6.041354729  | 18.956143562 | 0 | 1 | 0 | # | oht |
| 1716 | 20 | 3 | -1.050000 | 7.531790946  | -6.317606791  | 17.316796118 | 0 | 1 | 0 | # | ob  |
| 1717 | 20 | 5 | 2.100000  | 5.953078839  | -6.657050089  | 17.517161151 | 0 | 1 | 0 | # | st  |
| 1718 | 20 | 8 | -0.950000 | 10.008851183 | -12.018171151 | 16.634714390 | 0 | 1 | 0 | # | oht |
| 1719 | 20 | 6 | 0.425000  | 5.598238959  | -6.134001635  | 20.059598264 | 0 | 1 | 0 | # | do  |
| 1720 | 20 | 6 | 0.425000  | 9.620633436  | -11.917786233 | 17.669755394 | 0 | 1 | 0 | # | do  |
| 1721 | 21 | 1 | 1.575000  | 12.890551898 | -9.326242674  | 6.343147493  | 0 | 1 | 0 | # | ao  |
| 1722 | 21 | 1 | 1.575000  | 15.477691886 | -9.336267335  | 2.120047493  | 0 | 1 | 0 | # | ao  |
| 1723 | 21 | 1 | 1.575000  | 10.336075843 | -9.343085446  | 7.691610963  | 0 | 1 | 0 | # | ao  |
| 1724 | 21 | 1 | 1.575000  | 12.923079300 | -9.353073074  | 3.468502305  | 0 | 1 | 0 | # | ao  |
| 1725 | 21 | 2 | 0.425000  | 13.441955855 | -7.958936629  | 1.461851013  | 0 | 1 | 0 | # | ho  |
| 1726 | 21 | 2 | 0.425000  | 10.871522528 | -7.860595847  | 5.731312462  | 0 | 1 | 0 | # | ho  |
| 1727 | 21 | 2 | 0.425000  | 14.943264323 | -10.814890090 | 4.082601022  | 0 | 1 | 0 | # | ho  |

|      |    |   |           |               |               |              |   |   |   |   |     |
|------|----|---|-----------|---------------|---------------|--------------|---|---|---|---|-----|
| 1728 | 21 | 2 | 0.425000  | 12.371667415  | -10.720857339 | 8.349425190  | 0 | 1 | 0 | # | ho  |
| 1729 | 21 | 3 | -1.050000 | 12.299920767  | -10.401549350 | 4.908780749  | 0 | 1 | 0 | # | ob  |
| 1730 | 21 | 3 | -1.050000 | 11.914883948  | -10.393634011 | 2.223829865  | 0 | 1 | 0 | # | ob  |
| 1731 | 21 | 3 | -1.050000 | 14.488420410  | -10.386335530 | 6.457577115  | 0 | 1 | 0 | # | ob  |
| 1732 | 21 | 3 | -1.050000 | 12.545350450  | -12.638429459 | 3.535812584  | 0 | 1 | 0 | # | ob  |
| 1733 | 21 | 3 | -1.050000 | 15.129943942  | -12.637628090 | 7.754751701  | 0 | 1 | 0 | # | ob  |
| 1734 | 21 | 3 | -1.050000 | 10.932205783  | -8.275939116  | 0.680433991  | 0 | 1 | 0 | # | ob  |
| 1735 | 21 | 3 | -1.050000 | 13.513775495  | -8.277784485  | 4.902851743  | 0 | 1 | 0 | # | ob  |
| 1736 | 21 | 3 | -1.050000 | 12.681125134  | -6.044156828  | 3.727147445  | 0 | 1 | 0 | # | ob  |
| 1737 | 21 | 3 | -1.050000 | 15.254542666  | -6.040640091  | 7.955469793  | 0 | 1 | 0 | # | ob  |
| 1738 | 21 | 3 | -1.050000 | 10.684199510  | -6.041354729  | 2.056943562  | 0 | 1 | 0 | # | ob  |
| 1739 | 21 | 3 | -1.050000 | 13.268759518  | -6.041077613  | 6.275700930  | 0 | 1 | 0 | # | ob  |
| 1740 | 21 | 4 | -0.950000 | 11.299417447  | -8.354042618  | 6.456311812  | 0 | 1 | 0 | # | oh  |
| 1741 | 21 | 4 | -0.950000 | 13.884670440  | -8.366735269  | 2.229260000  | 0 | 1 | 0 | # | oh  |
| 1742 | 21 | 3 | -1.050000 | 12.694590946  | -6.317606791  | 0.417596118  | 0 | 1 | 0 | # | ob  |
| 1743 | 21 | 3 | -1.050000 | 15.288875993  | -6.333759730  | 4.648938892  | 0 | 1 | 0 | # | ob  |
| 1744 | 21 | 4 | -0.950000 | 11.928965723  | -10.312589933 | 7.582229270  | 0 | 1 | 0 | # | oh  |
| 1745 | 21 | 3 | -1.050000 | 10.525551485  | -12.345953389 | 5.162916698  | 0 | 1 | 0 | # | ob  |
| 1746 | 21 | 4 | -0.950000 | 14.514576468  | -10.324863219 | 3.355759607  | 0 | 1 | 0 | # | oh  |
| 1747 | 21 | 3 | -1.050000 | 13.119269734  | -12.361777046 | 0.944364434  | 0 | 1 | 0 | # | ob  |
| 1748 | 21 | 3 | -1.050000 | 11.325537272  | -8.292941387  | 3.353842278  | 0 | 1 | 0 | # | ob  |
| 1749 | 21 | 3 | -1.050000 | 13.899085134  | -8.285734762  | 7.587875661  | 0 | 1 | 0 | # | ob  |
| 1750 | 21 | 3 | -1.050000 | 14.881437623  | -10.403223292 | 0.681739972  | 0 | 1 | 0 | # | ob  |
| 1751 | 21 | 3 | -1.050000 | 10.559334585  | -12.638466293 | 1.856176368  | 0 | 1 | 0 | # | ob  |
| 1752 | 21 | 3 | -1.050000 | 13.133287271  | -12.635163569 | 6.084357725  | 0 | 1 | 0 | # | ob  |
| 1753 | 21 | 5 | 2.100000  | 11.202603477  | -6.663500962  | 3.452486522  | 0 | 1 | 0 | # | st  |
| 1754 | 21 | 5 | 2.100000  | 13.774629217  | -6.654519659  | 7.680379551  | 0 | 1 | 0 | # | st  |
| 1755 | 21 | 5 | 2.100000  | 14.697976051  | -12.022163392 | 0.744074984  | 0 | 1 | 0 | # | st  |
| 1756 | 21 | 5 | 2.100000  | 12.039333961  | -12.024860033 | 2.131278354  | 0 | 1 | 0 | # | st  |
| 1757 | 21 | 5 | 2.100000  | 14.611750250  | -12.015782580 | 6.359024273  | 0 | 1 | 0 | # | st  |
| 1758 | 21 | 5 | 2.100000  | 11.115878839  | -6.657050089  | 0.617961151  | 0 | 1 | 0 | # | st  |
| 1759 | 21 | 5 | 2.100000  | 13.704272668  | -6.660702575  | 4.839744045  | 0 | 1 | 0 | # | st  |
| 1760 | 21 | 5 | 2.100000  | 12.110018745  | -12.018795815 | 4.971778212  | 0 | 1 | 0 | # | st  |
| 1761 | 21 | 1 | 1.575000  | 12.890551898  | -9.326242674  | 14.792747493 | 0 | 1 | 0 | # | ao  |
| 1762 | 21 | 1 | 1.575000  | 15.477691886  | -9.336267335  | 10.569647493 | 0 | 1 | 0 | # | ao  |
| 1763 | 21 | 1 | 1.575000  | 10.336075843  | -9.343085446  | 16.141210963 | 0 | 1 | 0 | # | ao  |
| 1764 | 21 | 1 | 1.575000  | 12.923079300  | -9.353073074  | 11.918102305 | 0 | 1 | 0 | # | ao  |
| 1765 | 21 | 2 | 0.425000  | 13.441955855  | -7.958936629  | 9.911451013  | 0 | 1 | 0 | # | ho  |
| 1766 | 21 | 2 | 0.425000  | 10.871522528  | -7.860595847  | 14.180912462 | 0 | 1 | 0 | # | ho  |
| 1767 | 21 | 2 | 0.425000  | 14.943264323  | -10.814890090 | 12.532201022 | 0 | 1 | 0 | # | ho  |
| 1768 | 21 | 6 | 0.425000  | 12.371667415  | -10.720857339 | 16.799025190 | 0 | 1 | 0 | # | do  |
| 1769 | 21 | 3 | -1.050000 | 12.299920767  | -10.401549350 | 13.358380749 | 0 | 1 | 0 | # | ob  |
| 1770 | 21 | 3 | -1.050000 | 11.914883948  | -10.393634011 | 10.673429865 | 0 | 1 | 0 | # | ob  |
| 1771 | 21 | 3 | -1.050000 | 14.488420410  | -10.386335530 | 14.907177115 | 0 | 1 | 0 | # | ob  |
| 1772 | 21 | 3 | -1.050000 | 12.545350450  | -12.638429459 | 11.985412584 | 0 | 1 | 0 | # | ob  |
| 1773 | 21 | 3 | -1.050000 | 10.932205783  | -8.275939116  | 9.130033991  | 0 | 1 | 0 | # | ob  |
| 1774 | 21 | 3 | -1.050000 | 13.513775495  | -8.277784485  | 13.352451743 | 0 | 1 | 0 | # | ob  |
| 1775 | 21 | 3 | -1.050000 | 12.681125134  | -6.044156828  | 12.176747445 | 0 | 1 | 0 | # | ob  |
| 1776 | 21 | 3 | -1.050000 | 15.254542666  | -6.040640091  | 16.405069793 | 0 | 1 | 0 | # | ob  |
| 1777 | 21 | 3 | -1.050000 | 10.684199510  | -6.041354729  | 10.506543562 | 0 | 1 | 0 | # | ob  |
| 1778 | 21 | 3 | -1.050000 | 13.268759518  | -6.041077613  | 14.725300930 | 0 | 1 | 0 | # | ob  |
| 1779 | 21 | 4 | -0.950000 | 11.299417447  | -8.354042618  | 14.905911812 | 0 | 1 | 0 | # | oh  |
| 1780 | 21 | 4 | -0.950000 | 13.884670440  | -8.366735269  | 10.678860000 | 0 | 1 | 0 | # | oh  |
| 1781 | 21 | 3 | -1.050000 | 12.694590946  | -6.317606791  | 8.867196118  | 0 | 1 | 0 | # | ob  |
| 1782 | 21 | 3 | -1.050000 | 15.288875993  | -6.333759730  | 13.098538892 | 0 | 1 | 0 | # | ob  |
| 1783 | 21 | 7 | -0.950000 | 11.928965723  | -10.312589933 | 16.031829270 | 0 | 1 | 0 | # | oh  |
| 1784 | 21 | 3 | -1.050000 | 10.525551485  | -12.345953389 | 13.612516698 | 0 | 1 | 0 | # | ob  |
| 1785 | 21 | 4 | -0.950000 | 14.514576468  | -10.324863219 | 11.805359607 | 0 | 1 | 0 | # | oh  |
| 1786 | 21 | 3 | -1.050000 | 13.119269734  | -12.361777046 | 9.393964434  | 0 | 1 | 0 | # | ob  |
| 1787 | 21 | 3 | -1.050000 | 11.325537272  | -8.292941387  | 11.803442278 | 0 | 1 | 0 | # | ob  |
| 1788 | 21 | 3 | -1.050000 | 13.899085134  | -8.285734762  | 16.037475661 | 0 | 1 | 0 | # | ob  |
| 1789 | 21 | 3 | -1.050000 | 14.881437623  | -10.403223292 | 9.131339972  | 0 | 1 | 0 | # | ob  |
| 1790 | 21 | 3 | -1.050000 | 10.559334585  | -12.638466293 | 10.305776368 | 0 | 1 | 0 | # | ob  |
| 1791 | 21 | 3 | -1.050000 | 13.133287271  | -12.635163569 | 14.533957725 | 0 | 1 | 0 | # | ob  |
| 1792 | 21 | 5 | 2.100000  | 11.202603477  | -6.663500962  | 11.902086522 | 0 | 1 | 0 | # | st  |
| 1793 | 21 | 5 | 2.100000  | 13.774629217  | -6.654519659  | 16.129979551 | 0 | 1 | 0 | # | st  |
| 1794 | 21 | 5 | 2.100000  | 14.697976051  | -12.022163392 | 9.193674984  | 0 | 1 | 0 | # | st  |
| 1795 | 21 | 5 | 2.100000  | 12.039333961  | -12.024860033 | 10.580878354 | 0 | 1 | 0 | # | st  |
| 1796 | 21 | 5 | 2.100000  | 14.611750250  | -12.015782580 | 14.808624273 | 0 | 1 | 0 | # | st  |
| 1797 | 21 | 5 | 2.100000  | 11.115878839  | -6.657050089  | 9.067561151  | 0 | 1 | 0 | # | st  |
| 1798 | 21 | 5 | 2.100000  | 13.704272668  | -6.660702575  | 13.289344045 | 0 | 1 | 0 | # | st  |
| 1799 | 21 | 5 | 2.100000  | 12.110018745  | -12.018795815 | 13.421378212 | 0 | 1 | 0 | # | st  |
| 1800 | 21 | 3 | -1.050000 | 10.932205783  | -8.275939116  | 17.579633991 | 0 | 1 | 0 | # | ob  |
| 1801 | 21 | 8 | -0.950000 | 10.684199510  | -6.041354729  | 18.956143562 | 0 | 1 | 0 | # | oht |
| 1802 | 21 | 3 | -1.050000 | 12.694590946  | -6.317606791  | 17.316796118 | 0 | 1 | 0 | # | ob  |
| 1803 | 21 | 5 | 2.100000  | 11.115878839  | -6.657050089  | 17.517161151 | 0 | 1 | 0 | # | st  |
| 1804 | 21 | 8 | -0.950000 | 15.171651183  | -12.018171151 | 16.634714390 | 0 | 1 | 0 | # | oht |
| 1805 | 21 | 6 | 0.425000  | 10.761038959  | -6.134001635  | 20.059598264 | 0 | 1 | 0 | # | do  |
| 1806 | 21 | 6 | 0.425000  | 14.783433436  | -11.917786233 | 17.669755394 | 0 | 1 | 0 | # | do  |
| 1807 | 22 | 1 | 1.575000  | -12.923448102 | -9.326242674  | 6.343147493  | 1 | 1 | 0 | # | ao  |
| 1808 | 22 | 1 | 1.575000  | -10.336308114 | -9.336267335  | 2.120047493  | 1 | 1 | 0 | # | ao  |
| 1809 | 22 | 1 | 1.575000  | -15.477924157 | -9.343085446  | 7.691610963  | 1 | 1 | 0 | # | ao  |
| 1810 | 22 | 1 | 1.575000  | -12.890920700 | -9.353073074  | 3.468502305  | 1 | 1 | 0 | # | ao  |
| 1811 | 22 | 2 | 0.425000  | -12.372044145 | -7.958936629  | 1.461851013  | 1 | 1 | 0 | # | ho  |
| 1812 | 22 | 2 | 0.425000  | -14.942477472 | -7.860595847  | 5.731312462  | 1 | 1 | 0 | # | ho  |
| 1813 | 22 | 2 | 0.425000  | -10.870735677 | -10.814890090 | 4.082601022  | 1 | 1 | 0 | # | ho  |
| 1814 | 22 | 2 | 0.425000  | -13.442332585 | -10.720857339 | 8.349425190  | 1 | 1 | 0 | # | ho  |
| 1815 | 22 | 3 | -1.050000 | -13.514079233 | -10.401549350 | 4.908780749  | 1 | 1 | 0 | # | ob  |
| 1816 | 22 | 3 | -1.050000 | -13.899116052 | -10.393634011 | 2.223829865  | 1 | 1 | 0 | # | ob  |
| 1817 | 22 | 3 | -1.050000 | -11.325579590 | -10.386335530 | 6.457577115  | 1 | 1 | 0 | # | ob  |
| 1818 | 22 | 3 | -1.050000 | -13.268649550 | -12.638429459 | 3.535812584  | 1 | 1 | 0 | # | ob  |
| 1819 | 22 | 3 | -1.050000 | -10.684056058 | -12.637628090 | 7.754751701  | 1 | 1 | 0 | # | ob  |
| 1820 | 22 | 3 | -1.050000 | -14.881794217 | -8.275939116  | 0.680433991  | 1 | 1 | 0 | # | ob  |

|      |    |   |           |               |               |              |   |   |   |   |     |
|------|----|---|-----------|---------------|---------------|--------------|---|---|---|---|-----|
| 1821 | 22 | 3 | -1.050000 | -12.300224505 | -8.277784485  | 4.902851743  | 1 | 1 | 0 | # | ob  |
| 1822 | 22 | 3 | -1.050000 | -13.132874866 | -6.044156828  | 3.727147445  | 1 | 1 | 0 | # | ob  |
| 1823 | 22 | 3 | -1.050000 | -10.559457334 | -6.040640091  | 7.955469793  | 1 | 1 | 0 | # | ob  |
| 1824 | 22 | 3 | -1.050000 | -15.129800490 | -6.041354729  | 2.056943562  | 1 | 1 | 0 | # | ob  |
| 1825 | 22 | 3 | -1.050000 | -12.545240482 | -6.041077613  | 6.275700930  | 1 | 1 | 0 | # | ob  |
| 1826 | 22 | 4 | -0.950000 | -14.514582553 | -8.354042618  | 6.456311812  | 1 | 1 | 0 | # | oh  |
| 1827 | 22 | 4 | -0.950000 | -11.929329560 | -8.366735269  | 2.229260000  | 1 | 1 | 0 | # | oh  |
| 1828 | 22 | 3 | -1.050000 | -13.119409054 | -6.317606791  | 0.417596118  | 1 | 1 | 0 | # | ob  |
| 1829 | 22 | 3 | -1.050000 | -10.525124007 | -6.333759730  | 4.648938892  | 1 | 1 | 0 | # | ob  |
| 1830 | 22 | 4 | -0.950000 | -13.885034277 | -10.312589933 | 7.582229270  | 1 | 1 | 0 | # | oh  |
| 1831 | 22 | 3 | -1.050000 | -15.288448515 | -12.345953389 | 5.162916698  | 1 | 1 | 0 | # | ob  |
| 1832 | 22 | 4 | -0.950000 | -11.299423532 | -10.324863219 | 3.355759607  | 1 | 1 | 0 | # | oh  |
| 1833 | 22 | 3 | -1.050000 | -12.694730266 | -12.361777046 | 0.944364434  | 1 | 1 | 0 | # | ob  |
| 1834 | 22 | 3 | -1.050000 | -14.488462728 | -8.292941387  | 3.353842278  | 1 | 1 | 0 | # | ob  |
| 1835 | 22 | 3 | -1.050000 | -11.914914866 | -8.285734762  | 7.587875661  | 1 | 1 | 0 | # | ob  |
| 1836 | 22 | 3 | -1.050000 | -10.932562377 | -10.403223292 | 0.681739972  | 1 | 1 | 0 | # | ob  |
| 1837 | 22 | 3 | -1.050000 | -15.254665415 | -12.638466293 | 1.856176368  | 1 | 1 | 0 | # | ob  |
| 1838 | 22 | 3 | -1.050000 | -12.680712729 | -12.635163569 | 6.084357725  | 1 | 1 | 0 | # | ob  |
| 1839 | 22 | 5 | 2.100000  | -14.611396523 | -6.663500962  | 3.452486522  | 1 | 1 | 0 | # | st  |
| 1840 | 22 | 5 | 2.100000  | -12.039370783 | -6.654519659  | 7.680379551  | 1 | 1 | 0 | # | st  |
| 1841 | 22 | 5 | 2.100000  | -11.116023949 | -12.022163392 | 0.744074984  | 1 | 1 | 0 | # | st  |
| 1842 | 22 | 5 | 2.100000  | -13.774666039 | -12.024860033 | 2.131278354  | 1 | 1 | 0 | # | st  |
| 1843 | 22 | 5 | 2.100000  | -11.202249750 | -12.015782580 | 6.359024273  | 1 | 1 | 0 | # | st  |
| 1844 | 22 | 5 | 2.100000  | -14.698121161 | -6.657050089  | 0.617961151  | 1 | 1 | 0 | # | st  |
| 1845 | 22 | 5 | 2.100000  | -12.109727332 | -6.660702575  | 4.839744045  | 1 | 1 | 0 | # | st  |
| 1846 | 22 | 5 | 2.100000  | -13.703981255 | -12.018795815 | 4.971778212  | 1 | 1 | 0 | # | st  |
| 1847 | 22 | 1 | 1.575000  | -12.923448102 | -9.326242674  | 14.792747493 | 1 | 1 | 0 | # | ao  |
| 1848 | 22 | 1 | 1.575000  | -10.336308114 | -9.336267335  | 10.569647493 | 1 | 1 | 0 | # | ao  |
| 1849 | 22 | 1 | 1.575000  | -15.477924157 | -9.343085446  | 16.141210963 | 1 | 1 | 0 | # | ao  |
| 1850 | 22 | 1 | 1.575000  | -12.890920700 | -9.353073074  | 11.918102305 | 1 | 1 | 0 | # | ao  |
| 1851 | 22 | 2 | 0.425000  | -12.372044145 | -7.958936629  | 9.911451013  | 1 | 1 | 0 | # | ho  |
| 1852 | 22 | 2 | 0.425000  | -14.942477472 | -7.860595847  | 14.180912462 | 1 | 1 | 0 | # | ho  |
| 1853 | 22 | 2 | 0.425000  | -10.870735677 | -10.814890090 | 12.532201022 | 1 | 1 | 0 | # | ho  |
| 1854 | 22 | 6 | 0.425000  | -13.442332585 | -10.720857339 | 16.799025190 | 1 | 1 | 0 | # | do  |
| 1855 | 22 | 3 | -1.050000 | -13.514079233 | -10.401549350 | 13.358380749 | 1 | 1 | 0 | # | ob  |
| 1856 | 22 | 3 | -1.050000 | -13.899116052 | -10.393634011 | 10.673429865 | 1 | 1 | 0 | # | ob  |
| 1857 | 22 | 3 | -1.050000 | -11.325579590 | -10.386335530 | 14.907177115 | 1 | 1 | 0 | # | ob  |
| 1858 | 22 | 3 | -1.050000 | -13.268649550 | -12.638429459 | 11.985412584 | 1 | 1 | 0 | # | ob  |
| 1859 | 22 | 3 | -1.050000 | -14.881794217 | -8.275939116  | 9.130033991  | 1 | 1 | 0 | # | ob  |
| 1860 | 22 | 3 | -1.050000 | -12.300224505 | -8.277784485  | 13.352451743 | 1 | 1 | 0 | # | ob  |
| 1861 | 22 | 3 | -1.050000 | -13.132874866 | -6.044156828  | 12.176747445 | 1 | 1 | 0 | # | ob  |
| 1862 | 22 | 3 | -1.050000 | -10.559457334 | -6.040640091  | 16.405069793 | 1 | 1 | 0 | # | ob  |
| 1863 | 22 | 3 | -1.050000 | -15.129800490 | -6.041354729  | 10.506543562 | 1 | 1 | 0 | # | ob  |
| 1864 | 22 | 3 | -1.050000 | -12.545240482 | -6.041077613  | 14.725300930 | 1 | 1 | 0 | # | ob  |
| 1865 | 22 | 4 | -0.950000 | -14.514582553 | -8.354042618  | 14.905911812 | 1 | 1 | 0 | # | oh  |
| 1866 | 22 | 4 | -0.950000 | -11.929329560 | -8.366735269  | 10.678860000 | 1 | 1 | 0 | # | oh  |
| 1867 | 22 | 3 | -1.050000 | -13.119409054 | -6.317606791  | 8.867196118  | 1 | 1 | 0 | # | ob  |
| 1868 | 22 | 3 | -1.050000 | -10.525124007 | -6.333759730  | 13.098538892 | 1 | 1 | 0 | # | ob  |
| 1869 | 22 | 7 | -0.950000 | -13.885034277 | -10.312589933 | 16.031829270 | 1 | 1 | 0 | # | oh  |
| 1870 | 22 | 3 | -1.050000 | -15.288448515 | -12.345953389 | 13.612516698 | 1 | 1 | 0 | # | ob  |
| 1871 | 22 | 4 | -0.950000 | -11.299423532 | -10.324863219 | 11.805359607 | 1 | 1 | 0 | # | oh  |
| 1872 | 22 | 3 | -1.050000 | -12.694730266 | -12.361777046 | 9.393964434  | 1 | 1 | 0 | # | ob  |
| 1873 | 22 | 3 | -1.050000 | -14.488462728 | -8.292941387  | 11.803442278 | 1 | 1 | 0 | # | ob  |
| 1874 | 22 | 3 | -1.050000 | -11.914914866 | -8.285734762  | 16.037475661 | 1 | 1 | 0 | # | ob  |
| 1875 | 22 | 3 | -1.050000 | -10.932562377 | -10.403223292 | 9.131339972  | 1 | 1 | 0 | # | ob  |
| 1876 | 22 | 3 | -1.050000 | -15.254665415 | -12.638466293 | 10.305776368 | 1 | 1 | 0 | # | ob  |
| 1877 | 22 | 3 | -1.050000 | -12.680712729 | -12.635163569 | 14.533957725 | 1 | 1 | 0 | # | ob  |
| 1878 | 22 | 5 | 2.100000  | -14.611396523 | -6.663500962  | 11.902086522 | 1 | 1 | 0 | # | st  |
| 1879 | 22 | 5 | 2.100000  | -12.039370783 | -6.654519659  | 16.129979551 | 1 | 1 | 0 | # | st  |
| 1880 | 22 | 5 | 2.100000  | -11.116023949 | -12.022163392 | 9.193674984  | 1 | 1 | 0 | # | st  |
| 1881 | 22 | 5 | 2.100000  | -13.774666039 | -12.024860033 | 10.580878354 | 1 | 1 | 0 | # | st  |
| 1882 | 22 | 5 | 2.100000  | -11.202249750 | -12.015782580 | 14.808624273 | 1 | 1 | 0 | # | st  |
| 1883 | 22 | 5 | 2.100000  | -14.698121161 | -6.657050089  | 9.067561151  | 1 | 1 | 0 | # | st  |
| 1884 | 22 | 5 | 2.100000  | -12.109727332 | -6.660702575  | 13.289344045 | 1 | 1 | 0 | # | st  |
| 1885 | 22 | 5 | 2.100000  | -13.703981255 | -12.018795815 | 13.421378212 | 1 | 1 | 0 | # | st  |
| 1886 | 22 | 3 | -1.050000 | -14.881794217 | -8.275939116  | 17.579633991 | 1 | 1 | 0 | # | ob  |
| 1887 | 22 | 8 | -0.950000 | -15.129800490 | -6.041354729  | 18.956143562 | 1 | 1 | 0 | # | oht |
| 1888 | 22 | 3 | -1.050000 | -13.119409054 | -6.317606791  | 17.316796118 | 1 | 1 | 0 | # | ob  |
| 1889 | 22 | 5 | 2.100000  | -14.698121161 | -6.657050089  | 17.517161151 | 1 | 1 | 0 | # | st  |
| 1890 | 22 | 8 | -0.950000 | -10.642348817 | -12.018171151 | 16.634714390 | 1 | 1 | 0 | # | oht |
| 1891 | 22 | 6 | 0.425000  | -15.052961041 | -6.134001635  | 20.059598264 | 1 | 1 | 0 | # | do  |
| 1892 | 22 | 6 | 0.425000  | -11.030566564 | -11.917786233 | 17.669755394 | 1 | 1 | 0 | # | do  |
| 1893 | 23 | 1 | 1.575000  | -7.760648102  | -9.326242674  | 6.343147493  | 1 | 1 | 0 | # | ao  |
| 1894 | 23 | 1 | 1.575000  | -5.173508114  | -9.336267335  | 2.120047493  | 1 | 1 | 0 | # | ao  |
| 1895 | 23 | 1 | 1.575000  | -10.315124157 | -9.343085446  | 7.691610963  | 1 | 1 | 0 | # | ao  |
| 1896 | 23 | 1 | 1.575000  | -7.728120700  | -9.353073074  | 3.468502305  | 1 | 1 | 0 | # | ao  |
| 1897 | 23 | 2 | 0.425000  | -7.209244145  | -7.958936629  | 1.461851013  | 1 | 1 | 0 | # | ho  |
| 1898 | 23 | 2 | 0.425000  | -9.779677472  | -7.860595847  | 5.731312462  | 1 | 1 | 0 | # | ho  |
| 1899 | 23 | 2 | 0.425000  | -5.707935677  | -10.814890090 | 4.082601022  | 1 | 1 | 0 | # | ho  |
| 1900 | 23 | 2 | 0.425000  | -8.279532585  | -10.720857339 | 8.349425190  | 1 | 1 | 0 | # | ho  |
| 1901 | 23 | 3 | -1.050000 | -8.351279233  | -10.401549350 | 4.908780749  | 1 | 1 | 0 | # | ob  |
| 1902 | 23 | 3 | -1.050000 | -8.736316052  | -10.393634011 | 2.223829865  | 1 | 1 | 0 | # | ob  |
| 1903 | 23 | 3 | -1.050000 | -6.162779590  | -10.386335530 | 6.457577115  | 1 | 1 | 0 | # | ob  |
| 1904 | 23 | 3 | -1.050000 | -8.105849550  | -12.638429459 | 3.335812584  | 1 | 1 | 0 | # | ob  |
| 1905 | 23 | 3 | -1.050000 | -5.521256058  | -12.637628090 | 7.754751701  | 1 | 1 | 0 | # | ob  |
| 1906 | 23 | 3 | -1.050000 | -9.718994217  | -8.275939116  | 0.680433991  | 1 | 1 | 0 | # | ob  |
| 1907 | 23 | 3 | -1.050000 | -7.137424505  | -8.277784485  | 4.902851743  | 1 | 1 | 0 | # | ob  |
| 1908 | 23 | 3 | -1.050000 | -7.970074866  | -6.044156828  | 3.727147445  | 1 | 1 | 0 | # | ob  |
| 1909 | 23 | 3 | -1.050000 | -5.396657334  | -6.040640091  | 7.955469793  | 1 | 1 | 0 | # | ob  |
| 1910 | 23 | 3 | -1.050000 | -9.967000490  | -6.041354729  | 2.056943562  | 1 | 1 | 0 | # | ob  |
| 1911 | 23 | 3 | -1.050000 | -7.382440482  | -6.041077613  | 6.275700930  | 1 | 1 | 0 | # | ob  |
| 1912 | 23 | 4 | -0.950000 | -9.351782553  | -8.354042618  | 6.456311812  | 1 | 1 | 0 | # | oh  |
| 1913 | 23 | 4 | -0.950000 | -6.766529560  | -8.366735269  | 2.229260000  | 1 | 1 | 0 | # | oh  |

|      |    |   |           |               |               |              |   |   |   |   |     |
|------|----|---|-----------|---------------|---------------|--------------|---|---|---|---|-----|
| 1914 | 23 | 3 | -1.050000 | -7.956609054  | -6.317606791  | 0.417596118  | 1 | 1 | 0 | # | ob  |
| 1915 | 23 | 3 | -1.050000 | -5.362324007  | -6.333759730  | 4.648938892  | 1 | 1 | 0 | # | ob  |
| 1916 | 23 | 4 | -0.950000 | -8.722234277  | -10.312589933 | 7.582229270  | 1 | 1 | 0 | # | oh  |
| 1917 | 23 | 3 | -1.050000 | -10.125648515 | -12.345953389 | 5.162916698  | 1 | 1 | 0 | # | ob  |
| 1918 | 23 | 4 | -0.950000 | -6.136623532  | -10.324863219 | 3.355759607  | 1 | 1 | 0 | # | oh  |
| 1919 | 23 | 3 | -1.050000 | -7.531930266  | -12.361777046 | 0.944364434  | 1 | 1 | 0 | # | ob  |
| 1920 | 23 | 3 | -1.050000 | -9.325662728  | -8.292941387  | 3.353842278  | 1 | 1 | 0 | # | ob  |
| 1921 | 23 | 3 | -1.050000 | -6.752114866  | -8.285734762  | 7.587875661  | 1 | 1 | 0 | # | ob  |
| 1922 | 23 | 3 | -1.050000 | -5.769762377  | -10.403223292 | 0.681739972  | 1 | 1 | 0 | # | ob  |
| 1923 | 23 | 3 | -1.050000 | -10.091865415 | -12.638466293 | 1.856176368  | 1 | 1 | 0 | # | ob  |
| 1924 | 23 | 3 | -1.050000 | -7.517912729  | -12.635163569 | 6.084357725  | 1 | 1 | 0 | # | ob  |
| 1925 | 23 | 5 | 2.100000  | -9.448596523  | -6.663500962  | 3.452486522  | 1 | 1 | 0 | # | st  |
| 1926 | 23 | 5 | 2.100000  | -6.876570783  | -6.654519659  | 7.680379551  | 1 | 1 | 0 | # | st  |
| 1927 | 23 | 5 | 2.100000  | -5.953223949  | -12.022163392 | 0.744074984  | 1 | 1 | 0 | # | st  |
| 1928 | 23 | 5 | 2.100000  | -8.611866039  | -12.024860033 | 2.131278354  | 1 | 1 | 0 | # | st  |
| 1929 | 23 | 5 | 2.100000  | -6.039449750  | -12.015782580 | 6.359024273  | 1 | 1 | 0 | # | st  |
| 1930 | 23 | 5 | 2.100000  | -9.535321161  | -6.657050089  | 0.617961151  | 1 | 1 | 0 | # | st  |
| 1931 | 23 | 5 | 2.100000  | -6.946927332  | -6.660702575  | 4.839744045  | 1 | 1 | 0 | # | st  |
| 1932 | 23 | 5 | 2.100000  | -8.541181255  | -12.018795815 | 4.971778212  | 1 | 1 | 0 | # | st  |
| 1933 | 23 | 1 | 1.575000  | -7.760648102  | -9.326242674  | 14.792747493 | 1 | 1 | 0 | # | ao  |
| 1934 | 23 | 1 | 1.575000  | -5.173508114  | -9.336267335  | 10.569647493 | 1 | 1 | 0 | # | ao  |
| 1935 | 23 | 1 | 1.575000  | -10.315124157 | -9.343085446  | 16.141210963 | 1 | 1 | 0 | # | ao  |
| 1936 | 23 | 1 | 1.575000  | -7.728120700  | -9.353073074  | 11.918102305 | 1 | 1 | 0 | # | ao  |
| 1937 | 23 | 2 | 0.425000  | -7.209244145  | -7.958936629  | 9.911451013  | 1 | 1 | 0 | # | ho  |
| 1938 | 23 | 2 | 0.425000  | -9.779677472  | -7.860595847  | 14.180912462 | 1 | 1 | 0 | # | ho  |
| 1939 | 23 | 2 | 0.425000  | -5.707935677  | -10.814890090 | 12.532201022 | 1 | 1 | 0 | # | ho  |
| 1940 | 23 | 6 | 0.425000  | -8.279532585  | -10.720857339 | 16.799025190 | 1 | 1 | 0 | # | do  |
| 1941 | 23 | 3 | -1.050000 | -8.351279233  | -10.401549350 | 13.358380749 | 1 | 1 | 0 | # | ob  |
| 1942 | 23 | 3 | -1.050000 | -8.736316052  | -10.393634011 | 10.673429865 | 1 | 1 | 0 | # | ob  |
| 1943 | 23 | 3 | -1.050000 | -6.162779590  | -10.386335530 | 14.907177115 | 1 | 1 | 0 | # | ob  |
| 1944 | 23 | 3 | -1.050000 | -8.105849550  | -12.638429459 | 11.985412584 | 1 | 1 | 0 | # | ob  |
| 1945 | 23 | 3 | -1.050000 | -9.718994217  | -8.275939116  | 9.130033991  | 1 | 1 | 0 | # | ob  |
| 1946 | 23 | 3 | -1.050000 | -7.137424505  | -8.277784485  | 13.325451743 | 1 | 1 | 0 | # | ob  |
| 1947 | 23 | 3 | -1.050000 | -7.970074866  | -6.044156828  | 12.176747445 | 1 | 1 | 0 | # | ob  |
| 1948 | 23 | 3 | -1.050000 | -5.396657334  | -6.040640091  | 16.405069793 | 1 | 1 | 0 | # | ob  |
| 1949 | 23 | 3 | -1.050000 | -9.967000490  | -6.041354729  | 10.506543562 | 1 | 1 | 0 | # | ob  |
| 1950 | 23 | 3 | -1.050000 | -7.382440482  | -6.041077613  | 14.725300930 | 1 | 1 | 0 | # | ob  |
| 1951 | 23 | 4 | -0.950000 | -9.351782553  | -8.354042618  | 14.905911812 | 1 | 1 | 0 | # | oh  |
| 1952 | 23 | 4 | -0.950000 | -6.766529560  | -8.366735269  | 10.678860000 | 1 | 1 | 0 | # | oh  |
| 1953 | 23 | 3 | -1.050000 | -7.956609054  | -6.317606791  | 8.867196118  | 1 | 1 | 0 | # | ob  |
| 1954 | 23 | 3 | -1.050000 | -5.362324007  | -6.333759730  | 13.098538892 | 1 | 1 | 0 | # | ob  |
| 1955 | 23 | 7 | -0.950000 | -8.722234277  | -10.312589933 | 16.031829270 | 1 | 1 | 0 | # | oho |
| 1956 | 23 | 3 | -1.050000 | -10.125648515 | -12.345953389 | 13.612516698 | 1 | 1 | 0 | # | ob  |
| 1957 | 23 | 4 | -0.950000 | -6.136623532  | -10.324863219 | 11.805359607 | 1 | 1 | 0 | # | oh  |
| 1958 | 23 | 3 | -1.050000 | -7.531930266  | -12.361777046 | 9.393964434  | 1 | 1 | 0 | # | ob  |
| 1959 | 23 | 3 | -1.050000 | -9.325662728  | -8.292941387  | 11.803442278 | 1 | 1 | 0 | # | ob  |
| 1960 | 23 | 3 | -1.050000 | -6.752114866  | -8.285734762  | 16.037475661 | 1 | 1 | 0 | # | ob  |
| 1961 | 23 | 3 | -1.050000 | -5.769762377  | -10.403223292 | 9.131339972  | 1 | 1 | 0 | # | ob  |
| 1962 | 23 | 3 | -1.050000 | -10.091865415 | -12.638466293 | 10.305776368 | 1 | 1 | 0 | # | ob  |
| 1963 | 23 | 3 | -1.050000 | -7.517912729  | -12.635163569 | 14.533957725 | 1 | 1 | 0 | # | ob  |
| 1964 | 23 | 5 | 2.100000  | -9.448596523  | -6.663500962  | 11.902086522 | 1 | 1 | 0 | # | st  |
| 1965 | 23 | 5 | 2.100000  | -6.876570783  | -6.654519659  | 16.129979551 | 1 | 1 | 0 | # | st  |
| 1966 | 23 | 5 | 2.100000  | -5.953223949  | -12.022163392 | 9.193674984  | 1 | 1 | 0 | # | st  |
| 1967 | 23 | 5 | 2.100000  | -8.611866039  | -12.024860033 | 10.580878354 | 1 | 1 | 0 | # | st  |
| 1968 | 23 | 5 | 2.100000  | -6.039449750  | -12.015782580 | 14.808624273 | 1 | 1 | 0 | # | st  |
| 1969 | 23 | 5 | 2.100000  | -9.535321161  | -6.657050089  | 9.067561151  | 1 | 1 | 0 | # | st  |
| 1970 | 23 | 5 | 2.100000  | -6.946927332  | -6.660702575  | 13.289344045 | 1 | 1 | 0 | # | st  |
| 1971 | 23 | 5 | 2.100000  | -8.541181255  | -12.018795815 | 13.421378212 | 1 | 1 | 0 | # | st  |
| 1972 | 23 | 3 | -1.050000 | -9.718994217  | -8.275939116  | 17.579633991 | 1 | 1 | 0 | # | ob  |
| 1973 | 23 | 8 | -0.950000 | -9.967000490  | -6.041354729  | 18.956143562 | 1 | 1 | 0 | # | oht |
| 1974 | 23 | 3 | -1.050000 | -7.956609054  | -6.317606791  | 17.316796118 | 1 | 1 | 0 | # | ob  |
| 1975 | 23 | 5 | 2.100000  | -9.535321161  | -6.657050089  | 17.517161151 | 1 | 1 | 0 | # | st  |
| 1976 | 23 | 8 | -0.950000 | -5.479548817  | -12.018171151 | 16.634714390 | 1 | 1 | 0 | # | oht |
| 1977 | 23 | 6 | 0.425000  | -9.890161041  | -6.134001635  | 20.059598264 | 1 | 1 | 0 | # | do  |
| 1978 | 23 | 6 | 0.425000  | -5.867766564  | -11.917786233 | 17.669755394 | 1 | 1 | 0 | # | do  |
| 1979 | 24 | 1 | 1.575000  | -2.597848102  | -9.326242674  | 6.343147493  | 1 | 1 | 0 | # | ao  |
| 1980 | 24 | 1 | 1.575000  | -0.010708114  | -9.336267335  | 2.120047493  | 1 | 1 | 0 | # | ao  |
| 1981 | 24 | 1 | 1.575000  | -5.152324157  | -9.343085446  | 7.691610963  | 1 | 1 | 0 | # | ao  |
| 1982 | 24 | 1 | 1.575000  | -2.565320700  | -9.353073074  | 3.468502305  | 1 | 1 | 0 | # | ao  |
| 1983 | 24 | 2 | 0.425000  | -2.046444145  | -7.958936629  | 1.461851013  | 1 | 1 | 0 | # | ho  |
| 1984 | 24 | 2 | 0.425000  | -4.616877472  | -7.860595847  | 5.731312462  | 1 | 1 | 0 | # | ho  |
| 1985 | 24 | 2 | 0.425000  | -0.545135677  | -10.814890090 | 4.082601022  | 1 | 1 | 0 | # | ho  |
| 1986 | 24 | 2 | 0.425000  | -3.116732585  | -10.720857339 | 8.349425190  | 1 | 1 | 0 | # | ho  |
| 1987 | 24 | 3 | -1.050000 | -3.188479233  | -10.401549350 | 4.908780749  | 1 | 1 | 0 | # | ob  |
| 1988 | 24 | 3 | -1.050000 | -3.573516052  | -10.393634011 | 2.223829865  | 1 | 1 | 0 | # | ob  |
| 1989 | 24 | 3 | -1.050000 | -0.999979590  | -10.386335530 | 6.457577115  | 1 | 1 | 0 | # | ob  |
| 1990 | 24 | 3 | -1.050000 | -2.943049550  | -12.638429459 | 3.535812584  | 1 | 1 | 0 | # | ob  |
| 1991 | 24 | 3 | -1.050000 | -0.358456058  | -12.637628090 | 7.754751701  | 1 | 1 | 0 | # | ob  |
| 1992 | 24 | 3 | -1.050000 | -4.556194217  | -8.275939116  | 0.680433991  | 1 | 1 | 0 | # | ob  |
| 1993 | 24 | 3 | -1.050000 | -1.974624505  | -8.277784485  | 4.902851743  | 1 | 1 | 0 | # | ob  |
| 1994 | 24 | 3 | -1.050000 | -2.807274866  | -6.044156828  | 3.727147445  | 1 | 1 | 0 | # | ob  |
| 1995 | 24 | 3 | -1.050000 | -0.233857334  | -6.040640091  | 7.955469793  | 1 | 1 | 0 | # | ob  |
| 1996 | 24 | 3 | -1.050000 | -4.804200490  | -6.041354729  | 2.056943562  | 1 | 1 | 0 | # | ob  |
| 1997 | 24 | 3 | -1.050000 | -2.219640482  | -6.041077613  | 6.275700930  | 1 | 1 | 0 | # | ob  |
| 1998 | 24 | 4 | -0.950000 | -4.188982553  | -8.354042618  | 6.456311812  | 1 | 1 | 0 | # | oh  |
| 1999 | 24 | 4 | -0.950000 | -1.603729560  | -8.366735269  | 2.229260000  | 1 | 1 | 0 | # | oh  |
| 2000 | 24 | 3 | -1.050000 | -2.793809054  | -6.317606791  | 0.417596118  | 1 | 1 | 0 | # | ob  |
| 2001 | 24 | 3 | -1.050000 | -0.199524007  | -6.333759730  | 4.648938892  | 1 | 1 | 0 | # | ob  |
| 2002 | 24 | 4 | -0.950000 | -3.559434277  | -10.312589933 | 7.582229270  | 1 | 1 | 0 | # | oh  |
| 2003 | 24 | 3 | -1.050000 | -4.962848515  | -12.345953389 | 5.162916698  | 1 | 1 | 0 | # | ob  |
| 2004 | 24 | 4 | -0.950000 | -0.973823532  | -10.324863219 | 3.355759607  | 1 | 1 | 0 | # | oh  |
| 2005 | 24 | 3 | -1.050000 | -2.369130266  | -12.361777046 | 0.944364434  | 1 | 1 | 0 | # | ob  |
| 2006 | 24 | 3 | -1.050000 | -4.162862728  | -8.292941387  | 3.353842278  | 1 | 1 | 0 | # | ob  |

|      |    |   |           |              |               |               |   |   |   |   |     |
|------|----|---|-----------|--------------|---------------|---------------|---|---|---|---|-----|
| 2007 | 24 | 3 | -1.050000 | -1.589314866 | -8.285734762  | 7.587875661   | 1 | 1 | 0 | # | ob  |
| 2008 | 24 | 3 | -1.050000 | -0.606962377 | -10.403223292 | 0.681739972   | 1 | 1 | 0 | # | ob  |
| 2009 | 24 | 3 | -1.050000 | -4.929065415 | -12.638466293 | 1.856176368   | 1 | 1 | 0 | # | ob  |
| 2010 | 24 | 3 | -1.050000 | -2.355112729 | -12.635163569 | 6.084357725   | 1 | 1 | 0 | # | ob  |
| 2011 | 24 | 5 | 2.100000  | -4.285796523 | -6.663500962  | 3.452486522   | 1 | 1 | 0 | # | st  |
| 2012 | 24 | 5 | 2.100000  | -1.713770783 | -6.654519659  | 7.680379551   | 1 | 1 | 0 | # | st  |
| 2013 | 24 | 5 | 2.100000  | -0.790423949 | -12.022163392 | 0.744074984   | 1 | 1 | 0 | # | st  |
| 2014 | 24 | 5 | 2.100000  | -3.449066039 | -12.024860033 | 2.131278354   | 1 | 1 | 0 | # | st  |
| 2015 | 24 | 5 | 2.100000  | -0.876649750 | -12.015782580 | 6.359024273   | 1 | 1 | 0 | # | st  |
| 2016 | 24 | 5 | 2.100000  | -4.372521161 | -6.657050089  | 0.617961151   | 1 | 1 | 0 | # | st  |
| 2017 | 24 | 5 | 2.100000  | -1.784127332 | -6.660702575  | 4.839744045   | 1 | 1 | 0 | # | st  |
| 2018 | 24 | 5 | 2.100000  | -3.378381255 | -12.018795815 | 4.971778212   | 1 | 1 | 0 | # | st  |
| 2019 | 24 | 1 | 1.575000  | -2.597848102 | -9.326242674  | 14.792747493  | 1 | 1 | 0 | # | ao  |
| 2020 | 24 | 1 | 1.575000  | -0.010708114 | -9.336267335  | 10.569647493  | 1 | 1 | 0 | # | ao  |
| 2021 | 24 | 1 | 1.575000  | -5.152324157 | -9.343085446  | 16.141210963  | 1 | 1 | 0 | # | ao  |
| 2022 | 24 | 1 | 1.575000  | -2.565320700 | -9.353073074  | 11.918102305  | 1 | 1 | 0 | # | ao  |
| 2023 | 24 | 2 | 0.425000  | -2.046444145 | -7.958936629  | 9.911451013   | 1 | 1 | 0 | # | ho  |
| 2024 | 24 | 2 | 0.425000  | -4.616877472 | -7.860595847  | 14.180912462  | 1 | 1 | 0 | # | ho  |
| 2025 | 24 | 2 | 0.425000  | -0.545135677 | -10.814890090 | 12.532201022  | 1 | 1 | 0 | # | ho  |
| 2026 | 24 | 6 | 0.425000  | -3.116732585 | -10.720857339 | 16.799025190  | 1 | 1 | 0 | # | do  |
| 2027 | 24 | 3 | -1.050000 | -3.188479233 | -10.401549350 | 13.358380749  | 1 | 1 | 0 | # | ob  |
| 2028 | 24 | 3 | -1.050000 | -3.573516052 | -10.393634011 | 10.673429865  | 1 | 1 | 0 | # | ob  |
| 2029 | 24 | 3 | -1.050000 | -0.999979590 | -10.386335530 | 14.907177115  | 1 | 1 | 0 | # | ob  |
| 2030 | 24 | 3 | -1.050000 | -2.943049550 | -12.638429459 | 11.985412584  | 1 | 1 | 0 | # | ob  |
| 2031 | 24 | 3 | -1.050000 | -4.556194217 | -8.275939116  | 9.130033991   | 1 | 1 | 0 | # | ob  |
| 2032 | 24 | 3 | -1.050000 | -1.974624505 | -8.277784485  | 13.352451743  | 1 | 1 | 0 | # | ob  |
| 2033 | 24 | 3 | -1.050000 | -2.807274866 | -6.044156828  | 12.176747445  | 1 | 1 | 0 | # | ob  |
| 2034 | 24 | 3 | -1.050000 | -0.233857334 | -6.040640091  | 16.405069793  | 1 | 1 | 0 | # | ob  |
| 2035 | 24 | 3 | -1.050000 | -4.804200490 | -6.041354729  | 10.506543562  | 1 | 1 | 0 | # | ob  |
| 2036 | 24 | 3 | -1.050000 | -2.219640482 | -6.041077613  | 14.725300930  | 1 | 1 | 0 | # | ob  |
| 2037 | 24 | 4 | -0.950000 | -4.188982553 | -8.354042618  | 14.905911812  | 1 | 1 | 0 | # | oh  |
| 2038 | 24 | 4 | -0.950000 | -1.603729560 | -8.366735269  | 10.678860000  | 1 | 1 | 0 | # | oh  |
| 2039 | 24 | 3 | -1.050000 | -2.793809054 | -6.317606791  | 8.867196118   | 1 | 1 | 0 | # | ob  |
| 2040 | 24 | 3 | -1.050000 | -0.199524007 | -6.333759730  | 13.098538892  | 1 | 1 | 0 | # | ob  |
| 2041 | 24 | 7 | -0.950000 | -3.559434277 | -10.312589933 | 16.031829270  | 1 | 1 | 0 | # | oho |
| 2042 | 24 | 3 | -1.050000 | -4.962848515 | -12.345953389 | 13.612516698  | 1 | 1 | 0 | # | ob  |
| 2043 | 24 | 4 | -0.950000 | -0.973823532 | -10.324863219 | 11.805359607  | 1 | 1 | 0 | # | oh  |
| 2044 | 24 | 3 | -1.050000 | -2.369130266 | -12.361777046 | 9.393964434   | 1 | 1 | 0 | # | ob  |
| 2045 | 24 | 3 | -1.050000 | -4.162862728 | -8.292941387  | 11.803442278  | 1 | 1 | 0 | # | ob  |
| 2046 | 24 | 3 | -1.050000 | -1.589314866 | -8.285734762  | 16.037475661  | 1 | 1 | 0 | # | ob  |
| 2047 | 24 | 3 | -1.050000 | -0.606962377 | -10.403223292 | 9.131339972   | 1 | 1 | 0 | # | ob  |
| 2048 | 24 | 3 | -1.050000 | -4.929065415 | -12.638466293 | 10.305776368  | 1 | 1 | 0 | # | ob  |
| 2049 | 24 | 3 | -1.050000 | -2.355112729 | -12.635163569 | 14.533957725  | 1 | 1 | 0 | # | ob  |
| 2050 | 24 | 5 | 2.100000  | -4.285796523 | -6.663500962  | 11.902086522  | 1 | 1 | 0 | # | st  |
| 2051 | 24 | 5 | 2.100000  | -1.713770783 | -6.654519659  | 16.129979551  | 1 | 1 | 0 | # | st  |
| 2052 | 24 | 5 | 2.100000  | -0.790423949 | -12.022163392 | 9.193674984   | 1 | 1 | 0 | # | st  |
| 2053 | 24 | 5 | 2.100000  | -3.449066039 | -12.024860033 | 10.580878354  | 1 | 1 | 0 | # | st  |
| 2054 | 24 | 5 | 2.100000  | -0.876649750 | -12.015782580 | 14.808624273  | 1 | 1 | 0 | # | st  |
| 2055 | 24 | 5 | 2.100000  | -4.372521161 | -6.657050089  | 9.067561151   | 1 | 1 | 0 | # | st  |
| 2056 | 24 | 5 | 2.100000  | -1.784127332 | -6.660702575  | 13.289344045  | 1 | 1 | 0 | # | st  |
| 2057 | 24 | 5 | 2.100000  | -3.378381255 | -12.018795815 | 13.421378212  | 1 | 1 | 0 | # | st  |
| 2058 | 24 | 3 | -1.050000 | -4.556194217 | -8.275939116  | 17.579633991  | 1 | 1 | 0 | # | ob  |
| 2059 | 24 | 8 | -0.950000 | -4.804200490 | -6.041354729  | 18.956143562  | 1 | 1 | 0 | # | oht |
| 2060 | 24 | 3 | -1.050000 | -2.793809054 | -6.317606791  | 17.316796118  | 1 | 1 | 0 | # | ob  |
| 2061 | 24 | 5 | 2.100000  | -4.372521161 | -6.657050089  | 17.517161151  | 1 | 1 | 0 | # | st  |
| 2062 | 24 | 8 | -0.950000 | -0.316748817 | -12.018171151 | 16.634714390  | 1 | 1 | 0 | # | oht |
| 2063 | 24 | 6 | 0.425000  | -4.727361041 | -6.134001635  | 20.059598264  | 1 | 1 | 0 | # | do  |
| 2064 | 24 | 6 | 0.425000  | -0.704966564 | -11.917786233 | 17.669755394  | 1 | 1 | 0 | # | do  |
| 2065 | 25 | 8 | -0.950000 | 4.804343942  | -3.253528090  | -17.594048299 | 0 | 0 | 0 | # | oht |
| 2066 | 25 | 1 | 1.575000  | 2.564951898  | 0.057857326   | -10.556052507 | 0 | 0 | 0 | # | ao  |
| 2067 | 25 | 1 | 1.575000  | 5.152091886  | 0.047832665   | -14.779152507 | 0 | 0 | 0 | # | ao  |
| 2068 | 25 | 1 | 1.575000  | 0.010475843  | 0.041014554   | -9.207589037  | 0 | 0 | 0 | # | ao  |
| 2069 | 25 | 1 | 1.575000  | 2.597479300  | 0.031026926   | -13.430697695 | 0 | 0 | 0 | # | ao  |
| 2070 | 25 | 6 | 0.425000  | 3.116355855  | 1.425163371   | -15.437348987 | 0 | 0 | 0 | # | do  |
| 2071 | 25 | 2 | 0.425000  | 0.545922528  | 1.523504153   | -11.167887538 | 0 | 0 | 0 | # | ho  |
| 2072 | 25 | 2 | 0.425000  | 4.617664323  | -1.430790090  | -12.816598978 | 0 | 0 | 0 | # | ho  |
| 2073 | 25 | 2 | 0.425000  | 2.046067415  | -1.336757339  | -8.549774810  | 0 | 0 | 0 | # | ho  |
| 2074 | 25 | 3 | -1.050000 | 1.974320767  | -1.017449350  | -11.990419251 | 0 | 0 | 0 | # | ob  |
| 2075 | 25 | 3 | -1.050000 | 1.589283948  | -1.009534011  | -14.675370135 | 0 | 0 | 0 | # | ob  |
| 2076 | 25 | 3 | -1.050000 | 4.162820410  | -1.002235530  | -10.441622885 | 0 | 0 | 0 | # | ob  |
| 2077 | 25 | 3 | -1.050000 | 2.219750450  | -3.254329459  | -13.363387416 | 0 | 0 | 0 | # | ob  |
| 2078 | 25 | 3 | -1.050000 | 4.804343942  | -3.253528090  | -9.144448299  | 0 | 0 | 0 | # | ob  |
| 2079 | 25 | 3 | -1.050000 | 3.188175495  | 1.106315515   | -11.996348257 | 0 | 0 | 0 | # | ob  |
| 2080 | 25 | 3 | -1.050000 | 2.355525134  | 3.339943172   | -13.172052555 | 0 | 0 | 0 | # | ob  |
| 2081 | 25 | 3 | -1.050000 | 4.928942666  | 3.343459909   | -8.943730207  | 0 | 0 | 0 | # | ob  |
| 2082 | 25 | 3 | -1.050000 | 2.943159518  | 3.343022387   | -10.623499070 | 0 | 0 | 0 | # | ob  |
| 2083 | 25 | 4 | -0.950000 | 0.973817447  | 1.030057382   | -10.442888188 | 0 | 0 | 0 | # | oh  |
| 2084 | 25 | 7 | -0.950000 | 3.559070440  | 1.017364731   | -14.669940000 | 0 | 0 | 0 | # | oho |
| 2085 | 25 | 3 | -1.050000 | 4.963275993  | 3.050340270   | -12.250261108 | 0 | 0 | 0 | # | ob  |
| 2086 | 25 | 4 | -0.950000 | 1.603365723  | -0.928489933  | -9.316970730  | 0 | 0 | 0 | # | oh  |
| 2087 | 25 | 3 | -1.050000 | 0.199951485  | -2.961853389  | -11.736283302 | 0 | 0 | 0 | # | ob  |
| 2088 | 25 | 4 | -0.950000 | 4.188976468  | -0.940763219  | -13.543440393 | 0 | 0 | 0 | # | oh  |
| 2089 | 25 | 3 | -1.050000 | 2.793669734  | -2.977677046  | -15.954835566 | 0 | 0 | 0 | # | ob  |
| 2090 | 25 | 3 | -1.050000 | 0.999937272  | 1.091158613   | -13.545357722 | 0 | 0 | 0 | # | ob  |
| 2091 | 25 | 3 | -1.050000 | 3.573485134  | 1.098365238   | -9.311324339  | 0 | 0 | 0 | # | ob  |
| 2092 | 25 | 3 | -1.050000 | 4.555837623  | -1.019123292  | -16.217460028 | 0 | 0 | 0 | # | ob  |
| 2093 | 25 | 3 | -1.050000 | 0.233734585  | -3.254366293  | -15.043023632 | 0 | 0 | 0 | # | ob  |
| 2094 | 25 | 3 | -1.050000 | 2.807687271  | -3.251063569  | -10.814842275 | 0 | 0 | 0 | # | ob  |
| 2095 | 25 | 5 | 2.100000  | 0.877003477  | 2.720599038   | -13.446713478 | 0 | 0 | 0 | # | st  |
| 2096 | 25 | 5 | 2.100000  | 3.449029217  | 2.729580341   | -9.218820449  | 0 | 0 | 0 | # | st  |
| 2097 | 25 | 5 | 2.100000  | 4.372376051  | -2.638063392  | -16.155125016 | 0 | 0 | 0 | # | st  |
| 2098 | 25 | 5 | 2.100000  | 1.713733961  | -2.640760033  | -14.767921646 | 0 | 0 | 0 | # | st  |
| 2099 | 25 | 5 | 2.100000  | 4.286150250  | -2.631682580  | -10.540175727 | 0 | 0 | 0 | # | st  |

|      |    |   |           |              |              |               |   |   |   |   |     |
|------|----|---|-----------|--------------|--------------|---------------|---|---|---|---|-----|
| 2100 | 25 | 5 | 2.100000  | 3.378672668  | 2.723397425  | -12.059455955 | 0 | 0 | 0 | # | st  |
| 2101 | 25 | 5 | 2.100000  | 1.784418745  | -2.634695815 | -11.927421788 | 0 | 0 | 0 | # | st  |
| 2102 | 25 | 1 | 1.575000  | 2.564951898  | 0.057857326  | -2.106452507  | 0 | 0 | 0 | # | ao  |
| 2103 | 25 | 1 | 1.575000  | 5.152091886  | 0.047832665  | -6.329552507  | 0 | 0 | 0 | # | ao  |
| 2104 | 25 | 1 | 1.575000  | 0.010475843  | 0.041014554  | -0.757989037  | 0 | 0 | 0 | # | ao  |
| 2105 | 25 | 1 | 1.575000  | 2.597479300  | 0.031026926  | -4.981097695  | 0 | 0 | 0 | # | ao  |
| 2106 | 25 | 2 | 0.425000  | 3.116355855  | 1.425163371  | -6.987748987  | 0 | 0 | 0 | # | ho  |
| 2107 | 25 | 2 | 0.425000  | 0.545922528  | 1.523504153  | -2.718287538  | 0 | 0 | 0 | # | ho  |
| 2108 | 25 | 2 | 0.425000  | 4.617664323  | -1.430790090 | -4.366998978  | 0 | 0 | 0 | # | ho  |
| 2109 | 25 | 2 | 0.425000  | 2.046067415  | -1.336757339 | -0.100174810  | 0 | 0 | 0 | # | ho  |
| 2110 | 25 | 3 | -1.050000 | 1.974320767  | -1.017449350 | -3.540819251  | 0 | 0 | 0 | # | ob  |
| 2111 | 25 | 3 | -1.050000 | 1.589283948  | -1.009534011 | -6.225770135  | 0 | 0 | 0 | # | ob  |
| 2112 | 25 | 3 | -1.050000 | 4.162820410  | -1.002235530 | -1.992022885  | 0 | 0 | 0 | # | ob  |
| 2113 | 25 | 3 | -1.050000 | 2.219750450  | -3.254329459 | -4.913787416  | 0 | 0 | 0 | # | ob  |
| 2114 | 25 | 3 | -1.050000 | 4.804343942  | -3.253528090 | -0.694848299  | 0 | 0 | 0 | # | ob  |
| 2115 | 25 | 3 | -1.050000 | 0.606605783  | 1.108160884  | -7.769166009  | 0 | 0 | 0 | # | ob  |
| 2116 | 25 | 3 | -1.050000 | 3.188175495  | 1.106315515  | -3.546748257  | 0 | 0 | 0 | # | ob  |
| 2117 | 25 | 3 | -1.050000 | 2.355525134  | 3.339943172  | -4.722452555  | 0 | 0 | 0 | # | ob  |
| 2118 | 25 | 3 | -1.050000 | 4.928942666  | 3.343459909  | -0.494130207  | 0 | 0 | 0 | # | ob  |
| 2119 | 25 | 3 | -1.050000 | 0.358599510  | 3.342745271  | -6.392656438  | 0 | 0 | 0 | # | ob  |
| 2120 | 25 | 3 | -1.050000 | 2.943159518  | 3.343022387  | -2.173899070  | 0 | 0 | 0 | # | ob  |
| 2121 | 25 | 4 | -0.950000 | 0.973817447  | 1.030057382  | -1.993288188  | 0 | 0 | 0 | # | oh  |
| 2122 | 25 | 4 | -0.950000 | 3.559070440  | 1.017364731  | -6.220340000  | 0 | 0 | 0 | # | oh  |
| 2123 | 25 | 3 | -1.050000 | 2.368990946  | 3.066493209  | -8.032003882  | 0 | 0 | 0 | # | ob  |
| 2124 | 25 | 3 | -1.050000 | 4.963275993  | 3.050340270  | -3.800661108  | 0 | 0 | 0 | # | ob  |
| 2125 | 25 | 4 | -0.950000 | 1.603365723  | -0.928489933 | -0.867370730  | 0 | 0 | 0 | # | oh  |
| 2126 | 25 | 3 | -1.050000 | 0.199951485  | -2.961853389 | -3.286683302  | 0 | 0 | 0 | # | ob  |
| 2127 | 25 | 4 | -0.950000 | 4.188976468  | -0.940763219 | -5.093840393  | 0 | 0 | 0 | # | oh  |
| 2128 | 25 | 3 | -1.050000 | 2.793669734  | -2.977677046 | -7.505235566  | 0 | 0 | 0 | # | ob  |
| 2129 | 25 | 3 | -1.050000 | 0.999937272  | 1.091158613  | -5.095757722  | 0 | 0 | 0 | # | ob  |
| 2130 | 25 | 3 | -1.050000 | 3.573485134  | 1.098365238  | -0.861724339  | 0 | 0 | 0 | # | ob  |
| 2131 | 25 | 3 | -1.050000 | 4.555837623  | -1.019123292 | -7.767860028  | 0 | 0 | 0 | # | ob  |
| 2132 | 25 | 3 | -1.050000 | 0.233734585  | -3.254366293 | -6.593423632  | 0 | 0 | 0 | # | ob  |
| 2133 | 25 | 3 | -1.050000 | 2.807687271  | -3.251063569 | -2.365242275  | 0 | 0 | 0 | # | ob  |
| 2134 | 25 | 5 | 2.100000  | 0.877003477  | 2.720599038  | -4.997113478  | 0 | 0 | 0 | # | st  |
| 2135 | 25 | 5 | 2.100000  | 3.449029217  | 2.729580341  | -0.769220449  | 0 | 0 | 0 | # | st  |
| 2136 | 25 | 5 | 2.100000  | 4.372376051  | -2.638063392 | -7.705525016  | 0 | 0 | 0 | # | st  |
| 2137 | 25 | 5 | 2.100000  | 1.713733961  | -2.640760033 | -6.318321646  | 0 | 0 | 0 | # | st  |
| 2138 | 25 | 5 | 2.100000  | 4.286150250  | -2.631682580 | -2.090575727  | 0 | 0 | 0 | # | st  |
| 2139 | 25 | 5 | 2.100000  | 0.790278839  | 2.727049911  | -7.831638849  | 0 | 0 | 0 | # | st  |
| 2140 | 25 | 5 | 2.100000  | 3.378672668  | 2.723397425  | -3.609855955  | 0 | 0 | 0 | # | st  |
| 2141 | 25 | 5 | 2.100000  | 1.784418745  | -2.634695815 | -3.477821788  | 0 | 0 | 0 | # | st  |
| 2142 | 25 | 8 | -0.950000 | 0.590206465  | 2.961484659  | -15.319631379 | 0 | 0 | 0 | # | oht |
| 2143 | 25 | 6 | 0.425000  | 0.429963167  | 3.078655077  | -16.411736324 | 0 | 0 | 0 | # | do  |
| 2144 | 25 | 6 | 0.425000  | 5.010789943  | -2.983958974 | -18.650841835 | 0 | 0 | 0 | # | do  |
| 2145 | 26 | 8 | -0.950000 | 9.967143942  | -3.253528090 | -17.594048299 | 0 | 0 | 0 | # | oht |
| 2146 | 26 | 1 | 1.575000  | 7.727751898  | 0.057857326  | -10.556052507 | 0 | 0 | 0 | # | ao  |
| 2147 | 26 | 1 | 1.575000  | 10.314891886 | 0.047832665  | -14.779152507 | 0 | 0 | 0 | # | ao  |
| 2148 | 26 | 1 | 1.575000  | 5.173275843  | 0.041014554  | -9.207589037  | 0 | 0 | 0 | # | ao  |
| 2149 | 26 | 1 | 1.575000  | 7.760279300  | 0.031026926  | -13.430697695 | 0 | 0 | 0 | # | ao  |
| 2150 | 26 | 6 | 0.425000  | 8.279155855  | 1.425163371  | -15.437348987 | 0 | 0 | 0 | # | do  |
| 2151 | 26 | 2 | 0.425000  | 5.708722528  | 1.523504153  | -11.167887538 | 0 | 0 | 0 | # | ho  |
| 2152 | 26 | 2 | 0.425000  | 9.780464323  | -1.430790090 | -12.816598978 | 0 | 0 | 0 | # | ho  |
| 2153 | 26 | 2 | 0.425000  | 7.208867415  | -1.336757339 | -8.549774810  | 0 | 0 | 0 | # | ho  |
| 2154 | 26 | 3 | -1.050000 | 7.137120767  | -1.017449350 | -11.990419251 | 0 | 0 | 0 | # | ob  |
| 2155 | 26 | 3 | -1.050000 | 6.752083948  | -1.009534011 | -14.675370135 | 0 | 0 | 0 | # | ob  |
| 2156 | 26 | 3 | -1.050000 | 9.325620410  | -1.002235530 | -10.441622885 | 0 | 0 | 0 | # | ob  |
| 2157 | 26 | 3 | -1.050000 | 7.382550450  | -3.254329459 | -13.363387416 | 0 | 0 | 0 | # | ob  |
| 2158 | 26 | 3 | -1.050000 | 9.967143942  | -3.253528090 | -9.144448299  | 0 | 0 | 0 | # | ob  |
| 2159 | 26 | 3 | -1.050000 | 8.350975495  | 1.106315515  | -11.996348257 | 0 | 0 | 0 | # | ob  |
| 2160 | 26 | 3 | -1.050000 | 7.518325134  | 3.339943172  | -13.172052555 | 0 | 0 | 0 | # | ob  |
| 2161 | 26 | 3 | -1.050000 | 10.091742666 | 3.343459909  | -8.943730207  | 0 | 0 | 0 | # | ob  |
| 2162 | 26 | 3 | -1.050000 | 8.105959518  | 3.343022387  | -10.623499070 | 0 | 0 | 0 | # | ob  |
| 2163 | 26 | 4 | -0.950000 | 6.136617447  | 1.030057382  | -10.442888188 | 0 | 0 | 0 | # | oh  |
| 2164 | 26 | 7 | -0.950000 | 8.721870440  | 1.017364731  | -14.669940000 | 0 | 0 | 0 | # | oho |
| 2165 | 26 | 3 | -1.050000 | 10.126075993 | 3.050340270  | -12.250261108 | 0 | 0 | 0 | # | ob  |
| 2166 | 26 | 4 | -0.950000 | 6.766165723  | -0.928489933 | -9.316970730  | 0 | 0 | 0 | # | oh  |
| 2167 | 26 | 3 | -1.050000 | 5.362751485  | -2.961853389 | -11.736283302 | 0 | 0 | 0 | # | ob  |
| 2168 | 26 | 4 | -0.950000 | 9.351776468  | -0.940763219 | -13.543440393 | 0 | 0 | 0 | # | oh  |
| 2169 | 26 | 3 | -1.050000 | 7.956469734  | -2.977677046 | -15.954835566 | 0 | 0 | 0 | # | ob  |
| 2170 | 26 | 3 | -1.050000 | 6.162737272  | 1.091158613  | -13.545357722 | 0 | 0 | 0 | # | ob  |
| 2171 | 26 | 3 | -1.050000 | 8.736285134  | 1.098365238  | -9.311324339  | 0 | 0 | 0 | # | ob  |
| 2172 | 26 | 3 | -1.050000 | 9.718637623  | -1.019123292 | -16.217460028 | 0 | 0 | 0 | # | ob  |
| 2173 | 26 | 3 | -1.050000 | 5.396534585  | -3.254366293 | -15.043023632 | 0 | 0 | 0 | # | ob  |
| 2174 | 26 | 3 | -1.050000 | 7.970487271  | -3.251063569 | -10.814842275 | 0 | 0 | 0 | # | ob  |
| 2175 | 26 | 5 | 2.100000  | 6.039803477  | 2.720599038  | -13.446713478 | 0 | 0 | 0 | # | st  |
| 2176 | 26 | 5 | 2.100000  | 8.611829217  | 2.729580341  | -9.218820449  | 0 | 0 | 0 | # | st  |
| 2177 | 26 | 5 | 2.100000  | 9.535176051  | -2.638063392 | -16.155125016 | 0 | 0 | 0 | # | st  |
| 2178 | 26 | 5 | 2.100000  | 6.876533961  | -2.640760033 | -14.767921646 | 0 | 0 | 0 | # | st  |
| 2179 | 26 | 5 | 2.100000  | 9.448950250  | -2.631682580 | -10.540175727 | 0 | 0 | 0 | # | st  |
| 2180 | 26 | 5 | 2.100000  | 8.541472668  | 2.723397425  | -12.059455955 | 0 | 0 | 0 | # | st  |
| 2181 | 26 | 5 | 2.100000  | 6.947218745  | -2.634695815 | -11.927421788 | 0 | 0 | 0 | # | st  |
| 2182 | 26 | 1 | 1.575000  | 7.727751898  | 0.057857326  | -2.106452507  | 0 | 0 | 0 | # | ao  |
| 2183 | 26 | 1 | 1.575000  | 10.314891886 | 0.047832665  | -6.329552507  | 0 | 0 | 0 | # | ao  |
| 2184 | 26 | 1 | 1.575000  | 5.173275843  | 0.041014554  | -0.757989037  | 0 | 0 | 0 | # | ao  |
| 2185 | 26 | 1 | 1.575000  | 7.760279300  | 0.031026926  | -4.981097695  | 0 | 0 | 0 | # | ao  |
| 2186 | 26 | 2 | 0.425000  | 8.279155855  | 1.425163371  | -6.987748987  | 0 | 0 | 0 | # | ho  |
| 2187 | 26 | 2 | 0.425000  | 5.708722528  | 1.523504153  | -2.718287538  | 0 | 0 | 0 | # | ho  |
| 2188 | 26 | 2 | 0.425000  | 9.780464323  | -1.430790090 | -4.366998978  | 0 | 0 | 0 | # | ho  |
| 2189 | 26 | 2 | 0.425000  | 7.208867415  | -1.336757339 | -0.100174810  | 0 | 0 | 0 | # | ho  |
| 2190 | 26 | 3 | -1.050000 | 7.137120767  | -1.017449350 | -3.540819251  | 0 | 0 | 0 | # | ob  |
| 2191 | 26 | 3 | -1.050000 | 6.752083948  | -1.009534011 | -6.225770135  | 0 | 0 | 0 | # | ob  |
| 2192 | 26 | 3 | -1.050000 | 9.325620410  | -1.002235530 | -1.992022885  | 0 | 0 | 0 | # | ob  |

|      |    |   |           |              |              |               |   |   |   |     |
|------|----|---|-----------|--------------|--------------|---------------|---|---|---|-----|
| 2193 | 26 | 3 | -1.050000 | 7.382550450  | -3.254329459 | -4.913787416  | 0 | 0 | 0 | ob  |
| 2194 | 26 | 3 | -1.050000 | 9.967143942  | -3.253528090 | -0.694848299  | 0 | 0 | 0 | ob  |
| 2195 | 26 | 3 | -1.050000 | 5.769405783  | 1.108160884  | -7.769166009  | 0 | 0 | 0 | ob  |
| 2196 | 26 | 3 | -1.050000 | 8.350975495  | 1.106315515  | -3.546748257  | 0 | 0 | 0 | ob  |
| 2197 | 26 | 3 | -1.050000 | 7.518325134  | 3.339943172  | -4.722452555  | 0 | 0 | 0 | ob  |
| 2198 | 26 | 3 | -1.050000 | 10.091742666 | 3.343459909  | -0.494130207  | 0 | 0 | 0 | ob  |
| 2199 | 26 | 3 | -1.050000 | 5.521399510  | 3.342745271  | -6.392656438  | 0 | 0 | 0 | ob  |
| 2200 | 26 | 3 | -1.050000 | 8.105959518  | 3.343022387  | -2.173899070  | 0 | 0 | 0 | ob  |
| 2201 | 26 | 4 | -0.950000 | 6.136617447  | 1.030057382  | -1.993288188  | 0 | 0 | 0 | oh  |
| 2202 | 26 | 4 | -0.950000 | 8.721870440  | 1.017364731  | -6.220340000  | 0 | 0 | 0 | oh  |
| 2203 | 26 | 3 | -1.050000 | 7.531790946  | 3.066493209  | -8.032003882  | 0 | 0 | 0 | ob  |
| 2204 | 26 | 3 | -1.050000 | 10.126075993 | 3.050340270  | -3.800661108  | 0 | 0 | 0 | ob  |
| 2205 | 26 | 4 | -0.950000 | 6.766165723  | -0.928489933 | -0.867370730  | 0 | 0 | 0 | oh  |
| 2206 | 26 | 3 | -1.050000 | 5.362751485  | -2.961853389 | -3.286683302  | 0 | 0 | 0 | ob  |
| 2207 | 26 | 4 | -0.950000 | 9.351776468  | -0.940763219 | -5.093840393  | 0 | 0 | 0 | oh  |
| 2208 | 26 | 3 | -1.050000 | 7.956469734  | -2.977677046 | -7.505235566  | 0 | 0 | 0 | ob  |
| 2209 | 26 | 3 | -1.050000 | 6.162737272  | 1.091158613  | -5.095757722  | 0 | 0 | 0 | ob  |
| 2210 | 26 | 3 | -1.050000 | 8.736285134  | 1.098365238  | -0.861724339  | 0 | 0 | 0 | ob  |
| 2211 | 26 | 3 | -1.050000 | 9.718637623  | -1.019123292 | -7.767860028  | 0 | 0 | 0 | ob  |
| 2212 | 26 | 3 | -1.050000 | 5.396534585  | -3.254366293 | -6.593423632  | 0 | 0 | 0 | ob  |
| 2213 | 26 | 3 | -1.050000 | 7.970487271  | -3.251063569 | -2.365242275  | 0 | 0 | 0 | ob  |
| 2214 | 26 | 5 | 2.100000  | 6.039803477  | 2.720599038  | -4.997113478  | 0 | 0 | 0 | st  |
| 2215 | 26 | 5 | 2.100000  | 8.611829217  | 2.729580341  | -0.769220449  | 0 | 0 | 0 | st  |
| 2216 | 26 | 5 | 2.100000  | 9.535176051  | -2.638063392 | -7.705525016  | 0 | 0 | 0 | st  |
| 2217 | 26 | 5 | 2.100000  | 6.876533961  | -2.640760033 | -6.318321646  | 0 | 0 | 0 | st  |
| 2218 | 26 | 5 | 2.100000  | 9.448950250  | -2.631682580 | -2.090575727  | 0 | 0 | 0 | st  |
| 2219 | 26 | 5 | 2.100000  | 5.953078839  | 2.727049911  | -7.831638849  | 0 | 0 | 0 | st  |
| 2220 | 26 | 5 | 2.100000  | 8.541472668  | 2.723397425  | -3.609855955  | 0 | 0 | 0 | st  |
| 2221 | 26 | 5 | 2.100000  | 6.947218745  | -2.634695815 | -3.477821788  | 0 | 0 | 0 | st  |
| 2222 | 26 | 8 | -0.950000 | 5.753006465  | 2.961484659  | -15.319631379 | 0 | 0 | 0 | oht |
| 2223 | 26 | 6 | 0.425000  | 5.592763167  | 3.078655077  | -16.411736324 | 0 | 0 | 0 | do  |
| 2224 | 26 | 6 | 0.425000  | 10.173589943 | -2.983958974 | -18.650841835 | 0 | 0 | 0 | do  |
| 2225 | 27 | 8 | -0.950000 | 15.129943942 | -3.253528090 | -17.594048299 | 0 | 0 | 0 | oht |
| 2226 | 27 | 1 | 1.575000  | 12.890551898 | 0.057857326  | -10.556052507 | 0 | 0 | 0 | ao  |
| 2227 | 27 | 1 | 1.575000  | 15.477691886 | 0.047832665  | -14.779152507 | 0 | 0 | 0 | ao  |
| 2228 | 27 | 1 | 1.575000  | 10.336075843 | 0.041014554  | -9.207589037  | 0 | 0 | 0 | ao  |
| 2229 | 27 | 1 | 1.575000  | 12.923079300 | 0.031026926  | -13.430697695 | 0 | 0 | 0 | ao  |
| 2230 | 27 | 6 | 0.425000  | 13.441955855 | 1.425163371  | -15.437348987 | 0 | 0 | 0 | do  |
| 2231 | 27 | 2 | 0.425000  | 10.871522528 | 1.523504153  | -11.167887538 | 0 | 0 | 0 | ho  |
| 2232 | 27 | 2 | 0.425000  | 14.943264323 | -1.430790090 | -12.816598978 | 0 | 0 | 0 | ho  |
| 2233 | 27 | 2 | 0.425000  | 12.371667415 | -1.336757339 | -8.549774810  | 0 | 0 | 0 | ho  |
| 2234 | 27 | 3 | -1.050000 | 12.299920767 | -1.017449350 | -11.990419251 | 0 | 0 | 0 | ob  |
| 2235 | 27 | 3 | -1.050000 | 11.914883948 | -1.009534011 | -14.675370135 | 0 | 0 | 0 | ob  |
| 2236 | 27 | 3 | -1.050000 | 14.488420410 | -1.002235530 | -10.441622885 | 0 | 0 | 0 | ob  |
| 2237 | 27 | 3 | -1.050000 | 12.545350450 | -3.254329459 | -13.363387416 | 0 | 0 | 0 | ob  |
| 2238 | 27 | 3 | -1.050000 | 15.129943942 | -3.253528090 | -9.144448299  | 0 | 0 | 0 | ob  |
| 2239 | 27 | 3 | -1.050000 | 13.513775495 | 1.106315515  | -11.996348257 | 0 | 0 | 0 | ob  |
| 2240 | 27 | 3 | -1.050000 | 12.681125134 | 3.339943172  | -13.172052555 | 0 | 0 | 0 | ob  |
| 2241 | 27 | 3 | -1.050000 | 15.254542666 | 3.343459909  | -8.943730207  | 0 | 0 | 0 | ob  |
| 2242 | 27 | 3 | -1.050000 | 13.268759518 | 3.343022387  | -10.623499070 | 0 | 0 | 0 | ob  |
| 2243 | 27 | 4 | -0.950000 | 11.299417447 | 1.030057382  | -10.442888188 | 0 | 0 | 0 | oh  |
| 2244 | 27 | 7 | -0.950000 | 13.884670440 | 1.017364731  | -14.669940000 | 0 | 0 | 0 | oho |
| 2245 | 27 | 3 | -1.050000 | 15.288875993 | 3.050340270  | -12.250261108 | 0 | 0 | 0 | ob  |
| 2246 | 27 | 4 | -0.950000 | 11.928965723 | -0.928489933 | -9.316970730  | 0 | 0 | 0 | oh  |
| 2247 | 27 | 3 | -1.050000 | 10.525551485 | -2.961853389 | -11.736283302 | 0 | 0 | 0 | ob  |
| 2248 | 27 | 4 | -0.950000 | 14.514576468 | -0.940763219 | -13.543440393 | 0 | 0 | 0 | oh  |
| 2249 | 27 | 3 | -1.050000 | 13.119269734 | -2.977677046 | -15.954835566 | 0 | 0 | 0 | ob  |
| 2250 | 27 | 3 | -1.050000 | 11.325537272 | 1.091158613  | -13.545357722 | 0 | 0 | 0 | ob  |
| 2251 | 27 | 3 | -1.050000 | 13.899085134 | 1.098365238  | -9.311324339  | 0 | 0 | 0 | ob  |
| 2252 | 27 | 3 | -1.050000 | 14.881437623 | -1.019123292 | -16.217460028 | 0 | 0 | 0 | ob  |
| 2253 | 27 | 3 | -1.050000 | 10.559334585 | -3.254366293 | -15.043023632 | 0 | 0 | 0 | ob  |
| 2254 | 27 | 3 | -1.050000 | 13.133287271 | -3.251063569 | -10.814842275 | 0 | 0 | 0 | ob  |
| 2255 | 27 | 5 | 2.100000  | 11.202603477 | 2.720599038  | -13.446713478 | 0 | 0 | 0 | st  |
| 2256 | 27 | 5 | 2.100000  | 13.774629217 | 2.729580341  | -9.218820449  | 0 | 0 | 0 | st  |
| 2257 | 27 | 5 | 2.100000  | 14.679776051 | -2.638063392 | -16.155125016 | 0 | 0 | 0 | st  |
| 2258 | 27 | 5 | 2.100000  | 12.039333961 | -2.640760033 | -14.767921646 | 0 | 0 | 0 | st  |
| 2259 | 27 | 5 | 2.100000  | 14.611750250 | -2.631682580 | -10.540175727 | 0 | 0 | 0 | st  |
| 2260 | 27 | 5 | 2.100000  | 13.704272668 | 2.723397425  | -12.059455955 | 0 | 0 | 0 | st  |
| 2261 | 27 | 5 | 2.100000  | 12.110018745 | -2.634695815 | -11.927421788 | 0 | 0 | 0 | st  |
| 2262 | 27 | 1 | 1.575000  | 12.890551898 | 0.057857326  | -2.106452507  | 0 | 0 | 0 | ao  |
| 2263 | 27 | 1 | 1.575000  | 15.477691886 | 0.047832665  | -6.329552507  | 0 | 0 | 0 | ao  |
| 2264 | 27 | 1 | 1.575000  | 10.336075843 | 0.041014554  | -0.757989037  | 0 | 0 | 0 | ao  |
| 2265 | 27 | 1 | 1.575000  | 12.923079300 | 0.031026926  | -4.981097695  | 0 | 0 | 0 | ao  |
| 2266 | 27 | 2 | 0.425000  | 13.441955855 | 1.425163371  | -6.987748987  | 0 | 0 | 0 | ho  |
| 2267 | 27 | 2 | 0.425000  | 10.871522528 | 1.523504153  | -2.718287538  | 0 | 0 | 0 | ho  |
| 2268 | 27 | 2 | 0.425000  | 14.943264323 | -1.430790090 | -4.366998978  | 0 | 0 | 0 | ho  |
| 2269 | 27 | 2 | 0.425000  | 12.371667415 | -1.336757339 | -0.100174810  | 0 | 0 | 0 | ho  |
| 2270 | 27 | 3 | -1.050000 | 12.299920767 | -1.017449350 | -3.540819251  | 0 | 0 | 0 | ob  |
| 2271 | 27 | 3 | -1.050000 | 11.914883948 | -1.009534011 | -6.225770135  | 0 | 0 | 0 | ob  |
| 2272 | 27 | 3 | -1.050000 | 14.488420410 | -1.002235530 | -1.992022885  | 0 | 0 | 0 | ob  |
| 2273 | 27 | 3 | -1.050000 | 12.545350450 | -3.254329459 | -4.913787416  | 0 | 0 | 0 | ob  |
| 2274 | 27 | 3 | -1.050000 | 15.129943942 | -3.253528090 | -0.694848299  | 0 | 0 | 0 | ob  |
| 2275 | 27 | 3 | -1.050000 | 10.932205783 | 1.108160884  | -7.769166009  | 0 | 0 | 0 | ob  |
| 2276 | 27 | 3 | -1.050000 | 13.513775495 | 1.106315515  | -3.546748257  | 0 | 0 | 0 | ob  |
| 2277 | 27 | 3 | -1.050000 | 12.681125134 | 3.339943172  | -4.722452555  | 0 | 0 | 0 | ob  |
| 2278 | 27 | 3 | -1.050000 | 15.254542666 | 3.343459909  | -0.494130207  | 0 | 0 | 0 | ob  |
| 2279 | 27 | 3 | -1.050000 | 10.684199510 | 3.342745271  | -6.392656438  | 0 | 0 | 0 | ob  |
| 2280 | 27 | 3 | -1.050000 | 13.268759518 | 3.343022387  | -2.173899070  | 0 | 0 | 0 | ob  |
| 2281 | 27 | 4 | -0.950000 | 11.299417447 | 1.030057382  | -1.993288188  | 0 | 0 | 0 | oh  |
| 2282 | 27 | 4 | -0.950000 | 13.884670440 | 1.017364731  | -6.220340000  | 0 | 0 | 0 | oh  |
| 2283 | 27 | 3 | -1.050000 | 12.694590946 | 3.066493209  | -8.032003882  | 0 | 0 | 0 | ob  |
| 2284 | 27 | 3 | -1.050000 | 15.288875993 | 3.050340270  | -3.800661108  | 0 | 0 | 0 | ob  |
| 2285 | 27 | 4 | -0.950000 | 11.928965723 | -0.928489933 | -0.867370730  | 0 | 0 | 0 | oh  |

|      |    |   |           |               |              |               |   |   |   |   |     |
|------|----|---|-----------|---------------|--------------|---------------|---|---|---|---|-----|
| 2286 | 27 | 3 | -1.050000 | 10.525551485  | -2.961853389 | -3.286683302  | 0 | 0 | 0 | # | ob  |
| 2287 | 27 | 4 | -0.950000 | 14.514576468  | -0.940763219 | -5.093840393  | 0 | 0 | 0 | # | oh  |
| 2288 | 27 | 3 | -1.050000 | 13.119269734  | -2.977677046 | -7.505235566  | 0 | 0 | 0 | # | ob  |
| 2289 | 27 | 3 | -1.050000 | 11.325537272  | 1.091158613  | -5.095757722  | 0 | 0 | 0 | # | ob  |
| 2290 | 27 | 3 | -1.050000 | 13.899085134  | 1.098365238  | -0.861724339  | 0 | 0 | 0 | # | ob  |
| 2291 | 27 | 3 | -1.050000 | 14.881437623  | -1.019123292 | -7.767860028  | 0 | 0 | 0 | # | ob  |
| 2292 | 27 | 3 | -1.050000 | 10.559334585  | -3.254366293 | -6.593423632  | 0 | 0 | 0 | # | ob  |
| 2293 | 27 | 3 | -1.050000 | 13.133287271  | -3.251063569 | -2.365242275  | 0 | 0 | 0 | # | ob  |
| 2294 | 27 | 5 | 2.100000  | 11.202603477  | 2.720599038  | -4.997113478  | 0 | 0 | 0 | # | st  |
| 2295 | 27 | 5 | 2.100000  | 13.774629217  | 2.729580341  | -0.769220449  | 0 | 0 | 0 | # | st  |
| 2296 | 27 | 5 | 2.100000  | 14.697976051  | -2.638063392 | -7.705525016  | 0 | 0 | 0 | # | st  |
| 2297 | 27 | 5 | 2.100000  | 12.039333961  | -2.640760033 | -6.318321646  | 0 | 0 | 0 | # | st  |
| 2298 | 27 | 5 | 2.100000  | 14.611750250  | -2.631682580 | -2.090575727  | 0 | 0 | 0 | # | st  |
| 2299 | 27 | 5 | 2.100000  | 11.115878839  | 2.727049911  | -7.831638849  | 0 | 0 | 0 | # | st  |
| 2300 | 27 | 5 | 2.100000  | 13.704272668  | 2.723397425  | -3.609855955  | 0 | 0 | 0 | # | st  |
| 2301 | 27 | 5 | 2.100000  | 12.110018745  | -2.634695815 | -3.477821788  | 0 | 0 | 0 | # | st  |
| 2302 | 27 | 8 | -0.950000 | 10.915806465  | 2.961484659  | -15.319631379 | 0 | 0 | 0 | # | oht |
| 2303 | 27 | 6 | 0.425000  | 10.755563167  | 3.078655077  | -16.411736324 | 0 | 0 | 0 | # | do  |
| 2304 | 27 | 6 | 0.425000  | 15.336389943  | -2.983958974 | -18.650841835 | 0 | 0 | 0 | # | do  |
| 2305 | 28 | 8 | -0.950000 | -10.684056058 | -3.253528090 | -17.594048299 | 1 | 0 | 0 | # | oht |
| 2306 | 28 | 1 | 1.575000  | -12.923448102 | 0.057857326  | -10.556052507 | 1 | 0 | 0 | # | ao  |
| 2307 | 28 | 1 | 1.575000  | -10.336308114 | 0.047832665  | -14.779152507 | 1 | 0 | 0 | # | ao  |
| 2308 | 28 | 1 | 1.575000  | -15.477924157 | 0.041014554  | -9.207589037  | 1 | 0 | 0 | # | ao  |
| 2309 | 28 | 1 | 1.575000  | -12.890920700 | 0.031026926  | -13.430697695 | 1 | 0 | 0 | # | ao  |
| 2310 | 28 | 6 | 0.425000  | -12.372044145 | 1.425163371  | -15.437348987 | 1 | 0 | 0 | # | do  |
| 2311 | 28 | 2 | 0.425000  | -14.942477472 | 1.523504153  | -11.167887538 | 1 | 0 | 0 | # | ho  |
| 2312 | 28 | 2 | 0.425000  | -10.870735677 | -1.430790090 | -12.816598978 | 1 | 0 | 0 | # | ho  |
| 2313 | 28 | 2 | 0.425000  | -13.442332585 | -1.336757339 | -8.549774810  | 1 | 0 | 0 | # | ho  |
| 2314 | 28 | 3 | -1.050000 | -13.514072923 | -1.017449350 | -11.990419251 | 1 | 0 | 0 | # | ob  |
| 2315 | 28 | 3 | -1.050000 | -13.899116052 | -1.009534011 | -14.675370135 | 1 | 0 | 0 | # | ob  |
| 2316 | 28 | 3 | -1.050000 | -11.325579590 | -1.002235530 | -10.441622885 | 1 | 0 | 0 | # | ob  |
| 2317 | 28 | 3 | -1.050000 | -13.268649550 | -3.254329459 | -13.363387416 | 1 | 0 | 0 | # | ob  |
| 2318 | 28 | 3 | -1.050000 | -10.684056058 | -3.253528090 | -9.144448299  | 1 | 0 | 0 | # | ob  |
| 2319 | 28 | 3 | -1.050000 | -12.300224505 | 1.106315515  | -11.996348257 | 1 | 0 | 0 | # | ob  |
| 2320 | 28 | 3 | -1.050000 | -13.132874866 | 3.339943172  | -13.172052555 | 1 | 0 | 0 | # | ob  |
| 2321 | 28 | 3 | -1.050000 | -10.559457334 | 3.343459909  | -8.943730207  | 1 | 0 | 0 | # | ob  |
| 2322 | 28 | 3 | -1.050000 | -12.545240482 | 3.343022387  | -10.623499070 | 1 | 0 | 0 | # | ob  |
| 2323 | 28 | 4 | -0.950000 | -14.514582553 | 1.030057382  | -10.442888188 | 1 | 0 | 0 | # | oh  |
| 2324 | 28 | 7 | -0.950000 | -11.929329560 | 1.017364731  | -14.669940000 | 1 | 0 | 0 | # | oho |
| 2325 | 28 | 3 | -1.050000 | -10.525124007 | 3.050340270  | -12.250261108 | 1 | 0 | 0 | # | ob  |
| 2326 | 28 | 4 | -0.950000 | -13.885034277 | -0.928489933 | -9.316970730  | 1 | 0 | 0 | # | oh  |
| 2327 | 28 | 3 | -1.050000 | -15.288448515 | -2.961853389 | -11.736283302 | 1 | 0 | 0 | # | ob  |
| 2328 | 28 | 4 | -0.950000 | -11.299423532 | -0.940763219 | -13.543440393 | 1 | 0 | 0 | # | oh  |
| 2329 | 28 | 3 | -1.050000 | -12.694730266 | -2.977677046 | -15.954835566 | 1 | 0 | 0 | # | ob  |
| 2330 | 28 | 3 | -1.050000 | -14.488462728 | 1.091158613  | -13.545357722 | 1 | 0 | 0 | # | ob  |
| 2331 | 28 | 3 | -1.050000 | -11.914914866 | 1.098365238  | -9.311324339  | 1 | 0 | 0 | # | ob  |
| 2332 | 28 | 3 | -1.050000 | -10.932562377 | -1.019123292 | -16.217460028 | 1 | 0 | 0 | # | ob  |
| 2333 | 28 | 3 | -1.050000 | -15.254665415 | -3.254366293 | -15.043023632 | 1 | 0 | 0 | # | ob  |
| 2334 | 28 | 3 | -1.050000 | -12.680712729 | -3.251063569 | -10.814842275 | 1 | 0 | 0 | # | ob  |
| 2335 | 28 | 5 | 2.100000  | -14.611396523 | 2.720599038  | -13.446713478 | 1 | 0 | 0 | # | st  |
| 2336 | 28 | 5 | 2.100000  | -12.039370783 | 2.729580341  | -9.218820449  | 1 | 0 | 0 | # | st  |
| 2337 | 28 | 5 | 2.100000  | -11.116023949 | -2.638063392 | -16.155125016 | 1 | 0 | 0 | # | st  |
| 2338 | 28 | 5 | 2.100000  | -13.774666039 | -2.640760033 | -14.767921646 | 1 | 0 | 0 | # | st  |
| 2339 | 28 | 5 | 2.100000  | -11.202249750 | -2.631682580 | -10.540175727 | 1 | 0 | 0 | # | st  |
| 2340 | 28 | 5 | 2.100000  | -12.109727332 | 2.723397425  | -12.059455955 | 1 | 0 | 0 | # | st  |
| 2341 | 28 | 5 | 2.100000  | -13.703981255 | -2.634695815 | -11.927421788 | 1 | 0 | 0 | # | st  |
| 2342 | 28 | 1 | 1.575000  | -12.923448102 | 0.057857326  | -2.106452507  | 1 | 0 | 0 | # | ao  |
| 2343 | 28 | 1 | 1.575000  | -10.336308114 | 0.047832665  | -6.329552507  | 1 | 0 | 0 | # | ao  |
| 2344 | 28 | 1 | 1.575000  | -15.477924157 | 0.041014554  | -0.757989037  | 1 | 0 | 0 | # | ao  |
| 2345 | 28 | 1 | 1.575000  | -12.890920700 | 0.031026926  | -4.981097695  | 1 | 0 | 0 | # | ao  |
| 2346 | 28 | 2 | 0.425000  | -12.372044145 | 1.425163371  | -6.987748987  | 1 | 0 | 0 | # | ho  |
| 2347 | 28 | 2 | 0.425000  | -14.942477472 | 1.523504153  | -2.718287538  | 1 | 0 | 0 | # | ho  |
| 2348 | 28 | 2 | 0.425000  | -10.870735677 | -1.430790090 | -4.366989878  | 1 | 0 | 0 | # | ho  |
| 2349 | 28 | 2 | 0.425000  | -13.442332585 | -1.336757339 | -0.100174810  | 1 | 0 | 0 | # | ho  |
| 2350 | 28 | 3 | -1.050000 | -13.514072923 | -1.017449350 | -3.540819251  | 1 | 0 | 0 | # | ob  |
| 2351 | 28 | 3 | -1.050000 | -13.899116052 | -1.009534011 | -6.225770135  | 1 | 0 | 0 | # | ob  |
| 2352 | 28 | 3 | -1.050000 | -11.325579590 | -1.002235530 | -1.992022885  | 1 | 0 | 0 | # | ob  |
| 2353 | 28 | 3 | -1.050000 | -13.268649550 | -3.254329459 | -4.913787416  | 1 | 0 | 0 | # | ob  |
| 2354 | 28 | 3 | -1.050000 | -10.684056058 | -3.253528090 | -0.694848299  | 1 | 0 | 0 | # | ob  |
| 2355 | 28 | 3 | -1.050000 | -14.881794217 | 1.108160884  | -7.769166009  | 1 | 0 | 0 | # | ob  |
| 2356 | 28 | 3 | -1.050000 | -12.300224505 | 1.106315515  | -3.546748257  | 1 | 0 | 0 | # | ob  |
| 2357 | 28 | 3 | -1.050000 | -13.132874866 | 3.339943172  | -4.722452555  | 1 | 0 | 0 | # | ob  |
| 2358 | 28 | 3 | -1.050000 | -10.559457334 | 3.343459909  | -0.494130207  | 1 | 0 | 0 | # | ob  |
| 2359 | 28 | 3 | -1.050000 | -15.129800490 | 3.342745271  | -6.392656438  | 1 | 0 | 0 | # | ob  |
| 2360 | 28 | 3 | -1.050000 | -12.545240482 | 3.343022387  | -2.173899070  | 1 | 0 | 0 | # | ob  |
| 2361 | 28 | 4 | -0.950000 | -14.514582553 | 1.030057382  | -1.993288188  | 1 | 0 | 0 | # | oh  |
| 2362 | 28 | 4 | -0.950000 | -11.929329560 | 1.017364731  | -6.220340000  | 1 | 0 | 0 | # | oh  |
| 2363 | 28 | 3 | -1.050000 | -13.119409054 | 3.066493209  | -8.032003882  | 1 | 0 | 0 | # | ob  |
| 2364 | 28 | 3 | -1.050000 | -10.525124007 | 3.050340270  | -3.800661108  | 1 | 0 | 0 | # | ob  |
| 2365 | 28 | 4 | -0.950000 | -13.885034277 | -0.928489933 | -0.867370730  | 1 | 0 | 0 | # | oh  |
| 2366 | 28 | 3 | -1.050000 | -15.288448515 | -2.961853389 | -3.286683302  | 1 | 0 | 0 | # | ob  |
| 2367 | 28 | 4 | -0.950000 | -11.299423532 | -0.940763219 | -5.093840393  | 1 | 0 | 0 | # | oh  |
| 2368 | 28 | 3 | -1.050000 | -12.694730266 | -2.977677046 | -7.505235566  | 1 | 0 | 0 | # | ob  |
| 2369 | 28 | 3 | -1.050000 | -14.488462728 | 1.091158613  | -5.095757722  | 1 | 0 | 0 | # | ob  |
| 2370 | 28 | 3 | -1.050000 | -11.914914866 | 1.098365238  | -0.861724339  | 1 | 0 | 0 | # | ob  |
| 2371 | 28 | 3 | -1.050000 | -10.932562377 | -1.019123292 | -7.767860028  | 1 | 0 | 0 | # | ob  |
| 2372 | 28 | 3 | -1.050000 | -15.254665415 | -3.254366293 | -6.593423632  | 1 | 0 | 0 | # | ob  |
| 2373 | 28 | 3 | -1.050000 | -12.680712729 | -3.251063569 | -2.365242275  | 1 | 0 | 0 | # | ob  |
| 2374 | 28 | 5 | 2.100000  | -14.611396523 | 2.720599038  | -4.997113478  | 1 | 0 | 0 | # | st  |
| 2375 | 28 | 5 | 2.100000  | -12.039370783 | 2.729580341  | -0.769220449  | 1 | 0 | 0 | # | st  |
| 2376 | 28 | 5 | 2.100000  | -11.116023949 | -2.638063392 | -7.705525016  | 1 | 0 | 0 | # | st  |
| 2377 | 28 | 5 | 2.100000  | -13.774666039 | -2.640760033 | -6.318321646  | 1 | 0 | 0 | # | st  |
| 2378 | 28 | 5 | 2.100000  | -11.202249750 | -2.631682580 | -2.090575727  | 1 | 0 | 0 | # | st  |



|      |    |   |           |               |              |               |   |   |   |   |     |
|------|----|---|-----------|---------------|--------------|---------------|---|---|---|---|-----|
| 2379 | 28 | 5 | 2.100000  | -14.698121161 | 2.727049911  | -7.831638849  | 1 | 0 | 0 | # | st  |
| 2380 | 28 | 5 | 2.100000  | -12.109727332 | 2.723397425  | -3.609855955  | 1 | 0 | 0 | # | st  |
| 2381 | 28 | 5 | 2.100000  | -13.703981255 | -2.634695815 | -3.477821788  | 1 | 0 | 0 | # | st  |
| 2382 | 28 | 8 | -0.950000 | -14.898193535 | 2.961484659  | -15.319631379 | 1 | 0 | 0 | # | oht |
| 2383 | 28 | 6 | 0.425000  | -15.058436833 | 3.078655077  | -16.411736324 | 1 | 0 | 0 | # | do  |
| 2384 | 28 | 6 | 0.425000  | -10.477610057 | -2.983958974 | -18.650841835 | 1 | 0 | 0 | # | do  |
| 2385 | 29 | 8 | -0.950000 | -5.521256058  | -3.253528090 | -17.594048299 | 1 | 0 | 0 | # | oht |
| 2386 | 29 | 1 | 1.575000  | -7.760648102  | 0.057857326  | -10.556052507 | 1 | 0 | 0 | # | ao  |
| 2387 | 29 | 1 | 1.575000  | -5.173508114  | 0.047832665  | -14.779152507 | 1 | 0 | 0 | # | ao  |
| 2388 | 29 | 1 | 1.575000  | -10.315124157 | 0.041014554  | -9.207589037  | 1 | 0 | 0 | # | ao  |
| 2389 | 29 | 1 | 1.575000  | -7.728120700  | 0.031026926  | -13.430697695 | 1 | 0 | 0 | # | ao  |
| 2390 | 29 | 6 | 0.425000  | -7.209244145  | 1.425163371  | -15.437348987 | 1 | 0 | 0 | # | do  |
| 2391 | 29 | 2 | 0.425000  | -9.779677472  | 1.523504153  | -11.167887538 | 1 | 0 | 0 | # | ho  |
| 2392 | 29 | 2 | 0.425000  | -5.707935677  | -1.430790090 | -12.816598978 | 1 | 0 | 0 | # | ho  |
| 2393 | 29 | 2 | 0.425000  | -8.279532585  | -1.336757339 | -8.549774810  | 1 | 0 | 0 | # | ho  |
| 2394 | 29 | 3 | -1.050000 | -8.351279233  | -1.017449350 | -11.990419251 | 1 | 0 | 0 | # | ob  |
| 2395 | 29 | 3 | -1.050000 | -8.736316052  | -1.009534011 | -14.675370135 | 1 | 0 | 0 | # | ob  |
| 2396 | 29 | 3 | -1.050000 | -6.162779590  | -1.002235530 | -10.441622885 | 1 | 0 | 0 | # | ob  |
| 2397 | 29 | 3 | -1.050000 | -8.105849550  | -3.254329459 | -13.363387416 | 1 | 0 | 0 | # | ob  |
| 2398 | 29 | 3 | -1.050000 | -5.521256058  | -3.253528090 | -9.144448299  | 1 | 0 | 0 | # | ob  |
| 2399 | 29 | 3 | -1.050000 | -7.137424505  | 1.106315515  | -11.996348257 | 1 | 0 | 0 | # | ob  |
| 2400 | 29 | 3 | -1.050000 | -7.970074866  | 3.339943172  | -13.172052555 | 1 | 0 | 0 | # | ob  |
| 2401 | 29 | 3 | -1.050000 | -5.396657334  | 3.343459909  | -8.943730207  | 1 | 0 | 0 | # | ob  |
| 2402 | 29 | 3 | -1.050000 | -7.382440482  | 3.343022387  | -10.623499070 | 1 | 0 | 0 | # | ob  |
| 2403 | 29 | 4 | -0.950000 | -9.351782553  | 1.030057382  | -10.442888188 | 1 | 0 | 0 | # | oh  |
| 2404 | 29 | 7 | -0.950000 | -6.766529560  | 1.017364731  | -14.669940000 | 1 | 0 | 0 | # | oho |
| 2405 | 29 | 3 | -1.050000 | -5.362324007  | 3.050340270  | -12.250261108 | 1 | 0 | 0 | # | ob  |
| 2406 | 29 | 4 | -0.950000 | -8.722234277  | -0.928489933 | -9.316970730  | 1 | 0 | 0 | # | oh  |
| 2407 | 29 | 3 | -1.050000 | -10.125648515 | -2.961853389 | -11.736283302 | 1 | 0 | 0 | # | ob  |
| 2408 | 29 | 4 | -0.950000 | -6.136623532  | -0.940763219 | -13.543440393 | 1 | 0 | 0 | # | oh  |
| 2409 | 29 | 3 | -1.050000 | -7.531930266  | -2.977677046 | -15.954835566 | 1 | 0 | 0 | # | ob  |
| 2410 | 29 | 3 | -1.050000 | -9.325662728  | 1.091158613  | -13.545357722 | 1 | 0 | 0 | # | ob  |
| 2411 | 29 | 3 | -1.050000 | -6.752114866  | 1.098365238  | -9.311324339  | 1 | 0 | 0 | # | ob  |
| 2412 | 29 | 3 | -1.050000 | -5.769762377  | -1.019123292 | -16.217460028 | 1 | 0 | 0 | # | ob  |
| 2413 | 29 | 3 | -1.050000 | -10.091865415 | -3.254366293 | -15.043023632 | 1 | 0 | 0 | # | ob  |
| 2414 | 29 | 3 | -1.050000 | -7.517912729  | -3.251063569 | -10.814842275 | 1 | 0 | 0 | # | ob  |
| 2415 | 29 | 5 | 2.100000  | -9.448596523  | 2.720599038  | -13.446713478 | 1 | 0 | 0 | # | st  |
| 2416 | 29 | 5 | 2.100000  | -6.876570783  | 2.729580341  | -9.218820449  | 1 | 0 | 0 | # | st  |
| 2417 | 29 | 5 | 2.100000  | -5.953223949  | -2.638063392 | -16.155125016 | 1 | 0 | 0 | # | st  |
| 2418 | 29 | 5 | 2.100000  | -8.611866039  | -2.640760033 | -14.767921646 | 1 | 0 | 0 | # | st  |
| 2419 | 29 | 5 | 2.100000  | -6.039449750  | -2.631682580 | -10.540175727 | 1 | 0 | 0 | # | st  |
| 2420 | 29 | 5 | 2.100000  | -6.946927332  | 2.723397425  | -12.059455955 | 1 | 0 | 0 | # | st  |
| 2421 | 29 | 5 | 2.100000  | -8.541181255  | -2.634695815 | -11.927421788 | 1 | 0 | 0 | # | st  |
| 2422 | 29 | 1 | 1.575000  | -7.760648102  | 0.057857326  | -2.106452507  | 1 | 0 | 0 | # | ao  |
| 2423 | 29 | 1 | 1.575000  | -5.173508114  | 0.047832665  | -6.329552507  | 1 | 0 | 0 | # | ao  |
| 2424 | 29 | 1 | 1.575000  | -10.315124157 | 0.041014554  | -0.757989037  | 1 | 0 | 0 | # | ao  |
| 2425 | 29 | 1 | 1.575000  | -7.728120700  | 0.031026926  | -4.981097695  | 1 | 0 | 0 | # | ao  |
| 2426 | 29 | 2 | 0.425000  | -7.209244145  | 1.425163371  | -6.987748987  | 1 | 0 | 0 | # | ho  |
| 2427 | 29 | 2 | 0.425000  | -9.779677472  | 1.523504153  | -2.718287538  | 1 | 0 | 0 | # | ho  |
| 2428 | 29 | 2 | 0.425000  | -5.707935677  | -1.430790090 | -4.366998978  | 1 | 0 | 0 | # | ho  |
| 2429 | 29 | 2 | 0.425000  | -8.279532585  | -1.336757339 | -0.100174810  | 1 | 0 | 0 | # | ho  |
| 2430 | 29 | 3 | -1.050000 | -8.351279233  | -1.017449350 | -3.540819251  | 1 | 0 | 0 | # | ob  |
| 2431 | 29 | 3 | -1.050000 | -8.736316052  | -1.009534011 | -6.225770135  | 1 | 0 | 0 | # | ob  |
| 2432 | 29 | 3 | -1.050000 | -6.162779590  | -1.002235530 | -1.992022885  | 1 | 0 | 0 | # | ob  |
| 2433 | 29 | 3 | -1.050000 | -8.105849550  | -3.254329459 | -4.913787416  | 1 | 0 | 0 | # | ob  |
| 2434 | 29 | 3 | -1.050000 | -5.521256058  | -3.253528090 | -0.694848299  | 1 | 0 | 0 | # | ob  |
| 2435 | 29 | 3 | -1.050000 | -9.718994217  | 1.108160884  | -7.769166009  | 1 | 0 | 0 | # | ob  |
| 2436 | 29 | 3 | -1.050000 | -7.137424505  | 1.106315515  | -3.546748257  | 1 | 0 | 0 | # | ob  |
| 2437 | 29 | 3 | -1.050000 | -7.970074866  | 3.339943172  | -4.722452555  | 1 | 0 | 0 | # | ob  |
| 2438 | 29 | 3 | -1.050000 | -5.396657334  | 3.343459909  | -0.494130207  | 1 | 0 | 0 | # | ob  |
| 2439 | 29 | 3 | -1.050000 | -9.967000490  | 3.342745271  | -6.392656438  | 1 | 0 | 0 | # | ob  |
| 2440 | 29 | 3 | -1.050000 | -7.382440482  | 3.343022387  | -2.173899070  | 1 | 0 | 0 | # | ob  |
| 2441 | 29 | 4 | -0.950000 | -9.351782553  | 1.030057382  | -1.993288188  | 1 | 0 | 0 | # | oh  |
| 2442 | 29 | 4 | -0.950000 | -6.766529560  | 1.017364731  | -6.220340000  | 1 | 0 | 0 | # | oh  |
| 2443 | 29 | 3 | -1.050000 | -7.956690954  | 3.066493209  | -8.032003882  | 1 | 0 | 0 | # | ob  |
| 2444 | 29 | 3 | -1.050000 | -5.362324007  | 3.050340270  | -3.800661108  | 1 | 0 | 0 | # | ob  |
| 2445 | 29 | 4 | -0.950000 | -8.722234277  | -0.928489933 | -0.867370730  | 1 | 0 | 0 | # | oh  |
| 2446 | 29 | 3 | -1.050000 | -10.125648515 | -2.961853389 | -3.286683302  | 1 | 0 | 0 | # | ob  |
| 2447 | 29 | 4 | -0.950000 | -6.136623532  | -0.940763219 | -5.093840393  | 1 | 0 | 0 | # | oh  |
| 2448 | 29 | 3 | -1.050000 | -7.531930266  | -2.977677046 | -7.505235566  | 1 | 0 | 0 | # | ob  |
| 2449 | 29 | 3 | -1.050000 | -9.325662728  | 1.091158613  | -5.095757722  | 1 | 0 | 0 | # | ob  |
| 2450 | 29 | 3 | -1.050000 | -6.752114866  | 1.098365238  | -0.861724339  | 1 | 0 | 0 | # | ob  |
| 2451 | 29 | 3 | -1.050000 | -5.769762377  | -1.019123292 | -7.767860028  | 1 | 0 | 0 | # | ob  |
| 2452 | 29 | 3 | -1.050000 | -10.091865415 | -3.254366293 | -6.593423632  | 1 | 0 | 0 | # | ob  |
| 2453 | 29 | 3 | -1.050000 | -7.517912729  | -3.251063569 | -2.365242275  | 1 | 0 | 0 | # | ob  |
| 2454 | 29 | 5 | 2.100000  | -9.448596523  | 2.720599038  | -4.997113478  | 1 | 0 | 0 | # | st  |
| 2455 | 29 | 5 | 2.100000  | -6.876570783  | 2.729580341  | -0.769220449  | 1 | 0 | 0 | # | st  |
| 2456 | 29 | 5 | 2.100000  | -5.953223949  | -2.638063392 | -7.705525016  | 1 | 0 | 0 | # | st  |
| 2457 | 29 | 5 | 2.100000  | -8.611866039  | -2.640760033 | -6.318321646  | 1 | 0 | 0 | # | st  |
| 2458 | 29 | 5 | 2.100000  | -6.039449750  | -2.631682580 | -2.090575727  | 1 | 0 | 0 | # | st  |
| 2459 | 29 | 5 | 2.100000  | -9.535321161  | 2.727049911  | -7.831638849  | 1 | 0 | 0 | # | st  |
| 2460 | 29 | 5 | 2.100000  | -6.946927332  | 2.723397425  | -3.609855955  | 1 | 0 | 0 | # | st  |
| 2461 | 29 | 5 | 2.100000  | -8.541181255  | -2.634695815 | -3.477821788  | 1 | 0 | 0 | # | st  |
| 2462 | 29 | 8 | -0.950000 | -9.735393535  | 2.961484659  | -15.319631379 | 1 | 0 | 0 | # | oht |
| 2463 | 29 | 6 | 0.425000  | -9.895636833  | 3.078655077  | -16.411736324 | 1 | 0 | 0 | # | do  |
| 2464 | 29 | 6 | 0.425000  | -5.314810057  | -2.983958974 | -18.650841835 | 1 | 0 | 0 | # | do  |
| 2465 | 30 | 8 | -0.950000 | -0.358456058  | -3.253528090 | -17.594048299 | 1 | 0 | 0 | # | oht |
| 2466 | 30 | 1 | 1.575000  | -2.597848102  | 0.057857326  | -10.556052507 | 1 | 0 | 0 | # | ao  |
| 2467 | 30 | 1 | 1.575000  | -0.010708114  | 0.047832665  | -14.779152507 | 1 | 0 | 0 | # | ao  |
| 2468 | 30 | 1 | 1.575000  | -5.152324157  | 0.041014554  | -9.207589037  | 1 | 0 | 0 | # | ao  |
| 2469 | 30 | 1 | 1.575000  | -2.565320700  | 0.031026926  | -13.430697695 | 1 | 0 | 0 | # | ao  |
| 2470 | 30 | 6 | 0.425000  | -2.046444145  | 1.425163371  | -15.437348987 | 1 | 0 | 0 | # | do  |
| 2471 | 30 | 2 | 0.425000  | -4.616877472  | 1.523504153  | -11.167887538 | 1 | 0 | 0 | # | ho  |

|      |    |   |           |              |              |               |   |   |   |   |     |
|------|----|---|-----------|--------------|--------------|---------------|---|---|---|---|-----|
| 2472 | 30 | 2 | 0.425000  | -0.545135677 | -1.430790090 | -12.816598978 | 1 | 0 | 0 | # | ho  |
| 2473 | 30 | 2 | 0.425000  | -3.116732585 | -1.336757339 | -8.549774810  | 1 | 0 | 0 | # | ho  |
| 2474 | 30 | 3 | -1.050000 | -3.188479233 | -1.017449350 | -11.990419251 | 1 | 0 | 0 | # | ob  |
| 2475 | 30 | 3 | -1.050000 | -3.573516052 | -1.009534011 | -14.675370135 | 1 | 0 | 0 | # | ob  |
| 2476 | 30 | 3 | -1.050000 | -0.999979590 | -1.002235530 | -10.441622885 | 1 | 0 | 0 | # | ob  |
| 2477 | 30 | 3 | -1.050000 | -2.943049550 | -3.254329459 | -13.363387416 | 1 | 0 | 0 | # | ob  |
| 2478 | 30 | 3 | -1.050000 | -0.358456058 | -3.253528090 | -9.144448299  | 1 | 0 | 0 | # | ob  |
| 2479 | 30 | 3 | -1.050000 | -1.974624505 | 1.106315515  | -11.996348257 | 1 | 0 | 0 | # | ob  |
| 2480 | 30 | 3 | -1.050000 | -2.807274866 | 3.339943172  | -13.172052555 | 1 | 0 | 0 | # | ob  |
| 2481 | 30 | 3 | -1.050000 | -0.233857334 | 3.343459909  | -8.943730207  | 1 | 0 | 0 | # | ob  |
| 2482 | 30 | 3 | -1.050000 | -2.219640482 | 3.343022387  | -10.623499070 | 1 | 0 | 0 | # | ob  |
| 2483 | 30 | 4 | -0.950000 | -4.188982553 | 1.030057382  | -10.442888188 | 1 | 0 | 0 | # | oh  |
| 2484 | 30 | 7 | -0.950000 | -1.603729560 | 1.017364731  | -14.669940000 | 1 | 0 | 0 | # | oh  |
| 2485 | 30 | 3 | -1.050000 | -0.199524007 | 3.050340270  | -12.250261108 | 1 | 0 | 0 | # | ob  |
| 2486 | 30 | 4 | -0.950000 | -3.559434277 | -0.928489933 | -9.316970730  | 1 | 0 | 0 | # | oh  |
| 2487 | 30 | 3 | -1.050000 | -4.962848515 | -2.961853389 | -11.736283302 | 1 | 0 | 0 | # | ob  |
| 2488 | 30 | 4 | -0.950000 | -0.973823532 | -0.940763219 | -13.543440393 | 1 | 0 | 0 | # | oh  |
| 2489 | 30 | 3 | -1.050000 | -2.369130266 | -2.977677046 | -15.954835566 | 1 | 0 | 0 | # | ob  |
| 2490 | 30 | 3 | -1.050000 | -4.162862728 | 1.091158613  | -13.545357722 | 1 | 0 | 0 | # | ob  |
| 2491 | 30 | 3 | -1.050000 | -1.589314866 | 1.098365238  | -9.311324339  | 1 | 0 | 0 | # | ob  |
| 2492 | 30 | 3 | -1.050000 | -0.606962377 | -1.019123292 | -16.217460028 | 1 | 0 | 0 | # | ob  |
| 2493 | 30 | 3 | -1.050000 | -4.929065415 | -3.254366293 | -15.043023632 | 1 | 0 | 0 | # | ob  |
| 2494 | 30 | 3 | -1.050000 | -2.355112729 | -3.251063569 | -10.814842275 | 1 | 0 | 0 | # | ob  |
| 2495 | 30 | 5 | 2.100000  | -4.285796523 | 2.720599038  | -13.446713478 | 1 | 0 | 0 | # | st  |
| 2496 | 30 | 5 | 2.100000  | -1.713770783 | 2.729580341  | -9.218820449  | 1 | 0 | 0 | # | st  |
| 2497 | 30 | 5 | 2.100000  | -0.790423949 | -2.638063392 | -16.155125016 | 1 | 0 | 0 | # | st  |
| 2498 | 30 | 5 | 2.100000  | -3.449066039 | -2.640760033 | -14.767921646 | 1 | 0 | 0 | # | st  |
| 2499 | 30 | 5 | 2.100000  | -0.876649750 | -2.631682580 | -10.540175727 | 1 | 0 | 0 | # | st  |
| 2500 | 30 | 5 | 2.100000  | -1.784127332 | 2.723397425  | -12.059455955 | 1 | 0 | 0 | # | st  |
| 2501 | 30 | 5 | 2.100000  | -3.378381255 | -2.634695815 | -11.927421788 | 1 | 0 | 0 | # | st  |
| 2502 | 30 | 1 | 1.575000  | -2.597848102 | 0.057857326  | -2.106452507  | 1 | 0 | 0 | # | ao  |
| 2503 | 30 | 1 | 1.575000  | -0.010708114 | 0.047832665  | -6.329552507  | 1 | 0 | 0 | # | ao  |
| 2504 | 30 | 1 | 1.575000  | -5.152324157 | 0.041014554  | -0.757989037  | 1 | 0 | 0 | # | ao  |
| 2505 | 30 | 1 | 1.575000  | -2.565320700 | 0.031026926  | -4.981097695  | 1 | 0 | 0 | # | ao  |
| 2506 | 30 | 2 | 0.425000  | -2.046444145 | 1.425163371  | -6.987748987  | 1 | 0 | 0 | # | ho  |
| 2507 | 30 | 2 | 0.425000  | -4.616877472 | 1.523504153  | -2.718287538  | 1 | 0 | 0 | # | ho  |
| 2508 | 30 | 2 | 0.425000  | -0.545135677 | -1.430790090 | -4.366998978  | 1 | 0 | 0 | # | ho  |
| 2509 | 30 | 2 | 0.425000  | -3.116732585 | -1.336757339 | -0.100174810  | 1 | 0 | 0 | # | ho  |
| 2510 | 30 | 3 | -1.050000 | -3.188479233 | -1.017449350 | -3.540819251  | 1 | 0 | 0 | # | ob  |
| 2511 | 30 | 3 | -1.050000 | -3.573516052 | -1.009534011 | -6.225770135  | 1 | 0 | 0 | # | ob  |
| 2512 | 30 | 3 | -1.050000 | -0.999979590 | -1.002235530 | -11.992022885 | 1 | 0 | 0 | # | ob  |
| 2513 | 30 | 3 | -1.050000 | -2.943049550 | -3.254329459 | -4.913787416  | 1 | 0 | 0 | # | ob  |
| 2514 | 30 | 3 | -1.050000 | -0.358456058 | -3.253528090 | -0.694848299  | 1 | 0 | 0 | # | ob  |
| 2515 | 30 | 3 | -1.050000 | -4.556194217 | 1.108160884  | -7.769166009  | 1 | 0 | 0 | # | ob  |
| 2516 | 30 | 3 | -1.050000 | -1.974624505 | 1.106315515  | -3.546748257  | 1 | 0 | 0 | # | ob  |
| 2517 | 30 | 3 | -1.050000 | -2.807274866 | 3.339943172  | -4.722452555  | 1 | 0 | 0 | # | ob  |
| 2518 | 30 | 3 | -1.050000 | -0.233857334 | 3.343459909  | -0.494130207  | 1 | 0 | 0 | # | ob  |
| 2519 | 30 | 3 | -1.050000 | -4.804200490 | 3.342745271  | -6.392656438  | 1 | 0 | 0 | # | ob  |
| 2520 | 30 | 3 | -1.050000 | -2.219640482 | 3.343022387  | -2.173899070  | 1 | 0 | 0 | # | ob  |
| 2521 | 30 | 4 | -0.950000 | -4.188982553 | 1.030057382  | -1.993288188  | 1 | 0 | 0 | # | oh  |
| 2522 | 30 | 4 | -0.950000 | -1.603729560 | 1.017364731  | -6.220340000  | 1 | 0 | 0 | # | oh  |
| 2523 | 30 | 3 | -1.050000 | -2.793809054 | 3.066493209  | -8.032003882  | 1 | 0 | 0 | # | ob  |
| 2524 | 30 | 3 | -1.050000 | -0.199524007 | 3.050340270  | -3.800661108  | 1 | 0 | 0 | # | ob  |
| 2525 | 30 | 4 | -0.950000 | -3.559434277 | -0.928489933 | -0.867370730  | 1 | 0 | 0 | # | oh  |
| 2526 | 30 | 3 | -1.050000 | -4.962848515 | -2.961853389 | -3.286683302  | 1 | 0 | 0 | # | ob  |
| 2527 | 30 | 4 | -0.950000 | -0.973823532 | -0.940763219 | -5.093840393  | 1 | 0 | 0 | # | oh  |
| 2528 | 30 | 3 | -1.050000 | -2.369130266 | -2.977677046 | -7.505235566  | 1 | 0 | 0 | # | ob  |
| 2529 | 30 | 3 | -1.050000 | -4.162862728 | 1.091158613  | -5.095757722  | 1 | 0 | 0 | # | ob  |
| 2530 | 30 | 3 | -1.050000 | -1.589314866 | 1.098365238  | -0.861724339  | 1 | 0 | 0 | # | ob  |
| 2531 | 30 | 3 | -1.050000 | -0.606962377 | -1.019123292 | -7.767860028  | 1 | 0 | 0 | # | ob  |
| 2532 | 30 | 3 | -1.050000 | -4.929065415 | -3.254366293 | -6.593423632  | 1 | 0 | 0 | # | ob  |
| 2533 | 30 | 3 | -1.050000 | -2.355112729 | -3.251063569 | -2.365242275  | 1 | 0 | 0 | # | ob  |
| 2534 | 30 | 5 | 2.100000  | -4.285796523 | 2.720599038  | -4.997113478  | 1 | 0 | 0 | # | st  |
| 2535 | 30 | 5 | 2.100000  | -1.713770783 | 2.729580341  | -0.769220449  | 1 | 0 | 0 | # | st  |
| 2536 | 30 | 5 | 2.100000  | -0.790423949 | -2.638063392 | -7.705525016  | 1 | 0 | 0 | # | st  |
| 2537 | 30 | 5 | 2.100000  | -3.449066039 | -2.640760033 | -6.318321646  | 1 | 0 | 0 | # | st  |
| 2538 | 30 | 5 | 2.100000  | -0.876649750 | -2.631682580 | -2.090575727  | 1 | 0 | 0 | # | st  |
| 2539 | 30 | 5 | 2.100000  | -4.372521161 | 2.727049911  | -7.831638849  | 1 | 0 | 0 | # | st  |
| 2540 | 30 | 5 | 2.100000  | -1.784127332 | 2.723397425  | -3.609855955  | 1 | 0 | 0 | # | st  |
| 2541 | 30 | 5 | 2.100000  | -3.378381255 | -2.634695815 | -3.477821788  | 1 | 0 | 0 | # | st  |
| 2542 | 30 | 8 | -0.950000 | -4.572593535 | 2.961484659  | -15.319631379 | 1 | 0 | 0 | # | oht |
| 2543 | 30 | 6 | 0.425000  | -4.732836833 | 3.078655077  | -16.411736324 | 1 | 0 | 0 | # | do  |
| 2544 | 30 | 6 | 0.425000  | -0.152010057 | -2.983958974 | -18.650841835 | 1 | 0 | 0 | # | do  |
| 2545 | 31 | 8 | -0.950000 | 4.804343942  | 6.130571910  | -17.594048299 | 0 | 0 | 0 | # | oht |
| 2546 | 31 | 1 | 1.575000  | 2.564951898  | 9.441957326  | -10.556052507 | 0 | 0 | 0 | # | ao  |
| 2547 | 31 | 1 | 1.575000  | 5.152091886  | 9.431932665  | -14.779152507 | 0 | 0 | 0 | # | ao  |
| 2548 | 31 | 1 | 1.575000  | 0.010475843  | 9.425114554  | -9.207589037  | 0 | 0 | 0 | # | ao  |
| 2549 | 31 | 1 | 1.575000  | 2.597479300  | 9.415126926  | -13.430697695 | 0 | 0 | 0 | # | ao  |
| 2550 | 31 | 6 | 0.425000  | 3.116355855  | 10.809263371 | -15.437348987 | 0 | 0 | 0 | # | do  |
| 2551 | 31 | 2 | 0.425000  | 0.545922528  | 10.907604153 | -11.167887538 | 0 | 0 | 0 | # | ho  |
| 2552 | 31 | 2 | 0.425000  | 4.617664323  | 7.953309910  | -12.816598978 | 0 | 0 | 0 | # | ho  |
| 2553 | 31 | 2 | 0.425000  | 2.046067415  | 8.047342661  | -8.549774810  | 0 | 0 | 0 | # | ho  |
| 2554 | 31 | 3 | -1.050000 | 1.974320767  | 8.366650650  | -11.990419251 | 0 | 0 | 0 | # | ob  |
| 2555 | 31 | 3 | -1.050000 | 1.589283948  | 8.374565989  | -14.675370135 | 0 | 0 | 0 | # | ob  |
| 2556 | 31 | 3 | -1.050000 | 4.162820410  | 8.381864470  | -10.441622885 | 0 | 0 | 0 | # | ob  |
| 2557 | 31 | 3 | -1.050000 | 2.219750450  | 6.129770541  | -13.363387416 | 0 | 0 | 0 | # | ob  |
| 2558 | 31 | 3 | -1.050000 | 4.804343942  | 6.130571910  | -9.144448299  | 0 | 0 | 0 | # | ob  |
| 2559 | 31 | 3 | -1.050000 | 3.188175495  | 10.490415515 | -11.996348257 | 0 | 0 | 0 | # | ob  |
| 2560 | 31 | 3 | -1.050000 | 2.355525134  | 12.724043172 | -13.172052555 | 0 | 0 | 0 | # | ob  |
| 2561 | 31 | 3 | -1.050000 | 4.928942666  | 12.727559909 | -8.943730207  | 0 | 0 | 0 | # | ob  |
| 2562 | 31 | 3 | -1.050000 | 2.943159518  | 12.727122387 | -10.623499070 | 0 | 0 | 0 | # | ob  |
| 2563 | 31 | 4 | -0.950000 | 0.973817447  | 10.414157382 | -10.442888188 | 0 | 0 | 0 | # | oh  |
| 2564 | 31 | 7 | -0.950000 | 3.559070440  | 10.401464731 | -14.669940000 | 0 | 0 | 0 | # | oho |

|      |    |   |           |              |              |               |   |   |   |     |
|------|----|---|-----------|--------------|--------------|---------------|---|---|---|-----|
| 2565 | 31 | 3 | -1.050000 | 4.963275993  | 12.434440270 | -12.250261108 | 0 | 0 | 0 | ob  |
| 2566 | 31 | 4 | -0.950000 | 1.603365723  | 8.455610067  | -9.316970730  | 0 | 0 | 0 | oh  |
| 2567 | 31 | 3 | -1.050000 | 0.199951485  | 6.422246611  | -11.736283302 | 0 | 0 | 0 | ob  |
| 2568 | 31 | 4 | -0.950000 | 4.188976468  | 8.443336781  | -13.543440393 | 0 | 0 | 0 | oh  |
| 2569 | 31 | 3 | -1.050000 | 2.793669734  | 6.406422954  | -15.954835566 | 0 | 0 | 0 | ob  |
| 2570 | 31 | 3 | -1.050000 | 0.999937272  | 10.475258613 | -13.545357722 | 0 | 0 | 0 | ob  |
| 2571 | 31 | 3 | -1.050000 | 3.573485134  | 10.482465238 | -9.311324339  | 0 | 0 | 0 | ob  |
| 2572 | 31 | 3 | -1.050000 | 4.555837623  | 8.364976708  | -16.217460028 | 0 | 0 | 0 | ob  |
| 2573 | 31 | 3 | -1.050000 | 0.233734585  | 6.129733707  | -15.043023632 | 0 | 0 | 0 | ob  |
| 2574 | 31 | 3 | -1.050000 | 2.807687271  | 6.133036431  | -10.814842275 | 0 | 0 | 0 | ob  |
| 2575 | 31 | 5 | 2.100000  | 0.877003477  | 12.104699038 | -13.446713478 | 0 | 0 | 0 | st  |
| 2576 | 31 | 5 | 2.100000  | 3.449029217  | 12.113680341 | -9.218820449  | 0 | 0 | 0 | st  |
| 2577 | 31 | 5 | 2.100000  | 4.372376051  | 6.746036608  | -16.155125016 | 0 | 0 | 0 | st  |
| 2578 | 31 | 5 | 2.100000  | 1.713733961  | 6.743339967  | -14.767921646 | 0 | 0 | 0 | st  |
| 2579 | 31 | 5 | 2.100000  | 4.286150250  | 6.752417420  | -10.540175727 | 0 | 0 | 0 | st  |
| 2580 | 31 | 5 | 2.100000  | 3.378672668  | 12.107497425 | -12.059455955 | 0 | 0 | 0 | st  |
| 2581 | 31 | 5 | 2.100000  | 1.784418745  | 6.749404185  | -11.927421788 | 0 | 0 | 0 | st  |
| 2582 | 31 | 1 | 1.575000  | 2.564951898  | 9.441957326  | -2.106452507  | 0 | 0 | 0 | ao  |
| 2583 | 31 | 1 | 1.575000  | 5.152091886  | 9.431932665  | -6.329552507  | 0 | 0 | 0 | ao  |
| 2584 | 31 | 1 | 1.575000  | 0.010475843  | 9.425114554  | -0.757989037  | 0 | 0 | 0 | ao  |
| 2585 | 31 | 1 | 1.575000  | 2.597479300  | 9.415126926  | -4.981097695  | 0 | 0 | 0 | ao  |
| 2586 | 31 | 2 | 0.425000  | 3.116355855  | 10.809263371 | -6.987748987  | 0 | 0 | 0 | ho  |
| 2587 | 31 | 2 | 0.425000  | 0.545922528  | 10.907604153 | -2.718287538  | 0 | 0 | 0 | ho  |
| 2588 | 31 | 2 | 0.425000  | 4.617664323  | 7.953309910  | -4.366998978  | 0 | 0 | 0 | ho  |
| 2589 | 31 | 2 | 0.425000  | 2.046067415  | 8.047342661  | -0.100174810  | 0 | 0 | 0 | ho  |
| 2590 | 31 | 3 | -1.050000 | 1.974320767  | 8.366650650  | -3.540819251  | 0 | 0 | 0 | ob  |
| 2591 | 31 | 3 | -1.050000 | 1.589283948  | 8.374565989  | -6.225770135  | 0 | 0 | 0 | ob  |
| 2592 | 31 | 3 | -1.050000 | 4.162820410  | 8.381864470  | -1.992022885  | 0 | 0 | 0 | ob  |
| 2593 | 31 | 3 | -1.050000 | 2.219750450  | 6.129770541  | -4.913787416  | 0 | 0 | 0 | ob  |
| 2594 | 31 | 3 | -1.050000 | 4.804343942  | 6.130571910  | -0.694848299  | 0 | 0 | 0 | ob  |
| 2595 | 31 | 3 | -1.050000 | 0.606605783  | 10.492260884 | -7.769166009  | 0 | 0 | 0 | ob  |
| 2596 | 31 | 3 | -1.050000 | 3.188175495  | 10.490415515 | -3.546748257  | 0 | 0 | 0 | ob  |
| 2597 | 31 | 3 | -1.050000 | 2.355525134  | 12.724043172 | -4.722452555  | 0 | 0 | 0 | ob  |
| 2598 | 31 | 3 | -1.050000 | 4.928942666  | 12.727559909 | -0.494130207  | 0 | 0 | 0 | ob  |
| 2599 | 31 | 3 | -1.050000 | 0.358599510  | 12.726845271 | -6.392656438  | 0 | 0 | 0 | ob  |
| 2600 | 31 | 3 | -1.050000 | 2.943159518  | 12.727122387 | -2.173899070  | 0 | 0 | 0 | ob  |
| 2601 | 31 | 4 | -0.950000 | 0.973817447  | 10.414157382 | -1.993288188  | 0 | 0 | 0 | oh  |
| 2602 | 31 | 4 | -0.950000 | 3.559070440  | 10.401464731 | -6.220340000  | 0 | 0 | 0 | oh  |
| 2603 | 31 | 3 | -1.050000 | 2.368990946  | 12.450593209 | -8.032003882  | 0 | 0 | 0 | ob  |
| 2604 | 31 | 3 | -1.050000 | 4.963275993  | 12.434440270 | -3.800661108  | 0 | 0 | 0 | ob  |
| 2605 | 31 | 4 | -0.950000 | 1.603365723  | 8.455610067  | -0.867370730  | 0 | 0 | 0 | oh  |
| 2606 | 31 | 3 | -1.050000 | 0.199951485  | 6.422246611  | -3.286683302  | 0 | 0 | 0 | ob  |
| 2607 | 31 | 4 | -0.950000 | 4.188976468  | 8.443336781  | -5.093840393  | 0 | 0 | 0 | oh  |
| 2608 | 31 | 3 | -1.050000 | 2.793669734  | 6.406422954  | -7.505235566  | 0 | 0 | 0 | ob  |
| 2609 | 31 | 3 | -1.050000 | 0.999937272  | 10.475258613 | -5.095757722  | 0 | 0 | 0 | ob  |
| 2610 | 31 | 3 | -1.050000 | 3.573485134  | 10.482465238 | -0.861724339  | 0 | 0 | 0 | ob  |
| 2611 | 31 | 3 | -1.050000 | 4.555837623  | 8.364976708  | -7.767860028  | 0 | 0 | 0 | ob  |
| 2612 | 31 | 3 | -1.050000 | 0.233734585  | 6.129733707  | -6.593423632  | 0 | 0 | 0 | ob  |
| 2613 | 31 | 3 | -1.050000 | 2.807687271  | 6.133036431  | -2.365242275  | 0 | 0 | 0 | ob  |
| 2614 | 31 | 5 | 2.100000  | 0.877003477  | 12.104699038 | -4.997113478  | 0 | 0 | 0 | st  |
| 2615 | 31 | 5 | 2.100000  | 3.449029217  | 12.113680341 | -0.769220449  | 0 | 0 | 0 | st  |
| 2616 | 31 | 5 | 2.100000  | 4.372376051  | 6.746036608  | -7.705525016  | 0 | 0 | 0 | st  |
| 2617 | 31 | 5 | 2.100000  | 1.713733961  | 6.743339967  | -6.318321646  | 0 | 0 | 0 | st  |
| 2618 | 31 | 5 | 2.100000  | 4.286150250  | 6.752417420  | -2.090575727  | 0 | 0 | 0 | st  |
| 2619 | 31 | 5 | 2.100000  | 0.790278839  | 12.111149911 | -7.831638849  | 0 | 0 | 0 | st  |
| 2620 | 31 | 5 | 2.100000  | 3.378672668  | 12.107497425 | -3.609855955  | 0 | 0 | 0 | st  |
| 2621 | 31 | 5 | 2.100000  | 1.784418745  | 6.749404185  | -3.477821788  | 0 | 0 | 0 | st  |
| 2622 | 31 | 8 | -0.950000 | 0.590206465  | 12.345584659 | -15.319631379 | 0 | 0 | 0 | oht |
| 2623 | 31 | 6 | 0.425000  | 0.429963167  | 12.462755077 | -16.411736324 | 0 | 0 | 0 | do  |
| 2624 | 31 | 6 | 0.425000  | 5.010789943  | 6.400141026  | -18.650841835 | 0 | 0 | 0 | do  |
| 2625 | 32 | 8 | -0.950000 | 9.967143942  | 6.130571910  | -17.594048299 | 0 | 0 | 0 | oht |
| 2626 | 32 | 1 | 1.575000  | 7.727751898  | 9.441957326  | -10.556052507 | 0 | 0 | 0 | ao  |
| 2627 | 32 | 1 | 1.575000  | 10.314891886 | 9.431932665  | -14.779152507 | 0 | 0 | 0 | ao  |
| 2628 | 32 | 1 | 1.575000  | 5.173275843  | 9.425114554  | -9.207589037  | 0 | 0 | 0 | ao  |
| 2629 | 32 | 1 | 1.575000  | 7.760279300  | 9.415126926  | -13.430697695 | 0 | 0 | 0 | ao  |
| 2630 | 32 | 6 | 0.425000  | 8.279155855  | 10.809263371 | -15.437348987 | 0 | 0 | 0 | do  |
| 2631 | 32 | 2 | 0.425000  | 5.708722528  | 10.907604153 | -11.167887538 | 0 | 0 | 0 | ho  |
| 2632 | 32 | 2 | 0.425000  | 9.780464323  | 7.953309910  | -12.816598978 | 0 | 0 | 0 | ho  |
| 2633 | 32 | 2 | 0.425000  | 7.208867415  | 8.047342661  | -8.549774810  | 0 | 0 | 0 | ho  |
| 2634 | 32 | 3 | -1.050000 | 7.137120767  | 8.366650650  | -11.990419251 | 0 | 0 | 0 | ob  |
| 2635 | 32 | 3 | -1.050000 | 6.752083948  | 8.374565989  | -14.675370135 | 0 | 0 | 0 | ob  |
| 2636 | 32 | 3 | -1.050000 | 9.325620410  | 8.381864470  | -10.441622885 | 0 | 0 | 0 | ob  |
| 2637 | 32 | 3 | -1.050000 | 7.382550450  | 6.129770541  | -13.363387416 | 0 | 0 | 0 | ob  |
| 2638 | 32 | 3 | -1.050000 | 9.967143942  | 6.130571910  | -9.144448299  | 0 | 0 | 0 | ob  |
| 2639 | 32 | 3 | -1.050000 | 8.350975495  | 10.490415515 | -11.996348257 | 0 | 0 | 0 | ob  |
| 2640 | 32 | 3 | -1.050000 | 7.518325134  | 12.724043172 | -13.172052555 | 0 | 0 | 0 | ob  |
| 2641 | 32 | 3 | -1.050000 | 10.091742666 | 12.727559909 | -8.943730207  | 0 | 0 | 0 | ob  |
| 2642 | 32 | 3 | -1.050000 | 8.105959518  | 12.727122387 | -10.623499070 | 0 | 0 | 0 | ob  |
| 2643 | 32 | 4 | -0.950000 | 6.136617447  | 10.414157382 | -10.442888188 | 0 | 0 | 0 | oh  |
| 2644 | 32 | 7 | -0.950000 | 8.721870440  | 10.401464731 | -14.669940000 | 0 | 0 | 0 | oho |
| 2645 | 32 | 3 | -1.050000 | 10.126075993 | 12.434440270 | -12.250261108 | 0 | 0 | 0 | ob  |
| 2646 | 32 | 4 | -0.950000 | 6.766165723  | 8.455610067  | -9.316970730  | 0 | 0 | 0 | oh  |
| 2647 | 32 | 3 | -1.050000 | 5.362751485  | 6.422246611  | -11.736283302 | 0 | 0 | 0 | ob  |
| 2648 | 32 | 4 | -0.950000 | 9.351776468  | 8.443336781  | -13.543440393 | 0 | 0 | 0 | oh  |
| 2649 | 32 | 3 | -1.050000 | 7.956469734  | 6.406422954  | -15.954835566 | 0 | 0 | 0 | ob  |
| 2650 | 32 | 3 | -1.050000 | 6.162737272  | 10.475258613 | -13.545357722 | 0 | 0 | 0 | ob  |
| 2651 | 32 | 3 | -1.050000 | 8.736285134  | 10.482465238 | -9.311324339  | 0 | 0 | 0 | ob  |
| 2652 | 32 | 3 | -1.050000 | 9.718637623  | 8.364976708  | -16.217460028 | 0 | 0 | 0 | ob  |
| 2653 | 32 | 3 | -1.050000 | 5.396534585  | 6.129733707  | -15.043023632 | 0 | 0 | 0 | ob  |
| 2654 | 32 | 3 | -1.050000 | 7.970487271  | 6.133036431  | -10.814842275 | 0 | 0 | 0 | ob  |
| 2655 | 32 | 5 | 2.100000  | 6.039803477  | 12.104699038 | -13.446713478 | 0 | 0 | 0 | st  |
| 2656 | 32 | 5 | 2.100000  | 8.611829217  | 12.113680341 | -9.218820449  | 0 | 0 | 0 | st  |
| 2657 | 32 | 5 | 2.100000  | 9.535176051  | 6.746036608  | -16.155125016 | 0 | 0 | 0 | st  |

|      |    |   |           |              |              |               |   |   |   |   |     |
|------|----|---|-----------|--------------|--------------|---------------|---|---|---|---|-----|
| 2658 | 32 | 5 | 2.100000  | 6.876533961  | 6.743339967  | -14.767921646 | 0 | 0 | 0 | # | st  |
| 2659 | 32 | 5 | 2.100000  | 9.448950250  | 6.752417420  | -10.540175727 | 0 | 0 | 0 | # | st  |
| 2660 | 32 | 5 | 2.100000  | 8.541472668  | 12.107497425 | -12.059455955 | 0 | 0 | 0 | # | st  |
| 2661 | 32 | 5 | 2.100000  | 6.947218745  | 6.749404185  | -11.927421788 | 0 | 0 | 0 | # | st  |
| 2662 | 32 | 1 | 1.575000  | 7.727751898  | 9.441957326  | -2.106452507  | 0 | 0 | 0 | # | ao  |
| 2663 | 32 | 1 | 1.575000  | 10.314891886 | 9.431932665  | -6.329552507  | 0 | 0 | 0 | # | ao  |
| 2664 | 32 | 1 | 1.575000  | 5.173275843  | 9.425114554  | -0.757989037  | 0 | 0 | 0 | # | ao  |
| 2665 | 32 | 1 | 1.575000  | 7.760279300  | 9.415126926  | -4.981097695  | 0 | 0 | 0 | # | ao  |
| 2666 | 32 | 2 | 0.425000  | 8.279155855  | 10.809263371 | -6.987748987  | 0 | 0 | 0 | # | ho  |
| 2667 | 32 | 2 | 0.425000  | 5.708722528  | 10.907604153 | -2.718287538  | 0 | 0 | 0 | # | ho  |
| 2668 | 32 | 2 | 0.425000  | 9.780464323  | 7.953309910  | -4.366998978  | 0 | 0 | 0 | # | ho  |
| 2669 | 32 | 2 | 0.425000  | 7.208867415  | 8.047342661  | -0.100174810  | 0 | 0 | 0 | # | ho  |
| 2670 | 32 | 3 | -1.050000 | 7.137120767  | 8.366650650  | -3.540819251  | 0 | 0 | 0 | # | ob  |
| 2671 | 32 | 3 | -1.050000 | 6.752083948  | 8.374565989  | -6.225770135  | 0 | 0 | 0 | # | ob  |
| 2672 | 32 | 3 | -1.050000 | 9.325620410  | 8.381864470  | -1.992022885  | 0 | 0 | 0 | # | ob  |
| 2673 | 32 | 3 | -1.050000 | 7.382550450  | 6.129770541  | -4.913787416  | 0 | 0 | 0 | # | ob  |
| 2674 | 32 | 3 | -1.050000 | 9.967143942  | 6.130571910  | -0.694848299  | 0 | 0 | 0 | # | ob  |
| 2675 | 32 | 3 | -1.050000 | 5.769405783  | 10.492260884 | -7.769166009  | 0 | 0 | 0 | # | ob  |
| 2676 | 32 | 3 | -1.050000 | 8.350975495  | 10.490415515 | -3.546748257  | 0 | 0 | 0 | # | ob  |
| 2677 | 32 | 3 | -1.050000 | 7.518325134  | 12.724043172 | -4.722452555  | 0 | 0 | 0 | # | ob  |
| 2678 | 32 | 3 | -1.050000 | 10.091742666 | 12.727559909 | -0.494130207  | 0 | 0 | 0 | # | ob  |
| 2679 | 32 | 3 | -1.050000 | 5.521399510  | 12.726845271 | -6.392656438  | 0 | 0 | 0 | # | ob  |
| 2680 | 32 | 3 | -1.050000 | 8.105959518  | 12.727122387 | -2.173899070  | 0 | 0 | 0 | # | ob  |
| 2681 | 32 | 4 | -0.950000 | 6.136617447  | 10.414157382 | -1.993288188  | 0 | 0 | 0 | # | oh  |
| 2682 | 32 | 4 | -0.950000 | 8.721870440  | 10.401464731 | -6.220340000  | 0 | 0 | 0 | # | oh  |
| 2683 | 32 | 3 | -1.050000 | 7.531790946  | 12.450593209 | -8.032003882  | 0 | 0 | 0 | # | ob  |
| 2684 | 32 | 3 | -1.050000 | 10.126075993 | 12.434440270 | -3.800661108  | 0 | 0 | 0 | # | ob  |
| 2685 | 32 | 4 | -0.950000 | 6.766165723  | 8.455610067  | -0.867370730  | 0 | 0 | 0 | # | oh  |
| 2686 | 32 | 3 | -1.050000 | 5.362751485  | 6.422246611  | -3.286683302  | 0 | 0 | 0 | # | ob  |
| 2687 | 32 | 4 | -0.950000 | 9.351776468  | 8.443336781  | -5.093840393  | 0 | 0 | 0 | # | oh  |
| 2688 | 32 | 3 | -1.050000 | 7.956469734  | 6.406422954  | -7.505235566  | 0 | 0 | 0 | # | ob  |
| 2689 | 32 | 3 | -1.050000 | 6.162737272  | 10.475258613 | -5.095757722  | 0 | 0 | 0 | # | ob  |
| 2690 | 32 | 3 | -1.050000 | 8.736285134  | 10.482465238 | -0.861724339  | 0 | 0 | 0 | # | ob  |
| 2691 | 32 | 3 | -1.050000 | 9.718637623  | 8.364976708  | -7.767860028  | 0 | 0 | 0 | # | ob  |
| 2692 | 32 | 3 | -1.050000 | 5.396534585  | 6.129733707  | -6.593423632  | 0 | 0 | 0 | # | ob  |
| 2693 | 32 | 3 | -1.050000 | 7.970487271  | 6.133036431  | -2.365242275  | 0 | 0 | 0 | # | ob  |
| 2694 | 32 | 5 | 2.100000  | 6.039803477  | 12.104699038 | -4.997113478  | 0 | 0 | 0 | # | st  |
| 2695 | 32 | 5 | 2.100000  | 8.611829217  | 12.113680341 | -0.769220449  | 0 | 0 | 0 | # | st  |
| 2696 | 32 | 5 | 2.100000  | 9.535176051  | 6.746036608  | -7.705525016  | 0 | 0 | 0 | # | st  |
| 2697 | 32 | 5 | 2.100000  | 6.876533961  | 6.743339967  | -6.318321646  | 0 | 0 | 0 | # | st  |
| 2698 | 32 | 5 | 2.100000  | 9.448950250  | 6.752417420  | -2.090575727  | 0 | 0 | 0 | # | st  |
| 2699 | 32 | 5 | 2.100000  | 5.953078839  | 12.111149911 | -7.831638849  | 0 | 0 | 0 | # | st  |
| 2700 | 32 | 5 | 2.100000  | 8.541472668  | 12.107497425 | -3.609855955  | 0 | 0 | 0 | # | st  |
| 2701 | 32 | 5 | 2.100000  | 6.947218745  | 6.749404185  | -3.477821788  | 0 | 0 | 0 | # | st  |
| 2702 | 32 | 8 | -0.950000 | 5.753006465  | 12.345584659 | -15.319631379 | 0 | 0 | 0 | # | oht |
| 2703 | 32 | 6 | 0.425000  | 5.592763167  | 12.462755077 | -16.411736324 | 0 | 0 | 0 | # | do  |
| 2704 | 32 | 6 | 0.425000  | 10.173589943 | 6.400141026  | -18.650841835 | 0 | 0 | 0 | # | do  |
| 2705 | 33 | 8 | -0.950000 | 15.129943942 | 6.130571910  | -17.594048299 | 0 | 0 | 0 | # | oht |
| 2706 | 33 | 1 | 1.575000  | 12.890551898 | 9.441957326  | -10.556052507 | 0 | 0 | 0 | # | ao  |
| 2707 | 33 | 1 | 1.575000  | 15.477691886 | 9.431932665  | -14.779152507 | 0 | 0 | 0 | # | ao  |
| 2708 | 33 | 1 | 1.575000  | 10.336075843 | 9.425114554  | -9.207589037  | 0 | 0 | 0 | # | ao  |
| 2709 | 33 | 1 | 1.575000  | 12.923079300 | 9.415126926  | -13.430697695 | 0 | 0 | 0 | # | ao  |
| 2710 | 33 | 6 | 0.425000  | 13.441955855 | 10.809263371 | -15.437348987 | 0 | 0 | 0 | # | do  |
| 2711 | 33 | 2 | 0.425000  | 10.871522528 | 10.907604153 | -11.167887538 | 0 | 0 | 0 | # | ho  |
| 2712 | 33 | 2 | 0.425000  | 14.943264323 | 7.953309910  | -12.816598978 | 0 | 0 | 0 | # | ho  |
| 2713 | 33 | 2 | 0.425000  | 12.371667415 | 8.047342661  | -8.549774810  | 0 | 0 | 0 | # | ho  |
| 2714 | 33 | 3 | -1.050000 | 12.299920767 | 8.366650650  | -11.990419251 | 0 | 0 | 0 | # | ob  |
| 2715 | 33 | 3 | -1.050000 | 11.914883948 | 8.374565989  | -14.675370135 | 0 | 0 | 0 | # | ob  |
| 2716 | 33 | 3 | -1.050000 | 14.488420410 | 8.381864470  | -10.441622885 | 0 | 0 | 0 | # | ob  |
| 2717 | 33 | 3 | -1.050000 | 12.545350450 | 6.129770541  | -13.363387416 | 0 | 0 | 0 | # | ob  |
| 2718 | 33 | 3 | -1.050000 | 15.129943942 | 6.130571910  | -9.144448299  | 0 | 0 | 0 | # | ob  |
| 2719 | 33 | 3 | -1.050000 | 13.513775495 | 10.490415515 | -11.996348257 | 0 | 0 | 0 | # | ob  |
| 2720 | 33 | 3 | -1.050000 | 12.681125134 | 12.724043172 | -13.172052555 | 0 | 0 | 0 | # | ob  |
| 2721 | 33 | 3 | -1.050000 | 15.254542666 | 12.727559909 | -8.943730207  | 0 | 0 | 0 | # | ob  |
| 2722 | 33 | 3 | -1.050000 | 13.268759518 | 12.727122387 | -10.623499070 | 0 | 0 | 0 | # | ob  |
| 2723 | 33 | 4 | -0.950000 | 11.299417447 | 10.414157382 | -10.442888188 | 0 | 0 | 0 | # | oh  |
| 2724 | 33 | 7 | -0.950000 | 13.884670440 | 10.401464731 | -14.669940000 | 0 | 0 | 0 | # | oh  |
| 2725 | 33 | 3 | -1.050000 | 15.288875993 | 12.434440270 | -12.250261108 | 0 | 0 | 0 | # | ob  |
| 2726 | 33 | 4 | -0.950000 | 11.928965723 | 8.455610067  | -9.316970730  | 0 | 0 | 0 | # | ob  |
| 2727 | 33 | 3 | -1.050000 | 10.525551485 | 6.422246611  | -11.736283302 | 0 | 0 | 0 | # | ob  |
| 2728 | 33 | 4 | -0.950000 | 14.514576468 | 8.443336781  | -13.543440393 | 0 | 0 | 0 | # | oh  |
| 2729 | 33 | 3 | -1.050000 | 13.119269734 | 6.406422954  | -15.954835566 | 0 | 0 | 0 | # | ob  |
| 2730 | 33 | 3 | -1.050000 | 11.325537272 | 10.475258613 | -13.545357722 | 0 | 0 | 0 | # | ob  |
| 2731 | 33 | 3 | -1.050000 | 13.899085134 | 10.482465238 | -9.311324339  | 0 | 0 | 0 | # | ob  |
| 2732 | 33 | 3 | -1.050000 | 14.881437623 | 8.364976708  | -16.217460028 | 0 | 0 | 0 | # | ob  |
| 2733 | 33 | 3 | -1.050000 | 10.559334585 | 6.129733707  | -15.043023632 | 0 | 0 | 0 | # | ob  |
| 2734 | 33 | 3 | -1.050000 | 13.133287271 | 6.133036431  | -10.814842275 | 0 | 0 | 0 | # | ob  |
| 2735 | 33 | 5 | 2.100000  | 11.202603477 | 12.104699038 | -13.446713478 | 0 | 0 | 0 | # | st  |
| 2736 | 33 | 5 | 2.100000  | 13.774629217 | 12.113680341 | -9.218820449  | 0 | 0 | 0 | # | st  |
| 2737 | 33 | 5 | 2.100000  | 14.697976051 | 6.746036608  | -16.155125016 | 0 | 0 | 0 | # | st  |
| 2738 | 33 | 5 | 2.100000  | 12.039333961 | 6.743339967  | -14.767921646 | 0 | 0 | 0 | # | st  |
| 2739 | 33 | 5 | 2.100000  | 14.611750250 | 6.752417420  | -10.540175727 | 0 | 0 | 0 | # | st  |
| 2740 | 33 | 5 | 2.100000  | 13.704272668 | 12.107497425 | -12.059455955 | 0 | 0 | 0 | # | st  |
| 2741 | 33 | 5 | 2.100000  | 12.110018745 | 6.749404185  | -11.927421788 | 0 | 0 | 0 | # | st  |
| 2742 | 33 | 1 | 1.575000  | 12.890551898 | 9.441957326  | -2.106452507  | 0 | 0 | 0 | # | ao  |
| 2743 | 33 | 1 | 1.575000  | 15.477691886 | 9.431932665  | -6.329552507  | 0 | 0 | 0 | # | ao  |
| 2744 | 33 | 1 | 1.575000  | 10.336075843 | 9.425114554  | -0.757989037  | 0 | 0 | 0 | # | ao  |
| 2745 | 33 | 1 | 1.575000  | 12.923079300 | 9.415126926  | -4.981097695  | 0 | 0 | 0 | # | ao  |
| 2746 | 33 | 2 | 0.425000  | 13.441955855 | 10.809263371 | -6.987748987  | 0 | 0 | 0 | # | ho  |
| 2747 | 33 | 2 | 0.425000  | 10.871522528 | 10.907604153 | -2.718287538  | 0 | 0 | 0 | # | ho  |
| 2748 | 33 | 2 | 0.425000  | 14.943264323 | 7.953309910  | -4.366998978  | 0 | 0 | 0 | # | ho  |
| 2749 | 33 | 2 | 0.425000  | 12.371667415 | 8.047342661  | -0.100174810  | 0 | 0 | 0 | # | ho  |
| 2750 | 33 | 3 | -1.050000 | 12.299920767 | 8.366650650  | -3.540819251  | 0 | 0 | 0 | # | ob  |

|      |    |   |           |               |              |               |   |   |   |     |
|------|----|---|-----------|---------------|--------------|---------------|---|---|---|-----|
| 2751 | 33 | 3 | -1.050000 | 11.914883948  | 8.374565989  | -6.225770135  | 0 | 0 | 0 | ob  |
| 2752 | 33 | 3 | -1.050000 | 14.488420410  | 8.381864470  | -1.992022885  | 0 | 0 | 0 | ob  |
| 2753 | 33 | 3 | -1.050000 | 12.545350450  | 6.129770541  | -4.913787416  | 0 | 0 | 0 | ob  |
| 2754 | 33 | 3 | -1.050000 | 15.129943942  | 6.130571910  | -0.694848299  | 0 | 0 | 0 | ob  |
| 2755 | 33 | 3 | -1.050000 | 10.932205783  | 10.492260884 | -7.769166009  | 0 | 0 | 0 | ob  |
| 2756 | 33 | 3 | -1.050000 | 13.513775495  | 10.490415515 | -3.546748257  | 0 | 0 | 0 | ob  |
| 2757 | 33 | 3 | -1.050000 | 12.681125134  | 12.724043172 | -4.722452555  | 0 | 0 | 0 | ob  |
| 2758 | 33 | 3 | -1.050000 | 15.254542666  | 12.727559909 | -0.494130207  | 0 | 0 | 0 | ob  |
| 2759 | 33 | 3 | -1.050000 | 10.684199510  | 12.726845271 | -6.392656438  | 0 | 0 | 0 | ob  |
| 2760 | 33 | 3 | -1.050000 | 13.268759518  | 12.727122387 | -2.173899070  | 0 | 0 | 0 | ob  |
| 2761 | 33 | 4 | -0.950000 | 11.299417447  | 10.414157382 | -1.993288188  | 0 | 0 | 0 | oh  |
| 2762 | 33 | 4 | -0.950000 | 13.884670440  | 10.401464731 | -6.220340000  | 0 | 0 | 0 | oh  |
| 2763 | 33 | 3 | -1.050000 | 12.694590946  | 12.450593209 | -8.032003882  | 0 | 0 | 0 | ob  |
| 2764 | 33 | 3 | -1.050000 | 15.288875993  | 12.434440270 | -3.800661108  | 0 | 0 | 0 | ob  |
| 2765 | 33 | 4 | -0.950000 | 11.928965723  | 8.455610067  | -0.867370730  | 0 | 0 | 0 | oh  |
| 2766 | 33 | 3 | -1.050000 | 10.525551485  | 6.422246611  | -3.286683302  | 0 | 0 | 0 | ob  |
| 2767 | 33 | 4 | -0.950000 | 14.514576468  | 8.443336781  | -5.093840393  | 0 | 0 | 0 | oh  |
| 2768 | 33 | 3 | -1.050000 | 13.119269734  | 6.406422954  | -7.505235566  | 0 | 0 | 0 | ob  |
| 2769 | 33 | 3 | -1.050000 | 11.325537272  | 10.475258613 | -5.095757722  | 0 | 0 | 0 | ob  |
| 2770 | 33 | 3 | -1.050000 | 13.899085134  | 10.482465238 | -0.861724339  | 0 | 0 | 0 | ob  |
| 2771 | 33 | 3 | -1.050000 | 14.881437623  | 8.364976708  | -7.767860028  | 0 | 0 | 0 | ob  |
| 2772 | 33 | 3 | -1.050000 | 10.559334585  | 6.129733707  | -6.593423632  | 0 | 0 | 0 | ob  |
| 2773 | 33 | 3 | -1.050000 | 13.133287271  | 6.133036431  | -2.365242275  | 0 | 0 | 0 | ob  |
| 2774 | 33 | 5 | 2.100000  | 11.202603477  | 12.104699038 | -4.997113478  | 0 | 0 | 0 | st  |
| 2775 | 33 | 5 | 2.100000  | 13.774629217  | 12.113680341 | -0.769220449  | 0 | 0 | 0 | st  |
| 2776 | 33 | 5 | 2.100000  | 14.697976051  | 6.746036608  | -7.705525016  | 0 | 0 | 0 | st  |
| 2777 | 33 | 5 | 2.100000  | 12.039333961  | 6.743339967  | -6.318321646  | 0 | 0 | 0 | st  |
| 2778 | 33 | 5 | 2.100000  | 14.611750250  | 6.752417420  | -2.090575727  | 0 | 0 | 0 | st  |
| 2779 | 33 | 5 | 2.100000  | 11.115878839  | 12.111149911 | -7.831638849  | 0 | 0 | 0 | st  |
| 2780 | 33 | 5 | 2.100000  | 13.704272668  | 12.107497425 | -3.609855955  | 0 | 0 | 0 | st  |
| 2781 | 33 | 5 | 2.100000  | 12.110018745  | 6.749404185  | -3.477821788  | 0 | 0 | 0 | st  |
| 2782 | 33 | 8 | -0.950000 | 10.915806465  | 12.345584659 | -15.319631379 | 0 | 0 | 0 | oht |
| 2783 | 33 | 6 | 0.425000  | 10.755563167  | 12.462755077 | -16.411736324 | 0 | 0 | 0 | do  |
| 2784 | 33 | 6 | 0.425000  | 15.336389943  | 6.400141026  | -18.650841835 | 0 | 0 | 0 | do  |
| 2785 | 34 | 8 | -0.950000 | -10.684056058 | 6.130571910  | -17.594048299 | 1 | 0 | 0 | oht |
| 2786 | 34 | 1 | 1.575000  | -12.923448102 | 9.441957326  | -10.556052507 | 1 | 0 | 0 | ao  |
| 2787 | 34 | 1 | 1.575000  | -10.336308114 | 9.431932665  | -14.779152507 | 1 | 0 | 0 | ao  |
| 2788 | 34 | 1 | 1.575000  | -15.477924157 | 9.425114554  | -9.207589037  | 1 | 0 | 0 | ao  |
| 2789 | 34 | 1 | 1.575000  | -12.890920700 | 9.415126926  | -13.430697695 | 1 | 0 | 0 | ao  |
| 2790 | 34 | 6 | 0.425000  | -12.372044145 | 10.809263371 | -15.437348987 | 1 | 0 | 0 | do  |
| 2791 | 34 | 2 | 0.425000  | -14.942477472 | 10.907604153 | -11.167887538 | 1 | 0 | 0 | ho  |
| 2792 | 34 | 2 | 0.425000  | -10.870735677 | 7.953309910  | -12.816598978 | 1 | 0 | 0 | ho  |
| 2793 | 34 | 2 | 0.425000  | -13.442332585 | 8.047342661  | -8.549774810  | 1 | 0 | 0 | ho  |
| 2794 | 34 | 3 | -1.050000 | -13.514079233 | 8.366650650  | -11.990419251 | 1 | 0 | 0 | ob  |
| 2795 | 34 | 3 | -1.050000 | -13.899116052 | 8.374565989  | -14.675370135 | 1 | 0 | 0 | ob  |
| 2796 | 34 | 3 | -1.050000 | -11.325579590 | 8.381864470  | -10.441622885 | 1 | 0 | 0 | ob  |
| 2797 | 34 | 3 | -1.050000 | -13.268649550 | 6.129770541  | -13.363387416 | 1 | 0 | 0 | ob  |
| 2798 | 34 | 3 | -1.050000 | -10.684056058 | 6.130571910  | -9.144448299  | 1 | 0 | 0 | ob  |
| 2799 | 34 | 3 | -1.050000 | -12.300224505 | 10.490415515 | -11.996348257 | 1 | 0 | 0 | ob  |
| 2800 | 34 | 3 | -1.050000 | -13.132874866 | 12.724043172 | -13.172052555 | 1 | 0 | 0 | ob  |
| 2801 | 34 | 3 | -1.050000 | -10.559457334 | 12.727559909 | -8.943730207  | 1 | 0 | 0 | ob  |
| 2802 | 34 | 3 | -1.050000 | -12.545240482 | 12.727122387 | -10.623499070 | 1 | 0 | 0 | ob  |
| 2803 | 34 | 4 | -0.950000 | -14.514582553 | 10.414157382 | -10.442888188 | 1 | 0 | 0 | oh  |
| 2804 | 34 | 7 | -0.950000 | -11.929329560 | 10.401464731 | -14.669940000 | 1 | 0 | 0 | oh  |
| 2805 | 34 | 3 | -1.050000 | -10.525124007 | 12.434440270 | -12.250261108 | 1 | 0 | 0 | ob  |
| 2806 | 34 | 4 | -0.950000 | -13.885034277 | 8.455610067  | -9.316970730  | 1 | 0 | 0 | oh  |
| 2807 | 34 | 3 | -1.050000 | -15.288448515 | 6.422246611  | -11.736283302 | 1 | 0 | 0 | ob  |
| 2808 | 34 | 4 | -0.950000 | -11.299423532 | 8.443336781  | -13.543440393 | 1 | 0 | 0 | oh  |
| 2809 | 34 | 3 | -1.050000 | -12.694730266 | 6.406422954  | -15.954835566 | 1 | 0 | 0 | ob  |
| 2810 | 34 | 3 | -1.050000 | -14.488462728 | 10.475258613 | -13.545357722 | 1 | 0 | 0 | ob  |
| 2811 | 34 | 3 | -1.050000 | -11.914914866 | 10.482465238 | -9.311324339  | 1 | 0 | 0 | ob  |
| 2812 | 34 | 3 | -1.050000 | -10.932562377 | 8.364976708  | -16.217460028 | 1 | 0 | 0 | ob  |
| 2813 | 34 | 3 | -1.050000 | -15.254665415 | 6.129733707  | -15.043023632 | 1 | 0 | 0 | ob  |
| 2814 | 34 | 3 | -1.050000 | -12.680712729 | 6.133036431  | -10.814842275 | 1 | 0 | 0 | ob  |
| 2815 | 34 | 5 | 2.100000  | -14.611396523 | 12.104699038 | -13.446713478 | 1 | 0 | 0 | st  |
| 2816 | 34 | 5 | 2.100000  | -12.039370783 | 12.113680341 | -9.218820449  | 1 | 0 | 0 | st  |
| 2817 | 34 | 5 | 2.100000  | -11.116023949 | 6.746036608  | -16.155125016 | 1 | 0 | 0 | st  |
| 2818 | 34 | 5 | 2.100000  | -13.774666039 | 6.743339967  | -14.767921646 | 1 | 0 | 0 | st  |
| 2819 | 34 | 5 | 2.100000  | -11.202249750 | 6.752417420  | -10.540175727 | 1 | 0 | 0 | st  |
| 2820 | 34 | 5 | 2.100000  | -12.109727332 | 12.107497425 | -12.059455955 | 1 | 0 | 0 | st  |
| 2821 | 34 | 5 | 2.100000  | -13.703981255 | 6.749404185  | -11.927421788 | 1 | 0 | 0 | st  |
| 2822 | 34 | 1 | 1.575000  | -12.923448102 | 9.441957326  | -2.106452507  | 1 | 0 | 0 | ao  |
| 2823 | 34 | 1 | 1.575000  | -10.336308114 | 9.431932665  | -6.329552507  | 1 | 0 | 0 | ao  |
| 2824 | 34 | 1 | 1.575000  | -15.477924157 | 9.425114554  | -0.757989037  | 1 | 0 | 0 | ao  |
| 2825 | 34 | 1 | 1.575000  | -12.890920700 | 9.415126926  | -4.981097695  | 1 | 0 | 0 | ao  |
| 2826 | 34 | 2 | 0.425000  | -12.372044145 | 10.809263371 | -6.987748987  | 1 | 0 | 0 | ho  |
| 2827 | 34 | 2 | 0.425000  | -14.942477472 | 10.907604153 | -2.718287538  | 1 | 0 | 0 | ho  |
| 2828 | 34 | 2 | 0.425000  | -10.870735677 | 7.953309910  | -4.366998978  | 1 | 0 | 0 | ho  |
| 2829 | 34 | 2 | 0.425000  | -13.442332585 | 8.047342661  | -0.100174810  | 1 | 0 | 0 | ho  |
| 2830 | 34 | 3 | -1.050000 | -13.514079233 | 8.366650650  | -3.540819251  | 1 | 0 | 0 | ob  |
| 2831 | 34 | 3 | -1.050000 | -13.899116052 | 8.374565989  | -6.225770135  | 1 | 0 | 0 | ob  |
| 2832 | 34 | 3 | -1.050000 | -11.325579590 | 8.381864470  | -1.992022885  | 1 | 0 | 0 | ob  |
| 2833 | 34 | 3 | -1.050000 | -13.268649550 | 6.129770541  | -4.913787416  | 1 | 0 | 0 | ob  |
| 2834 | 34 | 3 | -1.050000 | -10.684056058 | 6.130571910  | -0.694848299  | 1 | 0 | 0 | ob  |
| 2835 | 34 | 3 | -1.050000 | -14.881794217 | 10.492260884 | -7.769166009  | 1 | 0 | 0 | ob  |
| 2836 | 34 | 3 | -1.050000 | -12.300224505 | 10.490415515 | -3.546748257  | 1 | 0 | 0 | ob  |
| 2837 | 34 | 3 | -1.050000 | -13.132874866 | 12.724043172 | -4.722452555  | 1 | 0 | 0 | ob  |
| 2838 | 34 | 3 | -1.050000 | -10.559457334 | 12.727559909 | -0.494130207  | 1 | 0 | 0 | ob  |
| 2839 | 34 | 3 | -1.050000 | -15.129800490 | 12.726845271 | -6.392656438  | 1 | 0 | 0 | ob  |
| 2840 | 34 | 3 | -1.050000 | -12.545240482 | 12.727122387 | -2.173899070  | 1 | 0 | 0 | ob  |
| 2841 | 34 | 4 | -0.950000 | -14.514582553 | 10.414157382 | -1.993288188  | 1 | 0 | 0 | oh  |
| 2842 | 34 | 4 | -0.950000 | -11.929329560 | 10.401464731 | -6.220340000  | 1 | 0 | 0 | oh  |
| 2843 | 34 | 3 | -1.050000 | -13.119409054 | 12.450593209 | -8.032003882  | 1 | 0 | 0 | ob  |

|      |    |   |           |               |              |               |   |   |   |   |     |
|------|----|---|-----------|---------------|--------------|---------------|---|---|---|---|-----|
| 2844 | 34 | 3 | -1.050000 | -10.525124007 | 12.434440270 | -3.800661108  | 1 | 0 | 0 | # | ob  |
| 2845 | 34 | 4 | -0.950000 | -13.885034277 | 8.455610067  | -0.867370730  | 1 | 0 | 0 | # | oh  |
| 2846 | 34 | 3 | -1.050000 | -15.288448515 | 6.422246611  | -3.286683302  | 1 | 0 | 0 | # | ob  |
| 2847 | 34 | 4 | -0.950000 | -11.299423532 | 8.443336781  | -5.093840393  | 1 | 0 | 0 | # | oh  |
| 2848 | 34 | 3 | -1.050000 | -12.694730266 | 6.406422954  | -7.505235566  | 1 | 0 | 0 | # | ob  |
| 2849 | 34 | 3 | -1.050000 | -14.488462728 | 10.475258613 | -5.095757722  | 1 | 0 | 0 | # | ob  |
| 2850 | 34 | 3 | -1.050000 | -11.914914866 | 10.482465238 | -0.861724339  | 1 | 0 | 0 | # | ob  |
| 2851 | 34 | 3 | -1.050000 | -10.932562377 | 8.364976708  | -7.767860028  | 1 | 0 | 0 | # | ob  |
| 2852 | 34 | 3 | -1.050000 | -15.254665415 | 6.129733707  | -6.593423632  | 1 | 0 | 0 | # | ob  |
| 2853 | 34 | 3 | -1.050000 | -12.680712729 | 6.133036431  | -2.365242275  | 1 | 0 | 0 | # | ob  |
| 2854 | 34 | 5 | 2.100000  | -14.611396523 | 12.104699038 | -4.997113478  | 1 | 0 | 0 | # | st  |
| 2855 | 34 | 5 | 2.100000  | -12.039370783 | 12.113680341 | -0.769220449  | 1 | 0 | 0 | # | st  |
| 2856 | 34 | 5 | 2.100000  | -11.116023949 | 6.746036608  | -7.705525016  | 1 | 0 | 0 | # | st  |
| 2857 | 34 | 5 | 2.100000  | -13.774666039 | 6.743339967  | -6.318321646  | 1 | 0 | 0 | # | st  |
| 2858 | 34 | 5 | 2.100000  | -11.202249750 | 6.752417420  | -2.090575727  | 1 | 0 | 0 | # | st  |
| 2859 | 34 | 5 | 2.100000  | -14.698121161 | 12.111149911 | -7.831638849  | 1 | 0 | 0 | # | st  |
| 2860 | 34 | 5 | 2.100000  | -12.109727332 | 12.107497425 | -3.609855955  | 1 | 0 | 0 | # | st  |
| 2861 | 34 | 5 | 2.100000  | -13.703981255 | 6.749404185  | -3.477821788  | 1 | 0 | 0 | # | st  |
| 2862 | 34 | 8 | -0.950000 | -14.898193535 | 12.345584659 | -15.319631379 | 1 | 0 | 0 | # | oht |
| 2863 | 34 | 6 | 0.425000  | -15.058436833 | 12.462755077 | -16.411736324 | 1 | 0 | 0 | # | do  |
| 2864 | 34 | 6 | 0.425000  | -10.477610057 | 6.400141026  | -18.650841835 | 1 | 0 | 0 | # | do  |
| 2865 | 35 | 8 | -0.950000 | -5.521256058  | 6.130571910  | -17.594048299 | 1 | 0 | 0 | # | oht |
| 2866 | 35 | 1 | 1.575000  | -7.760648102  | 9.441957326  | -10.556052507 | 1 | 0 | 0 | # | ao  |
| 2867 | 35 | 1 | 1.575000  | -5.173508114  | 9.431932665  | -14.779152507 | 1 | 0 | 0 | # | ao  |
| 2868 | 35 | 1 | 1.575000  | -10.315124157 | 9.425114554  | -9.207589037  | 1 | 0 | 0 | # | ao  |
| 2869 | 35 | 1 | 1.575000  | -7.728120700  | 9.415126926  | -13.430697695 | 1 | 0 | 0 | # | ao  |
| 2870 | 35 | 6 | 0.425000  | -7.209244145  | 10.809263371 | -15.437348987 | 1 | 0 | 0 | # | do  |
| 2871 | 35 | 2 | 0.425000  | -9.779677472  | 10.907604153 | -11.167887538 | 1 | 0 | 0 | # | ho  |
| 2872 | 35 | 2 | 0.425000  | -5.707935677  | 7.953309910  | -12.816598978 | 1 | 0 | 0 | # | ho  |
| 2873 | 35 | 2 | 0.425000  | -8.279532585  | 8.047342661  | -8.549774810  | 1 | 0 | 0 | # | ho  |
| 2874 | 35 | 3 | -1.050000 | -8.351279233  | 8.366650650  | -11.990419251 | 1 | 0 | 0 | # | ob  |
| 2875 | 35 | 3 | -1.050000 | -8.736316052  | 8.374565989  | -14.675370135 | 1 | 0 | 0 | # | ob  |
| 2876 | 35 | 3 | -1.050000 | -6.162779590  | 8.381864470  | -10.441622885 | 1 | 0 | 0 | # | ob  |
| 2877 | 35 | 3 | -1.050000 | -8.105849550  | 6.129770541  | -13.363387416 | 1 | 0 | 0 | # | ob  |
| 2878 | 35 | 3 | -1.050000 | -5.521256058  | 6.130571910  | -9.144448299  | 1 | 0 | 0 | # | ob  |
| 2879 | 35 | 3 | -1.050000 | -7.137424505  | 10.490415515 | -11.996348257 | 1 | 0 | 0 | # | ob  |
| 2880 | 35 | 3 | -1.050000 | -7.970074866  | 12.724043172 | -13.172052555 | 1 | 0 | 0 | # | ob  |
| 2881 | 35 | 3 | -1.050000 | -5.396657334  | 12.727559909 | -8.943730207  | 1 | 0 | 0 | # | ob  |
| 2882 | 35 | 3 | -1.050000 | -7.382440482  | 12.727122387 | -10.623499070 | 1 | 0 | 0 | # | ob  |
| 2883 | 35 | 4 | -0.950000 | -9.351782553  | 10.414157382 | -10.442888188 | 1 | 0 | 0 | # | oh  |
| 2884 | 35 | 7 | -0.950000 | -6.766529560  | 10.401464731 | -14.669940000 | 1 | 0 | 0 | # | oho |
| 2885 | 35 | 3 | -1.050000 | -5.362324007  | 12.434440270 | -12.250261108 | 1 | 0 | 0 | # | ob  |
| 2886 | 35 | 4 | -0.950000 | -8.722234277  | 8.455610067  | -9.316970730  | 1 | 0 | 0 | # | oh  |
| 2887 | 35 | 3 | -1.050000 | -10.125648515 | 6.422246611  | -11.736283302 | 1 | 0 | 0 | # | ob  |
| 2888 | 35 | 4 | -0.950000 | -6.136623532  | 8.443336781  | -13.543440393 | 1 | 0 | 0 | # | oh  |
| 2889 | 35 | 3 | -1.050000 | -7.531930266  | 6.406422954  | -15.954835566 | 1 | 0 | 0 | # | ob  |
| 2890 | 35 | 3 | -1.050000 | -9.325662728  | 10.475258613 | -13.545357722 | 1 | 0 | 0 | # | ob  |
| 2891 | 35 | 3 | -1.050000 | -6.752114866  | 10.482465238 | -9.311324339  | 1 | 0 | 0 | # | ob  |
| 2892 | 35 | 3 | -1.050000 | -5.769762377  | 8.364976708  | -16.217460028 | 1 | 0 | 0 | # | ob  |
| 2893 | 35 | 3 | -1.050000 | -10.091865415 | 6.129733707  | -15.043023632 | 1 | 0 | 0 | # | ob  |
| 2894 | 35 | 3 | -1.050000 | -7.517912729  | 6.133036431  | -10.814842275 | 1 | 0 | 0 | # | ob  |
| 2895 | 35 | 5 | 2.100000  | -9.448596523  | 12.104699038 | -13.446713478 | 1 | 0 | 0 | # | st  |
| 2896 | 35 | 5 | 2.100000  | -6.876570783  | 12.113680341 | -9.218820449  | 1 | 0 | 0 | # | st  |
| 2897 | 35 | 5 | 2.100000  | -5.953223949  | 6.746036608  | -16.155125016 | 1 | 0 | 0 | # | st  |
| 2898 | 35 | 5 | 2.100000  | -8.611866039  | 6.743339967  | -14.767921646 | 1 | 0 | 0 | # | st  |
| 2899 | 35 | 5 | 2.100000  | -6.039449750  | 6.752417420  | -10.540175727 | 1 | 0 | 0 | # | st  |
| 2900 | 35 | 5 | 2.100000  | -6.946927332  | 12.107497425 | -12.059455955 | 1 | 0 | 0 | # | st  |
| 2901 | 35 | 5 | 2.100000  | -8.541181255  | 6.749404185  | -11.927217788 | 1 | 0 | 0 | # | st  |
| 2902 | 35 | 1 | 1.575000  | -7.760648102  | 9.441957326  | -2.106452507  | 1 | 0 | 0 | # | ao  |
| 2903 | 35 | 1 | 1.575000  | -5.173508114  | 9.431932665  | -6.329552507  | 1 | 0 | 0 | # | ao  |
| 2904 | 35 | 1 | 1.575000  | -10.315124157 | 9.425114554  | -0.757989037  | 1 | 0 | 0 | # | ao  |
| 2905 | 35 | 1 | 1.575000  | -7.728120700  | 9.415126926  | -4.981097695  | 1 | 0 | 0 | # | ao  |
| 2906 | 35 | 2 | 0.425000  | -7.209244145  | 10.809263371 | -6.987748987  | 1 | 0 | 0 | # | ho  |
| 2907 | 35 | 2 | 0.425000  | -9.779677472  | 10.907604153 | -2.718287538  | 1 | 0 | 0 | # | ho  |
| 2908 | 35 | 2 | 0.425000  | -5.707935677  | 7.953309910  | -4.366998978  | 1 | 0 | 0 | # | ho  |
| 2909 | 35 | 2 | 0.425000  | -8.279532585  | 8.047342661  | -0.100174810  | 1 | 0 | 0 | # | ho  |
| 2910 | 35 | 3 | -1.050000 | -8.351279233  | 8.366650650  | -3.540819251  | 1 | 0 | 0 | # | ob  |
| 2911 | 35 | 3 | -1.050000 | -8.736316052  | 8.374565989  | -6.225770135  | 1 | 0 | 0 | # | ob  |
| 2912 | 35 | 3 | -1.050000 | -6.162779590  | 8.381864470  | -1.992022885  | 1 | 0 | 0 | # | ob  |
| 2913 | 35 | 3 | -1.050000 | -8.105849550  | 6.129770541  | -4.913787416  | 1 | 0 | 0 | # | ob  |
| 2914 | 35 | 3 | -1.050000 | -5.521256058  | 6.130571910  | -0.694848299  | 1 | 0 | 0 | # | ob  |
| 2915 | 35 | 3 | -1.050000 | -9.718994217  | 10.492260884 | -7.769166009  | 1 | 0 | 0 | # | ob  |
| 2916 | 35 | 3 | -1.050000 | -7.137424505  | 10.490415515 | -3.546748257  | 1 | 0 | 0 | # | ob  |
| 2917 | 35 | 3 | -1.050000 | -7.970074866  | 12.724043172 | -4.722452555  | 1 | 0 | 0 | # | ob  |
| 2918 | 35 | 3 | -1.050000 | -5.396657334  | 12.727559909 | -0.494130207  | 1 | 0 | 0 | # | ob  |
| 2919 | 35 | 3 | -1.050000 | -9.967000490  | 12.726845271 | -6.392656438  | 1 | 0 | 0 | # | ob  |
| 2920 | 35 | 3 | -1.050000 | -7.382440482  | 12.727122387 | -2.173899070  | 1 | 0 | 0 | # | ob  |
| 2921 | 35 | 4 | -0.950000 | -9.351782553  | 10.414157382 | -1.993288188  | 1 | 0 | 0 | # | oh  |
| 2922 | 35 | 4 | -0.950000 | -6.766529560  | 10.401464731 | -6.220340000  | 1 | 0 | 0 | # | oh  |
| 2923 | 35 | 3 | -1.050000 | -7.956609054  | 12.450593209 | -8.032003882  | 1 | 0 | 0 | # | ob  |
| 2924 | 35 | 3 | -1.050000 | -5.362324007  | 12.434440270 | -3.800661108  | 1 | 0 | 0 | # | ob  |
| 2925 | 35 | 4 | -0.950000 | -8.722234277  | 8.455610067  | -0.867370730  | 1 | 0 | 0 | # | oh  |
| 2926 | 35 | 3 | -1.050000 | -10.125648515 | 6.422246611  | -3.286683302  | 1 | 0 | 0 | # | ob  |
| 2927 | 35 | 4 | -0.950000 | -6.136623532  | 8.443336781  | -5.093840393  | 1 | 0 | 0 | # | oh  |
| 2928 | 35 | 3 | -1.050000 | -7.531930266  | 6.406422954  | -7.505235566  | 1 | 0 | 0 | # | ob  |
| 2929 | 35 | 3 | -1.050000 | -9.325662728  | 10.475258613 | -5.095757722  | 1 | 0 | 0 | # | ob  |
| 2930 | 35 | 3 | -1.050000 | -6.752114866  | 10.482465238 | -0.861724339  | 1 | 0 | 0 | # | ob  |
| 2931 | 35 | 3 | -1.050000 | -5.769762377  | 8.364976708  | -7.767860028  | 1 | 0 | 0 | # | ob  |
| 2932 | 35 | 3 | -1.050000 | -10.091865415 | 6.129733707  | -6.593423632  | 1 | 0 | 0 | # | ob  |
| 2933 | 35 | 3 | -1.050000 | -7.517912729  | 6.133036431  | -2.365242275  | 1 | 0 | 0 | # | ob  |
| 2934 | 35 | 5 | 2.100000  | -9.448596523  | 12.104699038 | -4.997113478  | 1 | 0 | 0 | # | st  |
| 2935 | 35 | 5 | 2.100000  | -6.876570783  | 12.113680341 | -0.769220449  | 1 | 0 | 0 | # | st  |
| 2936 | 35 | 5 | 2.100000  | -5.953223949  | 6.746036608  | -7.705525016  | 1 | 0 | 0 | # | st  |

|      |    |   |           |              |               |               |   |   |   |   |     |
|------|----|---|-----------|--------------|---------------|---------------|---|---|---|---|-----|
| 2937 | 35 | 5 | 2.100000  | -8.611866039 | 6.743339967   | -6.318321646  | 1 | 0 | 0 | # | st  |
| 2938 | 35 | 5 | 2.100000  | -6.039449750 | 6.752417420   | -2.090575727  | 1 | 0 | 0 | # | st  |
| 2939 | 35 | 5 | 2.100000  | -9.535321161 | 12.1111149911 | -7.831638849  | 1 | 0 | 0 | # | st  |
| 2940 | 35 | 5 | 2.100000  | -6.946927332 | 12.107497425  | -3.609855955  | 1 | 0 | 0 | # | st  |
| 2941 | 35 | 5 | 2.100000  | -8.541181255 | 6.749404185   | -3.477821788  | 1 | 0 | 0 | # | st  |
| 2942 | 35 | 8 | -0.950000 | -9.735393535 | 12.345584659  | -15.319631379 | 1 | 0 | 0 | # | oht |
| 2943 | 35 | 6 | 0.425000  | -9.895636833 | 12.462755077  | -16.411736324 | 1 | 0 | 0 | # | do  |
| 2944 | 35 | 6 | 0.425000  | -5.314810057 | 6.400141026   | -18.650841835 | 1 | 0 | 0 | # | do  |
| 2945 | 36 | 8 | -0.950000 | -0.358456058 | 6.130571910   | -17.594048299 | 1 | 0 | 0 | # | oht |
| 2946 | 36 | 1 | 1.575000  | -2.597848102 | 9.441957326   | -10.556052507 | 1 | 0 | 0 | # | ao  |
| 2947 | 36 | 1 | 1.575000  | -0.010708114 | 9.431932665   | -14.779152507 | 1 | 0 | 0 | # | ao  |
| 2948 | 36 | 1 | 1.575000  | -5.152324157 | 9.425114554   | -9.207589037  | 1 | 0 | 0 | # | ao  |
| 2949 | 36 | 1 | 1.575000  | -2.565320700 | 9.415126926   | -13.430697695 | 1 | 0 | 0 | # | ao  |
| 2950 | 36 | 6 | 0.425000  | -2.046444145 | 10.809263371  | -15.437348987 | 1 | 0 | 0 | # | do  |
| 2951 | 36 | 2 | 0.425000  | -4.616877472 | 10.907604153  | -11.167887538 | 1 | 0 | 0 | # | ho  |
| 2952 | 36 | 2 | 0.425000  | -0.545135677 | 7.953309910   | -12.816598978 | 1 | 0 | 0 | # | ho  |
| 2953 | 36 | 2 | 0.425000  | -3.116732585 | 8.047342661   | -8.549774810  | 1 | 0 | 0 | # | ho  |
| 2954 | 36 | 3 | -1.050000 | -3.188479233 | 8.366650650   | -11.990419251 | 1 | 0 | 0 | # | ob  |
| 2955 | 36 | 3 | -1.050000 | -3.573516052 | 8.374565989   | -14.675370135 | 1 | 0 | 0 | # | ob  |
| 2956 | 36 | 3 | -1.050000 | -0.999979590 | 8.381864470   | -10.441622885 | 1 | 0 | 0 | # | ob  |
| 2957 | 36 | 3 | -1.050000 | -2.943049550 | 6.129770541   | -13.363387416 | 1 | 0 | 0 | # | ob  |
| 2958 | 36 | 3 | -1.050000 | -0.358456058 | 6.130571910   | -9.144448299  | 1 | 0 | 0 | # | ob  |
| 2959 | 36 | 3 | -1.050000 | -1.974624505 | 10.490415515  | -11.996348257 | 1 | 0 | 0 | # | ob  |
| 2960 | 36 | 3 | -1.050000 | -2.807274866 | 12.724043172  | -13.172052555 | 1 | 0 | 0 | # | ob  |
| 2961 | 36 | 3 | -1.050000 | -0.233857334 | 12.727559909  | -8.943730207  | 1 | 0 | 0 | # | ob  |
| 2962 | 36 | 3 | -1.050000 | -2.219640482 | 12.727122387  | -10.623499070 | 1 | 0 | 0 | # | ob  |
| 2963 | 36 | 4 | -0.950000 | -4.188982553 | 10.414157382  | -10.442888188 | 1 | 0 | 0 | # | oh  |
| 2964 | 36 | 7 | -0.950000 | -1.603729560 | 10.401464731  | -14.669940000 | 1 | 0 | 0 | # | oho |
| 2965 | 36 | 3 | -1.050000 | -0.199524007 | 12.434440270  | -12.250261108 | 1 | 0 | 0 | # | ob  |
| 2966 | 36 | 4 | -0.950000 | -3.559434277 | 8.455610067   | -9.316970730  | 1 | 0 | 0 | # | oh  |
| 2967 | 36 | 3 | -1.050000 | -4.962848515 | 6.422246611   | -11.736283302 | 1 | 0 | 0 | # | ob  |
| 2968 | 36 | 4 | -0.950000 | -0.973823532 | 8.443336781   | -13.543440393 | 1 | 0 | 0 | # | oh  |
| 2969 | 36 | 3 | -1.050000 | -2.369130266 | 6.406422954   | -15.954835566 | 1 | 0 | 0 | # | ob  |
| 2970 | 36 | 3 | -1.050000 | -4.162862728 | 10.475258613  | -13.545357722 | 1 | 0 | 0 | # | ob  |
| 2971 | 36 | 3 | -1.050000 | -1.589314866 | 10.482465238  | -9.311324339  | 1 | 0 | 0 | # | ob  |
| 2972 | 36 | 3 | -1.050000 | -0.606962377 | 8.364976708   | -16.217460028 | 1 | 0 | 0 | # | ob  |
| 2973 | 36 | 3 | -1.050000 | -4.929065415 | 6.129733707   | -15.043023632 | 1 | 0 | 0 | # | ob  |
| 2974 | 36 | 3 | -1.050000 | -2.355112729 | 6.133036431   | -10.814842275 | 1 | 0 | 0 | # | ob  |
| 2975 | 36 | 5 | 2.100000  | -4.285796523 | 12.104699038  | -13.446713478 | 1 | 0 | 0 | # | st  |
| 2976 | 36 | 5 | 2.100000  | -1.713770783 | 12.113680341  | -9.218820449  | 1 | 0 | 0 | # | st  |
| 2977 | 36 | 5 | 2.100000  | -0.790423949 | 6.746036608   | -16.155125016 | 1 | 0 | 0 | # | st  |
| 2978 | 36 | 5 | 2.100000  | -3.449066039 | 6.743339967   | -14.767921646 | 1 | 0 | 0 | # | st  |
| 2979 | 36 | 5 | 2.100000  | -0.876649750 | 6.752417420   | -10.540175727 | 1 | 0 | 0 | # | st  |
| 2980 | 36 | 5 | 2.100000  | -1.784127332 | 12.107497425  | -12.059455955 | 1 | 0 | 0 | # | st  |
| 2981 | 36 | 5 | 2.100000  | -3.378381255 | 6.749404185   | -11.927421788 | 1 | 0 | 0 | # | st  |
| 2982 | 36 | 1 | 1.575000  | -2.597848102 | 9.441957326   | -2.106452507  | 1 | 0 | 0 | # | ao  |
| 2983 | 36 | 1 | 1.575000  | -0.010708114 | 9.431932665   | -6.329552507  | 1 | 0 | 0 | # | ao  |
| 2984 | 36 | 1 | 1.575000  | -5.152324157 | 9.425114554   | -0.757989037  | 1 | 0 | 0 | # | ao  |
| 2985 | 36 | 1 | 1.575000  | -2.565320700 | 9.415126926   | -4.981097695  | 1 | 0 | 0 | # | ao  |
| 2986 | 36 | 2 | 0.425000  | -2.046444145 | 10.809263371  | -6.987748987  | 1 | 0 | 0 | # | ho  |
| 2987 | 36 | 2 | 0.425000  | -4.616877472 | 10.907604153  | -2.718287538  | 1 | 0 | 0 | # | ho  |
| 2988 | 36 | 2 | 0.425000  | -0.545135677 | 7.953309910   | -4.366998978  | 1 | 0 | 0 | # | ho  |
| 2989 | 36 | 2 | 0.425000  | -3.116732585 | 8.047342661   | -0.100174810  | 1 | 0 | 0 | # | ho  |
| 2990 | 36 | 3 | -1.050000 | -3.188479233 | 8.366650650   | -3.540819251  | 1 | 0 | 0 | # | ob  |
| 2991 | 36 | 3 | -1.050000 | -3.573516052 | 8.374565989   | -6.225770135  | 1 | 0 | 0 | # | ob  |
| 2992 | 36 | 3 | -1.050000 | -0.999979590 | 8.381864470   | -1.992022885  | 1 | 0 | 0 | # | ob  |
| 2993 | 36 | 3 | -1.050000 | -2.943049550 | 6.129770541   | -4.913787416  | 1 | 0 | 0 | # | ob  |
| 2994 | 36 | 3 | -1.050000 | -0.358456058 | 6.130571910   | -0.694848299  | 1 | 0 | 0 | # | ob  |
| 2995 | 36 | 3 | -1.050000 | -4.556194217 | 10.492260884  | -7.769166009  | 1 | 0 | 0 | # | ob  |
| 2996 | 36 | 3 | -1.050000 | -1.974624505 | 10.490415515  | -3.546748257  | 1 | 0 | 0 | # | ob  |
| 2997 | 36 | 3 | -1.050000 | -2.807274866 | 12.724043172  | -4.722452555  | 1 | 0 | 0 | # | ob  |
| 2998 | 36 | 3 | -1.050000 | -0.233857334 | 12.727559909  | -0.494130207  | 1 | 0 | 0 | # | ob  |
| 2999 | 36 | 3 | -1.050000 | -4.804200490 | 12.726845271  | -6.392656438  | 1 | 0 | 0 | # | ob  |
| 3000 | 36 | 3 | -1.050000 | -2.219640482 | 12.727122387  | -2.173899070  | 1 | 0 | 0 | # | ob  |
| 3001 | 36 | 4 | -0.950000 | -4.188982553 | 10.414157382  | -1.993288188  | 1 | 0 | 0 | # | oh  |
| 3002 | 36 | 4 | -0.950000 | -1.603729560 | 10.401464731  | -6.220340000  | 1 | 0 | 0 | # | oh  |
| 3003 | 36 | 3 | -1.050000 | -2.793809054 | 12.450593209  | -8.032003882  | 1 | 0 | 0 | # | ob  |
| 3004 | 36 | 3 | -1.050000 | -0.199524007 | 12.434440270  | -3.800661108  | 1 | 0 | 0 | # | ob  |
| 3005 | 36 | 4 | -0.950000 | -3.559434277 | 8.455610067   | -0.867370730  | 1 | 0 | 0 | # | oh  |
| 3006 | 36 | 3 | -1.050000 | -4.962848515 | 6.422246611   | -3.286683302  | 1 | 0 | 0 | # | ob  |
| 3007 | 36 | 4 | -0.950000 | -0.973823532 | 8.443336781   | -5.093840393  | 1 | 0 | 0 | # | oh  |
| 3008 | 36 | 3 | -1.050000 | -2.369130266 | 6.406422954   | -7.505235566  | 1 | 0 | 0 | # | ob  |
| 3009 | 36 | 3 | -1.050000 | -4.162862728 | 10.475258613  | -5.095757722  | 1 | 0 | 0 | # | ob  |
| 3010 | 36 | 3 | -1.050000 | -1.589314866 | 10.482465238  | -0.861724339  | 1 | 0 | 0 | # | ob  |
| 3011 | 36 | 3 | -1.050000 | -0.606962377 | 8.364976708   | -7.767860028  | 1 | 0 | 0 | # | ob  |
| 3012 | 36 | 3 | -1.050000 | -4.929065415 | 6.129733707   | -6.593423632  | 1 | 0 | 0 | # | ob  |
| 3013 | 36 | 3 | -1.050000 | -2.355112729 | 6.133036431   | -2.365242275  | 1 | 0 | 0 | # | ob  |
| 3014 | 36 | 5 | 2.100000  | -4.285796523 | 12.104699038  | -4.997113478  | 1 | 0 | 0 | # | st  |
| 3015 | 36 | 5 | 2.100000  | -1.713770783 | 12.113680341  | -0.769220449  | 1 | 0 | 0 | # | st  |
| 3016 | 36 | 5 | 2.100000  | -0.790423949 | 6.746036608   | -7.705525016  | 1 | 0 | 0 | # | st  |
| 3017 | 36 | 5 | 2.100000  | -3.449066039 | 6.743339967   | -6.318321646  | 1 | 0 | 0 | # | st  |
| 3018 | 36 | 5 | 2.100000  | -0.876649750 | 6.752417420   | -2.090575727  | 1 | 0 | 0 | # | st  |
| 3019 | 36 | 5 | 2.100000  | -4.372521161 | 12.1111149911 | -7.831638849  | 1 | 0 | 0 | # | st  |
| 3020 | 36 | 5 | 2.100000  | -1.784127332 | 12.107497425  | -3.609855955  | 1 | 0 | 0 | # | st  |
| 3021 | 36 | 5 | 2.100000  | -3.378381255 | 6.749404185   | -3.477821788  | 1 | 0 | 0 | # | st  |
| 3022 | 36 | 8 | -0.950000 | -4.572593535 | 12.345584659  | -15.319631379 | 1 | 0 | 0 | # | oht |
| 3023 | 36 | 6 | 0.425000  | -4.732836833 | 12.462755077  | -16.411736324 | 1 | 0 | 0 | # | do  |
| 3024 | 36 | 6 | 0.425000  | -0.152010057 | 6.400141026   | -18.650841835 | 1 | 0 | 0 | # | do  |
| 3025 | 37 | 8 | -0.950000 | 4.804343942  | 15.514671910  | -17.594048299 | 0 | 0 | 0 | # | oht |
| 3026 | 37 | 1 | 1.575000  | 2.564951898  | -18.710342674 | -10.556052507 | 0 | 1 | 0 | # | ao  |
| 3027 | 37 | 1 | 1.575000  | 5.152091886  | -18.720367335 | -14.779152507 | 0 | 1 | 0 | # | ao  |
| 3028 | 37 | 1 | 1.575000  | 0.010475843  | -18.727185446 | -9.207589037  | 0 | 1 | 0 | # | ao  |
| 3029 | 37 | 1 | 1.575000  | 2.597479300  | -18.737173074 | -13.430697695 | 0 | 1 | 0 | # | ao  |

|      |    |   |           |              |               |               |   |   |   |   |     |
|------|----|---|-----------|--------------|---------------|---------------|---|---|---|---|-----|
| 3030 | 37 | 6 | 0.425000  | 3.116355855  | -17.343036629 | -15.437348987 | 0 | 1 | 0 | # | do  |
| 3031 | 37 | 2 | 0.425000  | 0.545922528  | -17.244695847 | -11.167887538 | 0 | 1 | 0 | # | ho  |
| 3032 | 37 | 2 | 0.425000  | 4.617664323  | 17.337409910  | -12.816598978 | 0 | 0 | 0 | # | ho  |
| 3033 | 37 | 2 | 0.425000  | 2.046067415  | 17.431442661  | -8.549774810  | 0 | 0 | 0 | # | ho  |
| 3034 | 37 | 3 | -1.050000 | 1.974320767  | 17.750750650  | -11.990419251 | 0 | 0 | 0 | # | ob  |
| 3035 | 37 | 3 | -1.050000 | 1.589283948  | 17.758665989  | -14.675370135 | 0 | 0 | 0 | # | ob  |
| 3036 | 37 | 3 | -1.050000 | 4.162820410  | 17.765964470  | -10.441622885 | 0 | 0 | 0 | # | ob  |
| 3037 | 37 | 3 | -1.050000 | 2.219750450  | 15.513870541  | -13.363387416 | 0 | 0 | 0 | # | ob  |
| 3038 | 37 | 3 | -1.050000 | 4.804343942  | 15.514671910  | -9.144448299  | 0 | 0 | 0 | # | ob  |
| 3039 | 37 | 3 | -1.050000 | 3.188175495  | -17.661884485 | -11.996348257 | 0 | 1 | 0 | # | ob  |
| 3040 | 37 | 3 | -1.050000 | 2.355525134  | -15.428256828 | -13.172052555 | 0 | 1 | 0 | # | ob  |
| 3041 | 37 | 3 | -1.050000 | 4.928942666  | -15.424740091 | -8.943730207  | 0 | 1 | 0 | # | ob  |
| 3042 | 37 | 3 | -1.050000 | 2.943159518  | -15.425177613 | -10.623499070 | 0 | 1 | 0 | # | ob  |
| 3043 | 37 | 4 | -0.950000 | 0.973817447  | -17.738142618 | -10.442888188 | 0 | 1 | 0 | # | oh  |
| 3044 | 37 | 7 | -0.950000 | 3.559070440  | -17.750835269 | -14.669940000 | 0 | 1 | 0 | # | oho |
| 3045 | 37 | 3 | -1.050000 | 4.963275993  | -15.717859730 | -12.250261108 | 0 | 1 | 0 | # | ob  |
| 3046 | 37 | 4 | -0.950000 | 1.603365723  | 17.839710067  | -9.316970730  | 0 | 0 | 0 | # | oh  |
| 3047 | 37 | 3 | -1.050000 | 0.199951485  | 15.806346611  | -11.736283302 | 0 | 0 | 0 | # | ob  |
| 3048 | 37 | 4 | -0.950000 | 4.188976468  | 17.827436781  | -13.543440393 | 0 | 0 | 0 | # | oh  |
| 3049 | 37 | 3 | -1.050000 | 2.793669734  | 15.790522954  | -15.954835566 | 0 | 0 | 0 | # | ob  |
| 3050 | 37 | 3 | -1.050000 | 0.999937272  | -17.677041387 | -13.545357722 | 0 | 1 | 0 | # | ob  |
| 3051 | 37 | 3 | -1.050000 | 3.573485134  | -17.669834762 | -9.311324339  | 0 | 1 | 0 | # | ob  |
| 3052 | 37 | 3 | -1.050000 | 4.55837623   | 17.749076708  | -16.217460028 | 0 | 0 | 0 | # | ob  |
| 3053 | 37 | 3 | -1.050000 | 0.233734585  | 15.513833707  | -15.043023632 | 0 | 0 | 0 | # | ob  |
| 3054 | 37 | 3 | -1.050000 | 2.807687271  | 15.517136431  | -10.814842275 | 0 | 0 | 0 | # | ob  |
| 3055 | 37 | 5 | 2.100000  | 0.877003477  | -16.047600962 | -13.446713478 | 0 | 1 | 0 | # | st  |
| 3056 | 37 | 5 | 2.100000  | 3.449029217  | -16.038619659 | -9.218820449  | 0 | 1 | 0 | # | st  |
| 3057 | 37 | 5 | 2.100000  | 4.372376051  | 16.130136608  | -16.155125016 | 0 | 0 | 0 | # | st  |
| 3058 | 37 | 5 | 2.100000  | 1.713733961  | 16.127439967  | -14.767921646 | 0 | 0 | 0 | # | st  |
| 3059 | 37 | 5 | 2.100000  | 4.286150250  | 16.136517420  | -10.540175727 | 0 | 0 | 0 | # | st  |
| 3060 | 37 | 5 | 2.100000  | 3.378672668  | -16.044802575 | -12.059455955 | 0 | 1 | 0 | # | st  |
| 3061 | 37 | 5 | 2.100000  | 1.784418745  | 16.133504185  | -11.927421788 | 0 | 0 | 0 | # | st  |
| 3062 | 37 | 1 | 1.575000  | 2.564951898  | -18.710342674 | -2.106452507  | 0 | 1 | 0 | # | ao  |
| 3063 | 37 | 1 | 1.575000  | 5.152091886  | -18.720367335 | -6.329552507  | 0 | 1 | 0 | # | ao  |
| 3064 | 37 | 1 | 1.575000  | 0.010475843  | -18.727185446 | -0.757989037  | 0 | 1 | 0 | # | ao  |
| 3065 | 37 | 1 | 1.575000  | 2.597479300  | -18.737173074 | -4.981097695  | 0 | 1 | 0 | # | ao  |
| 3066 | 37 | 2 | 0.425000  | 3.116355855  | -17.343036629 | -6.987748987  | 0 | 1 | 0 | # | ho  |
| 3067 | 37 | 2 | 0.425000  | 0.545922528  | -17.244695847 | -2.718287538  | 0 | 1 | 0 | # | ho  |
| 3068 | 37 | 2 | 0.425000  | 4.617664323  | 17.337409910  | -4.366998978  | 0 | 0 | 0 | # | ho  |
| 3069 | 37 | 2 | 0.425000  | 2.046067415  | 17.431442661  | -0.100174810  | 0 | 0 | 0 | # | ho  |
| 3070 | 37 | 3 | -1.050000 | 1.974320767  | 17.750750650  | -3.540819251  | 0 | 0 | 0 | # | ob  |
| 3071 | 37 | 3 | -1.050000 | 1.589283948  | 17.758665989  | -6.225770135  | 0 | 0 | 0 | # | ob  |
| 3072 | 37 | 3 | -1.050000 | 4.162820410  | 17.765964470  | -1.992022885  | 0 | 0 | 0 | # | ob  |
| 3073 | 37 | 3 | -1.050000 | 2.219750450  | 15.513870541  | -4.913787416  | 0 | 0 | 0 | # | ob  |
| 3074 | 37 | 3 | -1.050000 | 4.804343942  | 15.514671910  | -0.694848299  | 0 | 0 | 0 | # | ob  |
| 3075 | 37 | 3 | -1.050000 | 0.606605783  | -17.660039116 | -7.769166009  | 0 | 1 | 0 | # | ob  |
| 3076 | 37 | 3 | -1.050000 | 3.188175495  | -17.661884485 | -3.546748257  | 0 | 1 | 0 | # | ob  |
| 3077 | 37 | 3 | -1.050000 | 2.355525134  | -15.428256828 | -4.722452555  | 0 | 1 | 0 | # | ob  |
| 3078 | 37 | 3 | -1.050000 | 4.928942666  | -15.424740091 | -0.494130207  | 0 | 1 | 0 | # | ob  |
| 3079 | 37 | 3 | -1.050000 | 0.358599510  | -15.425454729 | -6.392656438  | 0 | 1 | 0 | # | ob  |
| 3080 | 37 | 3 | -1.050000 | 2.943159518  | -15.425177613 | -2.173899070  | 0 | 1 | 0 | # | ob  |
| 3081 | 37 | 4 | -0.950000 | 0.973817447  | -17.738142618 | -1.993288188  | 0 | 1 | 0 | # | oh  |
| 3082 | 37 | 4 | -0.950000 | 3.559070440  | -17.750835269 | -6.220340000  | 0 | 1 | 0 | # | oh  |
| 3083 | 37 | 3 | -1.050000 | 2.368990946  | -15.701706791 | -8.032003882  | 0 | 1 | 0 | # | ob  |
| 3084 | 37 | 3 | -1.050000 | 4.963275993  | -15.717859730 | -3.800661108  | 0 | 1 | 0 | # | ob  |
| 3085 | 37 | 4 | -0.950000 | 1.603365723  | 17.839710067  | -0.867370730  | 0 | 0 | 0 | # | oh  |
| 3086 | 37 | 3 | -1.050000 | 0.199951485  | 15.806346611  | -3.286683302  | 0 | 0 | 0 | # | ob  |
| 3087 | 37 | 4 | -0.950000 | 4.188976468  | 17.827436781  | -5.093840393  | 0 | 0 | 0 | # | oh  |
| 3088 | 37 | 3 | -1.050000 | 2.793669734  | 15.790522954  | -7.505235566  | 0 | 0 | 0 | # | ob  |
| 3089 | 37 | 3 | -1.050000 | 0.999937272  | -17.677041387 | -5.095757722  | 0 | 1 | 0 | # | ob  |
| 3090 | 37 | 3 | -1.050000 | 3.573485134  | -17.669834762 | -0.861724339  | 0 | 1 | 0 | # | ob  |
| 3091 | 37 | 3 | -1.050000 | 4.55837623   | 17.749076708  | -7.767860028  | 0 | 0 | 0 | # | ob  |
| 3092 | 37 | 3 | -1.050000 | 0.233734585  | 15.513833707  | -6.593423632  | 0 | 0 | 0 | # | ob  |
| 3093 | 37 | 3 | -1.050000 | 2.807687271  | 15.517136431  | -2.365242275  | 0 | 0 | 0 | # | ob  |
| 3094 | 37 | 5 | 2.100000  | 0.877003477  | -16.047600962 | -4.997113478  | 0 | 1 | 0 | # | st  |
| 3095 | 37 | 5 | 2.100000  | 3.449029217  | -16.038619659 | -0.769220449  | 0 | 1 | 0 | # | st  |
| 3096 | 37 | 5 | 2.100000  | 4.372376051  | 16.130136608  | -7.705525016  | 0 | 0 | 0 | # | st  |
| 3097 | 37 | 5 | 2.100000  | 1.713733961  | 16.127439967  | -6.318321646  | 0 | 0 | 0 | # | st  |
| 3098 | 37 | 5 | 2.100000  | 4.286150250  | 16.136517420  | -2.090575727  | 0 | 0 | 0 | # | st  |
| 3099 | 37 | 5 | 2.100000  | 0.790278839  | -16.041150089 | -7.831638849  | 0 | 1 | 0 | # | st  |
| 3100 | 37 | 5 | 2.100000  | 3.378672668  | -16.044802575 | -3.609855955  | 0 | 1 | 0 | # | st  |
| 3101 | 37 | 5 | 2.100000  | 1.784418745  | 16.133504185  | -3.477821788  | 0 | 0 | 0 | # | st  |
| 3102 | 37 | 8 | -0.950000 | 0.590206465  | -15.806715341 | -15.319631379 | 0 | 1 | 0 | # | oht |
| 3103 | 37 | 6 | 0.425000  | 0.429963167  | -15.689544923 | -16.411736324 | 0 | 1 | 0 | # | do  |
| 3104 | 37 | 6 | 0.425000  | 5.010789943  | 15.784241026  | -18.650841835 | 0 | 0 | 0 | # | do  |
| 3105 | 38 | 8 | -0.950000 | 9.967143942  | 15.514671910  | -17.594048299 | 0 | 0 | 0 | # | oht |
| 3106 | 38 | 1 | 1.575000  | 7.727751898  | -18.710342674 | -10.556052507 | 0 | 1 | 0 | # | ao  |
| 3107 | 38 | 1 | 1.575000  | 10.314891886 | -18.720367335 | -14.779152507 | 0 | 1 | 0 | # | ao  |
| 3108 | 38 | 1 | 1.575000  | 5.173275843  | -18.727185446 | -9.207589037  | 0 | 1 | 0 | # | ao  |
| 3109 | 38 | 1 | 1.575000  | 7.760279300  | -18.737173074 | -13.430697695 | 0 | 1 | 0 | # | ao  |
| 3110 | 38 | 6 | 0.425000  | 8.279155855  | -17.343036629 | -15.437348987 | 0 | 1 | 0 | # | do  |
| 3111 | 38 | 2 | 0.425000  | 5.708722528  | -17.244695847 | -11.167887538 | 0 | 1 | 0 | # | ho  |
| 3112 | 38 | 2 | 0.425000  | 9.780464323  | 17.337409910  | -12.816598978 | 0 | 0 | 0 | # | ho  |
| 3113 | 38 | 2 | 0.425000  | 7.208867415  | 17.431442661  | -8.549774810  | 0 | 0 | 0 | # | ho  |
| 3114 | 38 | 3 | -1.050000 | 7.137120767  | 17.750750650  | -11.990419251 | 0 | 0 | 0 | # | ob  |
| 3115 | 38 | 3 | -1.050000 | 6.752083948  | 17.758665989  | -14.675370135 | 0 | 0 | 0 | # | ob  |
| 3116 | 38 | 3 | -1.050000 | 9.325620410  | 17.765964470  | -10.441622885 | 0 | 0 | 0 | # | ob  |
| 3117 | 38 | 3 | -1.050000 | 7.382550450  | 15.513870541  | -13.363387416 | 0 | 0 | 0 | # | ob  |
| 3118 | 38 | 3 | -1.050000 | 9.967143942  | 15.514671910  | -9.144448299  | 0 | 0 | 0 | # | ob  |
| 3119 | 38 | 3 | -1.050000 | 8.350975495  | -17.661884485 | -11.996348257 | 0 | 1 | 0 | # | ob  |
| 3120 | 38 | 3 | -1.050000 | 7.518325134  | -15.428256828 | -13.172052555 | 0 | 1 | 0 | # | ob  |
| 3121 | 38 | 3 | -1.050000 | 10.091742666 | -15.424740091 | -8.943730207  | 0 | 1 | 0 | # | ob  |
| 3122 | 38 | 3 | -1.050000 | 8.105959518  | -15.425177613 | -10.623499070 | 0 | 1 | 0 | # | ob  |



|      |    |   |           |              |               |               |   |   |   |   |     |
|------|----|---|-----------|--------------|---------------|---------------|---|---|---|---|-----|
| 3123 | 38 | 4 | -0.950000 | 6.136617447  | -17.738142618 | -10.442888188 | 0 | 1 | 0 | # | oh  |
| 3124 | 38 | 7 | -0.950000 | 8.721870440  | -17.750835269 | -14.669940000 | 0 | 1 | 0 | # | oho |
| 3125 | 38 | 3 | -1.050000 | 10.126075993 | -15.717859730 | -12.250261108 | 0 | 1 | 0 | # | ob  |
| 3126 | 38 | 4 | -0.950000 | 6.766165723  | 17.839710067  | -9.316970730  | 0 | 0 | 0 | # | oh  |
| 3127 | 38 | 3 | -1.050000 | 5.362751485  | 15.806346611  | -11.736283302 | 0 | 0 | 0 | # | ob  |
| 3128 | 38 | 4 | -0.950000 | 9.351776468  | 17.827436781  | -13.543440393 | 0 | 0 | 0 | # | oh  |
| 3129 | 38 | 3 | -1.050000 | 7.956469734  | 15.790522954  | -15.954835566 | 0 | 0 | 0 | # | ob  |
| 3130 | 38 | 3 | -1.050000 | 6.162737272  | -17.677041387 | -13.545357722 | 0 | 1 | 0 | # | ob  |
| 3131 | 38 | 3 | -1.050000 | 8.736285134  | -17.669834762 | -9.311324339  | 0 | 1 | 0 | # | ob  |
| 3132 | 38 | 3 | -1.050000 | 9.718637623  | 17.749076708  | -16.217460028 | 0 | 0 | 0 | # | ob  |
| 3133 | 38 | 3 | -1.050000 | 5.396534585  | 15.513833707  | -15.043023632 | 0 | 0 | 0 | # | ob  |
| 3134 | 38 | 3 | -1.050000 | 7.970487271  | 15.517136431  | -10.814842275 | 0 | 0 | 0 | # | ob  |
| 3135 | 38 | 5 | 2.100000  | 6.039803477  | -16.047600962 | -13.446713478 | 0 | 1 | 0 | # | st  |
| 3136 | 38 | 5 | 2.100000  | 8.611829217  | -16.038619659 | -9.218820449  | 0 | 1 | 0 | # | st  |
| 3137 | 38 | 5 | 2.100000  | 9.535176051  | 16.130136608  | -16.155125016 | 0 | 0 | 0 | # | st  |
| 3138 | 38 | 5 | 2.100000  | 6.876533961  | 16.127439967  | -14.767921646 | 0 | 0 | 0 | # | st  |
| 3139 | 38 | 5 | 2.100000  | 9.448950250  | 16.136517420  | -10.540175727 | 0 | 0 | 0 | # | st  |
| 3140 | 38 | 5 | 2.100000  | 8.541472668  | -16.044802575 | -12.059455955 | 0 | 1 | 0 | # | st  |
| 3141 | 38 | 5 | 2.100000  | 6.947218745  | 16.133504185  | -11.927421788 | 0 | 0 | 0 | # | st  |
| 3142 | 38 | 1 | 1.575000  | 7.727751898  | -18.710342674 | -2.106452507  | 0 | 1 | 0 | # | ao  |
| 3143 | 38 | 1 | 1.575000  | 10.314891886 | -18.720367335 | -6.329552507  | 0 | 1 | 0 | # | ao  |
| 3144 | 38 | 1 | 1.575000  | 5.173275843  | -18.727185446 | -0.757989037  | 0 | 1 | 0 | # | ao  |
| 3145 | 38 | 1 | 1.575000  | 7.760279300  | -18.737173074 | -4.981097695  | 0 | 1 | 0 | # | ao  |
| 3146 | 38 | 2 | 0.425000  | 8.279155855  | -17.343036629 | -6.987748987  | 0 | 1 | 0 | # | ho  |
| 3147 | 38 | 2 | 0.425000  | 5.708722528  | -17.244695847 | -2.718287538  | 0 | 1 | 0 | # | ho  |
| 3148 | 38 | 2 | 0.425000  | 9.780464323  | 17.337409910  | -4.366998978  | 0 | 0 | 0 | # | ho  |
| 3149 | 38 | 2 | 0.425000  | 7.208867415  | 17.431442661  | -0.100174810  | 0 | 0 | 0 | # | ho  |
| 3150 | 38 | 3 | -1.050000 | 7.137120767  | 17.750750650  | -3.540819251  | 0 | 0 | 0 | # | ob  |
| 3151 | 38 | 3 | -1.050000 | 6.752083948  | 17.758665989  | -6.225770135  | 0 | 0 | 0 | # | ob  |
| 3152 | 38 | 3 | -1.050000 | 9.325620410  | 17.765964470  | -1.992022885  | 0 | 0 | 0 | # | ob  |
| 3153 | 38 | 3 | -1.050000 | 7.382550450  | 15.513870541  | -4.913787416  | 0 | 0 | 0 | # | ob  |
| 3154 | 38 | 3 | -1.050000 | 9.967143942  | 15.514671910  | -0.694848299  | 0 | 0 | 0 | # | ob  |
| 3155 | 38 | 3 | -1.050000 | 5.769405783  | -17.660039116 | -7.769166009  | 0 | 1 | 0 | # | ob  |
| 3156 | 38 | 3 | -1.050000 | 8.350975495  | -17.661884485 | -3.546748257  | 0 | 1 | 0 | # | ob  |
| 3157 | 38 | 3 | -1.050000 | 7.518325134  | -15.428256828 | -4.722452555  | 0 | 1 | 0 | # | ob  |
| 3158 | 38 | 3 | -1.050000 | 10.091742666 | -15.424740091 | -0.494130207  | 0 | 1 | 0 | # | ob  |
| 3159 | 38 | 3 | -1.050000 | 5.521399510  | -15.425454729 | -6.392656438  | 0 | 1 | 0 | # | ob  |
| 3160 | 38 | 3 | -1.050000 | 8.105959518  | -15.425177613 | -2.173899070  | 0 | 1 | 0 | # | ob  |
| 3161 | 38 | 4 | -0.950000 | 6.136617447  | -17.738142618 | -1.993288188  | 0 | 1 | 0 | # | oh  |
| 3162 | 38 | 4 | -0.950000 | 8.721870440  | -17.750835269 | -6.220340000  | 0 | 1 | 0 | # | oh  |
| 3163 | 38 | 3 | -1.050000 | 7.531790946  | -15.701706791 | -8.032003882  | 0 | 1 | 0 | # | ob  |
| 3164 | 38 | 3 | -1.050000 | 10.126075993 | -15.717859730 | -3.800661108  | 0 | 1 | 0 | # | ob  |
| 3165 | 38 | 4 | -0.950000 | 6.766165723  | 17.839710067  | -0.867370730  | 0 | 0 | 0 | # | oh  |
| 3166 | 38 | 3 | -1.050000 | 5.362751485  | 15.806346611  | -3.286683302  | 0 | 0 | 0 | # | ob  |
| 3167 | 38 | 4 | -0.950000 | 9.351776468  | 17.827436781  | -5.093840393  | 0 | 0 | 0 | # | oh  |
| 3168 | 38 | 3 | -1.050000 | 7.956469734  | 15.790522954  | -7.505235566  | 0 | 0 | 0 | # | ob  |
| 3169 | 38 | 3 | -1.050000 | 6.162737272  | -17.677041387 | -5.095757722  | 0 | 1 | 0 | # | ob  |
| 3170 | 38 | 3 | -1.050000 | 8.736285134  | -17.669834762 | -0.861724339  | 0 | 1 | 0 | # | ob  |
| 3171 | 38 | 3 | -1.050000 | 9.718637623  | 17.749076708  | -7.767860028  | 0 | 0 | 0 | # | ob  |
| 3172 | 38 | 3 | -1.050000 | 5.396534585  | 15.513833707  | -6.593423632  | 0 | 0 | 0 | # | ob  |
| 3173 | 38 | 3 | -1.050000 | 7.970487271  | 15.517136431  | -2.365242275  | 0 | 0 | 0 | # | ob  |
| 3174 | 38 | 5 | 2.100000  | 6.039803477  | -16.047600962 | -4.997113478  | 0 | 1 | 0 | # | st  |
| 3175 | 38 | 5 | 2.100000  | 8.611829217  | -16.038619659 | -0.769220449  | 0 | 1 | 0 | # | st  |
| 3176 | 38 | 5 | 2.100000  | 9.535176051  | 16.130136608  | -7.705525016  | 0 | 0 | 0 | # | st  |
| 3177 | 38 | 5 | 2.100000  | 6.876533961  | 16.127439967  | -6.318321646  | 0 | 0 | 0 | # | st  |
| 3178 | 38 | 5 | 2.100000  | 9.448950250  | 16.136517420  | -2.090575727  | 0 | 0 | 0 | # | st  |
| 3179 | 38 | 5 | 2.100000  | 5.953078839  | -16.041150089 | -7.831638849  | 0 | 1 | 0 | # | st  |
| 3180 | 38 | 5 | 2.100000  | 8.541472668  | -16.044802575 | -3.609855955  | 0 | 1 | 0 | # | st  |
| 3181 | 38 | 5 | 2.100000  | 6.947218745  | 16.133504185  | -3.477821788  | 0 | 0 | 0 | # | st  |
| 3182 | 38 | 8 | -0.950000 | 5.753006465  | -15.806715341 | -15.319631379 | 0 | 1 | 0 | # | oht |
| 3183 | 38 | 6 | 0.425000  | 5.592763167  | -15.689544923 | -16.411736324 | 0 | 1 | 0 | # | do  |
| 3184 | 38 | 6 | 0.425000  | 10.173589943 | 15.784241026  | -18.650841835 | 0 | 0 | 0 | # | do  |
| 3185 | 39 | 8 | -0.950000 | 15.129943942 | 15.514671910  | -17.594048299 | 0 | 0 | 0 | # | oht |
| 3186 | 39 | 1 | 1.575000  | 12.890551898 | -18.710342674 | -10.556052507 | 0 | 1 | 0 | # | ao  |
| 3187 | 39 | 1 | 1.575000  | 15.477691886 | -18.720367335 | -14.779152507 | 0 | 1 | 0 | # | ao  |
| 3188 | 39 | 1 | 1.575000  | 10.336075843 | -18.727185446 | -9.207589037  | 0 | 1 | 0 | # | ao  |
| 3189 | 39 | 1 | 1.575000  | 12.923079300 | -18.737173074 | -13.430697695 | 0 | 1 | 0 | # | ao  |
| 3190 | 39 | 6 | 0.425000  | 13.441955855 | -17.343036629 | -15.437348987 | 0 | 1 | 0 | # | do  |
| 3191 | 39 | 2 | 0.425000  | 10.871522528 | -17.244695847 | -11.167887538 | 0 | 1 | 0 | # | ho  |
| 3192 | 39 | 2 | 0.425000  | 14.943264323 | 17.337409910  | -12.816598978 | 0 | 0 | 0 | # | ho  |
| 3193 | 39 | 2 | 0.425000  | 12.371667415 | 17.431442661  | -8.549774810  | 0 | 0 | 0 | # | ho  |
| 3194 | 39 | 3 | -1.050000 | 12.299920767 | 17.750750650  | -11.990419251 | 0 | 0 | 0 | # | ob  |
| 3195 | 39 | 3 | -1.050000 | 11.914883948 | 17.758665989  | -14.675370135 | 0 | 0 | 0 | # | ob  |
| 3196 | 39 | 3 | -1.050000 | 14.488420410 | 17.765964470  | -10.441622885 | 0 | 0 | 0 | # | ob  |
| 3197 | 39 | 3 | -1.050000 | 12.545350450 | 15.513870541  | -13.363387416 | 0 | 0 | 0 | # | ob  |
| 3198 | 39 | 3 | -1.050000 | 15.129943942 | 15.514671910  | -9.144448299  | 0 | 0 | 0 | # | ob  |
| 3199 | 39 | 3 | -1.050000 | 13.513775495 | -17.661884485 | -11.996348257 | 0 | 1 | 0 | # | ob  |
| 3200 | 39 | 3 | -1.050000 | 12.681125134 | -15.428256828 | -13.172052555 | 0 | 1 | 0 | # | ob  |
| 3201 | 39 | 3 | -1.050000 | 15.254542666 | -15.424740091 | -8.943730207  | 0 | 1 | 0 | # | ob  |
| 3202 | 39 | 3 | -1.050000 | 13.268759518 | -15.425177613 | -10.623499070 | 0 | 1 | 0 | # | ob  |
| 3203 | 39 | 4 | -0.950000 | 11.299417447 | -17.738142618 | -10.442888188 | 0 | 1 | 0 | # | oh  |
| 3204 | 39 | 7 | -0.950000 | 13.884670440 | -17.750835269 | -14.669940000 | 0 | 1 | 0 | # | oho |
| 3205 | 39 | 3 | -1.050000 | 15.288875993 | -15.717859730 | -12.250261108 | 0 | 1 | 0 | # | ob  |
| 3206 | 39 | 4 | -0.950000 | 11.928965723 | 17.839710067  | -9.316970730  | 0 | 0 | 0 | # | oh  |
| 3207 | 39 | 3 | -1.050000 | 10.525551485 | 15.806346611  | -11.736283302 | 0 | 0 | 0 | # | ob  |
| 3208 | 39 | 4 | -0.950000 | 14.514576468 | 17.827436781  | -13.543440393 | 0 | 0 | 0 | # | oh  |
| 3209 | 39 | 3 | -1.050000 | 13.119269734 | 15.790522954  | -15.954835566 | 0 | 0 | 0 | # | ob  |
| 3210 | 39 | 3 | -1.050000 | 11.325537272 | -17.677041387 | -13.545357722 | 0 | 1 | 0 | # | ob  |
| 3211 | 39 | 3 | -1.050000 | 13.899085134 | -17.669834762 | -9.311324339  | 0 | 1 | 0 | # | ob  |
| 3212 | 39 | 3 | -1.050000 | 14.881437623 | 17.749076708  | -16.217460028 | 0 | 0 | 0 | # | ob  |
| 3213 | 39 | 3 | -1.050000 | 10.559334585 | 15.513833707  | -15.043023632 | 0 | 0 | 0 | # | ob  |
| 3214 | 39 | 3 | -1.050000 | 13.133287271 | 15.517136431  | -10.814842275 | 0 | 0 | 0 | # | ob  |
| 3215 | 39 | 5 | 2.100000  | 11.202603477 | -16.047600962 | -13.446713478 | 0 | 1 | 0 | # | st  |

|      |    |   |           |               |               |               |   |   |   |   |     |
|------|----|---|-----------|---------------|---------------|---------------|---|---|---|---|-----|
| 3216 | 39 | 5 | 2.100000  | 13.774629217  | -16.038619659 | -9.218820449  | 0 | 1 | 0 | # | st  |
| 3217 | 39 | 5 | 2.100000  | 14.697976051  | 16.130136608  | -16.155125016 | 0 | 0 | 0 | # | st  |
| 3218 | 39 | 5 | 2.100000  | 12.039333961  | 16.127439967  | -14.767921646 | 0 | 0 | 0 | # | st  |
| 3219 | 39 | 5 | 2.100000  | 14.611750250  | 16.136517420  | -10.540175727 | 0 | 0 | 0 | # | st  |
| 3220 | 39 | 5 | 2.100000  | 13.704272668  | -16.044802575 | -12.059455955 | 0 | 1 | 0 | # | st  |
| 3221 | 39 | 5 | 2.100000  | 12.110018745  | 16.133504185  | -11.927421788 | 0 | 0 | 0 | # | st  |
| 3222 | 39 | 1 | 1.575000  | 12.890551898  | -18.710342674 | -2.106452507  | 0 | 1 | 0 | # | ao  |
| 3223 | 39 | 1 | 1.575000  | 15.477691886  | -18.720367335 | -6.329552507  | 0 | 1 | 0 | # | ao  |
| 3224 | 39 | 1 | 1.575000  | 10.336075843  | -18.727185446 | -0.757989037  | 0 | 1 | 0 | # | ao  |
| 3225 | 39 | 1 | 1.575000  | 12.923079300  | -18.737173074 | -4.981097695  | 0 | 1 | 0 | # | ao  |
| 3226 | 39 | 2 | 0.425000  | 13.441955855  | -17.343036629 | -6.987748987  | 0 | 1 | 0 | # | ho  |
| 3227 | 39 | 2 | 0.425000  | 10.871522528  | -17.244695847 | -2.718287538  | 0 | 1 | 0 | # | ho  |
| 3228 | 39 | 2 | 0.425000  | 14.943264323  | 17.337409910  | -4.366998978  | 0 | 0 | 0 | # | ho  |
| 3229 | 39 | 2 | 0.425000  | 12.371667415  | 17.431442661  | -0.100174810  | 0 | 0 | 0 | # | ho  |
| 3230 | 39 | 3 | -1.050000 | 12.299920767  | 17.750750650  | -3.540819251  | 0 | 0 | 0 | # | ob  |
| 3231 | 39 | 3 | -1.050000 | 11.914883948  | 17.758665989  | -6.225770135  | 0 | 0 | 0 | # | ob  |
| 3232 | 39 | 3 | -1.050000 | 14.488420410  | 17.765964470  | -1.992022885  | 0 | 0 | 0 | # | ob  |
| 3233 | 39 | 3 | -1.050000 | 12.545350450  | 15.513870541  | -4.913787416  | 0 | 0 | 0 | # | ob  |
| 3234 | 39 | 3 | -1.050000 | 15.129943942  | 15.514671910  | -0.694848299  | 0 | 0 | 0 | # | ob  |
| 3235 | 39 | 3 | -1.050000 | 10.932205783  | -17.660039116 | -7.769166009  | 0 | 1 | 0 | # | ob  |
| 3236 | 39 | 3 | -1.050000 | 13.513775495  | -17.661884485 | -3.546748257  | 0 | 1 | 0 | # | ob  |
| 3237 | 39 | 3 | -1.050000 | 12.681125134  | -15.428256828 | -4.722452555  | 0 | 1 | 0 | # | ob  |
| 3238 | 39 | 3 | -1.050000 | 15.254542666  | -15.424740091 | -0.494130207  | 0 | 1 | 0 | # | ob  |
| 3239 | 39 | 3 | -1.050000 | 10.684199510  | -15.425454729 | -6.392656438  | 0 | 1 | 0 | # | ob  |
| 3240 | 39 | 3 | -1.050000 | 13.268759518  | -15.425177613 | -2.173899070  | 0 | 1 | 0 | # | ob  |
| 3241 | 39 | 4 | -0.950000 | 11.299417447  | -17.738142618 | -1.993288188  | 0 | 1 | 0 | # | oh  |
| 3242 | 39 | 4 | -0.950000 | 13.884670440  | -17.750835269 | -6.220340000  | 0 | 1 | 0 | # | oh  |
| 3243 | 39 | 3 | -1.050000 | 12.694590946  | -15.701706791 | -8.032003882  | 0 | 1 | 0 | # | ob  |
| 3244 | 39 | 3 | -1.050000 | 15.288875993  | -15.717859730 | -3.800661108  | 0 | 1 | 0 | # | ob  |
| 3245 | 39 | 4 | -0.950000 | 11.928965723  | 17.839710067  | -0.867370730  | 0 | 0 | 0 | # | oh  |
| 3246 | 39 | 3 | -1.050000 | 10.525551485  | 15.806346611  | -3.286683302  | 0 | 0 | 0 | # | ob  |
| 3247 | 39 | 4 | -0.950000 | 14.514576468  | 17.827436781  | -5.093840393  | 0 | 0 | 0 | # | oh  |
| 3248 | 39 | 3 | -1.050000 | 13.119269734  | 15.790522954  | -7.505235566  | 0 | 0 | 0 | # | ob  |
| 3249 | 39 | 3 | -1.050000 | 11.325537272  | -17.677041387 | -5.095757722  | 0 | 1 | 0 | # | ob  |
| 3250 | 39 | 3 | -1.050000 | 13.899085134  | -17.669834762 | -0.861724339  | 0 | 1 | 0 | # | ob  |
| 3251 | 39 | 3 | -1.050000 | 14.881437623  | 17.749076708  | -7.767860028  | 0 | 0 | 0 | # | ob  |
| 3252 | 39 | 3 | -1.050000 | 10.559334585  | 15.513833707  | -6.593423632  | 0 | 0 | 0 | # | ob  |
| 3253 | 39 | 3 | -1.050000 | 13.133287271  | 15.517136431  | -2.365242275  | 0 | 0 | 0 | # | ob  |
| 3254 | 39 | 5 | 2.100000  | 11.202603477  | -16.047600962 | -4.997113478  | 0 | 1 | 0 | # | st  |
| 3255 | 39 | 5 | 2.100000  | 13.774629217  | -16.038619659 | -0.769220449  | 0 | 1 | 0 | # | st  |
| 3256 | 39 | 5 | 2.100000  | 14.697976051  | 16.130136608  | -7.705525016  | 0 | 0 | 0 | # | st  |
| 3257 | 39 | 5 | 2.100000  | 12.039333961  | 16.127439967  | -6.318321646  | 0 | 0 | 0 | # | st  |
| 3258 | 39 | 5 | 2.100000  | 14.611750250  | 16.136517420  | -2.090575727  | 0 | 0 | 0 | # | st  |
| 3259 | 39 | 5 | 2.100000  | 11.115878839  | -16.041150089 | -7.831638849  | 0 | 1 | 0 | # | st  |
| 3260 | 39 | 5 | 2.100000  | 13.704272668  | -16.044802575 | -3.609855955  | 0 | 1 | 0 | # | st  |
| 3261 | 39 | 5 | 2.100000  | 12.110018745  | 16.133504185  | -3.477821788  | 0 | 0 | 0 | # | st  |
| 3262 | 39 | 8 | -0.950000 | 10.915806465  | -15.806715341 | -15.319631379 | 0 | 1 | 0 | # | oht |
| 3263 | 39 | 6 | 0.425000  | 10.755563167  | -15.689544923 | -16.411736324 | 0 | 1 | 0 | # | do  |
| 3264 | 39 | 6 | 0.425000  | 15.336389943  | 15.784241026  | -18.650841835 | 0 | 0 | 0 | # | do  |
| 3265 | 40 | 8 | -0.950000 | -10.684056058 | 15.514671910  | -17.594048299 | 1 | 0 | 0 | # | oht |
| 3266 | 40 | 1 | 1.575000  | -12.923448102 | -18.710342674 | -10.556052507 | 1 | 1 | 0 | # | ao  |
| 3267 | 40 | 1 | 1.575000  | -10.336308114 | -18.720367335 | -14.779152507 | 1 | 1 | 0 | # | ao  |
| 3268 | 40 | 1 | 1.575000  | -15.477924157 | -18.727185446 | -9.207589037  | 1 | 1 | 0 | # | ao  |
| 3269 | 40 | 1 | 1.575000  | -12.890920700 | -18.737173074 | -13.430697695 | 1 | 1 | 0 | # | ao  |
| 3270 | 40 | 6 | 0.425000  | -12.372044145 | -17.343036629 | -15.437348987 | 1 | 1 | 0 | # | do  |
| 3271 | 40 | 2 | 0.425000  | -14.942477472 | -17.244695847 | -11.167887538 | 1 | 1 | 0 | # | ho  |
| 3272 | 40 | 2 | 0.425000  | -10.870735677 | 17.337409910  | -12.816598978 | 1 | 0 | 0 | # | ho  |
| 3273 | 40 | 2 | 0.425000  | -13.442332585 | 17.431442661  | -8.549774810  | 1 | 0 | 0 | # | ho  |
| 3274 | 40 | 3 | -1.050000 | -13.514079233 | 17.750750650  | -11.990419251 | 1 | 0 | 0 | # | ob  |
| 3275 | 40 | 3 | -1.050000 | -13.899116052 | 17.758665989  | -14.675370135 | 1 | 0 | 0 | # | ob  |
| 3276 | 40 | 3 | -1.050000 | -11.325579590 | 17.765964470  | -10.441622885 | 1 | 0 | 0 | # | ob  |
| 3277 | 40 | 3 | -1.050000 | -13.268649550 | 15.513870541  | -13.363387416 | 1 | 0 | 0 | # | ob  |
| 3278 | 40 | 3 | -1.050000 | -10.684056058 | 15.514671910  | -9.144448299  | 1 | 0 | 0 | # | ob  |
| 3279 | 40 | 3 | -1.050000 | -12.300224505 | -17.661884485 | -11.996348257 | 1 | 1 | 0 | # | ob  |
| 3280 | 40 | 3 | -1.050000 | -13.132874866 | -15.428256828 | -13.172052555 | 1 | 1 | 0 | # | ob  |
| 3281 | 40 | 3 | -1.050000 | -10.559457334 | -15.424740091 | -8.943730207  | 1 | 1 | 0 | # | ob  |
| 3282 | 40 | 3 | -1.050000 | -12.545240482 | -15.425177613 | -10.623499070 | 1 | 1 | 0 | # | ob  |
| 3283 | 40 | 4 | -0.950000 | -14.514582553 | -17.738142618 | -10.442888188 | 1 | 1 | 0 | # | oh  |
| 3284 | 40 | 7 | -0.950000 | -11.929329560 | -17.750835269 | -14.669940000 | 1 | 1 | 0 | # | oht |
| 3285 | 40 | 3 | -1.050000 | -10.525124007 | -15.717859730 | -12.250261108 | 1 | 1 | 0 | # | ob  |
| 3286 | 40 | 4 | -0.950000 | -13.885034277 | 17.839710067  | -9.316970730  | 1 | 0 | 0 | # | oh  |
| 3287 | 40 | 3 | -1.050000 | -15.288448515 | 15.806346611  | -11.736283302 | 1 | 0 | 0 | # | ob  |
| 3288 | 40 | 4 | -0.950000 | -11.299423532 | 17.827436781  | -13.543440393 | 1 | 0 | 0 | # | oh  |
| 3289 | 40 | 3 | -1.050000 | -12.694730266 | 15.790522954  | -15.954835566 | 1 | 0 | 0 | # | ob  |
| 3290 | 40 | 3 | -1.050000 | -14.488462728 | -17.677041387 | -13.545357722 | 1 | 1 | 0 | # | ob  |
| 3291 | 40 | 3 | -1.050000 | -11.914914866 | -17.669834762 | -9.311324339  | 1 | 1 | 0 | # | ob  |
| 3292 | 40 | 3 | -1.050000 | -10.932562377 | 17.749076708  | -16.217460028 | 1 | 0 | 0 | # | ob  |
| 3293 | 40 | 3 | -1.050000 | -15.254665415 | 15.513833707  | -15.043023632 | 1 | 0 | 0 | # | ob  |
| 3294 | 40 | 3 | -1.050000 | -12.680712729 | 15.517136431  | -10.814842275 | 1 | 0 | 0 | # | ob  |
| 3295 | 40 | 5 | 2.100000  | -14.611396523 | -16.047600962 | -13.446713478 | 1 | 1 | 0 | # | st  |
| 3296 | 40 | 5 | 2.100000  | -12.039370783 | -16.038619659 | -9.218820449  | 1 | 1 | 0 | # | st  |
| 3297 | 40 | 5 | 2.100000  | -11.116023949 | 16.130136608  | -16.155125016 | 1 | 1 | 0 | # | st  |
| 3298 | 40 | 5 | 2.100000  | -13.774666039 | 16.127439967  | -14.767921646 | 1 | 0 | 0 | # | st  |
| 3299 | 40 | 5 | 2.100000  | -11.202249750 | 16.136517420  | -10.540175727 | 1 | 0 | 0 | # | st  |
| 3300 | 40 | 5 | 2.100000  | -12.109727332 | -16.044802575 | -12.059455955 | 1 | 1 | 0 | # | st  |
| 3301 | 40 | 5 | 2.100000  | -13.703981255 | 16.133504185  | -11.927421788 | 1 | 0 | 0 | # | st  |
| 3302 | 40 | 1 | 1.575000  | -12.923448102 | -18.710342674 | -2.106452507  | 1 | 1 | 0 | # | ao  |
| 3303 | 40 | 1 | 1.575000  | -10.336308114 | -18.720367335 | -6.329552507  | 1 | 1 | 0 | # | ao  |
| 3304 | 40 | 1 | 1.575000  | -15.477924157 | -18.727185446 | -9.207589037  | 1 | 1 | 0 | # | ao  |
| 3305 | 40 | 1 | 1.575000  | -12.890920700 | -18.737173074 | -13.430697695 | 1 | 1 | 0 | # | ao  |
| 3306 | 40 | 2 | 0.425000  | -12.372044145 | -17.343036629 | -6.987748987  | 1 | 1 | 0 | # | ho  |
| 3307 | 40 | 2 | 0.425000  | -14.942477472 | -17.244695847 | -2.718287538  | 1 | 1 | 0 | # | ho  |
| 3308 | 40 | 2 | 0.425000  | -10.870735677 | 17.337409910  | -4.366998978  | 1 | 0 | 0 | # | ho  |

|      |    |   |           |               |               |               |   |   |   |   |     |
|------|----|---|-----------|---------------|---------------|---------------|---|---|---|---|-----|
| 3309 | 40 | 2 | 0.425000  | -13.442332585 | 17.431442661  | -0.100174810  | 1 | 0 | 0 | # | ho  |
| 3310 | 40 | 3 | -1.050000 | -13.514079233 | 17.750750650  | -3.540819251  | 1 | 0 | 0 | # | ob  |
| 3311 | 40 | 3 | -1.050000 | -13.899116052 | 17.758665989  | -6.225770135  | 1 | 0 | 0 | # | ob  |
| 3312 | 40 | 3 | -1.050000 | -11.325579590 | 17.765964470  | -1.992022885  | 1 | 0 | 0 | # | ob  |
| 3313 | 40 | 3 | -1.050000 | -13.268649550 | 15.513870541  | -4.913787416  | 1 | 0 | 0 | # | ob  |
| 3314 | 40 | 3 | -1.050000 | -10.684056058 | 15.514671910  | -0.694848299  | 1 | 0 | 0 | # | ob  |
| 3315 | 40 | 3 | -1.050000 | -14.881794217 | -17.660039116 | -7.769166009  | 1 | 1 | 0 | # | ob  |
| 3316 | 40 | 3 | -1.050000 | -12.300224505 | -17.661884485 | -3.546748257  | 1 | 1 | 0 | # | ob  |
| 3317 | 40 | 3 | -1.050000 | -13.132874866 | -15.428256828 | -4.722452555  | 1 | 1 | 0 | # | ob  |
| 3318 | 40 | 3 | -1.050000 | -10.559457334 | -15.424740091 | -0.494130207  | 1 | 1 | 0 | # | ob  |
| 3319 | 40 | 3 | -1.050000 | -15.129800490 | -15.425454729 | -6.392656438  | 1 | 1 | 0 | # | ob  |
| 3320 | 40 | 3 | -1.050000 | -12.545240482 | -15.425177613 | -2.173899070  | 1 | 1 | 0 | # | ob  |
| 3321 | 40 | 4 | -0.950000 | -14.514582553 | -17.738142618 | -1.993288188  | 1 | 1 | 0 | # | oh  |
| 3322 | 40 | 4 | -0.950000 | -11.929329560 | -17.750835269 | -6.220340000  | 1 | 1 | 0 | # | oh  |
| 3323 | 40 | 3 | -1.050000 | -13.119409054 | -15.701706791 | -8.032003882  | 1 | 1 | 0 | # | ob  |
| 3324 | 40 | 3 | -1.050000 | -10.525124007 | -15.717859730 | -3.800661108  | 1 | 1 | 0 | # | ob  |
| 3325 | 40 | 4 | -0.950000 | -13.885034277 | 17.839710067  | -0.867370730  | 1 | 0 | 0 | # | oh  |
| 3326 | 40 | 3 | -1.050000 | -15.288448515 | 15.806346611  | -3.286683302  | 1 | 0 | 0 | # | ob  |
| 3327 | 40 | 4 | -0.950000 | -11.299423532 | 17.827436781  | -5.093840393  | 1 | 0 | 0 | # | oh  |
| 3328 | 40 | 3 | -1.050000 | -12.694730266 | 15.790522954  | -7.505235566  | 1 | 0 | 0 | # | ob  |
| 3329 | 40 | 3 | -1.050000 | -14.488462728 | -17.677041387 | -5.095757722  | 1 | 1 | 0 | # | ob  |
| 3330 | 40 | 3 | -1.050000 | -11.914914866 | -17.669834762 | -0.861724339  | 1 | 1 | 0 | # | ob  |
| 3331 | 40 | 3 | -1.050000 | -10.932562377 | 17.749076708  | -7.767860028  | 1 | 0 | 0 | # | ob  |
| 3332 | 40 | 3 | -1.050000 | -15.254665415 | 15.513833707  | -6.593423632  | 1 | 0 | 0 | # | ob  |
| 3333 | 40 | 3 | -1.050000 | -12.680712729 | 15.517136431  | -2.365242275  | 1 | 0 | 0 | # | ob  |
| 3334 | 40 | 5 | 2.100000  | -14.611396523 | -16.047600962 | -4.997113478  | 1 | 1 | 0 | # | st  |
| 3335 | 40 | 5 | 2.100000  | -12.039370783 | -16.038619659 | -0.769220449  | 1 | 1 | 0 | # | st  |
| 3336 | 40 | 5 | 2.100000  | -11.116023949 | 16.130136608  | -7.705525016  | 1 | 0 | 0 | # | st  |
| 3337 | 40 | 5 | 2.100000  | -13.774666039 | 16.127439967  | -6.318321646  | 1 | 0 | 0 | # | st  |
| 3338 | 40 | 5 | 2.100000  | -11.202249750 | 16.136517420  | -2.090575727  | 1 | 0 | 0 | # | st  |
| 3339 | 40 | 5 | 2.100000  | -14.698121161 | -16.041150089 | -7.831638849  | 1 | 1 | 0 | # | st  |
| 3340 | 40 | 5 | 2.100000  | -12.109727332 | -16.044802575 | -3.609859555  | 1 | 1 | 0 | # | st  |
| 3341 | 40 | 5 | 2.100000  | -13.703981255 | 16.133504185  | -3.477821788  | 1 | 0 | 0 | # | st  |
| 3342 | 40 | 8 | -0.950000 | -14.898193535 | -15.806715341 | -15.319631379 | 1 | 1 | 0 | # | oht |
| 3343 | 40 | 6 | 0.425000  | -15.058436833 | -15.689544923 | -16.411736324 | 1 | 1 | 0 | # | do  |
| 3344 | 40 | 6 | 0.425000  | -10.477610057 | 15.784241026  | -18.650841835 | 1 | 0 | 0 | # | do  |
| 3345 | 41 | 8 | -0.950000 | -5.521256058  | 15.514671910  | -17.594048299 | 1 | 0 | 0 | # | oht |
| 3346 | 41 | 1 | 1.575000  | -7.760648102  | -18.710342674 | -10.556052507 | 1 | 1 | 0 | # | ao  |
| 3347 | 41 | 1 | 1.575000  | -5.173508114  | -18.720367335 | -14.779152507 | 1 | 1 | 0 | # | ao  |
| 3348 | 41 | 1 | 1.575000  | -10.315124157 | -18.727185446 | -9.207589037  | 1 | 1 | 0 | # | ao  |
| 3349 | 41 | 1 | 1.575000  | -7.728120700  | -18.737173074 | -13.430697695 | 1 | 1 | 0 | # | ao  |
| 3350 | 41 | 6 | 0.425000  | -7.209244145  | -17.343036629 | -15.437348987 | 1 | 1 | 0 | # | do  |
| 3351 | 41 | 2 | 0.425000  | -9.779677472  | -17.244695847 | -11.167887538 | 1 | 1 | 0 | # | ho  |
| 3352 | 41 | 2 | 0.425000  | -5.707935677  | 17.337409910  | -12.816598978 | 1 | 0 | 0 | # | ho  |
| 3353 | 41 | 2 | 0.425000  | -8.279532585  | 17.431442661  | -8.549774810  | 1 | 0 | 0 | # | ho  |
| 3354 | 41 | 3 | -1.050000 | -8.351279233  | 17.750750650  | -11.990419251 | 1 | 0 | 0 | # | ob  |
| 3355 | 41 | 3 | -1.050000 | -8.736316052  | 17.758665989  | -14.675370135 | 1 | 0 | 0 | # | ob  |
| 3356 | 41 | 3 | -1.050000 | -6.162779590  | 17.765964470  | -10.441622885 | 1 | 0 | 0 | # | ob  |
| 3357 | 41 | 3 | -1.050000 | -8.105849550  | 15.513870541  | -13.363387416 | 1 | 0 | 0 | # | ob  |
| 3358 | 41 | 3 | -1.050000 | -5.521256058  | 15.514671910  | -9.144448299  | 1 | 0 | 0 | # | ob  |
| 3359 | 41 | 3 | -1.050000 | -7.137424505  | -17.661884485 | -11.996348257 | 1 | 1 | 0 | # | ob  |
| 3360 | 41 | 3 | -1.050000 | -7.970074866  | -15.428256828 | -13.172052555 | 1 | 1 | 0 | # | ob  |
| 3361 | 41 | 3 | -1.050000 | -5.396657334  | -15.424740091 | -8.943730207  | 1 | 1 | 0 | # | ob  |
| 3362 | 41 | 3 | -1.050000 | -7.382440482  | -15.425177613 | -10.623499070 | 1 | 1 | 0 | # | ob  |
| 3363 | 41 | 4 | -0.950000 | -9.351782553  | -17.738142618 | -10.442888188 | 1 | 1 | 0 | # | oh  |
| 3364 | 41 | 7 | -0.950000 | -6.766529560  | -17.750835269 | -14.669940000 | 1 | 1 | 0 | # | oho |
| 3365 | 41 | 3 | -1.050000 | -5.362324007  | -15.717859730 | -12.250261108 | 1 | 1 | 0 | # | ob  |
| 3366 | 41 | 4 | -0.950000 | -8.722234277  | 17.839710067  | -9.316970730  | 1 | 0 | 0 | # | oh  |
| 3367 | 41 | 3 | -1.050000 | -10.125648515 | 15.806346611  | -11.736283302 | 1 | 0 | 0 | # | ob  |
| 3368 | 41 | 4 | -0.950000 | -6.136623532  | 17.827436781  | -13.543440393 | 1 | 0 | 0 | # | oh  |
| 3369 | 41 | 3 | -1.050000 | -7.531930266  | 15.790522954  | -15.954835566 | 1 | 0 | 0 | # | ob  |
| 3370 | 41 | 3 | -1.050000 | -9.325662728  | -17.677041387 | -13.545357722 | 1 | 1 | 0 | # | ob  |
| 3371 | 41 | 3 | -1.050000 | -6.752114866  | -17.669834762 | -9.311324339  | 1 | 1 | 0 | # | ob  |
| 3372 | 41 | 3 | -1.050000 | -5.769762377  | 17.749076708  | -16.217460028 | 1 | 0 | 0 | # | ob  |
| 3373 | 41 | 3 | -1.050000 | -10.091865415 | 15.513833707  | -15.043023632 | 1 | 0 | 0 | # | ob  |
| 3374 | 41 | 3 | -1.050000 | -7.517912729  | 15.517136431  | -10.814842275 | 1 | 0 | 0 | # | ob  |
| 3375 | 41 | 5 | 2.100000  | -9.448596523  | -16.047600962 | -13.446713478 | 1 | 1 | 0 | # | st  |
| 3376 | 41 | 5 | 2.100000  | -6.876570783  | -16.038619659 | -9.218820449  | 1 | 1 | 0 | # | st  |
| 3377 | 41 | 5 | 2.100000  | -5.953223949  | 16.130136608  | -16.155125016 | 1 | 0 | 0 | # | st  |
| 3378 | 41 | 5 | 2.100000  | -8.611866039  | 16.127439967  | -14.767921646 | 1 | 0 | 0 | # | st  |
| 3379 | 41 | 5 | 2.100000  | -6.039449750  | 16.136517420  | -10.540175727 | 1 | 0 | 0 | # | st  |
| 3380 | 41 | 5 | 2.100000  | -6.946927332  | -16.044802575 | -12.059455955 | 1 | 1 | 0 | # | st  |
| 3381 | 41 | 5 | 2.100000  | -8.541181255  | 16.133504185  | -11.927421788 | 1 | 0 | 0 | # | st  |
| 3382 | 41 | 1 | 1.575000  | -7.760648102  | -18.710342674 | -2.106452507  | 1 | 1 | 0 | # | ao  |
| 3383 | 41 | 1 | 1.575000  | -5.173508114  | -18.720367335 | -6.329552507  | 1 | 1 | 0 | # | ao  |
| 3384 | 41 | 1 | 1.575000  | -10.315124157 | -18.727185446 | -0.757989037  | 1 | 1 | 0 | # | ao  |
| 3385 | 41 | 1 | 1.575000  | -7.728120700  | -18.737173074 | -4.981097695  | 1 | 1 | 0 | # | ao  |
| 3386 | 41 | 2 | 0.425000  | -7.209244145  | -17.343036629 | -6.987748987  | 1 | 1 | 0 | # | ho  |
| 3387 | 41 | 2 | 0.425000  | -9.779677472  | -17.244695847 | -2.718287538  | 1 | 1 | 0 | # | ho  |
| 3388 | 41 | 2 | 0.425000  | -5.707935677  | 17.337409910  | -4.366998978  | 1 | 0 | 0 | # | ho  |
| 3389 | 41 | 2 | 0.425000  | -8.279532585  | 17.431442661  | -0.100174810  | 1 | 0 | 0 | # | ho  |
| 3390 | 41 | 3 | -1.050000 | -8.351279233  | 17.750750650  | -3.540819251  | 1 | 0 | 0 | # | ob  |
| 3391 | 41 | 3 | -1.050000 | -8.736316052  | 17.758665989  | -6.225770135  | 1 | 0 | 0 | # | ob  |
| 3392 | 41 | 3 | -1.050000 | -6.162779590  | 17.765964470  | -1.992022885  | 1 | 0 | 0 | # | ob  |
| 3393 | 41 | 3 | -1.050000 | -8.105849550  | 15.513870541  | -4.913787416  | 1 | 0 | 0 | # | ob  |
| 3394 | 41 | 3 | -1.050000 | -5.521256058  | 15.514671910  | -0.694848299  | 1 | 0 | 0 | # | ob  |
| 3395 | 41 | 3 | -1.050000 | -9.718994217  | -17.660039116 | -7.769166009  | 1 | 1 | 0 | # | ob  |
| 3396 | 41 | 3 | -1.050000 | -7.137424505  | -17.661884485 | -3.546748257  | 1 | 1 | 0 | # | ob  |
| 3397 | 41 | 3 | -1.050000 | -7.970074866  | -15.428256828 | -4.722452555  | 1 | 1 | 0 | # | ob  |
| 3398 | 41 | 3 | -1.050000 | -5.396657334  | -15.424740091 | -0.494130207  | 1 | 1 | 0 | # | ob  |
| 3399 | 41 | 3 | -1.050000 | -9.967000490  | -15.425454729 | -6.392656438  | 1 | 1 | 0 | # | ob  |
| 3400 | 41 | 3 | -1.050000 | -7.382440482  | -15.425177613 | -2.173899070  | 1 | 1 | 0 | # | ob  |
| 3401 | 41 | 4 | -0.950000 | -9.351782553  | -17.738142618 | -1.993288188  | 1 | 1 | 0 | # | oh  |

|      |    |   |           |               |               |               |   |   |   |   |     |
|------|----|---|-----------|---------------|---------------|---------------|---|---|---|---|-----|
| 3402 | 41 | 4 | -0.950000 | -6.766529560  | -17.750835269 | -6.220340000  | 1 | 1 | 0 | # | oh  |
| 3403 | 41 | 3 | -1.050000 | -7.956609054  | -15.701706791 | -8.032003882  | 1 | 1 | 0 | # | ob  |
| 3404 | 41 | 3 | -1.050000 | -5.362324007  | -15.717859730 | -3.800661108  | 1 | 1 | 0 | # | ob  |
| 3405 | 41 | 4 | -0.950000 | -8.722234277  | 17.839710067  | -0.867370730  | 1 | 0 | 0 | # | oh  |
| 3406 | 41 | 3 | -1.050000 | -10.125648515 | 15.806346611  | -3.286683302  | 1 | 0 | 0 | # | ob  |
| 3407 | 41 | 4 | -0.950000 | -6.136623532  | 17.827436781  | -5.093840393  | 1 | 0 | 0 | # | oh  |
| 3408 | 41 | 3 | -1.050000 | -7.531930266  | 15.790522954  | -7.505235566  | 1 | 0 | 0 | # | ob  |
| 3409 | 41 | 3 | -1.050000 | -9.325662728  | -17.677041387 | -5.095757722  | 1 | 1 | 0 | # | ob  |
| 3410 | 41 | 3 | -1.050000 | -6.752114866  | -17.669834762 | -0.861724339  | 1 | 1 | 0 | # | ob  |
| 3411 | 41 | 3 | -1.050000 | -5.769762377  | 17.749076708  | -7.767860028  | 1 | 0 | 0 | # | ob  |
| 3412 | 41 | 3 | -1.050000 | -10.091865415 | 15.513833707  | -6.593423632  | 1 | 0 | 0 | # | ob  |
| 3413 | 41 | 3 | -1.050000 | -7.517912729  | 15.517136431  | -2.365242275  | 1 | 0 | 0 | # | ob  |
| 3414 | 41 | 5 | 2.100000  | -9.448596523  | -16.047600962 | -4.997113478  | 1 | 1 | 0 | # | st  |
| 3415 | 41 | 5 | 2.100000  | -6.876570783  | -16.038619659 | -0.769220449  | 1 | 1 | 0 | # | st  |
| 3416 | 41 | 5 | 2.100000  | -5.953223949  | 16.130136608  | -7.705525016  | 1 | 0 | 0 | # | st  |
| 3417 | 41 | 5 | 2.100000  | -8.611866039  | 16.127439967  | -6.318321646  | 1 | 0 | 0 | # | st  |
| 3418 | 41 | 5 | 2.100000  | -6.039449750  | 16.136517420  | -2.090575727  | 1 | 0 | 0 | # | st  |
| 3419 | 41 | 5 | 2.100000  | -9.535321161  | -16.041150089 | -7.831638849  | 1 | 1 | 0 | # | st  |
| 3420 | 41 | 5 | 2.100000  | -6.946927332  | -16.044802575 | -3.609855955  | 1 | 1 | 0 | # | st  |
| 3421 | 41 | 5 | 2.100000  | -8.541181255  | 16.133504185  | -3.477821788  | 1 | 0 | 0 | # | st  |
| 3422 | 41 | 8 | -0.950000 | -9.735393535  | -15.806715341 | -15.319631379 | 1 | 1 | 0 | # | oht |
| 3423 | 41 | 6 | 0.425000  | -9.895636833  | -15.689544923 | -16.411736324 | 1 | 1 | 0 | # | do  |
| 3424 | 41 | 6 | 0.425000  | -5.314810057  | 15.784241026  | -18.650841835 | 1 | 0 | 0 | # | do  |
| 3425 | 42 | 8 | -0.950000 | -0.358456058  | 15.514671910  | -17.594048299 | 1 | 0 | 0 | # | oht |
| 3426 | 42 | 1 | 1.575000  | -2.597848102  | -18.710342674 | -10.556052507 | 1 | 1 | 0 | # | ao  |
| 3427 | 42 | 1 | 1.575000  | -0.010708114  | -18.720367335 | -14.779152507 | 1 | 1 | 0 | # | ao  |
| 3428 | 42 | 1 | 1.575000  | -5.152324157  | -18.727185446 | -9.207589037  | 1 | 1 | 0 | # | ao  |
| 3429 | 42 | 1 | 1.575000  | -2.565320700  | -18.737173074 | -13.430697695 | 1 | 1 | 0 | # | ao  |
| 3430 | 42 | 6 | 0.425000  | -2.046444145  | -17.343036629 | -15.437348987 | 1 | 1 | 0 | # | do  |
| 3431 | 42 | 2 | 0.425000  | -4.616877472  | -17.244695847 | -11.167887538 | 1 | 1 | 0 | # | ho  |
| 3432 | 42 | 2 | 0.425000  | -0.545135677  | 17.337409910  | -12.816598978 | 1 | 0 | 0 | # | ho  |
| 3433 | 42 | 2 | 0.425000  | -3.116732585  | 17.431442661  | -8.549774810  | 1 | 0 | 0 | # | ho  |
| 3434 | 42 | 3 | -1.050000 | -3.188479233  | 17.750750650  | -11.990419251 | 1 | 0 | 0 | # | ob  |
| 3435 | 42 | 3 | -1.050000 | -3.573516052  | 17.758665989  | -14.675370135 | 1 | 0 | 0 | # | ob  |
| 3436 | 42 | 3 | -1.050000 | -0.999979590  | 17.765964470  | -10.441622885 | 1 | 0 | 0 | # | ob  |
| 3437 | 42 | 3 | -1.050000 | -2.943049550  | 15.513870541  | -13.363387416 | 1 | 0 | 0 | # | ob  |
| 3438 | 42 | 3 | -1.050000 | -0.358456058  | 15.514671910  | -9.144448299  | 1 | 0 | 0 | # | ob  |
| 3439 | 42 | 3 | -1.050000 | -1.974624505  | -17.661884485 | -11.996348257 | 1 | 1 | 0 | # | ob  |
| 3440 | 42 | 3 | -1.050000 | -2.807274866  | -15.428256828 | -13.172052555 | 1 | 1 | 0 | # | ob  |
| 3441 | 42 | 3 | -1.050000 | -0.233857334  | -15.424740091 | -8.943730207  | 1 | 1 | 0 | # | ob  |
| 3442 | 42 | 3 | -1.050000 | -2.219640482  | -15.425177613 | -10.623499070 | 1 | 1 | 0 | # | ob  |
| 3443 | 42 | 4 | -0.950000 | -4.188982553  | -17.738142618 | -10.442888188 | 1 | 1 | 0 | # | oh  |
| 3444 | 42 | 7 | -0.950000 | -1.603729560  | -17.750835269 | -14.669940000 | 1 | 1 | 0 | # | oho |
| 3445 | 42 | 3 | -1.050000 | -0.199524007  | -15.717859730 | -12.250261108 | 1 | 1 | 0 | # | ob  |
| 3446 | 42 | 4 | -0.950000 | -3.559434277  | 17.839710067  | -9.316970730  | 1 | 0 | 0 | # | oh  |
| 3447 | 42 | 3 | -1.050000 | -4.962848515  | 15.806346611  | -11.736283302 | 1 | 0 | 0 | # | ob  |
| 3448 | 42 | 4 | -0.950000 | -0.973823532  | 17.827436781  | -13.543440393 | 1 | 0 | 0 | # | oh  |
| 3449 | 42 | 3 | -1.050000 | -2.369130266  | 15.790522954  | -15.954835566 | 1 | 0 | 0 | # | ob  |
| 3450 | 42 | 3 | -1.050000 | -4.162862728  | -17.677041387 | -13.545357722 | 1 | 1 | 0 | # | ob  |
| 3451 | 42 | 3 | -1.050000 | -1.589314866  | -17.669834762 | -9.311324339  | 1 | 1 | 0 | # | ob  |
| 3452 | 42 | 3 | -1.050000 | -0.606962377  | 17.749076708  | -16.217460028 | 1 | 0 | 0 | # | ob  |
| 3453 | 42 | 3 | -1.050000 | -4.929065415  | 15.513833707  | -15.043023632 | 1 | 0 | 0 | # | ob  |
| 3454 | 42 | 3 | -1.050000 | -2.355112729  | 15.517136431  | -10.814842275 | 1 | 0 | 0 | # | ob  |
| 3455 | 42 | 5 | 2.100000  | -4.285796523  | -16.047600962 | -13.446713478 | 1 | 1 | 0 | # | st  |
| 3456 | 42 | 5 | 2.100000  | -1.713770783  | -16.038619659 | -9.218820449  | 1 | 1 | 0 | # | st  |
| 3457 | 42 | 5 | 2.100000  | -0.790423949  | 16.130136608  | -16.155125016 | 1 | 0 | 0 | # | st  |
| 3458 | 42 | 5 | 2.100000  | -3.449066039  | 16.127439967  | -14.767921646 | 1 | 0 | 0 | # | st  |
| 3459 | 42 | 5 | 2.100000  | -0.876649750  | 16.136517420  | -10.540175727 | 1 | 0 | 0 | # | st  |
| 3460 | 42 | 5 | 2.100000  | -1.784127332  | -16.044802575 | -12.059455955 | 1 | 1 | 0 | # | st  |
| 3461 | 42 | 5 | 2.100000  | -3.378381255  | 16.133504185  | -11.927421788 | 1 | 0 | 0 | # | st  |
| 3462 | 42 | 1 | 1.575000  | -2.597848102  | -18.710342674 | -2.106452507  | 1 | 1 | 0 | # | ao  |
| 3463 | 42 | 1 | 1.575000  | -0.010708114  | -18.720367335 | -6.329552507  | 1 | 1 | 0 | # | ao  |
| 3464 | 42 | 1 | 1.575000  | -5.152324157  | -18.727185446 | -0.757989037  | 1 | 1 | 0 | # | ao  |
| 3465 | 42 | 1 | 1.575000  | -2.565320700  | -18.737173074 | -4.981097695  | 1 | 1 | 0 | # | ao  |
| 3466 | 42 | 2 | 0.425000  | -2.046444145  | -17.343036629 | -6.987748987  | 1 | 1 | 0 | # | ho  |
| 3467 | 42 | 2 | 0.425000  | -4.616877472  | -17.244695847 | -2.718287538  | 1 | 1 | 0 | # | ho  |
| 3468 | 42 | 2 | 0.425000  | -0.545135677  | 17.337409910  | -4.366998978  | 1 | 0 | 0 | # | ho  |
| 3469 | 42 | 2 | 0.425000  | -3.116732585  | 17.431442661  | -0.100174810  | 1 | 0 | 0 | # | ho  |
| 3470 | 42 | 3 | -1.050000 | -3.188479233  | 17.750750650  | -3.540819251  | 1 | 0 | 0 | # | ob  |
| 3471 | 42 | 3 | -1.050000 | -3.573516052  | 17.758665989  | -6.225770135  | 1 | 0 | 0 | # | ob  |
| 3472 | 42 | 3 | -1.050000 | -0.999979590  | 17.765964470  | -1.992022885  | 1 | 0 | 0 | # | ob  |
| 3473 | 42 | 3 | -1.050000 | -2.943049550  | 15.513870541  | -4.913787416  | 1 | 0 | 0 | # | ob  |
| 3474 | 42 | 3 | -1.050000 | -0.358456058  | 15.514671910  | -0.694848299  | 1 | 0 | 0 | # | ob  |
| 3475 | 42 | 3 | -1.050000 | -4.556194217  | -17.660039116 | -7.769166009  | 1 | 1 | 0 | # | ob  |
| 3476 | 42 | 3 | -1.050000 | -1.974624505  | -17.661884485 | -3.546748257  | 1 | 1 | 0 | # | ob  |
| 3477 | 42 | 3 | -1.050000 | -2.807274866  | -15.428256828 | -4.722452555  | 1 | 1 | 0 | # | ob  |
| 3478 | 42 | 3 | -1.050000 | -0.233857334  | -15.424740091 | -0.494130207  | 1 | 1 | 0 | # | ob  |
| 3479 | 42 | 3 | -1.050000 | -4.804200490  | -15.425454729 | -6.392656438  | 1 | 1 | 0 | # | ob  |
| 3480 | 42 | 3 | -1.050000 | -2.219640482  | -15.425177613 | -2.173899070  | 1 | 1 | 0 | # | ob  |
| 3481 | 42 | 4 | -0.950000 | -4.188982553  | -17.738142618 | -1.993288188  | 1 | 1 | 0 | # | oh  |
| 3482 | 42 | 4 | -0.950000 | -1.603729560  | -17.750835269 | -6.220340000  | 1 | 1 | 0 | # | oh  |
| 3483 | 42 | 3 | -1.050000 | -2.793809054  | -15.701706791 | -8.032003882  | 1 | 1 | 0 | # | ob  |
| 3484 | 42 | 3 | -1.050000 | -0.199524007  | -15.717859730 | -3.800661108  | 1 | 1 | 0 | # | ob  |
| 3485 | 42 | 4 | -0.950000 | -3.559434277  | 17.839710067  | -0.867370730  | 1 | 0 | 0 | # | oh  |
| 3486 | 42 | 3 | -1.050000 | -4.962848515  | 15.806346611  | -3.286683302  | 1 | 0 | 0 | # | ob  |
| 3487 | 42 | 4 | -0.950000 | -0.973823532  | 17.827436781  | -5.093840393  | 1 | 0 | 0 | # | oh  |
| 3488 | 42 | 3 | -1.050000 | -2.369130266  | 15.790522954  | -7.505235566  | 1 | 0 | 0 | # | ob  |
| 3489 | 42 | 3 | -1.050000 | -4.162862728  | -17.677041387 | -5.095757722  | 1 | 1 | 0 | # | ob  |
| 3490 | 42 | 3 | -1.050000 | -1.589314866  | -17.669834762 | -0.861724339  | 1 | 1 | 0 | # | ob  |
| 3491 | 42 | 3 | -1.050000 | -0.606962377  | 17.749076708  | -7.767860028  | 1 | 0 | 0 | # | ob  |
| 3492 | 42 | 3 | -1.050000 | -4.929065415  | 15.513833707  | -6.593423632  | 1 | 0 | 0 | # | ob  |
| 3493 | 42 | 3 | -1.050000 | -2.355112729  | 15.517136431  | -2.365242275  | 1 | 0 | 0 | # | ob  |
| 3494 | 42 | 5 | 2.100000  | -4.285796523  | -16.047600962 | -4.997113478  | 1 | 1 | 0 | # | st  |

|      |    |   |           |              |               |               |   |   |   |   |     |
|------|----|---|-----------|--------------|---------------|---------------|---|---|---|---|-----|
| 3495 | 42 | 5 | 2.100000  | -1.713770783 | -16.038619659 | -0.769220449  | 1 | 1 | 0 | # | st  |
| 3496 | 42 | 5 | 2.100000  | -0.790423949 | 16.130136608  | -7.705525016  | 1 | 0 | 0 | # | st  |
| 3497 | 42 | 5 | 2.100000  | -3.449066039 | 16.127439967  | -6.318321646  | 1 | 0 | 0 | # | st  |
| 3498 | 42 | 5 | 2.100000  | -0.876649750 | 16.136517420  | -2.090575727  | 1 | 0 | 0 | # | st  |
| 3499 | 42 | 5 | 2.100000  | -4.372521161 | -16.041150089 | -7.831638849  | 1 | 1 | 0 | # | st  |
| 3500 | 42 | 5 | 2.100000  | -1.784127332 | -16.044802575 | -3.609855955  | 1 | 1 | 0 | # | st  |
| 3501 | 42 | 5 | 2.100000  | -3.378381255 | 16.133504185  | -3.477821788  | 1 | 0 | 0 | # | st  |
| 3502 | 42 | 8 | -0.950000 | -4.572593535 | -15.806715341 | -15.319631379 | 1 | 1 | 0 | # | oht |
| 3503 | 42 | 6 | 0.425000  | -4.732836833 | -15.689544923 | -16.411736324 | 1 | 1 | 0 | # | do  |
| 3504 | 42 | 6 | 0.425000  | -0.152010057 | 15.784241026  | -18.650841835 | 1 | 0 | 0 | # | do  |
| 3505 | 43 | 8 | -0.950000 | 4.804343942  | -12.637628090 | -17.594048299 | 0 | 1 | 0 | # | oht |
| 3506 | 43 | 1 | 1.575000  | 2.564951898  | -9.326242674  | -10.556052507 | 0 | 1 | 0 | # | ao  |
| 3507 | 43 | 1 | 1.575000  | 5.152091886  | -9.336267335  | -14.779152507 | 0 | 1 | 0 | # | ao  |
| 3508 | 43 | 1 | 1.575000  | 0.010475843  | -9.343085446  | -9.207589037  | 0 | 1 | 0 | # | ao  |
| 3509 | 43 | 1 | 1.575000  | 2.597479300  | -9.353073074  | -13.430697695 | 0 | 1 | 0 | # | ao  |
| 3510 | 43 | 6 | 0.425000  | 3.116355855  | -7.958936629  | -15.437348987 | 0 | 1 | 0 | # | do  |
| 3511 | 43 | 2 | 0.425000  | 0.545922528  | -7.860595847  | -11.167887538 | 0 | 1 | 0 | # | ho  |
| 3512 | 43 | 2 | 0.425000  | 4.617664323  | -10.814890090 | -12.816598978 | 0 | 1 | 0 | # | ho  |
| 3513 | 43 | 2 | 0.425000  | 2.046067415  | -10.720857339 | -8.549774810  | 0 | 1 | 0 | # | ho  |
| 3514 | 43 | 3 | -1.050000 | 1.974320767  | -10.401549350 | -11.990419251 | 0 | 1 | 0 | # | ob  |
| 3515 | 43 | 3 | -1.050000 | 1.589283948  | -10.393634011 | -14.675370135 | 0 | 1 | 0 | # | ob  |
| 3516 | 43 | 3 | -1.050000 | 4.162820410  | -10.386335530 | -10.441622885 | 0 | 1 | 0 | # | ob  |
| 3517 | 43 | 3 | -1.050000 | 2.219750450  | -12.638429459 | -13.363387416 | 0 | 1 | 0 | # | ob  |
| 3518 | 43 | 3 | -1.050000 | 4.804343942  | -12.637628090 | -9.144448299  | 0 | 1 | 0 | # | ob  |
| 3519 | 43 | 3 | -1.050000 | 3.188175495  | -8.277784485  | -11.996348257 | 0 | 1 | 0 | # | ob  |
| 3520 | 43 | 3 | -1.050000 | 2.355525134  | -6.044156828  | -13.172052555 | 0 | 1 | 0 | # | ob  |
| 3521 | 43 | 3 | -1.050000 | 4.928942666  | -6.040640091  | -8.943730207  | 0 | 1 | 0 | # | ob  |
| 3522 | 43 | 3 | -1.050000 | 2.943159518  | -6.041077613  | -10.623499070 | 0 | 1 | 0 | # | ob  |
| 3523 | 43 | 4 | -0.950000 | 0.973817447  | -8.354042618  | -10.442888188 | 0 | 1 | 0 | # | oh  |
| 3524 | 43 | 7 | -0.950000 | 3.559070440  | -8.366735269  | -14.669940000 | 0 | 1 | 0 | # | oho |
| 3525 | 43 | 3 | -1.050000 | 4.963275993  | -6.333759730  | -12.250261108 | 0 | 1 | 0 | # | ob  |
| 3526 | 43 | 4 | -0.950000 | 1.603365723  | -10.312589933 | -9.316970730  | 0 | 1 | 0 | # | oh  |
| 3527 | 43 | 3 | -1.050000 | 0.199951485  | -12.345953389 | -11.736283302 | 0 | 1 | 0 | # | ob  |
| 3528 | 43 | 4 | -0.950000 | 4.188976468  | -10.324863219 | -13.543440393 | 0 | 1 | 0 | # | oh  |
| 3529 | 43 | 3 | -1.050000 | 2.793669734  | -12.361777046 | -15.954835566 | 0 | 1 | 0 | # | ob  |
| 3530 | 43 | 3 | -1.050000 | 0.999937272  | -8.292941387  | -13.545357722 | 0 | 1 | 0 | # | ob  |
| 3531 | 43 | 3 | -1.050000 | 3.573485134  | -8.285734762  | -9.311324339  | 0 | 1 | 0 | # | ob  |
| 3532 | 43 | 3 | -1.050000 | 4.555837623  | -10.403223292 | -16.217460028 | 0 | 1 | 0 | # | ob  |
| 3533 | 43 | 3 | -1.050000 | 0.233734585  | -12.638466293 | -15.043023632 | 0 | 1 | 0 | # | ob  |
| 3534 | 43 | 3 | -1.050000 | 2.807687271  | -12.635163569 | -10.814842275 | 0 | 1 | 0 | # | ob  |
| 3535 | 43 | 5 | 2.100000  | 0.877003477  | -6.663500962  | -13.446713478 | 0 | 1 | 0 | # | st  |
| 3536 | 43 | 5 | 2.100000  | 3.449029217  | -6.654519659  | -9.218820449  | 0 | 1 | 0 | # | st  |
| 3537 | 43 | 5 | 2.100000  | 4.372376051  | -12.022163392 | -16.155125016 | 0 | 1 | 0 | # | st  |
| 3538 | 43 | 5 | 2.100000  | 1.713733961  | -12.024860033 | -14.767921646 | 0 | 1 | 0 | # | st  |
| 3539 | 43 | 5 | 2.100000  | 4.286150250  | -12.015782580 | -10.540175727 | 0 | 1 | 0 | # | st  |
| 3540 | 43 | 5 | 2.100000  | 3.378672668  | -6.660702575  | -12.059455955 | 0 | 1 | 0 | # | st  |
| 3541 | 43 | 5 | 2.100000  | 1.784418745  | -12.018795815 | -11.927421788 | 0 | 1 | 0 | # | st  |
| 3542 | 43 | 1 | 1.575000  | 2.564951898  | -9.326242674  | -2.106452507  | 0 | 1 | 0 | # | ao  |
| 3543 | 43 | 1 | 1.575000  | 5.152091886  | -9.336267335  | -6.329552507  | 0 | 1 | 0 | # | ao  |
| 3544 | 43 | 1 | 1.575000  | 0.010475843  | -9.343085446  | -0.757989037  | 0 | 1 | 0 | # | ao  |
| 3545 | 43 | 1 | 1.575000  | 2.597479300  | -9.353073074  | -4.981097695  | 0 | 1 | 0 | # | ao  |
| 3546 | 43 | 2 | 0.425000  | 3.116355855  | -7.958936629  | -6.987748987  | 0 | 1 | 0 | # | ho  |
| 3547 | 43 | 2 | 0.425000  | 0.545922528  | -7.860595847  | -2.718287538  | 0 | 1 | 0 | # | ho  |
| 3548 | 43 | 2 | 0.425000  | 4.617664323  | -10.814890090 | -4.366998978  | 0 | 1 | 0 | # | ho  |
| 3549 | 43 | 2 | 0.425000  | 2.046067415  | -10.720857339 | -0.100174810  | 0 | 1 | 0 | # | ho  |
| 3550 | 43 | 3 | -1.050000 | 1.974320767  | -10.401549350 | -3.540819251  | 0 | 1 | 0 | # | ob  |
| 3551 | 43 | 3 | -1.050000 | 1.589283948  | -10.393634011 | -6.225770135  | 0 | 1 | 0 | # | ob  |
| 3552 | 43 | 3 | -1.050000 | 4.162820410  | -10.386335530 | -1.992022885  | 0 | 1 | 0 | # | ob  |
| 3553 | 43 | 3 | -1.050000 | 2.219750450  | -12.638429459 | -4.913787416  | 0 | 1 | 0 | # | ob  |
| 3554 | 43 | 3 | -1.050000 | 4.804343942  | -12.637628090 | -0.694848299  | 0 | 1 | 0 | # | ob  |
| 3555 | 43 | 3 | -1.050000 | 0.606605783  | -8.275939116  | -7.769166009  | 0 | 1 | 0 | # | ob  |
| 3556 | 43 | 3 | -1.050000 | 3.188175495  | -8.277784485  | -3.546748257  | 0 | 1 | 0 | # | ob  |
| 3557 | 43 | 3 | -1.050000 | 2.355525134  | -6.044156828  | -4.722452555  | 0 | 1 | 0 | # | ob  |
| 3558 | 43 | 3 | -1.050000 | 4.928942666  | -6.040640091  | -0.494130207  | 0 | 1 | 0 | # | ob  |
| 3559 | 43 | 3 | -1.050000 | 0.358599510  | -6.041354729  | -6.392656438  | 0 | 1 | 0 | # | ob  |
| 3560 | 43 | 3 | -1.050000 | 2.943159518  | -6.041077613  | -2.173899070  | 0 | 1 | 0 | # | ob  |
| 3561 | 43 | 4 | -0.950000 | 0.973817447  | -8.354042618  | -1.993288188  | 0 | 1 | 0 | # | oh  |
| 3562 | 43 | 4 | -0.950000 | 3.559070440  | -8.366735269  | -6.220340000  | 0 | 1 | 0 | # | oh  |
| 3563 | 43 | 3 | -1.050000 | 2.368990946  | -6.317606791  | -8.032003882  | 0 | 1 | 0 | # | ob  |
| 3564 | 43 | 3 | -1.050000 | 4.963275993  | -6.333759730  | -3.800661108  | 0 | 1 | 0 | # | ob  |
| 3565 | 43 | 4 | -0.950000 | 1.603365723  | -10.312589933 | -0.867370730  | 0 | 1 | 0 | # | oh  |
| 3566 | 43 | 3 | -1.050000 | 0.199951485  | -12.345953389 | -3.286683302  | 0 | 1 | 0 | # | ob  |
| 3567 | 43 | 4 | -0.950000 | 4.188976468  | -10.324863219 | -5.093840393  | 0 | 1 | 0 | # | oh  |
| 3568 | 43 | 3 | -1.050000 | 2.793669734  | -12.361777046 | -7.505235566  | 0 | 1 | 0 | # | ob  |
| 3569 | 43 | 3 | -1.050000 | 0.999937272  | -8.292941387  | -5.095757722  | 0 | 1 | 0 | # | ob  |
| 3570 | 43 | 3 | -1.050000 | 3.573485134  | -8.285734762  | -0.861724339  | 0 | 1 | 0 | # | ob  |
| 3571 | 43 | 3 | -1.050000 | 4.555837623  | -10.403223292 | -7.767860028  | 0 | 1 | 0 | # | ob  |
| 3572 | 43 | 3 | -1.050000 | 0.233734585  | -12.638466293 | -6.593423632  | 0 | 1 | 0 | # | ob  |
| 3573 | 43 | 3 | -1.050000 | 2.807687271  | -12.635163569 | -2.365242275  | 0 | 1 | 0 | # | ob  |
| 3574 | 43 | 5 | 2.100000  | 0.877003477  | -6.663500962  | -4.997113478  | 0 | 1 | 0 | # | st  |
| 3575 | 43 | 5 | 2.100000  | 3.449029217  | -6.654519659  | -0.769220449  | 0 | 1 | 0 | # | st  |
| 3576 | 43 | 5 | 2.100000  | 4.372376051  | -12.022163392 | -7.705525016  | 0 | 1 | 0 | # | st  |
| 3577 | 43 | 5 | 2.100000  | 1.713733961  | -12.024860033 | -6.318321646  | 0 | 1 | 0 | # | st  |
| 3578 | 43 | 5 | 2.100000  | 4.286150250  | -12.015782580 | -2.090575727  | 0 | 1 | 0 | # | st  |
| 3579 | 43 | 5 | 2.100000  | 0.790423949  | -16.130136608 | -7.831638849  | 0 | 1 | 0 | # | st  |
| 3580 | 43 | 5 | 2.100000  | 3.378672668  | -6.660702575  | -3.609855955  | 0 | 1 | 0 | # | st  |
| 3581 | 43 | 5 | 2.100000  | 1.784418745  | -12.018795815 | -3.477821788  | 0 | 1 | 0 | # | st  |
| 3582 | 43 | 8 | -0.950000 | 0.590206465  | -6.422615341  | -15.319631379 | 0 | 1 | 0 | # | oht |
| 3583 | 43 | 6 | 0.425000  | 0.429963167  | -6.305444923  | -16.411736324 | 0 | 1 | 0 | # | do  |
| 3584 | 43 | 6 | 0.425000  | 5.010789943  | -12.368058974 | -18.650841835 | 0 | 1 | 0 | # | do  |
| 3585 | 44 | 8 | -0.950000 | 9.967143942  | -12.637628090 | -17.594048299 | 0 | 1 | 0 | # | oht |
| 3586 | 44 | 1 | 1.575000  | 7.727751898  | -9.326242674  | -10.556052507 | 0 | 1 | 0 | # | ao  |
| 3587 | 44 | 1 | 1.575000  | 10.314891886 | -9.336267335  | -14.779152507 | 0 | 1 | 0 | # | ao  |

|      |    |   |           |              |               |               |   |   |   |   |     |
|------|----|---|-----------|--------------|---------------|---------------|---|---|---|---|-----|
| 3588 | 44 | 1 | 1.575000  | 5.173275843  | -9.343085446  | -9.207589037  | 0 | 1 | 0 | # | ao  |
| 3589 | 44 | 1 | 1.575000  | 7.760279300  | -9.353073074  | -13.430697695 | 0 | 1 | 0 | # | ao  |
| 3590 | 44 | 6 | 0.425000  | 8.279155855  | -7.958936629  | -15.437348987 | 0 | 1 | 0 | # | do  |
| 3591 | 44 | 2 | 0.425000  | 5.708722528  | -7.860595847  | -11.167887538 | 0 | 1 | 0 | # | ho  |
| 3592 | 44 | 2 | 0.425000  | 9.780464323  | -10.814890090 | -12.816598978 | 0 | 1 | 0 | # | ho  |
| 3593 | 44 | 2 | 0.425000  | 7.208867415  | -10.720857339 | -8.549774810  | 0 | 1 | 0 | # | ho  |
| 3594 | 44 | 3 | -1.050000 | 7.137120767  | -10.401549350 | -11.990419251 | 0 | 1 | 0 | # | ob  |
| 3595 | 44 | 3 | -1.050000 | 6.752083948  | -10.393634011 | -14.675370135 | 0 | 1 | 0 | # | ob  |
| 3596 | 44 | 3 | -1.050000 | 9.325620410  | -10.386335530 | -10.441622885 | 0 | 1 | 0 | # | ob  |
| 3597 | 44 | 3 | -1.050000 | 7.382550450  | -12.638429459 | -13.363387416 | 0 | 1 | 0 | # | ob  |
| 3598 | 44 | 3 | -1.050000 | 9.967143942  | -12.637628090 | -9.144448299  | 0 | 1 | 0 | # | ob  |
| 3599 | 44 | 3 | -1.050000 | 8.350975495  | -8.277784485  | -11.996348257 | 0 | 1 | 0 | # | ob  |
| 3600 | 44 | 3 | -1.050000 | 7.518325134  | -6.044156828  | -13.172052555 | 0 | 1 | 0 | # | ob  |
| 3601 | 44 | 3 | -1.050000 | 10.091742666 | -6.040640091  | -8.943730207  | 0 | 1 | 0 | # | ob  |
| 3602 | 44 | 3 | -1.050000 | 8.105959518  | -6.041077613  | -10.623499070 | 0 | 1 | 0 | # | ob  |
| 3603 | 44 | 4 | -0.950000 | 6.136617447  | -8.354042618  | -10.442888188 | 0 | 1 | 0 | # | oh  |
| 3604 | 44 | 7 | -0.950000 | 8.721870440  | -8.366735269  | -14.669940000 | 0 | 1 | 0 | # | oho |
| 3605 | 44 | 3 | -1.050000 | 10.126075993 | -6.333759730  | -12.250261108 | 0 | 1 | 0 | # | ob  |
| 3606 | 44 | 4 | -0.950000 | 6.766165723  | -10.312589933 | -9.316970730  | 0 | 1 | 0 | # | oh  |
| 3607 | 44 | 3 | -1.050000 | 5.362751485  | -12.345953389 | -11.736283302 | 0 | 1 | 0 | # | ob  |
| 3608 | 44 | 4 | -0.950000 | 9.351776468  | -10.324863219 | -13.543440393 | 0 | 1 | 0 | # | oh  |
| 3609 | 44 | 3 | -1.050000 | 7.956469734  | -12.361777046 | -15.954835566 | 0 | 1 | 0 | # | ob  |
| 3610 | 44 | 3 | -1.050000 | 6.162737272  | -8.292941387  | -13.545357722 | 0 | 1 | 0 | # | ob  |
| 3611 | 44 | 3 | -1.050000 | 8.736285134  | -8.285734762  | -9.311324339  | 0 | 1 | 0 | # | ob  |
| 3612 | 44 | 3 | -1.050000 | 9.718637623  | -10.403223292 | -16.217460028 | 0 | 1 | 0 | # | ob  |
| 3613 | 44 | 3 | -1.050000 | 5.396534585  | -12.638466293 | -15.043023632 | 0 | 1 | 0 | # | ob  |
| 3614 | 44 | 3 | -1.050000 | 7.970487271  | -12.635163569 | -10.814842275 | 0 | 1 | 0 | # | ob  |
| 3615 | 44 | 5 | 2.100000  | 6.039803477  | -6.663500962  | -13.446713478 | 0 | 1 | 0 | # | st  |
| 3616 | 44 | 5 | 2.100000  | 8.611829217  | -6.654519659  | -9.218820449  | 0 | 1 | 0 | # | st  |
| 3617 | 44 | 5 | 2.100000  | 9.535176051  | -12.022163392 | -16.155125016 | 0 | 1 | 0 | # | st  |
| 3618 | 44 | 5 | 2.100000  | 6.876533961  | -12.024860033 | -14.767921646 | 0 | 1 | 0 | # | st  |
| 3619 | 44 | 5 | 2.100000  | 9.448950250  | -12.015782580 | -10.540175727 | 0 | 1 | 0 | # | st  |
| 3620 | 44 | 5 | 2.100000  | 8.541472668  | -6.660702575  | -12.059455955 | 0 | 1 | 0 | # | st  |
| 3621 | 44 | 5 | 2.100000  | 6.947218745  | -12.018795815 | -11.927421788 | 0 | 1 | 0 | # | st  |
| 3622 | 44 | 1 | 1.575000  | 7.727751898  | -9.326242674  | -2.106452507  | 0 | 1 | 0 | # | ao  |
| 3623 | 44 | 1 | 1.575000  | 10.314891886 | -9.336267335  | -6.329552507  | 0 | 1 | 0 | # | ao  |
| 3624 | 44 | 1 | 1.575000  | 5.173275843  | -9.343085446  | -0.757989037  | 0 | 1 | 0 | # | ao  |
| 3625 | 44 | 1 | 1.575000  | 7.760279300  | -9.353073074  | -4.981097695  | 0 | 1 | 0 | # | ao  |
| 3626 | 44 | 2 | 0.425000  | 8.279155855  | -7.958936629  | -6.987748987  | 0 | 1 | 0 | # | ho  |
| 3627 | 44 | 2 | 0.425000  | 5.708722528  | -7.860595847  | -2.718287538  | 0 | 1 | 0 | # | ho  |
| 3628 | 44 | 2 | 0.425000  | 9.780464323  | -10.814890090 | -4.366998978  | 0 | 1 | 0 | # | ho  |
| 3629 | 44 | 2 | 0.425000  | 7.208867415  | -10.720857339 | -0.100174810  | 0 | 1 | 0 | # | ho  |
| 3630 | 44 | 3 | -1.050000 | 7.137120767  | -10.401549350 | -3.540819251  | 0 | 1 | 0 | # | ob  |
| 3631 | 44 | 3 | -1.050000 | 6.752083948  | -10.393634011 | -6.225770135  | 0 | 1 | 0 | # | ob  |
| 3632 | 44 | 3 | -1.050000 | 9.325620410  | -10.386335530 | -1.992022885  | 0 | 1 | 0 | # | ob  |
| 3633 | 44 | 3 | -1.050000 | 7.382550450  | -12.638429459 | -4.913787416  | 0 | 1 | 0 | # | ob  |
| 3634 | 44 | 3 | -1.050000 | 9.967143942  | -12.637628090 | -0.694848299  | 0 | 1 | 0 | # | ob  |
| 3635 | 44 | 3 | -1.050000 | 5.769405783  | -8.275939116  | -7.769166009  | 0 | 1 | 0 | # | ob  |
| 3636 | 44 | 3 | -1.050000 | 8.350975495  | -8.277784485  | -3.546748257  | 0 | 1 | 0 | # | ob  |
| 3637 | 44 | 3 | -1.050000 | 7.518325134  | -6.044156828  | -4.722452555  | 0 | 1 | 0 | # | ob  |
| 3638 | 44 | 3 | -1.050000 | 10.091742666 | -6.040640091  | -0.494130207  | 0 | 1 | 0 | # | ob  |
| 3639 | 44 | 3 | -1.050000 | 5.521399510  | -6.041354729  | -6.392656438  | 0 | 1 | 0 | # | ob  |
| 3640 | 44 | 3 | -1.050000 | 8.105959518  | -6.041077613  | -2.173899070  | 0 | 1 | 0 | # | ob  |
| 3641 | 44 | 4 | -0.950000 | 6.136617447  | -8.354042618  | -1.993288188  | 0 | 1 | 0 | # | oh  |
| 3642 | 44 | 4 | -0.950000 | 8.721870440  | -8.366735269  | -6.220340000  | 0 | 1 | 0 | # | oh  |
| 3643 | 44 | 3 | -1.050000 | 7.531790946  | -6.317606791  | -8.032003882  | 0 | 1 | 0 | # | ob  |
| 3644 | 44 | 3 | -1.050000 | 10.126075993 | -6.333759730  | -3.800661108  | 0 | 1 | 0 | # | ob  |
| 3645 | 44 | 4 | -0.950000 | 6.766165723  | -10.312589933 | -0.867370730  | 0 | 1 | 0 | # | oh  |
| 3646 | 44 | 3 | -1.050000 | 5.362751485  | -12.345953389 | -3.286683302  | 0 | 1 | 0 | # | ob  |
| 3647 | 44 | 4 | -0.950000 | 9.351776468  | -10.324863219 | -5.093840393  | 0 | 1 | 0 | # | oh  |
| 3648 | 44 | 3 | -1.050000 | 7.956469734  | -12.361777046 | -7.505235566  | 0 | 1 | 0 | # | ob  |
| 3649 | 44 | 3 | -1.050000 | 6.162737272  | -8.292941387  | -5.095757722  | 0 | 1 | 0 | # | ob  |
| 3650 | 44 | 3 | -1.050000 | 8.736285134  | -8.285734762  | -0.861724339  | 0 | 1 | 0 | # | ob  |
| 3651 | 44 | 3 | -1.050000 | 9.718637623  | -10.403223292 | -7.767860028  | 0 | 1 | 0 | # | ob  |
| 3652 | 44 | 3 | -1.050000 | 5.396534585  | -12.638466293 | -6.593423632  | 0 | 1 | 0 | # | ob  |
| 3653 | 44 | 3 | -1.050000 | 7.970487271  | -12.635163569 | -2.365242275  | 0 | 1 | 0 | # | ob  |
| 3654 | 44 | 5 | 2.100000  | 6.039803477  | -6.663500962  | -4.997113478  | 0 | 1 | 0 | # | st  |
| 3655 | 44 | 5 | 2.100000  | 8.611829217  | -6.654519659  | -0.769220449  | 0 | 1 | 0 | # | st  |
| 3656 | 44 | 5 | 2.100000  | 9.535176051  | -12.022163392 | -7.705525016  | 0 | 1 | 0 | # | st  |
| 3657 | 44 | 5 | 2.100000  | 6.876533961  | -12.024860033 | -6.318321646  | 0 | 1 | 0 | # | st  |
| 3658 | 44 | 5 | 2.100000  | 9.448950250  | -12.015782580 | -2.090575727  | 0 | 1 | 0 | # | st  |
| 3659 | 44 | 5 | 2.100000  | 5.953078839  | -6.657050089  | -7.831638849  | 0 | 1 | 0 | # | st  |
| 3660 | 44 | 5 | 2.100000  | 8.541472668  | -6.660702575  | -3.609855955  | 0 | 1 | 0 | # | st  |
| 3661 | 44 | 5 | 2.100000  | 6.947218745  | -12.018795815 | -3.477821788  | 0 | 1 | 0 | # | st  |
| 3662 | 44 | 8 | -0.950000 | 5.753006465  | -6.422615341  | -15.319631379 | 0 | 1 | 0 | # | oht |
| 3663 | 44 | 6 | 0.425000  | 5.592763167  | -6.305444923  | -16.411736324 | 0 | 1 | 0 | # | do  |
| 3664 | 44 | 6 | 0.425000  | 10.173589943 | -12.368058974 | -18.650841835 | 0 | 1 | 0 | # | do  |
| 3665 | 45 | 8 | -0.950000 | 15.129943942 | -12.637628090 | -17.594048299 | 0 | 1 | 0 | # | oht |
| 3666 | 45 | 1 | 1.575000  | 12.890551898 | -9.326242674  | -10.556052507 | 0 | 1 | 0 | # | ao  |
| 3667 | 45 | 1 | 1.575000  | 15.477691886 | -9.336267335  | -14.779152507 | 0 | 1 | 0 | # | ao  |
| 3668 | 45 | 1 | 1.575000  | 10.336075843 | -9.343085446  | -9.207589037  | 0 | 1 | 0 | # | ao  |
| 3669 | 45 | 1 | 1.575000  | 12.923079300 | -9.353073074  | -13.430697695 | 0 | 1 | 0 | # | ao  |
| 3670 | 45 | 6 | 0.425000  | 13.441955855 | -7.958936629  | -15.437348987 | 0 | 1 | 0 | # | do  |
| 3671 | 45 | 2 | 0.425000  | 10.871522528 | -7.860595847  | -11.167887538 | 0 | 1 | 0 | # | ho  |
| 3672 | 45 | 2 | 0.425000  | 14.943264323 | -10.814890090 | -12.816598978 | 0 | 1 | 0 | # | ho  |
| 3673 | 45 | 2 | 0.425000  | 12.371667415 | -10.720857339 | -8.549774810  | 0 | 1 | 0 | # | ho  |
| 3674 | 45 | 3 | -1.050000 | 12.299920767 | -10.401549350 | -11.990419251 | 0 | 1 | 0 | # | ob  |
| 3675 | 45 | 3 | -1.050000 | 11.914883948 | -10.393634011 | -14.675370135 | 0 | 1 | 0 | # | ob  |
| 3676 | 45 | 3 | -1.050000 | 14.488420410 | -10.386335530 | -10.441622885 | 0 | 1 | 0 | # | ob  |
| 3677 | 45 | 3 | -1.050000 | 12.545350450 | -12.638429459 | -13.363387416 | 0 | 1 | 0 | # | ob  |
| 3678 | 45 | 3 | -1.050000 | 15.129943942 | -12.637628090 | -9.144448299  | 0 | 1 | 0 | # | ob  |
| 3679 | 45 | 3 | -1.050000 | 13.513775495 | -8.277784485  | -11.996348257 | 0 | 1 | 0 | # | ob  |
| 3680 | 45 | 3 | -1.050000 | 12.681125134 | -6.044156828  | -13.172052555 | 0 | 1 | 0 | # | ob  |

|      |    |   |           |               |               |               |   |   |   |   |     |
|------|----|---|-----------|---------------|---------------|---------------|---|---|---|---|-----|
| 3681 | 45 | 3 | -1.050000 | 15.254542666  | -6.040640091  | -8.943730207  | 0 | 1 | 0 | # | ob  |
| 3682 | 45 | 3 | -1.050000 | 13.268759518  | -6.041077613  | -10.623499070 | 0 | 1 | 0 | # | ob  |
| 3683 | 45 | 4 | -0.950000 | 11.299417447  | -8.354042618  | -10.442888188 | 0 | 1 | 0 | # | oh  |
| 3684 | 45 | 7 | -0.950000 | 13.884670440  | -8.366735269  | -14.669940000 | 0 | 1 | 0 | # | oho |
| 3685 | 45 | 3 | -1.050000 | 15.288875993  | -6.333759730  | -12.250261108 | 0 | 1 | 0 | # | ob  |
| 3686 | 45 | 4 | -0.950000 | 11.928965723  | -10.312589933 | -9.316970730  | 0 | 1 | 0 | # | oh  |
| 3687 | 45 | 3 | -1.050000 | 10.525551485  | -12.345953389 | -11.736283302 | 0 | 1 | 0 | # | ob  |
| 3688 | 45 | 4 | -0.950000 | 14.514576468  | -10.324863219 | -13.543440393 | 0 | 1 | 0 | # | oh  |
| 3689 | 45 | 3 | -1.050000 | 13.119269734  | -12.361777046 | -15.954835566 | 0 | 1 | 0 | # | ob  |
| 3690 | 45 | 3 | -1.050000 | 11.325537272  | -8.292941387  | -13.545357722 | 0 | 1 | 0 | # | ob  |
| 3691 | 45 | 3 | -1.050000 | 13.899085134  | -8.285734762  | -9.311324339  | 0 | 1 | 0 | # | ob  |
| 3692 | 45 | 3 | -1.050000 | 14.881437623  | -10.403223292 | -16.217460028 | 0 | 1 | 0 | # | ob  |
| 3693 | 45 | 3 | -1.050000 | 10.559334585  | -12.638466293 | -15.043023632 | 0 | 1 | 0 | # | ob  |
| 3694 | 45 | 3 | -1.050000 | 13.133287271  | -12.635163569 | -10.814842275 | 0 | 1 | 0 | # | ob  |
| 3695 | 45 | 5 | 2.100000  | 11.202603477  | -6.663500962  | -13.446713478 | 0 | 1 | 0 | # | st  |
| 3696 | 45 | 5 | 2.100000  | 13.774629217  | -6.654519659  | -9.218820449  | 0 | 1 | 0 | # | st  |
| 3697 | 45 | 5 | 2.100000  | 14.697976051  | -12.022163392 | -16.155125016 | 0 | 1 | 0 | # | st  |
| 3698 | 45 | 5 | 2.100000  | 12.039333961  | -12.024860033 | -14.767921646 | 0 | 1 | 0 | # | st  |
| 3699 | 45 | 5 | 2.100000  | 14.611750250  | -12.015782580 | -10.540175727 | 0 | 1 | 0 | # | st  |
| 3700 | 45 | 5 | 2.100000  | 13.704272668  | -6.660702575  | -12.059455955 | 0 | 1 | 0 | # | st  |
| 3701 | 45 | 5 | 2.100000  | 12.110018745  | -12.018795815 | -11.927421788 | 0 | 1 | 0 | # | st  |
| 3702 | 45 | 1 | 1.575000  | 12.890551898  | -9.326242674  | -2.106452507  | 0 | 1 | 0 | # | ao  |
| 3703 | 45 | 1 | 1.575000  | 15.477691886  | -9.336267335  | -6.329552507  | 0 | 1 | 0 | # | ao  |
| 3704 | 45 | 1 | 1.575000  | 10.336075843  | -9.343085446  | -0.757989037  | 0 | 1 | 0 | # | ao  |
| 3705 | 45 | 1 | 1.575000  | 12.923079300  | -9.353073074  | -4.981097695  | 0 | 1 | 0 | # | ao  |
| 3706 | 45 | 2 | 0.425000  | 13.441955855  | -7.958936629  | -6.987748987  | 0 | 1 | 0 | # | ho  |
| 3707 | 45 | 2 | 0.425000  | 10.871522528  | -7.860595847  | -2.718287538  | 0 | 1 | 0 | # | ho  |
| 3708 | 45 | 2 | 0.425000  | 14.943264323  | -10.814890090 | -4.366998978  | 0 | 1 | 0 | # | ho  |
| 3709 | 45 | 2 | 0.425000  | 12.371667415  | -10.720857339 | -0.100174810  | 0 | 1 | 0 | # | ho  |
| 3710 | 45 | 3 | -1.050000 | 12.299920767  | -10.401549350 | -3.540819251  | 0 | 1 | 0 | # | ob  |
| 3711 | 45 | 3 | -1.050000 | 11.914883948  | -10.393634011 | -6.225770135  | 0 | 1 | 0 | # | ob  |
| 3712 | 45 | 3 | -1.050000 | 14.488420410  | -10.386335530 | -1.992022885  | 0 | 1 | 0 | # | ob  |
| 3713 | 45 | 3 | -1.050000 | 12.545350450  | -12.638429459 | -4.913787416  | 0 | 1 | 0 | # | ob  |
| 3714 | 45 | 3 | -1.050000 | 15.129943942  | -12.637628090 | -0.694848299  | 0 | 1 | 0 | # | ob  |
| 3715 | 45 | 3 | -1.050000 | 10.932205783  | -8.275939116  | -7.769166009  | 0 | 1 | 0 | # | ob  |
| 3716 | 45 | 3 | -1.050000 | 13.513775495  | -8.277784485  | -3.546748257  | 0 | 1 | 0 | # | ob  |
| 3717 | 45 | 3 | -1.050000 | 12.681125134  | -6.044156828  | -4.722452555  | 0 | 1 | 0 | # | ob  |
| 3718 | 45 | 3 | -1.050000 | 15.254542666  | -6.040640091  | -0.494130207  | 0 | 1 | 0 | # | ob  |
| 3719 | 45 | 3 | -1.050000 | 10.684199510  | -6.041354729  | -6.392656438  | 0 | 1 | 0 | # | ob  |
| 3720 | 45 | 3 | -1.050000 | 13.268759518  | -6.041077613  | -2.173899070  | 0 | 1 | 0 | # | ob  |
| 3721 | 45 | 4 | -0.950000 | 11.299417447  | -8.354042618  | -1.993288188  | 0 | 1 | 0 | # | oh  |
| 3722 | 45 | 4 | -0.950000 | 13.884670440  | -8.366735269  | -6.220340000  | 0 | 1 | 0 | # | oh  |
| 3723 | 45 | 3 | -1.050000 | 12.694590946  | -6.317606791  | -8.032003882  | 0 | 1 | 0 | # | ob  |
| 3724 | 45 | 3 | -1.050000 | 15.288875993  | -6.333759730  | -3.800661108  | 0 | 1 | 0 | # | ob  |
| 3725 | 45 | 4 | -0.950000 | 11.928965723  | -10.312589933 | -0.867370730  | 0 | 1 | 0 | # | oh  |
| 3726 | 45 | 3 | -1.050000 | 10.525551485  | -12.345953389 | -3.286683302  | 0 | 1 | 0 | # | ob  |
| 3727 | 45 | 4 | -0.950000 | 14.514576468  | -10.324863219 | -5.093840393  | 0 | 1 | 0 | # | oh  |
| 3728 | 45 | 3 | -1.050000 | 13.119269734  | -12.361777046 | -7.505235566  | 0 | 1 | 0 | # | ob  |
| 3729 | 45 | 3 | -1.050000 | 11.325537272  | -8.292941387  | -5.095757722  | 0 | 1 | 0 | # | ob  |
| 3730 | 45 | 3 | -1.050000 | 13.899085134  | -8.285734762  | -0.861724339  | 0 | 1 | 0 | # | ob  |
| 3731 | 45 | 3 | -1.050000 | 14.881437623  | -10.403223292 | -7.767860028  | 0 | 1 | 0 | # | ob  |
| 3732 | 45 | 3 | -1.050000 | 10.559334585  | -12.638466293 | -6.593423632  | 0 | 1 | 0 | # | ob  |
| 3733 | 45 | 3 | -1.050000 | 13.133287271  | -12.635163569 | -2.365242275  | 0 | 1 | 0 | # | ob  |
| 3734 | 45 | 5 | 2.100000  | 11.202603477  | -6.663500962  | -4.997113478  | 0 | 1 | 0 | # | st  |
| 3735 | 45 | 5 | 2.100000  | 13.774629217  | -6.654519659  | -0.769220449  | 0 | 1 | 0 | # | st  |
| 3736 | 45 | 5 | 2.100000  | 14.697976051  | -12.022163392 | -7.705525016  | 0 | 1 | 0 | # | st  |
| 3737 | 45 | 5 | 2.100000  | 12.039333961  | -12.024860033 | -6.318321646  | 0 | 1 | 0 | # | st  |
| 3738 | 45 | 5 | 2.100000  | 14.611750250  | -12.015782580 | -2.090575727  | 0 | 1 | 0 | # | st  |
| 3739 | 45 | 5 | 2.100000  | 11.115878839  | -6.657050089  | -7.831638849  | 0 | 1 | 0 | # | st  |
| 3740 | 45 | 5 | 2.100000  | 13.704272668  | -6.660702575  | -3.609855955  | 0 | 1 | 0 | # | st  |
| 3741 | 45 | 5 | 2.100000  | 12.110018745  | -12.018795815 | -3.477821788  | 0 | 1 | 0 | # | st  |
| 3742 | 45 | 8 | -0.950000 | 10.915806465  | -6.422615341  | -15.319631379 | 0 | 1 | 0 | # | oht |
| 3743 | 45 | 6 | 0.425000  | 10.755563167  | -6.305444923  | -16.411736324 | 0 | 1 | 0 | # | do  |
| 3744 | 45 | 6 | 0.425000  | 15.336389943  | -12.368058974 | -18.650841835 | 0 | 1 | 0 | # | do  |
| 3745 | 46 | 8 | -0.950000 | -10.684056058 | -12.637628090 | -17.594048299 | 1 | 1 | 0 | # | oht |
| 3746 | 46 | 1 | 1.575000  | -12.923448102 | -9.326242674  | -10.556052507 | 1 | 1 | 0 | # | ao  |
| 3747 | 46 | 1 | 1.575000  | -10.336308114 | -9.336267335  | -14.779152507 | 1 | 1 | 0 | # | ao  |
| 3748 | 46 | 1 | 1.575000  | -15.477924157 | -9.343085446  | -9.207589037  | 1 | 1 | 0 | # | ao  |
| 3749 | 46 | 1 | 1.575000  | -12.890920700 | -9.353073074  | -13.430697695 | 1 | 1 | 0 | # | ao  |
| 3750 | 46 | 6 | 0.425000  | -12.372044145 | -7.958936629  | -15.437348987 | 1 | 1 | 0 | # | do  |
| 3751 | 46 | 2 | 0.425000  | -14.942477472 | -7.860595847  | -11.167887538 | 1 | 1 | 0 | # | ho  |
| 3752 | 46 | 2 | 0.425000  | -10.870735677 | -10.814890090 | -12.816598978 | 1 | 1 | 0 | # | ho  |
| 3753 | 46 | 2 | 0.425000  | -13.442332585 | -10.720857339 | -8.549774810  | 1 | 1 | 0 | # | ho  |
| 3754 | 46 | 3 | -1.050000 | -13.514079233 | -10.401549350 | -11.990419251 | 1 | 1 | 0 | # | ob  |
| 3755 | 46 | 3 | -1.050000 | -13.899116052 | -10.393634011 | -14.675370135 | 1 | 1 | 0 | # | ob  |
| 3756 | 46 | 3 | -1.050000 | -11.325579590 | -10.386335530 | -10.441622885 | 1 | 1 | 0 | # | ob  |
| 3757 | 46 | 3 | -1.050000 | -13.268649550 | -12.638429459 | -13.363387416 | 1 | 1 | 0 | # | ob  |
| 3758 | 46 | 3 | -1.050000 | -10.684056058 | -12.637628090 | -9.144448299  | 1 | 1 | 0 | # | ob  |
| 3759 | 46 | 3 | -1.050000 | -12.300224505 | -8.277784485  | -11.996348257 | 1 | 1 | 0 | # | ob  |
| 3760 | 46 | 3 | -1.050000 | -13.132874866 | -6.044156828  | -13.172052555 | 1 | 1 | 0 | # | ob  |
| 3761 | 46 | 3 | -1.050000 | -10.559457334 | -6.040640091  | -8.943730207  | 1 | 1 | 0 | # | ob  |
| 3762 | 46 | 3 | -1.050000 | -12.545240482 | -6.041077613  | -10.623499070 | 1 | 1 | 0 | # | ob  |
| 3763 | 46 | 4 | -0.950000 | -14.514582553 | -8.354042618  | -10.442888188 | 1 | 1 | 0 | # | oh  |
| 3764 | 46 | 7 | -0.950000 | -11.929329560 | -8.366735269  | -14.669940000 | 1 | 1 | 0 | # | oho |
| 3765 | 46 | 3 | -1.050000 | -10.525124007 | -6.333759730  | -12.250261108 | 1 | 1 | 0 | # | ob  |
| 3766 | 46 | 4 | -0.950000 | -13.885034277 | -10.312589933 | -9.316970730  | 1 | 1 | 0 | # | oh  |
| 3767 | 46 | 3 | -1.050000 | -15.288448515 | -12.345953389 | -11.736283302 | 1 | 1 | 0 | # | ob  |
| 3768 | 46 | 4 | -0.950000 | -11.299423532 | -10.324863219 | -13.543440393 | 1 | 1 | 0 | # | oh  |
| 3769 | 46 | 3 | -1.050000 | -12.694730266 | -12.361777046 | -15.954835566 | 1 | 1 | 0 | # | ob  |
| 3770 | 46 | 3 | -1.050000 | -14.488462728 | -8.292941387  | -13.545357722 | 1 | 1 | 0 | # | ob  |
| 3771 | 46 | 3 | -1.050000 | -11.914914866 | -8.285734762  | -9.311324339  | 1 | 1 | 0 | # | ob  |
| 3772 | 46 | 3 | -1.050000 | -10.932562377 | -10.403223292 | -16.217460028 | 1 | 1 | 0 | # | ob  |
| 3773 | 46 | 3 | -1.050000 | -15.254665415 | -12.638466293 | -15.043023632 | 1 | 1 | 0 | # | ob  |

|      |    |   |           |               |               |               |   |   |   |   |     |
|------|----|---|-----------|---------------|---------------|---------------|---|---|---|---|-----|
| 3774 | 46 | 3 | -1.050000 | -12.680712729 | -12.635163569 | -10.814842275 | 1 | 1 | 0 | # | ob  |
| 3775 | 46 | 5 | 2.100000  | -14.611396523 | -6.663500962  | -13.446713478 | 1 | 1 | 0 | # | st  |
| 3776 | 46 | 5 | 2.100000  | -12.039370783 | -6.654519659  | -9.218820449  | 1 | 1 | 0 | # | st  |
| 3777 | 46 | 5 | 2.100000  | -11.116023949 | -12.022163392 | -16.155125016 | 1 | 1 | 0 | # | st  |
| 3778 | 46 | 5 | 2.100000  | -13.774666039 | -12.024860033 | -14.767921646 | 1 | 1 | 0 | # | st  |
| 3779 | 46 | 5 | 2.100000  | -11.202249750 | -12.015782580 | -10.540175727 | 1 | 1 | 0 | # | st  |
| 3780 | 46 | 5 | 2.100000  | -12.109727332 | -6.660702575  | -12.059455955 | 1 | 1 | 0 | # | st  |
| 3781 | 46 | 5 | 2.100000  | -13.703981255 | -12.018795815 | -11.927421788 | 1 | 1 | 0 | # | st  |
| 3782 | 46 | 1 | 1.575000  | -12.923448102 | -9.326242674  | -2.106452507  | 1 | 1 | 0 | # | ao  |
| 3783 | 46 | 1 | 1.575000  | -10.336308114 | -9.336267335  | -6.329552507  | 1 | 1 | 0 | # | ao  |
| 3784 | 46 | 1 | 1.575000  | -15.477924157 | -9.343085446  | -0.757989037  | 1 | 1 | 0 | # | ao  |
| 3785 | 46 | 1 | 1.575000  | -12.890920700 | -9.353073074  | -4.981097695  | 1 | 1 | 0 | # | ao  |
| 3786 | 46 | 2 | 0.425000  | -12.372044145 | -7.958936629  | -6.987748987  | 1 | 1 | 0 | # | ho  |
| 3787 | 46 | 2 | 0.425000  | -14.942477472 | -7.860595847  | -2.718287538  | 1 | 1 | 0 | # | ho  |
| 3788 | 46 | 2 | 0.425000  | -10.870735677 | -10.814890090 | -4.366998978  | 1 | 1 | 0 | # | ho  |
| 3789 | 46 | 2 | 0.425000  | -13.442332585 | -10.720857339 | -0.100174810  | 1 | 1 | 0 | # | ho  |
| 3790 | 46 | 3 | -1.050000 | -13.514079233 | -10.401549350 | -3.540819251  | 1 | 1 | 0 | # | ob  |
| 3791 | 46 | 3 | -1.050000 | -13.899116052 | -10.393634011 | -6.225770135  | 1 | 1 | 0 | # | ob  |
| 3792 | 46 | 3 | -1.050000 | -11.325579590 | -10.386335530 | -1.992022885  | 1 | 1 | 0 | # | ob  |
| 3793 | 46 | 3 | -1.050000 | -13.268649550 | -12.638429459 | -4.913787416  | 1 | 1 | 0 | # | ob  |
| 3794 | 46 | 3 | -1.050000 | -10.684056058 | -12.637628090 | -0.694848299  | 1 | 1 | 0 | # | ob  |
| 3795 | 46 | 3 | -1.050000 | -14.881794217 | -8.275939116  | -7.769166009  | 1 | 1 | 0 | # | ob  |
| 3796 | 46 | 3 | -1.050000 | -12.300224505 | -8.277784485  | -3.546748257  | 1 | 1 | 0 | # | ob  |
| 3797 | 46 | 3 | -1.050000 | -13.132874866 | -6.044156828  | -4.722452555  | 1 | 1 | 0 | # | ob  |
| 3798 | 46 | 3 | -1.050000 | -10.559457334 | -6.040640091  | -0.494130207  | 1 | 1 | 0 | # | ob  |
| 3799 | 46 | 3 | -1.050000 | -15.129800490 | -6.041354729  | -6.392656438  | 1 | 1 | 0 | # | ob  |
| 3800 | 46 | 3 | -1.050000 | -12.545240482 | -6.041077613  | -2.173899070  | 1 | 1 | 0 | # | ob  |
| 3801 | 46 | 4 | -0.950000 | -14.514582553 | -8.354042618  | -1.993288188  | 1 | 1 | 0 | # | oh  |
| 3802 | 46 | 4 | -0.950000 | -11.929329560 | -8.366735269  | -6.220340000  | 1 | 1 | 0 | # | oh  |
| 3803 | 46 | 3 | -1.050000 | -13.119409054 | -6.317606791  | -8.032003882  | 1 | 1 | 0 | # | ob  |
| 3804 | 46 | 3 | -1.050000 | -10.525124007 | -6.333759730  | -3.800661108  | 1 | 1 | 0 | # | ob  |
| 3805 | 46 | 4 | -0.950000 | -13.885034277 | -10.312589933 | -0.867370730  | 1 | 1 | 0 | # | oh  |
| 3806 | 46 | 3 | -1.050000 | -15.288448515 | -12.345953389 | -3.286683302  | 1 | 1 | 0 | # | ob  |
| 3807 | 46 | 4 | -0.950000 | -11.299423532 | -10.324863219 | -5.093840393  | 1 | 1 | 0 | # | oh  |
| 3808 | 46 | 3 | -1.050000 | -12.694730266 | -12.361777046 | -7.505235566  | 1 | 1 | 0 | # | ob  |
| 3809 | 46 | 3 | -1.050000 | -14.488462728 | -8.292941387  | -5.095757722  | 1 | 1 | 0 | # | ob  |
| 3810 | 46 | 3 | -1.050000 | -11.914914866 | -8.285734762  | -0.861724339  | 1 | 1 | 0 | # | ob  |
| 3811 | 46 | 3 | -1.050000 | -10.932562377 | -10.403223292 | -7.767860028  | 1 | 1 | 0 | # | ob  |
| 3812 | 46 | 3 | -1.050000 | -15.254665415 | -12.638466293 | -6.593423632  | 1 | 1 | 0 | # | ob  |
| 3813 | 46 | 3 | -1.050000 | -12.680712729 | -12.635163569 | -2.365242275  | 1 | 1 | 0 | # | ob  |
| 3814 | 46 | 5 | 2.100000  | -14.611396523 | -6.663500962  | -4.997113478  | 1 | 1 | 0 | # | st  |
| 3815 | 46 | 5 | 2.100000  | -12.039370783 | -6.654519659  | -0.769220449  | 1 | 1 | 0 | # | st  |
| 3816 | 46 | 5 | 2.100000  | -11.116023949 | -12.022163392 | -7.705525016  | 1 | 1 | 0 | # | st  |
| 3817 | 46 | 5 | 2.100000  | -13.774666039 | -12.024860033 | -6.318321646  | 1 | 1 | 0 | # | st  |
| 3818 | 46 | 5 | 2.100000  | -11.202249750 | -12.015782580 | -2.090575727  | 1 | 1 | 0 | # | st  |
| 3819 | 46 | 5 | 2.100000  | -14.698121161 | -6.657050089  | -7.831638849  | 1 | 1 | 0 | # | st  |
| 3820 | 46 | 5 | 2.100000  | -12.109727332 | -6.660702575  | -3.609855955  | 1 | 1 | 0 | # | st  |
| 3821 | 46 | 5 | 2.100000  | -13.703981255 | -12.018795815 | -3.477821788  | 1 | 1 | 0 | # | st  |
| 3822 | 46 | 8 | -0.950000 | -14.898193535 | -6.422615341  | -15.319631379 | 1 | 1 | 0 | # | oht |
| 3823 | 46 | 6 | 0.425000  | -15.058436833 | -6.305444923  | -16.411736324 | 1 | 1 | 0 | # | do  |
| 3824 | 46 | 6 | 0.425000  | -10.477610057 | -12.368058974 | -18.650841835 | 1 | 1 | 0 | # | do  |
| 3825 | 47 | 8 | -0.950000 | -5.521256058  | -12.637628090 | -17.594048299 | 1 | 1 | 0 | # | oht |
| 3826 | 47 | 1 | 1.575000  | -7.760648102  | -9.326242674  | -10.556052507 | 1 | 1 | 0 | # | ao  |
| 3827 | 47 | 1 | 1.575000  | -5.173508114  | -9.336267335  | -14.779152507 | 1 | 1 | 0 | # | ao  |
| 3828 | 47 | 1 | 1.575000  | -10.315124157 | -9.343085446  | -9.207589037  | 1 | 1 | 0 | # | ao  |
| 3829 | 47 | 1 | 1.575000  | -7.728120700  | -9.353073074  | -13.430697695 | 1 | 1 | 0 | # | ao  |
| 3830 | 47 | 6 | 0.425000  | -7.209244145  | -7.958936629  | -15.437348987 | 1 | 1 | 0 | # | do  |
| 3831 | 47 | 2 | 0.425000  | -9.779677472  | -7.860595847  | -11.167887538 | 1 | 1 | 0 | # | ho  |
| 3832 | 47 | 2 | 0.425000  | -5.707935677  | -10.814890090 | -12.816598978 | 1 | 1 | 0 | # | ho  |
| 3833 | 47 | 2 | 0.425000  | -8.279532585  | -10.720857339 | -8.549774810  | 1 | 1 | 0 | # | ho  |
| 3834 | 47 | 3 | -1.050000 | -8.351279233  | -10.401549350 | -11.990419251 | 1 | 1 | 0 | # | ob  |
| 3835 | 47 | 3 | -1.050000 | -8.736316052  | -10.393634011 | -14.675370135 | 1 | 1 | 0 | # | ob  |
| 3836 | 47 | 3 | -1.050000 | -6.162779590  | -10.386335530 | -10.441622885 | 1 | 1 | 0 | # | ob  |
| 3837 | 47 | 3 | -1.050000 | -8.105849550  | -12.638429459 | -13.363387416 | 1 | 1 | 0 | # | ob  |
| 3838 | 47 | 3 | -1.050000 | -5.521256058  | -12.637628090 | -9.144448299  | 1 | 1 | 0 | # | ob  |
| 3839 | 47 | 3 | -1.050000 | -7.137424505  | -8.277784485  | -11.996348257 | 1 | 1 | 0 | # | ob  |
| 3840 | 47 | 3 | -1.050000 | -7.970074866  | -6.044156828  | -13.172052555 | 1 | 1 | 0 | # | ob  |
| 3841 | 47 | 3 | -1.050000 | -5.396657334  | -6.040640091  | -8.943730207  | 1 | 1 | 0 | # | ob  |
| 3842 | 47 | 3 | -1.050000 | -7.382440482  | -6.041077613  | -10.623499070 | 1 | 1 | 0 | # | ob  |
| 3843 | 47 | 4 | -0.950000 | -9.351782553  | -8.354042618  | -10.442888188 | 1 | 1 | 0 | # | oh  |
| 3844 | 47 | 7 | -0.950000 | -6.766529560  | -8.366735269  | -14.669940000 | 1 | 1 | 0 | # | oho |
| 3845 | 47 | 3 | -1.050000 | -5.362324007  | -6.333759730  | -12.250261108 | 1 | 1 | 0 | # | ob  |
| 3846 | 47 | 4 | -0.950000 | -8.722234277  | -10.312589933 | -9.316970730  | 1 | 1 | 0 | # | oh  |
| 3847 | 47 | 3 | -1.050000 | -10.125648515 | -12.345953389 | -11.736283302 | 1 | 1 | 0 | # | ob  |
| 3848 | 47 | 4 | -0.950000 | -6.136623532  | -10.324863219 | -13.543440393 | 1 | 1 | 0 | # | oh  |
| 3849 | 47 | 3 | -1.050000 | -7.531930266  | -12.361777046 | -15.954835566 | 1 | 1 | 0 | # | ob  |
| 3850 | 47 | 3 | -1.050000 | -9.325662728  | -8.292941387  | -13.543537722 | 1 | 1 | 0 | # | ob  |
| 3851 | 47 | 3 | -1.050000 | -6.752114866  | -8.285734762  | -9.311324339  | 1 | 1 | 0 | # | ob  |
| 3852 | 47 | 3 | -1.050000 | -5.769762377  | -10.403223292 | -16.217460028 | 1 | 1 | 0 | # | ob  |
| 3853 | 47 | 3 | -1.050000 | -10.091865415 | -12.638466293 | -15.043023632 | 1 | 1 | 0 | # | ob  |
| 3854 | 47 | 3 | -1.050000 | -7.517912729  | -12.635163569 | -10.814842275 | 1 | 1 | 0 | # | ob  |
| 3855 | 47 | 5 | 2.100000  | -9.448596523  | -6.663500962  | -13.446713478 | 1 | 1 | 0 | # | st  |
| 3856 | 47 | 5 | 2.100000  | -6.876570783  | -6.654519659  | -9.218820449  | 1 | 1 | 0 | # | st  |
| 3857 | 47 | 5 | 2.100000  | -5.953223949  | -12.022163392 | -16.155125016 | 1 | 1 | 0 | # | st  |
| 3858 | 47 | 5 | 2.100000  | -8.611866039  | -12.024860033 | -14.767921646 | 1 | 1 | 0 | # | st  |
| 3859 | 47 | 5 | 2.100000  | -6.039449750  | -12.015782580 | -10.540175727 | 1 | 1 | 0 | # | st  |
| 3860 | 47 | 5 | 2.100000  | -6.946927332  | -6.660702575  | -12.059455955 | 1 | 1 | 0 | # | st  |
| 3861 | 47 | 5 | 2.100000  | -8.541181255  | -12.018795815 | -11.927421788 | 1 | 1 | 0 | # | st  |
| 3862 | 47 | 1 | 1.575000  | -7.760648102  | -9.326242674  | -2.106452507  | 1 | 1 | 0 | # | ao  |
| 3863 | 47 | 1 | 1.575000  | -5.173508114  | -9.336267335  | -6.329552507  | 1 | 1 | 0 | # | ao  |
| 3864 | 47 | 1 | 1.575000  | -10.315124157 | -9.343085446  | -0.757989037  | 1 | 1 | 0 | # | ao  |
| 3865 | 47 | 1 | 1.575000  | -7.728120700  | -9.353073074  | -4.981097695  | 1 | 1 | 0 | # | ao  |
| 3866 | 47 | 2 | 0.425000  | -7.209244145  | -7.958936629  | -6.987748987  | 1 | 1 | 0 | # | ho  |



|      |    |   |           |               |               |               |   |   |   |   |     |
|------|----|---|-----------|---------------|---------------|---------------|---|---|---|---|-----|
| 3867 | 47 | 2 | 0.425000  | -9.779677472  | -7.860595847  | -2.718287538  | 1 | 1 | 0 | # | ho  |
| 3868 | 47 | 2 | 0.425000  | -5.707935677  | -10.814890090 | -4.366998978  | 1 | 1 | 0 | # | ho  |
| 3869 | 47 | 2 | 0.425000  | -8.279532585  | -10.720857339 | -0.100174810  | 1 | 1 | 0 | # | ho  |
| 3870 | 47 | 3 | -1.050000 | -8.351279233  | -10.401549350 | -3.540819251  | 1 | 1 | 0 | # | ob  |
| 3871 | 47 | 3 | -1.050000 | -8.736316052  | -10.393634011 | -6.225770135  | 1 | 1 | 0 | # | ob  |
| 3872 | 47 | 3 | -1.050000 | -6.162779590  | -10.386335530 | -1.992022885  | 1 | 1 | 0 | # | ob  |
| 3873 | 47 | 3 | -1.050000 | -8.105849550  | -12.638429459 | -4.913787416  | 1 | 1 | 0 | # | ob  |
| 3874 | 47 | 3 | -1.050000 | -5.521256058  | -12.637628090 | -0.694848299  | 1 | 1 | 0 | # | ob  |
| 3875 | 47 | 3 | -1.050000 | -9.718994217  | -8.275939116  | -7.769166009  | 1 | 1 | 0 | # | ob  |
| 3876 | 47 | 3 | -1.050000 | -7.137424505  | -8.277784485  | -3.546748257  | 1 | 1 | 0 | # | ob  |
| 3877 | 47 | 3 | -1.050000 | -7.970074866  | -6.044156828  | -4.722452555  | 1 | 1 | 0 | # | ob  |
| 3878 | 47 | 3 | -1.050000 | -5.396657334  | -6.040640091  | -0.494130207  | 1 | 1 | 0 | # | ob  |
| 3879 | 47 | 3 | -1.050000 | -9.967000490  | -6.041354729  | -6.392656438  | 1 | 1 | 0 | # | ob  |
| 3880 | 47 | 3 | -1.050000 | -7.382440482  | -6.041077613  | -2.173899070  | 1 | 1 | 0 | # | ob  |
| 3881 | 47 | 4 | -0.950000 | -9.351782553  | -8.354042618  | -1.993288188  | 1 | 1 | 0 | # | oh  |
| 3882 | 47 | 4 | -0.950000 | -6.766529560  | -8.366735269  | -6.220340000  | 1 | 1 | 0 | # | oh  |
| 3883 | 47 | 3 | -1.050000 | -7.956609054  | -6.317606791  | -8.032003882  | 1 | 1 | 0 | # | ob  |
| 3884 | 47 | 3 | -1.050000 | -5.362324007  | -6.333759730  | -3.800661108  | 1 | 1 | 0 | # | ob  |
| 3885 | 47 | 4 | -0.950000 | -8.722234277  | -10.312589933 | -0.867370730  | 1 | 1 | 0 | # | oh  |
| 3886 | 47 | 3 | -1.050000 | -10.125648515 | -12.345953389 | -3.286683302  | 1 | 1 | 0 | # | ob  |
| 3887 | 47 | 4 | -0.950000 | -6.136623532  | -10.324863219 | -5.093840393  | 1 | 1 | 0 | # | oh  |
| 3888 | 47 | 3 | -1.050000 | -7.531930266  | -12.361777046 | -7.505235566  | 1 | 1 | 0 | # | ob  |
| 3889 | 47 | 3 | -1.050000 | -9.325662728  | -8.292941387  | -5.095757722  | 1 | 1 | 0 | # | ob  |
| 3890 | 47 | 3 | -1.050000 | -6.752114866  | -8.285734762  | -0.861724339  | 1 | 1 | 0 | # | ob  |
| 3891 | 47 | 3 | -1.050000 | -5.769762377  | -10.403223292 | -7.767860028  | 1 | 1 | 0 | # | ob  |
| 3892 | 47 | 3 | -1.050000 | -10.091865415 | -12.638466293 | -6.593423632  | 1 | 1 | 0 | # | ob  |
| 3893 | 47 | 3 | -1.050000 | -7.517912729  | -12.635163569 | -2.365242275  | 1 | 1 | 0 | # | ob  |
| 3894 | 47 | 5 | 2.100000  | -9.448596523  | -6.663500962  | -4.997113478  | 1 | 1 | 0 | # | st  |
| 3895 | 47 | 5 | 2.100000  | -6.876570783  | -6.654519659  | -0.769220449  | 1 | 1 | 0 | # | st  |
| 3896 | 47 | 5 | 2.100000  | -5.953223949  | -12.022163392 | -7.705525016  | 1 | 1 | 0 | # | st  |
| 3897 | 47 | 5 | 2.100000  | -8.611866039  | -12.024860033 | -6.318321646  | 1 | 1 | 0 | # | st  |
| 3898 | 47 | 5 | 2.100000  | -6.039449750  | -12.015782580 | -2.090575727  | 1 | 1 | 0 | # | st  |
| 3899 | 47 | 5 | 2.100000  | -9.535321161  | -6.657050089  | -7.831638849  | 1 | 1 | 0 | # | st  |
| 3900 | 47 | 5 | 2.100000  | -6.946927332  | -6.660702575  | -3.609855955  | 1 | 1 | 0 | # | st  |
| 3901 | 47 | 5 | 2.100000  | -8.541181255  | -12.018795815 | -3.477821788  | 1 | 1 | 0 | # | st  |
| 3902 | 47 | 8 | -0.950000 | -9.735393535  | -6.422615341  | -15.319631379 | 1 | 1 | 0 | # | oht |
| 3903 | 47 | 6 | 0.425000  | -9.895636833  | -6.305444923  | -16.411736324 | 1 | 1 | 0 | # | do  |
| 3904 | 47 | 6 | 0.425000  | -5.314810057  | -12.368058974 | -18.650841835 | 1 | 1 | 0 | # | do  |
| 3905 | 48 | 8 | -0.950000 | -0.358456058  | -12.637628090 | -17.594048299 | 1 | 1 | 0 | # | oht |
| 3906 | 48 | 1 | 1.575000  | -2.597848102  | -9.326242674  | -10.556052507 | 1 | 1 | 0 | # | ao  |
| 3907 | 48 | 1 | 1.575000  | -0.010708114  | -9.336267335  | -14.779152507 | 1 | 1 | 0 | # | ao  |
| 3908 | 48 | 1 | 1.575000  | -5.152324157  | -9.343085446  | -9.207589037  | 1 | 1 | 0 | # | ao  |
| 3909 | 48 | 1 | 1.575000  | -2.565320700  | -9.353073074  | -13.430697695 | 1 | 1 | 0 | # | ao  |
| 3910 | 48 | 6 | 0.425000  | -2.046444145  | -7.958936629  | -15.437348987 | 1 | 1 | 0 | # | do  |
| 3911 | 48 | 2 | 0.425000  | -4.616877472  | -7.860595847  | -11.167887538 | 1 | 1 | 0 | # | ho  |
| 3912 | 48 | 2 | 0.425000  | -0.545135677  | -10.814890090 | -12.816598978 | 1 | 1 | 0 | # | ho  |
| 3913 | 48 | 2 | 0.425000  | -3.116732585  | -10.720857339 | -8.549774810  | 1 | 1 | 0 | # | ho  |
| 3914 | 48 | 3 | -1.050000 | -3.188479233  | -10.401549350 | -11.990419251 | 1 | 1 | 0 | # | ob  |
| 3915 | 48 | 3 | -1.050000 | -3.573516052  | -10.393634011 | -14.675370135 | 1 | 1 | 0 | # | ob  |
| 3916 | 48 | 3 | -1.050000 | -0.999979590  | -10.386335530 | -10.441622885 | 1 | 1 | 0 | # | ob  |
| 3917 | 48 | 3 | -1.050000 | -2.943049550  | -12.638429459 | -13.363387416 | 1 | 1 | 0 | # | ob  |
| 3918 | 48 | 3 | -1.050000 | -0.358456058  | -12.637628090 | -9.144448299  | 1 | 1 | 0 | # | ob  |
| 3919 | 48 | 3 | -1.050000 | -1.974624505  | -8.277784485  | -11.996348257 | 1 | 1 | 0 | # | ob  |
| 3920 | 48 | 3 | -1.050000 | -2.807274866  | -6.044156828  | -13.172052555 | 1 | 1 | 0 | # | ob  |
| 3921 | 48 | 3 | -1.050000 | -0.233857334  | -6.040640091  | -8.943730207  | 1 | 1 | 0 | # | ob  |
| 3922 | 48 | 3 | -1.050000 | -2.219640482  | -6.041077613  | -10.623499070 | 1 | 1 | 0 | # | ob  |
| 3923 | 48 | 4 | -0.950000 | -4.188982553  | -8.354042618  | -10.442888188 | 1 | 1 | 0 | # | oh  |
| 3924 | 48 | 7 | -0.950000 | -1.603729560  | -8.366735269  | -14.669940000 | 1 | 1 | 0 | # | oho |
| 3925 | 48 | 3 | -1.050000 | -0.199524007  | -6.333759730  | -12.250261108 | 1 | 1 | 0 | # | ob  |
| 3926 | 48 | 4 | -0.950000 | -3.559434277  | -10.312589933 | -9.316970730  | 1 | 1 | 0 | # | oh  |
| 3927 | 48 | 3 | -1.050000 | -4.962848515  | -12.345953389 | -11.736283302 | 1 | 1 | 0 | # | ob  |
| 3928 | 48 | 4 | -0.950000 | -0.973823532  | -10.324863219 | -13.543440393 | 1 | 1 | 0 | # | oh  |
| 3929 | 48 | 3 | -1.050000 | -2.369130266  | -12.361777046 | -15.954835566 | 1 | 1 | 0 | # | ob  |
| 3930 | 48 | 3 | -1.050000 | -4.162862728  | -8.292941387  | -13.545357722 | 1 | 1 | 0 | # | ob  |
| 3931 | 48 | 3 | -1.050000 | -1.589314866  | -8.285734762  | -9.311324339  | 1 | 1 | 0 | # | ob  |
| 3932 | 48 | 3 | -1.050000 | -0.606962377  | -10.403223292 | -16.217460028 | 1 | 1 | 0 | # | ob  |
| 3933 | 48 | 3 | -1.050000 | -4.929065415  | -12.638466293 | -15.043023632 | 1 | 1 | 0 | # | ob  |
| 3934 | 48 | 3 | -1.050000 | -2.355112729  | -12.635163569 | -10.814842275 | 1 | 1 | 0 | # | ob  |
| 3935 | 48 | 5 | 2.100000  | -4.285796523  | -6.663500962  | -13.446713478 | 1 | 1 | 0 | # | st  |
| 3936 | 48 | 5 | 2.100000  | -1.713770783  | -6.654519659  | -9.218820449  | 1 | 1 | 0 | # | st  |
| 3937 | 48 | 5 | 2.100000  | -0.790423949  | -12.022163392 | -16.155125016 | 1 | 1 | 0 | # | st  |
| 3938 | 48 | 5 | 2.100000  | -3.449066039  | -12.024860033 | -14.767921646 | 1 | 1 | 0 | # | st  |
| 3939 | 48 | 5 | 2.100000  | -0.876649750  | -12.015782580 | -10.540175727 | 1 | 1 | 0 | # | st  |
| 3940 | 48 | 5 | 2.100000  | -1.784127332  | -6.660702575  | -12.059455955 | 1 | 1 | 0 | # | st  |
| 3941 | 48 | 5 | 2.100000  | -3.378381255  | -12.018795815 | -11.927421788 | 1 | 1 | 0 | # | st  |
| 3942 | 48 | 1 | 1.575000  | -2.597848102  | -9.326242674  | -2.106452507  | 1 | 1 | 0 | # | ao  |
| 3943 | 48 | 1 | 1.575000  | -0.010708114  | -9.336267335  | -6.329552507  | 1 | 1 | 0 | # | ao  |
| 3944 | 48 | 1 | 1.575000  | -5.152324157  | -9.343085446  | -0.757989037  | 1 | 1 | 0 | # | ao  |
| 3945 | 48 | 1 | 1.575000  | -2.565320700  | -9.353073074  | -4.981097695  | 1 | 1 | 0 | # | ao  |
| 3946 | 48 | 2 | 0.425000  | -2.046444145  | -7.958936629  | -6.987748987  | 1 | 1 | 0 | # | ho  |
| 3947 | 48 | 2 | 0.425000  | -4.616877472  | -7.860595847  | -2.718287538  | 1 | 1 | 0 | # | ho  |
| 3948 | 48 | 2 | 0.425000  | -0.545135677  | -10.814890090 | -4.366998978  | 1 | 1 | 0 | # | ho  |
| 3949 | 48 | 2 | 0.425000  | -3.116732585  | -10.720857339 | -0.100174810  | 1 | 1 | 0 | # | ho  |
| 3950 | 48 | 3 | -1.050000 | -3.188479233  | -10.401549350 | -3.540819251  | 1 | 1 | 0 | # | ob  |
| 3951 | 48 | 3 | -1.050000 | -3.573516052  | -10.393634011 | -6.225770135  | 1 | 1 | 0 | # | ob  |
| 3952 | 48 | 3 | -1.050000 | -0.999979590  | -10.386335530 | -1.992022885  | 1 | 1 | 0 | # | ob  |
| 3953 | 48 | 3 | -1.050000 | -2.943049550  | -12.638429459 | -4.913787416  | 1 | 1 | 0 | # | ob  |
| 3954 | 48 | 3 | -1.050000 | -0.358456058  | -12.637628090 | -0.694848299  | 1 | 1 | 0 | # | ob  |
| 3955 | 48 | 3 | -1.050000 | -4.556194217  | -8.275939116  | -7.769166009  | 1 | 1 | 0 | # | ob  |
| 3956 | 48 | 3 | -1.050000 | -1.974624505  | -8.277784485  | -3.546748257  | 1 | 1 | 0 | # | ob  |
| 3957 | 48 | 3 | -1.050000 | -2.807274866  | -6.044156828  | -4.722452555  | 1 | 1 | 0 | # | ob  |
| 3958 | 48 | 3 | -1.050000 | -0.233857334  | -6.040640091  | -0.494130207  | 1 | 1 | 0 | # | ob  |
| 3959 | 48 | 3 | -1.050000 | -4.804200490  | -6.041354729  | -6.392656438  | 1 | 1 | 0 | # | ob  |

|      |    |   |           |              |               |               |   |   |   |   |     |
|------|----|---|-----------|--------------|---------------|---------------|---|---|---|---|-----|
| 3960 | 48 | 3 | -1.050000 | -2.219640482 | -6.041077613  | -2.173899070  | 1 | 1 | 0 | # | ob  |
| 3961 | 48 | 4 | -0.950000 | -4.188982553 | -8.354042618  | -1.993288188  | 1 | 1 | 0 | # | oh  |
| 3962 | 48 | 4 | -0.950000 | -1.603729560 | -8.366735269  | -6.220340000  | 1 | 1 | 0 | # | oh  |
| 3963 | 48 | 3 | -1.050000 | -2.793809054 | -6.317606791  | -8.032003882  | 1 | 1 | 0 | # | ob  |
| 3964 | 48 | 3 | -1.050000 | -0.199524007 | -6.333759730  | -3.800661108  | 1 | 1 | 0 | # | ob  |
| 3965 | 48 | 4 | -0.950000 | -3.559434277 | -10.312589933 | -0.867370730  | 1 | 1 | 0 | # | oh  |
| 3966 | 48 | 3 | -1.050000 | -4.962848515 | -12.345953389 | -3.286683302  | 1 | 1 | 0 | # | ob  |
| 3967 | 48 | 4 | -0.950000 | -0.973823532 | -10.324863219 | -5.093840393  | 1 | 1 | 0 | # | oh  |
| 3968 | 48 | 3 | -1.050000 | -2.369130266 | -12.361777046 | -7.505235566  | 1 | 1 | 0 | # | ob  |
| 3969 | 48 | 3 | -1.050000 | -4.162862728 | -8.292941387  | -5.095757722  | 1 | 1 | 0 | # | ob  |
| 3970 | 48 | 3 | -1.050000 | -1.589314866 | -8.285734762  | -0.861724339  | 1 | 1 | 0 | # | ob  |
| 3971 | 48 | 3 | -1.050000 | -0.606962377 | -10.403223292 | -7.767860028  | 1 | 1 | 0 | # | ob  |
| 3972 | 48 | 3 | -1.050000 | -4.929065415 | -12.638466293 | -6.593423632  | 1 | 1 | 0 | # | ob  |
| 3973 | 48 | 3 | -1.050000 | -2.355112729 | -12.635163569 | -2.365242275  | 1 | 1 | 0 | # | ob  |
| 3974 | 48 | 5 | 2.100000  | -4.285796523 | -6.663500962  | -4.997113478  | 1 | 1 | 0 | # | st  |
| 3975 | 48 | 5 | 2.100000  | -1.713770783 | -6.654519659  | -0.769220449  | 1 | 1 | 0 | # | st  |
| 3976 | 48 | 5 | 2.100000  | -0.790423949 | -12.022163392 | -7.705525016  | 1 | 1 | 0 | # | st  |
| 3977 | 48 | 5 | 2.100000  | -3.449066039 | -12.024860033 | -6.318321646  | 1 | 1 | 0 | # | st  |
| 3978 | 48 | 5 | 2.100000  | -0.876649750 | -12.015782580 | -2.090575727  | 1 | 1 | 0 | # | st  |
| 3979 | 48 | 5 | 2.100000  | -4.372521161 | -6.657050089  | -7.831638849  | 1 | 1 | 0 | # | st  |
| 3980 | 48 | 5 | 2.100000  | -1.784127332 | -6.660702575  | -3.609855955  | 1 | 1 | 0 | # | st  |
| 3981 | 48 | 5 | 2.100000  | -3.378381255 | -12.018795815 | -3.477821788  | 1 | 1 | 0 | # | st  |
| 3982 | 48 | 8 | -0.950000 | -4.572593535 | -6.422615341  | -15.319631379 | 1 | 1 | 0 | # | oht |
| 3983 | 48 | 6 | 0.425000  | -4.732836833 | -6.305444923  | -16.411736324 | 1 | 1 | 0 | # | do  |
| 3984 | 48 | 6 | 0.425000  | -0.152010057 | -12.368058974 | -18.650841835 | 1 | 1 | 0 | # | do  |

Bonds

|    |   |     |     |
|----|---|-----|-----|
| 1  | 1 | 5   | 21  |
| 2  | 1 | 6   | 20  |
| 3  | 1 | 7   | 26  |
| 4  | 1 | 8   | 24  |
| 5  | 1 | 45  | 60  |
| 6  | 1 | 46  | 59  |
| 7  | 1 | 47  | 65  |
| 8  | 2 | 48  | 63  |
| 9  | 3 | 85  | 81  |
| 10 | 3 | 86  | 84  |
| 11 | 1 | 91  | 107 |
| 12 | 1 | 92  | 106 |
| 13 | 1 | 93  | 112 |
| 14 | 1 | 94  | 110 |
| 15 | 1 | 131 | 146 |
| 16 | 1 | 132 | 145 |
| 17 | 1 | 133 | 151 |
| 18 | 2 | 134 | 149 |
| 19 | 3 | 171 | 167 |
| 20 | 3 | 172 | 170 |
| 21 | 1 | 177 | 193 |
| 22 | 1 | 178 | 192 |
| 23 | 1 | 179 | 198 |
| 24 | 1 | 180 | 196 |
| 25 | 1 | 217 | 232 |
| 26 | 1 | 218 | 231 |
| 27 | 1 | 219 | 237 |
| 28 | 2 | 220 | 235 |
| 29 | 3 | 257 | 253 |
| 30 | 3 | 258 | 256 |
| 31 | 1 | 263 | 279 |
| 32 | 1 | 264 | 278 |
| 33 | 1 | 265 | 284 |
| 34 | 1 | 266 | 282 |
| 35 | 1 | 303 | 318 |
| 36 | 1 | 304 | 317 |
| 37 | 1 | 305 | 323 |
| 38 | 2 | 306 | 321 |
| 39 | 3 | 343 | 339 |
| 40 | 3 | 344 | 342 |
| 41 | 1 | 349 | 365 |
| 42 | 1 | 350 | 364 |
| 43 | 1 | 351 | 370 |
| 44 | 1 | 352 | 368 |
| 45 | 1 | 389 | 404 |
| 46 | 1 | 390 | 403 |
| 47 | 1 | 391 | 409 |
| 48 | 2 | 392 | 407 |
| 49 | 3 | 429 | 425 |
| 50 | 3 | 430 | 428 |
| 51 | 1 | 435 | 451 |
| 52 | 1 | 436 | 450 |
| 53 | 1 | 437 | 456 |
| 54 | 1 | 438 | 454 |
| 55 | 1 | 475 | 490 |
| 56 | 1 | 476 | 489 |
| 57 | 1 | 477 | 495 |
| 58 | 2 | 478 | 493 |
| 59 | 3 | 515 | 511 |
| 60 | 3 | 516 | 514 |
| 61 | 1 | 521 | 537 |
| 62 | 1 | 522 | 536 |
| 63 | 1 | 523 | 542 |
| 64 | 1 | 524 | 540 |
| 65 | 1 | 561 | 576 |

66 1 562 575  
67 1 563 581  
68 2 564 579  
69 3 601 597  
70 3 602 600  
71 1 607 623  
72 1 608 622  
73 1 609 628  
74 1 610 626  
75 1 647 662  
76 1 648 661  
77 1 649 667  
78 2 650 665  
79 3 687 683  
80 3 688 686  
81 1 693 709  
82 1 694 708  
83 1 695 714  
84 1 696 712  
85 1 733 748  
86 1 734 747  
87 1 735 753  
88 2 736 751  
89 3 773 769  
90 3 774 772  
91 1 779 795  
92 1 780 794  
93 1 781 800  
94 1 782 798  
95 1 819 834  
96 1 820 833  
97 1 821 839  
98 2 822 837  
99 3 859 855  
100 3 860 858  
101 1 865 881  
102 1 866 880  
103 1 867 886  
104 1 868 884  
105 1 905 920  
106 1 906 919  
107 1 907 925  
108 2 908 923  
109 3 945 941  
110 3 946 944  
111 1 951 967  
112 1 952 966  
113 1 953 972  
114 1 954 970  
115 1 991 1006  
116 1 992 1005  
117 1 993 1011  
118 2 994 1009  
119 3 1031 1027  
120 3 1032 1030  
121 1 1037 1053  
122 1 1038 1052  
123 1 1039 1058  
124 1 1040 1056  
125 1 1077 1092  
126 1 1078 1091  
127 1 1079 1097  
128 2 1080 1095  
129 3 1117 1113  
130 3 1118 1116  
131 1 1123 1139  
132 1 1124 1138  
133 1 1125 1144  
134 1 1126 1142  
135 1 1163 1178  
136 1 1164 1177  
137 1 1165 1183  
138 2 1166 1181  
139 3 1203 1199  
140 3 1204 1202  
141 1 1209 1225  
142 1 1210 1224  
143 1 1211 1230  
144 1 1212 1228  
145 1 1249 1264  
146 1 1250 1263  
147 1 1251 1269  
148 2 1252 1267  
149 3 1289 1285  
150 3 1290 1288  
151 1 1295 1311  
152 1 1296 1310  
153 1 1297 1316  
154 1 1298 1314  
155 1 1335 1350  
156 1 1336 1349  
157 1 1337 1355  
158 2 1338 1353

159 3 1375 1371  
160 3 1376 1374  
161 1 1381 1397  
162 1 1382 1396  
163 1 1383 1402  
164 1 1384 1400  
165 1 1421 1436  
166 1 1422 1435  
167 1 1423 1441  
168 2 1424 1439  
169 3 1461 1457  
170 3 1462 1460  
171 1 1467 1483  
172 1 1468 1482  
173 1 1469 1488  
174 1 1470 1486  
175 1 1507 1522  
176 1 1508 1521  
177 1 1509 1527  
178 2 1510 1525  
179 3 1547 1543  
180 3 1548 1546  
181 1 1553 1569  
182 1 1554 1568  
183 1 1555 1574  
184 1 1556 1572  
185 1 1593 1608  
186 1 1594 1607  
187 1 1595 1613  
188 2 1596 1611  
189 3 1633 1629  
190 3 1634 1632  
191 1 1639 1655  
192 1 1640 1654  
193 1 1641 1660  
194 1 1642 1658  
195 1 1679 1694  
196 1 1680 1693  
197 1 1681 1699  
198 2 1682 1697  
199 3 1719 1715  
200 3 1720 1718  
201 1 1725 1741  
202 1 1726 1740  
203 1 1727 1746  
204 1 1728 1744  
205 1 1765 1780  
206 1 1766 1779  
207 1 1767 1785  
208 2 1768 1783  
209 3 1805 1801  
210 3 1806 1804  
211 1 1811 1827  
212 1 1812 1826  
213 1 1813 1832  
214 1 1814 1830  
215 1 1851 1866  
216 1 1852 1865  
217 1 1853 1871  
218 2 1854 1869  
219 3 1891 1887  
220 3 1892 1890  
221 1 1897 1913  
222 1 1898 1912  
223 1 1899 1918  
224 1 1900 1916  
225 1 1937 1952  
226 1 1938 1951  
227 1 1939 1957  
228 2 1940 1955  
229 3 1977 1973  
230 3 1978 1976  
231 1 1983 1999  
232 1 1984 1998  
233 1 1985 2004  
234 1 1986 2002  
235 1 2023 2038  
236 1 2024 2037  
237 1 2025 2043  
238 2 2026 2041  
239 3 2063 2059  
240 3 2064 2062  
241 3 2144 2065  
242 2 2070 2084  
243 1 2071 2083  
244 1 2072 2088  
245 1 2073 2086  
246 1 2106 2122  
247 1 2107 2121  
248 1 2108 2127  
249 1 2109 2125  
250 3 2143 2142  
251 3 2224 2145

252 2 2150 2164  
253 1 2151 2163  
254 1 2152 2168  
255 1 2153 2166  
256 1 2186 2202  
257 1 2187 2201  
258 1 2188 2207  
259 1 2189 2205  
260 3 2223 2222  
261 3 2304 2225  
262 2 2230 2244  
263 1 2231 2243  
264 1 2232 2248  
265 1 2233 2246  
266 1 2266 2282  
267 1 2267 2281  
268 1 2268 2287  
269 1 2269 2285  
270 3 2303 2302  
271 3 2384 2305  
272 2 2310 2324  
273 1 2311 2323  
274 1 2312 2328  
275 1 2313 2326  
276 1 2346 2362  
277 1 2347 2361  
278 1 2348 2367  
279 1 2349 2365  
280 3 2383 2382  
281 3 2464 2385  
282 2 2390 2404  
283 1 2391 2403  
284 1 2392 2408  
285 1 2393 2406  
286 1 2426 2442  
287 1 2427 2441  
288 1 2428 2447  
289 1 2429 2445  
290 3 2463 2462  
291 3 2544 2465  
292 2 2470 2484  
293 1 2471 2483  
294 1 2472 2488  
295 1 2473 2486  
296 1 2506 2522  
297 1 2507 2521  
298 1 2508 2527  
299 1 2509 2525  
300 3 2543 2542  
301 3 2624 2545  
302 2 2550 2564  
303 1 2551 2563  
304 1 2552 2568  
305 1 2553 2566  
306 1 2586 2602  
307 1 2587 2601  
308 1 2588 2607  
309 1 2589 2605  
310 3 2623 2622  
311 3 2704 2625  
312 2 2630 2644  
313 1 2631 2643  
314 1 2632 2648  
315 1 2633 2646  
316 1 2666 2682  
317 1 2667 2681  
318 1 2668 2687  
319 1 2669 2685  
320 3 2703 2702  
321 3 2784 2705  
322 2 2710 2724  
323 1 2711 2723  
324 1 2712 2728  
325 1 2713 2726  
326 1 2746 2762  
327 1 2747 2761  
328 1 2748 2767  
329 1 2749 2765  
330 3 2783 2782  
331 3 2864 2785  
332 2 2790 2804  
333 1 2791 2803  
334 1 2792 2808  
335 1 2793 2806  
336 1 2826 2842  
337 1 2827 2841  
338 1 2828 2847  
339 1 2829 2845  
340 3 2863 2862  
341 3 2944 2865  
342 2 2870 2884  
343 1 2871 2883  
344 1 2872 2888

345 1 2873 2886  
346 1 2906 2922  
347 1 2907 2921  
348 1 2908 2927  
349 1 2909 2925  
350 3 2943 2942  
351 3 3024 2945  
352 2 2950 2964  
353 1 2951 2963  
354 1 2952 2968  
355 1 2953 2966  
356 1 2986 3002  
357 1 2987 3001  
358 1 2988 3007  
359 1 2989 3005  
360 3 3023 3022  
361 3 3104 3025  
362 2 3030 3044  
363 1 3031 3043  
364 1 3032 3048  
365 1 3033 3046  
366 1 3066 3082  
367 1 3067 3081  
368 1 3068 3087  
369 1 3069 3085  
370 3 3103 3102  
371 3 3184 3105  
372 2 3110 3124  
373 1 3111 3123  
374 1 3112 3128  
375 1 3113 3126  
376 1 3146 3162  
377 1 3147 3161  
378 1 3148 3167  
379 1 3149 3165  
380 3 3183 3182  
381 3 3264 3185  
382 2 3190 3204  
383 1 3191 3203  
384 1 3192 3208  
385 1 3193 3206  
386 1 3226 3242  
387 1 3227 3241  
388 1 3228 3247  
389 1 3229 3245  
390 3 3263 3262  
391 3 3344 3265  
392 2 3270 3284  
393 1 3271 3283  
394 1 3272 3288  
395 1 3273 3286  
396 1 3306 3322  
397 1 3307 3321  
398 1 3308 3327  
399 1 3309 3325  
400 3 3343 3342  
401 3 3424 3345  
402 2 3350 3364  
403 1 3351 3363  
404 1 3352 3368  
405 1 3353 3366  
406 1 3386 3402  
407 1 3387 3401  
408 1 3388 3407  
409 1 3389 3405  
410 3 3423 3422  
411 3 3504 3425  
412 2 3430 3444  
413 1 3431 3443  
414 1 3432 3448  
415 1 3433 3446  
416 1 3466 3482  
417 1 3467 3481  
418 1 3468 3487  
419 1 3469 3485  
420 3 3503 3502  
421 3 3584 3505  
422 2 3510 3524  
423 1 3511 3523  
424 1 3512 3528  
425 1 3513 3526  
426 1 3546 3562  
427 1 3547 3561  
428 1 3548 3567  
429 1 3549 3565  
430 3 3583 3582  
431 3 3664 3585  
432 2 3590 3604  
433 1 3591 3603  
434 1 3592 3608  
435 1 3593 3606  
436 1 3626 3642  
437 1 3627 3641

|     |   |      |      |
|-----|---|------|------|
| 438 | 1 | 3628 | 3647 |
| 439 | 1 | 3629 | 3645 |
| 440 | 3 | 3663 | 3662 |
| 441 | 3 | 3744 | 3665 |
| 442 | 2 | 3670 | 3684 |
| 443 | 1 | 3671 | 3683 |
| 444 | 1 | 3672 | 3688 |
| 445 | 1 | 3673 | 3686 |
| 446 | 1 | 3706 | 3722 |
| 447 | 1 | 3707 | 3721 |
| 448 | 1 | 3708 | 3727 |
| 449 | 1 | 3709 | 3725 |
| 450 | 3 | 3743 | 3742 |
| 451 | 3 | 3824 | 3745 |
| 452 | 2 | 3750 | 3764 |
| 453 | 1 | 3751 | 3763 |
| 454 | 1 | 3752 | 3768 |
| 455 | 1 | 3753 | 3766 |
| 456 | 1 | 3786 | 3802 |
| 457 | 1 | 3787 | 3801 |
| 458 | 1 | 3788 | 3807 |
| 459 | 1 | 3789 | 3805 |
| 460 | 3 | 3823 | 3822 |
| 461 | 3 | 3904 | 3825 |
| 462 | 2 | 3830 | 3844 |
| 463 | 1 | 3831 | 3843 |
| 464 | 1 | 3832 | 3848 |
| 465 | 1 | 3833 | 3846 |
| 466 | 1 | 3866 | 3882 |
| 467 | 1 | 3867 | 3881 |
| 468 | 1 | 3868 | 3887 |
| 469 | 1 | 3869 | 3885 |
| 470 | 3 | 3903 | 3902 |
| 471 | 3 | 3984 | 3905 |
| 472 | 2 | 3910 | 3924 |
| 473 | 1 | 3911 | 3923 |
| 474 | 1 | 3912 | 3928 |
| 475 | 1 | 3913 | 3926 |
| 476 | 1 | 3946 | 3962 |
| 477 | 1 | 3947 | 3961 |
| 478 | 1 | 3948 | 3967 |
| 479 | 1 | 3949 | 3965 |
| 480 | 3 | 3983 | 3982 |

Angles

|    |   |     |     |     |
|----|---|-----|-----|-----|
| 1  | 1 | 1   | 20  | 6   |
| 2  | 1 | 3   | 20  | 6   |
| 3  | 1 | 2   | 21  | 5   |
| 4  | 1 | 4   | 21  | 5   |
| 5  | 1 | 1   | 24  | 8   |
| 6  | 1 | 3   | 24  | 8   |
| 7  | 1 | 2   | 26  | 7   |
| 8  | 1 | 4   | 26  | 7   |
| 9  | 1 | 41  | 59  | 46  |
| 10 | 1 | 43  | 59  | 46  |
| 11 | 1 | 42  | 60  | 45  |
| 12 | 1 | 44  | 60  | 45  |
| 13 | 2 | 41  | 63  | 48  |
| 14 | 2 | 43  | 63  | 48  |
| 15 | 1 | 42  | 65  | 47  |
| 16 | 1 | 44  | 65  | 47  |
| 17 | 3 | 83  | 81  | 85  |
| 18 | 3 | 76  | 84  | 86  |
| 19 | 1 | 87  | 106 | 92  |
| 20 | 1 | 89  | 106 | 92  |
| 21 | 1 | 88  | 107 | 91  |
| 22 | 1 | 90  | 107 | 91  |
| 23 | 1 | 87  | 110 | 94  |
| 24 | 1 | 89  | 110 | 94  |
| 25 | 1 | 88  | 112 | 93  |
| 26 | 1 | 90  | 112 | 93  |
| 27 | 1 | 127 | 145 | 132 |
| 28 | 1 | 129 | 145 | 132 |
| 29 | 1 | 128 | 146 | 131 |
| 30 | 1 | 130 | 146 | 131 |
| 31 | 2 | 127 | 149 | 134 |
| 32 | 2 | 129 | 149 | 134 |
| 33 | 1 | 128 | 151 | 133 |
| 34 | 1 | 130 | 151 | 133 |
| 35 | 3 | 169 | 167 | 171 |
| 36 | 3 | 162 | 170 | 172 |
| 37 | 1 | 173 | 192 | 178 |
| 38 | 1 | 175 | 192 | 178 |
| 39 | 1 | 174 | 193 | 177 |
| 40 | 1 | 176 | 193 | 177 |
| 41 | 1 | 173 | 196 | 180 |
| 42 | 1 | 175 | 196 | 180 |
| 43 | 1 | 174 | 198 | 179 |
| 44 | 1 | 176 | 198 | 179 |
| 45 | 1 | 213 | 231 | 218 |
| 46 | 1 | 215 | 231 | 218 |
| 47 | 1 | 214 | 232 | 217 |

|     |   |     |     |     |
|-----|---|-----|-----|-----|
| 48  | 1 | 216 | 232 | 217 |
| 49  | 2 | 213 | 235 | 220 |
| 50  | 2 | 215 | 235 | 220 |
| 51  | 1 | 214 | 237 | 219 |
| 52  | 1 | 216 | 237 | 219 |
| 53  | 3 | 255 | 253 | 257 |
| 54  | 3 | 248 | 256 | 258 |
| 55  | 1 | 259 | 278 | 264 |
| 56  | 1 | 261 | 278 | 264 |
| 57  | 1 | 260 | 279 | 263 |
| 58  | 1 | 262 | 279 | 263 |
| 59  | 1 | 259 | 282 | 266 |
| 60  | 1 | 261 | 282 | 266 |
| 61  | 1 | 260 | 284 | 265 |
| 62  | 1 | 262 | 284 | 265 |
| 63  | 1 | 299 | 317 | 304 |
| 64  | 1 | 301 | 317 | 304 |
| 65  | 1 | 300 | 318 | 303 |
| 66  | 1 | 302 | 318 | 303 |
| 67  | 2 | 299 | 321 | 306 |
| 68  | 2 | 301 | 321 | 306 |
| 69  | 1 | 300 | 323 | 305 |
| 70  | 1 | 302 | 323 | 305 |
| 71  | 3 | 341 | 339 | 343 |
| 72  | 3 | 334 | 342 | 344 |
| 73  | 1 | 345 | 364 | 350 |
| 74  | 1 | 347 | 364 | 350 |
| 75  | 1 | 346 | 365 | 349 |
| 76  | 1 | 348 | 365 | 349 |
| 77  | 1 | 345 | 368 | 352 |
| 78  | 1 | 347 | 368 | 352 |
| 79  | 1 | 346 | 370 | 351 |
| 80  | 1 | 348 | 370 | 351 |
| 81  | 1 | 385 | 403 | 390 |
| 82  | 1 | 387 | 403 | 390 |
| 83  | 1 | 386 | 404 | 389 |
| 84  | 1 | 388 | 404 | 389 |
| 85  | 2 | 385 | 407 | 392 |
| 86  | 2 | 387 | 407 | 392 |
| 87  | 1 | 386 | 409 | 391 |
| 88  | 1 | 388 | 409 | 391 |
| 89  | 3 | 427 | 425 | 429 |
| 90  | 3 | 420 | 428 | 430 |
| 91  | 1 | 431 | 450 | 436 |
| 92  | 1 | 433 | 450 | 436 |
| 93  | 1 | 432 | 451 | 435 |
| 94  | 1 | 434 | 451 | 435 |
| 95  | 1 | 431 | 454 | 438 |
| 96  | 1 | 433 | 454 | 438 |
| 97  | 1 | 432 | 456 | 437 |
| 98  | 1 | 434 | 456 | 437 |
| 99  | 1 | 471 | 489 | 476 |
| 100 | 1 | 473 | 489 | 476 |
| 101 | 1 | 472 | 490 | 475 |
| 102 | 1 | 474 | 490 | 475 |
| 103 | 2 | 471 | 493 | 478 |
| 104 | 2 | 473 | 493 | 478 |
| 105 | 1 | 472 | 495 | 477 |
| 106 | 1 | 474 | 495 | 477 |
| 107 | 3 | 513 | 511 | 515 |
| 108 | 3 | 506 | 514 | 516 |
| 109 | 1 | 517 | 536 | 522 |
| 110 | 1 | 519 | 536 | 522 |
| 111 | 1 | 518 | 537 | 521 |
| 112 | 1 | 520 | 537 | 521 |
| 113 | 1 | 517 | 540 | 524 |
| 114 | 1 | 519 | 540 | 524 |
| 115 | 1 | 518 | 542 | 523 |
| 116 | 1 | 520 | 542 | 523 |
| 117 | 1 | 557 | 575 | 562 |
| 118 | 1 | 559 | 575 | 562 |
| 119 | 1 | 558 | 576 | 561 |
| 120 | 1 | 560 | 576 | 561 |
| 121 | 2 | 557 | 579 | 564 |
| 122 | 2 | 559 | 579 | 564 |
| 123 | 1 | 558 | 581 | 563 |
| 124 | 1 | 560 | 581 | 563 |
| 125 | 3 | 599 | 597 | 601 |
| 126 | 3 | 592 | 600 | 602 |
| 127 | 1 | 603 | 622 | 608 |
| 128 | 1 | 605 | 622 | 608 |
| 129 | 1 | 604 | 623 | 607 |
| 130 | 1 | 606 | 623 | 607 |
| 131 | 1 | 603 | 626 | 610 |
| 132 | 1 | 605 | 626 | 610 |
| 133 | 1 | 604 | 628 | 609 |
| 134 | 1 | 606 | 628 | 609 |
| 135 | 1 | 643 | 661 | 648 |
| 136 | 1 | 645 | 661 | 648 |
| 137 | 1 | 644 | 662 | 647 |
| 138 | 1 | 646 | 662 | 647 |
| 139 | 2 | 643 | 665 | 650 |
| 140 | 2 | 645 | 665 | 650 |



|     |   |      |      |      |
|-----|---|------|------|------|
| 141 | 1 | 644  | 667  | 649  |
| 142 | 1 | 646  | 667  | 649  |
| 143 | 3 | 685  | 683  | 687  |
| 144 | 3 | 678  | 686  | 688  |
| 145 | 1 | 689  | 708  | 694  |
| 146 | 1 | 691  | 708  | 694  |
| 147 | 1 | 690  | 709  | 693  |
| 148 | 1 | 692  | 709  | 693  |
| 149 | 1 | 689  | 712  | 696  |
| 150 | 1 | 691  | 712  | 696  |
| 151 | 1 | 690  | 714  | 695  |
| 152 | 1 | 692  | 714  | 695  |
| 153 | 1 | 729  | 747  | 734  |
| 154 | 1 | 731  | 747  | 734  |
| 155 | 1 | 730  | 748  | 733  |
| 156 | 1 | 732  | 748  | 733  |
| 157 | 2 | 729  | 751  | 736  |
| 158 | 2 | 731  | 751  | 736  |
| 159 | 1 | 730  | 753  | 735  |
| 160 | 1 | 732  | 753  | 735  |
| 161 | 3 | 771  | 769  | 773  |
| 162 | 3 | 764  | 772  | 774  |
| 163 | 1 | 775  | 794  | 780  |
| 164 | 1 | 777  | 794  | 780  |
| 165 | 1 | 776  | 795  | 779  |
| 166 | 1 | 778  | 795  | 779  |
| 167 | 1 | 775  | 798  | 782  |
| 168 | 1 | 777  | 798  | 782  |
| 169 | 1 | 776  | 800  | 781  |
| 170 | 1 | 778  | 800  | 781  |
| 171 | 1 | 815  | 833  | 820  |
| 172 | 1 | 817  | 833  | 820  |
| 173 | 1 | 816  | 834  | 819  |
| 174 | 1 | 818  | 834  | 819  |
| 175 | 2 | 815  | 837  | 822  |
| 176 | 2 | 817  | 837  | 822  |
| 177 | 1 | 816  | 839  | 821  |
| 178 | 1 | 818  | 839  | 821  |
| 179 | 3 | 857  | 855  | 859  |
| 180 | 3 | 850  | 858  | 860  |
| 181 | 1 | 861  | 880  | 866  |
| 182 | 1 | 863  | 880  | 866  |
| 183 | 1 | 862  | 881  | 865  |
| 184 | 1 | 864  | 881  | 865  |
| 185 | 1 | 861  | 884  | 868  |
| 186 | 1 | 863  | 884  | 868  |
| 187 | 1 | 862  | 886  | 867  |
| 188 | 1 | 864  | 886  | 867  |
| 189 | 1 | 901  | 919  | 906  |
| 190 | 1 | 903  | 919  | 906  |
| 191 | 1 | 902  | 920  | 905  |
| 192 | 1 | 904  | 920  | 905  |
| 193 | 2 | 901  | 923  | 908  |
| 194 | 2 | 903  | 923  | 908  |
| 195 | 1 | 902  | 925  | 907  |
| 196 | 1 | 904  | 925  | 907  |
| 197 | 3 | 943  | 941  | 945  |
| 198 | 3 | 936  | 944  | 946  |
| 199 | 1 | 947  | 966  | 952  |
| 200 | 1 | 949  | 966  | 952  |
| 201 | 1 | 948  | 967  | 951  |
| 202 | 1 | 950  | 967  | 951  |
| 203 | 1 | 947  | 970  | 954  |
| 204 | 1 | 949  | 970  | 954  |
| 205 | 1 | 948  | 972  | 953  |
| 206 | 1 | 950  | 972  | 953  |
| 207 | 1 | 987  | 1005 | 992  |
| 208 | 1 | 989  | 1005 | 992  |
| 209 | 1 | 988  | 1006 | 991  |
| 210 | 1 | 990  | 1006 | 991  |
| 211 | 2 | 987  | 1009 | 994  |
| 212 | 2 | 989  | 1009 | 994  |
| 213 | 1 | 988  | 1011 | 993  |
| 214 | 1 | 990  | 1011 | 993  |
| 215 | 3 | 1029 | 1027 | 1031 |
| 216 | 3 | 1022 | 1030 | 1032 |
| 217 | 1 | 1033 | 1052 | 1038 |
| 218 | 1 | 1035 | 1052 | 1038 |
| 219 | 1 | 1034 | 1053 | 1037 |
| 220 | 1 | 1036 | 1053 | 1037 |
| 221 | 1 | 1033 | 1056 | 1040 |
| 222 | 1 | 1035 | 1056 | 1040 |
| 223 | 1 | 1034 | 1058 | 1039 |
| 224 | 1 | 1036 | 1058 | 1039 |
| 225 | 1 | 1073 | 1091 | 1078 |
| 226 | 1 | 1075 | 1091 | 1078 |
| 227 | 1 | 1074 | 1092 | 1077 |
| 228 | 1 | 1076 | 1092 | 1077 |
| 229 | 2 | 1073 | 1095 | 1080 |
| 230 | 2 | 1075 | 1095 | 1080 |
| 231 | 1 | 1074 | 1097 | 1079 |
| 232 | 1 | 1076 | 1097 | 1079 |
| 233 | 3 | 1115 | 1113 | 1117 |

|     |   |      |      |      |
|-----|---|------|------|------|
| 234 | 3 | 1108 | 1116 | 1118 |
| 235 | 1 | 1119 | 1138 | 1124 |
| 236 | 1 | 1121 | 1138 | 1124 |
| 237 | 1 | 1120 | 1139 | 1123 |
| 238 | 1 | 1122 | 1139 | 1123 |
| 239 | 1 | 1119 | 1142 | 1126 |
| 240 | 1 | 1121 | 1142 | 1126 |
| 241 | 1 | 1120 | 1144 | 1125 |
| 242 | 1 | 1122 | 1144 | 1125 |
| 243 | 1 | 1159 | 1177 | 1164 |
| 244 | 1 | 1161 | 1177 | 1164 |
| 245 | 1 | 1160 | 1178 | 1163 |
| 246 | 1 | 1162 | 1178 | 1163 |
| 247 | 2 | 1159 | 1181 | 1166 |
| 248 | 2 | 1161 | 1181 | 1166 |
| 249 | 1 | 1160 | 1183 | 1165 |
| 250 | 1 | 1162 | 1183 | 1165 |
| 251 | 3 | 1201 | 1199 | 1203 |
| 252 | 3 | 1194 | 1202 | 1204 |
| 253 | 1 | 1205 | 1224 | 1210 |
| 254 | 1 | 1207 | 1224 | 1210 |
| 255 | 1 | 1206 | 1225 | 1209 |
| 256 | 1 | 1208 | 1225 | 1209 |
| 257 | 1 | 1205 | 1228 | 1212 |
| 258 | 1 | 1207 | 1228 | 1212 |
| 259 | 1 | 1206 | 1230 | 1211 |
| 260 | 1 | 1208 | 1230 | 1211 |
| 261 | 1 | 1245 | 1263 | 1250 |
| 262 | 1 | 1247 | 1263 | 1250 |
| 263 | 1 | 1246 | 1264 | 1249 |
| 264 | 1 | 1248 | 1264 | 1249 |
| 265 | 2 | 1245 | 1267 | 1252 |
| 266 | 2 | 1247 | 1267 | 1252 |
| 267 | 1 | 1246 | 1269 | 1251 |
| 268 | 1 | 1248 | 1269 | 1251 |
| 269 | 3 | 1287 | 1285 | 1289 |
| 270 | 3 | 1280 | 1288 | 1290 |
| 271 | 1 | 1291 | 1310 | 1296 |
| 272 | 1 | 1293 | 1310 | 1296 |
| 273 | 1 | 1292 | 1311 | 1295 |
| 274 | 1 | 1294 | 1311 | 1295 |
| 275 | 1 | 1291 | 1314 | 1298 |
| 276 | 1 | 1293 | 1314 | 1298 |
| 277 | 1 | 1292 | 1316 | 1297 |
| 278 | 1 | 1294 | 1316 | 1297 |
| 279 | 1 | 1331 | 1349 | 1336 |
| 280 | 1 | 1333 | 1349 | 1336 |
| 281 | 1 | 1332 | 1350 | 1335 |
| 282 | 1 | 1334 | 1350 | 1335 |
| 283 | 2 | 1331 | 1353 | 1338 |
| 284 | 2 | 1333 | 1353 | 1338 |
| 285 | 1 | 1332 | 1355 | 1337 |
| 286 | 1 | 1334 | 1355 | 1337 |
| 287 | 3 | 1373 | 1371 | 1375 |
| 288 | 3 | 1366 | 1374 | 1376 |
| 289 | 1 | 1377 | 1396 | 1382 |
| 290 | 1 | 1379 | 1396 | 1382 |
| 291 | 1 | 1378 | 1397 | 1381 |
| 292 | 1 | 1380 | 1397 | 1381 |
| 293 | 1 | 1377 | 1400 | 1384 |
| 294 | 1 | 1379 | 1400 | 1384 |
| 295 | 1 | 1378 | 1402 | 1383 |
| 296 | 1 | 1380 | 1402 | 1383 |
| 297 | 1 | 1417 | 1435 | 1422 |
| 298 | 1 | 1419 | 1435 | 1422 |
| 299 | 1 | 1418 | 1436 | 1421 |
| 300 | 1 | 1420 | 1436 | 1421 |
| 301 | 2 | 1417 | 1439 | 1424 |
| 302 | 2 | 1419 | 1439 | 1424 |
| 303 | 1 | 1418 | 1441 | 1423 |
| 304 | 1 | 1420 | 1441 | 1423 |
| 305 | 3 | 1459 | 1457 | 1461 |
| 306 | 3 | 1452 | 1460 | 1462 |
| 307 | 1 | 1463 | 1482 | 1468 |
| 308 | 1 | 1465 | 1482 | 1468 |
| 309 | 1 | 1464 | 1483 | 1467 |
| 310 | 1 | 1466 | 1483 | 1467 |
| 311 | 1 | 1463 | 1486 | 1470 |
| 312 | 1 | 1465 | 1486 | 1470 |
| 313 | 1 | 1464 | 1488 | 1469 |
| 314 | 1 | 1466 | 1488 | 1469 |
| 315 | 1 | 1503 | 1521 | 1508 |
| 316 | 1 | 1505 | 1521 | 1508 |
| 317 | 1 | 1504 | 1522 | 1507 |
| 318 | 1 | 1506 | 1522 | 1507 |
| 319 | 2 | 1503 | 1525 | 1510 |
| 320 | 2 | 1505 | 1525 | 1510 |
| 321 | 1 | 1504 | 1527 | 1509 |
| 322 | 1 | 1506 | 1527 | 1509 |
| 323 | 3 | 1545 | 1543 | 1547 |
| 324 | 3 | 1538 | 1546 | 1548 |
| 325 | 1 | 1549 | 1568 | 1554 |
| 326 | 1 | 1551 | 1568 | 1554 |

327 1 1550 1569 1553  
328 1 1552 1569 1553  
329 1 1549 1572 1556  
330 1 1551 1572 1556  
331 1 1550 1574 1555  
332 1 1552 1574 1555  
333 1 1589 1607 1594  
334 1 1591 1607 1594  
335 1 1590 1608 1593  
336 1 1592 1608 1593  
337 2 1589 1611 1596  
338 2 1591 1611 1596  
339 1 1590 1613 1595  
340 1 1592 1613 1595  
341 3 1631 1629 1633  
342 3 1624 1632 1634  
343 1 1635 1654 1640  
344 1 1637 1654 1640  
345 1 1636 1655 1639  
346 1 1638 1655 1639  
347 1 1635 1658 1642  
348 1 1637 1658 1642  
349 1 1636 1660 1641  
350 1 1638 1660 1641  
351 1 1675 1693 1680  
352 1 1677 1693 1680  
353 1 1676 1694 1679  
354 1 1678 1694 1679  
355 2 1675 1697 1682  
356 2 1677 1697 1682  
357 1 1676 1699 1681  
358 1 1678 1699 1681  
359 3 1717 1715 1719  
360 3 1710 1718 1720  
361 1 1721 1740 1726  
362 1 1723 1740 1726  
363 1 1722 1741 1725  
364 1 1724 1741 1725  
365 1 1721 1744 1728  
366 1 1723 1744 1728  
367 1 1722 1746 1727  
368 1 1724 1746 1727  
369 1 1761 1779 1766  
370 1 1763 1779 1766  
371 1 1762 1780 1765  
372 1 1764 1780 1765  
373 2 1761 1783 1768  
374 2 1763 1783 1768  
375 1 1762 1785 1767  
376 1 1764 1785 1767  
377 3 1803 1801 1805  
378 3 1796 1804 1806  
379 1 1807 1826 1812  
380 1 1809 1826 1812  
381 1 1808 1827 1811  
382 1 1810 1827 1811  
383 1 1807 1830 1814  
384 1 1809 1830 1814  
385 1 1808 1832 1813  
386 1 1810 1832 1813  
387 1 1847 1865 1852  
388 1 1849 1865 1852  
389 1 1848 1866 1851  
390 1 1850 1866 1851  
391 2 1847 1869 1854  
392 2 1849 1869 1854  
393 1 1848 1871 1853  
394 1 1850 1871 1853  
395 3 1889 1887 1891  
396 3 1882 1890 1892  
397 1 1893 1912 1898  
398 1 1895 1912 1898  
399 1 1894 1913 1897  
400 1 1896 1913 1897  
401 1 1893 1916 1900  
402 1 1895 1916 1900  
403 1 1894 1918 1899  
404 1 1896 1918 1899  
405 1 1933 1951 1938  
406 1 1935 1951 1938  
407 1 1934 1952 1937  
408 1 1936 1952 1937  
409 2 1933 1955 1940  
410 2 1935 1955 1940  
411 1 1934 1957 1939  
412 1 1936 1957 1939  
413 3 1975 1973 1977  
414 3 1968 1976 1978  
415 1 1979 1998 1984  
416 1 1981 1998 1984  
417 1 1980 1999 1983  
418 1 1982 1999 1983  
419 1 1979 2002 1986

420 1 1981 2002 1986  
421 1 1980 2004 1985  
422 1 1982 2004 1985  
423 1 2019 2037 2024  
424 1 2021 2037 2024  
425 1 2020 2038 2023  
426 1 2022 2038 2023  
427 2 2019 2041 2026  
428 2 2021 2041 2026  
429 1 2020 2043 2025  
430 1 2022 2043 2025  
431 3 2061 2059 2063  
432 3 2054 2062 2064  
433 3 2097 2065 2144  
434 1 2066 2083 2071  
435 1 2068 2083 2071  
436 2 2067 2084 2070  
437 2 2069 2084 2070  
438 1 2066 2086 2073  
439 1 2068 2086 2073  
440 1 2067 2088 2072  
441 1 2069 2088 2072  
442 1 2102 2121 2107  
443 1 2104 2121 2107  
444 1 2103 2122 2106  
445 1 2105 2122 2106  
446 1 2102 2125 2109  
447 1 2104 2125 2109  
448 1 2103 2127 2108  
449 1 2105 2127 2108  
450 3 2095 2142 2143  
451 3 2177 2145 2224  
452 1 2146 2163 2151  
453 1 2148 2163 2151  
454 2 2147 2164 2150  
455 2 2149 2164 2150  
456 1 2146 2166 2153  
457 1 2148 2166 2153  
458 1 2147 2168 2152  
459 1 2149 2168 2152  
460 1 2182 2201 2187  
461 1 2184 2201 2187  
462 1 2183 2202 2186  
463 1 2185 2202 2186  
464 1 2182 2205 2189  
465 1 2184 2205 2189  
466 1 2183 2207 2188  
467 1 2185 2207 2188  
468 3 2175 2222 2223  
469 3 2257 2225 2304  
470 1 2226 2243 2231  
471 1 2228 2243 2231  
472 2 2227 2244 2230  
473 2 2229 2244 2230  
474 1 2226 2246 2233  
475 1 2228 2246 2233  
476 1 2227 2248 2232  
477 1 2229 2248 2232  
478 1 2262 2281 2267  
479 1 2264 2281 2267  
480 1 2263 2282 2266  
481 1 2265 2282 2266  
482 1 2262 2285 2269  
483 1 2264 2285 2269  
484 1 2263 2287 2268  
485 1 2265 2287 2268  
486 3 2255 2302 2303  
487 3 2337 2305 2384  
488 1 2306 2323 2311  
489 1 2308 2323 2311  
490 2 2307 2324 2310  
491 2 2309 2324 2310  
492 1 2306 2326 2313  
493 1 2308 2326 2313  
494 1 2307 2328 2312  
495 1 2309 2328 2312  
496 1 2342 2361 2347  
497 1 2344 2361 2347  
498 1 2343 2362 2346  
499 1 2345 2362 2346  
500 1 2342 2365 2349  
501 1 2344 2365 2349  
502 1 2343 2367 2348  
503 1 2345 2367 2348  
504 3 2335 2382 2383  
505 3 2417 2385 2464  
506 1 2386 2403 2391  
507 1 2388 2403 2391  
508 2 2387 2404 2390  
509 2 2389 2404 2390  
510 1 2386 2406 2393  
511 1 2388 2406 2393  
512 1 2387 2408 2392

513 1 2389 2408 2392  
514 1 2422 2441 2427  
515 1 2424 2441 2427  
516 1 2423 2442 2426  
517 1 2425 2442 2426  
518 1 2422 2445 2429  
519 1 2424 2445 2429  
520 1 2423 2447 2428  
521 1 2425 2447 2428  
522 3 2415 2462 2463  
523 3 2497 2465 2544  
524 1 2466 2483 2471  
525 1 2468 2483 2471  
526 2 2467 2484 2470  
527 2 2469 2484 2470  
528 1 2466 2486 2473  
529 1 2468 2486 2473  
530 1 2467 2488 2472  
531 1 2469 2488 2472  
532 1 2502 2521 2507  
533 1 2504 2521 2507  
534 1 2503 2522 2506  
535 1 2505 2522 2506  
536 1 2502 2525 2509  
537 1 2504 2525 2509  
538 1 2503 2527 2508  
539 1 2505 2527 2508  
540 3 2495 2542 2543  
541 3 2577 2545 2624  
542 1 2546 2563 2551  
543 1 2548 2563 2551  
544 2 2547 2564 2550  
545 2 2549 2564 2550  
546 1 2546 2566 2553  
547 1 2548 2566 2553  
548 1 2547 2568 2552  
549 1 2549 2568 2552  
550 1 2582 2601 2587  
551 1 2584 2601 2587  
552 1 2583 2602 2586  
553 1 2585 2602 2586  
554 1 2582 2605 2589  
555 1 2584 2605 2589  
556 1 2583 2607 2588  
557 1 2585 2607 2588  
558 3 2575 2622 2623  
559 3 2657 2625 2704  
560 1 2626 2643 2631  
561 1 2628 2643 2631  
562 2 2627 2644 2630  
563 2 2629 2644 2630  
564 1 2626 2646 2633  
565 1 2628 2646 2633  
566 1 2627 2648 2632  
567 1 2629 2648 2632  
568 1 2662 2681 2667  
569 1 2664 2681 2667  
570 1 2663 2682 2666  
571 1 2665 2682 2666  
572 1 2662 2685 2669  
573 1 2664 2685 2669  
574 1 2663 2687 2668  
575 1 2665 2687 2668  
576 3 2655 2702 2703  
577 3 2737 2705 2784  
578 1 2706 2723 2711  
579 1 2708 2723 2711  
580 2 2707 2724 2710  
581 2 2709 2724 2710  
582 1 2706 2726 2713  
583 1 2708 2726 2713  
584 1 2707 2728 2712  
585 1 2709 2728 2712  
586 1 2742 2761 2747  
587 1 2744 2761 2747  
588 1 2743 2762 2746  
589 1 2745 2762 2746  
590 1 2742 2765 2749  
591 1 2744 2765 2749  
592 1 2743 2767 2748  
593 1 2745 2767 2748  
594 3 2735 2782 2783  
595 3 2817 2785 2864  
596 1 2786 2803 2791  
597 1 2788 2803 2791  
598 2 2787 2804 2790  
599 2 2789 2804 2790  
600 1 2786 2806 2793  
601 1 2788 2806 2793  
602 1 2787 2808 2792  
603 1 2789 2808 2792  
604 1 2822 2841 2827  
605 1 2824 2841 2827

606 1 2823 2842 2826  
607 1 2825 2842 2826  
608 1 2822 2845 2829  
609 1 2824 2845 2829  
610 1 2823 2847 2828  
611 1 2825 2847 2828  
612 3 2815 2862 2863  
613 3 2897 2865 2944  
614 1 2866 2883 2871  
615 1 2868 2883 2871  
616 2 2867 2884 2870  
617 2 2869 2884 2870  
618 1 2866 2886 2873  
619 1 2868 2886 2873  
620 1 2867 2888 2872  
621 1 2869 2888 2872  
622 1 2902 2921 2907  
623 1 2904 2921 2907  
624 1 2903 2922 2906  
625 1 2905 2922 2906  
626 1 2902 2925 2909  
627 1 2904 2925 2909  
628 1 2903 2927 2908  
629 1 2905 2927 2908  
630 3 2895 2942 2943  
631 3 2977 2945 3024  
632 1 2946 2963 2951  
633 1 2948 2963 2951  
634 2 2947 2964 2950  
635 2 2949 2964 2950  
636 1 2946 2966 2953  
637 1 2948 2966 2953  
638 1 2947 2968 2952  
639 1 2949 2968 2952  
640 1 2982 3001 2987  
641 1 2984 3001 2987  
642 1 2983 3002 2986  
643 1 2985 3002 2986  
644 1 2982 3005 2989  
645 1 2984 3005 2989  
646 1 2983 3007 2988  
647 1 2985 3007 2988  
648 3 2975 3022 3023  
649 3 3057 3025 3104  
650 1 3026 3043 3031  
651 1 3028 3043 3031  
652 2 3027 3044 3030  
653 2 3029 3044 3030  
654 1 3026 3046 3033  
655 1 3028 3046 3033  
656 1 3027 3048 3032  
657 1 3029 3048 3032  
658 1 3062 3081 3067  
659 1 3064 3081 3067  
660 1 3063 3082 3066  
661 1 3065 3082 3066  
662 1 3062 3085 3069  
663 1 3064 3085 3069  
664 1 3063 3087 3068  
665 1 3065 3087 3068  
666 3 3055 3102 3103  
667 3 3137 3105 3184  
668 1 3106 3123 3111  
669 1 3108 3123 3111  
670 2 3107 3124 3110  
671 2 3109 3124 3110  
672 1 3106 3126 3113  
673 1 3108 3126 3113  
674 1 3107 3128 3112  
675 1 3109 3128 3112  
676 1 3142 3161 3147  
677 1 3144 3161 3147  
678 1 3143 3162 3146  
679 1 3145 3162 3146  
680 1 3142 3165 3149  
681 1 3144 3165 3149  
682 1 3143 3167 3148  
683 1 3145 3167 3148  
684 3 3135 3182 3183  
685 3 3217 3185 3264  
686 1 3186 3203 3191  
687 1 3188 3203 3191  
688 2 3187 3204 3190  
689 2 3189 3204 3190  
690 1 3186 3206 3193  
691 1 3188 3206 3193  
692 1 3187 3208 3192  
693 1 3189 3208 3192  
694 1 3222 3241 3227  
695 1 3224 3241 3227  
696 1 3223 3242 3226  
697 1 3225 3242 3226  
698 1 3222 3245 3229

699 1 3224 3245 3229  
700 1 3223 3247 3228  
701 1 3225 3247 3228  
702 3 3215 3262 3263  
703 3 3297 3265 3344  
704 1 3266 3283 3271  
705 1 3268 3283 3271  
706 2 3267 3284 3270  
707 2 3269 3284 3270  
708 1 3266 3286 3273  
709 1 3268 3286 3273  
710 1 3267 3288 3272  
711 1 3269 3288 3272  
712 1 3302 3321 3307  
713 1 3304 3321 3307  
714 1 3303 3322 3306  
715 1 3305 3322 3306  
716 1 3302 3325 3309  
717 1 3304 3325 3309  
718 1 3303 3327 3308  
719 1 3305 3327 3308  
720 3 3295 3342 3343  
721 3 3377 3345 3424  
722 1 3346 3363 3351  
723 1 3348 3363 3351  
724 2 3347 3364 3350  
725 2 3349 3364 3350  
726 1 3346 3366 3353  
727 1 3348 3366 3353  
728 1 3347 3368 3352  
729 1 3349 3368 3352  
730 1 3382 3401 3387  
731 1 3384 3401 3387  
732 1 3383 3402 3386  
733 1 3385 3402 3386  
734 1 3382 3405 3389  
735 1 3384 3405 3389  
736 1 3383 3407 3388  
737 1 3385 3407 3388  
738 3 3375 3422 3423  
739 3 3457 3425 3504  
740 1 3426 3443 3431  
741 1 3428 3443 3431  
742 2 3427 3444 3430  
743 2 3429 3444 3430  
744 1 3426 3446 3433  
745 1 3428 3446 3433  
746 1 3427 3448 3432  
747 1 3429 3448 3432  
748 1 3462 3481 3467  
749 1 3464 3481 3467  
750 1 3463 3482 3466  
751 1 3465 3482 3466  
752 1 3462 3485 3469  
753 1 3464 3485 3469  
754 1 3463 3487 3468  
755 1 3465 3487 3468  
756 3 3455 3502 3503  
757 3 3537 3505 3584  
758 1 3506 3523 3511  
759 1 3508 3523 3511  
760 2 3507 3524 3510  
761 2 3509 3524 3510  
762 1 3506 3526 3513  
763 1 3508 3526 3513  
764 1 3507 3528 3512  
765 1 3509 3528 3512  
766 1 3542 3561 3547  
767 1 3544 3561 3547  
768 1 3543 3562 3546  
769 1 3545 3562 3546  
770 1 3542 3565 3549  
771 1 3544 3565 3549  
772 1 3543 3567 3548  
773 1 3545 3567 3548  
774 3 3535 3582 3583  
775 3 3617 3585 3664  
776 1 3586 3603 3591  
777 1 3588 3603 3591  
778 2 3587 3604 3590  
779 2 3589 3604 3590  
780 1 3586 3606 3593  
781 1 3588 3606 3593  
782 1 3587 3608 3592  
783 1 3589 3608 3592  
784 1 3622 3641 3627  
785 1 3624 3641 3627  
786 1 3623 3642 3626  
787 1 3625 3642 3626  
788 1 3622 3645 3629  
789 1 3624 3645 3629  
790 1 3623 3647 3628  
791 1 3625 3647 3628

```

792 3 3615 3662 3663
793 3 3697 3665 3744
794 1 3666 3683 3671
795 1 3668 3683 3671
796 2 3667 3684 3670
797 2 3669 3684 3670
798 1 3666 3686 3673
799 1 3668 3686 3673
800 1 3667 3688 3672
801 1 3669 3688 3672
802 1 3702 3721 3707
803 1 3704 3721 3707
804 1 3703 3722 3706
805 1 3705 3722 3706
806 1 3702 3725 3709
807 1 3704 3725 3709
808 1 3703 3727 3708
809 1 3705 3727 3708
810 3 3695 3742 3743
811 3 3777 3745 3824
812 1 3746 3763 3751
813 1 3748 3763 3751
814 2 3747 3764 3750
815 2 3749 3764 3750
816 1 3746 3766 3753
817 1 3748 3766 3753
818 1 3747 3768 3752
819 1 3749 3768 3752
820 1 3782 3801 3787
821 1 3784 3801 3787
822 1 3783 3802 3786
823 1 3785 3802 3786
824 1 3782 3805 3789
825 1 3784 3805 3789
826 1 3783 3807 3788
827 1 3785 3807 3788
828 3 3775 3822 3823
829 3 3857 3825 3904
830 1 3826 3843 3831
831 1 3828 3843 3831
832 2 3827 3844 3830
833 2 3829 3844 3830
834 1 3826 3846 3833
835 1 3828 3846 3833
836 1 3827 3848 3832
837 1 3829 3848 3832
838 1 3862 3881 3867
839 1 3864 3881 3867
840 1 3863 3882 3866
841 1 3865 3882 3866
842 1 3862 3885 3869
843 1 3864 3885 3869
844 1 3863 3887 3868
845 1 3865 3887 3868
846 3 3855 3902 3903
847 3 3937 3905 3984
848 1 3906 3923 3911
849 1 3908 3923 3911
850 2 3907 3924 3910
851 2 3909 3924 3910
852 1 3906 3926 3913
853 1 3908 3926 3913
854 1 3907 3928 3912
855 1 3909 3928 3912
856 1 3942 3961 3947
857 1 3944 3961 3947
858 1 3943 3962 3946
859 1 3945 3962 3946
860 1 3942 3965 3949
861 1 3944 3965 3949
862 1 3943 3967 3948
863 1 3945 3967 3948
864 3 3935 3982 3983

```

## LAMMPS Input Script:

```

units          real
atom_style     full
boundary       p p p
pair_style     lj/cut/coul/long 10
pair_modify    mix arithmetic
angle_style    harmonic
bond_style     morse

read_data      110-6x4x4-dClean.data

kspace_style   ewald 0.0001
special_bonds  lj 0.0 0.0 0.5
special_bonds  coul 0.0 0.0 0.8333

```



```
thermo_style custom step etotal ke pe ebond eangle edihed evdwl ecoul elong temp press vol lx ly lz
thermo_modify lost error
thermo 100

timestep 1.0
run_style respa 2 2 pair 1 kspace 2

velocity all create 298 1103 dist gaussian

fix 1 all nve
fix 2 all temp/rescale 1 298.0 298.0 5 1.0

restart 10000 restart.1 restart.2

run 1000000

unfix 2

run 1000000

timestep .001

unfix 1
fix 3 all nve
fix 4 all press/berendsen x 10000 1.0 1000.0 y 10000 1.0 1000.0
fix 5 all temp/rescale 1 298.0 298.0 5 1.0

run 1000000

unfix 4
unfix 5
fix 6 all press/berendsen x 1.0 1.0 10000.0 y 1.0 1.0 10000.0
fix 7 all temp/berendsen 298.0 298.0 100.0
timestep .01

run 1000000

timestep .1
unfix 6
unfix 7
fix 8 all press/berendsen x 1.0 1.0 100000.0 y 1.0 1.0 100000.0
fix 9 all temp/berendsen 298.0 298.0 100.0

run 1000000

timestep 1.0

unfix 8
unfix 9
fix 10 all press/berendsen x 1.0 1.0 1000000.0 y 1.0 1.0 1000000.0
fix 11 all temp/berendsen 298.0 298.0 100.0

run 10000000

unfix 10
unfix 11

run 10000000

dump 1 all custom 2 dump.velo type id x y z vx vy vz
dump_modify 1 sort 2

run 5000000
```

# VASP POSCAR Files

## 110 Face

POSCAR file for pyrophyllite 110 face cut a protonated -- Al 4 H 8 O 26 Si 8

23.449600000000

0.2201658024017470 0.0000000000000000 0.0000000000000000

0.0000000000000000 0.4001816662117900 0.0000000000000000

0.0000000000000000 0.0000000000000000 1.0000000000000000

4 8 26 8

Direct

0.49681 0.00617 0.91017

0.99793 0.00510 0.09041

0.00203 0.00437 0.96768

0.50311 0.00331 0.14791

0.60896 0.69199 0.77915

0.56551 0.46227 0.26623

0.30182 0.66750 0.18180

0.70035 0.34472 0.87660

0.60362 0.15187 0.06234

0.10574 0.16235 0.88408

0.89441 0.84753 0.17410

0.39631 0.85755 0.99573

0.30783 0.89242 0.09483

0.80631 0.89320 0.91505

0.43509 0.65151 0.78659

0.93057 0.65329 0.97037

0.11750 0.11809 0.02902

0.61753 0.11789 0.20908

0.45625 0.35592 0.15894

0.95470 0.35629 0.97893

0.06946 0.35621 0.08772

0.56389 0.35755 0.27145

0.18862 0.10977 0.91500

0.68937 0.10841 0.09507

0.45886 0.32678 0.01781

0.96135 0.32505 0.19825

0.31056 0.90106 0.96301

0.03873 0.68438 0.85984

0.81138 0.89975 0.14311

0.54112 0.68269 0.04027

0.19368 0.11628 0.14302

0.69216 0.11705 0.96325

0.88244 0.89140 0.02907

0.04527 0.65320 0.07916

0.54383 0.65356 0.89914

0.55476 0.35691 0.90364

0.44529 0.65247 0.15442

0.38241 0.89158 0.84900

0.16987 0.28992 0.14723

0.66805 0.29087 0.96720

0.84690 0.71888 0.03173

0.33194 0.71859 0.09089

0.83020 0.71956 0.91085

0.15307 0.29060 0.02635

0.65443 0.29021 0.20639

0.34563 0.71924 0.85169

# 010 Face

POSCAR file for pyrophyllite 010 face cut a protonated -- Al 4 H 8 O 26 Si 8  
23.90910000000

0.2165158872563170 0.0000000000000000 0.0000000000000000  
0.0000000000000000 1.0000000000000000 0.0000000000000000  
0.0000000000000000 0.0000000000000000 0.3903325512043530  
4 8 26 8

Direct

|         |         |          |
|---------|---------|----------|
| 0.50004 | 0.06168 | 0.00003  |
| 0.00004 | 0.87536 | 0.00003  |
| 0.49996 | 0.93832 | -0.00003 |
| 0.99996 | 0.12464 | -0.00003 |
| 0.26693 | 0.78674 | 0.29015  |
| 0.72904 | 0.78626 | 0.71382  |
| 0.31473 | 0.19701 | 0.42235  |
| 0.42462 | 0.19456 | 0.71283  |
| 0.87921 | 0.20879 | 0.07927  |
| 0.22143 | 0.00012 | 0.15924  |
| 0.12477 | 0.79122 | -0.07744 |
| 0.77857 | 0.99988 | -0.15924 |
| 0.97041 | 0.89109 | -0.34630 |
| 0.68968 | 0.11601 | -0.11076 |
| 0.47035 | 0.92219 | -0.34643 |
| 0.18968 | 0.92970 | -0.11076 |
| 0.31032 | 0.88399 | 0.11076  |
| 0.97035 | 0.10850 | -0.34643 |
| 0.31044 | 0.11615 | 0.11073  |
| 0.52959 | 0.92260 | 0.34630  |
| 0.81044 | 0.92984 | 0.11073  |
| 0.02959 | 0.10891 | 0.34630  |
| 0.52965 | 0.07781 | 0.34643  |
| 0.38620 | 0.00004 | 0.10850  |
| 0.90156 | 0.00017 | 0.32805  |
| 0.99894 | 0.19883 | 0.00053  |
| 0.40381 | 0.18968 | 0.33041  |
| 0.61380 | 0.99996 | -0.10850 |
| 0.09844 | 0.99983 | -0.32805 |
| 0.00118 | 0.80117 | -0.00053 |
| 0.59716 | 0.18931 | -0.33106 |
| 0.81032 | 0.07030 | 0.11076  |
| 0.02965 | 0.89150 | 0.34643  |
| 0.68956 | 0.88385 | -0.11073 |
| 0.47041 | 0.07740 | -0.34630 |
| 0.40341 | 0.81078 | 0.33176  |
| 0.59651 | 0.81039 | 0.66876  |
| 0.18956 | 0.07016 | -0.11073 |
| 0.81577 | 0.06387 | 0.28532  |
| 0.68423 | 0.87721 | -0.28522 |
| 0.18423 | 0.93613 | -0.28532 |
| 0.68423 | 0.12244 | -0.28532 |
| 0.81577 | 0.93648 | 0.28522  |
| 0.31577 | 0.12279 | 0.28522  |
| 0.31577 | 0.87756 | 0.28532  |
| 0.18423 | 0.06352 | -0.28522 |
